# Supplementary material for: Every which way? On predicting tumor evolution using cancer progression models
Source: bioRxiv or medRxiv preprint supplement (doi:10.1101/371039), 2019-04-18

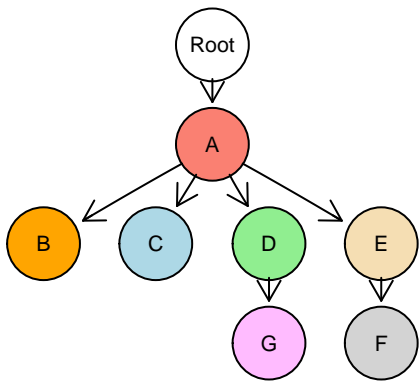

ID 1010kGD9gL10Sq9tJsP  
 acc genotypes 37  
 peaks no back 1  
 removed edges 0  
 prop rem edges 0

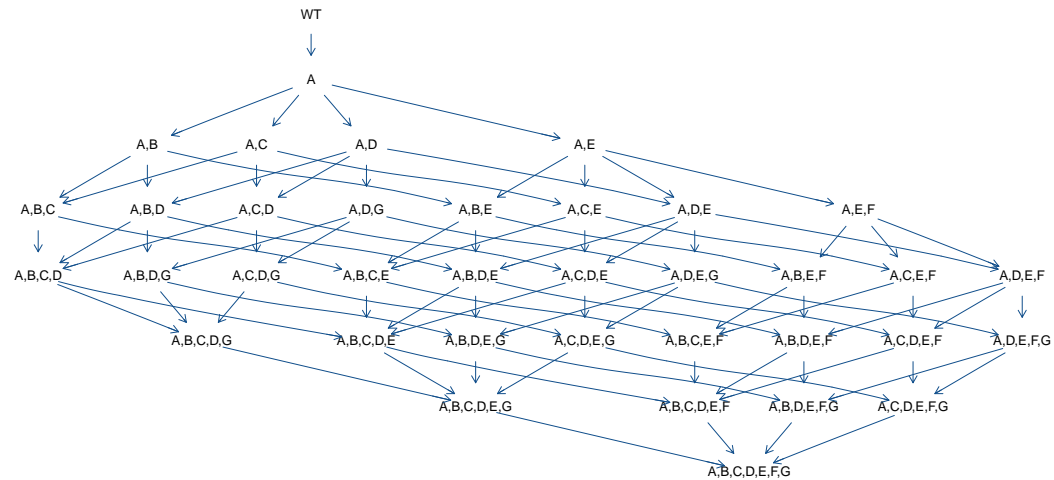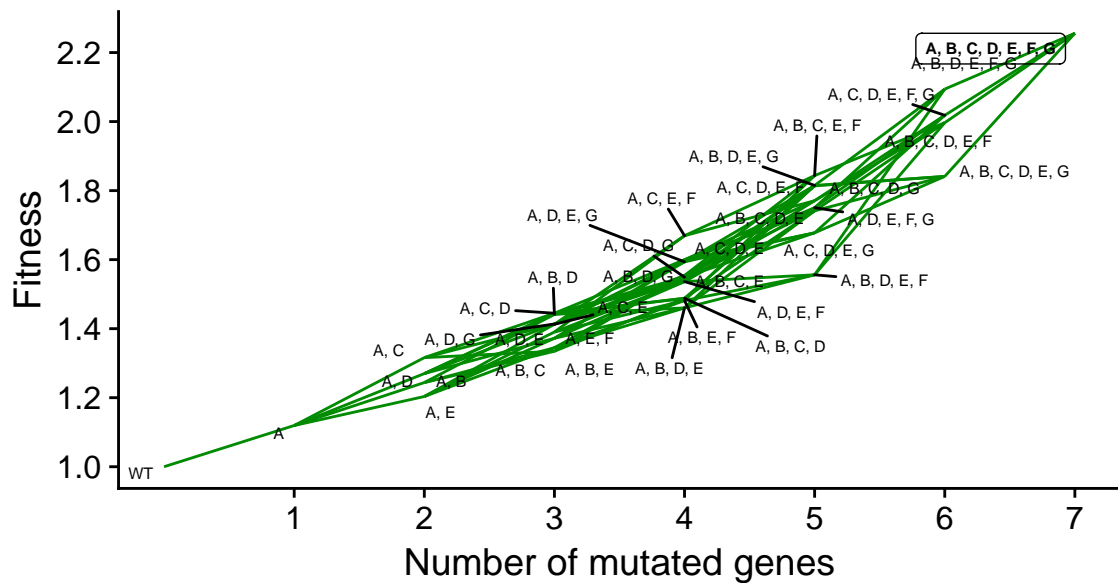

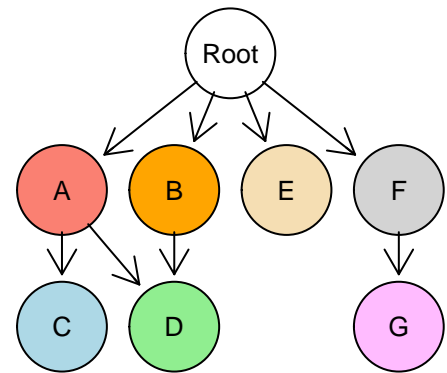

ID 10Dgx114YRhMToSuW  
 acc genotypes 48  
 peaks no back 1  
 removed edges 0  
 prop rem edges 0

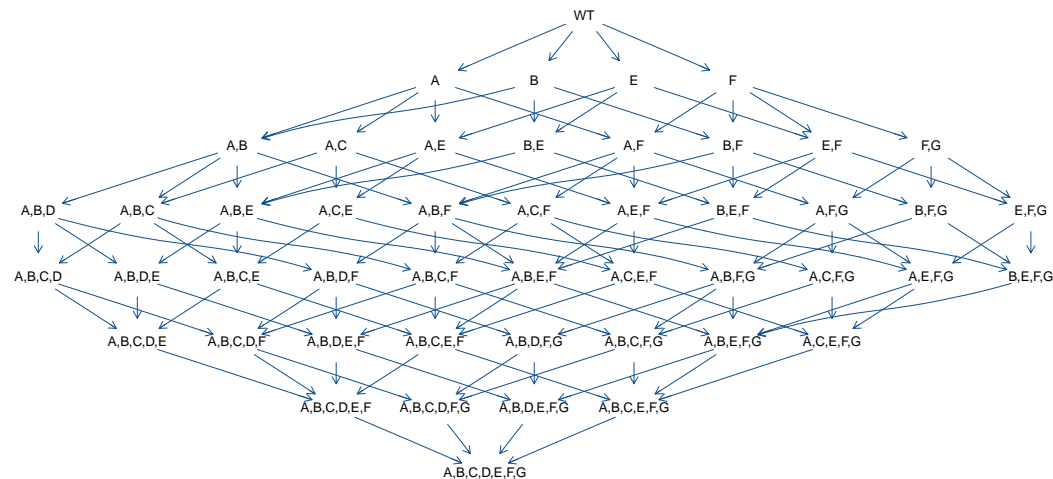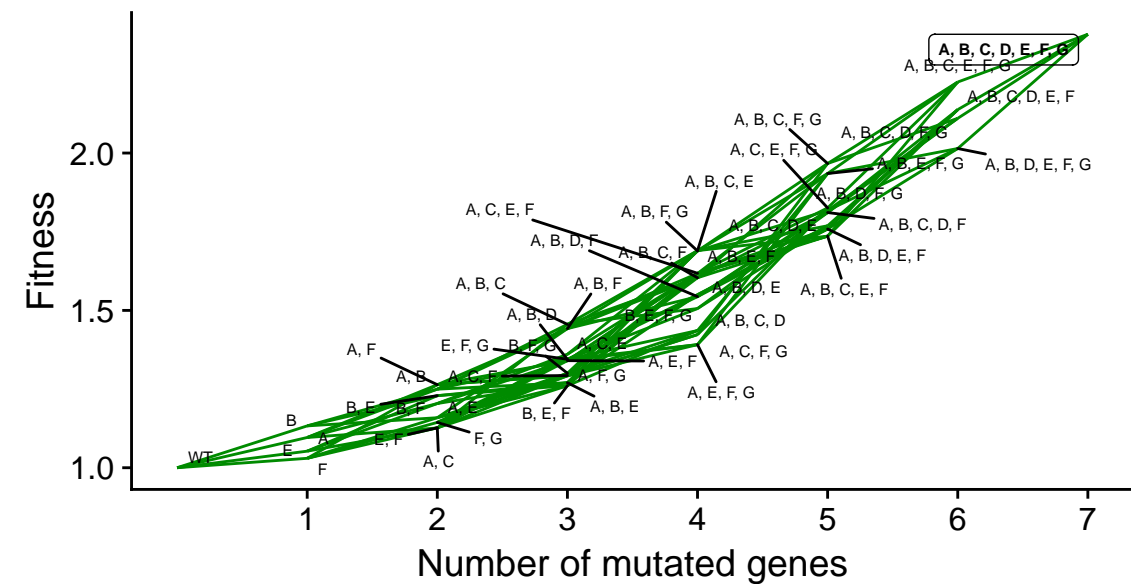

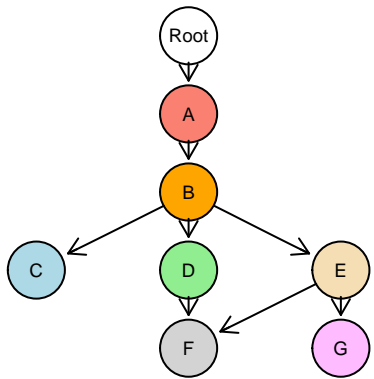

ID 1g3AE5zjGYmnuTbC  
 acc genotypes 18  
 peaks no back 1  
 removed edges 0  
 prop rem edges 0

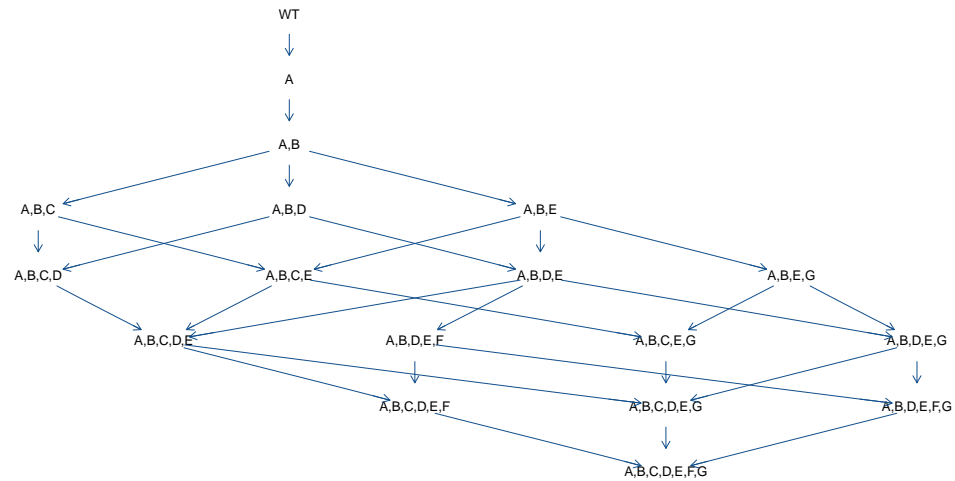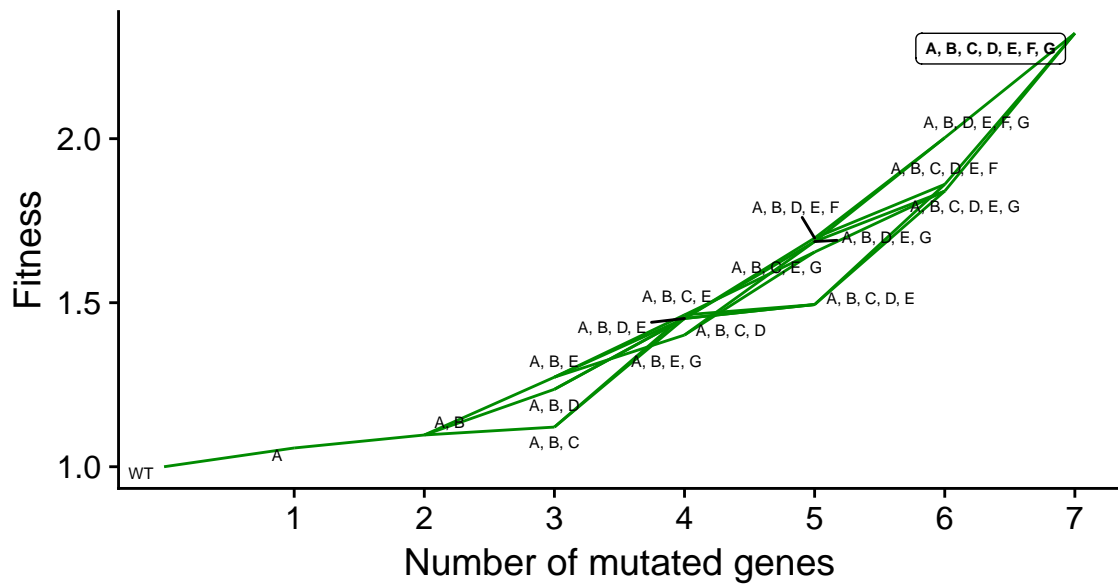

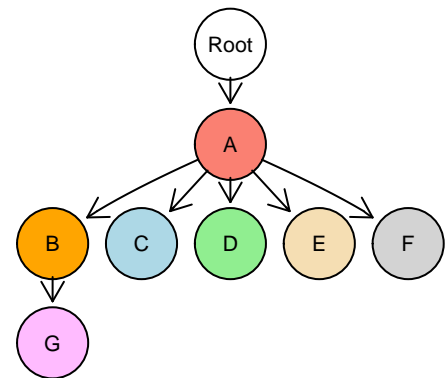

ID 1HutaalyylPzhYID  
 acc genotypes 49  
 peaks no back 1  
 removed edges 0  
 prop rem edges 0

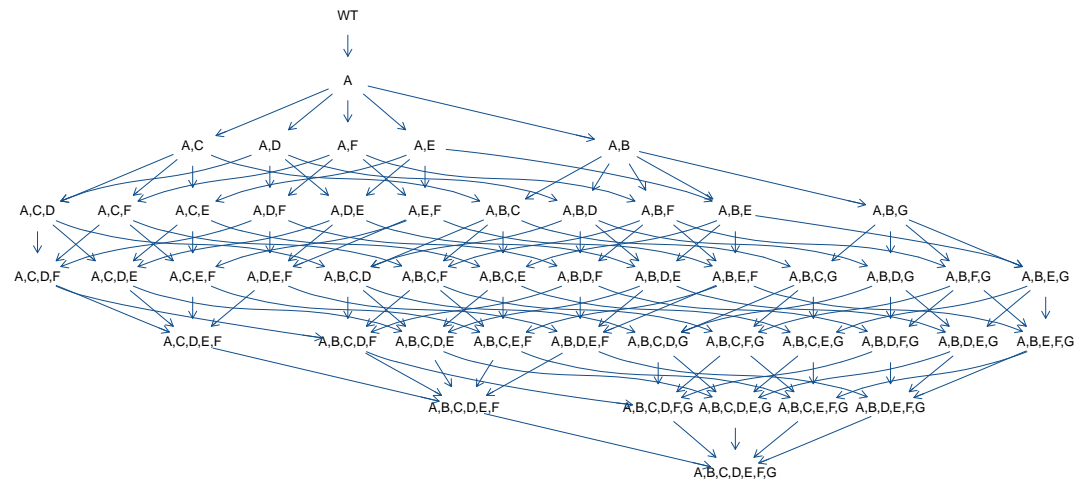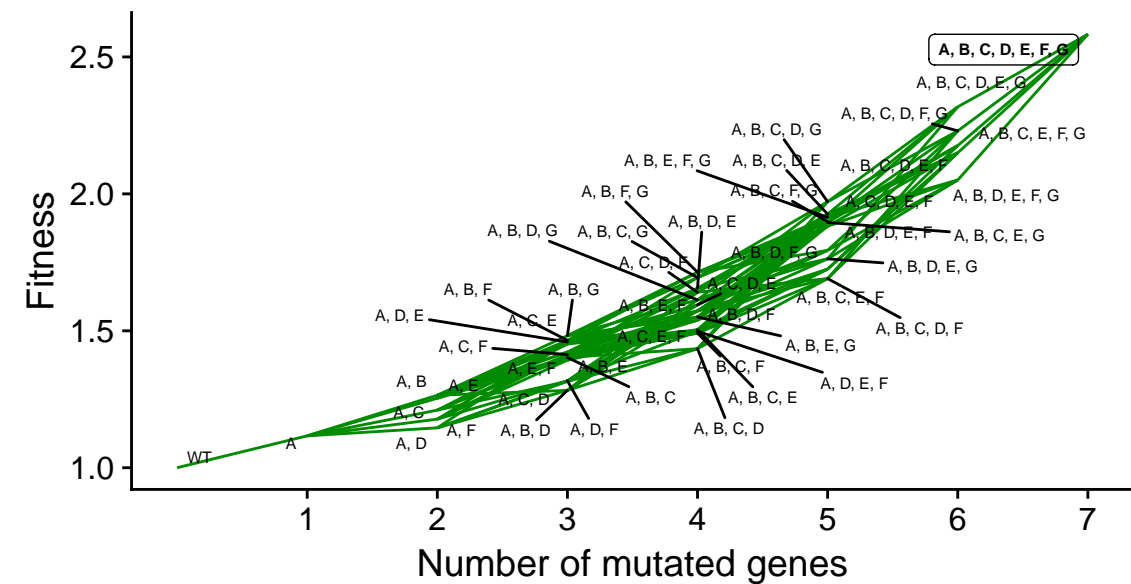

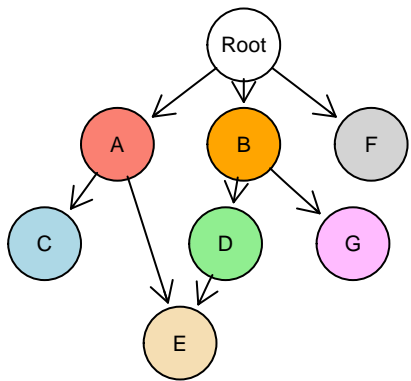

ID 1Mj1yzbmqyN510otm  
 acc genotypes 38  
 peaks no back 1  
 removed edges 0  
 prop rem edges 0

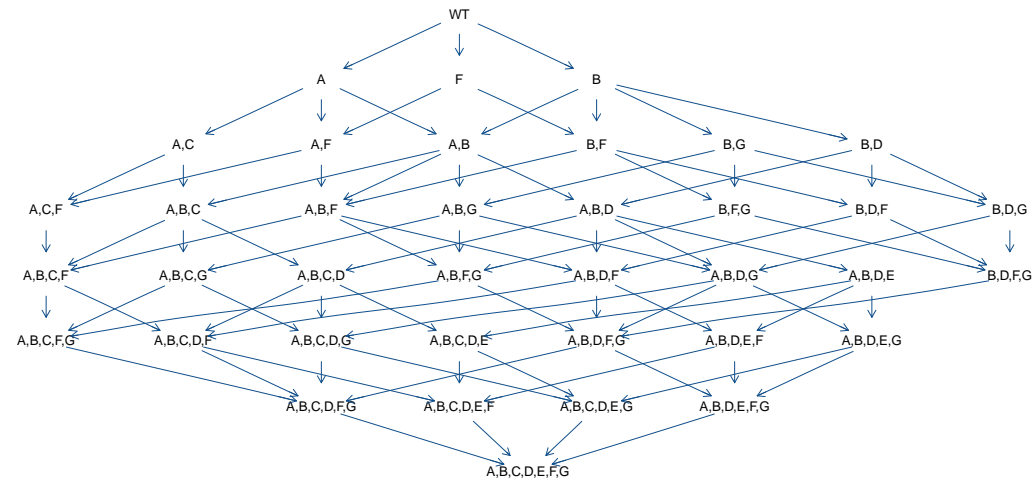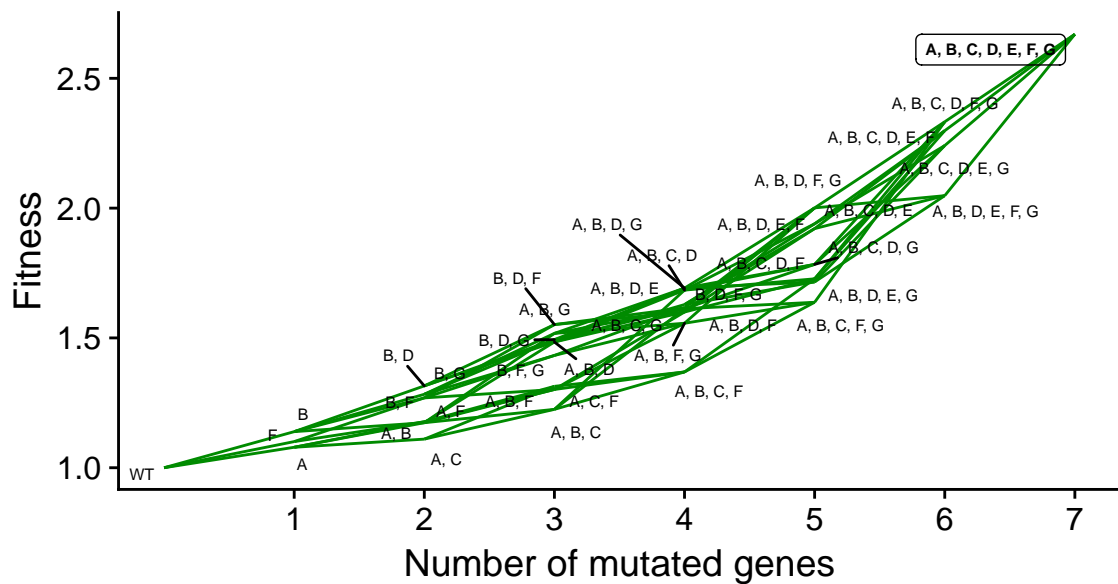

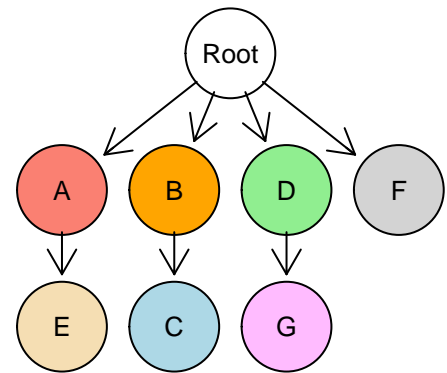

ID 10Ih71InKRui4v2e  
 acc genotypes 54  
 peaks no back 1  
 removed edges 0  
 prop rem edges 0

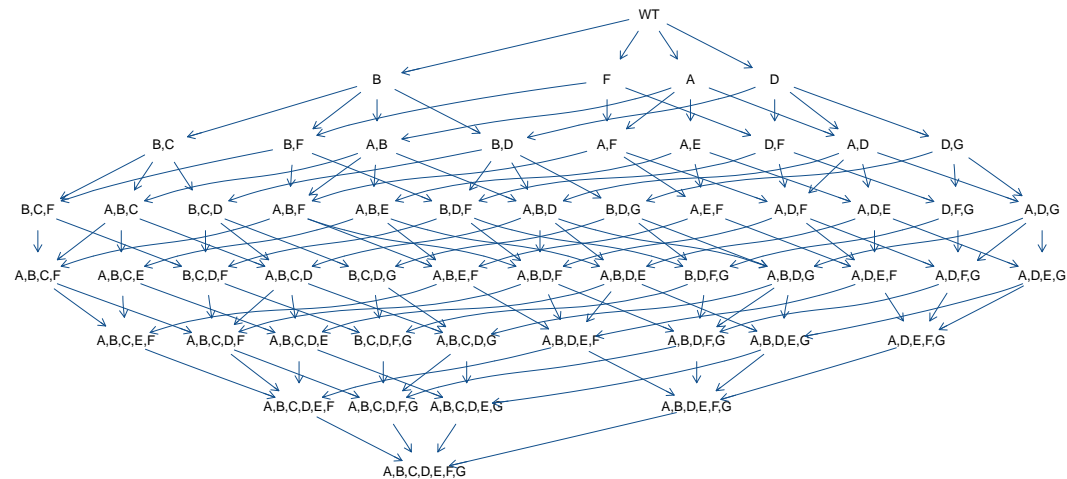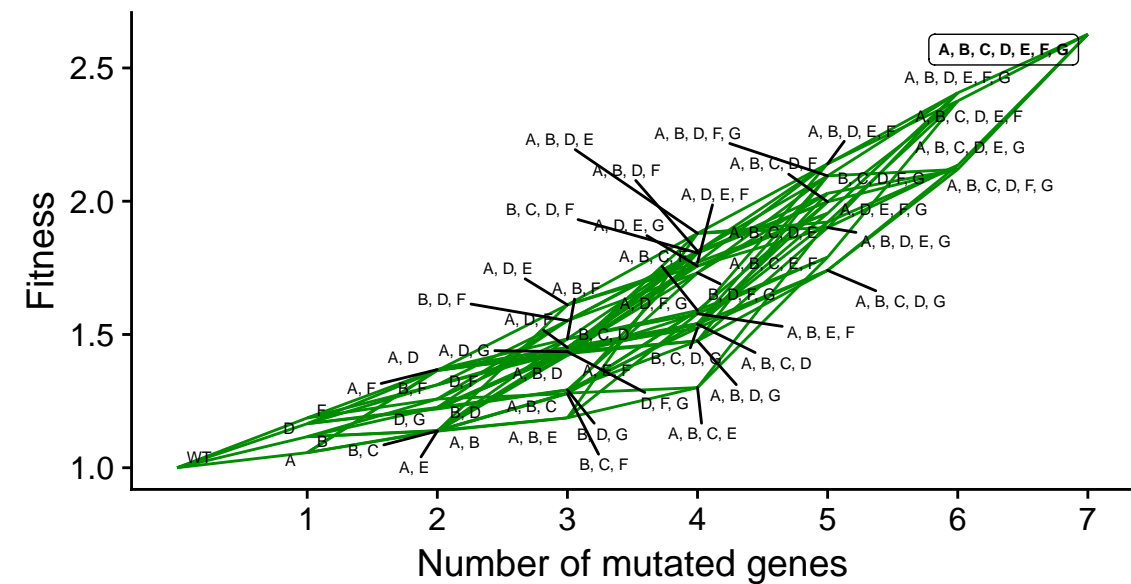

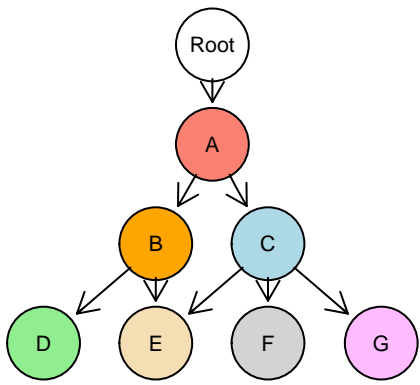

*ID* 1uosnPLLoevoyoqh  
*acc genotypes* 24  
*peaks no back* 1  
*removed edges* 0  
*prop rem edges* 0

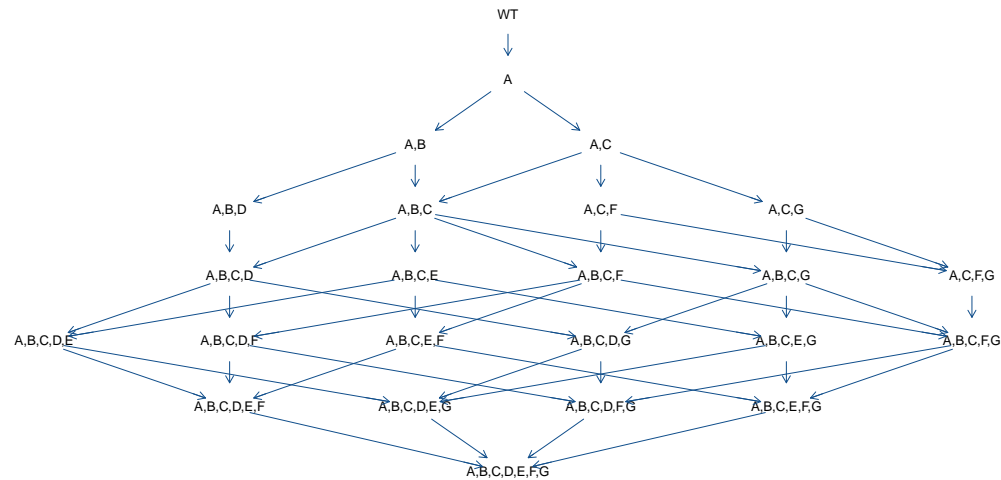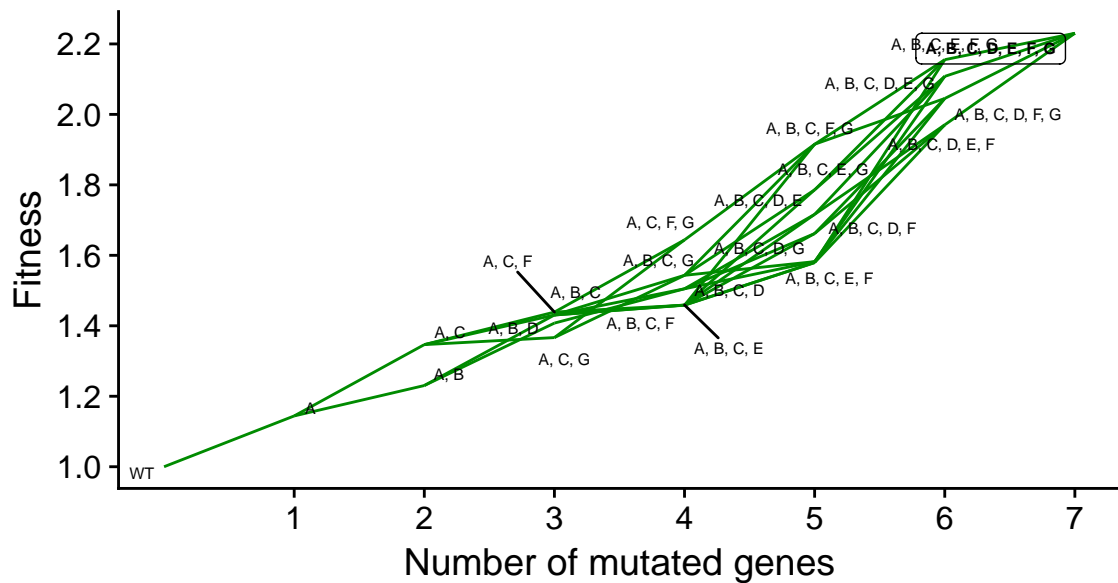

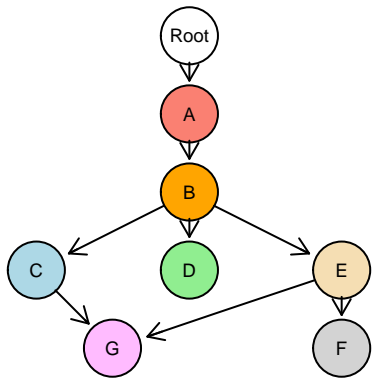

ID 29IH82hKYXw3zuT10  
 acc genotypes 18  
 peaks no back 1  
 removed edges 0  
 prop rem edges 0

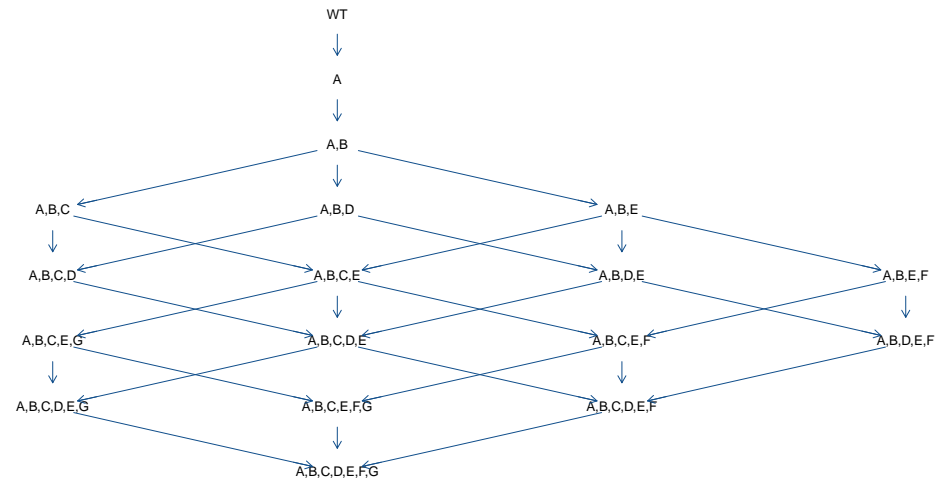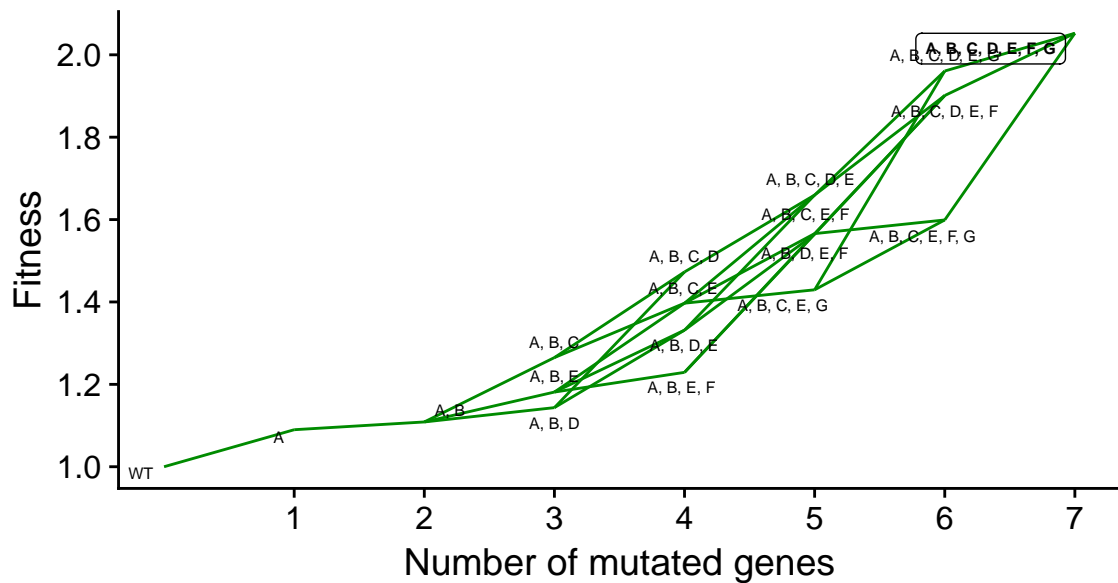



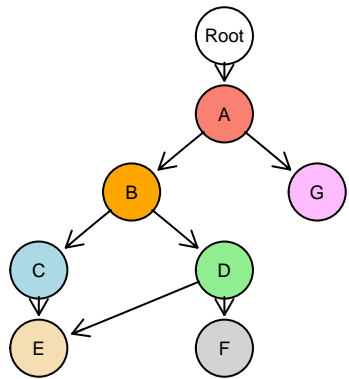

ID 2FyhSdCFo4Nq5dT10  
 acc genotypes 19  
 peaks no back 1  
 removed edges 0  
 prop rem edges 0

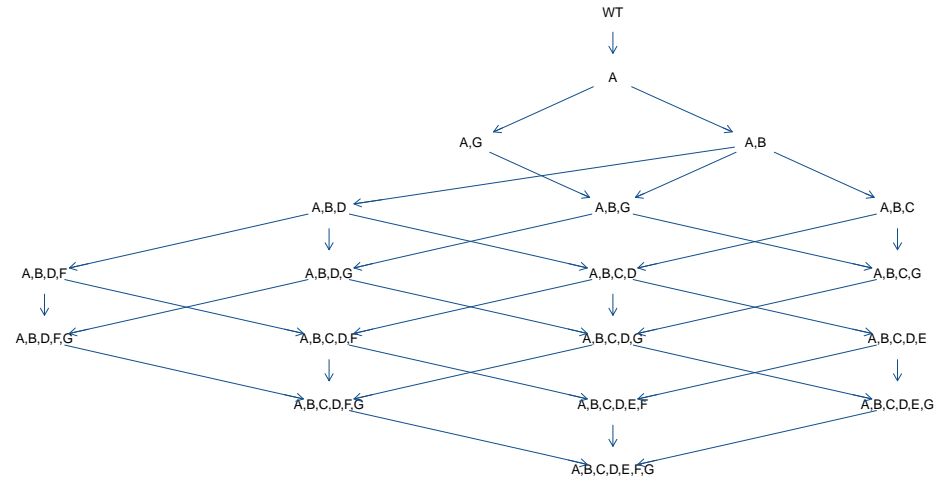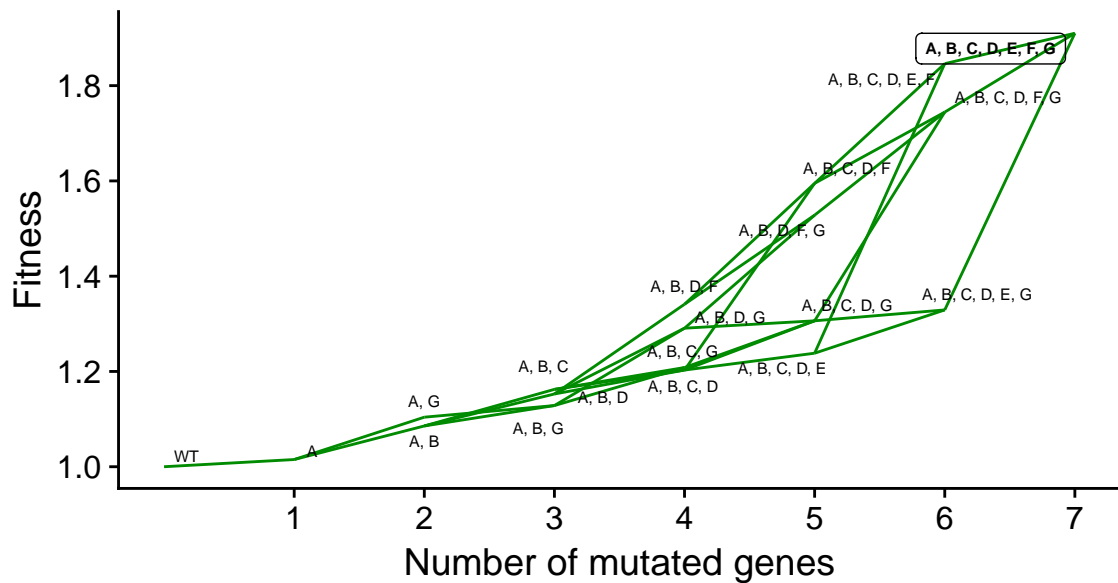

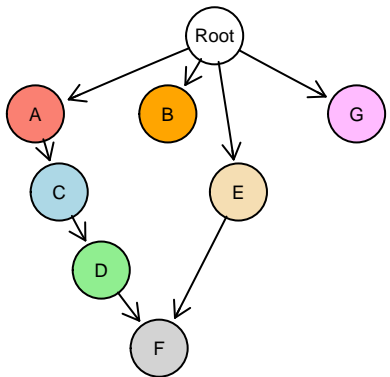

ID **2qPuA9kEjZvpHzWR**  
 acc genotypes **36**  
 peaks no back **1**  
 removed edges **0**  
 prop rem edges **0**

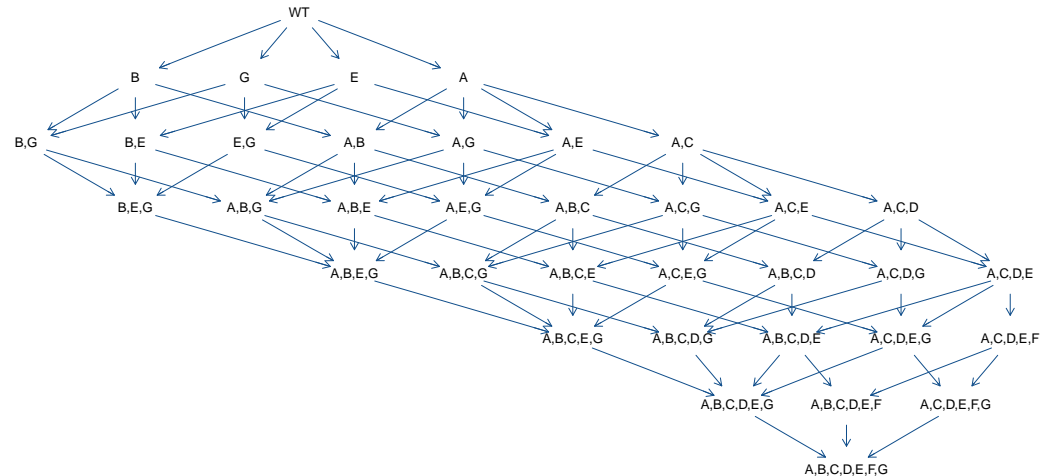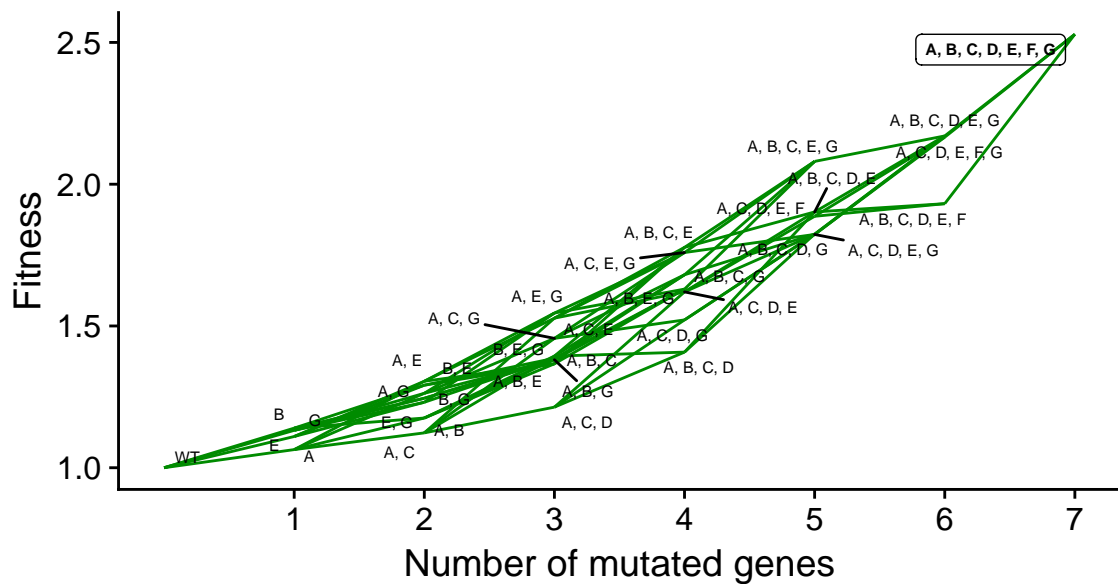

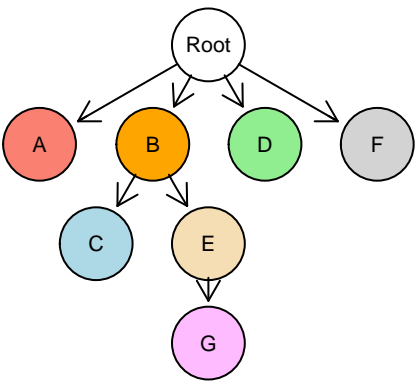

ID **2yfABs8hSv10jftX2**  
 acc genotypes **56**  
 peaks no back 1  
 removed edges 0  
 prop rem edges 0

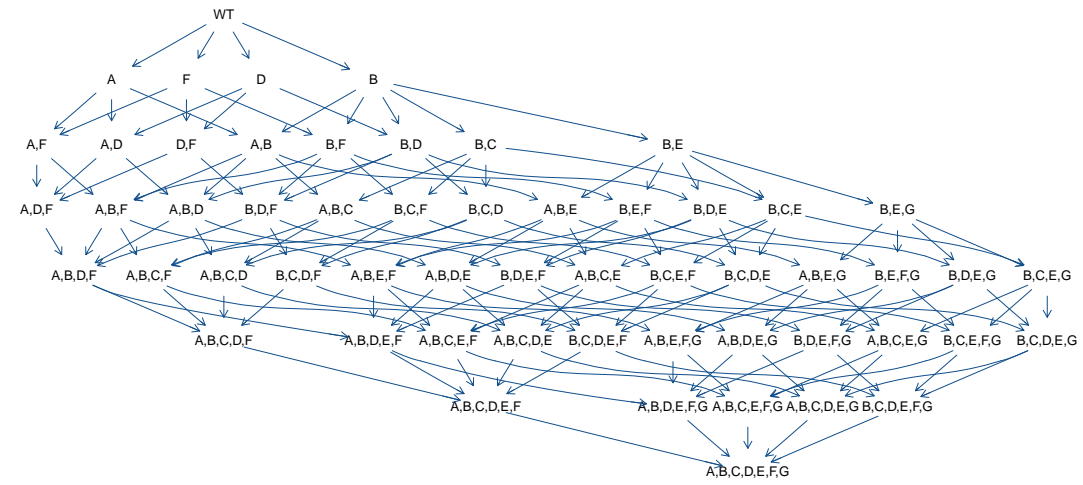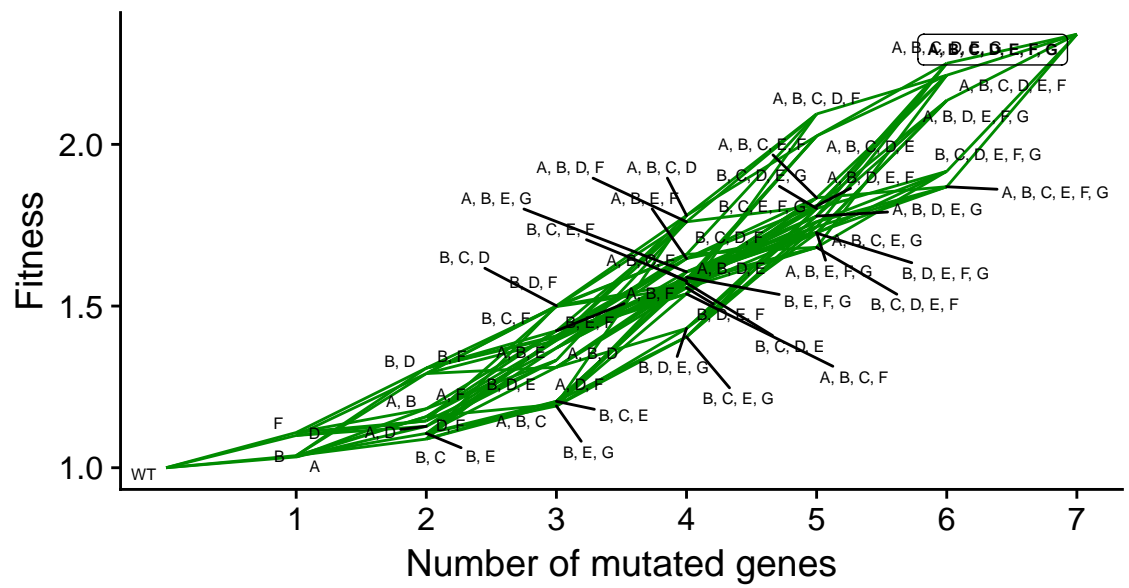

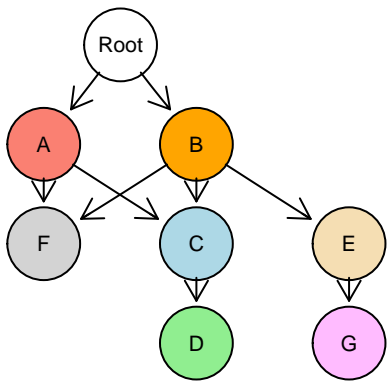

ID 3PMBKfaRwTHJEyD8  
 acc genotypes 23  
 peaks no back 1  
 removed edges 0  
 prop rem edges 0

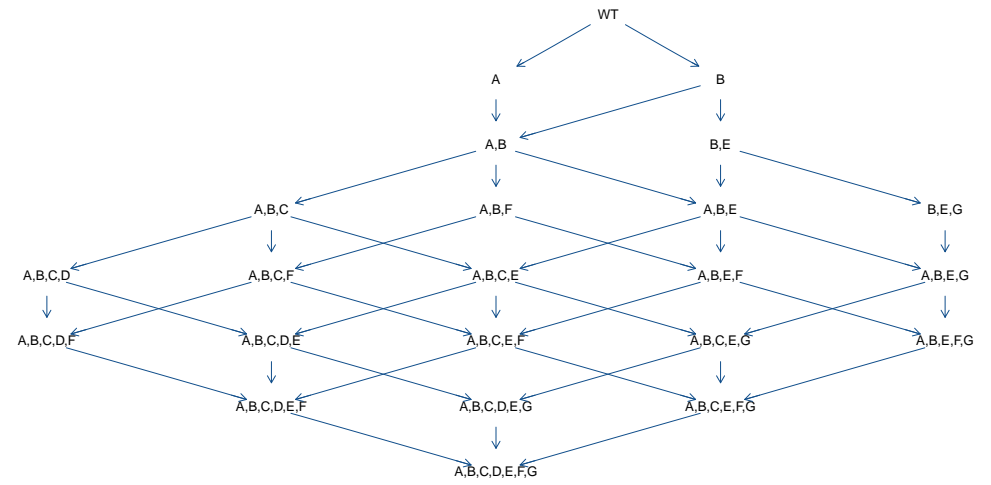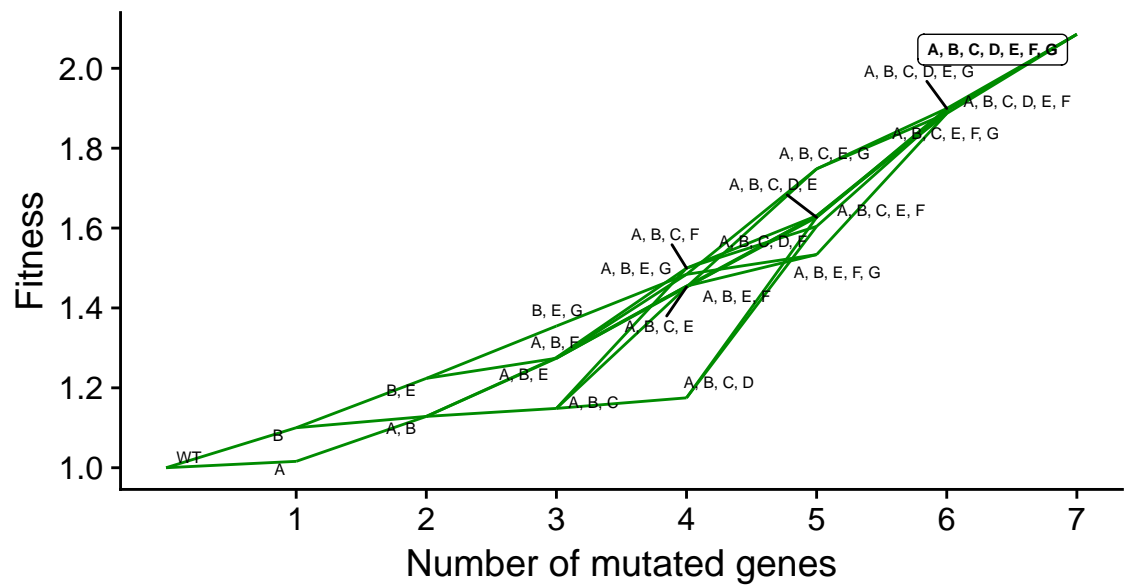

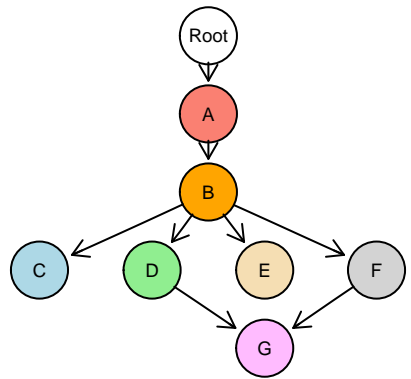

ID 3qyRJOswye1eG84H  
 acc genotypes 22  
 peaks no back 1  
 removed edges 0  
 prop rem edges 0

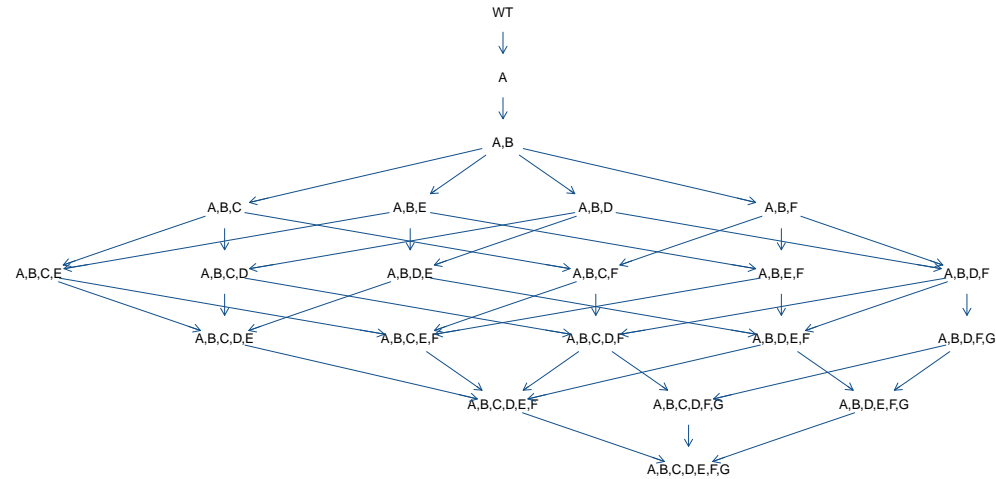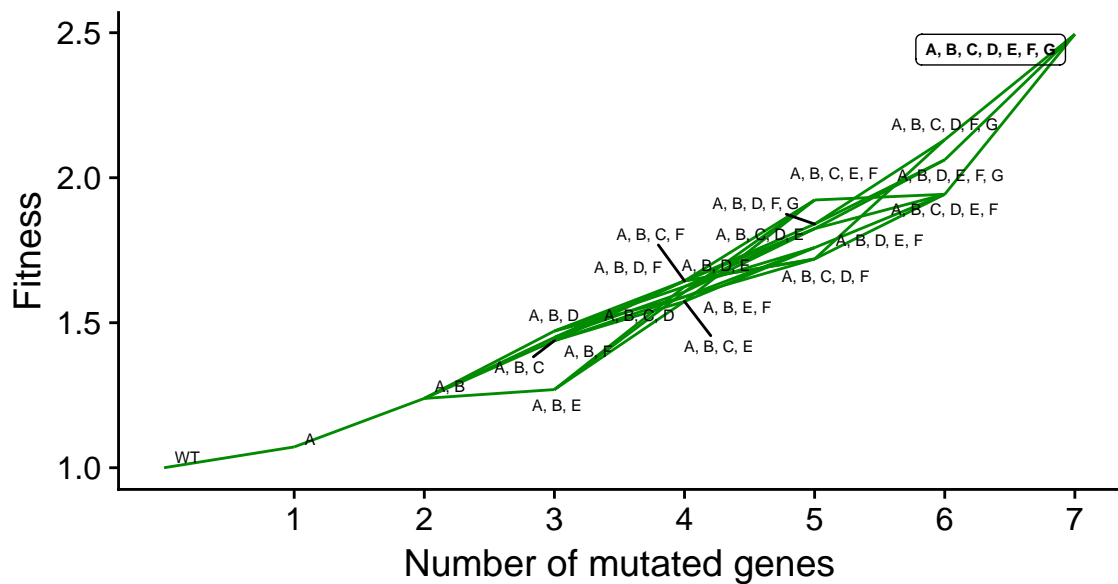

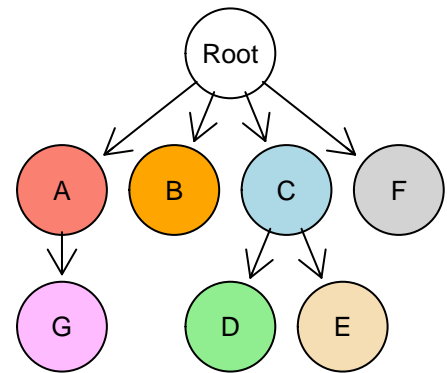

ID 3YPBDYDpA3ERbdMp  
 acc genotypes 60  
 peaks no back 1  
 removed edges 0  
 prop rem edges 0

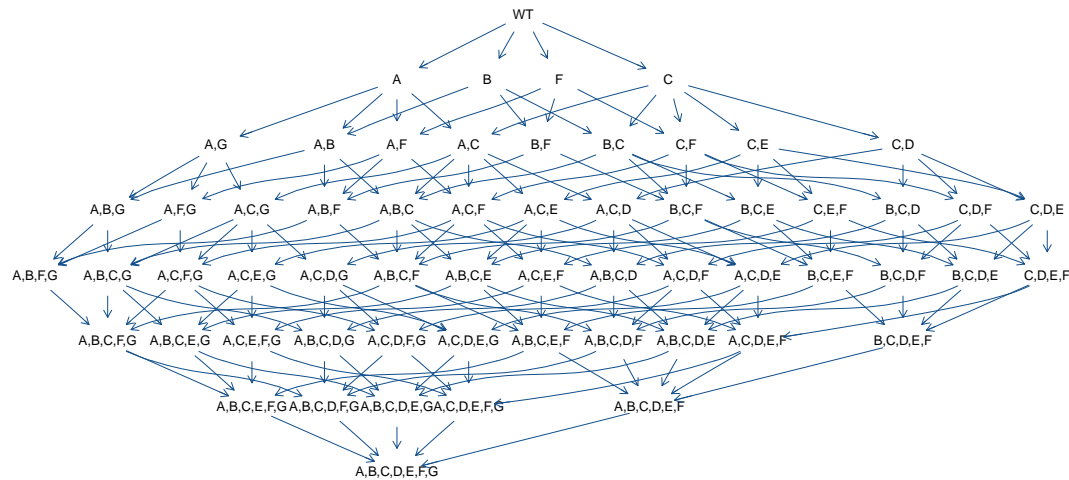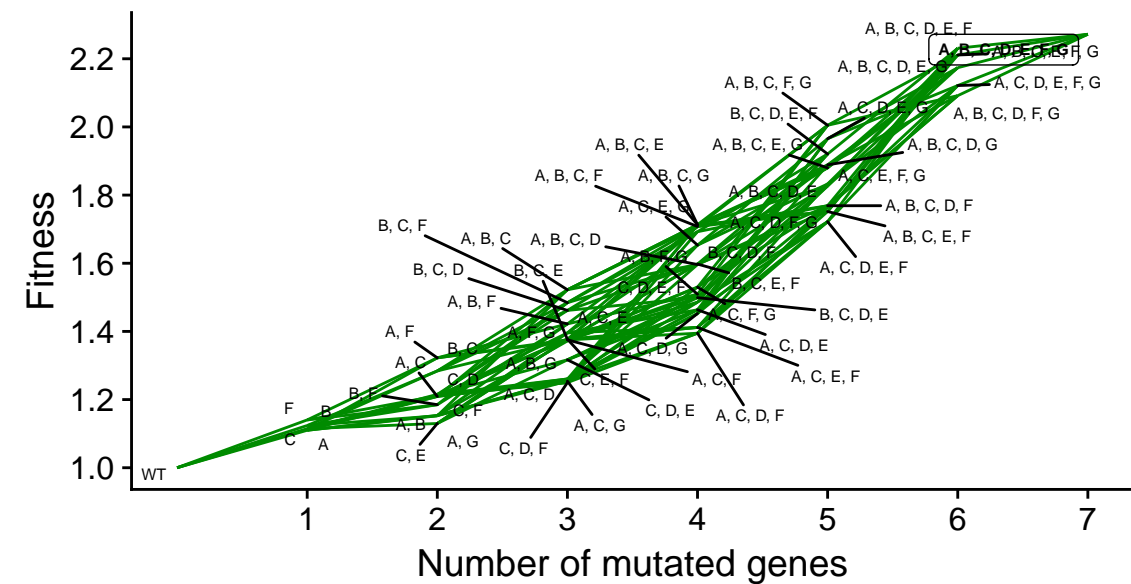

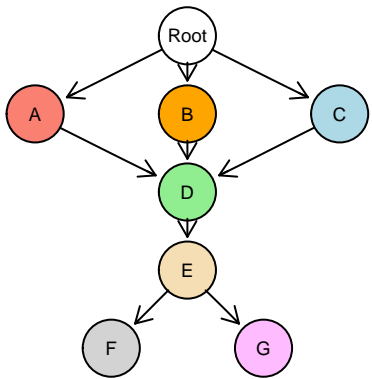

ID 417teASz4uBqj4qQ  
 acc genotypes 13  
 peaks no back 1  
 removed edges 0  
 prop rem edges 0

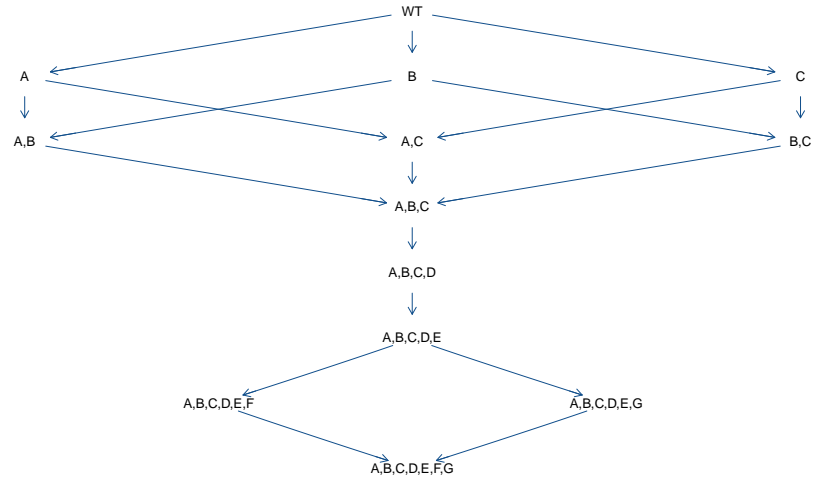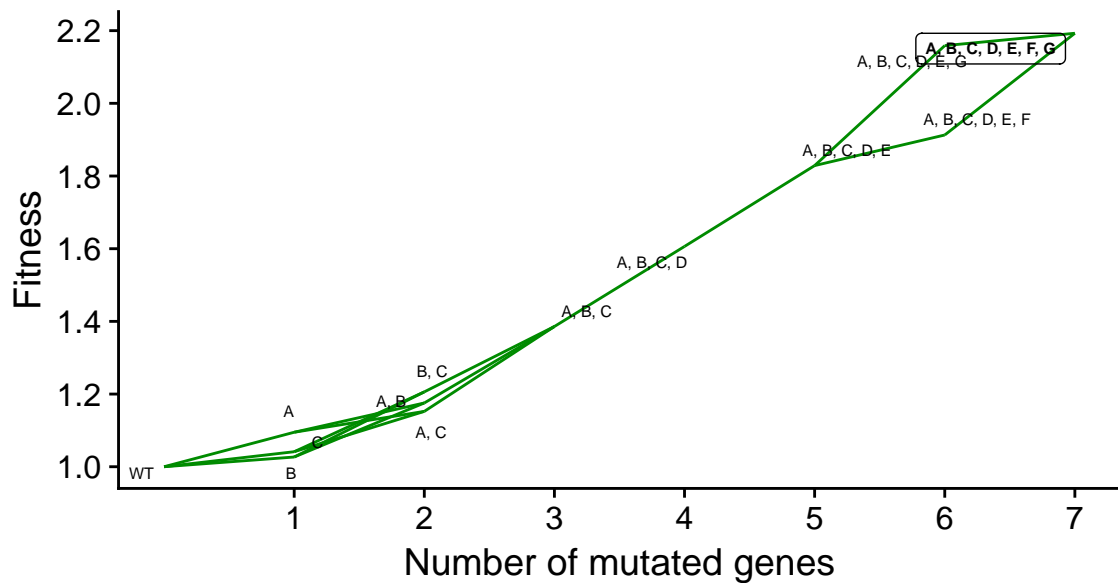

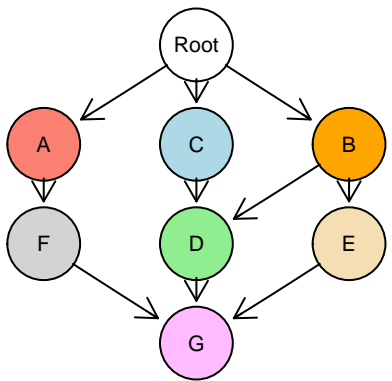

ID 46rFIBbA10BhomWGN  
 acc genotypes 25  
 peaks no back 1  
 removed edges 0  
 prop rem edges 0

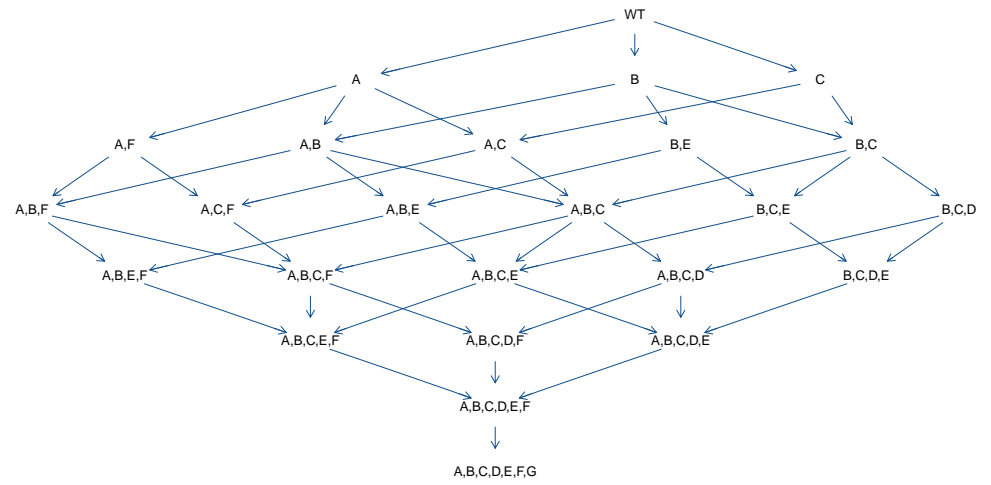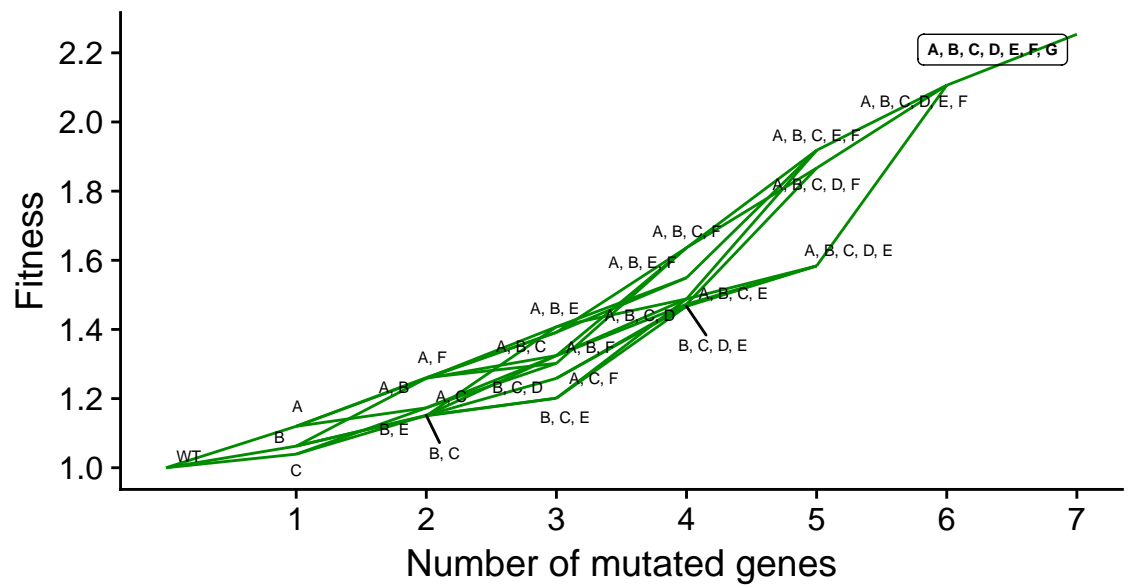



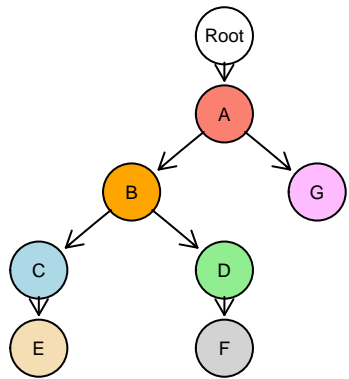

*ID* 4mouiGQselPBUfsX  
*acc genotypes* 21  
*peaks no back* 1  
*removed edges* 0  
*prop rem edges* 0

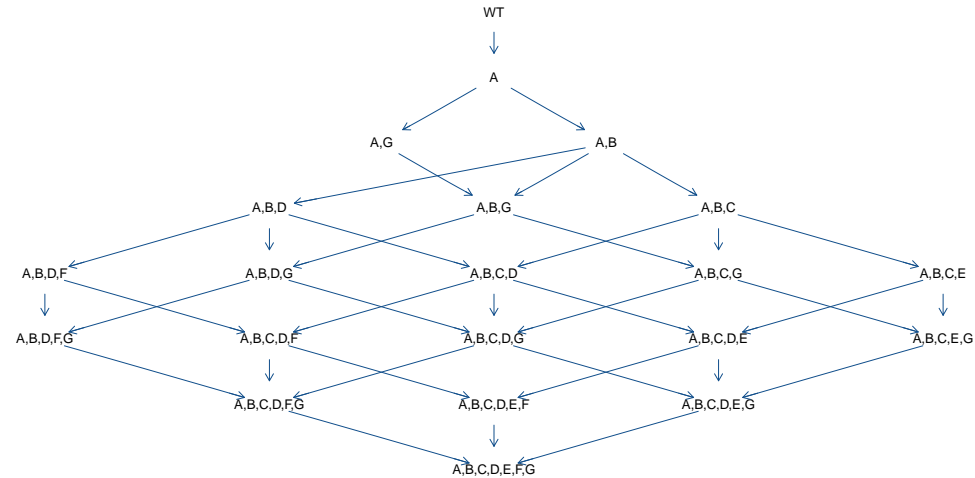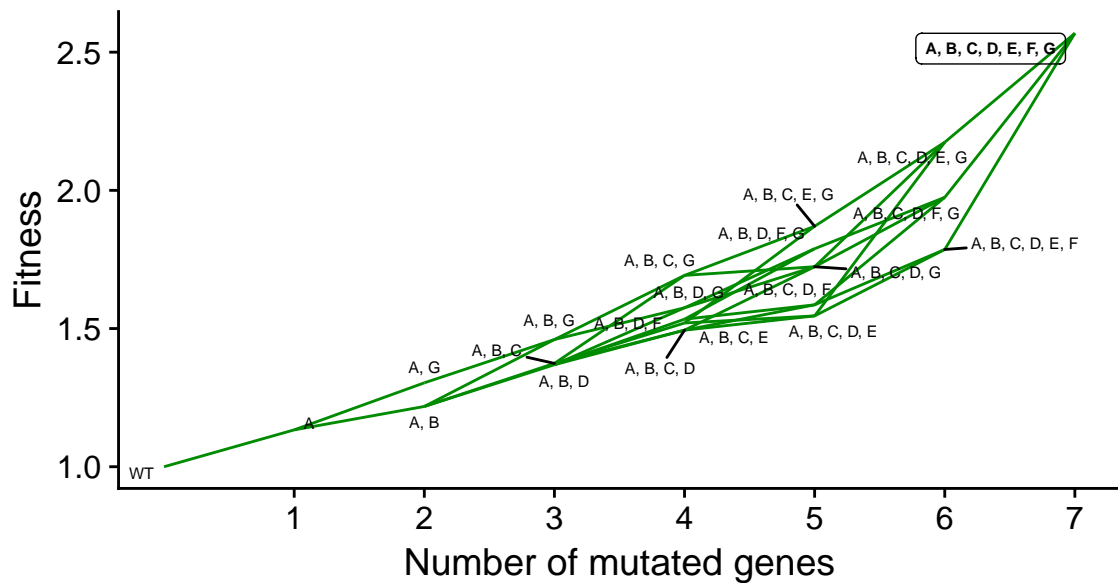

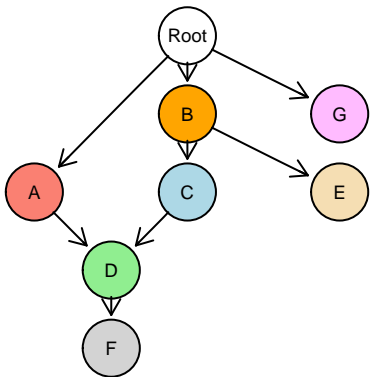

*ID* 4RoAEsprOB10Yv3U6  
*acc genotypes* 28  
*peaks no back* 1  
*removed edges* 0  
*prop rem edges* 0

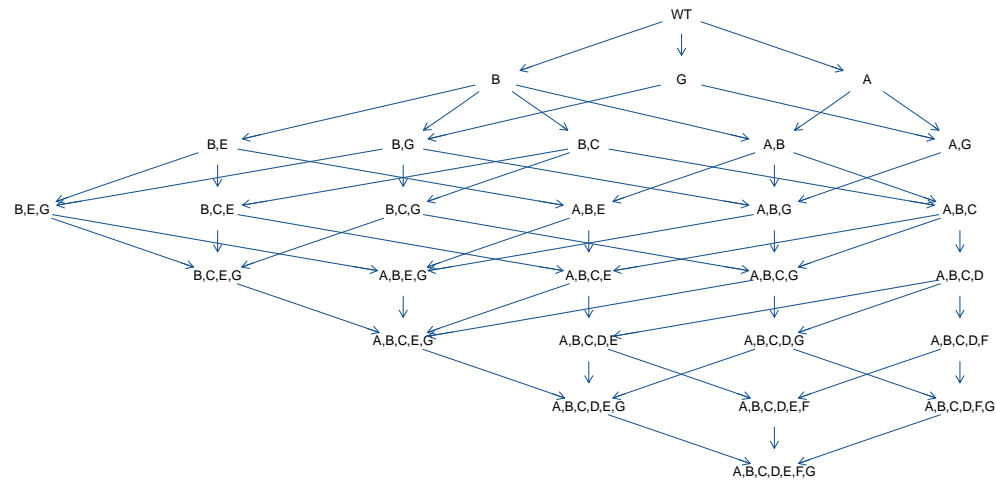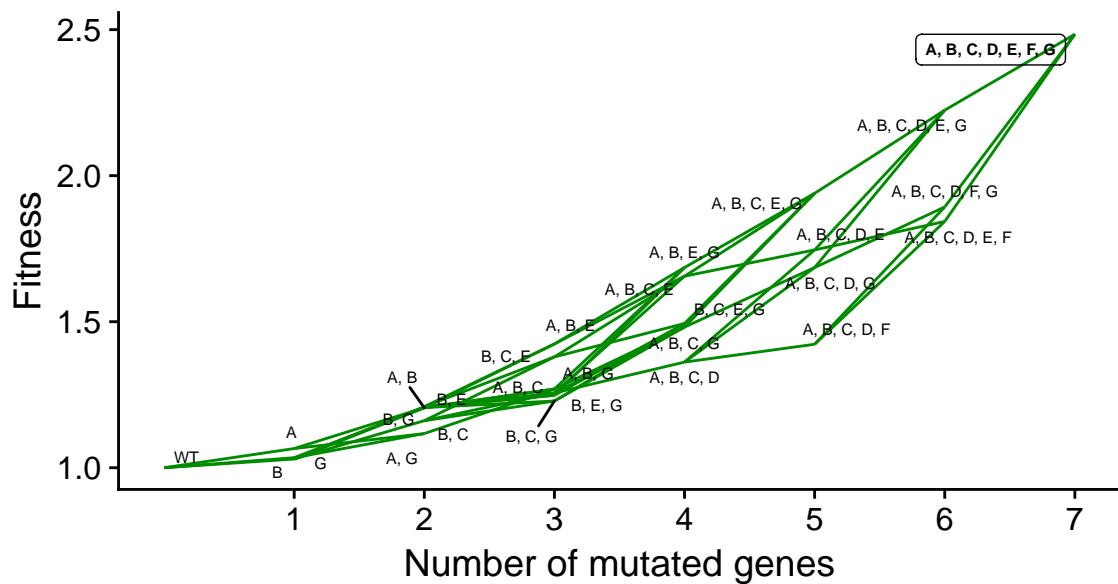

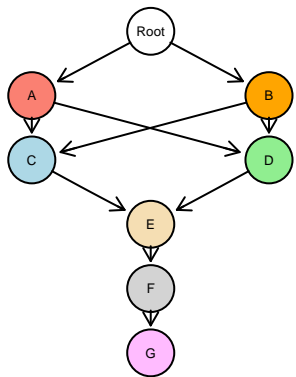

*ID* 4yUgfvZI1UgonSqo  
*acc genotypes* 10  
*peaks no back* 1  
*removed edges* 0  
*prop rem edges* 0

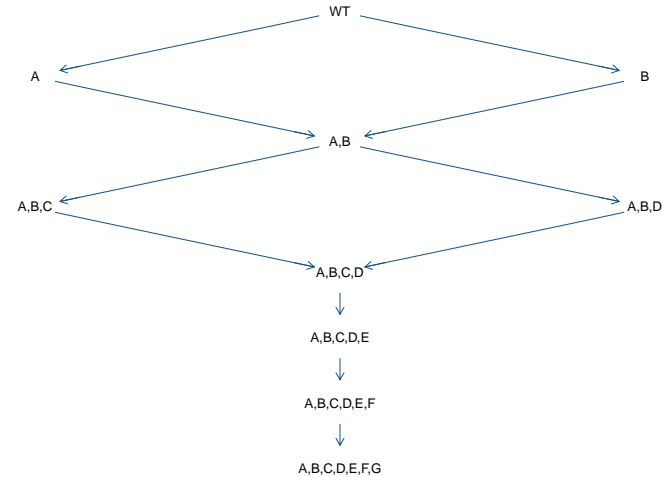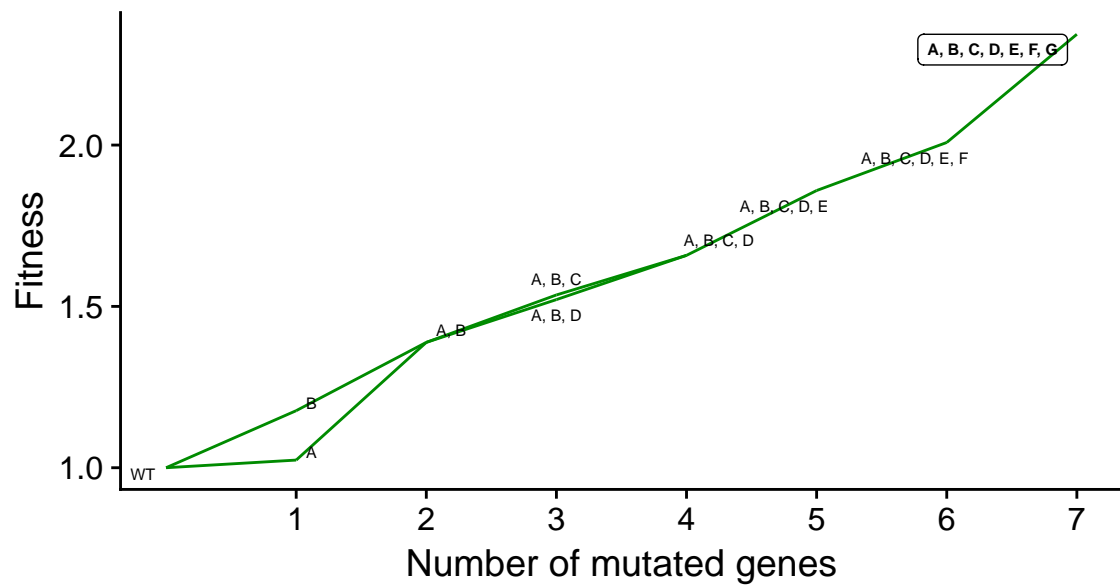

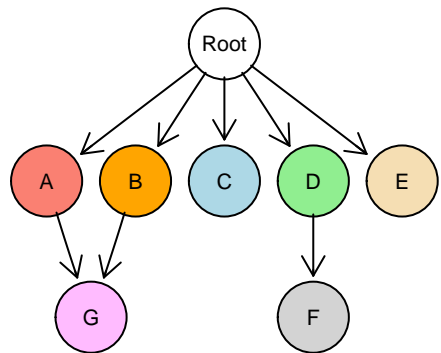

ID 5fz101Z59qlyO10Rxn  
 acc genotypes 60  
 peaks no back 1  
 removed edges 0  
 prop rem edges 0

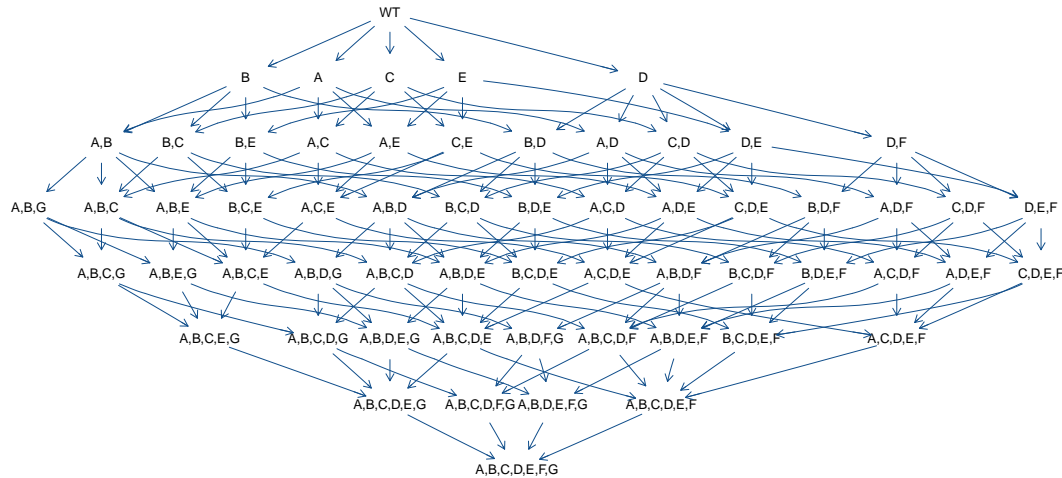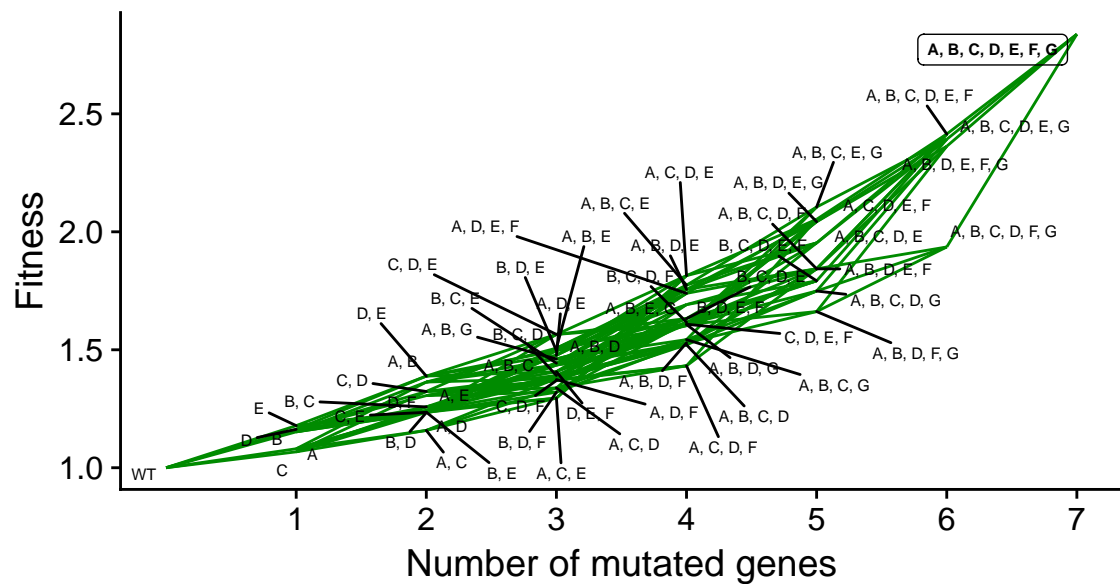

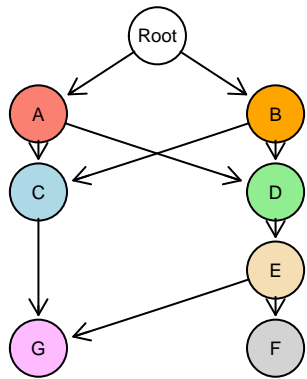

*ID* 6pjAHfBKJ10Ocijgg  
*acc genotypes* 13  
*peaks no back* 1  
*removed edges* 0  
*prop rem edges* 0

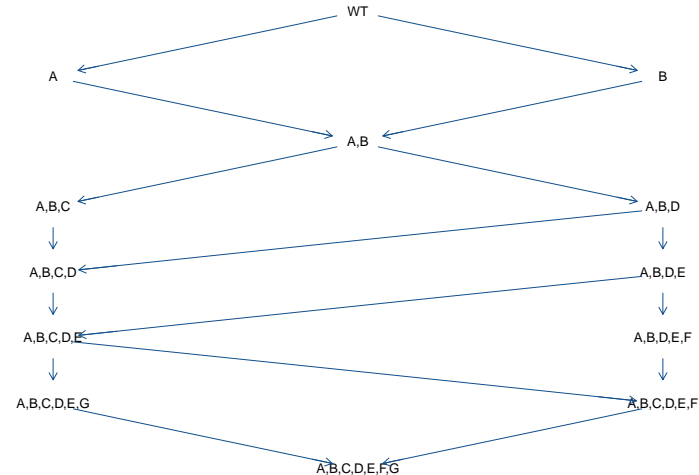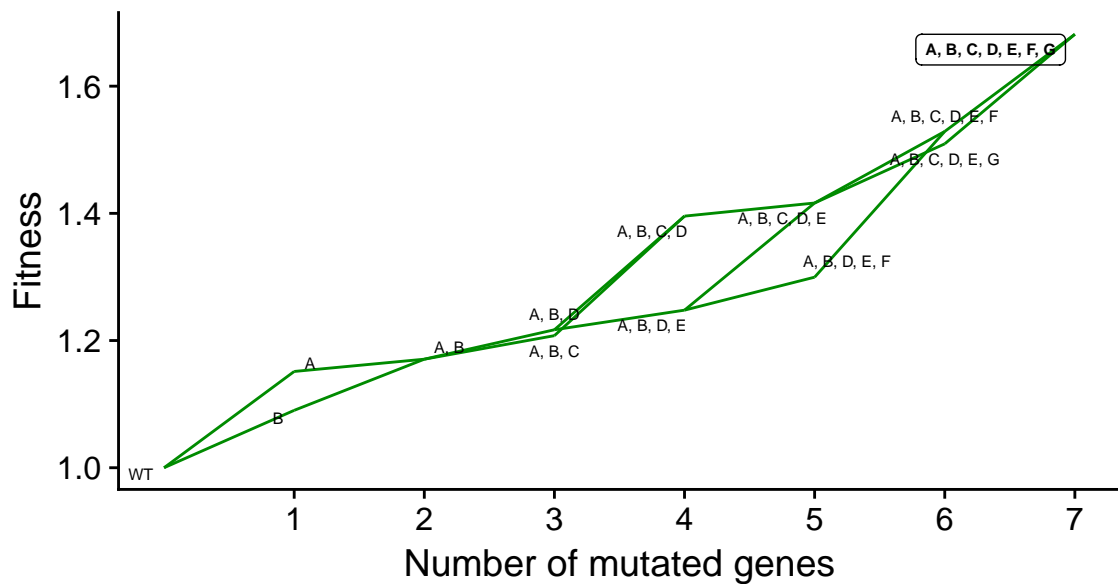

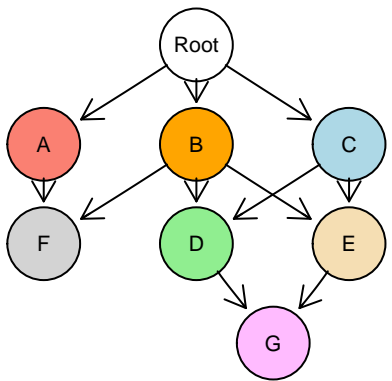

ID 718HviJL2vTZgZyJ  
 acc genotypes 22  
 peaks no back 1  
 removed edges 0  
 prop rem edges 0

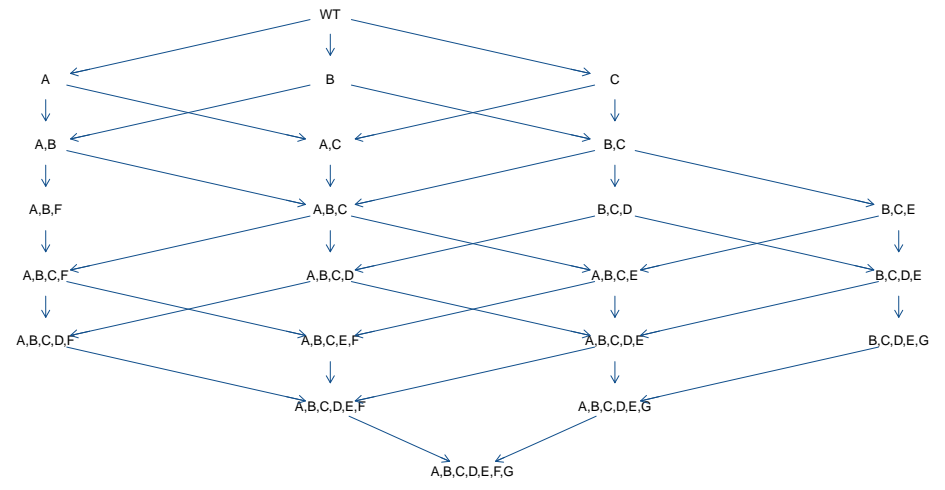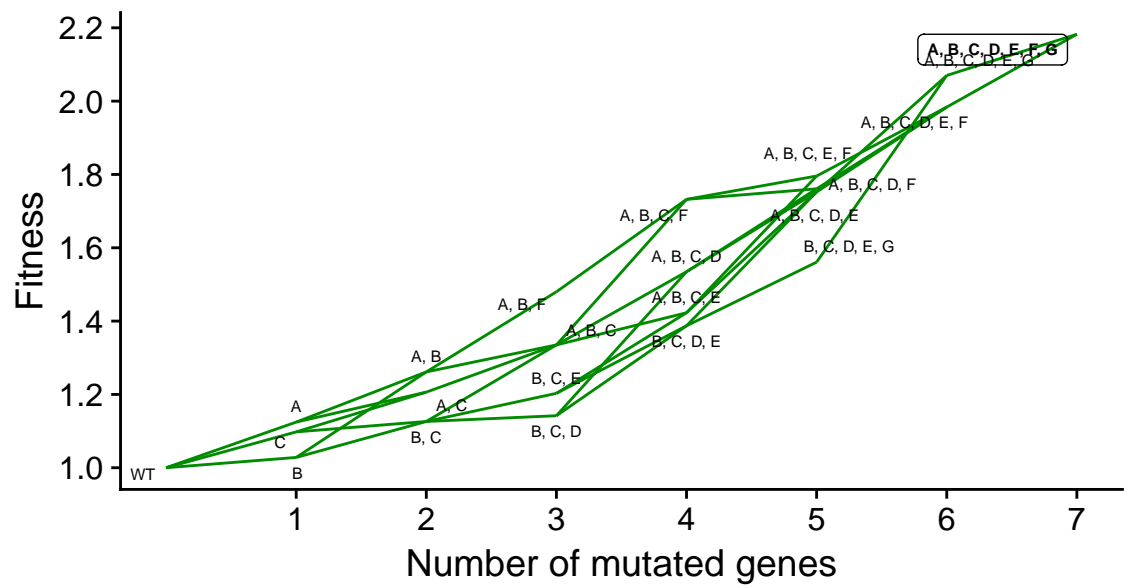

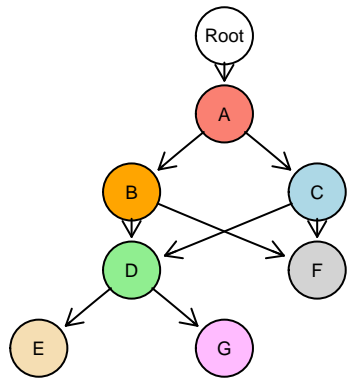

*ID* 7GFrRtiQ5Cyt3w8k  
*acc genotypes* 14  
*peaks no back* 1  
*removed edges* 0  
*prop rem edges* 0

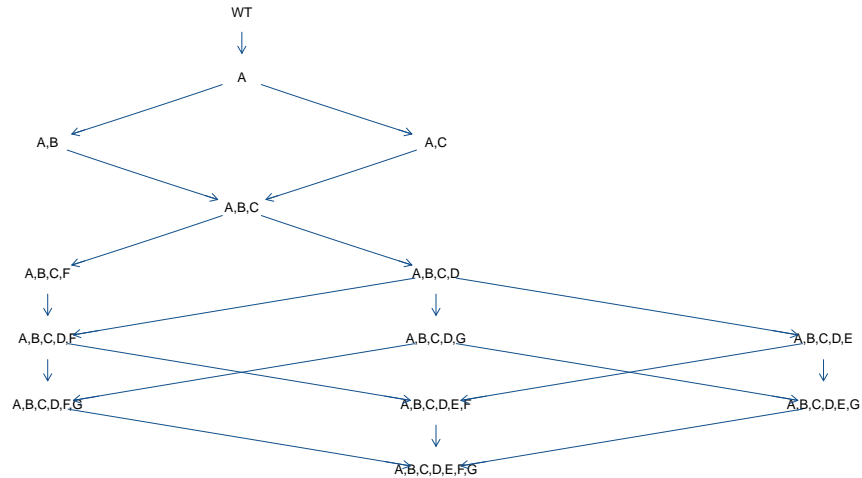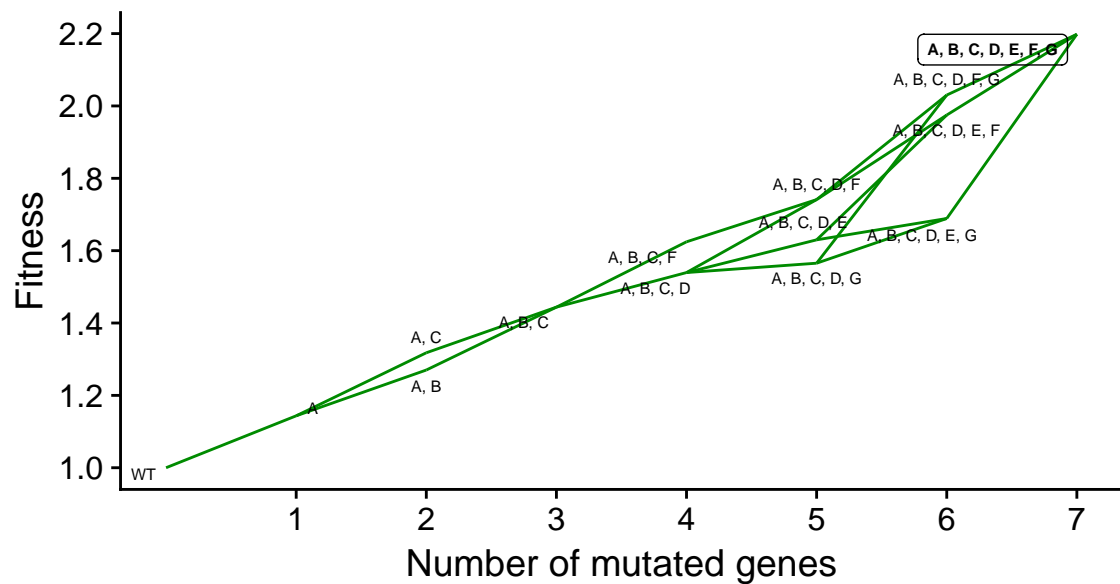

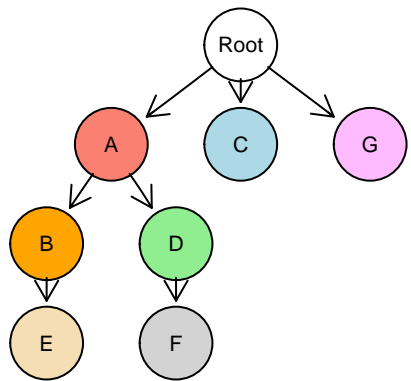

*ID*      7O6M3PSFd6vyICJi  
*acc genotypes*    40  
*peaks no back*      1  
*removed edges*     0  
*prop rem edges*    0

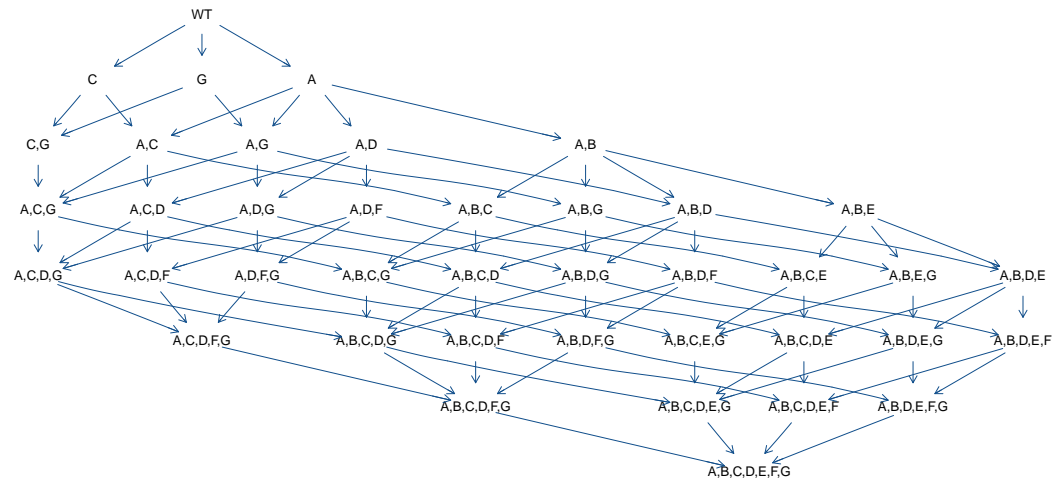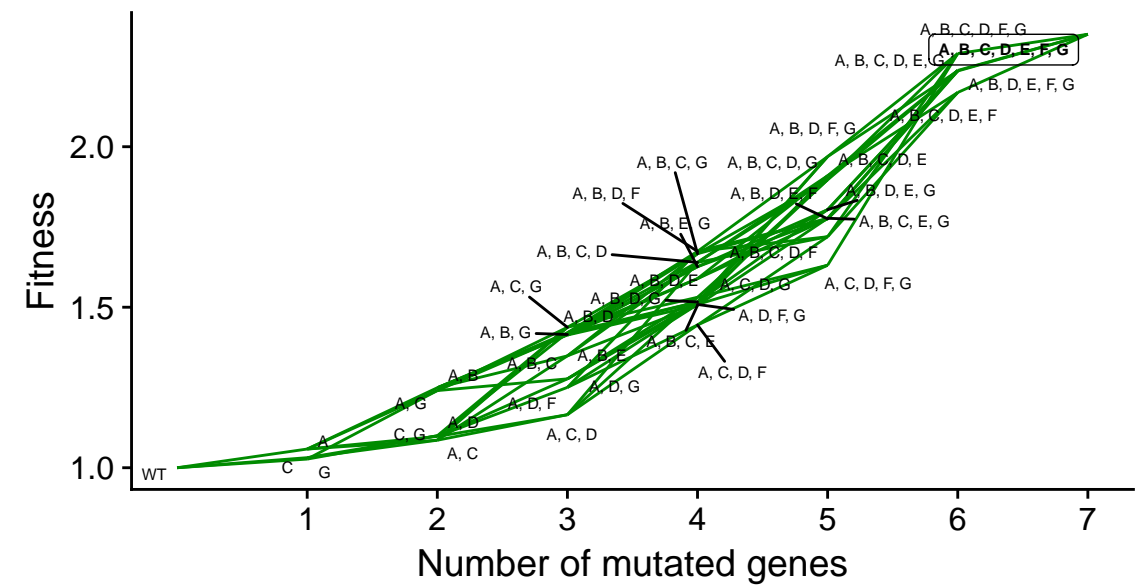



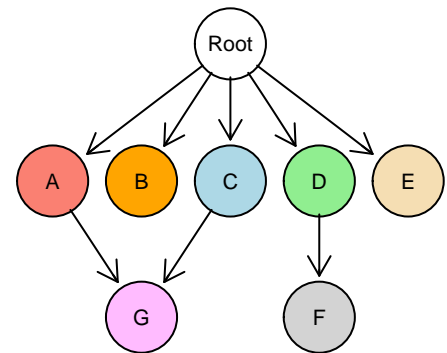

*ID* 8GEzhn1FLKorAfUm  
*acc genotypes* 60  
*peaks no back* 1  
*removed edges* 0  
*prop rem edges* 0

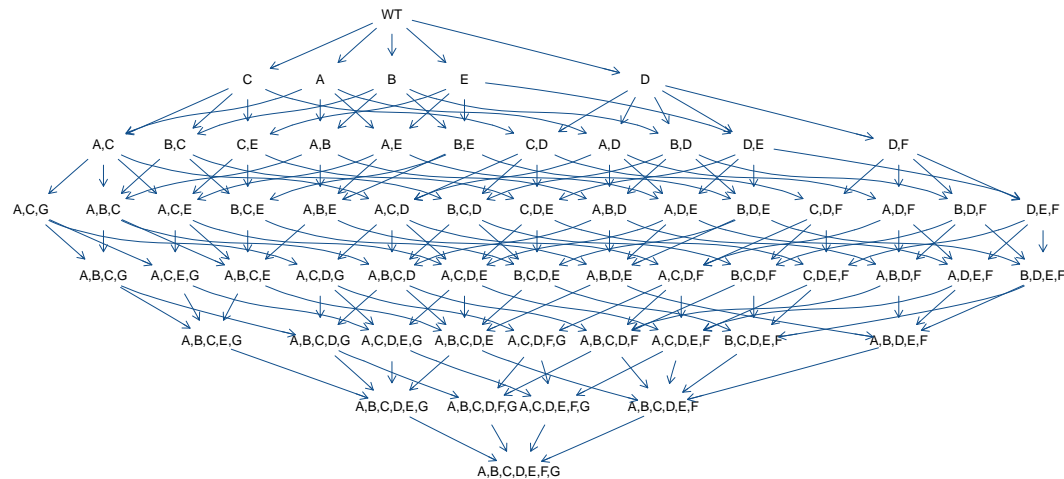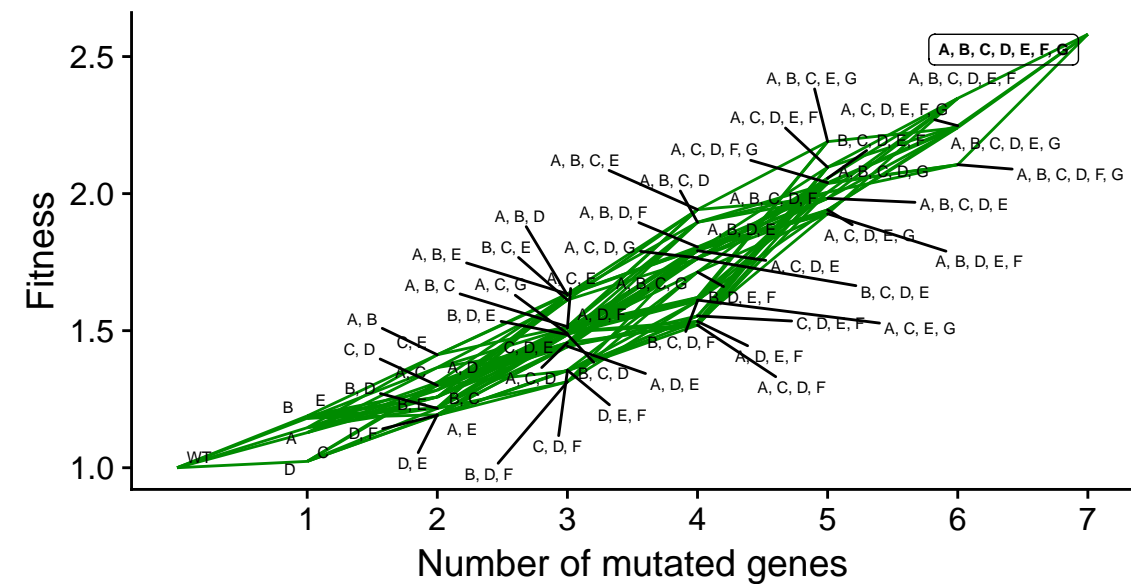

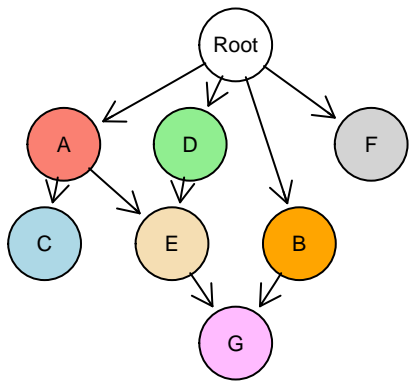

ID 8hAYcae857ZhZJr10  
 acc genotypes 36  
 peaks no back 1  
 removed edges 0  
 prop rem edges 0

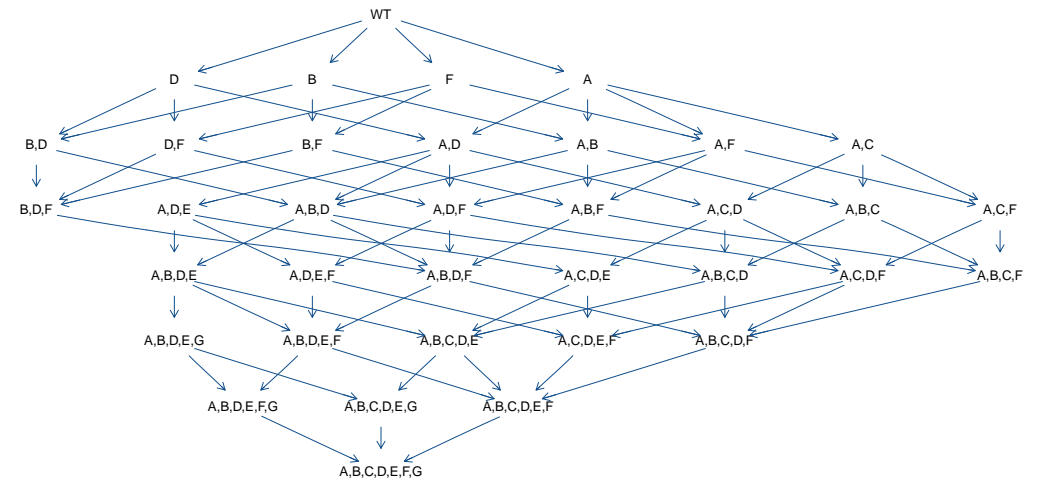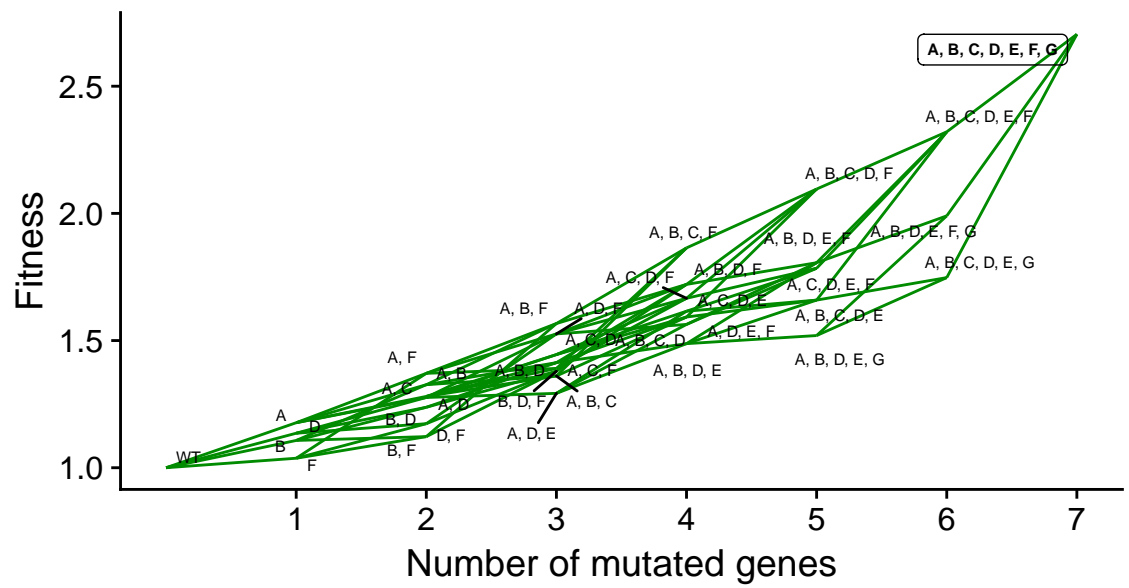

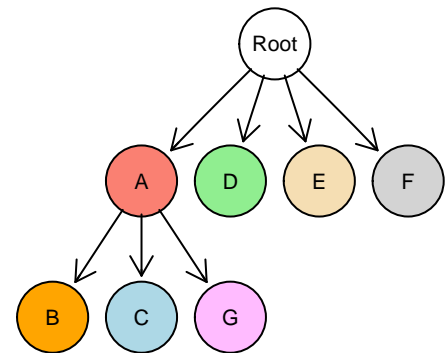

ID **8Zr6qLC9yn9cyhAY**  
 acc genotypes **72**  
 peaks no back **1**  
 removed edges **0**  
 prop rem edges **0**

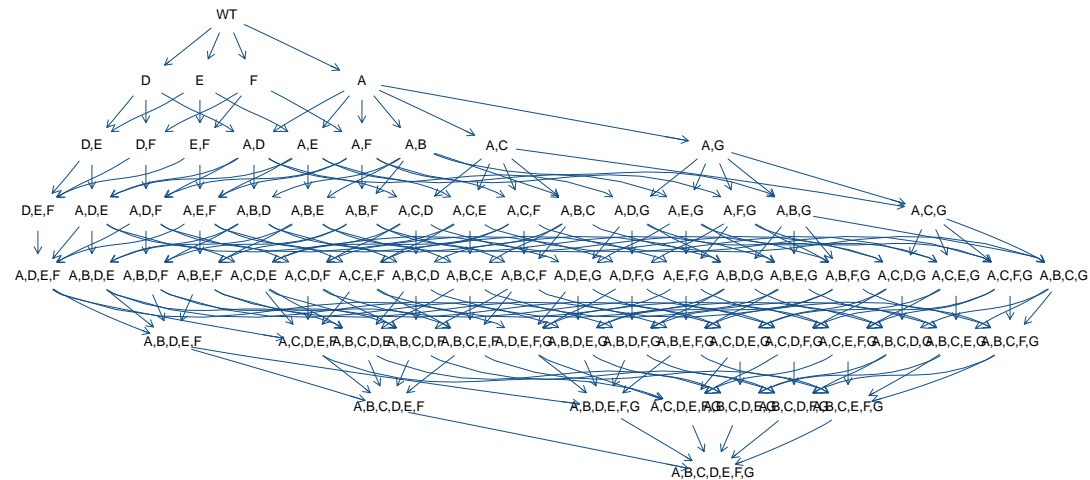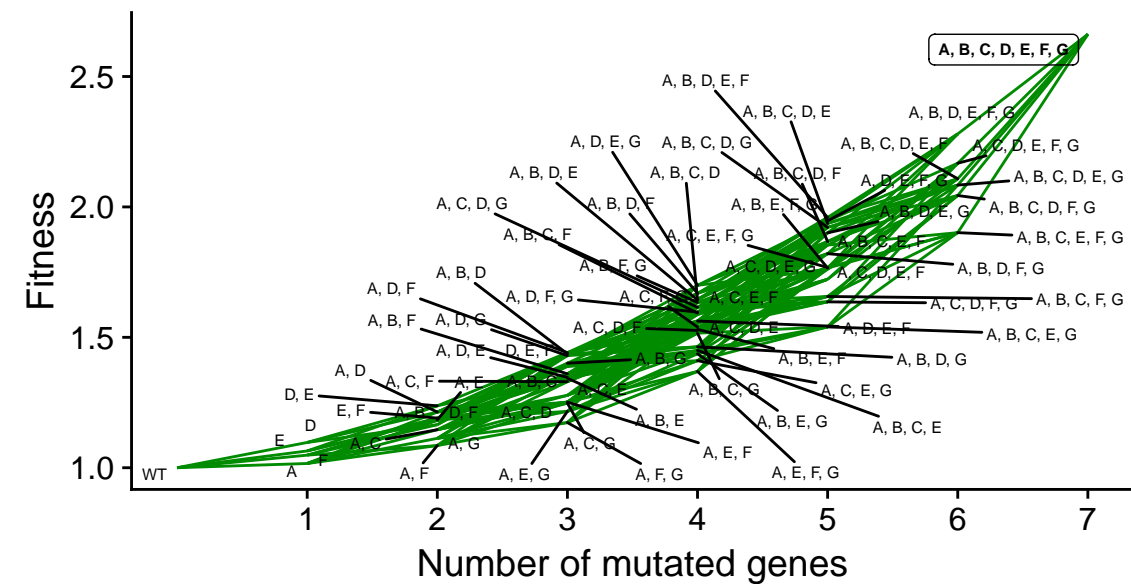

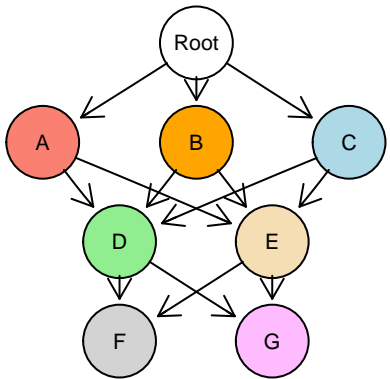

ID 9o10QUimqcWrPHbGH  
 acc genotypes 14  
 peaks no back 1  
 removed edges 0  
 prop rem edges 0

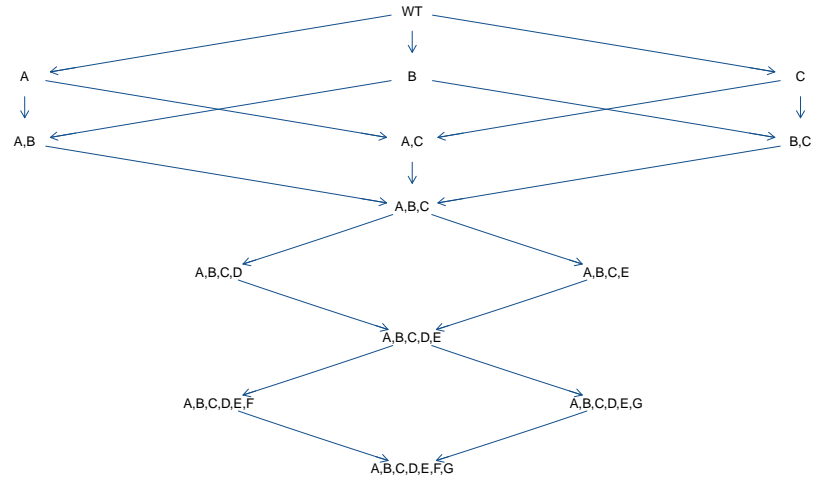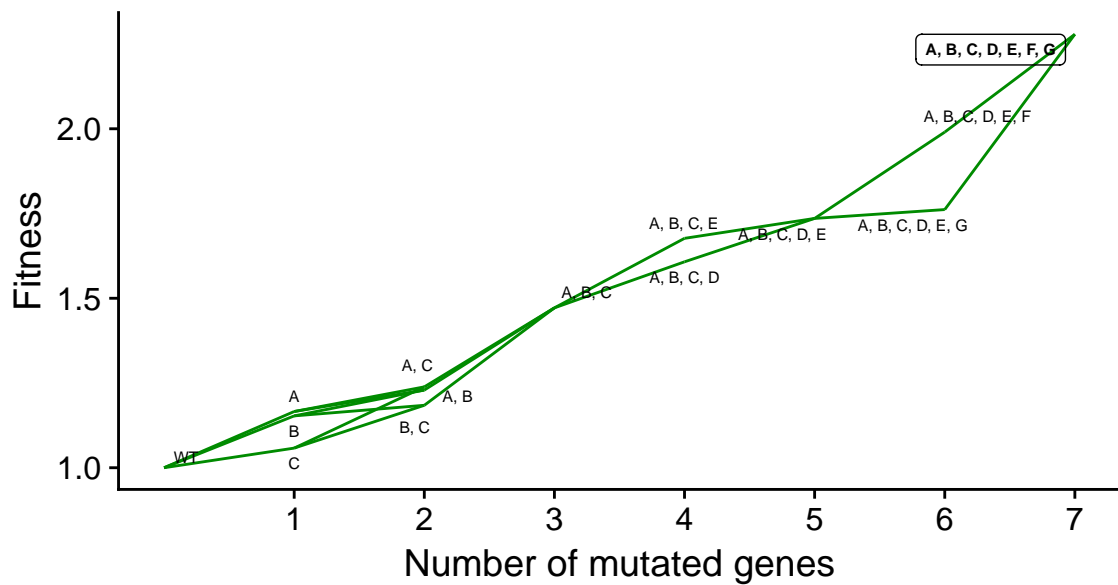

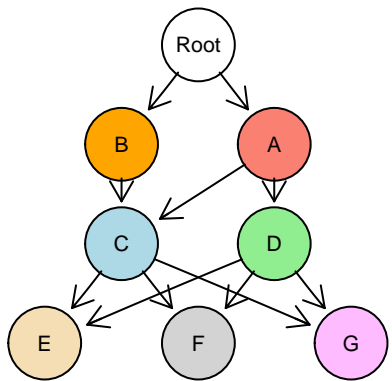

ID a2tStlNqtyWzD10eQ  
 acc genotypes 15  
 peaks no back 1  
 removed edges 0  
 prop rem edges 0

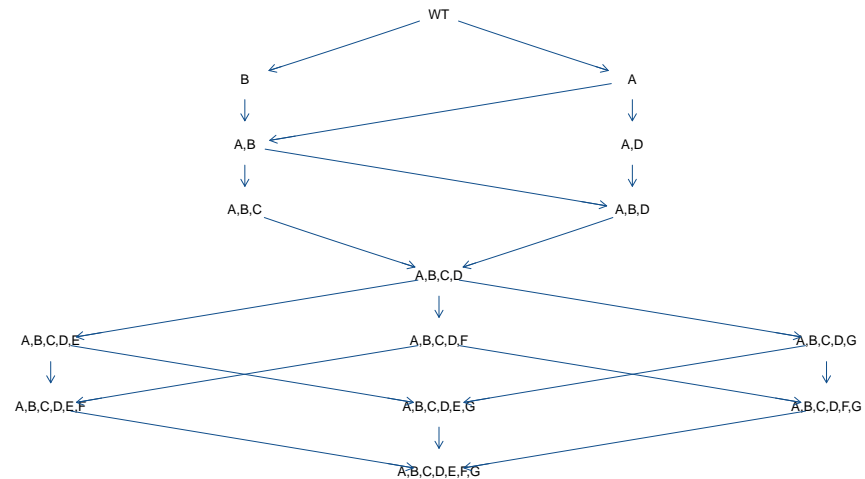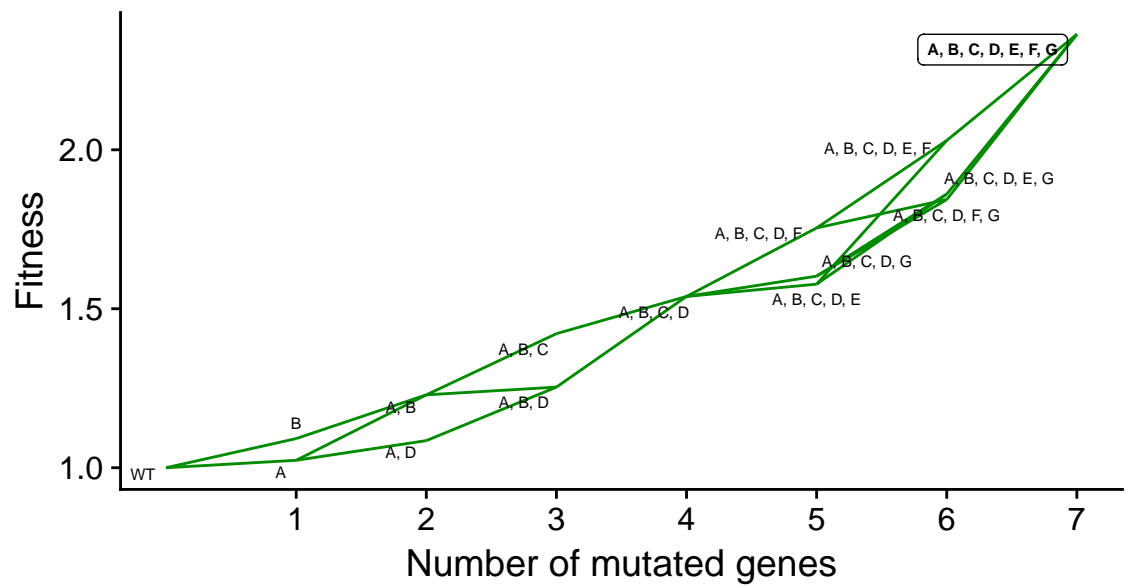

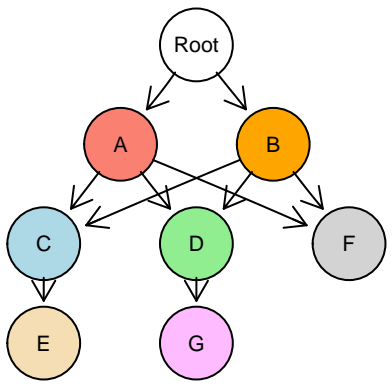

ID a7XZXptDjjWuSFhl  
 acc genotypes 21  
 peaks no back 1  
 removed edges 0  
 prop rem edges 0

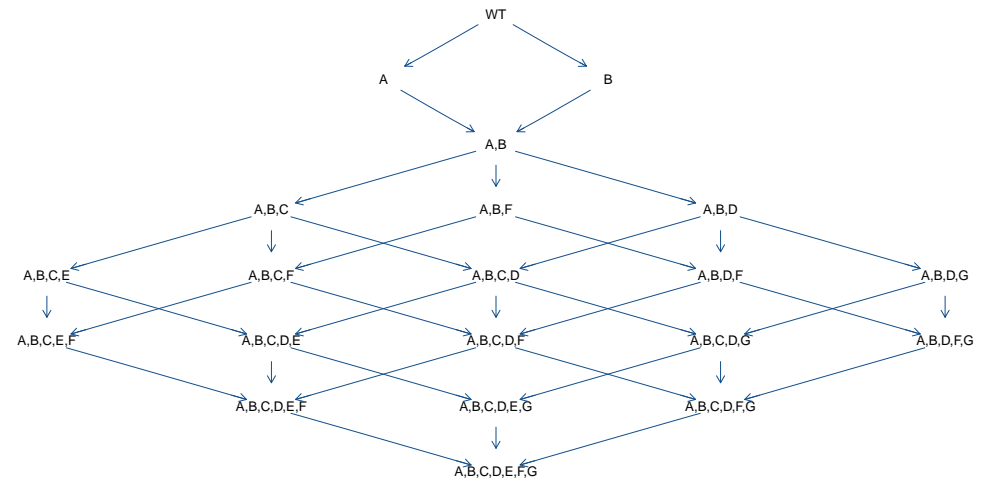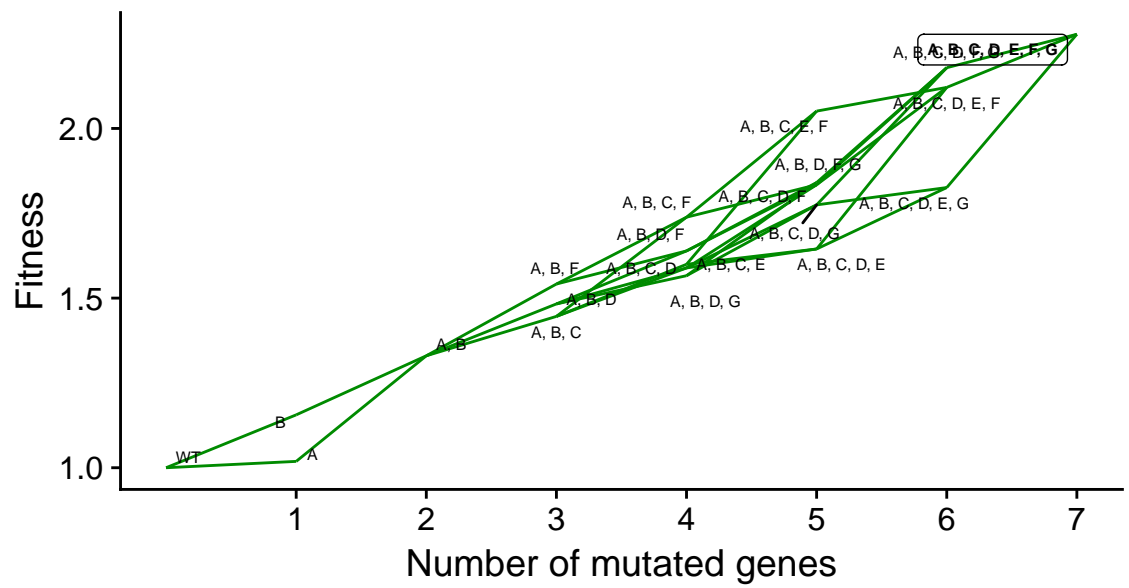

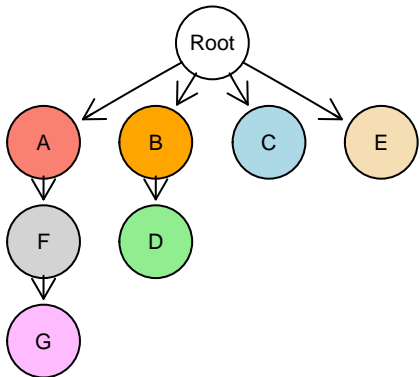

*ID* aGBVZkIQ4oOGxWTb  
*acc genotypes* 48  
*peaks no back* 1  
*removed edges* 0  
*prop rem edges* 0

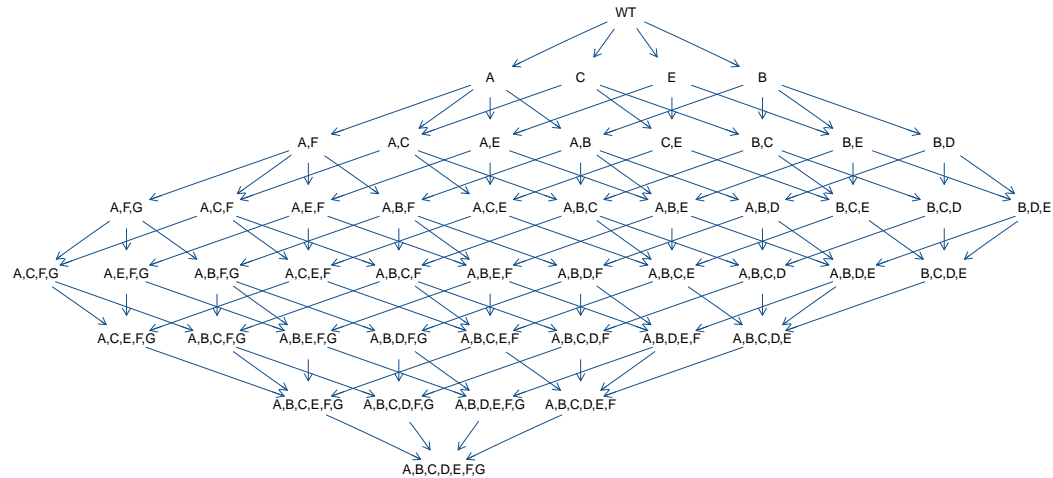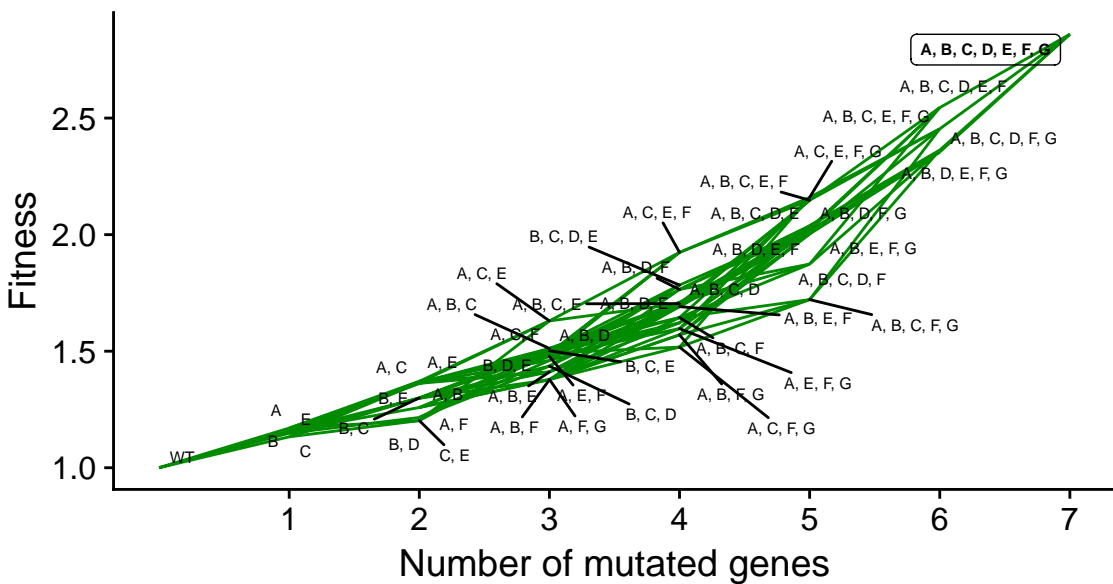

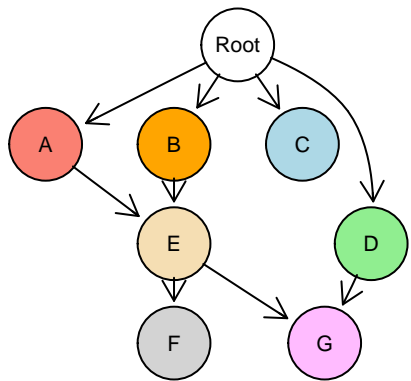

ID **AIBDGRuJ29dXk10wK**  
 acc genotypes **28**  
 peaks no back 1  
 removed edges 0  
 prop rem edges 0

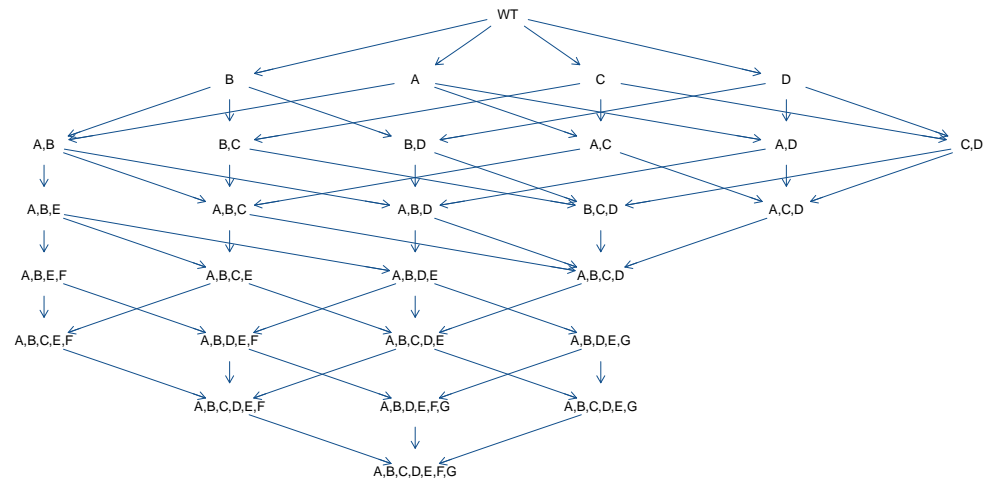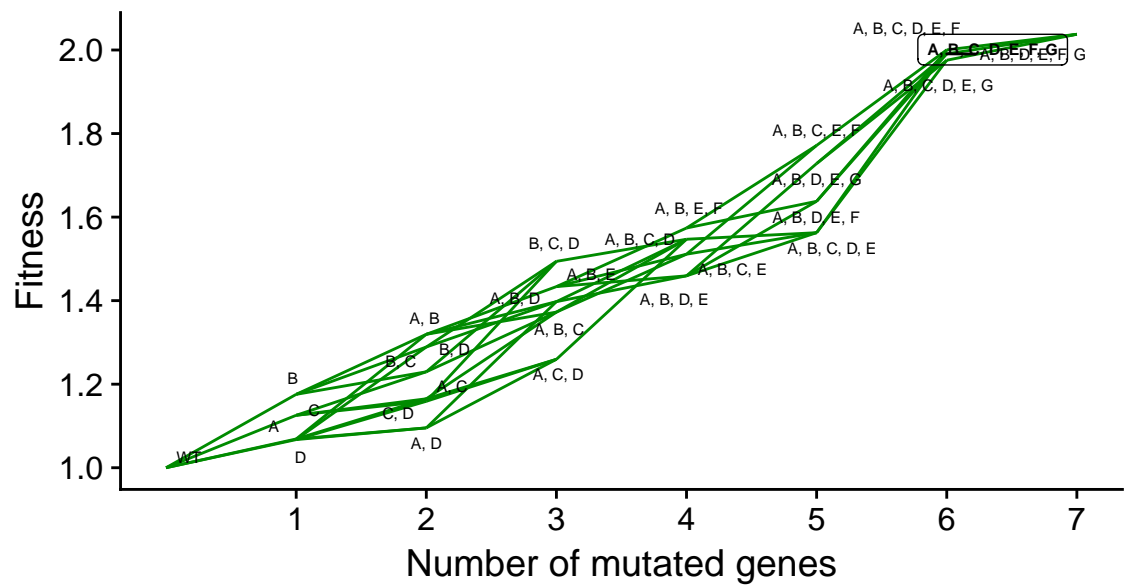



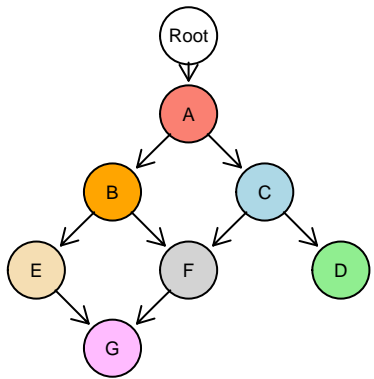

*ID* ALtLgLoV6JFZgc9s  
*acc genotypes* 16  
*peaks no back* 1  
*removed edges* 0  
*prop rem edges* 0

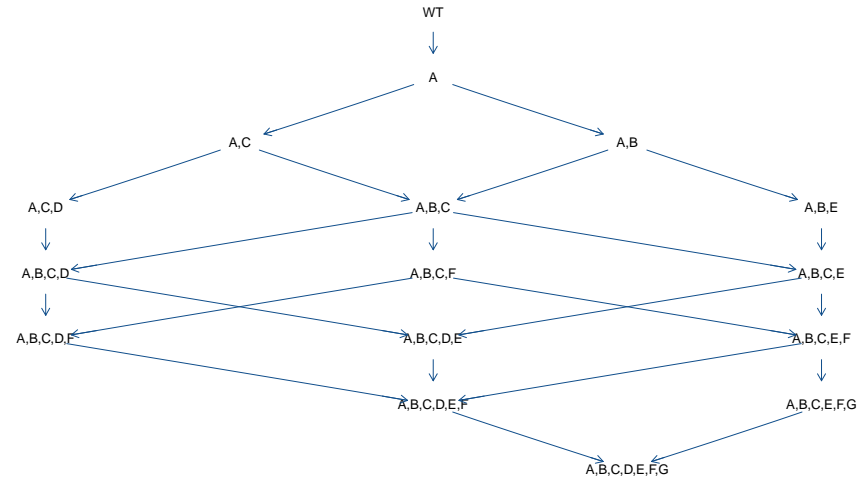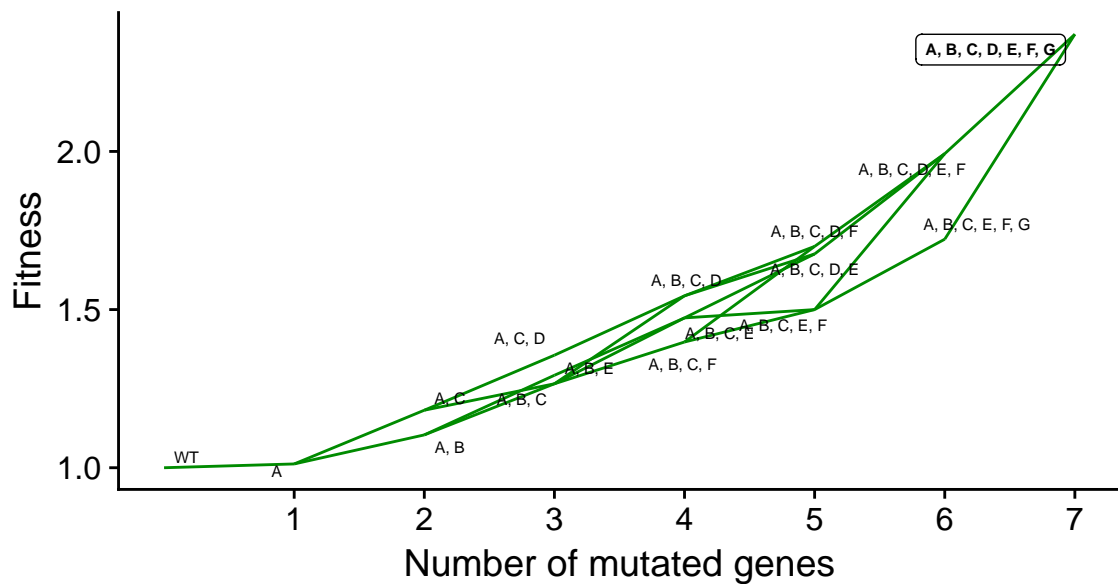

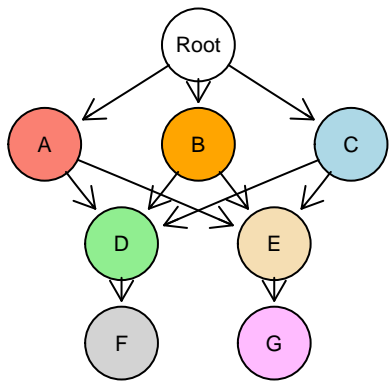

ID **AomkJD2bjXlfY6bL**  
 acc genotypes **16**  
 peaks no back 1  
 removed edges 0  
 prop rem edges 0

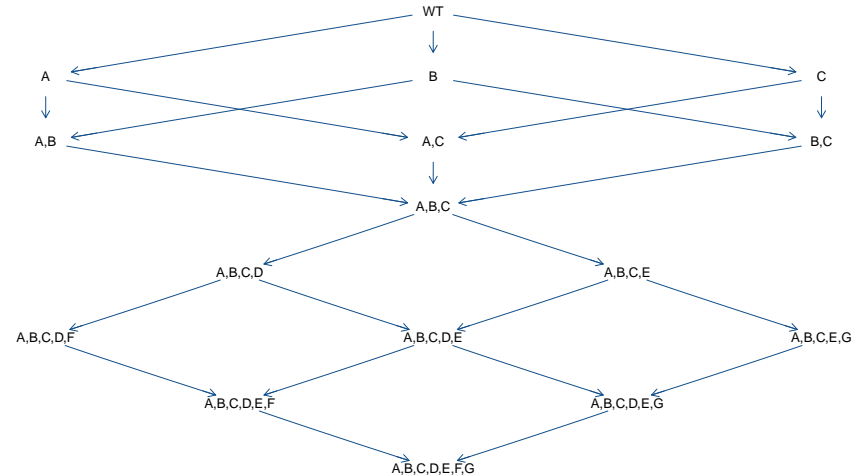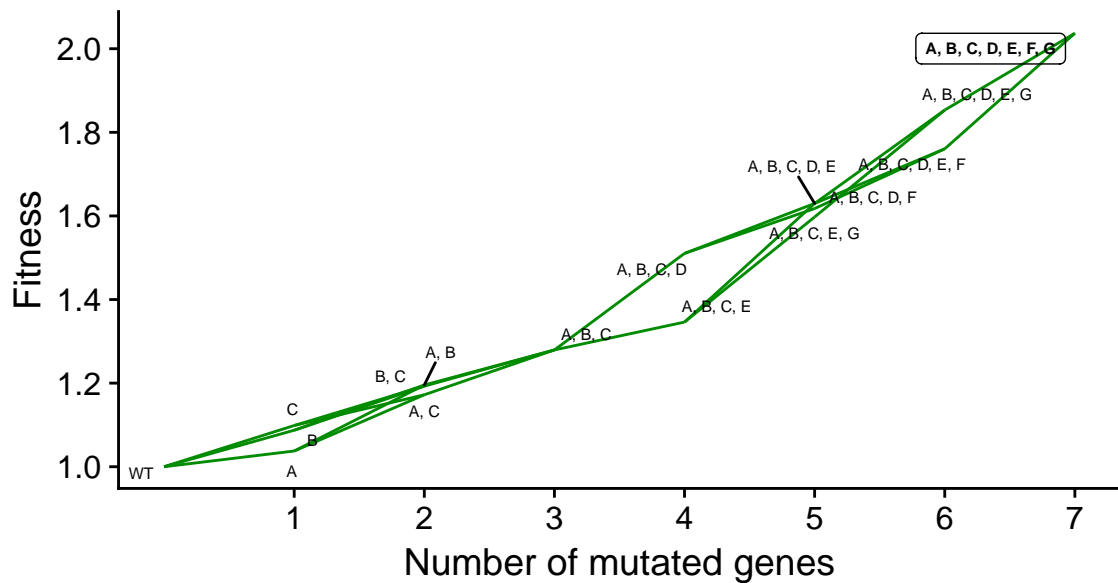

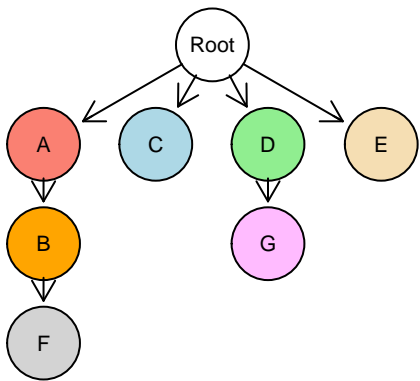

ID **AQcGRsclzSVWoU7Z**  
 acc genotypes **48**  
 peaks no back **1**  
 removed edges **0**  
 prop rem edges **0**

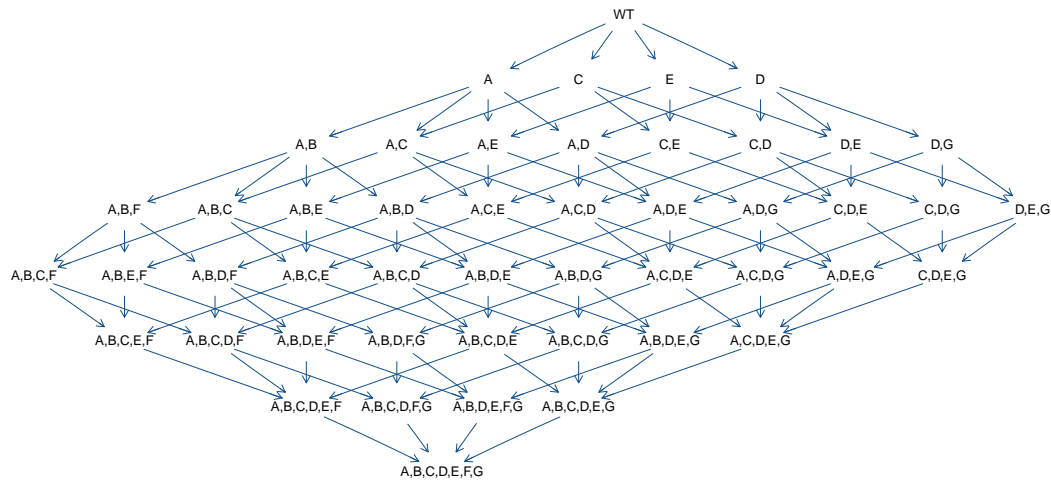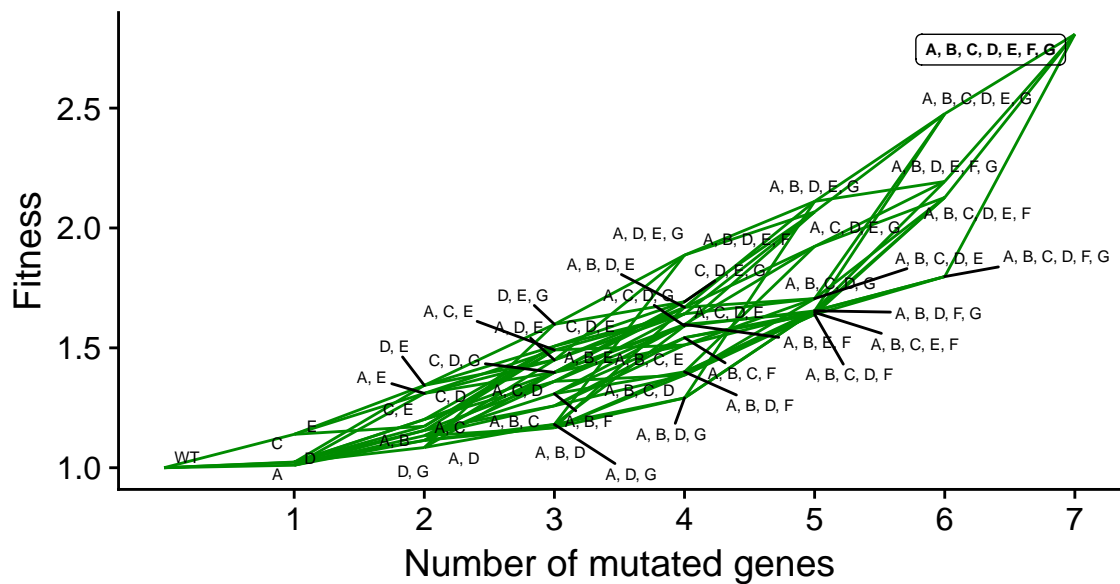

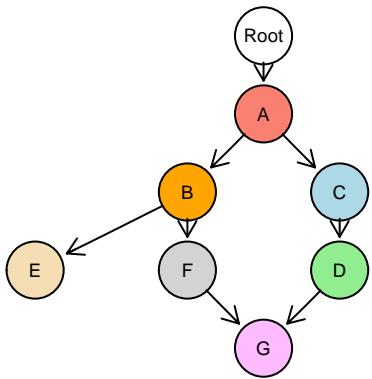

ID [Azj8j6q13euWbW53](#)  
 acc genotypes **18**  
 peaks no back 1  
 removed edges 0  
 prop rem edges 0

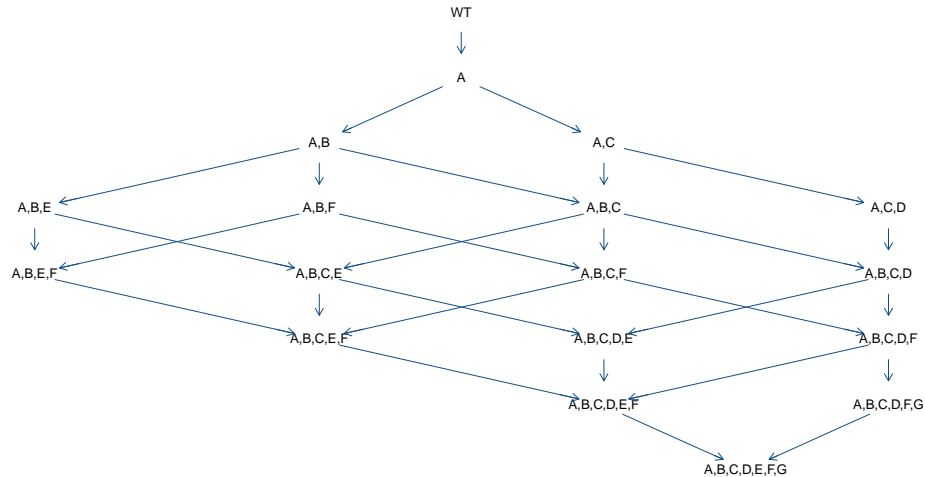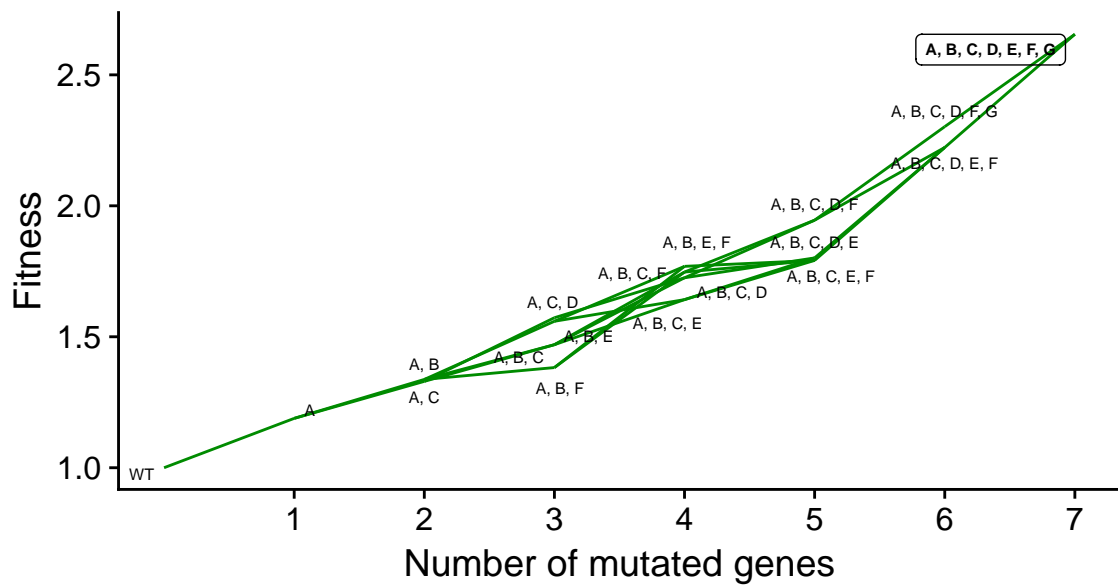

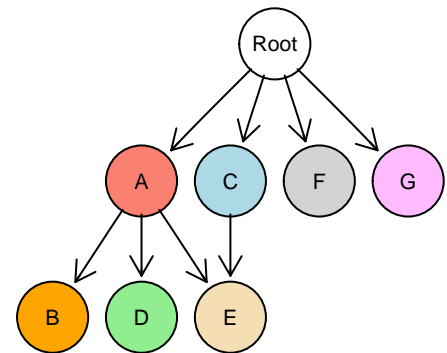

ID B3I8D10NQwXKC9sLs  
 acc genotypes 56  
 peaks no back 1  
 removed edges 0  
 prop rem edges 0

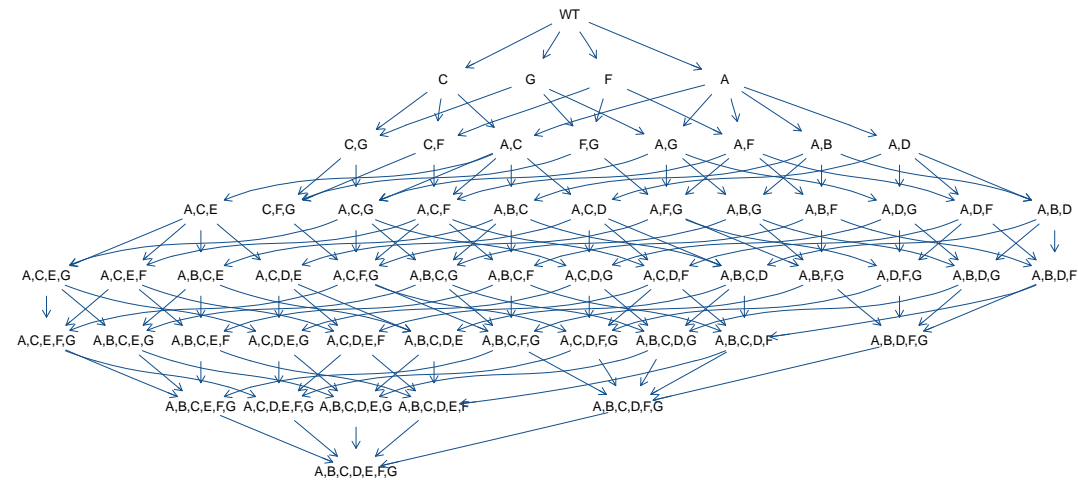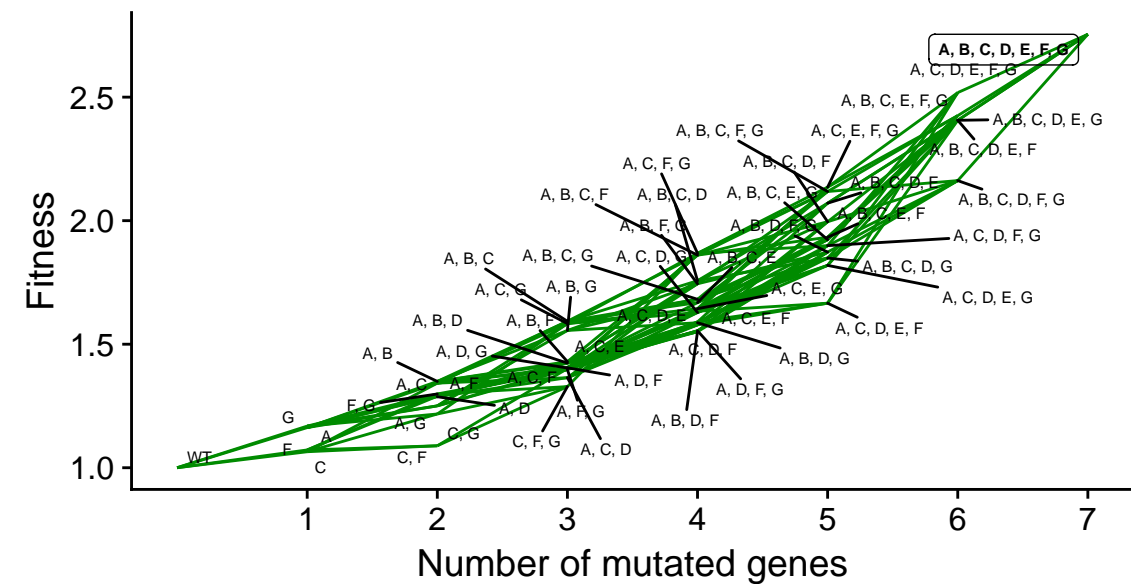

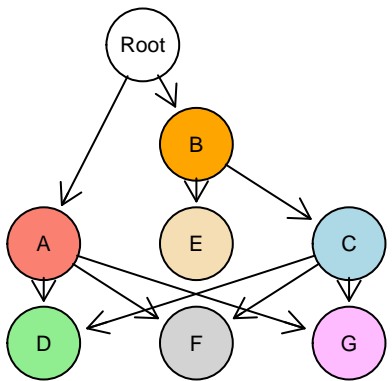

ID **BawvXOS7sG8kOijC**  
 acc genotypes **24**  
 peaks no back 1  
 removed edges 0  
 prop rem edges 0

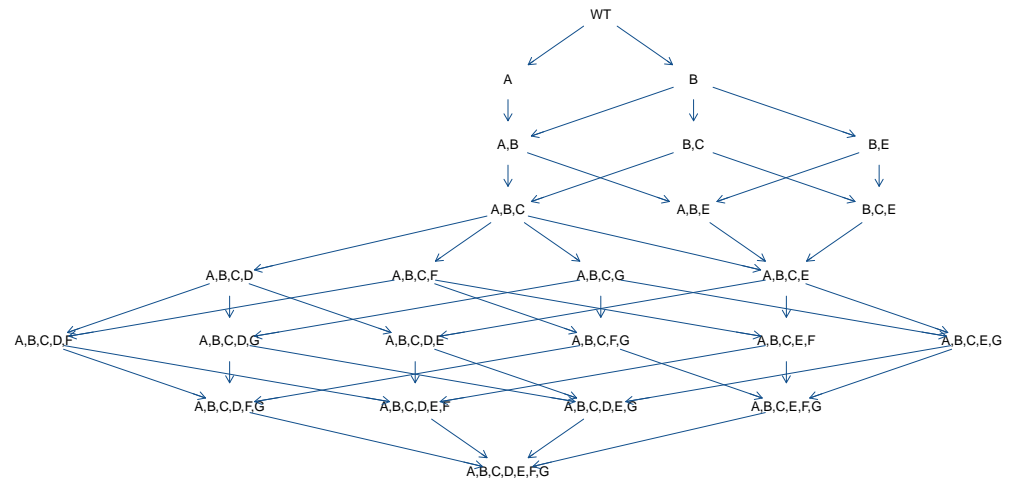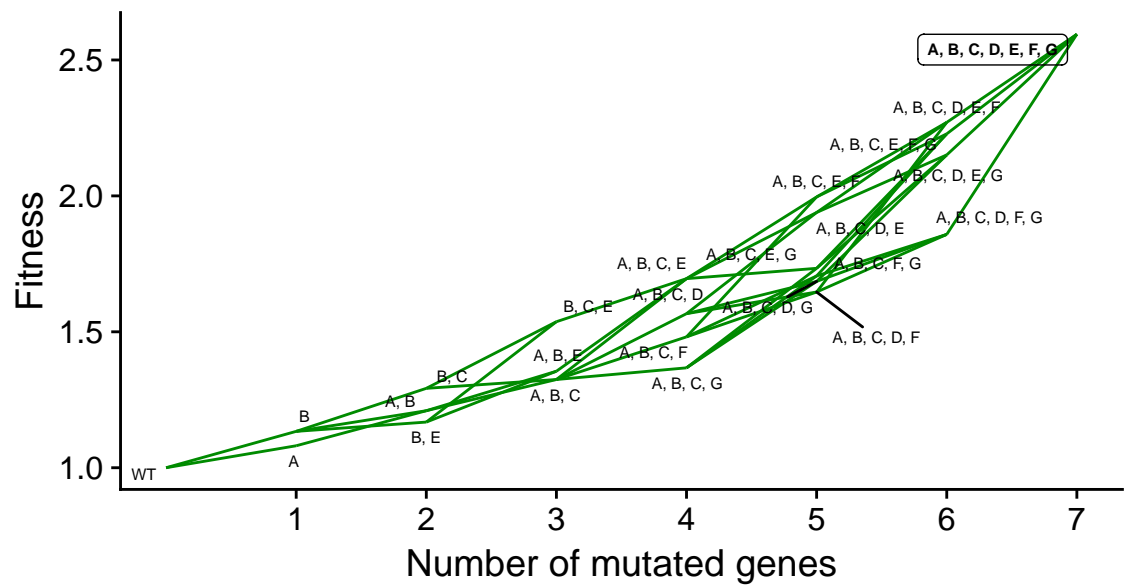

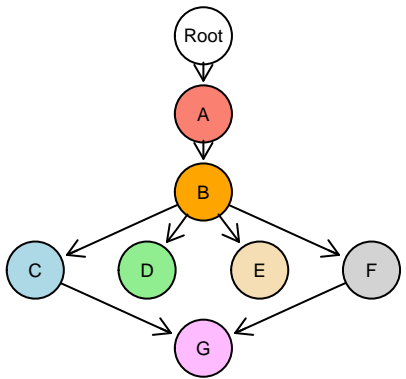

*ID* BFEIrfle1os3fm18  
*acc genotypes* 22  
*peaks no back* 1  
*removed edges* 0  
*prop rem edges* 0

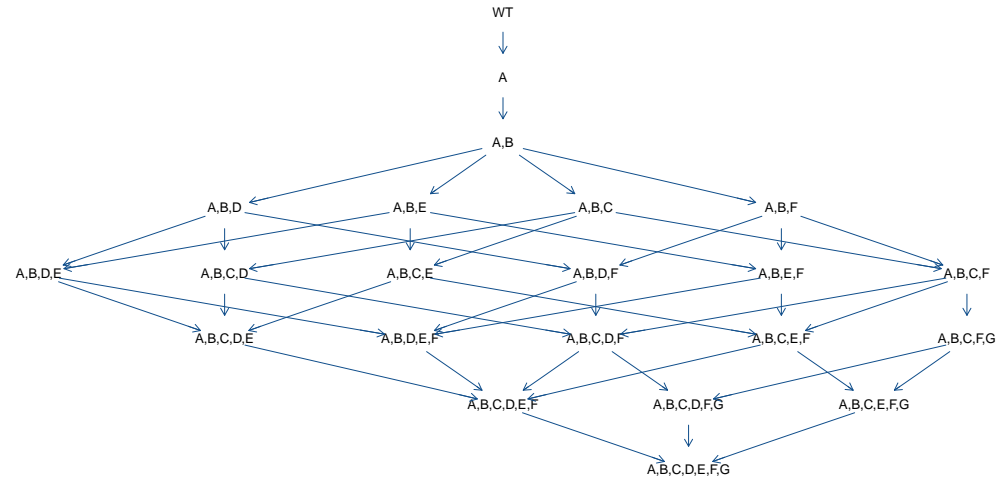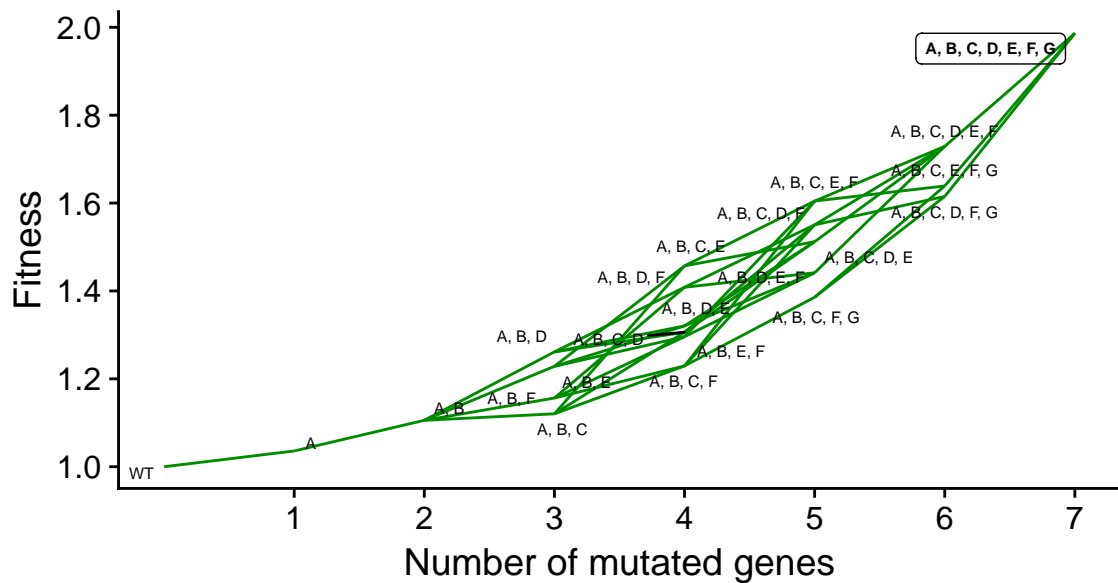

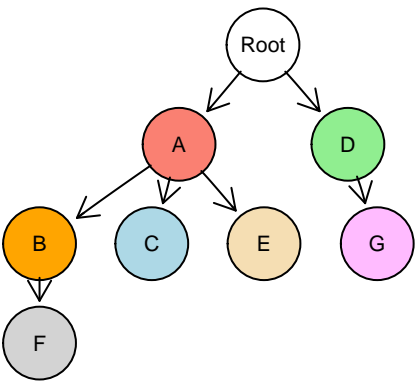

ID **bFmYC2KrBktypLw3**  
 acc genotypes **39**  
 peaks no back **1**  
 removed edges **0**  
 prop rem edges **0**

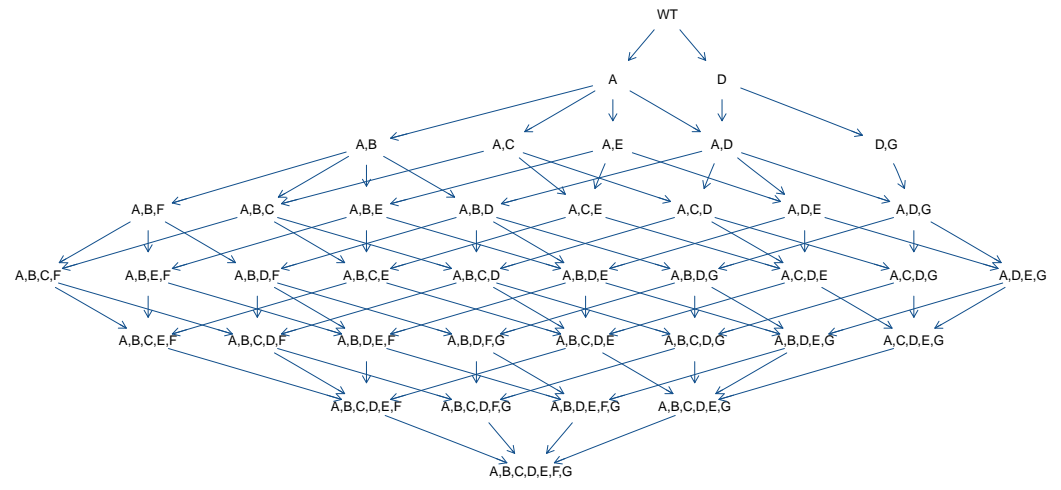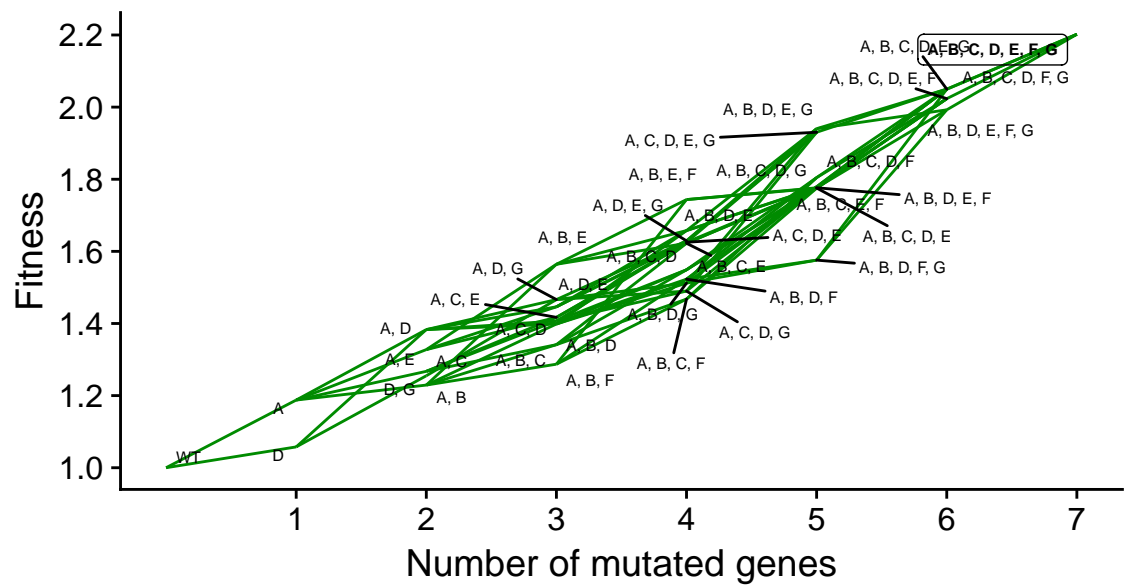



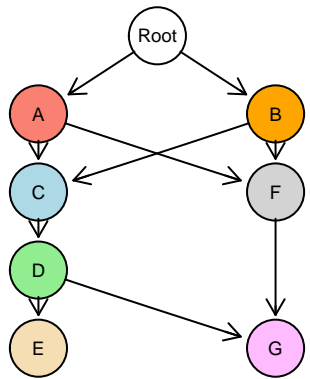

*ID* BfsxwvogFr6VDw4S  
*acc genotypes* 13  
*peaks no back* 1  
*removed edges* 0  
*prop rem edges* 0

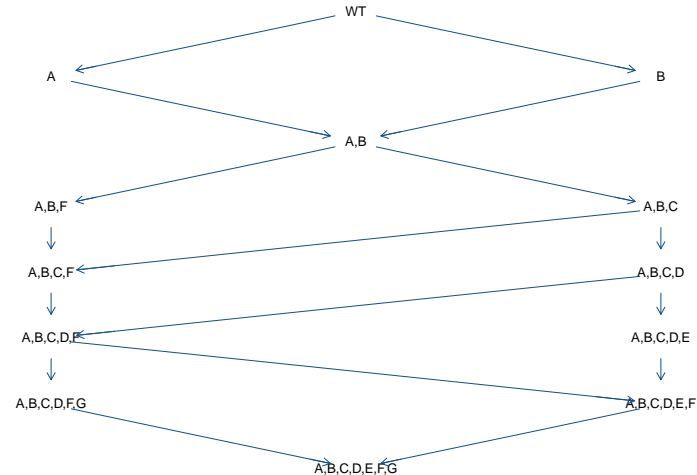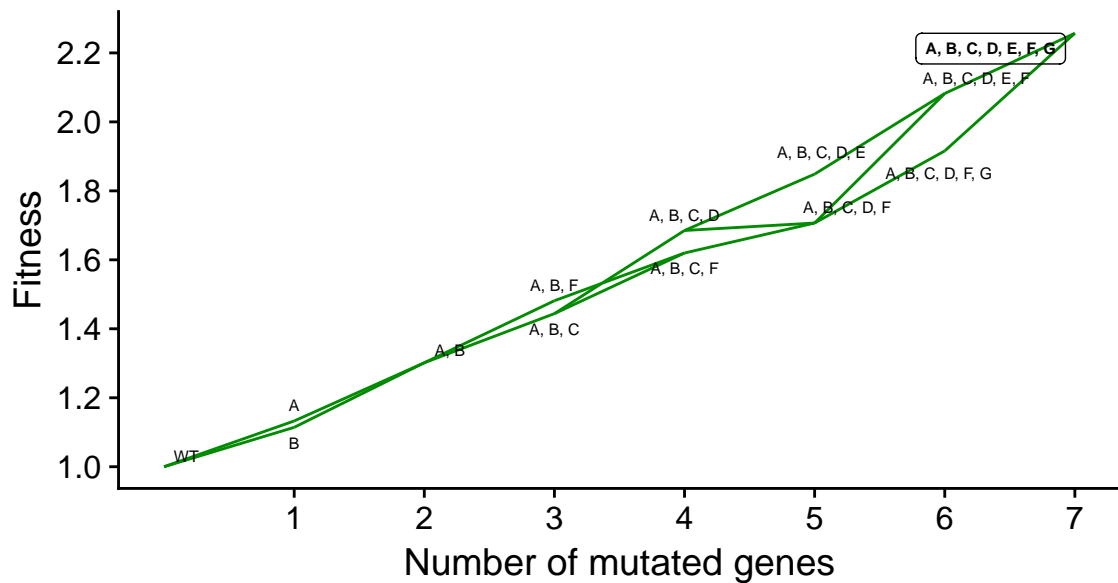

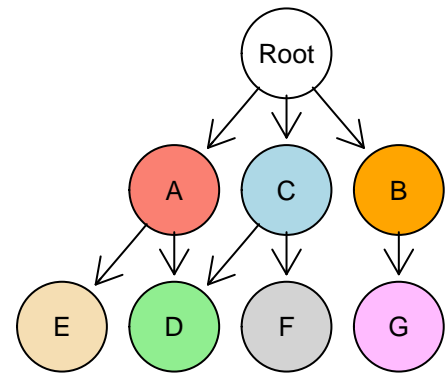

ID **bJl9ffVcPbF6GUJl**  
 acc genotypes **39**  
 peaks no back **1**  
 removed edges **0**  
 prop rem edges **0**

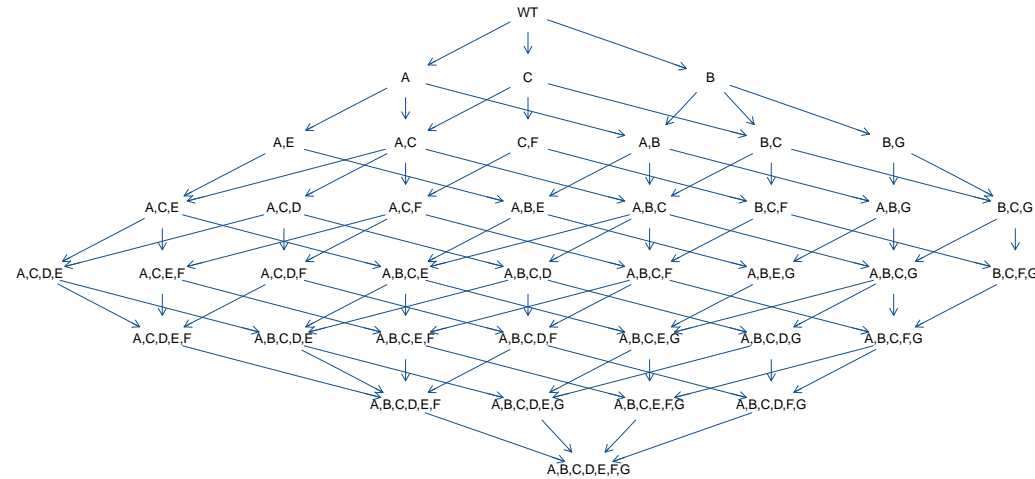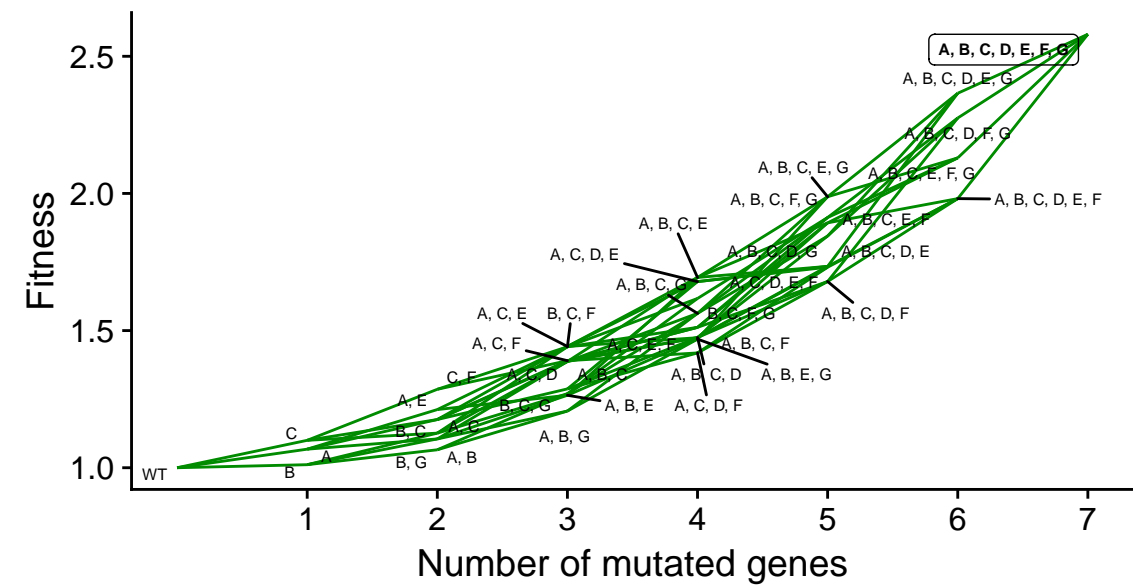

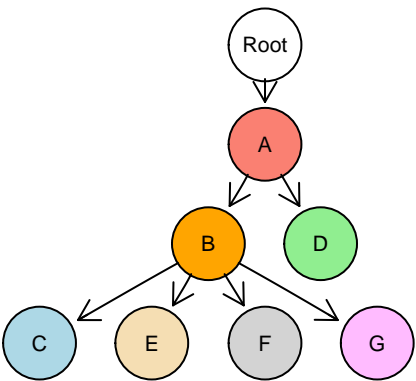

ID **bqjCnNng38uQA10Y**  
 acc genotypes **35**  
 peaks no back **1**  
 removed edges **0**  
 prop rem edges **0**

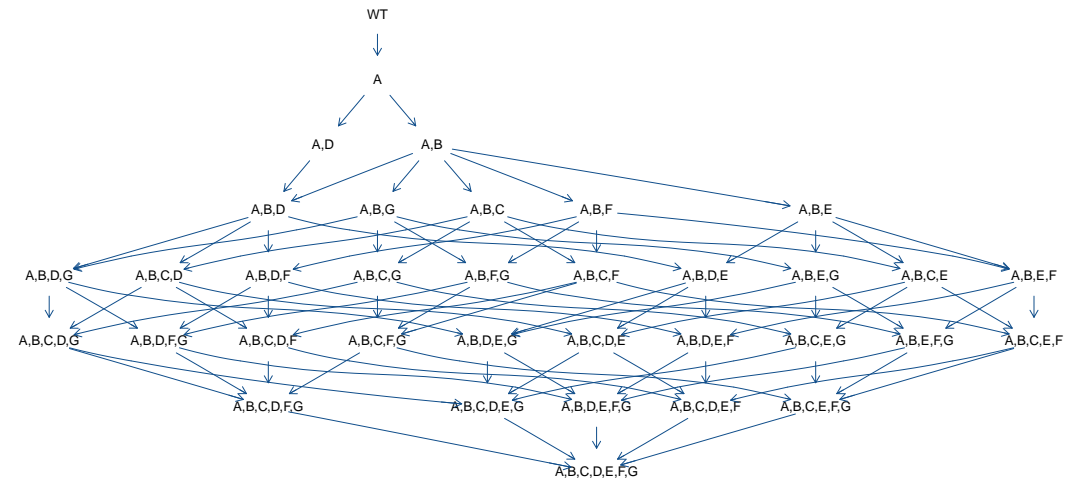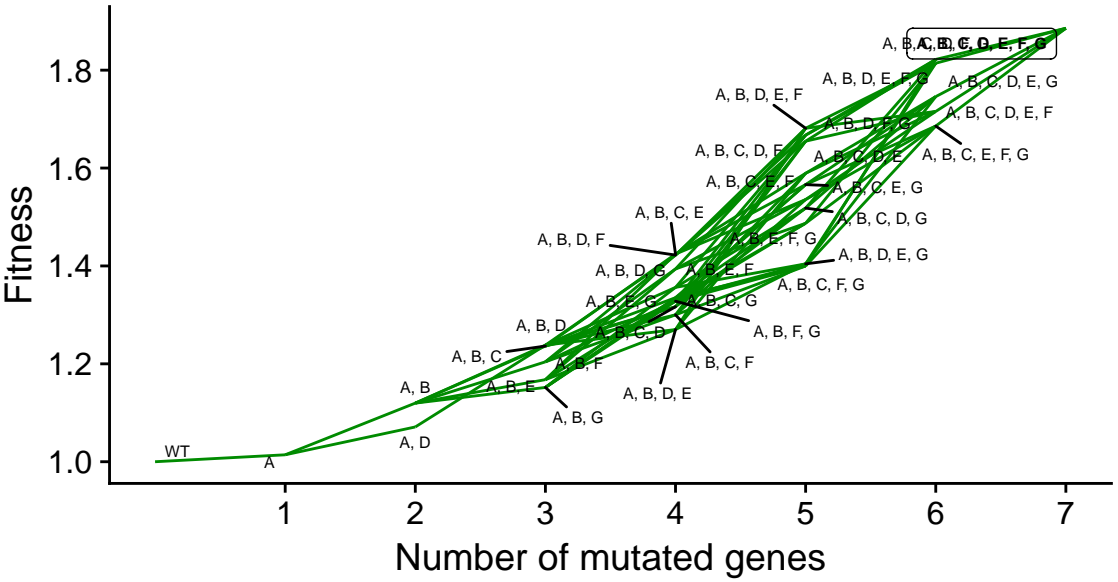

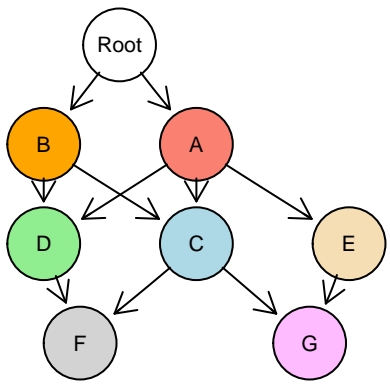

*ID*    **btsq9bPlvHef8E4b**  
*acc genotypes*    **17**  
*peaks no back*    1  
*removed edges*    0  
*prop rem edges*    0

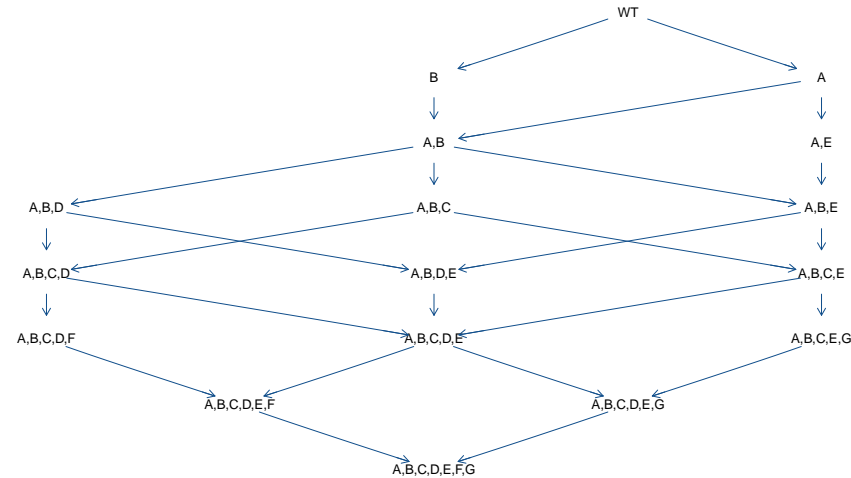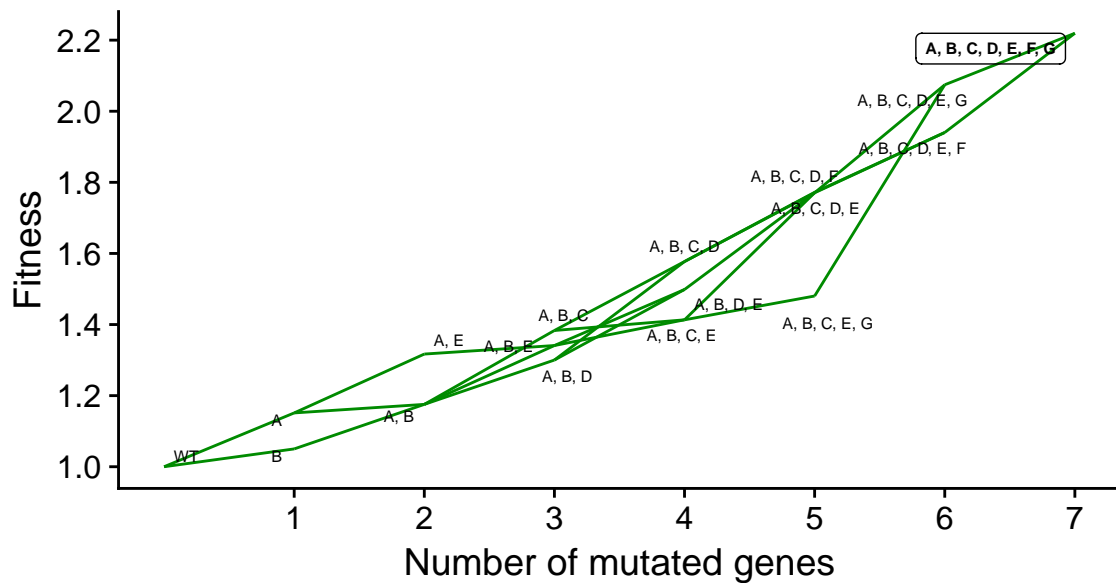



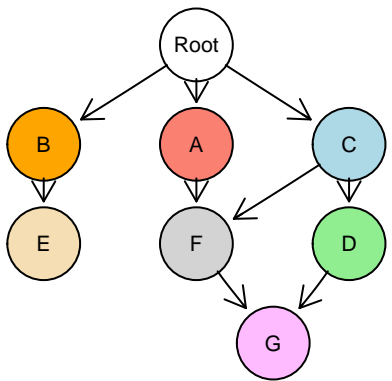

*ID* cPY2aEYEnXRtcOVx  
*acc genotypes* 27  
*peaks no back* 1  
*removed edges* 0  
*prop rem edges* 0

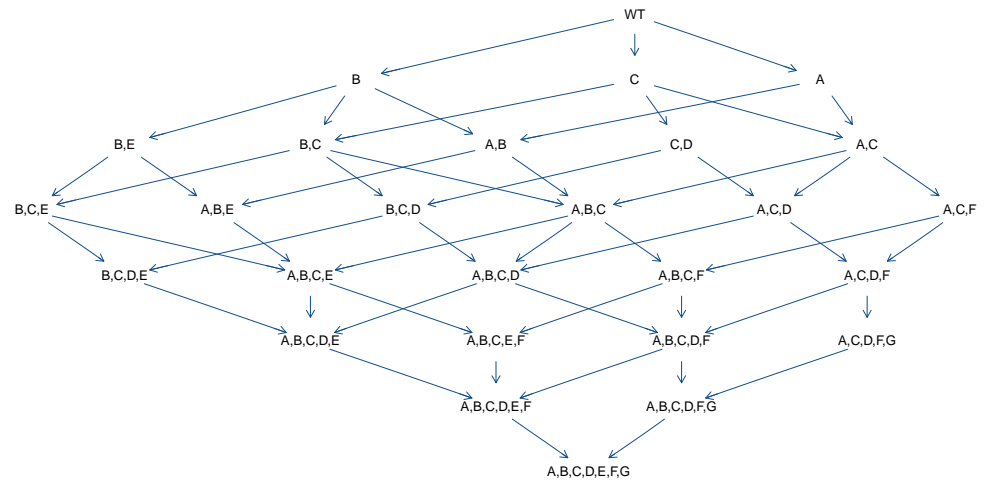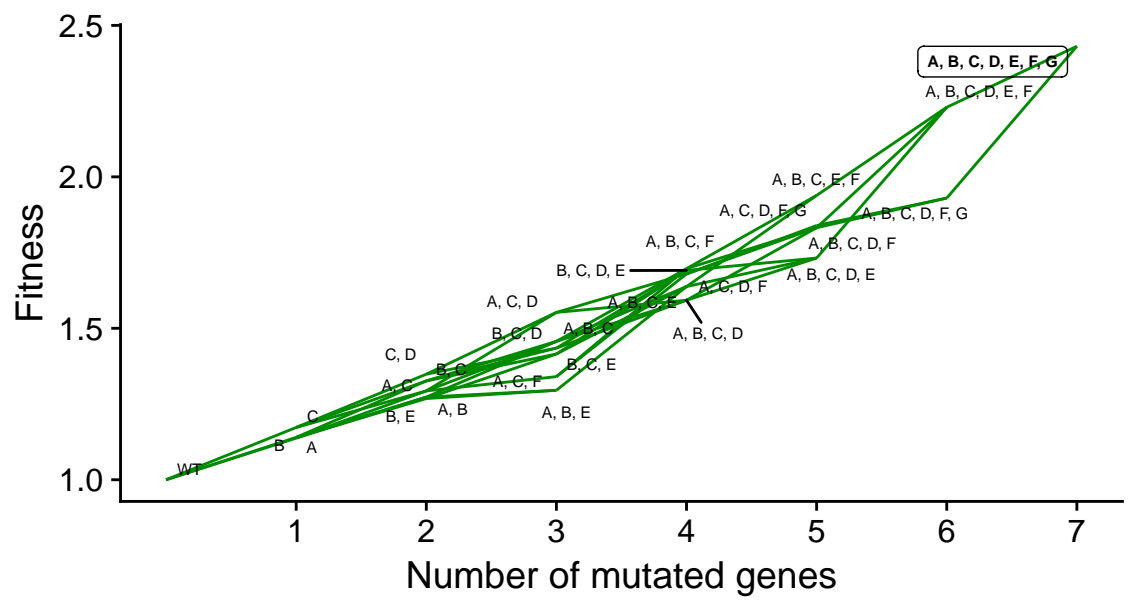

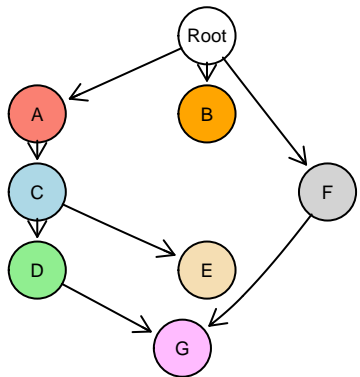

ID cTShsHTaSM2pFU3Z  
 acc genotypes 28  
 peaks no back 1  
 removed edges 0  
 prop rem edges 0

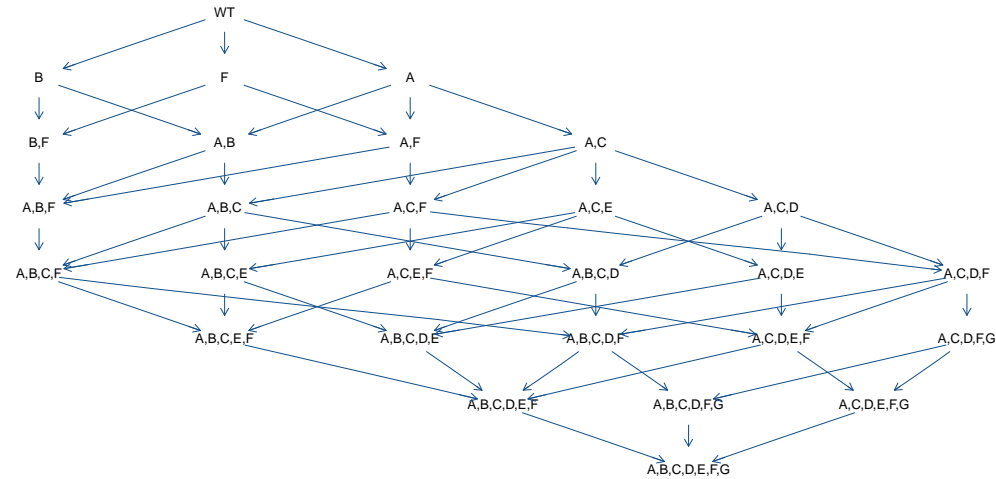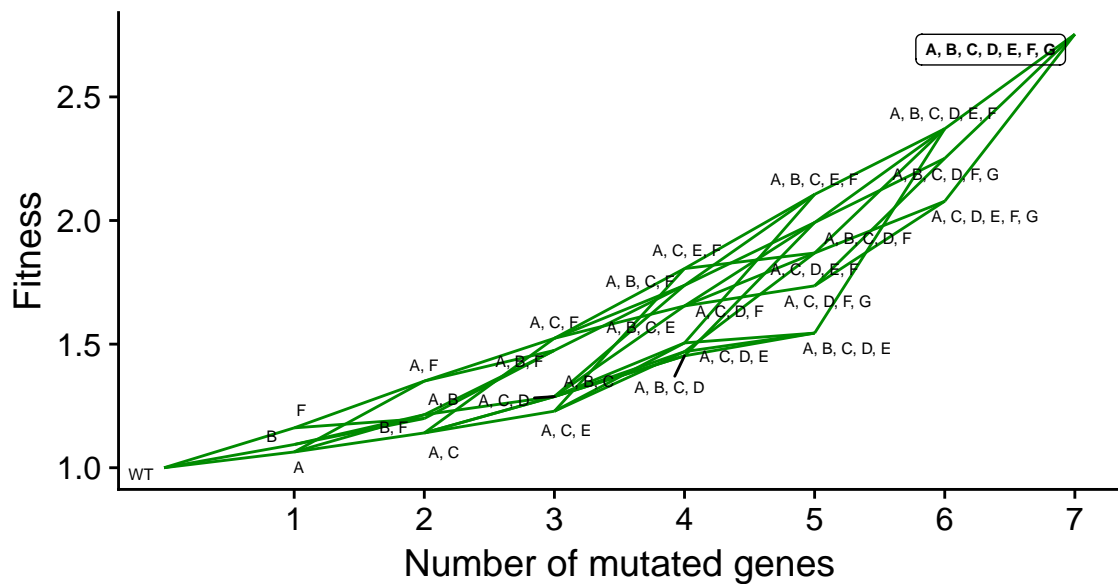

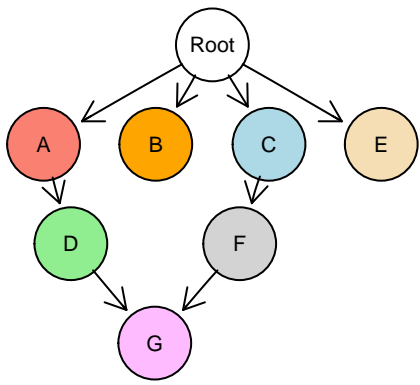

ID **cZ5tgt8lsWr92l8O**  
 acc genotypes **40**  
 peaks no back 1  
 removed edges 0  
 prop rem edges 0

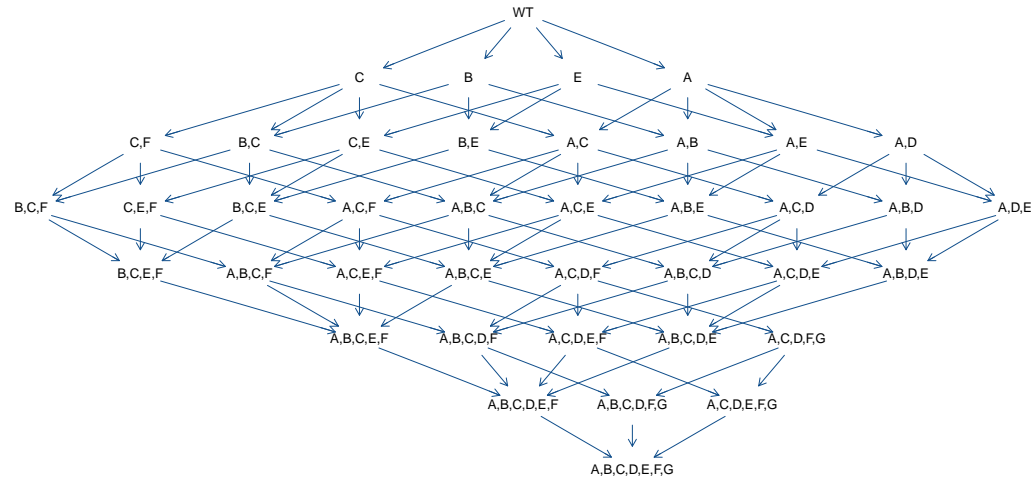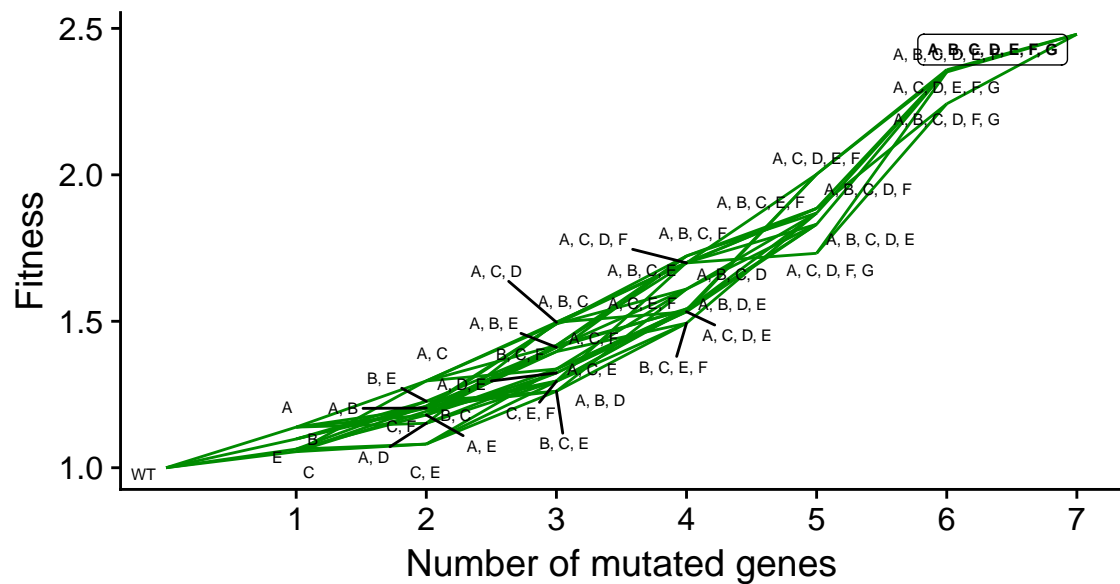



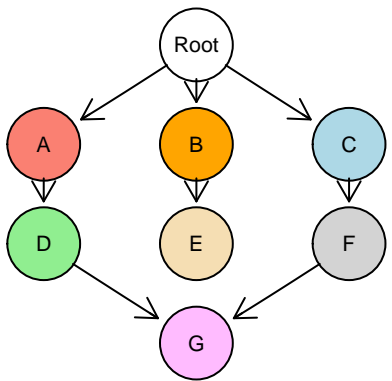

*ID* D10upTTNDLyeed8b9  
*acc genotypes* 30  
*peaks no back* 1  
*removed edges* 0  
*prop rem edges* 0

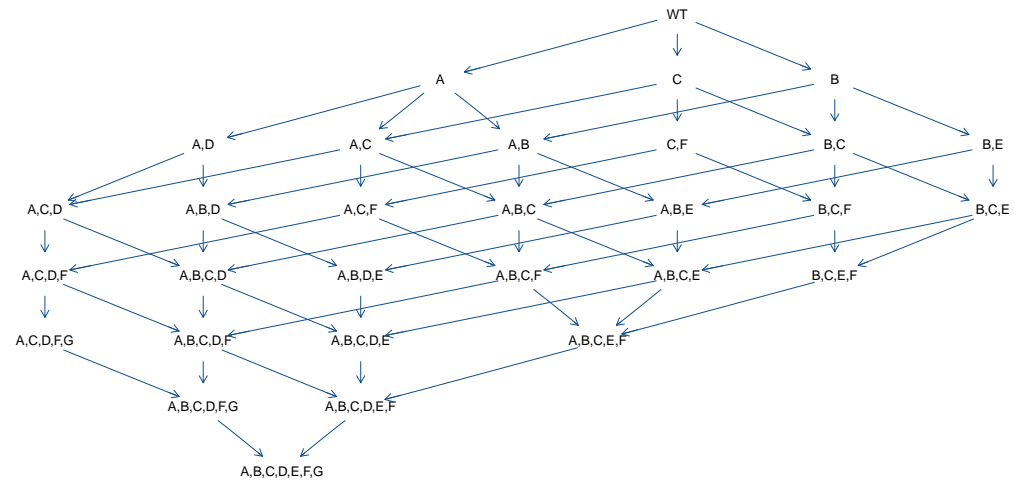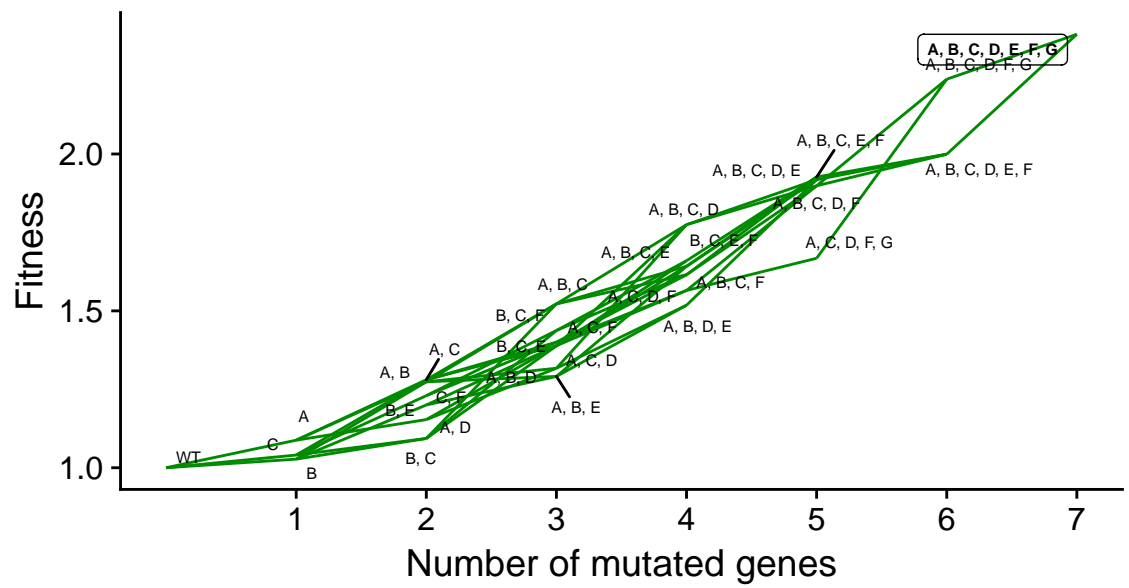

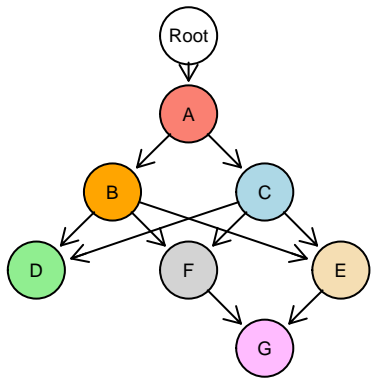

ID DaQ1IMqJ1ktP10uHB  
 acc genotypes 14  
 peaks no back 1  
 removed edges 0  
 prop rem edges 0

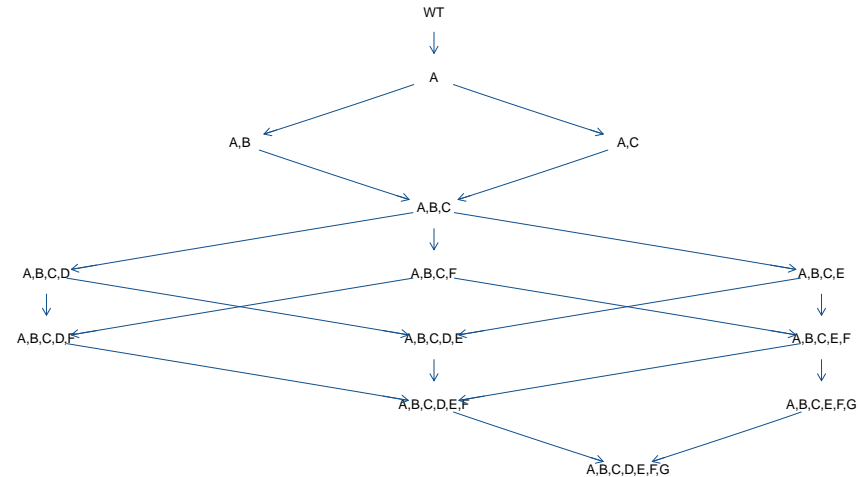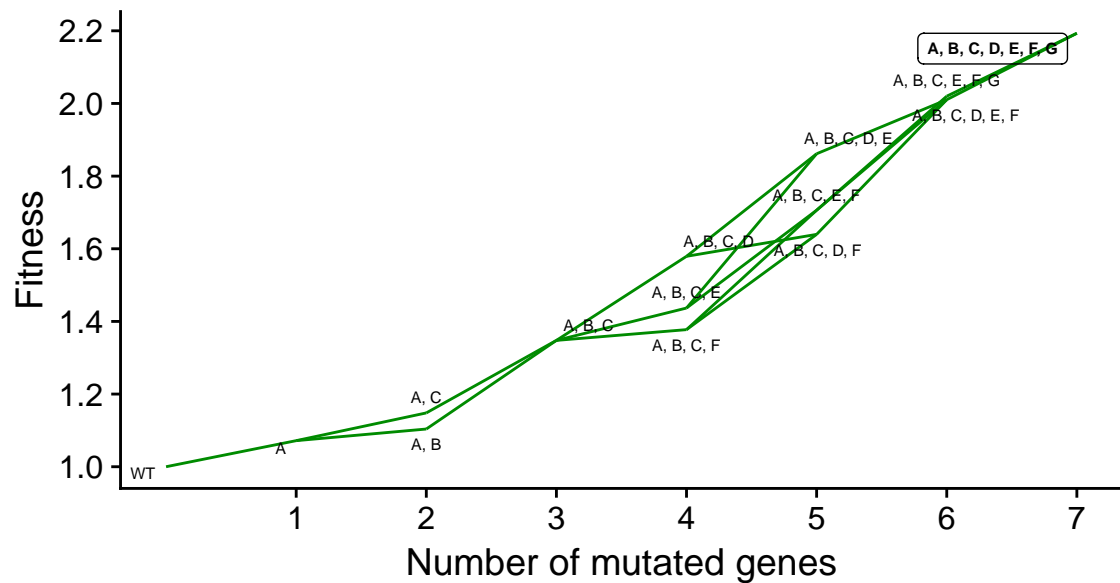

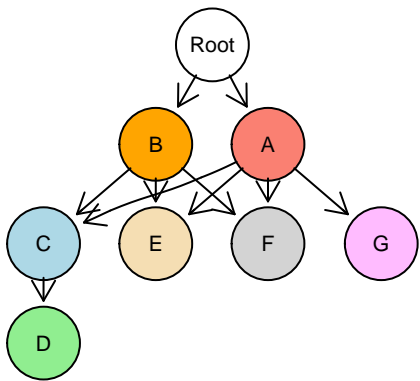

ID **dG5EKqdkRRReFI4LP**  
 acc genotypes **28**  
 peaks no back **1**  
 removed edges **0**  
 prop rem edges **0**

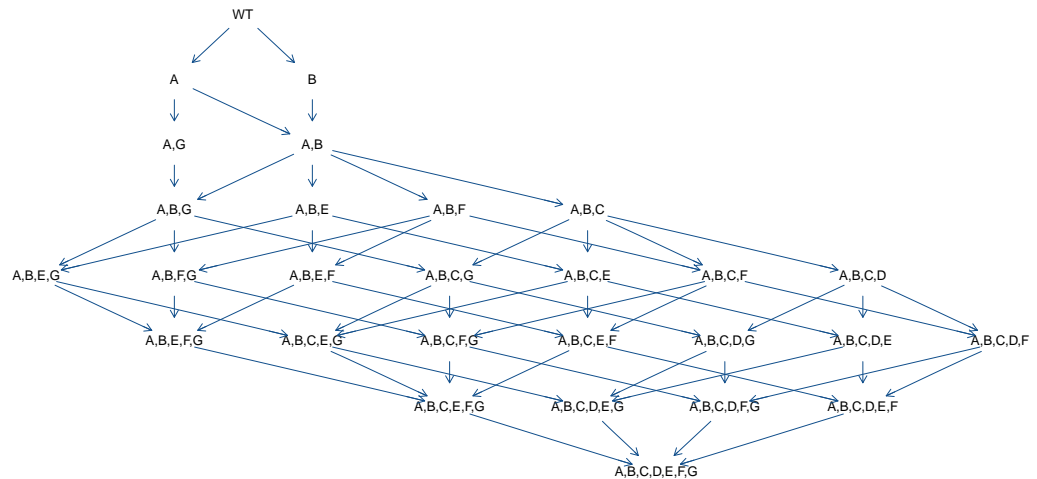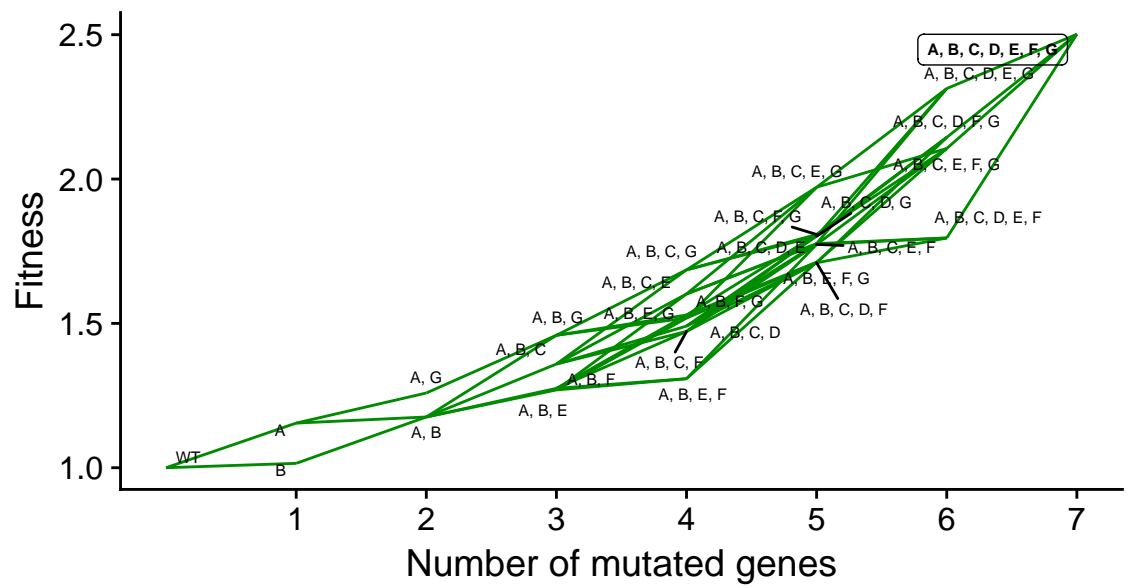

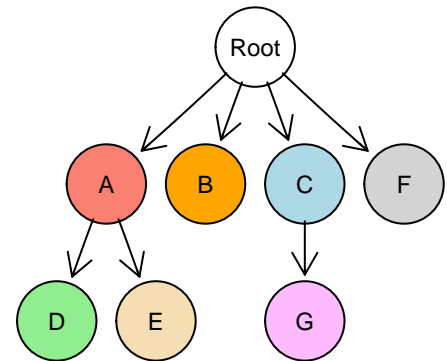

ID **DMEr7pbZBAcNnQg**  
 acc genotypes **60**  
 peaks no back **1**  
 removed edges **0**  
 prop rem edges **0**

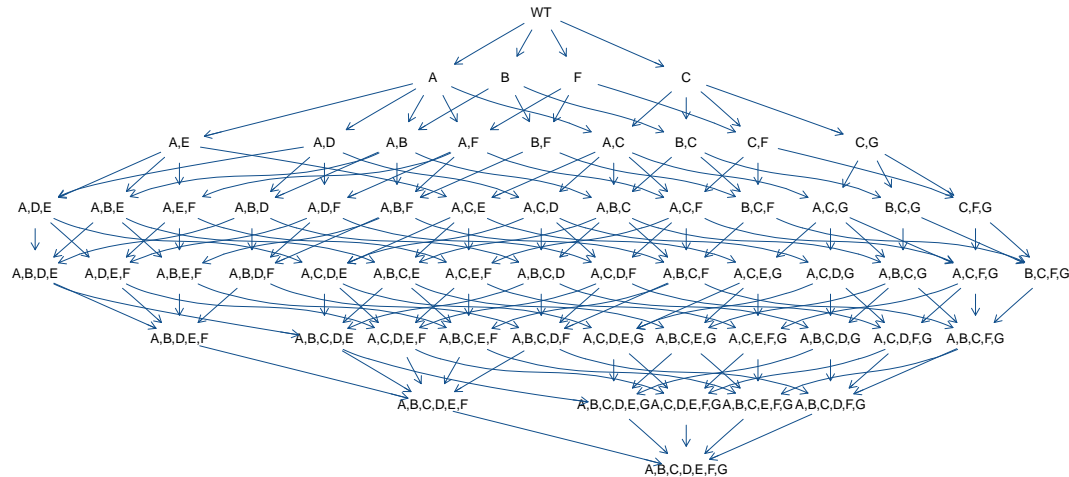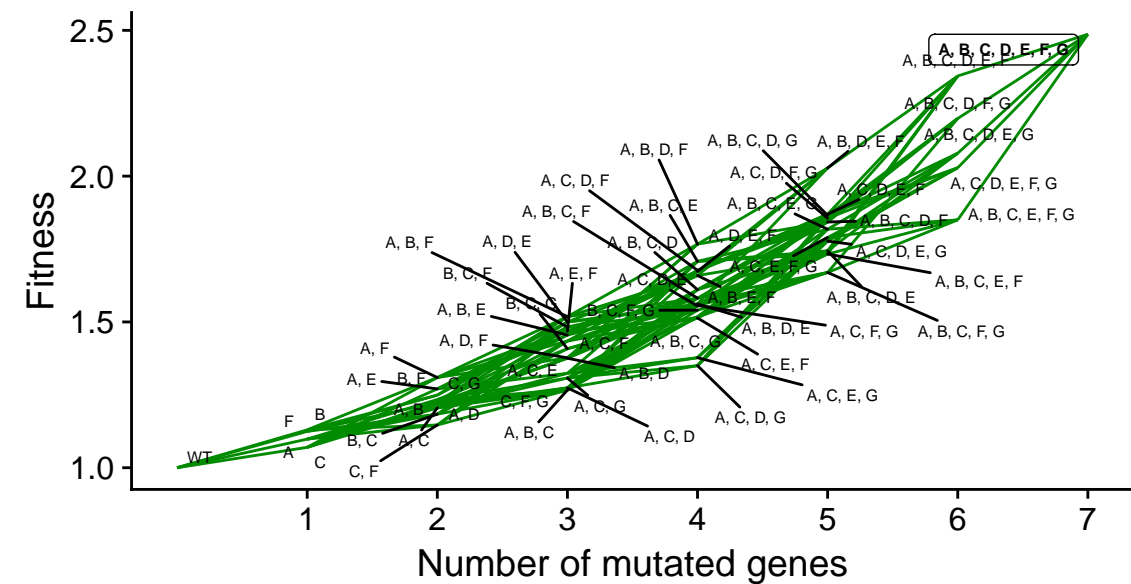

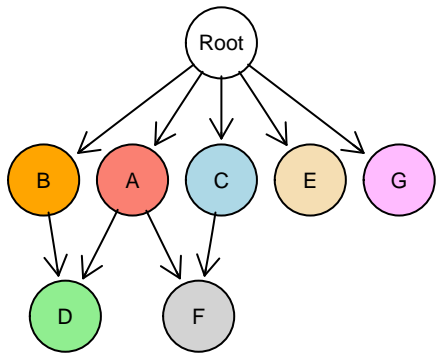

*ID* dmZHV2wAZ3zFiHOq  
*acc genotypes* 52  
*peaks no back* 1  
*removed edges* 0  
*prop rem edges* 0

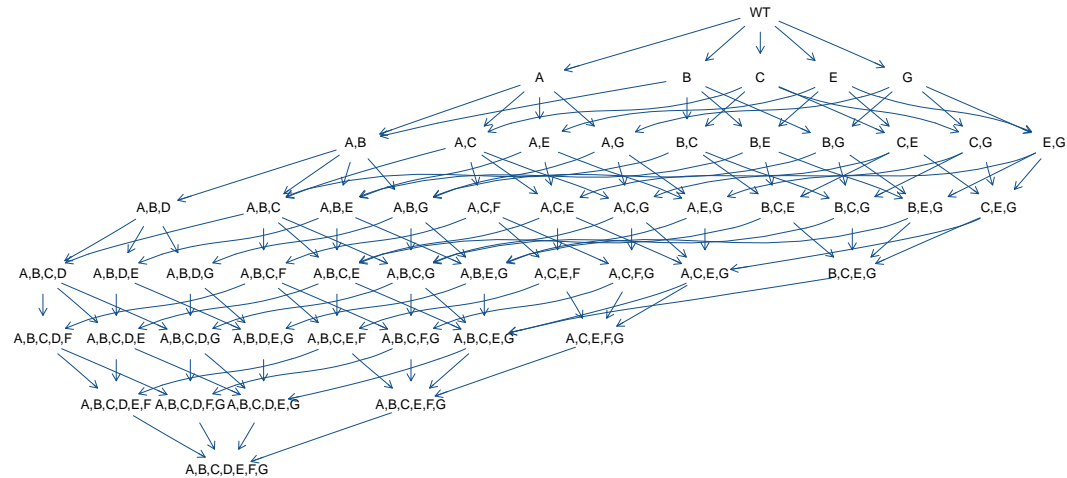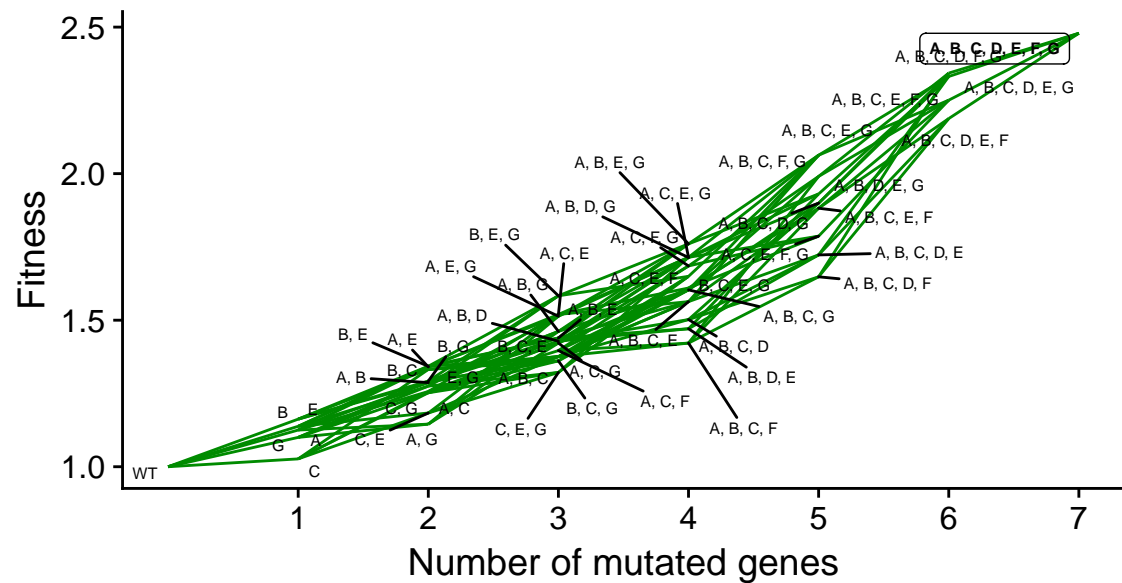

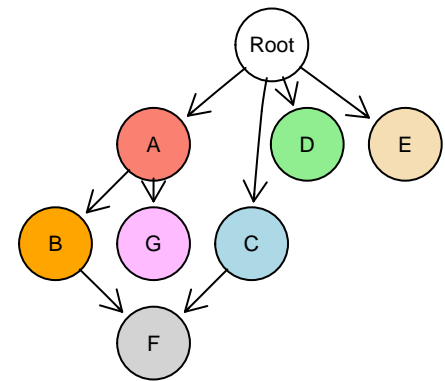

ID DNdxF6nsuNX9Tqlx  
 acc genotypes 48  
 peaks no back 1  
 removed edges 0  
 prop rem edges 0

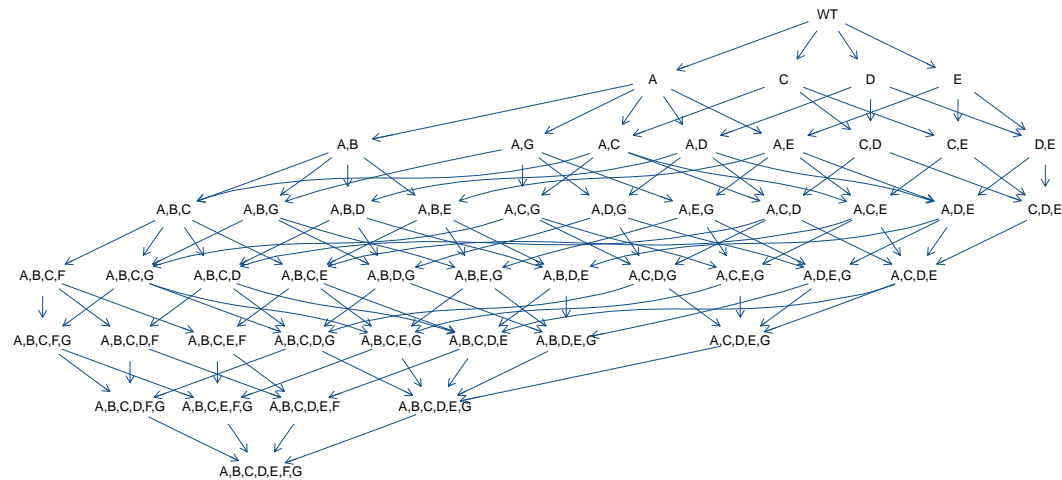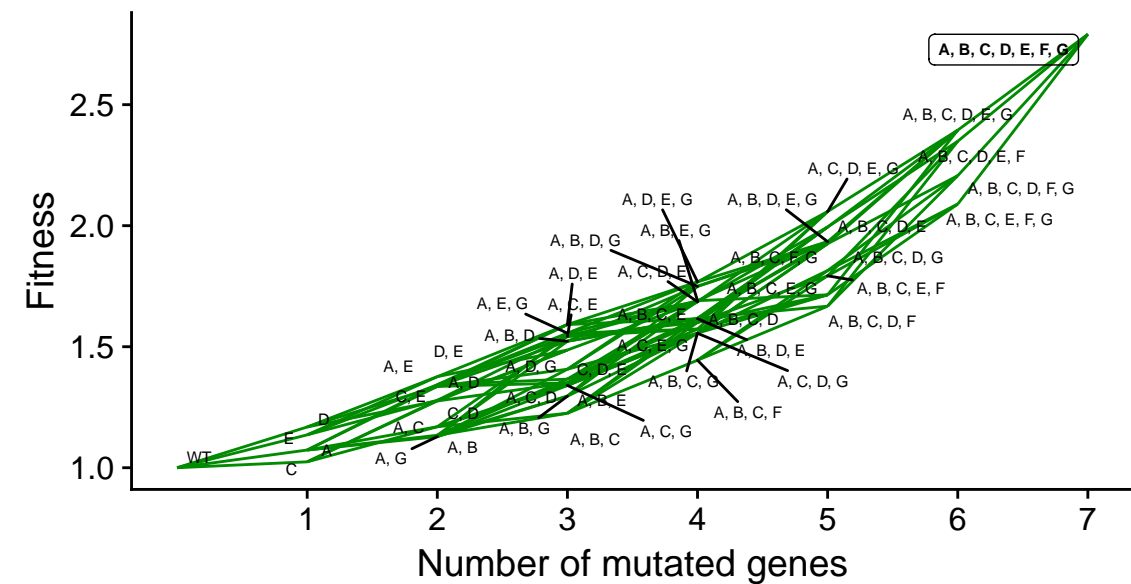

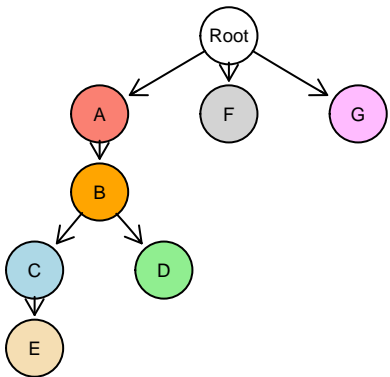

*ID* Dv8B7RHWdGuRzH1W  
*acc genotypes* 32  
*peaks no back* 1  
*removed edges* 0  
*prop rem edges* 0

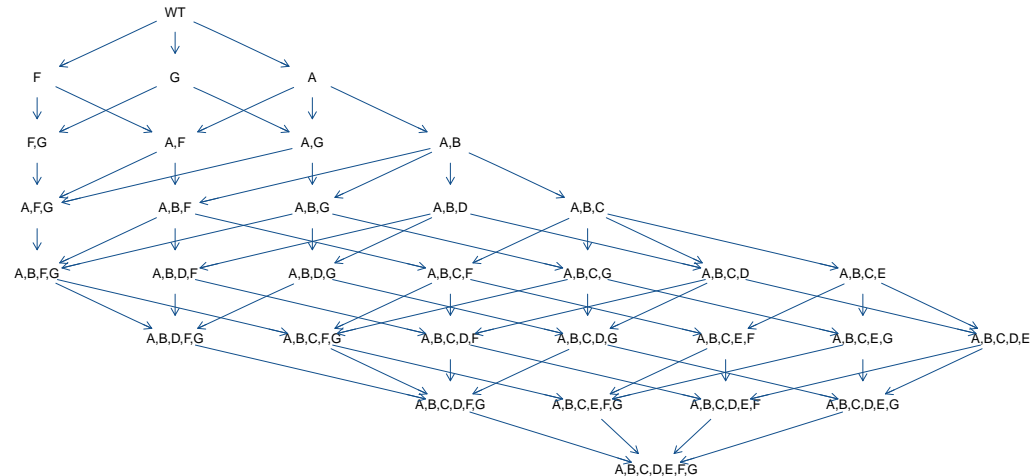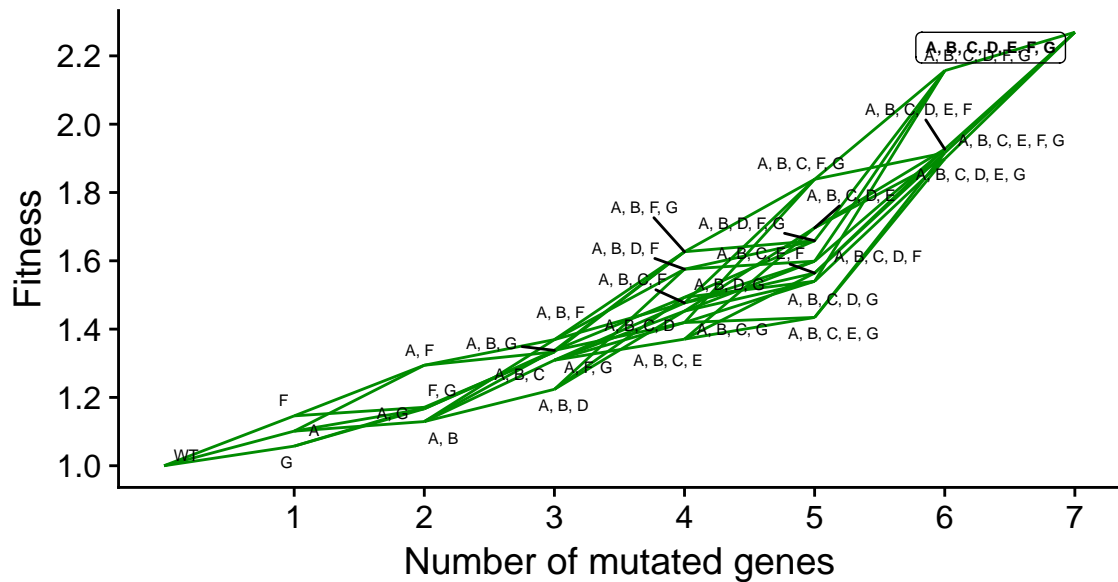

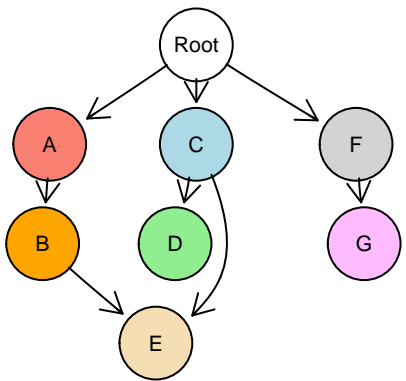

*ID* e6d6sLGItLVqnRO4  
*acc genotypes* 33  
*peaks no back* 1  
*removed edges* 0  
*prop rem edges* 0

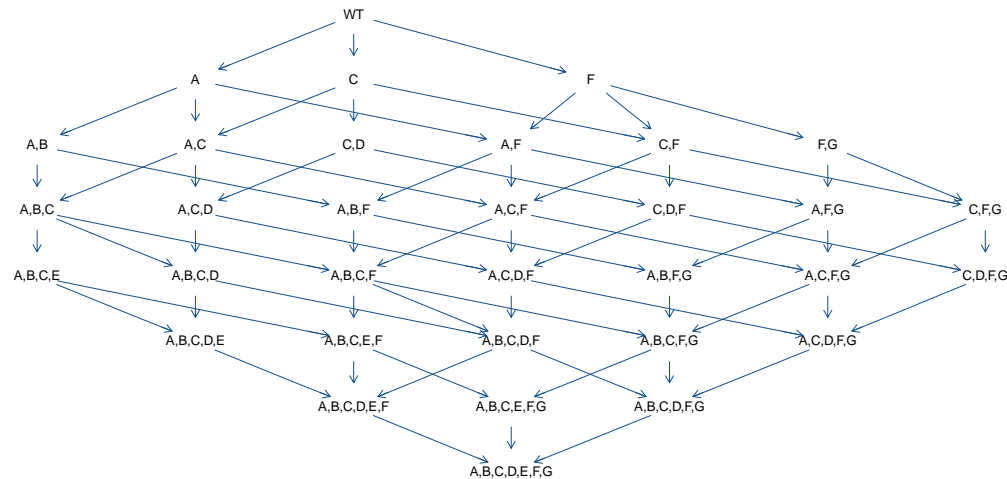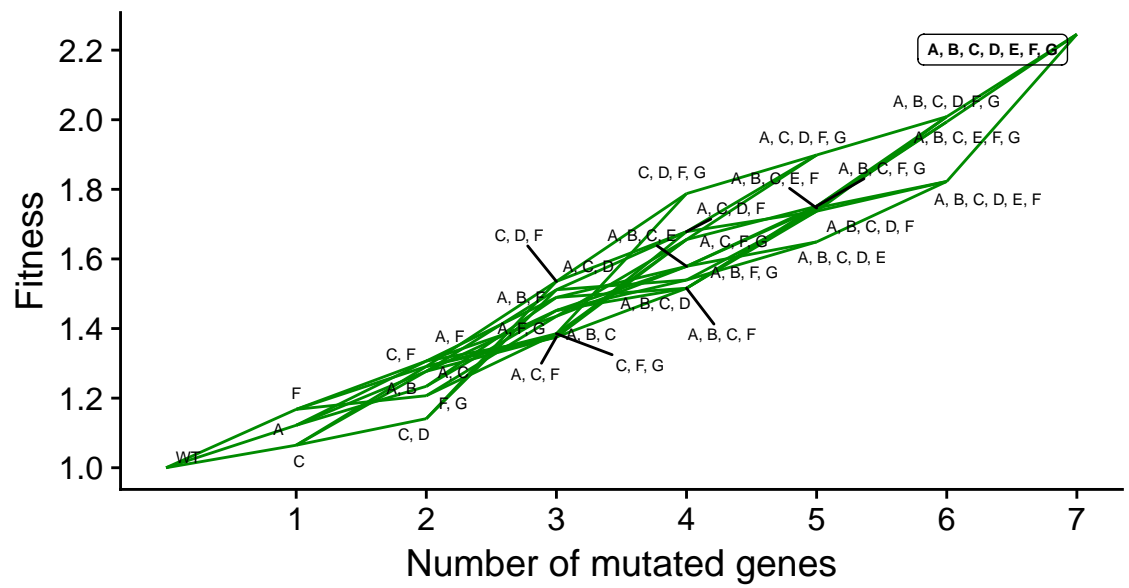



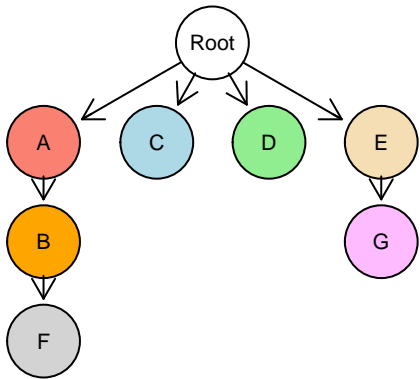

ID **E7PUOGD47fKBfgGx**  
 acc genotypes **48**  
 peaks no back **1**  
 removed edges **0**  
 prop rem edges **0**

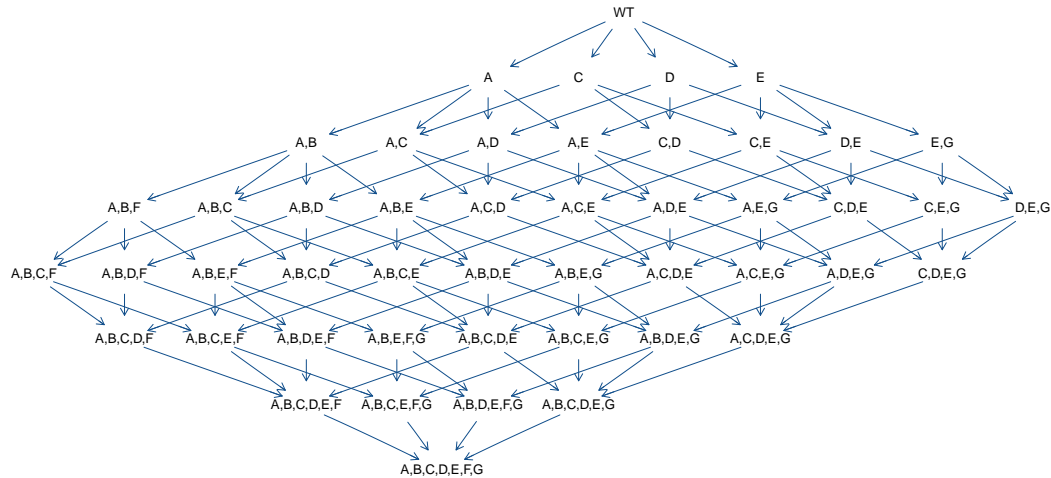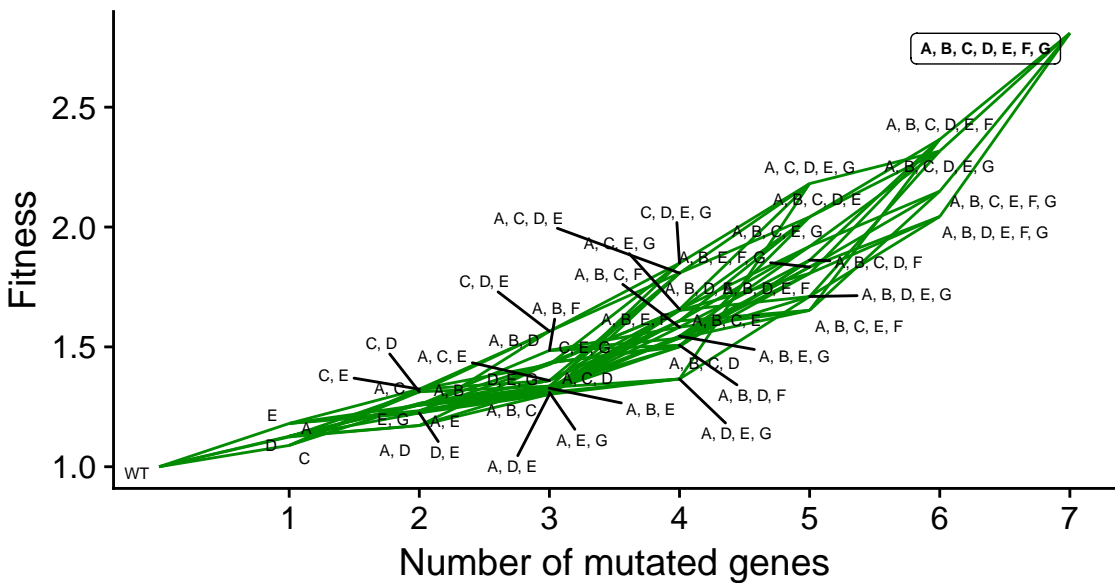

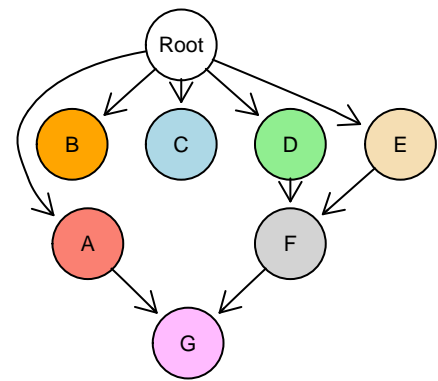

*ID* eEiiU6IXTAitvbXD  
*acc genotypes* 44  
*peaks no back* 1  
*removed edges* 0  
*prop rem edges* 0

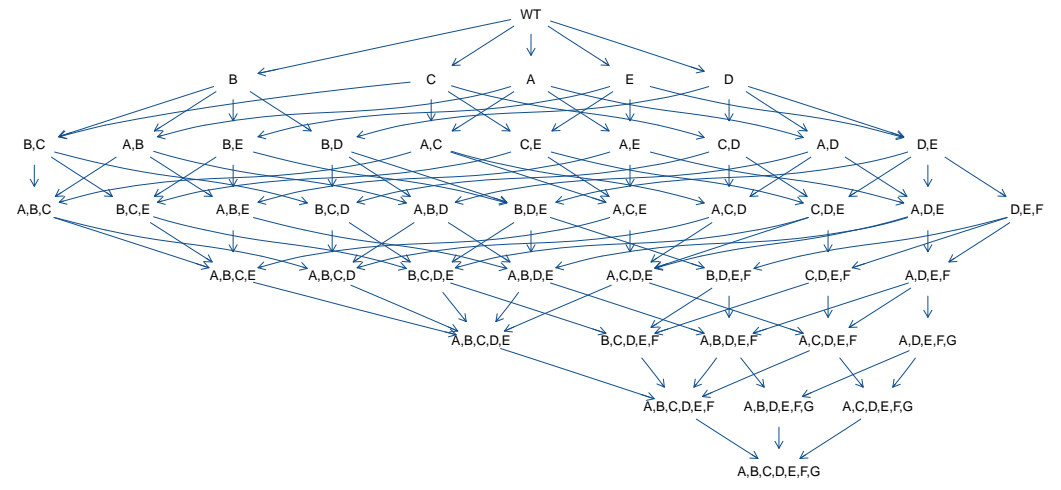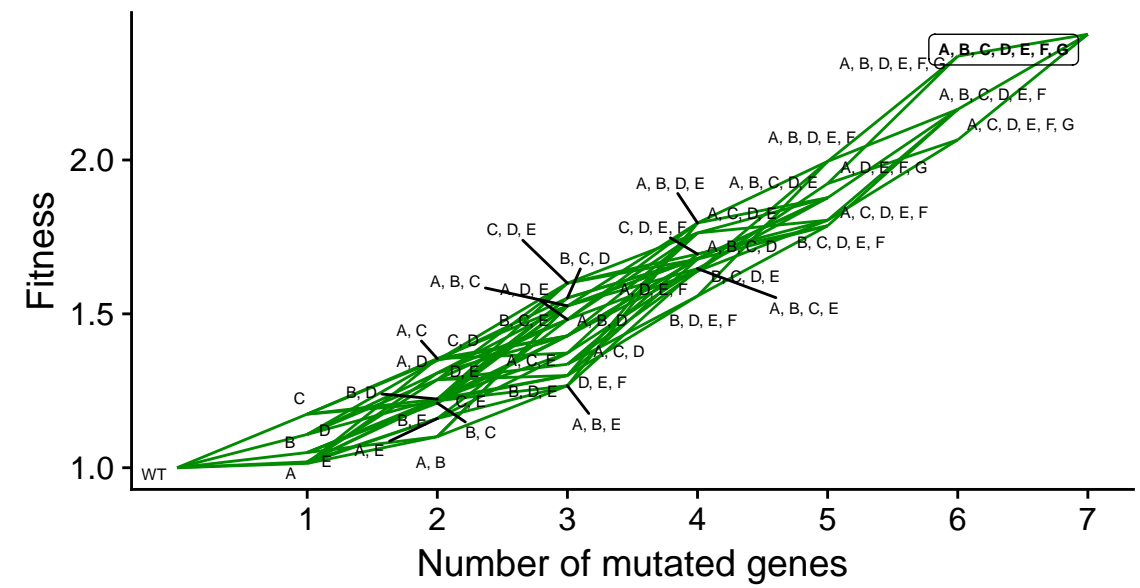

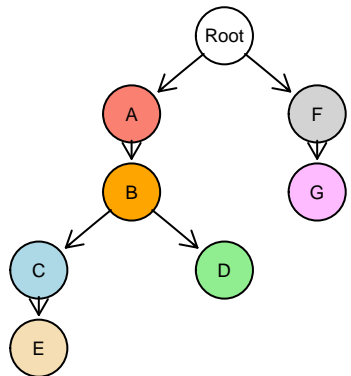

ID **EF3dPOLYSD4SFyjp**  
 acc genotypes **24**  
 peaks no back **1**  
 removed edges **0**  
 prop rem edges **0**

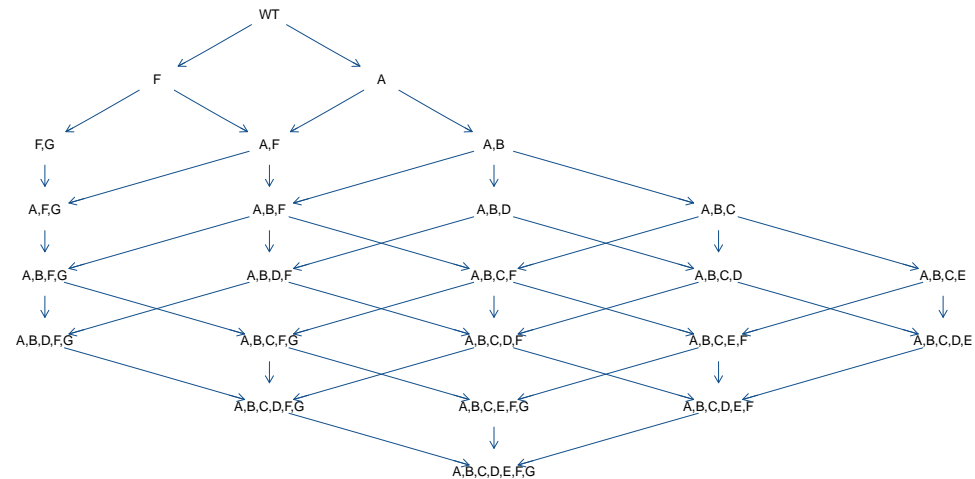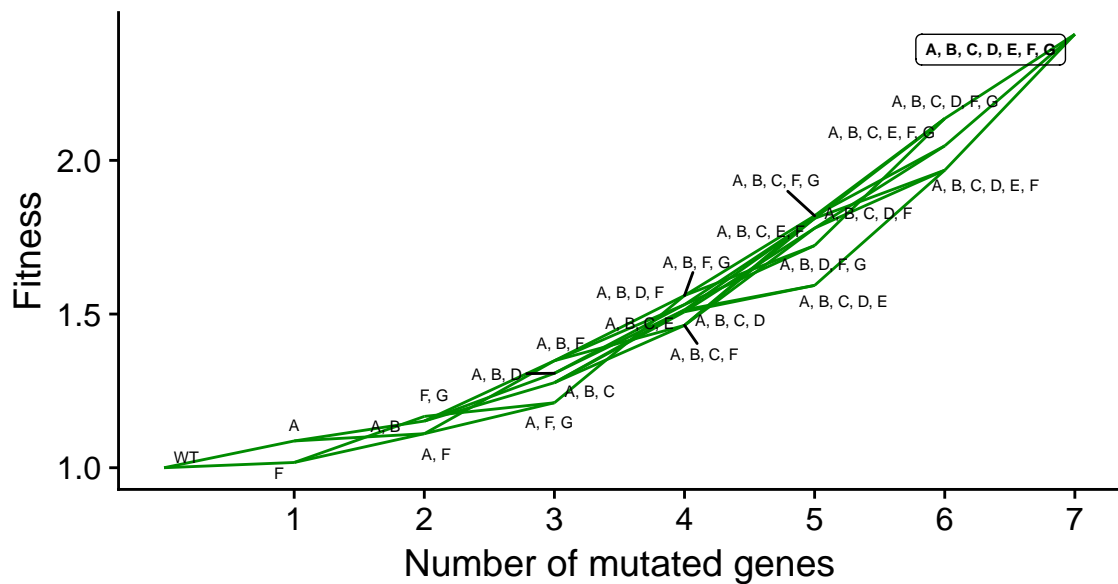

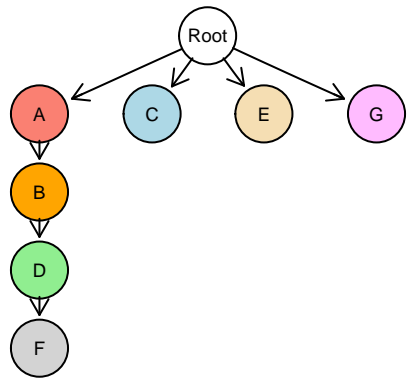

*ID* EikpyAkVdLnWHzZF  
*acc genotypes* 40  
*peaks no back* 1  
*removed edges* 0  
*prop rem edges* 0

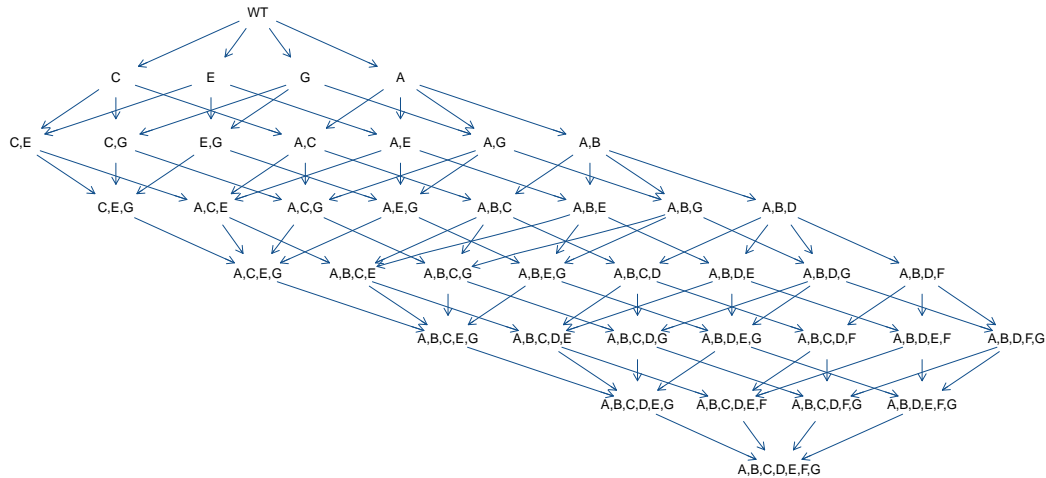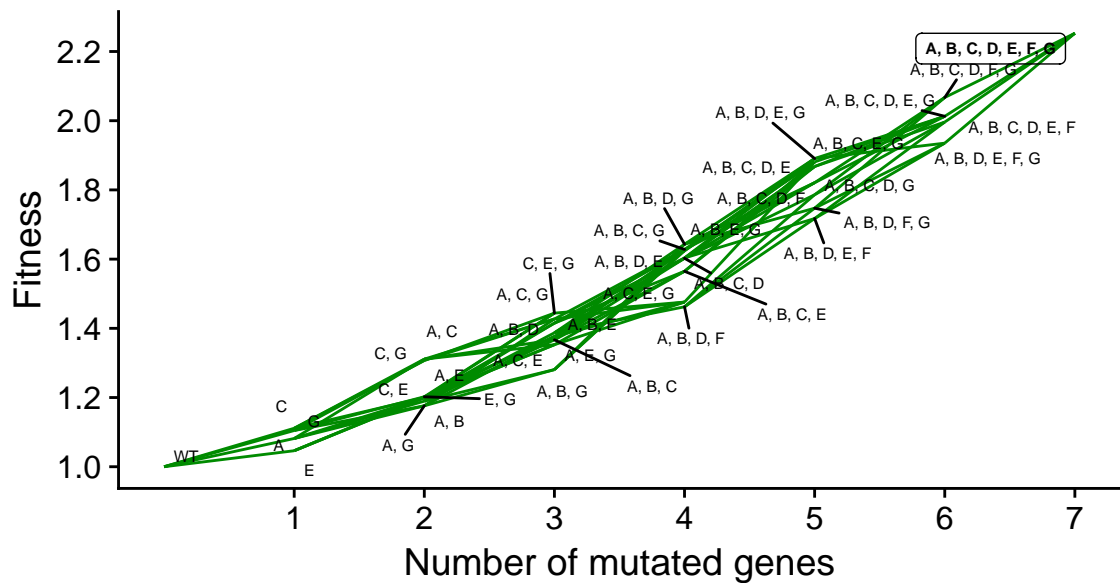

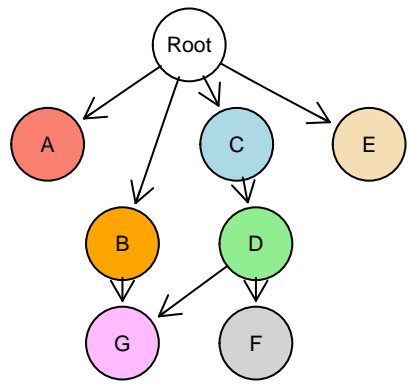

ID EL1Qu5ixDsldHlqT  
 acc genotypes 40  
 peaks no back 1  
 removed edges 0  
 prop rem edges 0

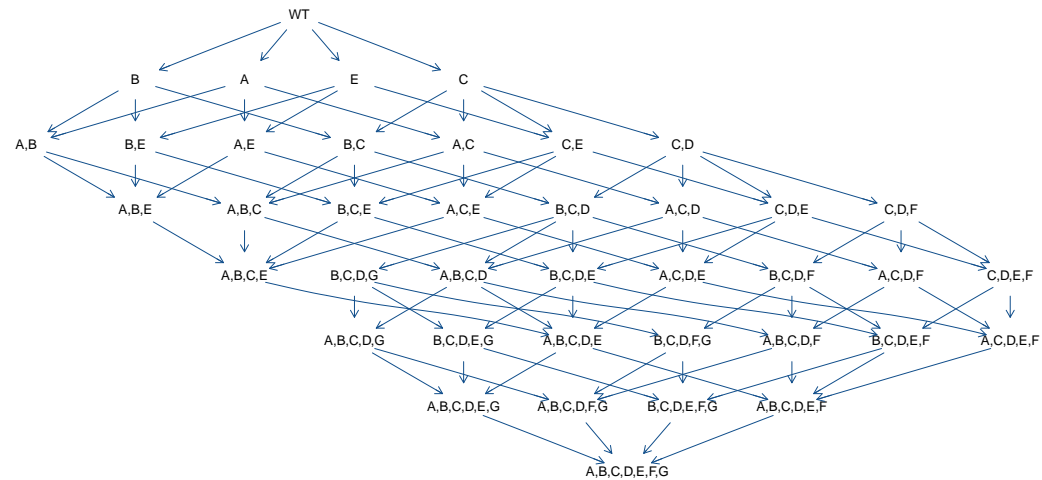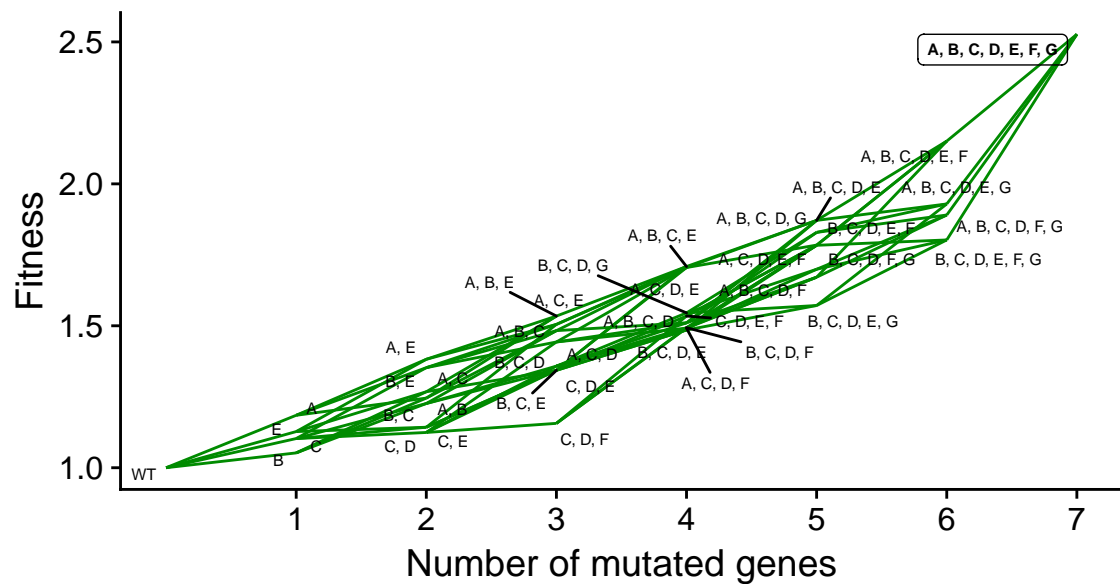

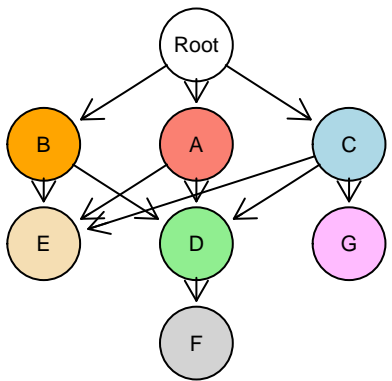

*ID* eyXg2MFYIT9dyyLY  
*acc genotypes* 22  
*peaks no back* 1  
*removed edges* 0  
*prop rem edges* 0

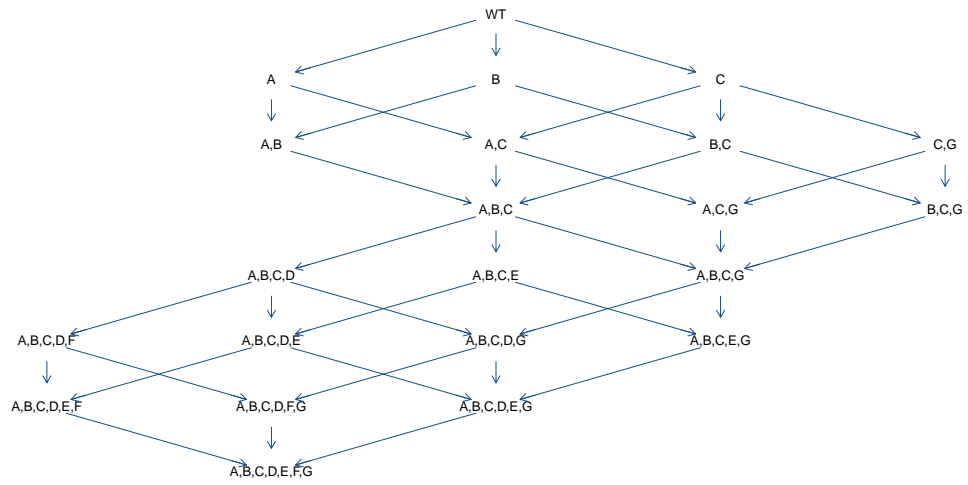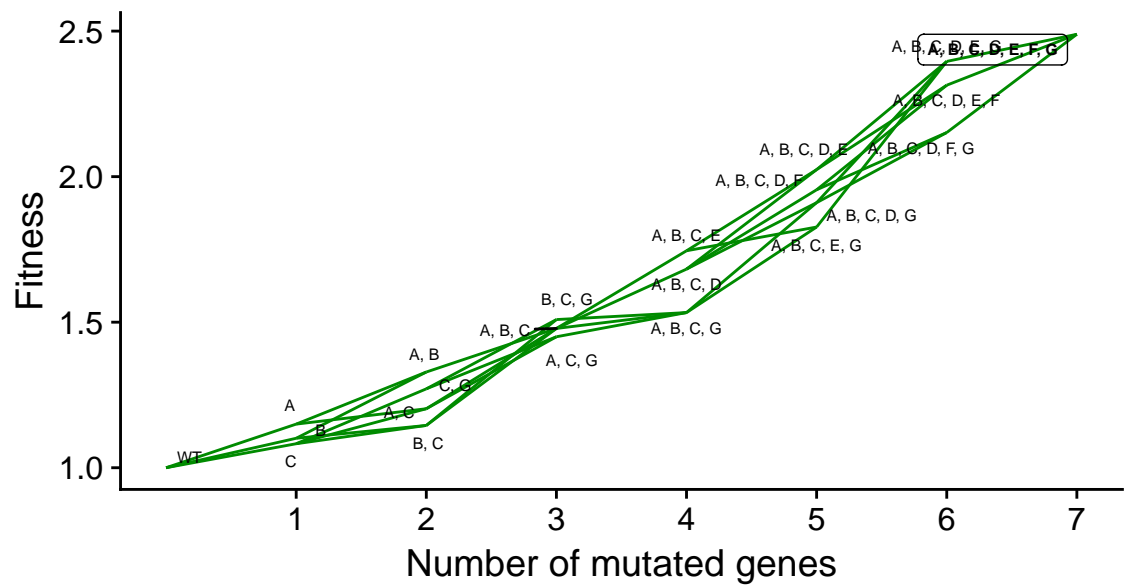



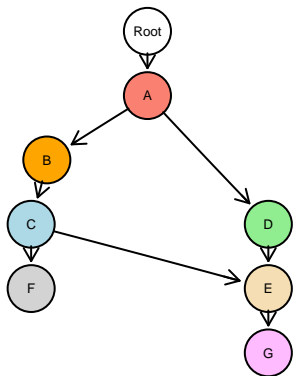

ID **FL34ukOM10yOTdr2W**  
 acc genotypes **13**  
 peaks no back 1  
 removed edges 0  
 prop rem edges 0

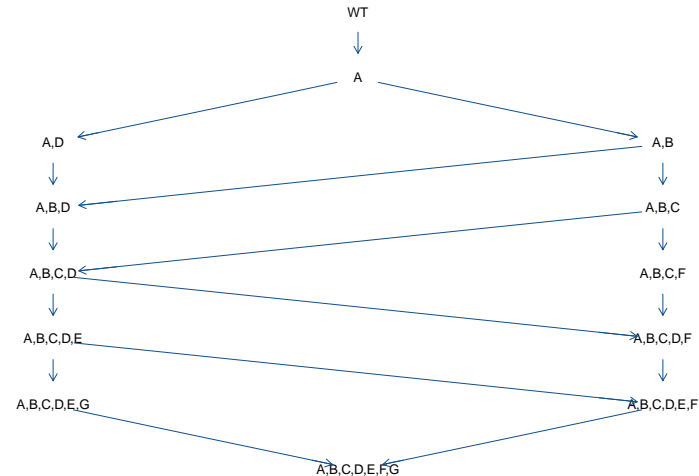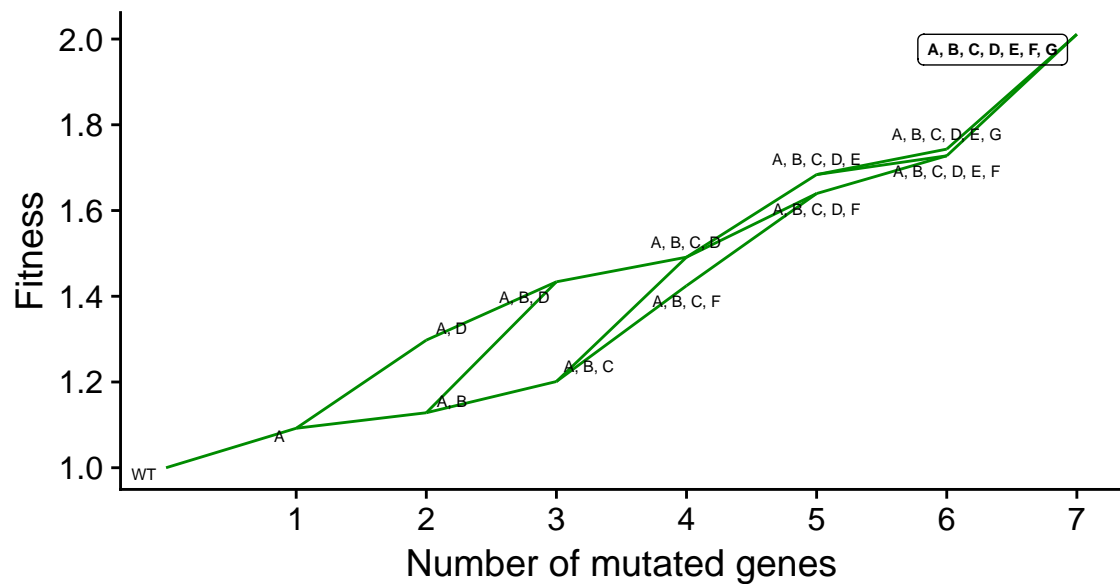



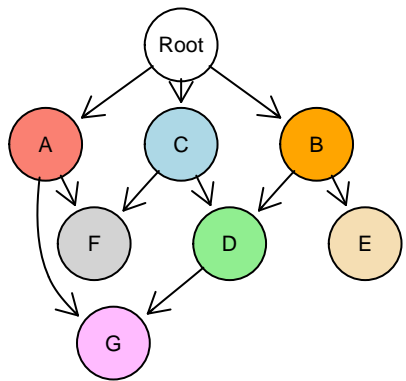

ID fMD9ePnbEbDWW2mR  
 acc genotypes 25  
 peaks no back 1  
 removed edges 0  
 prop rem edges 0

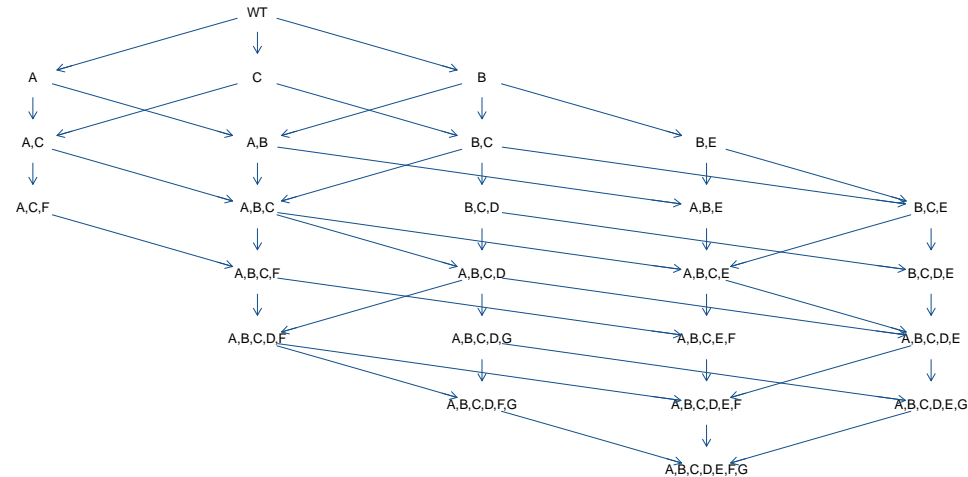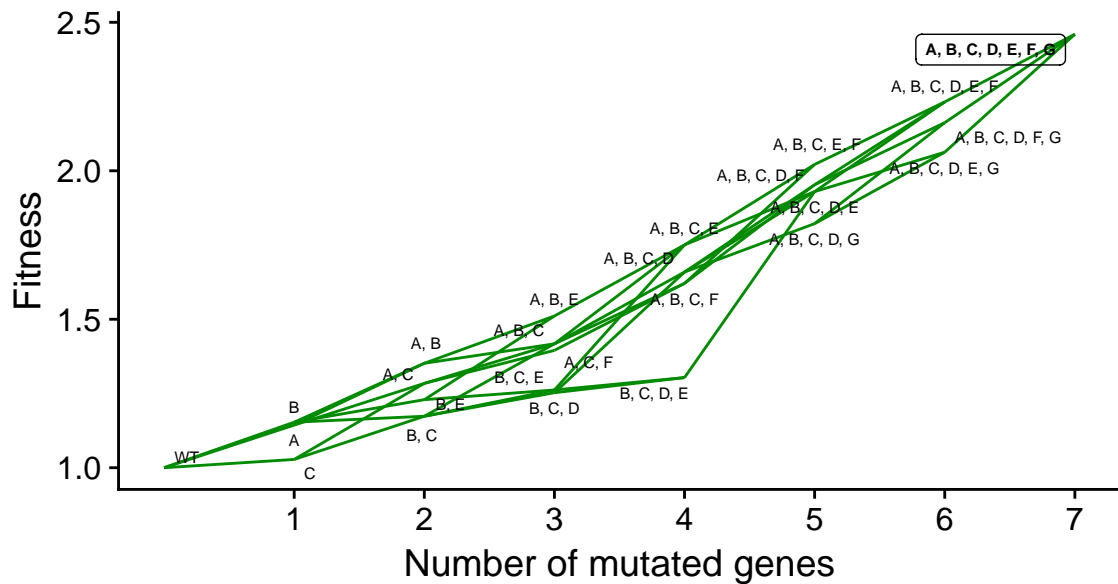

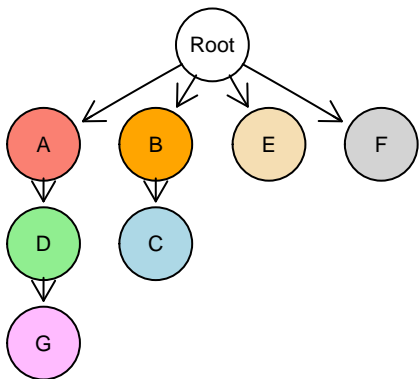

*ID* f03JEhzhobZEAWxH  
*acc genotypes* 48  
*peaks no back* 1  
*removed edges* 0  
*prop rem edges* 0

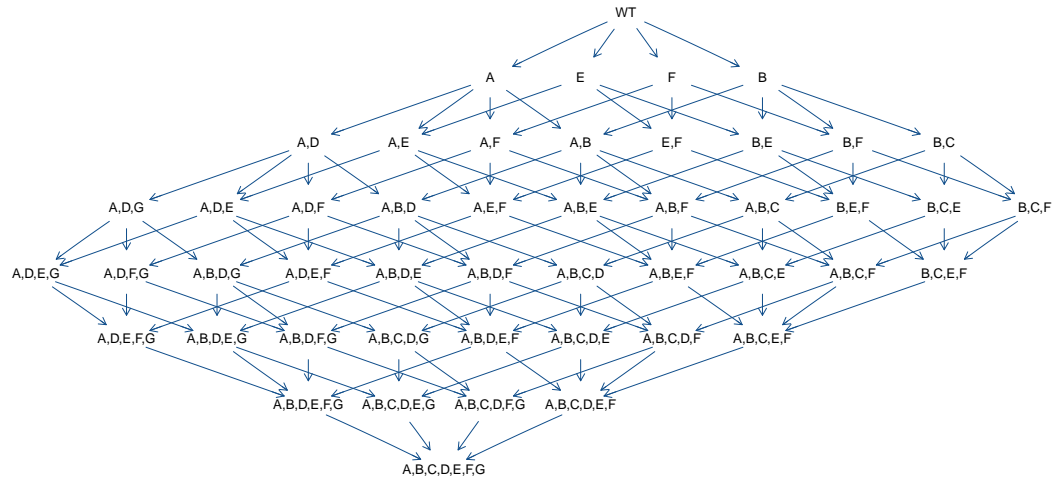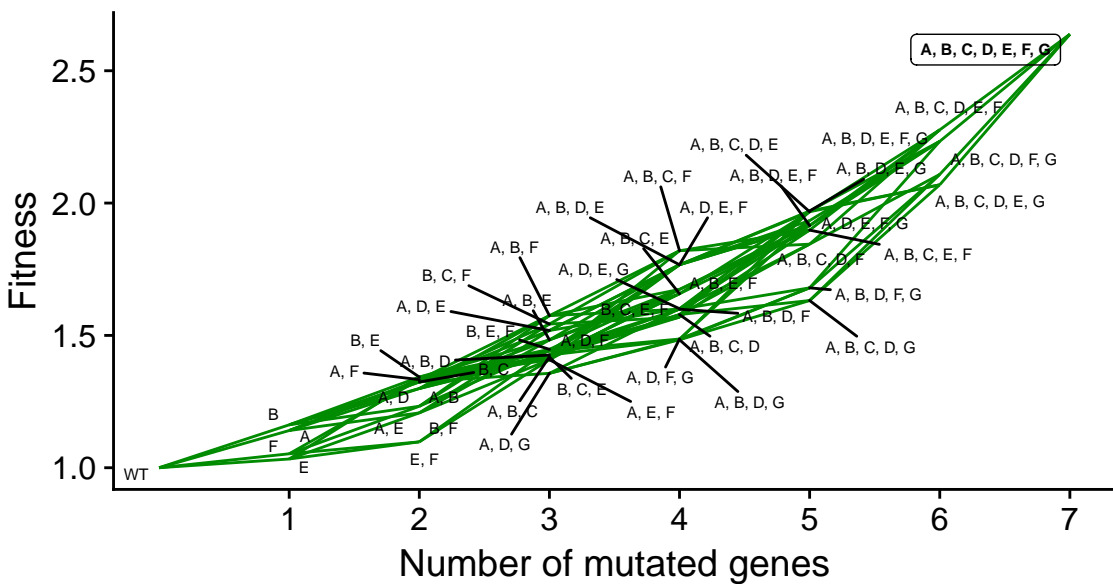

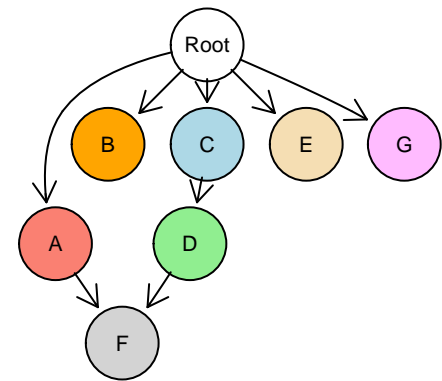

ID FoHYHTCWCEdt7JW8  
 acc genotypes 56  
 peaks no back 1  
 removed edges 0  
 prop rem edges 0

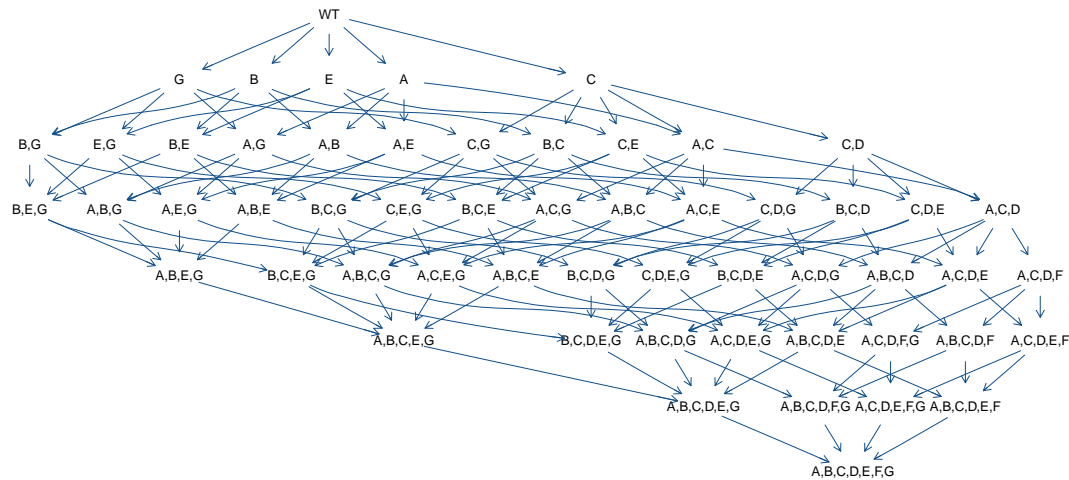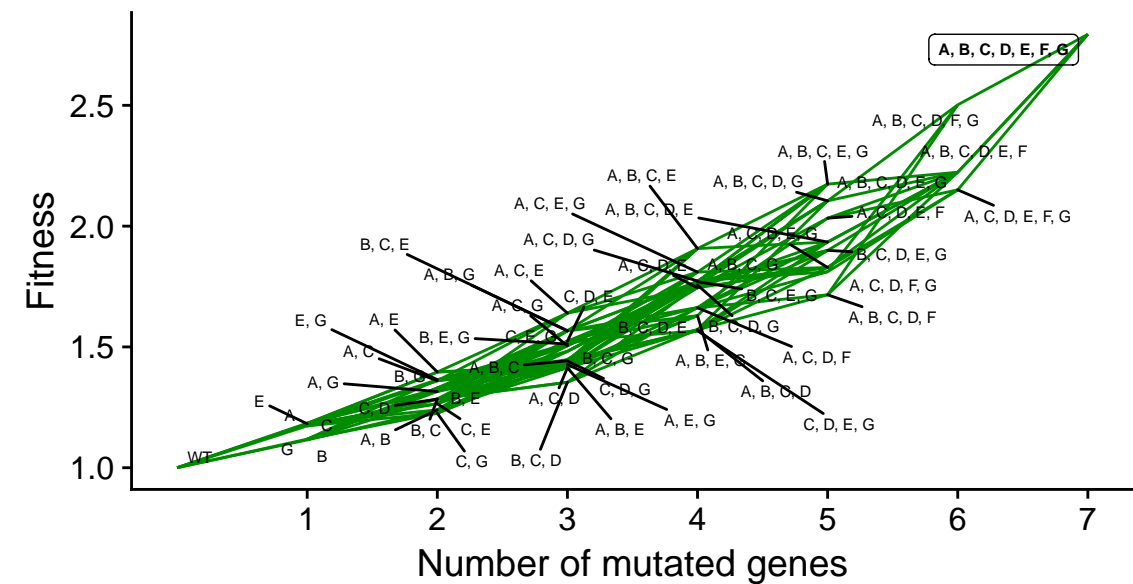

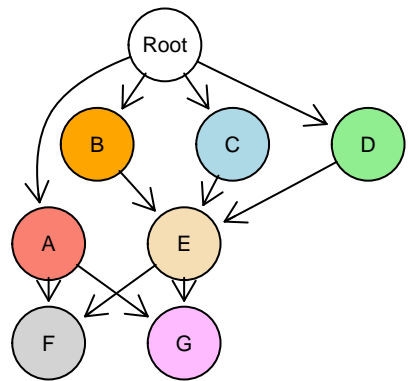

*ID* FooCHDFetIIILLSqj  
*acc genotypes* 21  
*peaks no back* 1  
*removed edges* 0  
*prop rem edges* 0

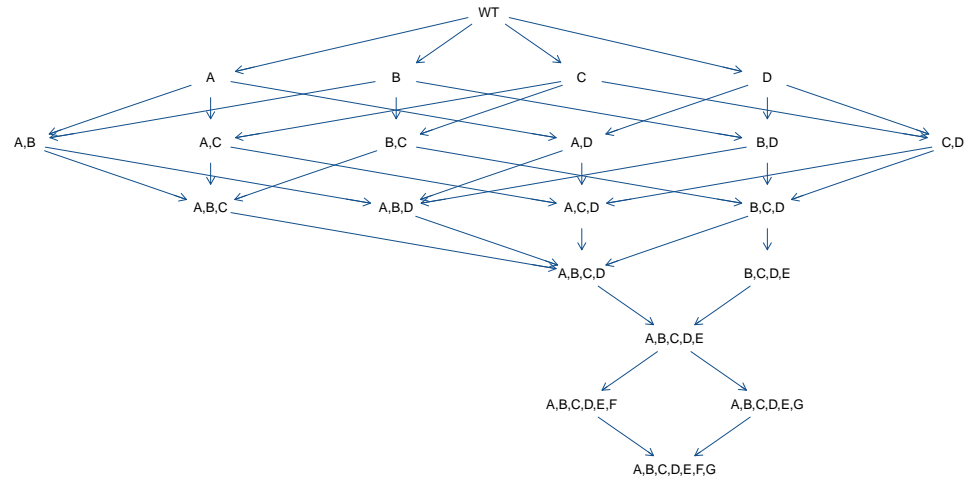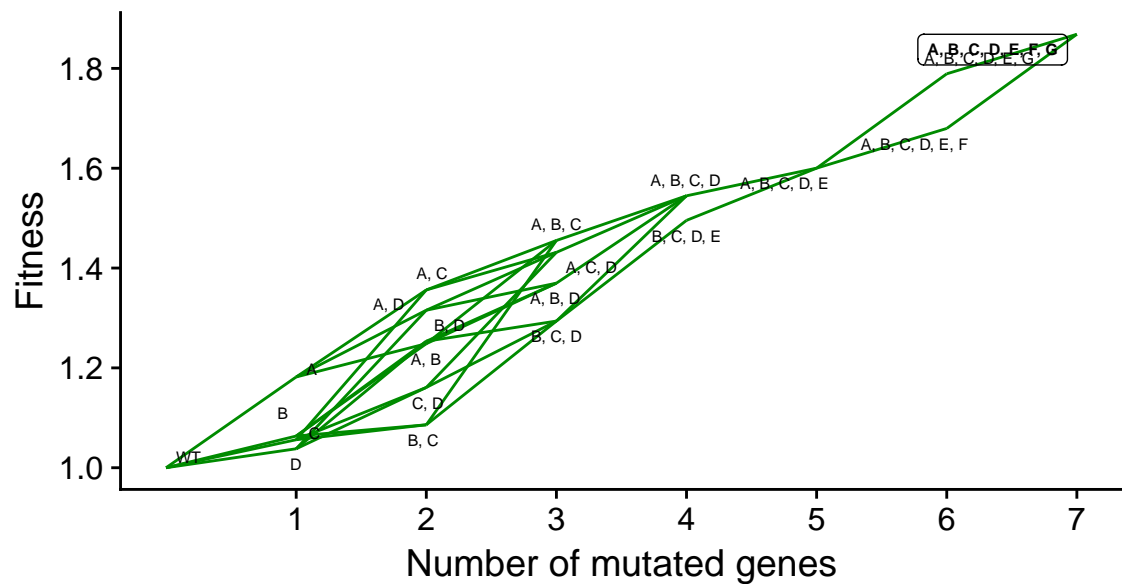

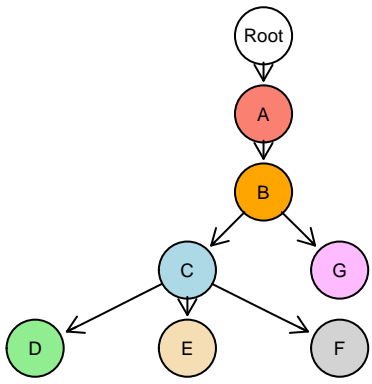

ID **Gb23niBOgzn9YAzw**  
 acc genotypes **20**  
 peaks no back **1**  
 removed edges **0**  
 prop rem edges **0**

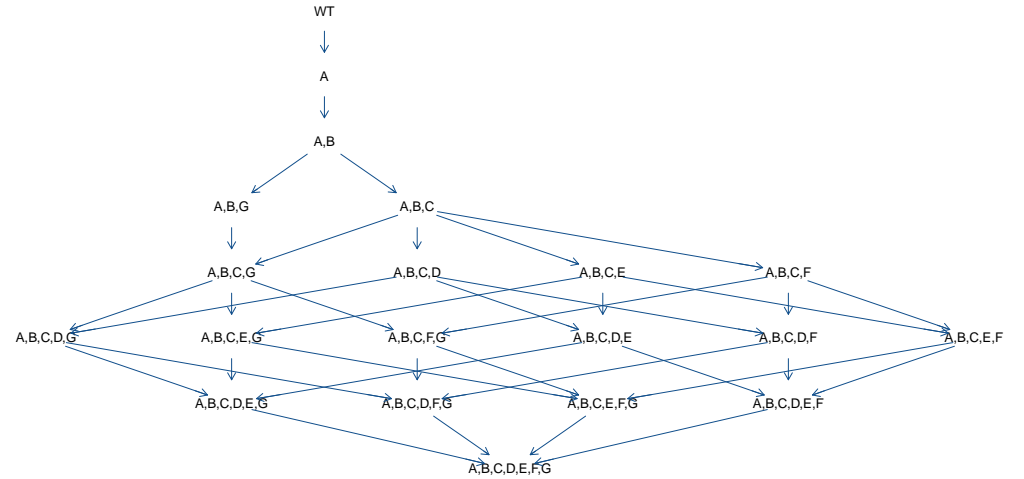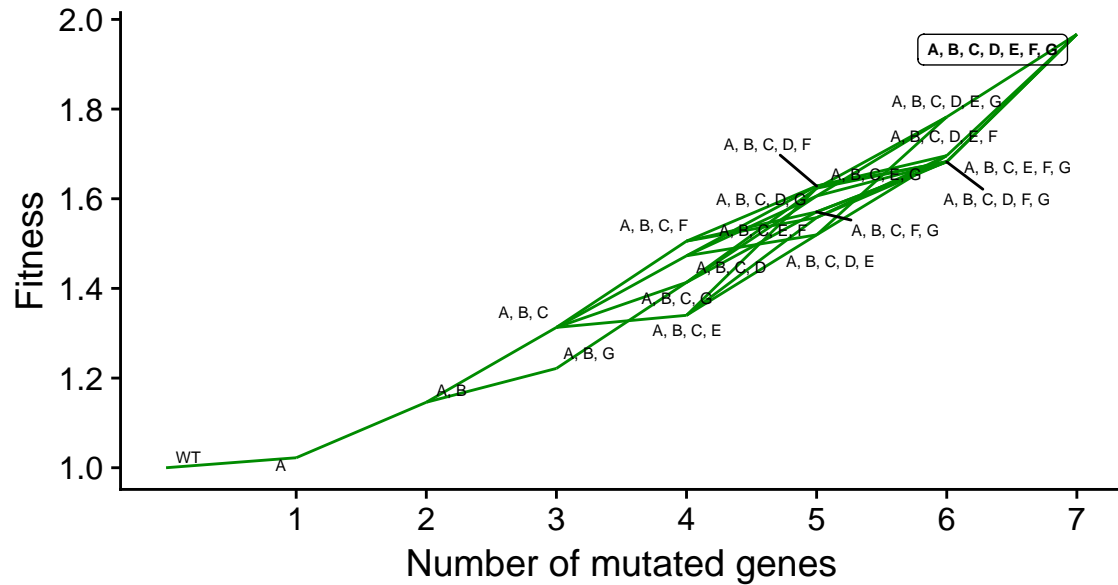

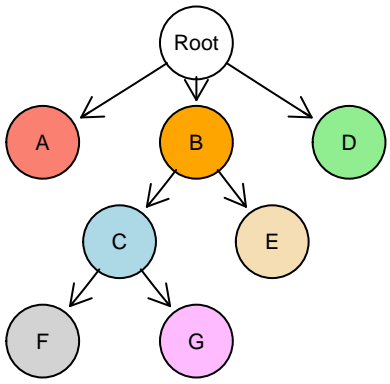

ID **GIWxSFRzKt1hZIMN**  
 acc genotypes **44**  
 peaks no back **1**  
 removed edges **0**  
 prop rem edges **0**

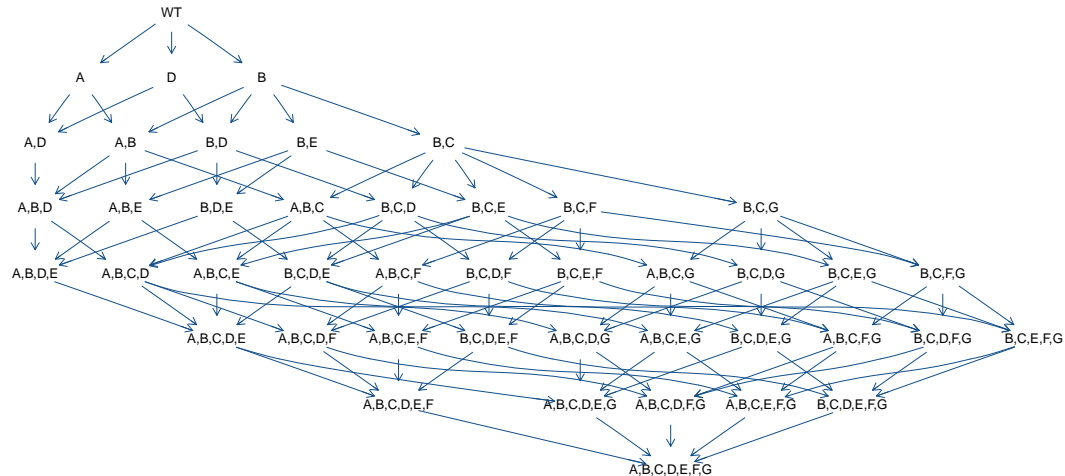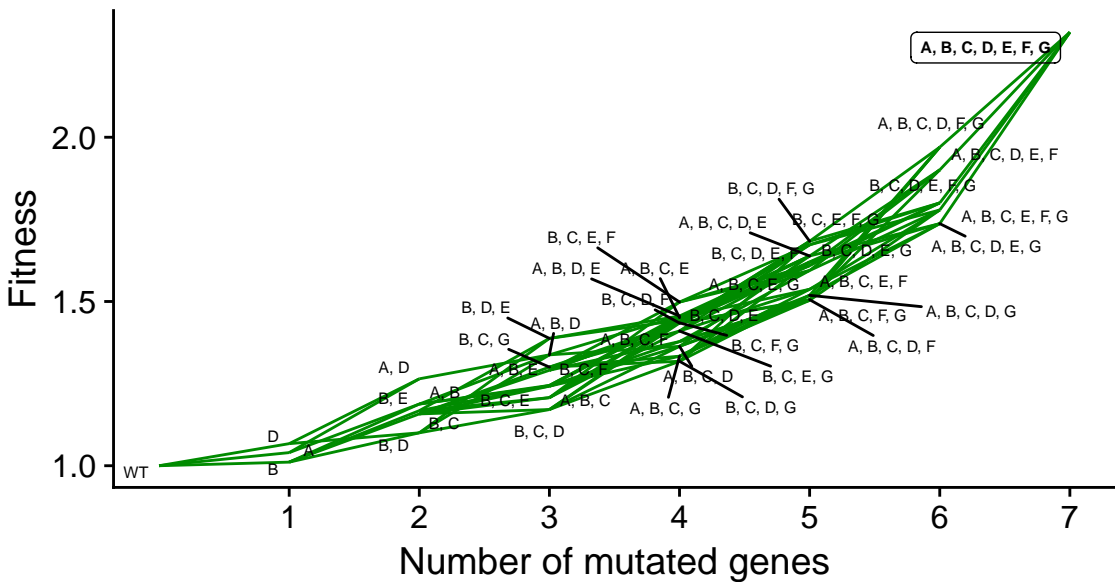

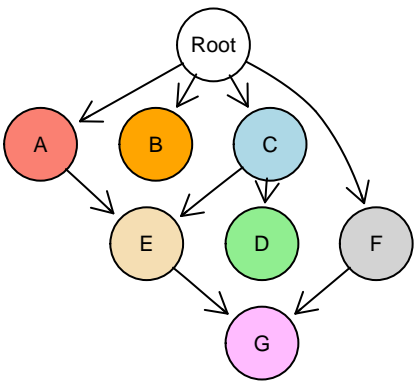

ID **gLwa1VINXzVMwvea**  
 acc genotypes **36**  
 peaks no back **1**  
 removed edges **0**  
 prop rem edges **0**

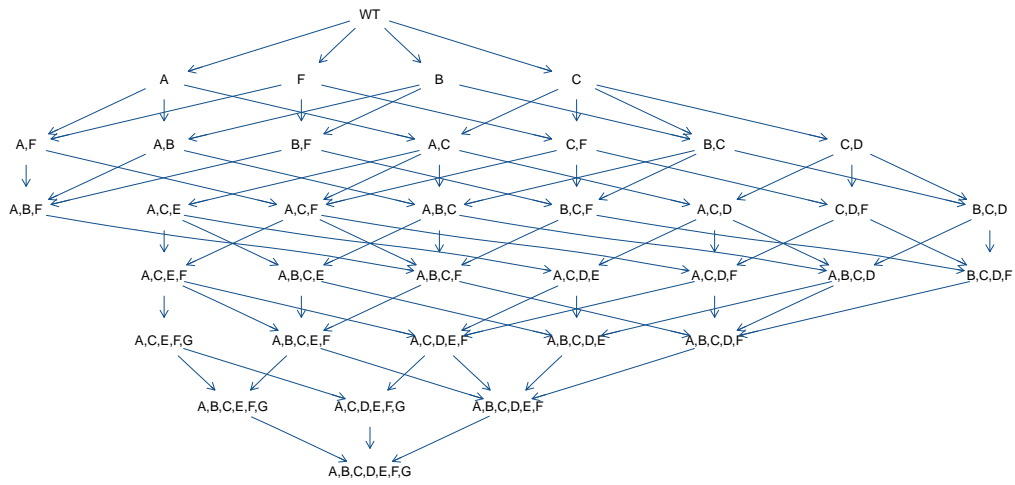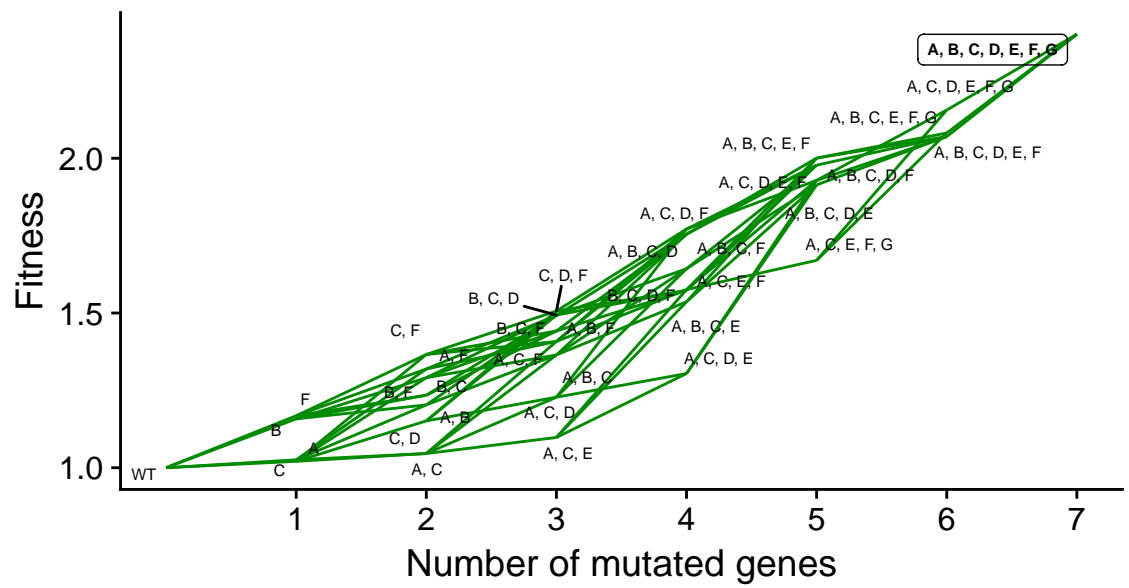

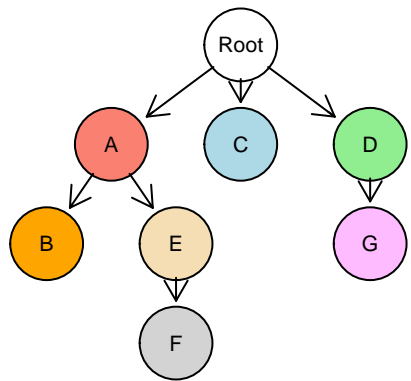

*ID* Gn2HkZc73V1xJWfm  
*acc genotypes* 42  
*peaks no back* 1  
*removed edges* 0  
*prop rem edges* 0

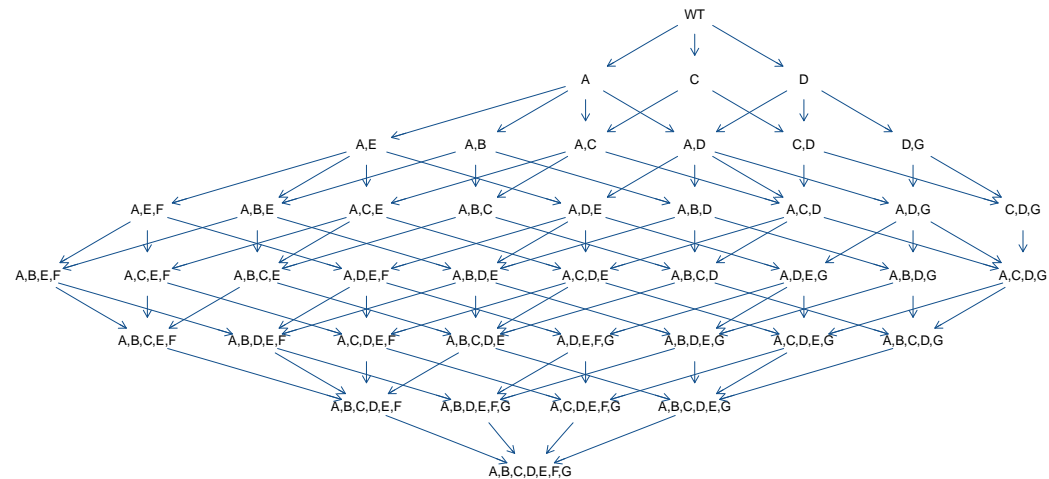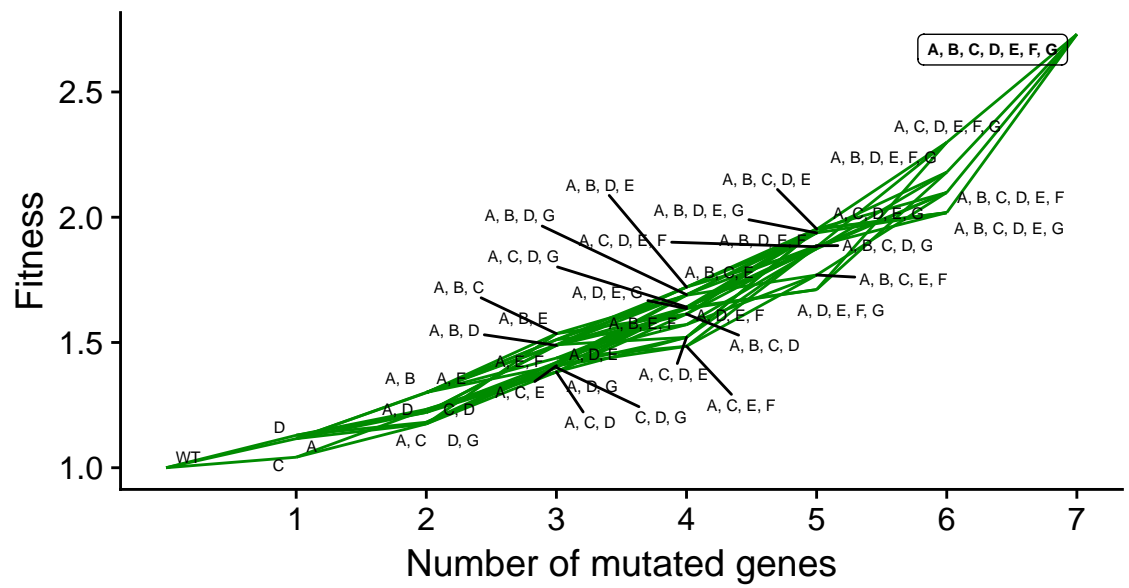



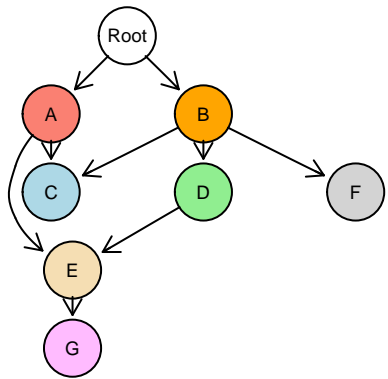

ID GNq25Sjl71oPTH7O  
 acc genotypes 22  
 peaks no back 1  
 removed edges 0  
 prop rem edges 0

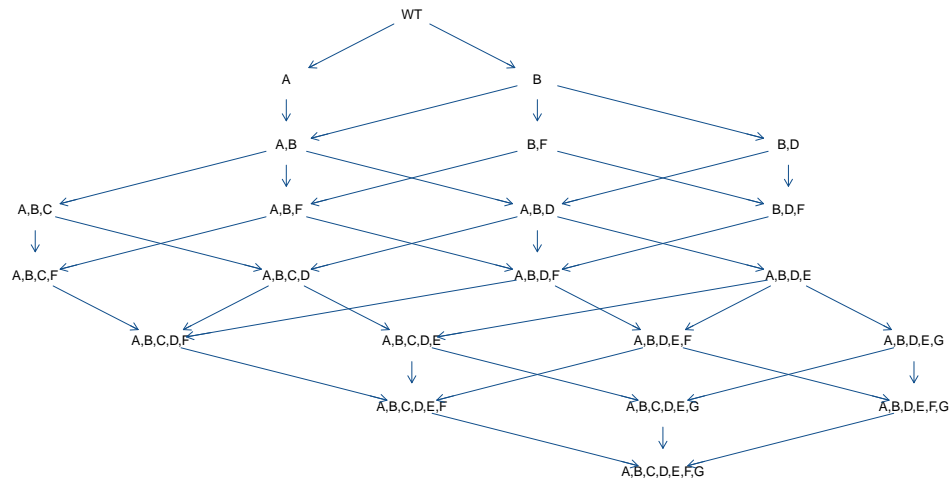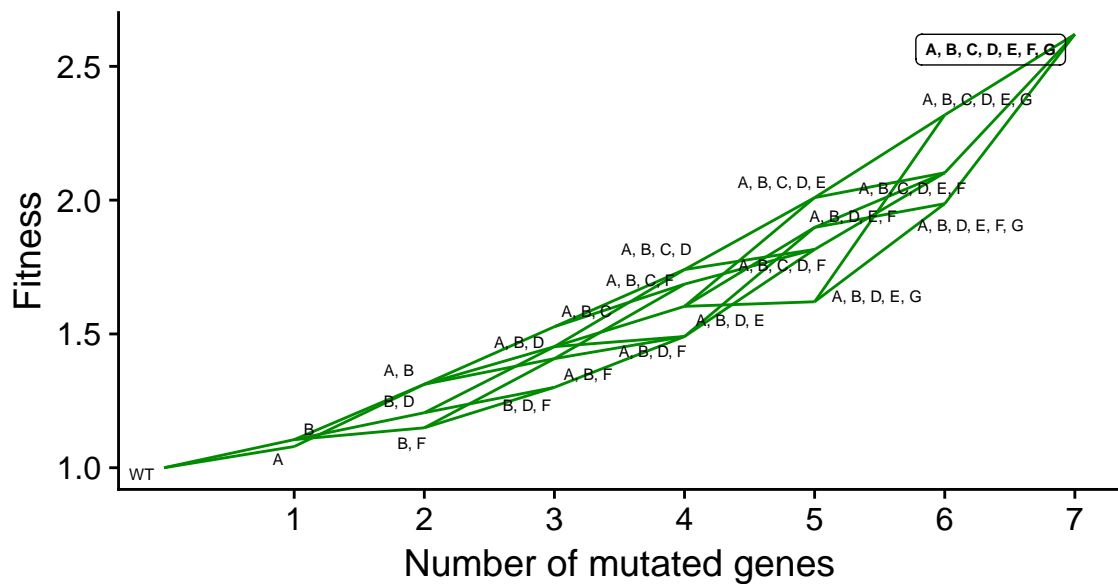

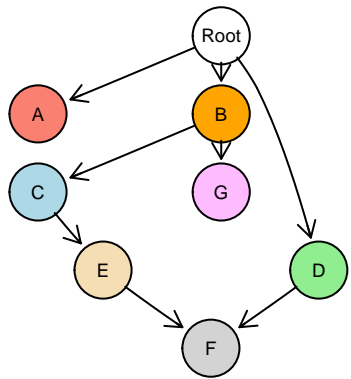

ID **gNsBkqVxNevMiAxL**  
 acc genotypes **32**  
 peaks no back **1**  
 removed edges **0**  
 prop rem edges **0**

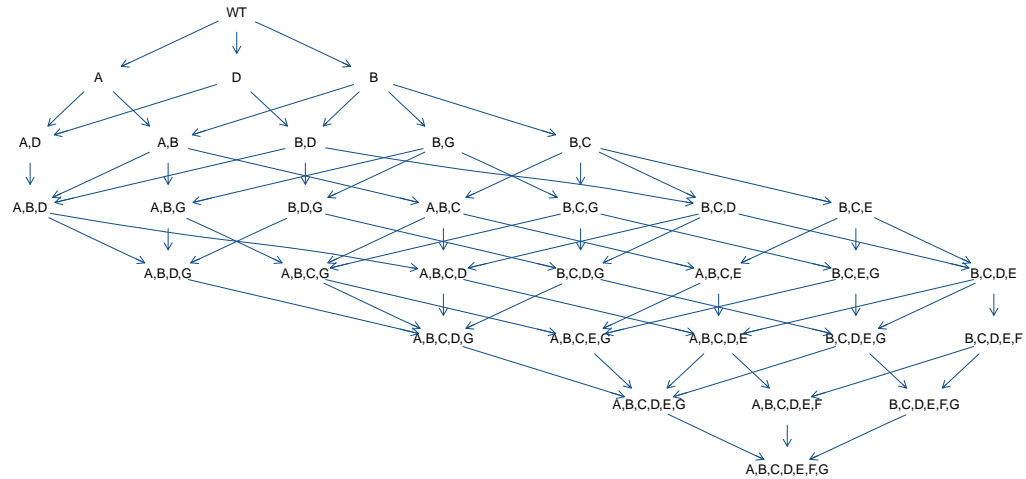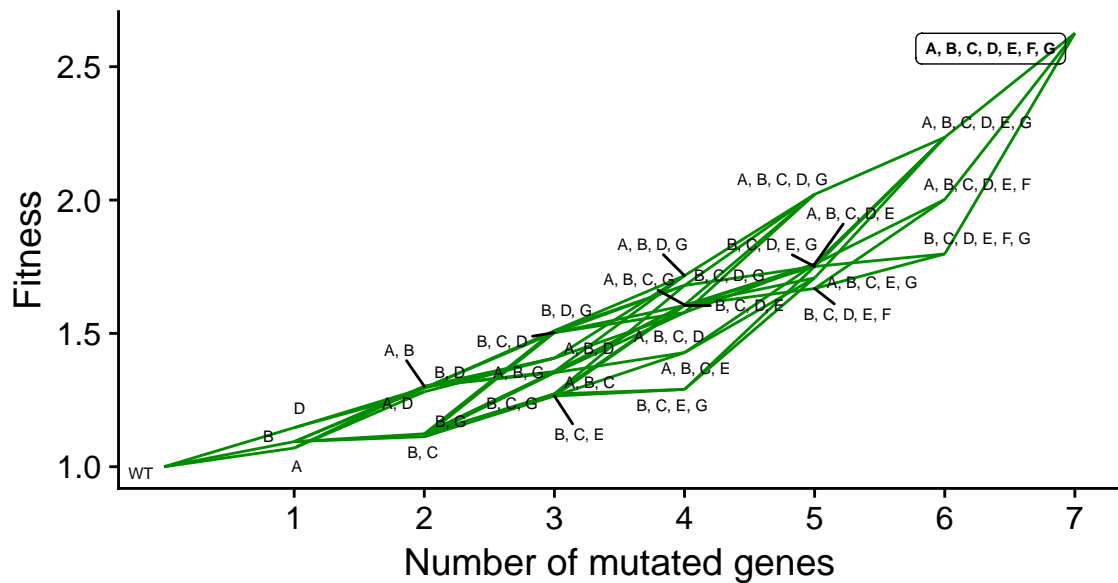

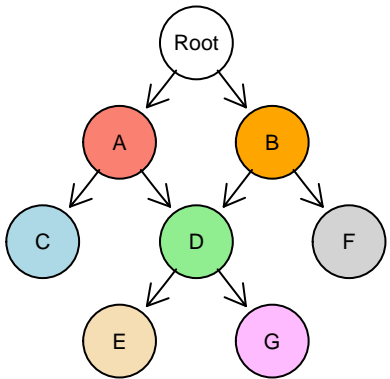

ID **Gp543eGHWygA1P8H**  
 acc genotypes **25**  
 peaks no back 1  
 removed edges 0  
 prop rem edges 0

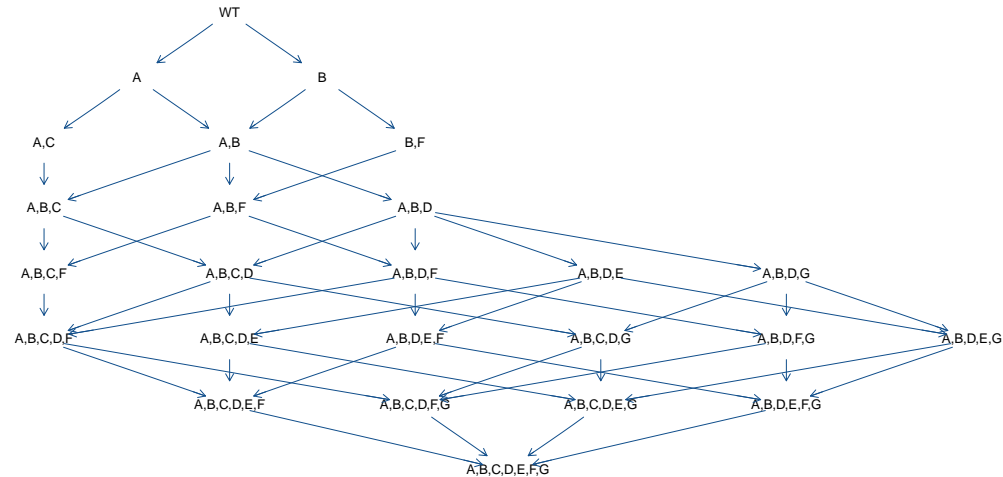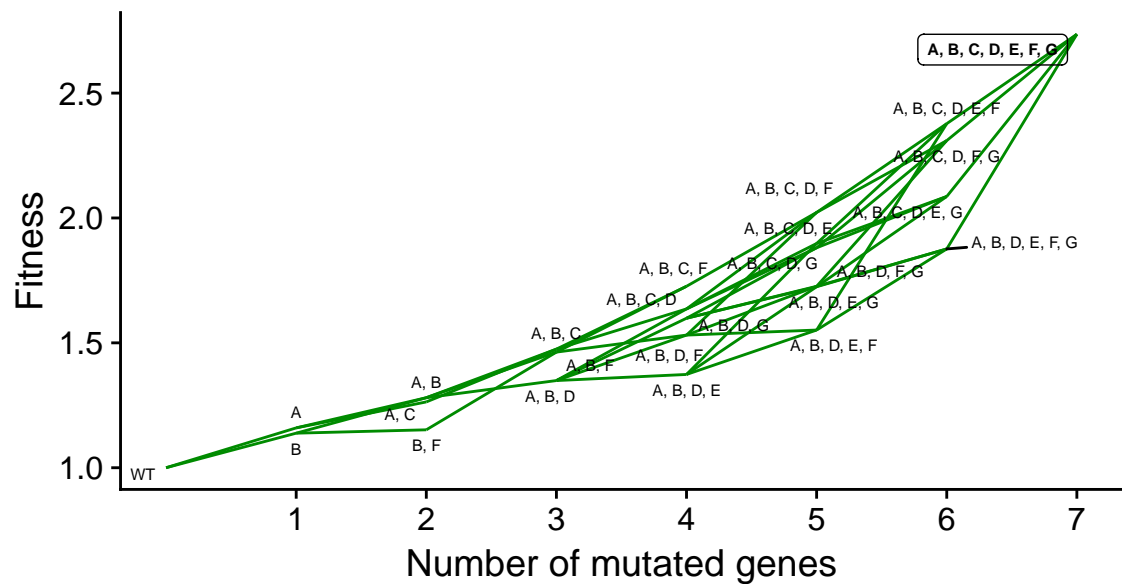

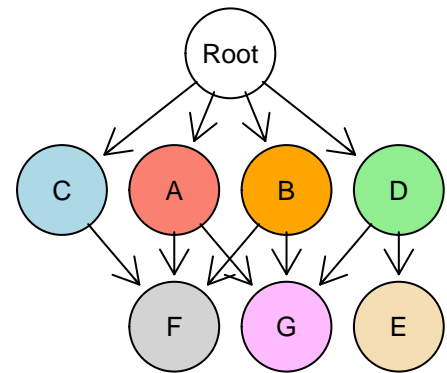

*ID* **gtuJ3IZP3MzeoW31**  
*acc genotypes* **33**  
*peaks no back* **1**  
*removed edges* **0**  
*prop rem edges* **0**

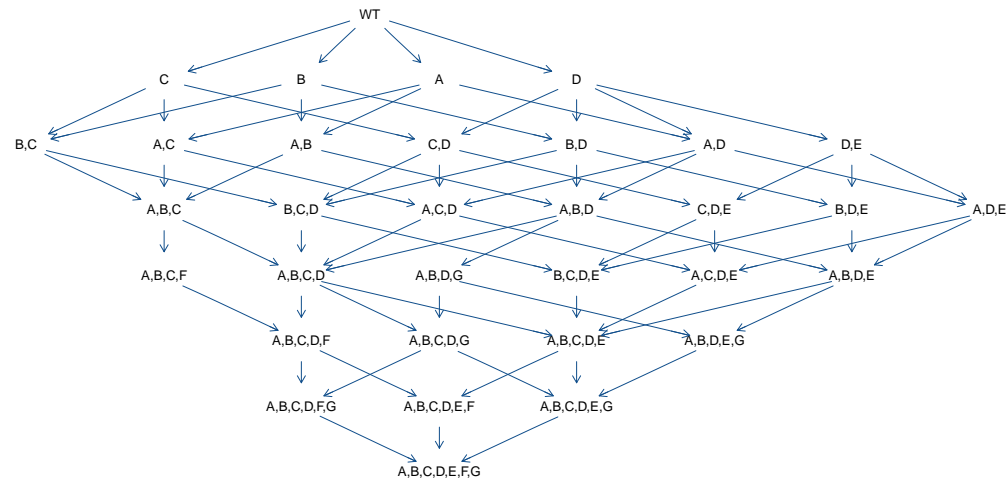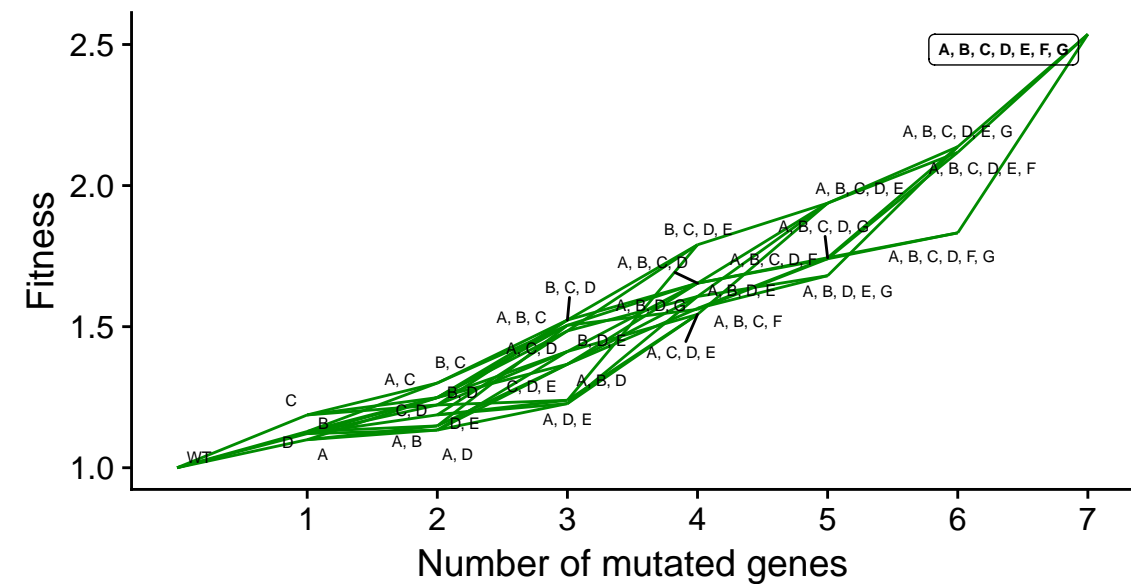

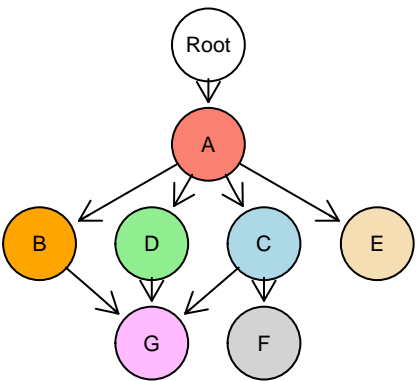

ID GyBZiyDvewoQU6ri  
 acc genotypes 29  
 peaks no back 1  
 removed edges 0  
 prop rem edges 0

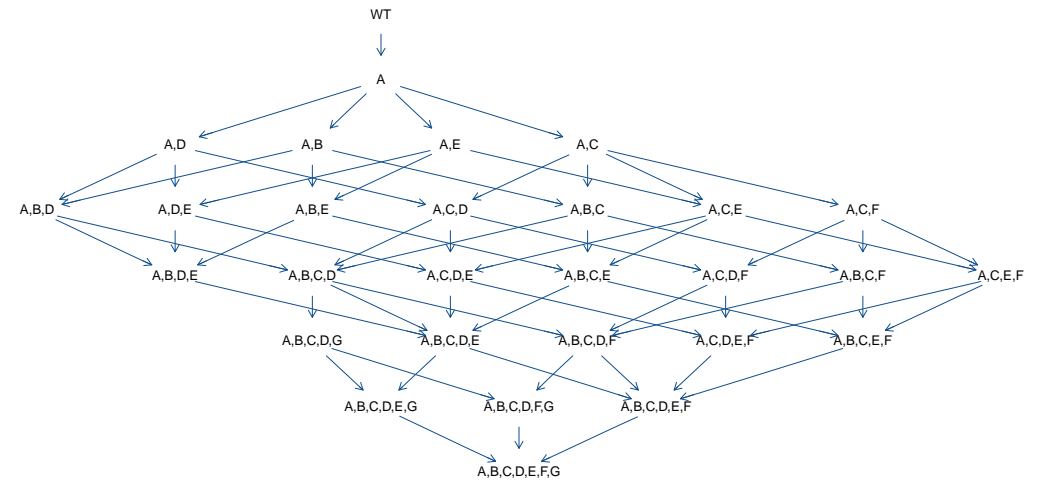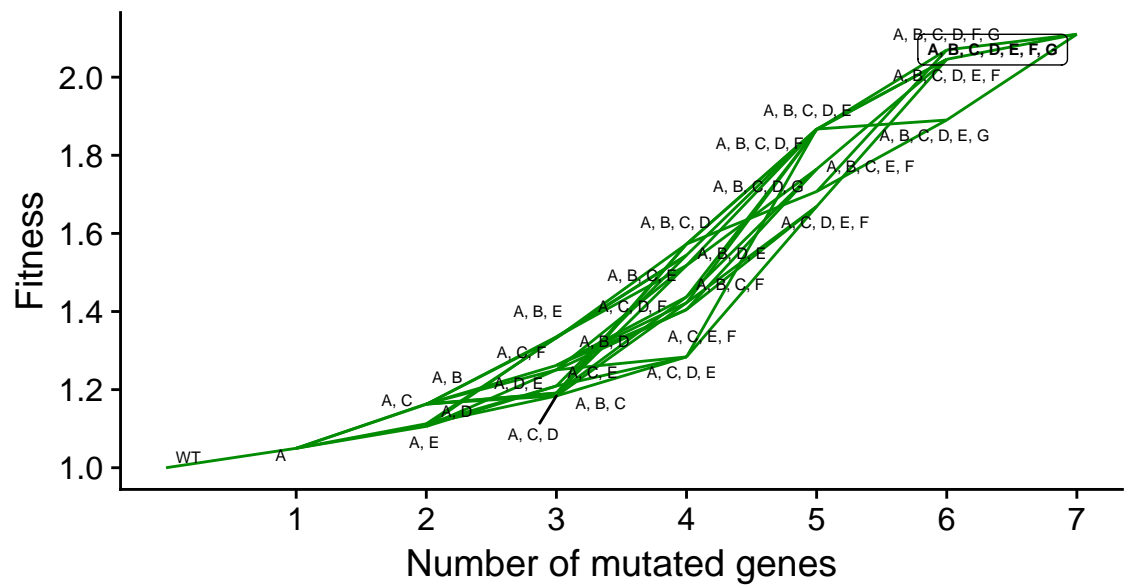

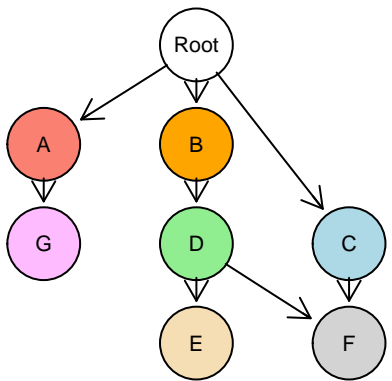

ID **h5XuDSnadWt672QY**  
 acc genotypes **30**  
 peaks no back **1**  
 removed edges **0**  
 prop rem edges **0**

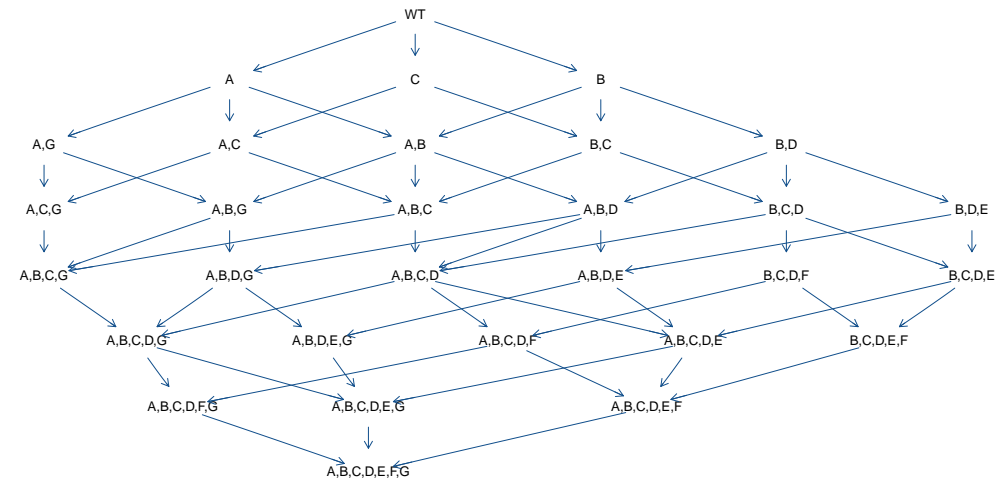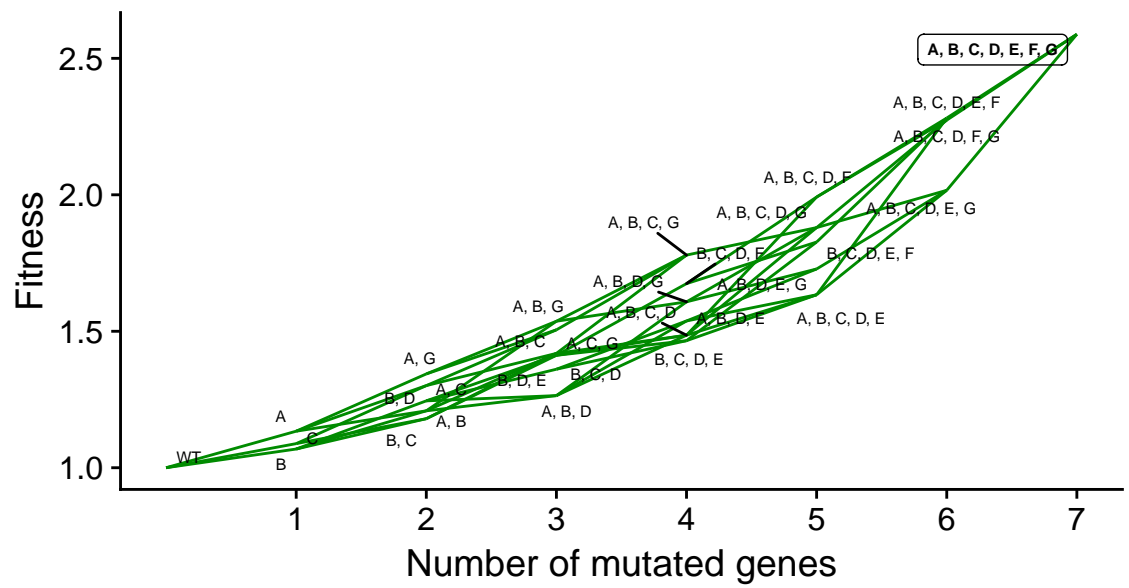

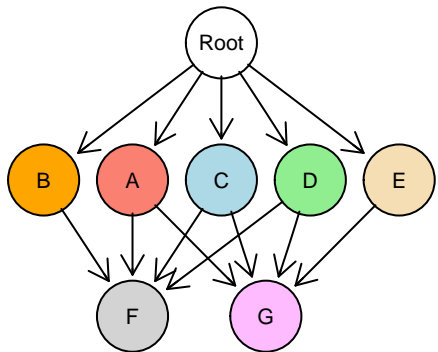

ID **h88O5DNbc34DtJm**  
 acc genotypes **37**  
 peaks no back **1**  
 removed edges **0**  
 prop rem edges **0**

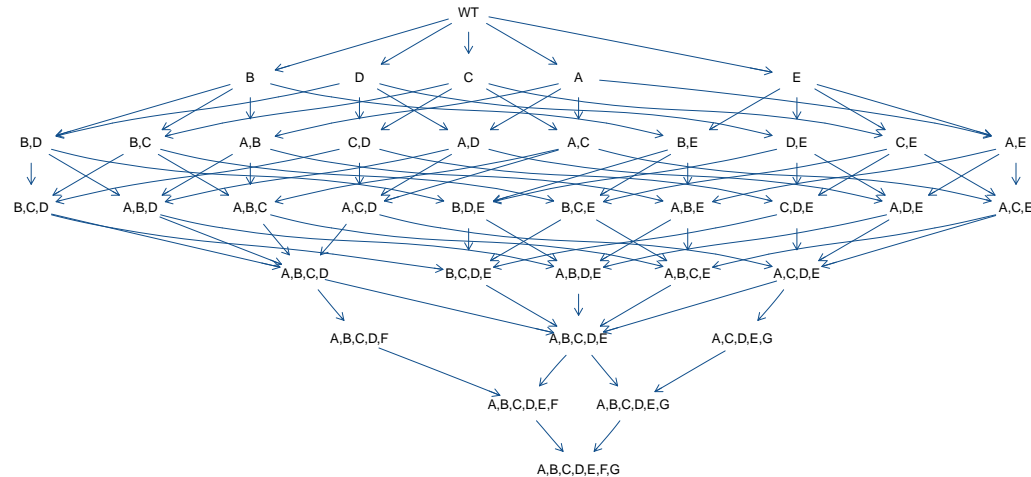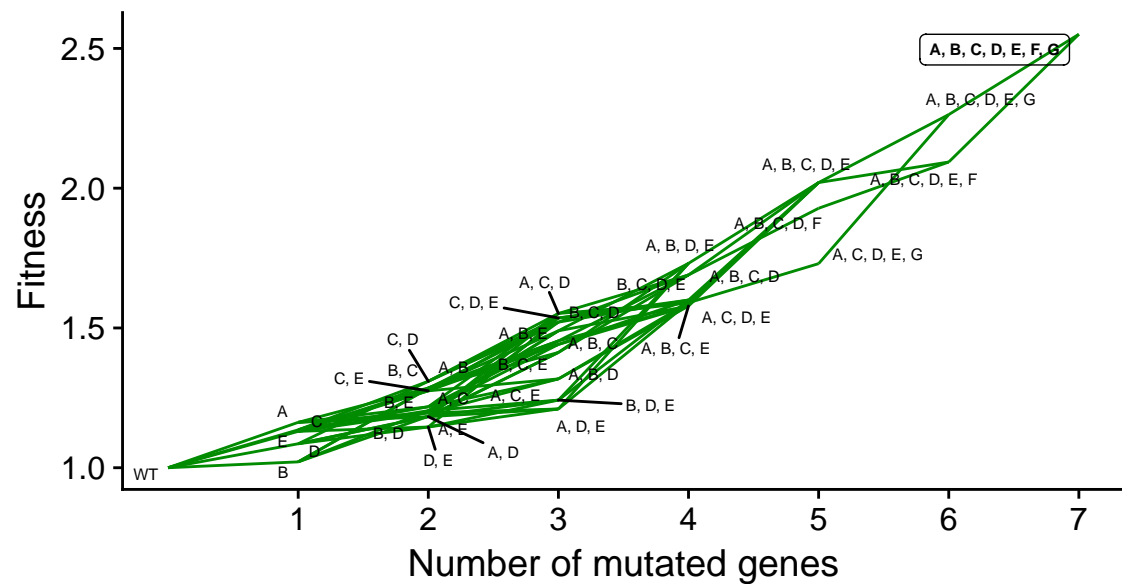

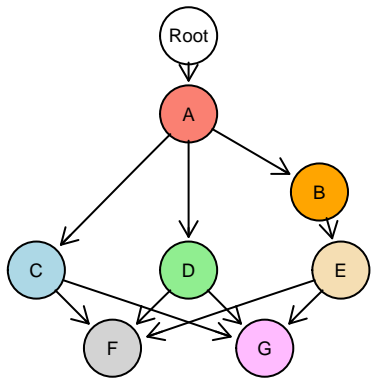

*ID* Hbk7A4ZWDH110Slas  
*acc genotypes* 16  
*peaks no back* 1  
*removed edges* 0  
*prop rem edges* 0

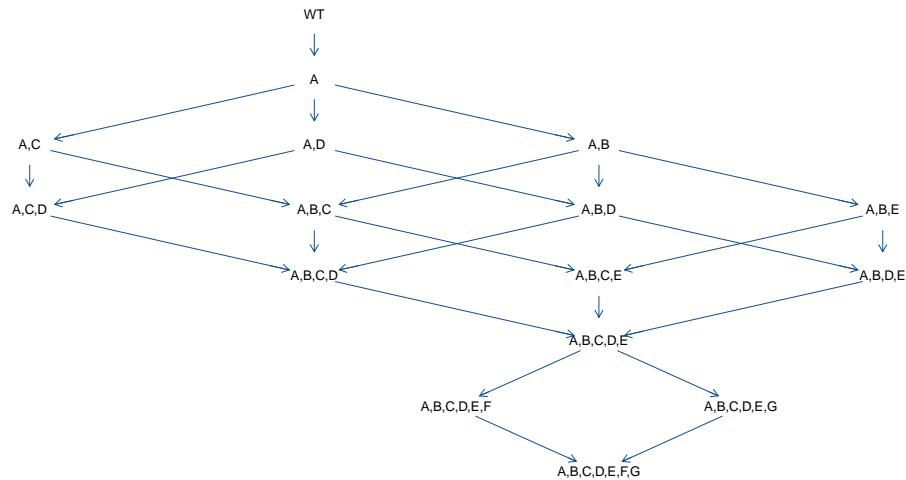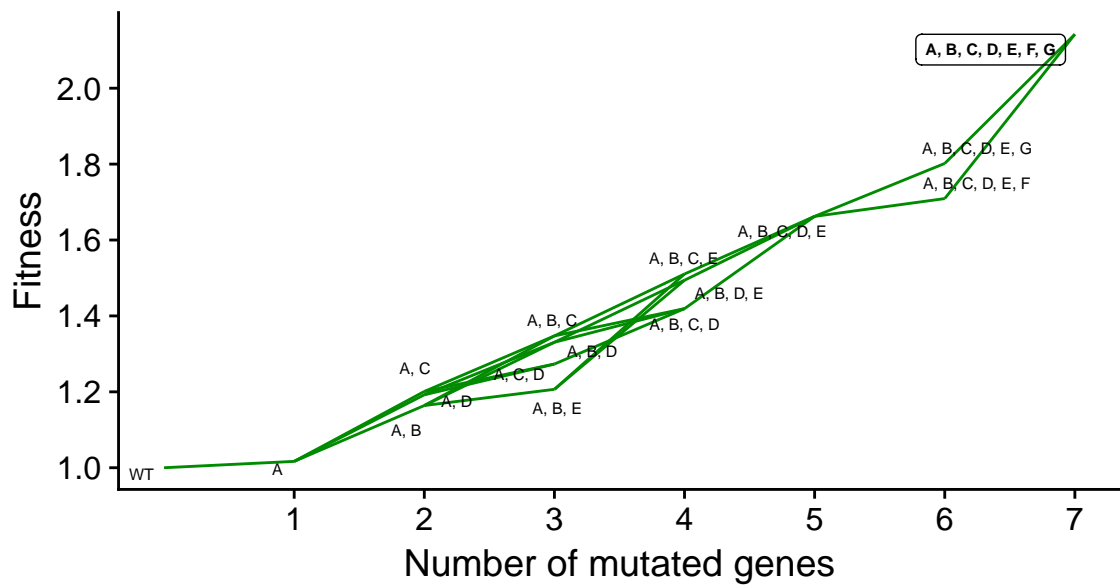



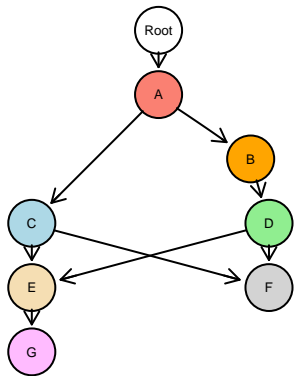

ID **HCfuosyRn2Mnwy2Y**  
 acc genotypes **12**  
 peaks no back **1**  
 removed edges **0**  
 prop rem edges **0**

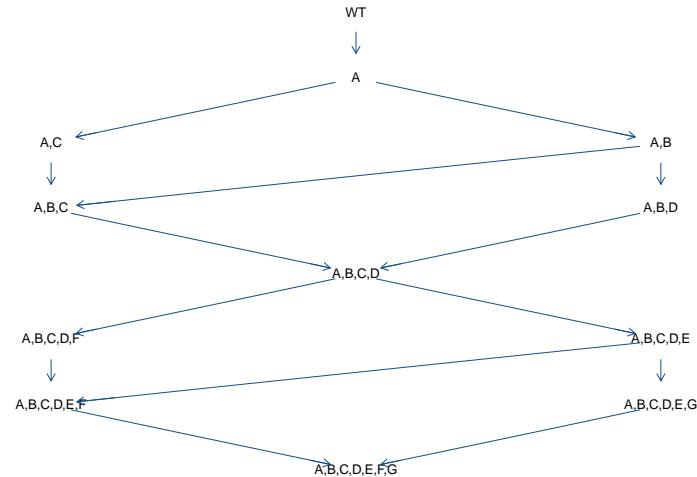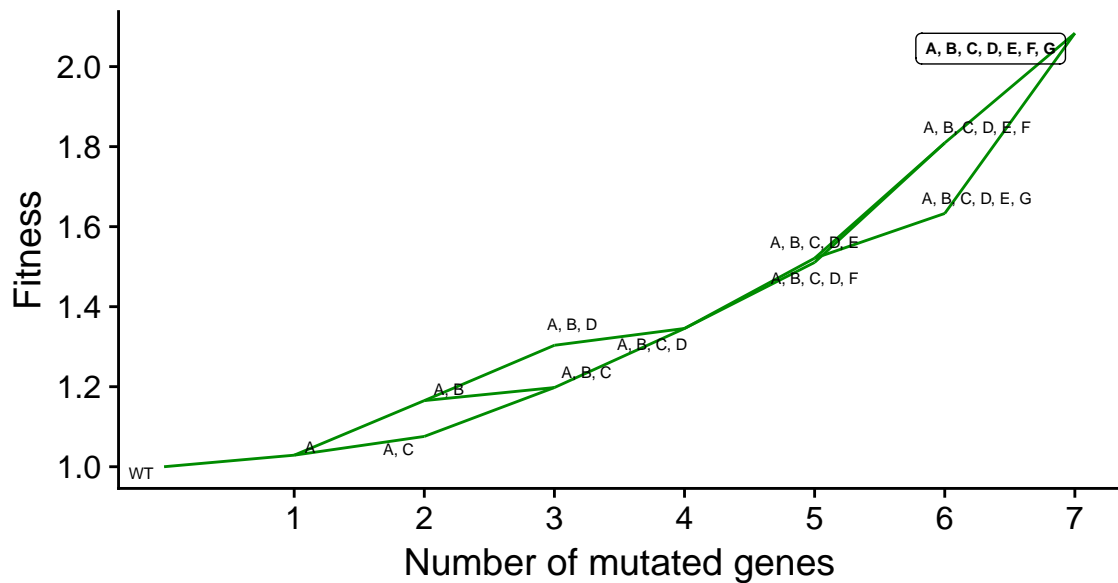

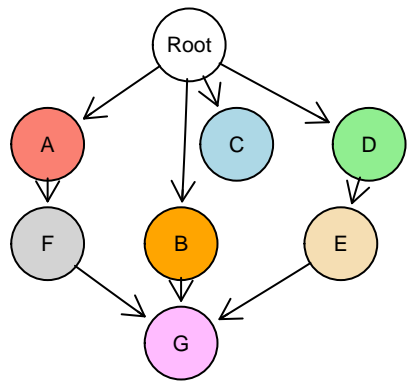

ID hEfL8MoVyBIRoMA  
 acc genotypes 38  
 peaks no back 1  
 removed edges 0  
 prop rem edges 0

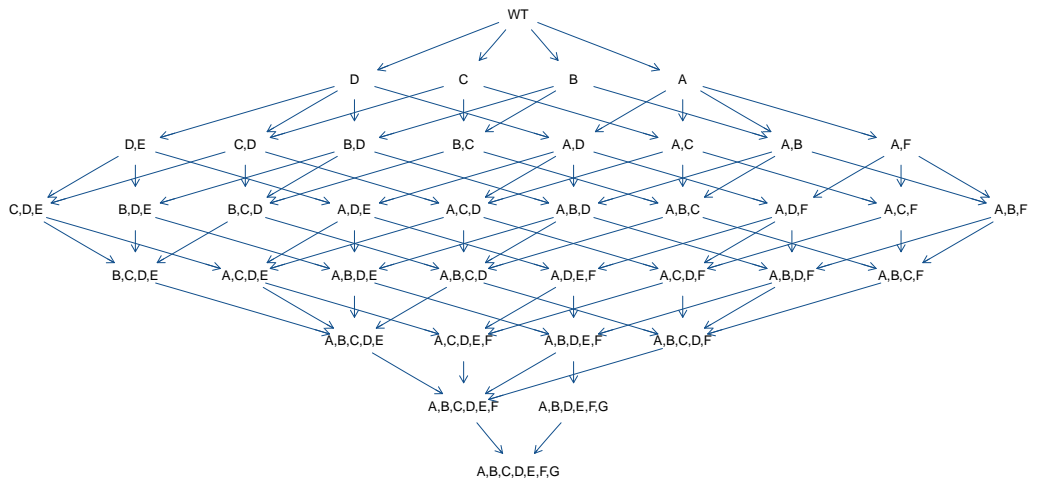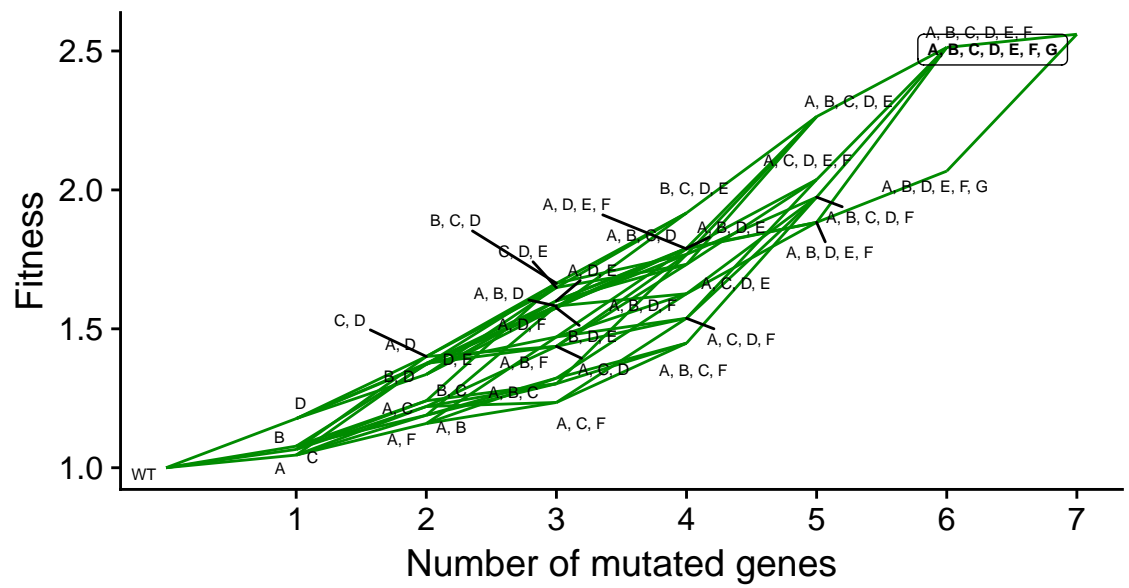

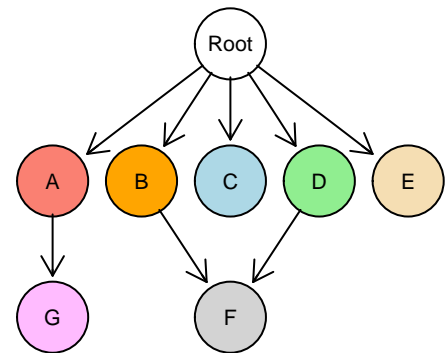

ID HF510IGzHhUvaK1Wc  
 acc genotypes 60  
 peaks no back 1  
 removed edges 0  
 prop rem edges 0

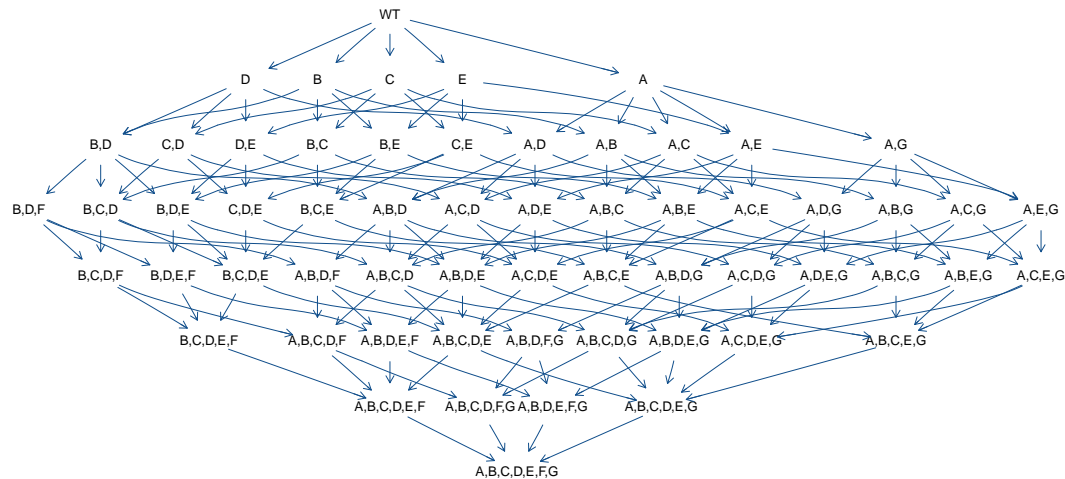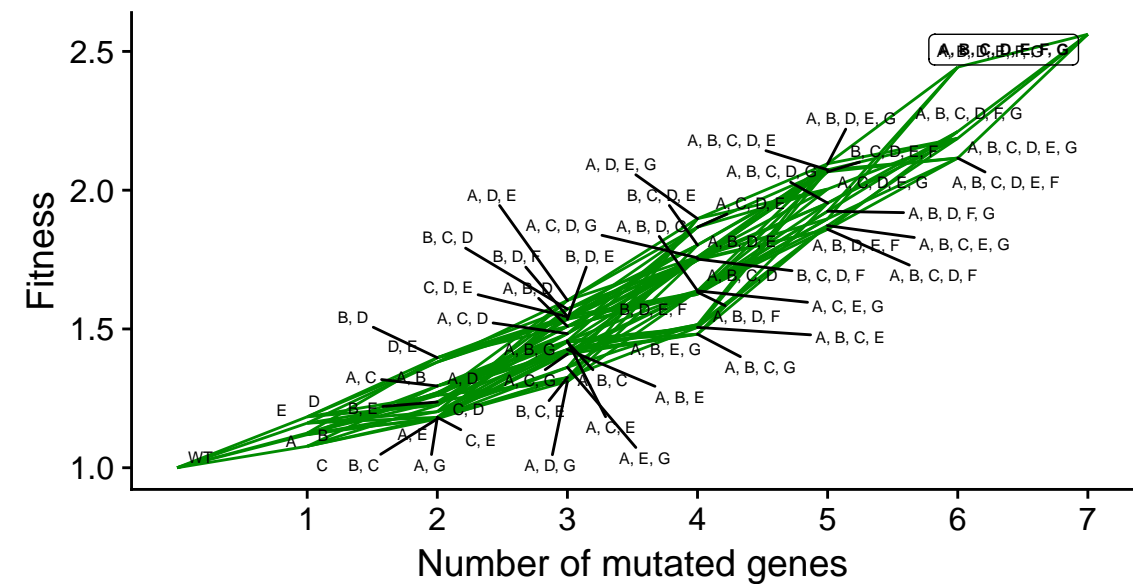

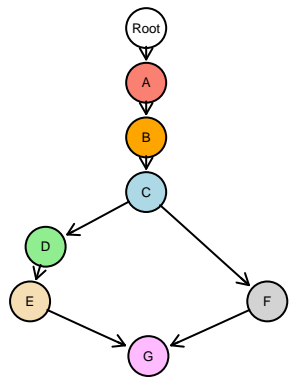

|                       |                  |
|-----------------------|------------------|
| <i>ID</i>             | HfNvtnFRbnBZJbsa |
| <i>acc genotypes</i>  | 10               |
| <i>peaks no back</i>  | 1                |
| <i>removed edges</i>  | 0                |
| <i>prop rem edges</i> | 0                |

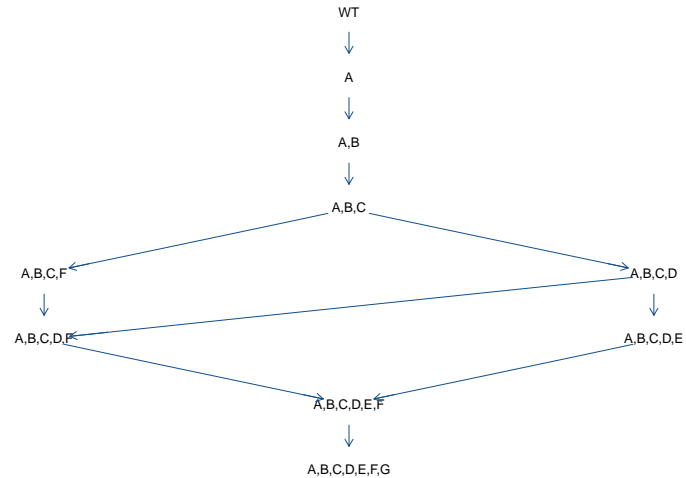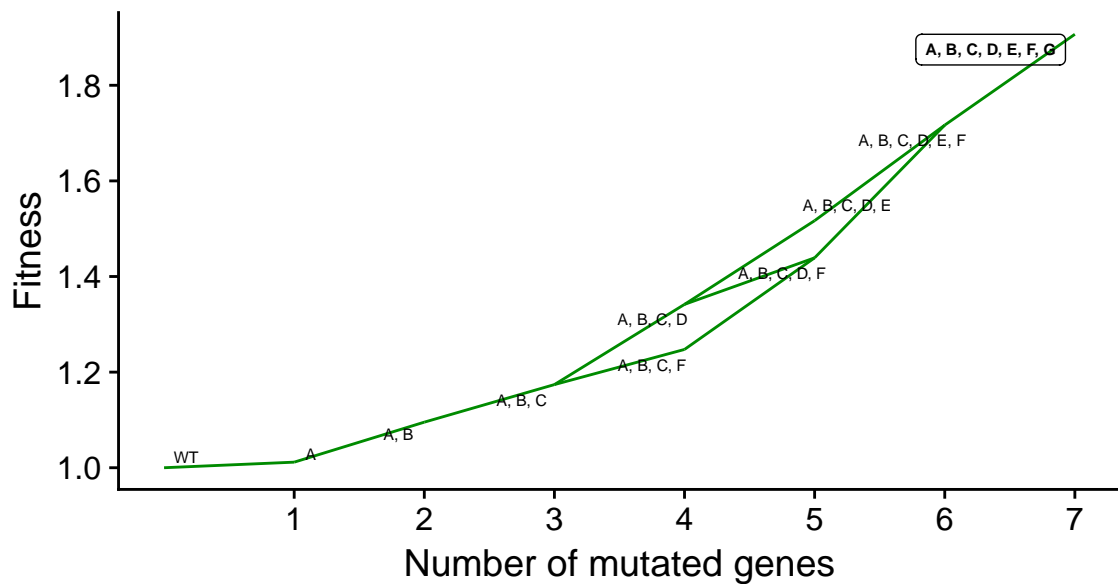

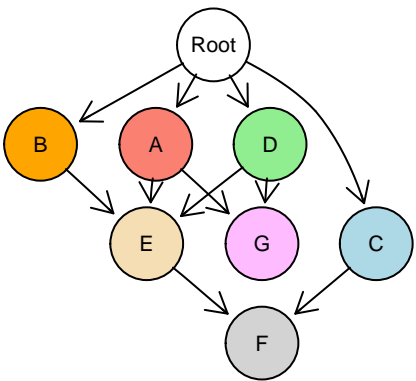

*ID* HGZXE3cU1toI8NwB  
*acc genotypes* 26  
*peaks no back* 1  
*removed edges* 0  
*prop rem edges* 0

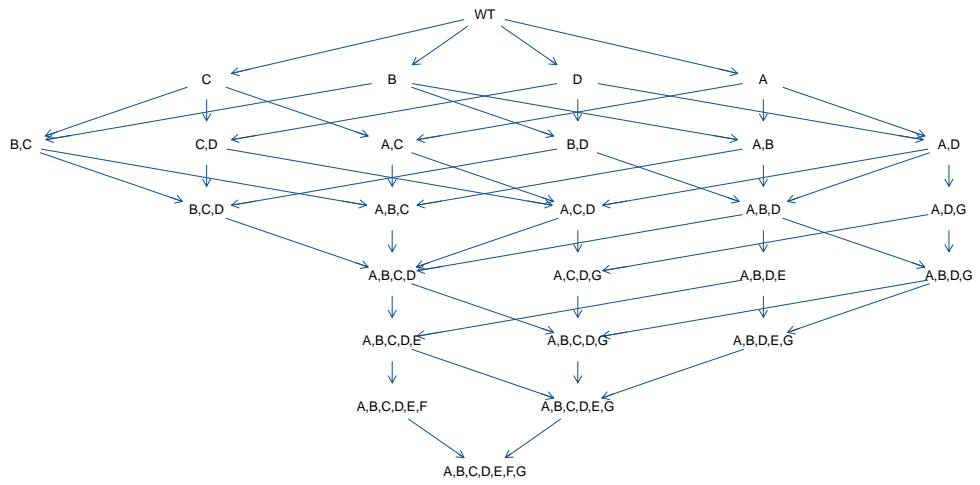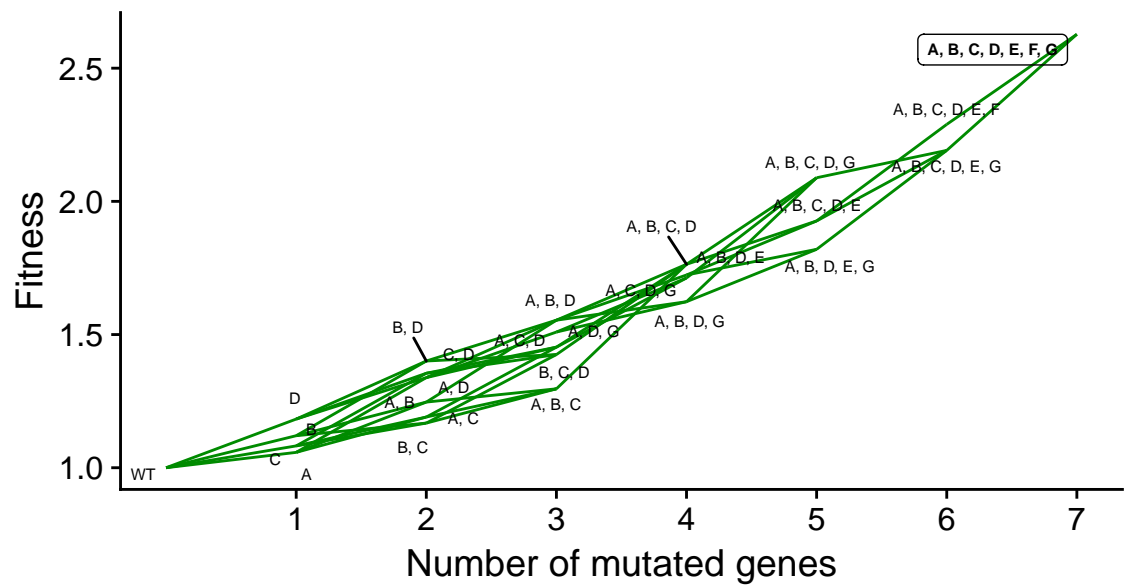

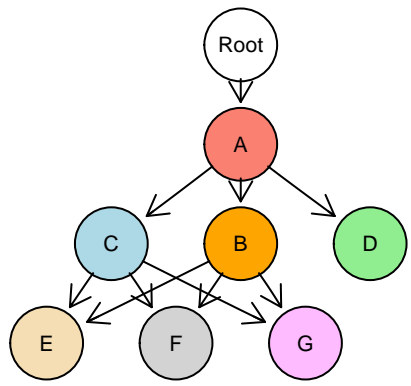

ID HhTnaJyFFi4y9Ptx  
 acc genotypes 23  
 peaks no back 1  
 removed edges 0  
 prop rem edges 0

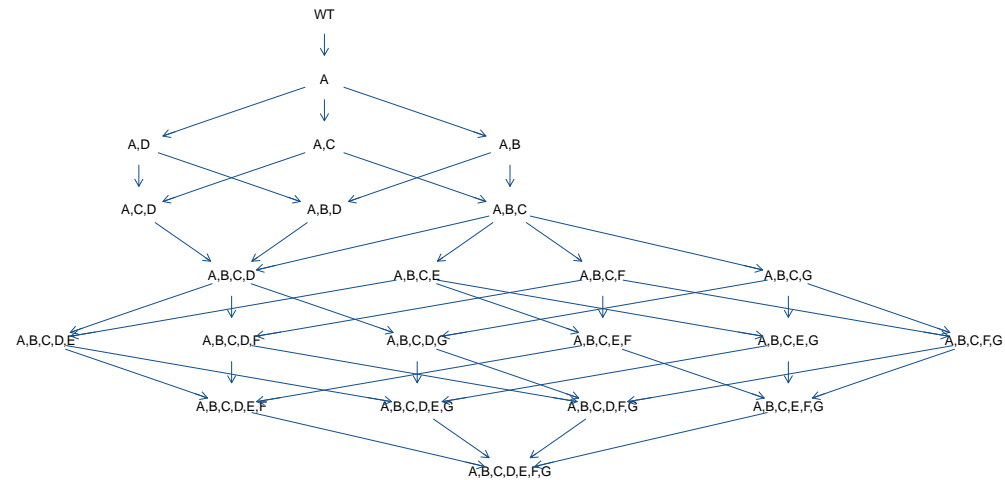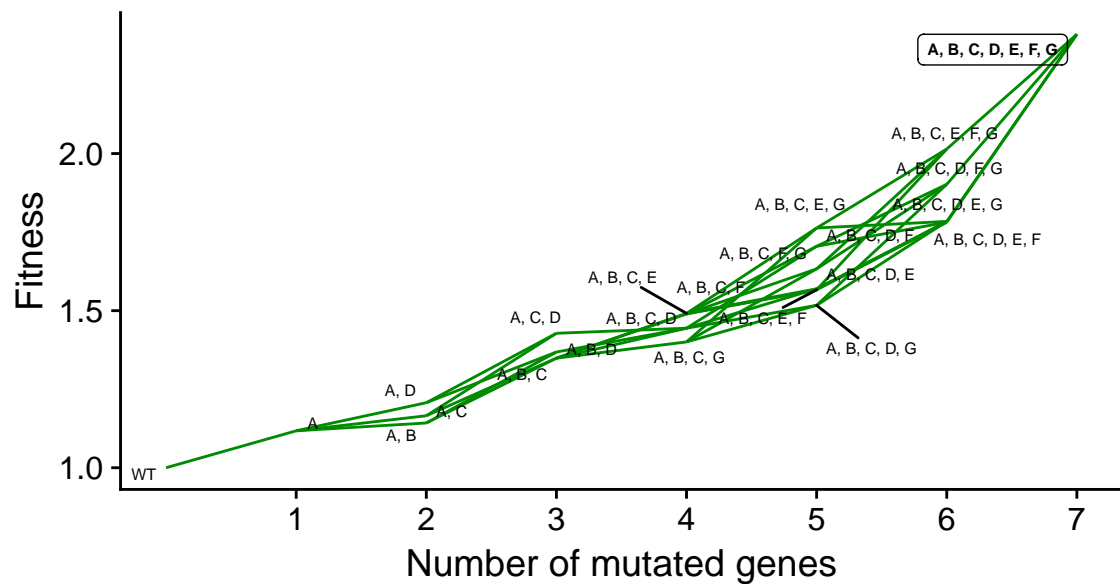

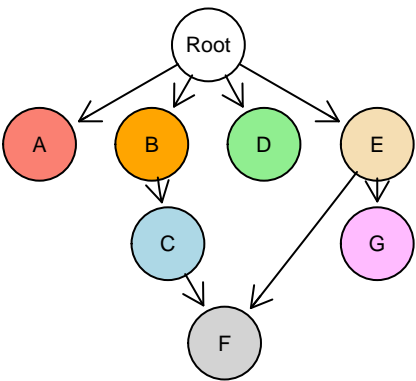

ID [hiqO72oQ9p210Vxcp](#)  
 acc genotypes 44  
 peaks no back 1  
 removed edges 0  
 prop rem edges 0

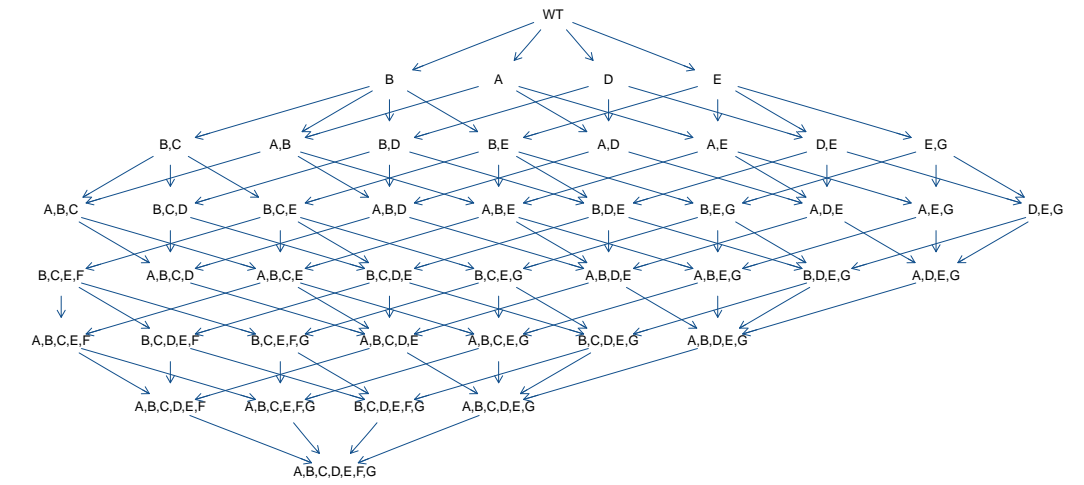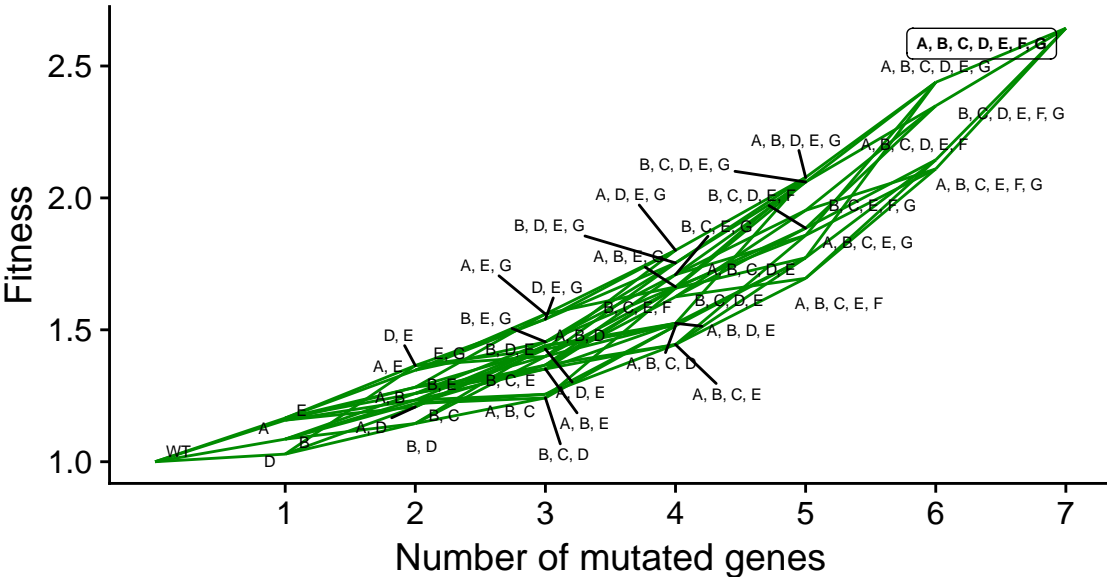

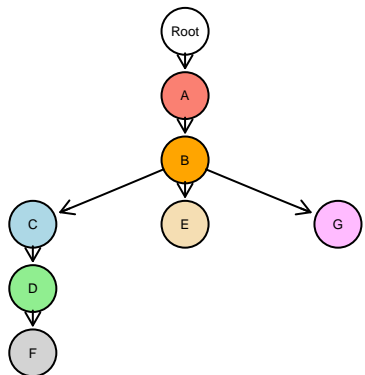

ID **hTuov2KGeLAlrrac**  
 acc genotypes **18**  
 peaks no back **1**  
 removed edges **0**  
 prop rem edges **0**

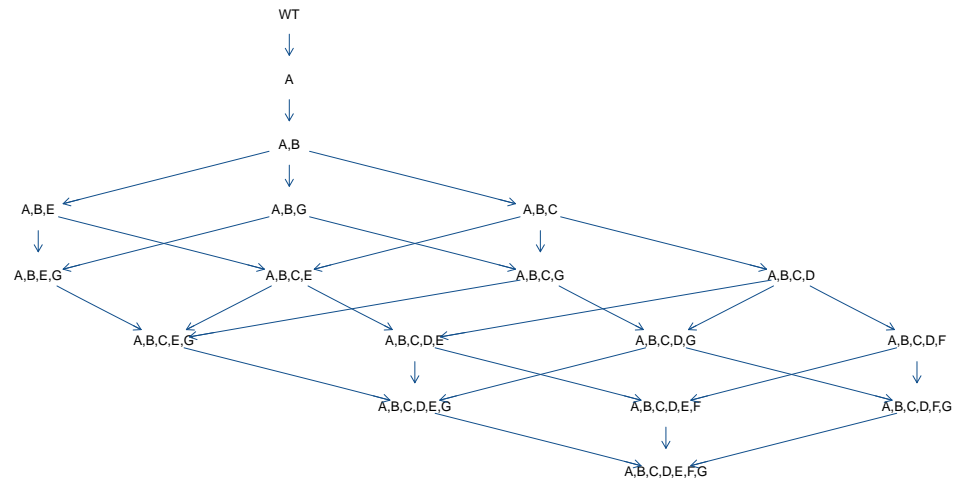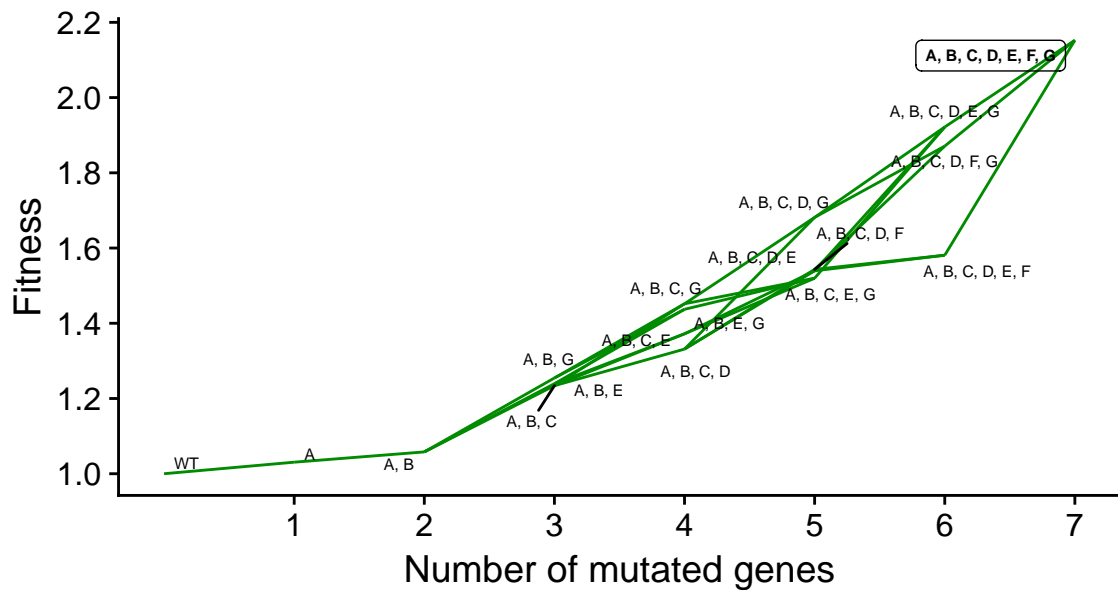



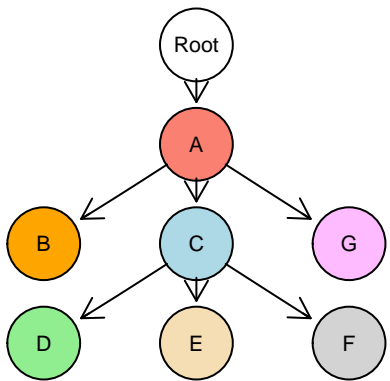

*ID* **hyGvt7bXxXmBy4c**  
*acc genotypes* **37**  
*peaks no back* **1**  
*removed edges* **0**  
*prop rem edges* **0**

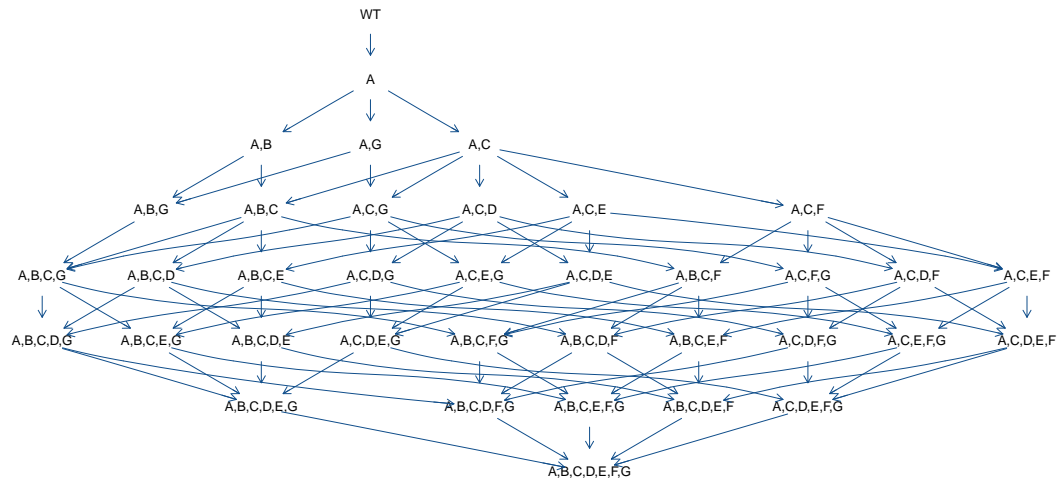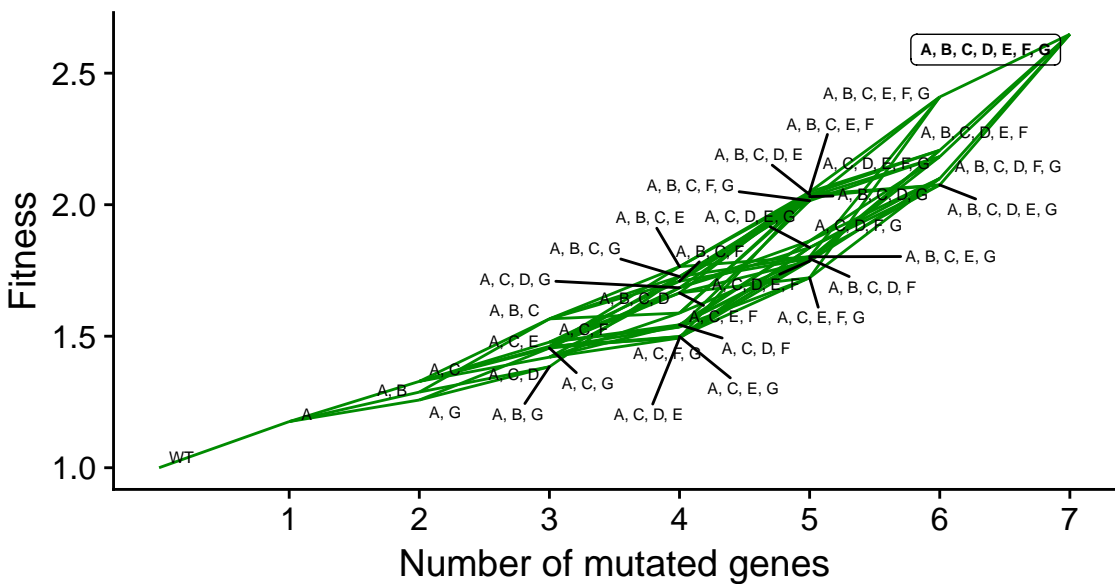

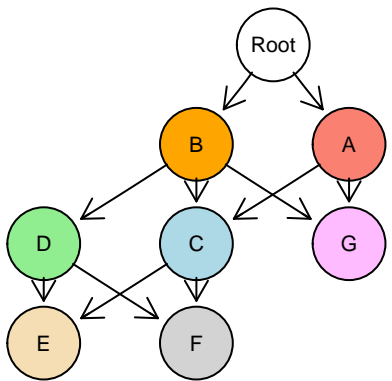

ID HYyO10PwiQqDuWK2r  
 acc genotypes 18  
 peaks no back 1  
 removed edges 0  
 prop rem edges 0

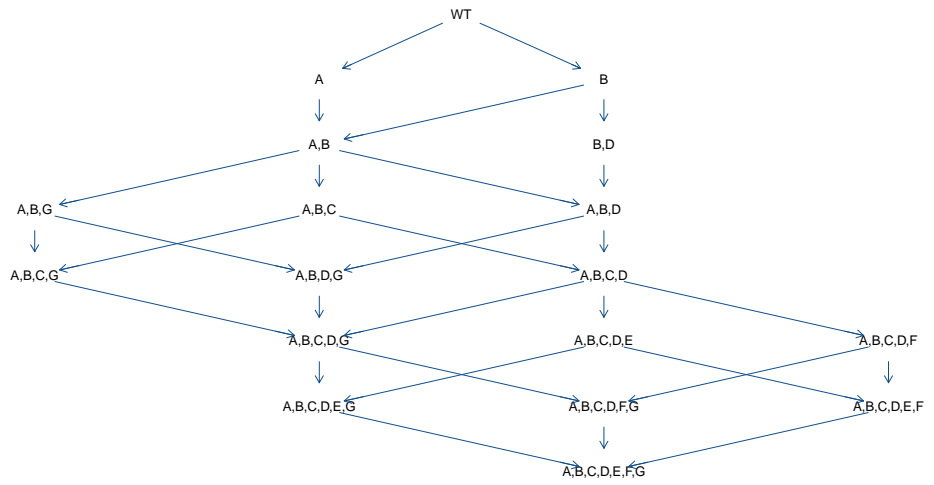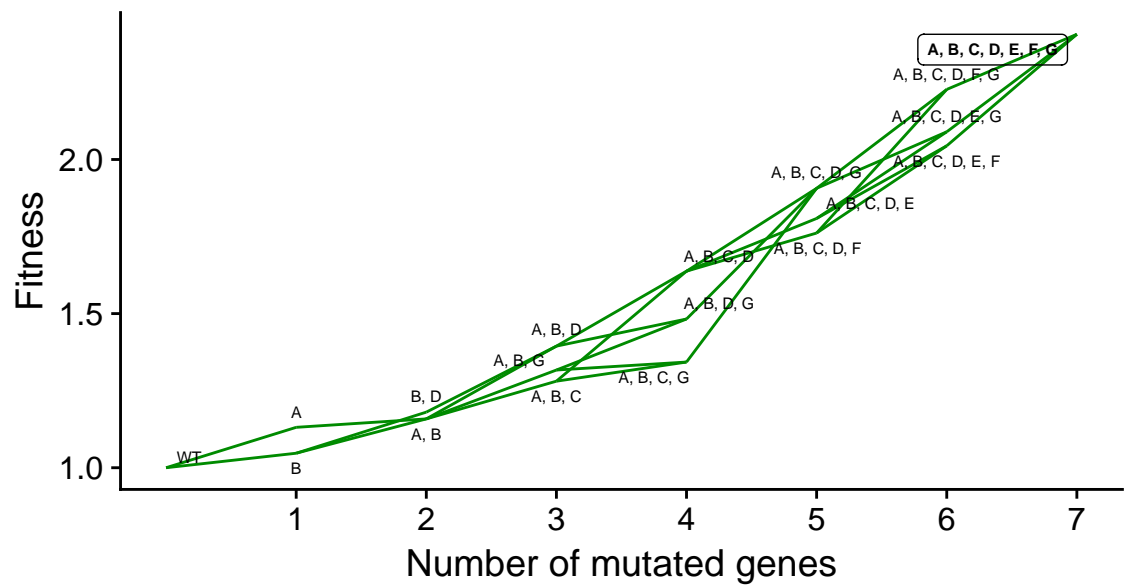

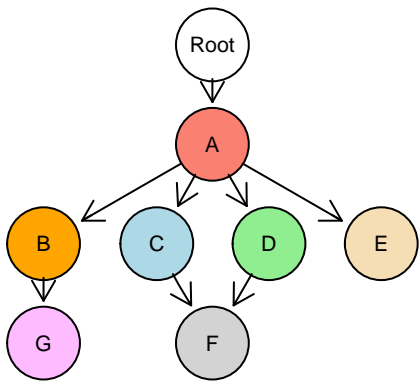

ID IFOFBmVbzrLBfqR1  
 acc genotypes 31  
 peaks no back 1  
 removed edges 0  
 prop rem edges 0

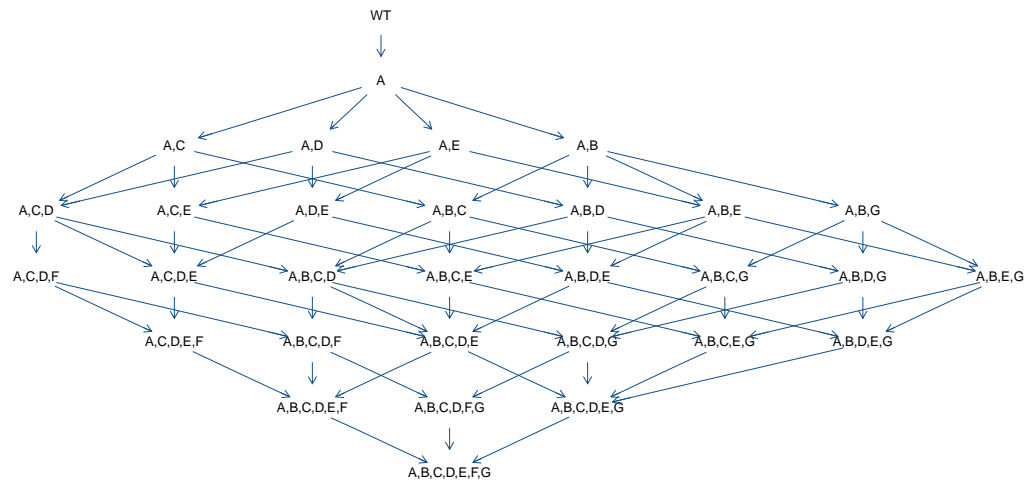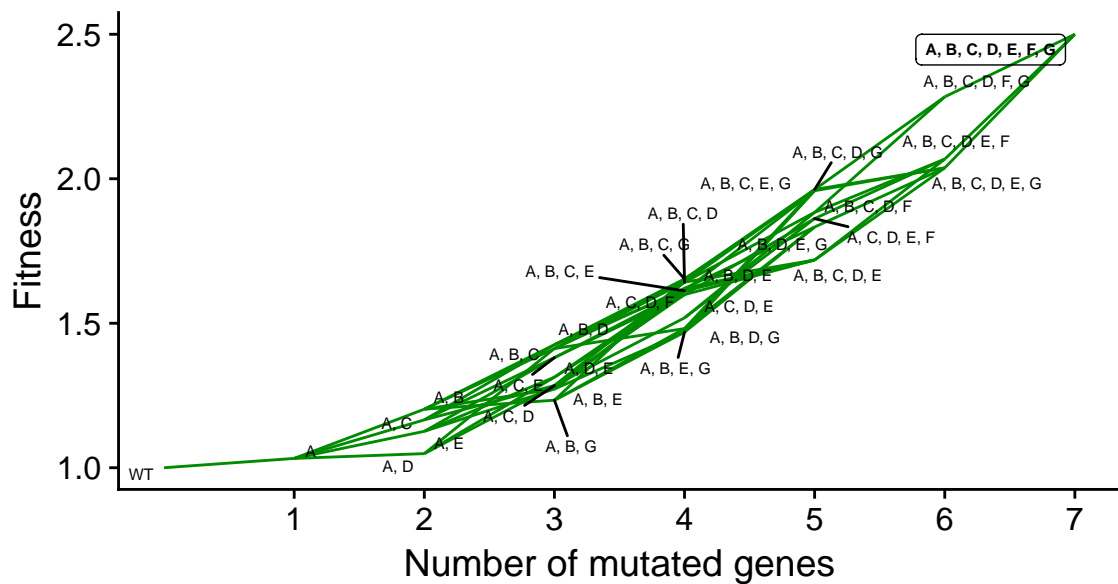

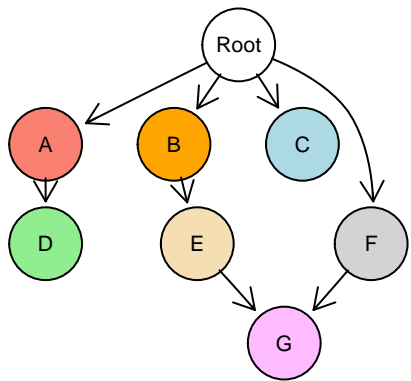

*ID* IJ15PYr1XTbhonDL  
*acc genotypes* 42  
*peaks no back* 1  
*removed edges* 0  
*prop rem edges* 0

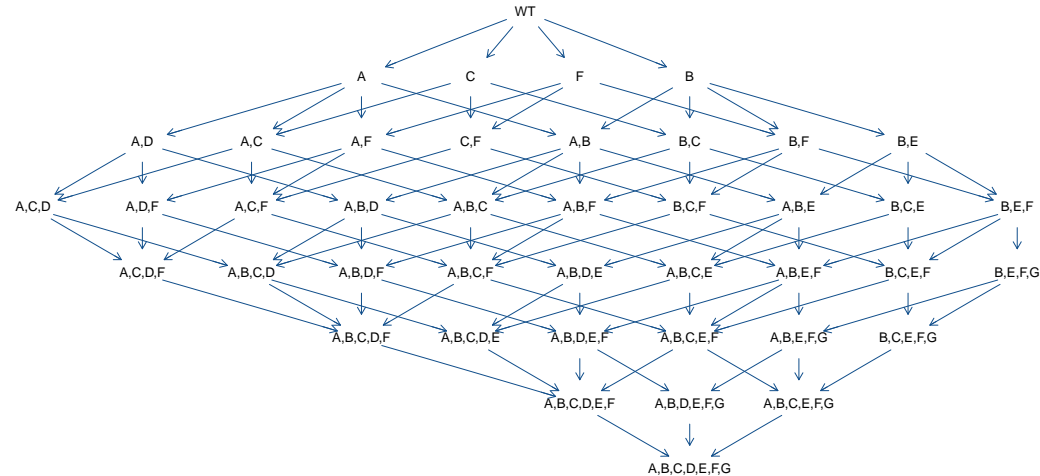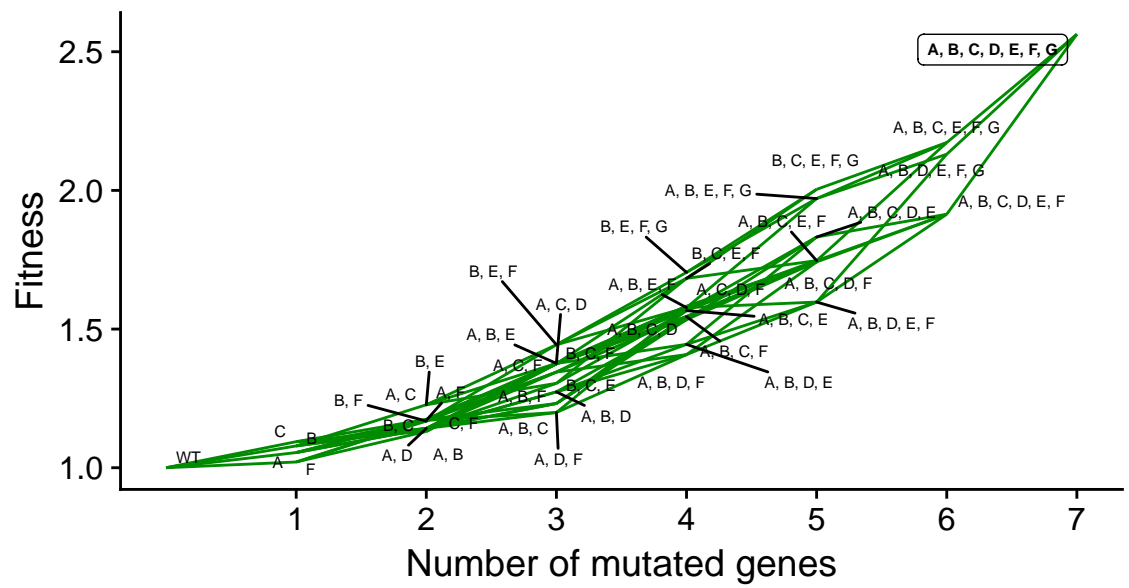

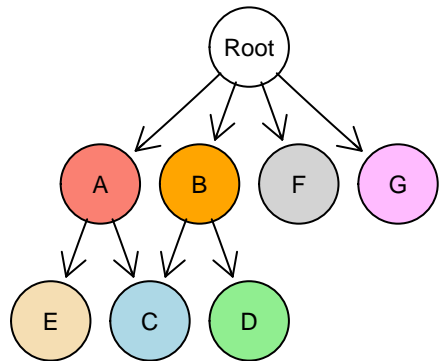

*ID* iKHz2mPyuFYjaiPo  
*acc genotypes* 52  
*peaks no back* 1  
*removed edges* 0  
*prop rem edges* 0

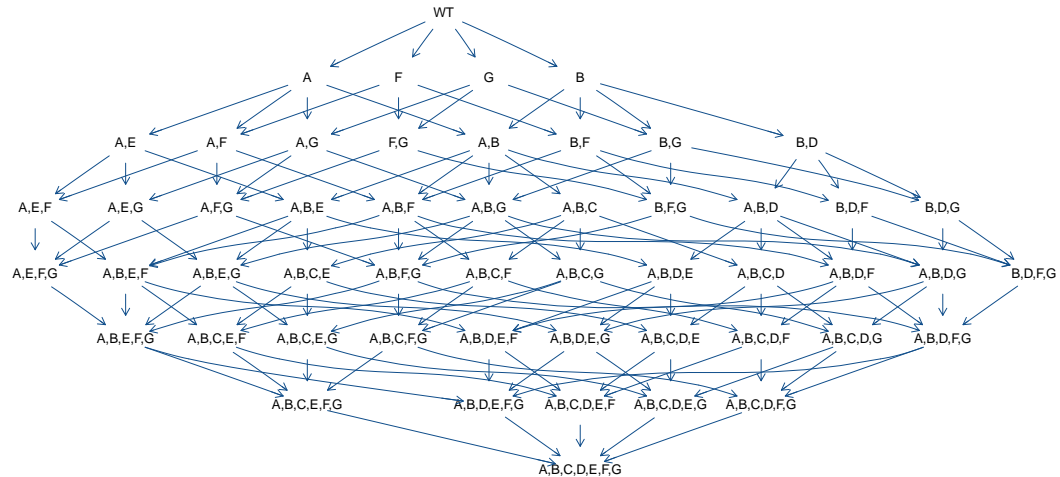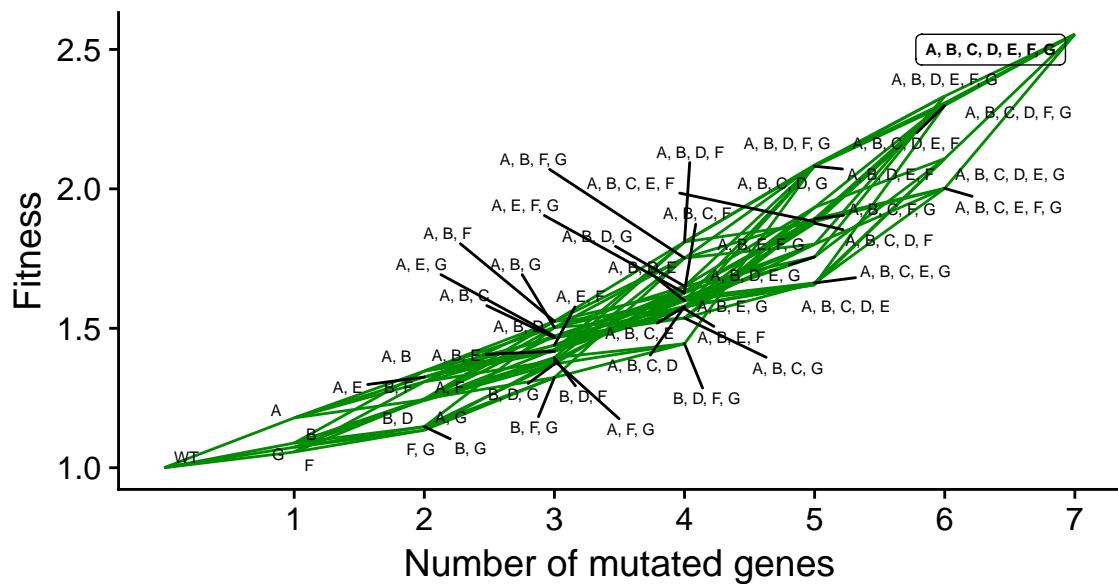

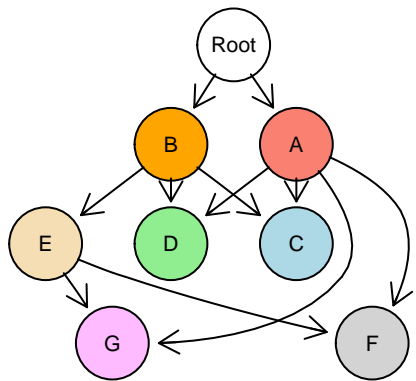

*ID* imGyIoiov7jJGQPM  
*acc genotypes* 24  
*peaks no back* 1  
*removed edges* 0  
*prop rem edges* 0

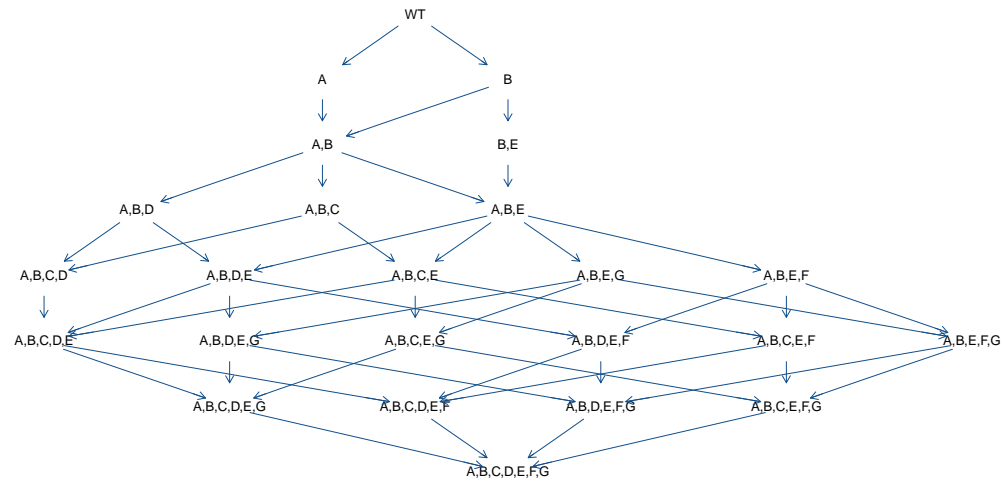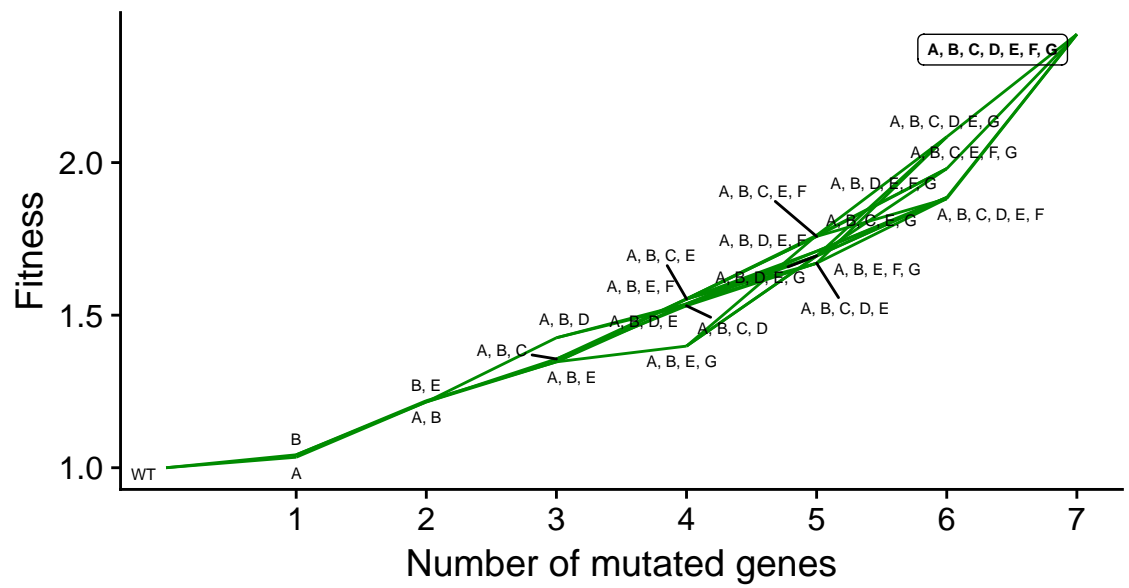

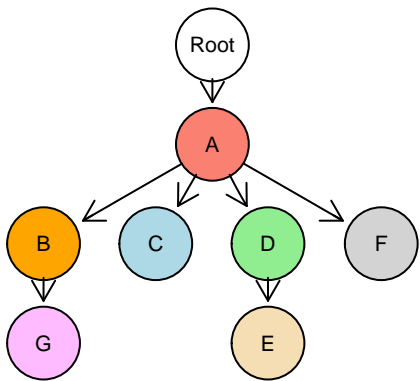

*ID* Iq2ILDZ3MG3ndder  
*acc genotypes* 37  
*peaks no back* 1  
*removed edges* 0  
*prop rem edges* 0

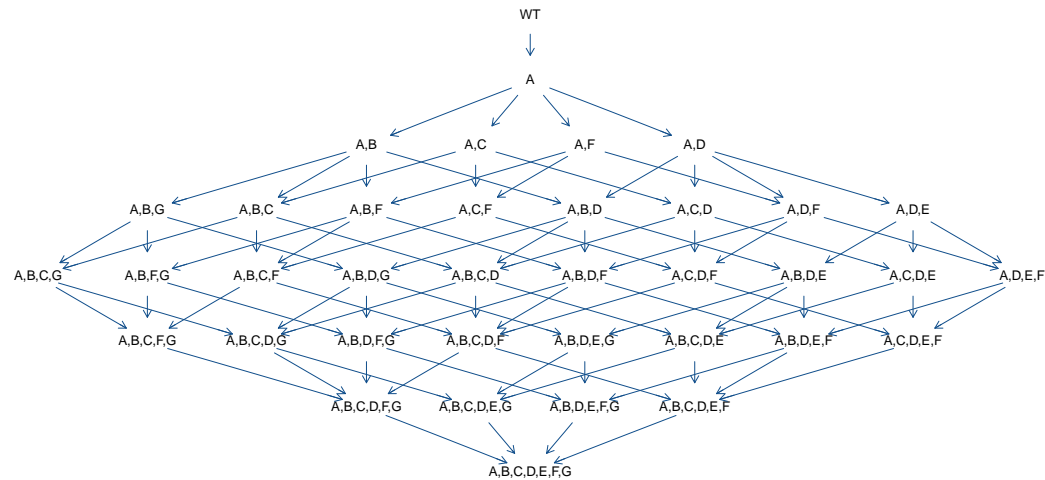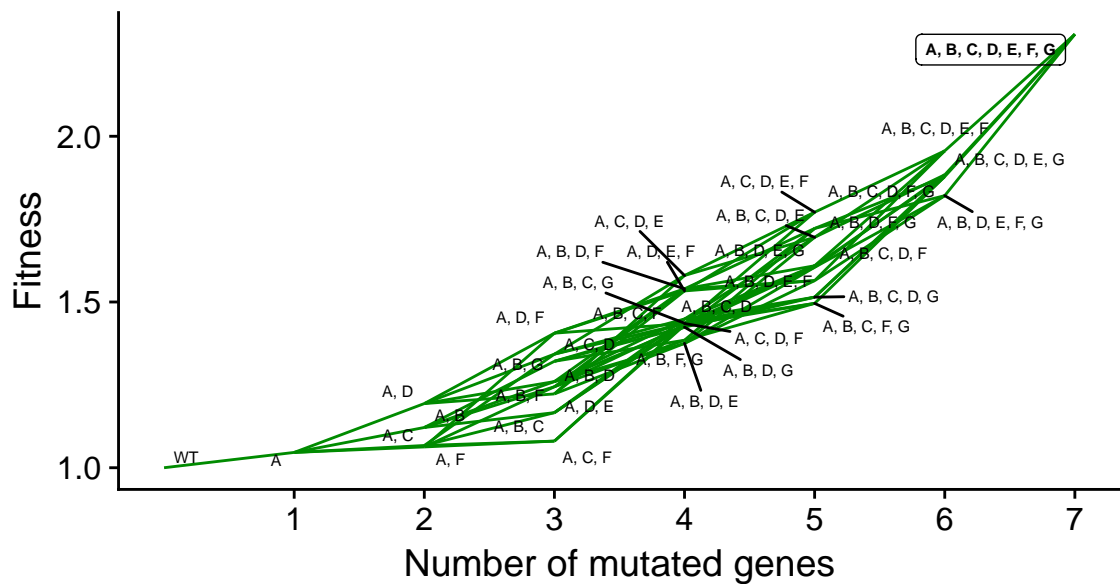

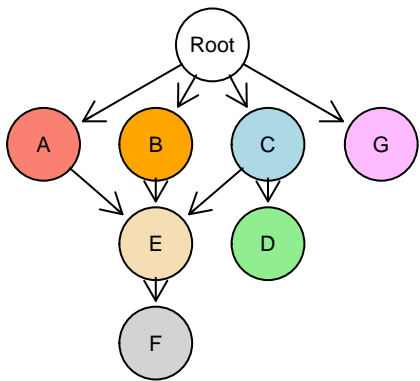

*ID* IRpnRnTLcDvmGnyE  
*acc genotypes* 32  
*peaks no back* 1  
*removed edges* 0  
*prop rem edges* 0

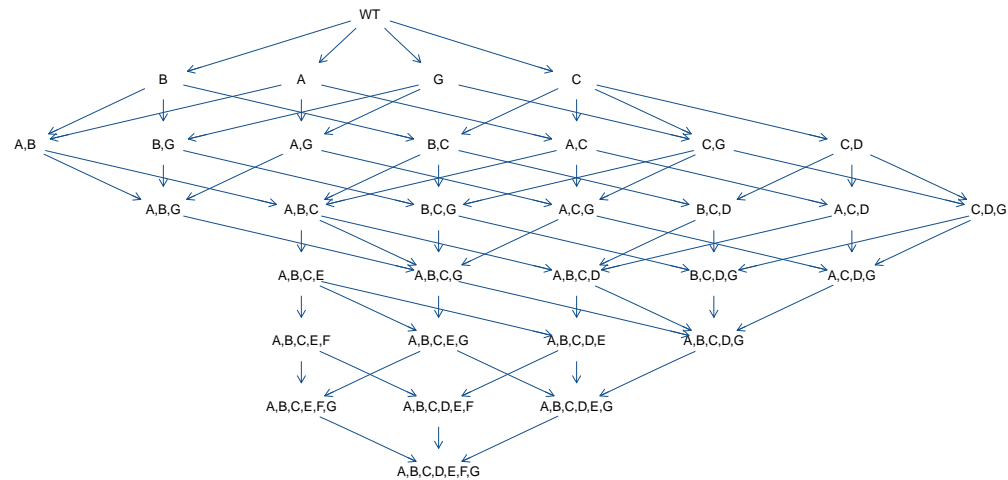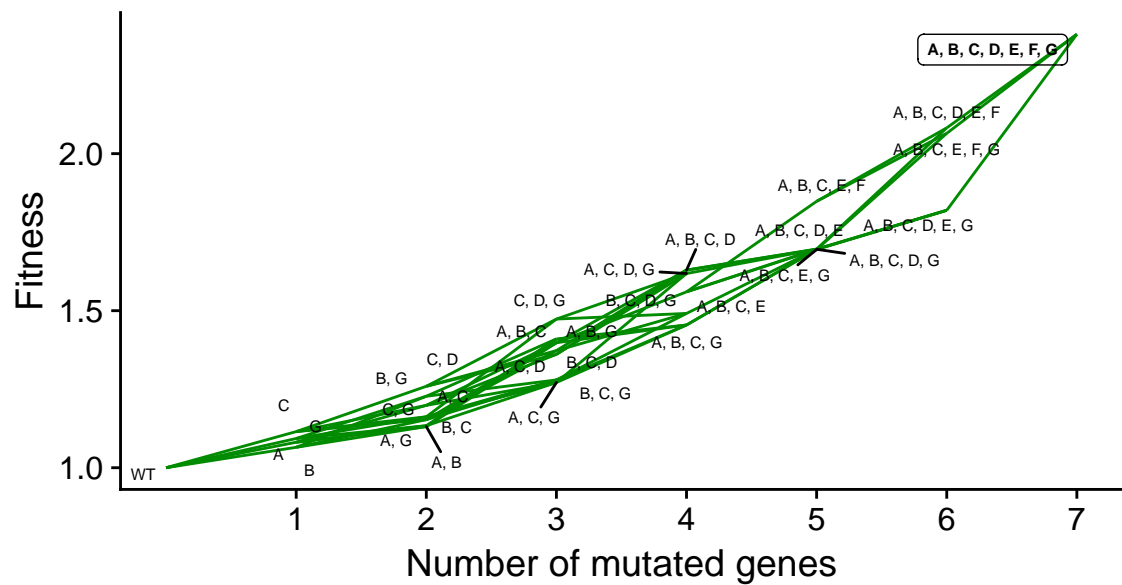



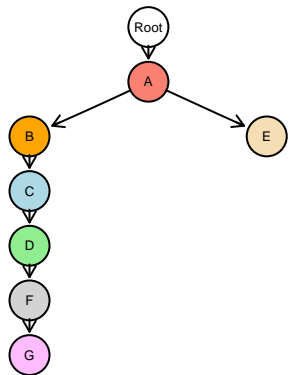

*ID* iU2gBfqvhEyguOWr  
*acc genotypes* 13  
*peaks no back* 1  
*removed edges* 0  
*prop rem edges* 0

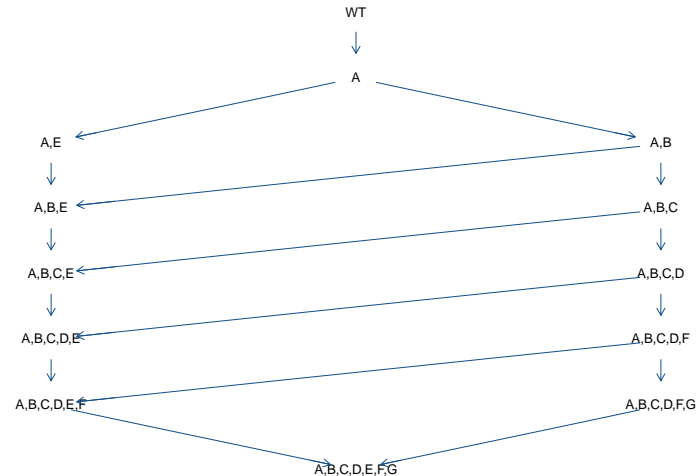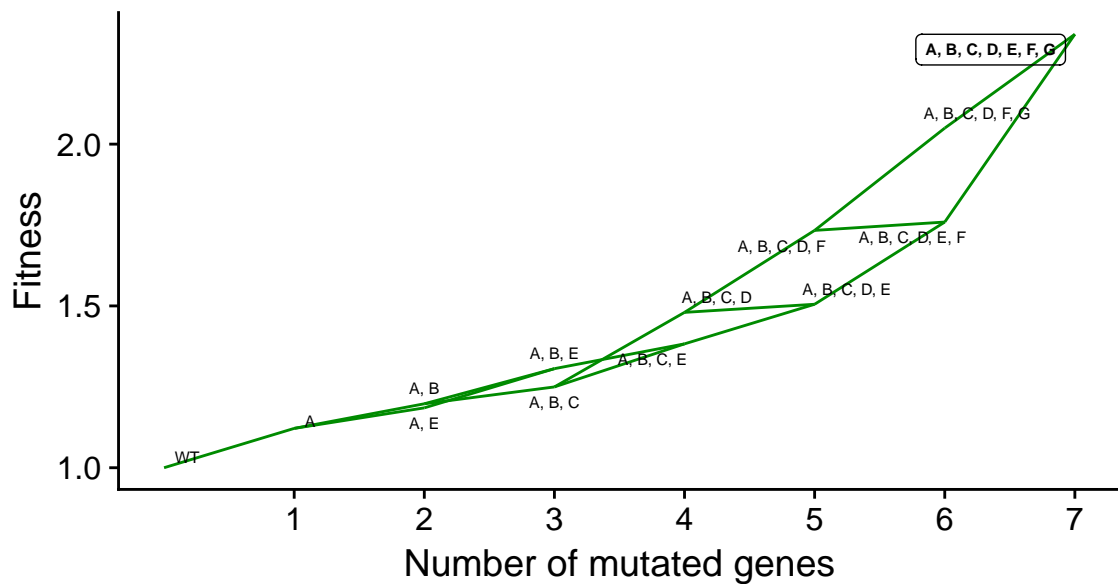





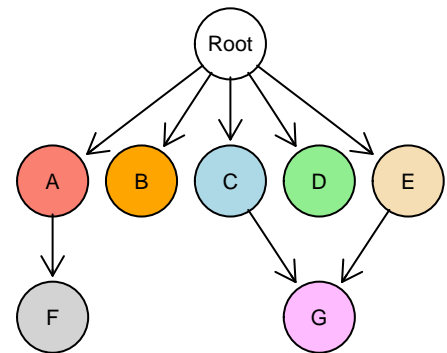

ID **j5YLGuLuDa6cvNb2**  
 acc genotypes **60**  
 peaks no back **1**  
 removed edges **0**  
 prop rem edges **0**

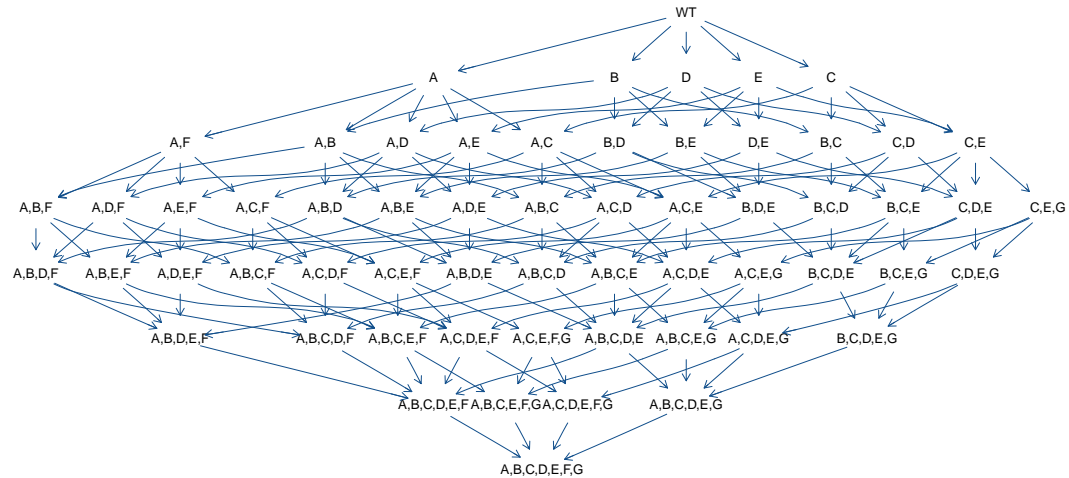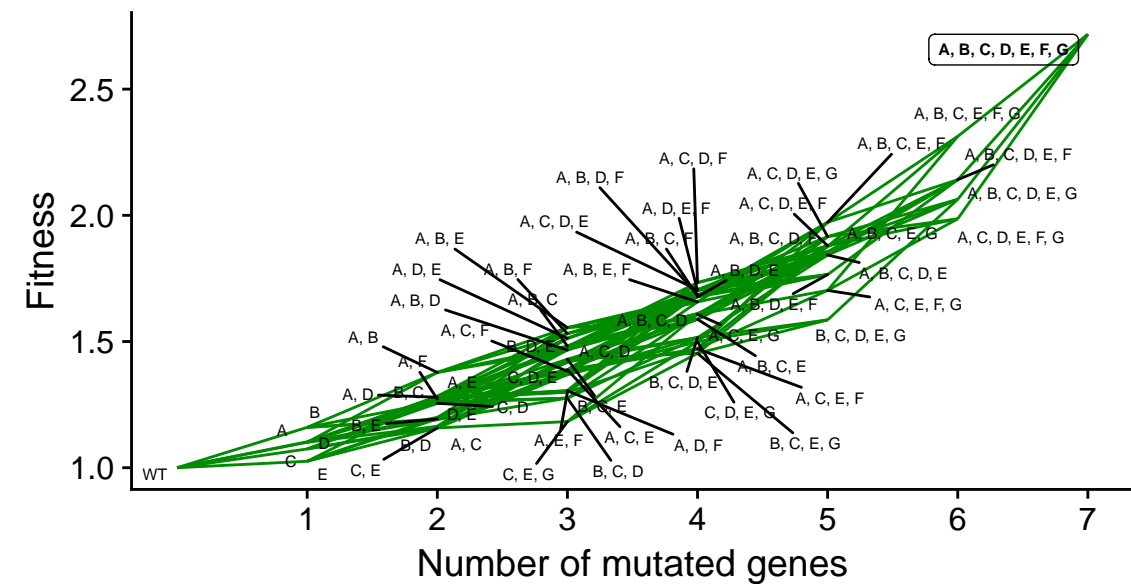

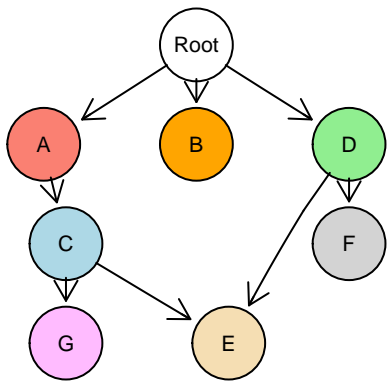

ID **J6ltoaqms6HlPc7B**  
 acc genotypes **32**  
 peaks no back **1**  
 removed edges **0**  
 prop rem edges **0**

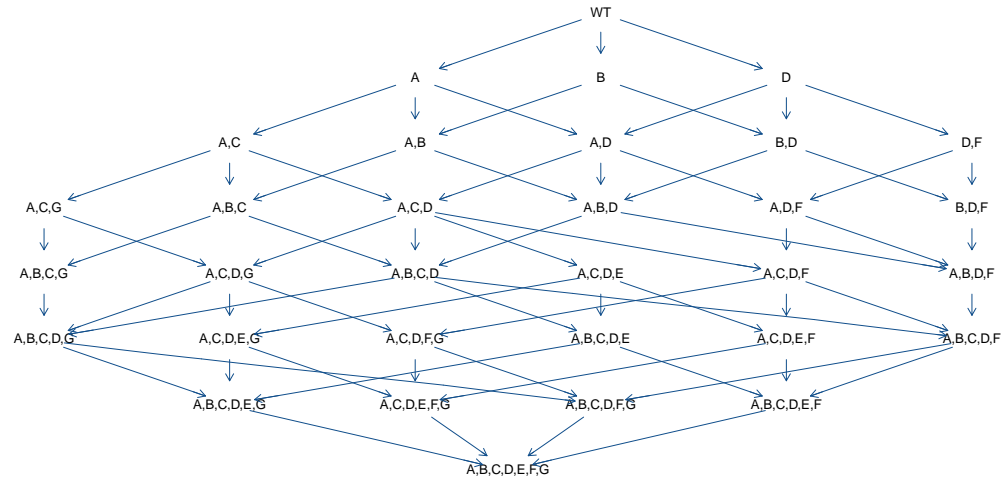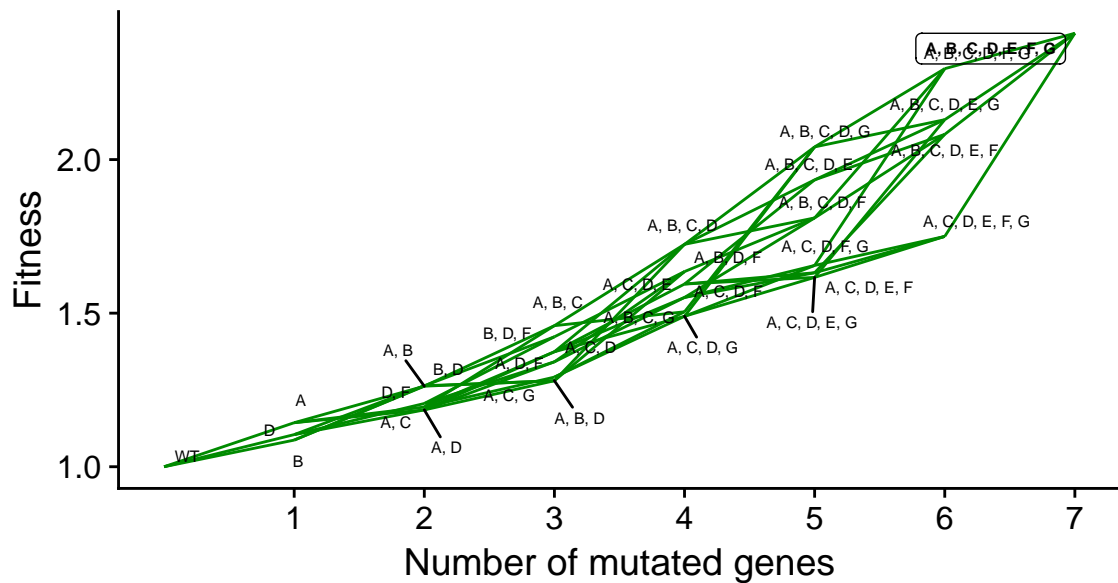

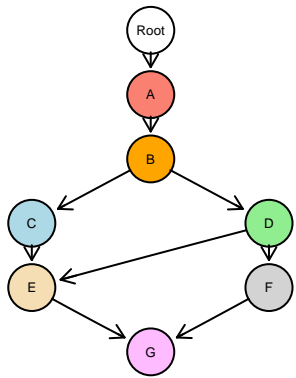

ID [j71sbZK1fQ6ihd8O](#)  
 acc genotypes 11  
 peaks no back 1  
 removed edges 0  
 prop rem edges 0

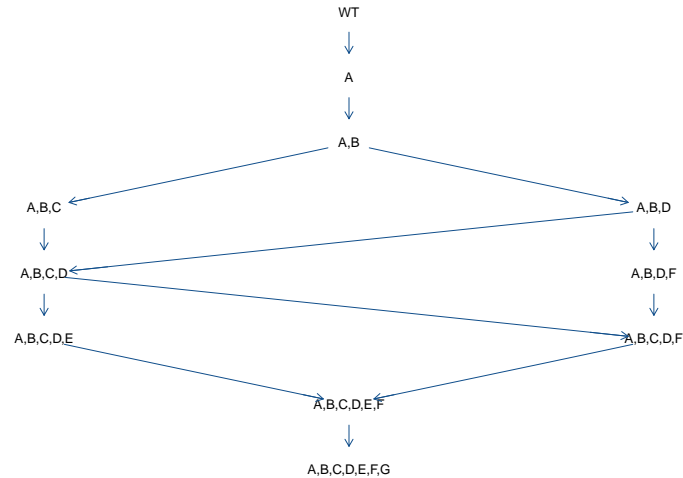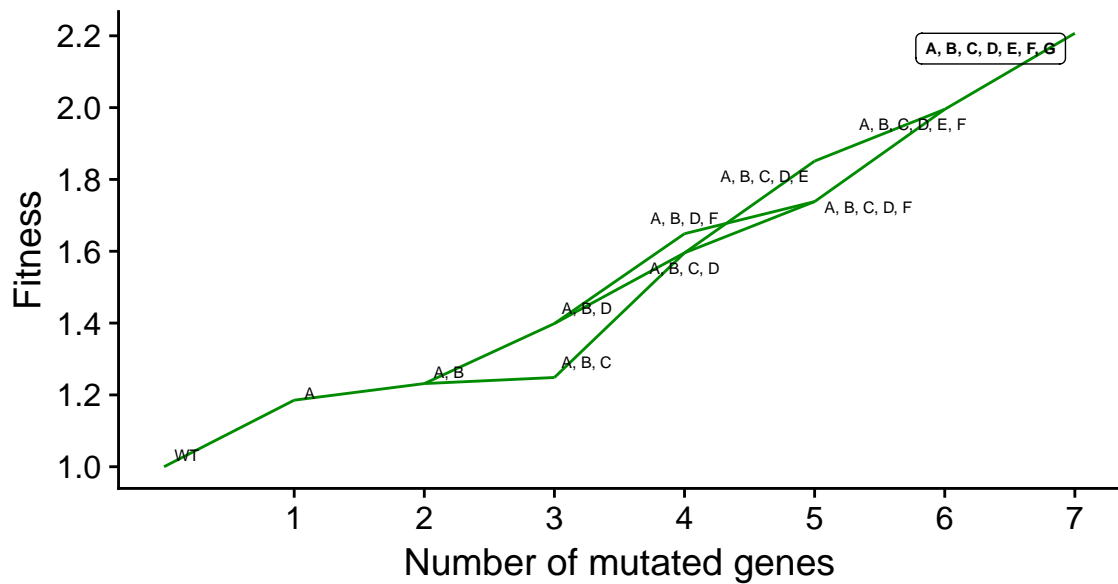

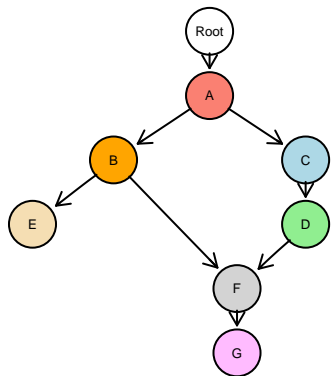

*ID* JLERmKvl2w2lquvc  
*acc genotypes* 14  
*peaks no back* 1  
*removed edges* 0  
*prop rem edges* 0

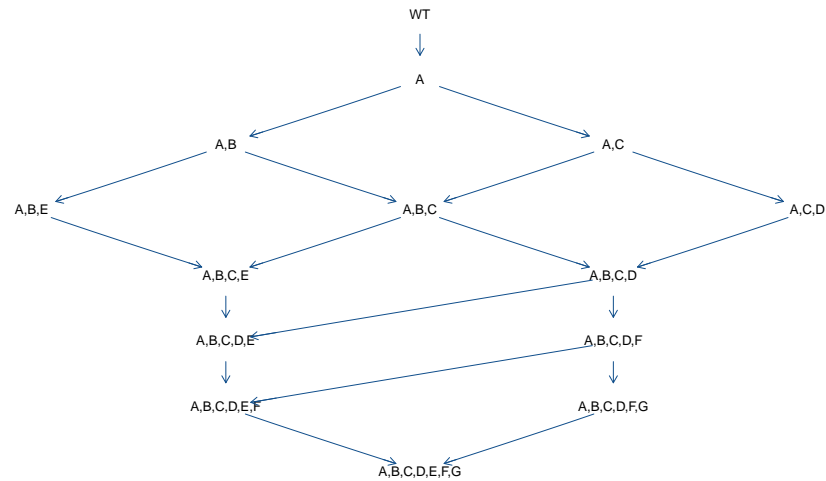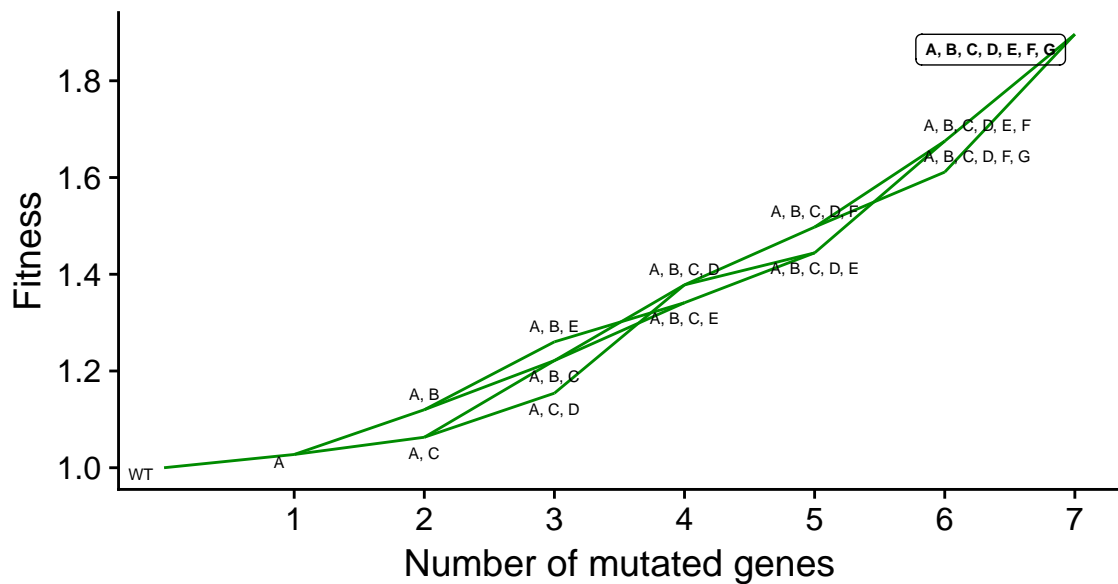

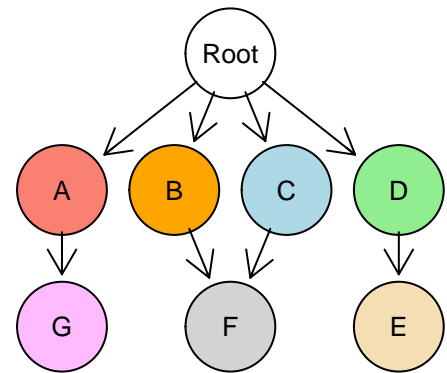

*ID* JoTSpt4LngDDMASj  
*acc genotypes* 45  
*peaks no back* 1  
*removed edges* 0  
*prop rem edges* 0

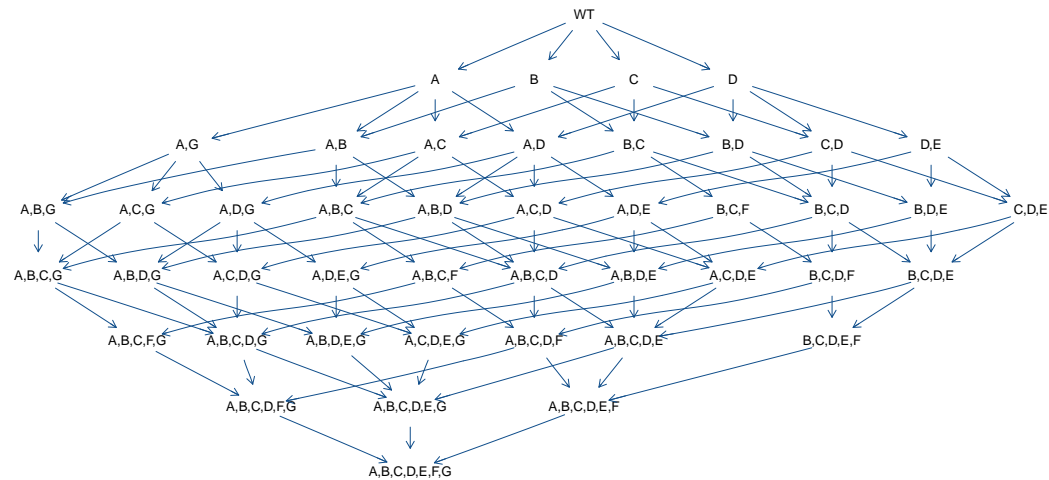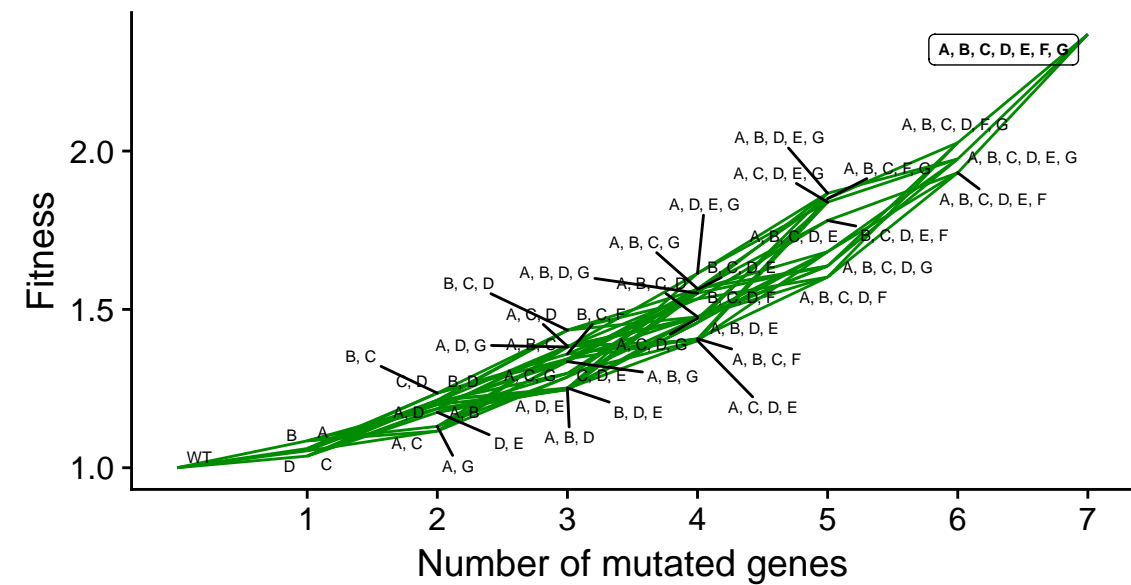



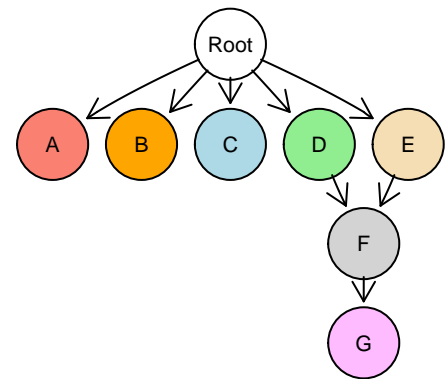

ID [jq7mqYXKFpls2uXm](#)  
 acc genotypes 48  
 peaks no back 1  
 removed edges 0  
 prop rem edges 0

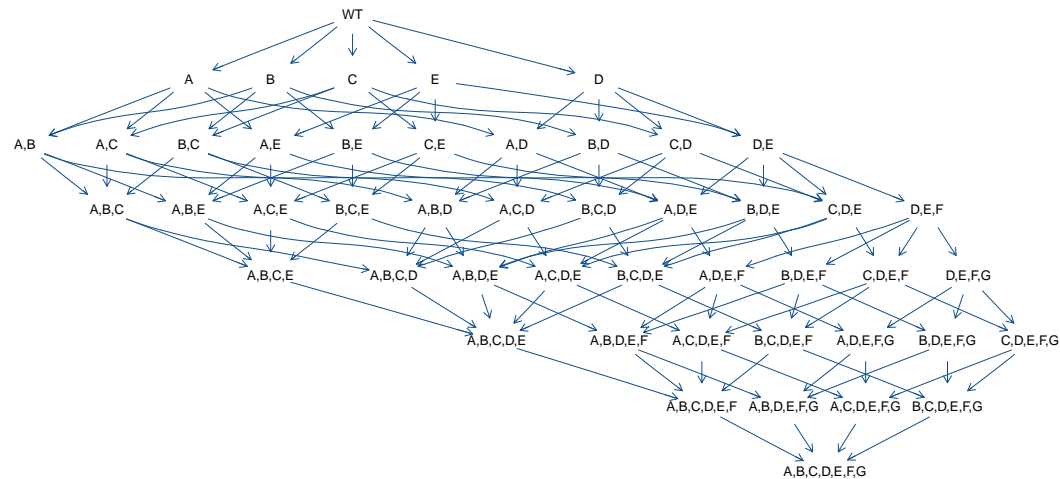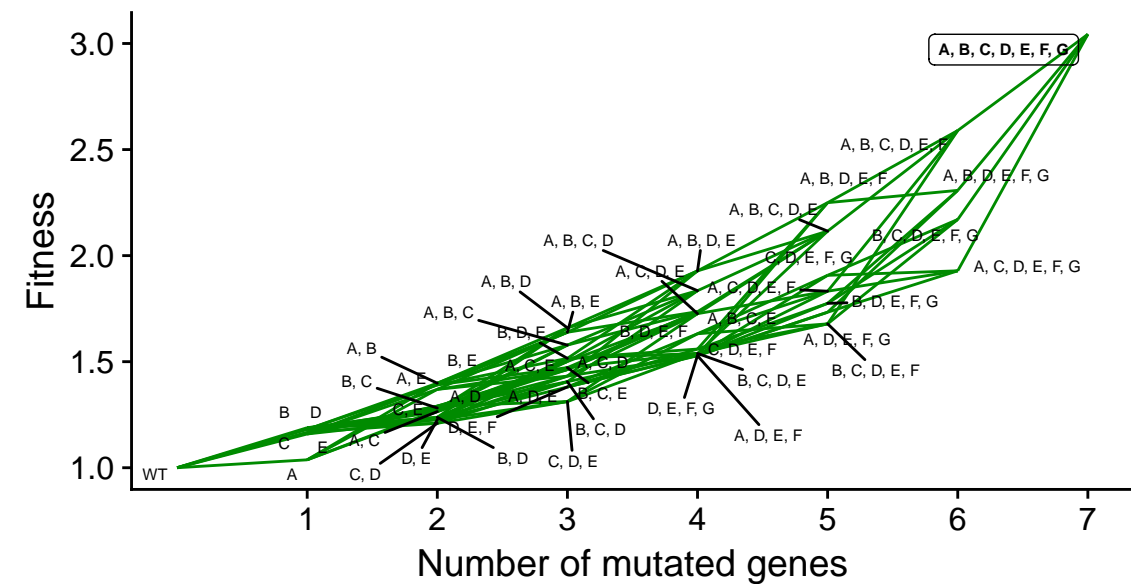

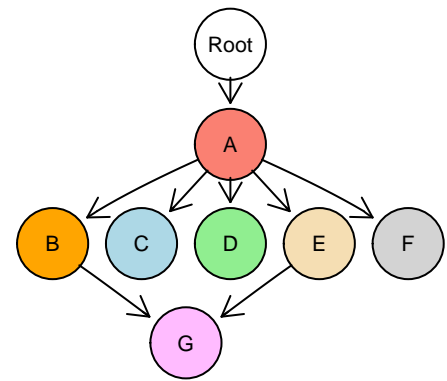

ID **JVEFSk5ORIOz9YE7**  
 acc genotypes **41**  
 peaks no back **1**  
 removed edges **0**  
 prop rem edges **0**

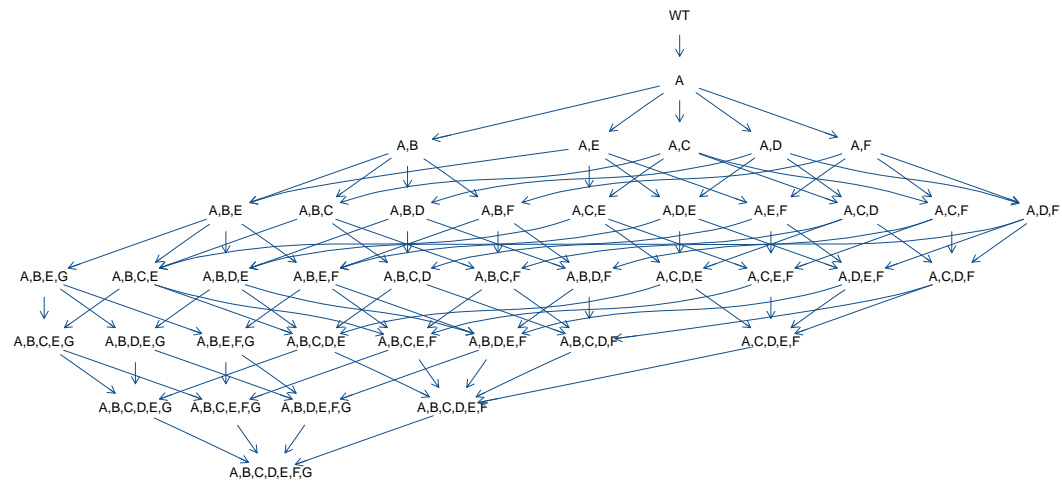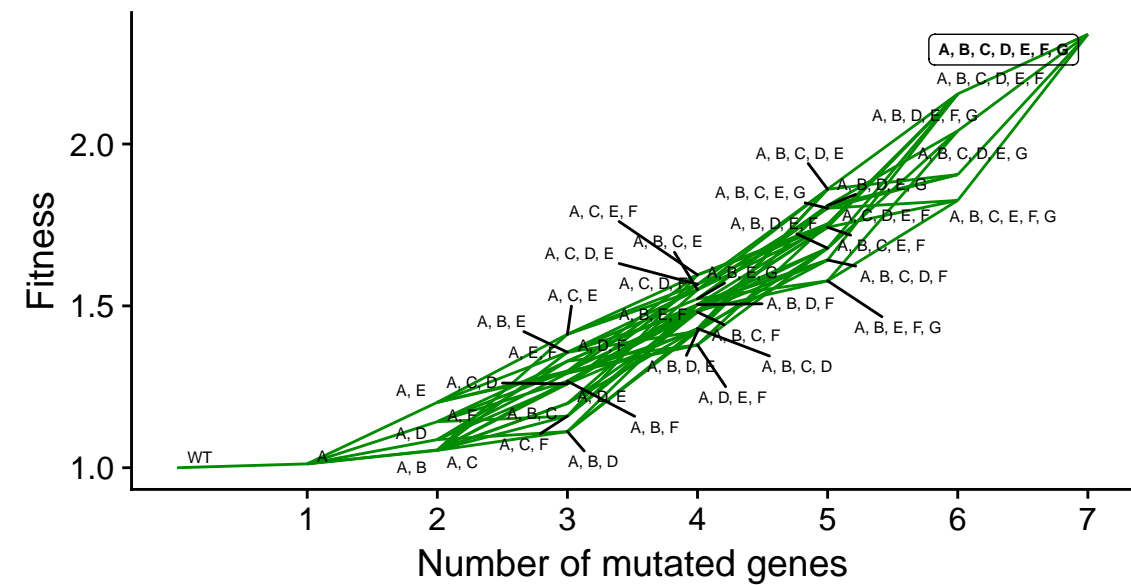

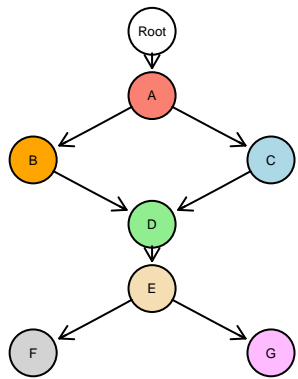

*ID* K9x9g2eq1VT8fICv  
*acc genotypes* 10  
*peaks no back* 1  
*removed edges* 0  
*prop rem edges* 0

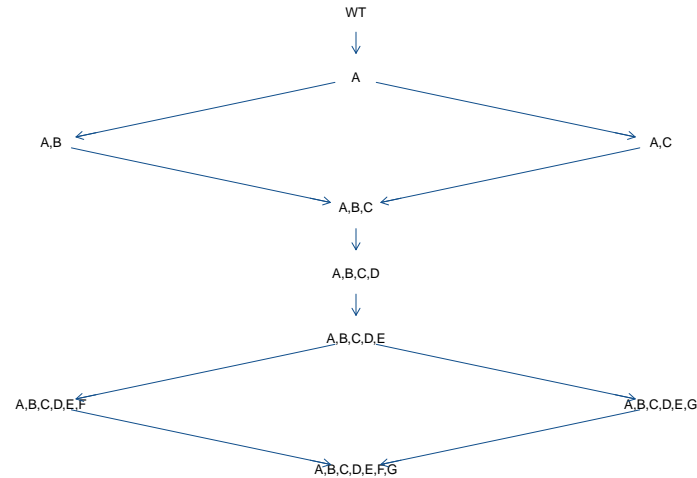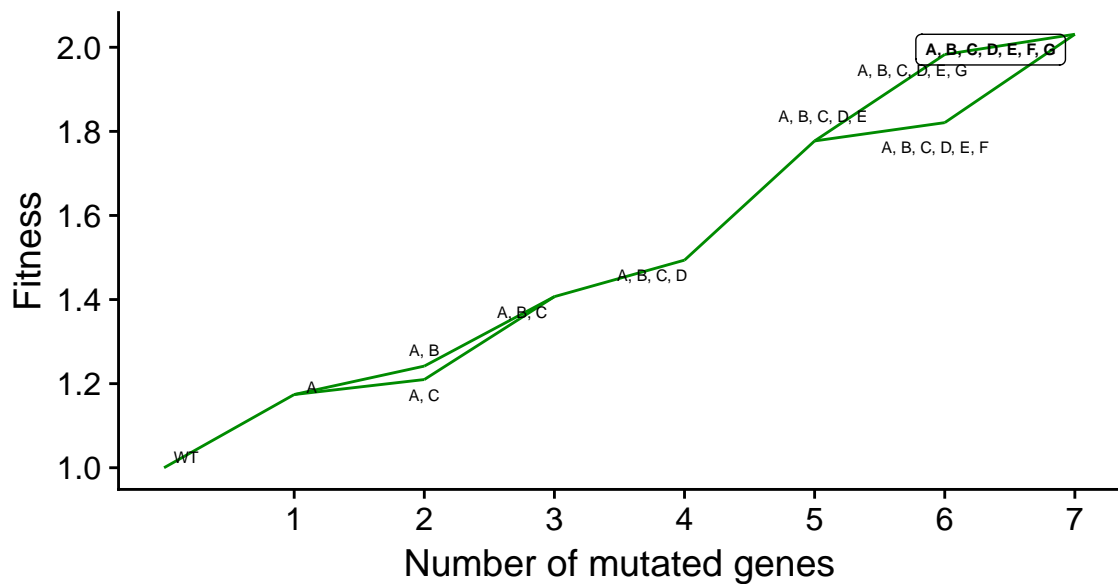

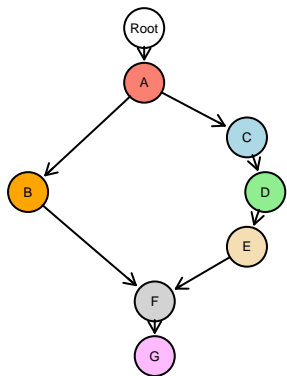

*ID* kBK5zr8juD8Etoo  
*acc genotypes* 11  
*peaks no back* 1  
*removed edges* 0  
*prop rem edges* 0

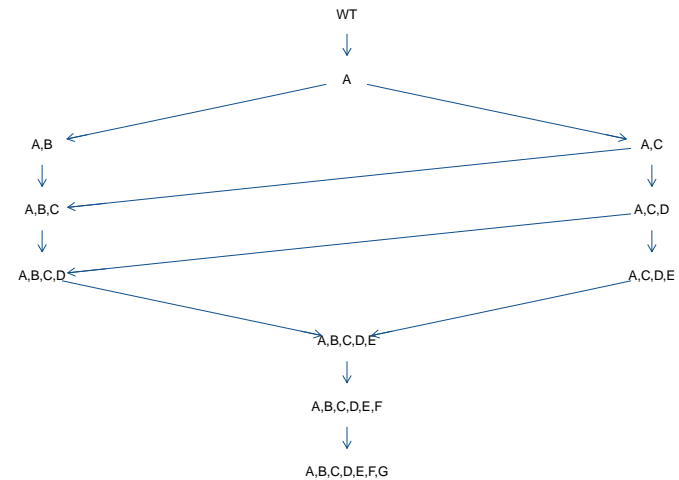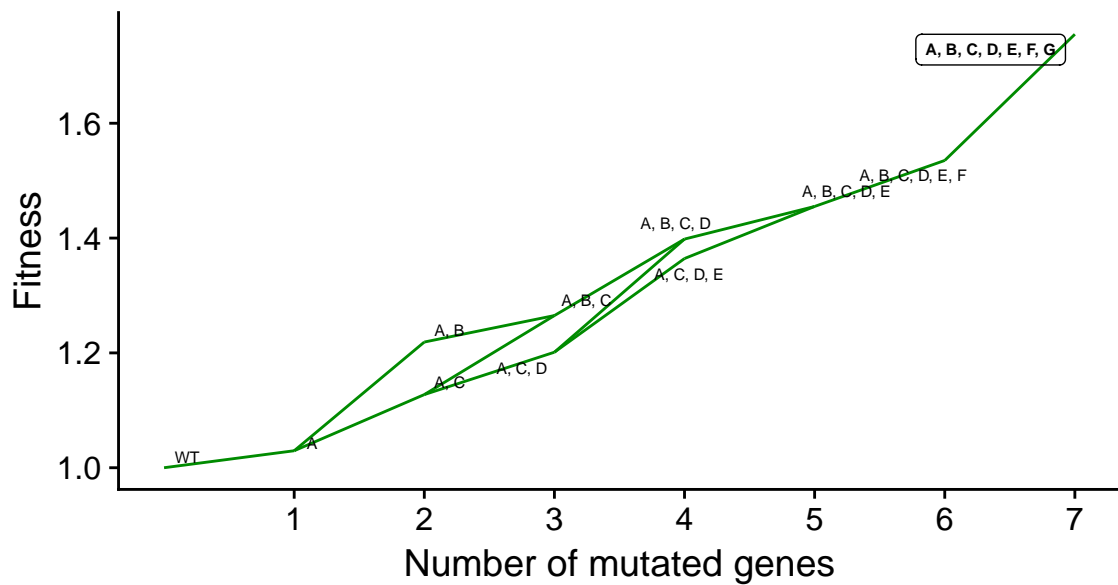

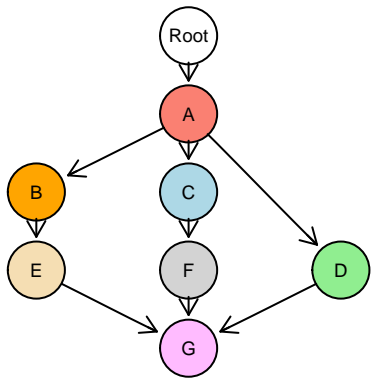

*ID* KctNTtEFQr1oMvyT  
*acc genotypes* 20  
*peaks no back* 1  
*removed edges* 0  
*prop rem edges* 0

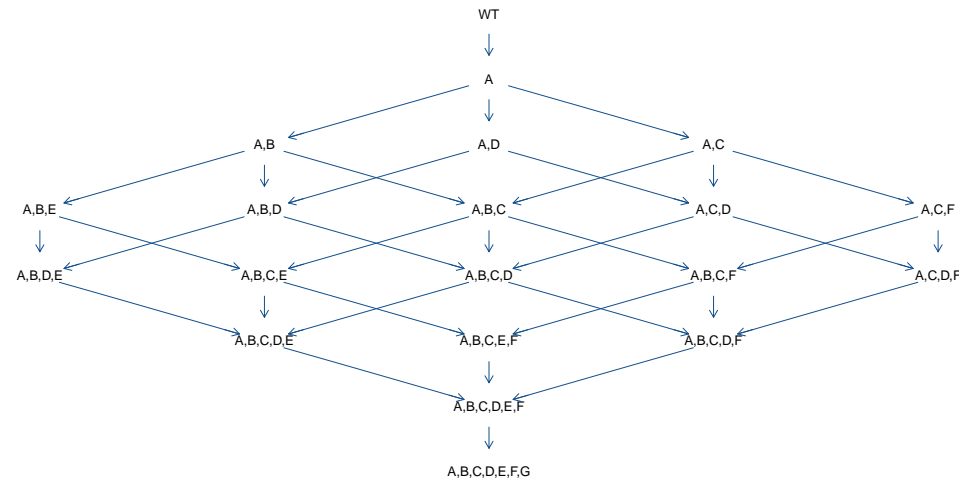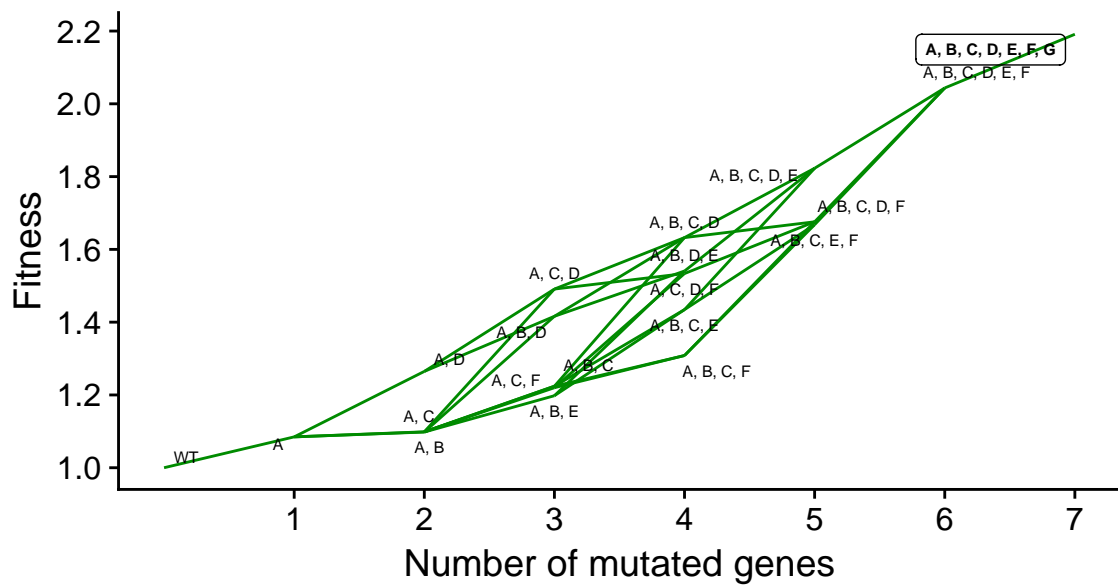

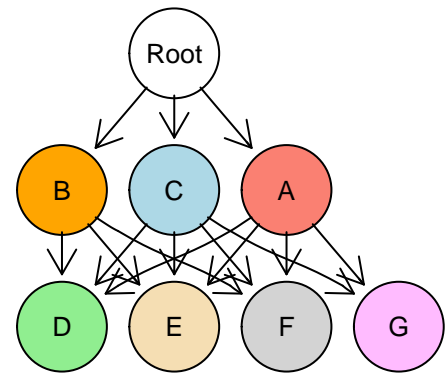

*ID* kf9mgLp5ZKwjcVhz  
*acc genotypes* 24  
*peaks no back* 1  
*removed edges* 0  
*prop rem edges* 0

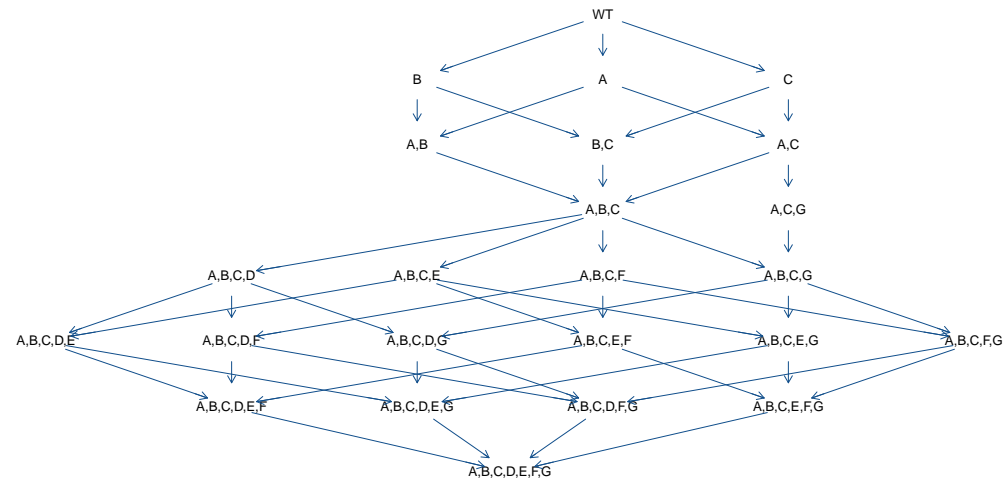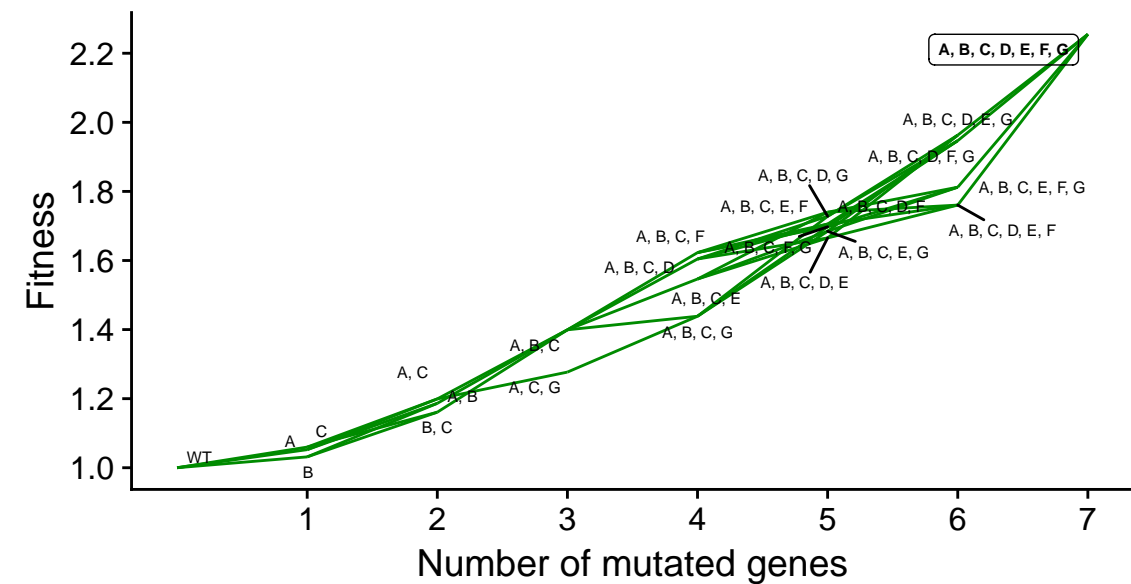

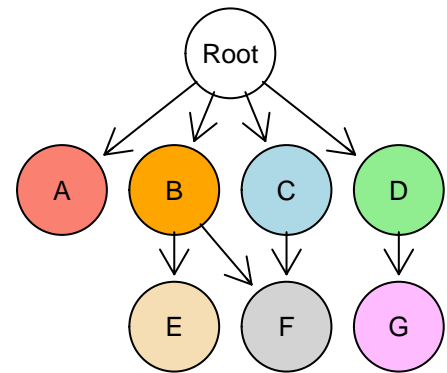

ID **KtmVfIOzxH44NUr**  
 acc genotypes **48**  
 peaks no back **1**  
 removed edges **0**  
 prop rem edges **0**

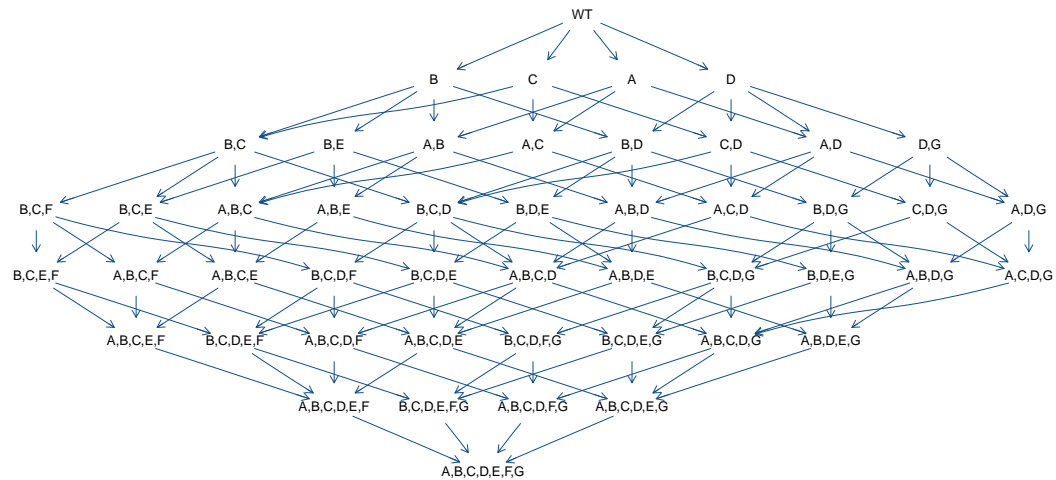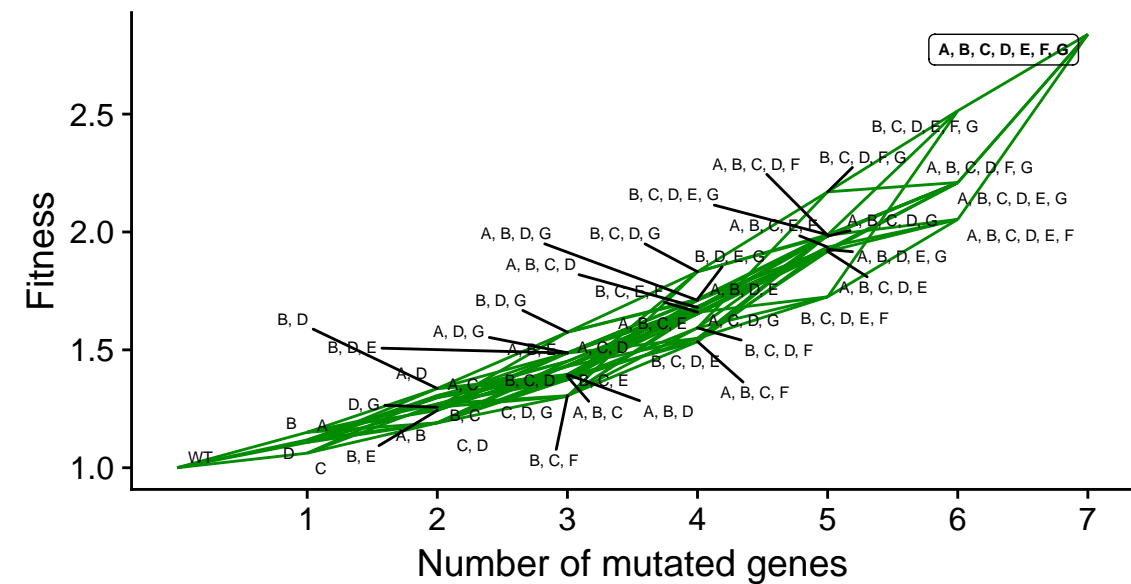

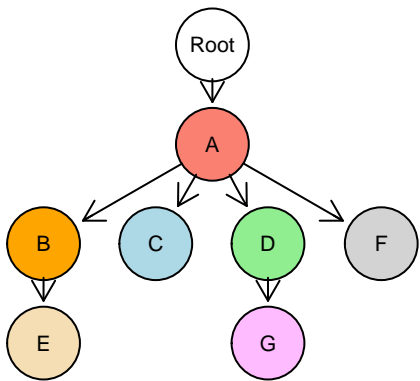

ID **KZkcV1r2fzi9JPSr**  
 acc genotypes **37**  
 peaks no back **1**  
 removed edges **0**  
 prop rem edges **0**

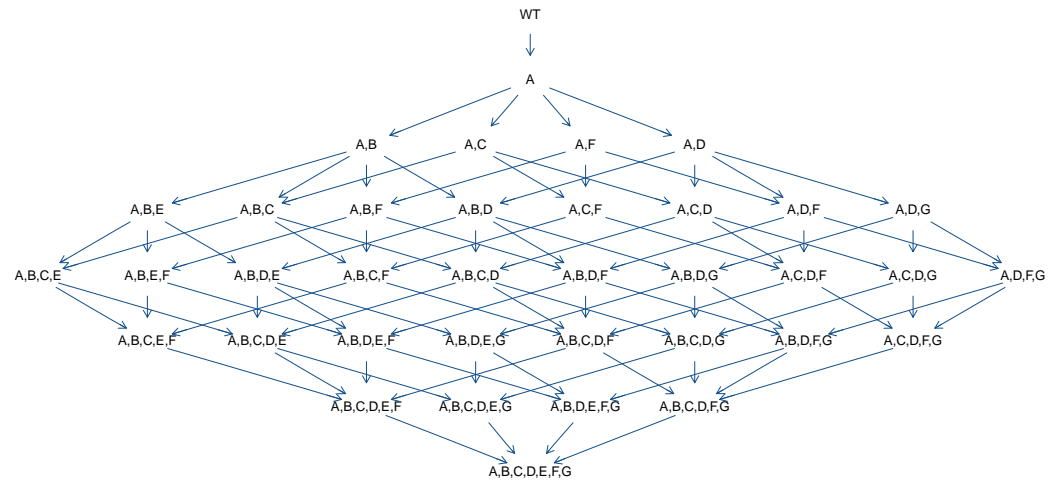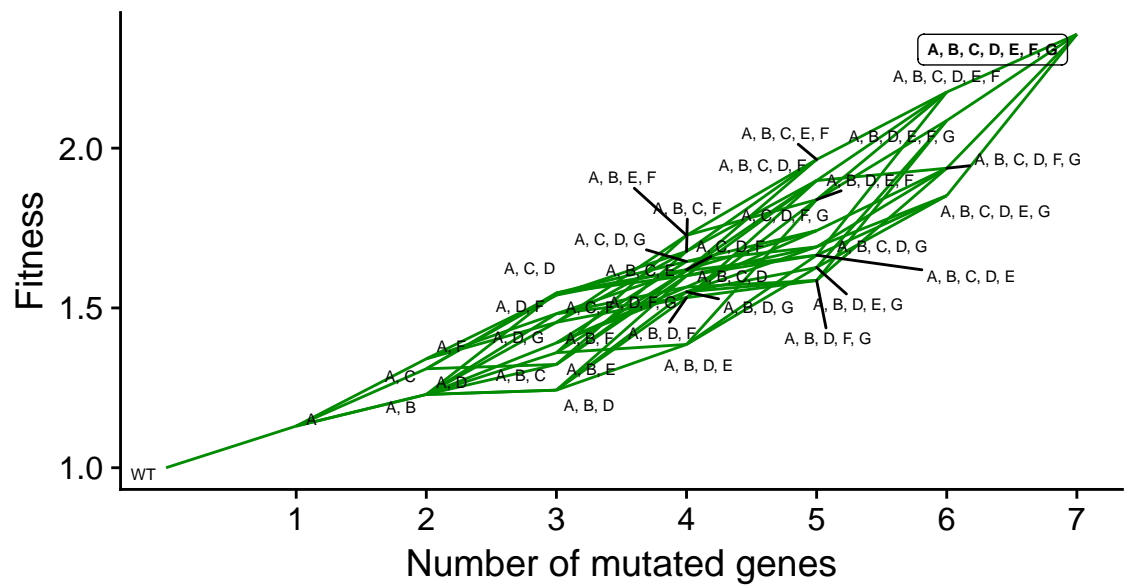



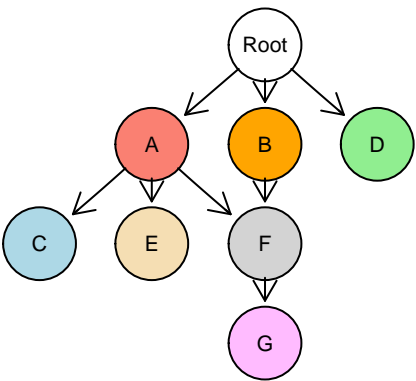

*ID* Lke10loDf84oef4BC  
*acc genotypes* 36  
*peaks no back* 1  
*removed edges* 0  
*prop rem edges* 0

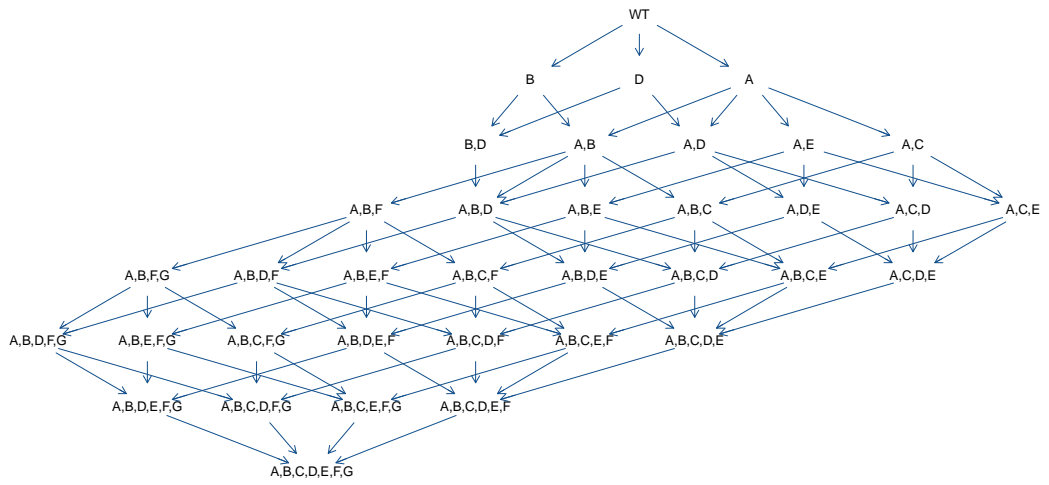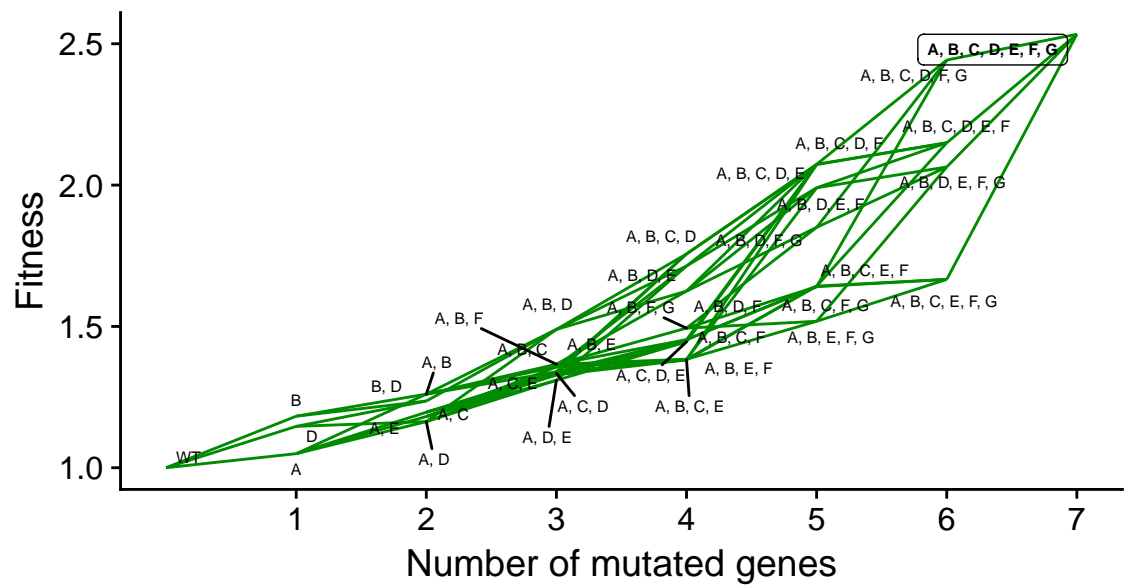

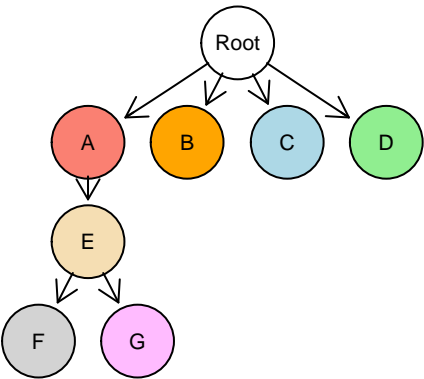

ID **LIVHZ106EHMqYUsuF**  
 acc genotypes **48**  
 peaks no back 1  
 removed edges 0  
 prop rem edges 0

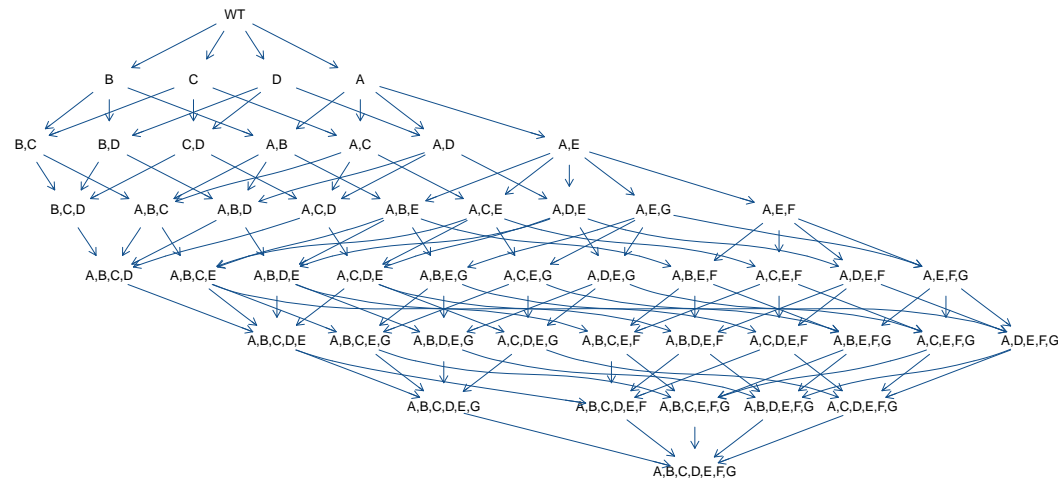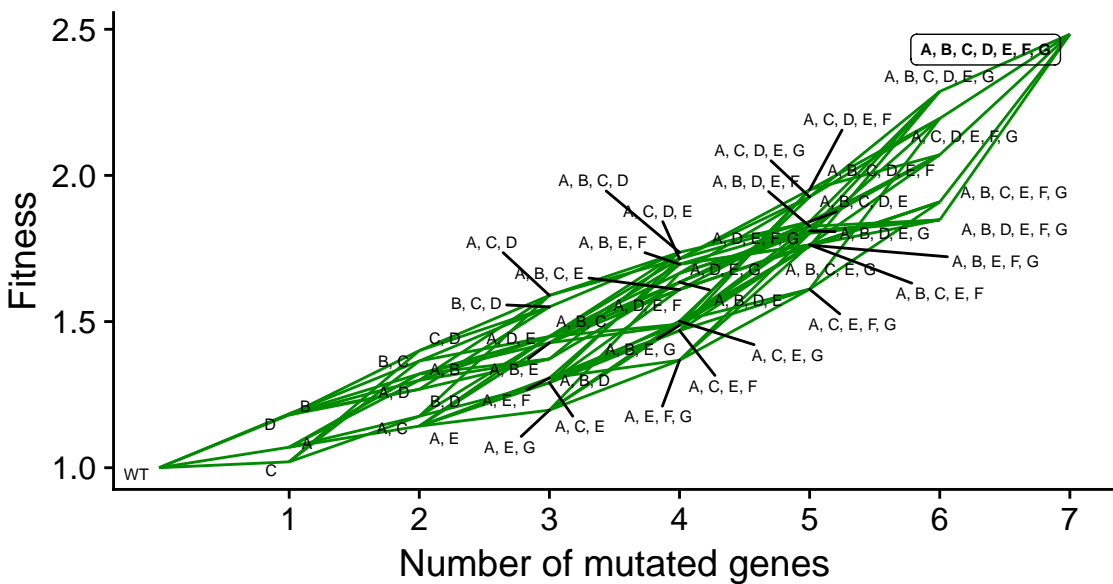

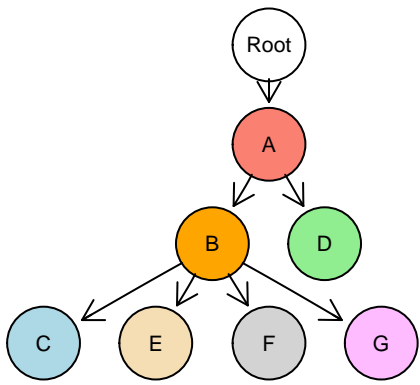

ID LpANxOHMhj1cYLtN  
 acc genotypes 35  
 peaks no back 1  
 removed edges 0  
 prop rem edges 0

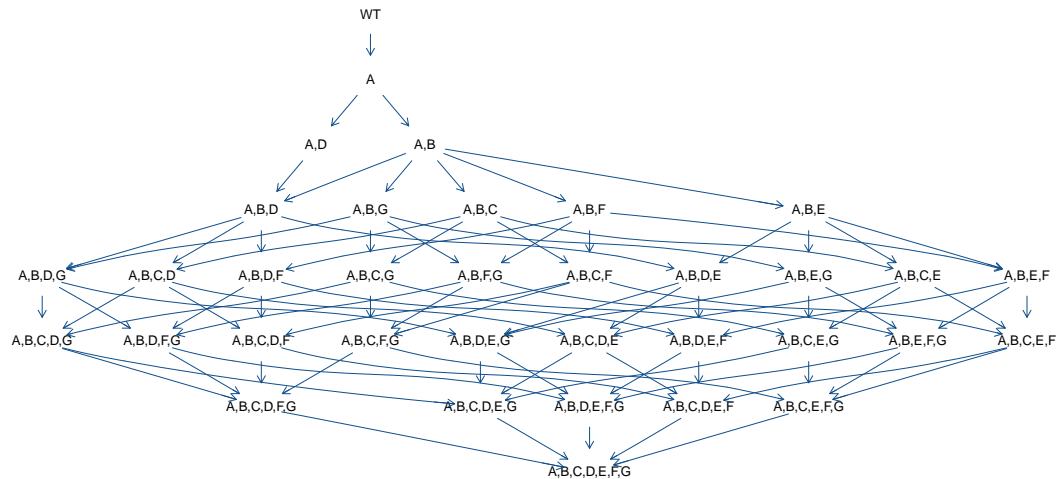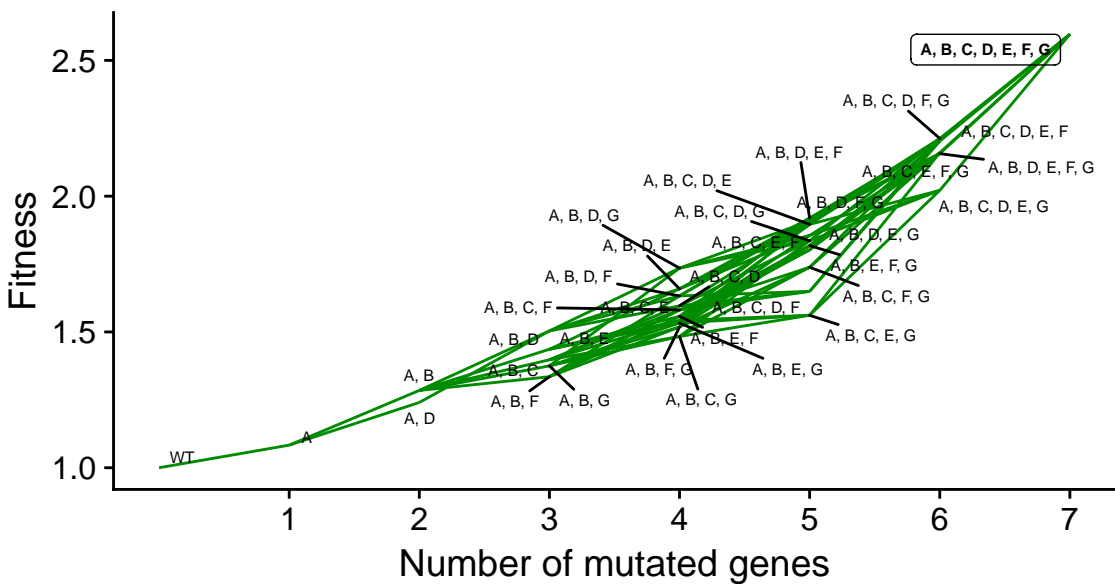

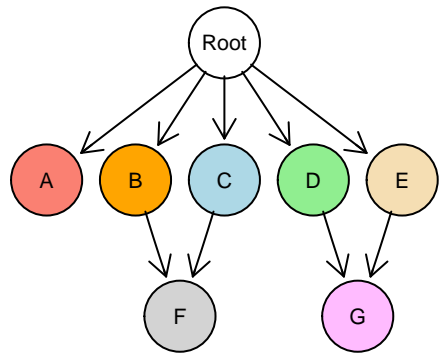

*ID* LTgRqknZ6BY1cfLB  
*acc genotypes* 50  
*peaks no back* 1  
*removed edges* 0  
*prop rem edges* 0

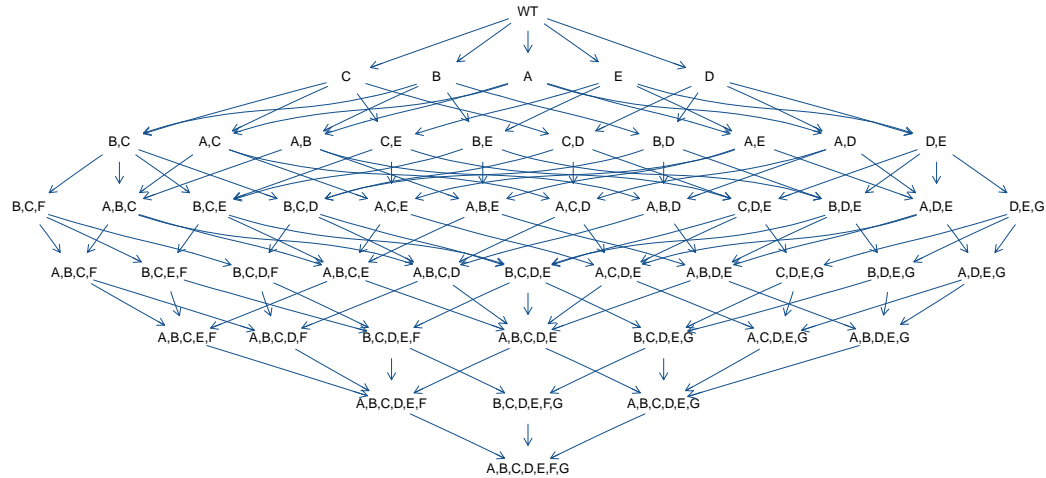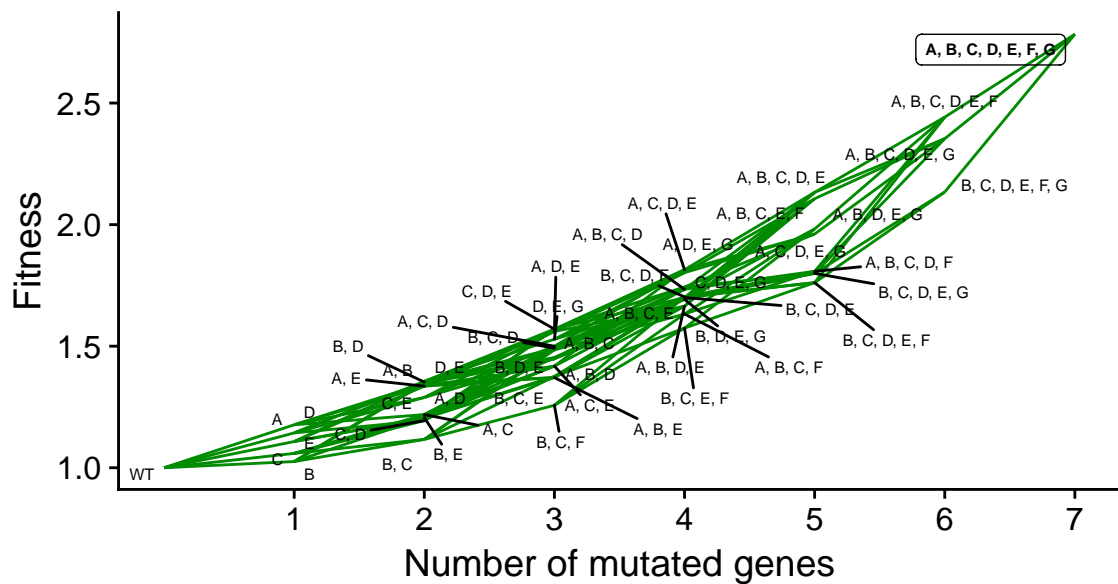

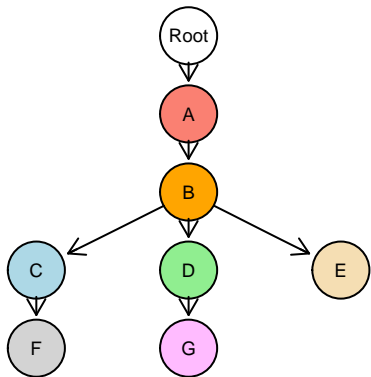

ID Mdi5kYcCCepKSprh  
 acc genotypes 20  
 peaks no back 1  
 removed edges 0  
 prop rem edges 0

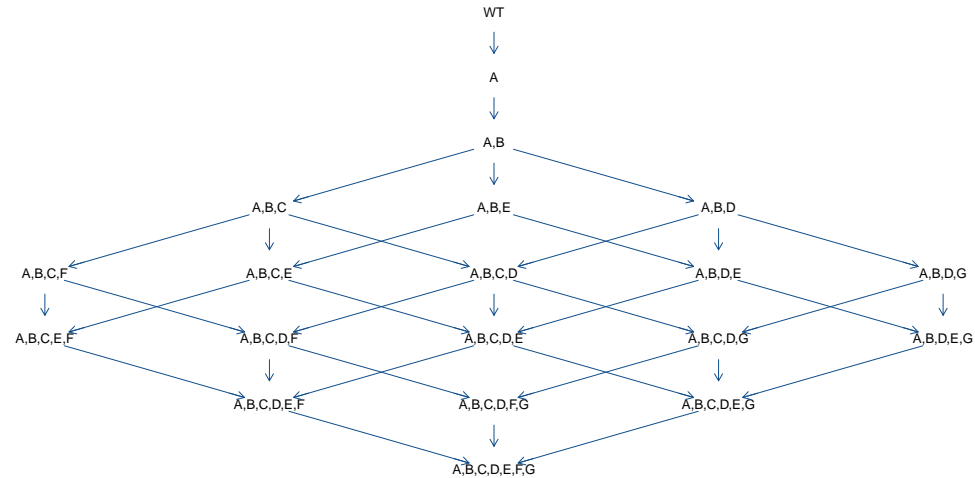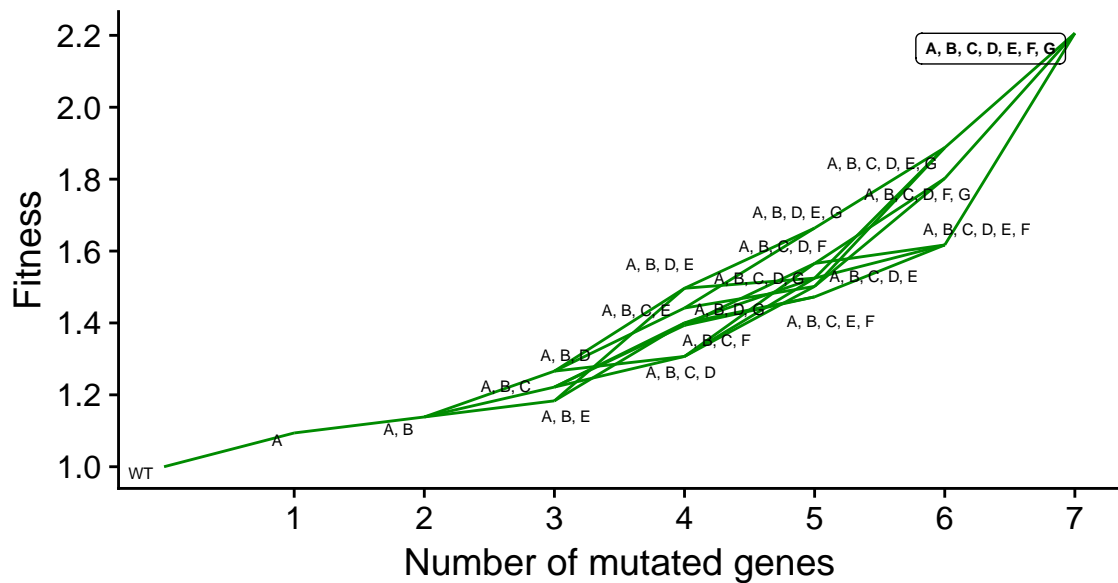

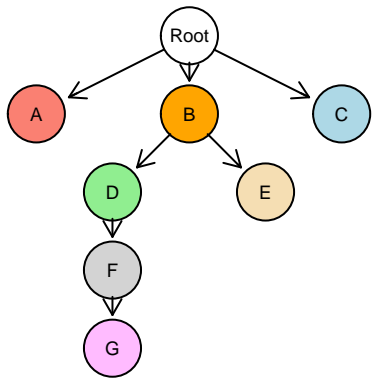

*ID* mEX5RjVtCmtkvI6C  
*acc genotypes* 36  
*peaks no back* 1  
*removed edges* 0  
*prop rem edges* 0

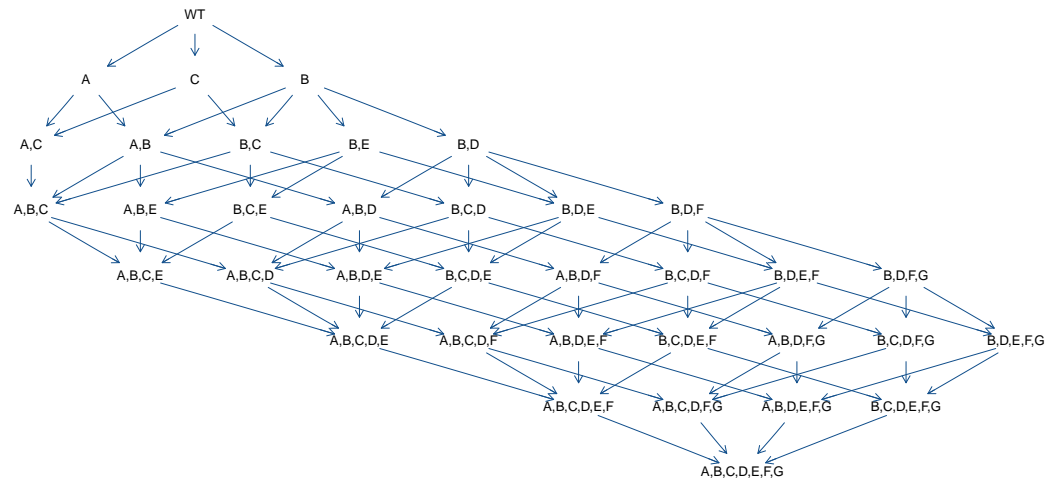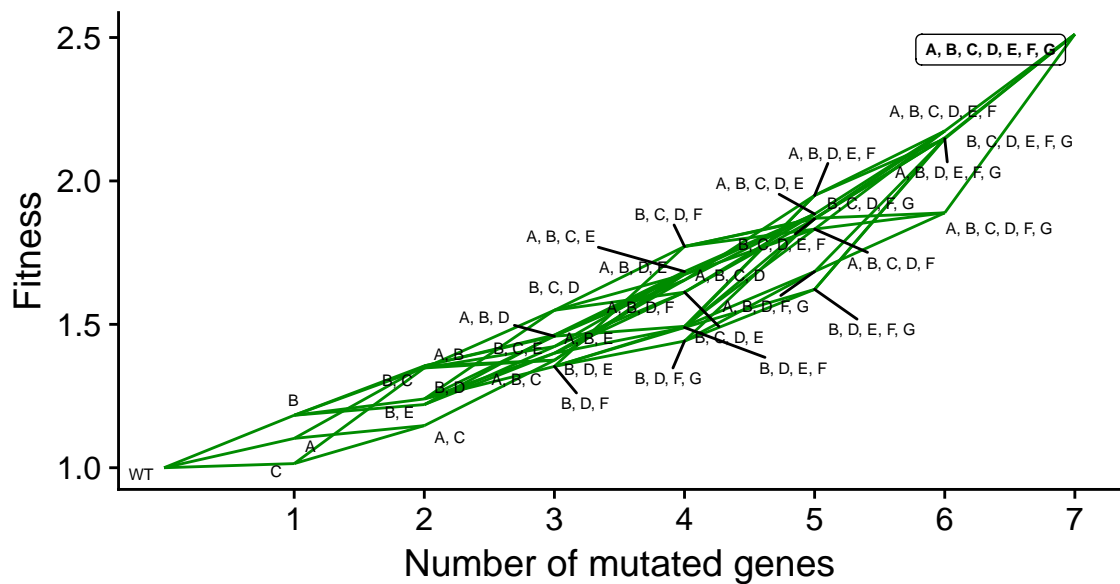

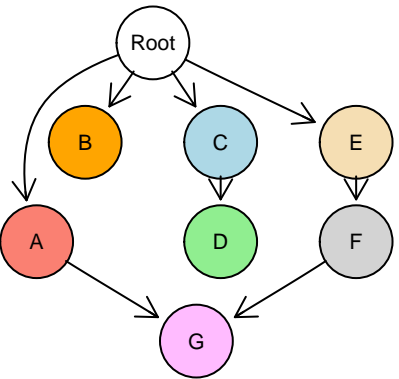

ID **MHHdzPsMBi26wD8j**  
 acc genotypes **42**  
 peaks no back **1**  
 removed edges **0**  
 prop rem edges **0**

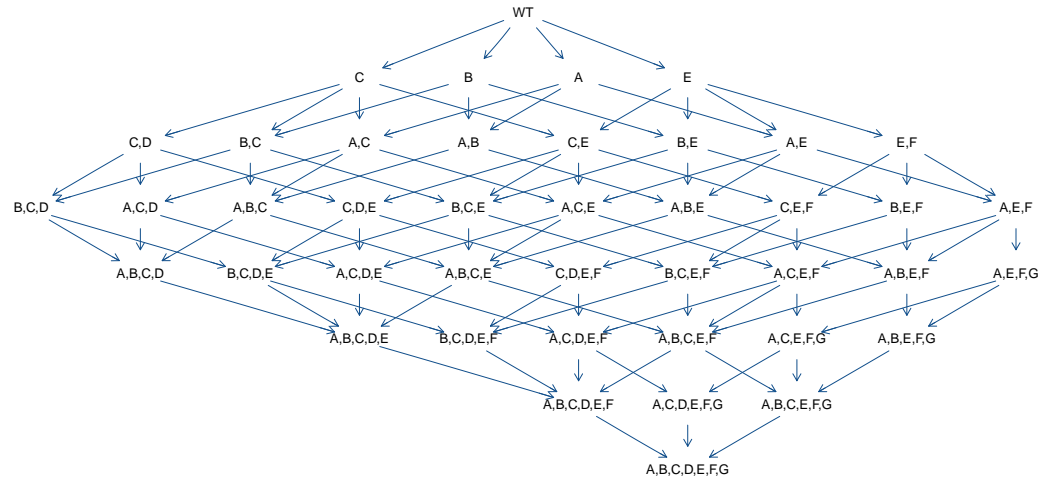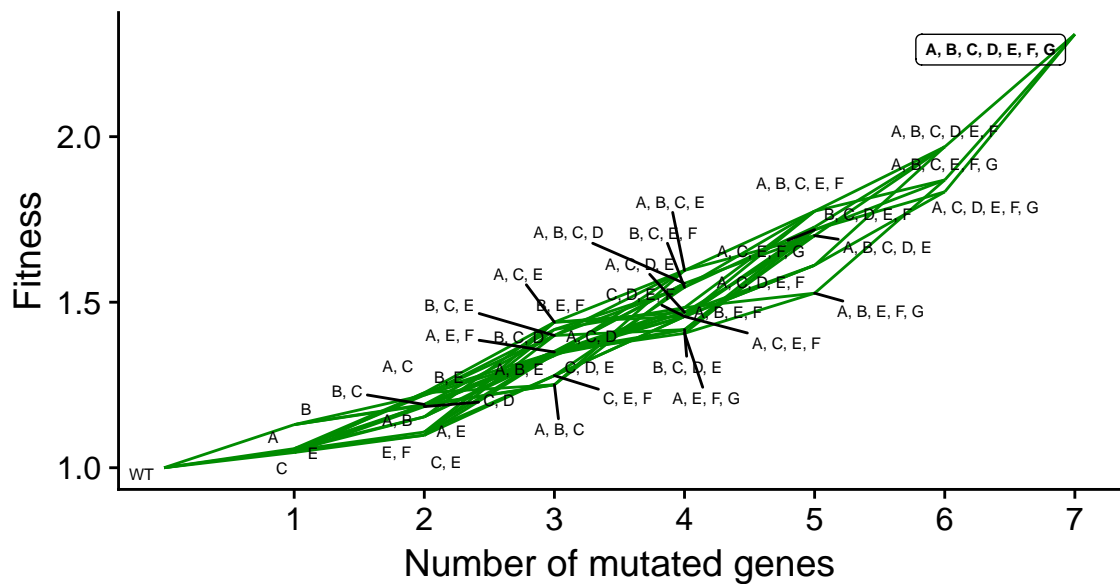

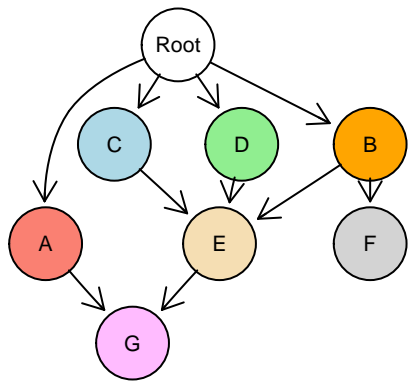

*ID* MiiXBqQH10YjcXVMI  
*acc genotypes* 30  
*peaks no back* 1  
*removed edges* 0  
*prop rem edges* 0

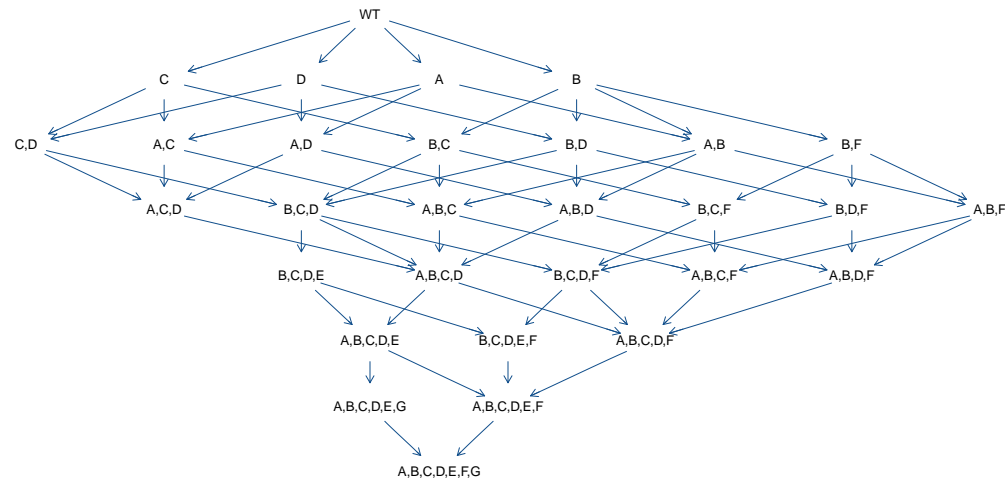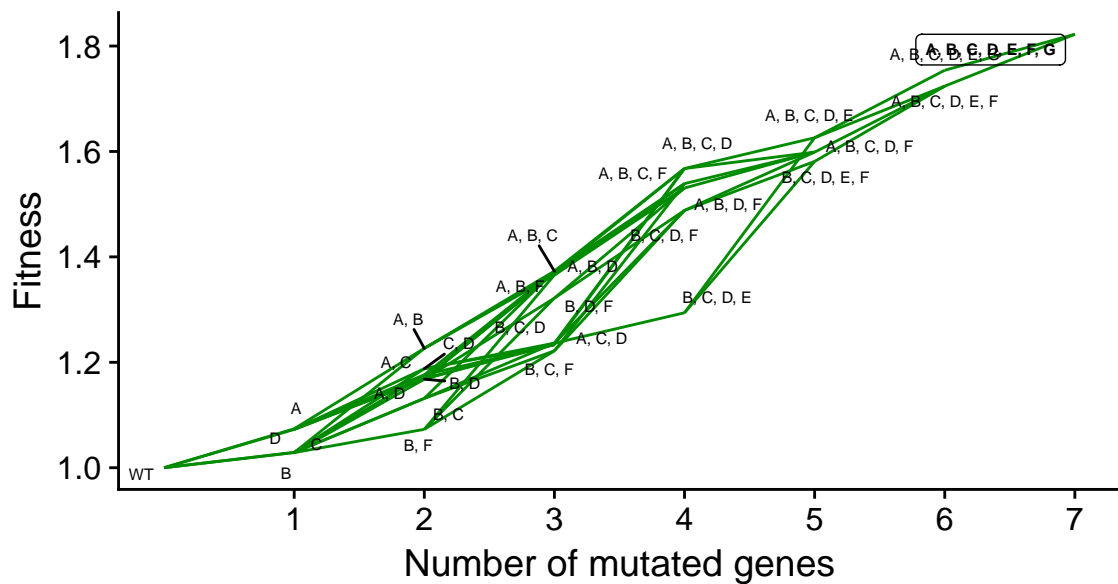



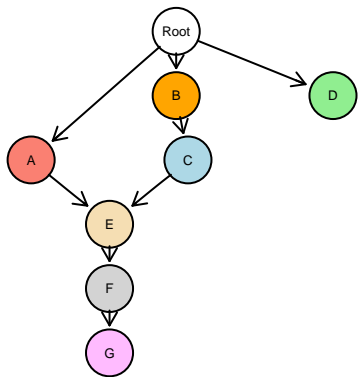

ID MJEstF1cdVazEIfA  
 acc genotypes 18  
 peaks no back 1  
 removed edges 0  
 prop rem edges 0

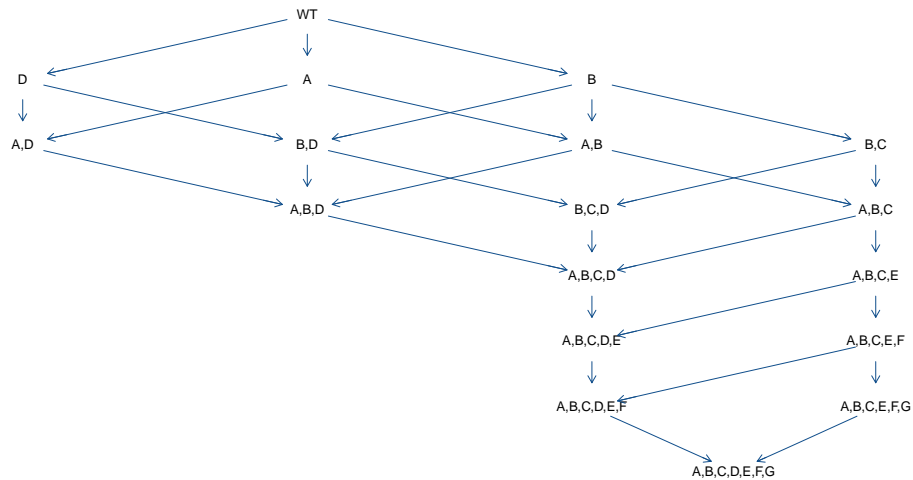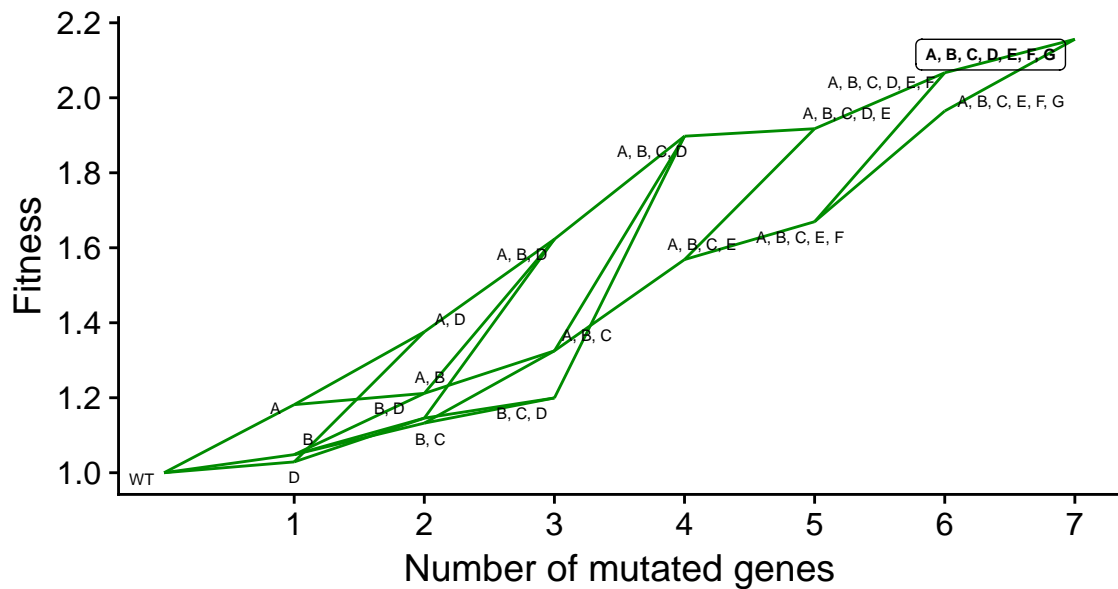

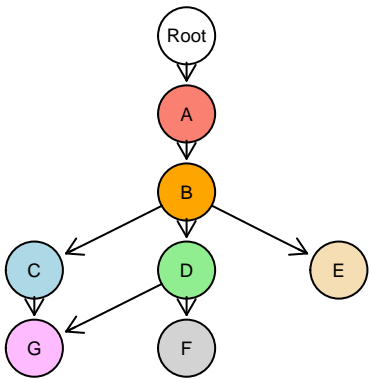

*ID* MJMydL6WRmXU5Lio  
*acc genotypes* 18  
*peaks no back* 1  
*removed edges* 0  
*prop rem edges* 0

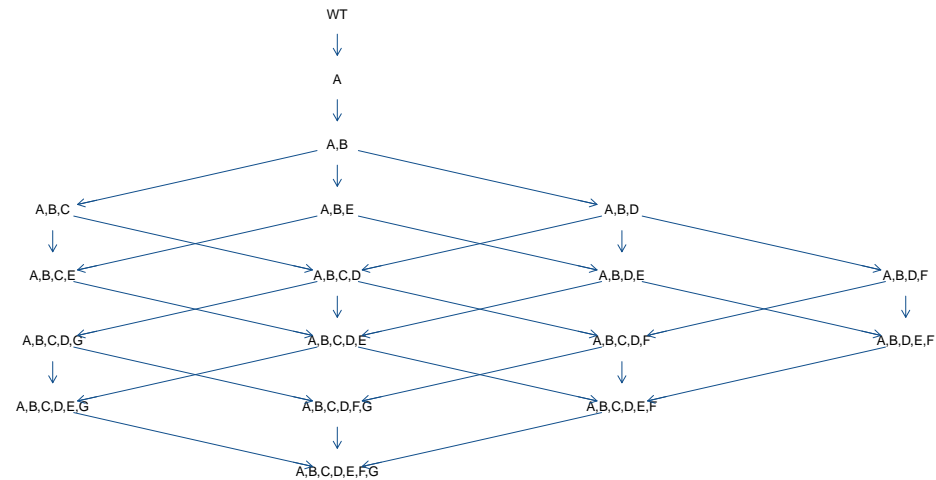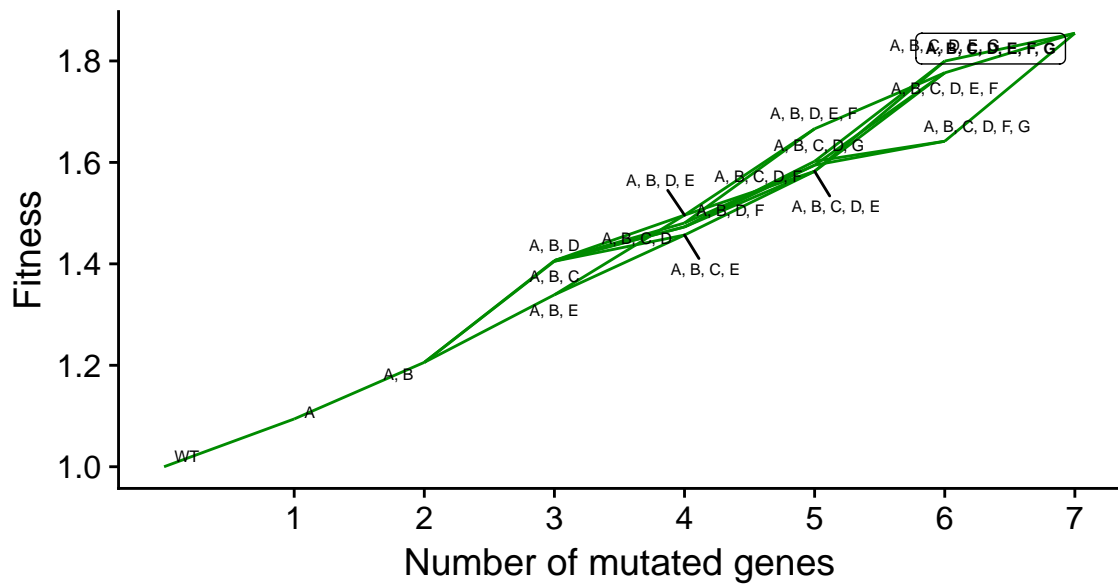

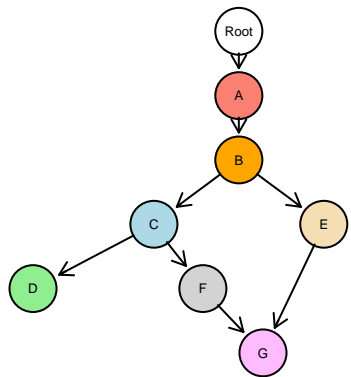

ID **mJyMPts2CCp9bFCw**  
 acc genotypes **14**  
 peaks no back **1**  
 removed edges **0**  
 prop rem edges **0**

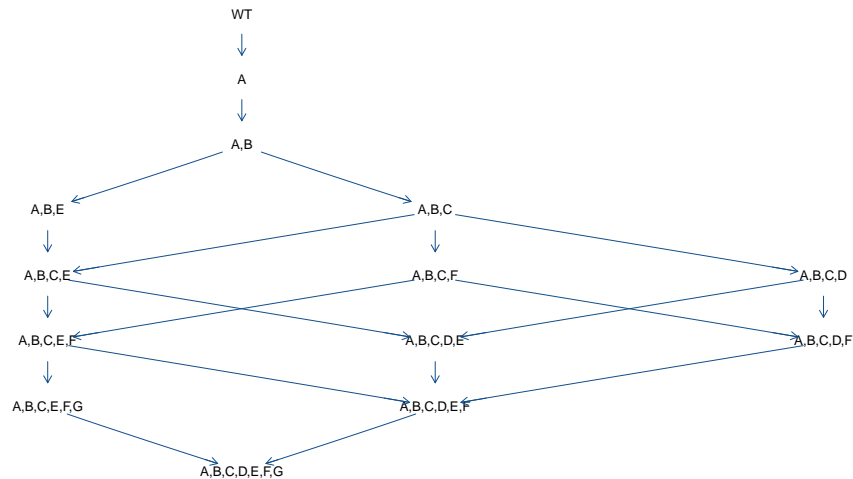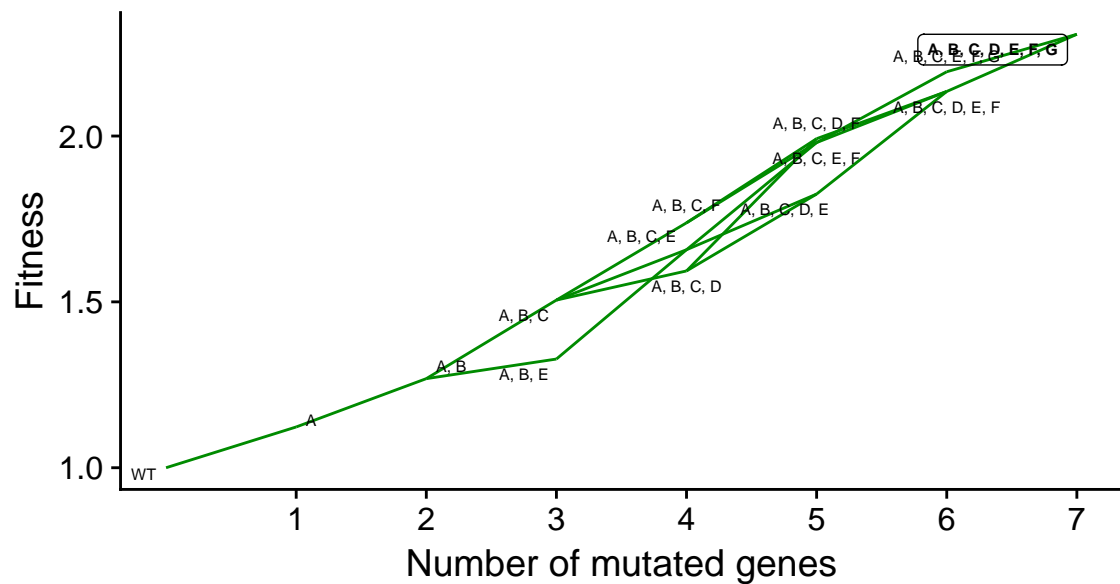

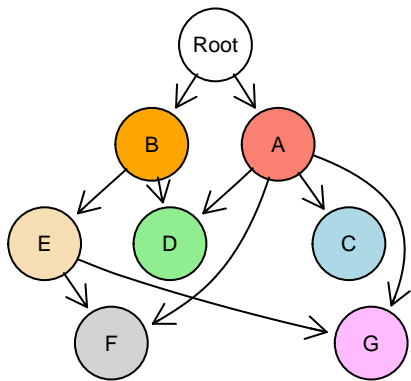

ID MmQTibreqvylDuMK  
 acc genotypes 25  
 peaks no back 1  
 removed edges 0  
 prop rem edges 0

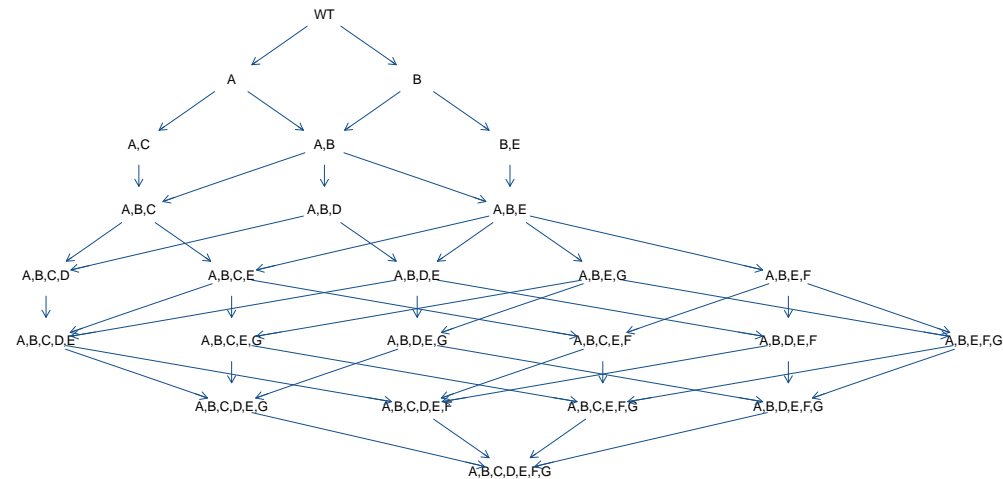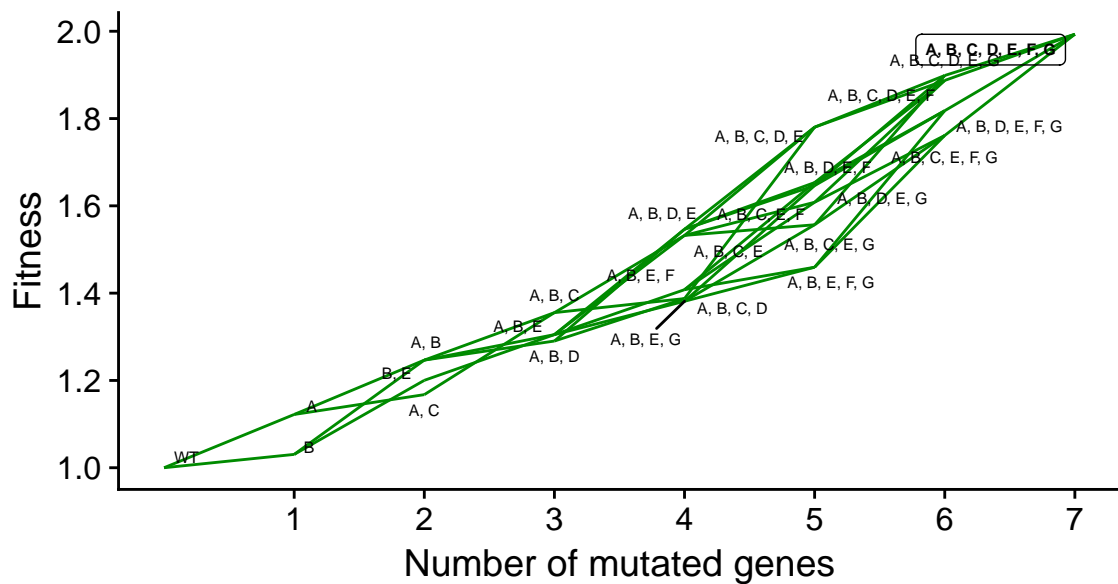

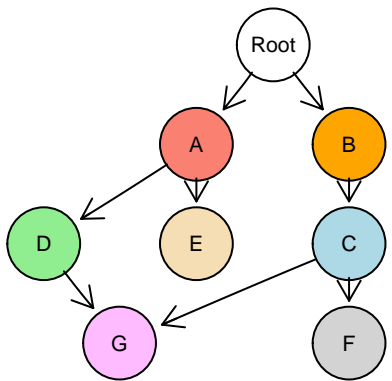

*ID* msMlql4eo3nmvydj  
*acc genotypes* 24  
*peaks no back* 1  
*removed edges* 0  
*prop rem edges* 0

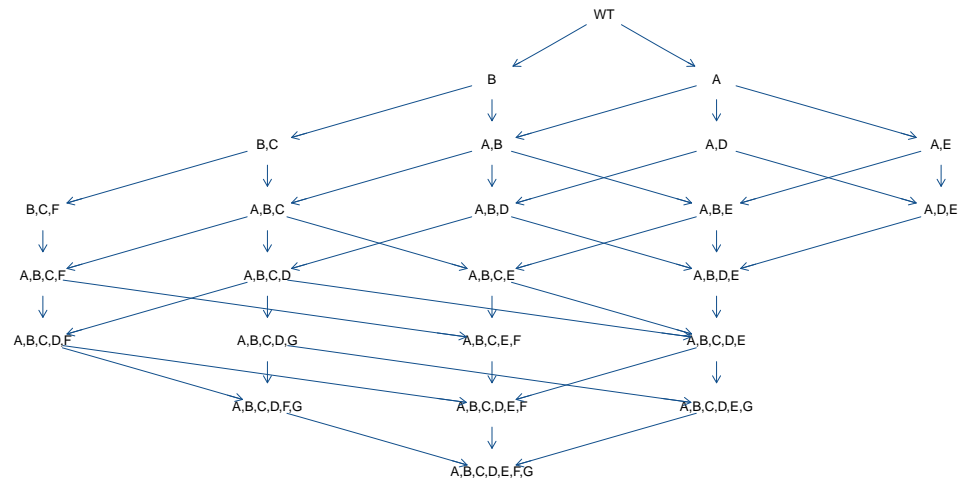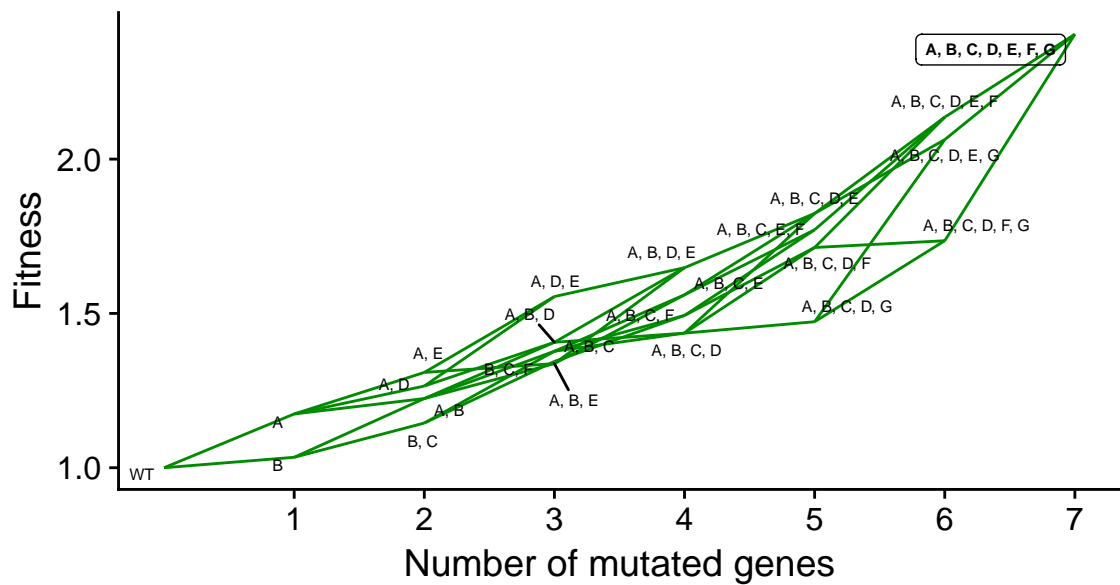

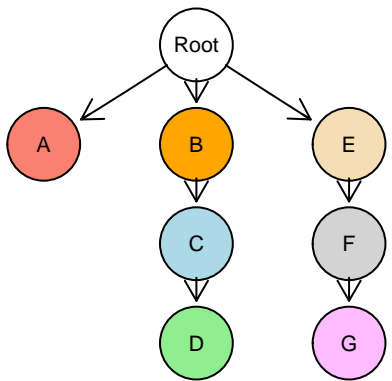

*ID* **mzgsSEJju3Unz2A**  
*acc genotypes* **32**  
*peaks no back* **1**  
*removed edges* **0**  
*prop rem edges* **0**

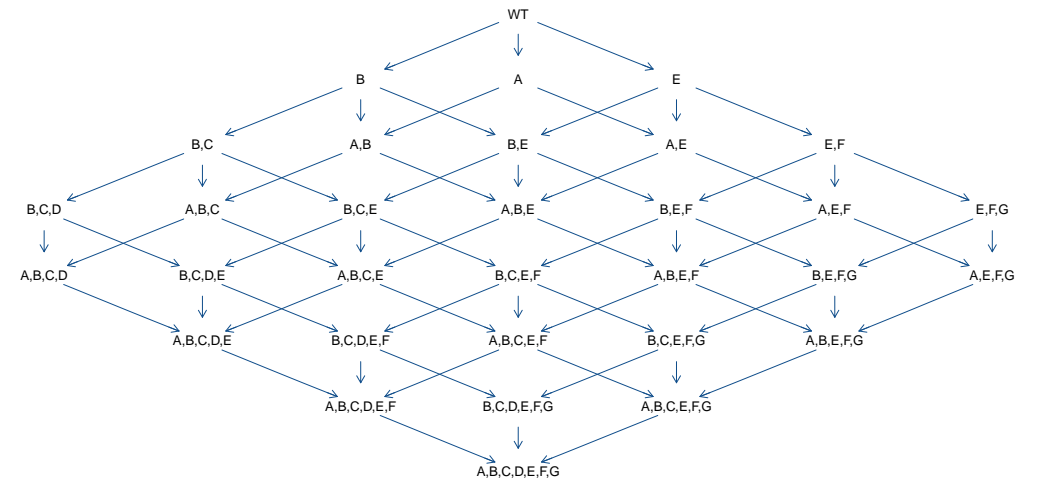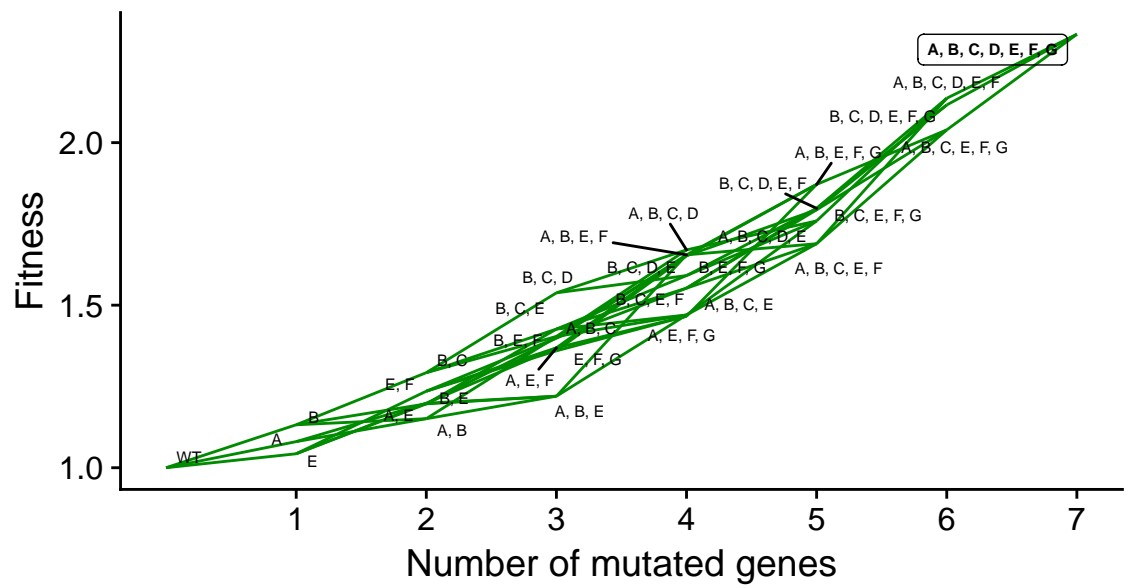

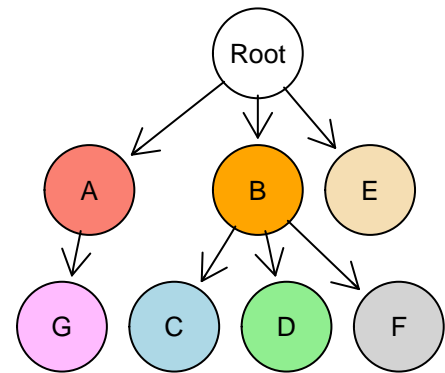

ID N4iitsjj5WGvCNiO  
 acc genotypes 54  
 peaks no back 1  
 removed edges 0  
 prop rem edges 0

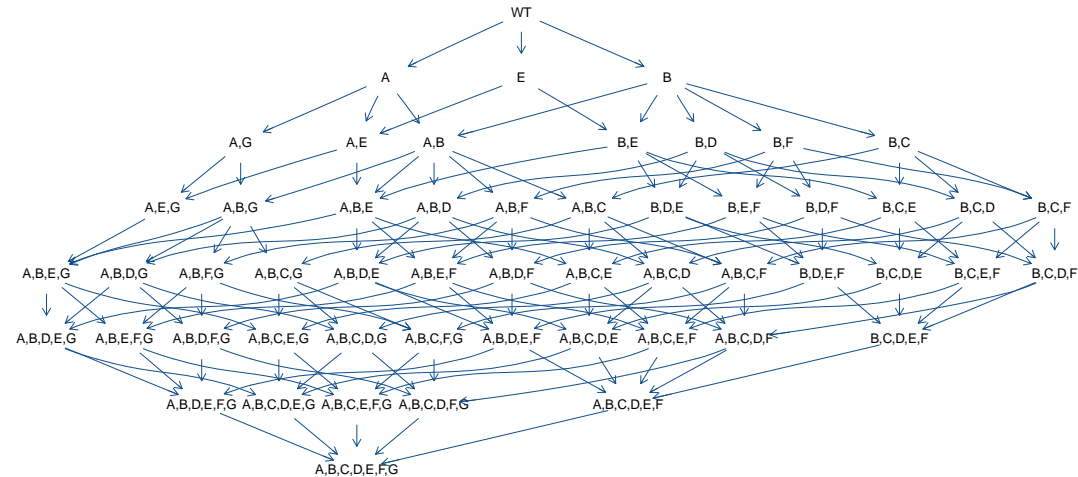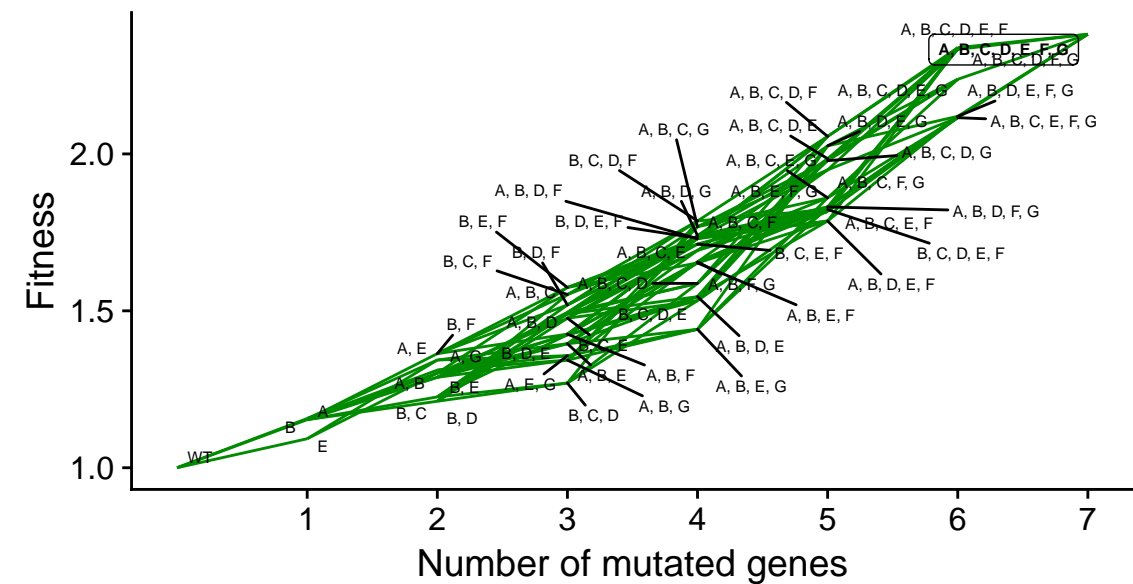

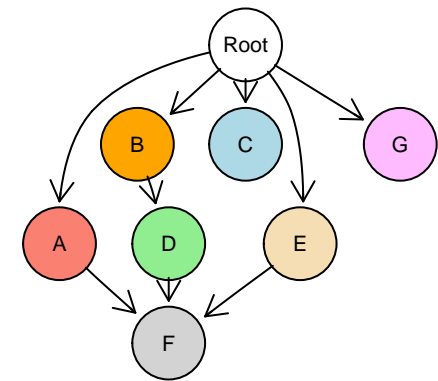

ID N9wjEenhGOIchUML  
 acc genotypes 52  
 peaks no back 1  
 removed edges 0  
 prop rem edges 0

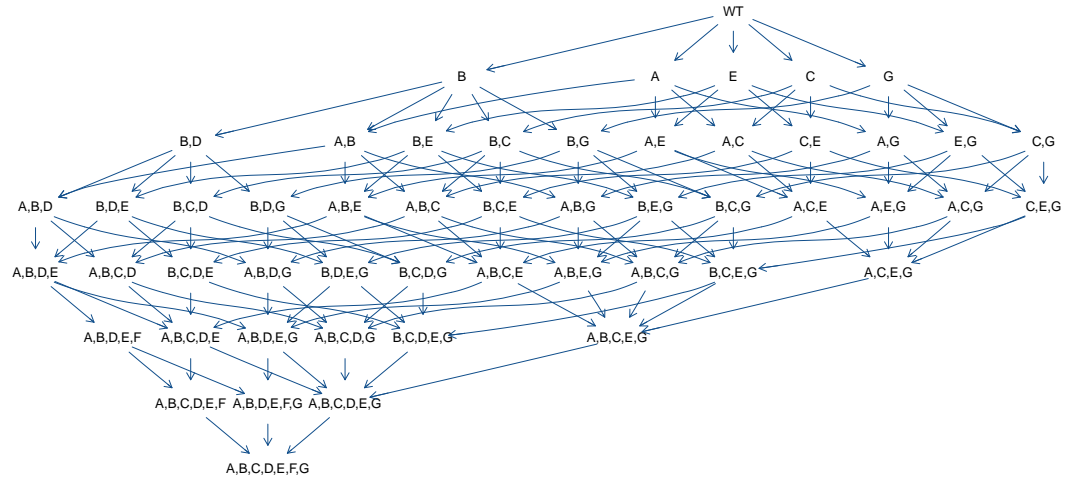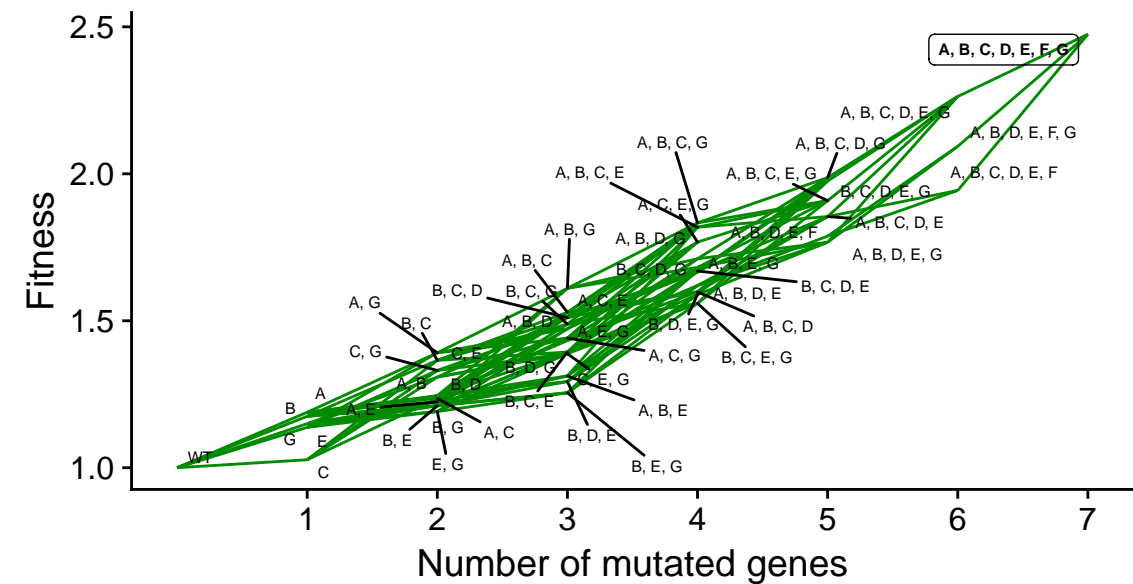



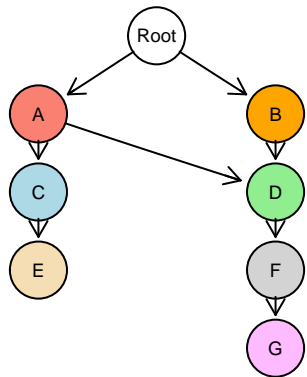

*ID* nbY47YBy9tCkfebb  
*acc genotypes* 17  
*peaks no back* 1  
*removed edges* 0  
*prop rem edges* 0

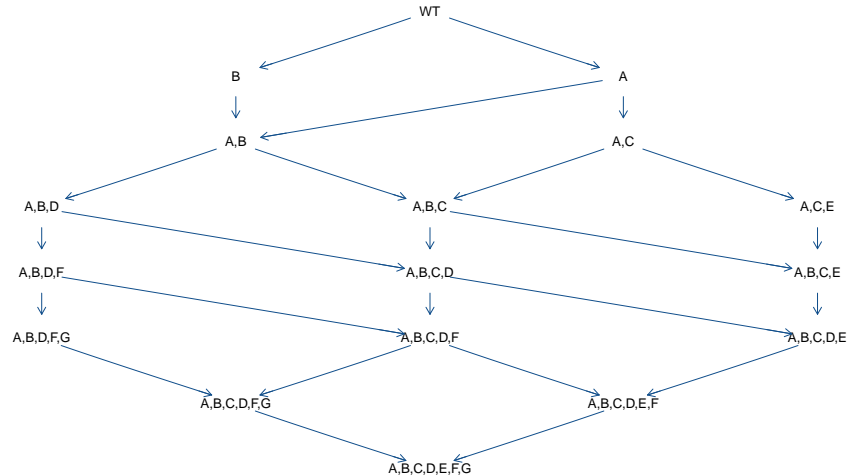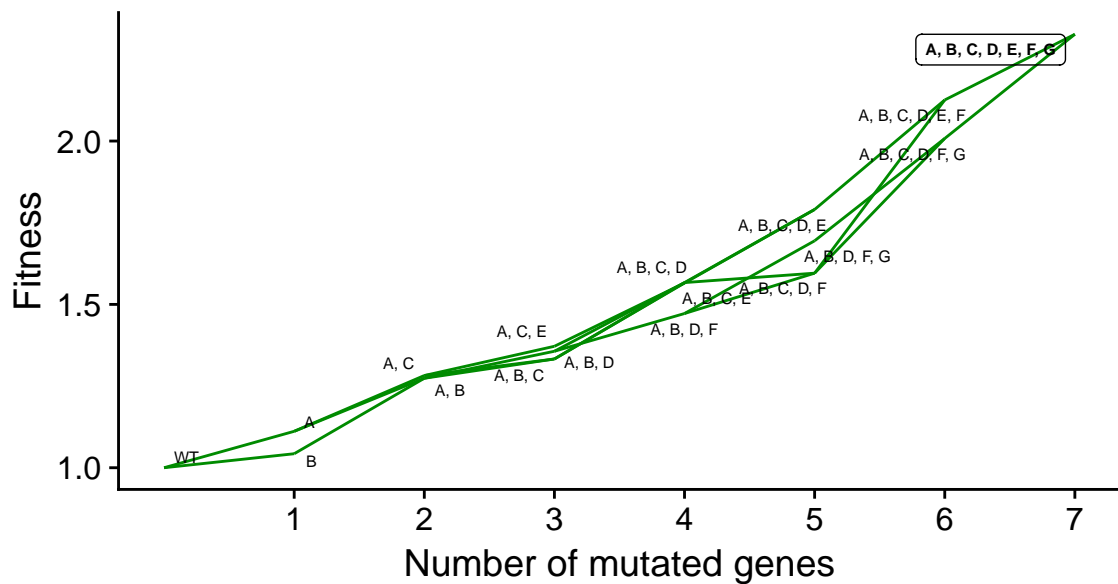

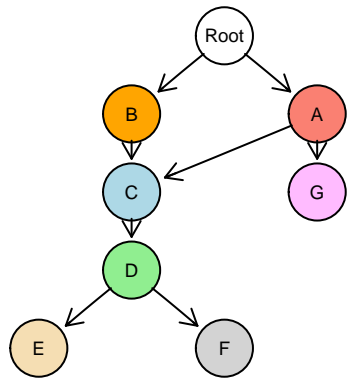

*ID*      **NEtTcxoCuFV4dbsx**  
*acc genotypes*    **16**  
*peaks no back*     **1**  
*removed edges*    **0**  
*prop rem edges*    **0**

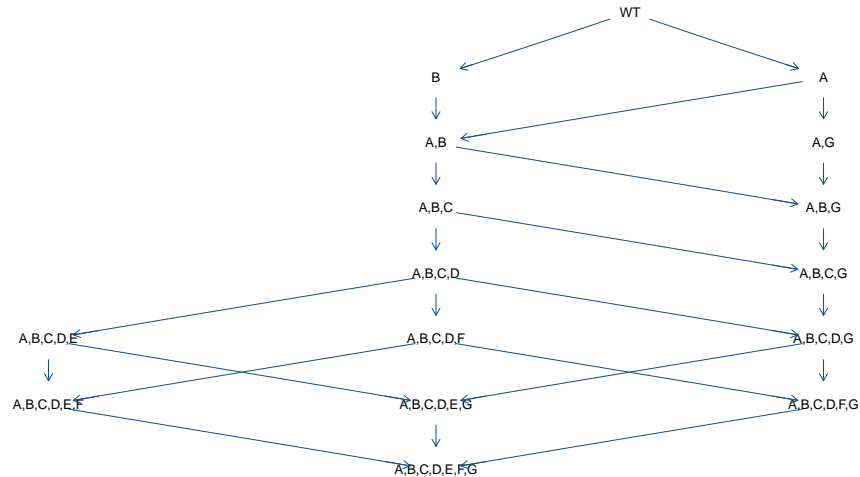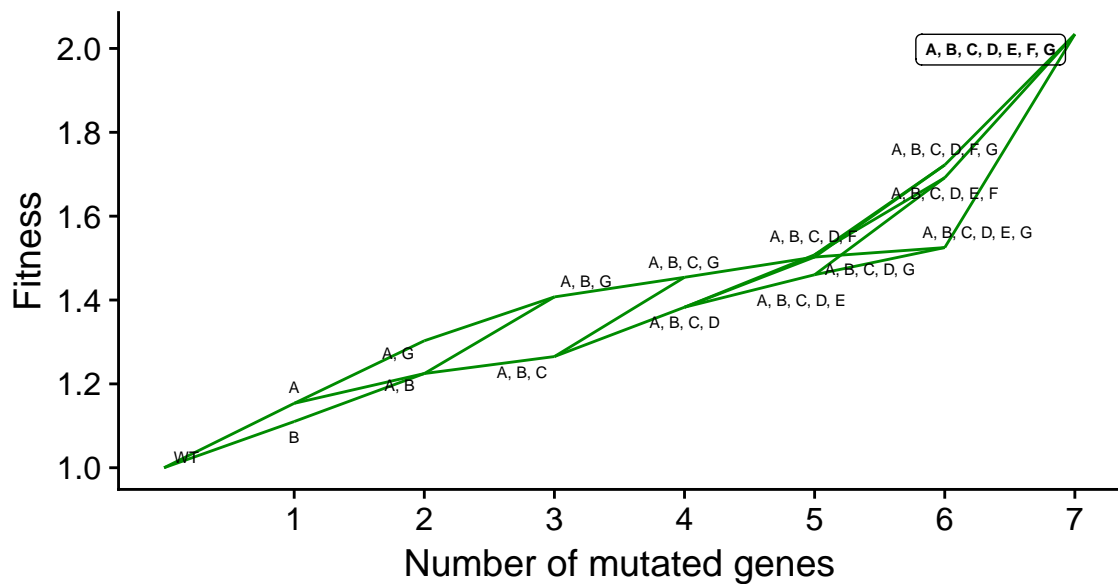

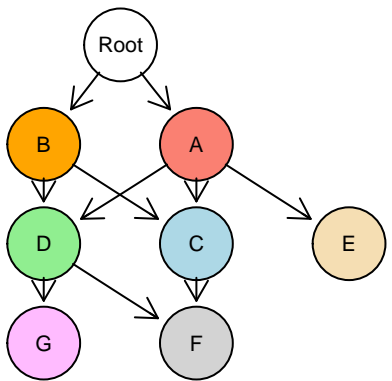

ID **NL2plam10LkyAR93o**  
 acc genotypes **20**  
 peaks no back **1**  
 removed edges **0**  
 prop rem edges **0**

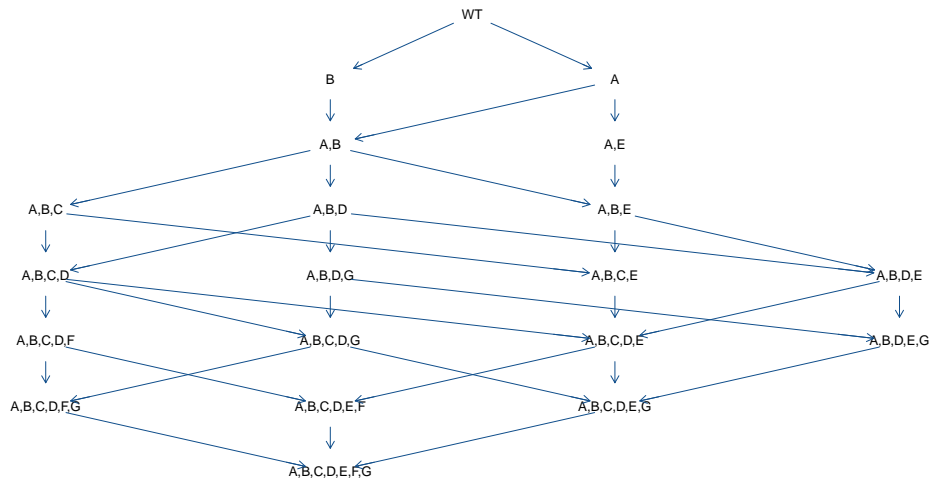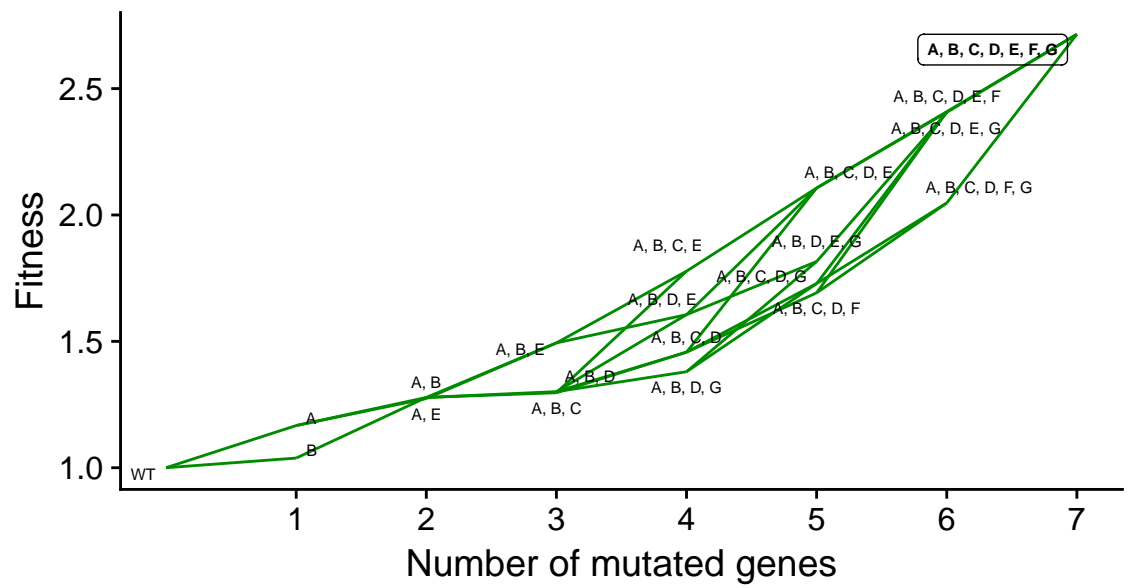

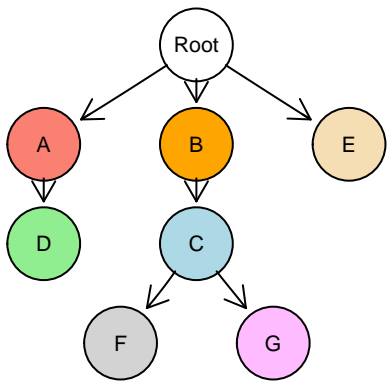

*ID* nNXWsbAmrror4Slel  
*acc genotypes* 36  
*peaks no back* 1  
*removed edges* 0  
*prop rem edges* 0

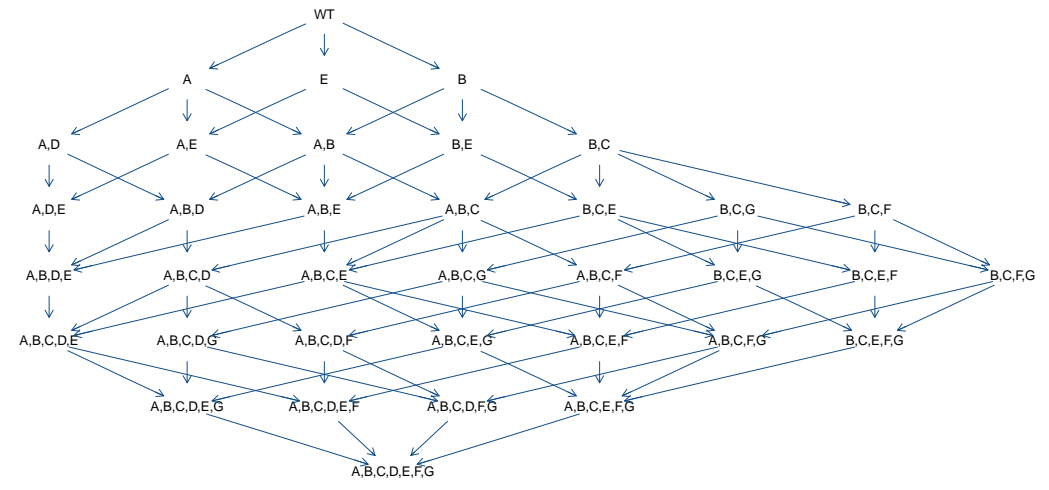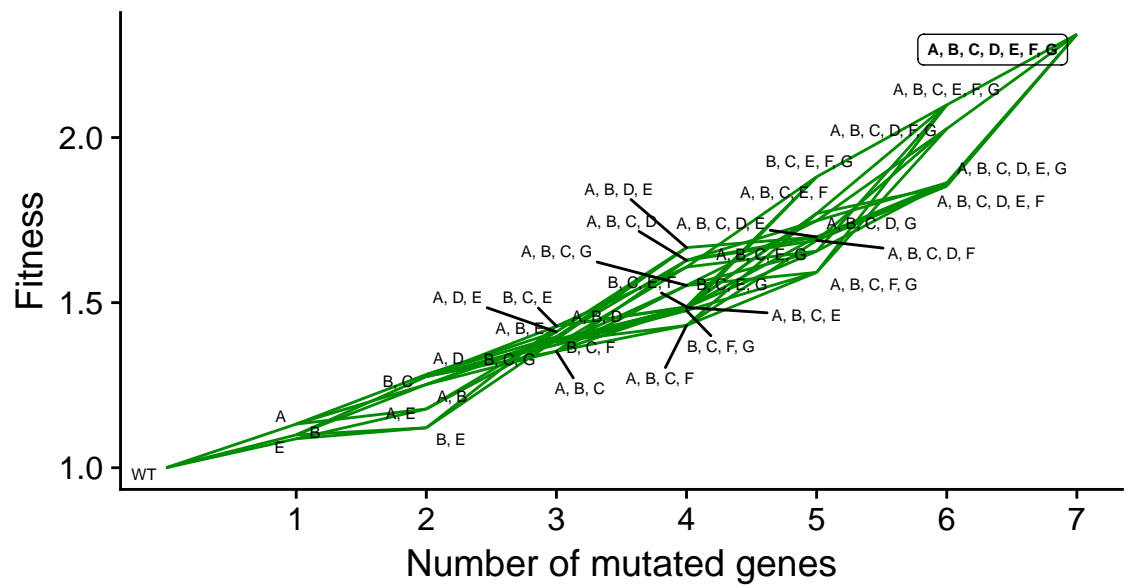

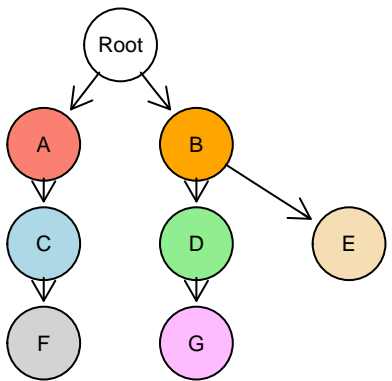

ID **NP6G6AnYJEoAMZzC**  
 acc genotypes **28**  
 peaks no back **1**  
 removed edges **0**  
 prop rem edges **0**

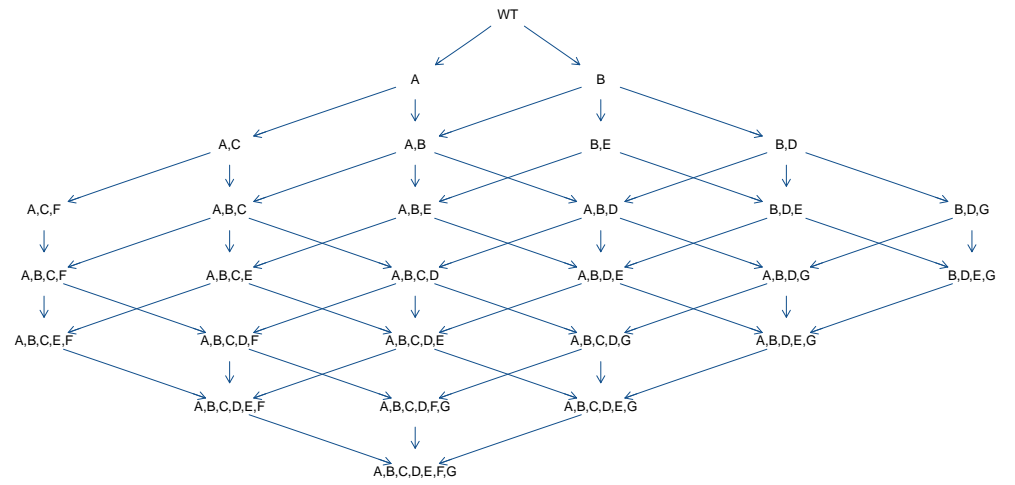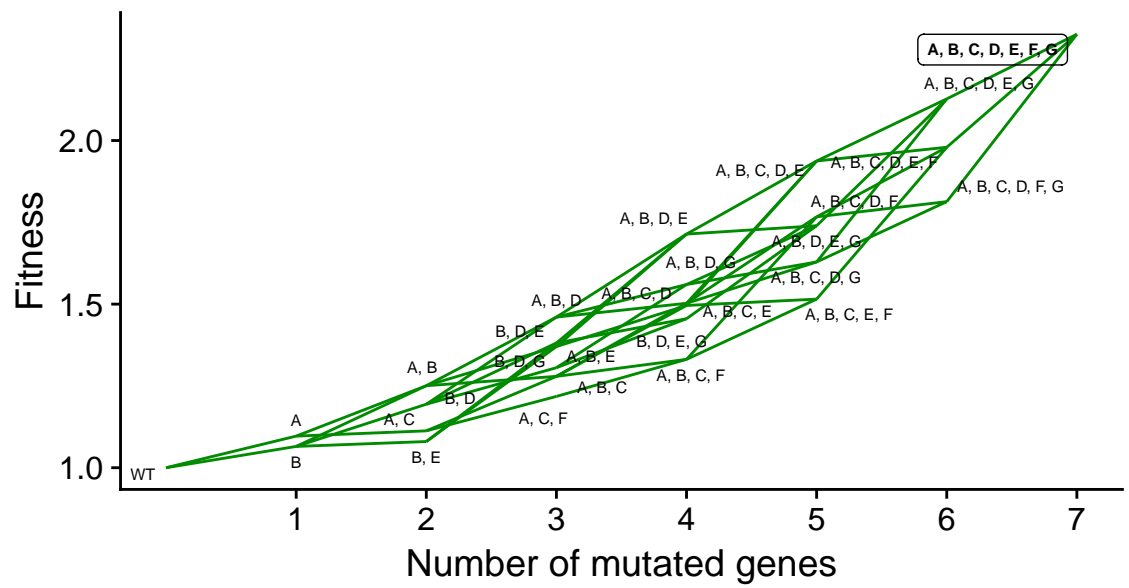

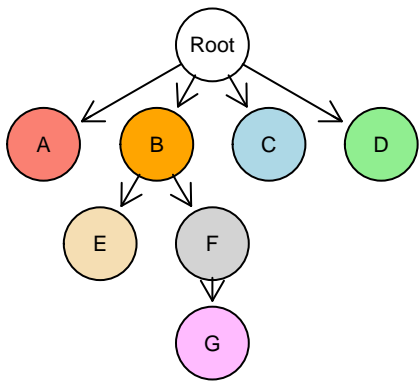

ID NQkZsXiFwR5kJZQb  
 acc genotypes 56  
 peaks no back 1  
 removed edges 0  
 prop rem edges 0

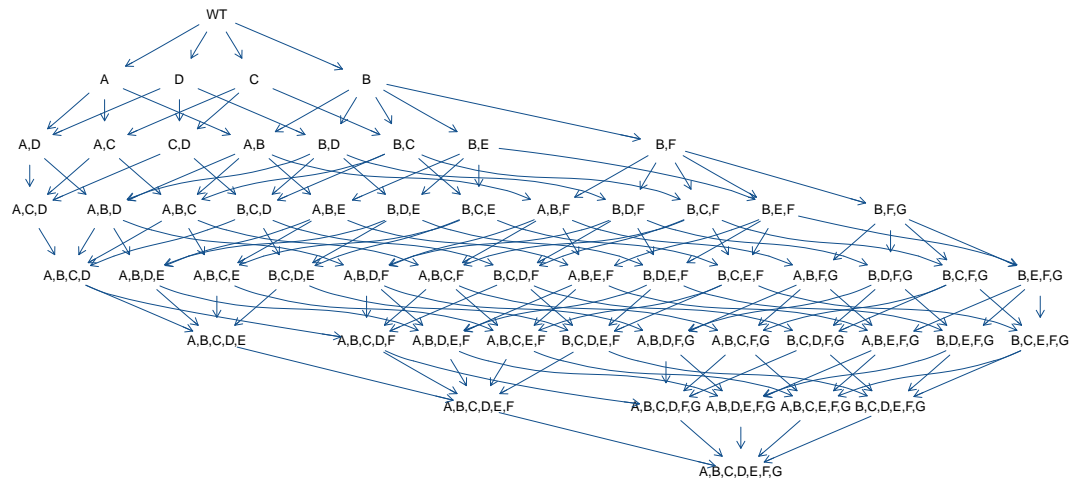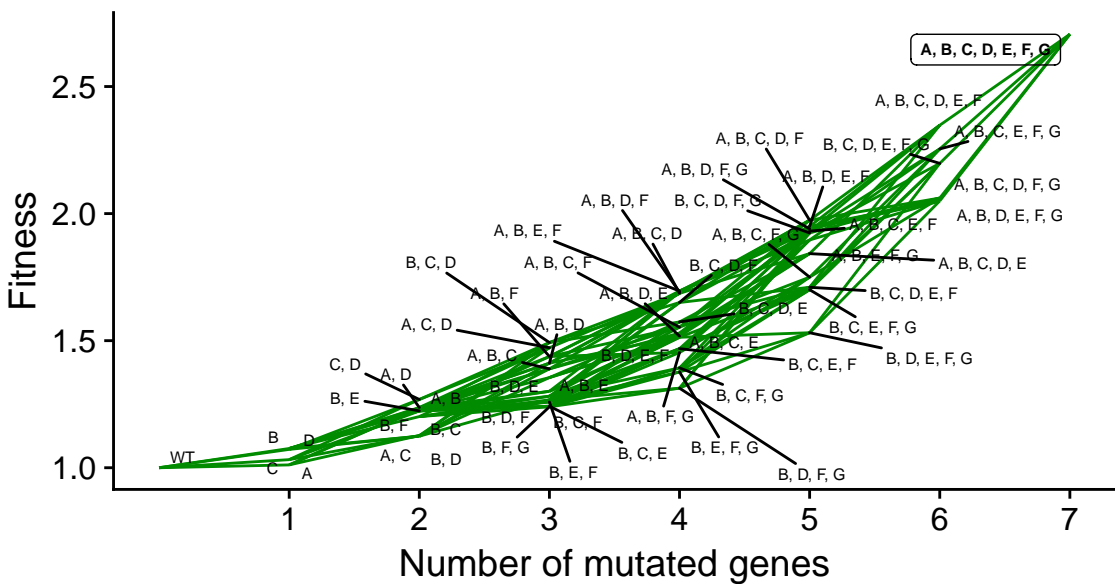

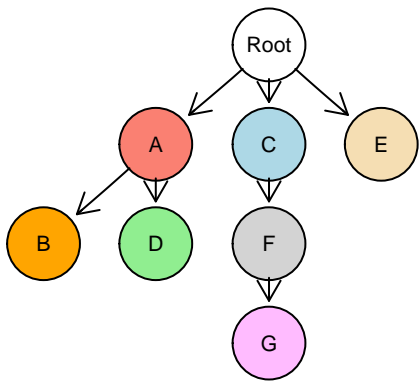

ID **O9dkG7dXRCSpbF7s**  
 acc genotypes **40**  
 peaks no back **1**  
 removed edges **0**  
 prop rem edges **0**

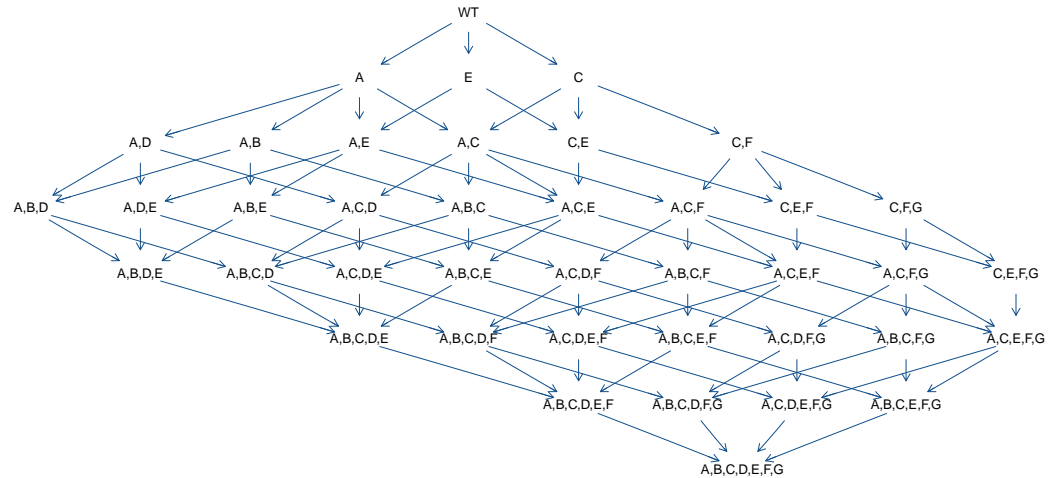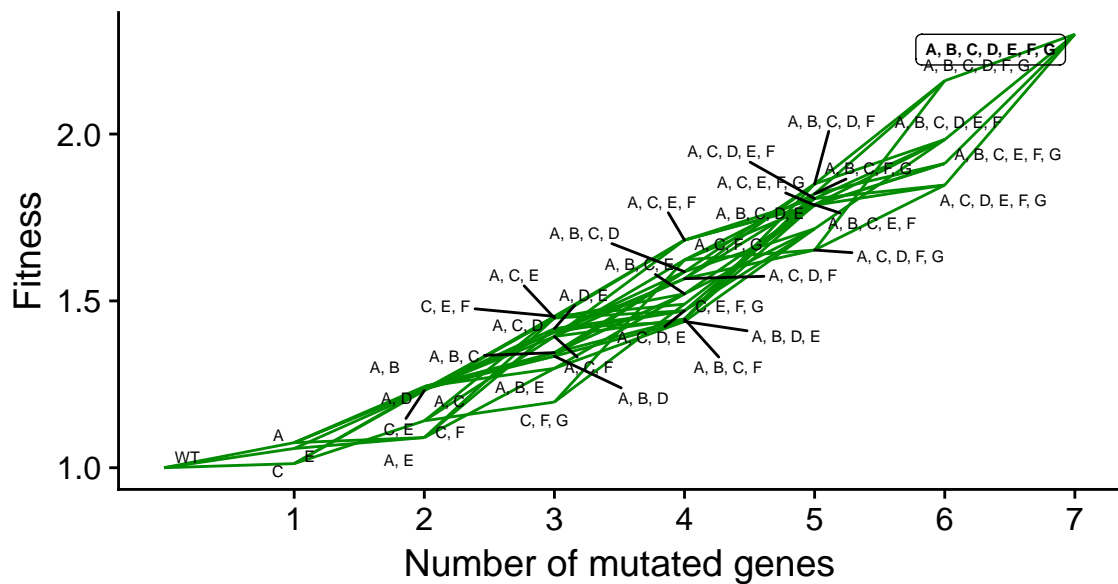

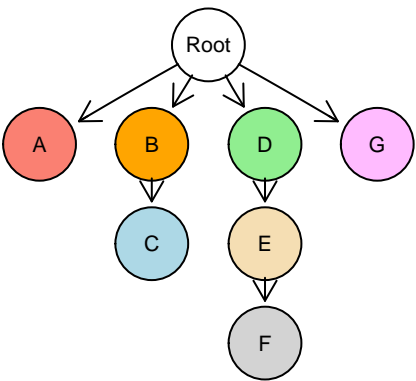

ID **o9zATJwfW4X1dLDs**  
 acc genotypes **48**  
 peaks no back **1**  
 removed edges **0**  
 prop rem edges **0**

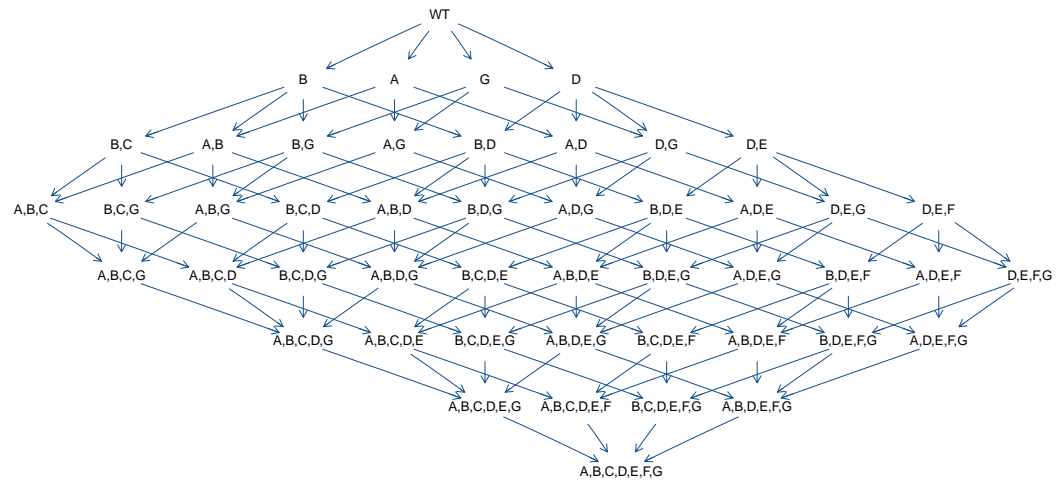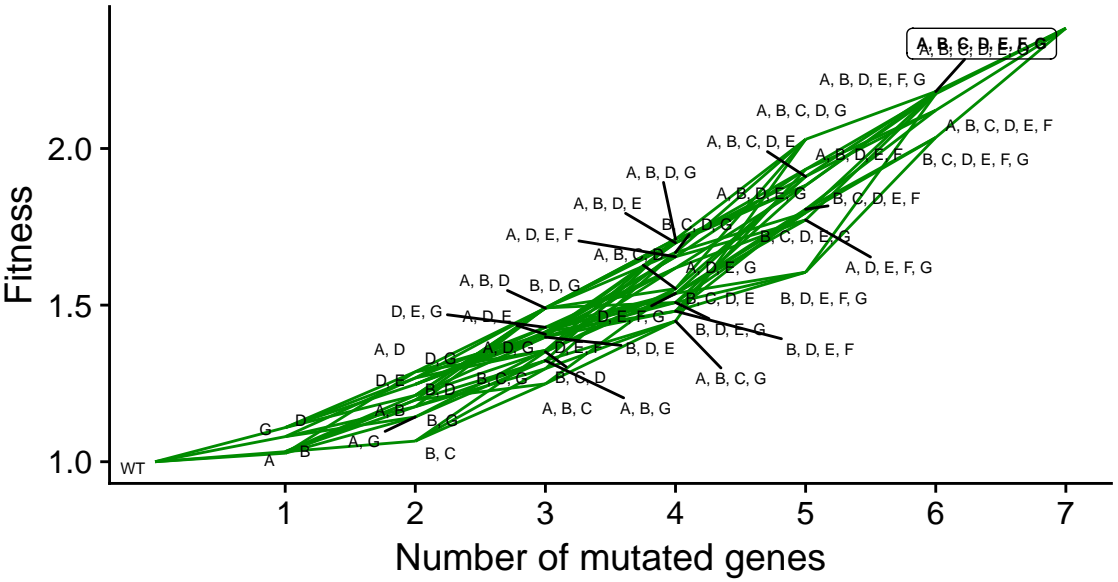



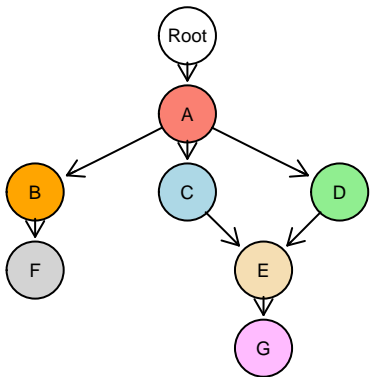

*ID* oZm9q2fpYypg1gEQ  
*acc genotypes* 19  
*peaks no back* 1  
*removed edges* 0  
*prop rem edges* 0

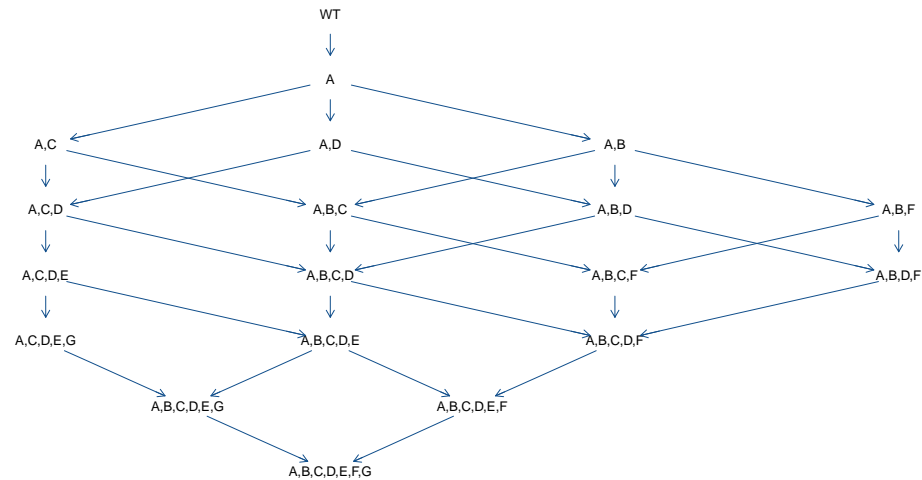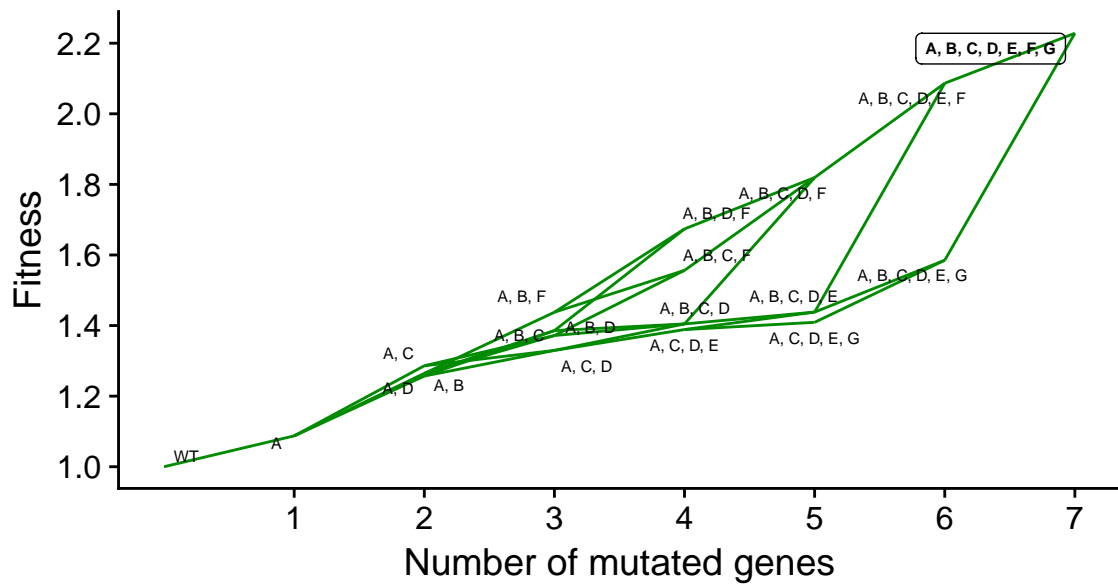

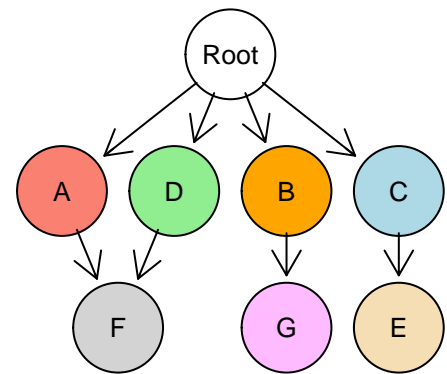

ID P6fkPLOb9jfitZfv  
 acc genotypes 45  
 peaks no back 1  
 removed edges 0  
 prop rem edges 0

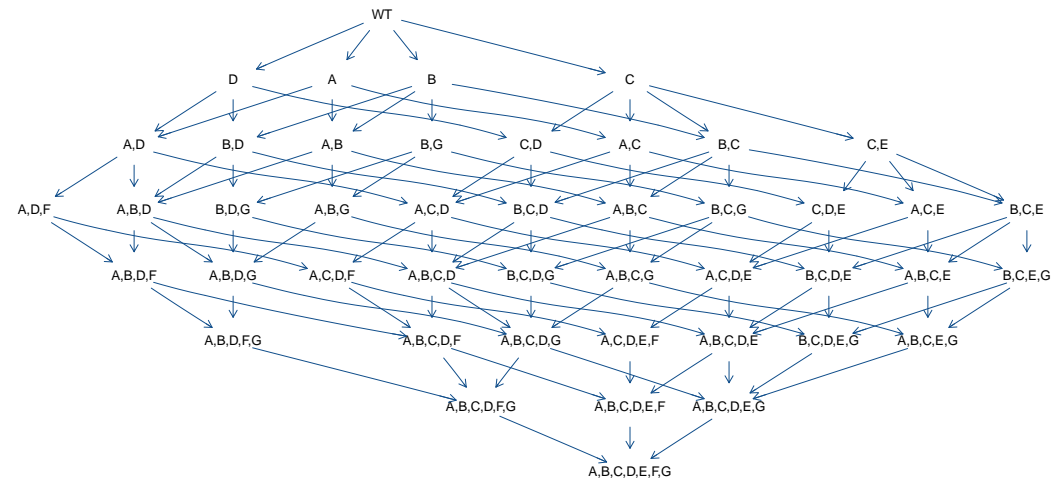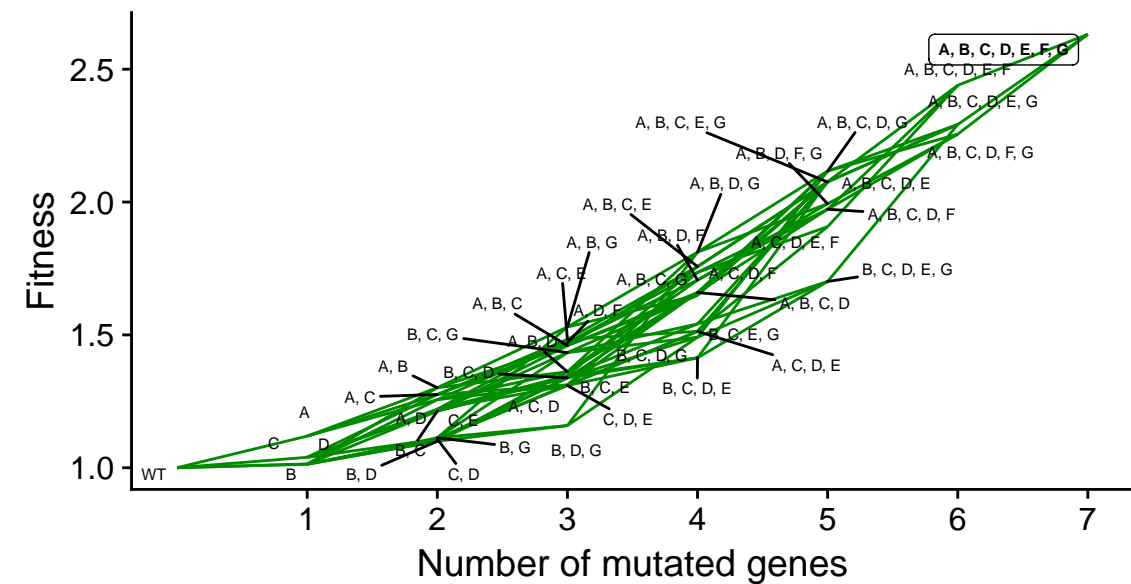

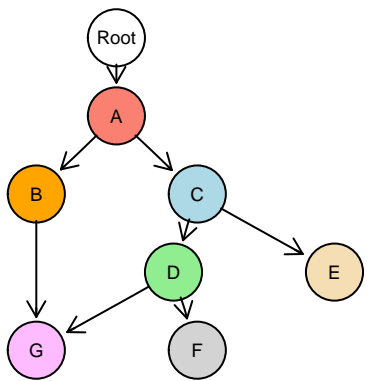

*ID* pDRZFntEs1roodY8  
*acc genotypes* 19  
*peaks no back* 1  
*removed edges* 0  
*prop rem edges* 0

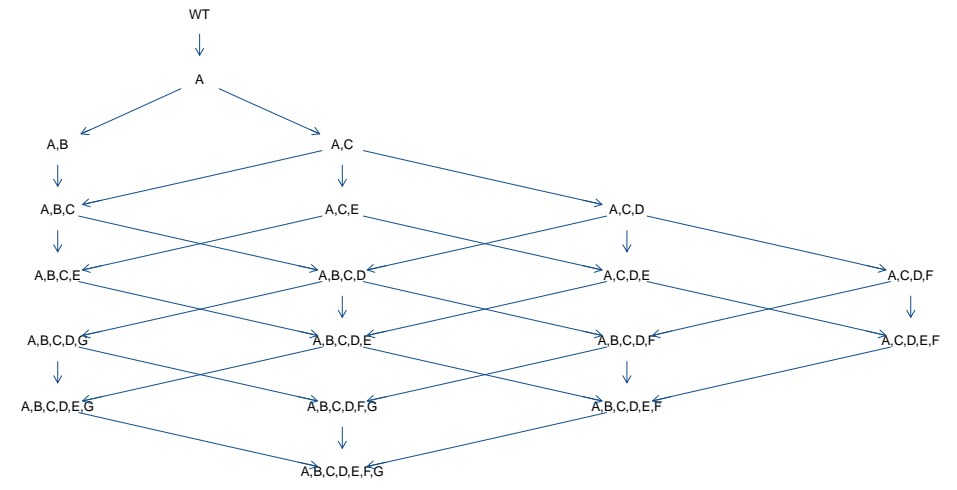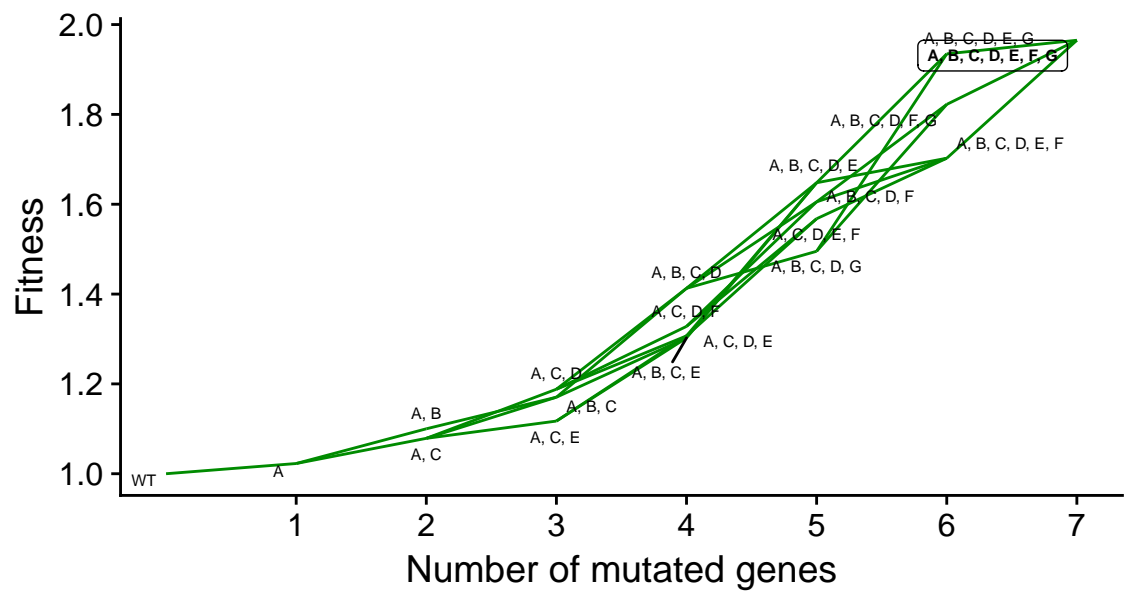





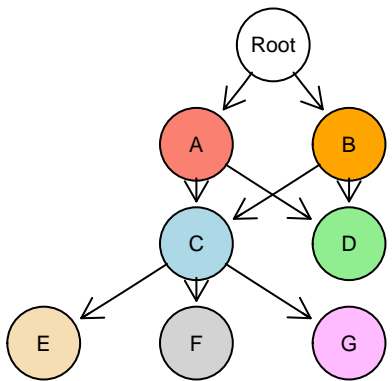

ID **q10sOtkvPmaBzPDOV**  
 acc genotypes **21**  
 peaks no back 1  
 removed edges 0  
 prop rem edges 0

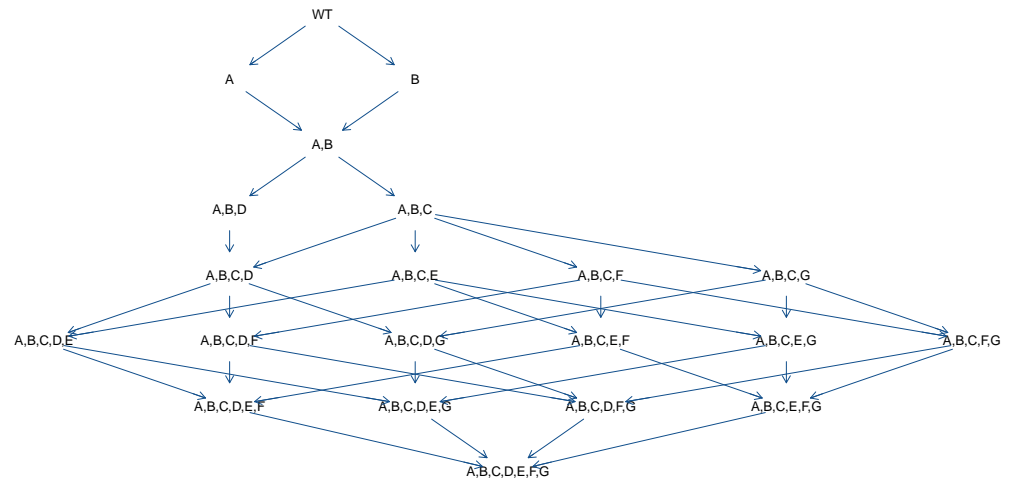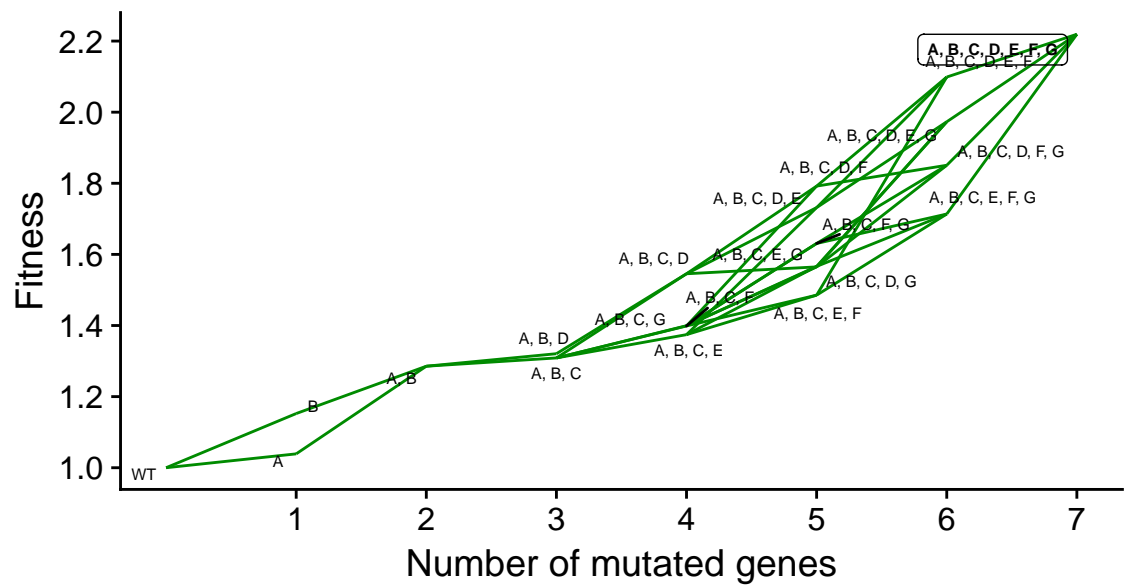

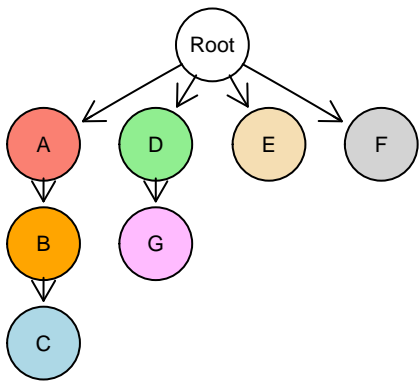

*ID* q10upXvME3iKLaWcZ  
*acc genotypes* 48  
*peaks no back* 1  
*removed edges* 0  
*prop rem edges* 0

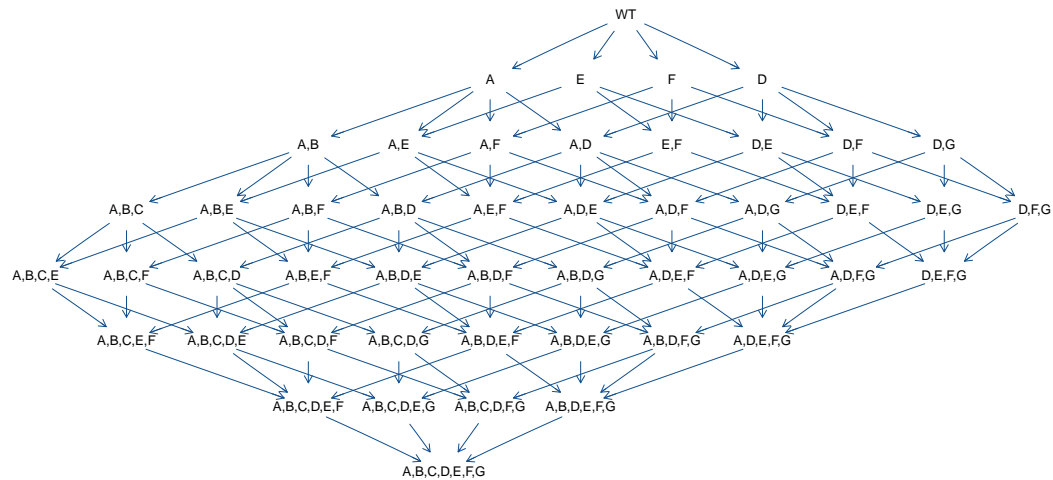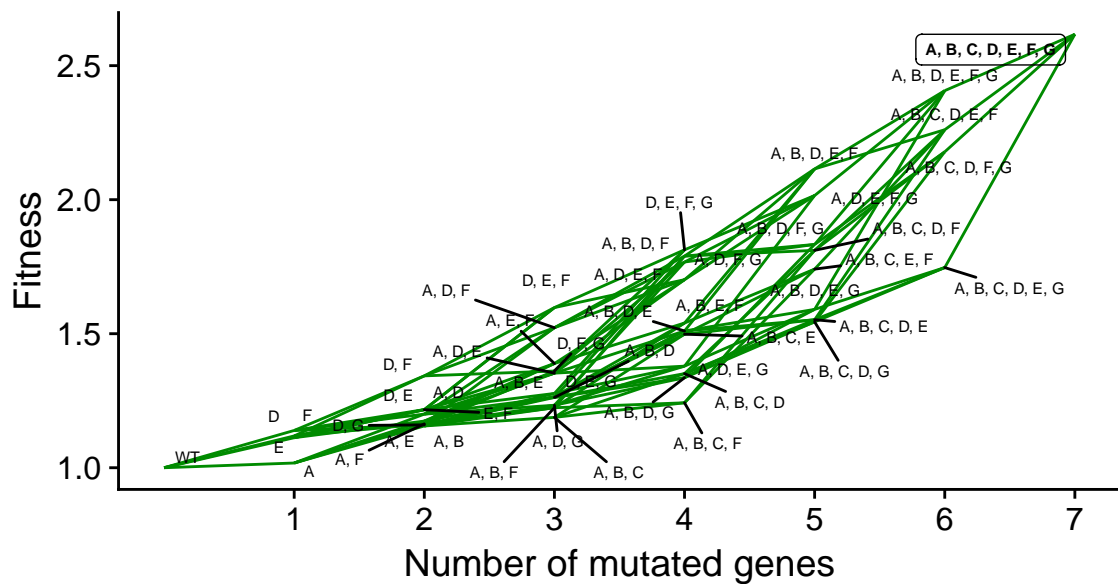

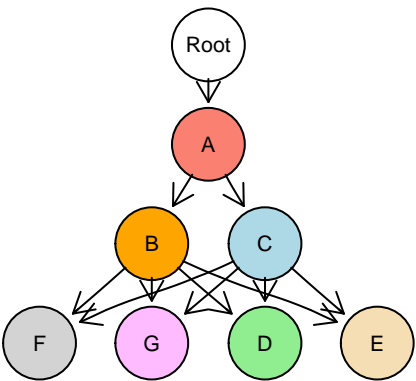

*ID* q3bB6O4aHcWy2GNL  
*acc genotypes* 20  
*peaks no back* 1  
*removed edges* 0  
*prop rem edges* 0

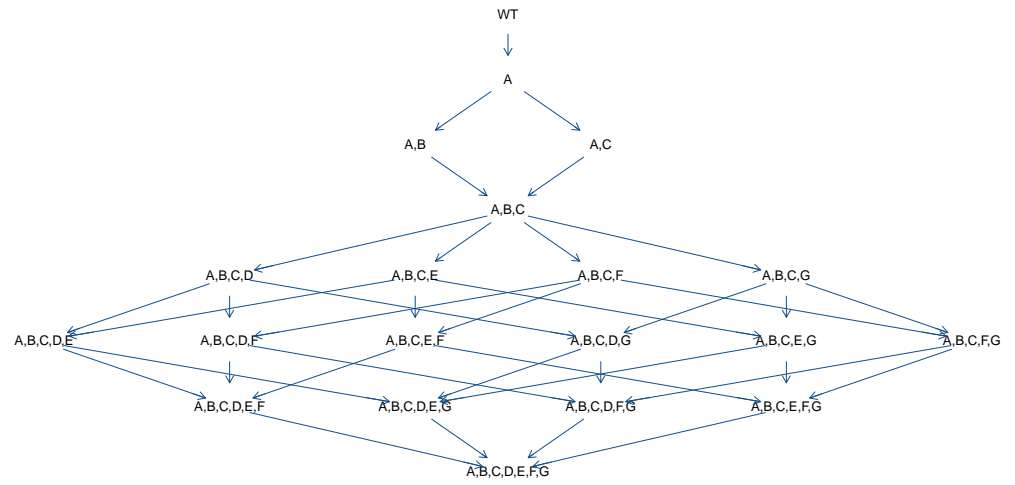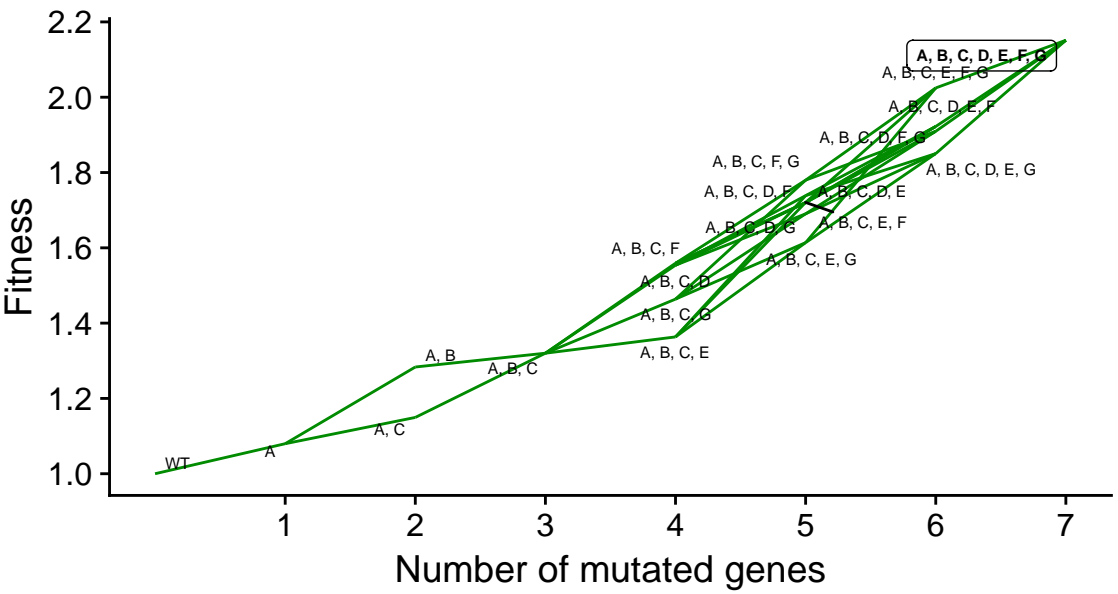



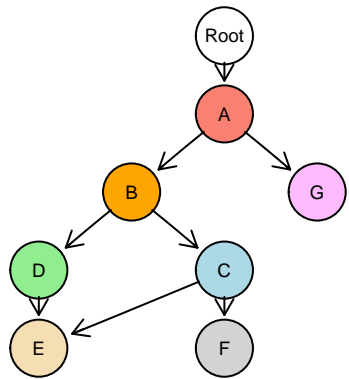

ID [qDTXWJ10Vx4dad6eV](#)  
 acc genotypes 19  
 peaks no back 1  
 removed edges 0  
 prop rem edges 0

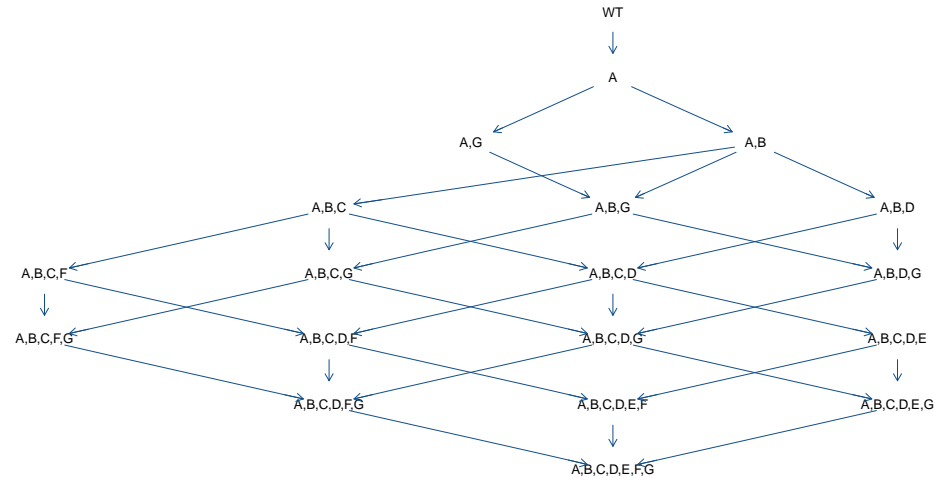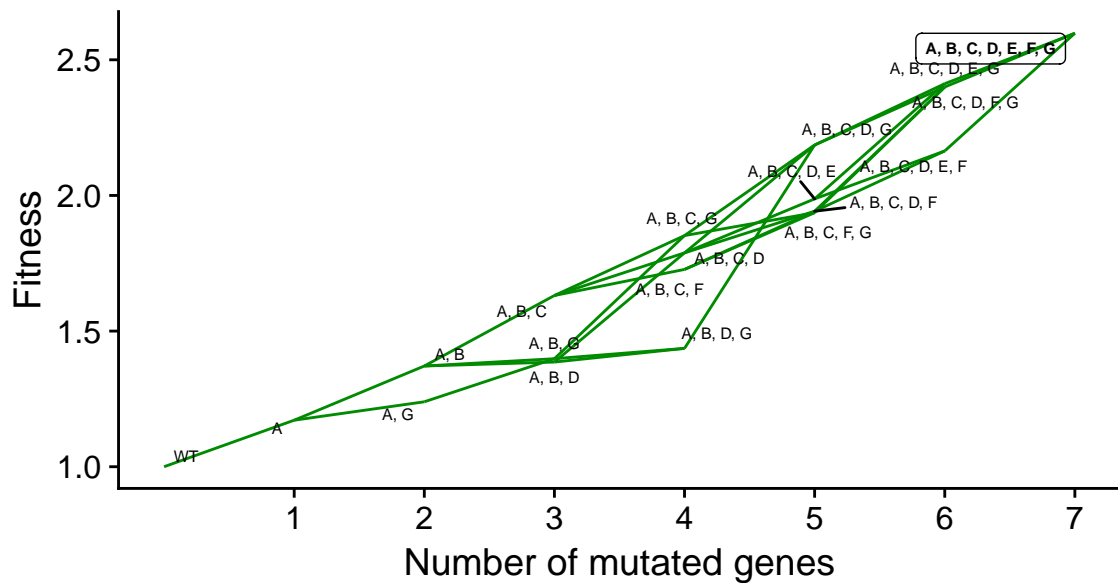

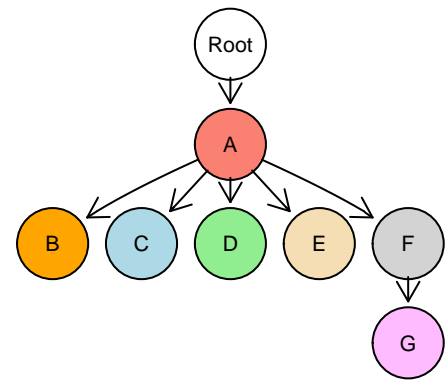

*ID*      **qdVBLPcBGWHlqm6a**  
*acc genotypes*    **49**  
*peaks no back*     **1**  
*removed edges*    **0**  
*prop rem edges*    **0**

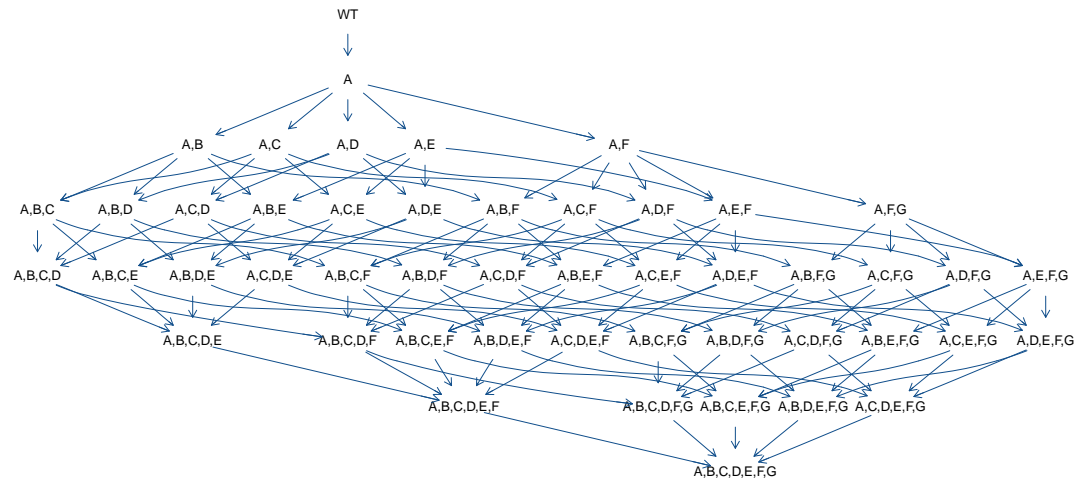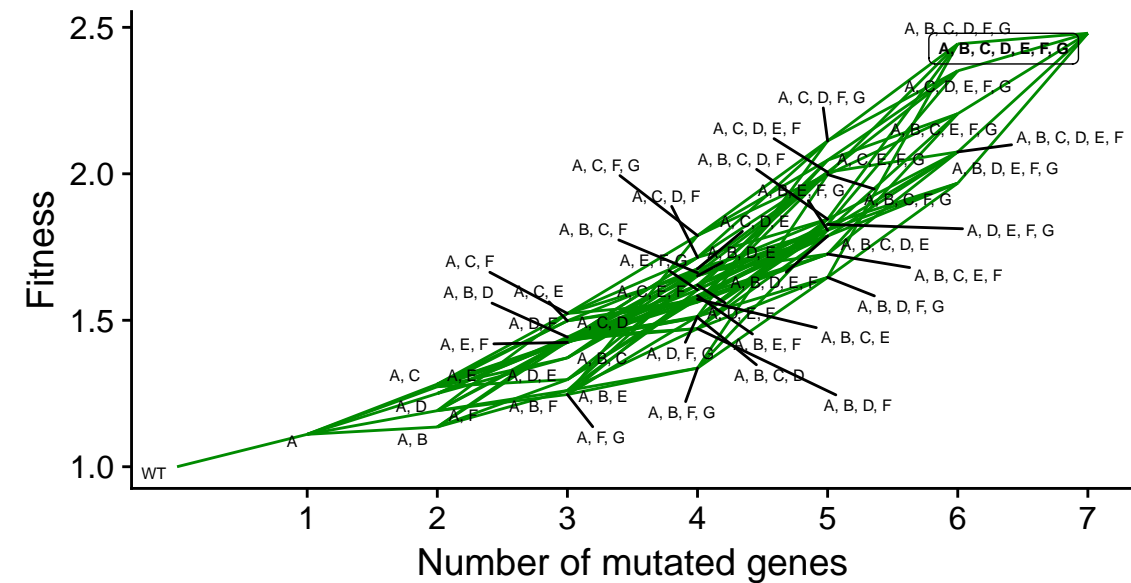

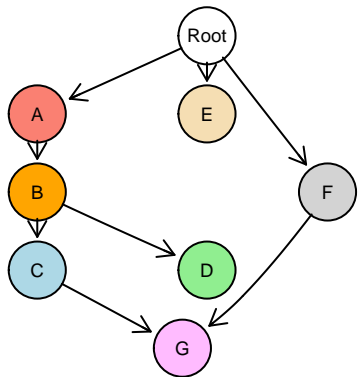

ID **QfKhJqFLfL10D8u110**  
 acc genotypes **28**  
 peaks no back **1**  
 removed edges **0**  
 prop rem edges **0**

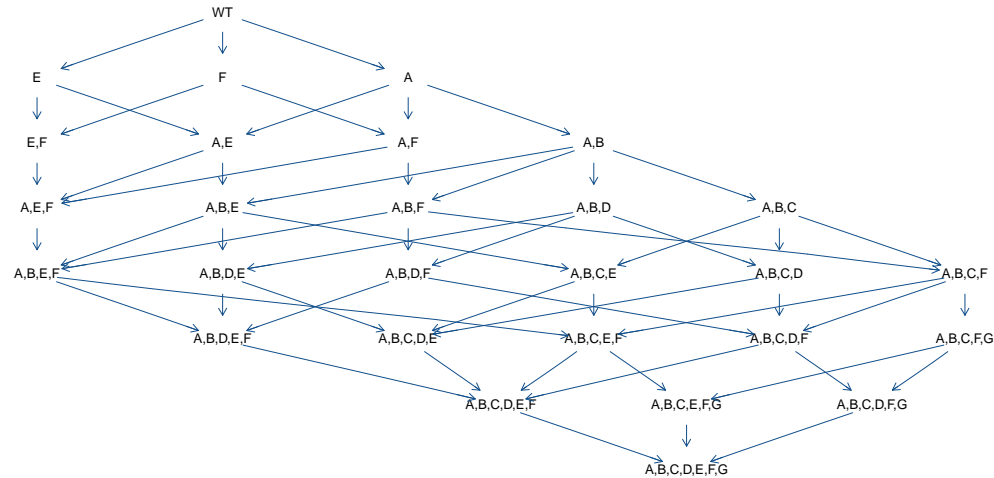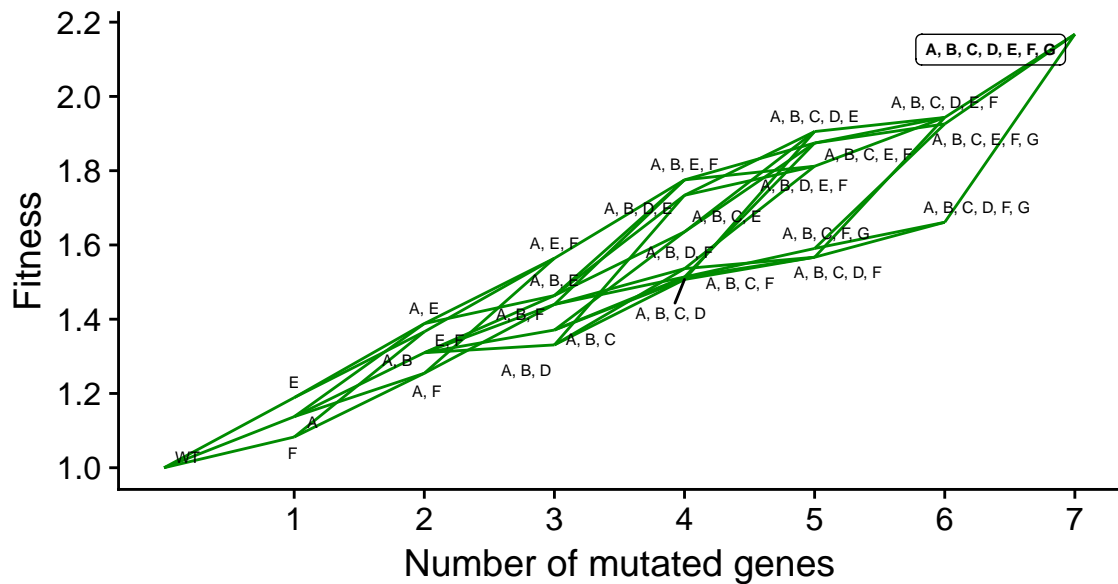

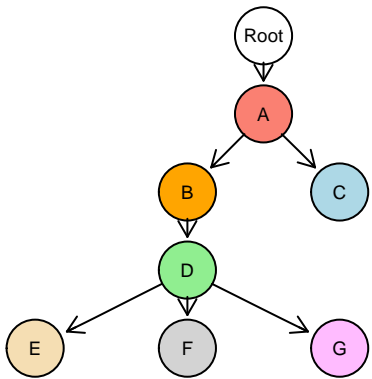

*ID* qhzHLgiriL8adNfAJ  
*acc genotypes* 21  
*peaks no back* 1  
*removed edges* 0  
*prop rem edges* 0

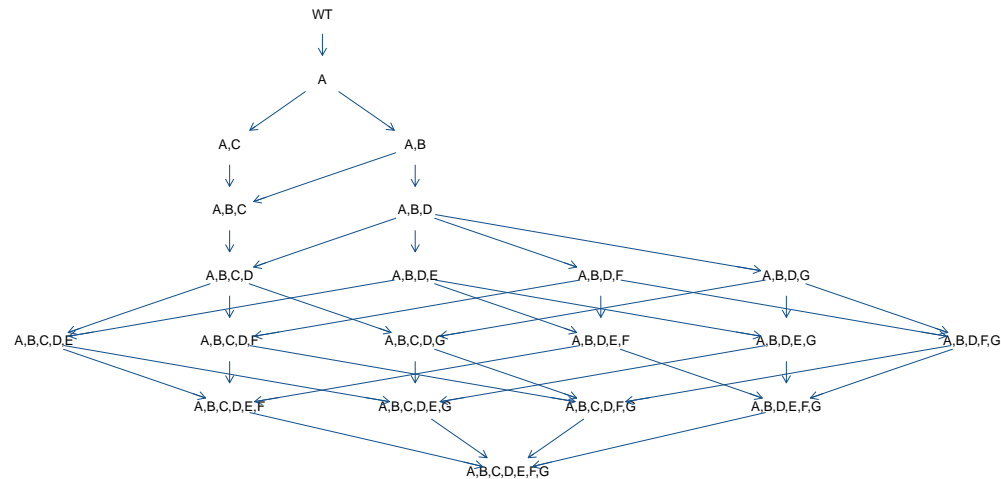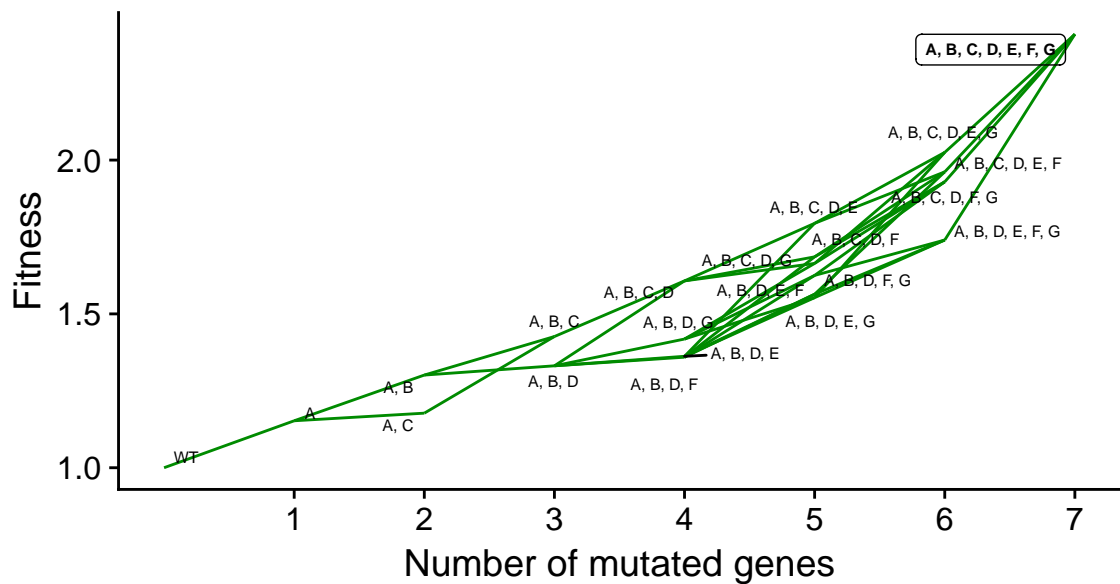

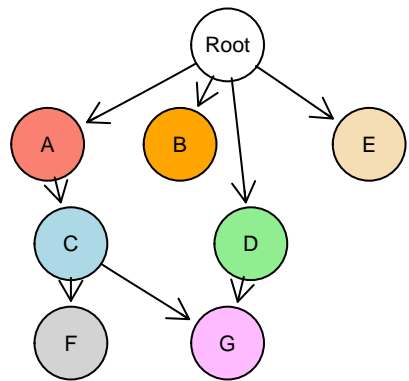

ID **qIEabZH111rt10AQ2**  
 acc genotypes **40**  
 peaks no back **1**  
 removed edges **0**  
 prop rem edges **0**

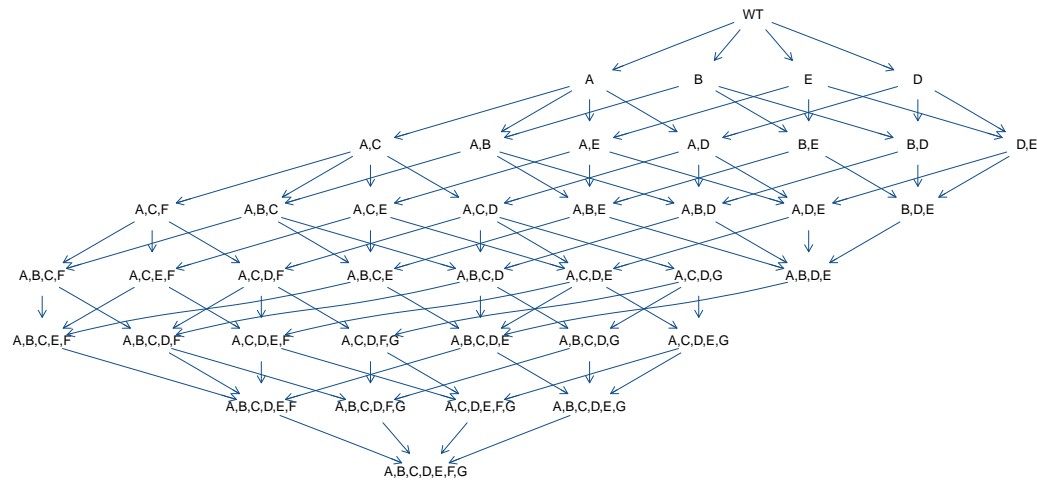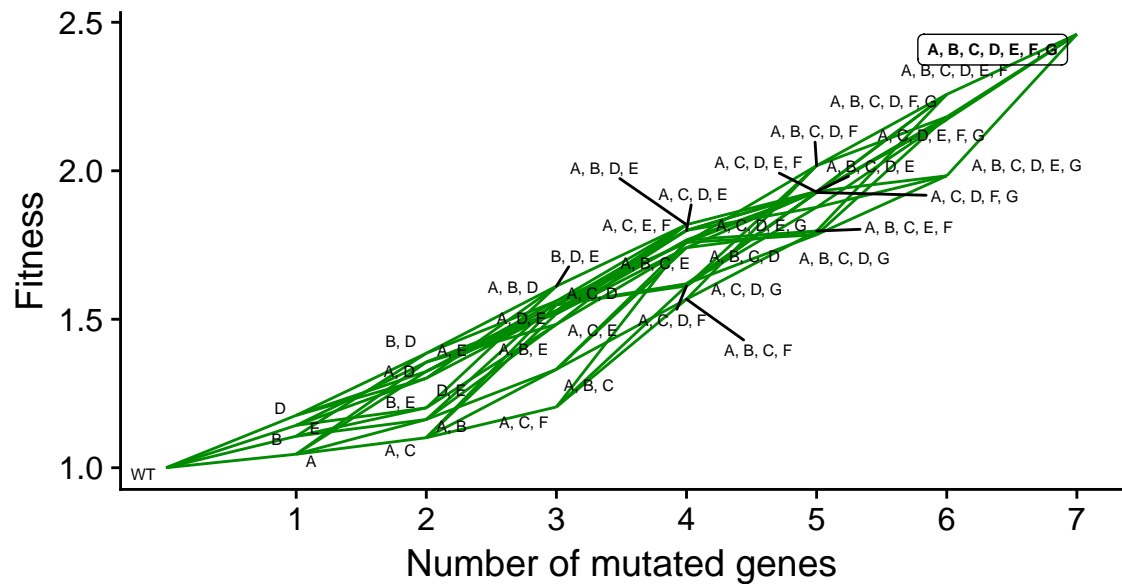

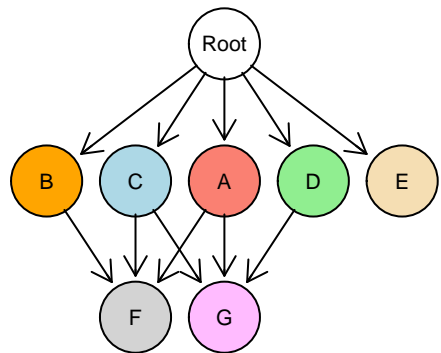

*ID* qsBbMjGmsMVjLZVW  
*acc genotypes* 42  
*peaks no back* 1  
*removed edges* 0  
*prop rem edges* 0

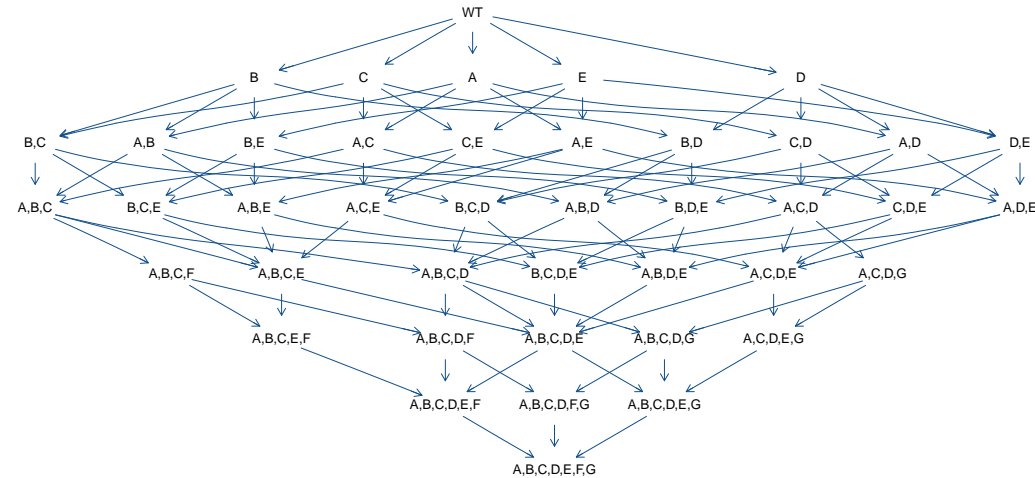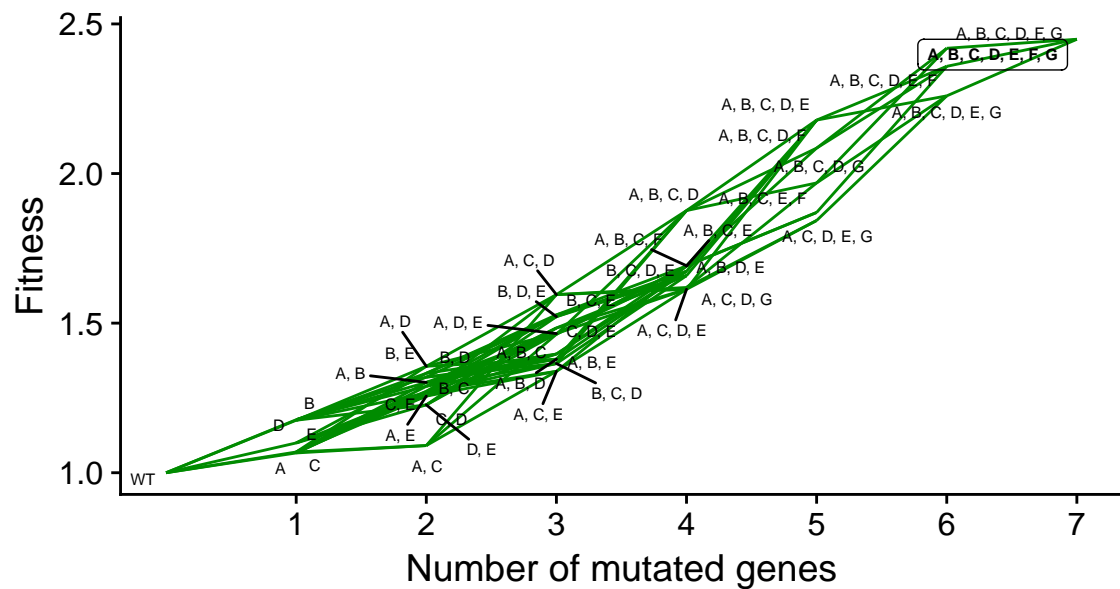

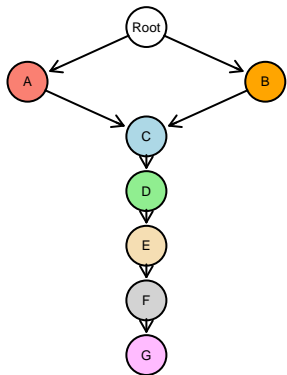

ID **QTVh104soQUgOBfKi**  
 acc genotypes **9**  
 peaks no back **1**  
 removed edges **0**  
 prop rem edges **0**

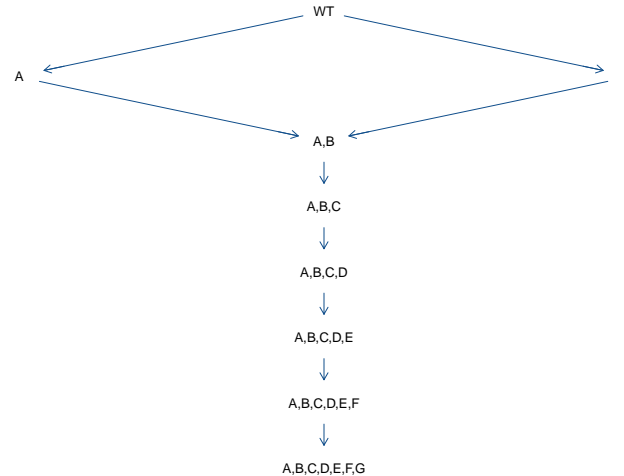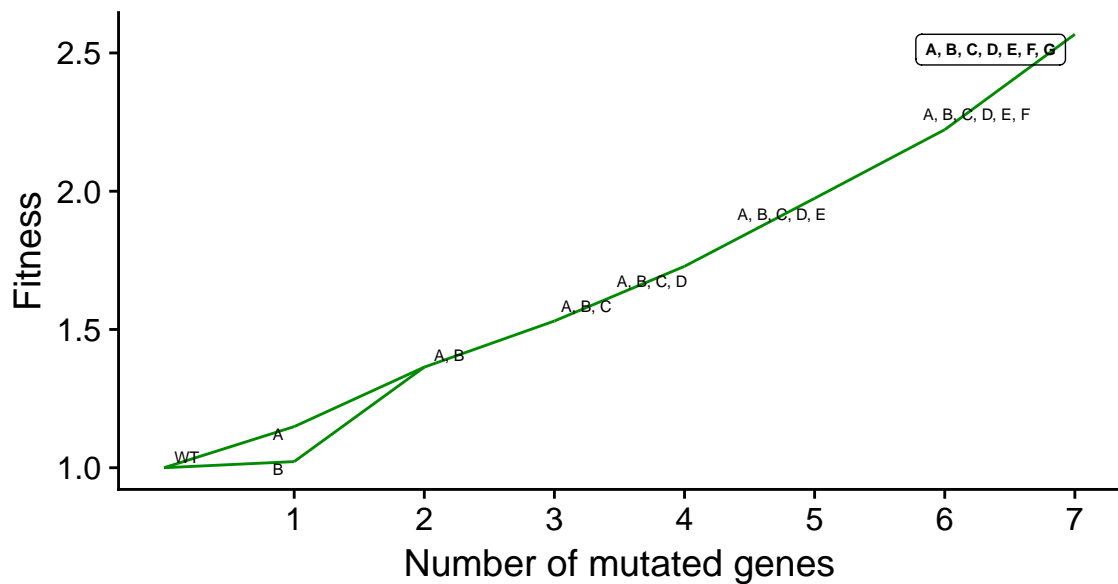

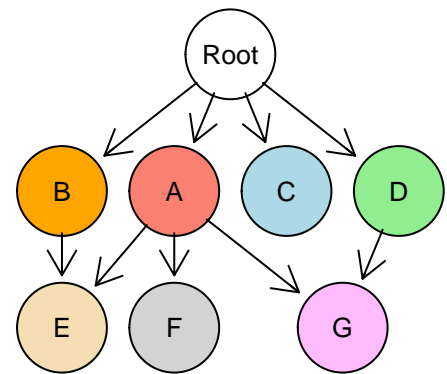

ID qYgVxb5ntdQ1oibs  
 acc genotypes 44  
 peaks no back 1  
 removed edges 0  
 prop rem edges 0

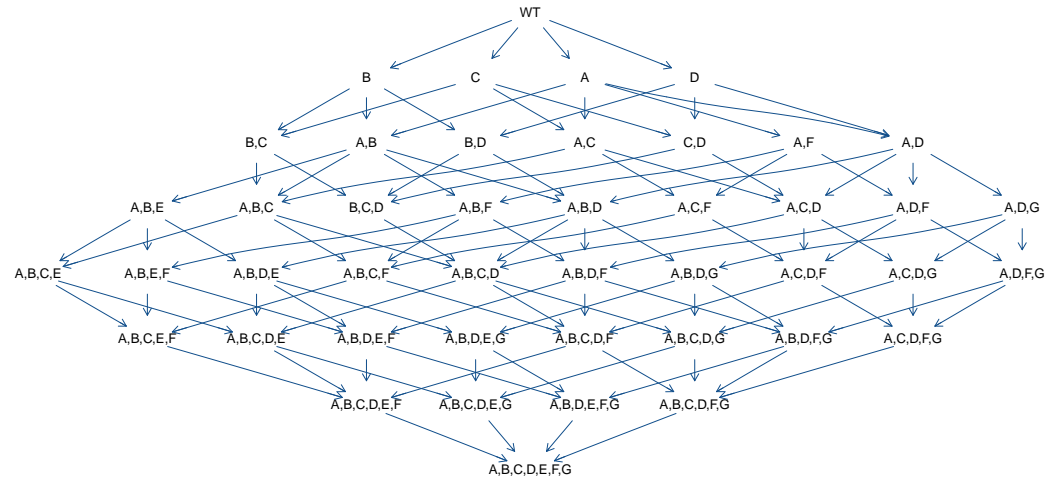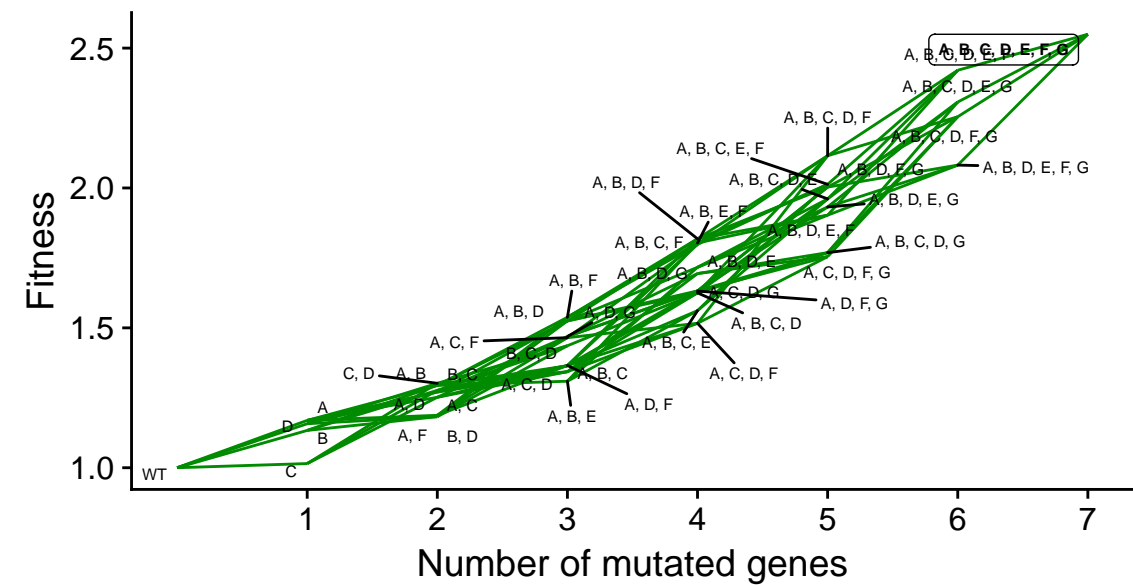



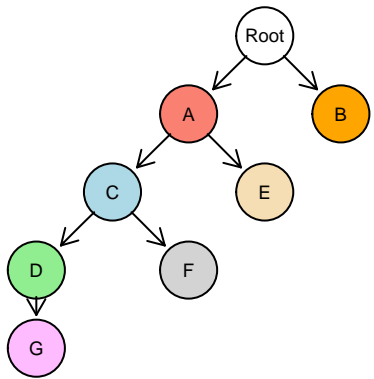

*ID* r6gSASnFWWRSp10wF  
*acc genotypes* 30  
*peaks no back* 1  
*removed edges* 0  
*prop rem edges* 0

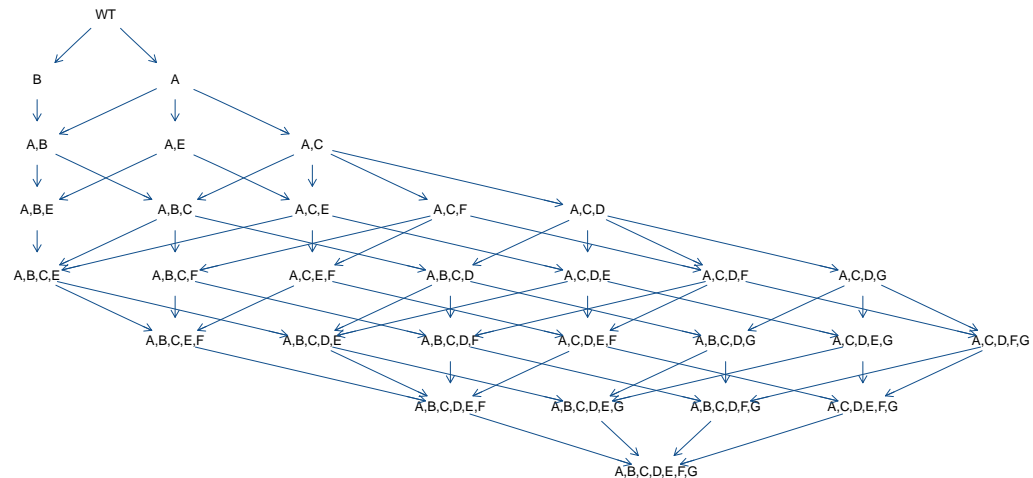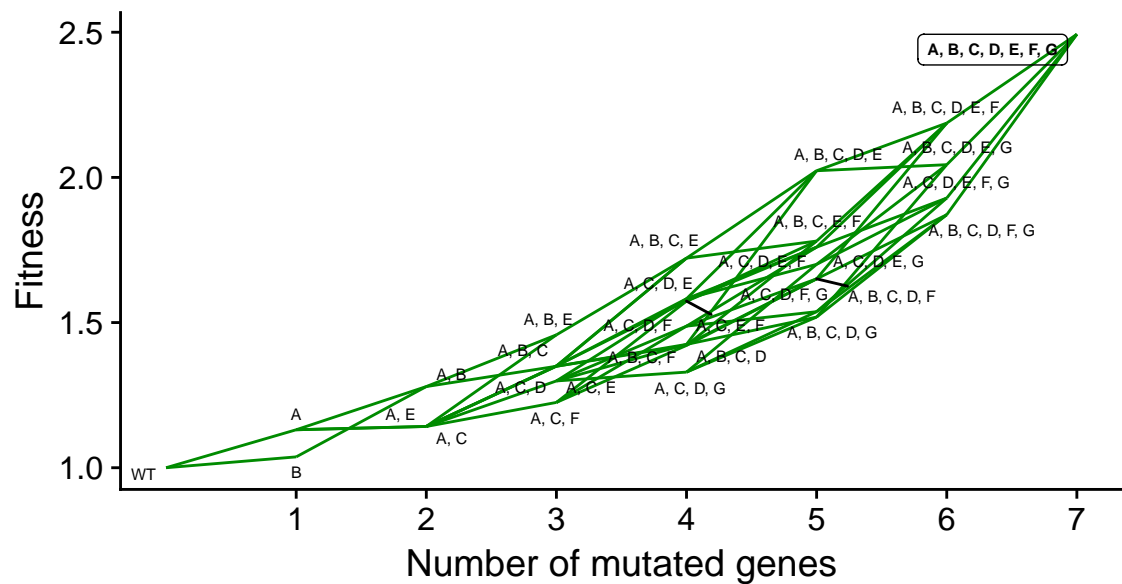

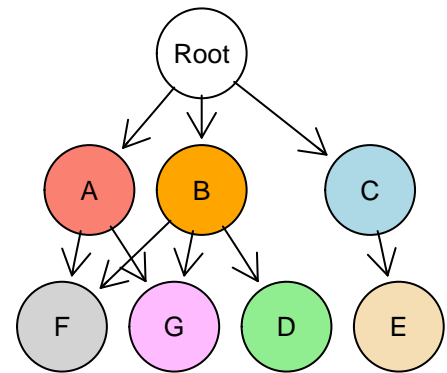

*ID* rcySfhqbP6f5Ys45  
*acc genotypes* 36  
*peaks no back* 1  
*removed edges* 0  
*prop rem edges* 0

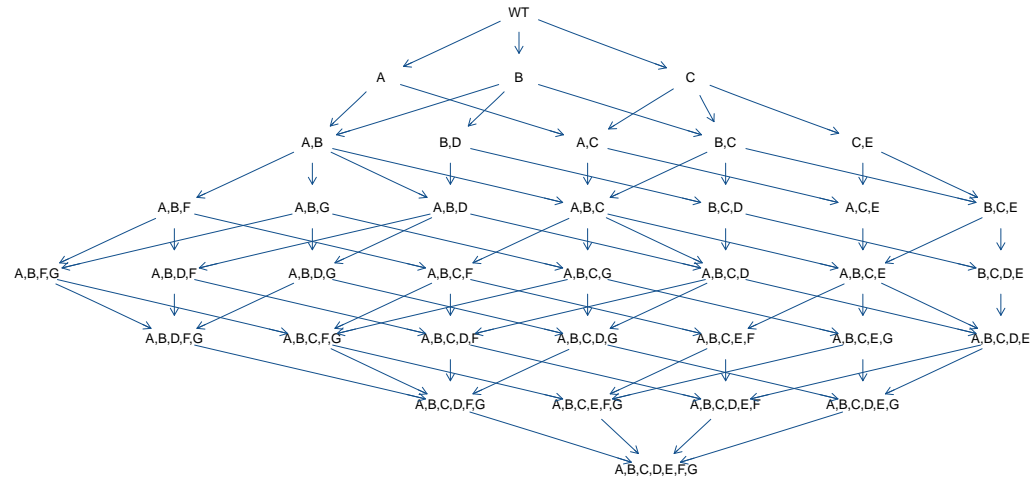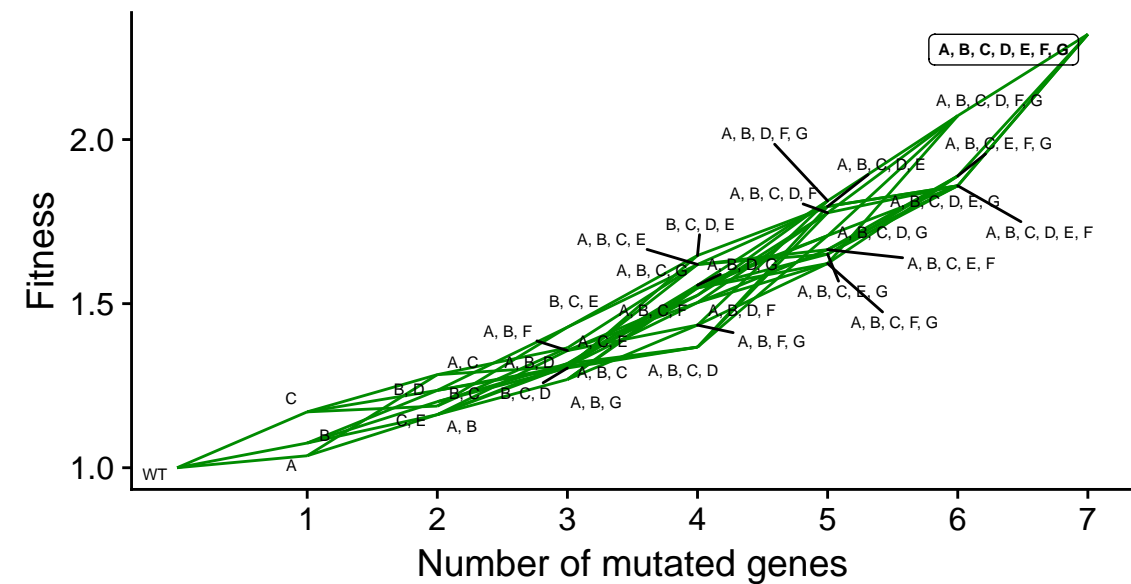

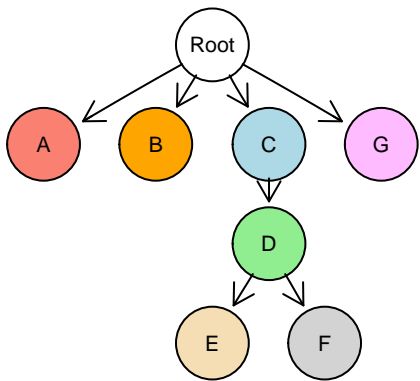

ID **RgRwHiCY10NBQ5ya4**  
 acc genotypes **48**  
 peaks no back 1  
 removed edges 0  
 prop rem edges 0

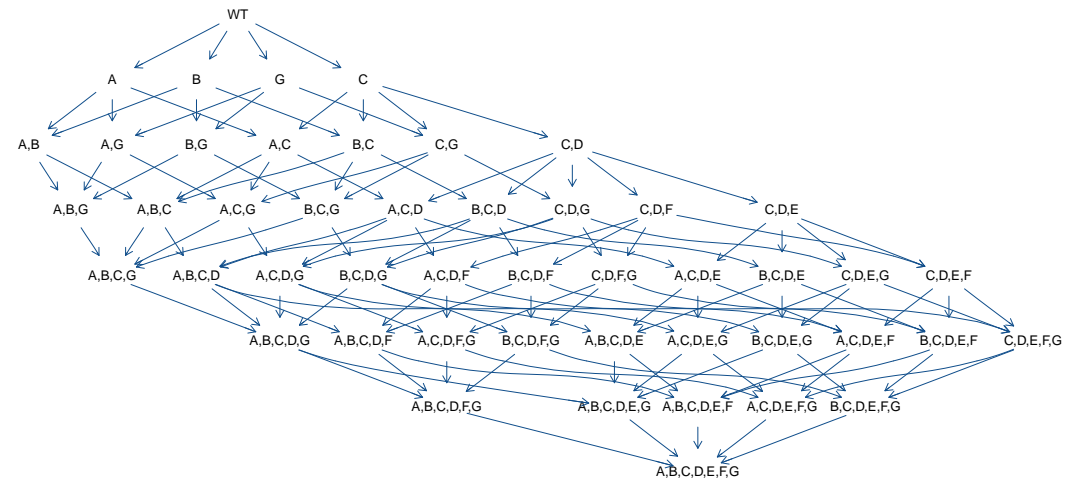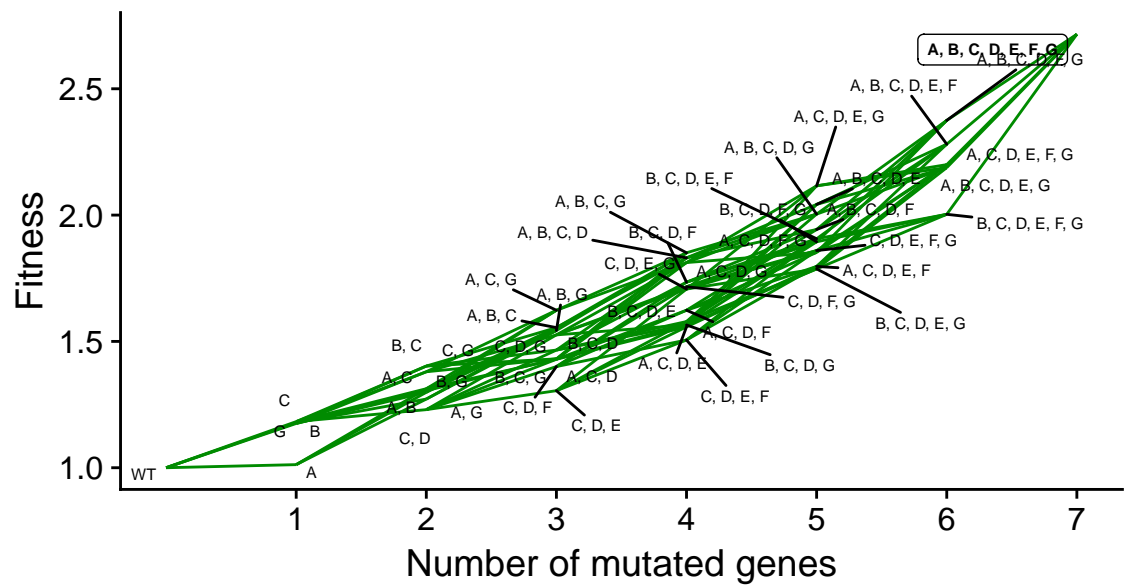

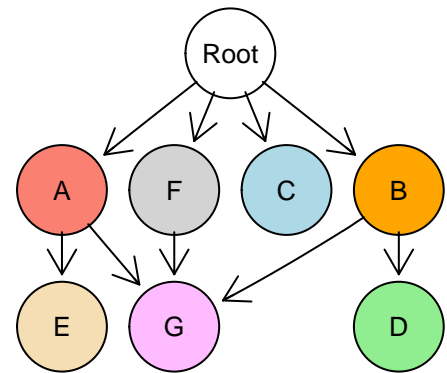

*ID* RKaZWcftCPVxJUF  
*acc genotypes* 44  
*peaks no back* 1  
*removed edges* 0  
*prop rem edges* 0

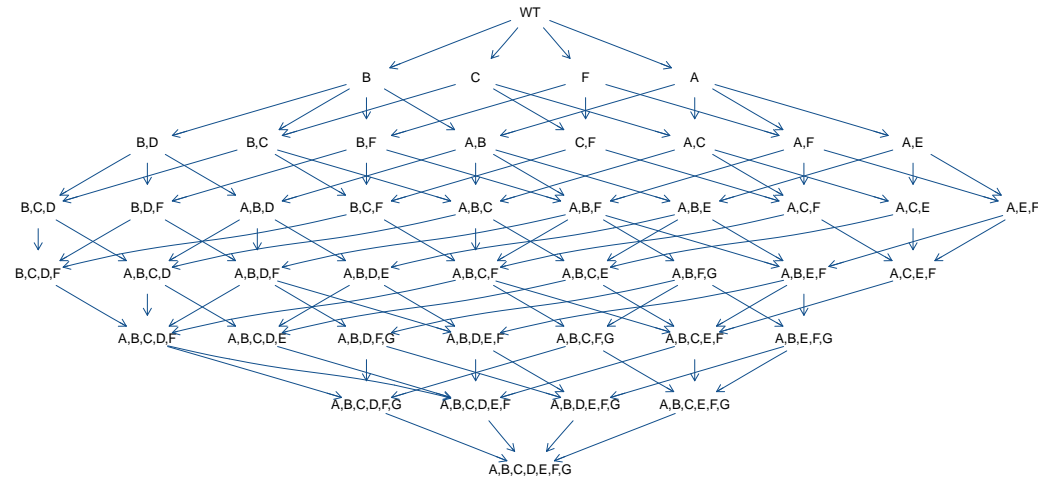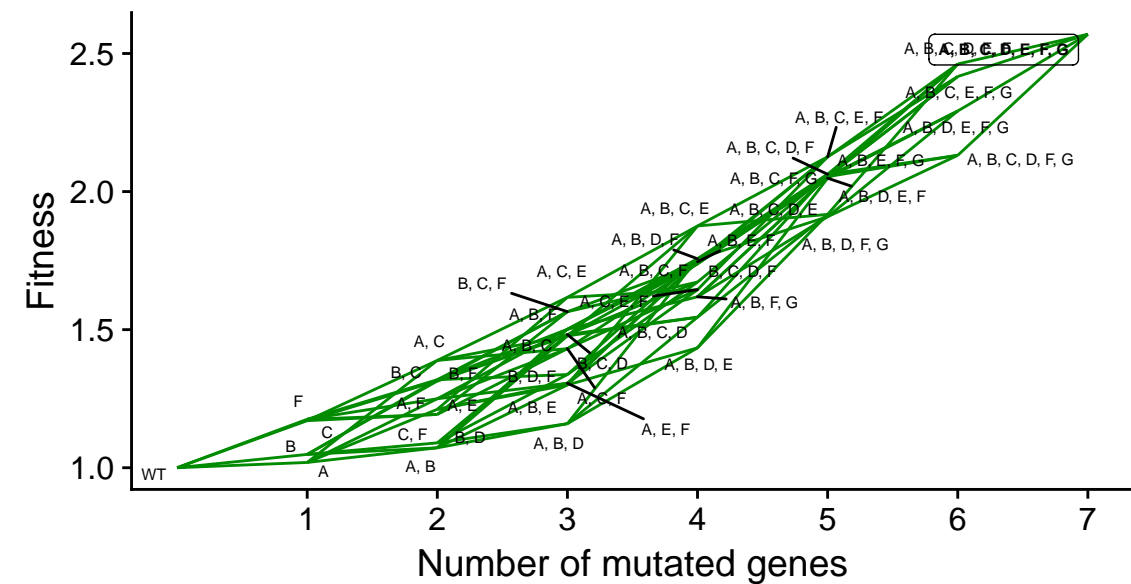

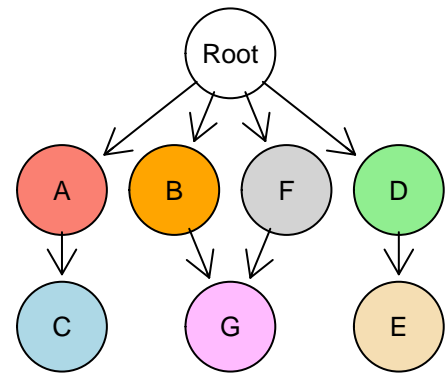

ID rokOVrDugL5VXneF  
 acc genotypes 45  
 peaks no back 1  
 removed edges 0  
 prop rem edges 0

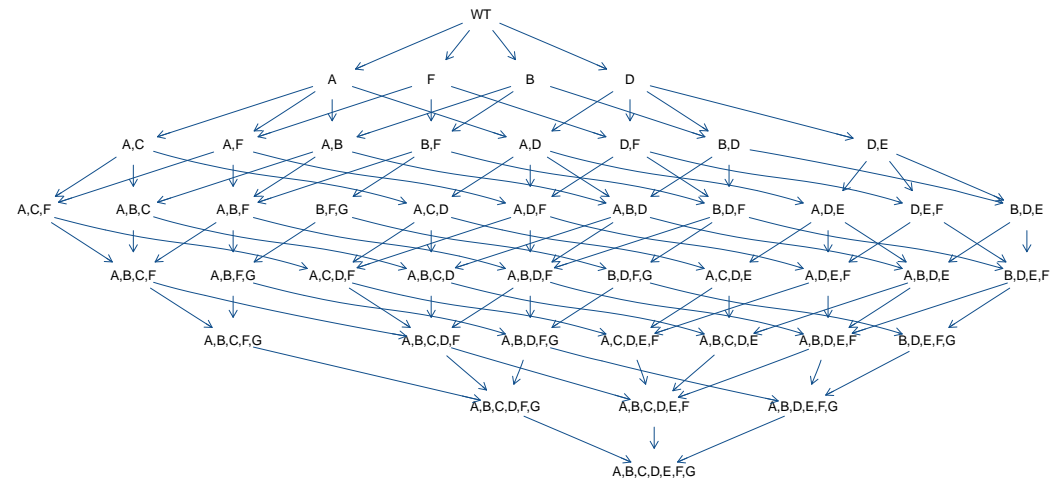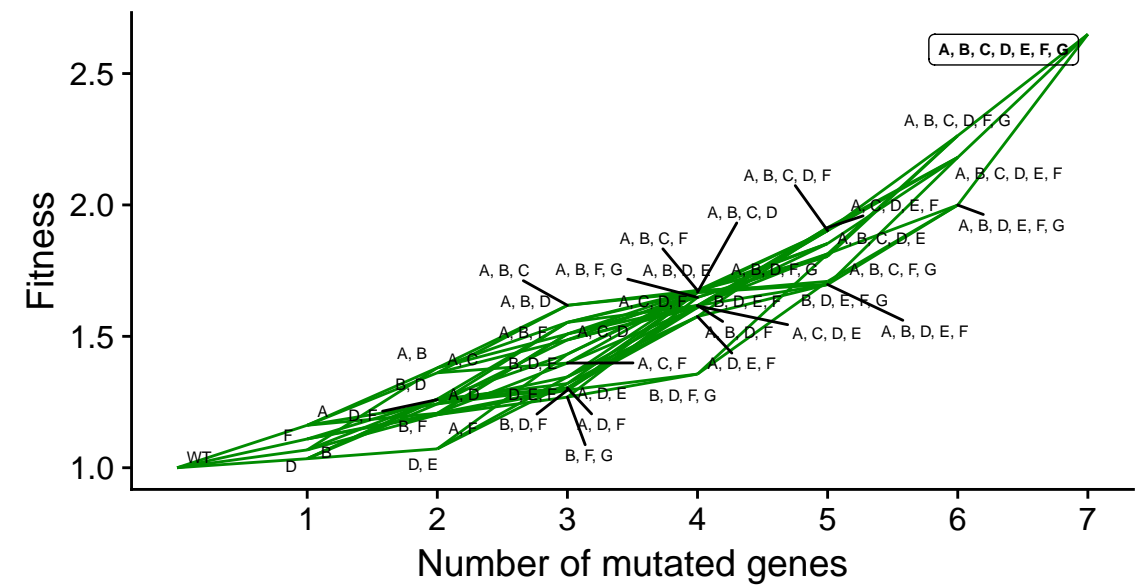

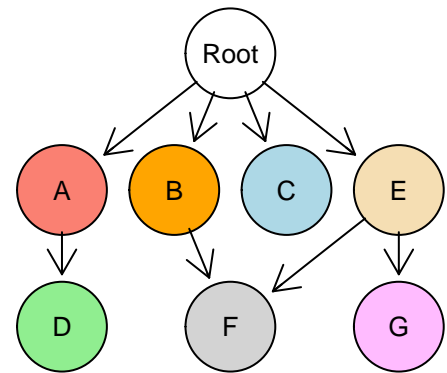

ID **ryICF10Z10RhI71ONm**  
 acc genotypes **48**  
 peaks no back **1**  
 removed edges **0**  
 prop rem edges **0**

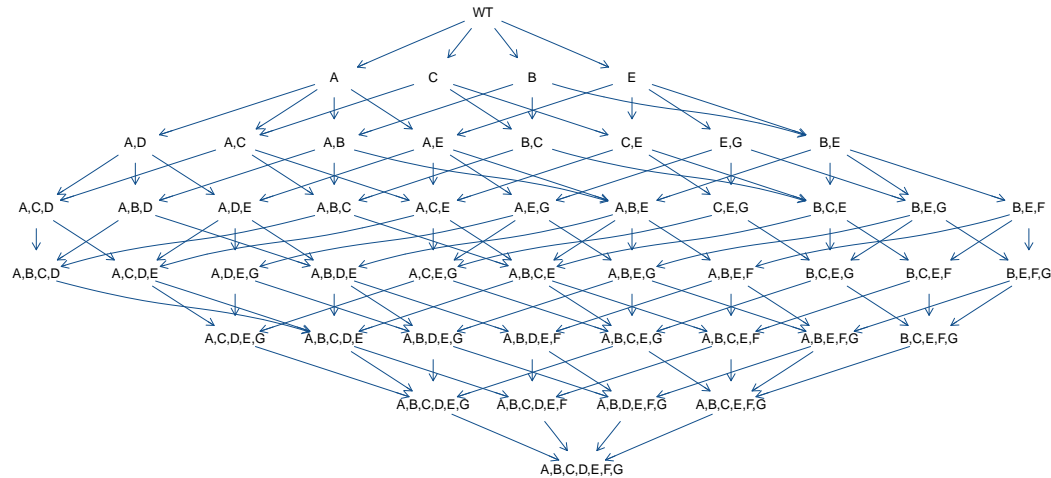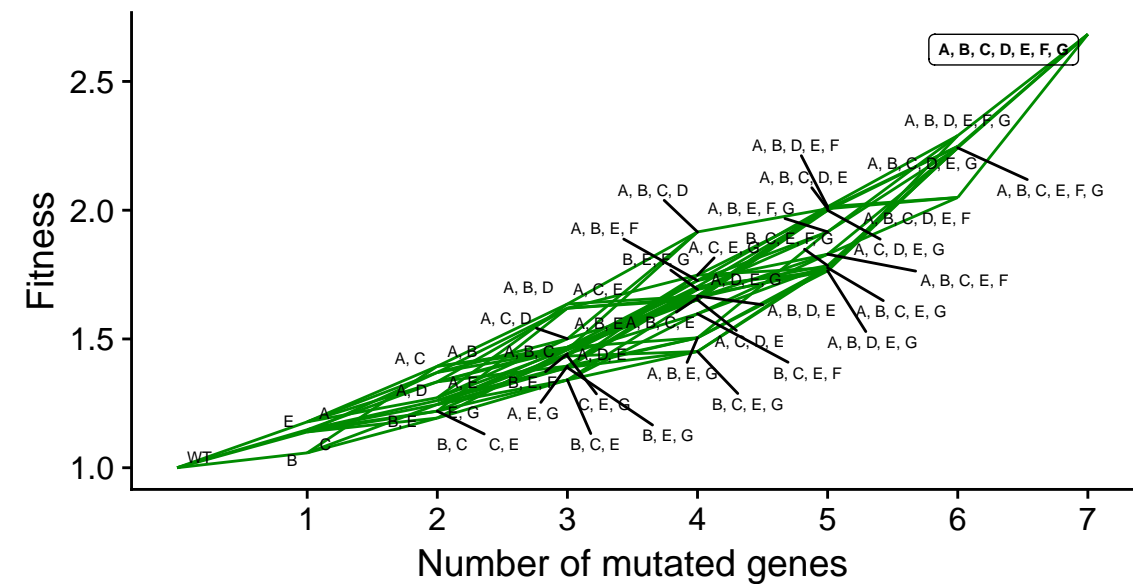

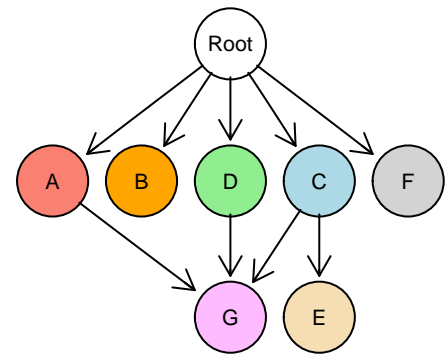

ID **s6QENCe4O6bJtquJ**  
 acc genotypes **56**  
 peaks no back **1**  
 removed edges **0**  
 prop rem edges **0**

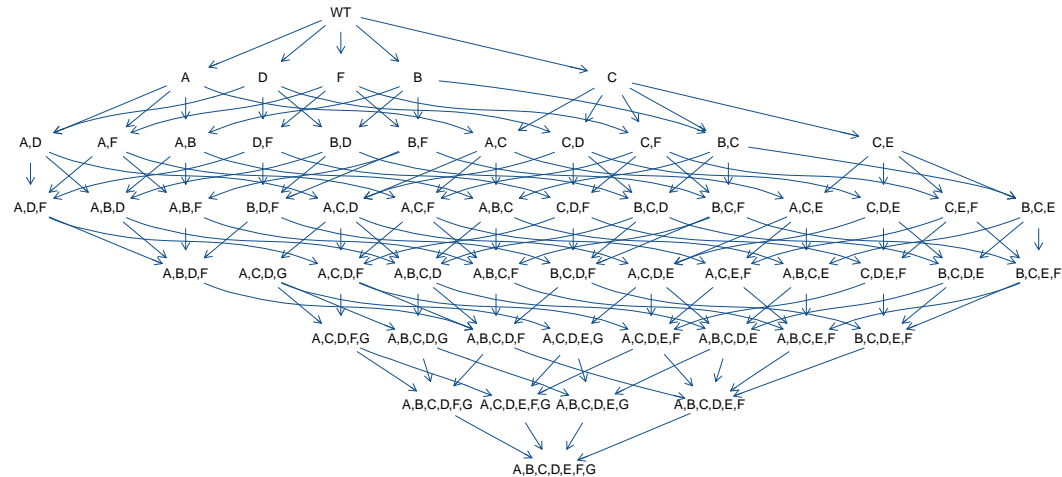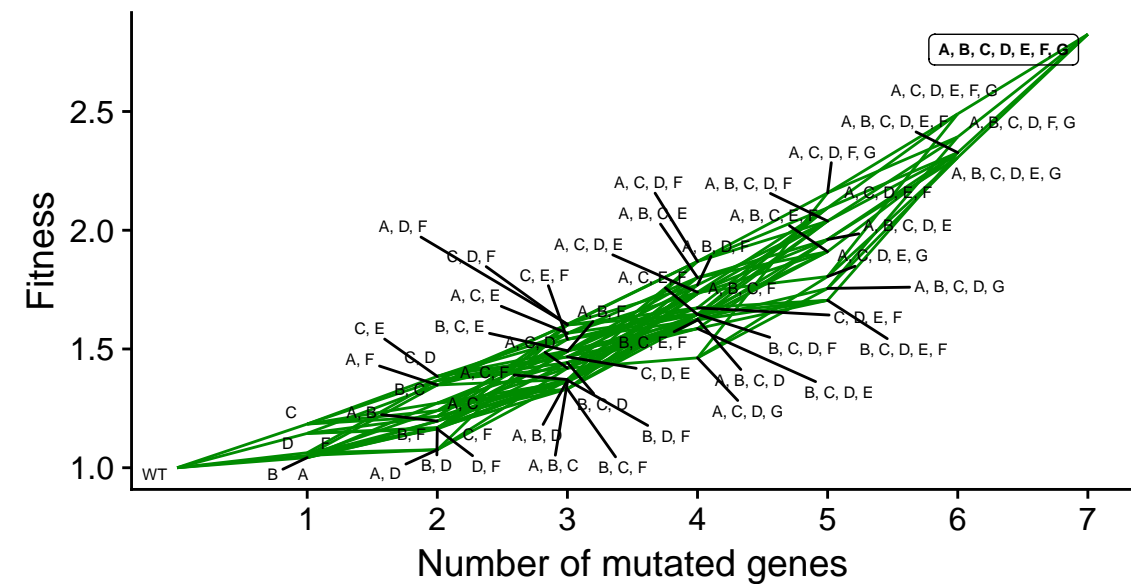

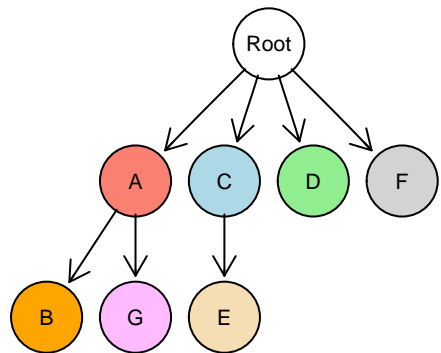

*ID* SeULzsEELisp2JY  
*acc genotypes* 60  
*peaks no back* 1  
*removed edges* 0  
*prop rem edges* 0

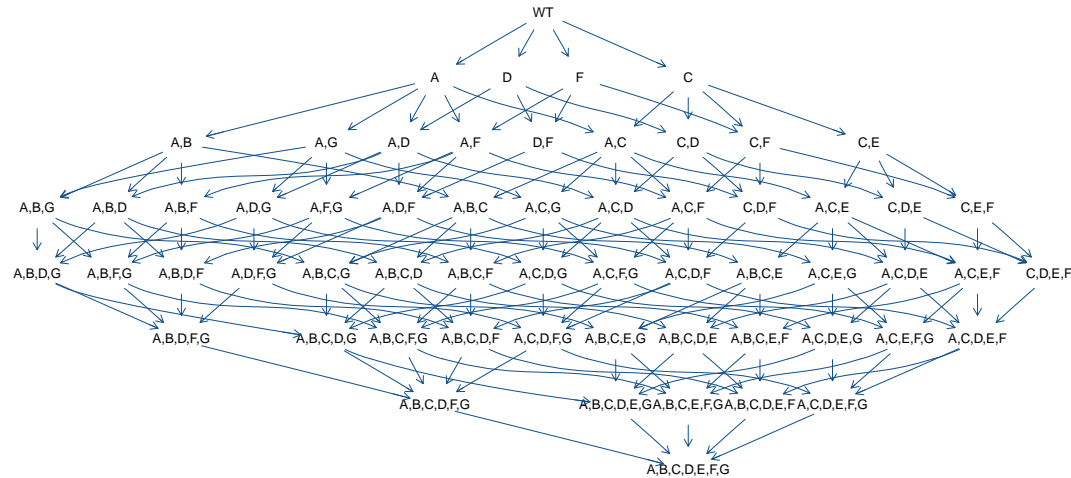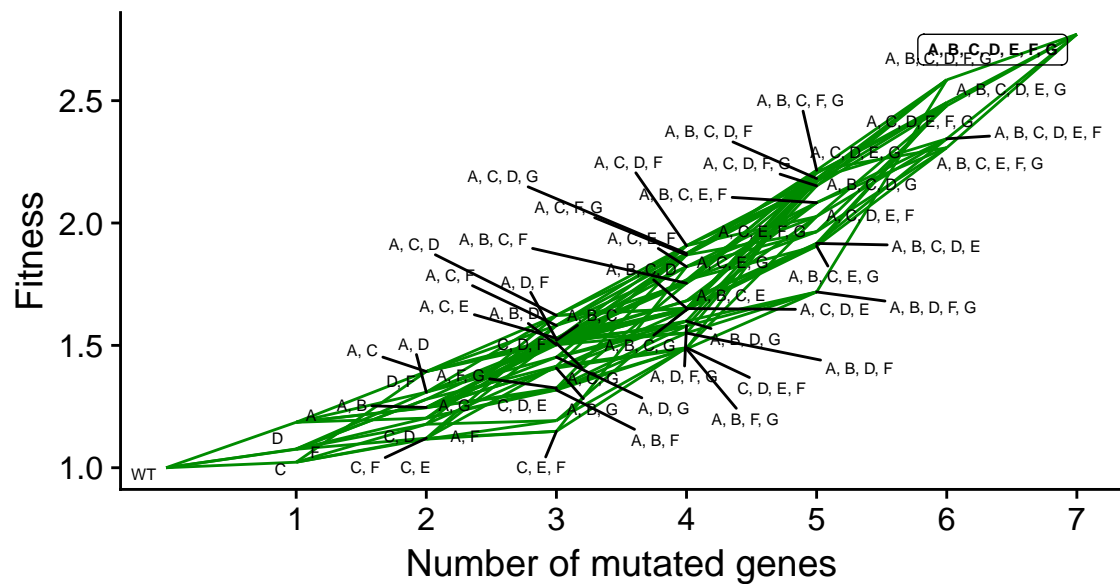





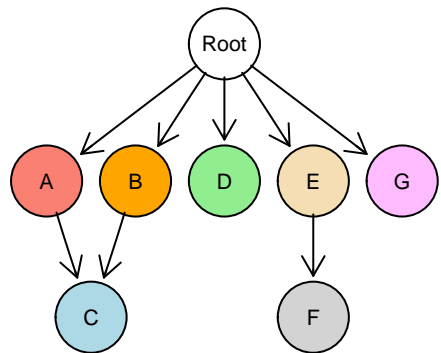

ID SUTWyy1ERdbEqE8j  
 acc genotypes 60  
 peaks no back 1  
 removed edges 0  
 prop rem edges 0

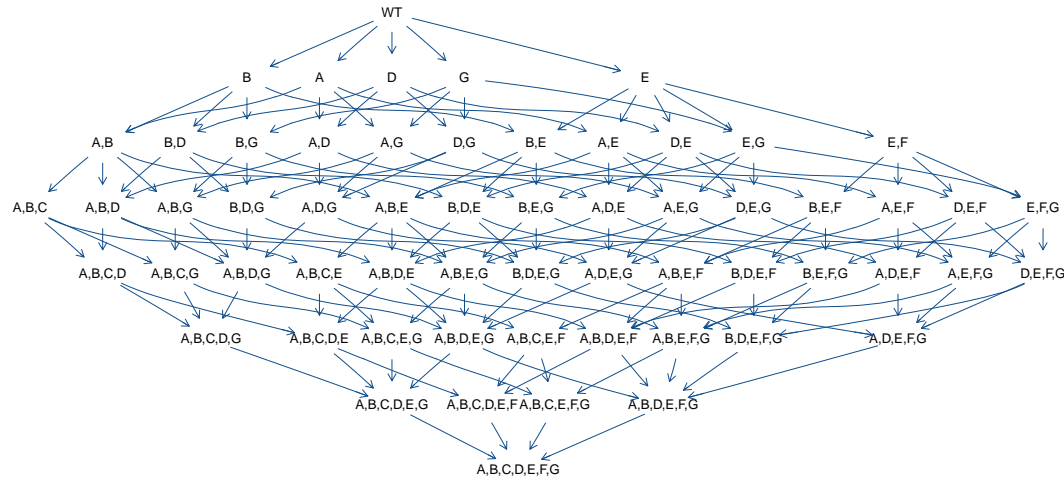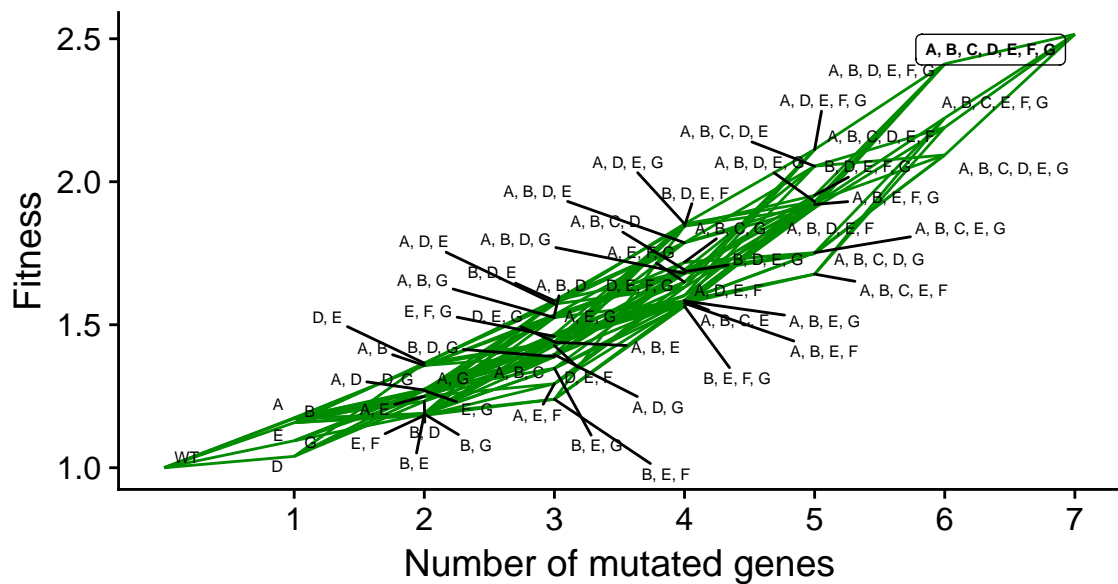

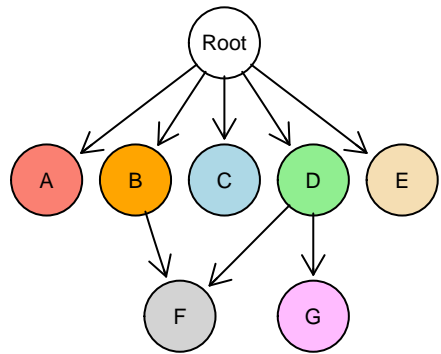

ID **TEOeR5kKW73StsGe**  
 acc genotypes **64**  
 peaks no back **1**  
 removed edges **0**  
 prop rem edges **0**

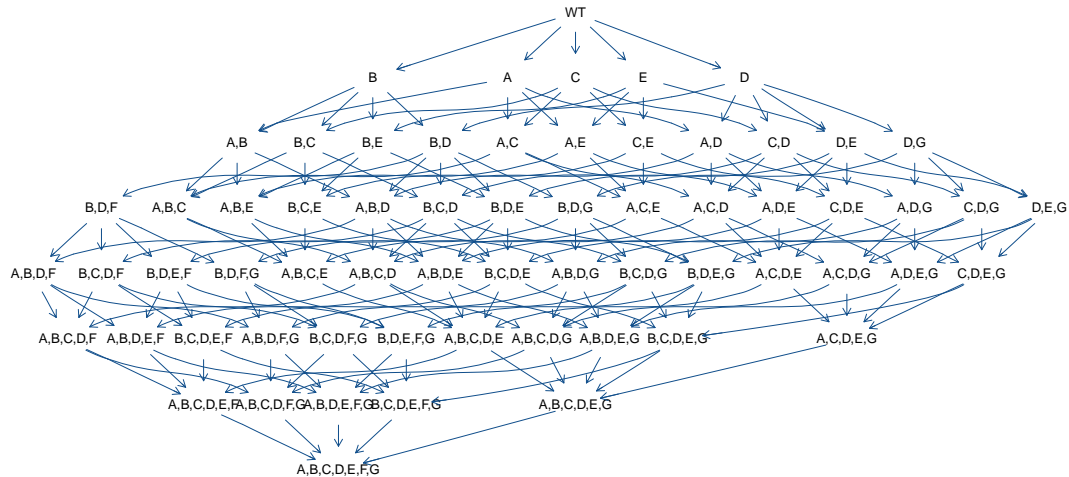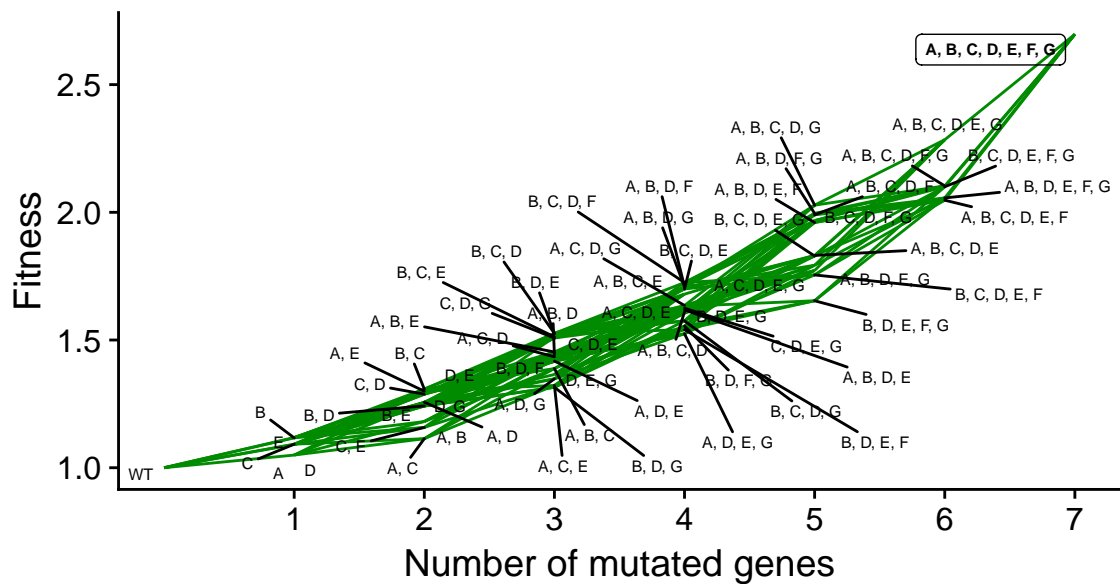

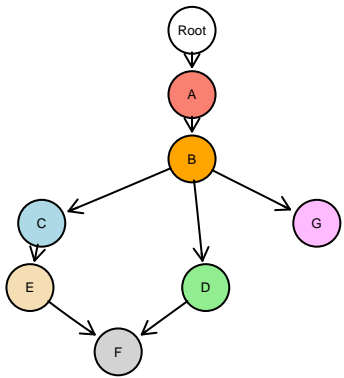

*ID* TqrLOOQde8L7IZjK  
*acc genotypes* 16  
*peaks no back* 1  
*removed edges* 0  
*prop rem edges* 0

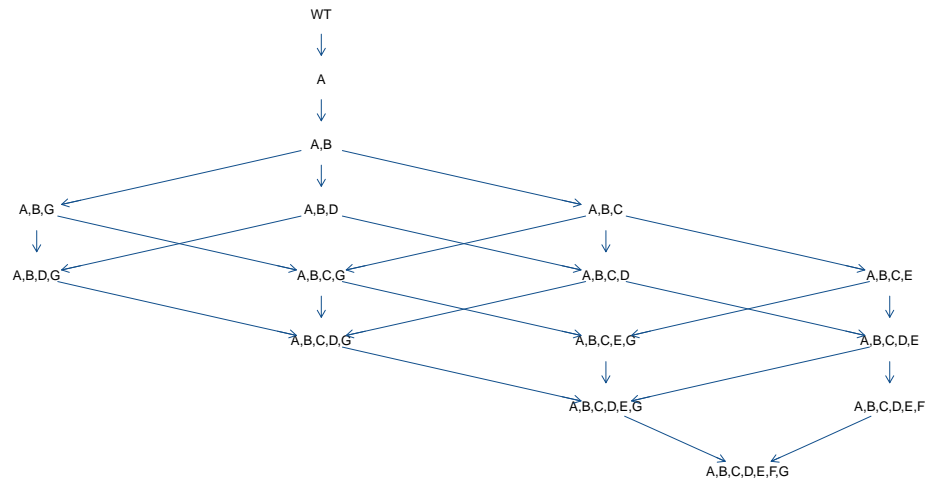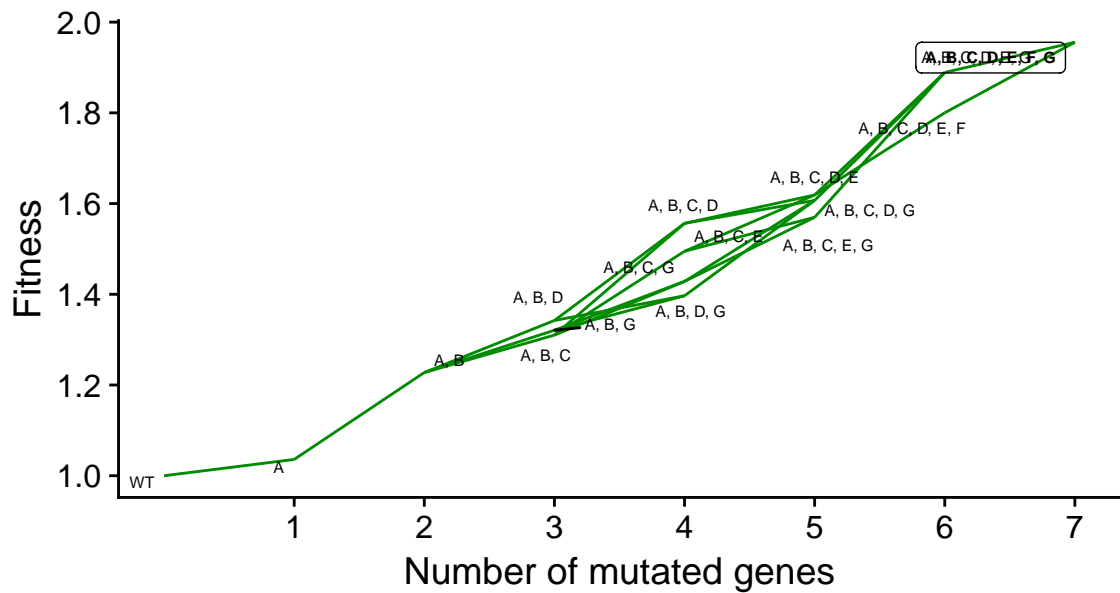

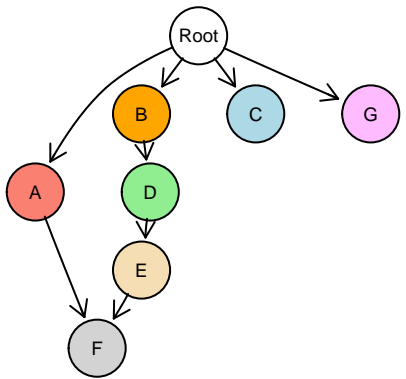

ID **tRehYFGQCicbWhJZ**  
 acc genotypes **36**  
 peaks no back **1**  
 removed edges **0**  
 prop rem edges **0**

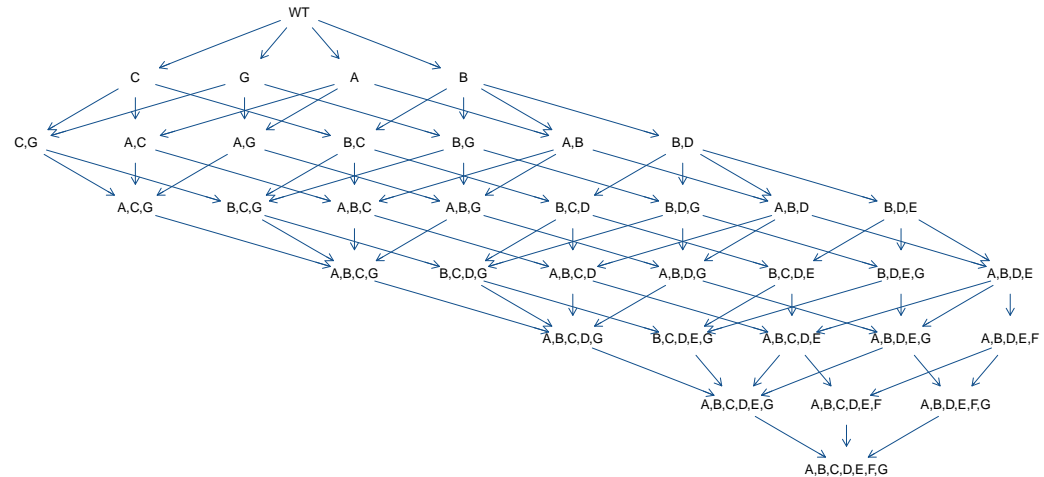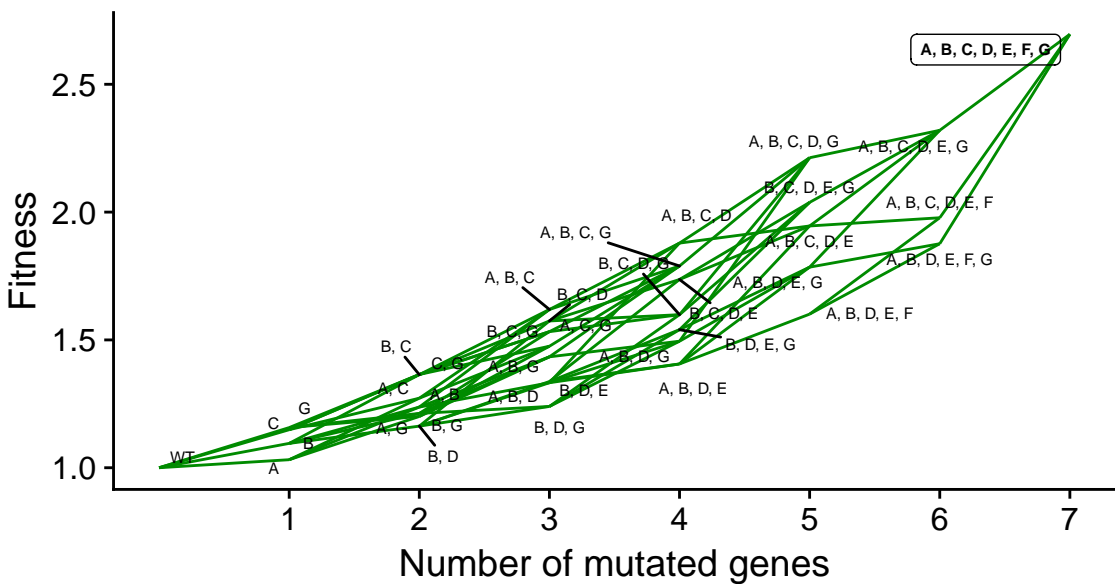

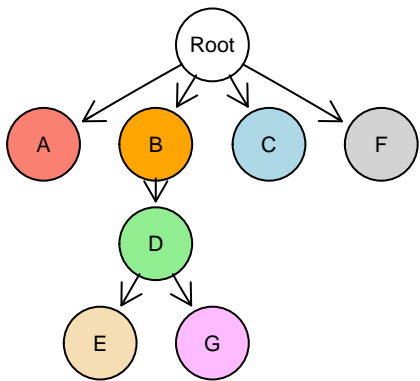

ID TX10Vap1TpO185dpx  
 acc genotypes 48  
 peaks no back 1  
 removed edges 0  
 prop rem edges 0

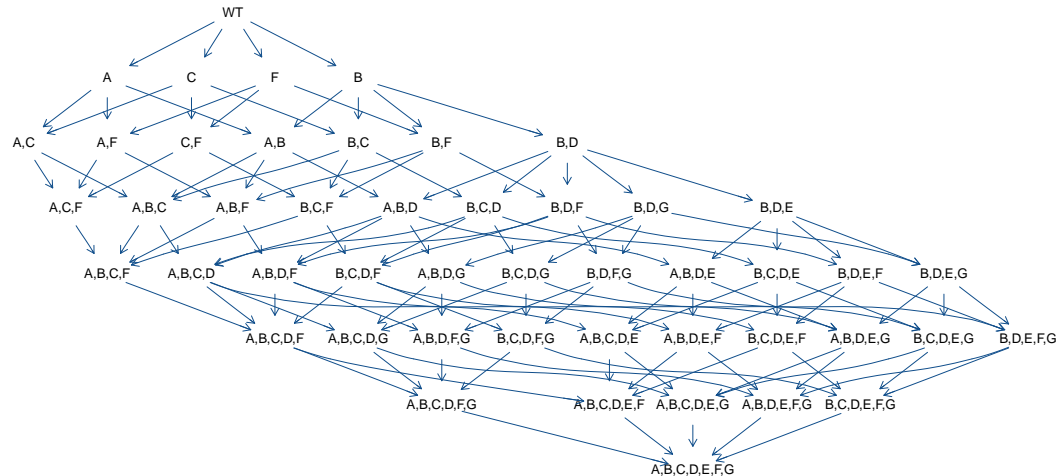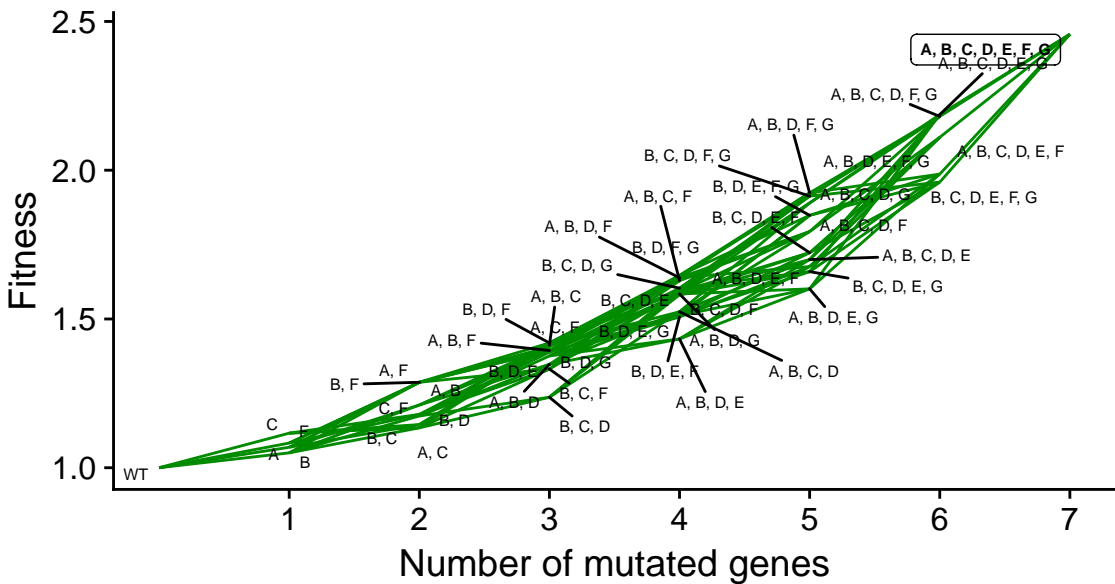



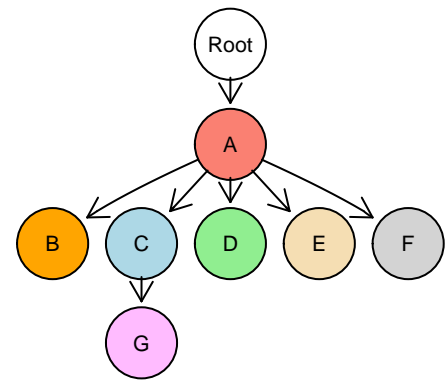

*ID* TZvpRpDnbfQvlt4G  
*acc genotypes* 49  
*peaks no back* 1  
*removed edges* 0  
*prop rem edges* 0

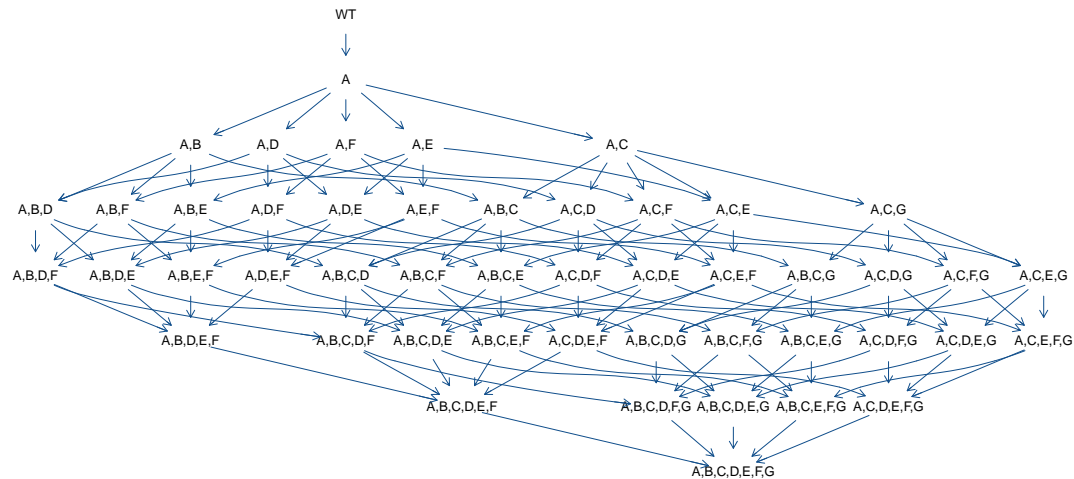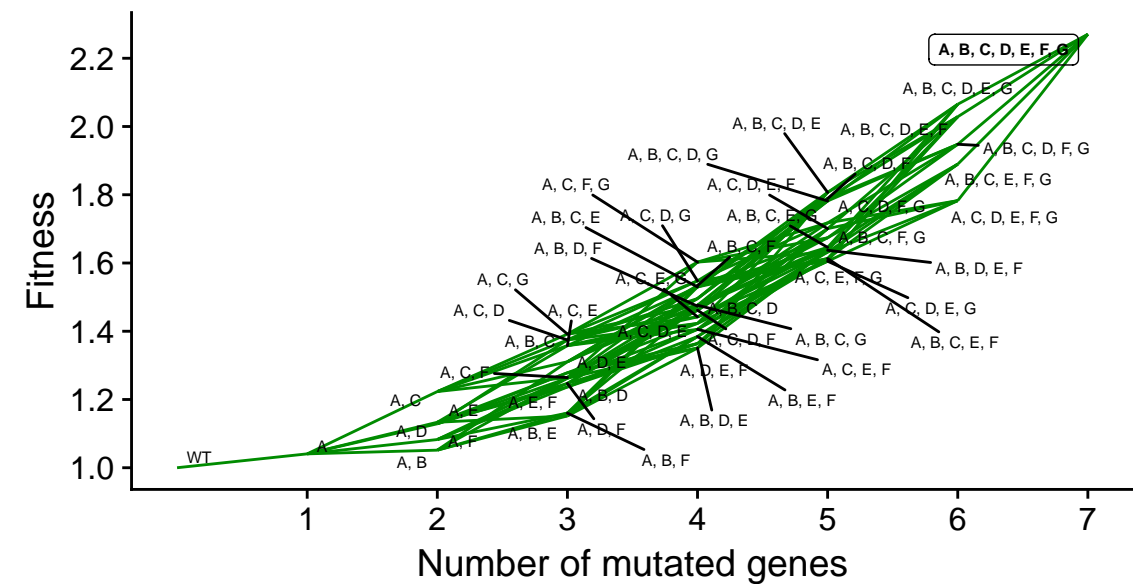



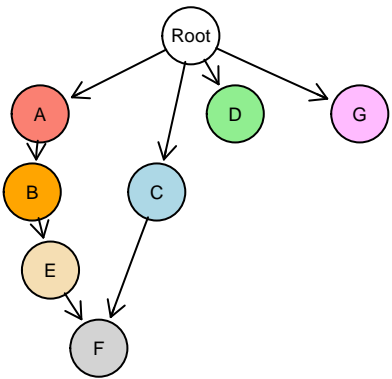

ID **U9FVYqSn82tFhAtI**  
 acc genotypes **36**  
 peaks no back 1  
 removed edges 0  
 prop rem edges 0

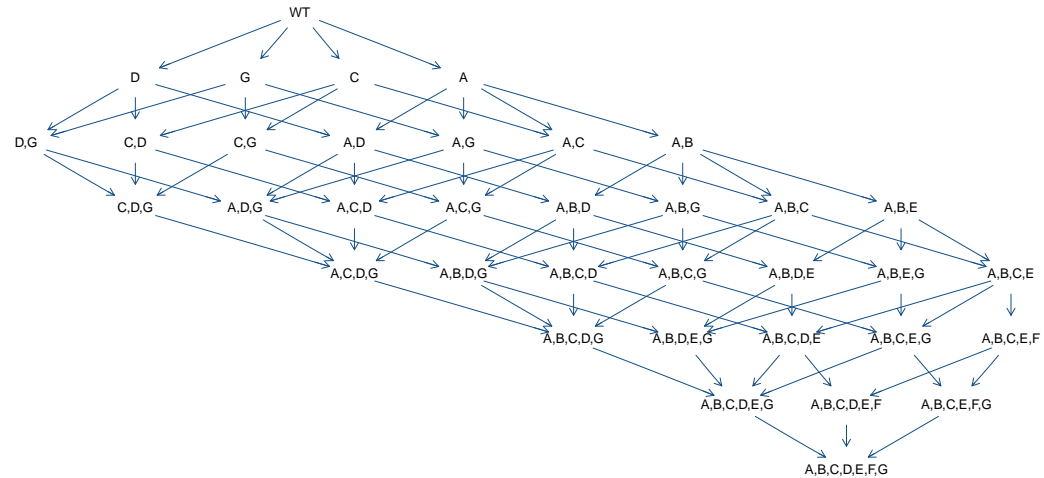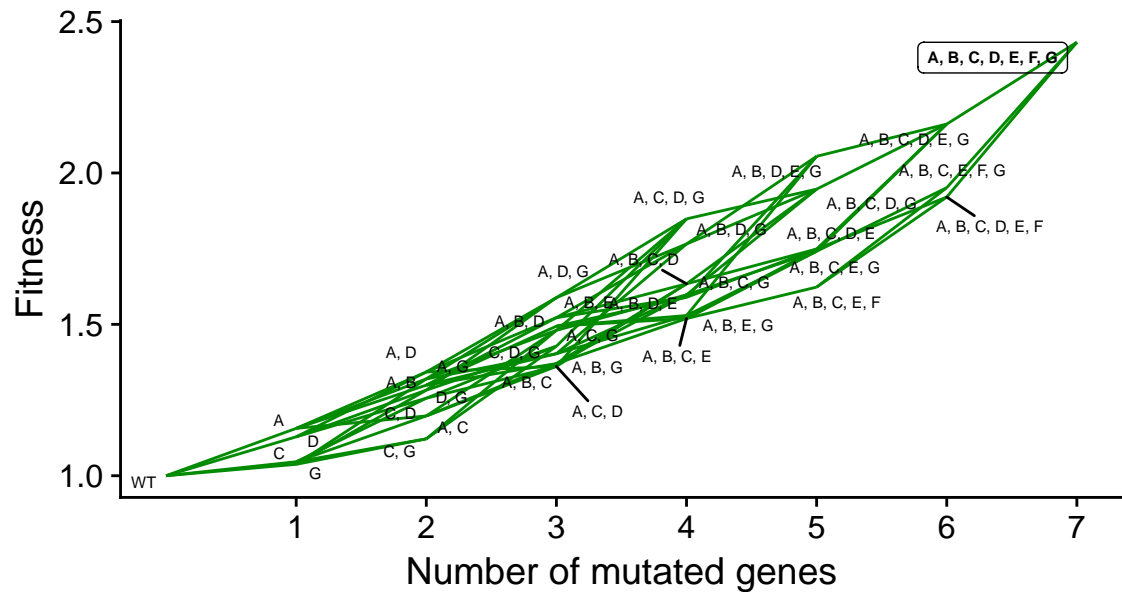

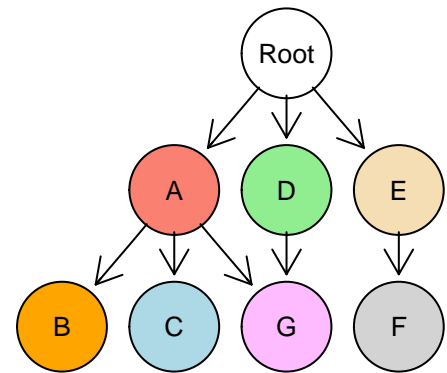

ID [U9tqKXHuH1LkO5mF](#)  
 acc genotypes 42  
 peaks no back 1  
 removed edges 0  
 prop rem edges 0

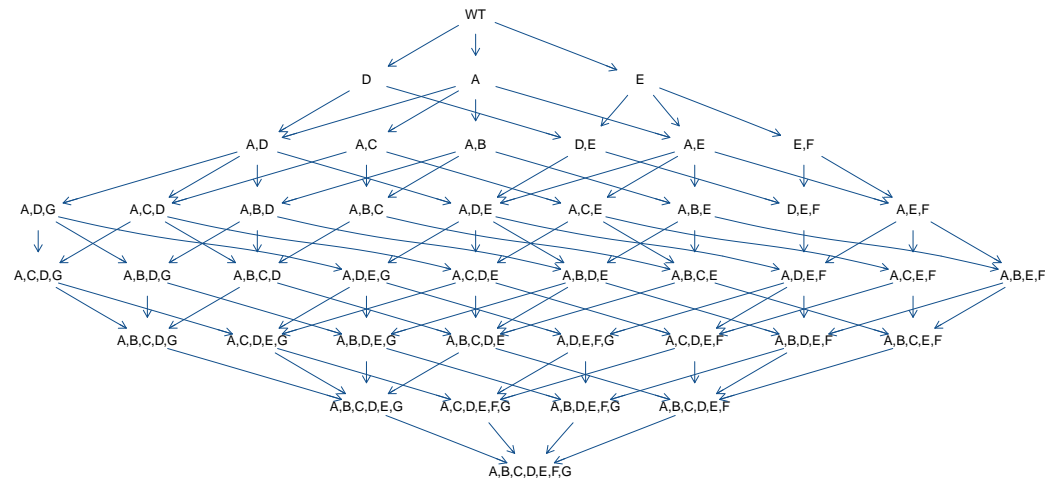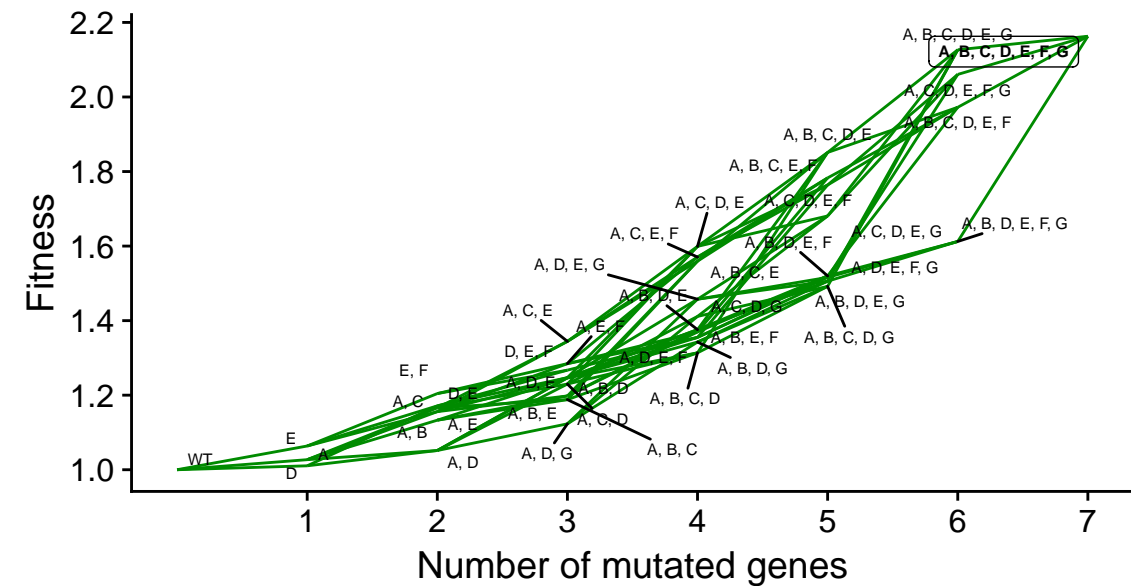

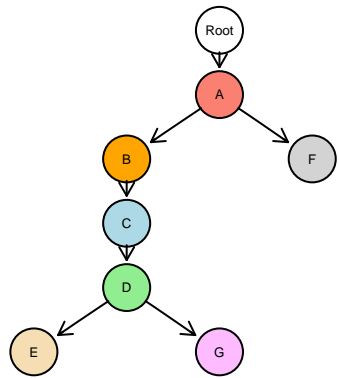

ID **Ua2QSISPNSRgJaJY**  
 acc genotypes **15**  
 peaks no back **1**  
 removed edges **0**  
 prop rem edges **0**

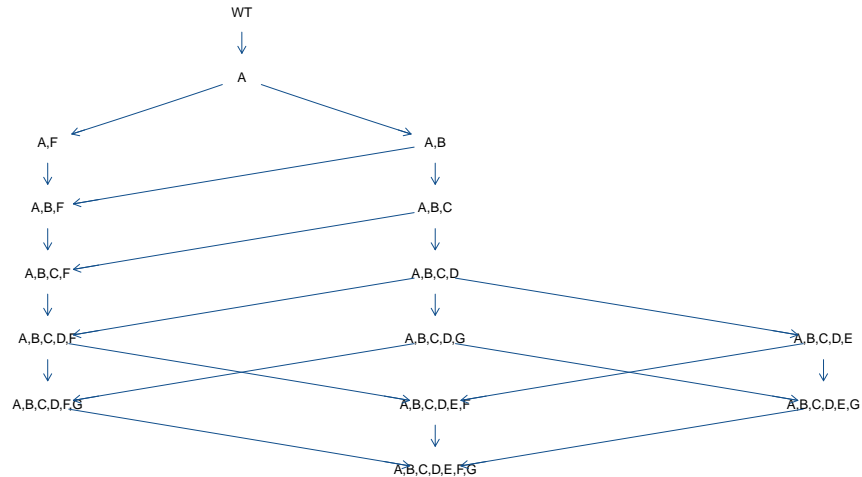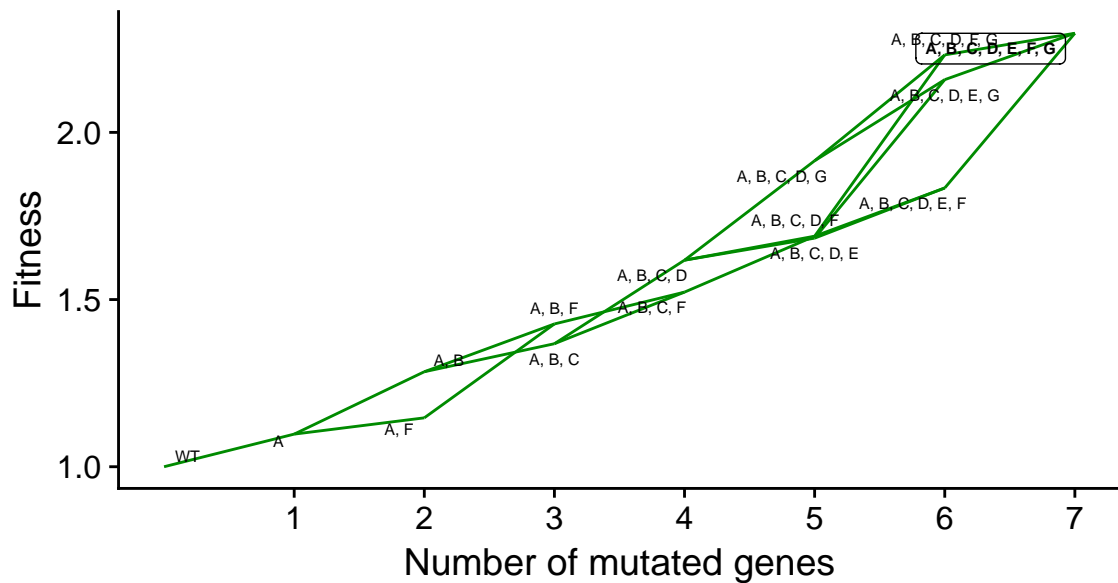

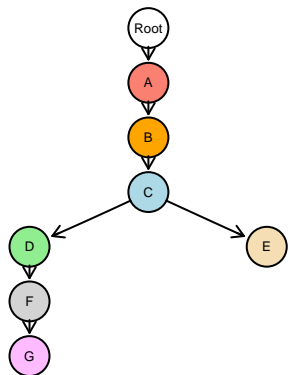

ID **UDkNV5Dxa4w10lh6h**  
 acc genotypes **11**  
 peaks no back **1**  
 removed edges **0**  
 prop rem edges **0**

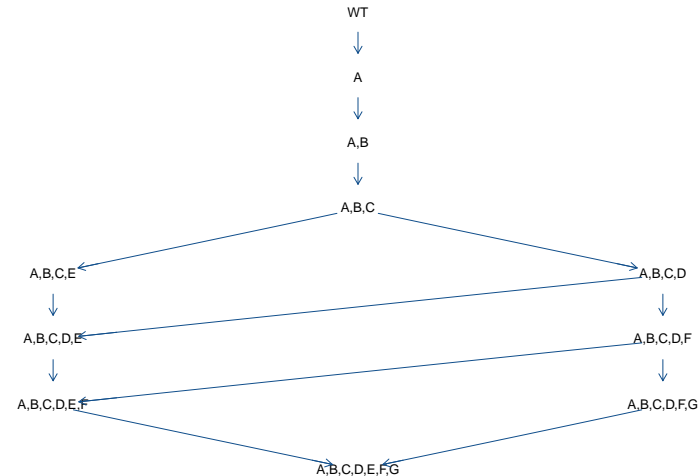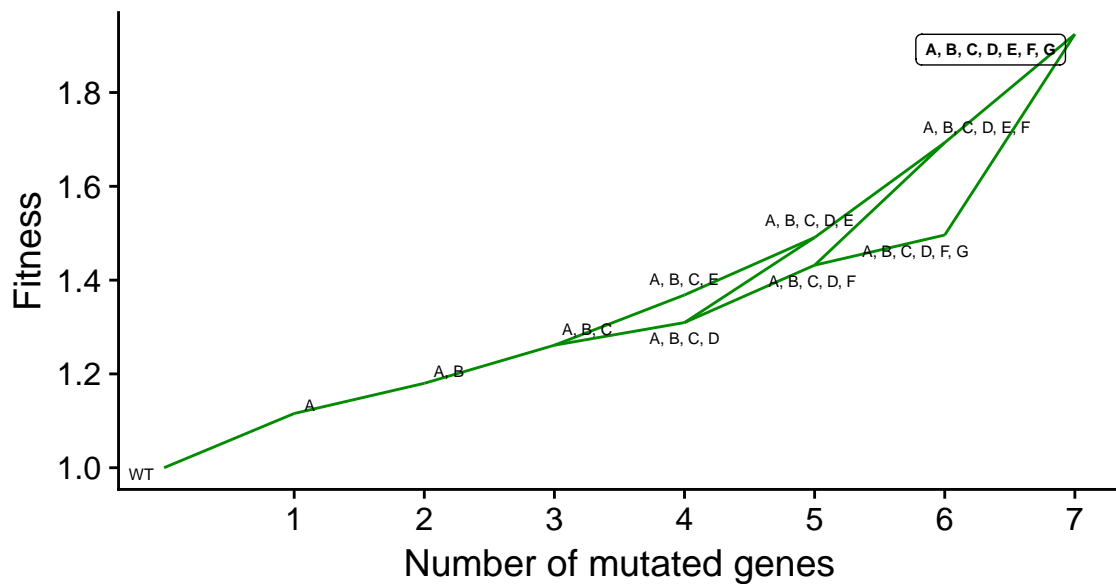

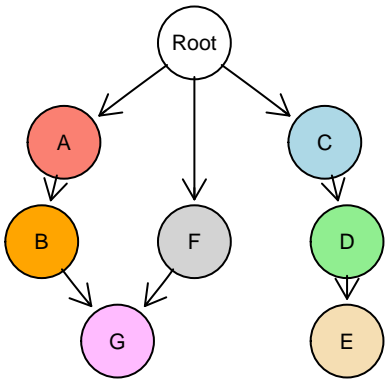

*ID* uggyrwXSaWaMkYSi  
*acc genotypes* 28  
*peaks no back* 1  
*removed edges* 0  
*prop rem edges* 0

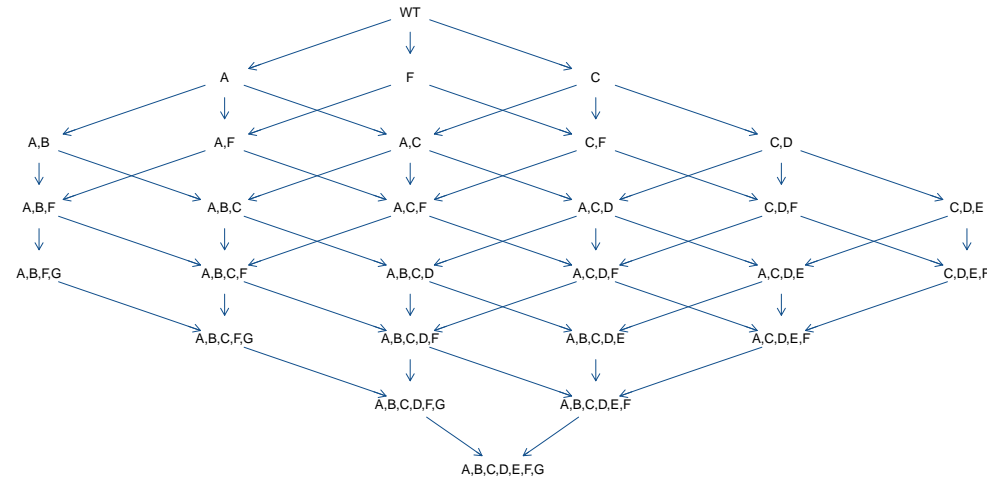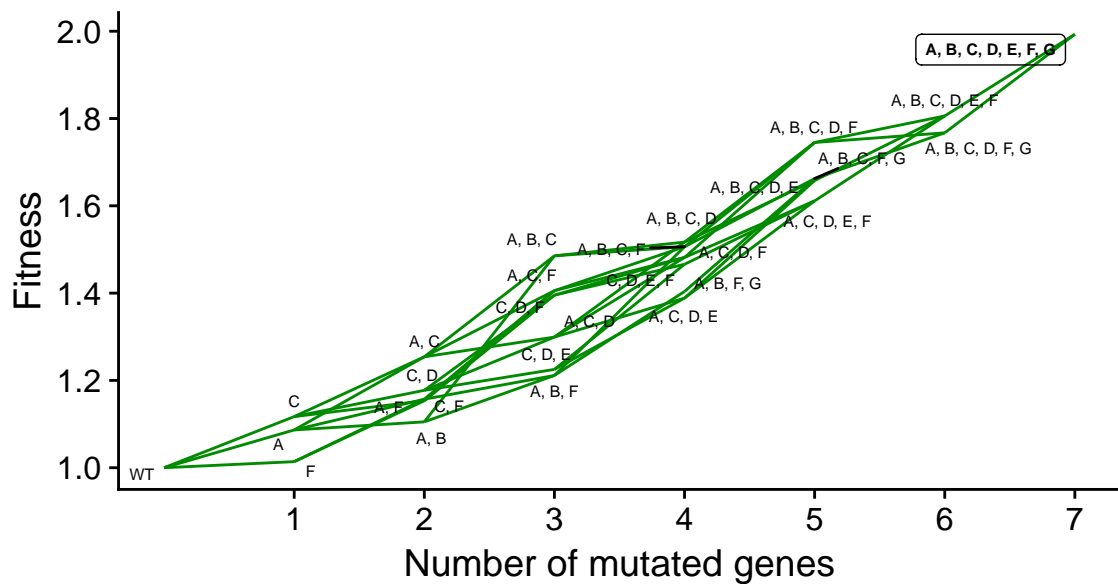



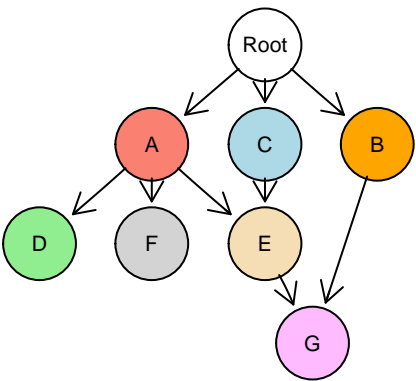

*ID* uvOx4rGT8Tr6iHvm  
*acc genotypes* 32  
*peaks no back* 1  
*removed edges* 0  
*prop rem edges* 0

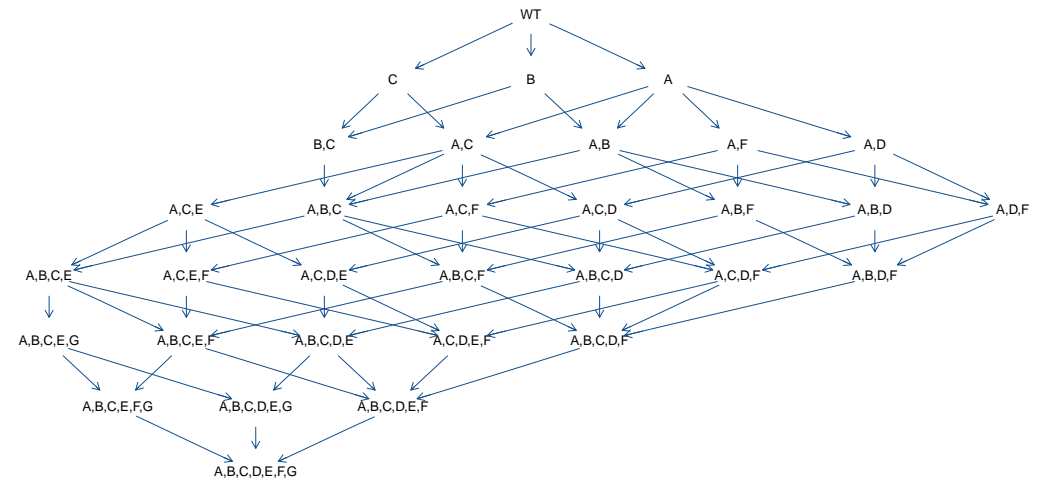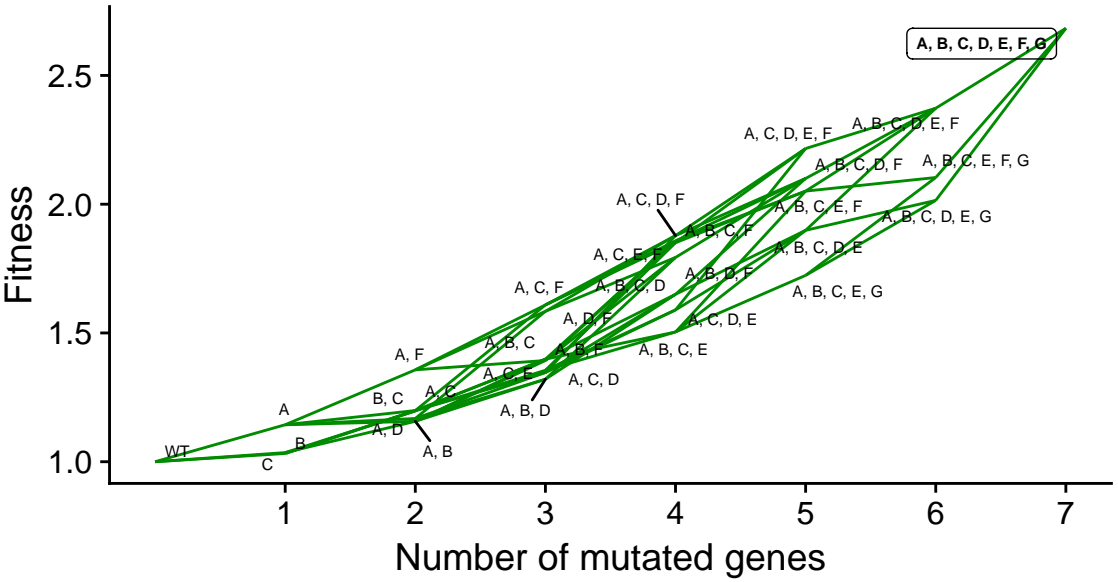

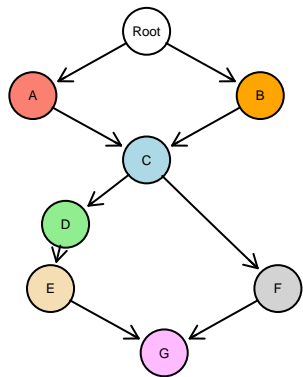

ID [uW1bRozHBgg4IHvp](#)  
 acc genotypes **11**  
 peaks no back 1  
 removed edges 0  
 prop rem edges 0

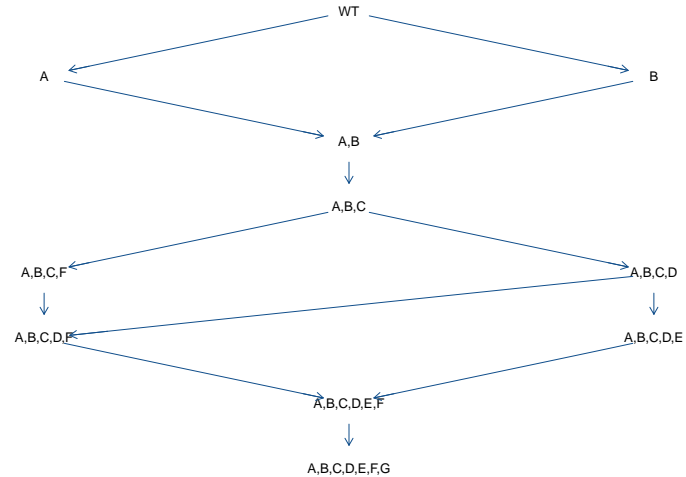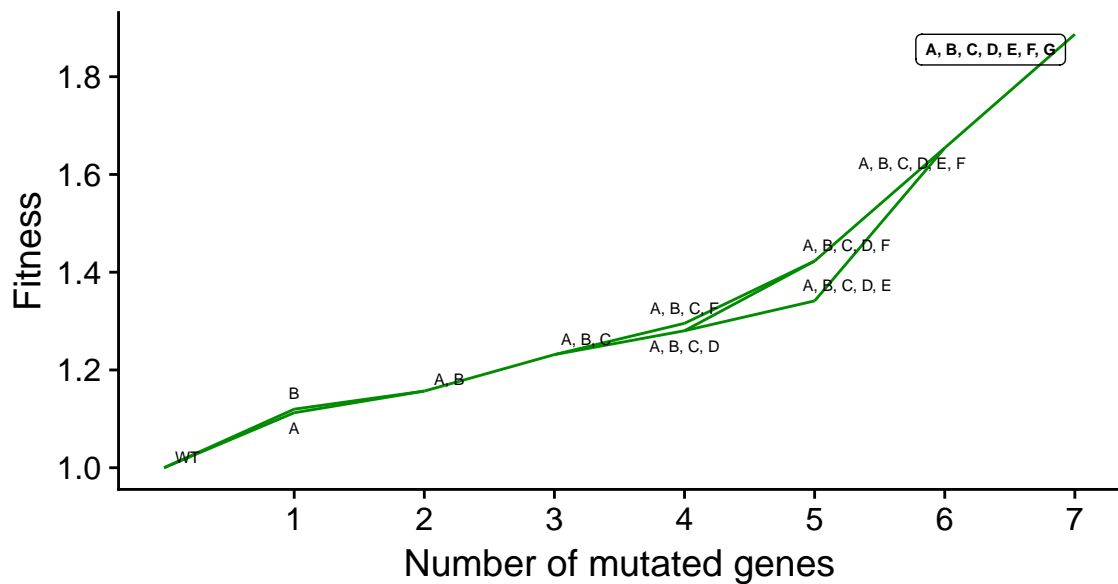



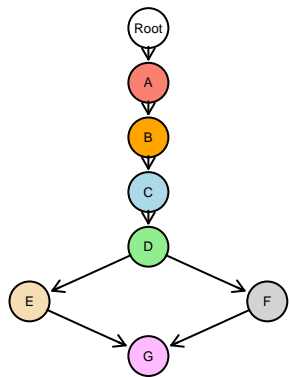

ID [uXxo7pBZA0c10w5w3](#)  
 acc genotypes 9  
 peaks no back 1  
 removed edges 0  
 prop rem edges 0

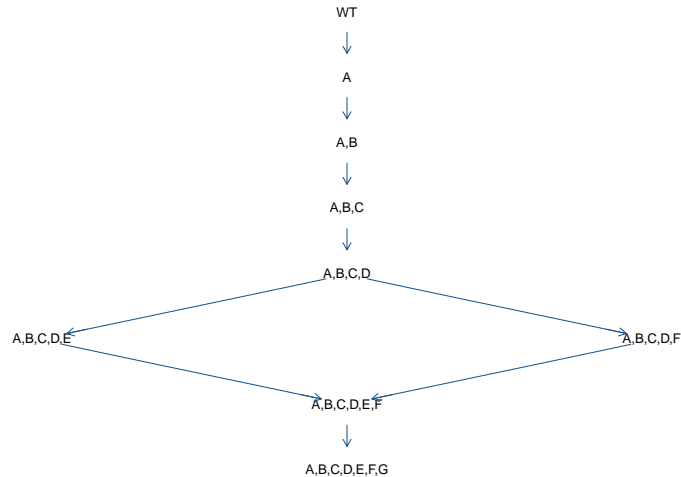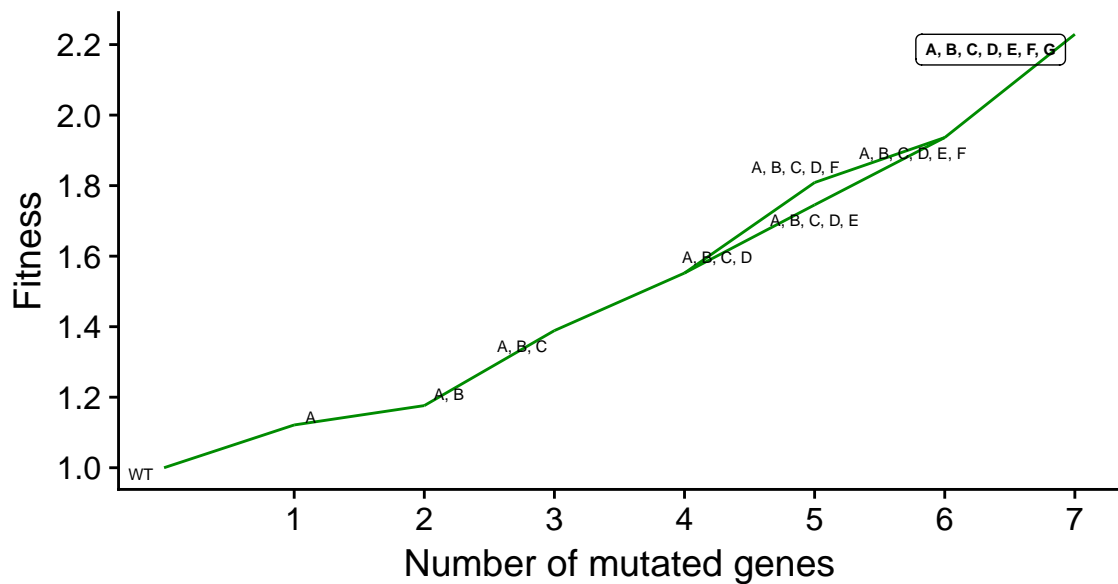

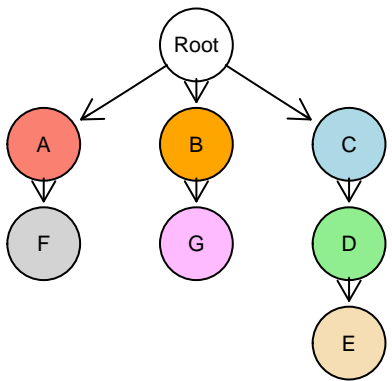

*ID* vG10cQRZVOxdasUPn  
*acc genotypes* 36  
*peaks no back* 1  
*removed edges* 0  
*prop rem edges* 0

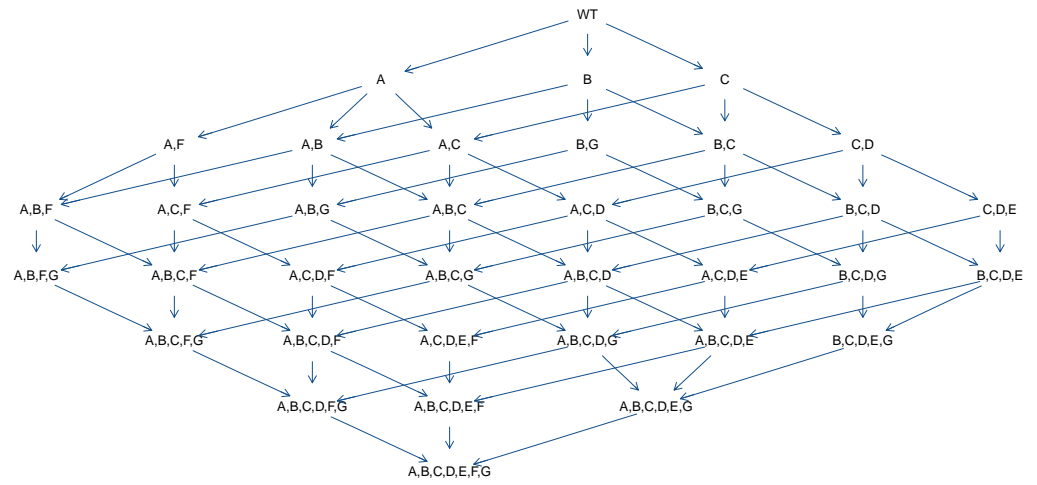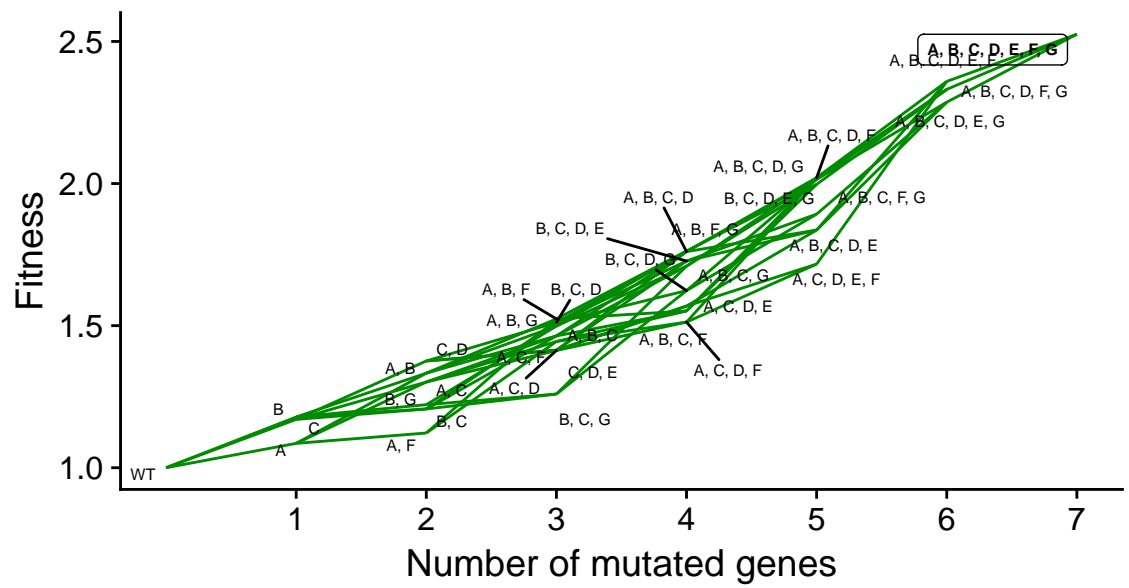

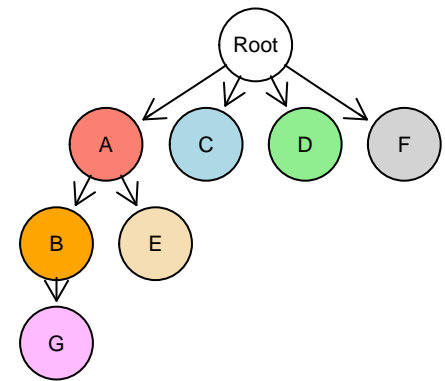

ID **vpP1t7lvrEU3dpj1**  
 acc genotypes **56**  
 peaks no back **1**  
 removed edges **0**  
 prop rem edges **0**

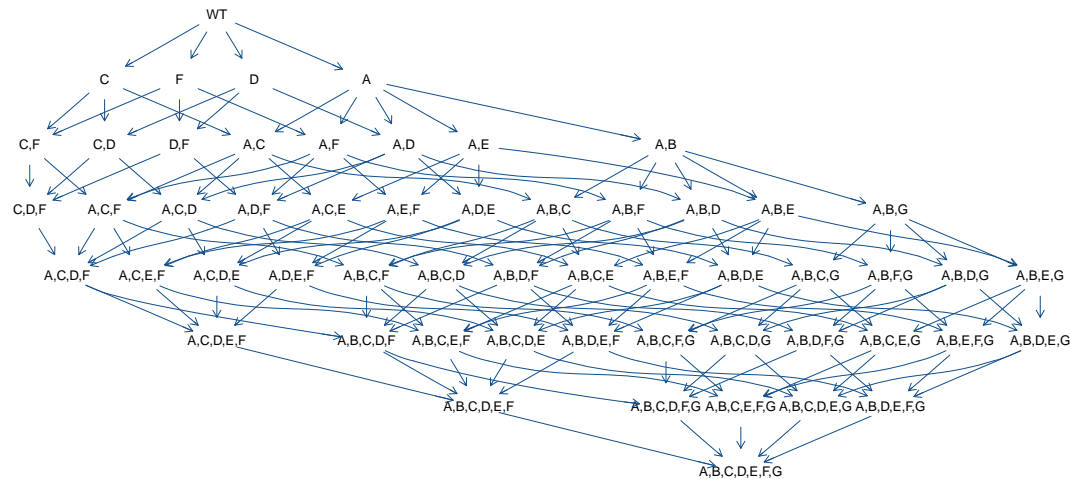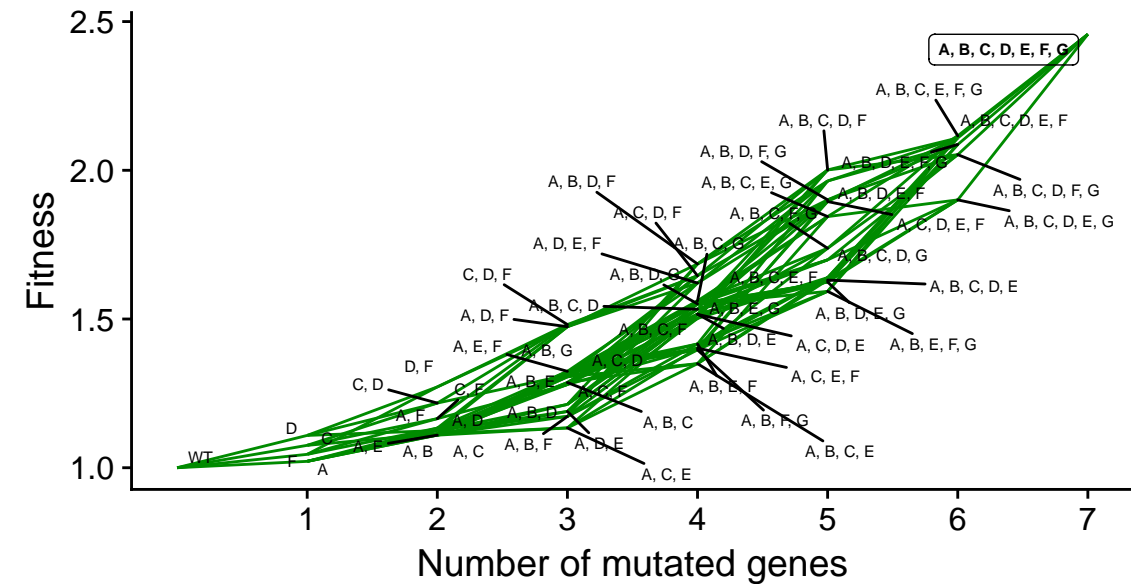

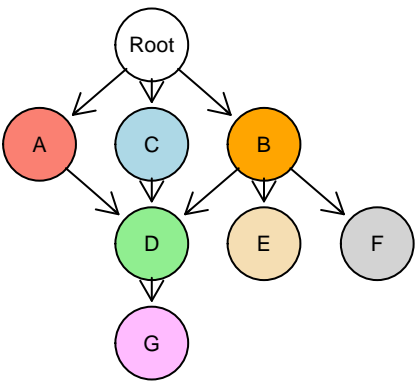

ID **vq10rX5oSabdGhDLE**  
 acc genotypes **28**  
 peaks no back **1**  
 removed edges **0**  
 prop rem edges **0**

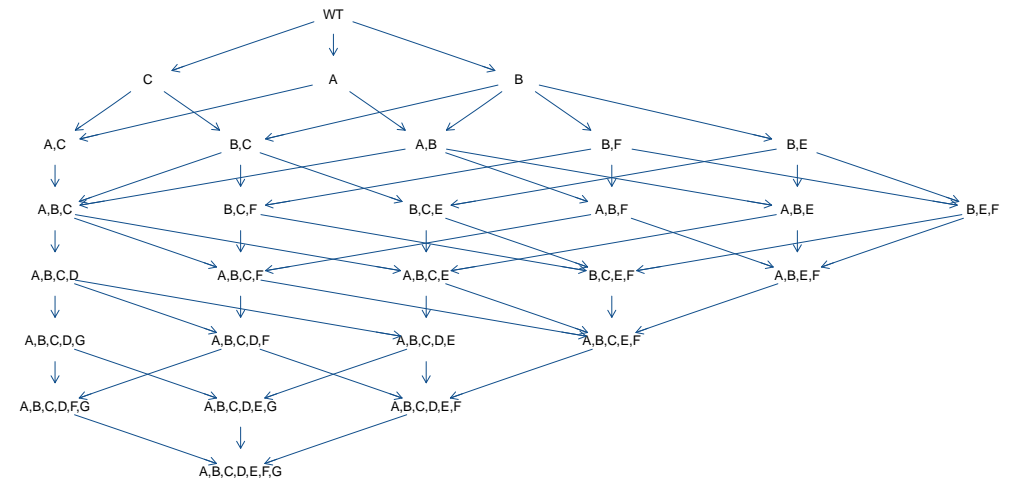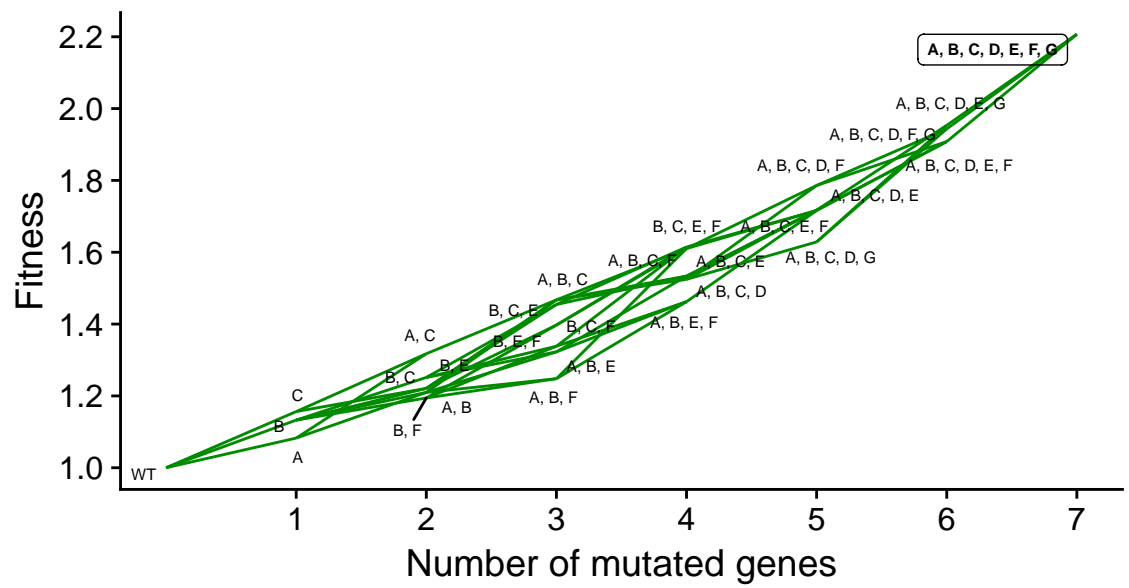

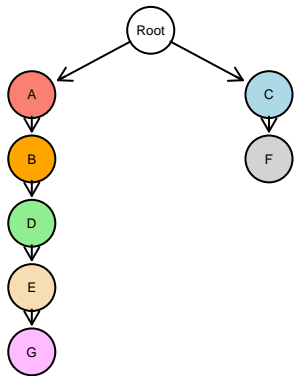

ID **vrlakeKZSaVC1Lzx**  
 acc genotypes **18**  
 peaks no back 1  
 removed edges 0  
 prop rem edges 0

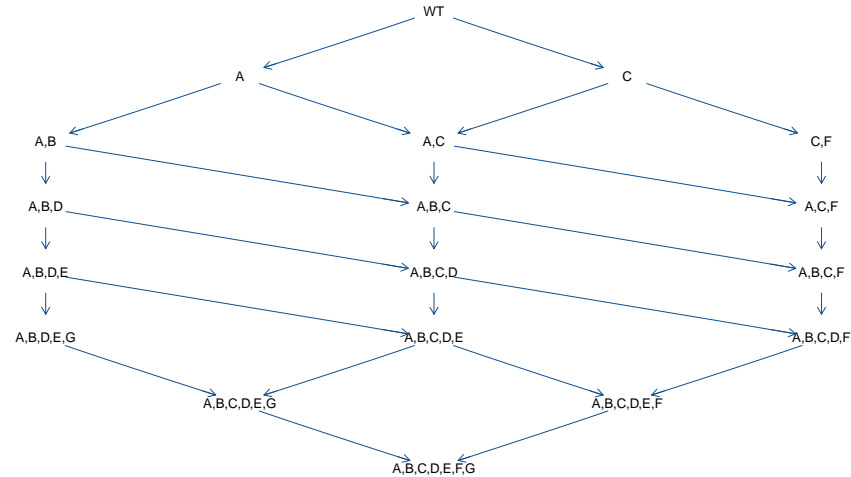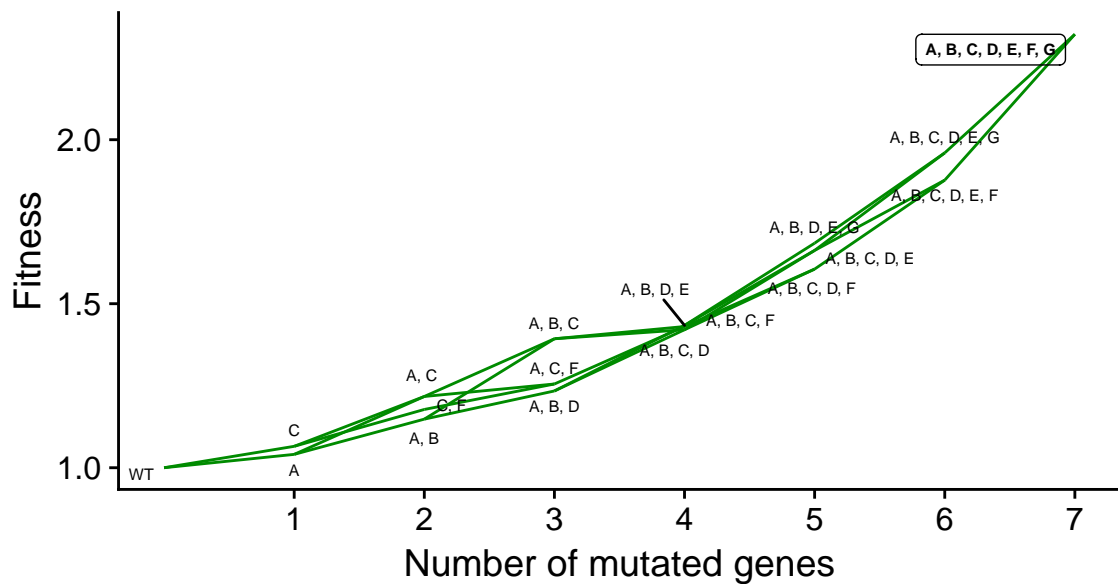

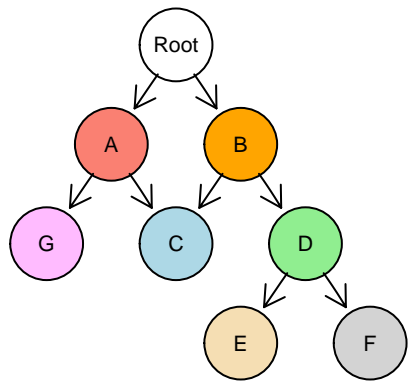

*ID* VYbhtDvalyAvnLsQ  
*acc genotypes* 28  
*peaks no back* 1  
*removed edges* 0  
*prop rem edges* 0

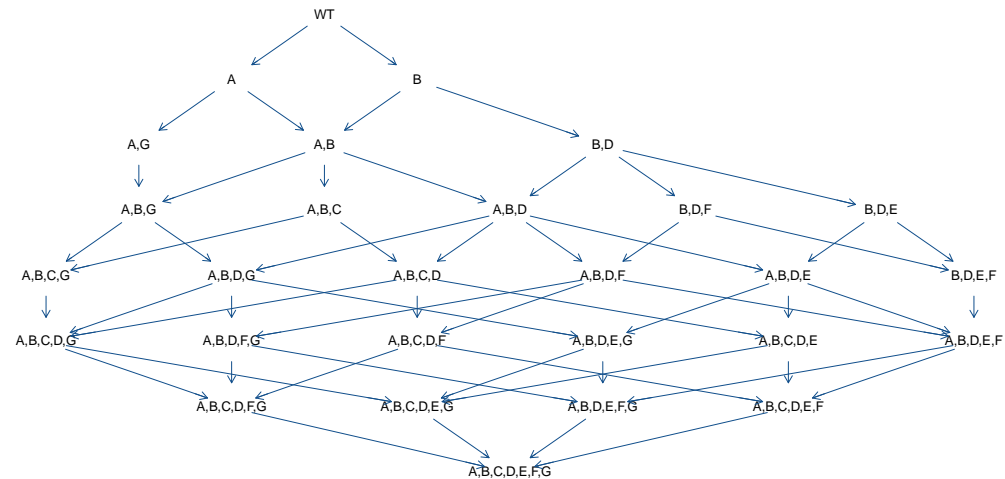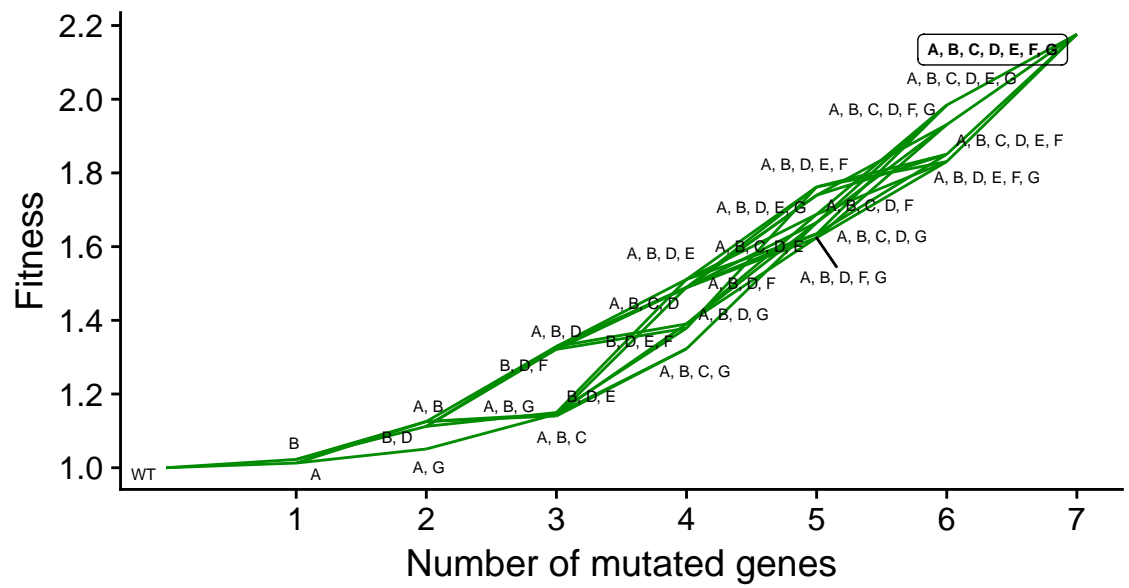

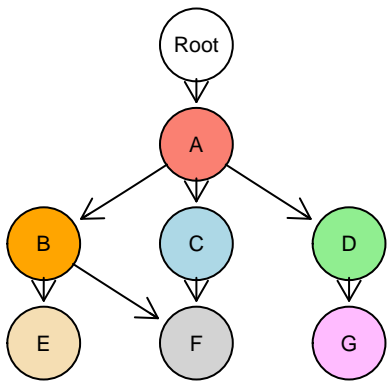

ID **Wc5FDMqc5Bb6oeDH**  
 acc genotypes **25**  
 peaks no back 1  
 removed edges 0  
 prop rem edges 0

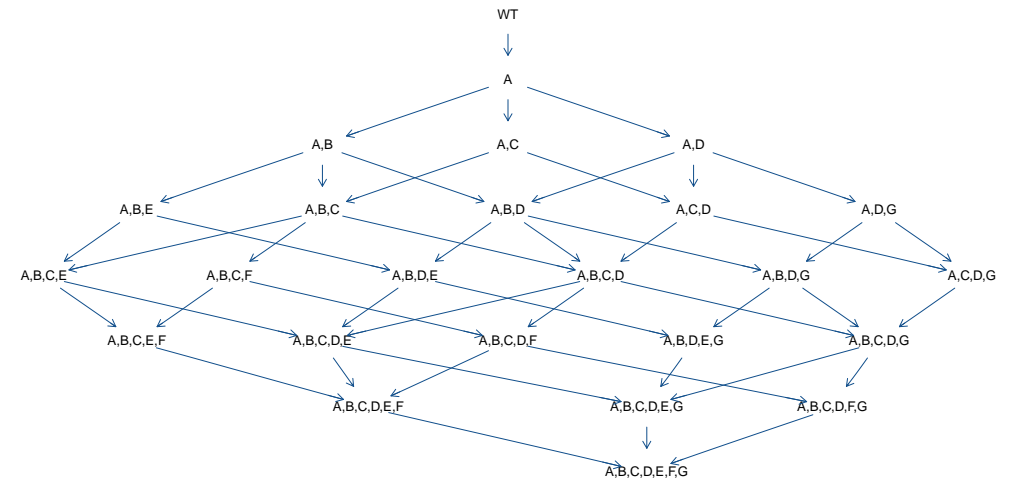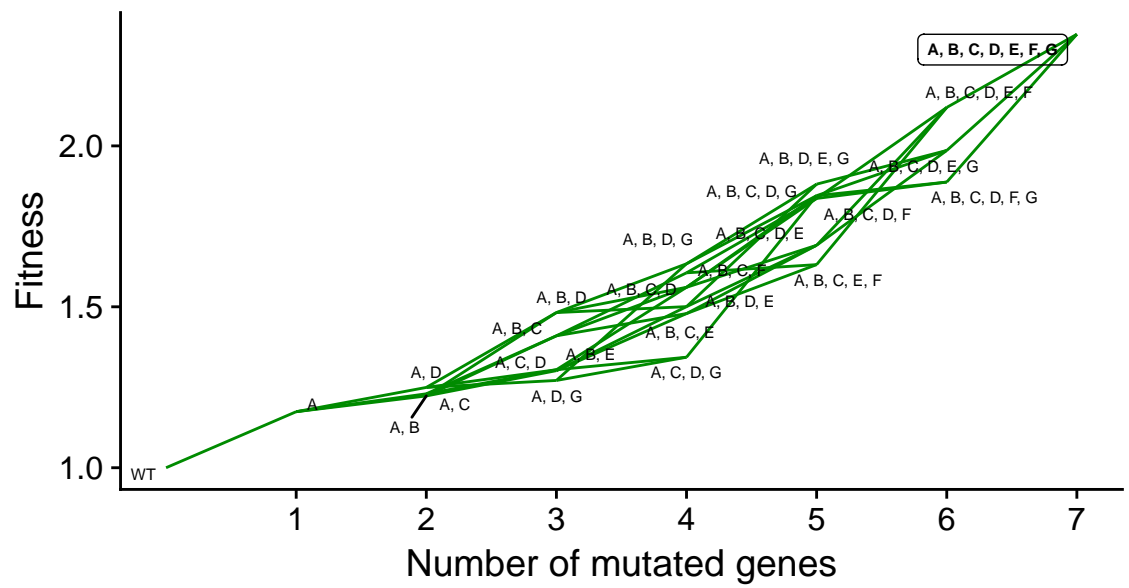

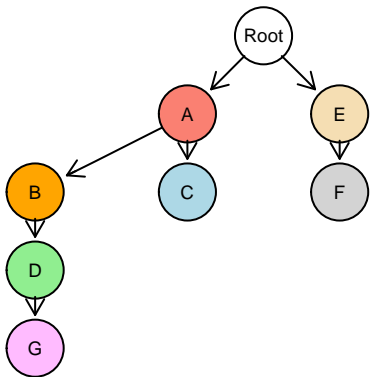

*ID* Wh8iuk15tW3rKboV  
*acc genotypes* 27  
*peaks no back* 1  
*removed edges* 0  
*prop rem edges* 0

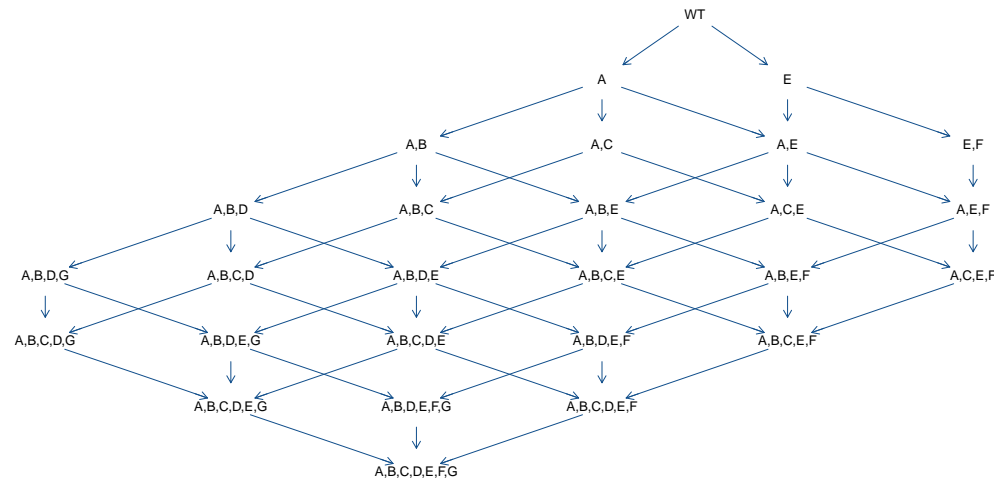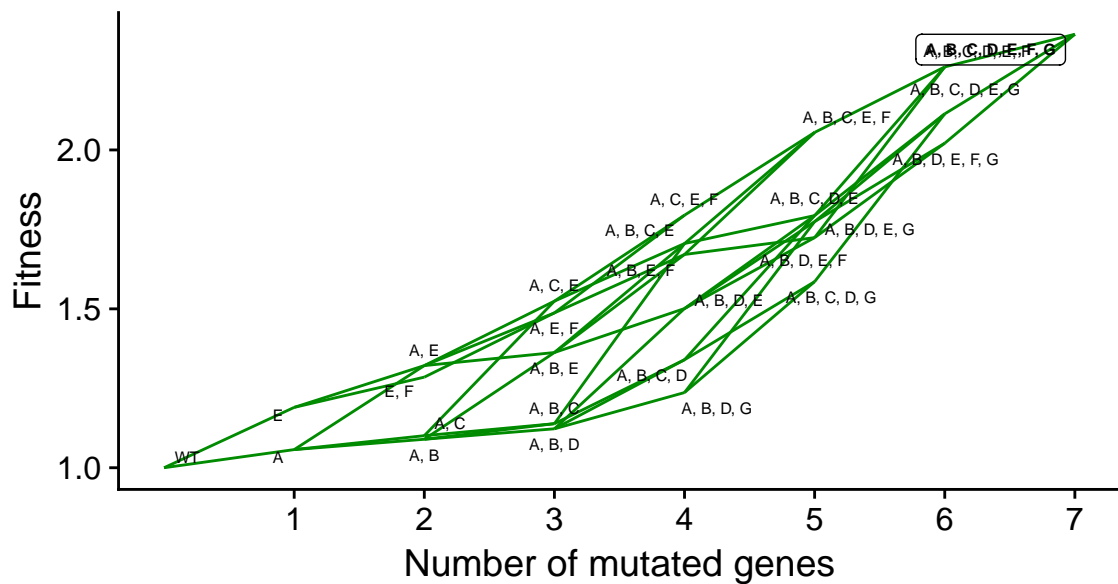



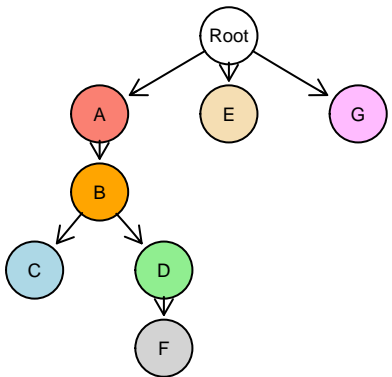

*ID* wKEITkPsWorfdlcX  
*acc genotypes* 32  
*peaks no back* 1  
*removed edges* 0  
*prop rem edges* 0

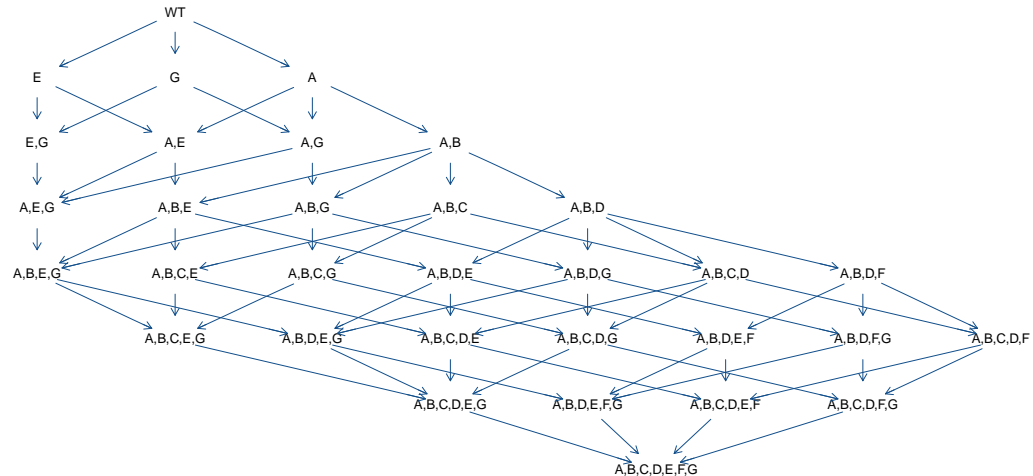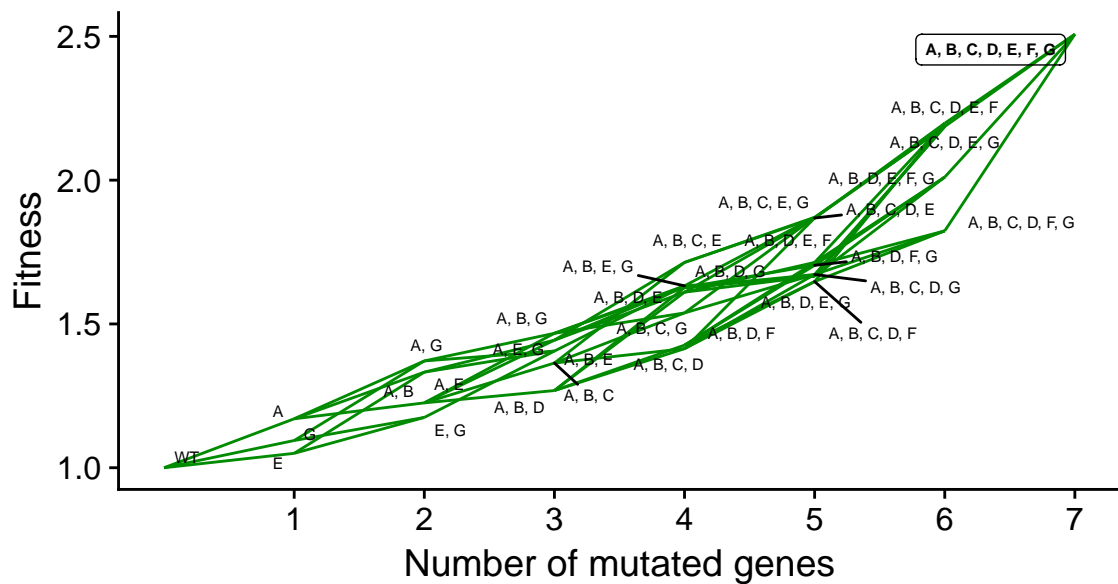

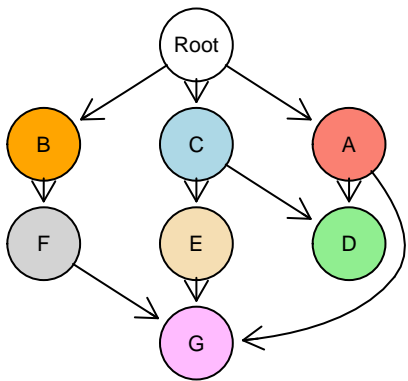

*ID* wLlgb17DLATLHcdE  
*acc genotypes* 26  
*peaks no back* 1  
*removed edges* 0  
*prop rem edges* 0

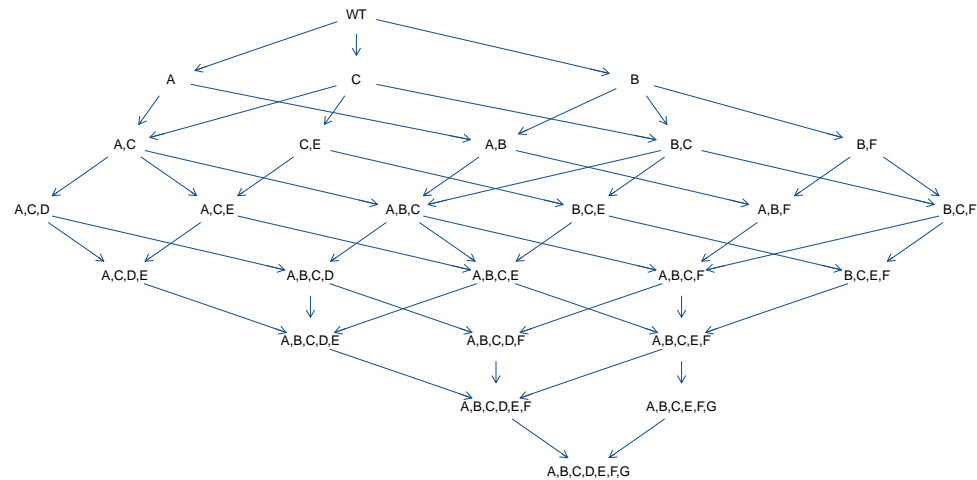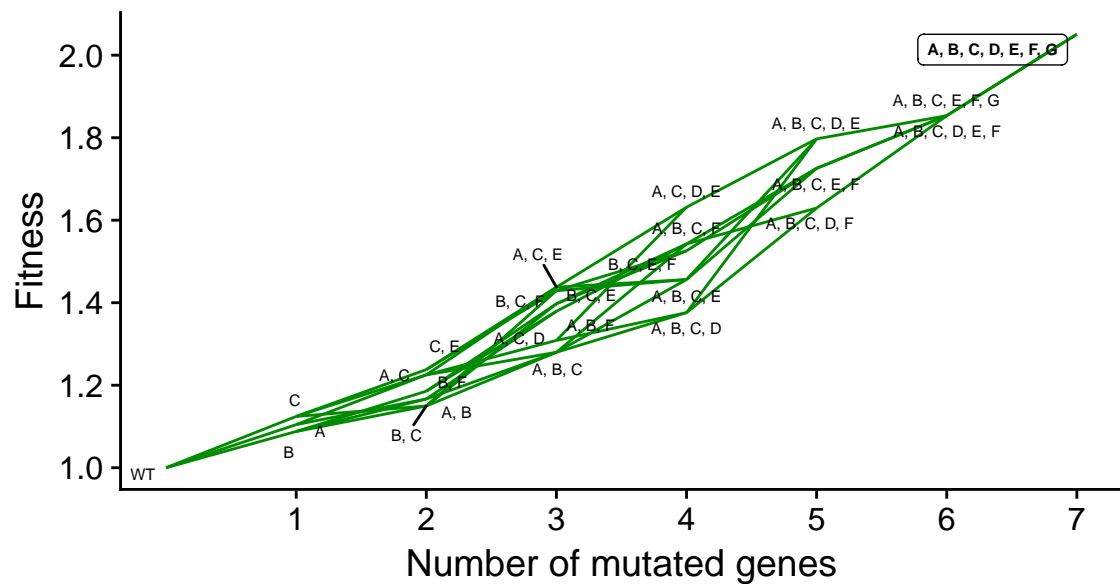

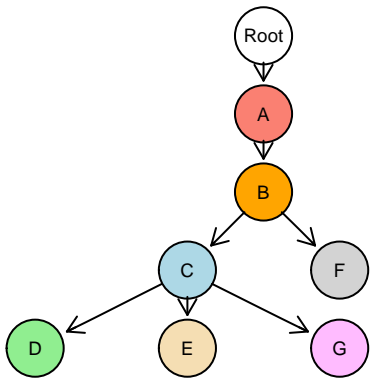

*ID* wNAatqIHqMblvMb  
*acc genotypes* 20  
*peaks no back* 1  
*removed edges* 0  
*prop rem edges* 0

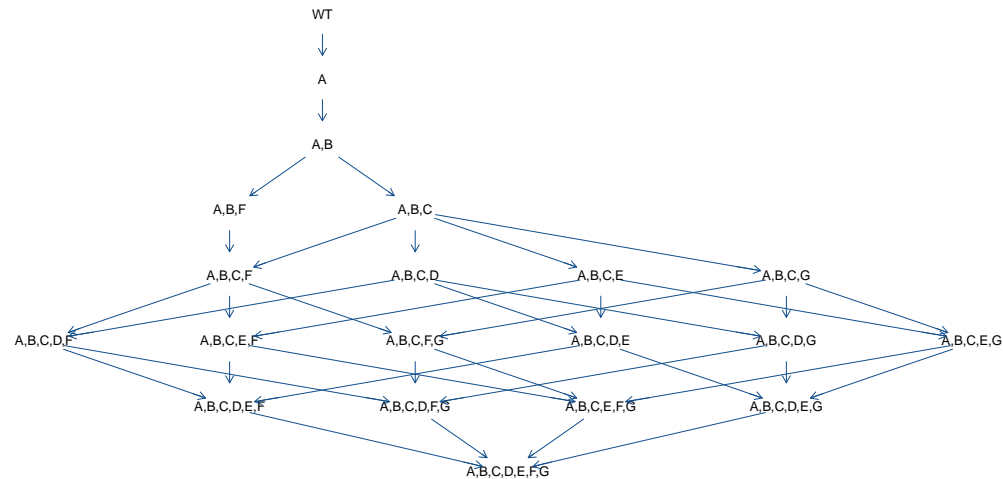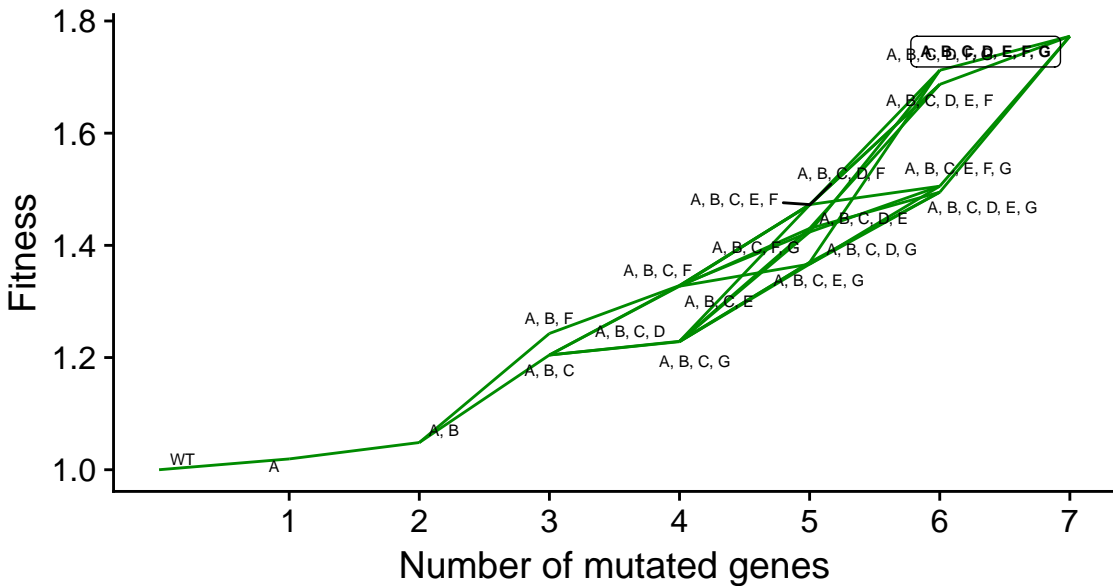

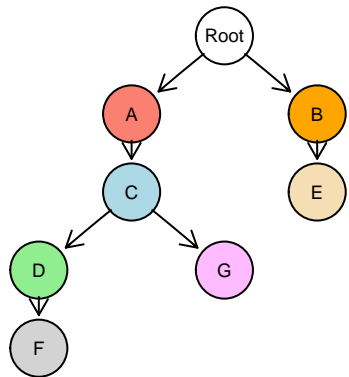

ID **Wo7CkQUAYwflkfX4**  
 acc genotypes **24**  
 peaks no back **1**  
 removed edges **0**  
 prop rem edges **0**

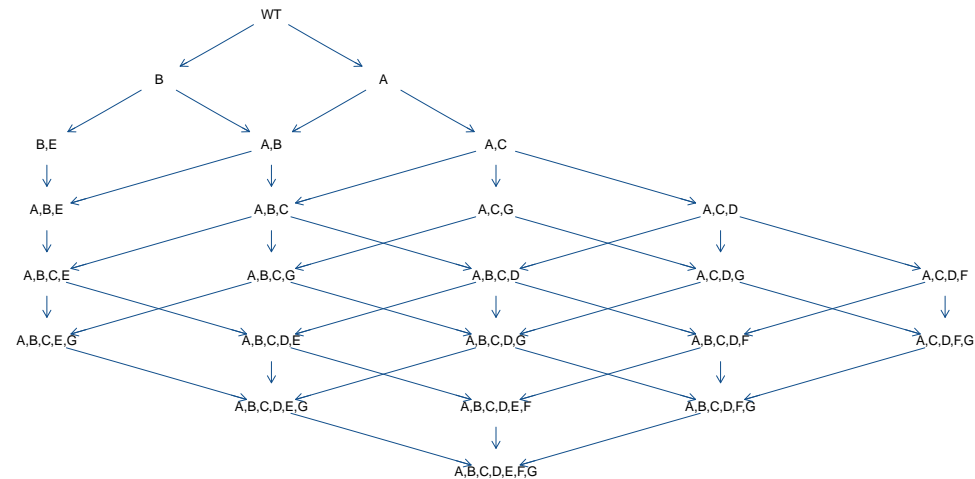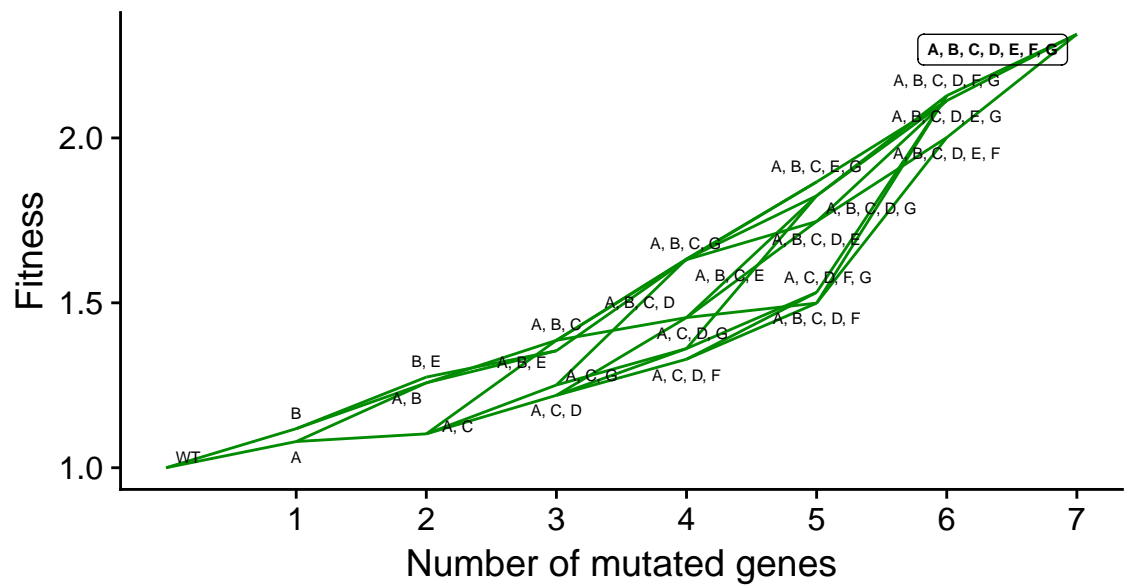

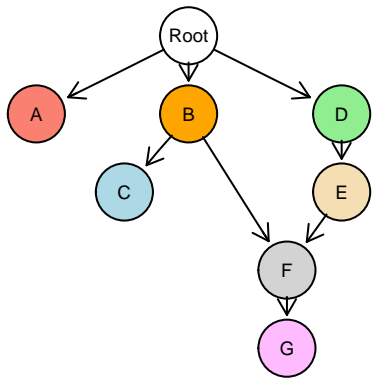

ID **WoqvN8oF47jbnBK**  
 acc genotypes **26**  
 peaks no back **1**  
 removed edges **0**  
 prop rem edges **0**

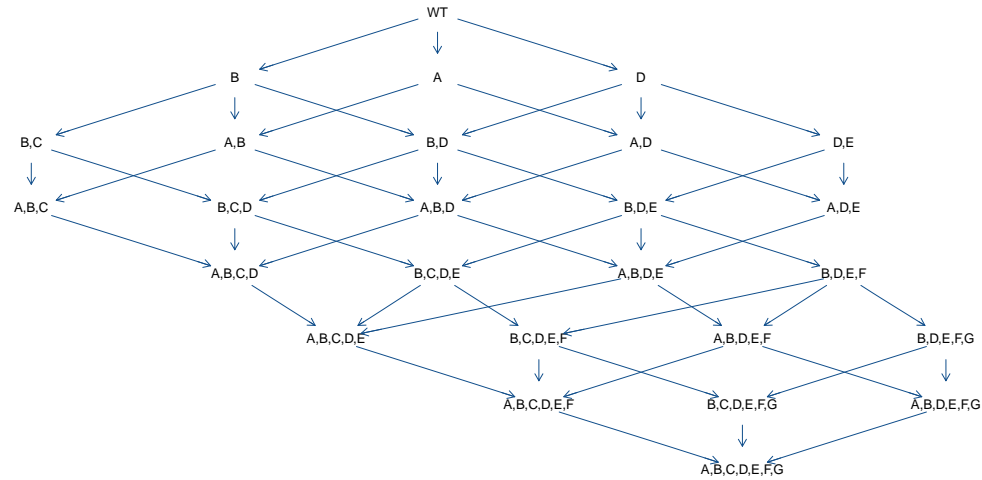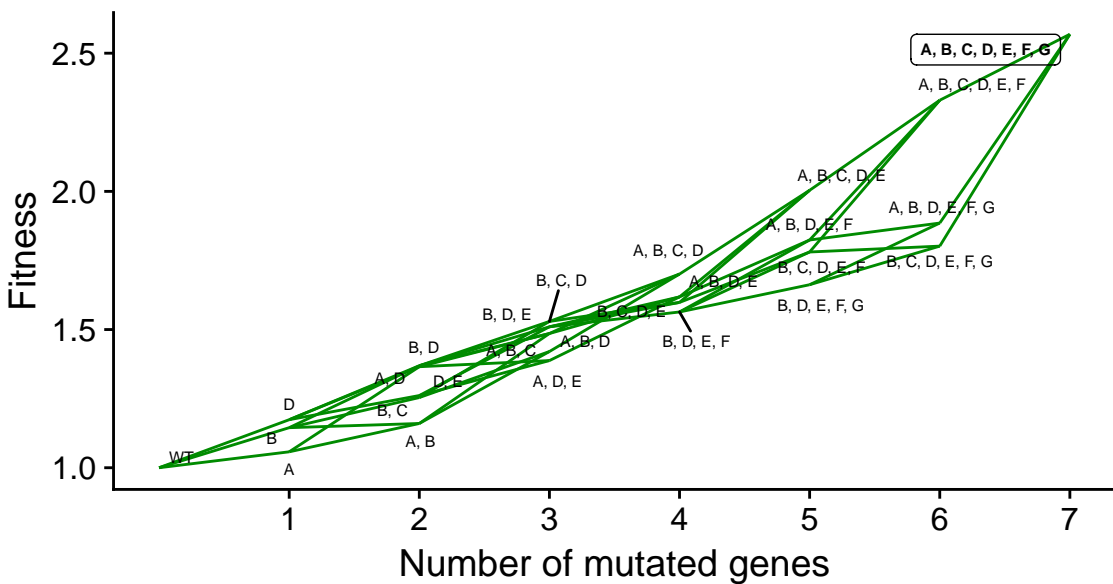

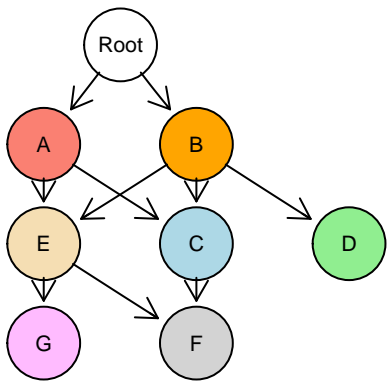

*ID* WQ5ixaPdtGNgofTu  
*acc genotypes* 20  
*peaks no back* 1  
*removed edges* 0  
*prop rem edges* 0

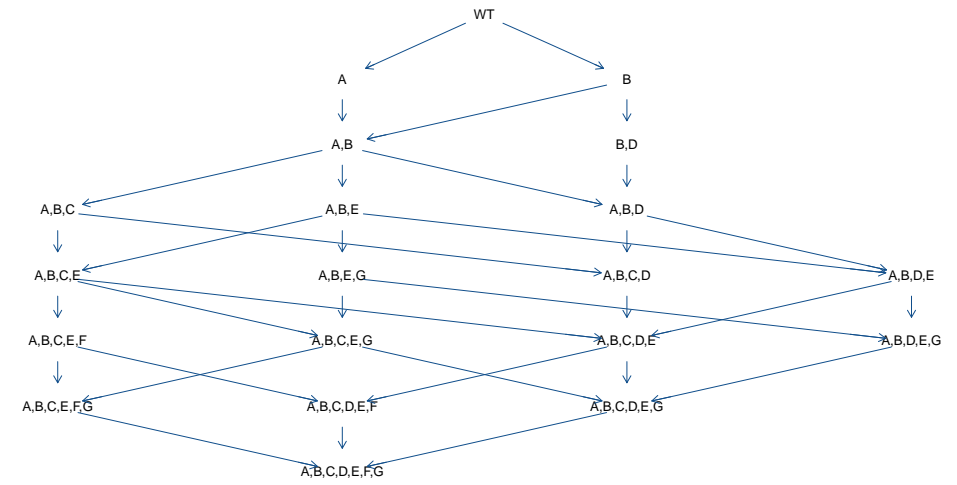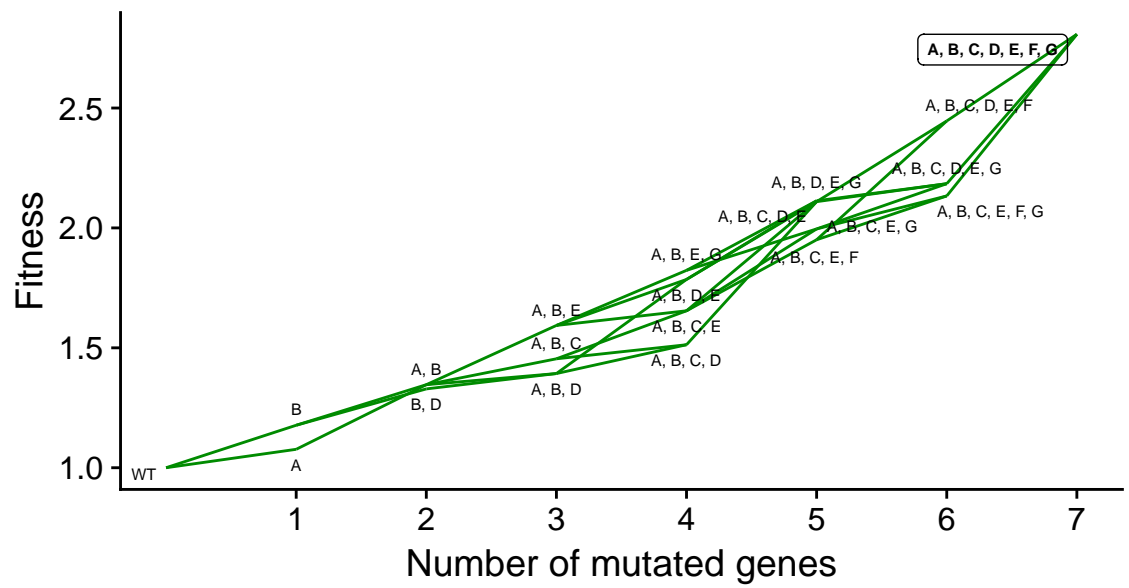

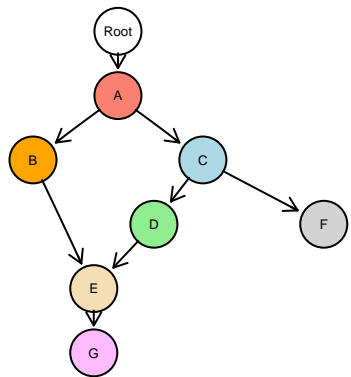

*ID* wrcr1dFF7SQNSwts  
*acc genotypes* 15  
*peaks no back* 1  
*removed edges* 0  
*prop rem edges* 0

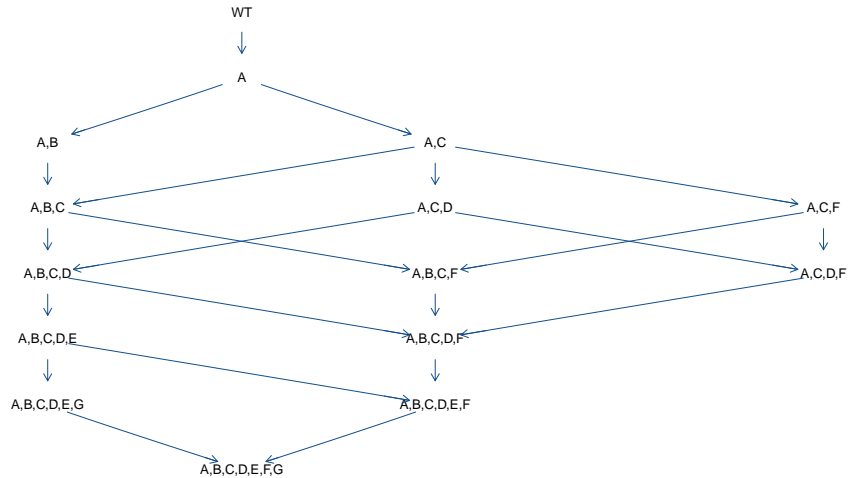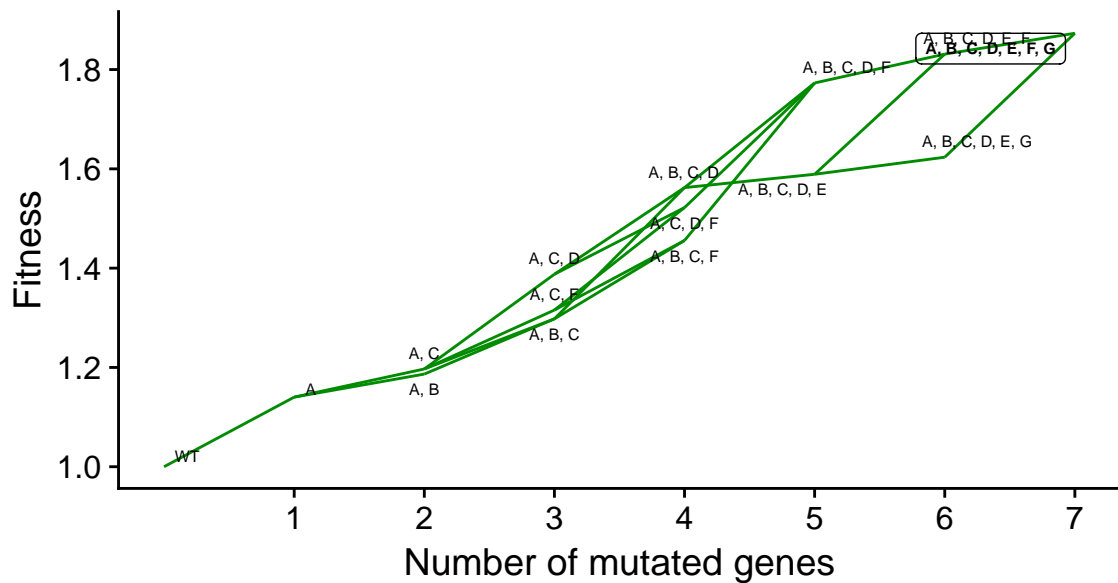

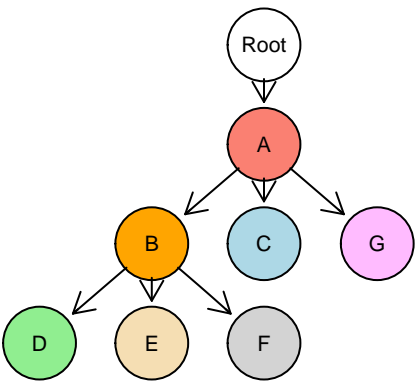

ID **wrRTzMwK5mQOC85K**  
 acc genotypes **37**  
 peaks no back **1**  
 removed edges **0**  
 prop rem edges **0**

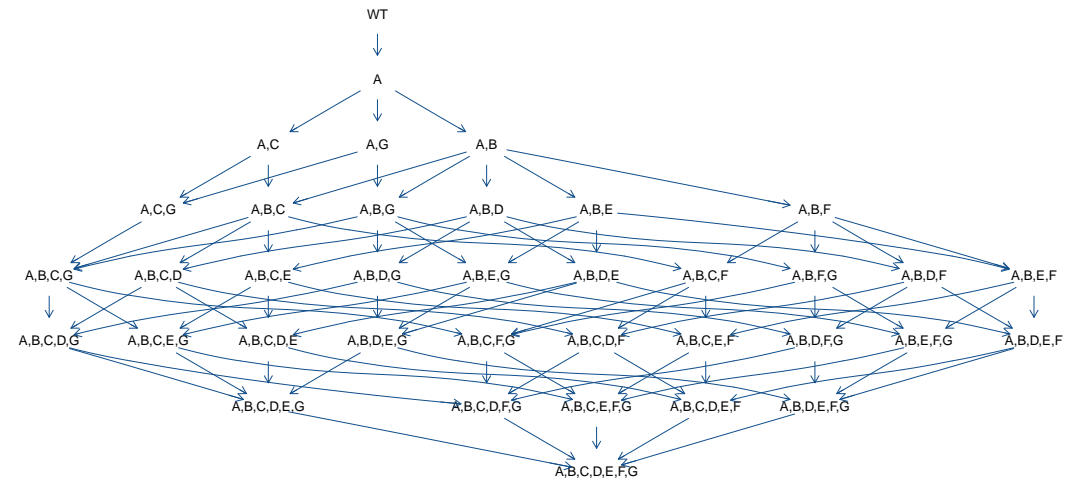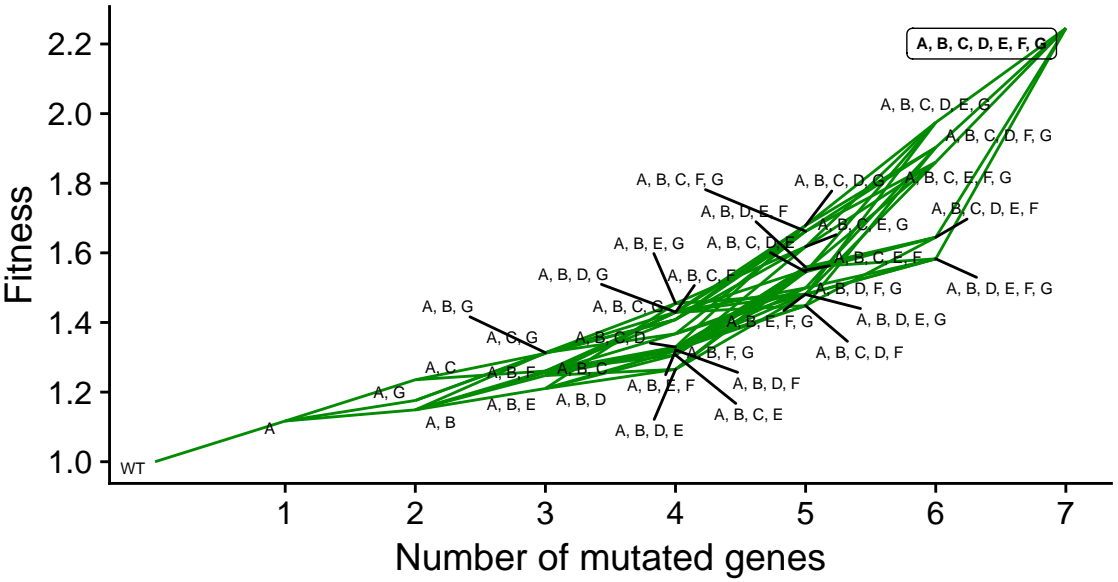



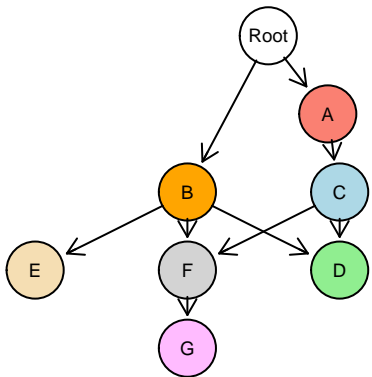

ID **WTwHv3VrTVwsxPNF**  
 acc genotypes **19**  
 peaks no back **1**  
 removed edges **0**  
 prop rem edges **0**

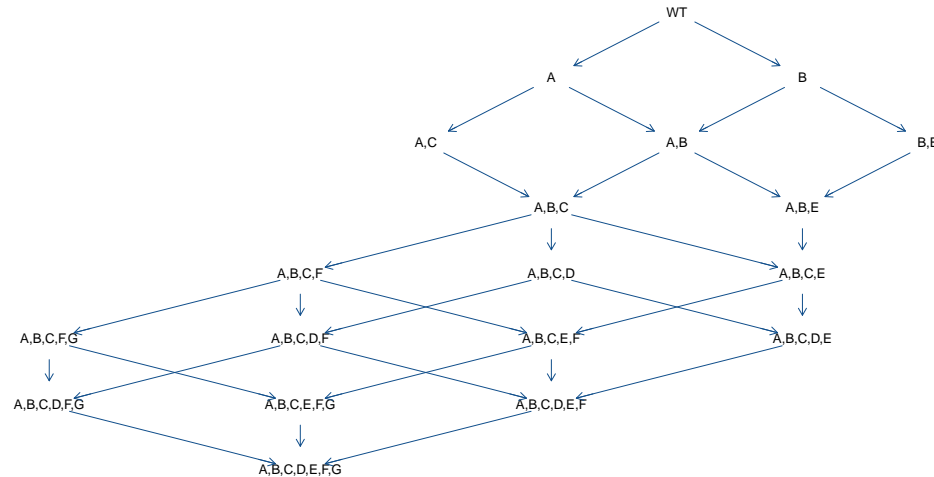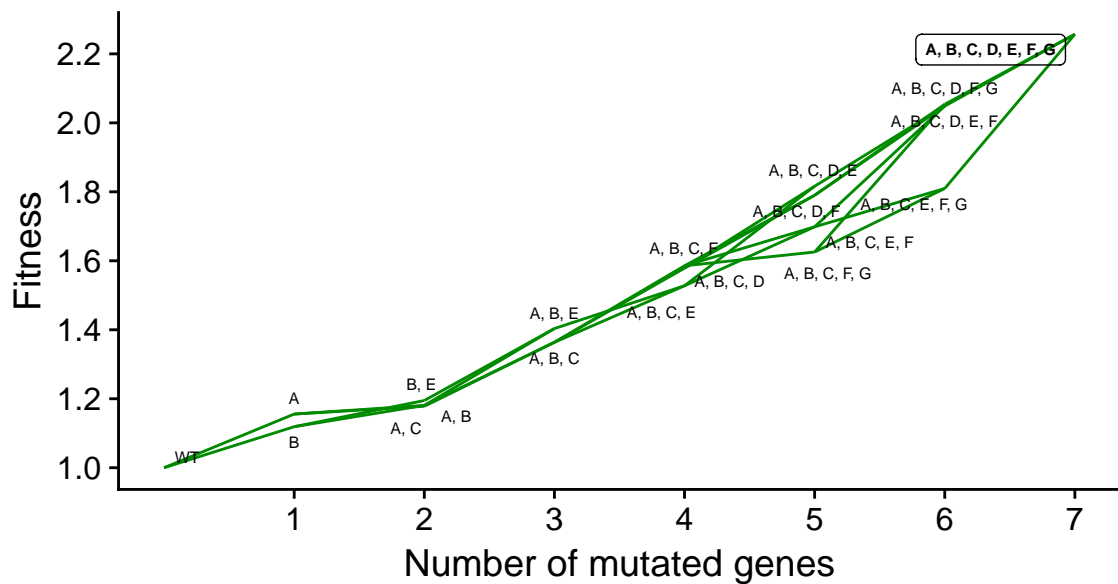

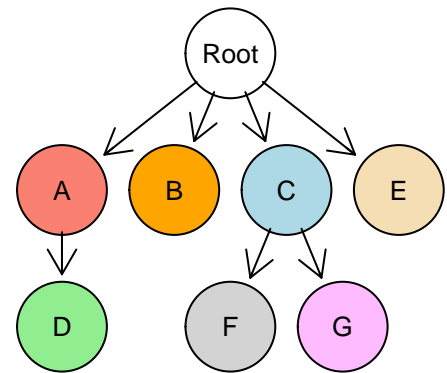

ID **wu54FEWu694xA1Ko**  
 acc genotypes **60**  
 peaks no back **1**  
 removed edges **0**  
 prop rem edges **0**

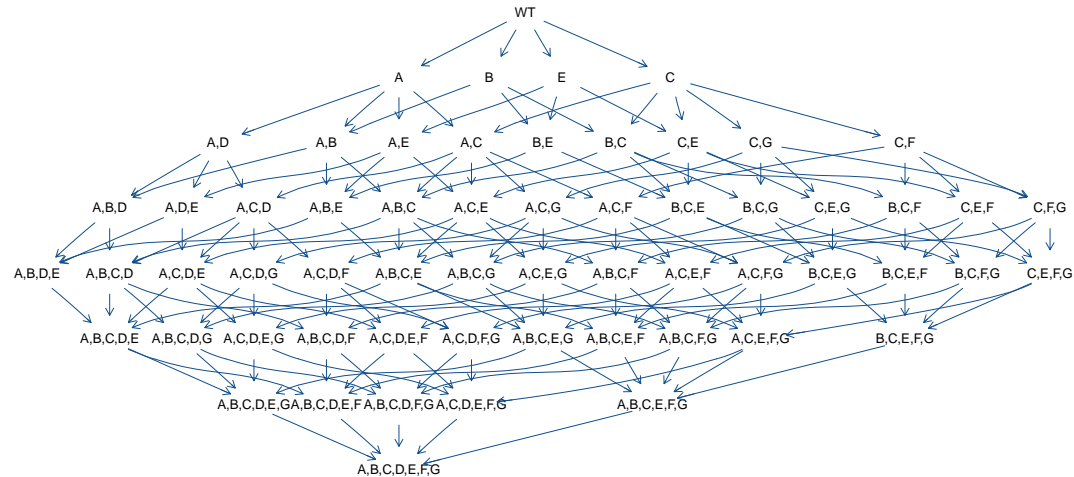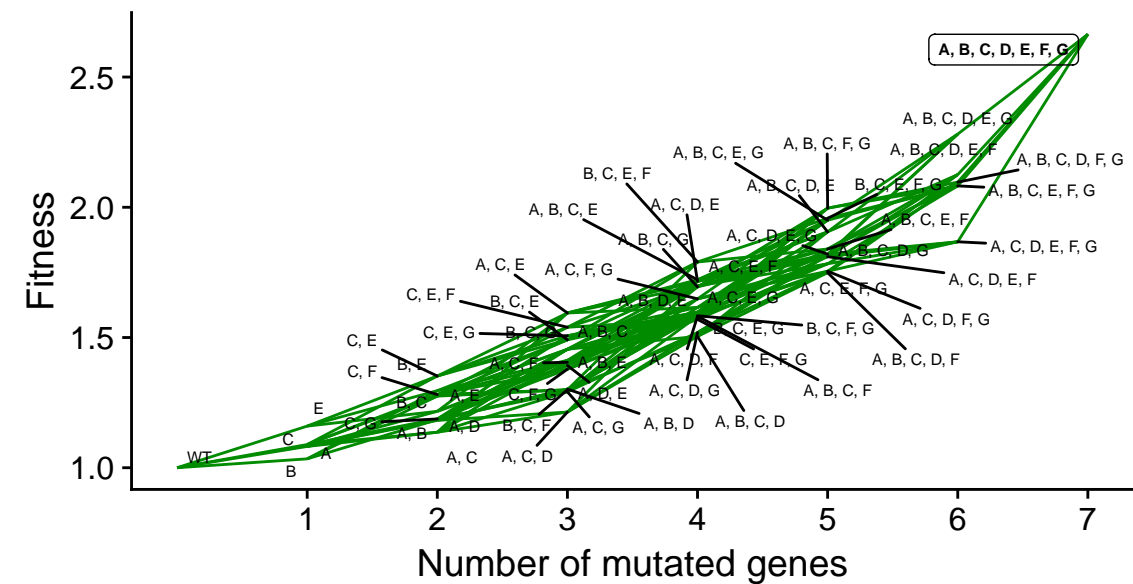

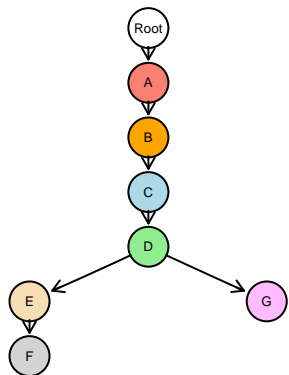

ID **wXqQ210QBkvlJzh1K**  
 acc genotypes **10**  
 peaks no back **1**  
 removed edges **0**  
 prop rem edges **0**

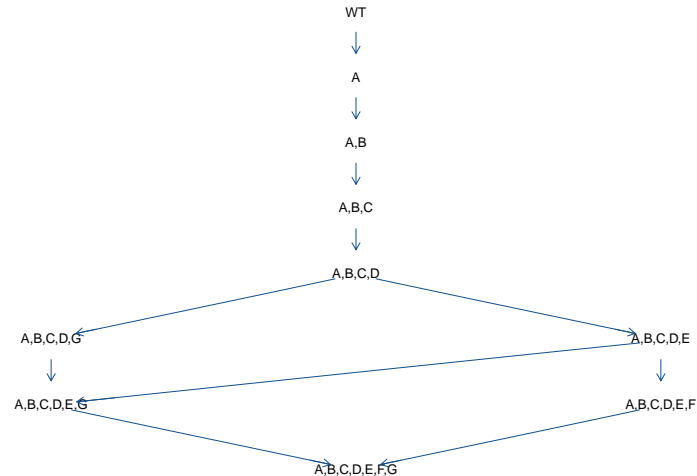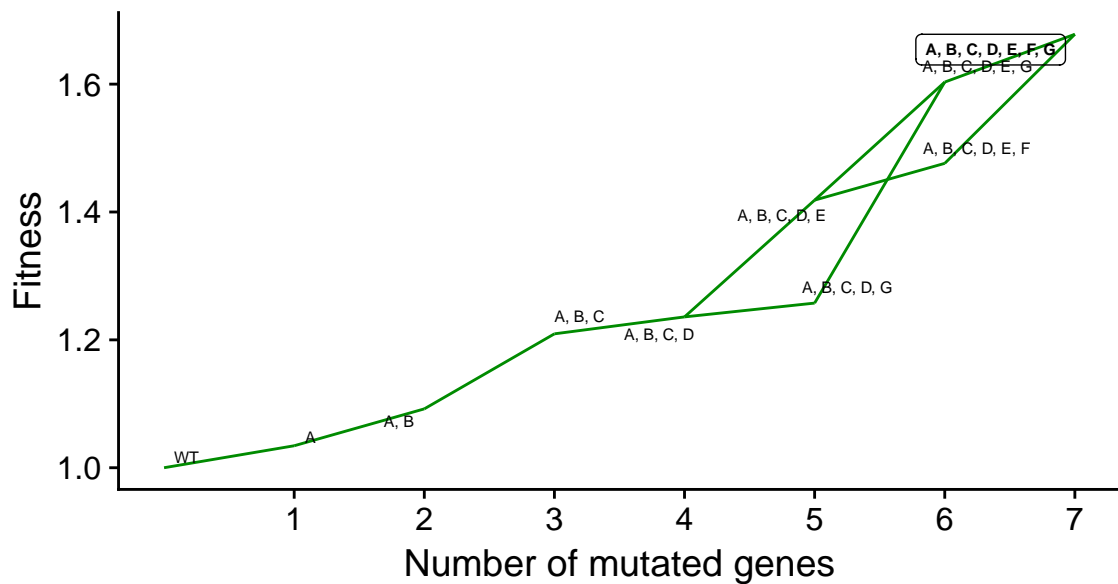

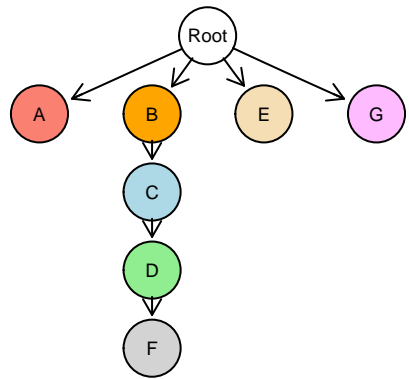

ID **WzFbSkNFewLZM2Lc**  
 acc genotypes **40**  
 peaks no back 1  
 removed edges 0  
 prop rem edges 0

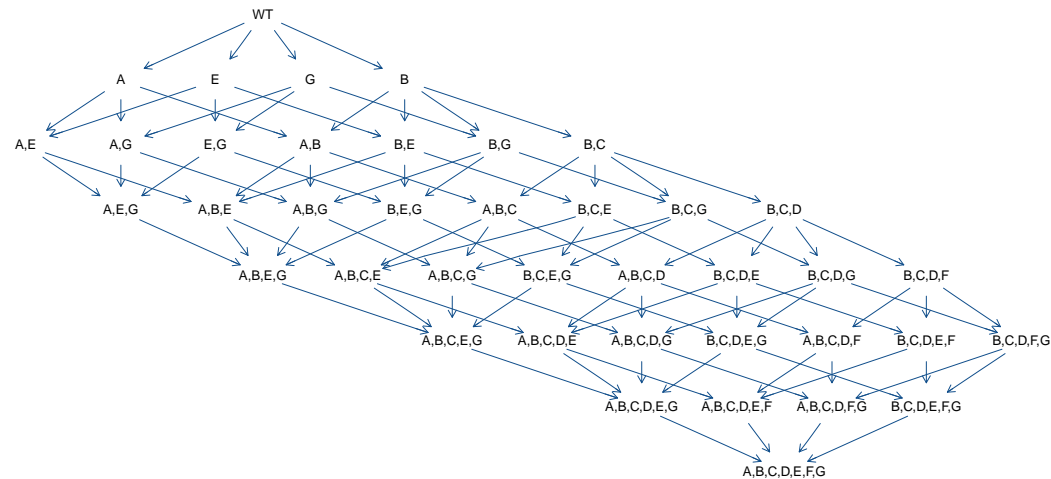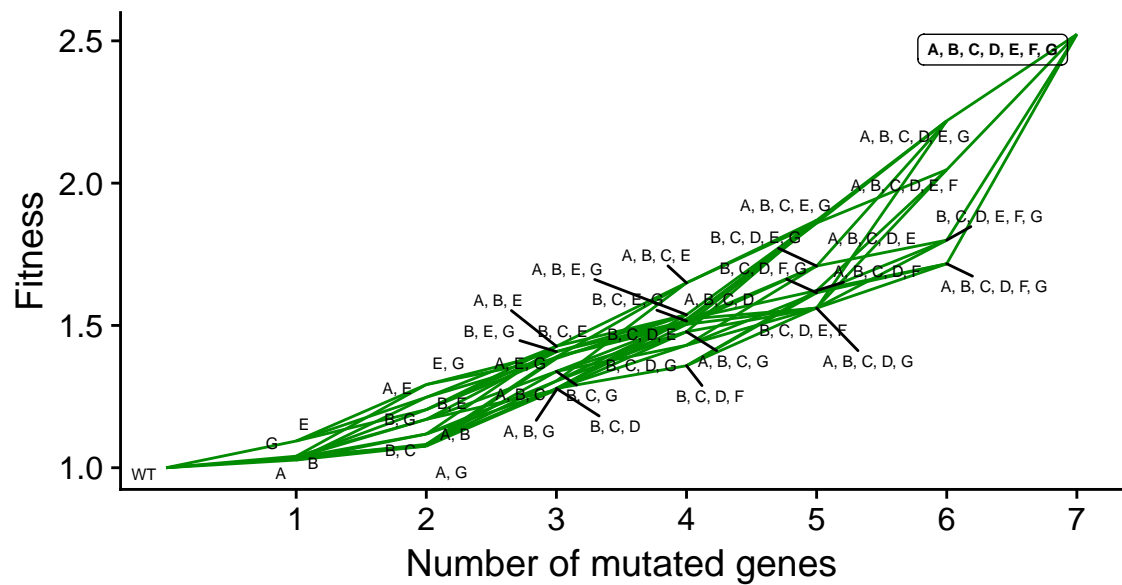

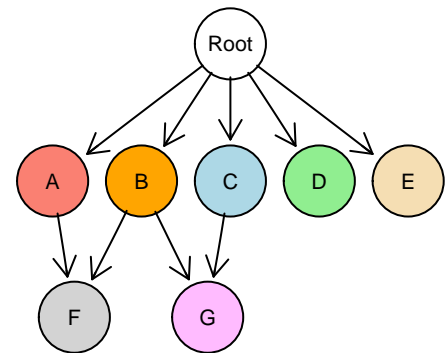

ID **wZHRIWE1jjVBM1mQ**  
*acc genotypes* **52**  
*peaks no back* **1**  
*removed edges* **0**  
*prop rem edges* **0**

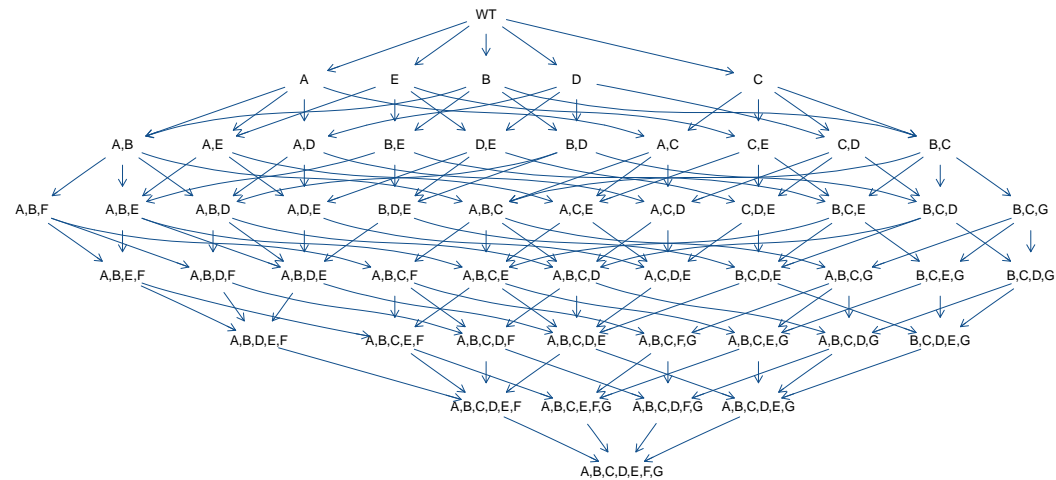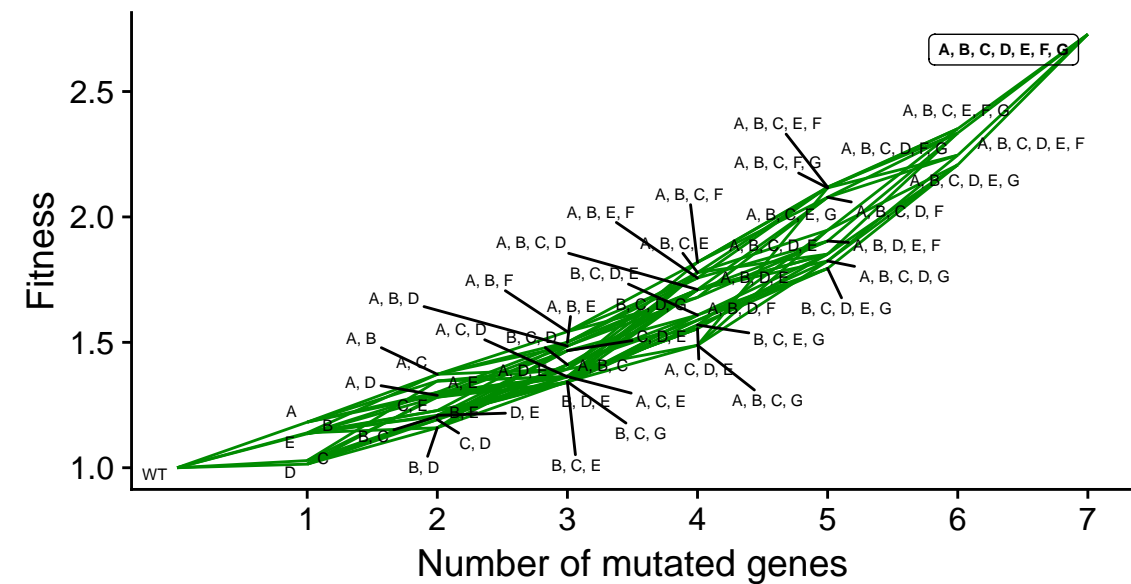

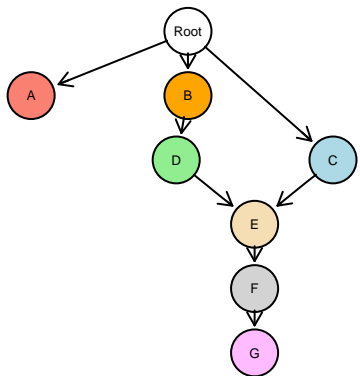

ID xBMt9dOS3zBvChSy  
 acc genotypes 18  
 peaks no back 1  
 removed edges 0  
 prop rem edges 0

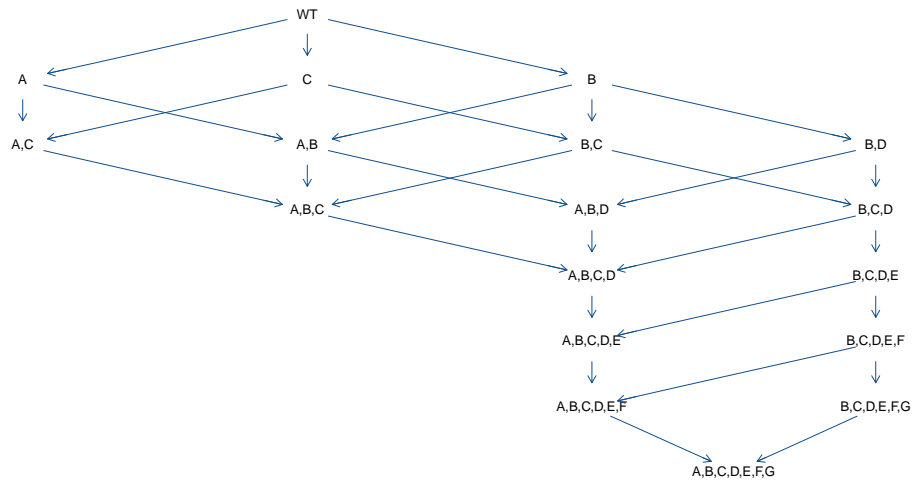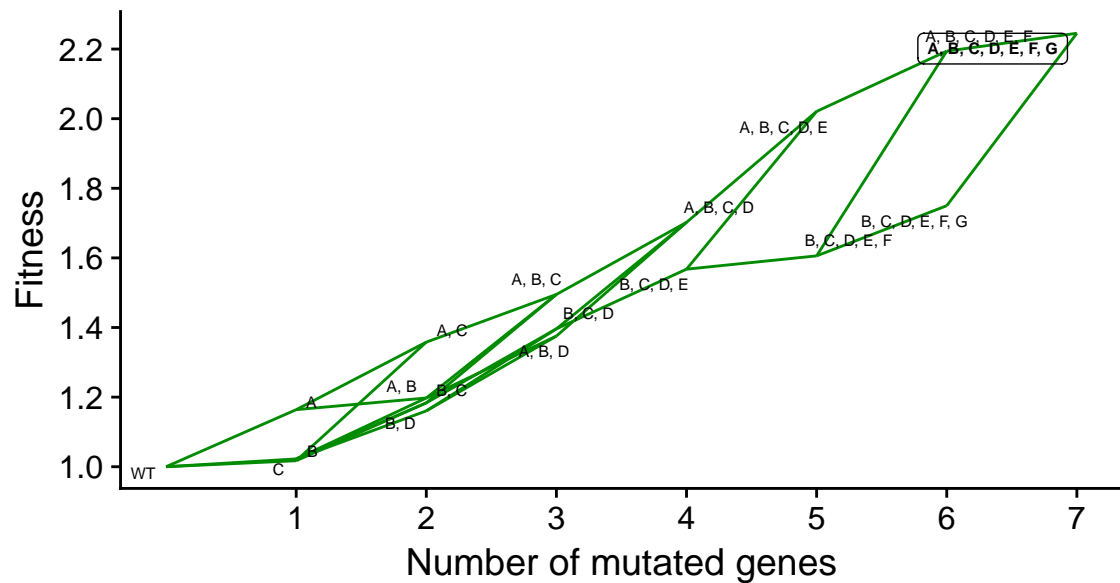

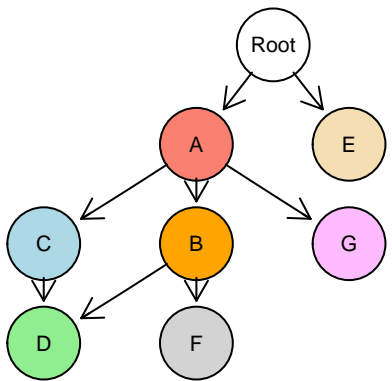

*ID* xkgudeGhJGOIP7X7  
*acc genotypes* 34  
*peaks no back* 1  
*removed edges* 0  
*prop rem edges* 0

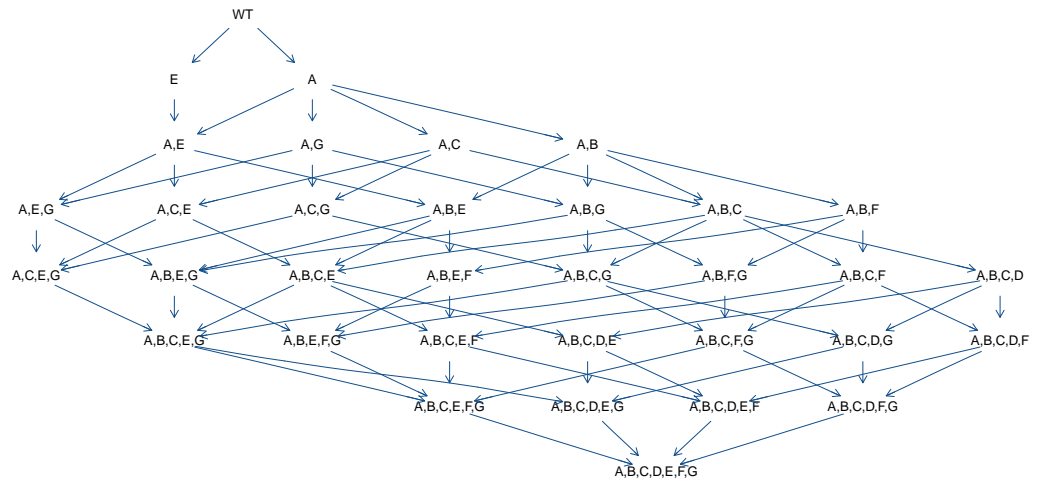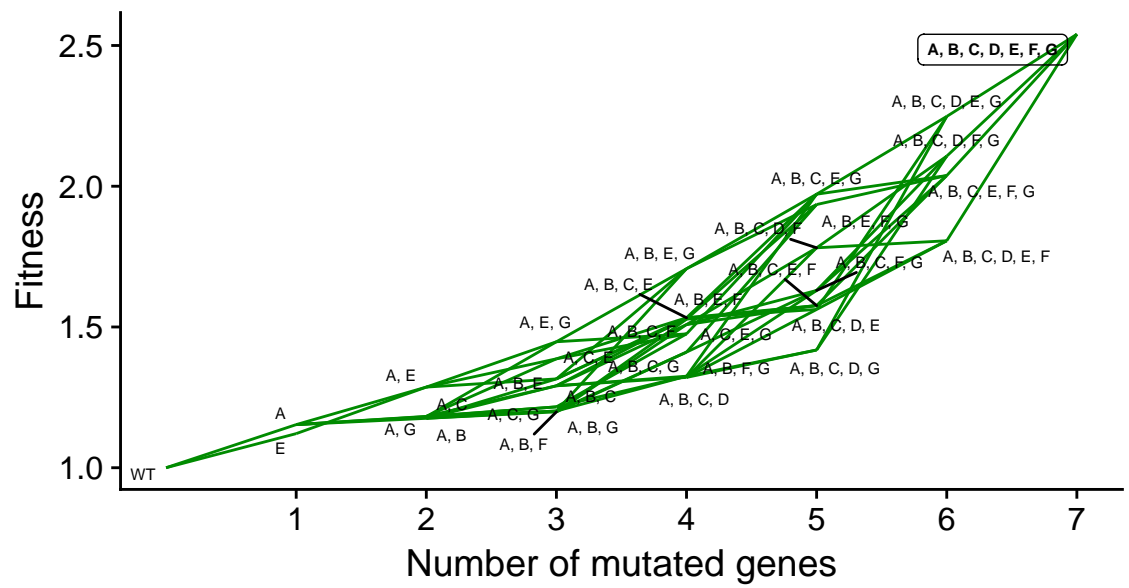

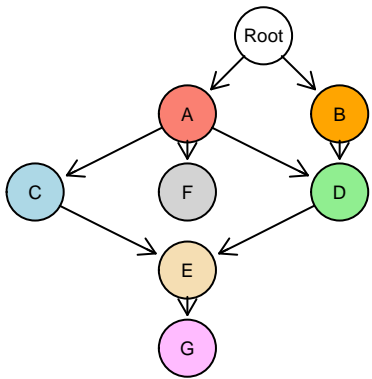

ID **XoIBQBDPpWH3DwDQ**  
 acc genotypes **18**  
 peaks no back 1  
 removed edges 0  
 prop rem edges 0

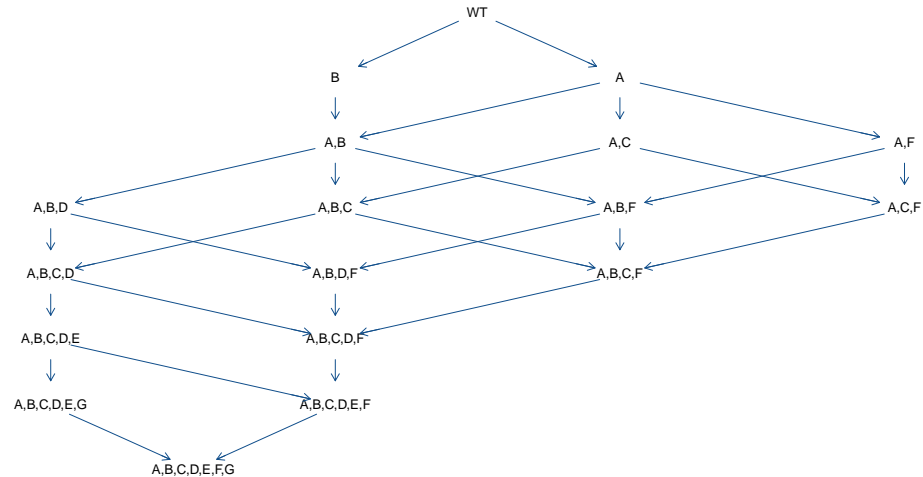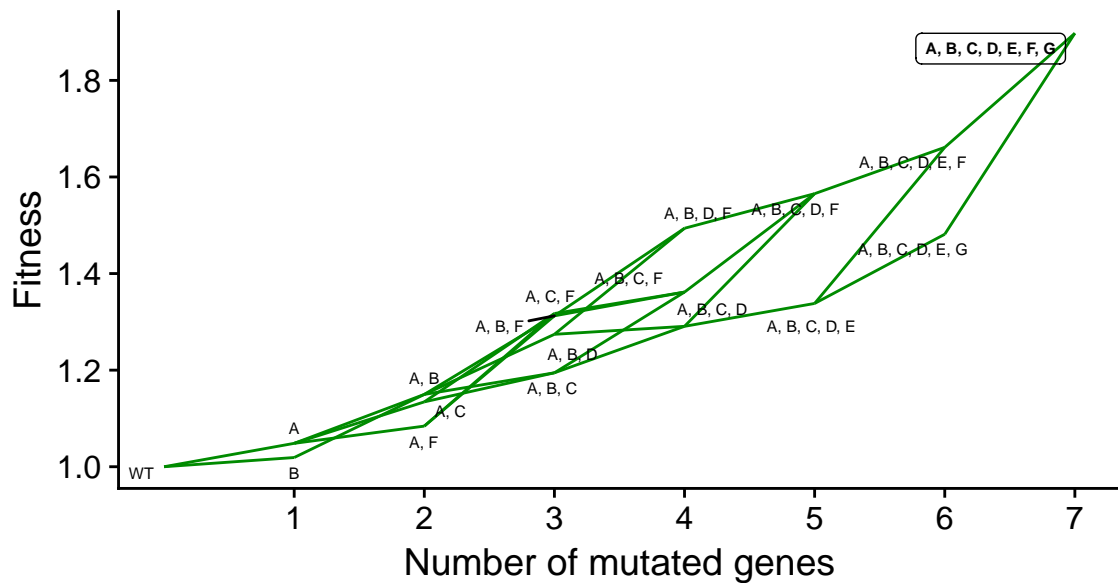



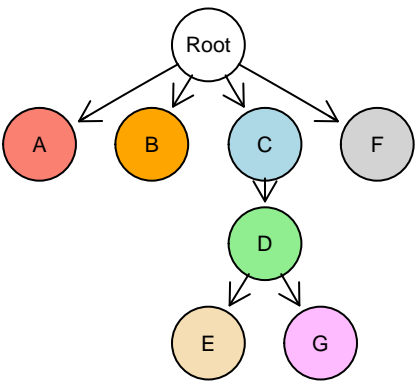

ID **XRovuAJWINYiVJHn**  
 acc genotypes **48**  
 peaks no back **1**  
 removed edges **0**  
 prop rem edges **0**

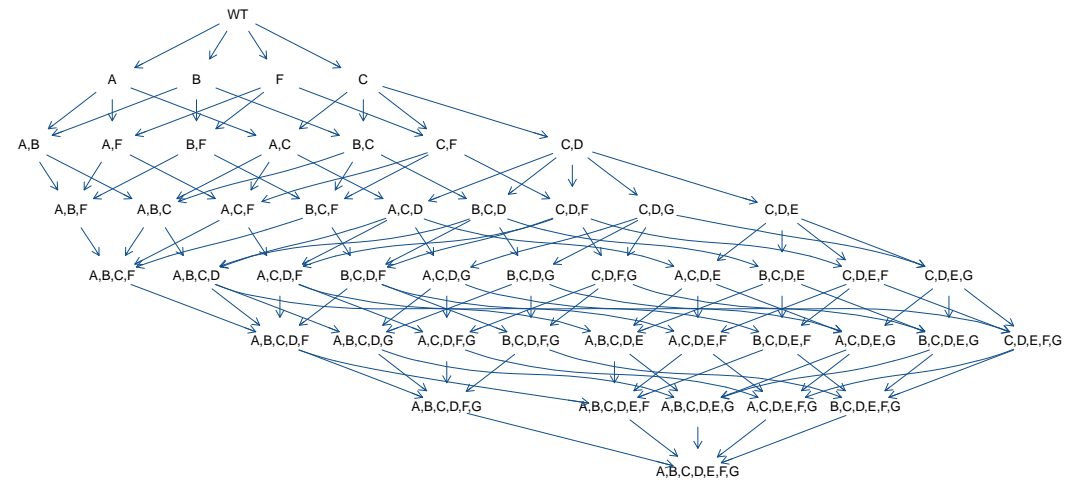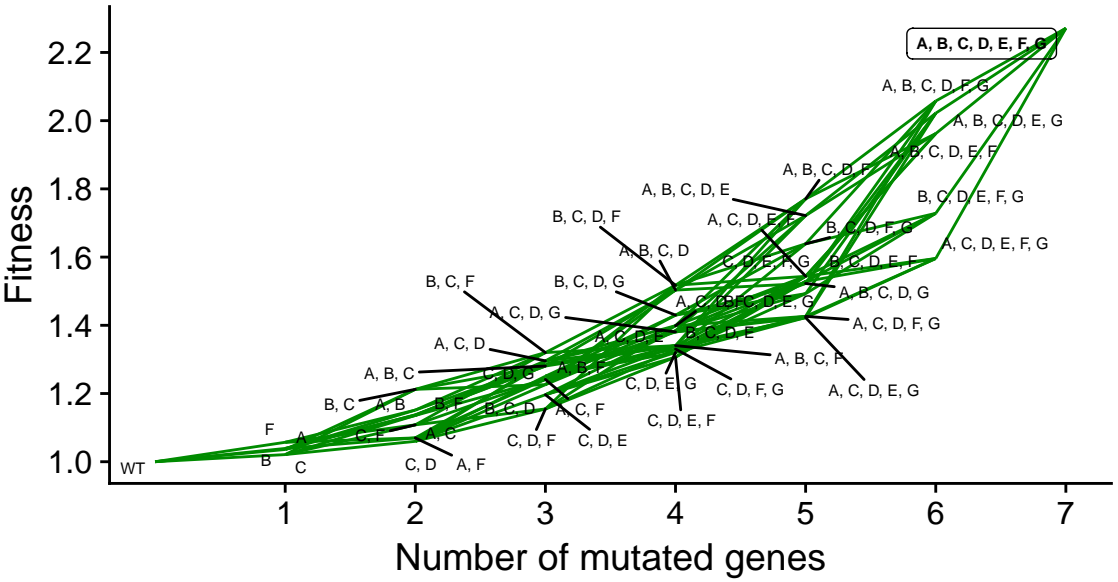

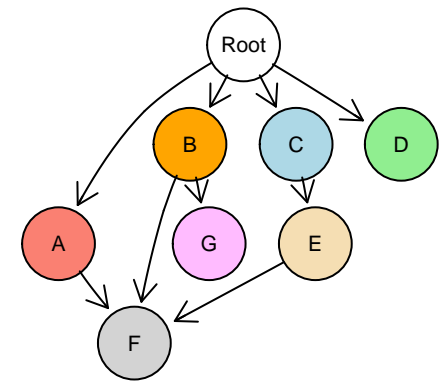

ID xVDfqEWHyqTK7PeA  
 acc genotypes 40  
 peaks no back 1  
 removed edges 0  
 prop rem edges 0

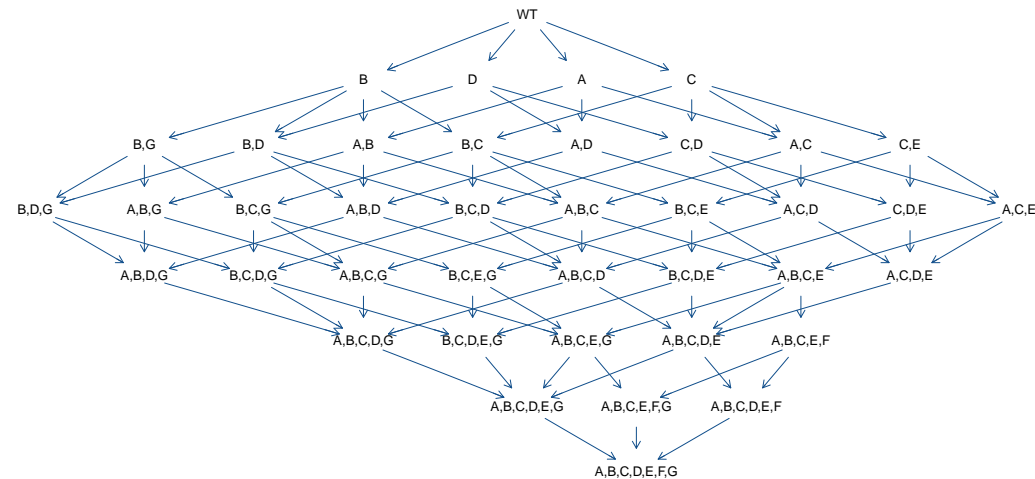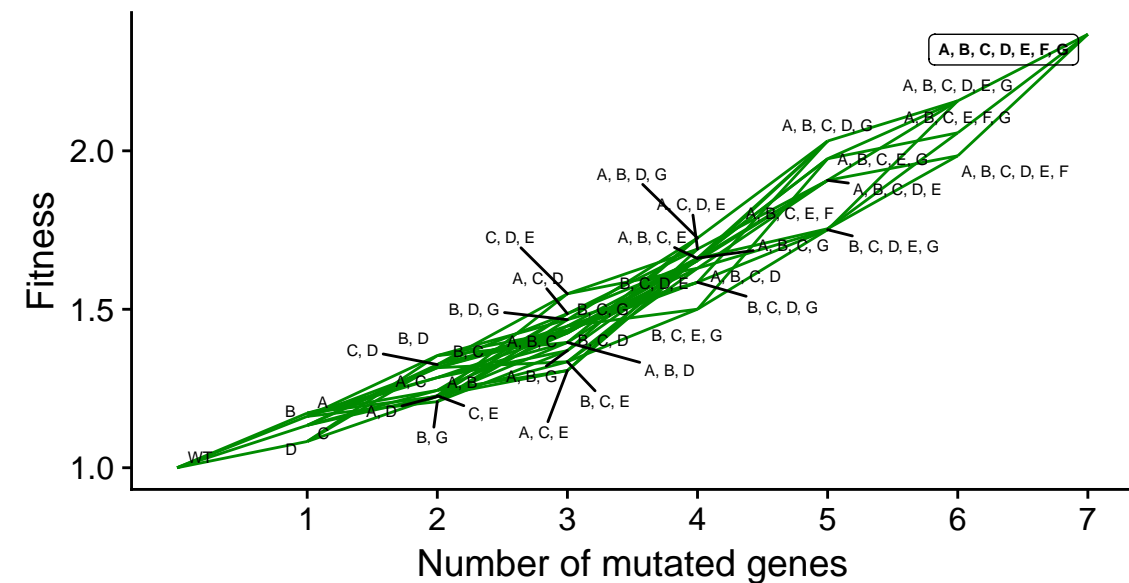

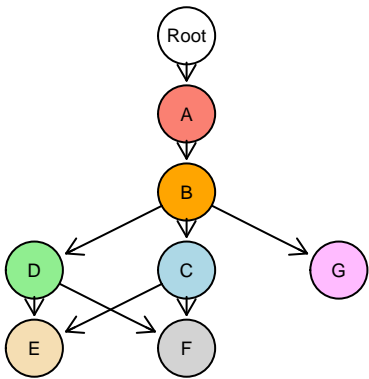

*ID* y46oBk106Lnsh10yaQ  
*acc genotypes* 16  
*peaks no back* 1  
*removed edges* 0  
*prop rem edges* 0

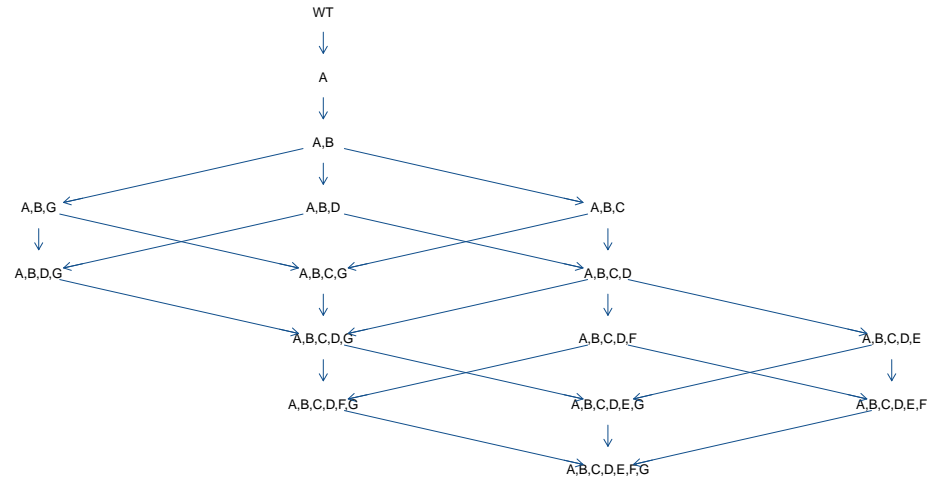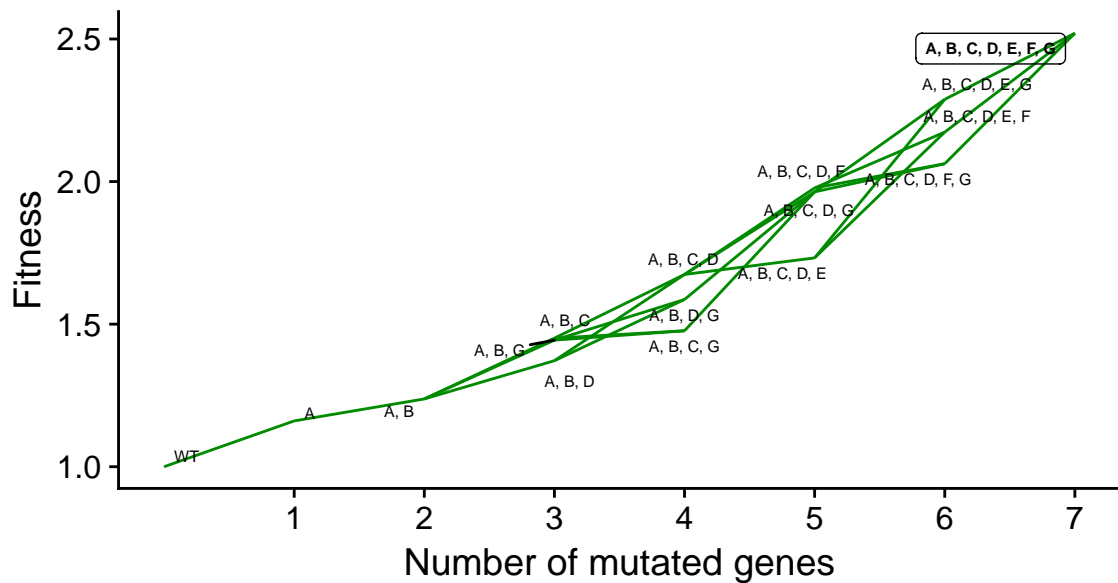

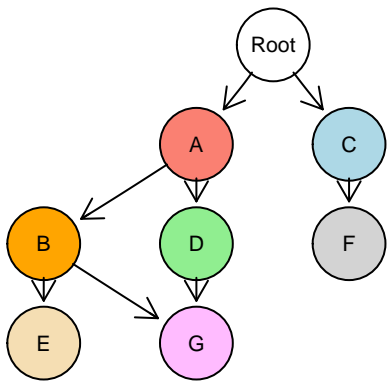

ID **YbCf9soBzZRhuiw10**  
 acc genotypes **27**  
 peaks no back **1**  
 removed edges **0**  
 prop rem edges **0**

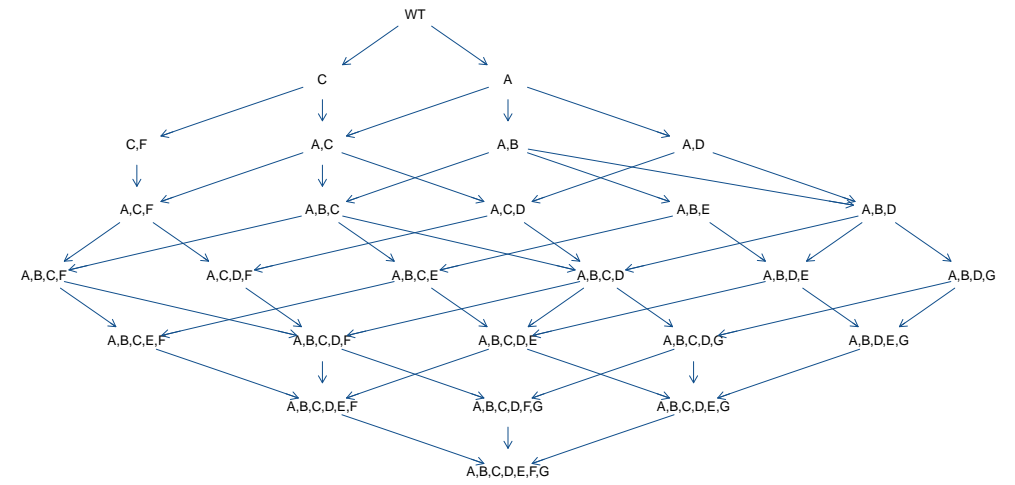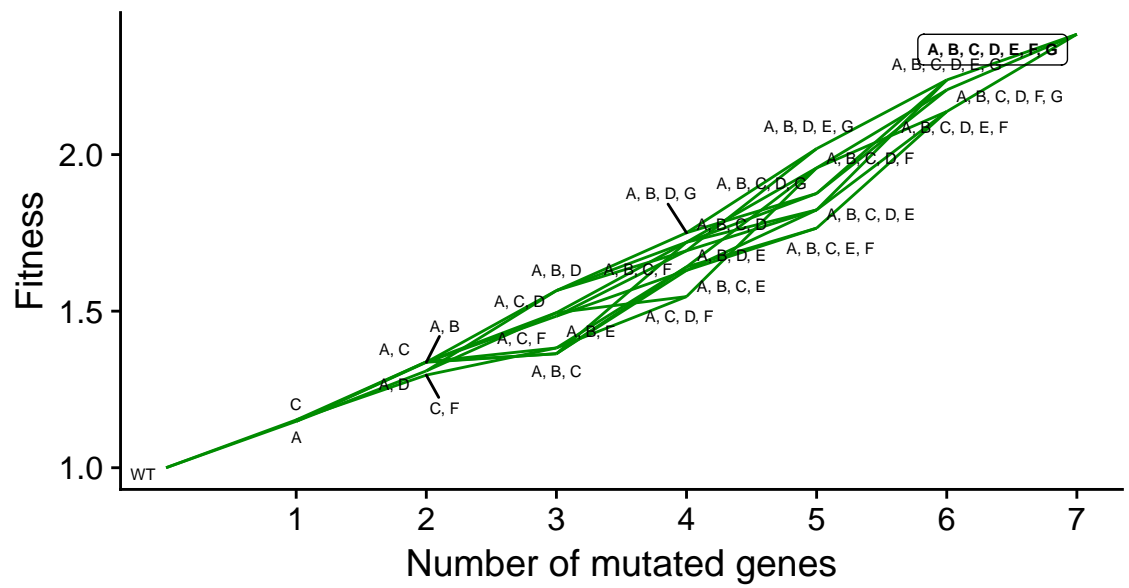

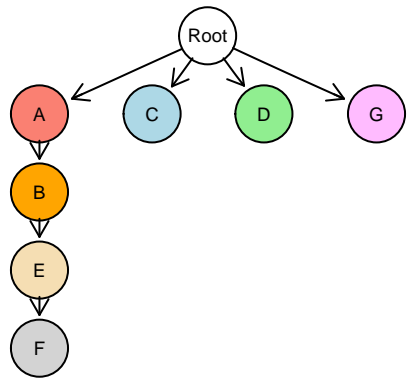

ID YFmY1csTgroJgPCG  
 acc genotypes 40  
 peaks no back 1  
 removed edges 0  
 prop rem edges 0

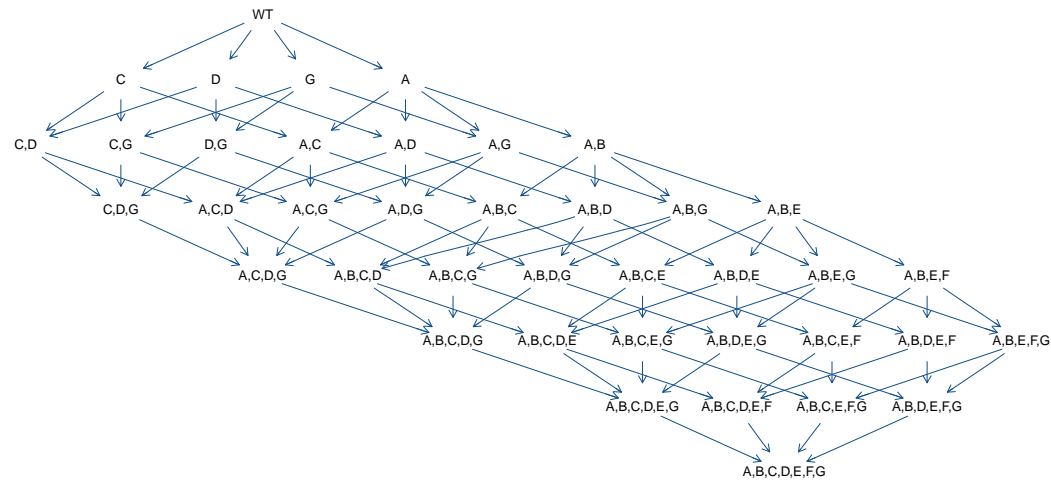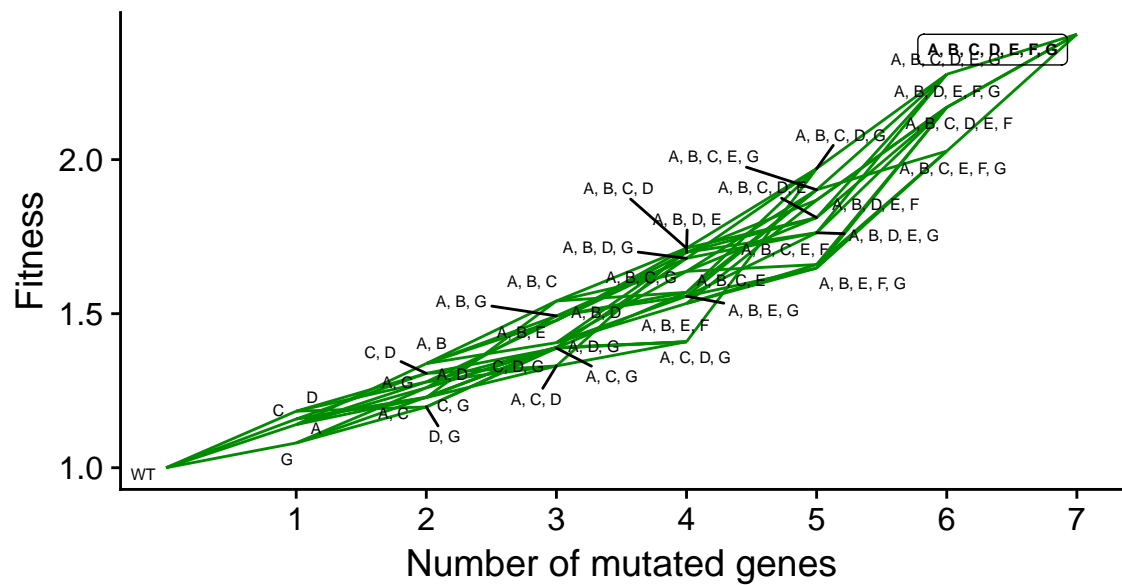

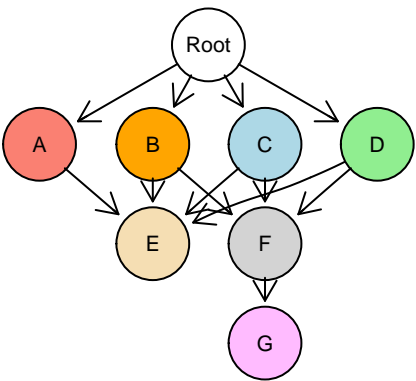

ID **yjwFeMSZVW68gVPI**  
 acc genotypes **23**  
 peaks no back **1**  
 removed edges **0**  
 prop rem edges **0**

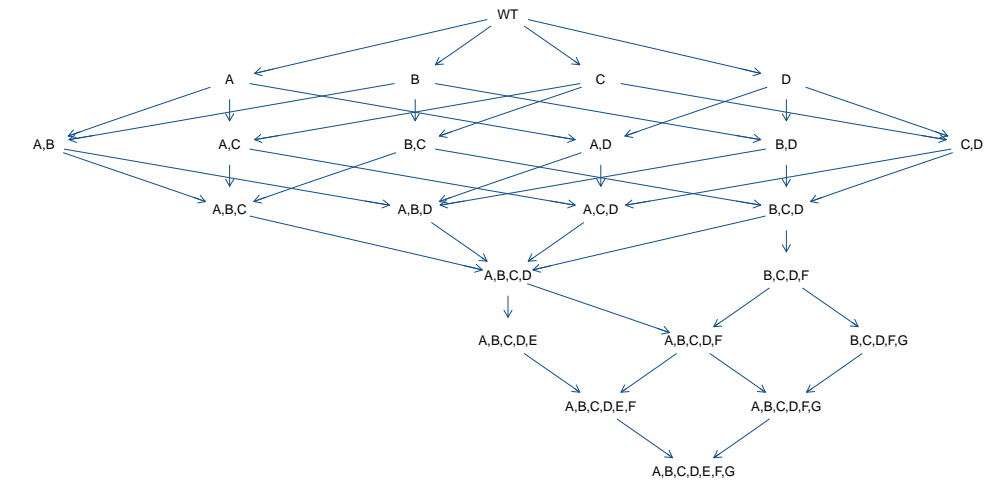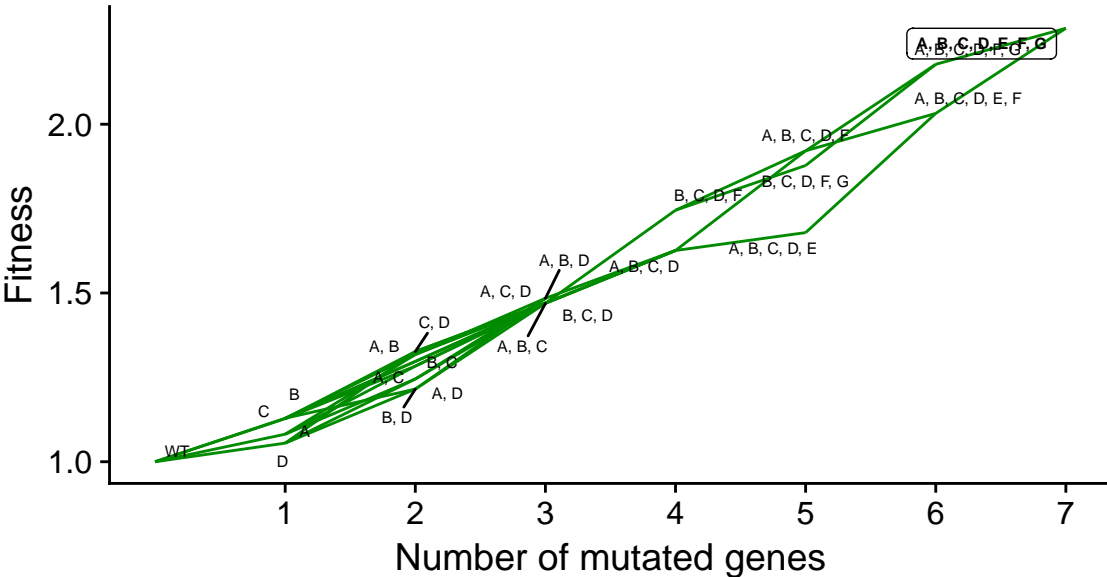

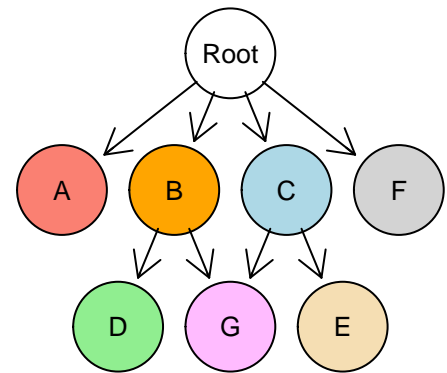

ID **yVIAr6nny7plzy1a**  
 acc genotypes **52**  
 peaks no back **1**  
 removed edges **0**  
 prop rem edges **0**

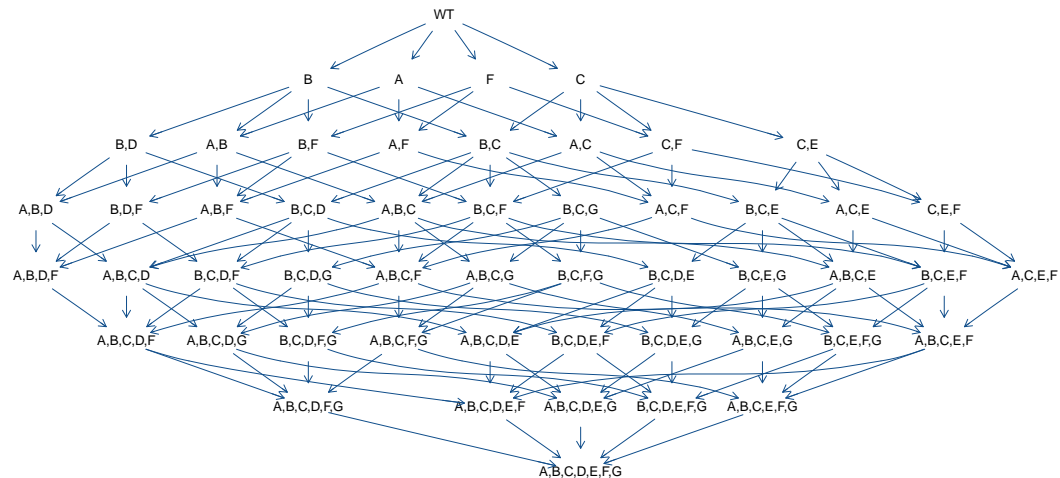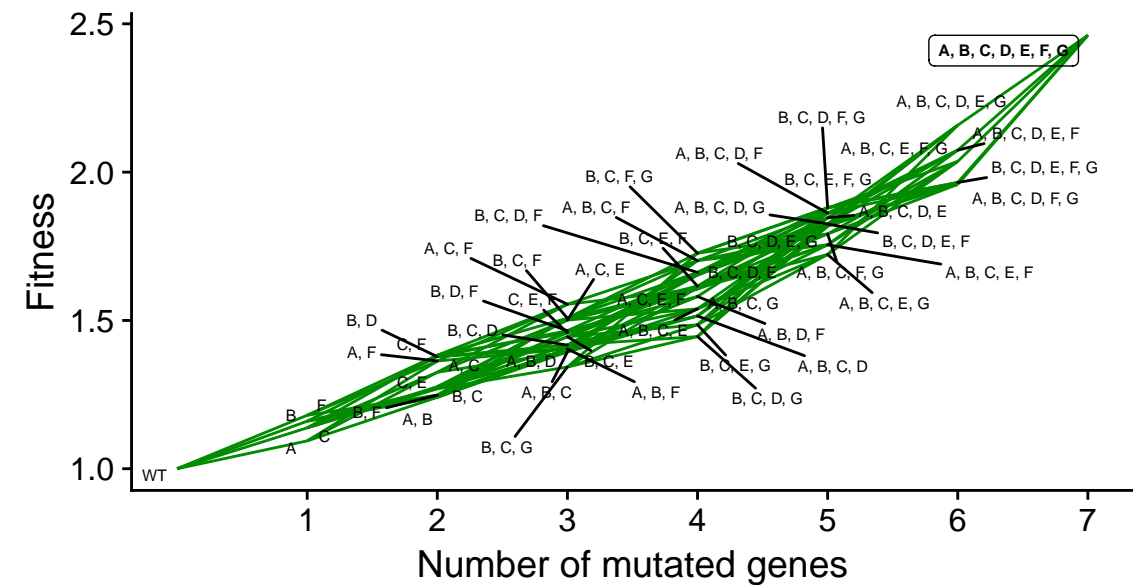

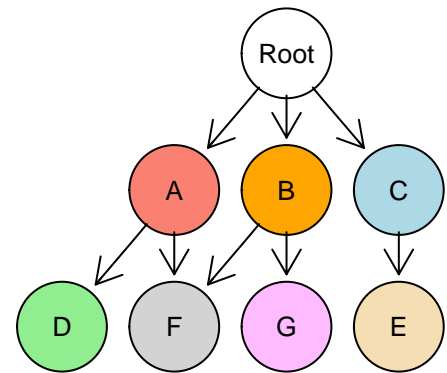

ID YZtw9jhxSkZdMuV2  
 acc genotypes 39  
 peaks no back 1  
 removed edges 0  
 prop rem edges 0

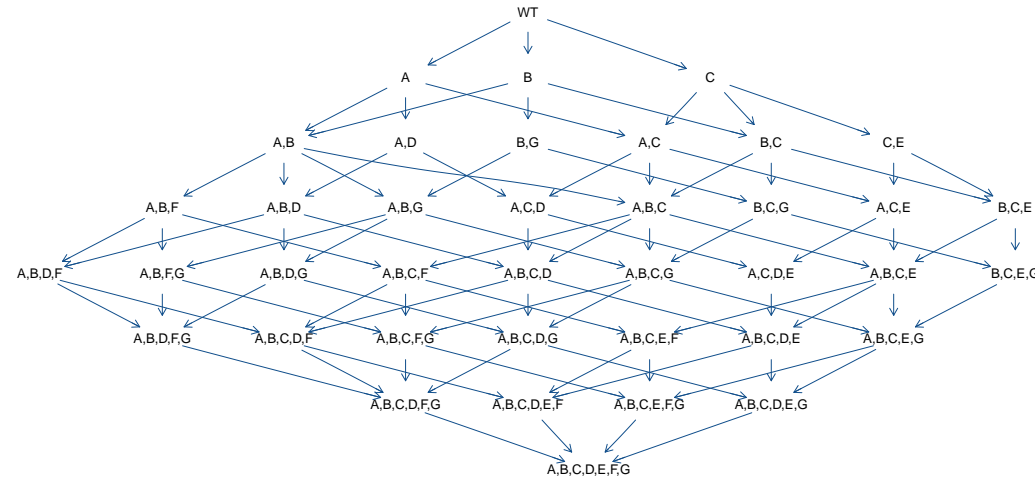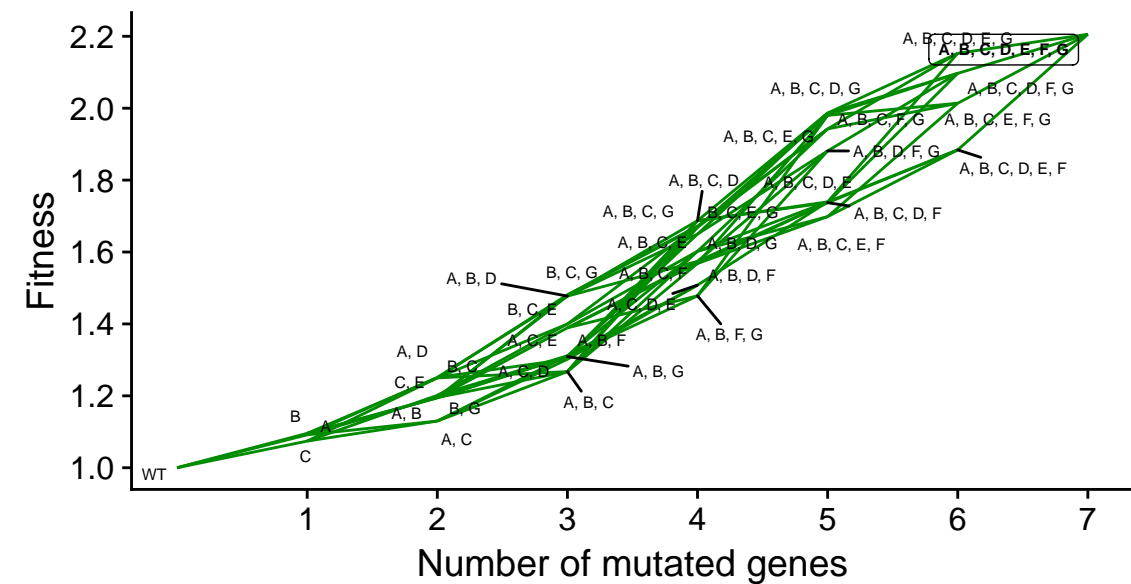



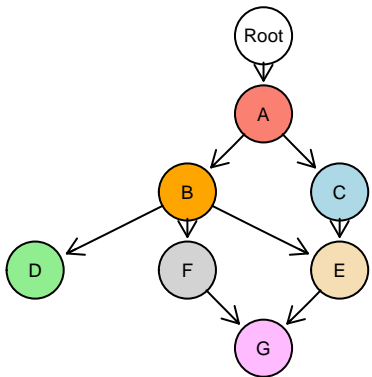

ID **Z5HeEO7UheuYVWra**  
 acc genotypes **17**  
 peaks no back **1**  
 removed edges **0**  
 prop rem edges **0**

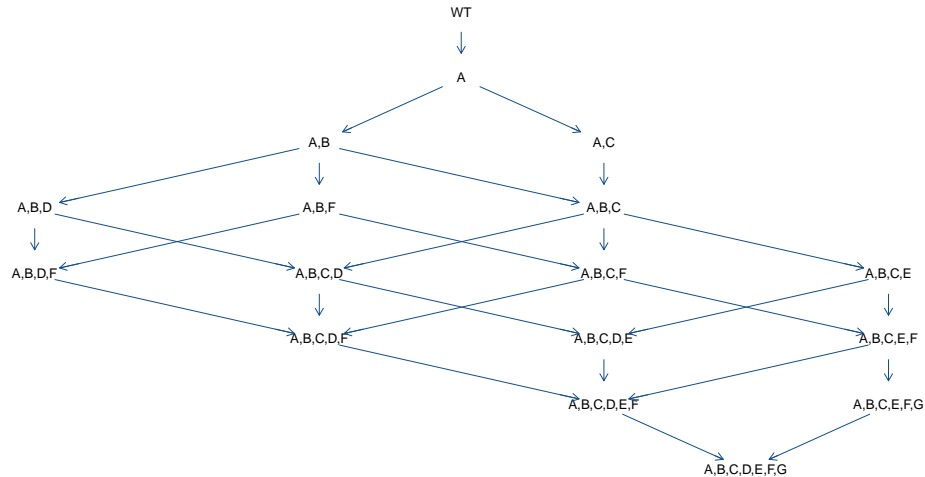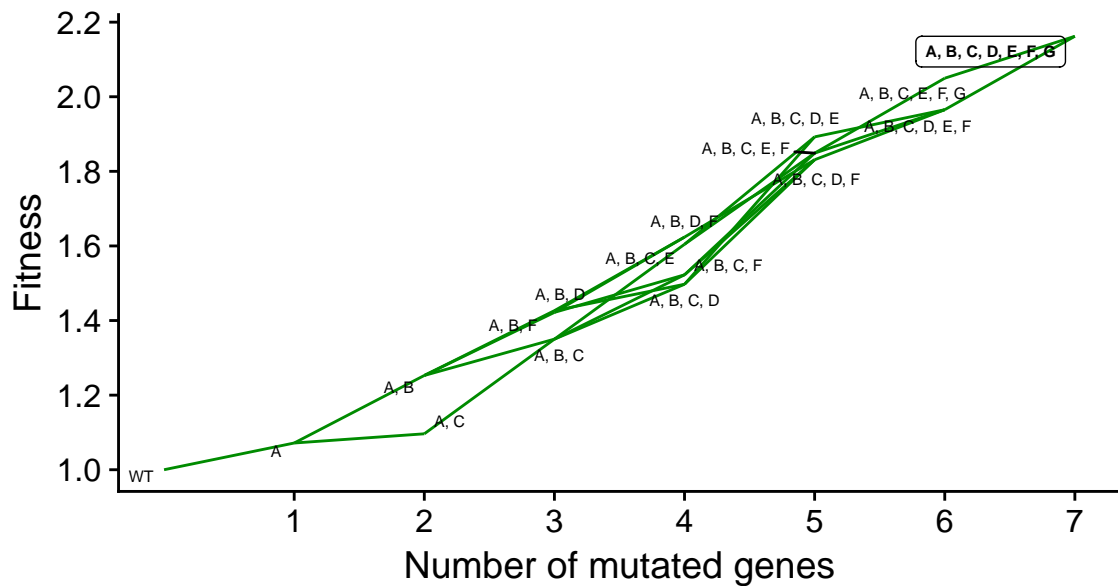

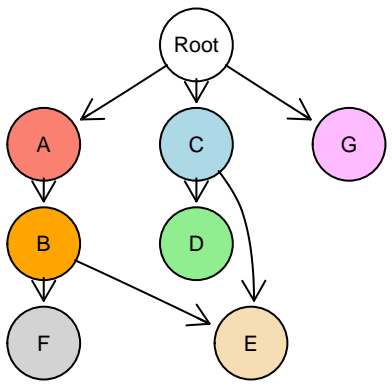

*ID* zy1cmG2IWriY25OZ  
*acc genotypes* 32  
*peaks no back* 1  
*removed edges* 0  
*prop rem edges* 0

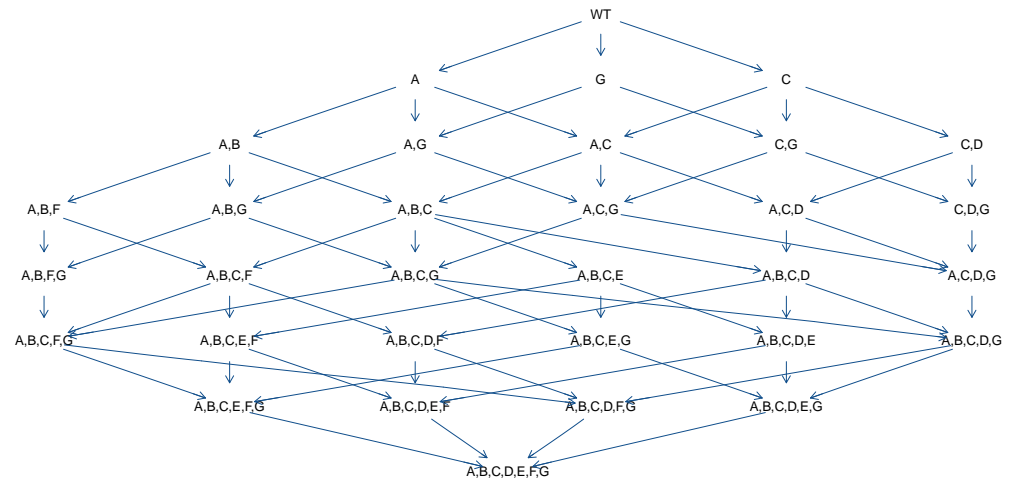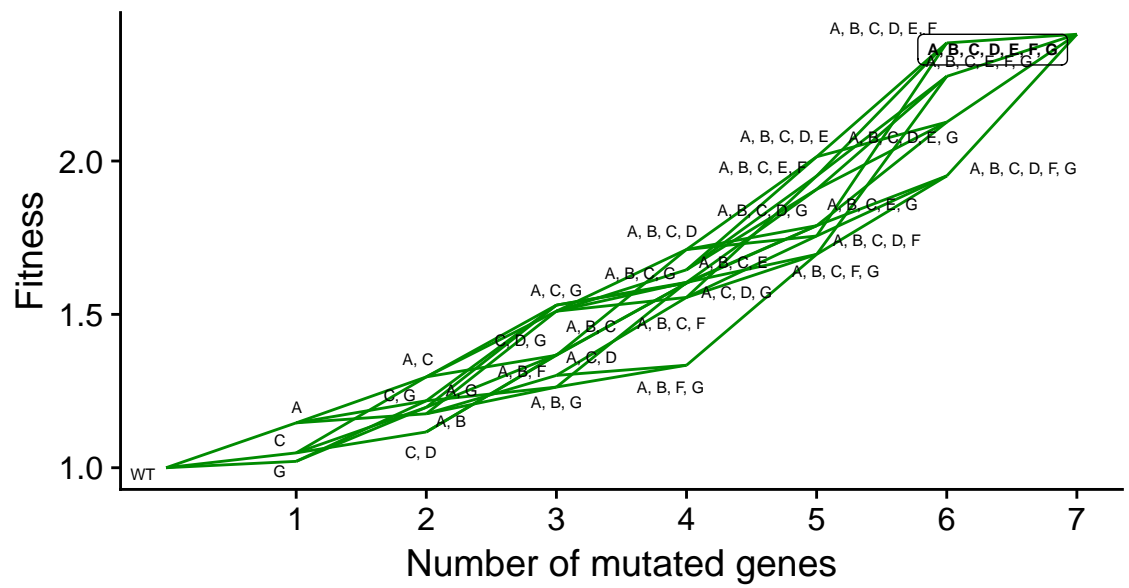

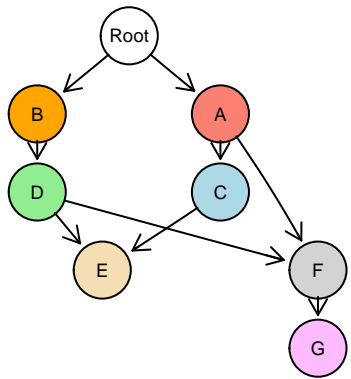

ID **10cxjmXXiW5qEyv73**  
 acc genotypes **16**  
 peaks no back **3**  
 removed edges **2**  
 prop rem edges **0.087**

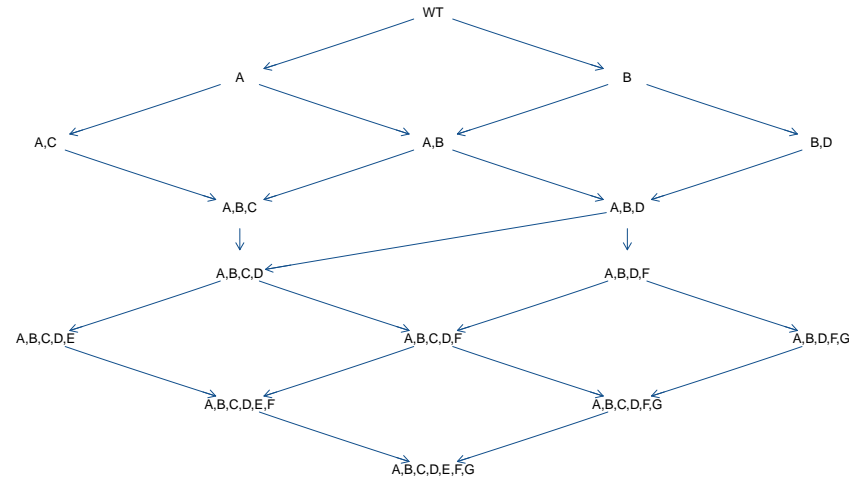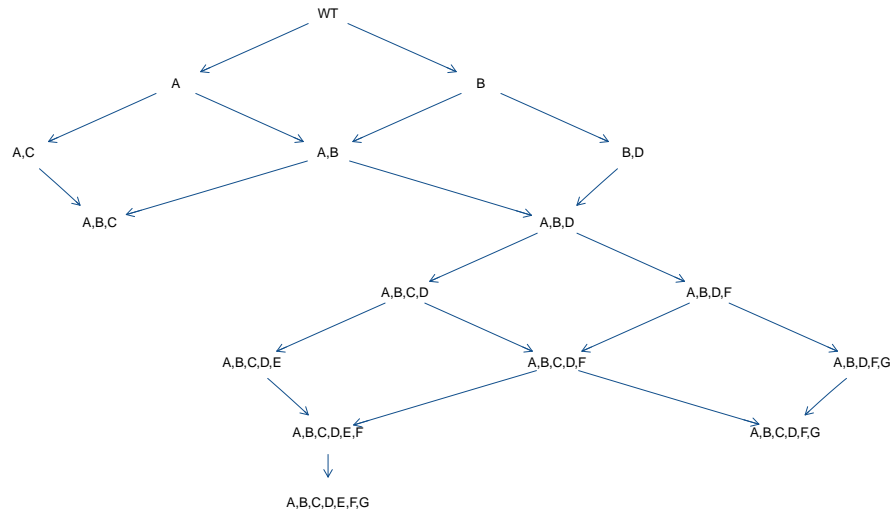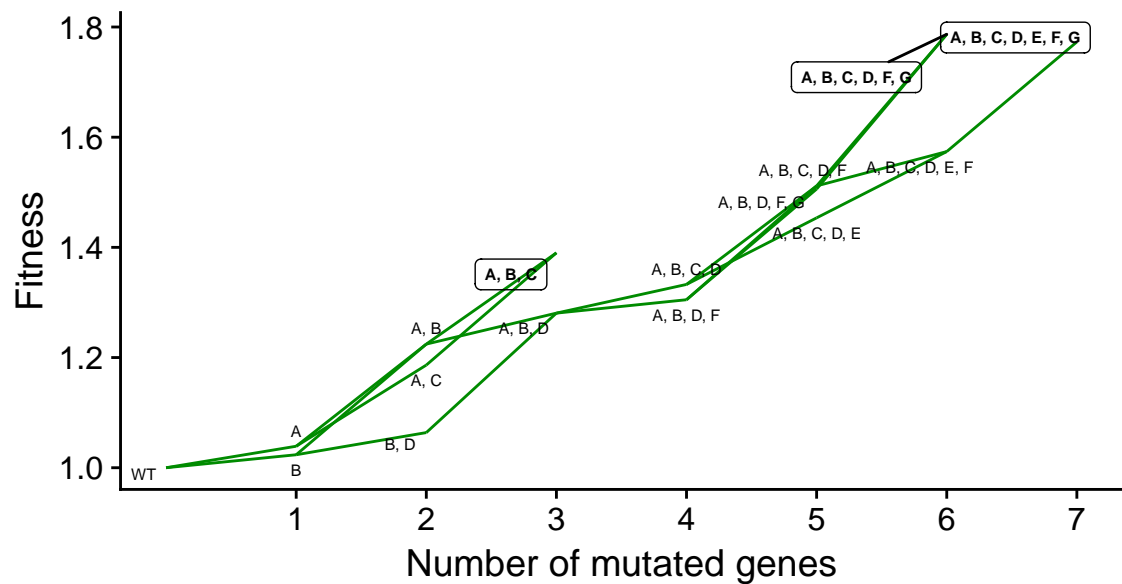

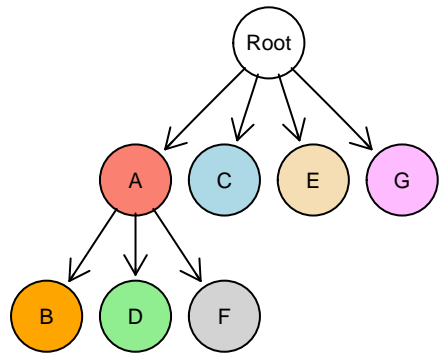

*ID* 1QsHDEe4ASsHeCxX  
*acc genotypes* 72  
*peaks no back* 9  
*removed edges* 27  
*prop rem edges* 0.127

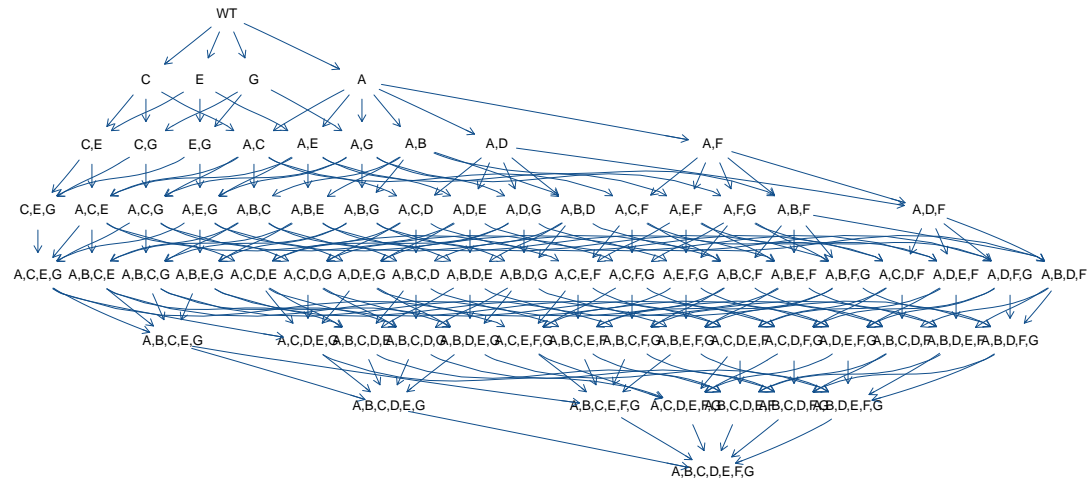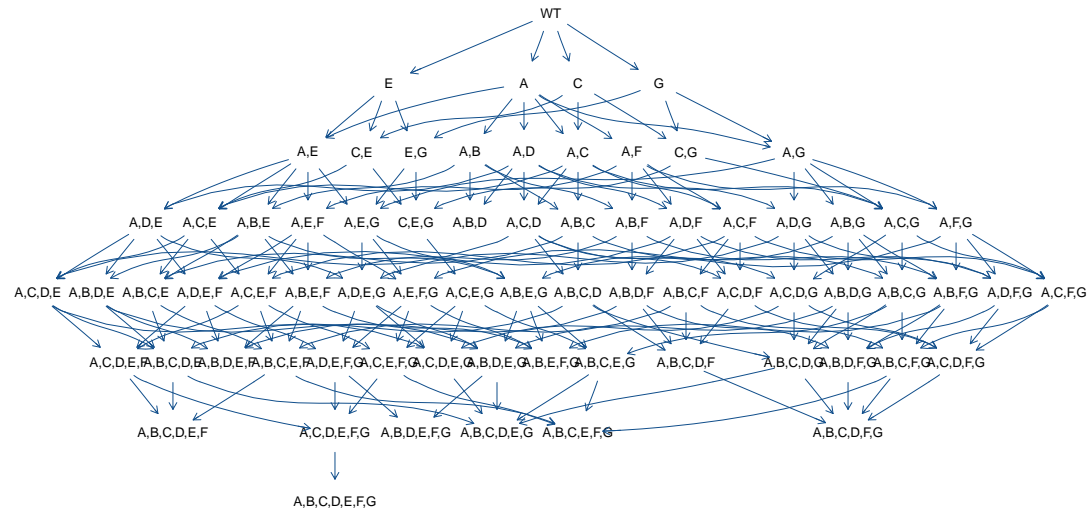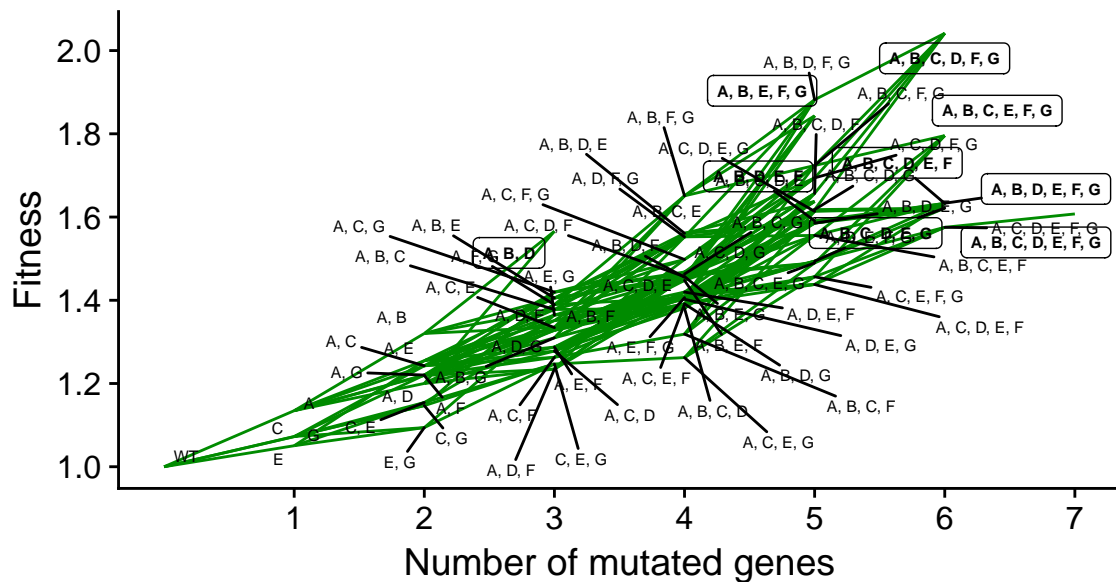

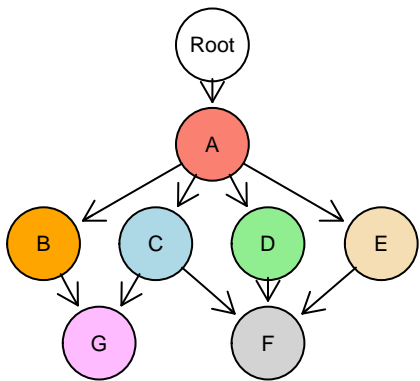

ID **2hKTyl9dwrqbrkDP**  
 acc genotypes **24**  
 peaks no back **4**  
 removed edges **8**  
 prop rem edges **0.174**

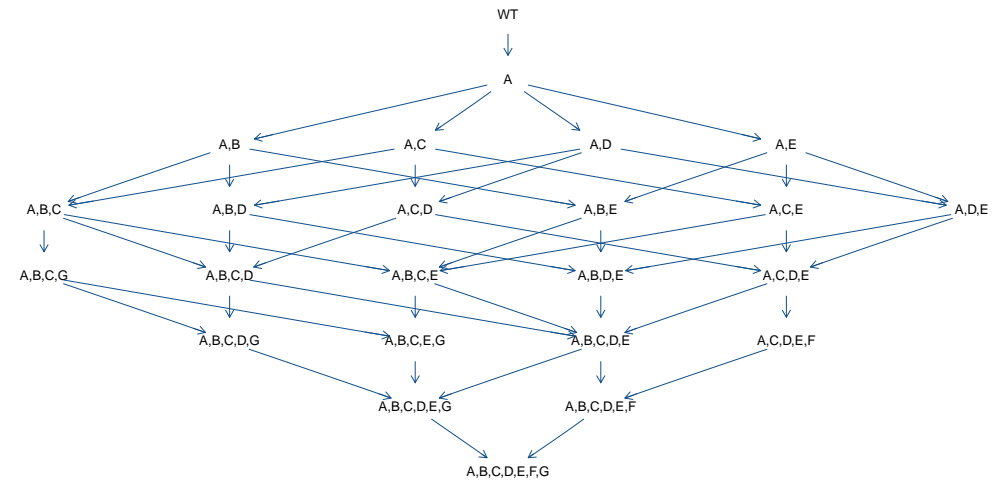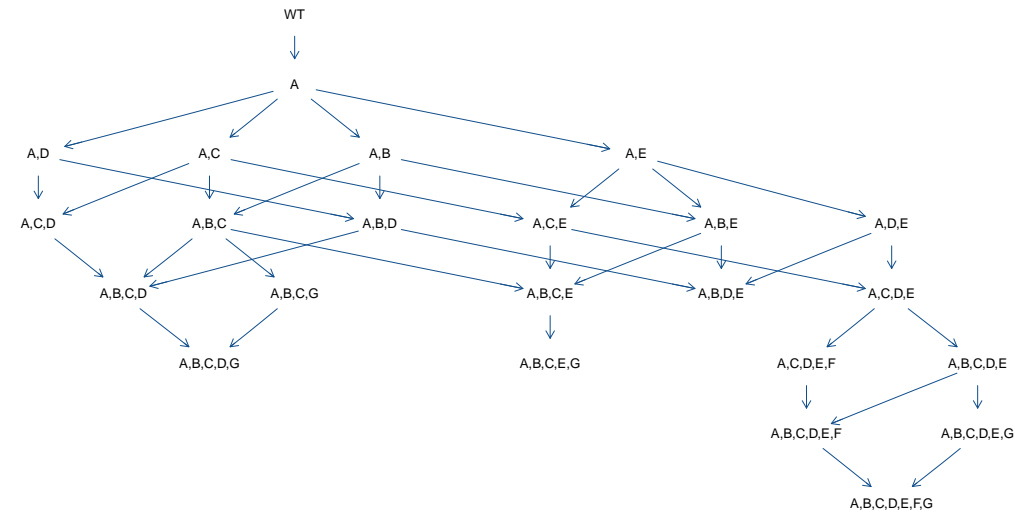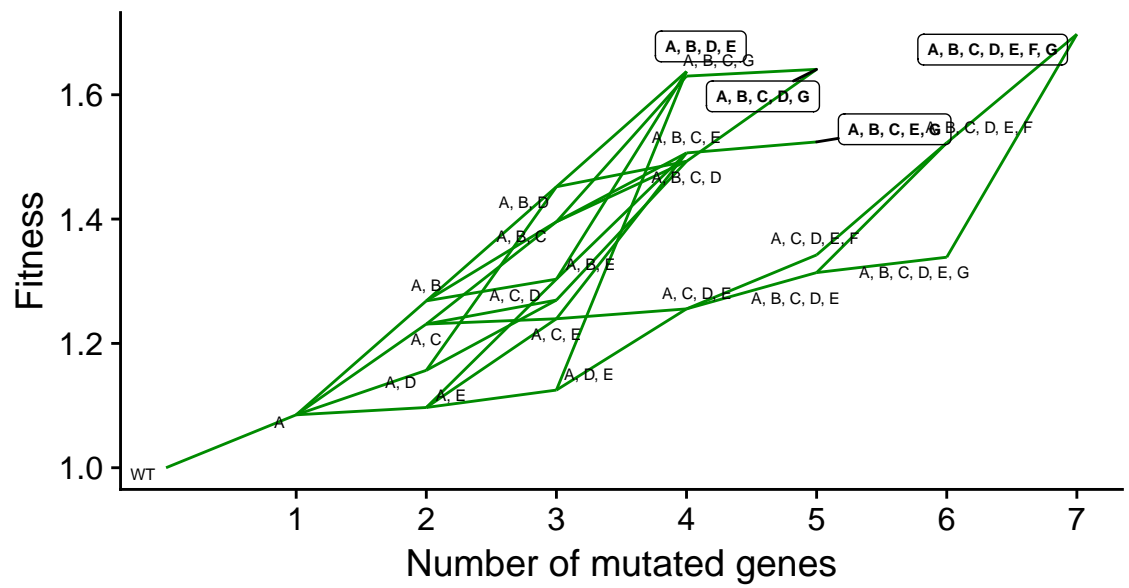

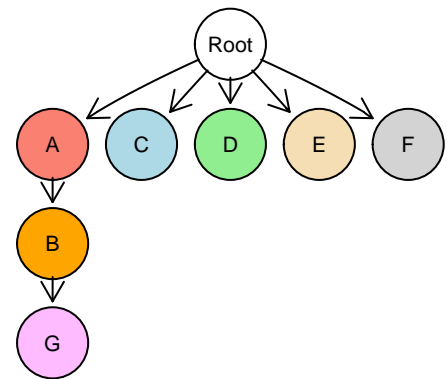

ID 3F1PDe5foEoGbGug  
 acc genotypes 64  
 peaks no back 9  
 removed edges 31  
 prop rem edges 0.176

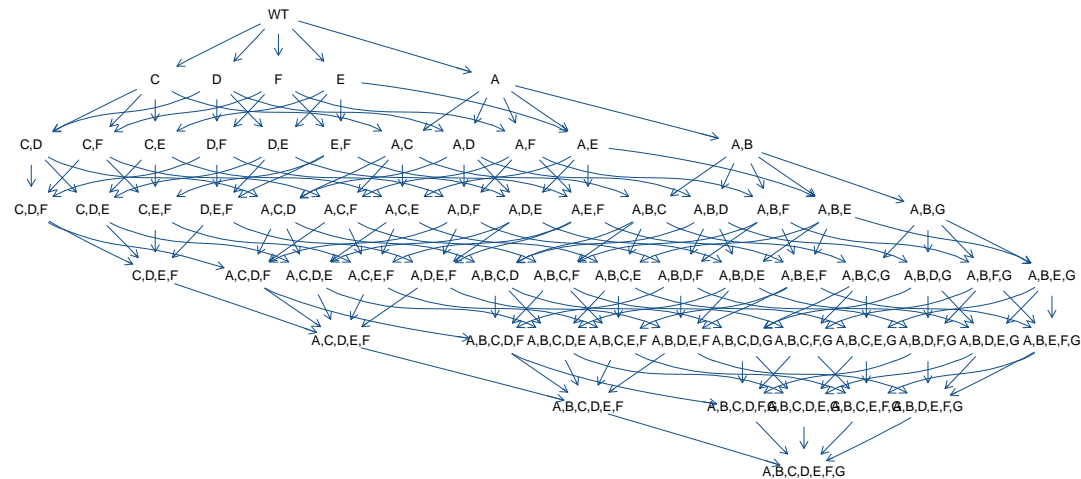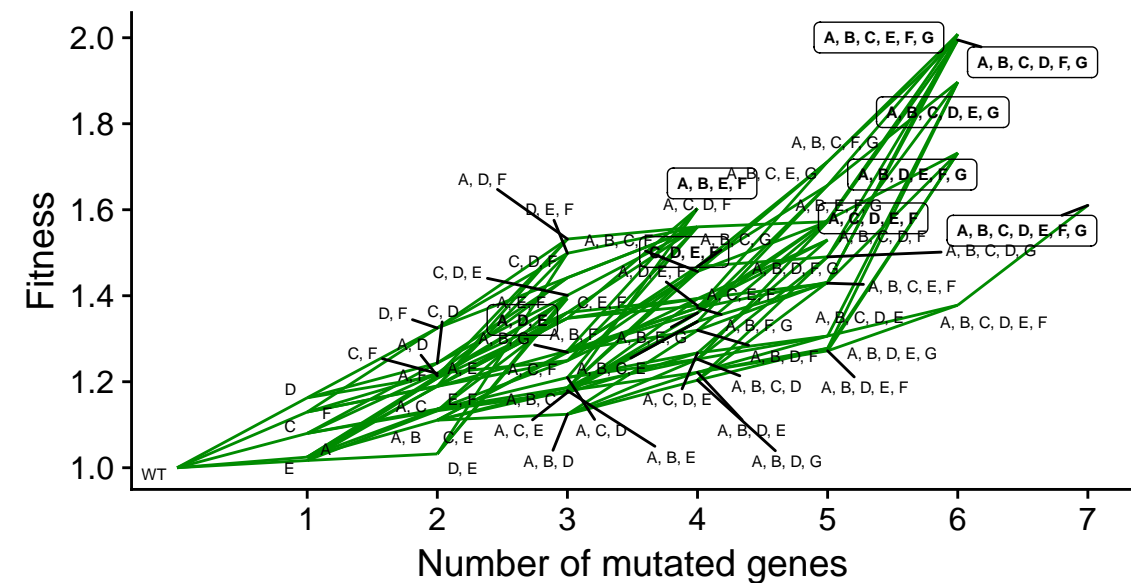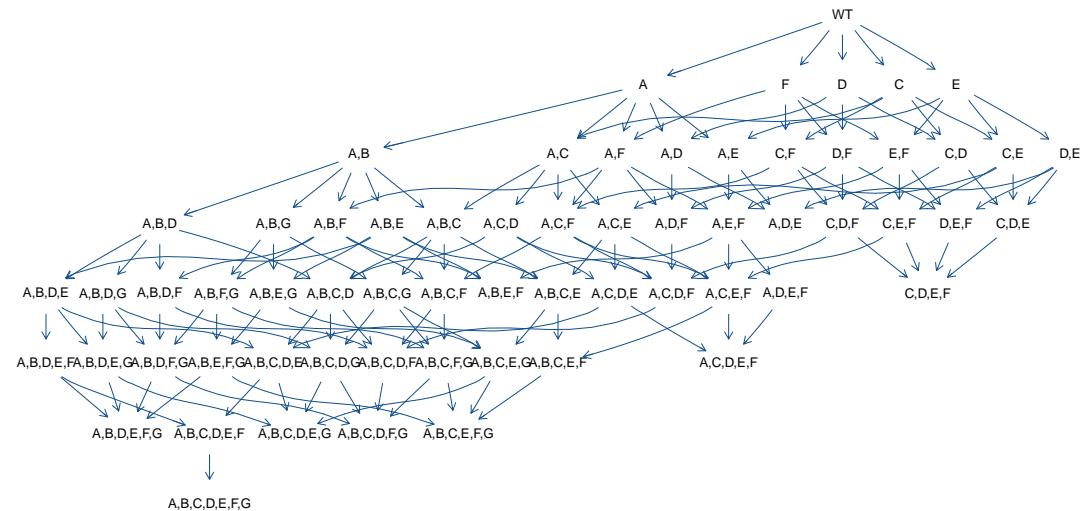

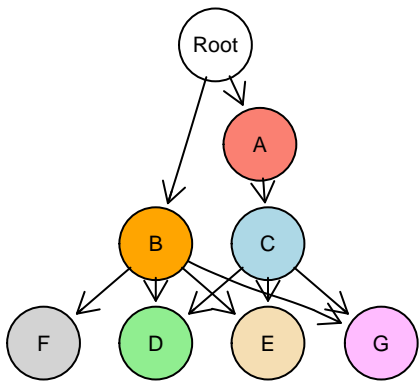

ID 3HeBeujvSFoM1FDd  
 acc genotypes 23  
 peaks no back 5  
 removed edges 7  
 prop rem edges 0.163

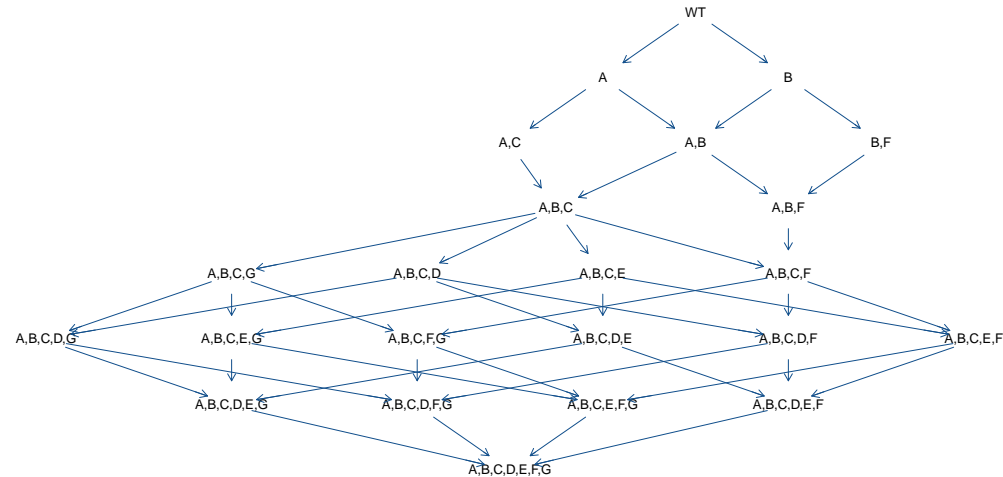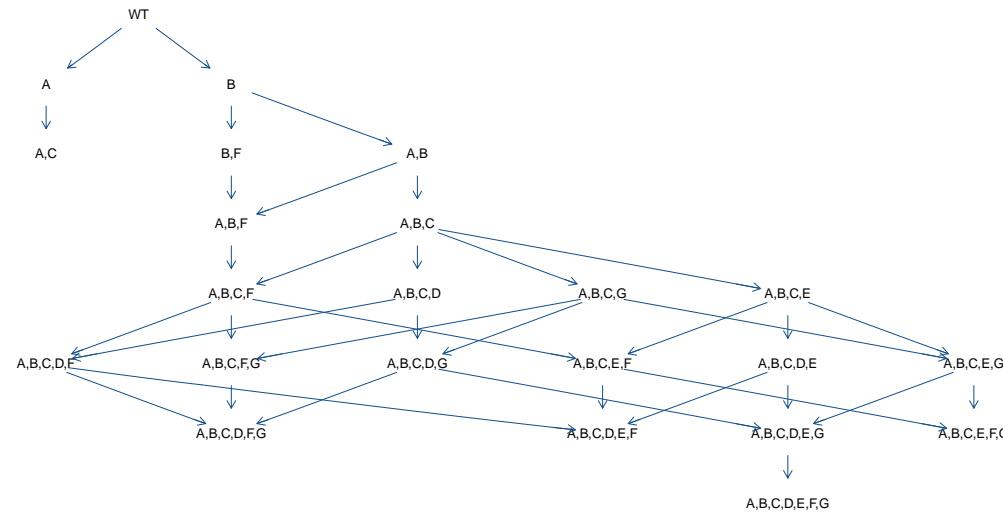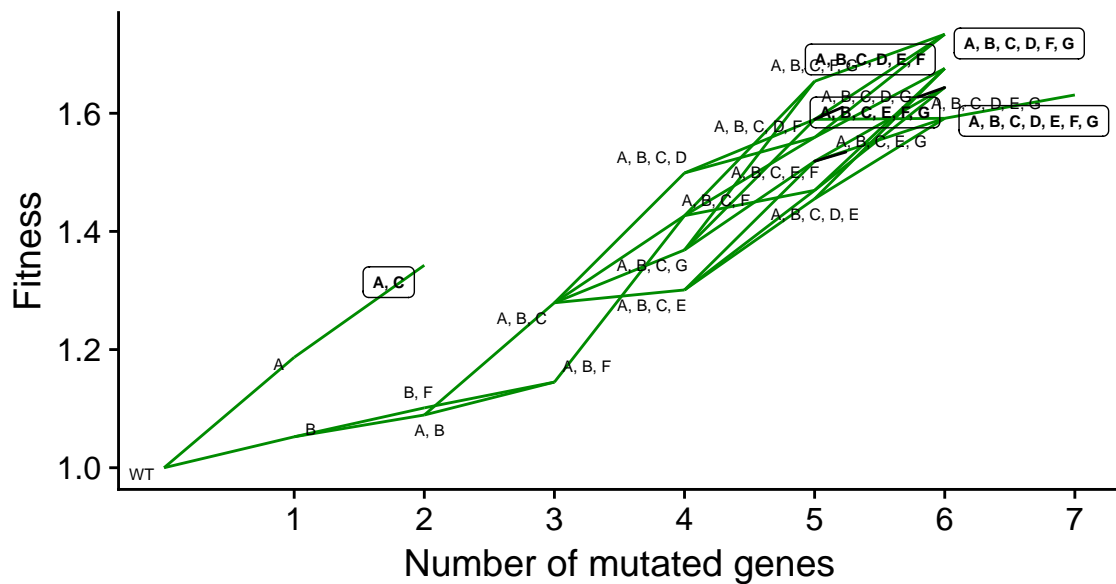

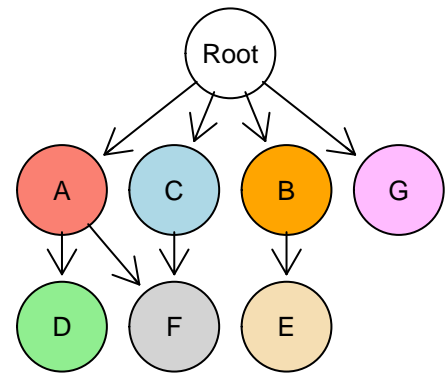

ID 3zLLGRM6bZ1renKV  
 acc genotypes 48  
 peaks no back 7  
 removed edges 25  
 prop rem edges 0.216

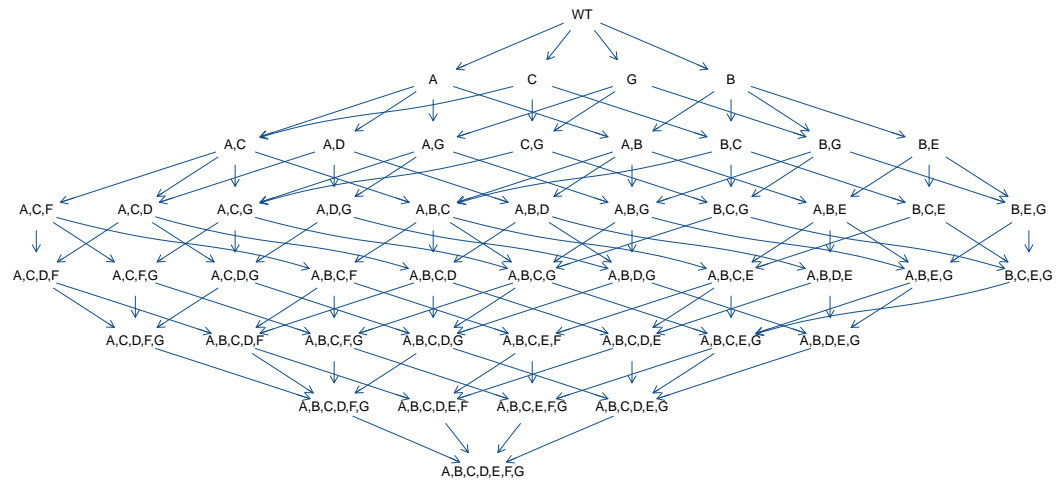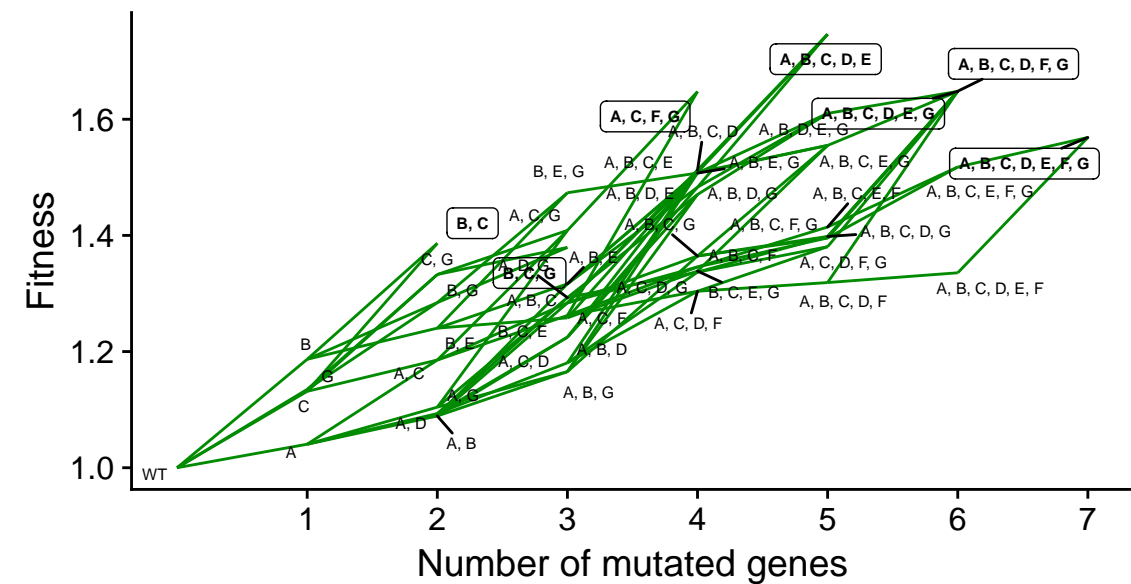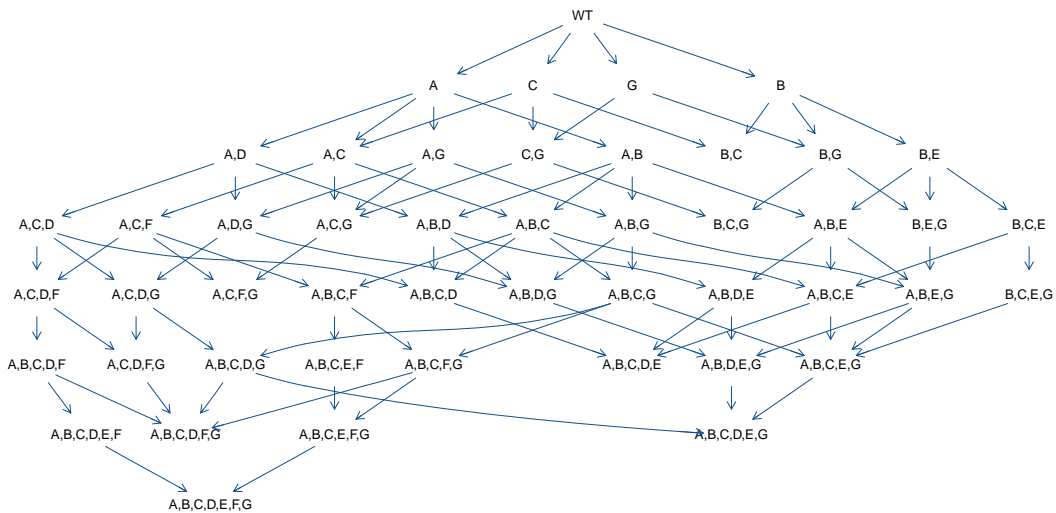



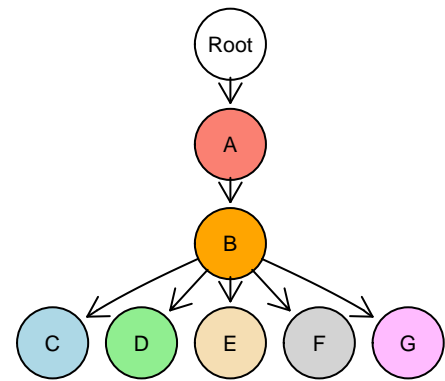

ID 410cr63nve1pNTOmC  
 acc genotypes 34  
 peaks no back 5  
 removed edges 5  
 prop rem edges 0.061

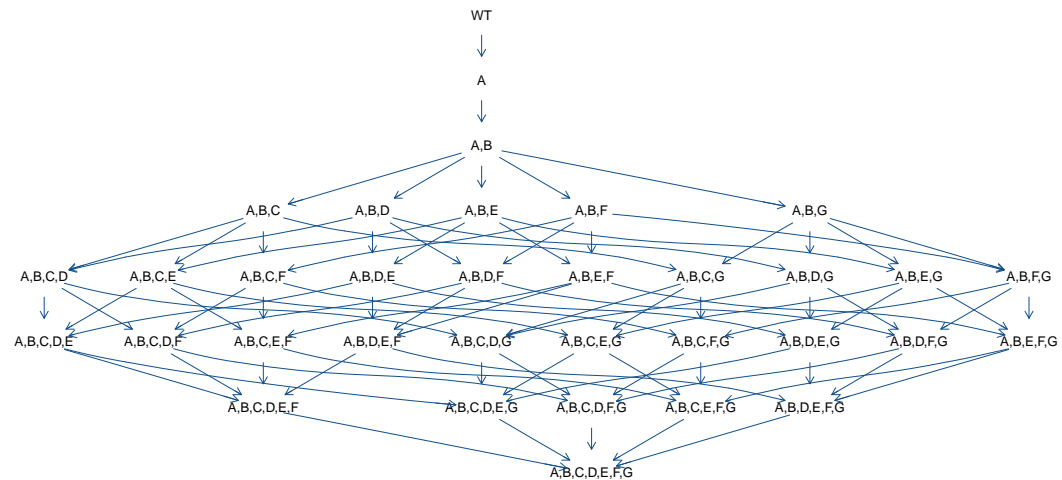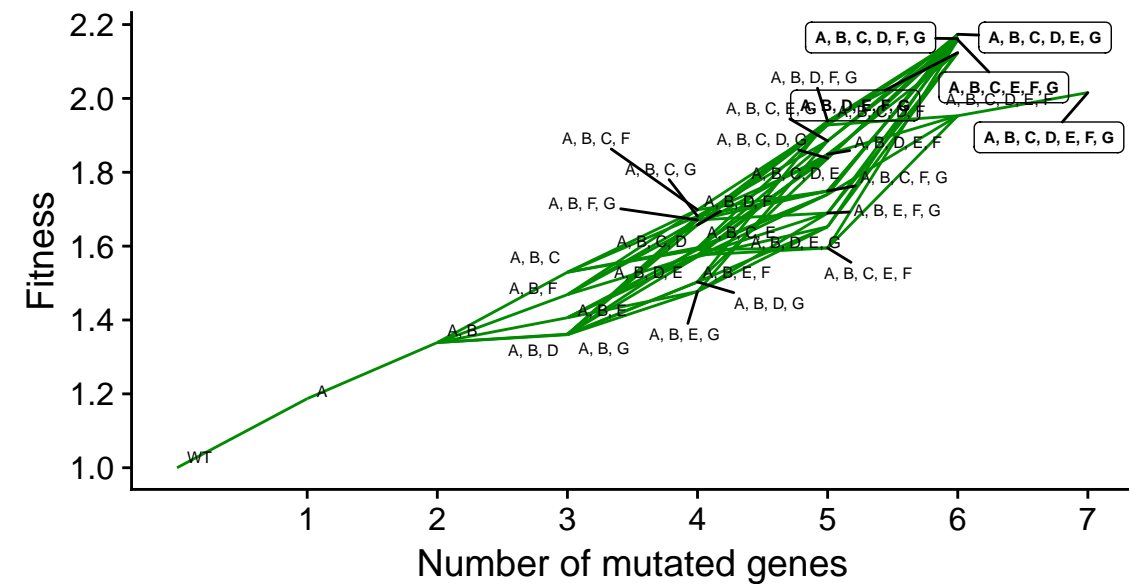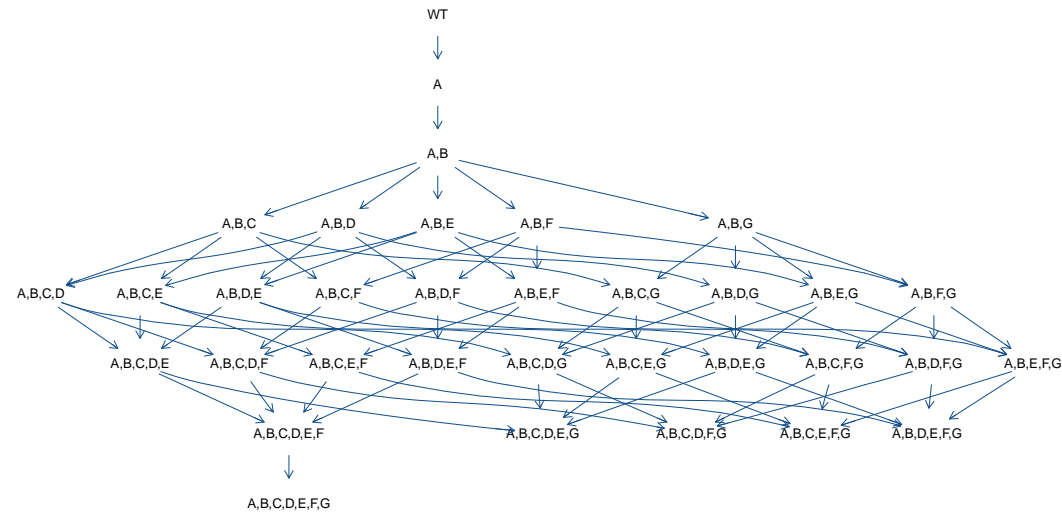



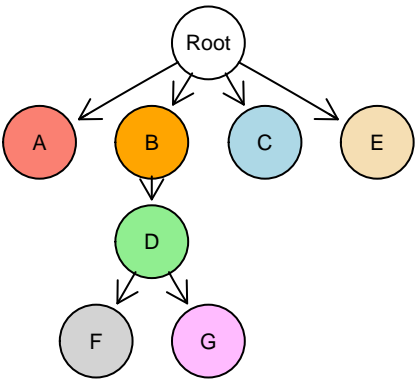

ID **4KzuP1MMEwOUSyml**  
 acc genotypes **48**  
 peaks no back **10**  
 removed edges **26**  
 prop rem edges **0.217**

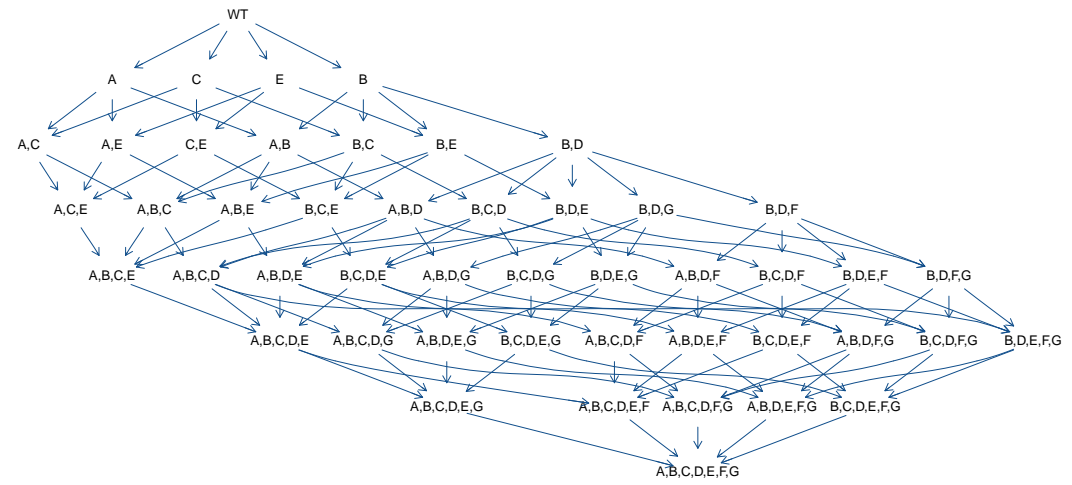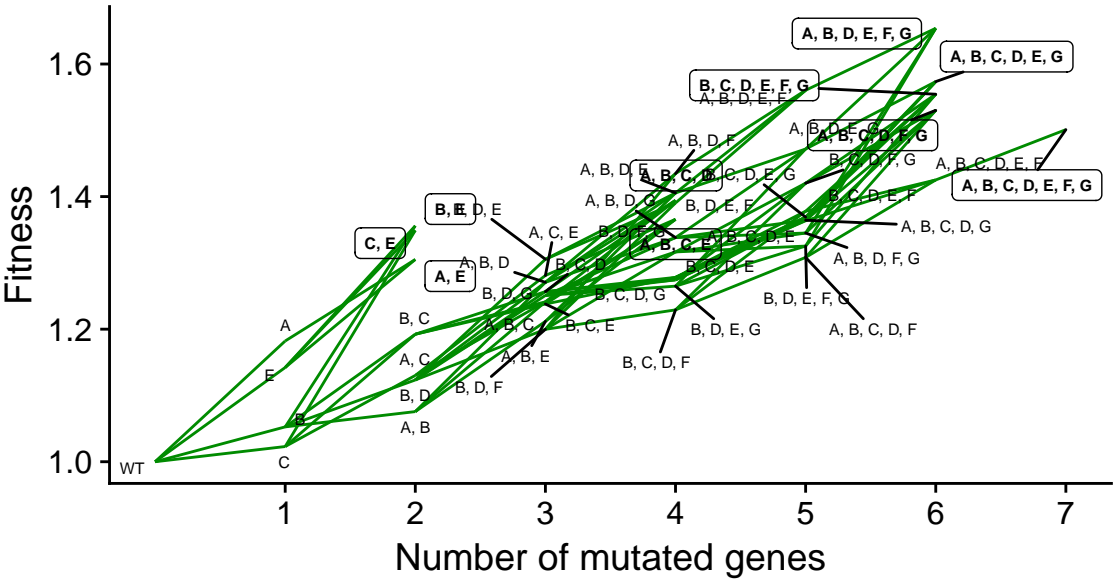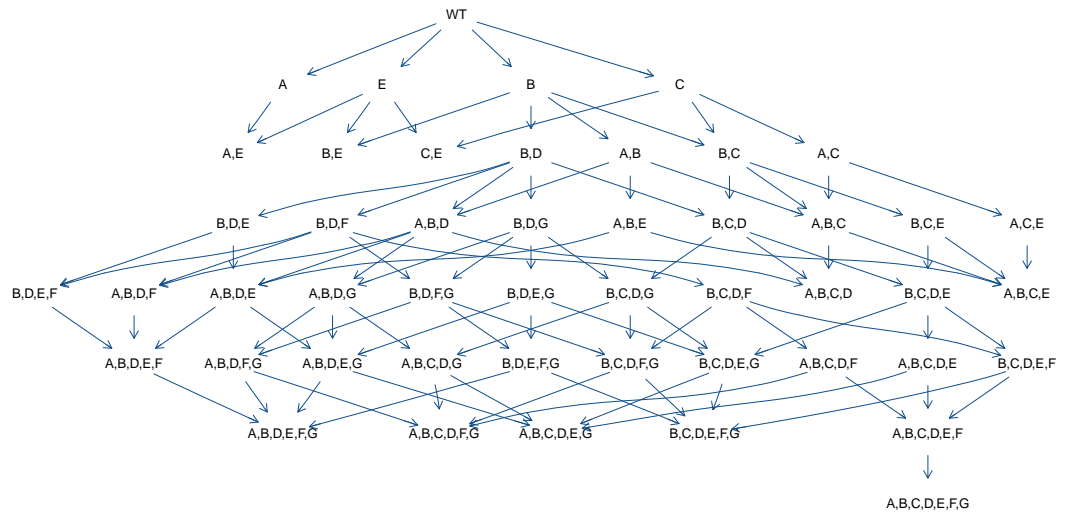

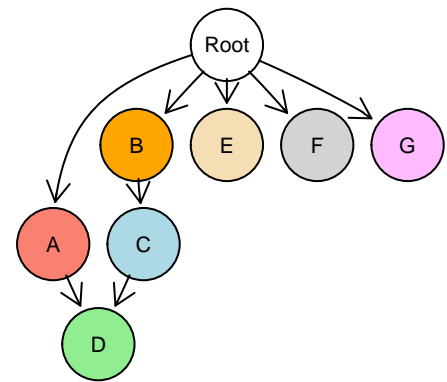

ID **4uRd77KBIQ1QZeh9**  
 acc genotypes **56**  
 peaks no back **9**  
 removed edges **36**  
 prop rem edges **0.243**

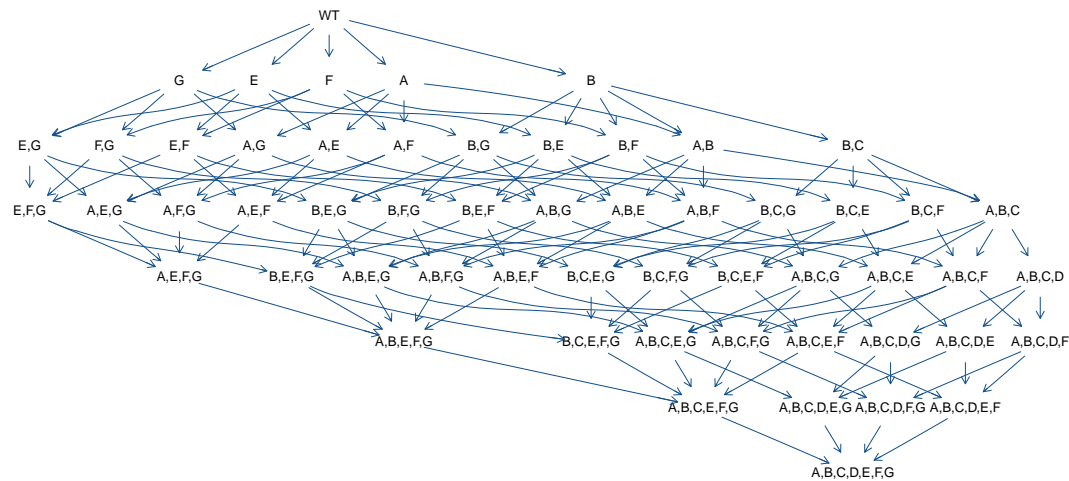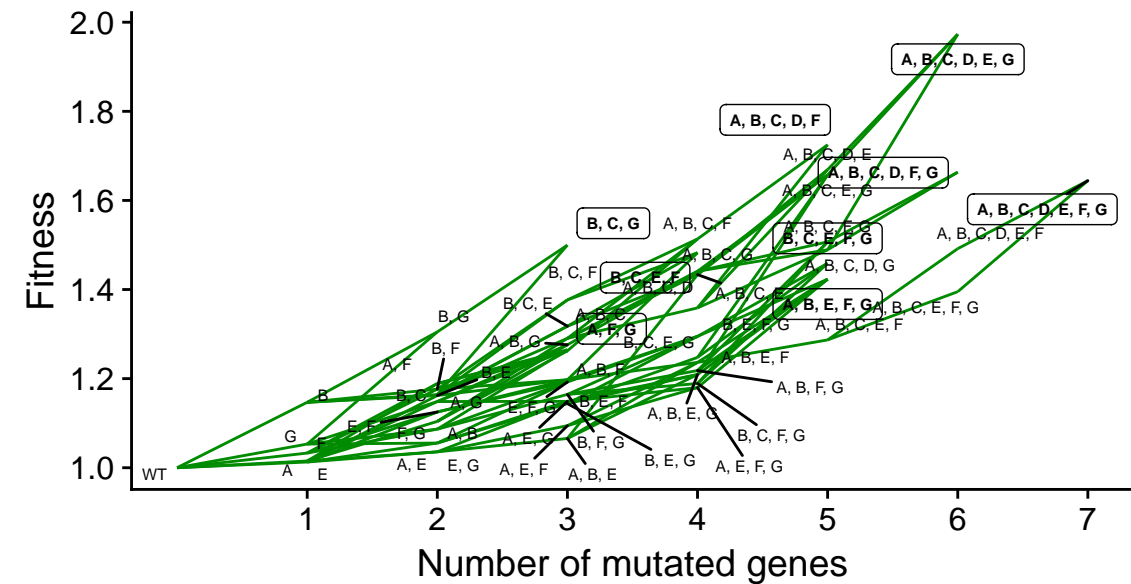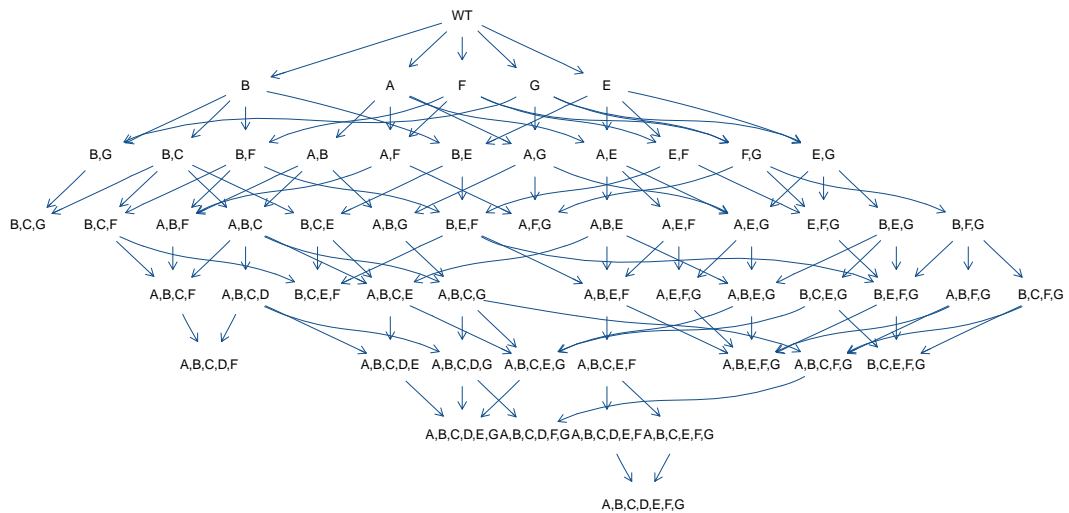

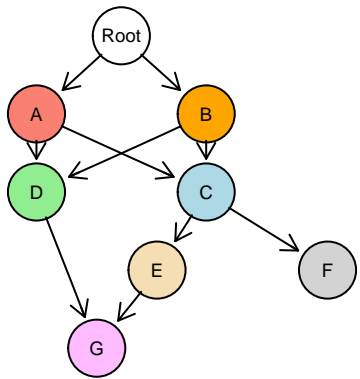

ID 4xM3Wofst2xw10jJ6  
 acc genotypes 15  
 peaks no back 2  
 removed edges 2  
 prop rem edges 0.091

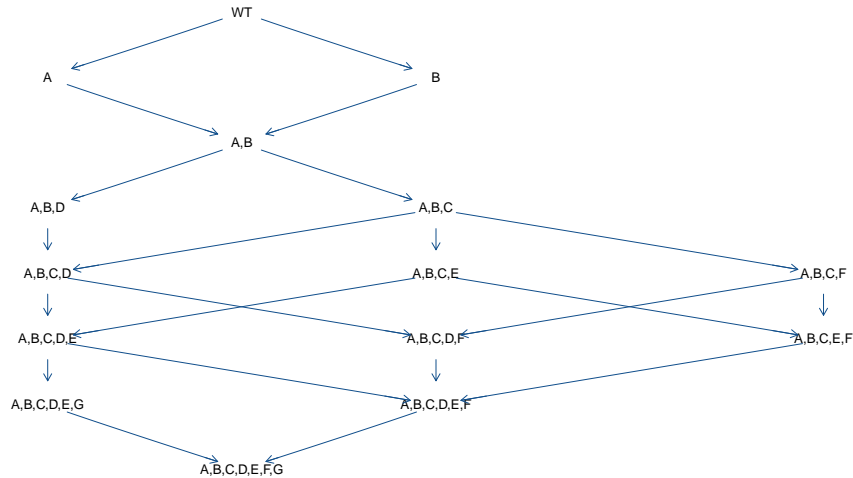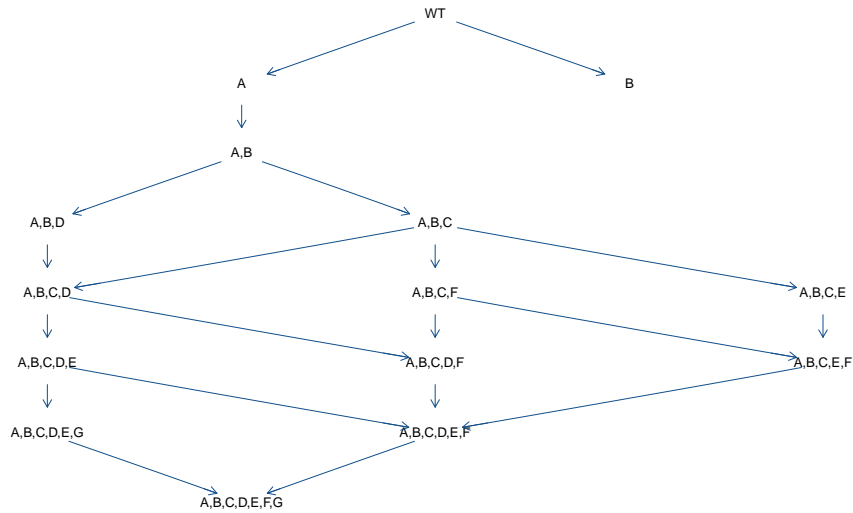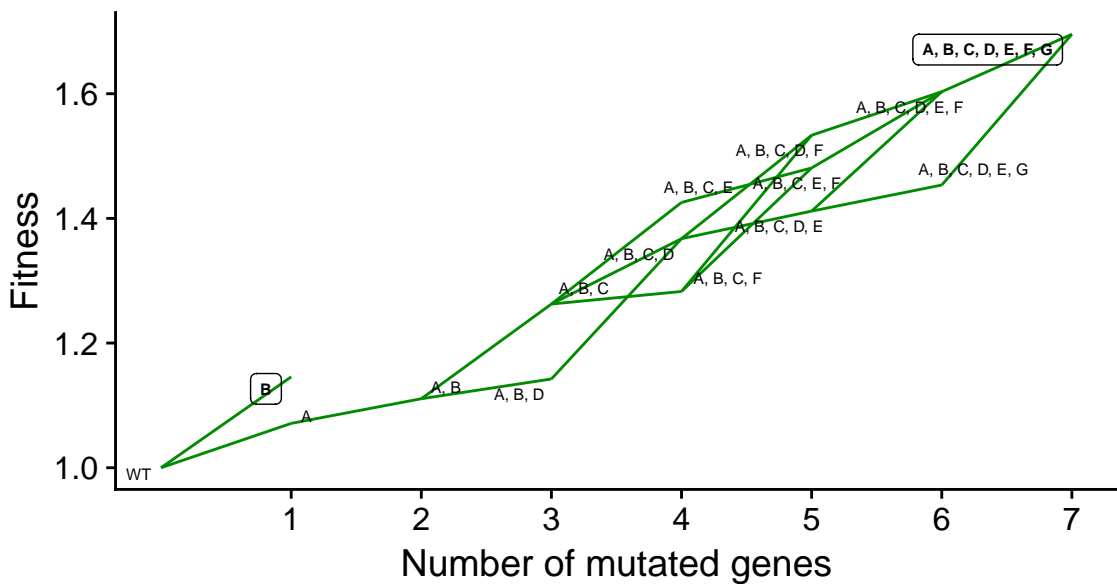

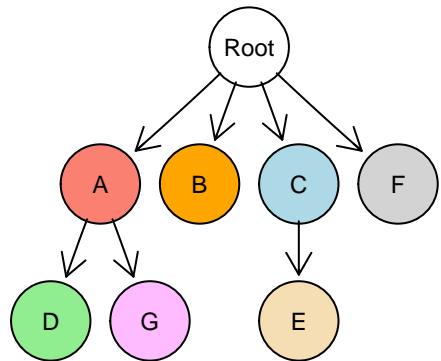

ID 4YkXkc14paEyTomW  
 acc genotypes 60  
 peaks no back 8  
 removed edges 28  
 prop rem edges 0.175

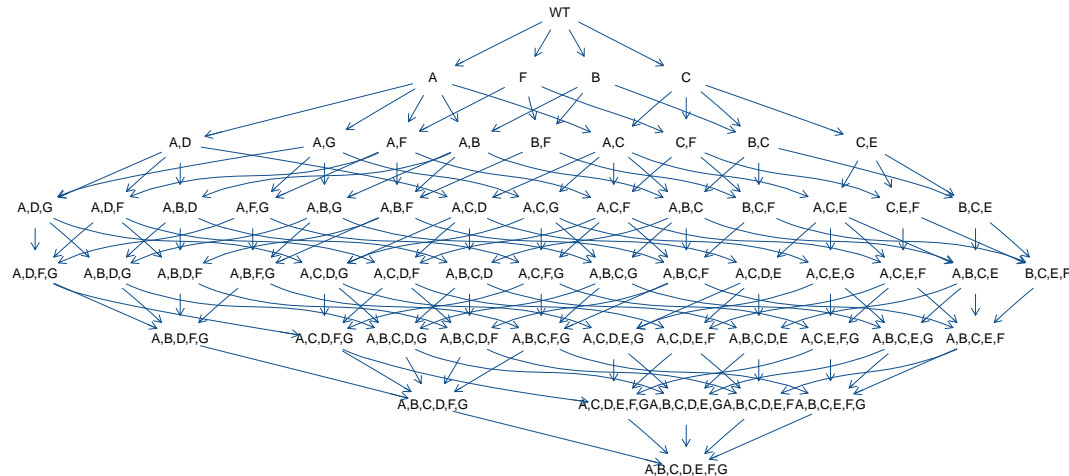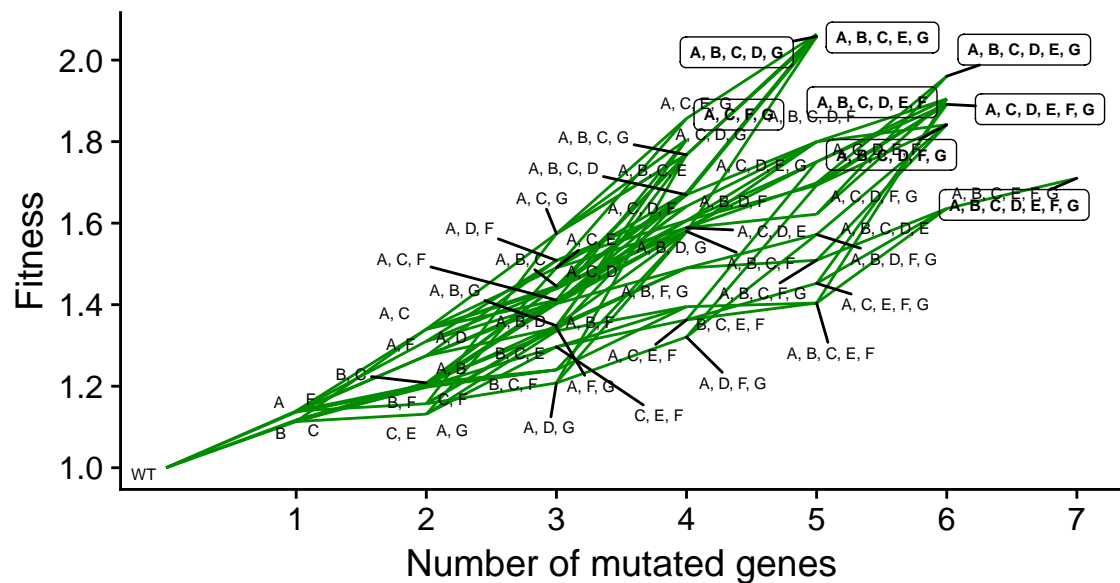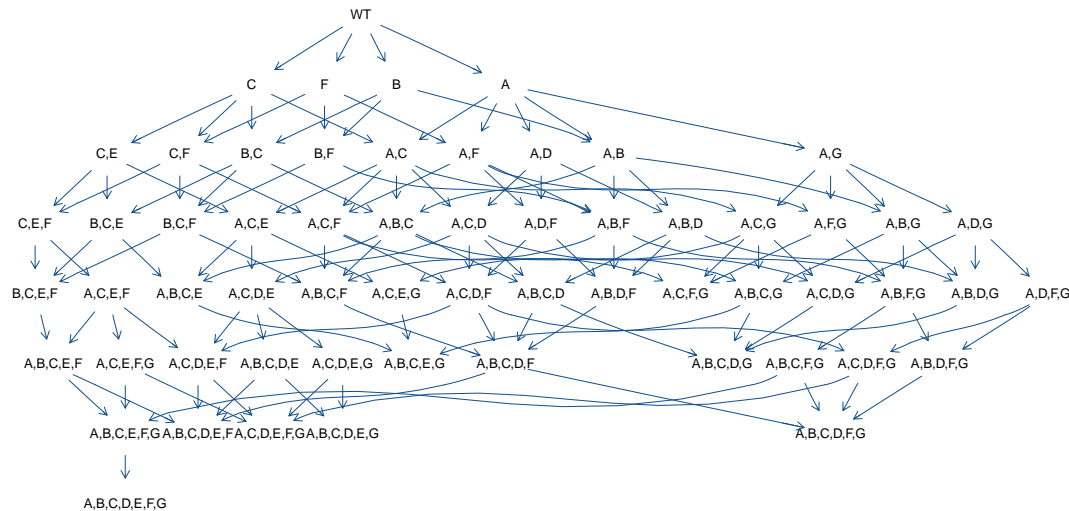

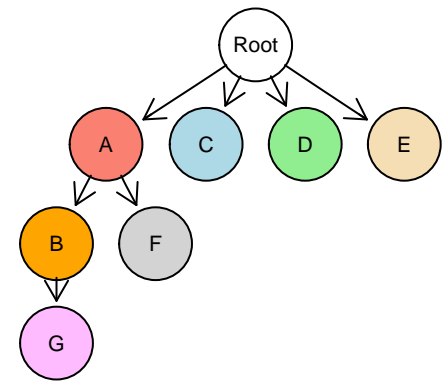

*ID* 5cLLbdWPenssPhaD  
*acc genotypes* 56  
*peaks no back* 7  
*removed edges* 20  
*prop rem edges* 0.135

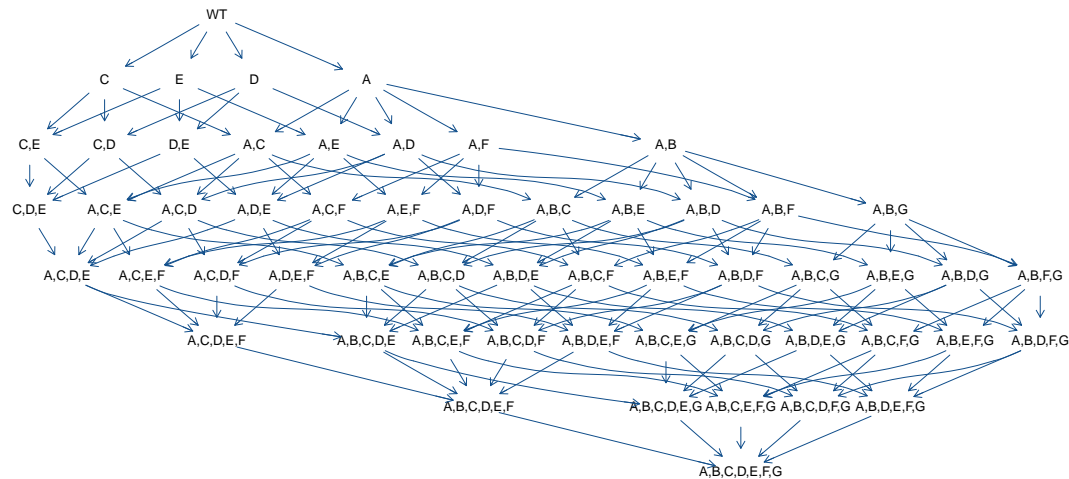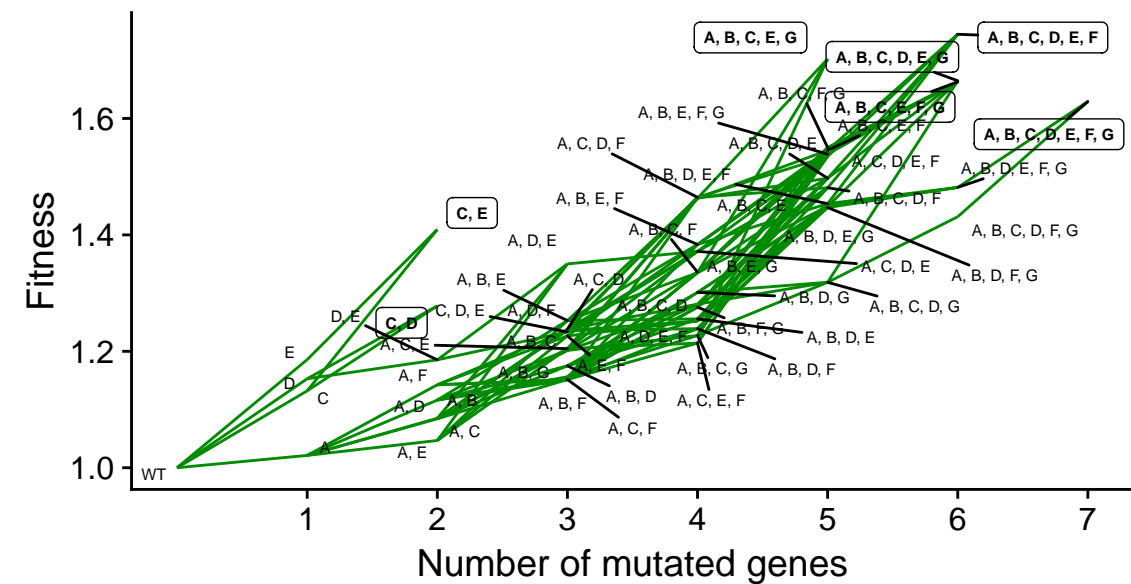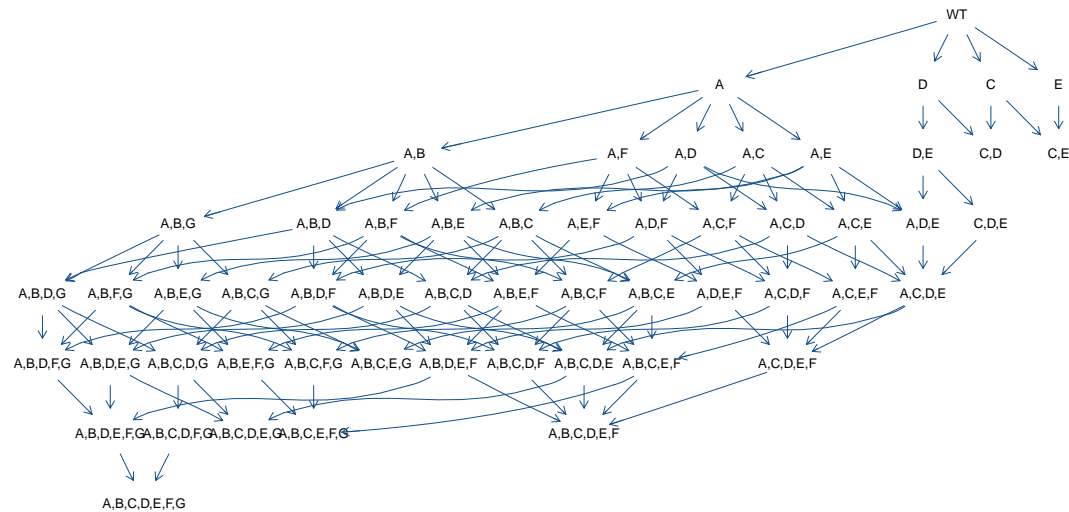

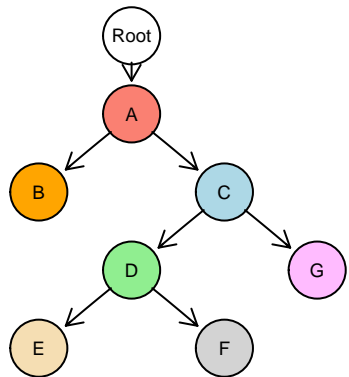

ID **5E16S7TMXAPy65pq**  
 acc genotypes **23**  
 peaks no back **2**  
 removed edges **3**  
 prop rem edges **0.068**

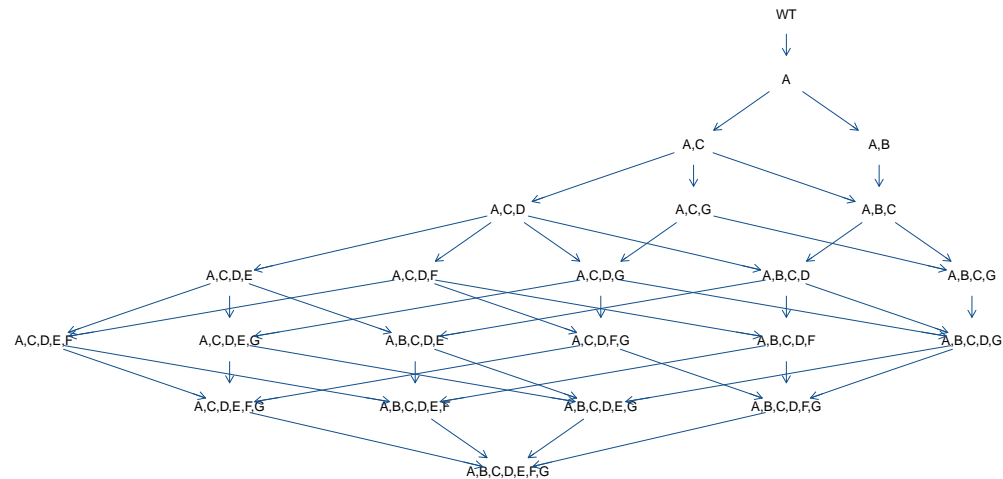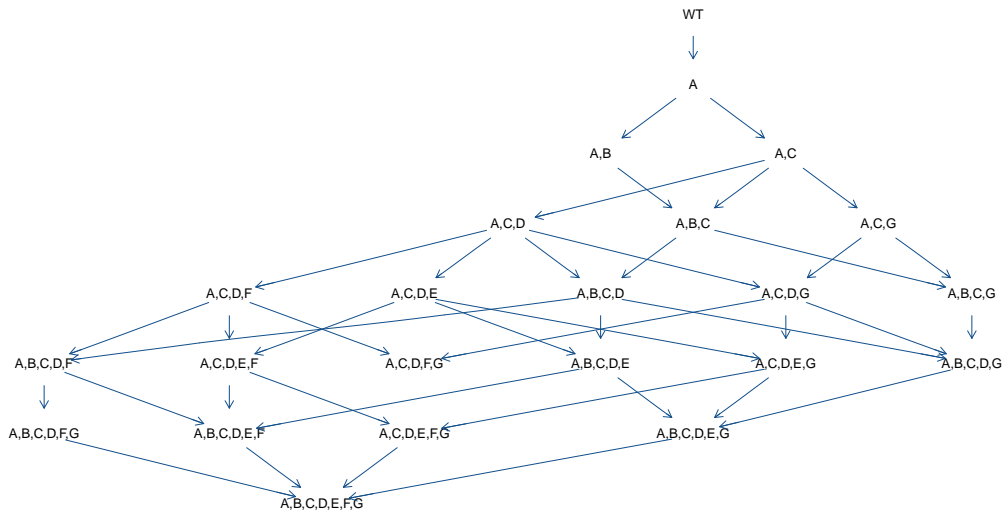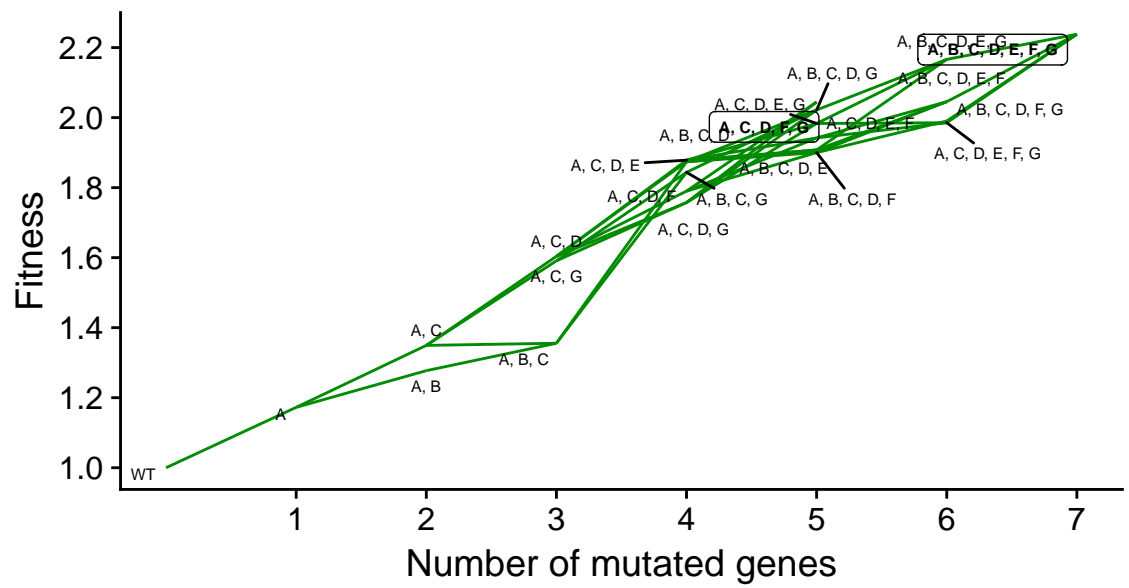



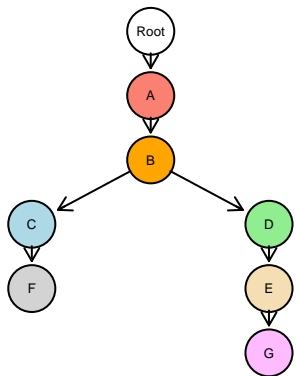

ID **5gEdOQwKmmjGCuwA**  
 acc genotypes **14**  
 peaks no back **3**  
 removed edges **4**  
 prop rem edges **0.211**

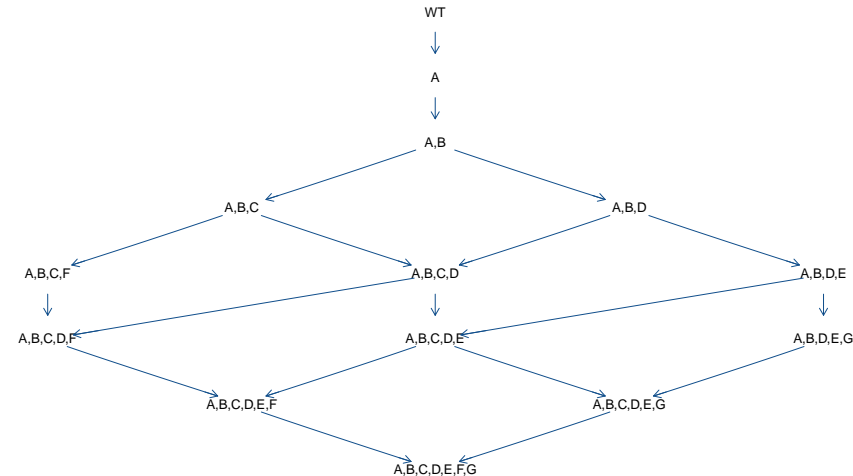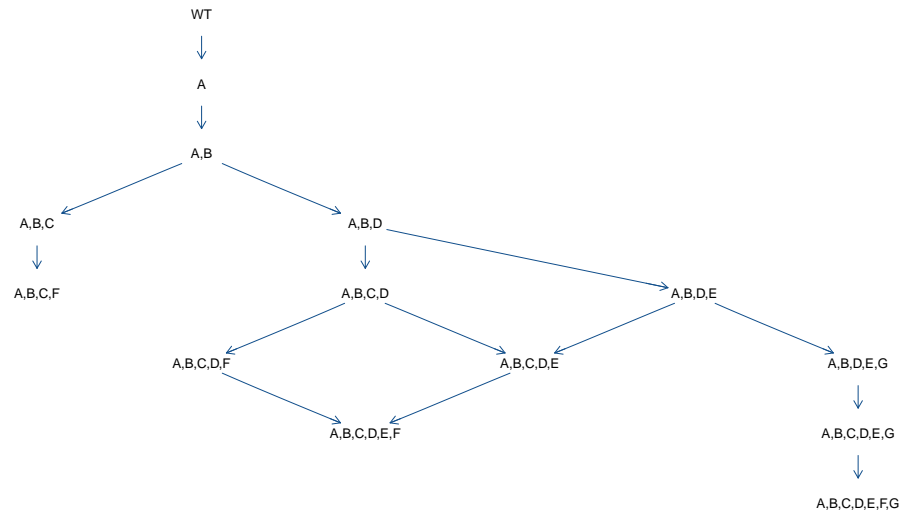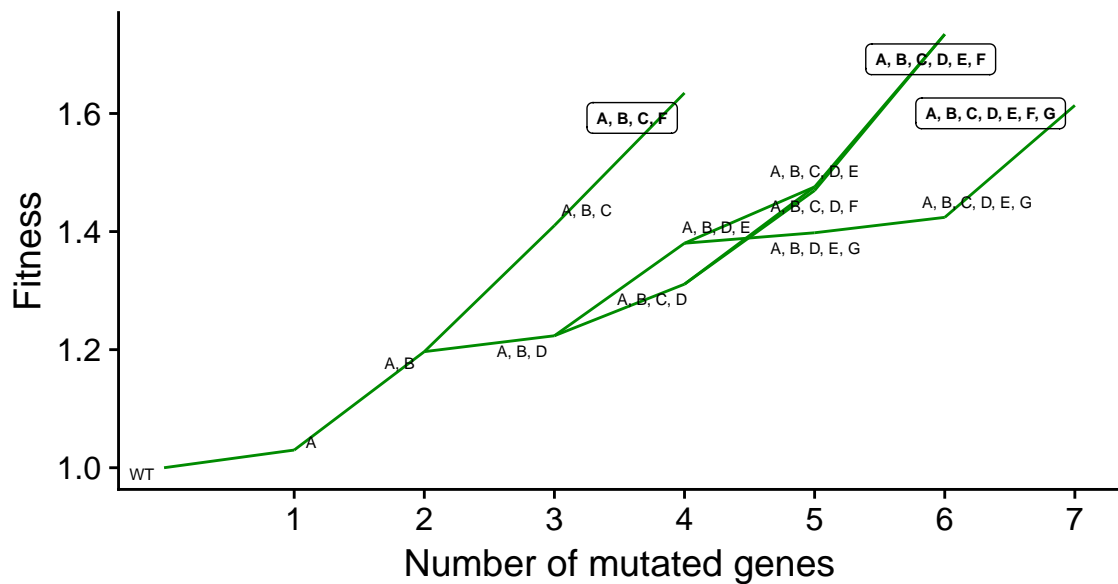



ID **5kZqKEOHzi10BWV78**  
 acc genotypes **48**  
 peaks no back **7**  
 removed edges **16**  
 prop rem edges **0.138**

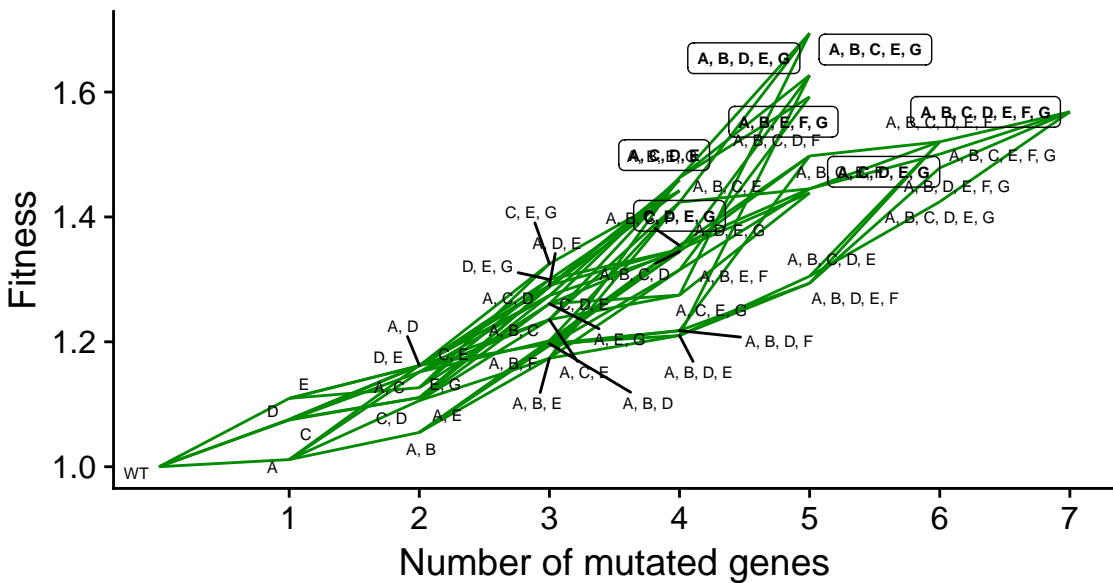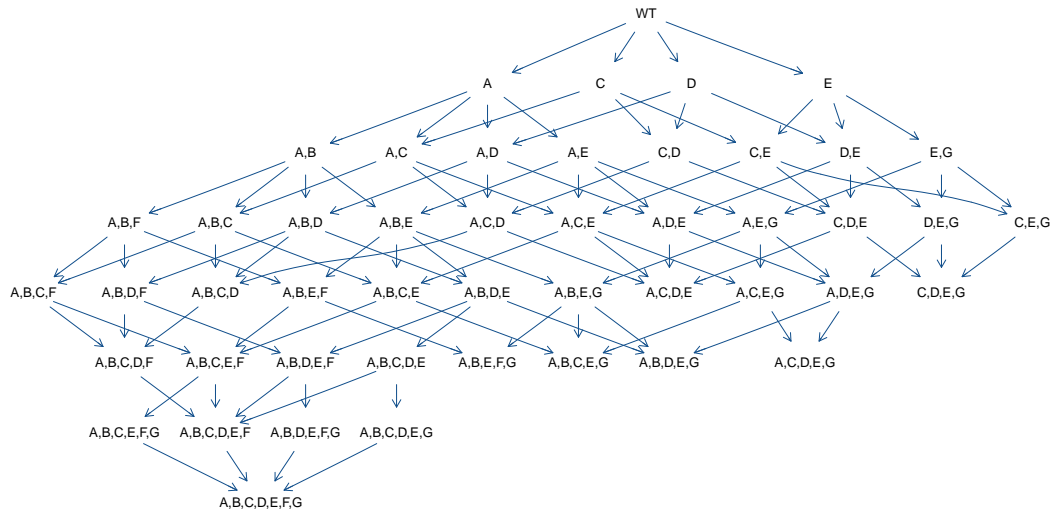



ID **6h4QpMCcKm22zn5f**  
 acc genotypes **52**  
 peaks no back **9**  
 removed edges **31**  
 prop rem edges **0.235**

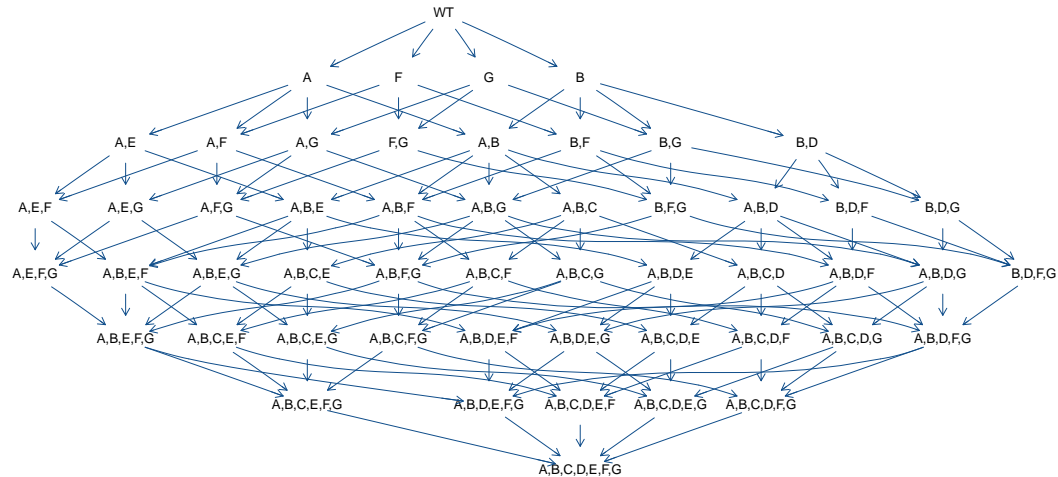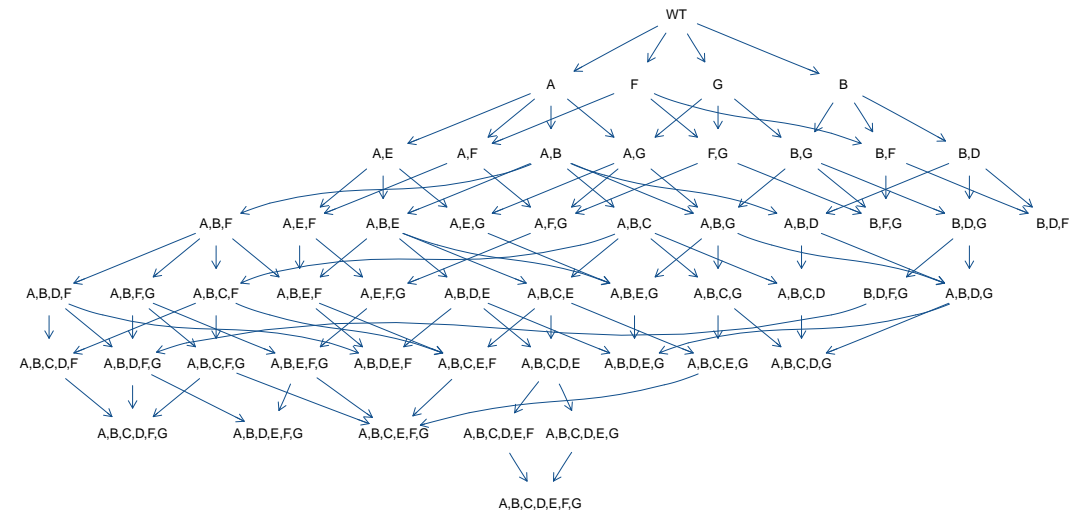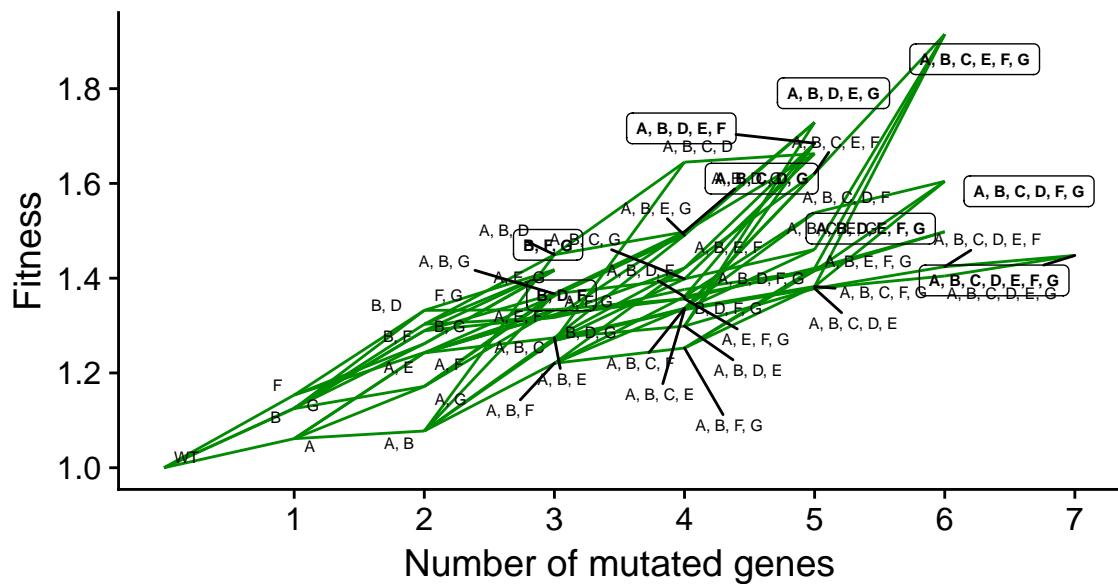

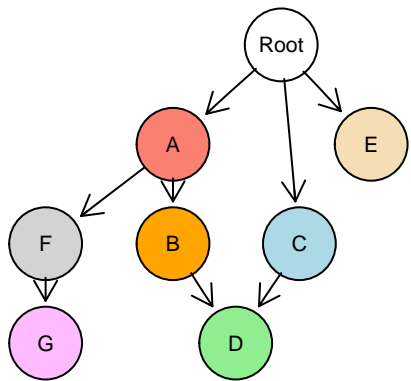

ID **6Hn6i2YqHUFLoALB**  
 acc genotypes **34**  
 peaks no back **5**  
 removed edges **15**  
 prop rem edges **0.205**

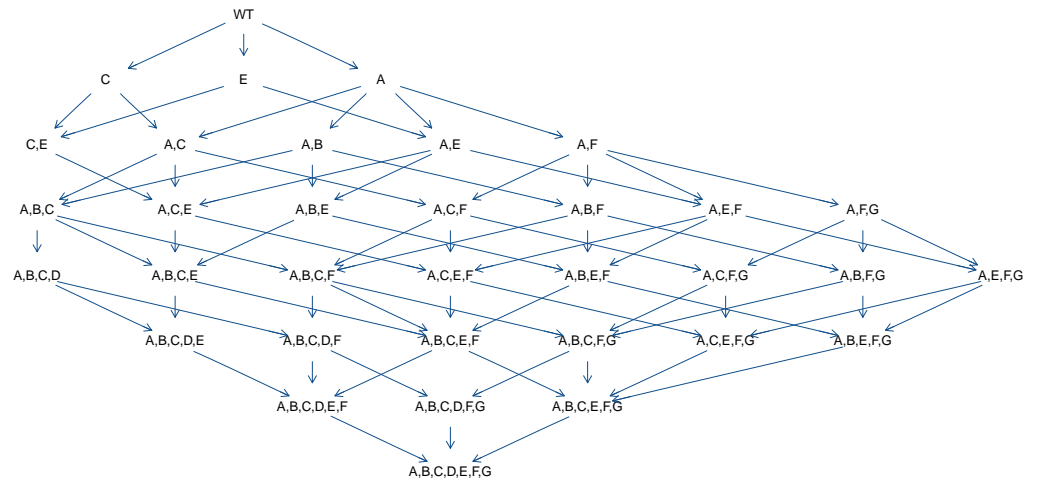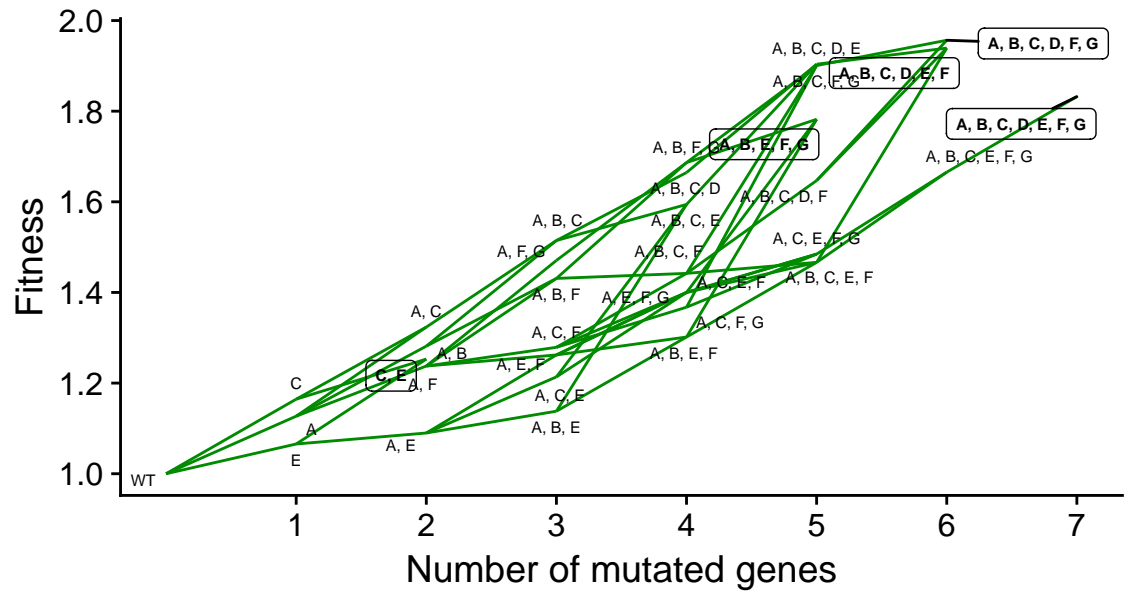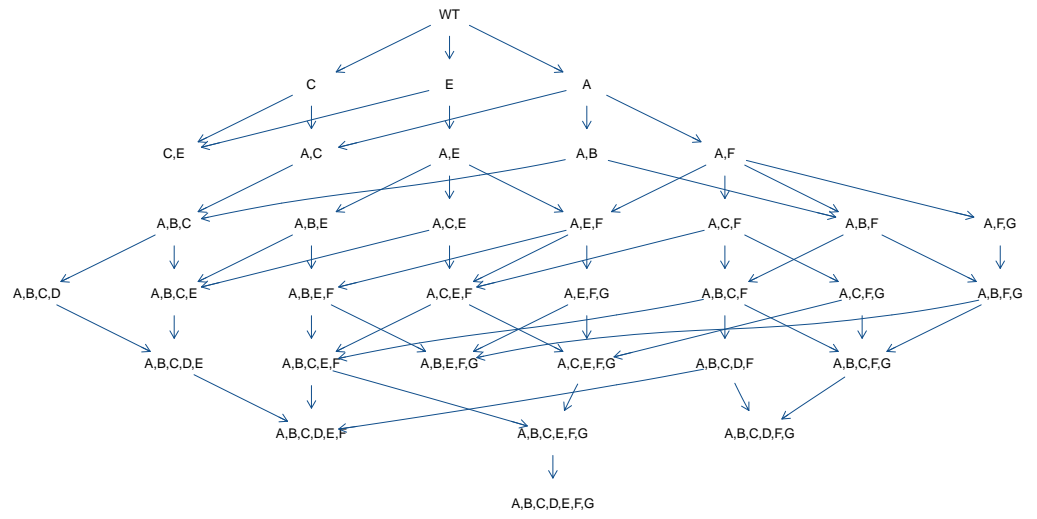

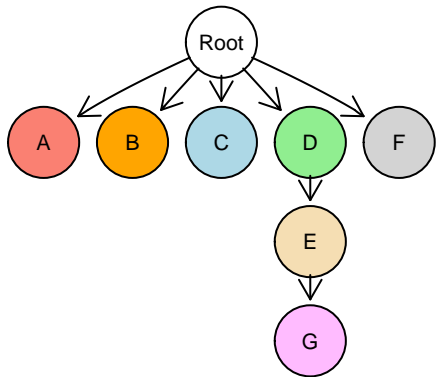

*ID* 6JONUdvaeCCGnS7Y  
*acc genotypes* 64  
*peaks no back* 8  
*removed edges* 34  
*prop rem edges* 0.193

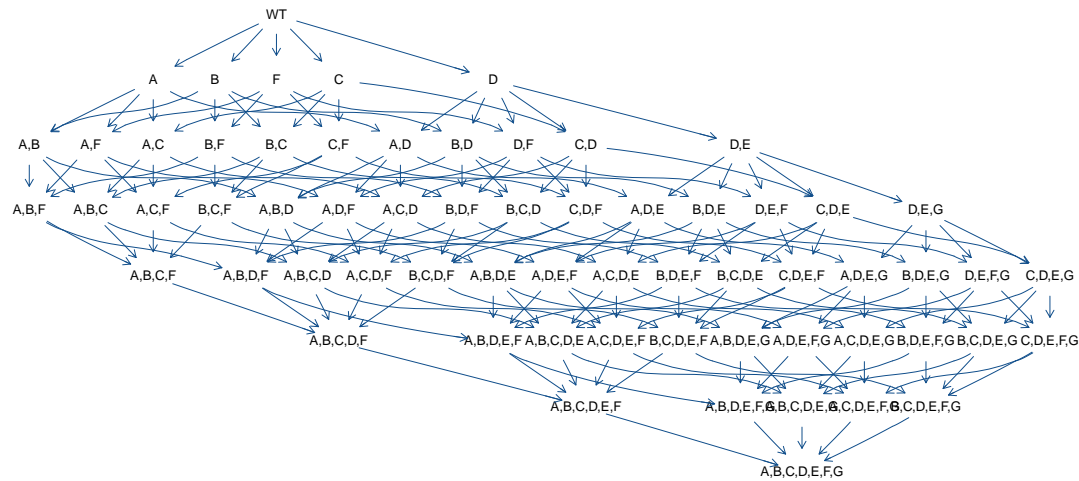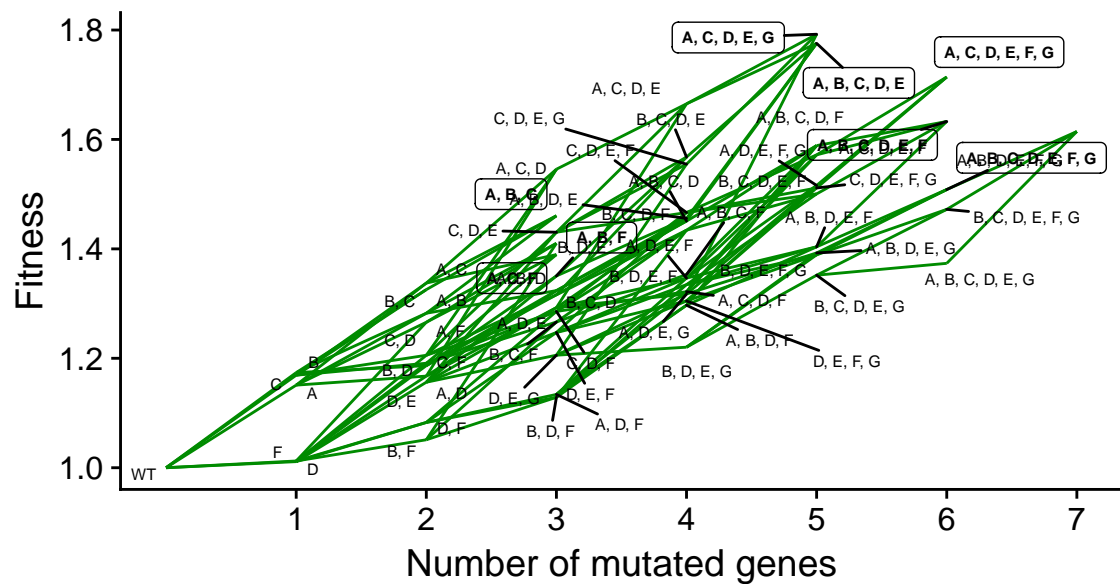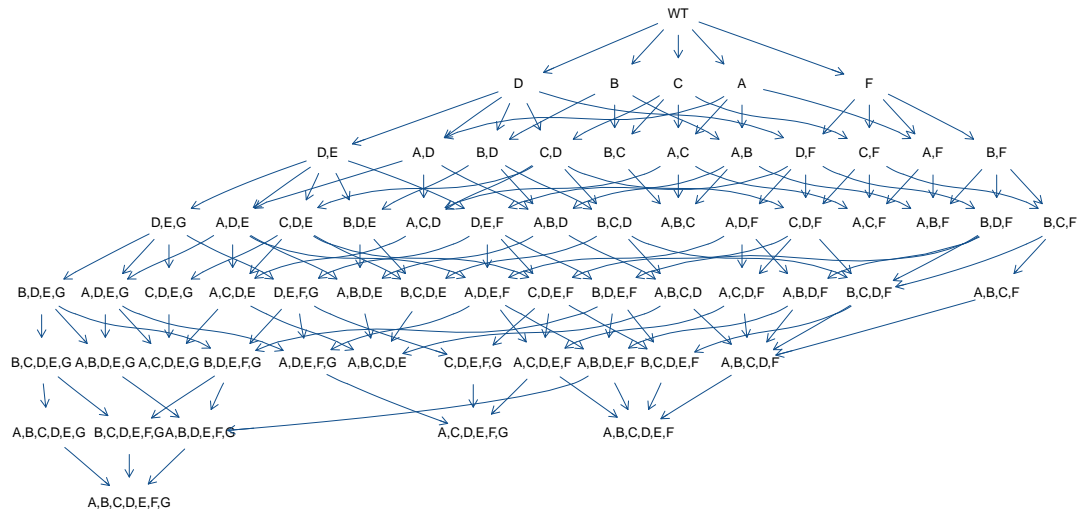

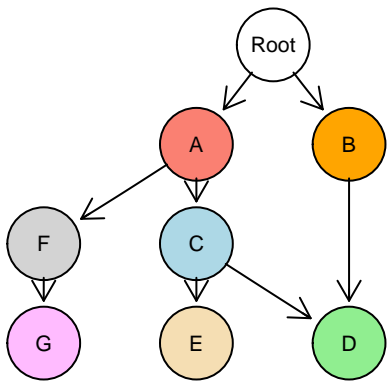

ID 6V3IXXX77zzMpi58  
 acc genotypes 26  
 peaks no back 2  
 removed edges 9  
 prop rem edges 0.184

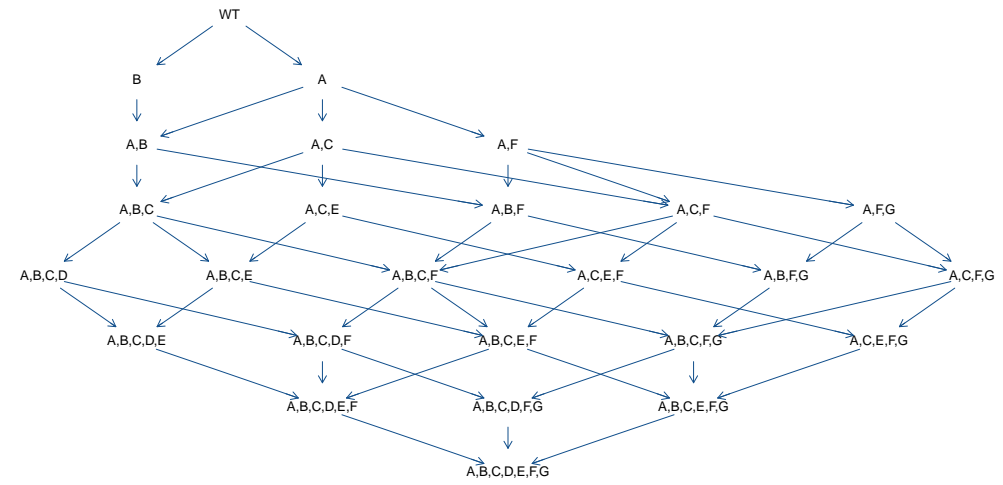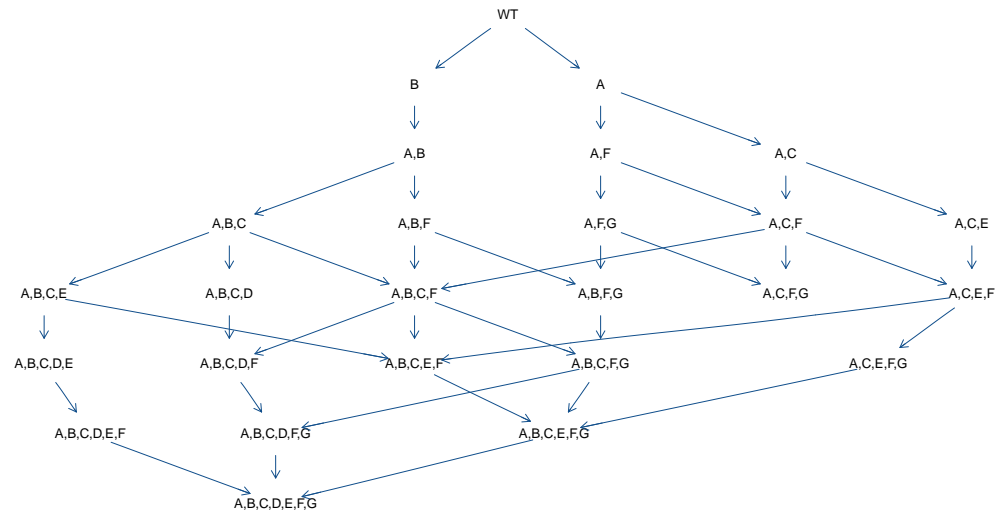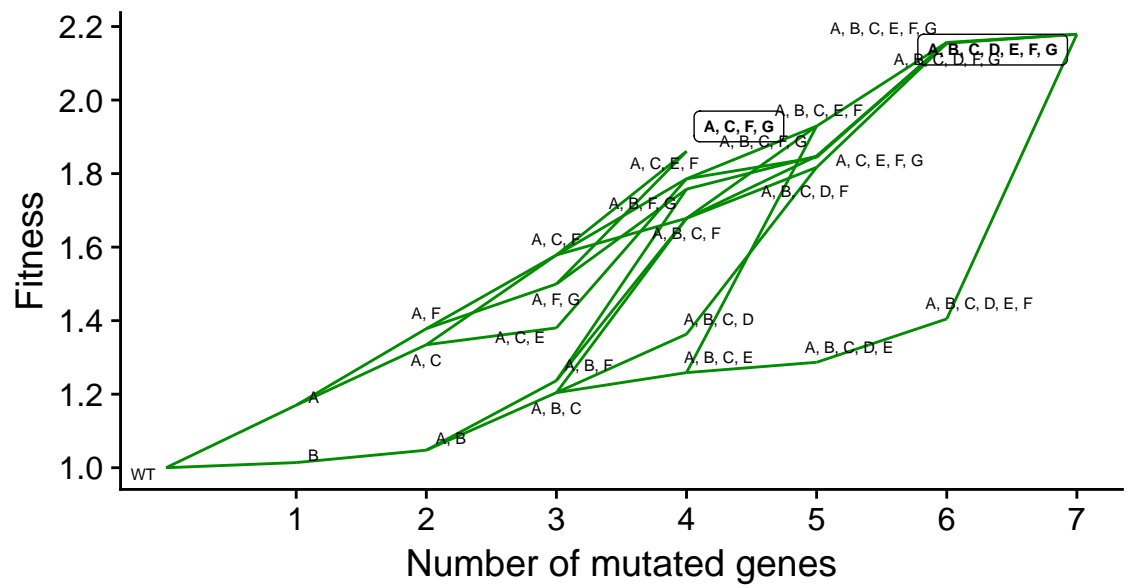

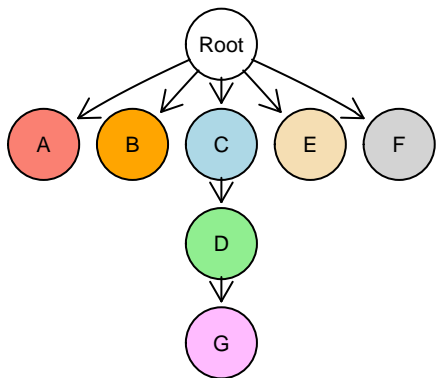

ID **738zqMpeBSiZXfez**  
 acc genotypes **64**  
 peaks no back **7**  
 removed edges **26**  
 prop rem edges **0.148**

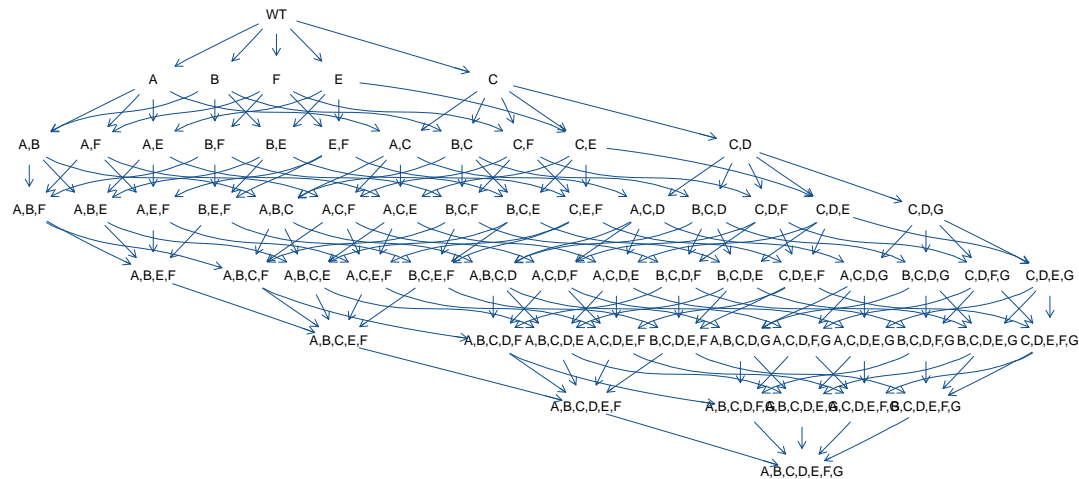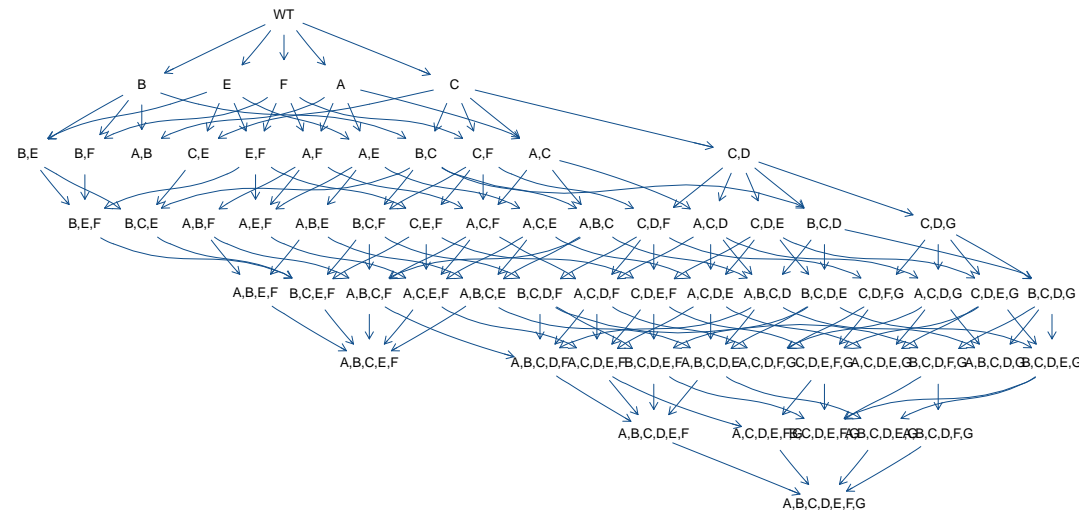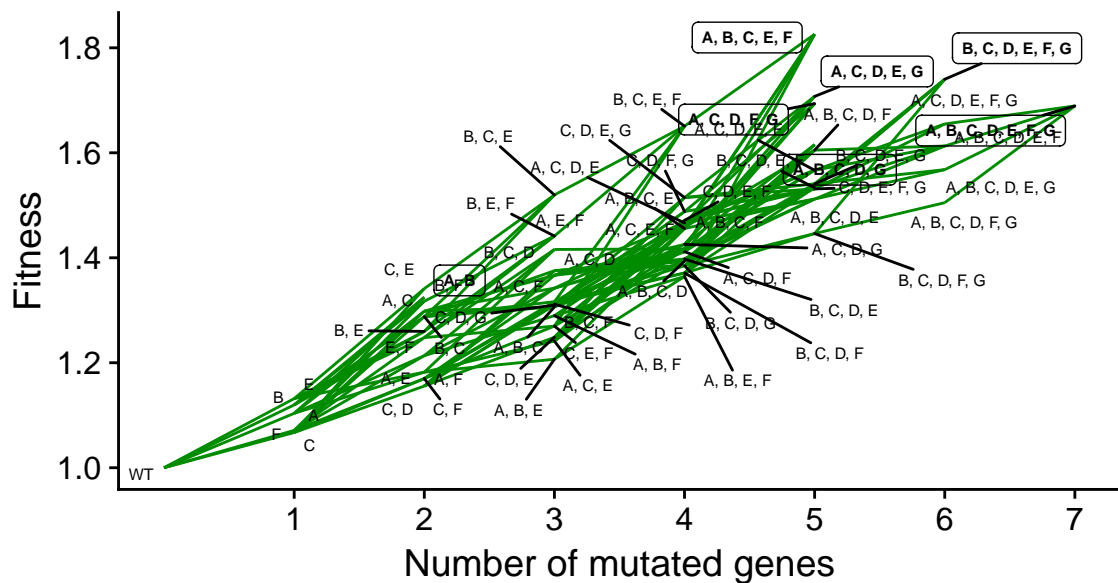

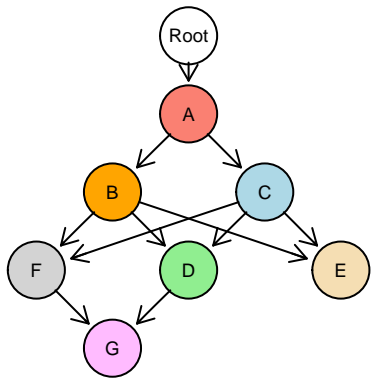

ID 7E10plyu7UgulUI8I  
 acc genotypes 14  
 peaks no back 2  
 removed edges 1  
 prop rem edges 0.05

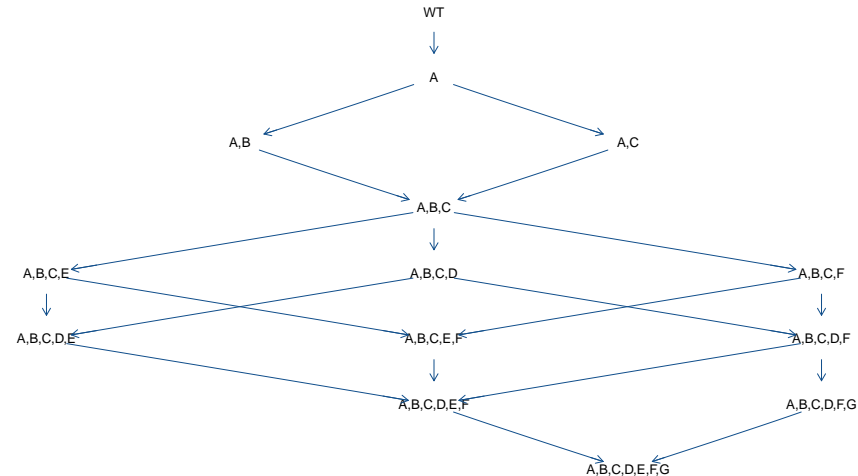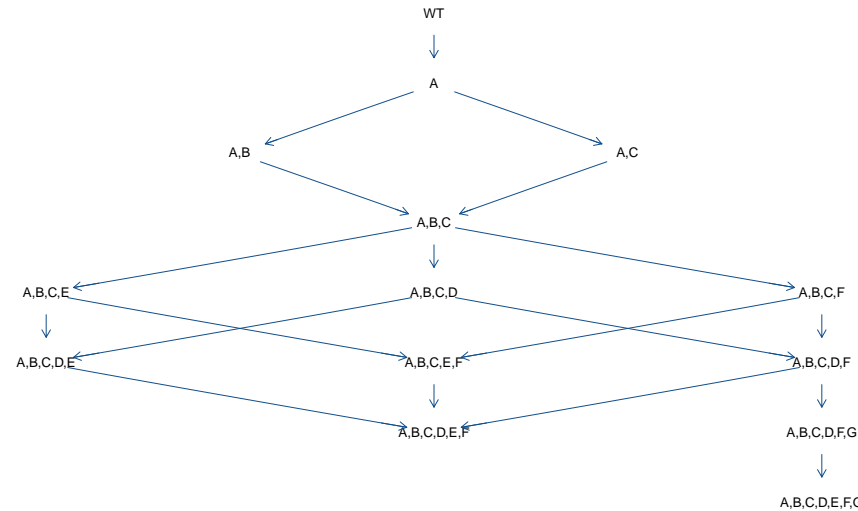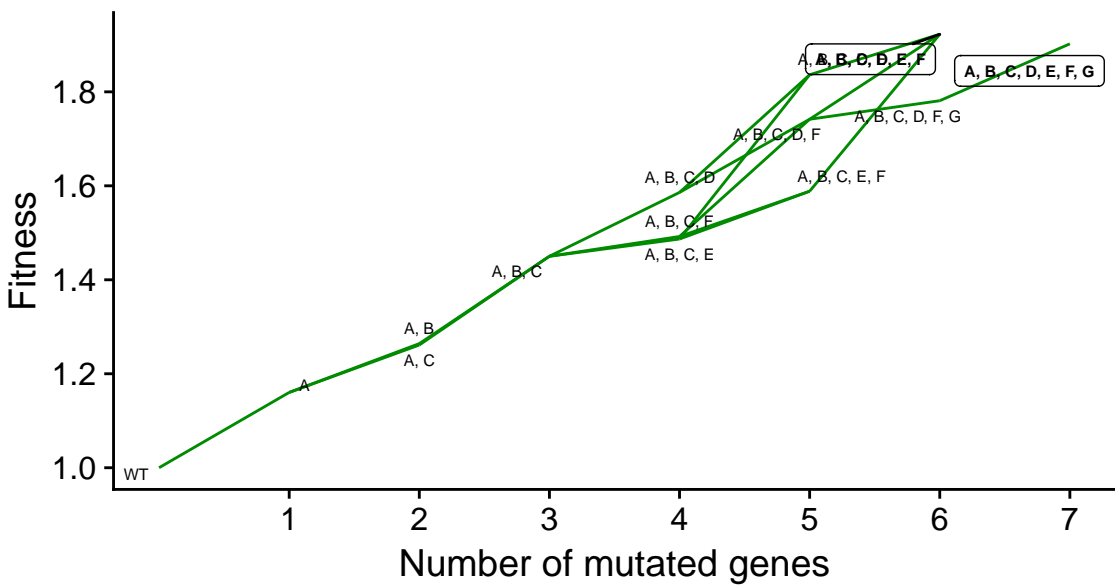



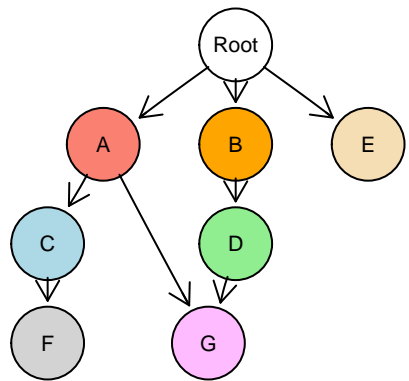

ID 7L5tLW7iVItNxTJ6  
 acc genotypes 30  
 peaks no back 6  
 removed edges 14  
 prop rem edges 0.237

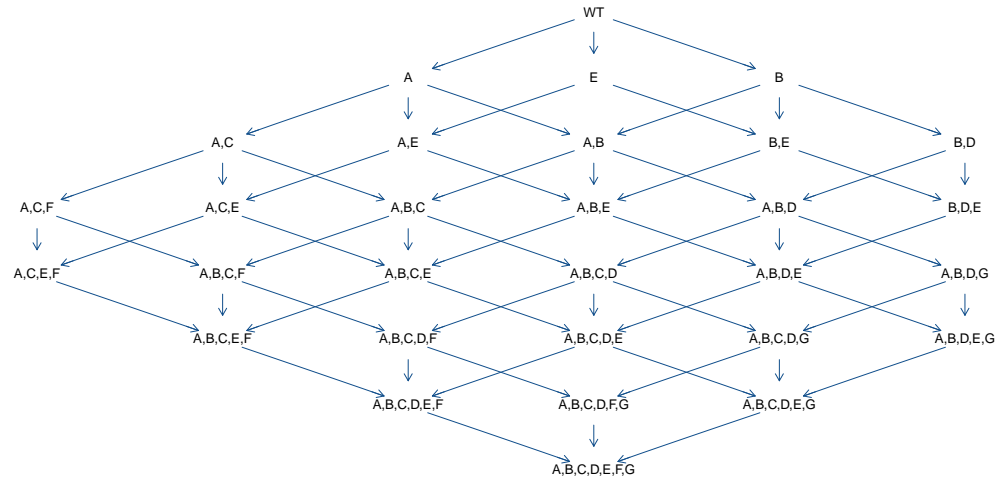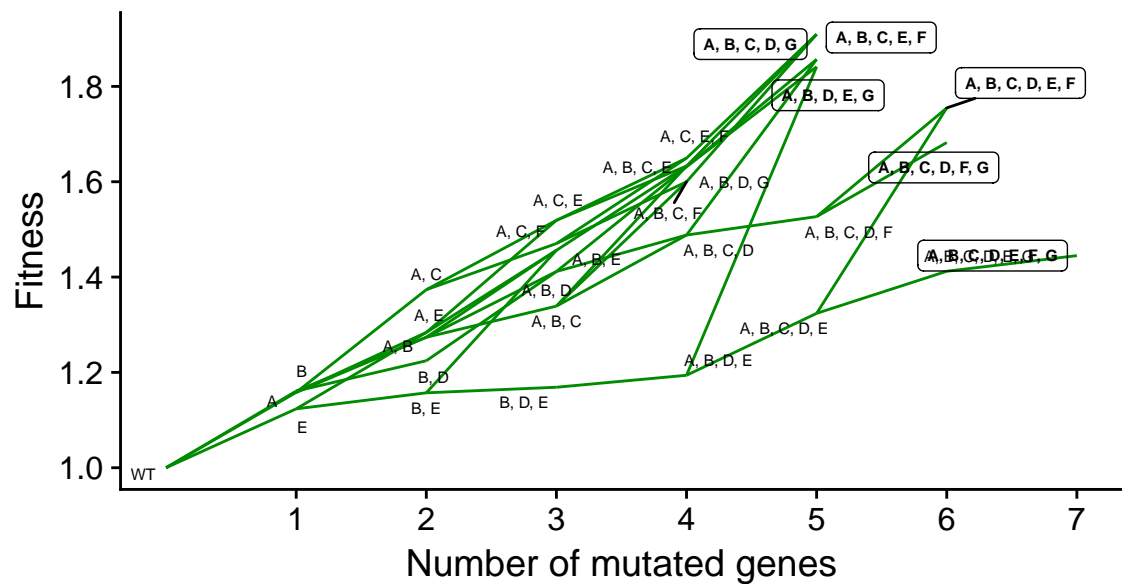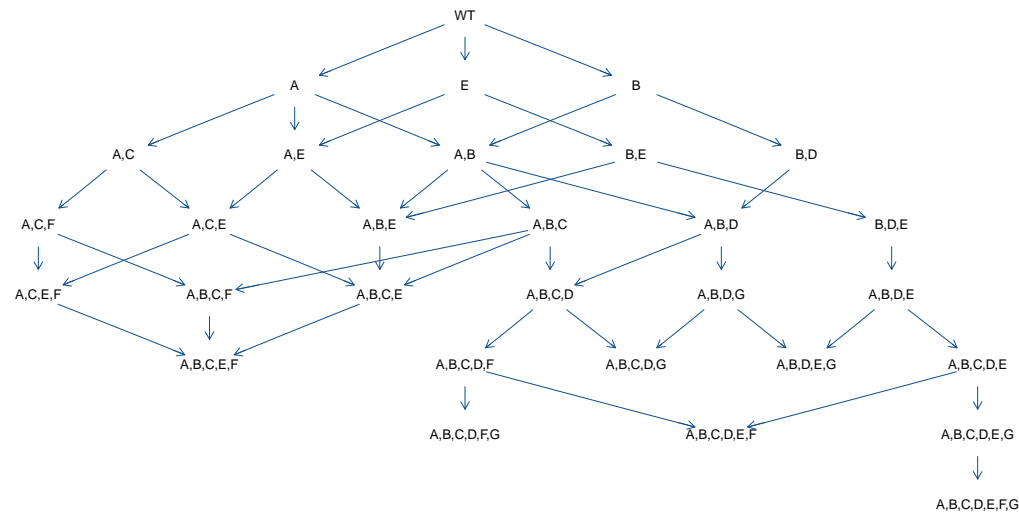

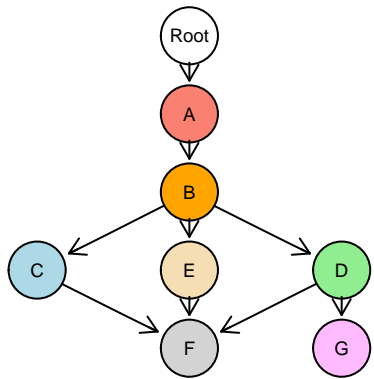

ID **7N2SgGN48X5QWxk9**  
 acc genotypes **16**  
 peaks no back **2**  
 removed edges **5**  
 prop rem edges **0.2**

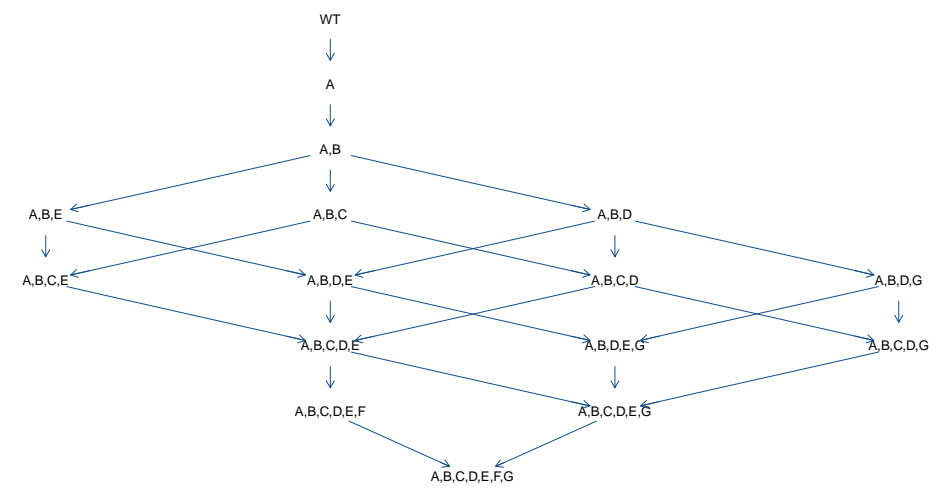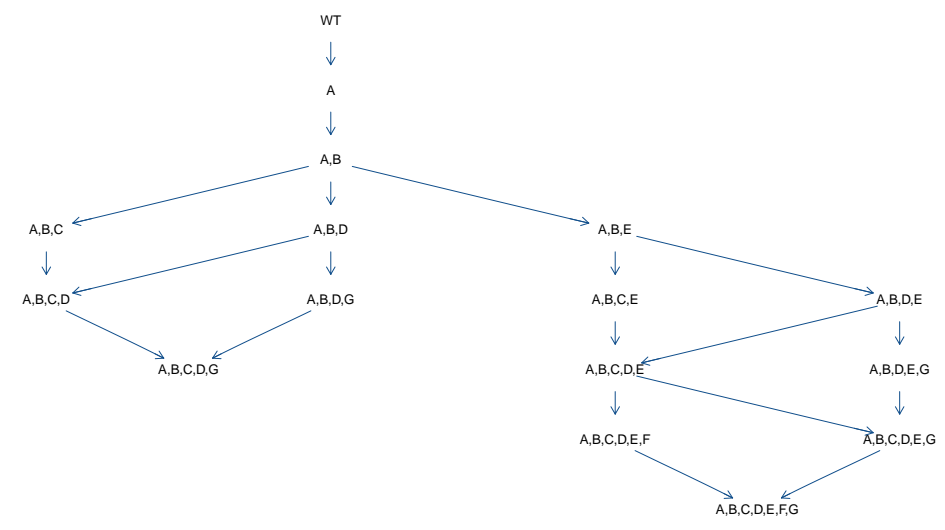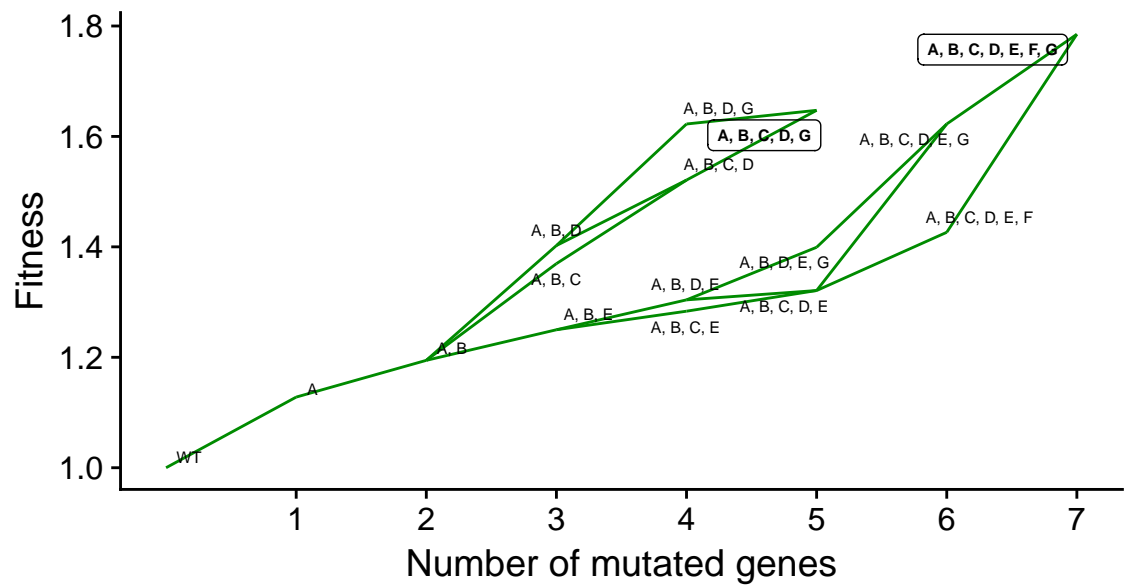

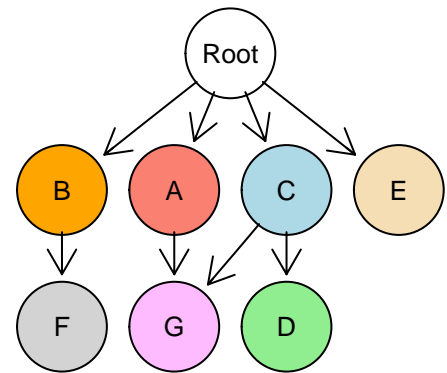

ID **7N9Bf18TzdbZ2zab**  
 acc genotypes **48**  
 peaks no back **6**  
 removed edges **24**  
 prop rem edges **0.207**

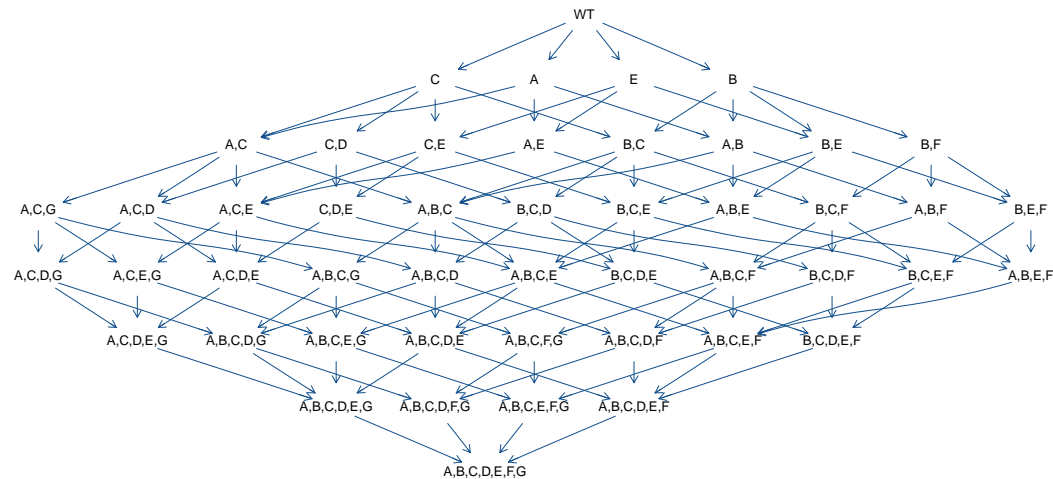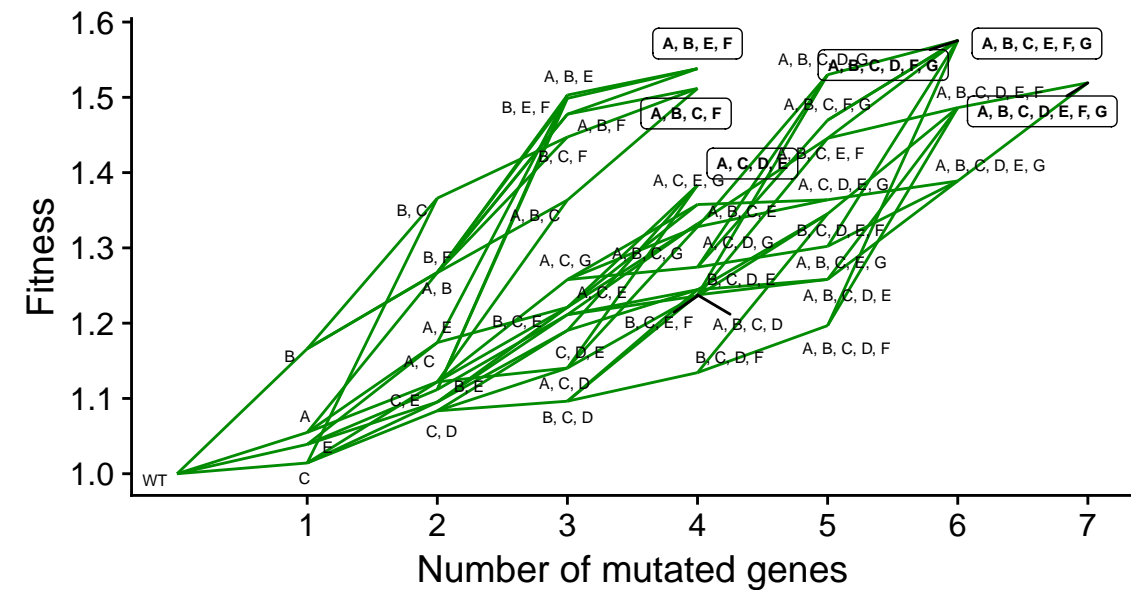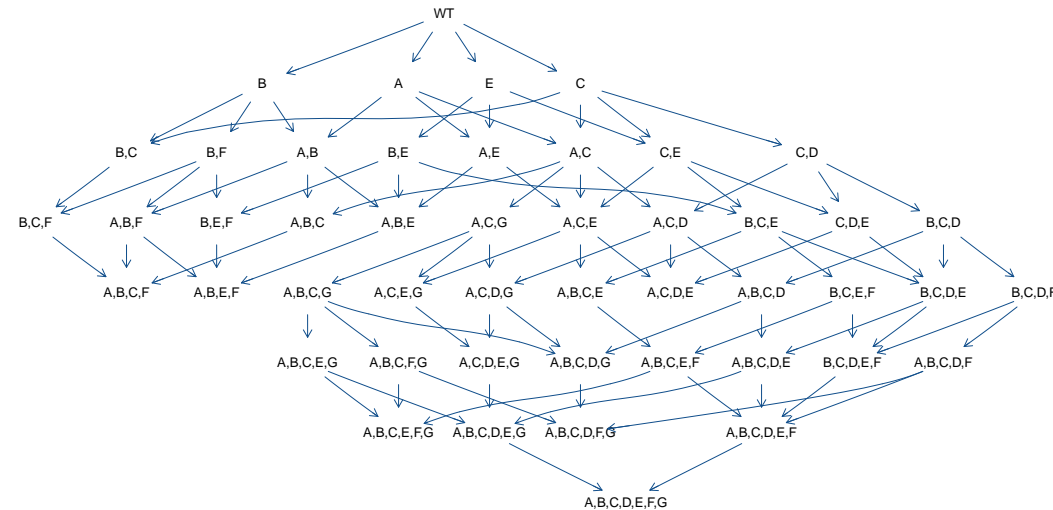

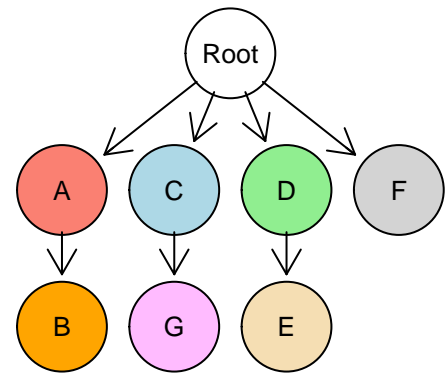

ID **7wKXobmcjD38LD6b**  
 acc genotypes **54**  
 peaks no back **8**  
 removed edges **29**  
 prop rem edges **0.215**

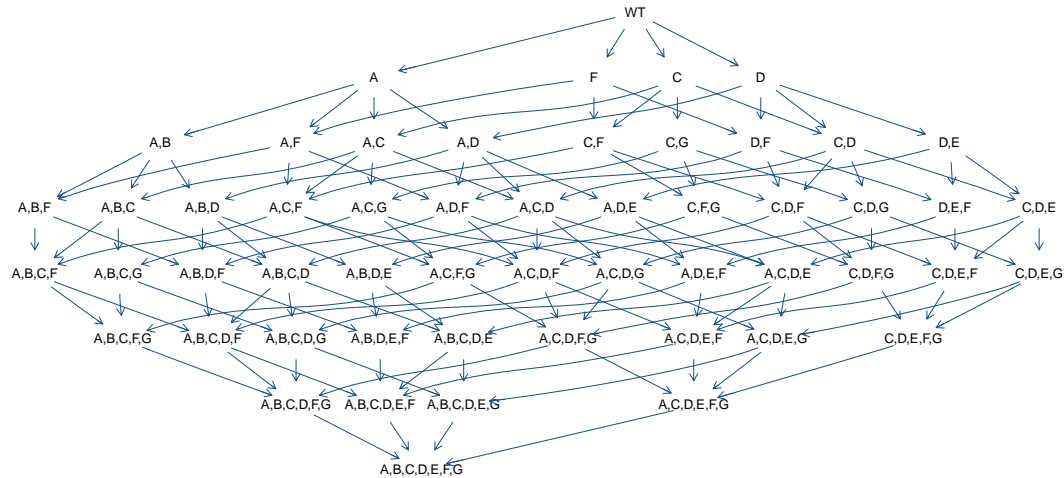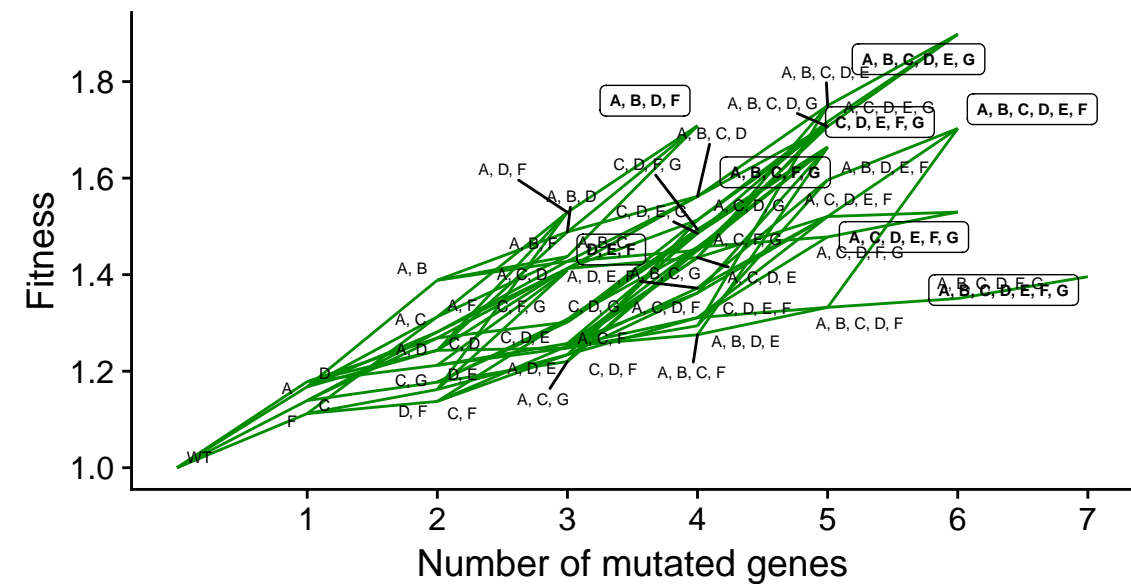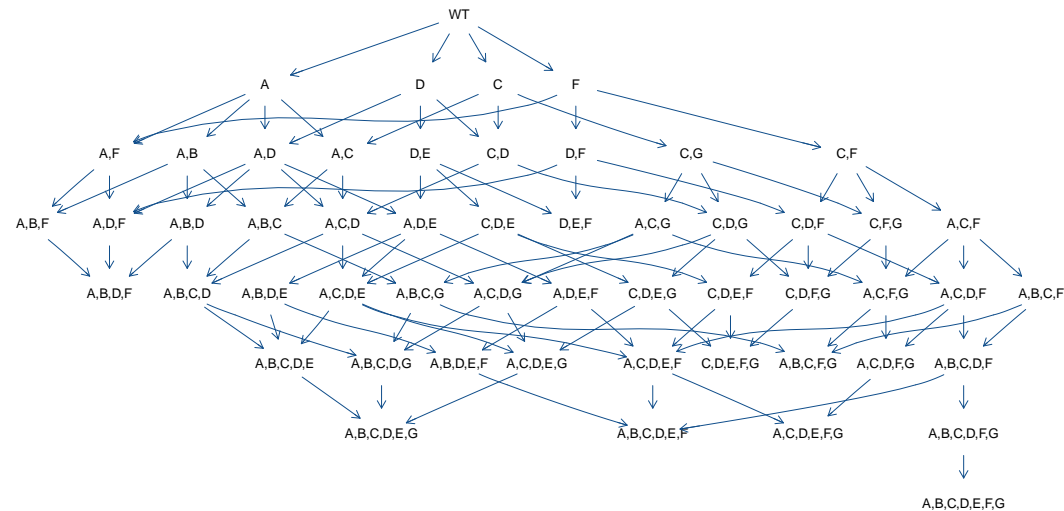

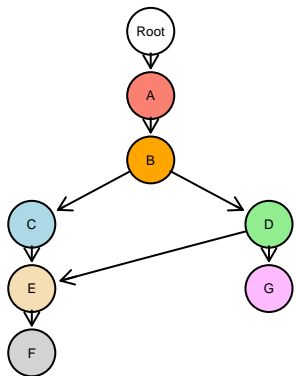

*ID* 8jUIKcUqRbPGoMif  
*acc genotypes* 12  
*peaks no back* 3  
*removed edges* 2  
*prop rem edges* 0.133

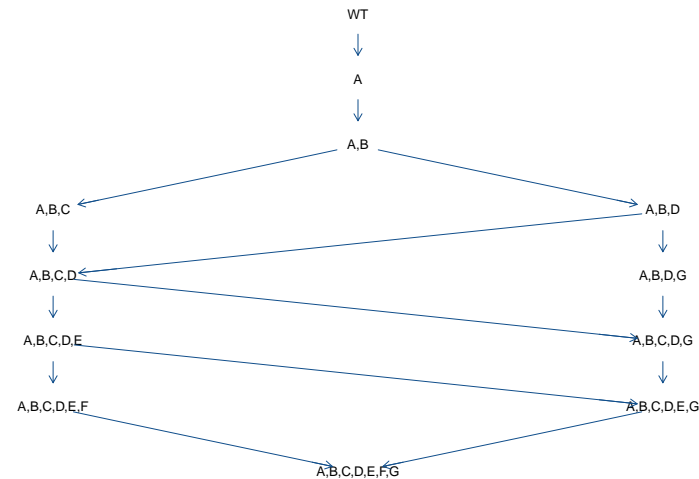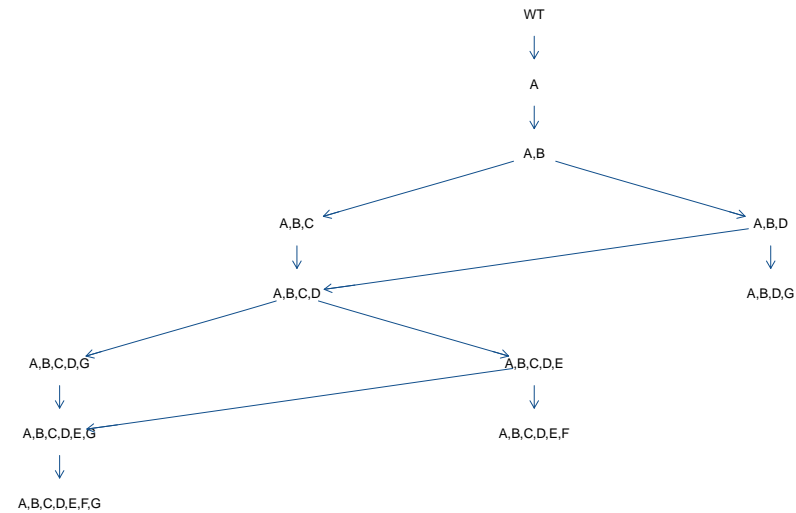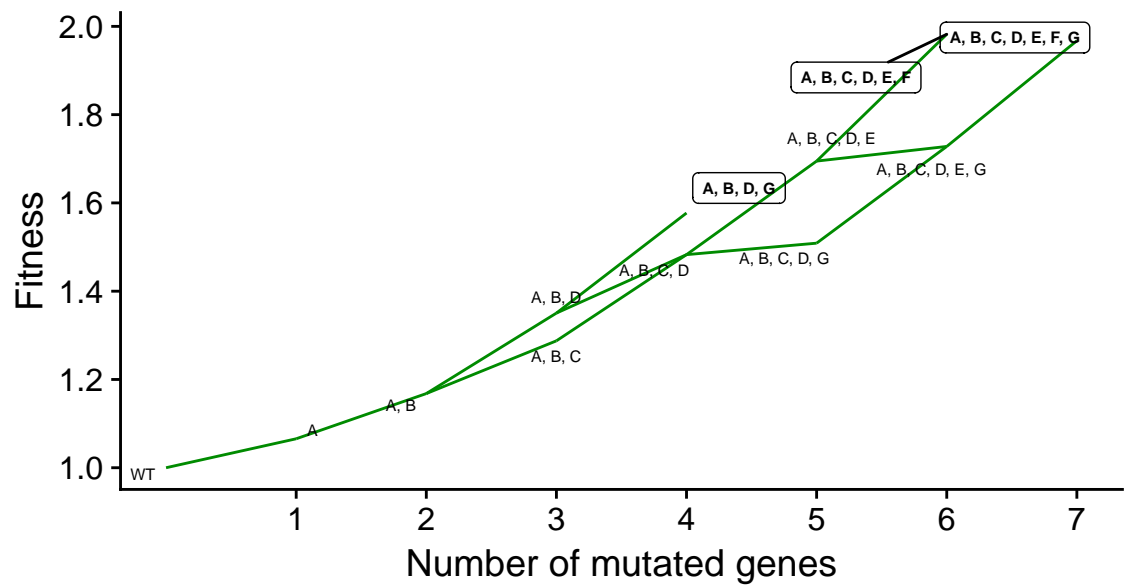

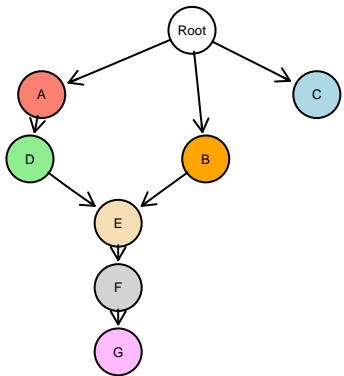

ID 8mSMIsAi8LuLuzZC  
 acc genotypes 18  
 peaks no back 4  
 removed edges 4  
 prop rem edges 0.138

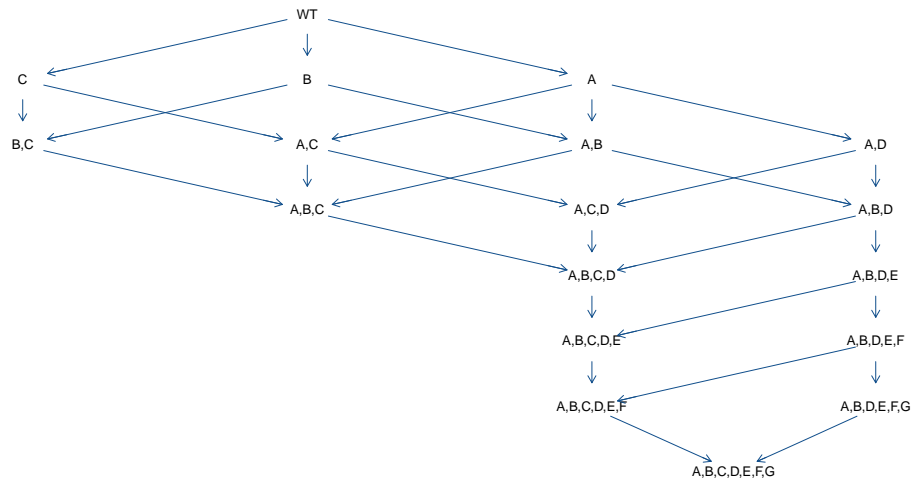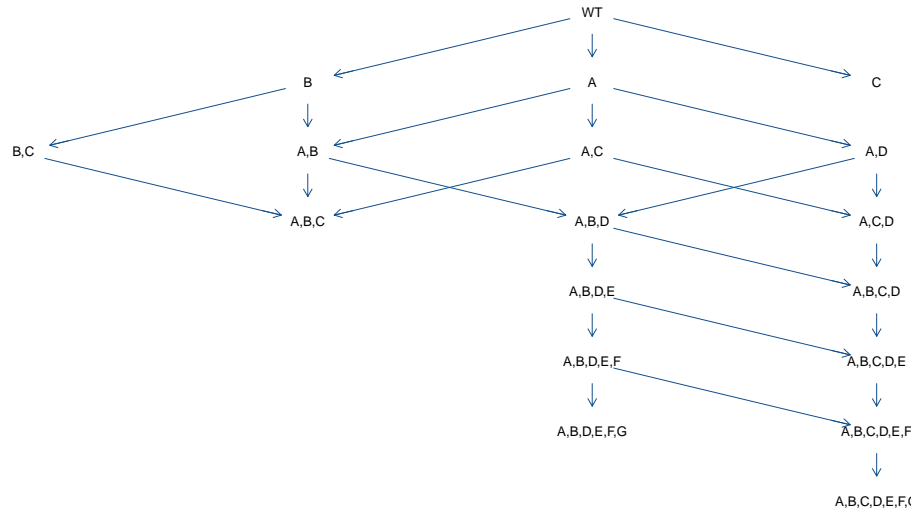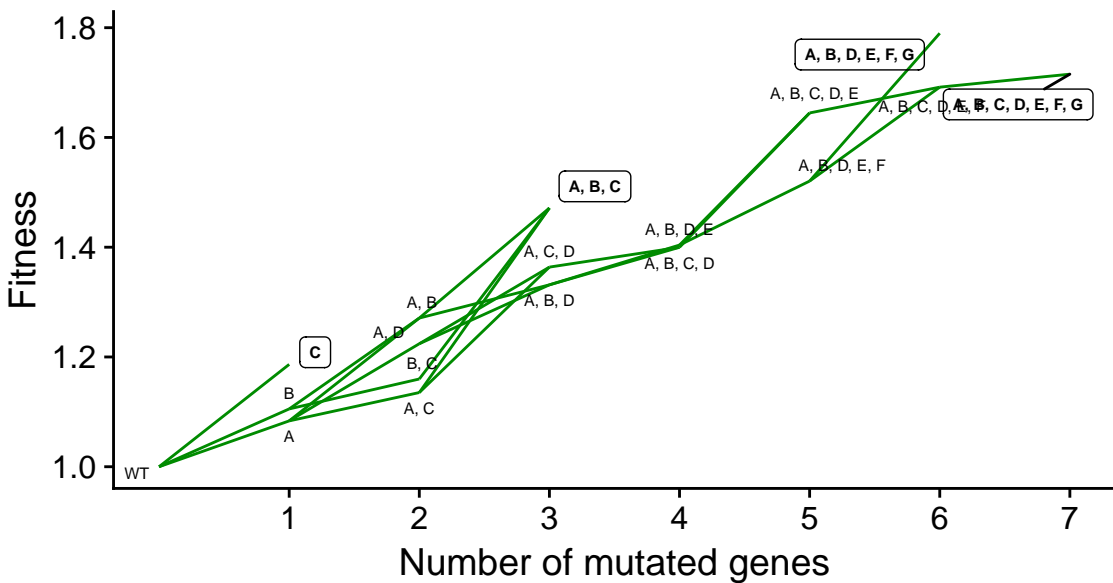

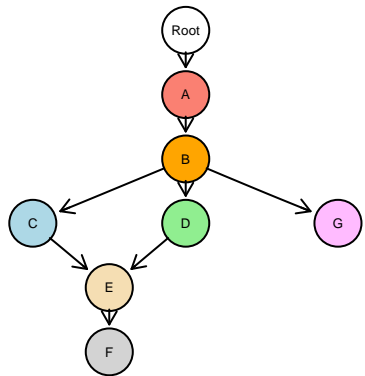

ID 8QIFQCUIUVfc10PZr  
 acc genotypes 14  
 peaks no back 2  
 removed edges 1  
 prop rem edges 0.05

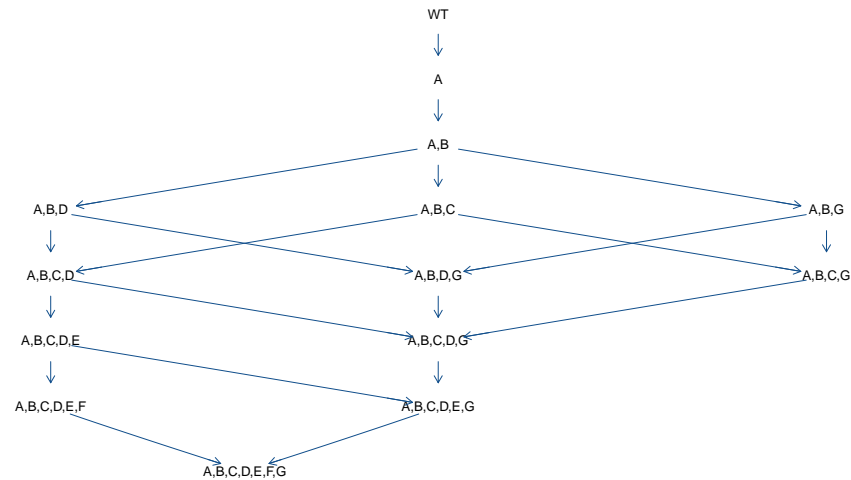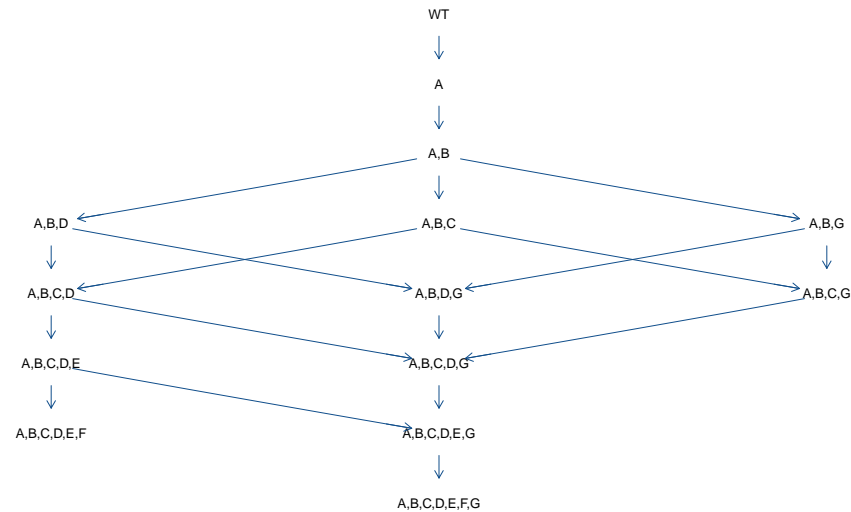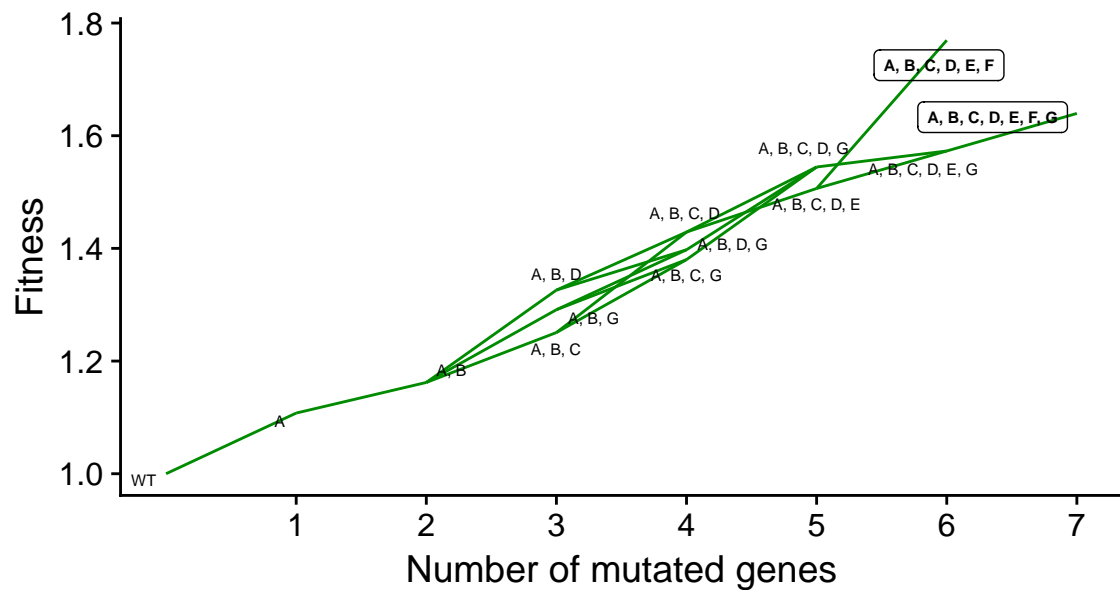

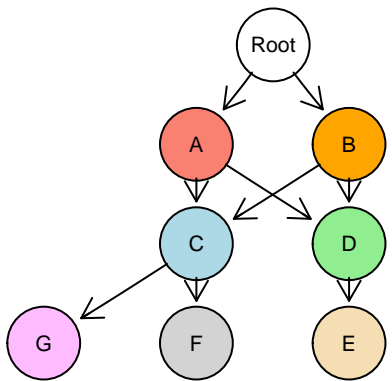

*ID* 8u1FzrFscU1z8xqB  
*acc genotypes* 18  
*peaks no back* 4  
*removed edges* 3  
*prop rem edges* 0.103

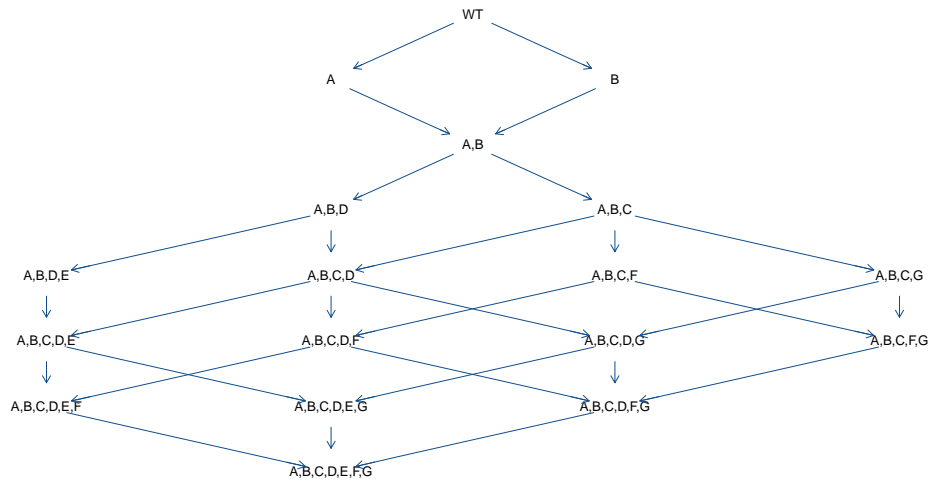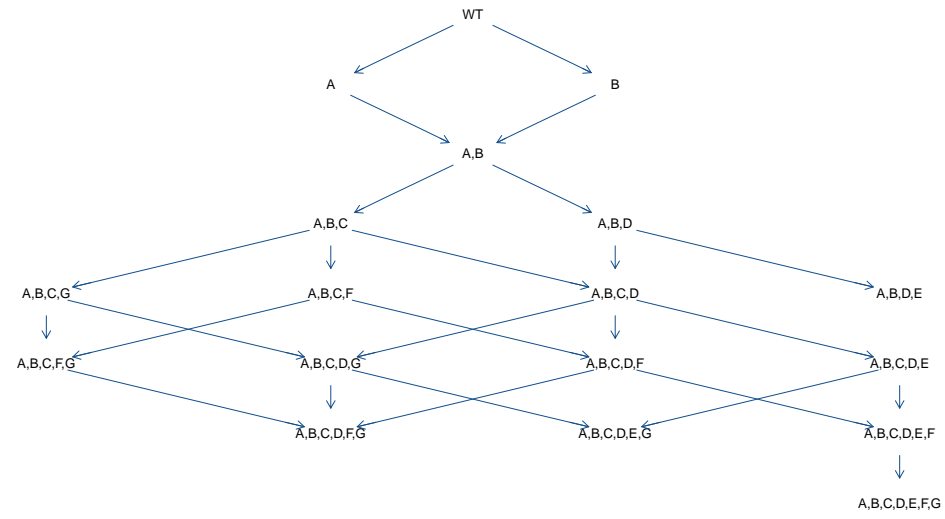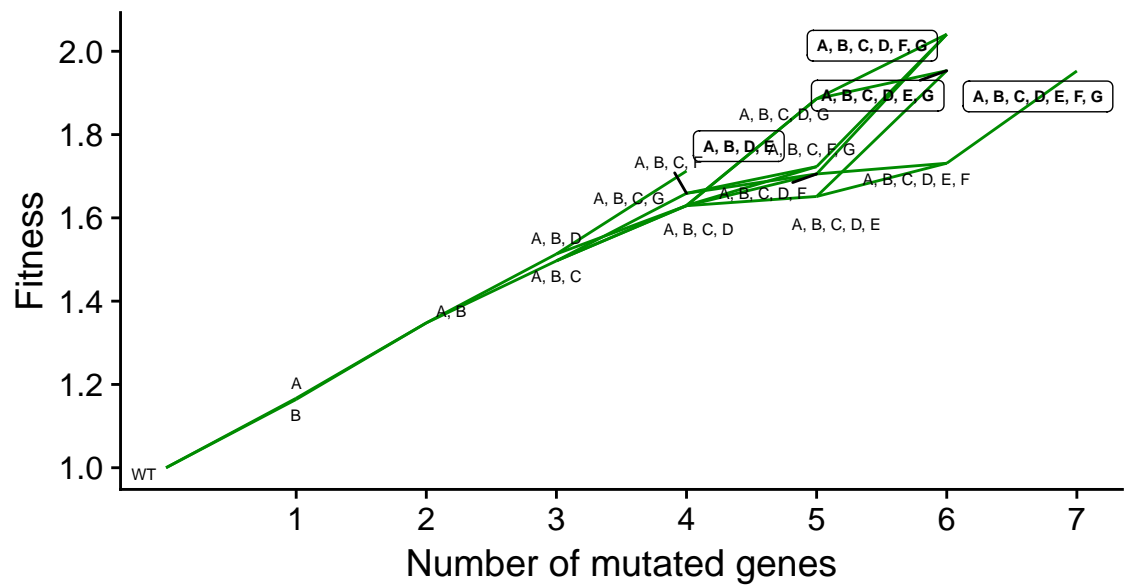



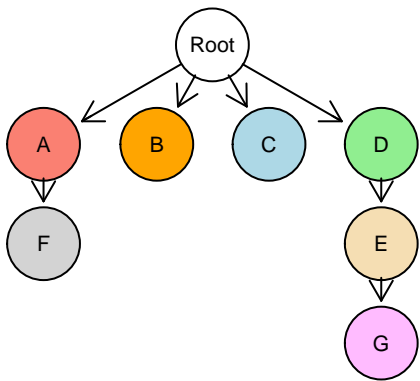

ID 9INXHxuzCY7gqghs  
 acc genotypes 48  
 peaks no back 6  
 removed edges 26  
 prop rem edges 0.224

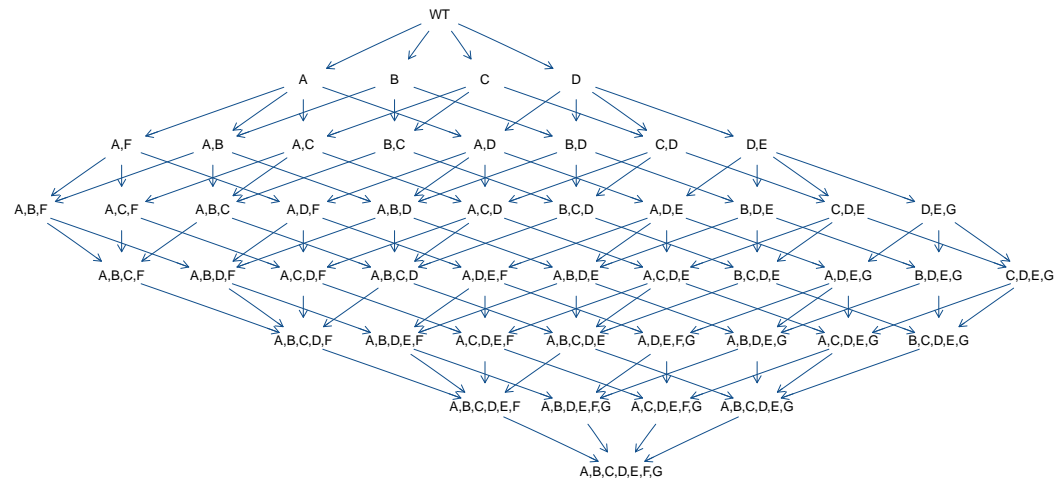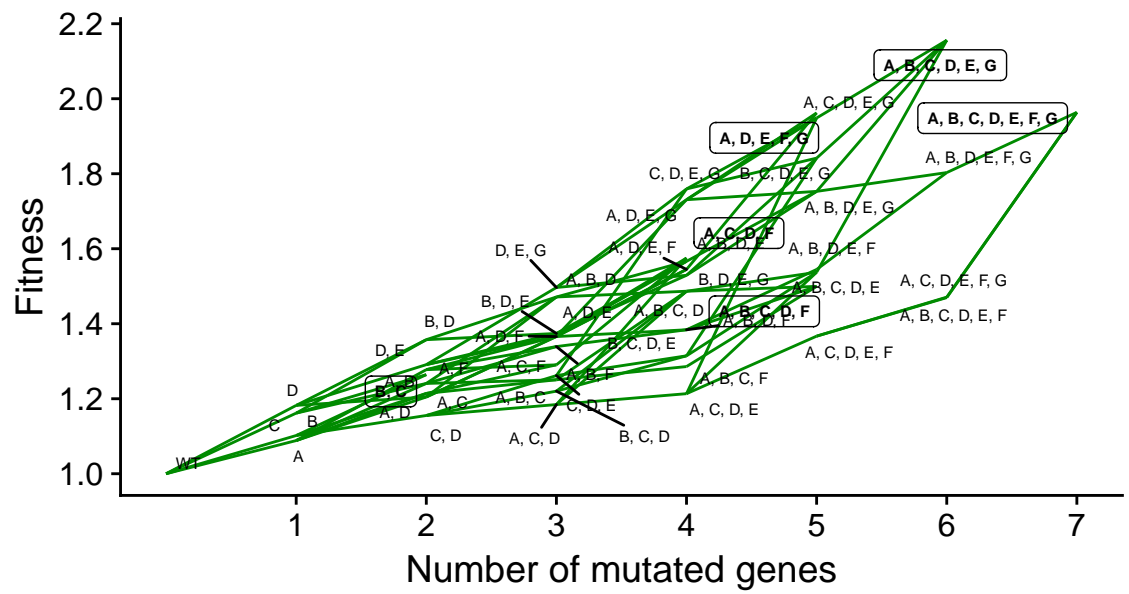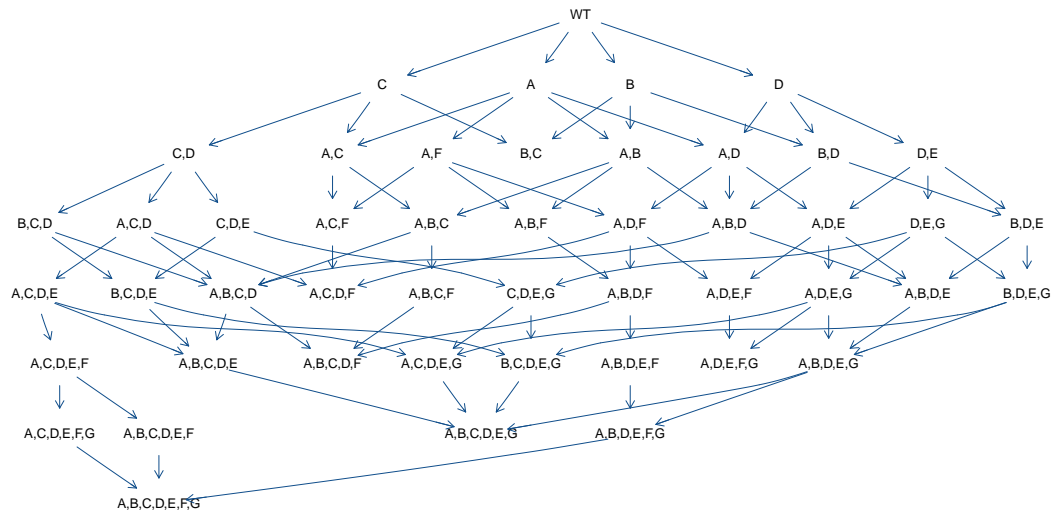

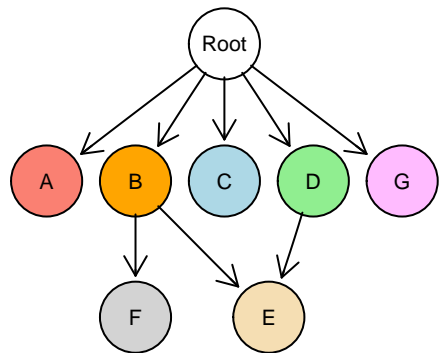

*ID* 9p9QxtT6PnU5iRpy  
*acc genotypes* 64  
*peaks no back* 9  
*removed edges* 37  
*prop rem edges* 0.21

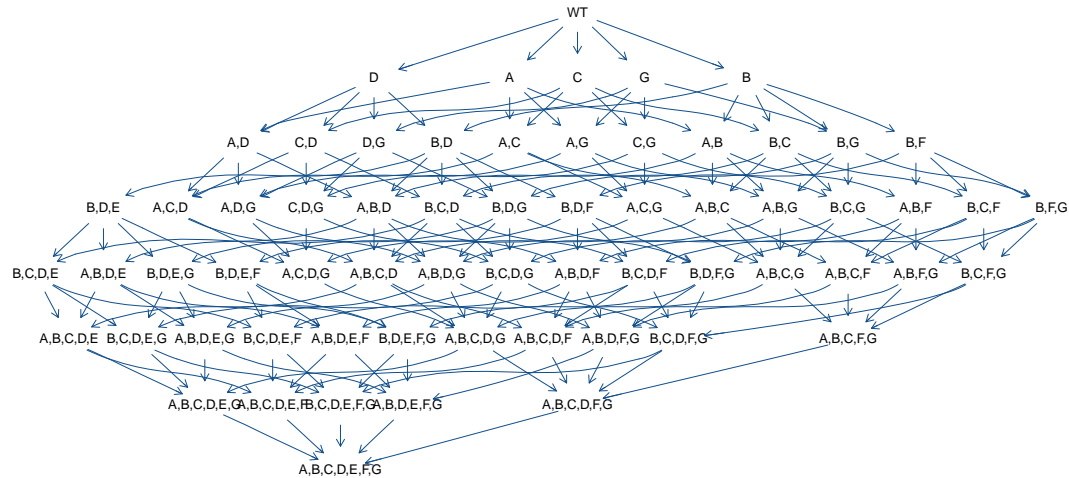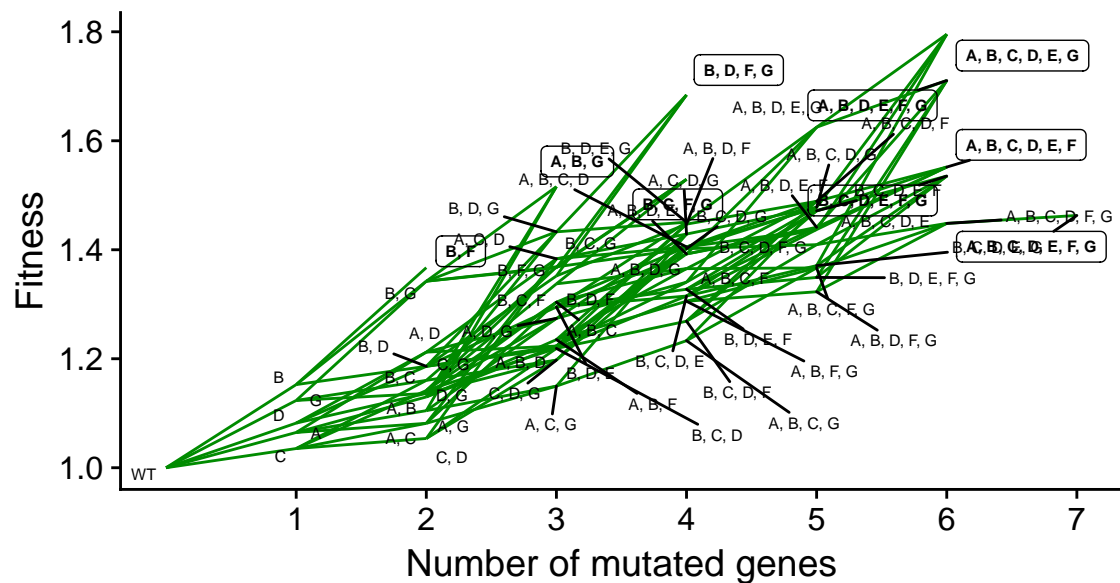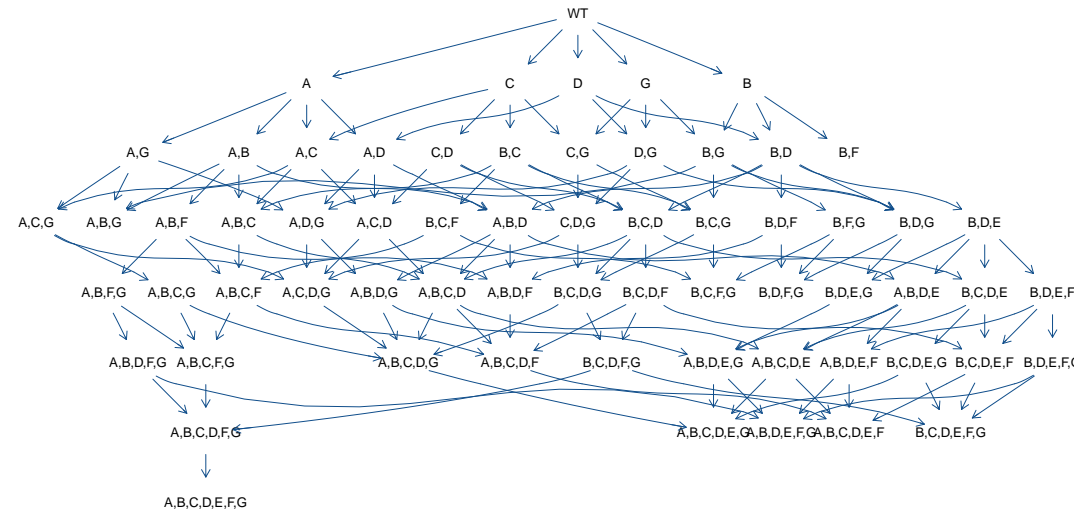

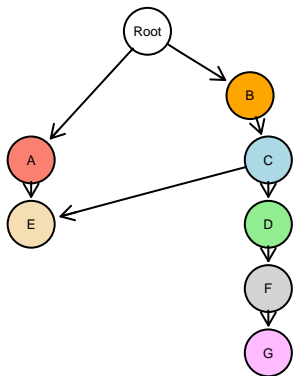

ID 9xXGITgcqHNk6QAO  
 acc genotypes 16  
 peaks no back 4  
 removed edges 4  
 prop rem edges 0.174

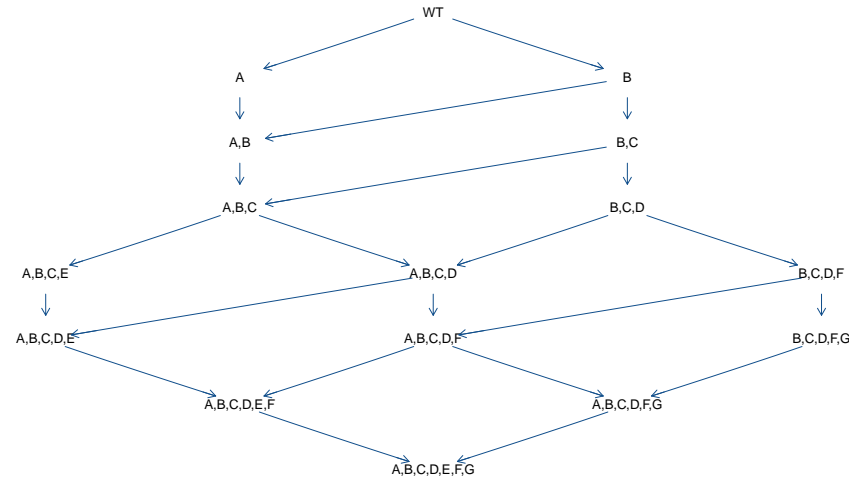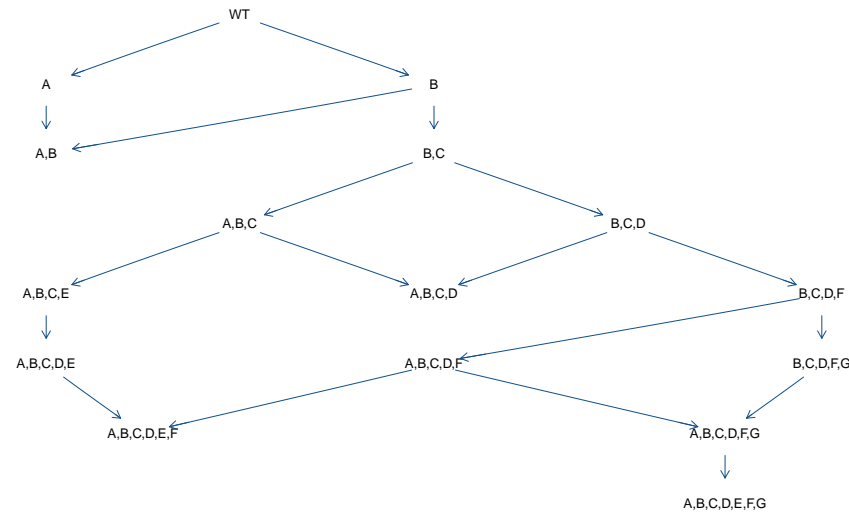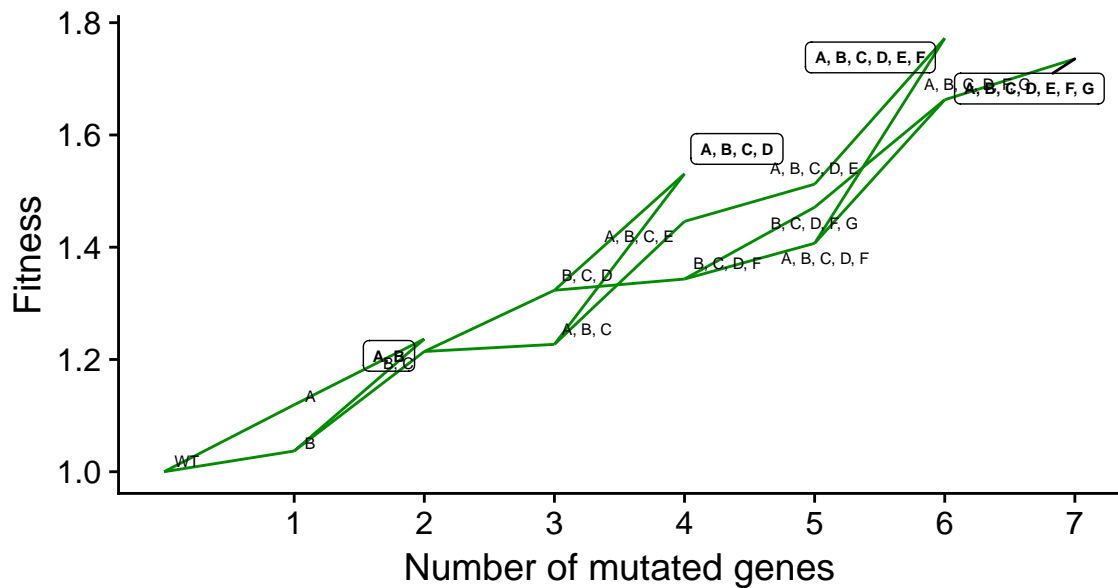



ID [9yJB9KVObV7syFm](#)  
 acc genotypes **41**  
 peaks no back **6**  
 removed edges **16**  
 prop rem edges **0.158**

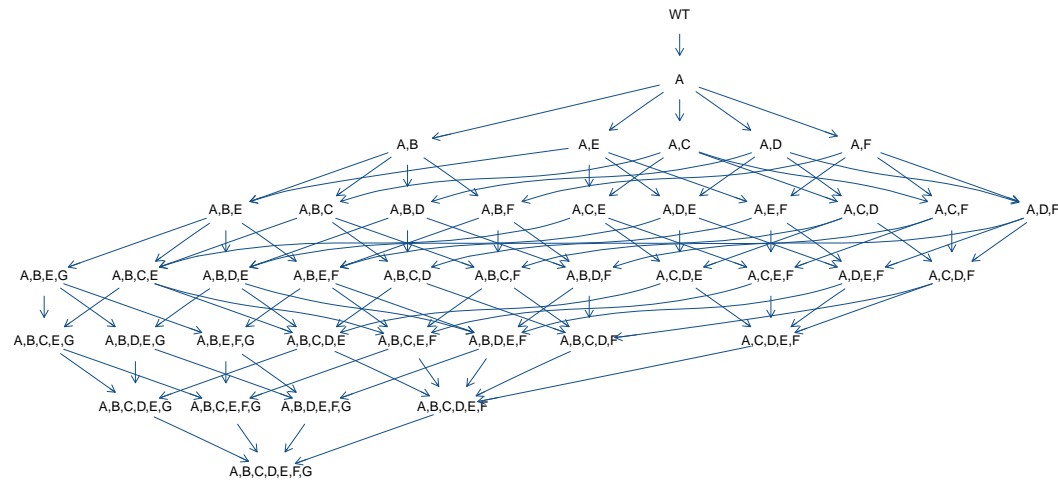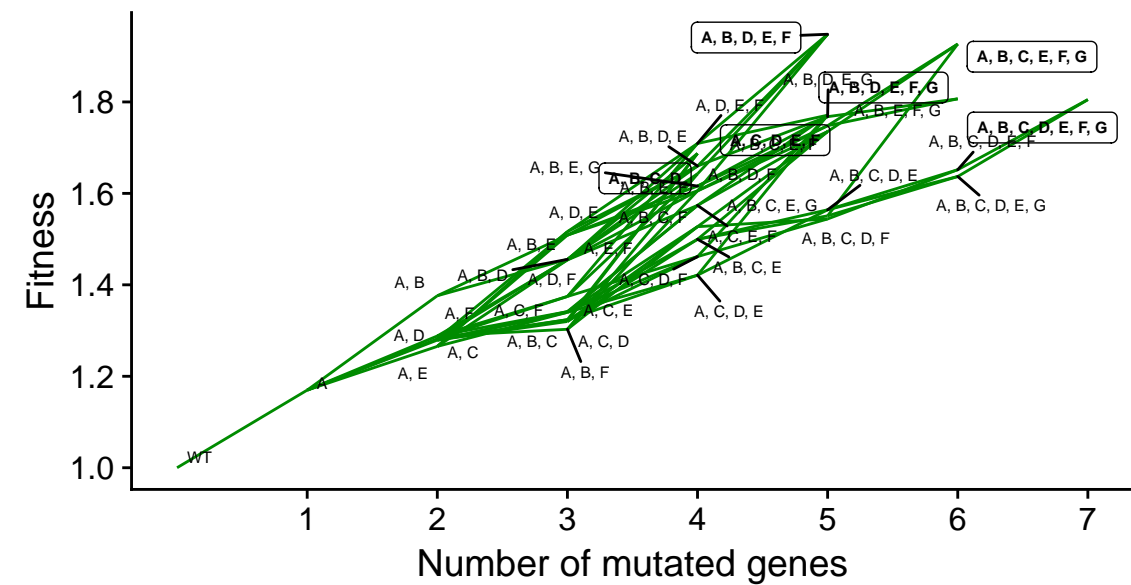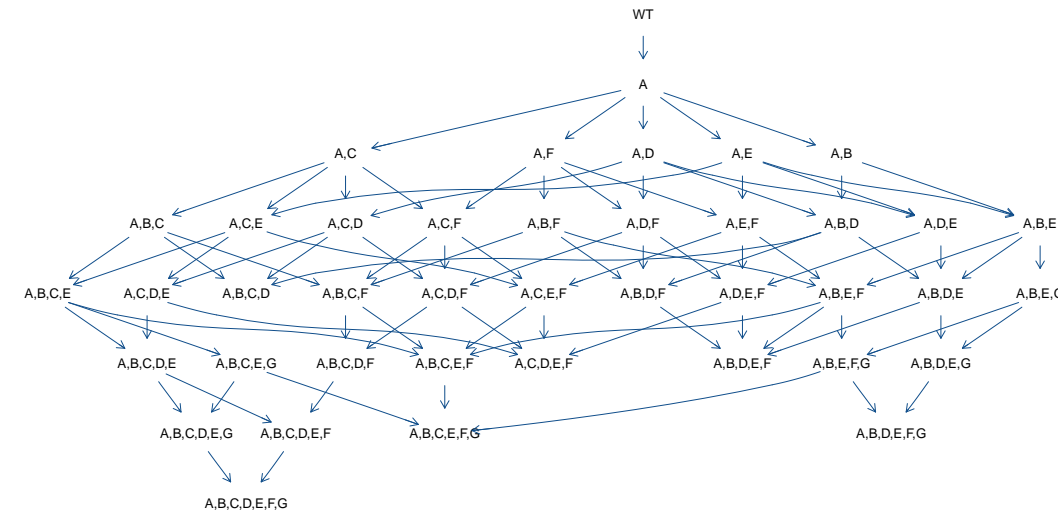



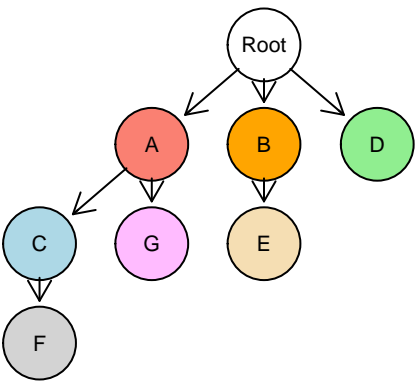

ID **aABp8Hfk3fLTX4co**  
 acc genotypes **42**  
 peaks no back **7**  
 removed edges **17**  
 prop rem edges **0.175**

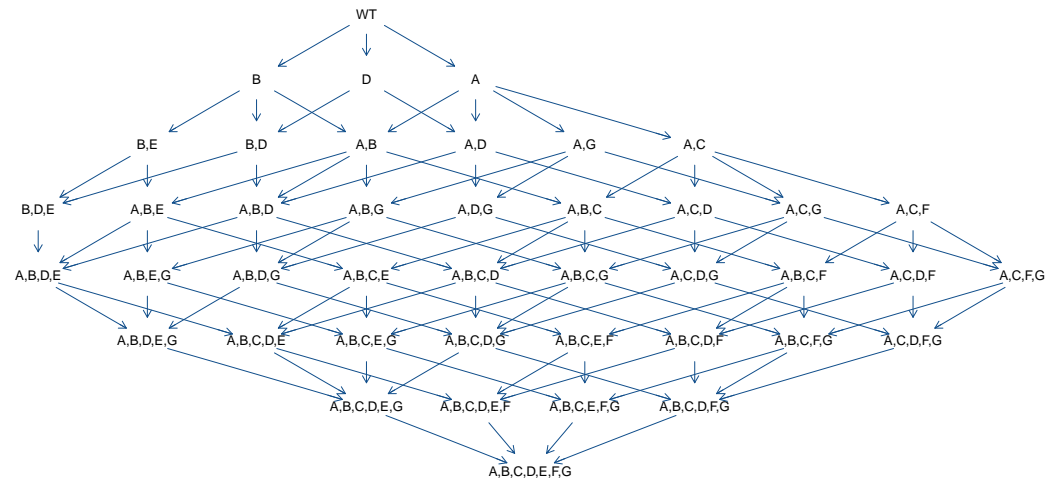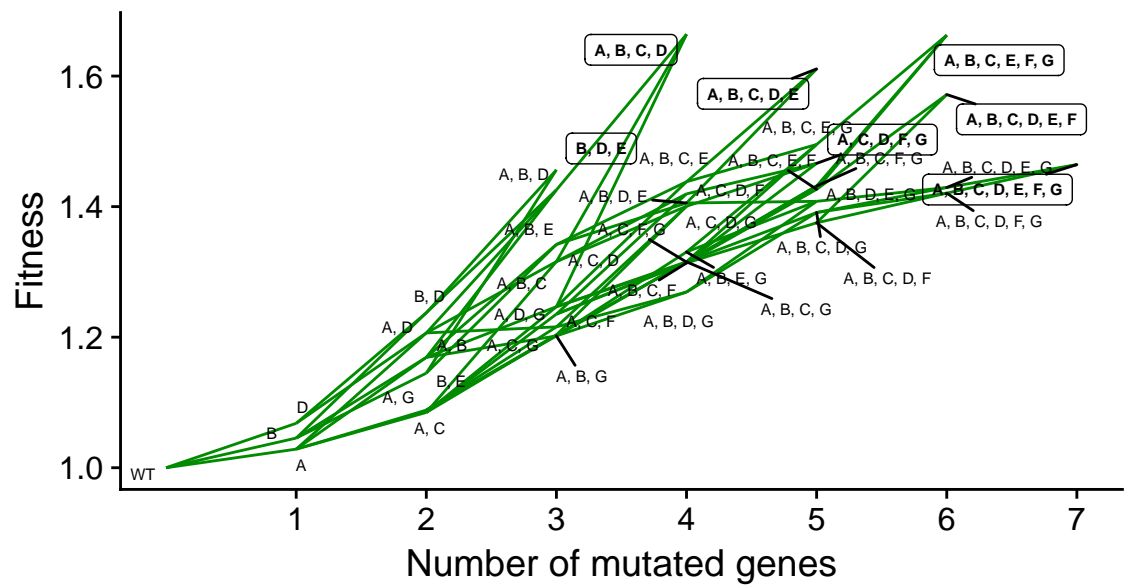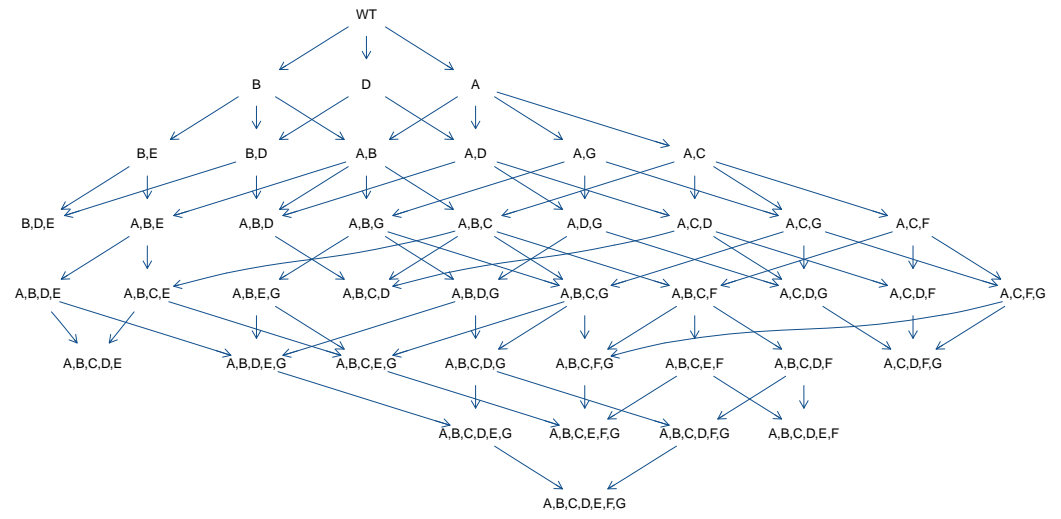

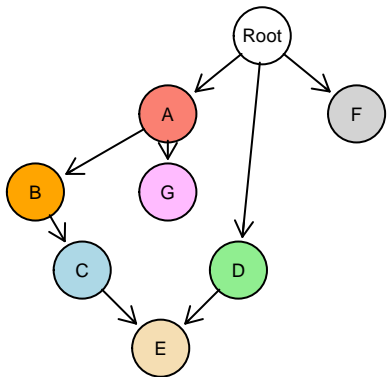

ID AeBhYdSJ32SlaHgW  
 acc genotypes 32  
 peaks no back 3  
 removed edges 8  
 prop rem edges 0.118

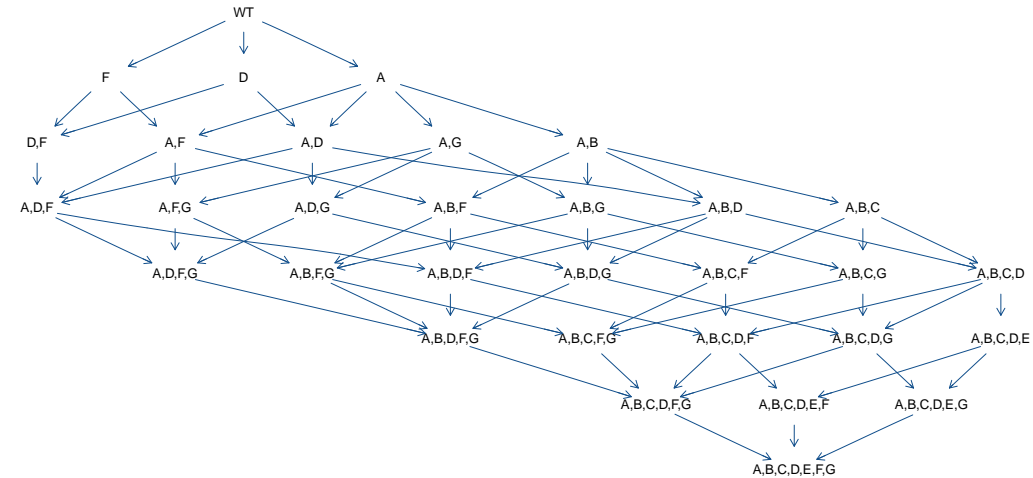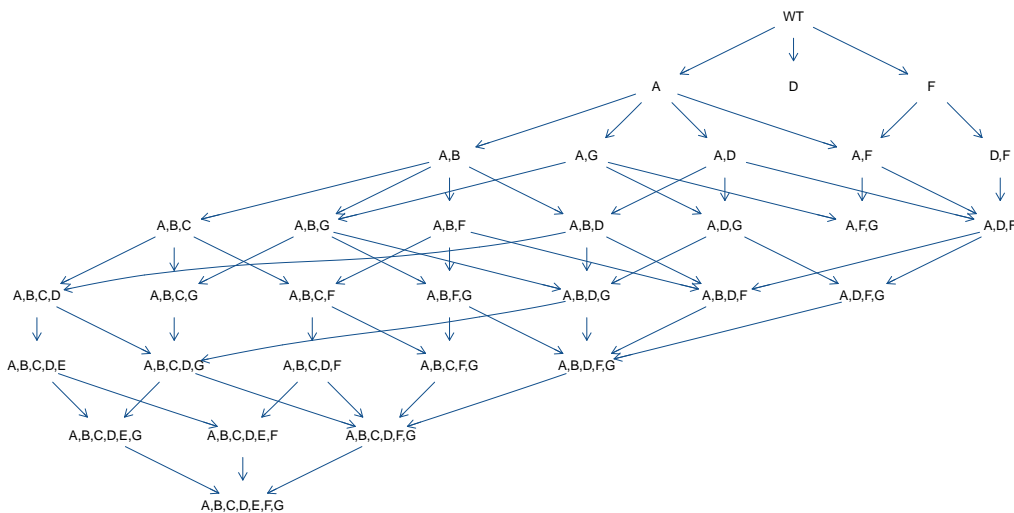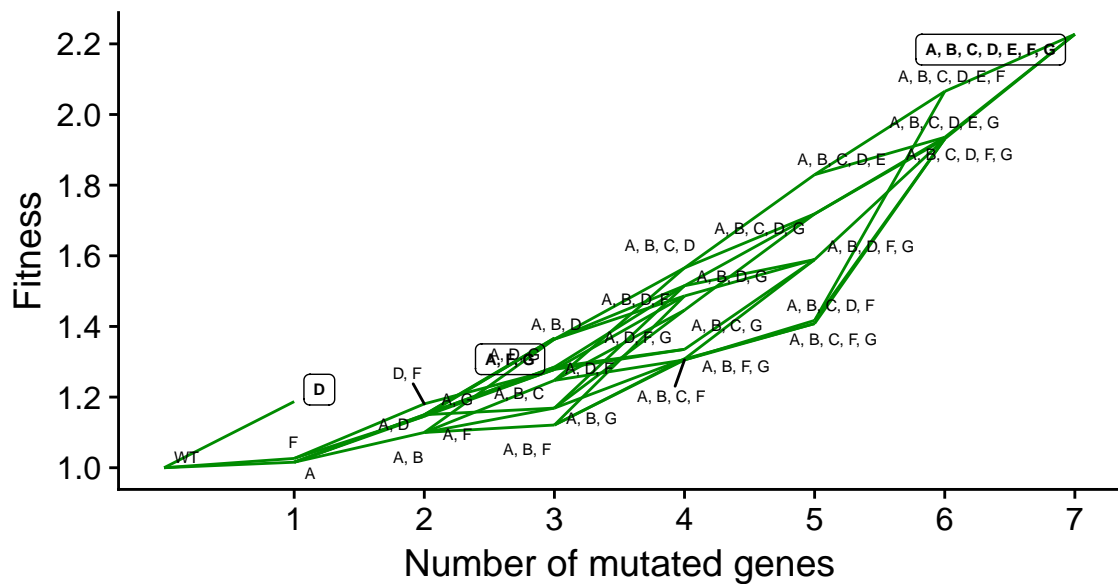



*ID* ANTtoA35KKWUX10uQ  
*acc genotypes* 25  
*peaks no back* 3  
*removed edges* 5  
*prop rem edges* 0.106

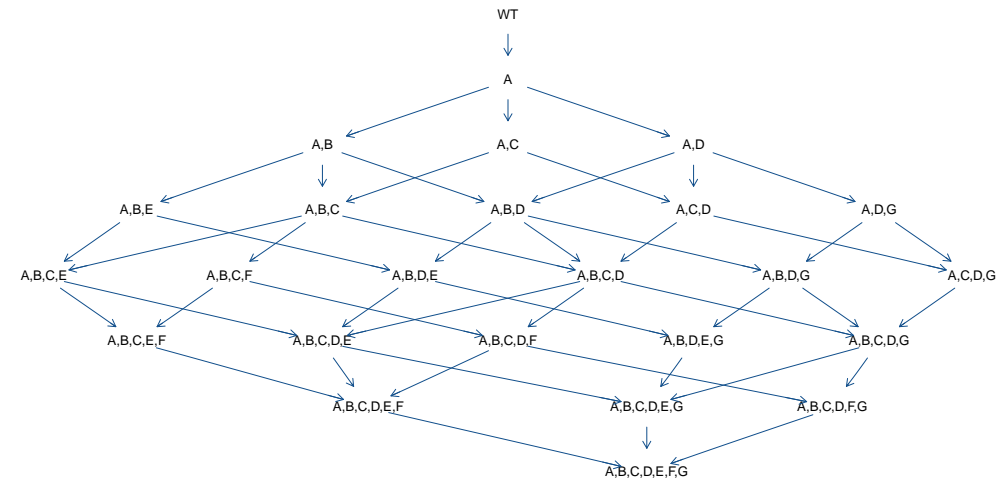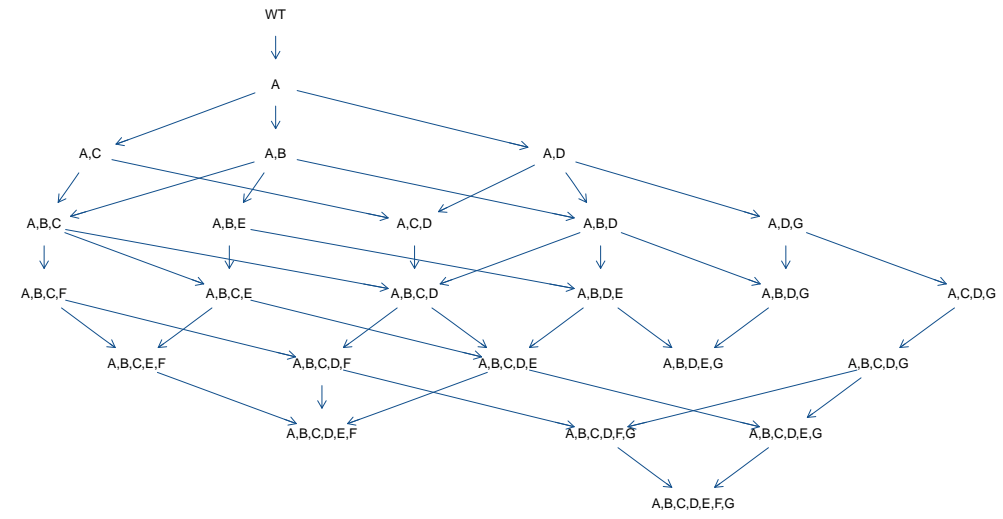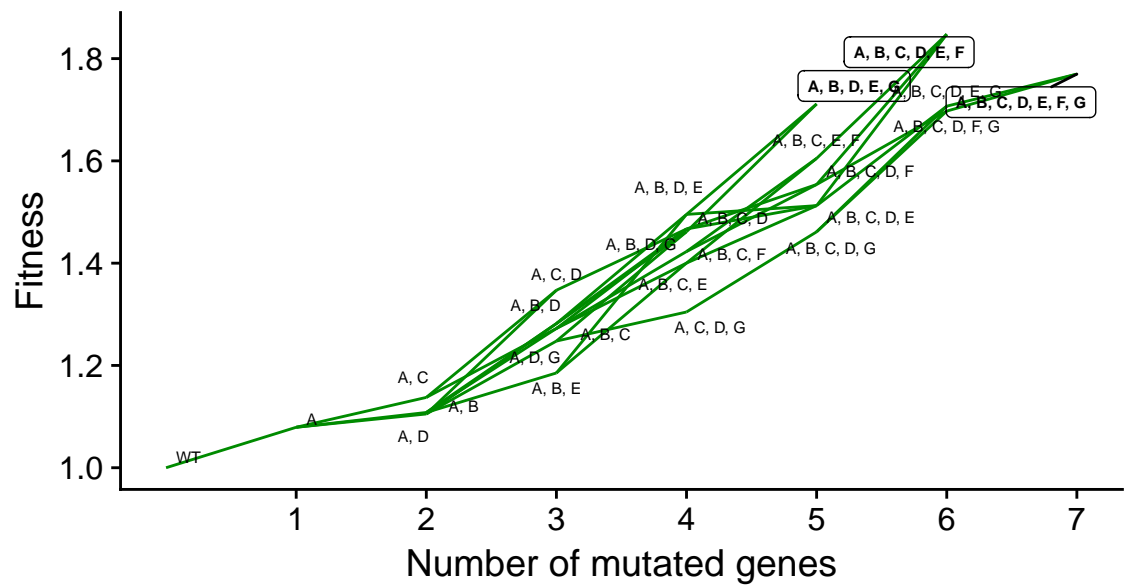



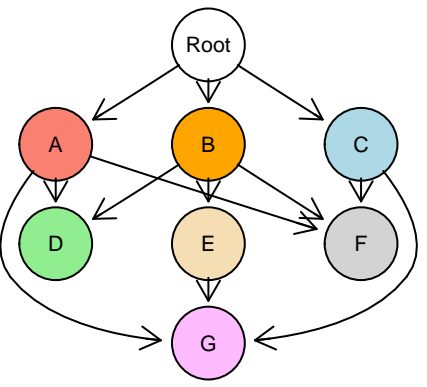

*ID* Asdds4Nn2MDRrNBH  
*acc genotypes* 24  
*peaks no back* 5  
*removed edges* 6  
*prop rem edges* 0.136

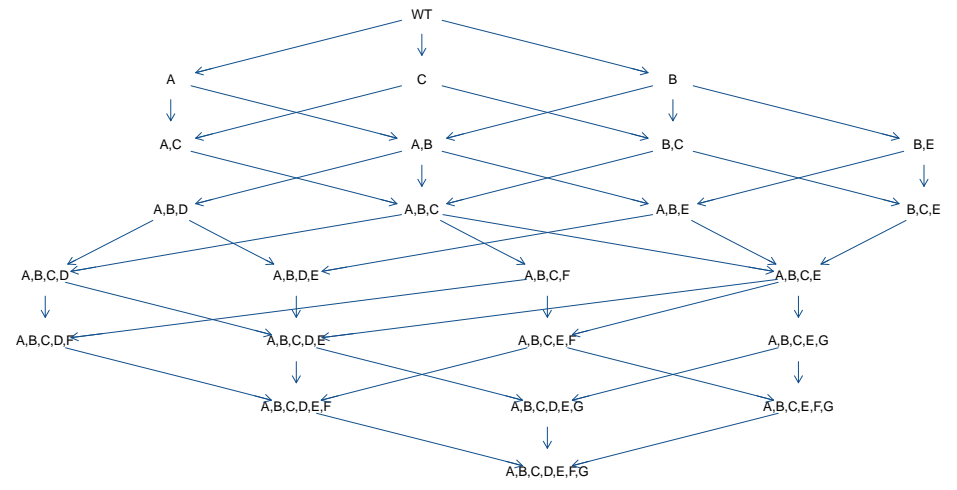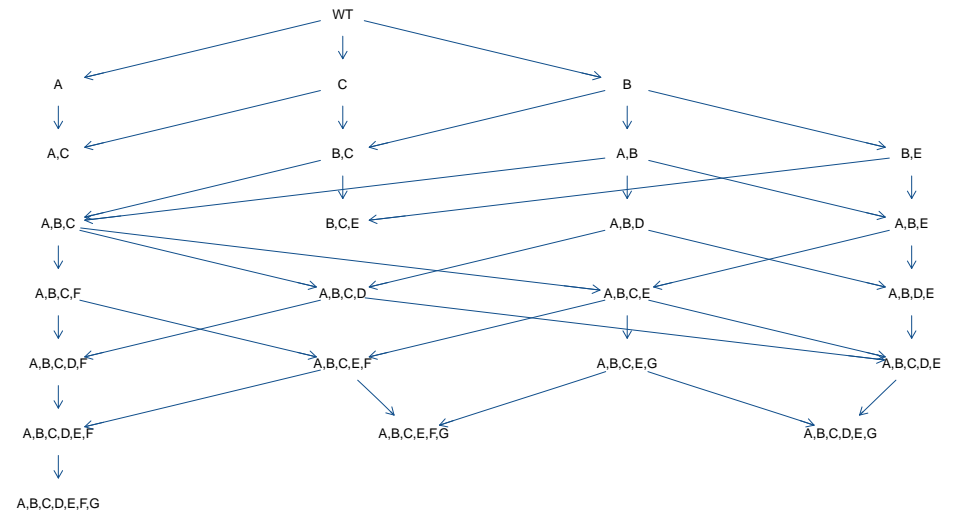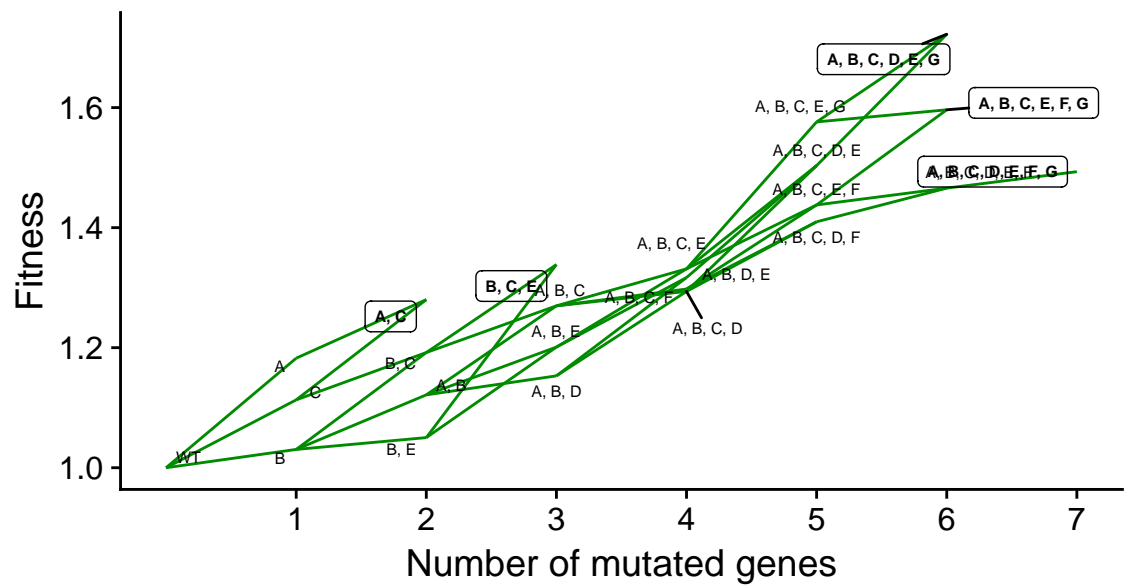

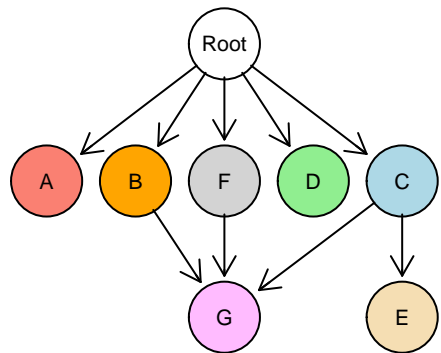

ID [aW6TSVzKS8gXsaxO](#)  
 acc genotypes 56  
 peaks no back 7  
 removed edges 28  
 prop rem edges 0.189

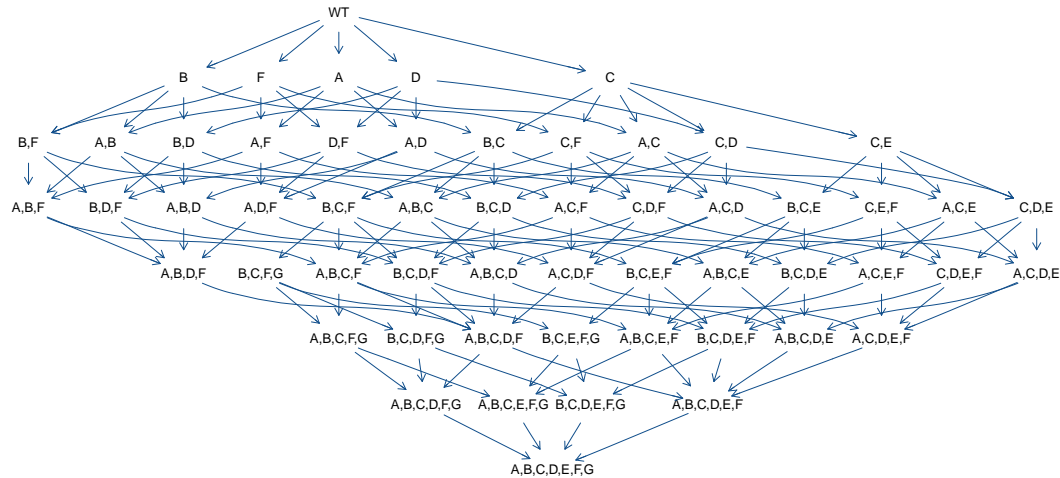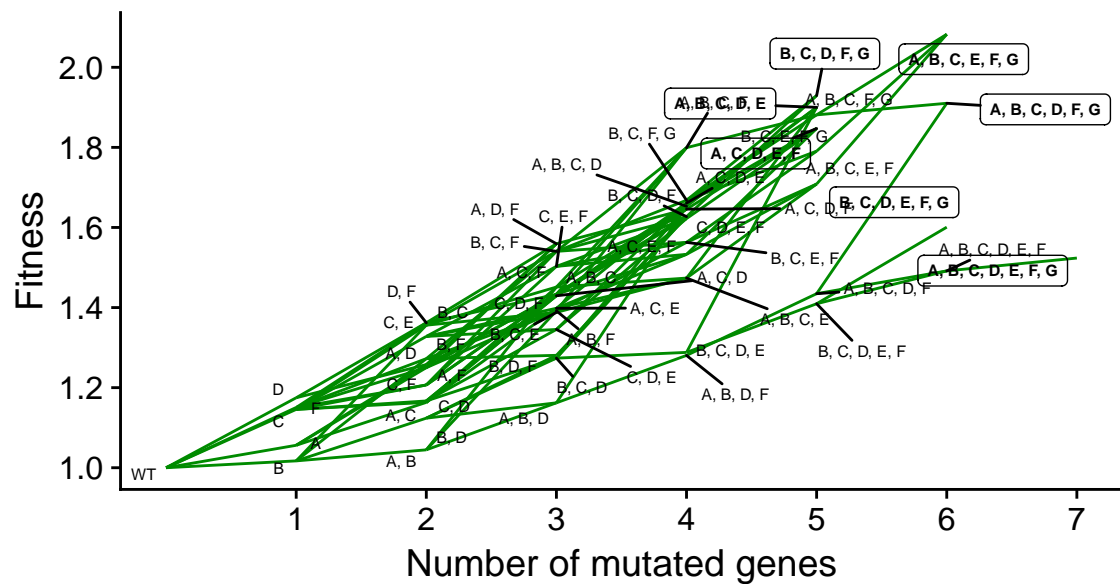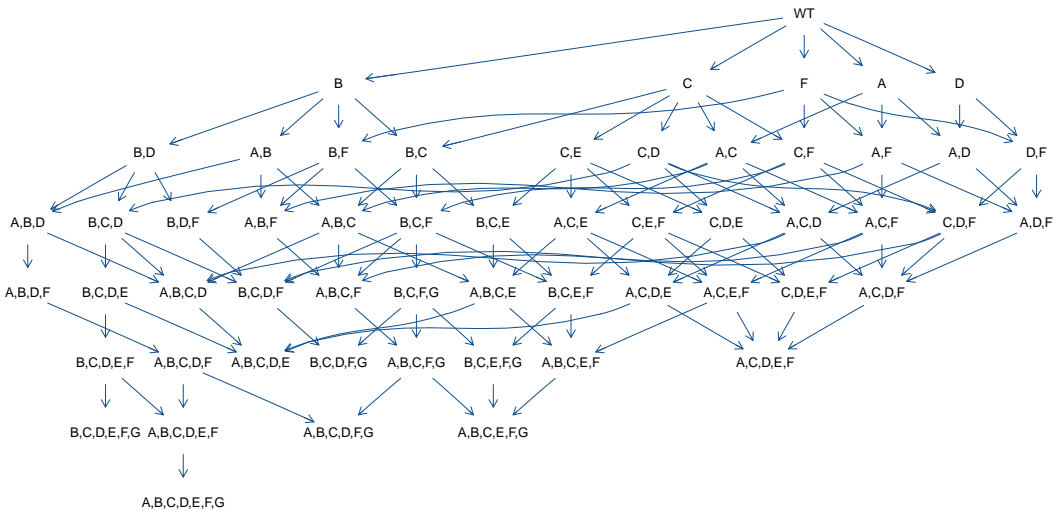

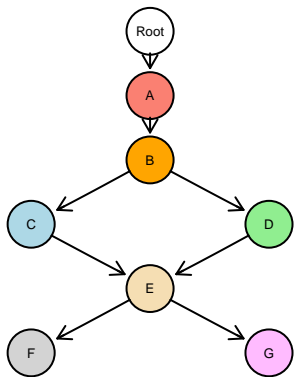

ID **AXnGmWZxzz5kfly4**  
 acc genotypes **10**  
 peaks no back **2**  
 removed edges **1**  
 prop rem edges **0.091**

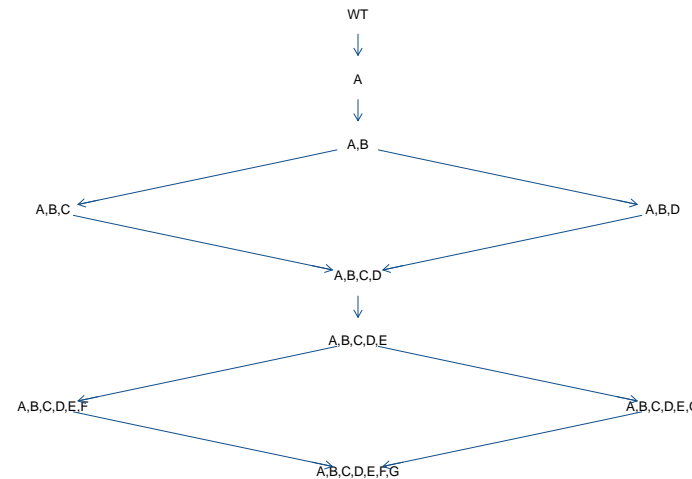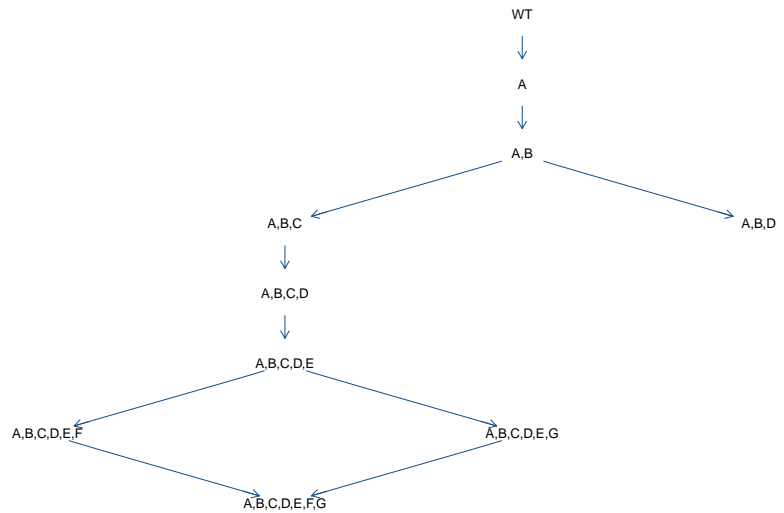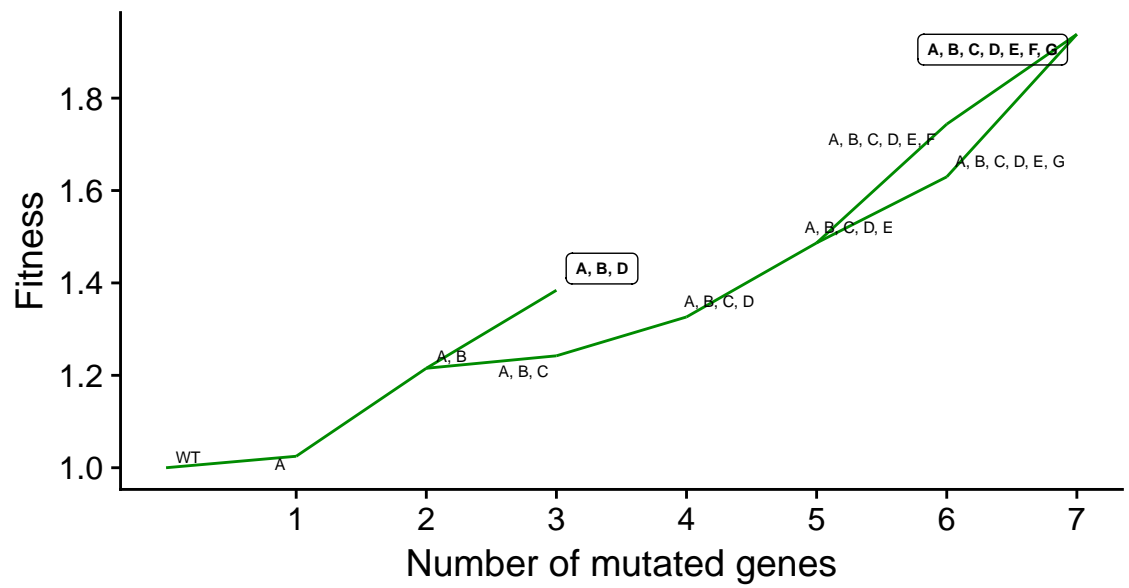

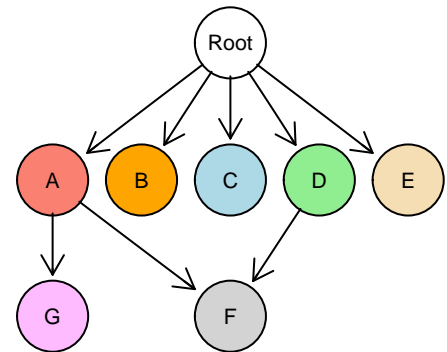

ID AYflkixUEKLpymWH  
 acc genotypes 64  
 peaks no back 9  
 removed edges 33  
 prop rem edges 0.188

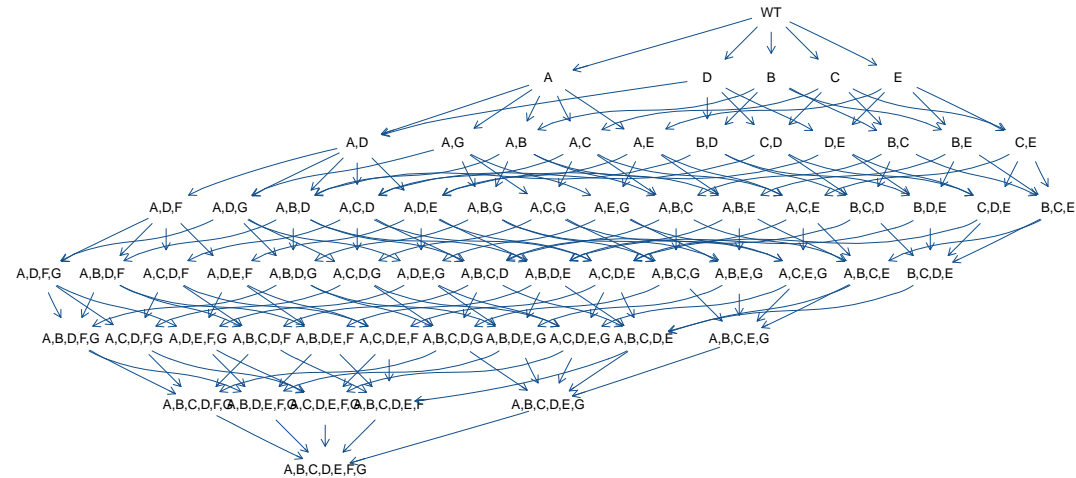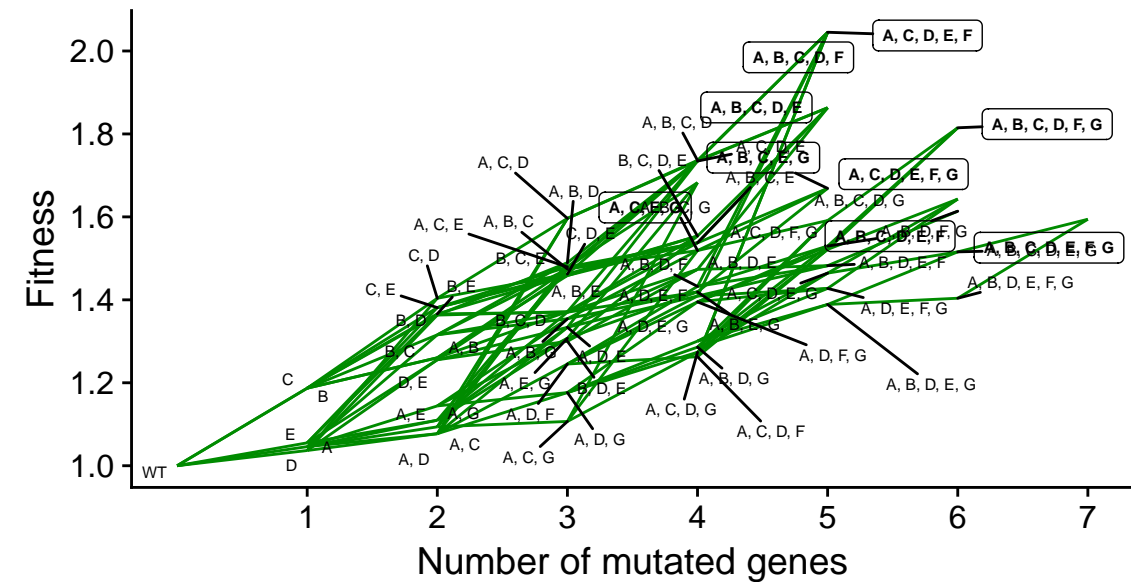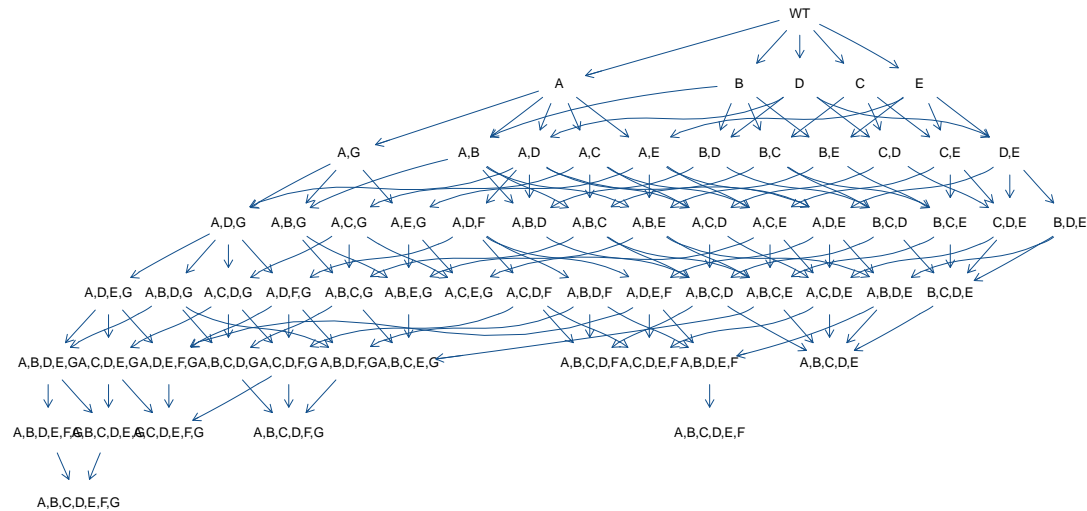

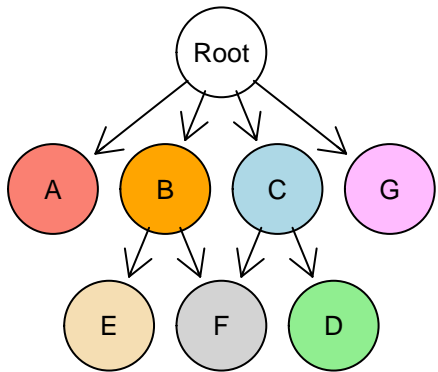

ID **b8dcfCJtzgN6gupz**  
 acc genotypes **52**  
 peaks no back **7**  
 removed edges **20**  
 prop rem edges **0.152**

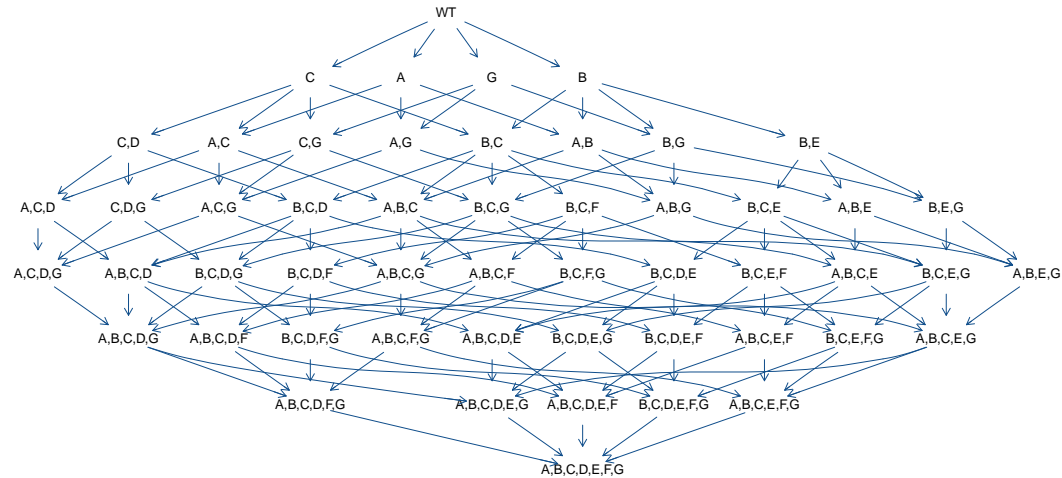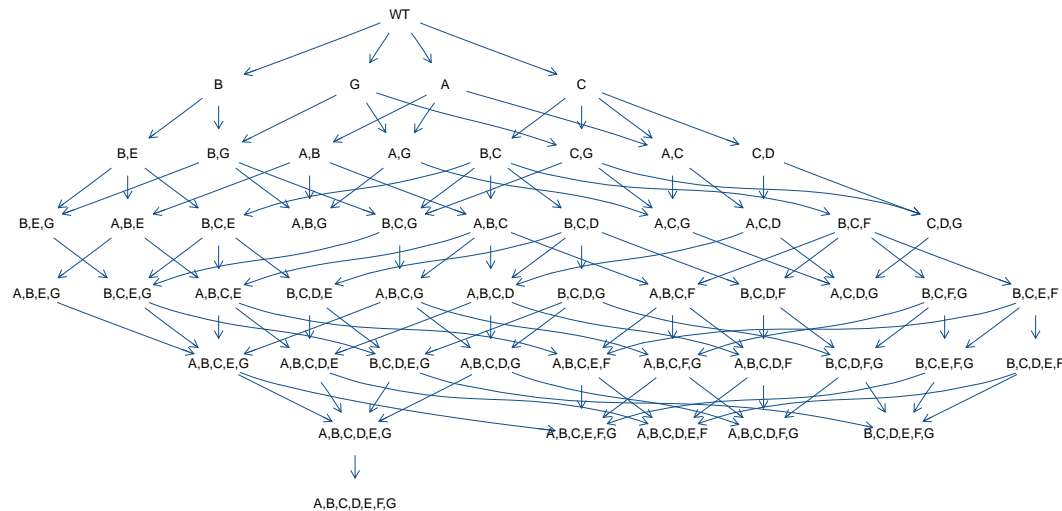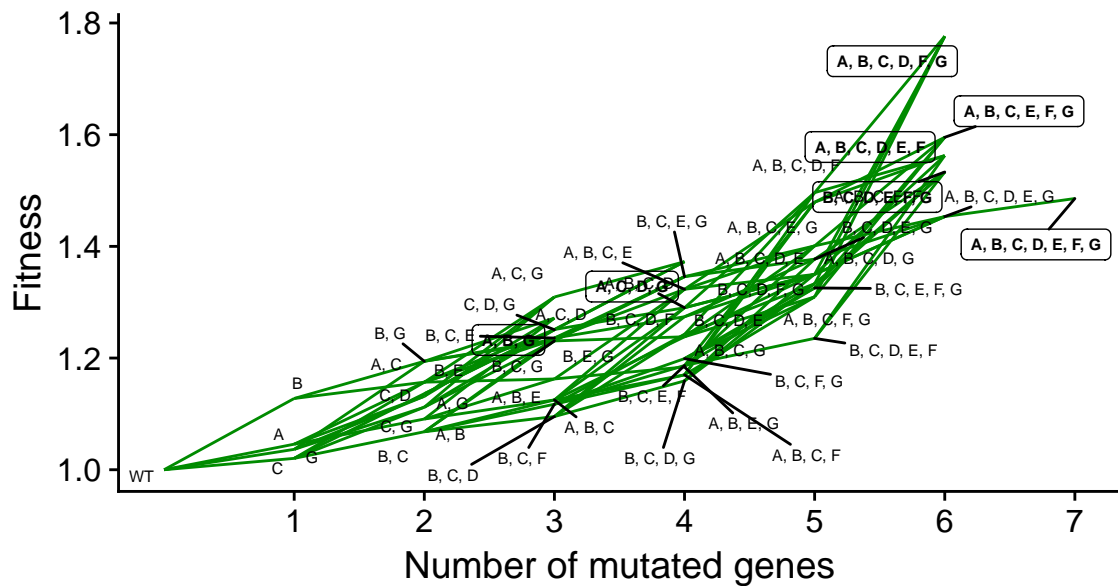

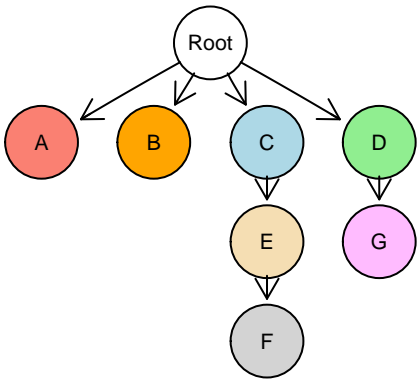

ID **b91s8fHjp10RnRLDw**  
 acc genotypes **48**  
 peaks no back **8**  
 removed edges **25**  
 prop rem edges **0.216**

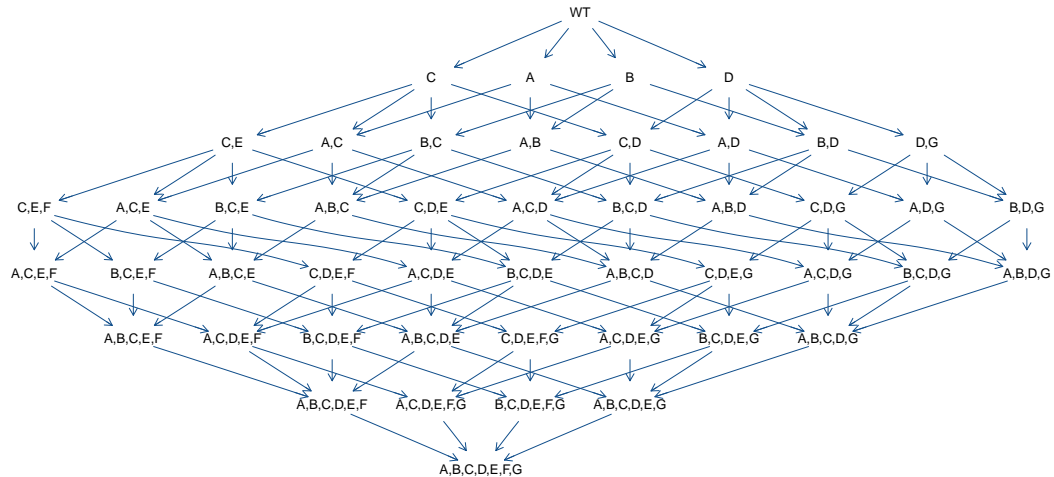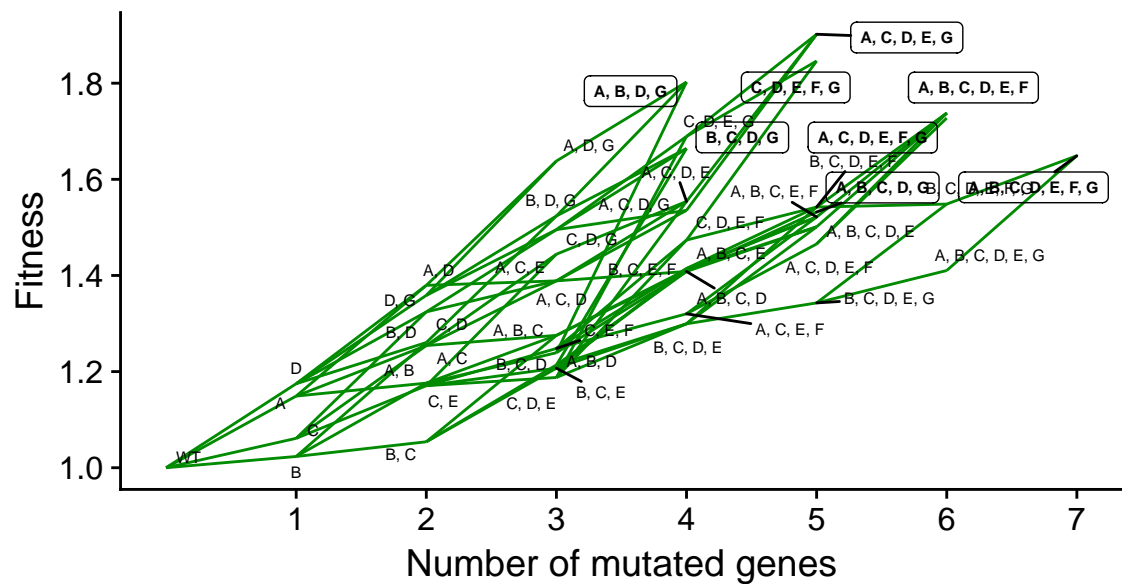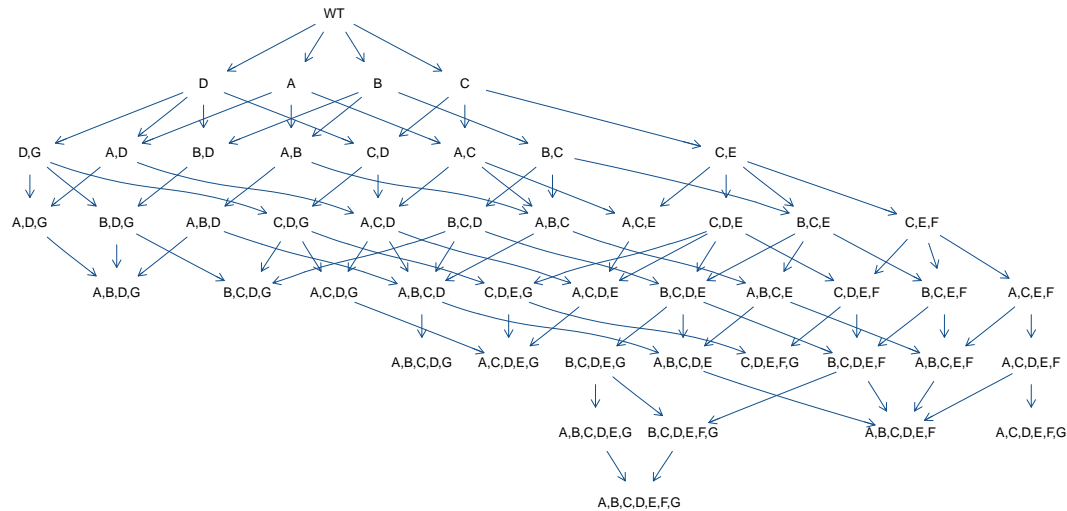

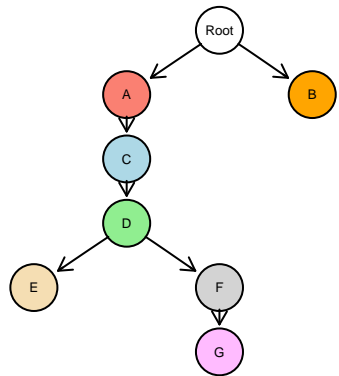

ID **bAM8Odp4yapUk10Fb**  
 acc genotypes **18**  
 peaks no back 4  
 removed edges 4  
 prop rem edges 0.138

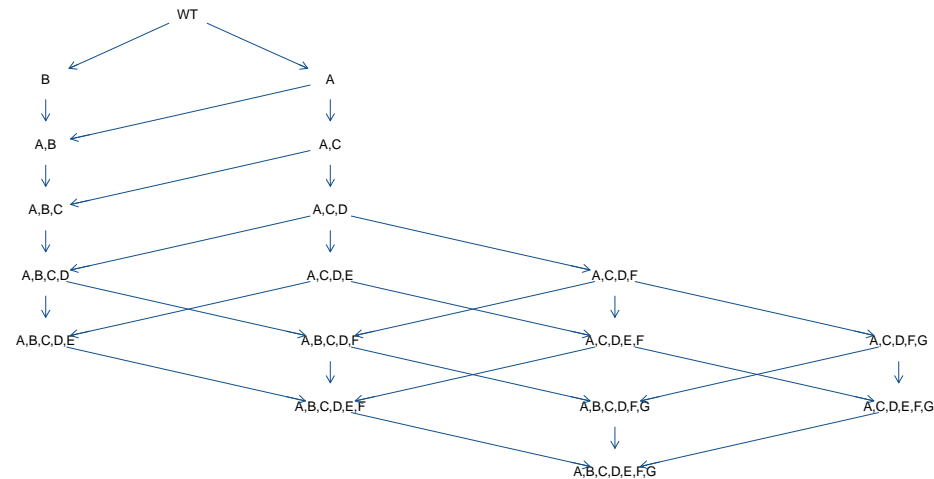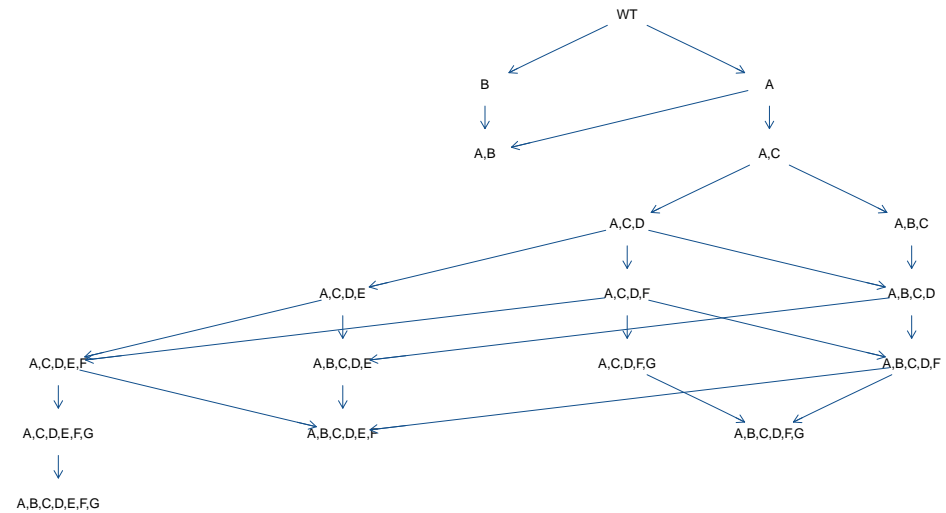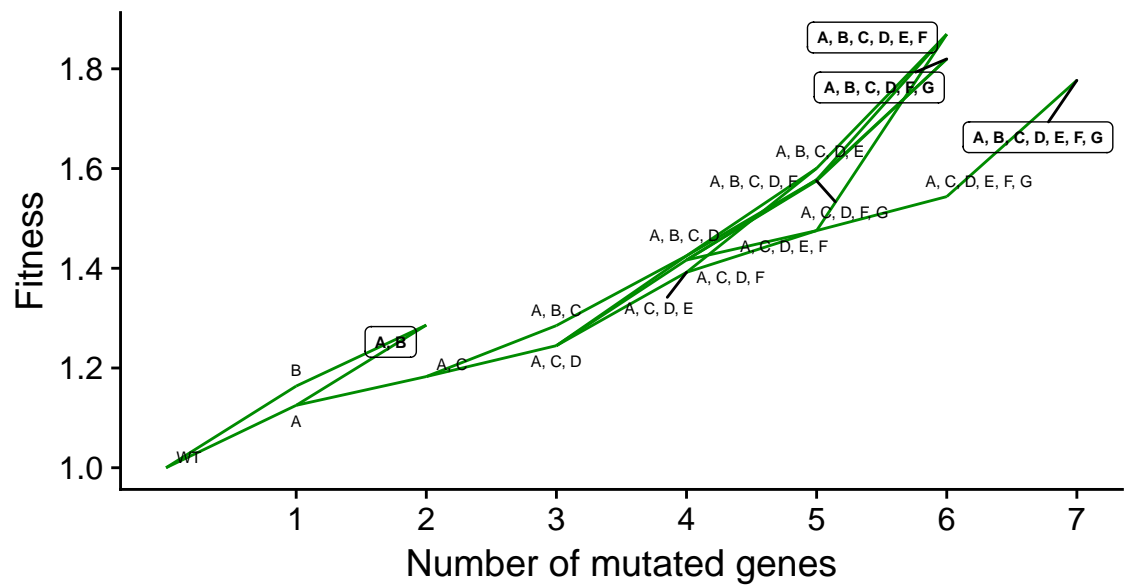

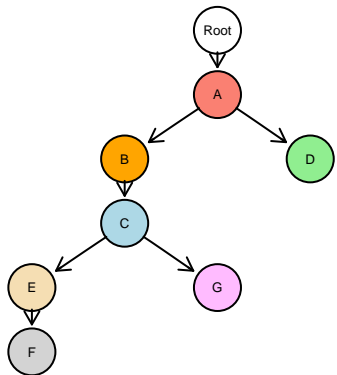

ID **bCsk2Qo5VMVm55fM**  
 acc genotypes **17**  
 peaks no back **2**  
 removed edges **3**  
 prop rem edges **0.111**

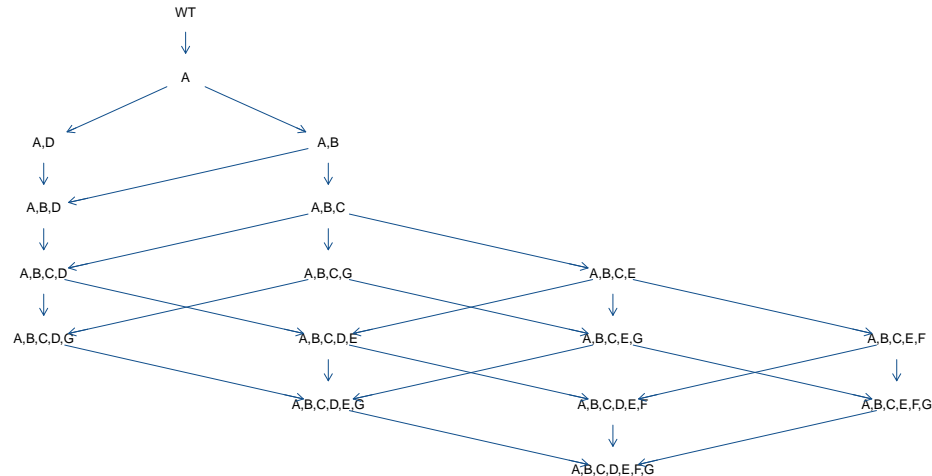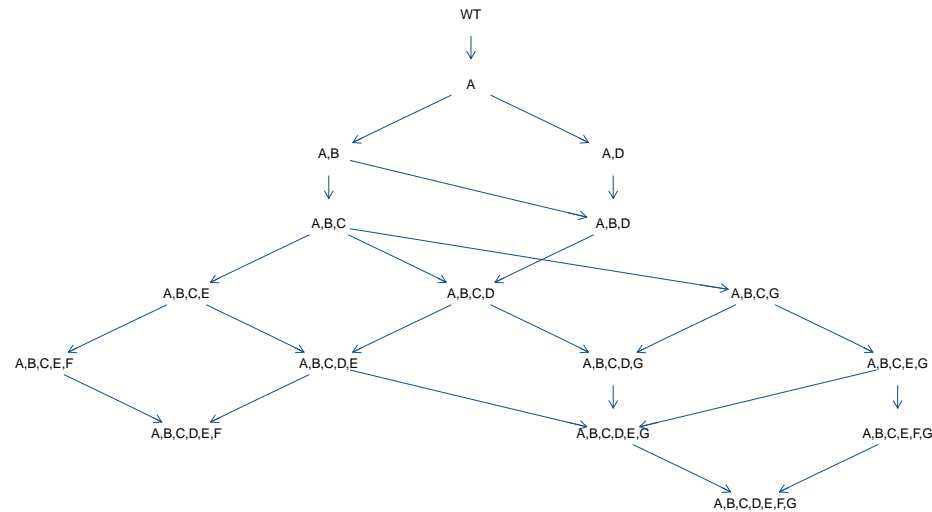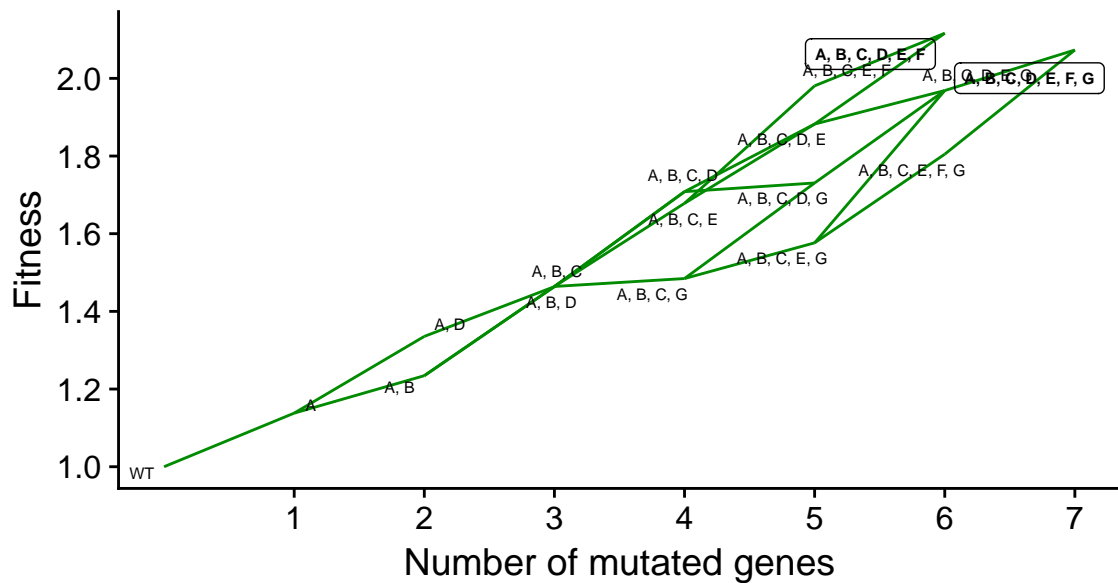



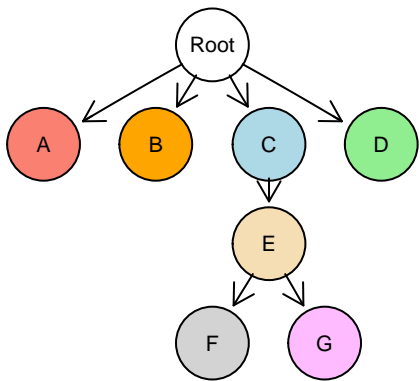

ID **BesktlGyEmSHnwS9**  
 acc genotypes **48**  
 peaks no back **7**  
 removed edges **26**  
 prop rem edges **0.217**

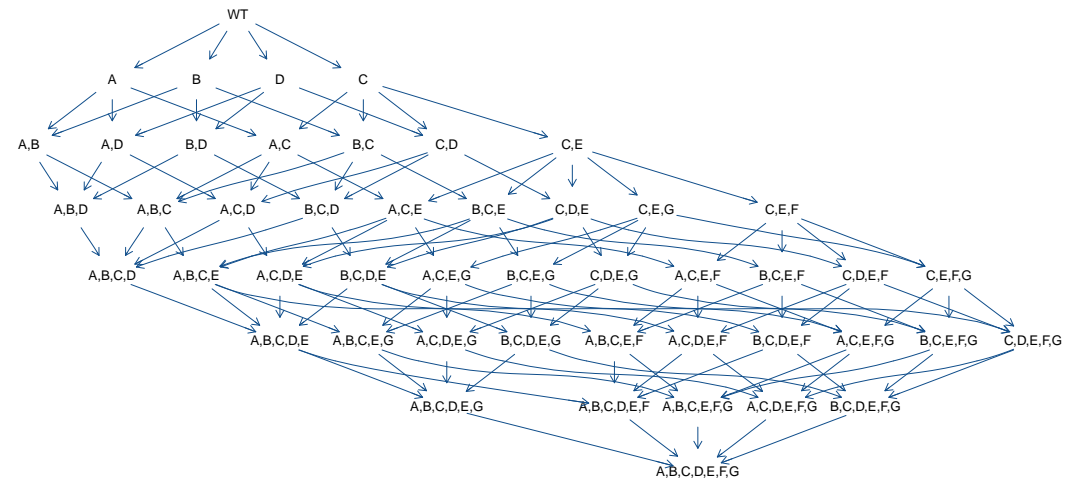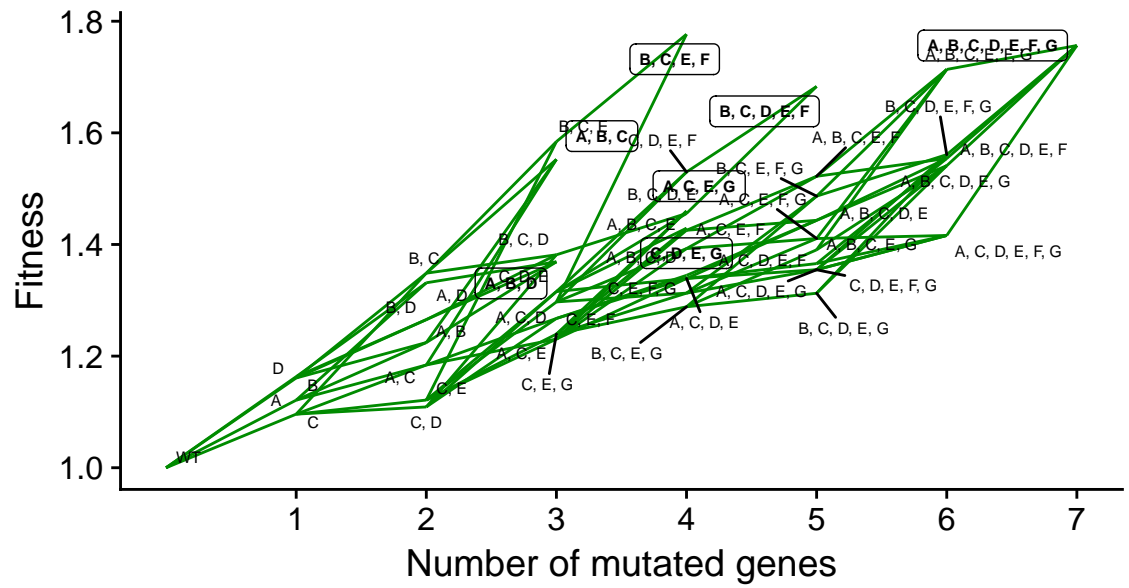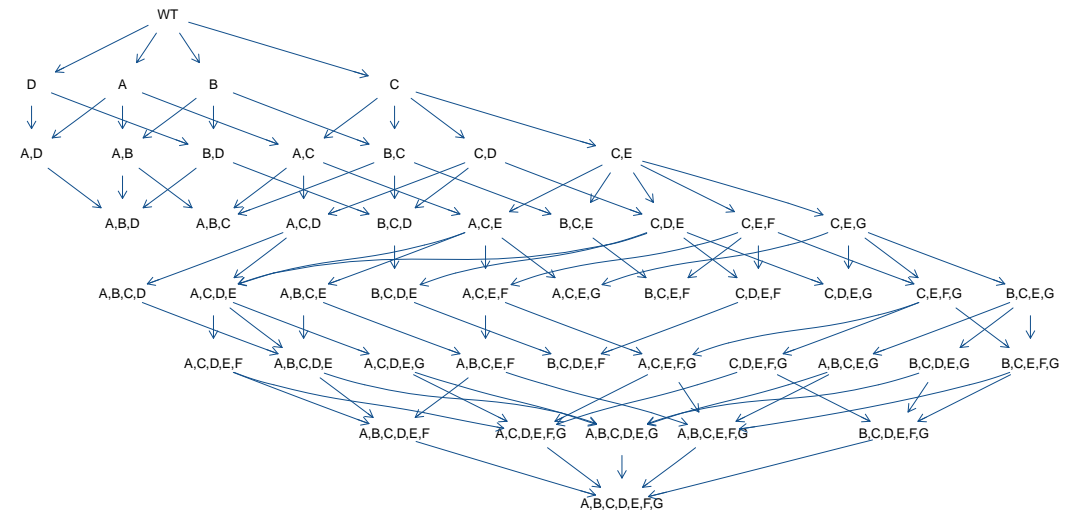

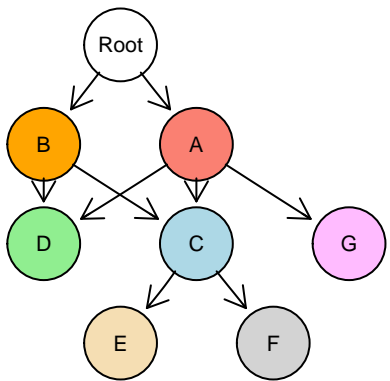

ID **Bm107M6KzXSHrdvsu**  
 acc genotypes **24**  
 peaks no back **2**  
 removed edges **3**  
 prop rem edges **0.065**

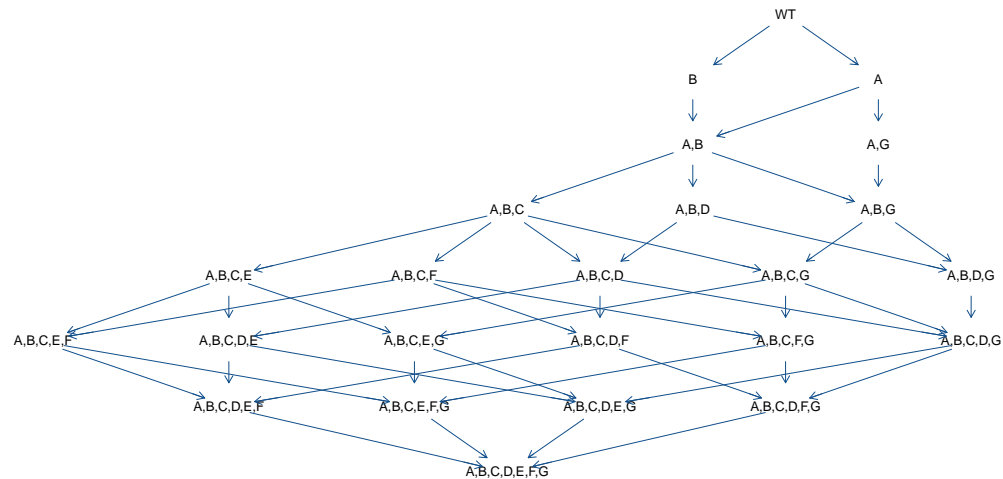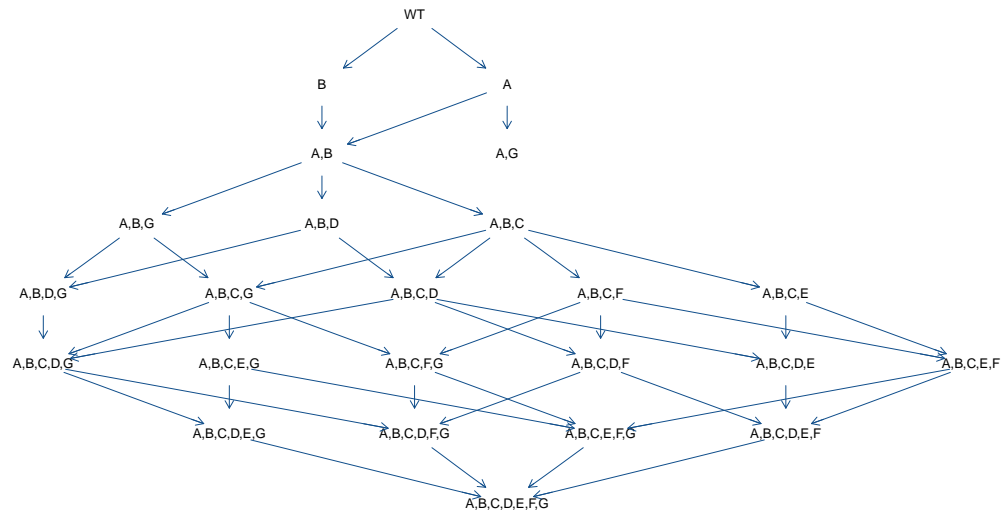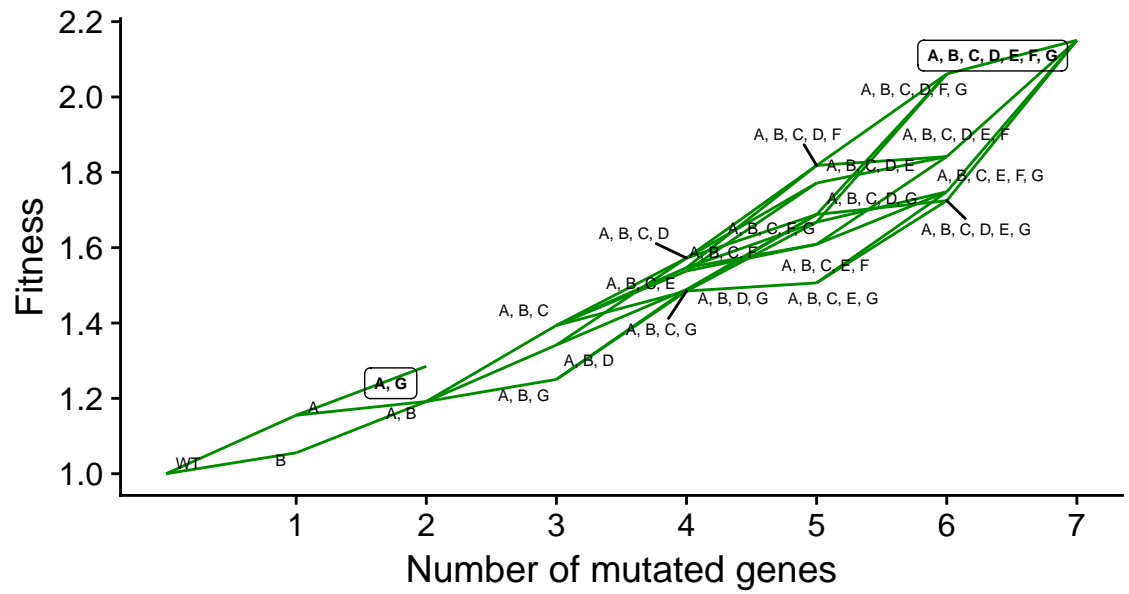

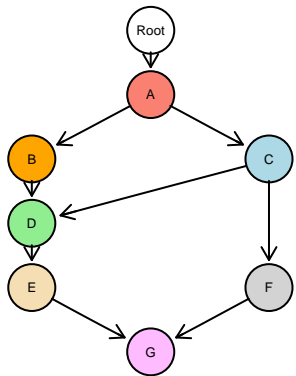

ID **Bm9gSkay114nALeA**  
 acc genotypes **12**  
 peaks no back **2**  
 removed edges **1**  
 prop rem edges **0.067**

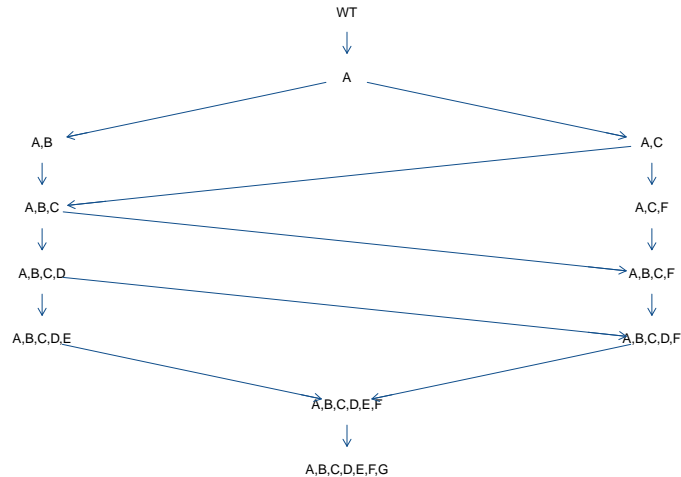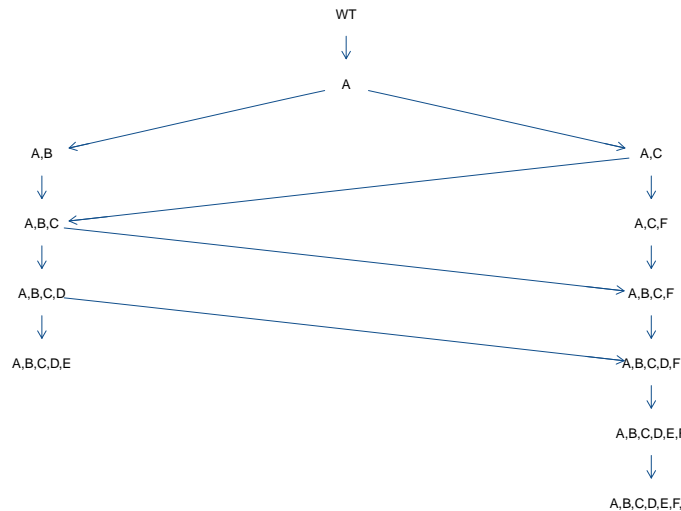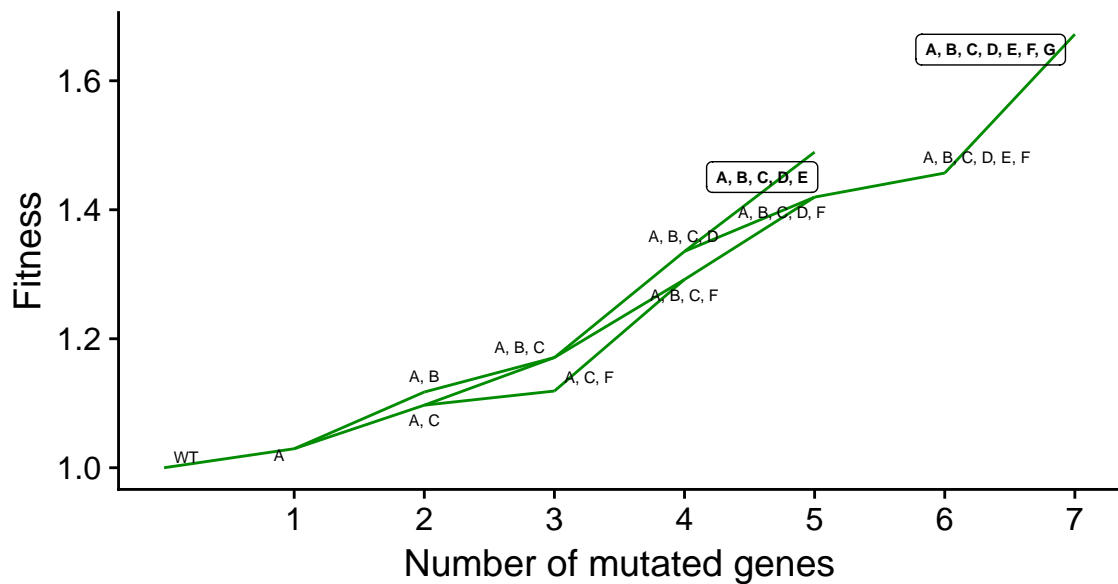

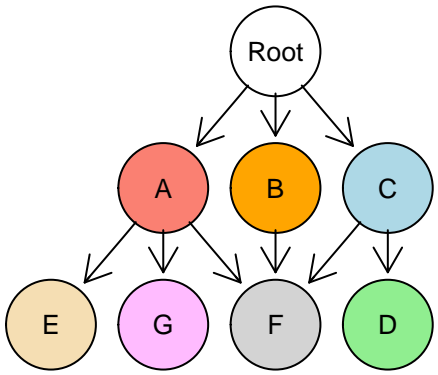

*ID*    bpHispMQCIsXVnvs  
*acc genotypes*    38  
*peaks no back*    6  
*removed edges*    9  
*prop rem edges*    0.106

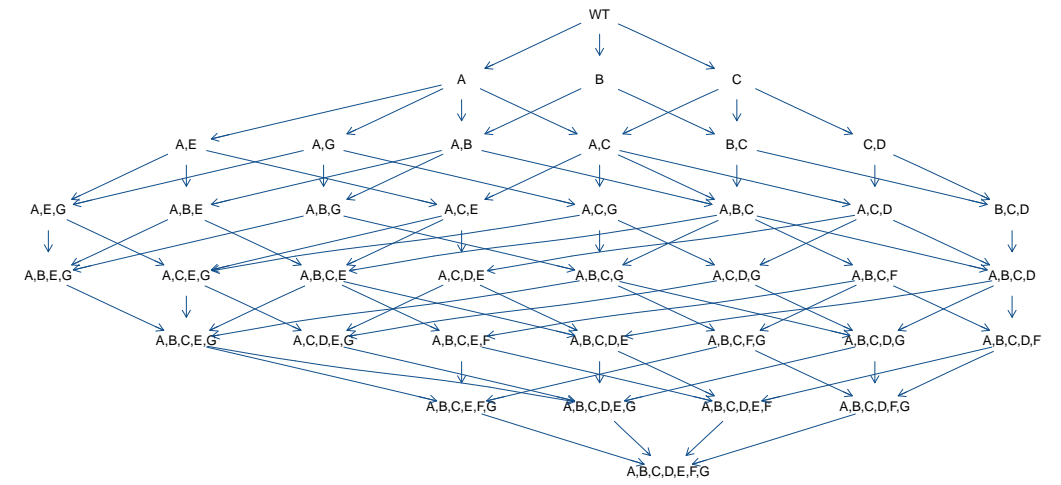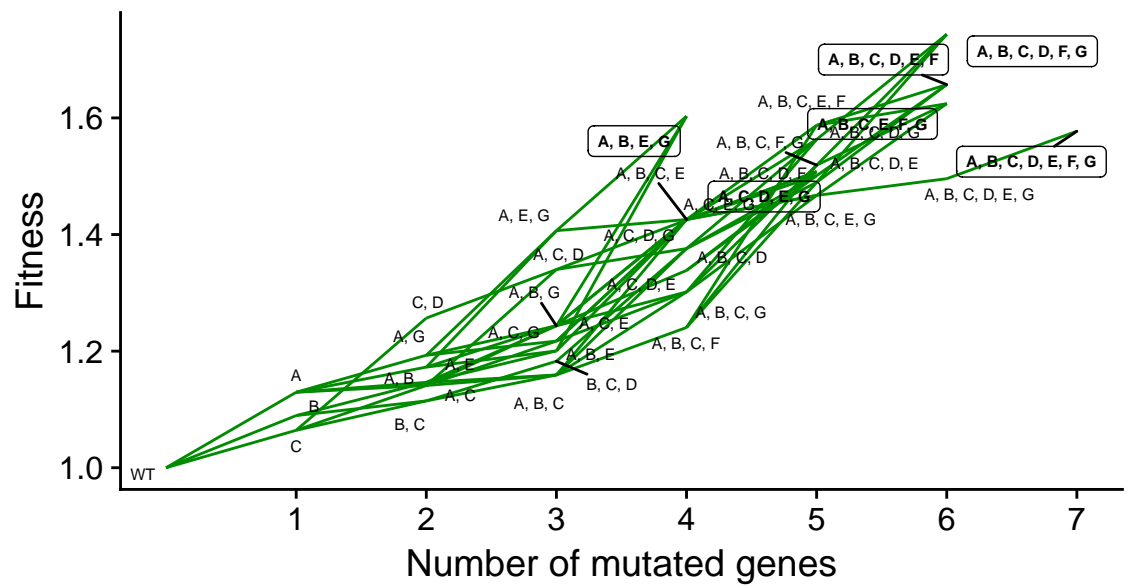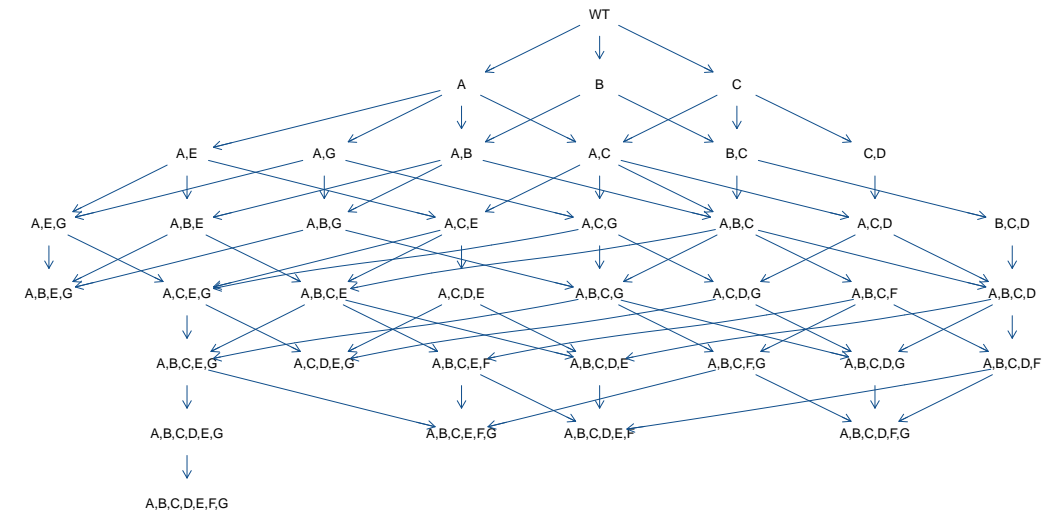

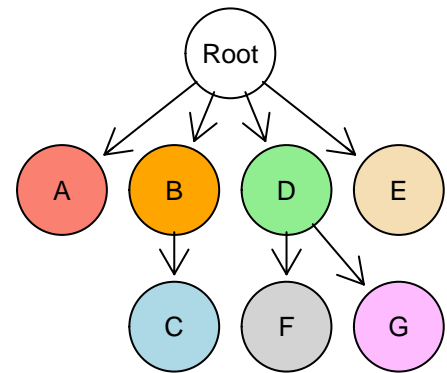

ID **BQW2TKpC1B6DJ7JN**  
 acc genotypes **60**  
 peaks no back **4**  
 removed edges **27**  
 prop rem edges **0.169**

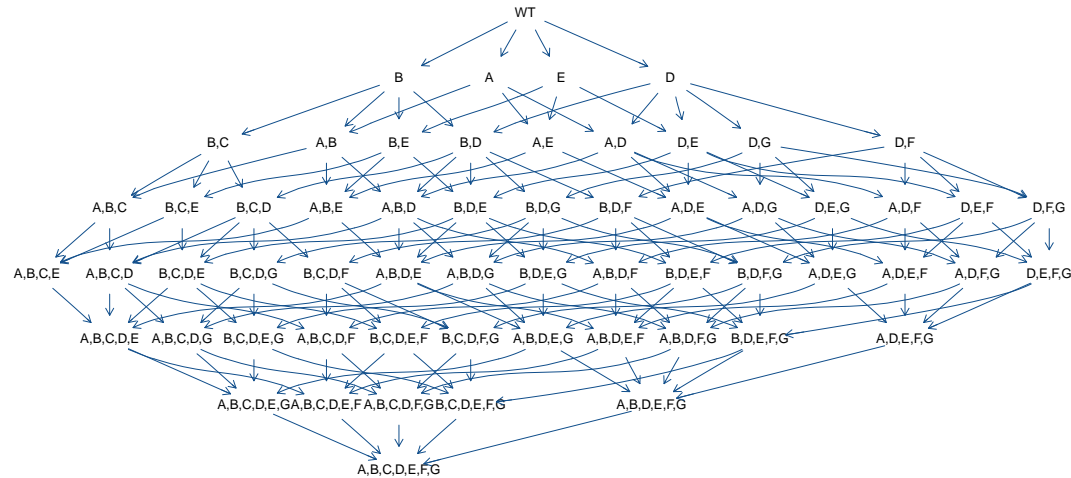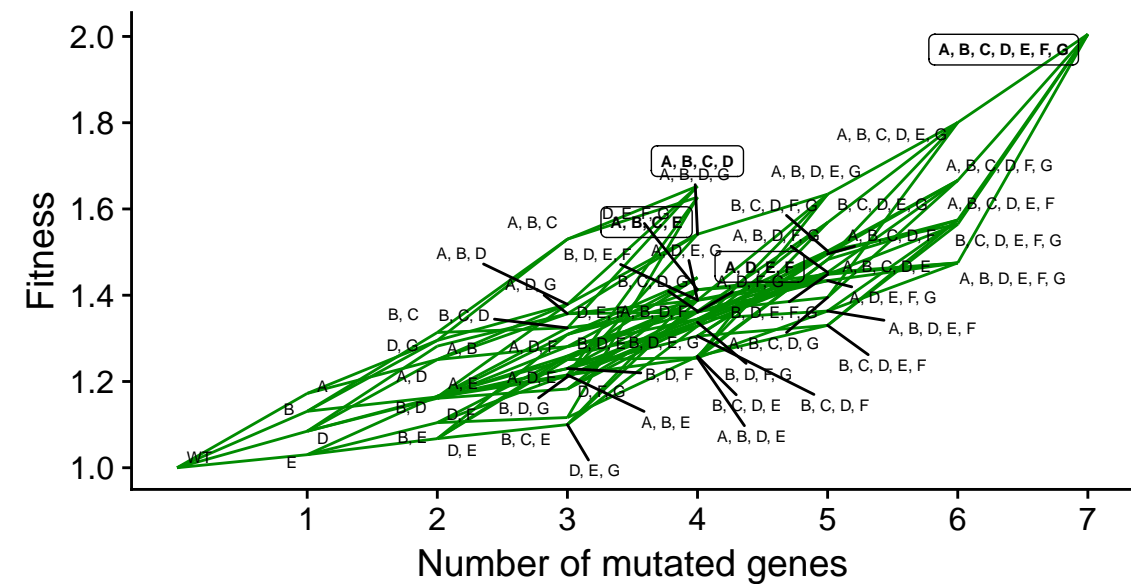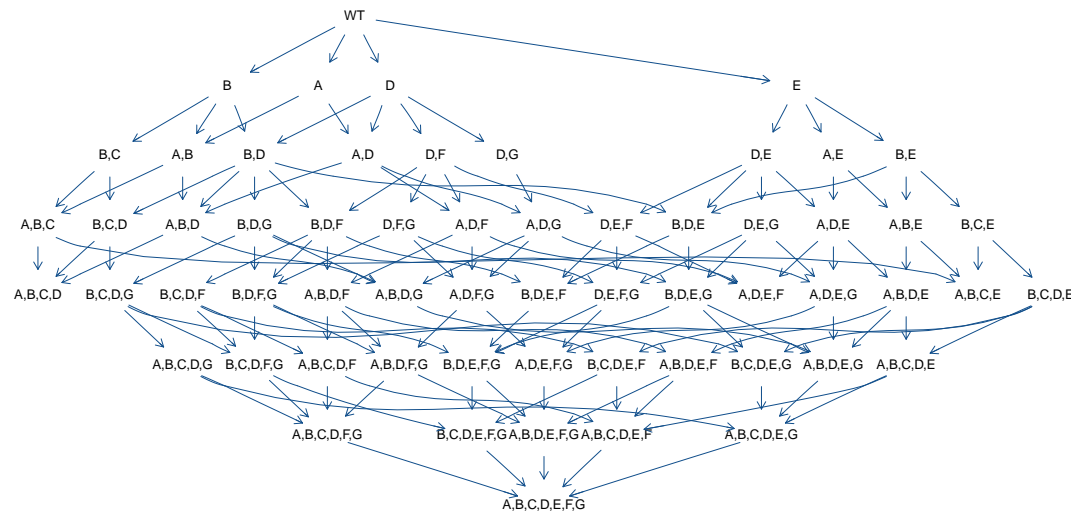

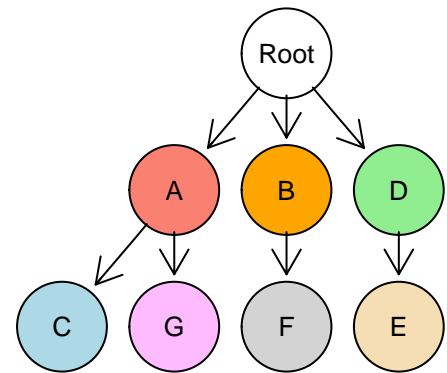

*ID* BXIHohn6cCcfid6nR  
*acc genotypes* 45  
*peaks no back* 8  
*removed edges* 20  
*prop rem edges* 0.19

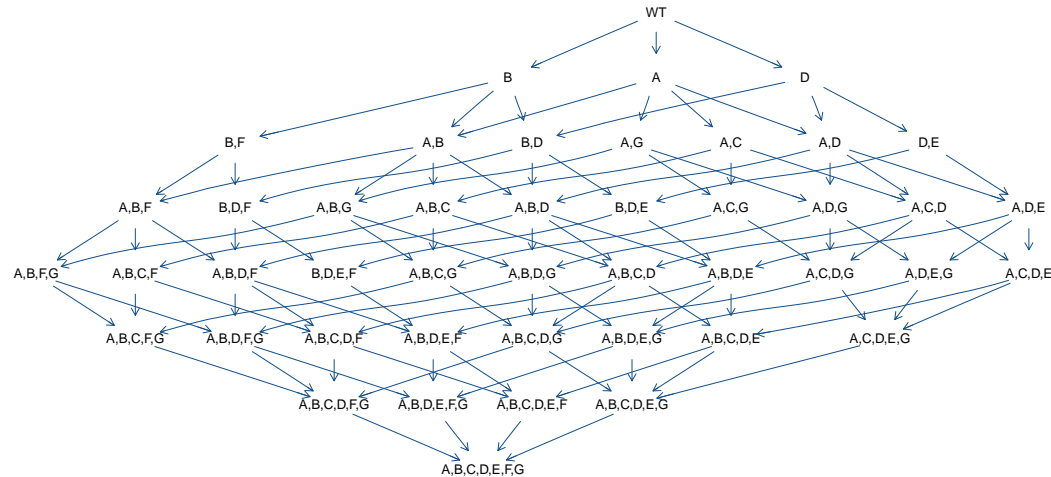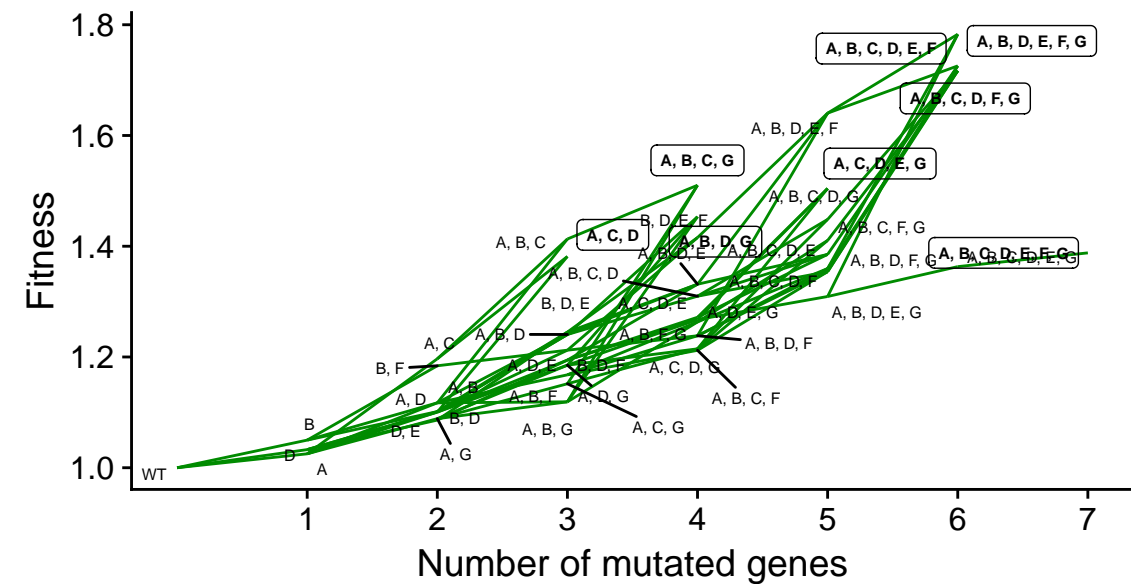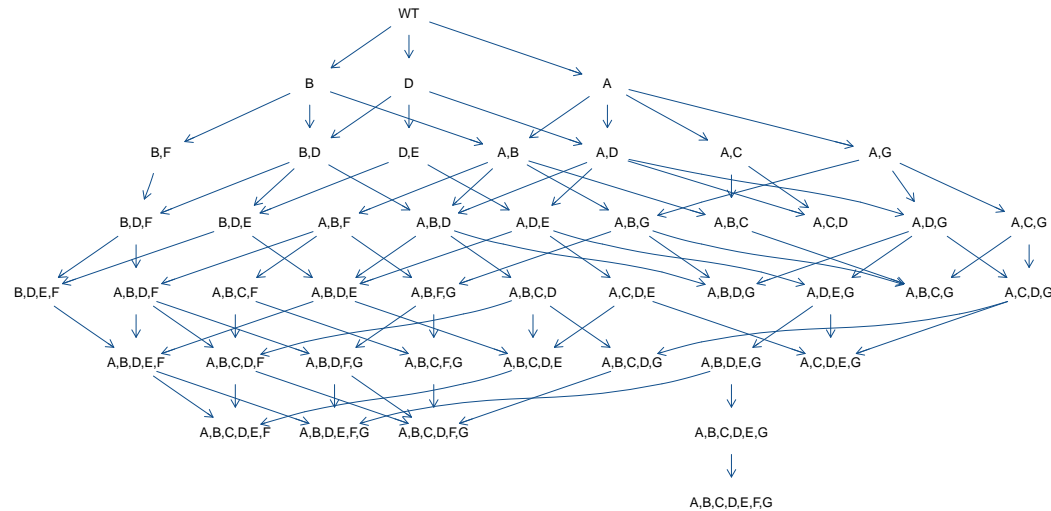

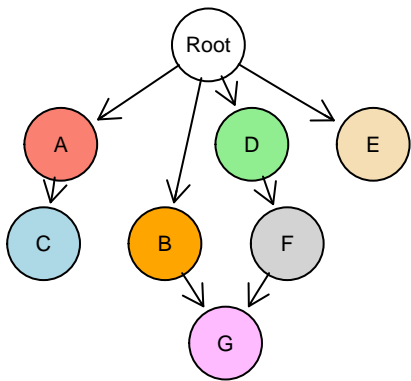

ID BzCzics10JlcdE1020  
 acc genotypes 42  
 peaks no back 6  
 removed edges 16  
 prop rem edges 0.165

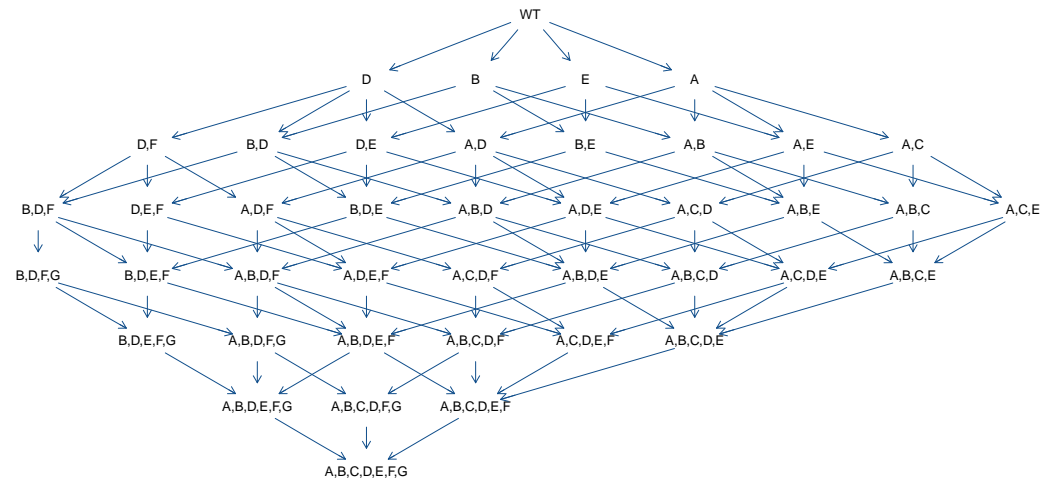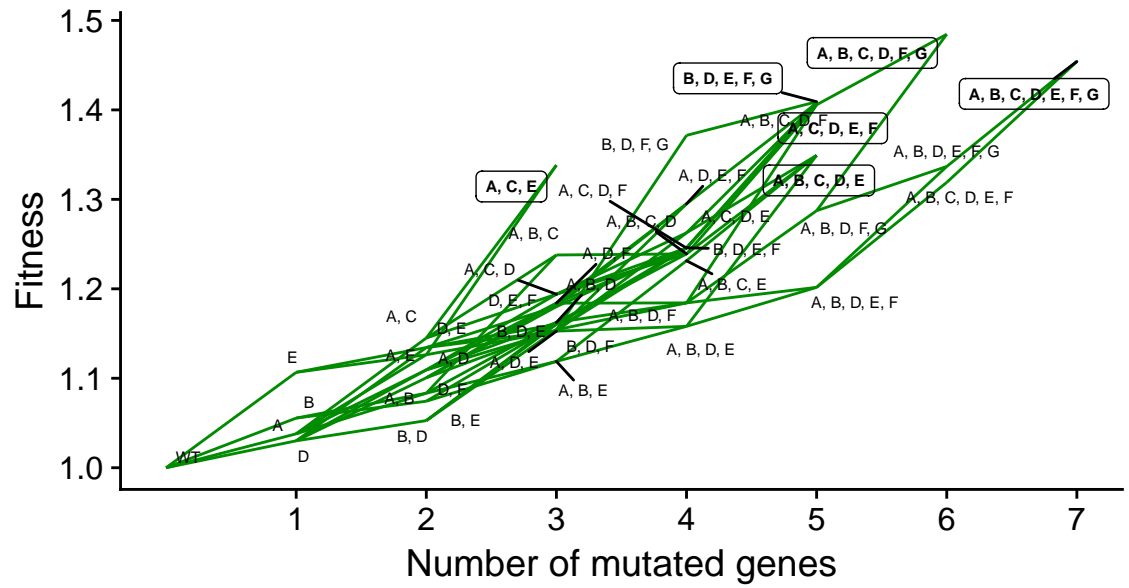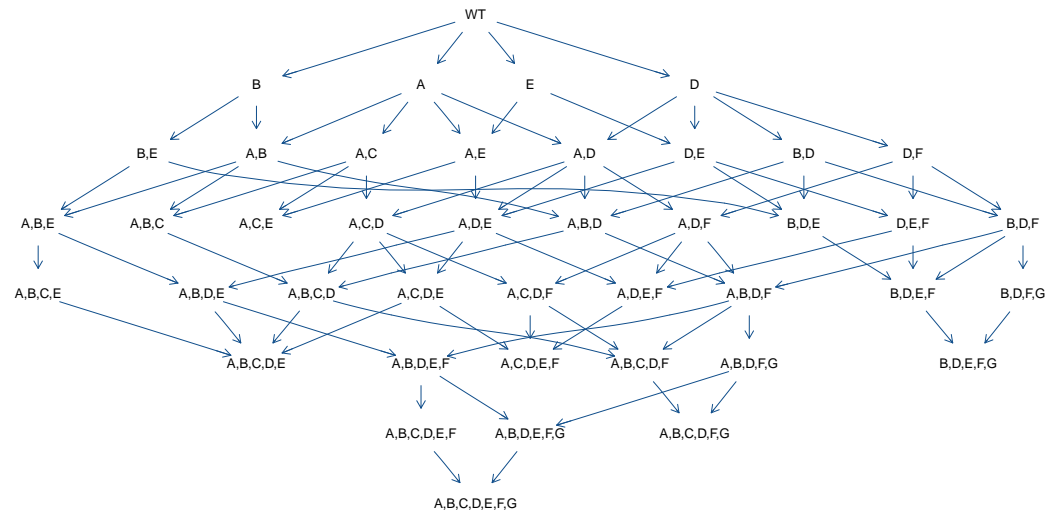

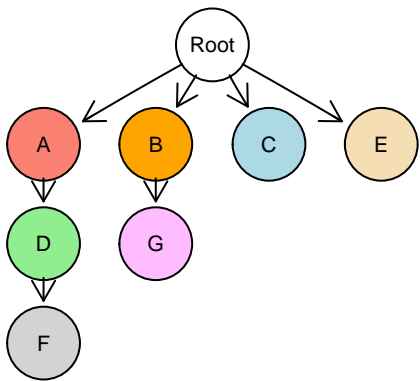

*ID* c9GVdRVUtkHv3yR7  
*acc genotypes* 48  
*peaks no back* 4  
*removed edges* 23  
*prop rem edges* 0.198

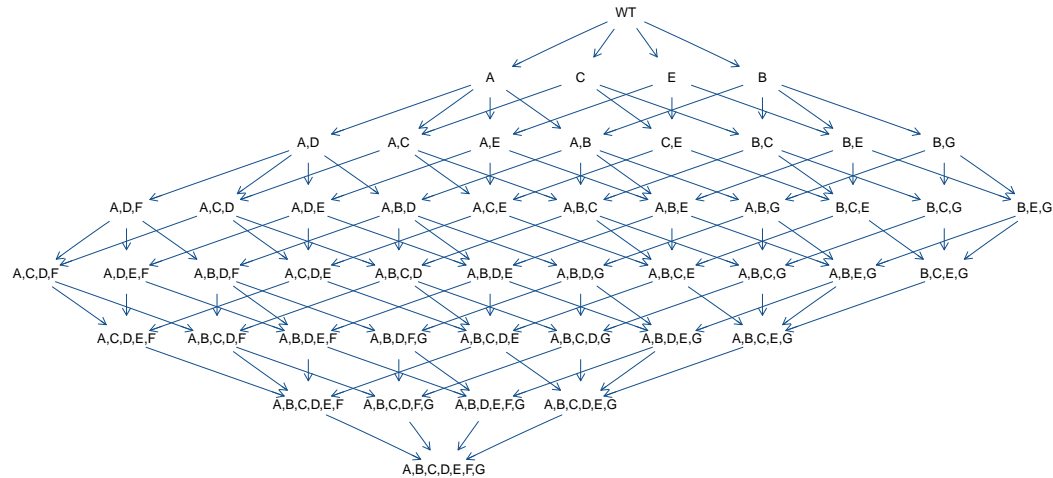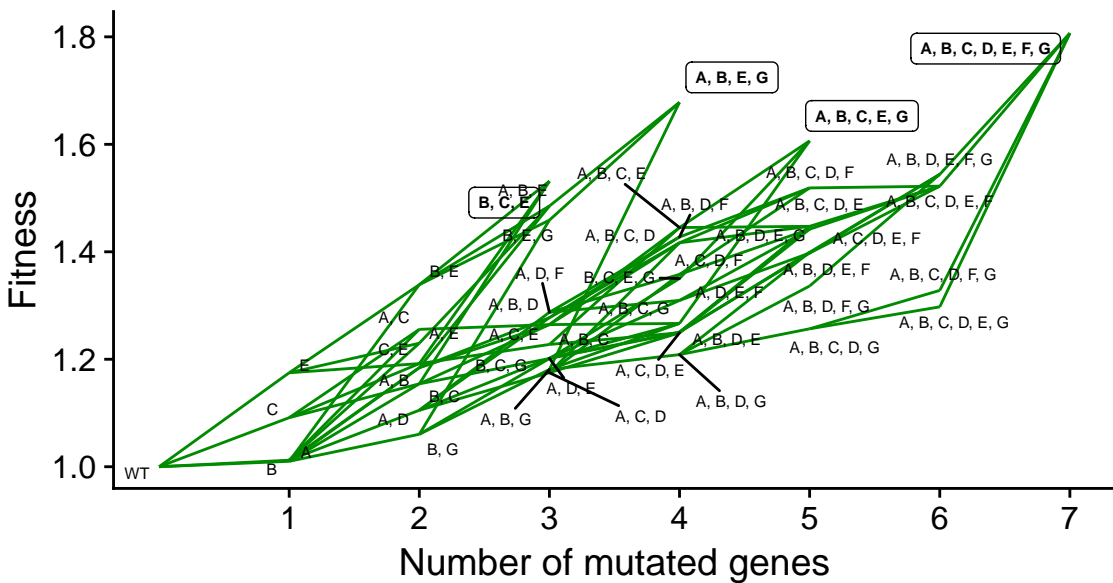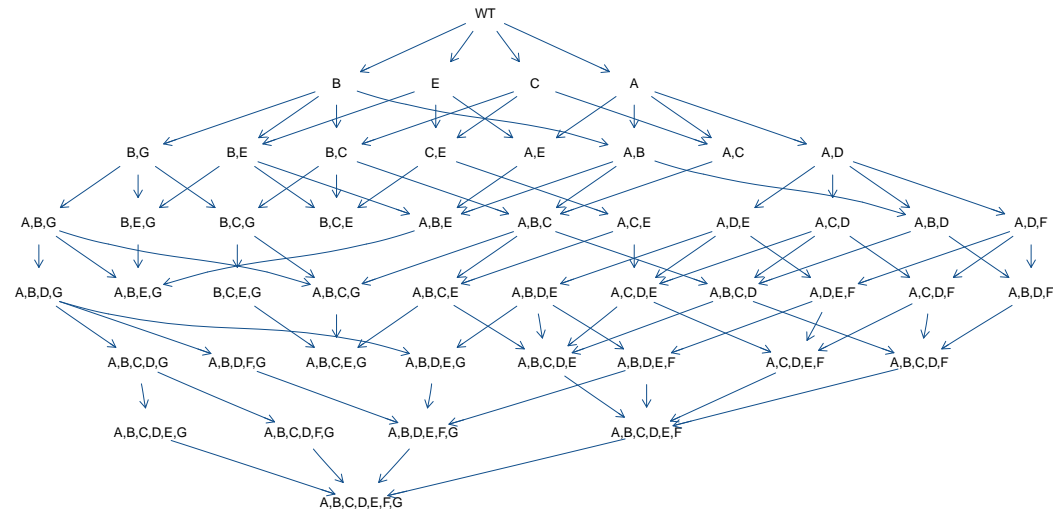



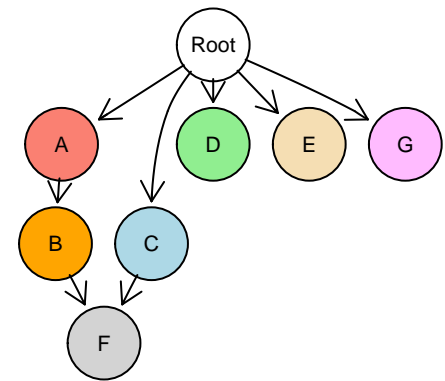

*ID* C9MQvf10YWmVwuUpW  
*acc genotypes* 56  
*peaks no back* 9  
*removed edges* 32  
*prop rem edges* 0.216

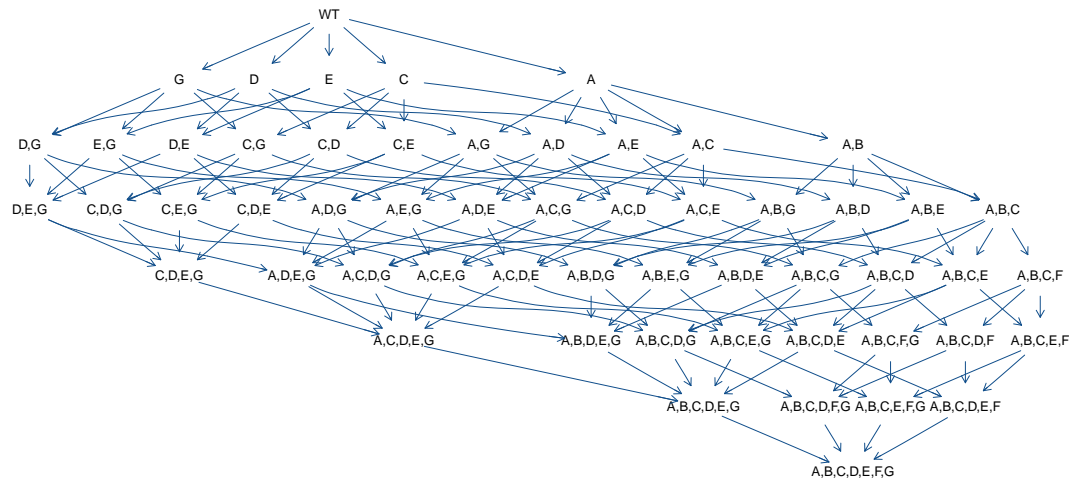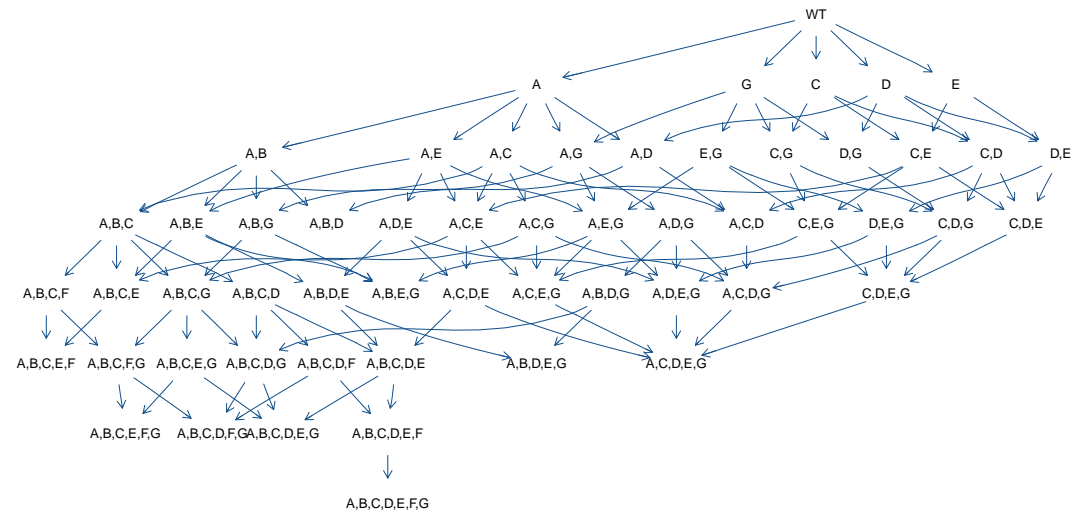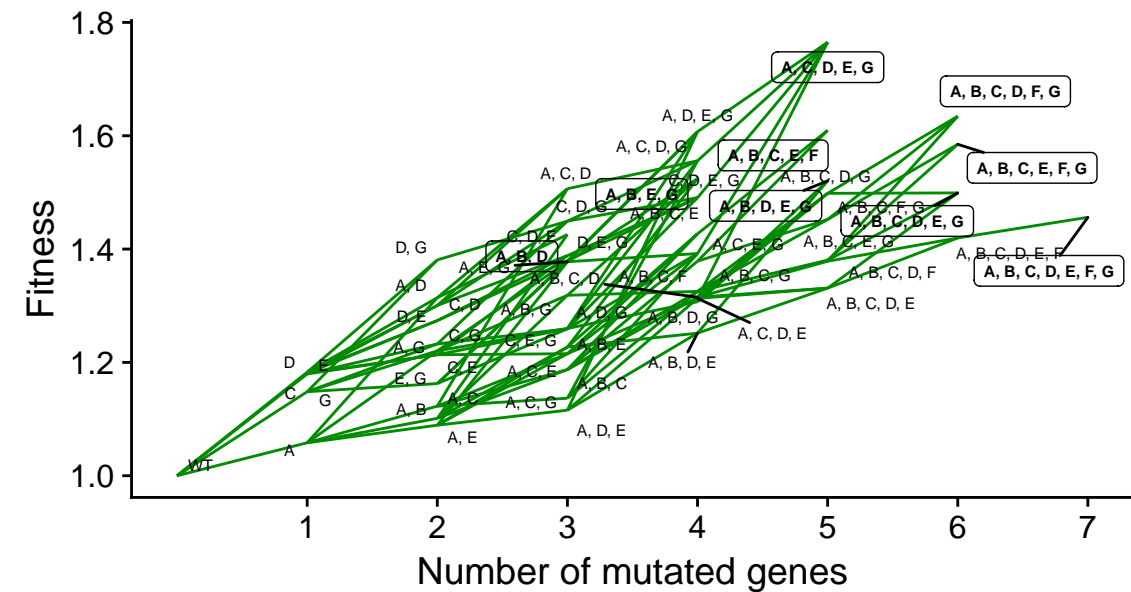

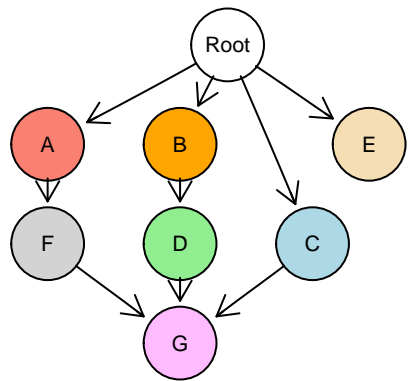

*ID* ce4Pp9mhcgxMJhs9  
*acc genotypes* 38  
*peaks no back* 3  
*removed edges* 9  
*prop rem edges* 0.103

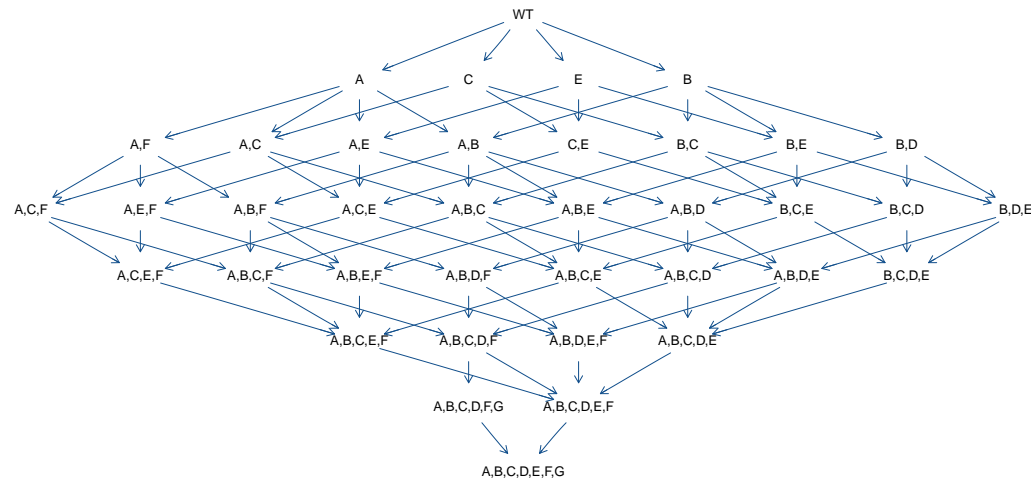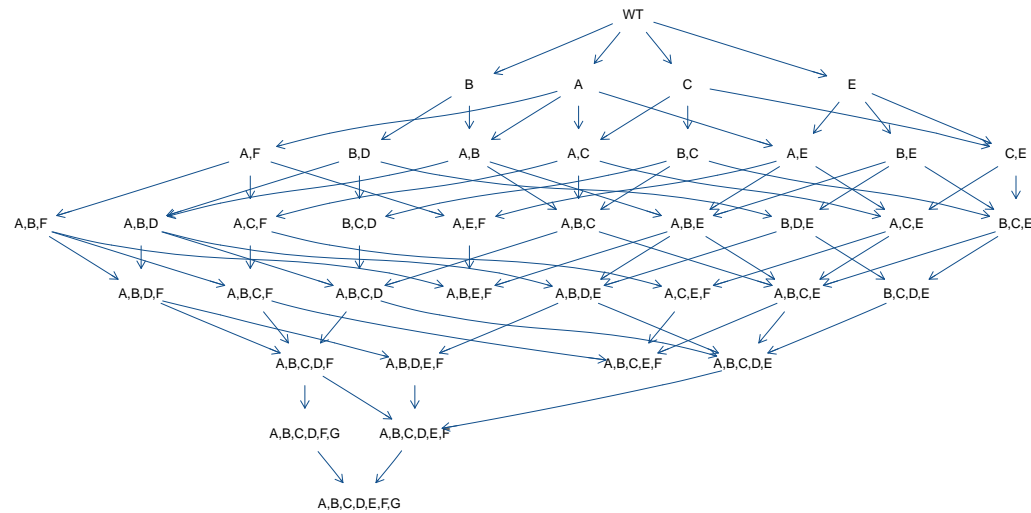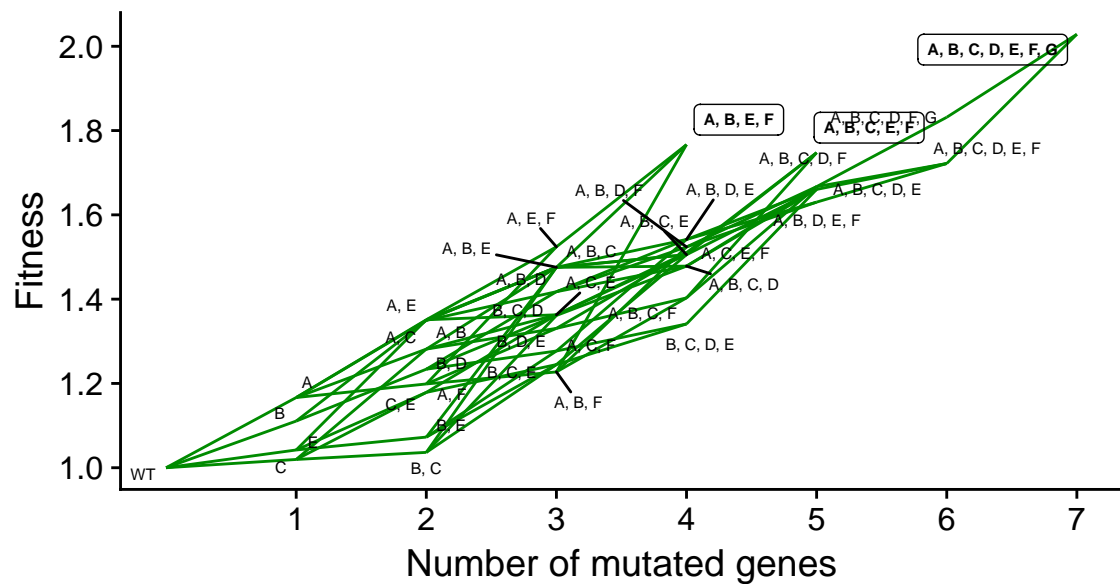

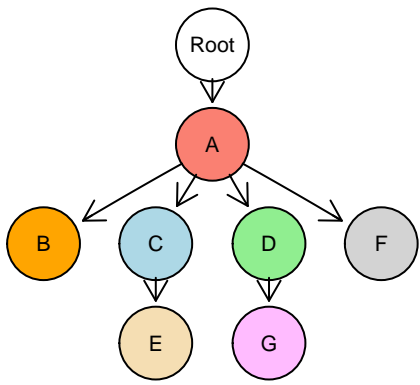

ID **cfODc4wi4uNS9zkM**  
 acc genotypes **37**  
 peaks no back **6**  
 removed edges **16**  
 prop rem edges **0.188**

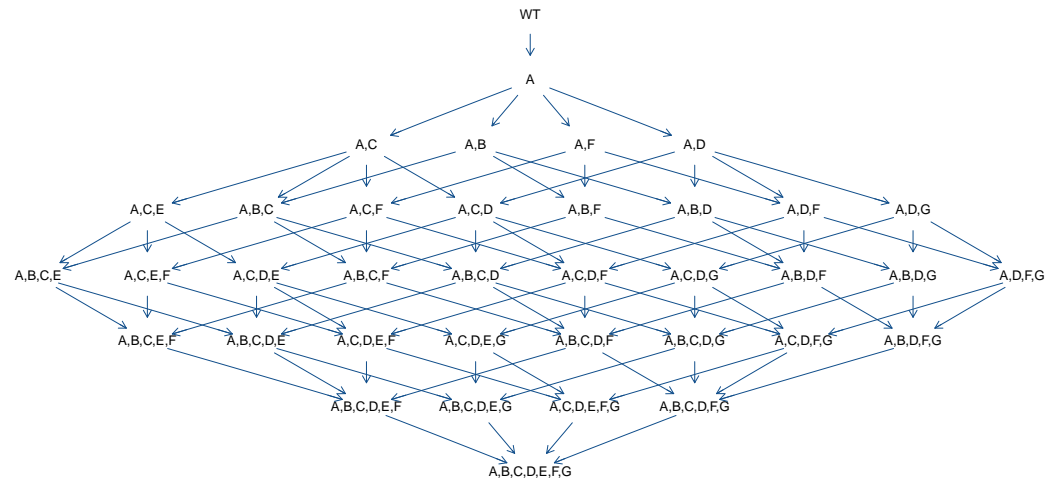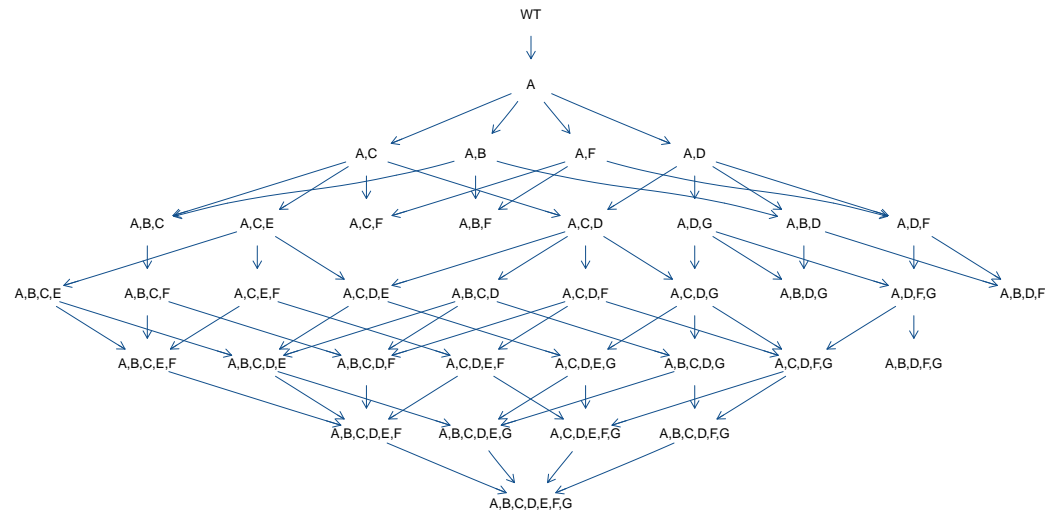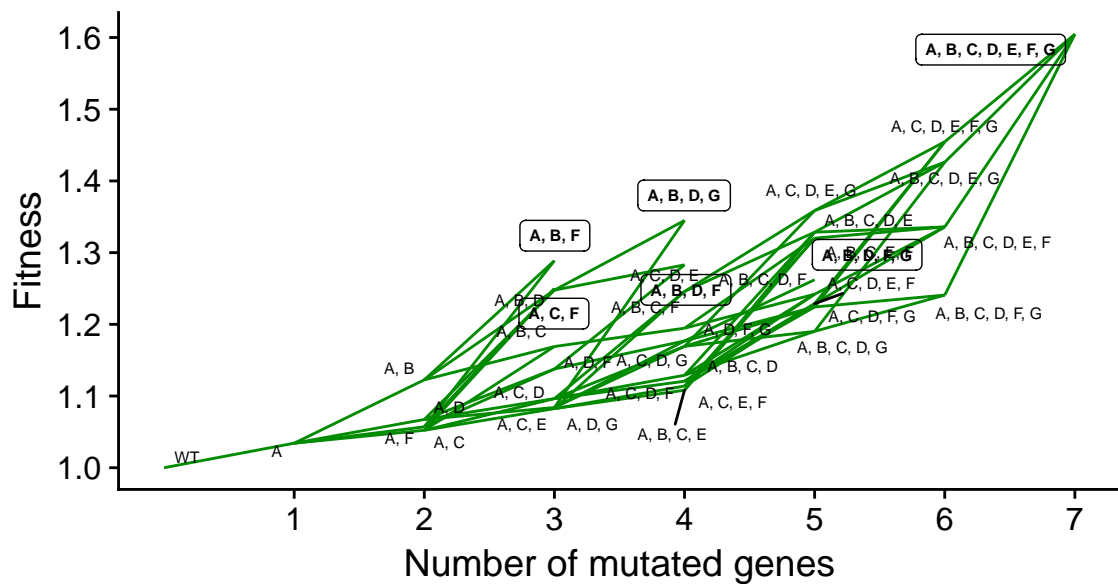

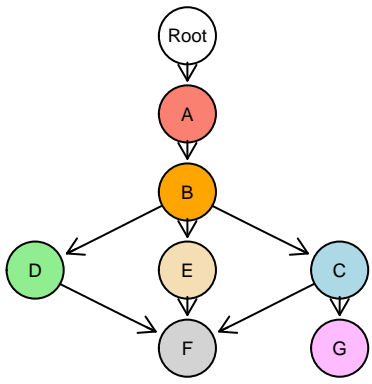

ID **chTnx8SjPrqKECWb**  
 acc genotypes **16**  
 peaks no back **3**  
 removed edges **5**  
 prop rem edges **0.2**

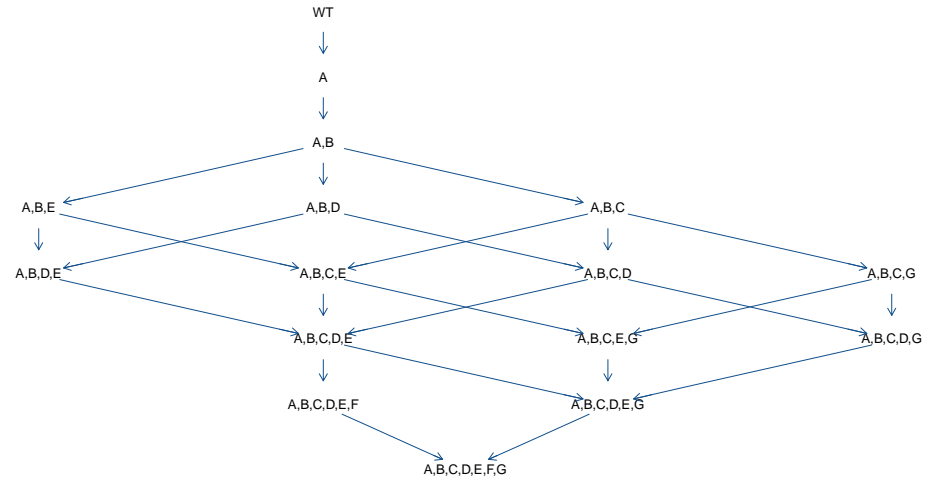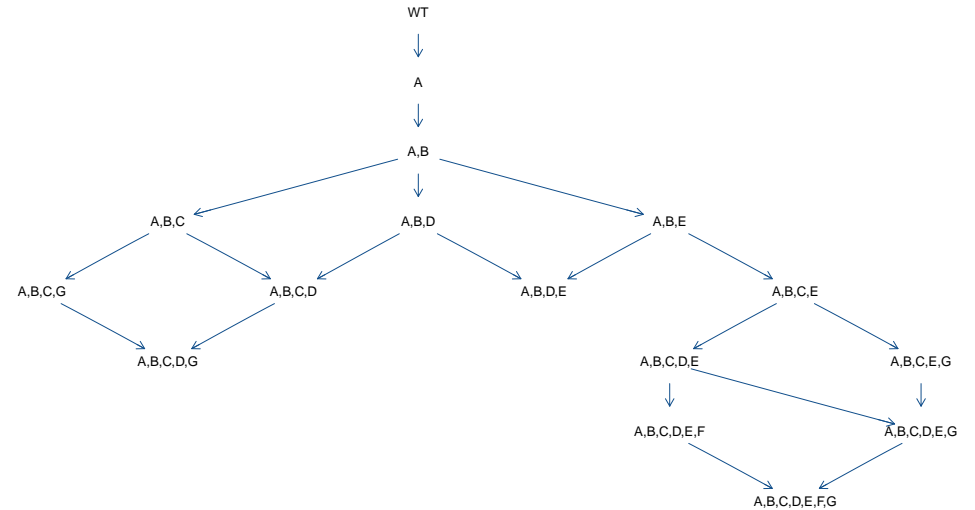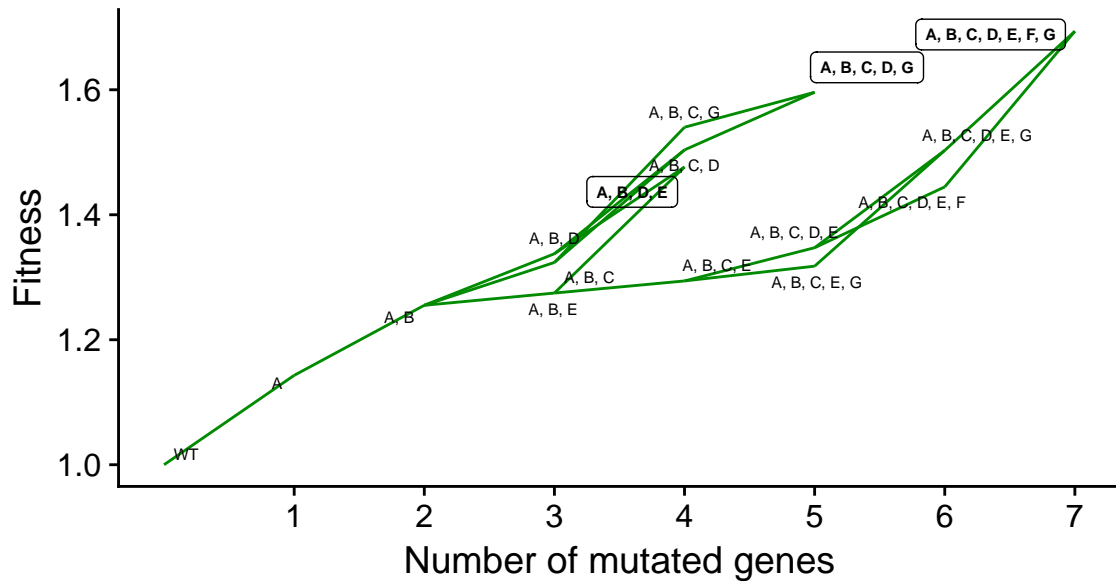

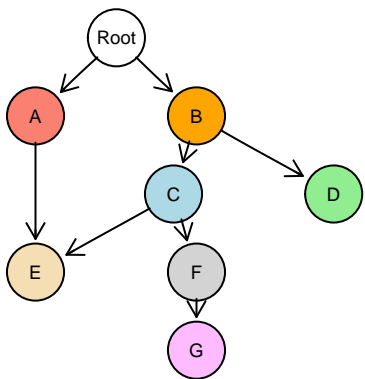

*ID* ClxqJzXIXIPDwCzC  
*acc genotypes* 24  
*peaks no back* 5  
*removed edges* 7  
*prop rem edges* 0.159

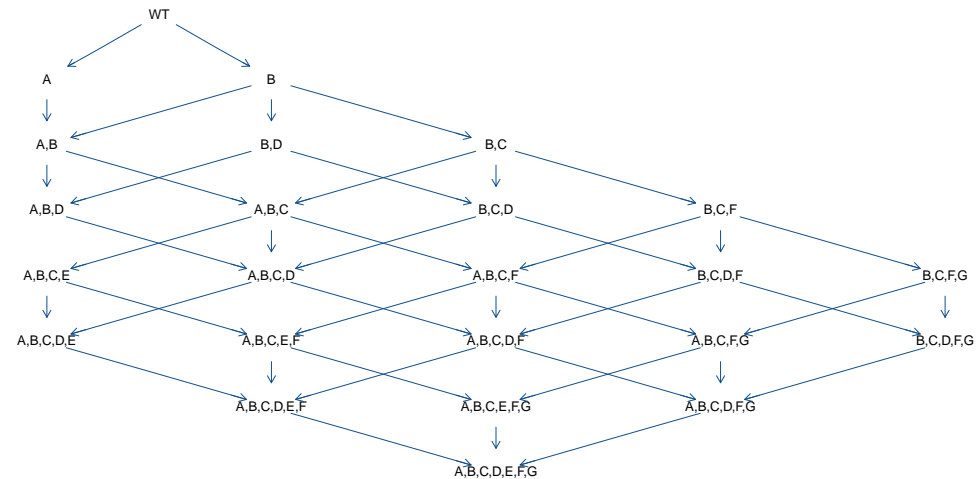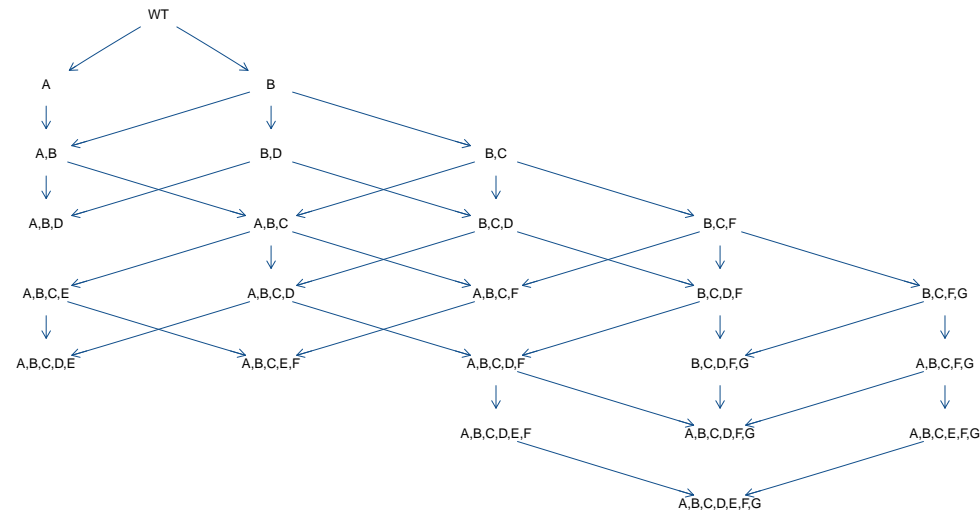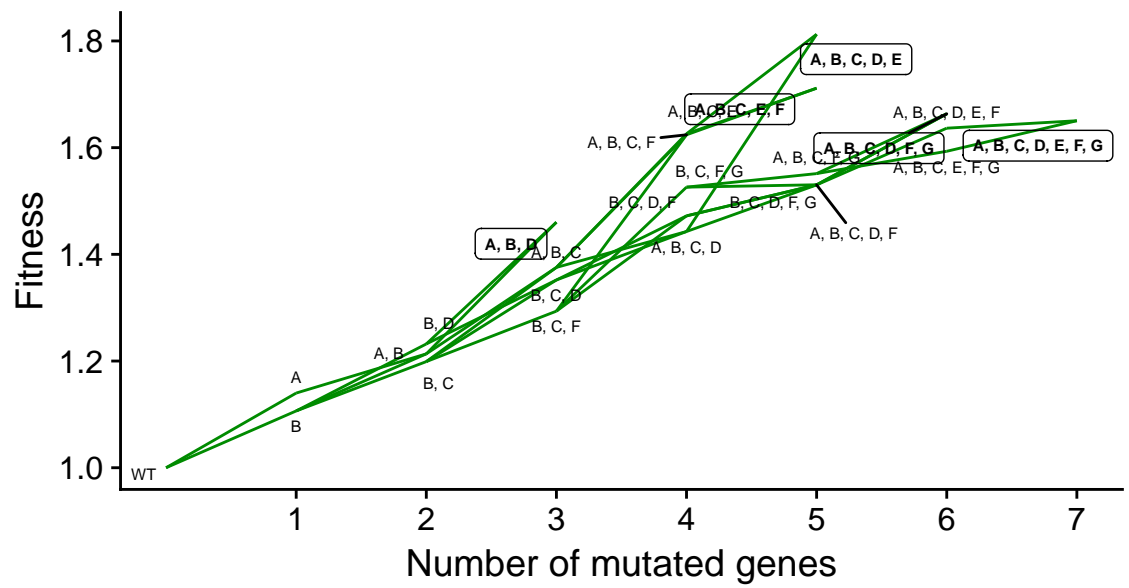

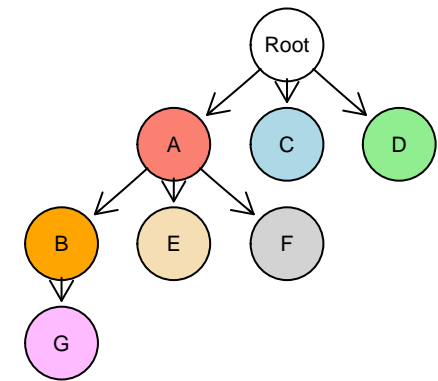

*ID* cPTyfbkkNctnZY8i  
*acc genotypes* 52  
*peaks no back* 7  
*removed edges* 30  
*prop rem edges* 0.221

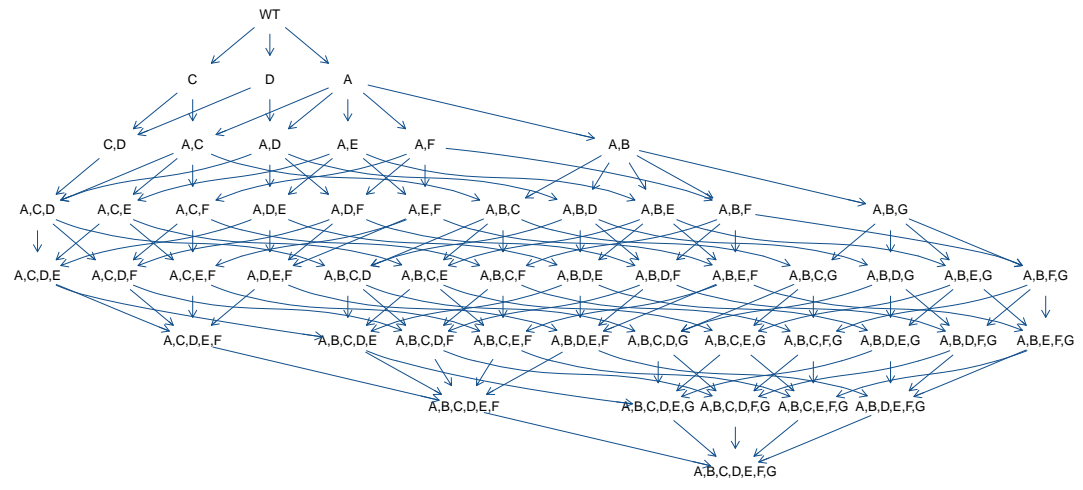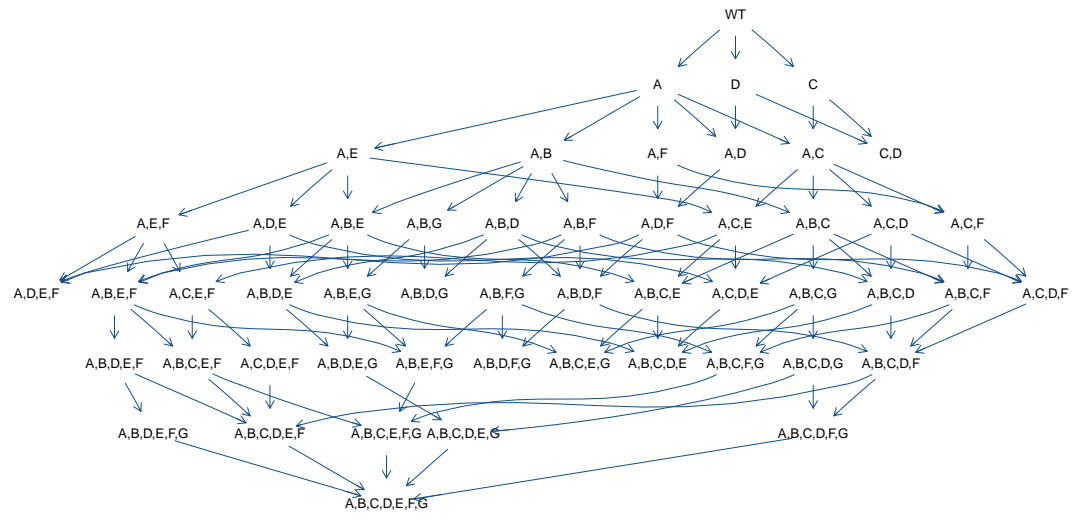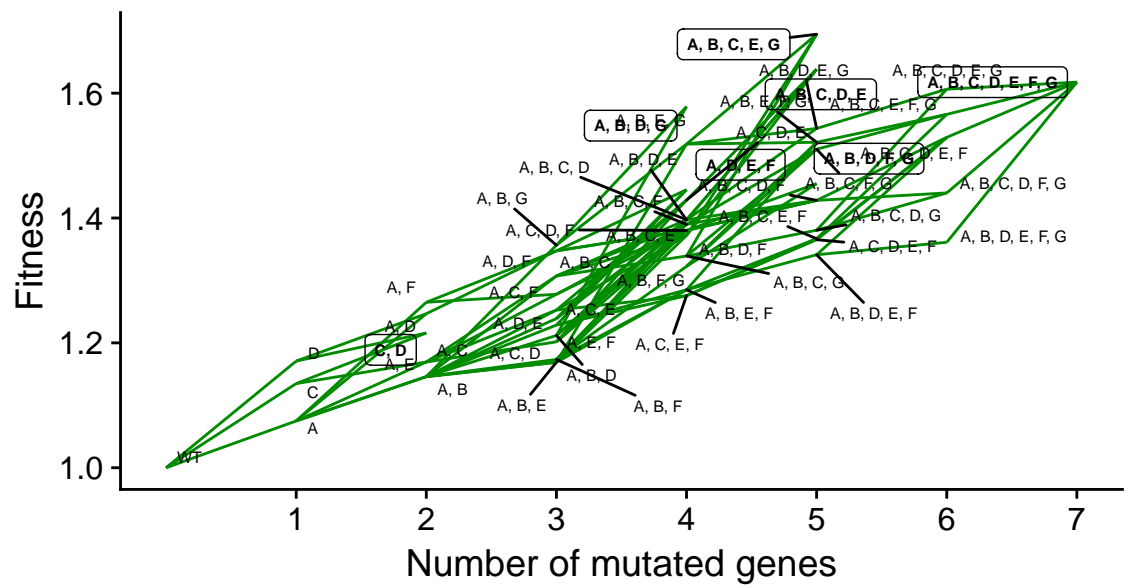

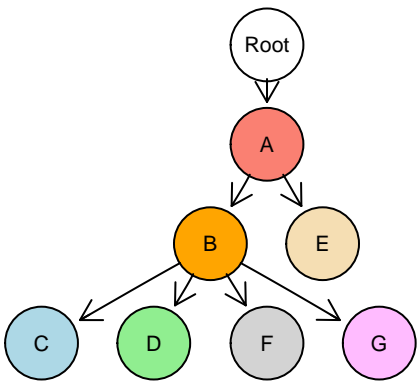

*ID* cPvIM3BD3obpDIZu  
*acc genotypes* 35  
*peaks no back* 4  
*removed edges* 6  
*prop rem edges* 0.071

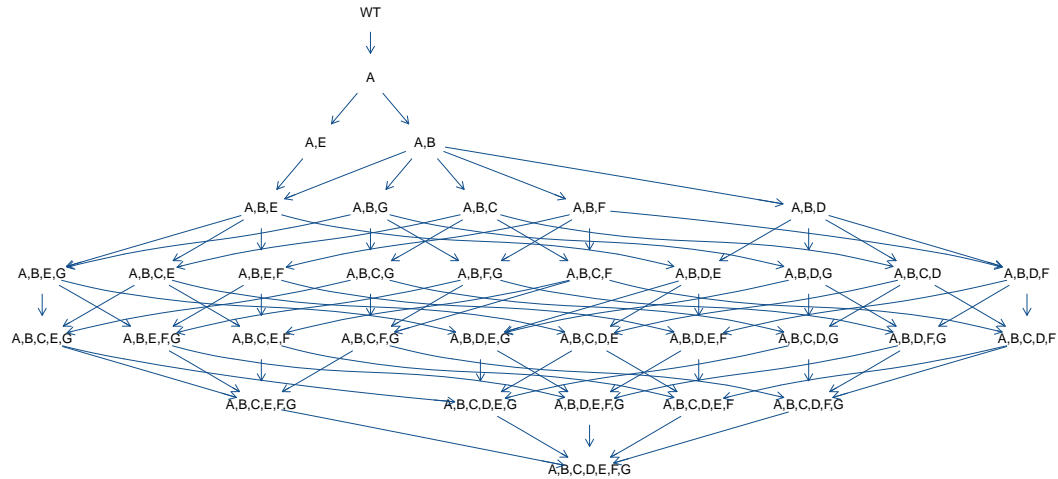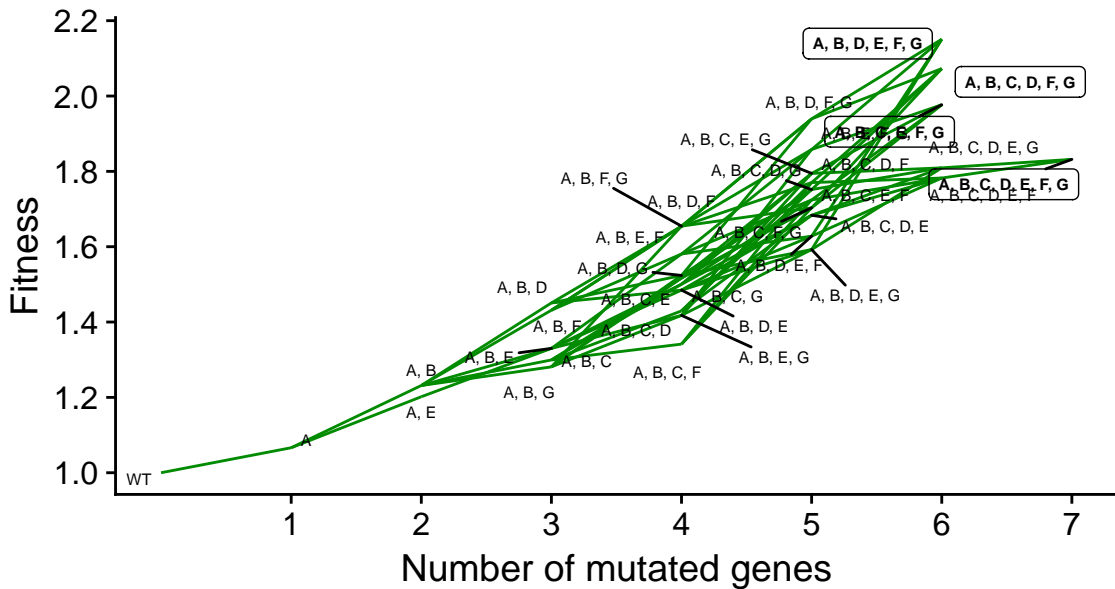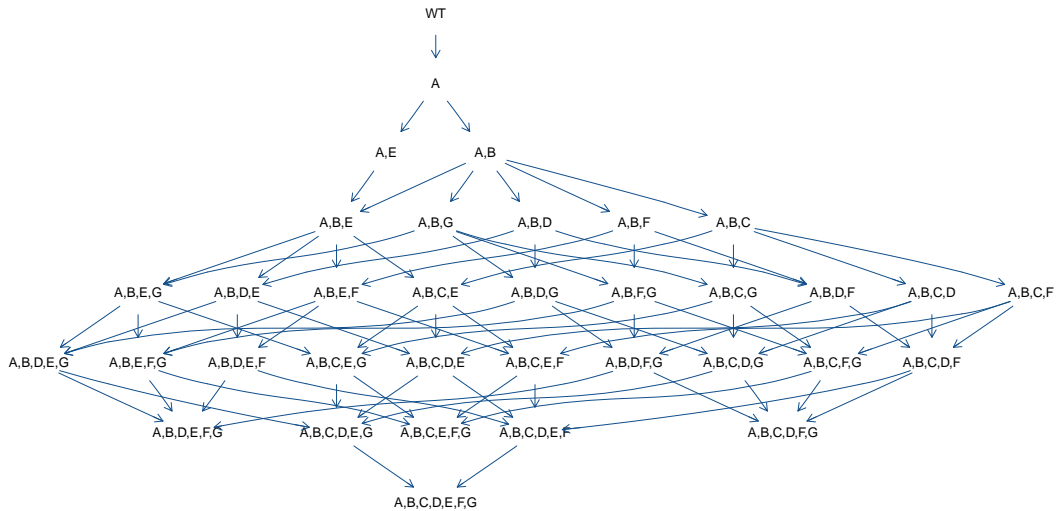

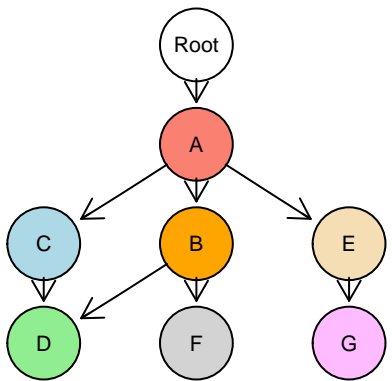

ID CQaJm9ITvQh26obo  
 acc genotypes 25  
 peaks no back 4  
 removed edges 11  
 prop rem edges 0.234

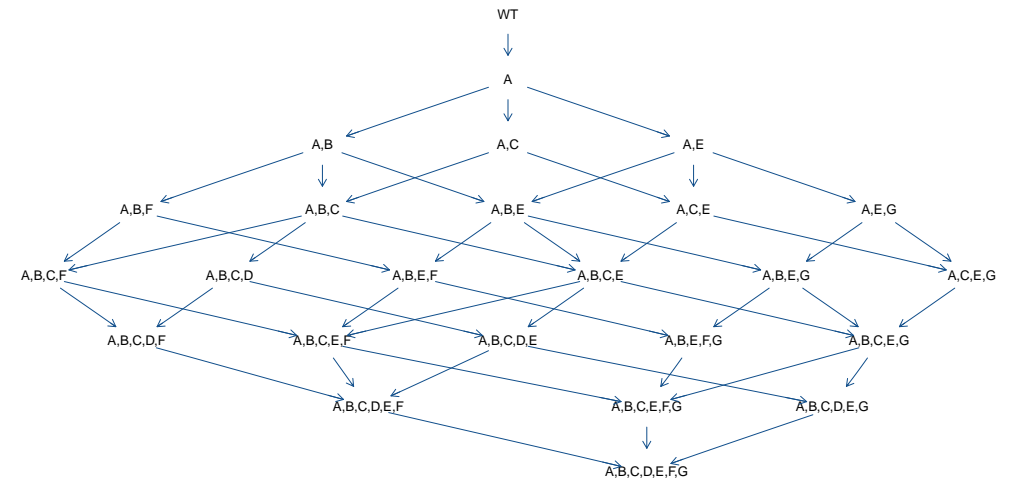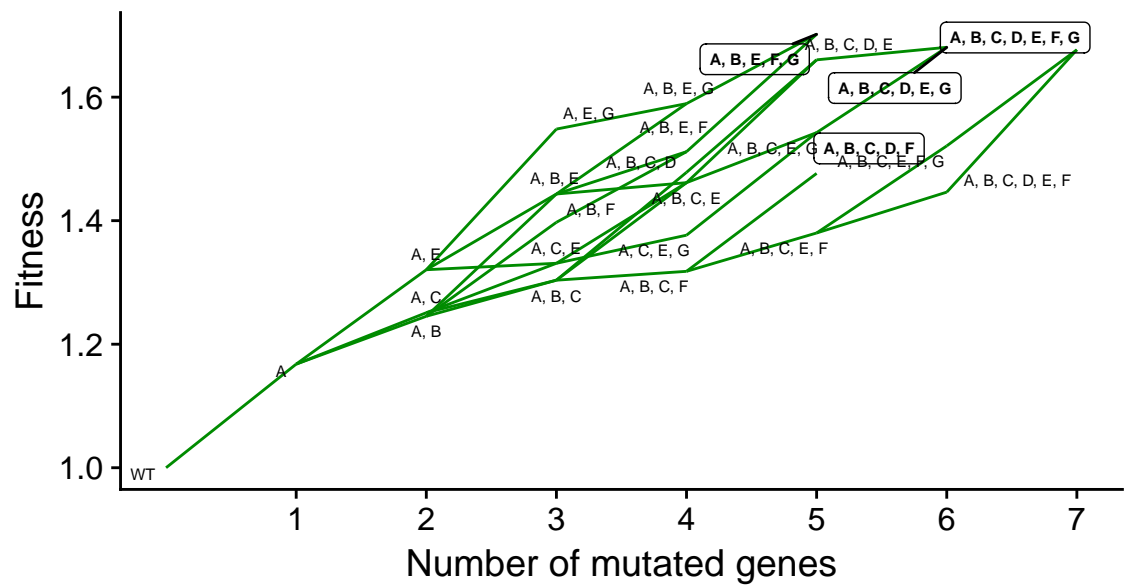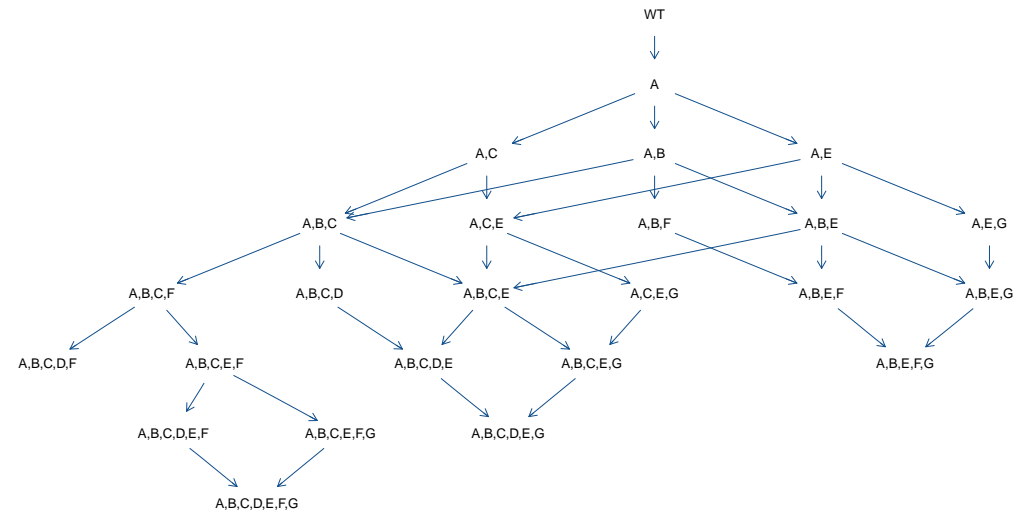



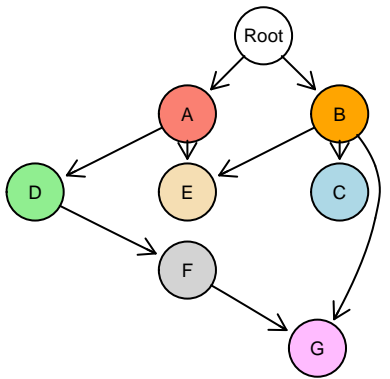

ID **cQdnO9XMvDNKOW39**  
 acc genotypes **22**  
 peaks no back **4**  
 removed edges **5**  
 prop rem edges **0.132**

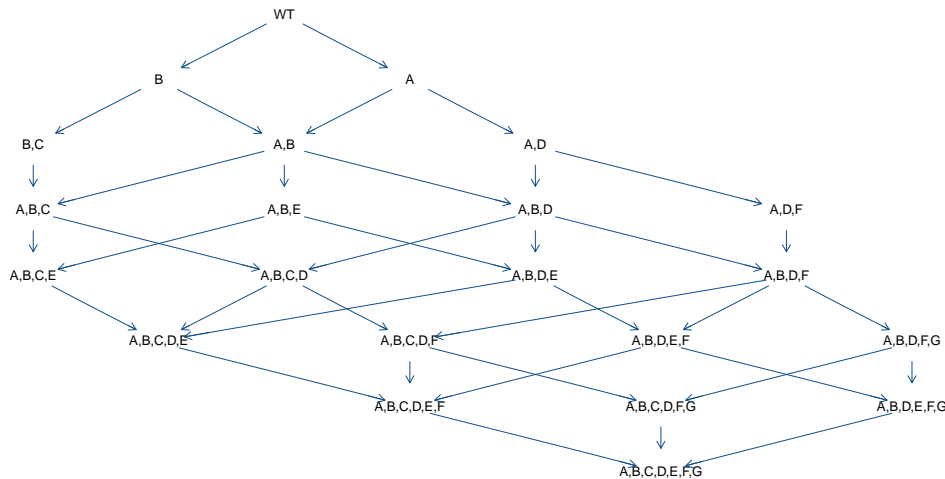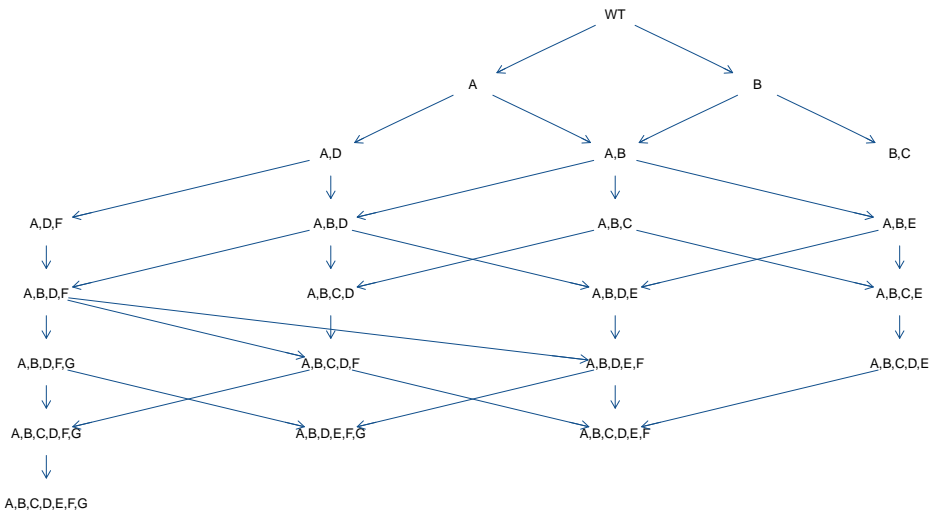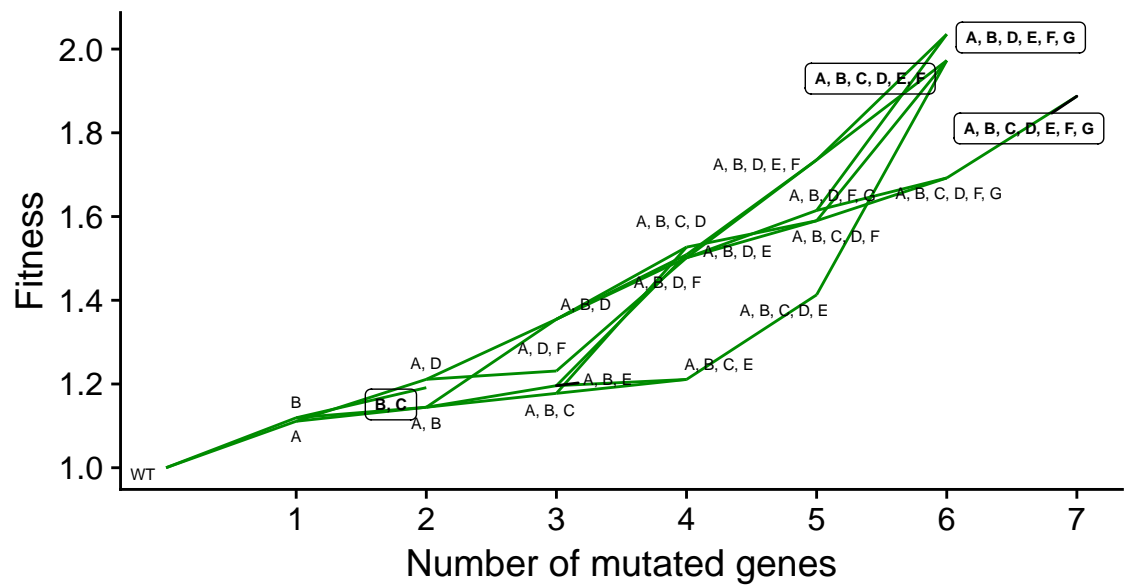

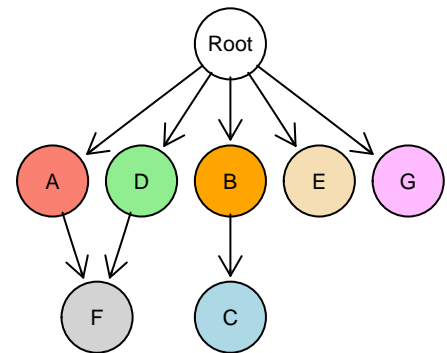

*ID* cwFWkTsrbGFO2dfv  
*acc genotypes* 60  
*peaks no back* 7  
*removed edges* 29  
*prop rem edges* 0.181

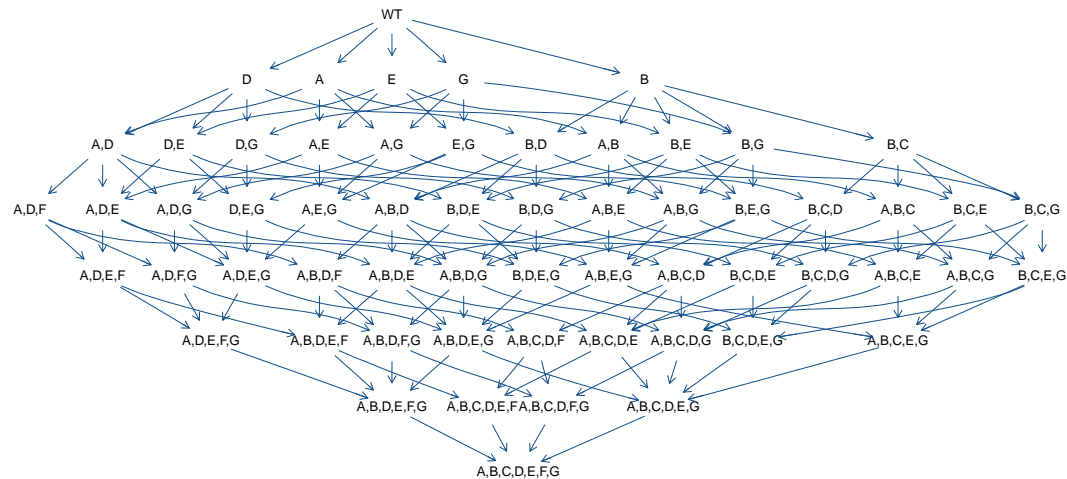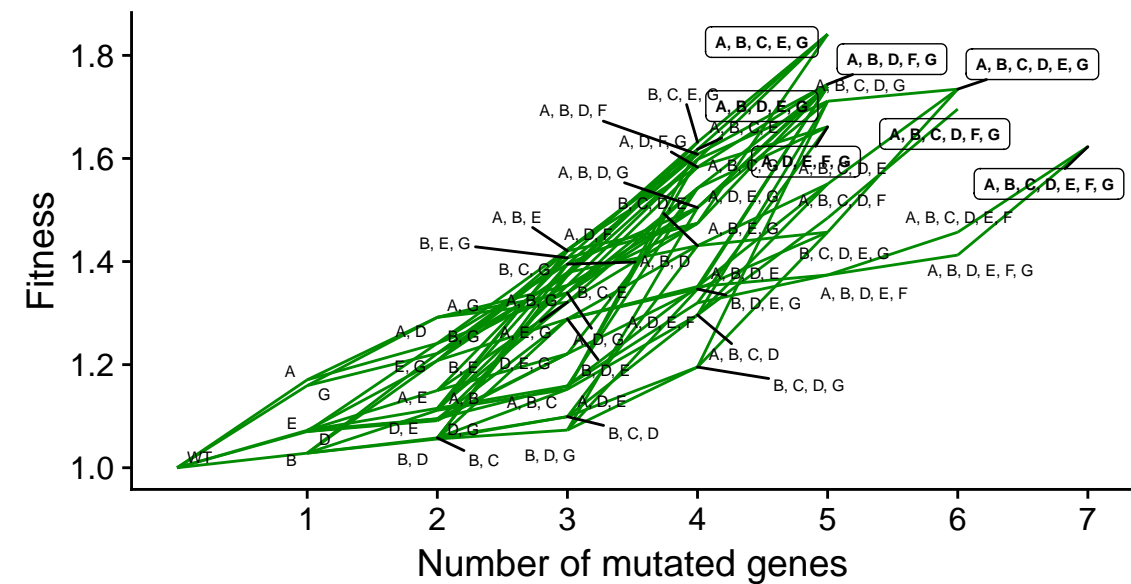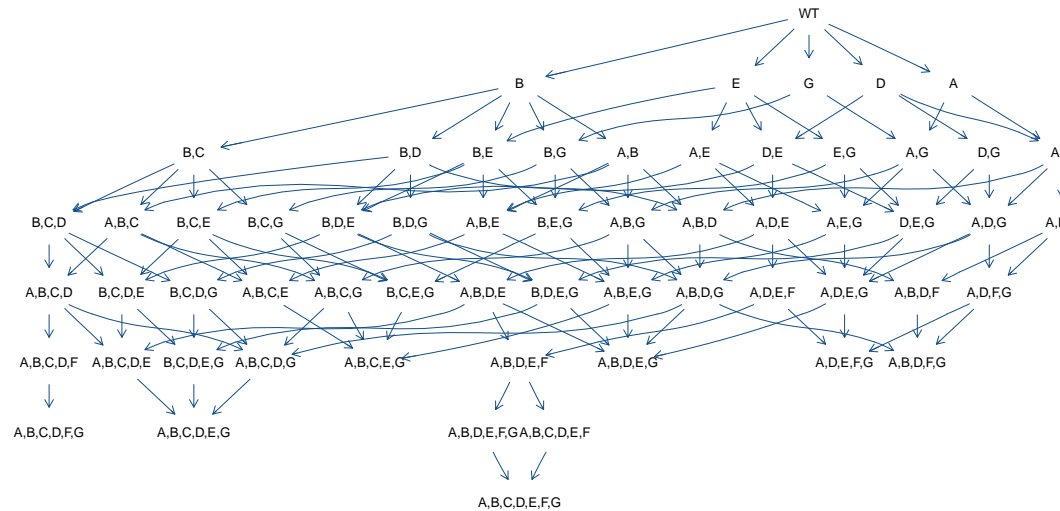

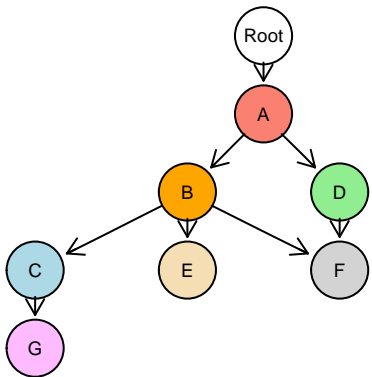

*ID* D1wA9X4HhUWYpfHR  
*acc genotypes* 21  
*peaks no back* 5  
*removed edges* 8  
*prop rem edges* 0.216

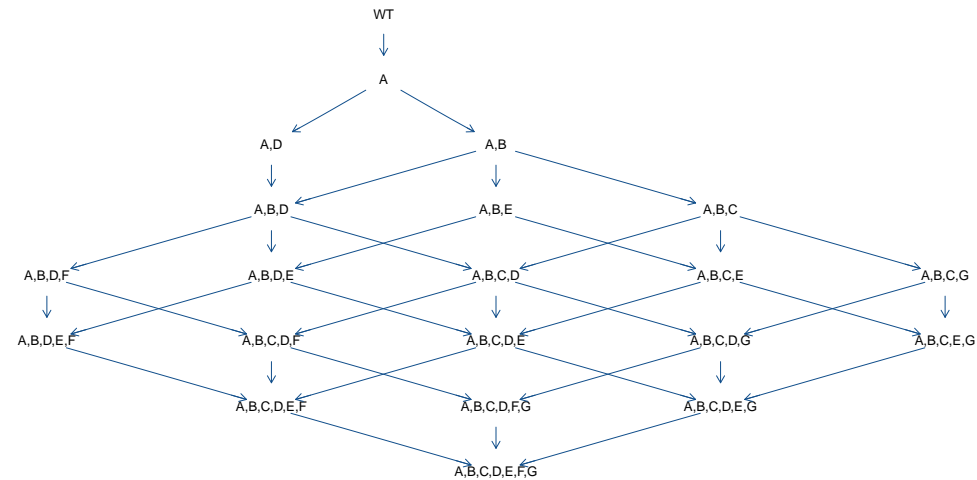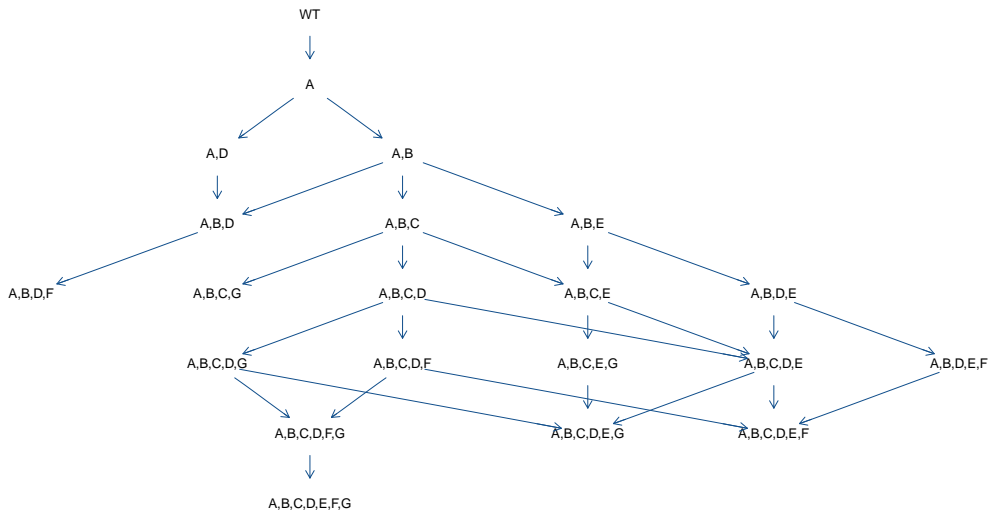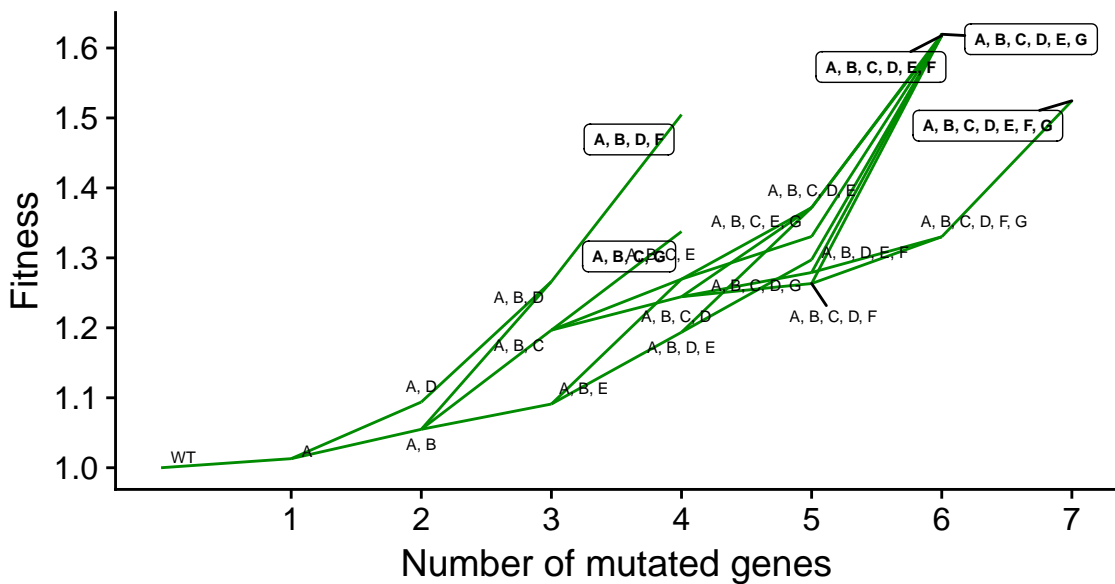

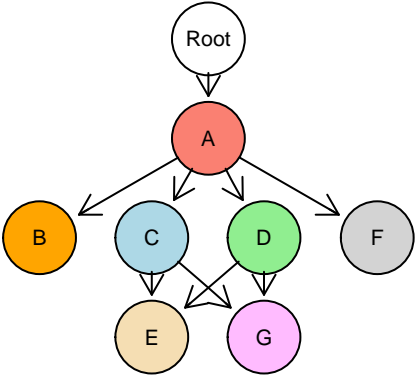

*ID* DBuyPIOfmeKuiDc  
*acc genotypes* 29  
*peaks no back* 5  
*removed edges* 9  
*prop rem edges* 0.148

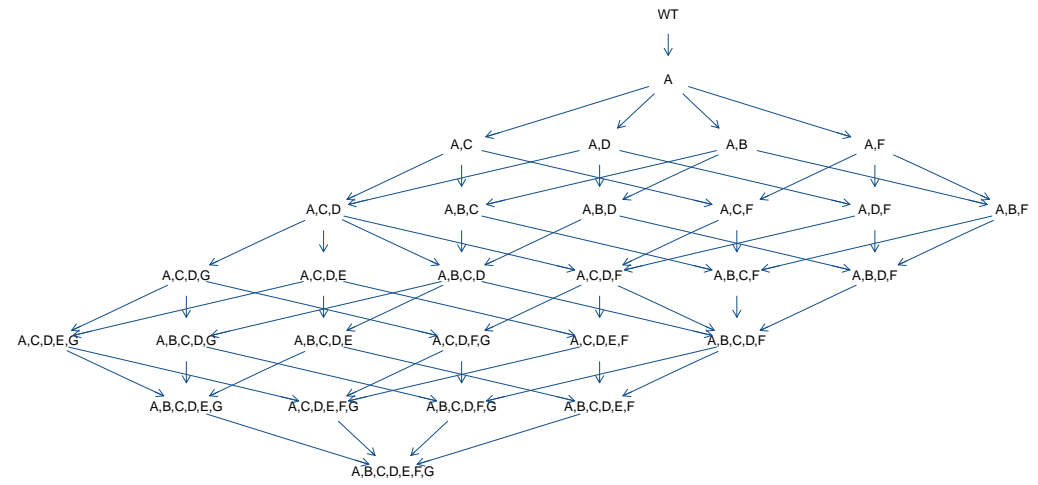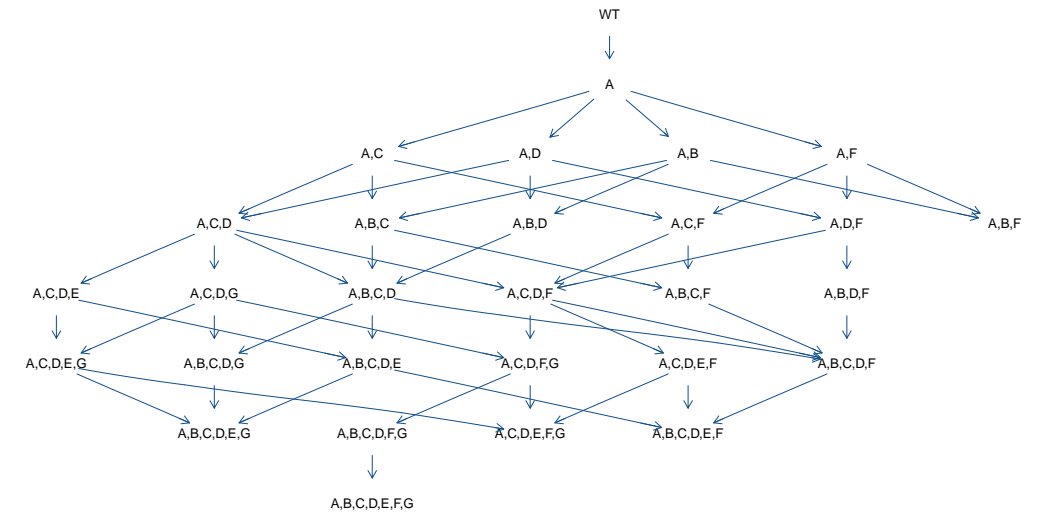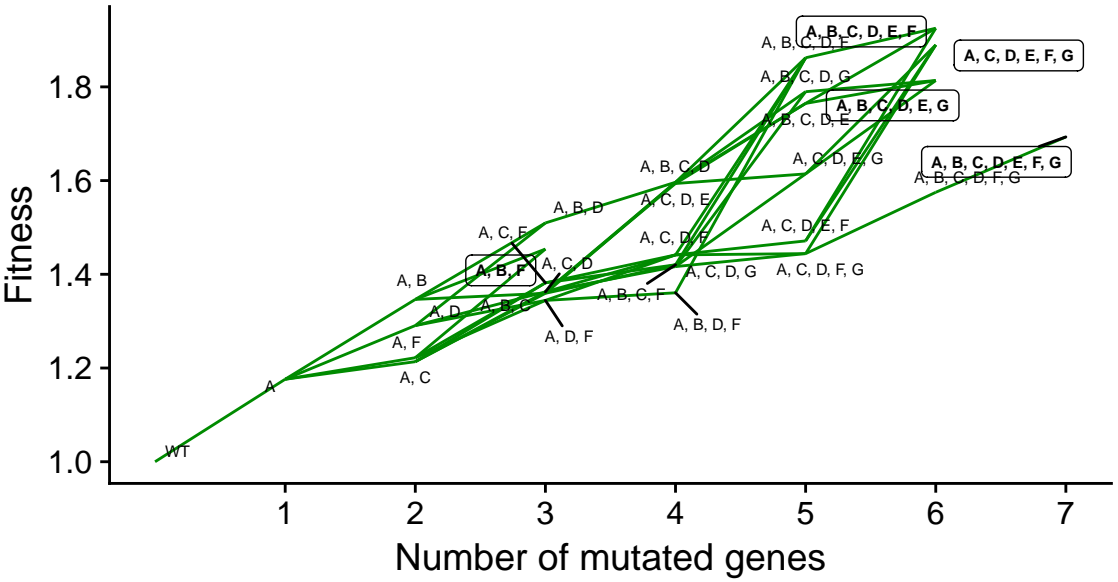

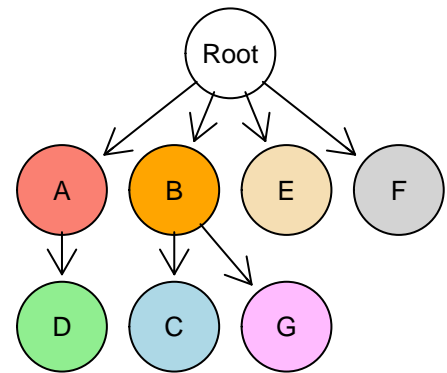

ID DDAFd9YIDa3wcyX  
 acc genotypes 60  
 peaks no back 8  
 removed edges 32  
 prop rem edges 0.2

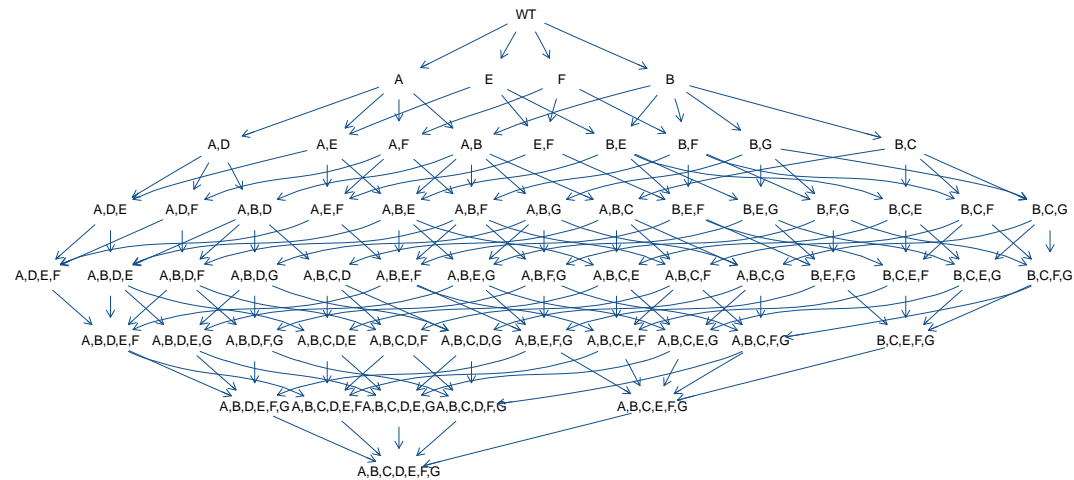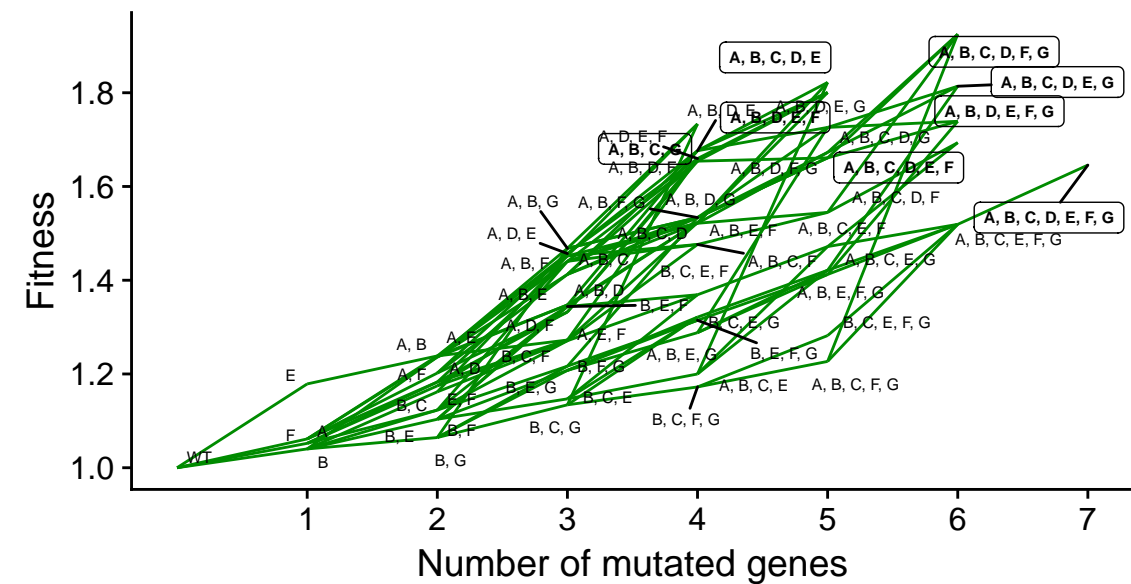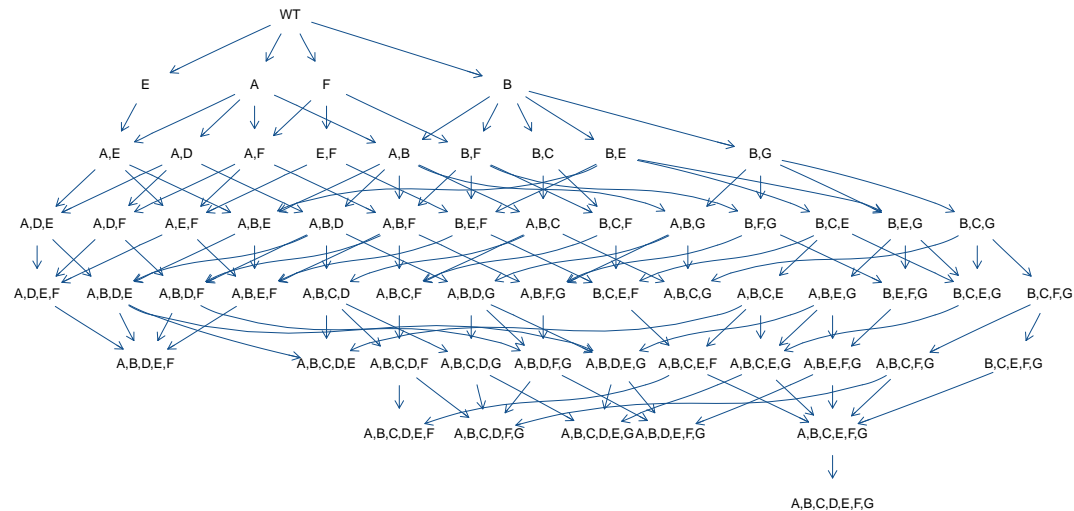

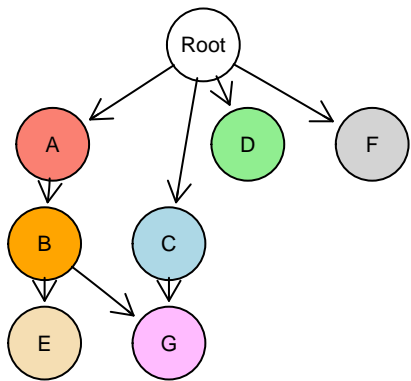

ID **DE10Mak4NoN6QJYUY**  
 acc genotypes **40**  
 peaks no back **4**  
 removed edges **13**  
 prop rem edges **0.141**

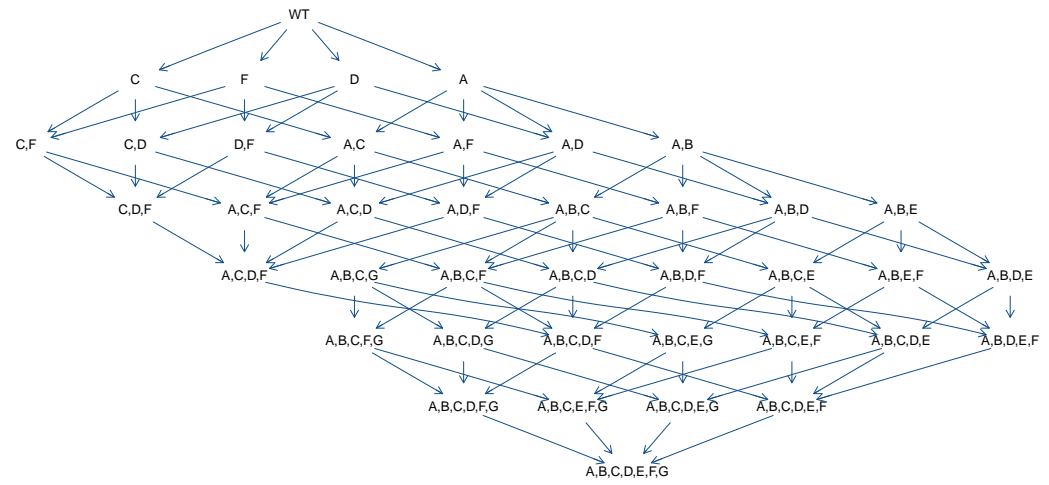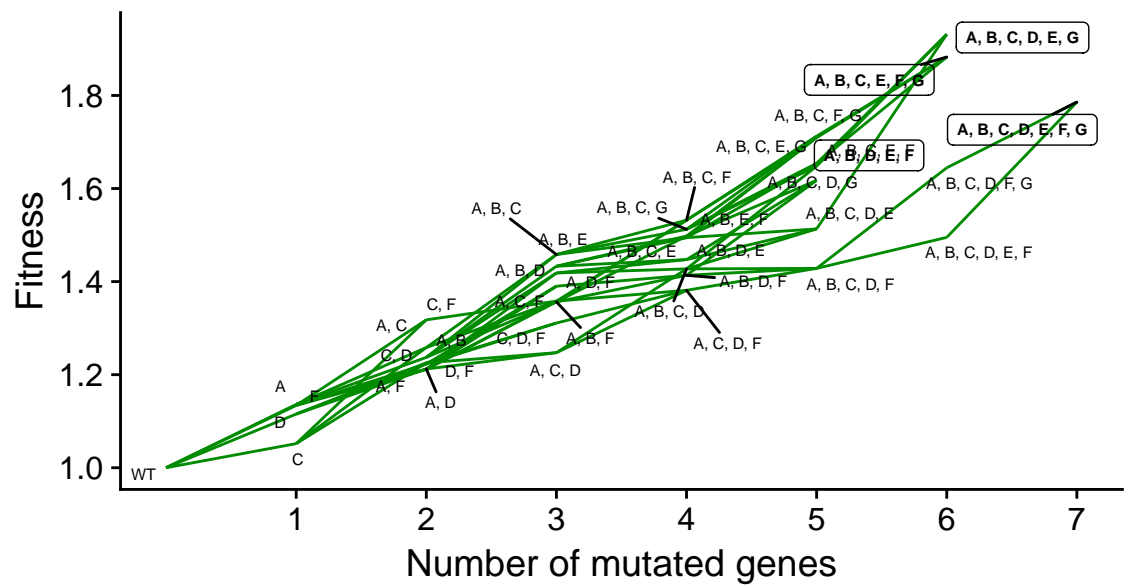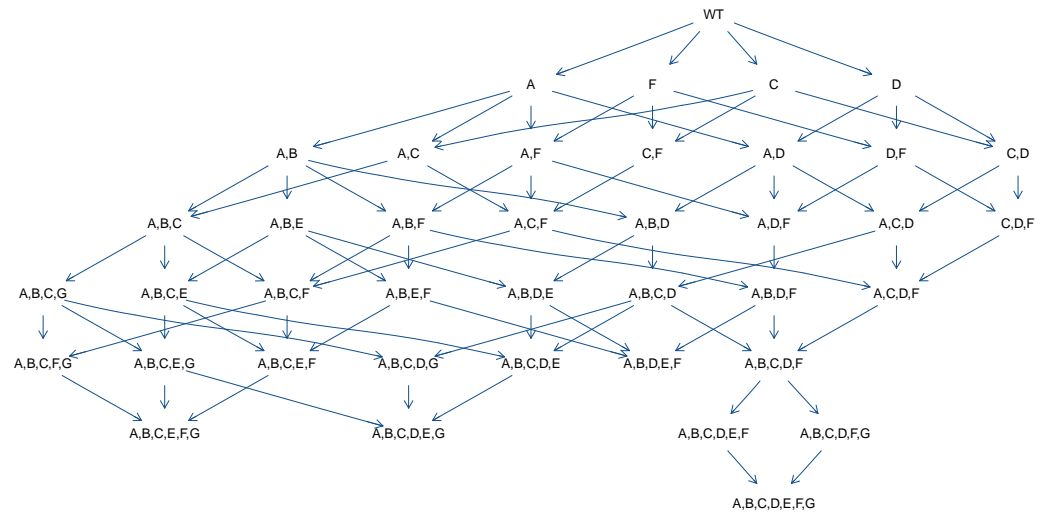

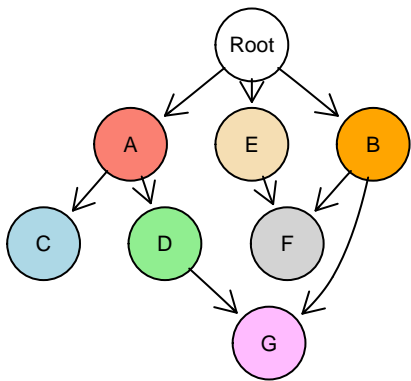

ID **dJOynYb7GGPbx910F**  
 acc genotypes **31**  
 peaks no back **5**  
 removed edges **12**  
 prop rem edges **0.19**

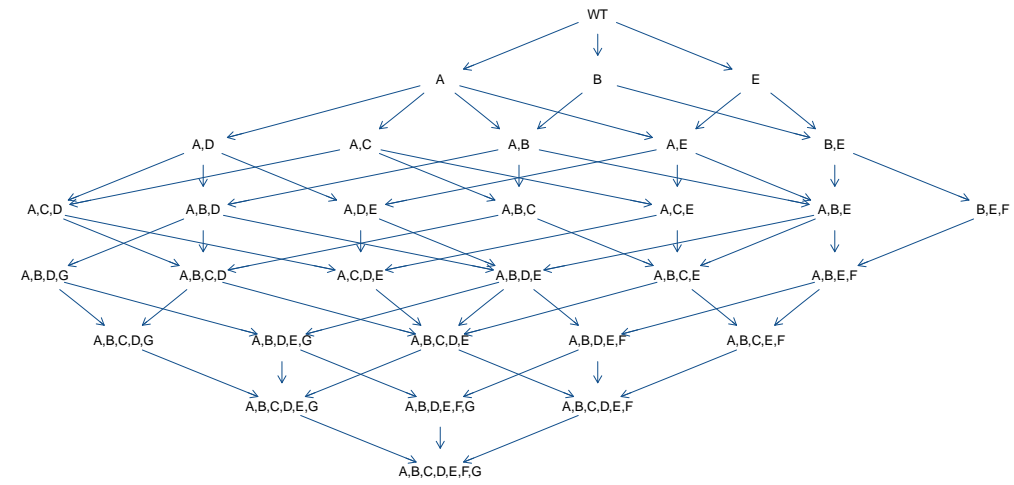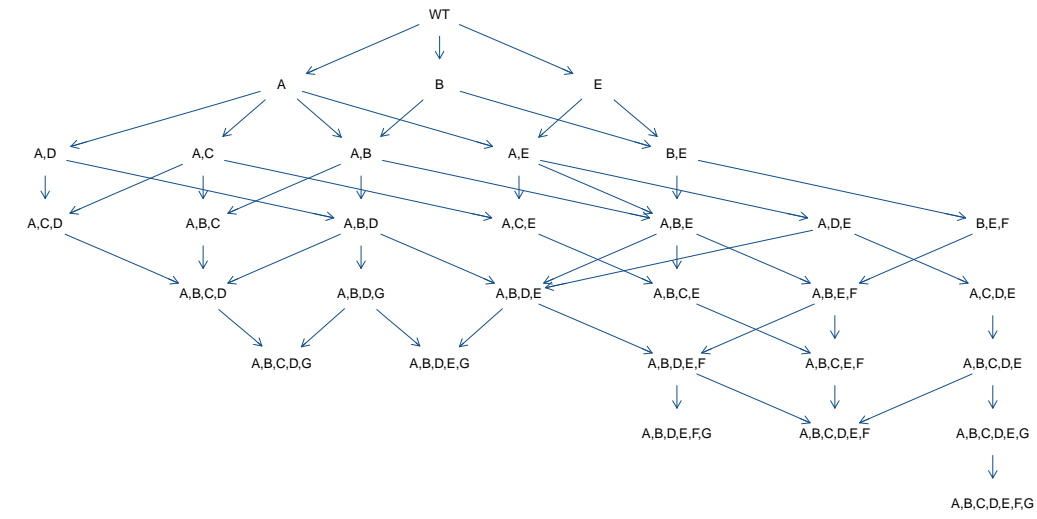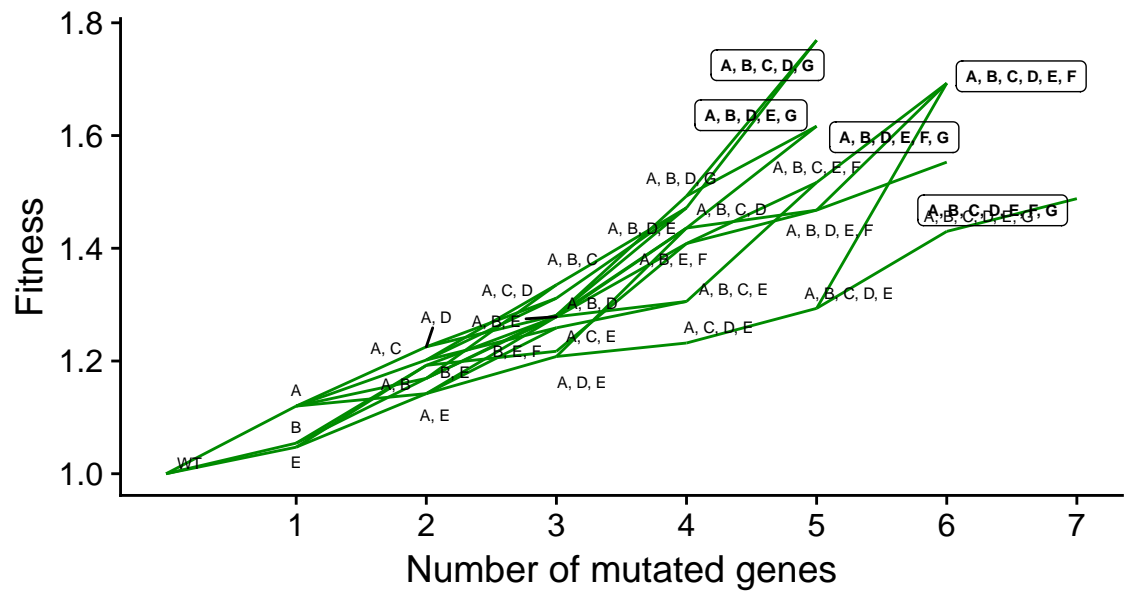

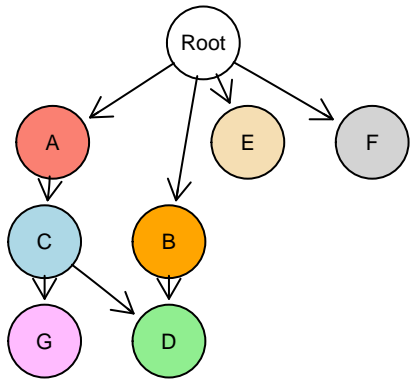

ID **DM6wSFi5wdVWUqiH**  
 acc genotypes **40**  
 peaks no back **6**  
 removed edges **12**  
 prop rem edges **0.13**

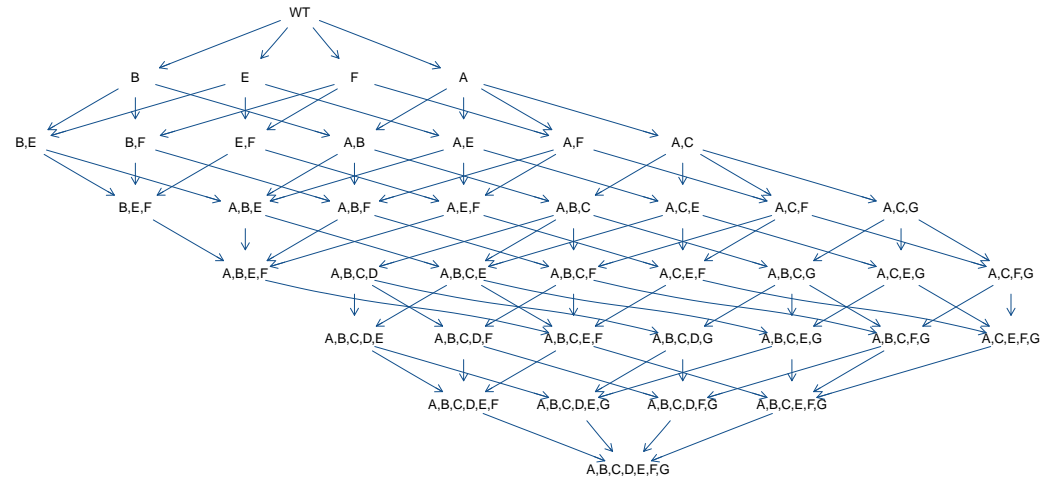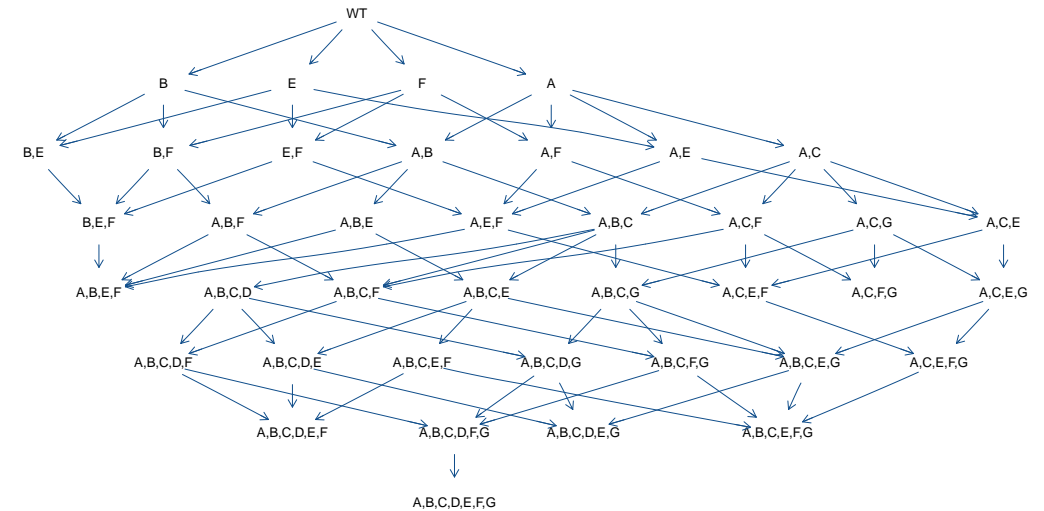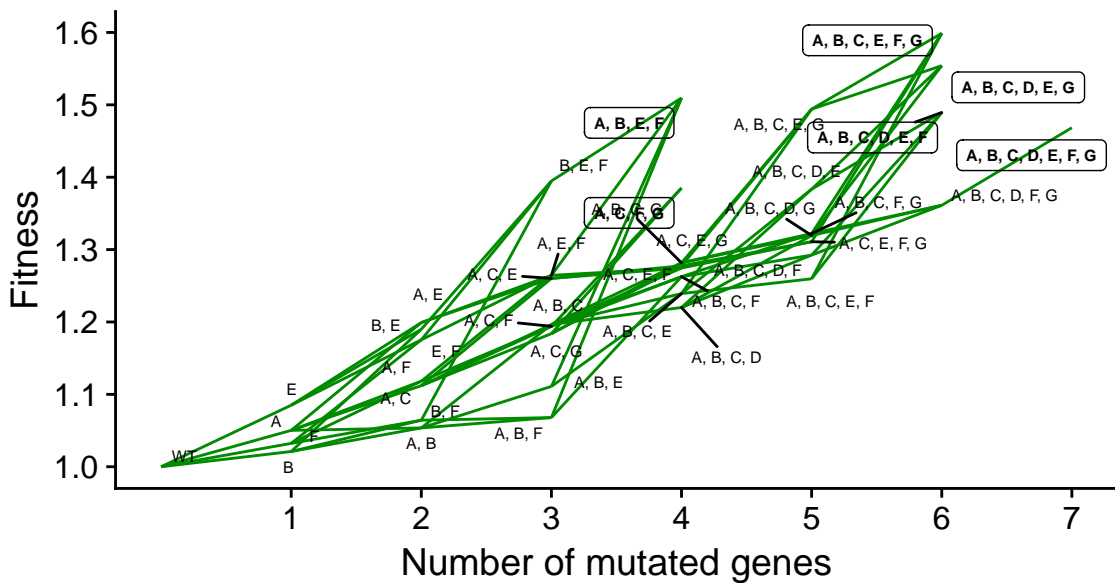



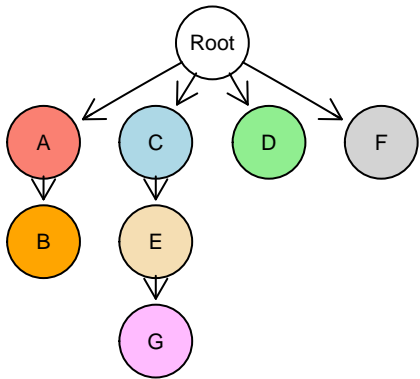

ID [dO8v6amgefufggoE](#)  
 acc genotypes 48  
 peaks no back 7  
 removed edges 24  
 prop rem edges 0.207

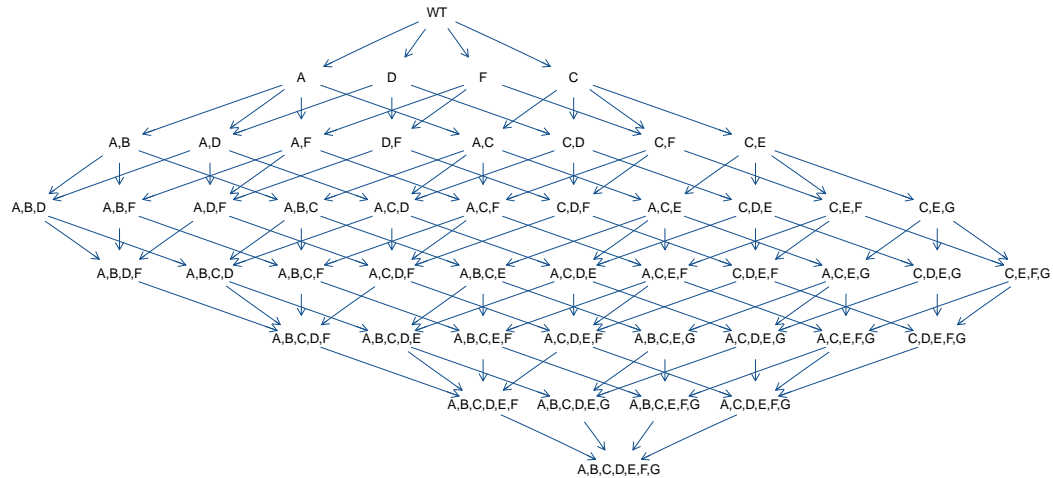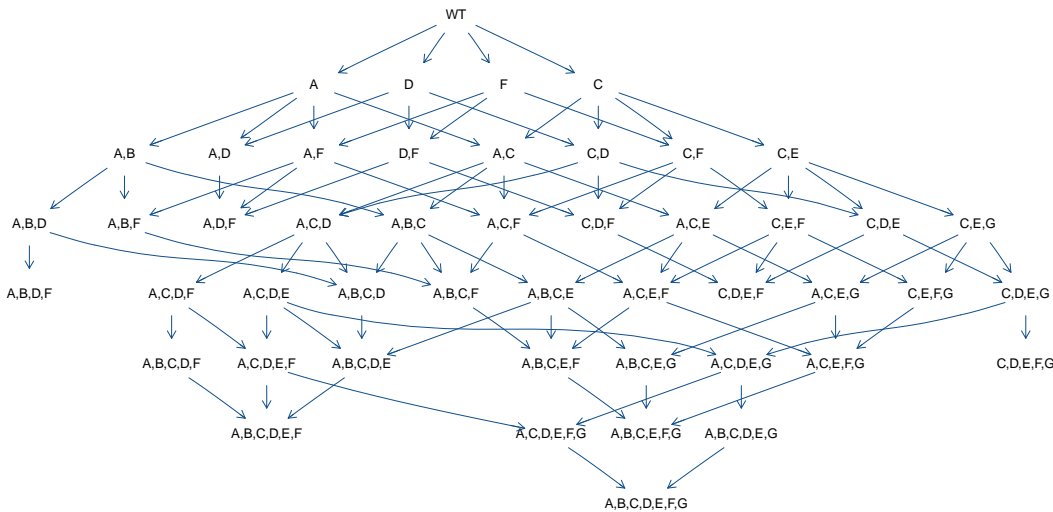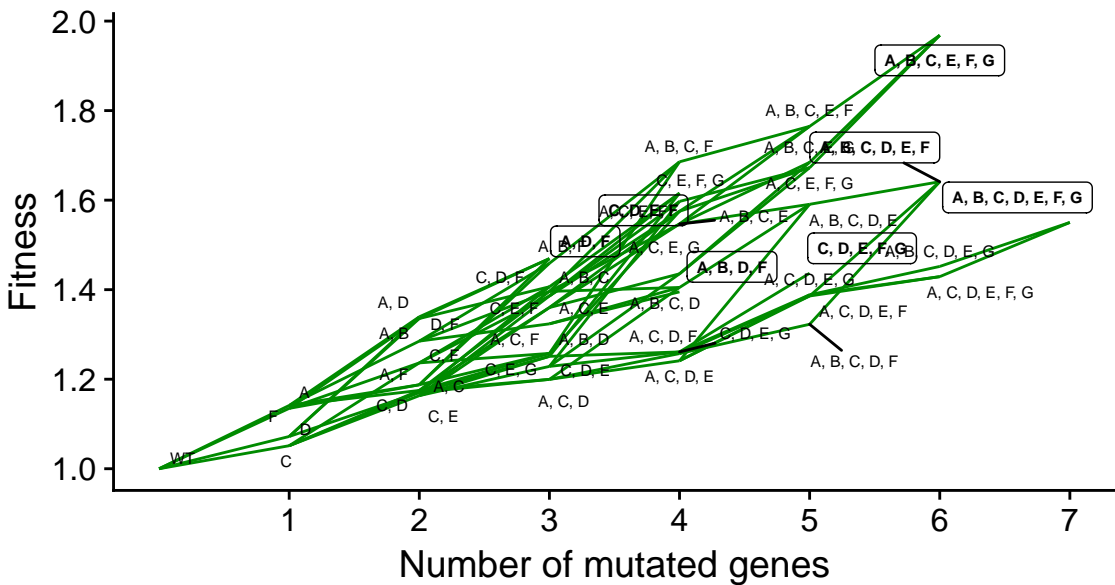

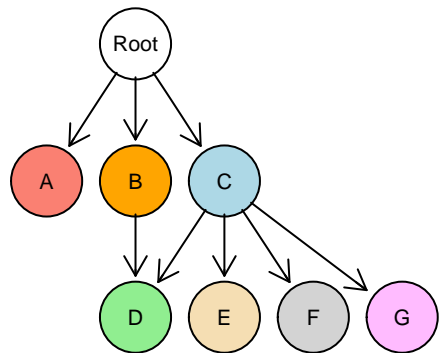

ID dPDOh3Us3MOoJnT  
 acc genotypes 52  
 peaks no back 9  
 removed edges 26  
 prop rem edges 0.191

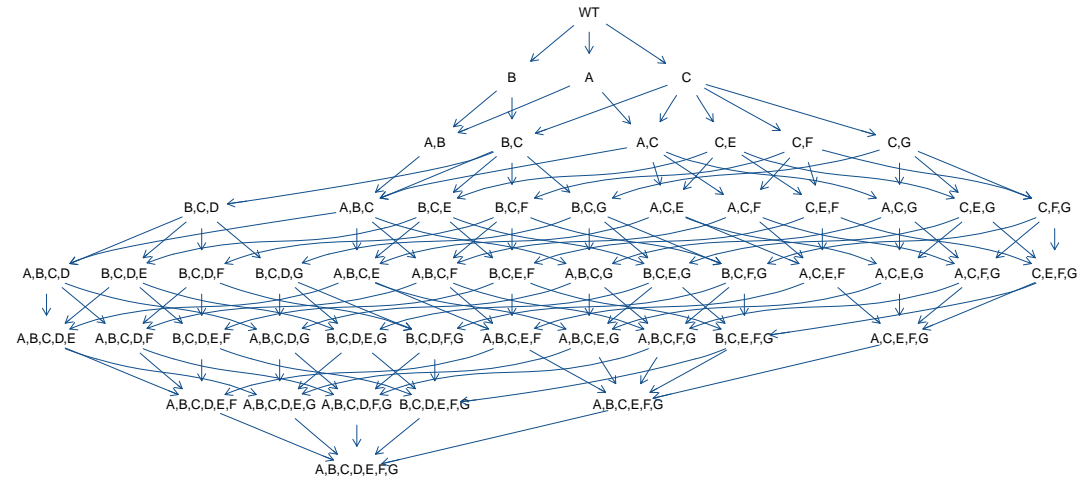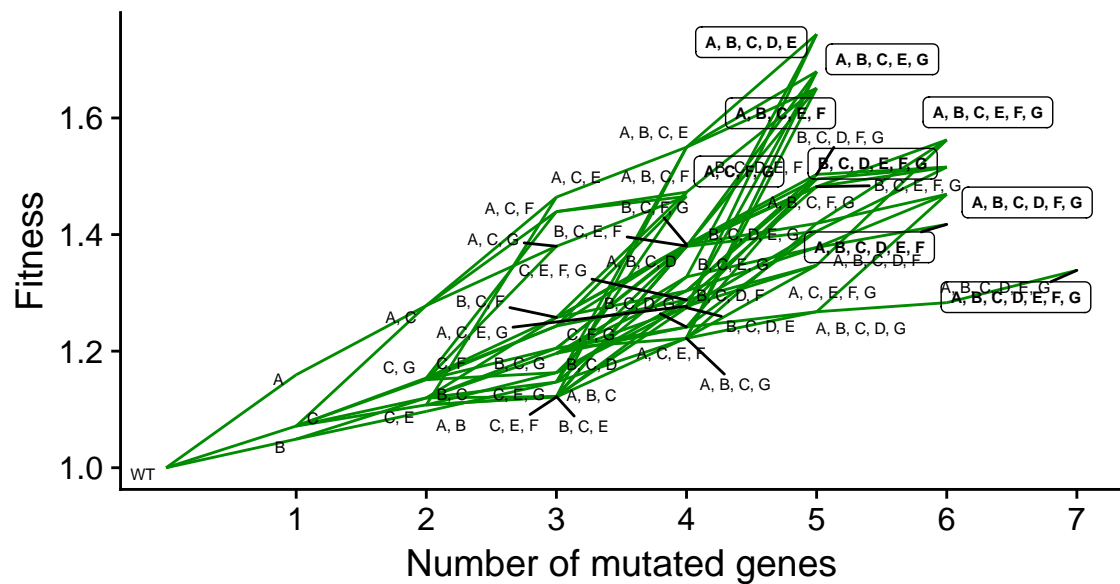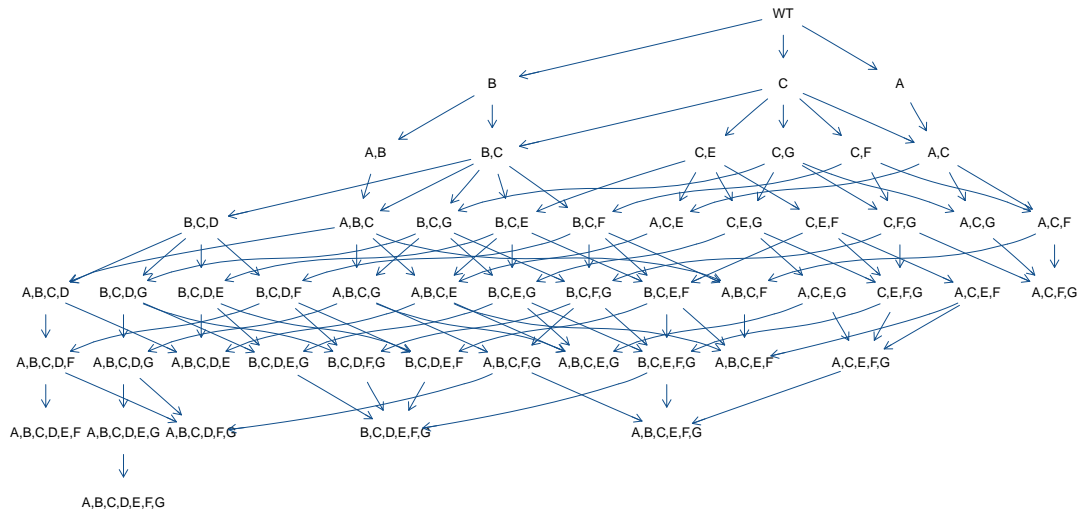

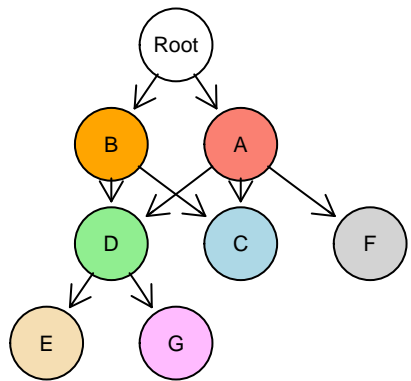

ID **E4Ngwmi2x89ilda9**  
 acc genotypes **24**  
 peaks no back 4  
 removed edges 4  
 prop rem edges 0.087

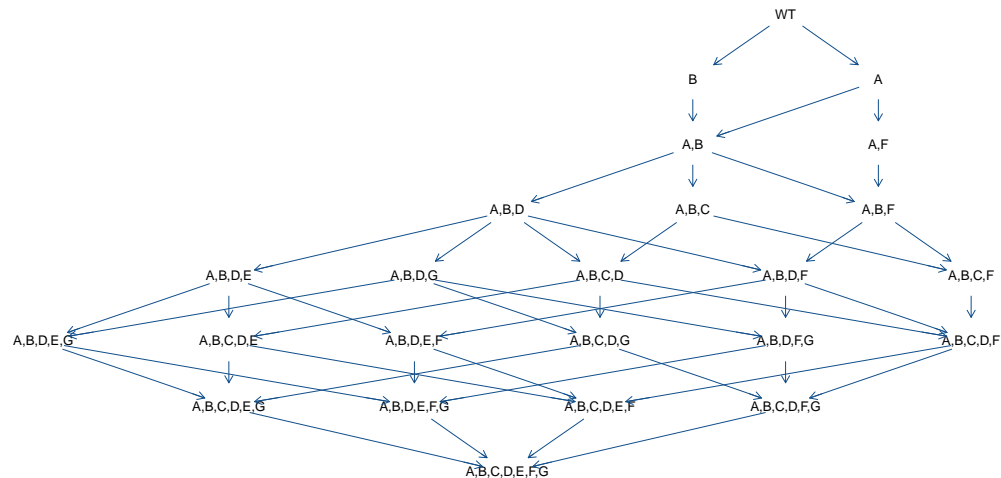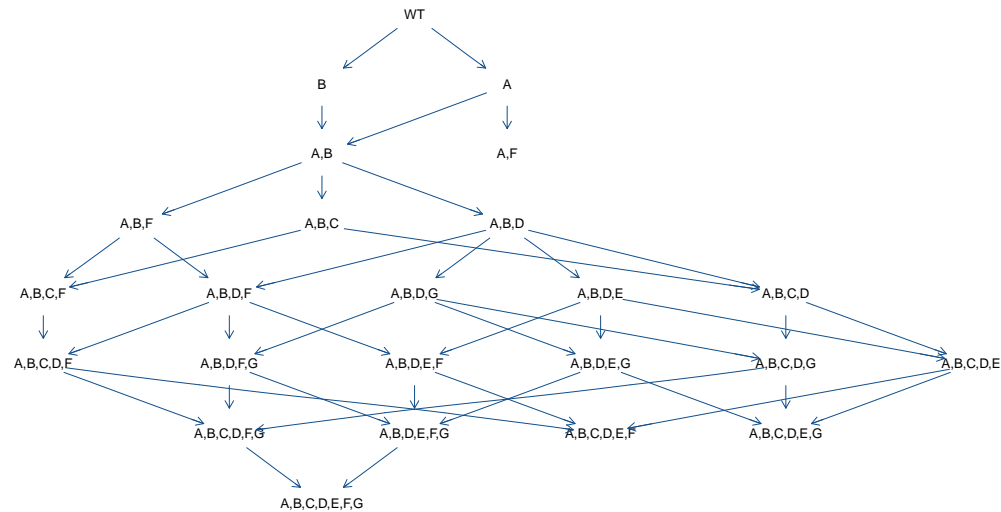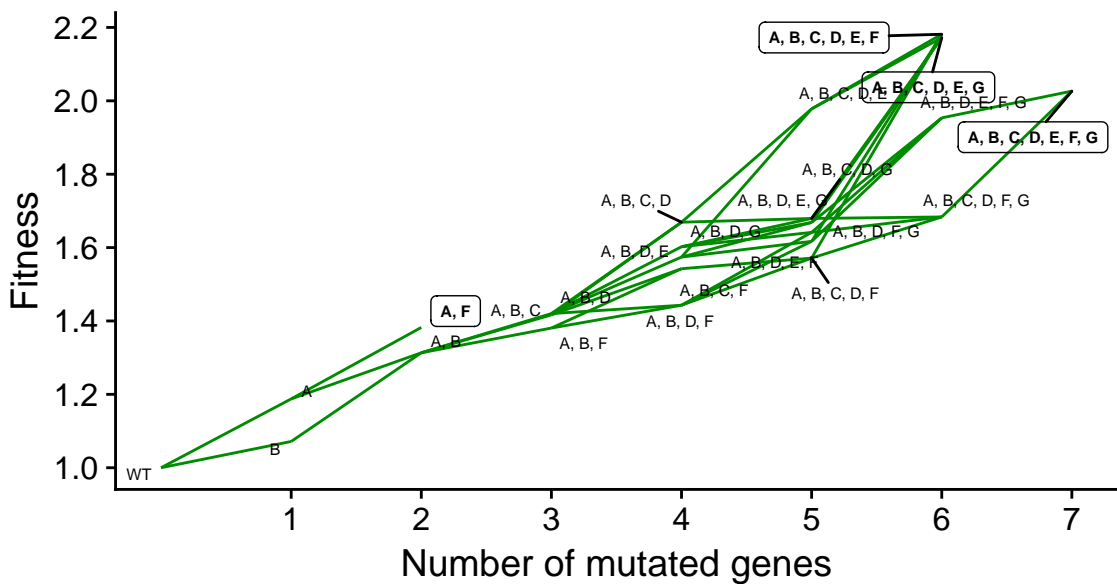

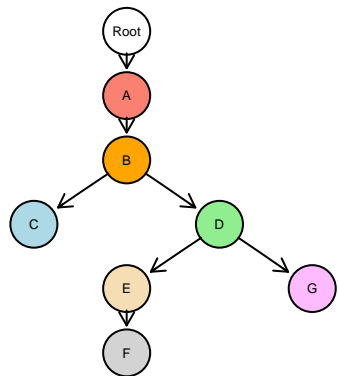

ID ejQdvM3QTzcrMUgC  
 acc genotypes 16  
 peaks no back 4  
 removed edges 4  
 prop rem edges 0.16

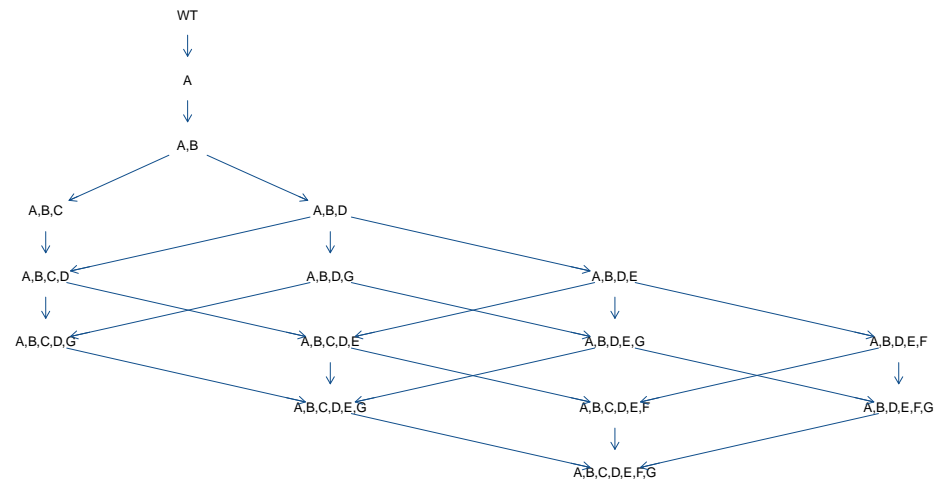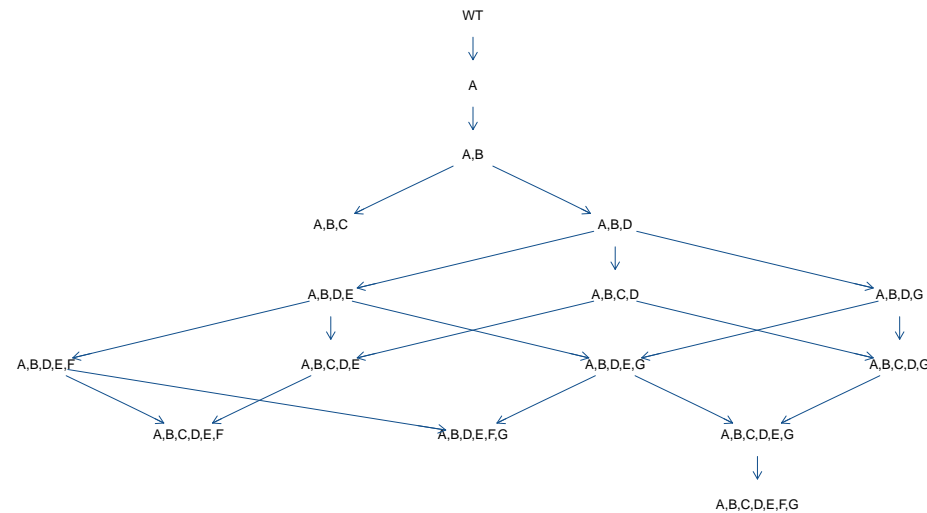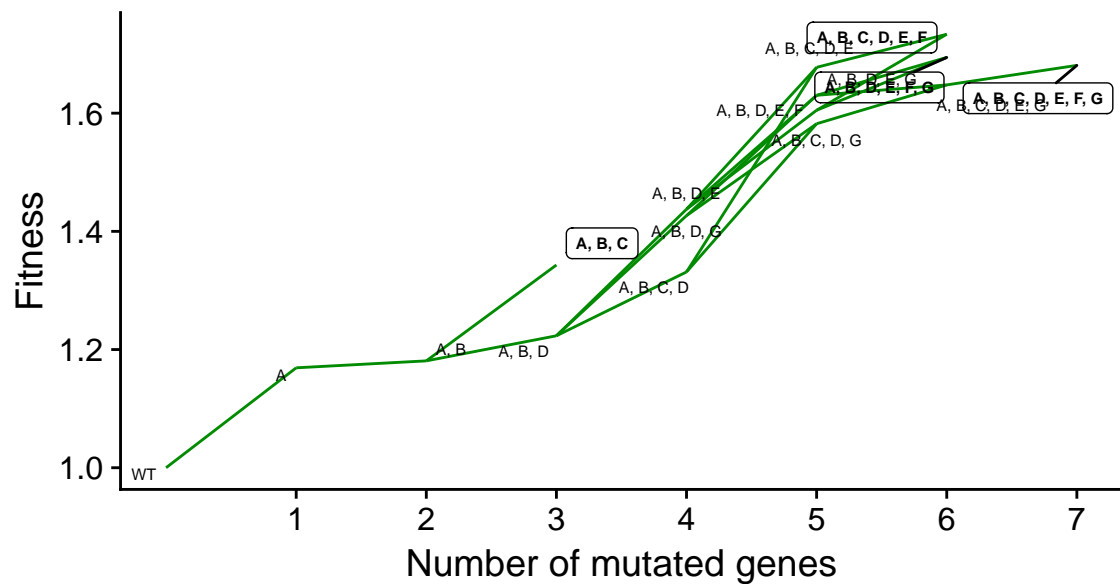

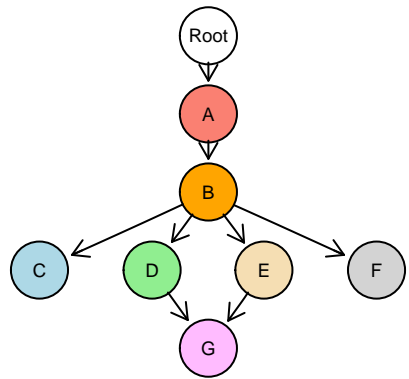

ID eNAunG4FXtpwgDbz  
 acc genotypes 22  
 peaks no back 4  
 removed edges 9  
 prop rem edges 0.214

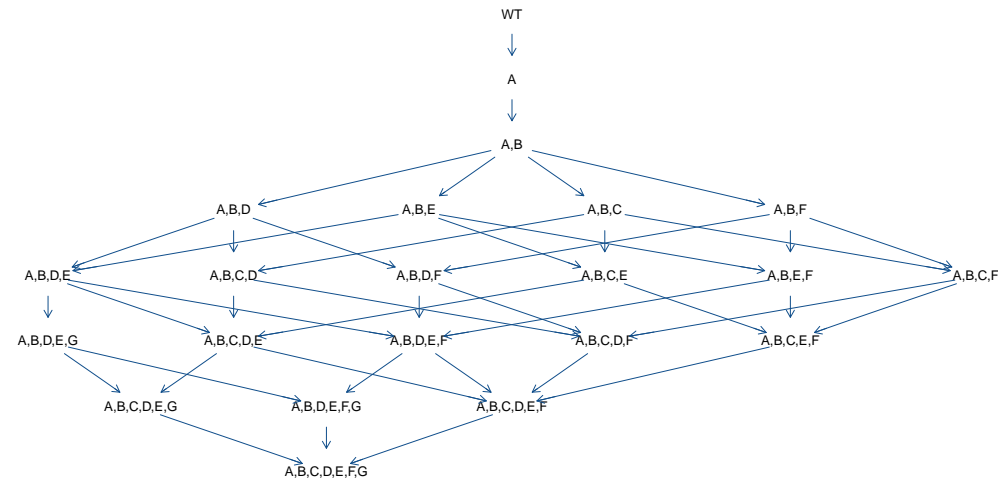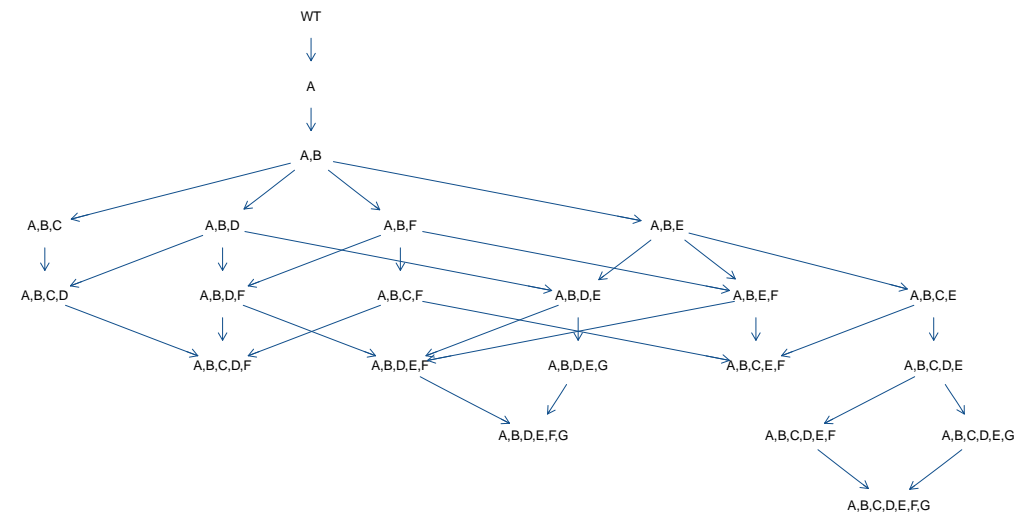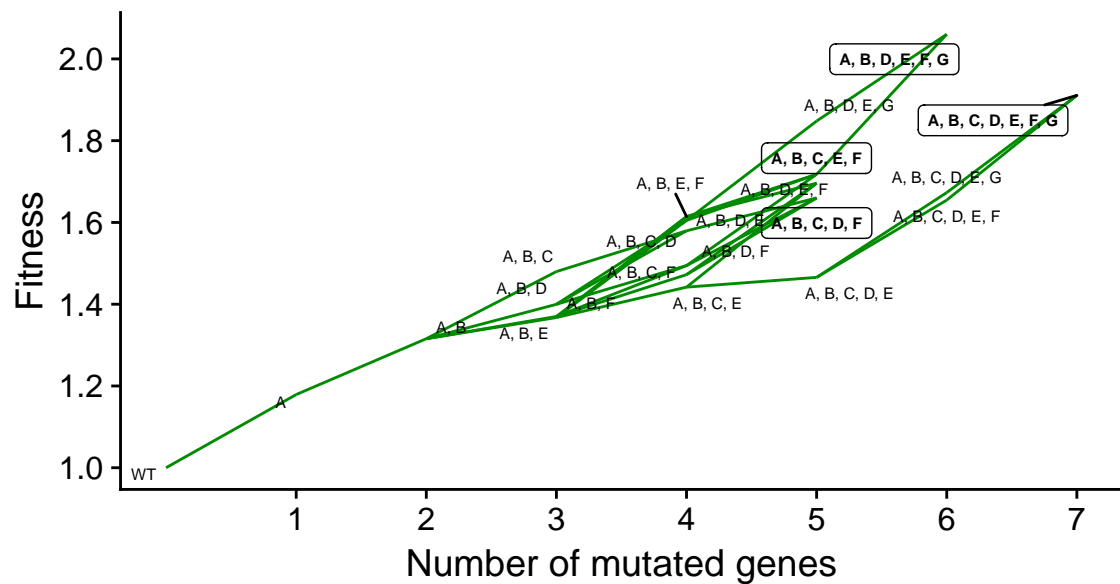

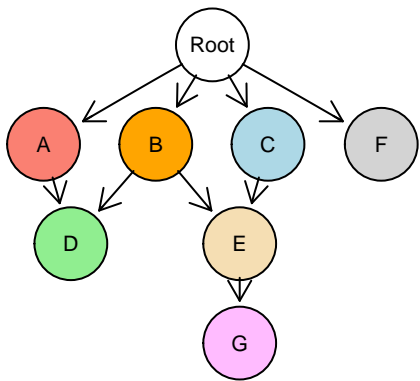

ID eO96nNtKZRtCYFxB  
 acc genotypes 32  
 peaks no back 6  
 removed edges 10  
 prop rem edges 0.152

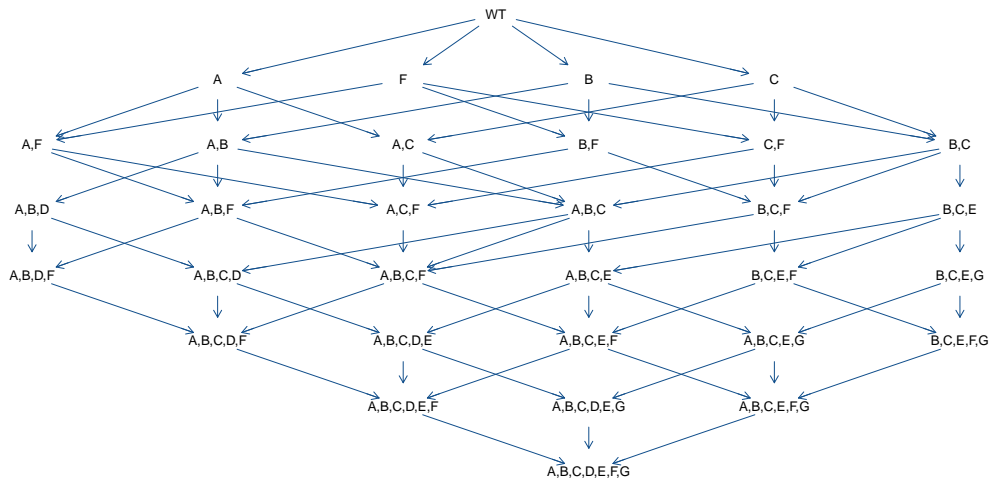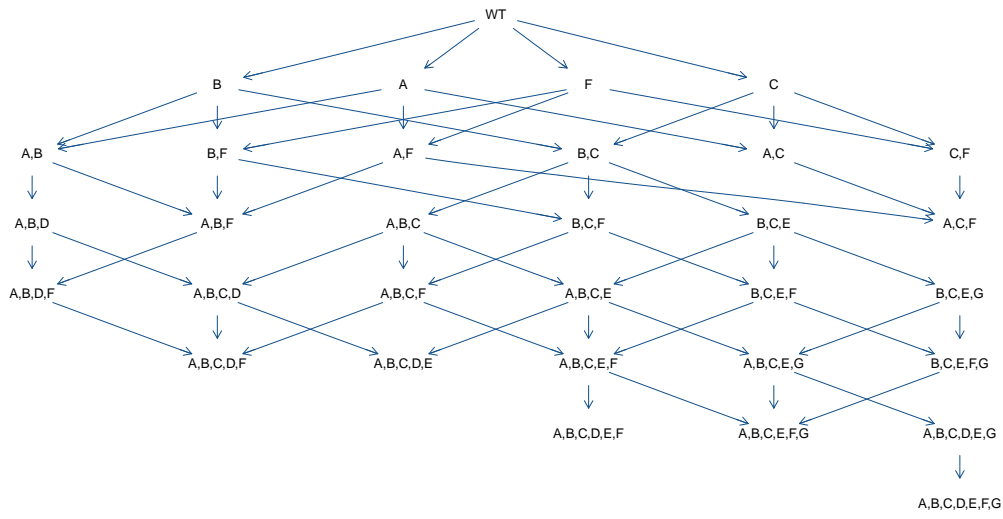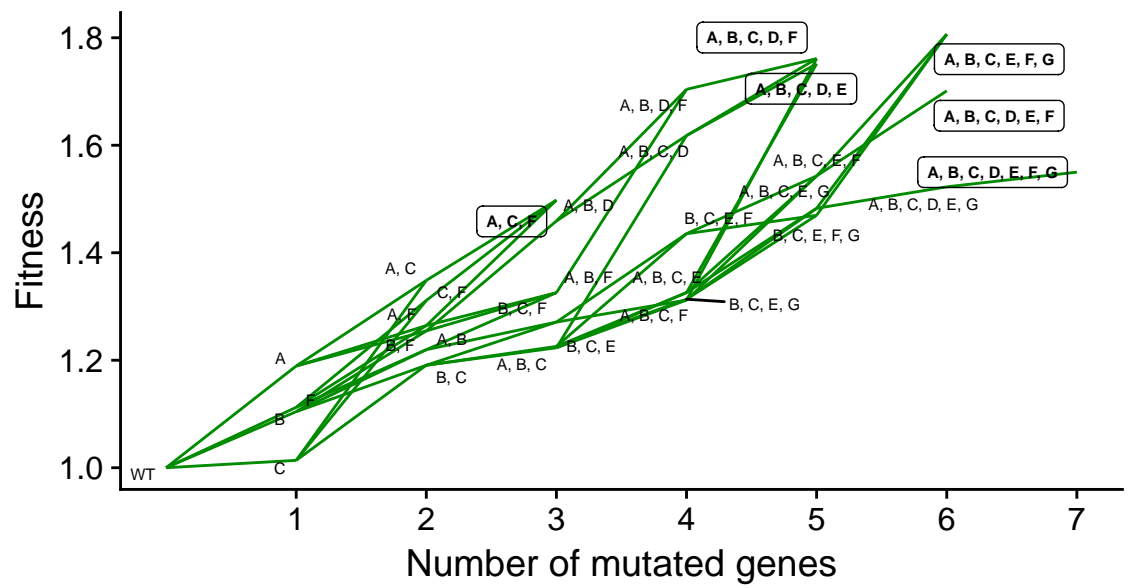

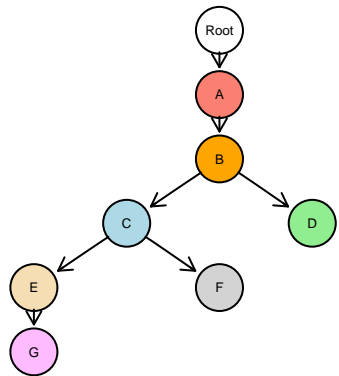

*ID* EtcHaQHBlbljaZQ  
*acc genotypes* 16  
*peaks no back* 2  
*removed edges* 2  
*prop rem edges* 0.08

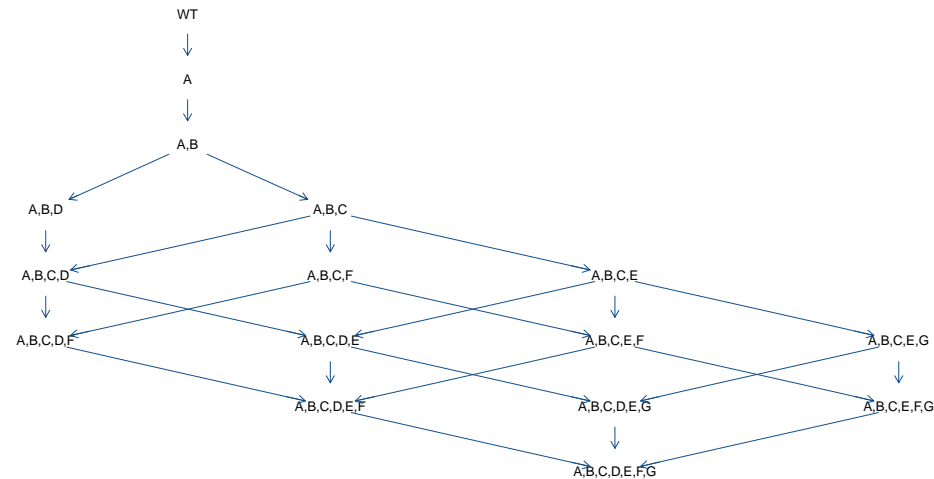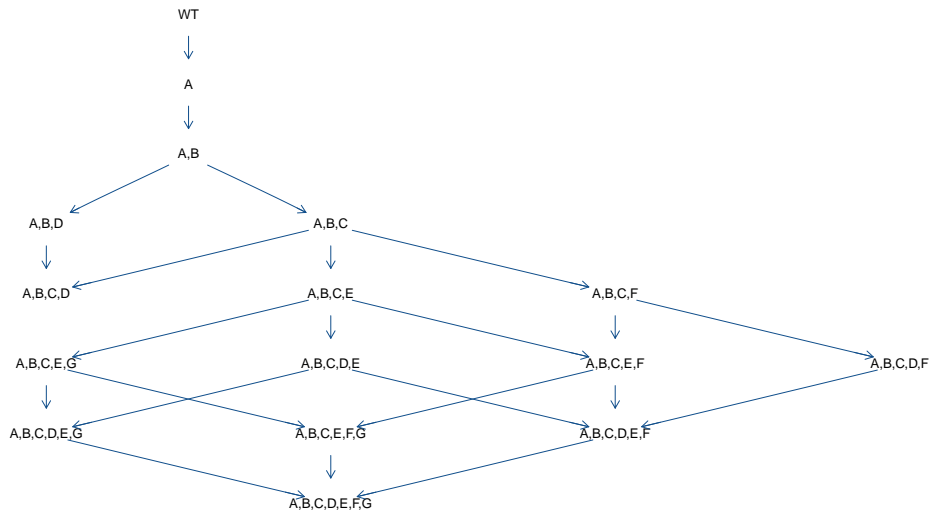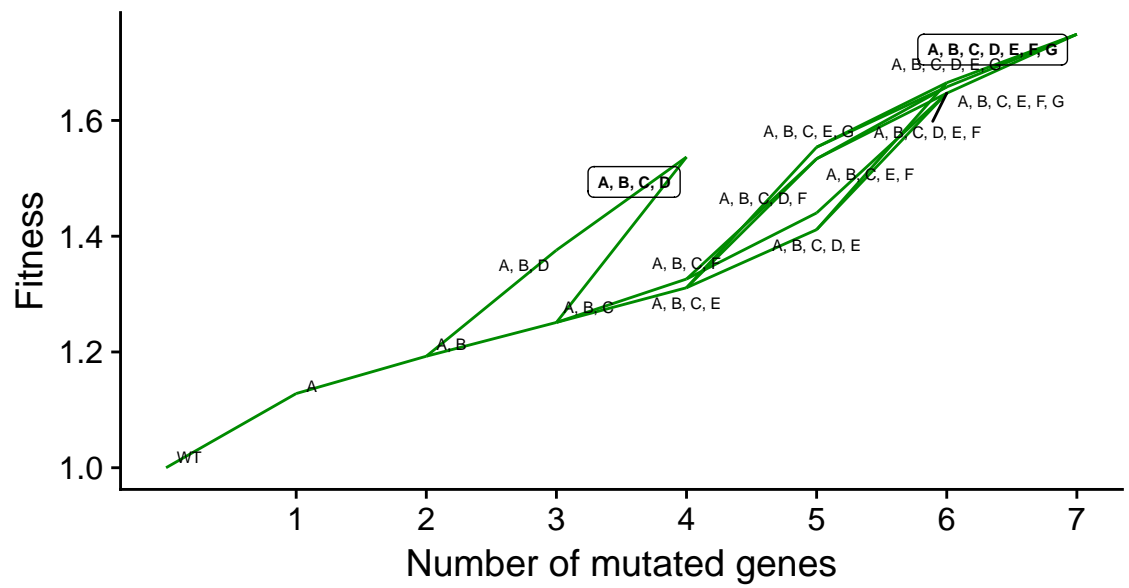

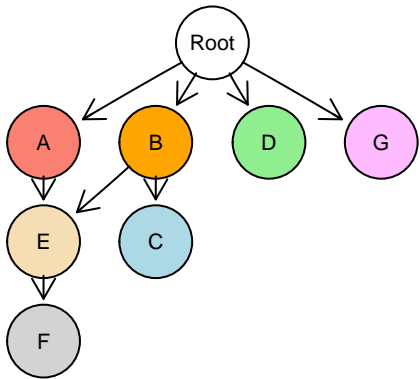

ID **f103IT84L6WhInZWQ**  
 acc genotypes **40**  
 peaks no back **5**  
 removed edges **13**  
 prop rem edges **0.141**

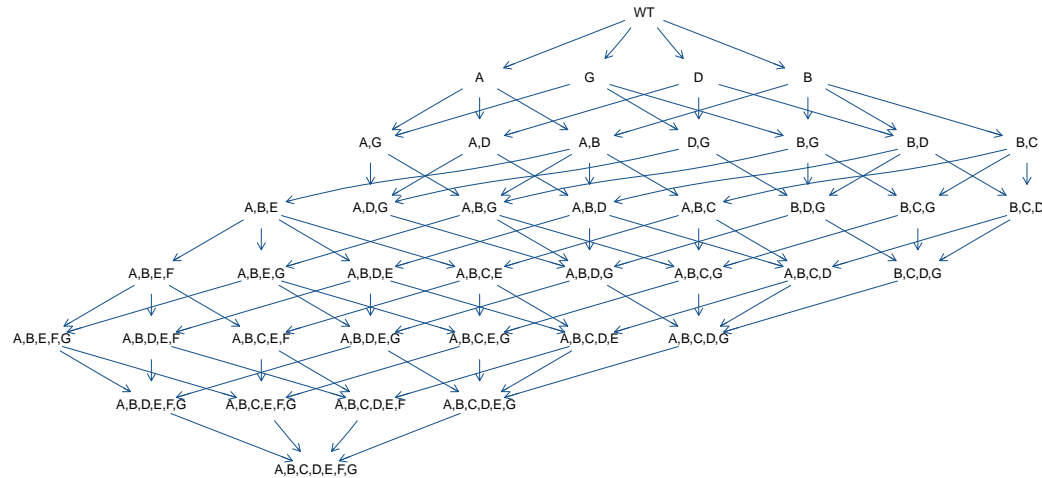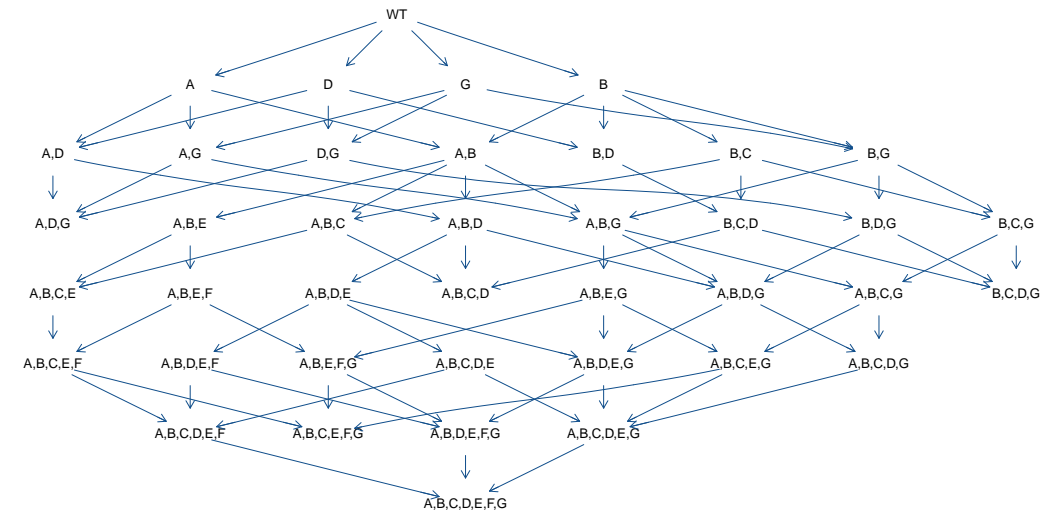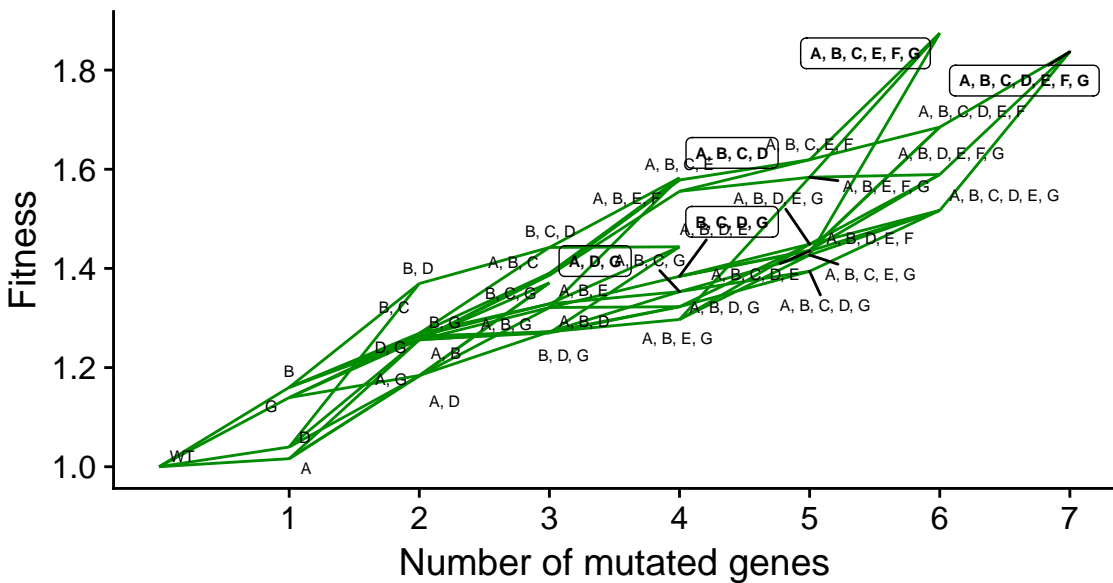



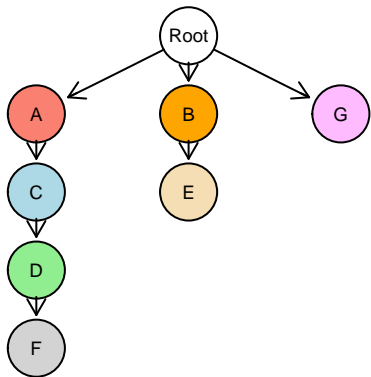

ID **Fhyo3U5P7710LvXb**  
 acc genotypes **30**  
 peaks no back **6**  
 removed edges **8**  
 prop rem edges **0.136**

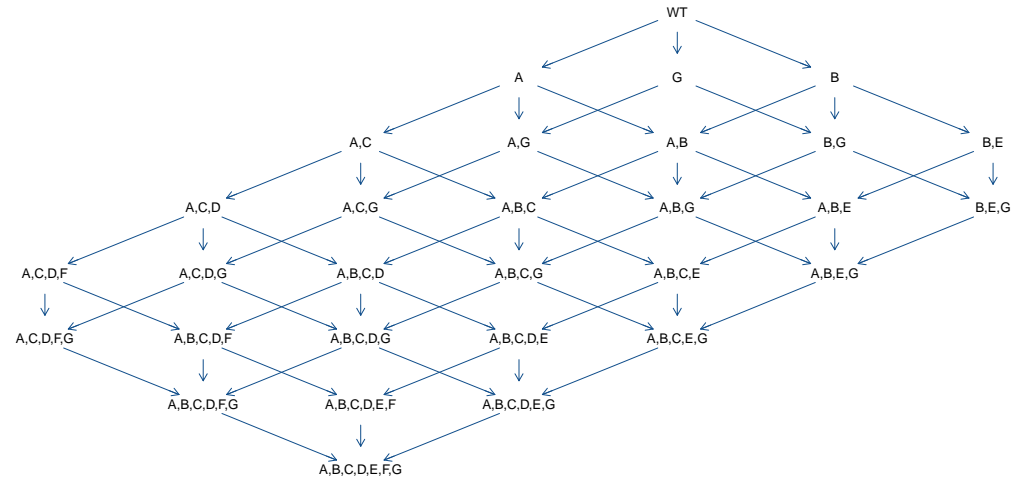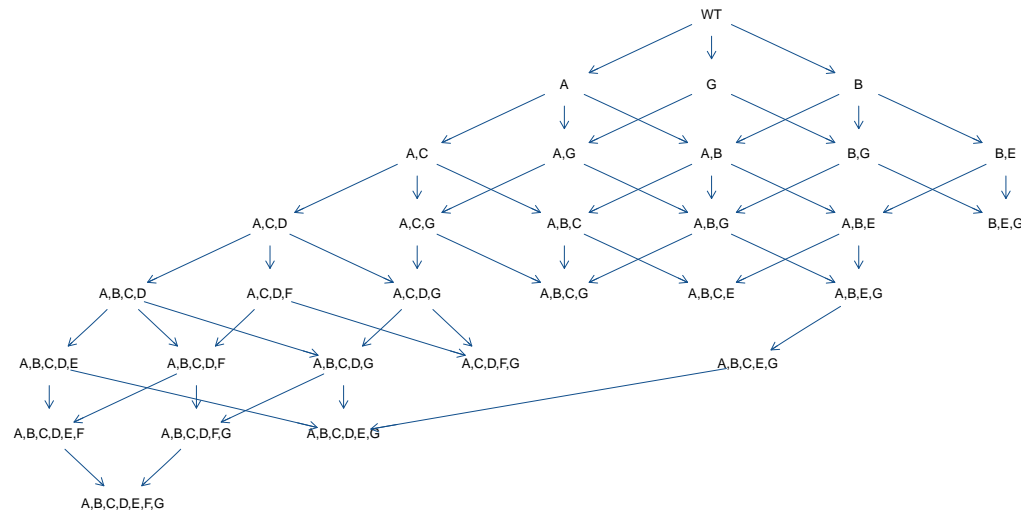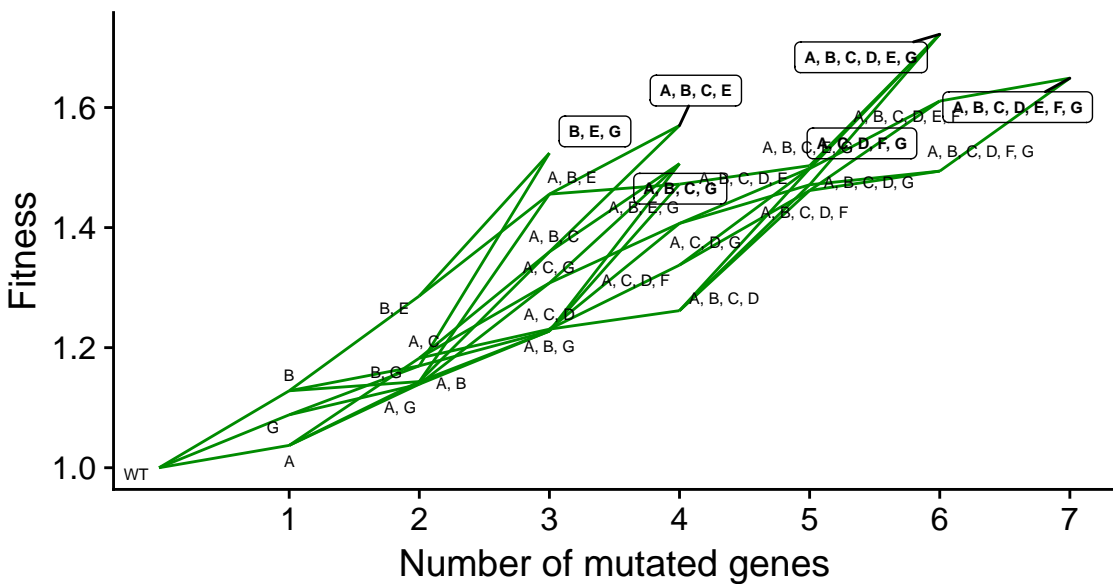

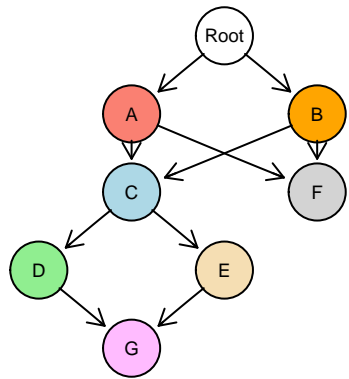

ID **FJcdcp4ZT1UXIBCC**  
 acc genotypes **15**  
 peaks no back **3**  
 removed edges **3**  
 prop rem edges **0.136**

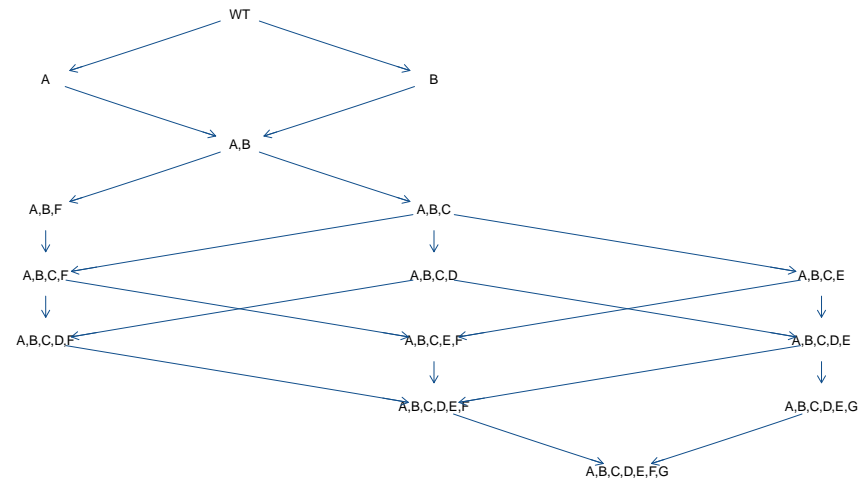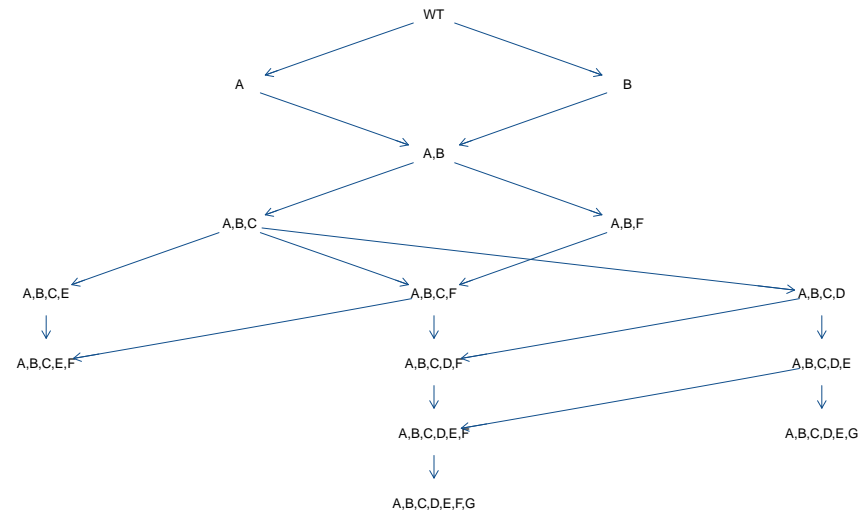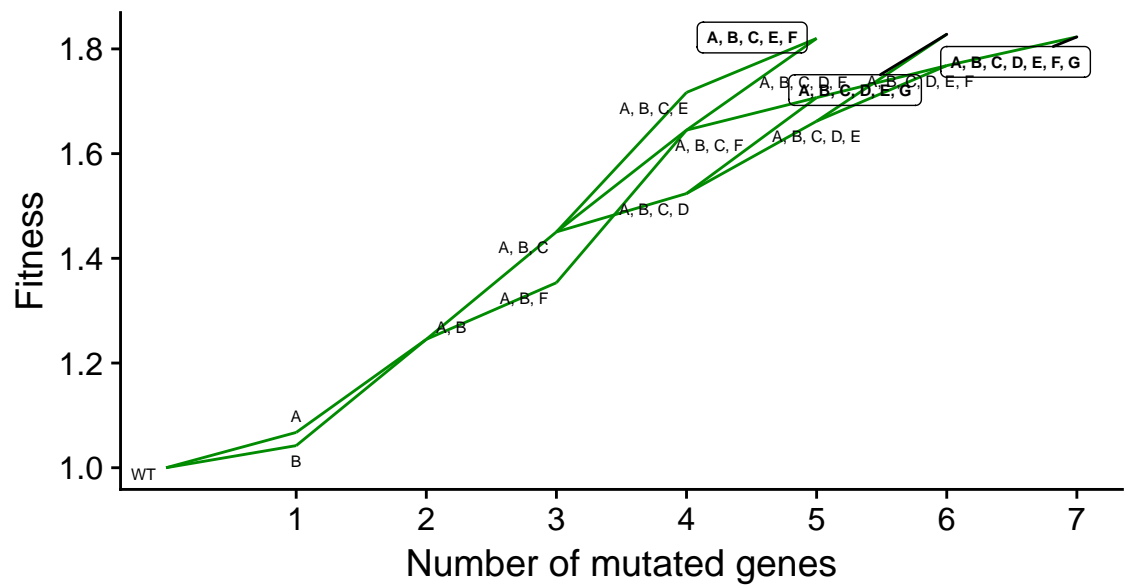

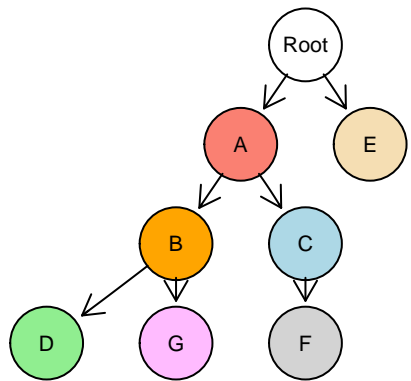

ID **FMNyhwR9SOSPPYf**  
 acc genotypes **32**  
 peaks no back **6**  
 removed edges **15**  
 prop rem edges **0.221**

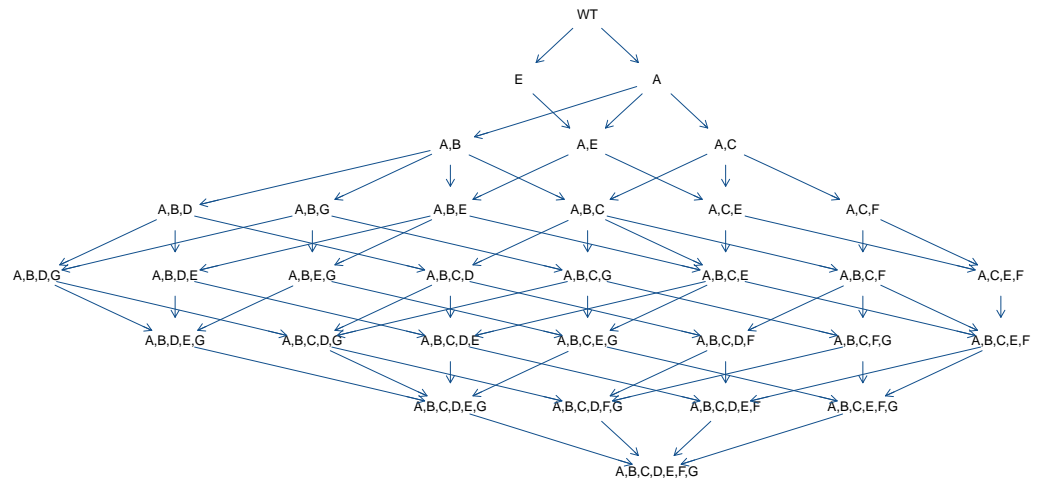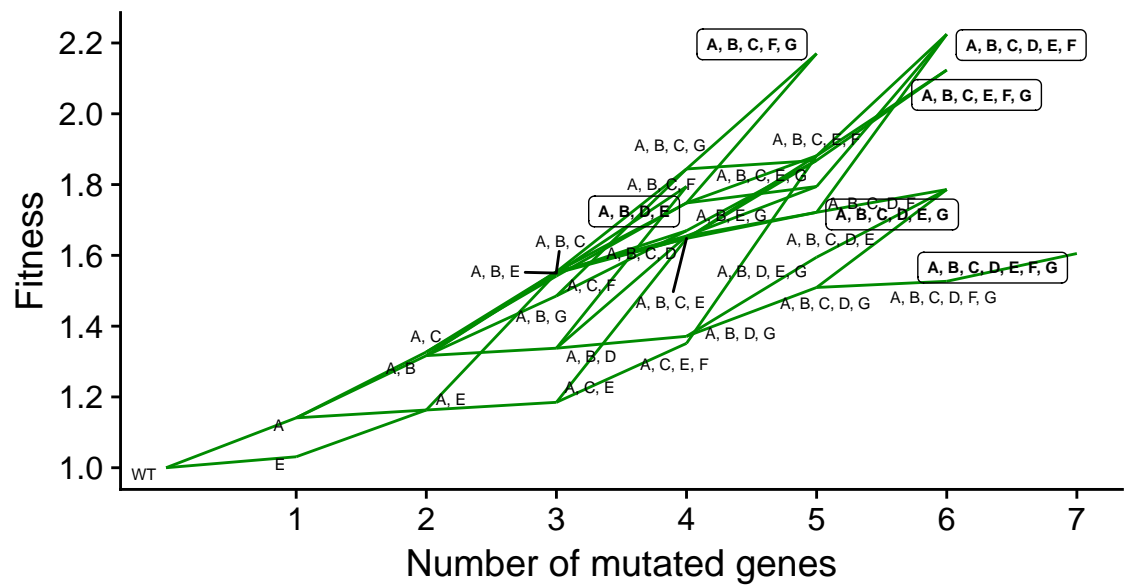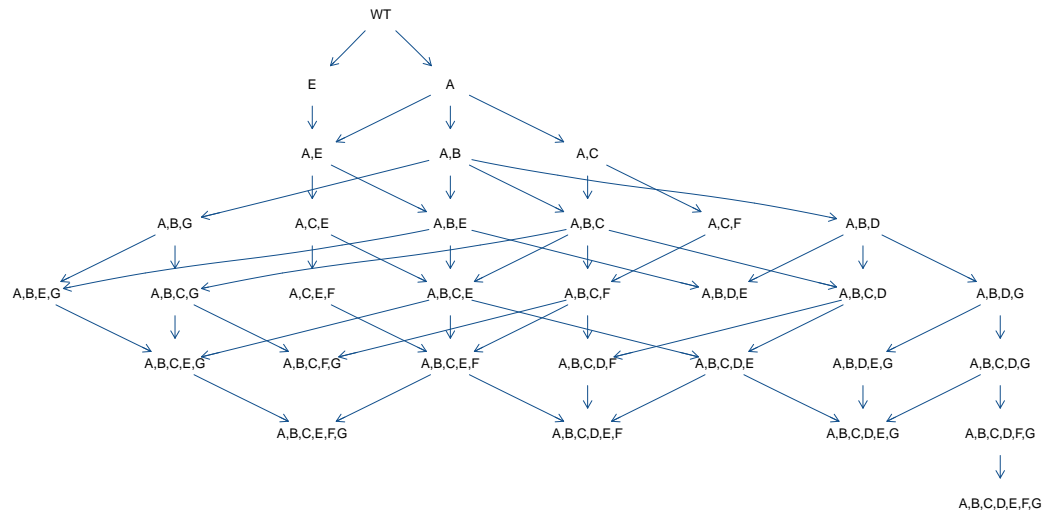

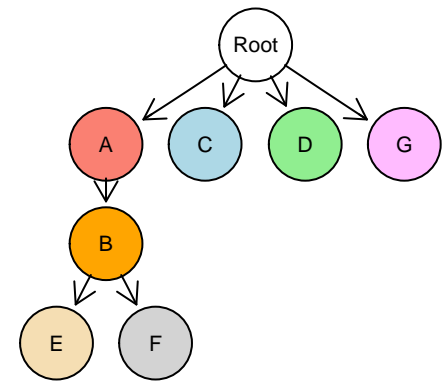

ID **FTNjYxURUcCxqz9**  
 acc genotypes **48**  
 peaks no back **9**  
 removed edges **27**  
 prop rem edges **0.225**

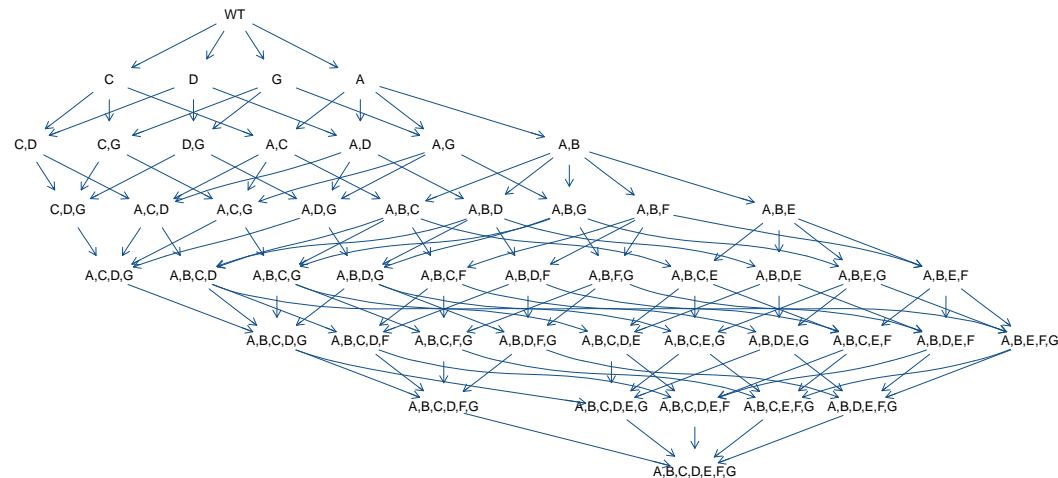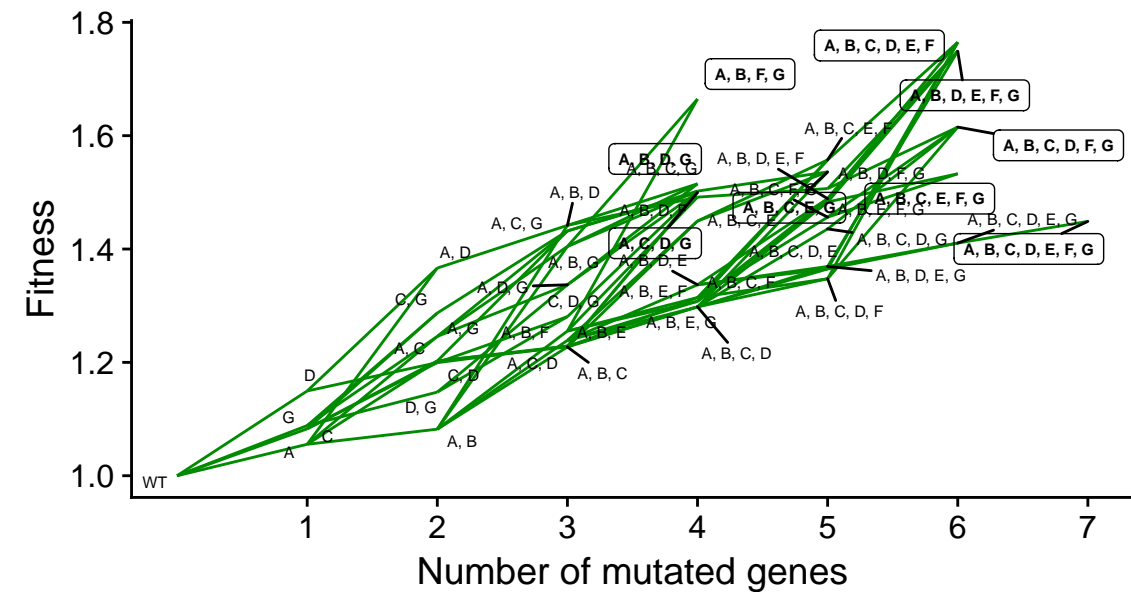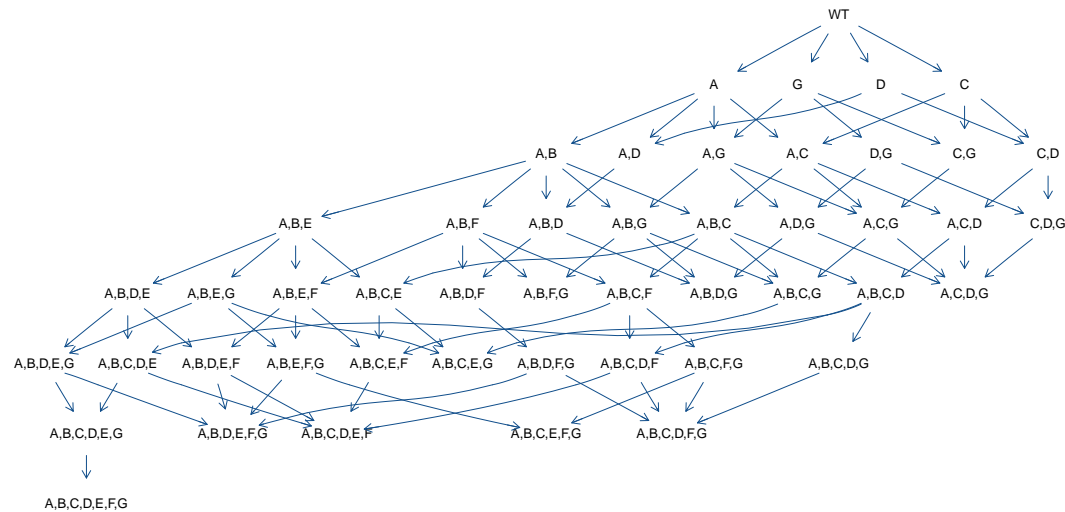

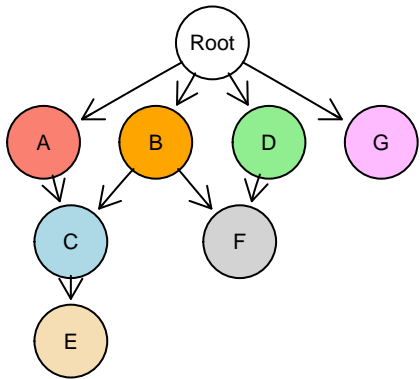

ID **ftXUauhtPgpyyoHR**  
 acc genotypes **32**  
 peaks no back **5**  
 removed edges **15**  
 prop rem edges **0.227**

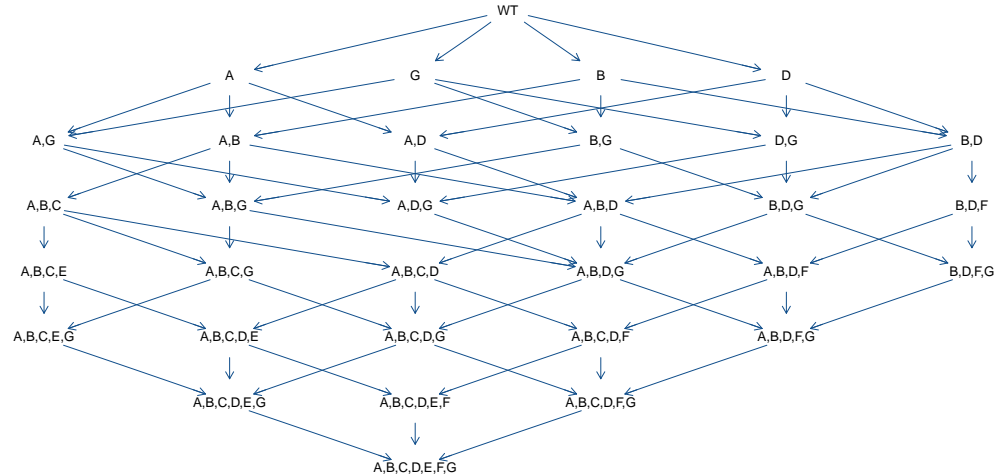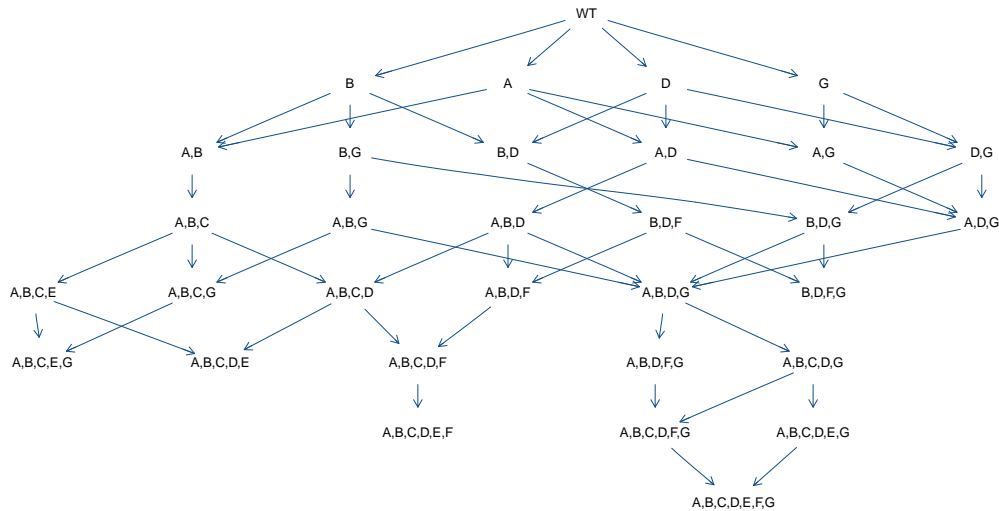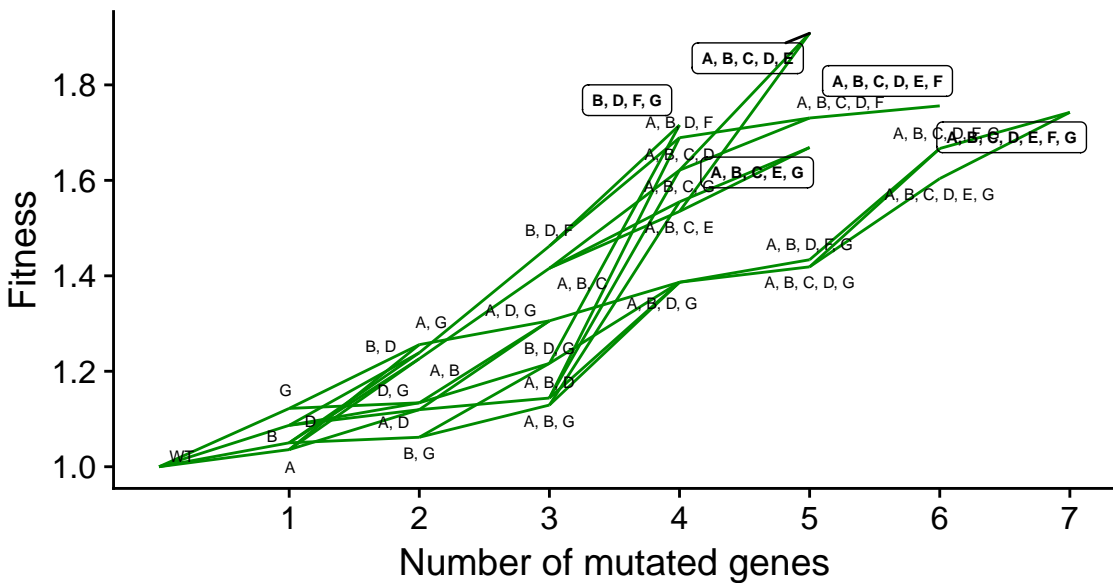

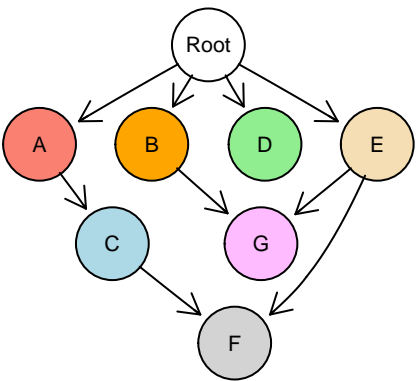

ID **fW757Yty4nJQzn3B**  
 acc genotypes **36**  
 peaks no back **5**  
 removed edges **10**  
 prop rem edges **0.128**

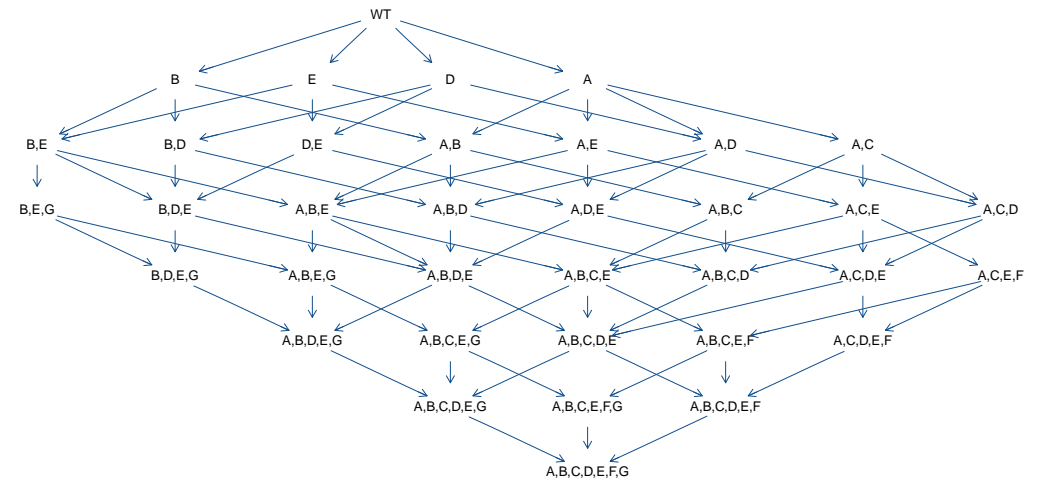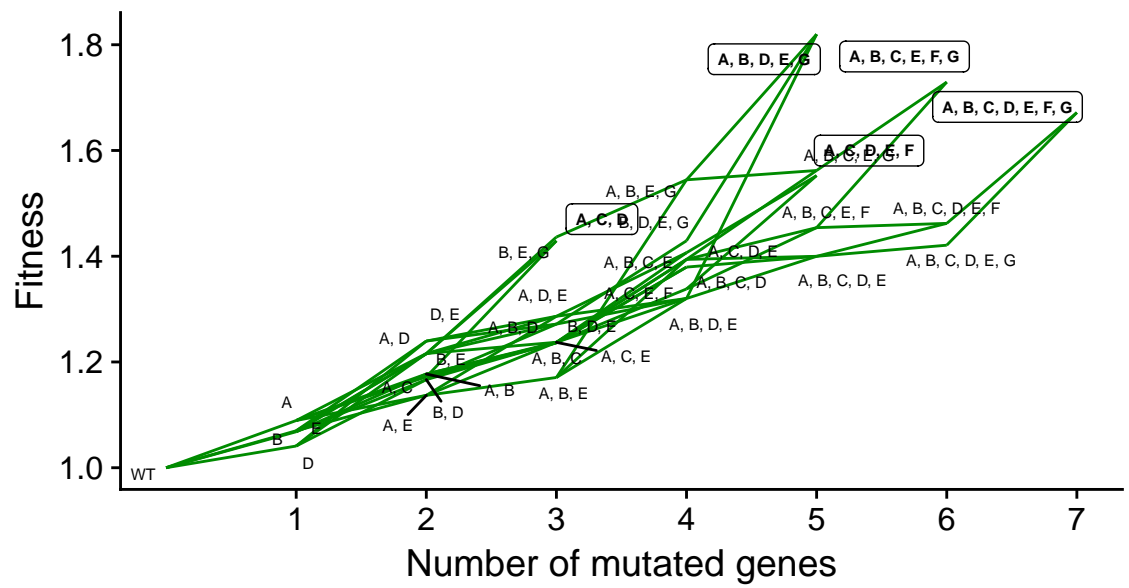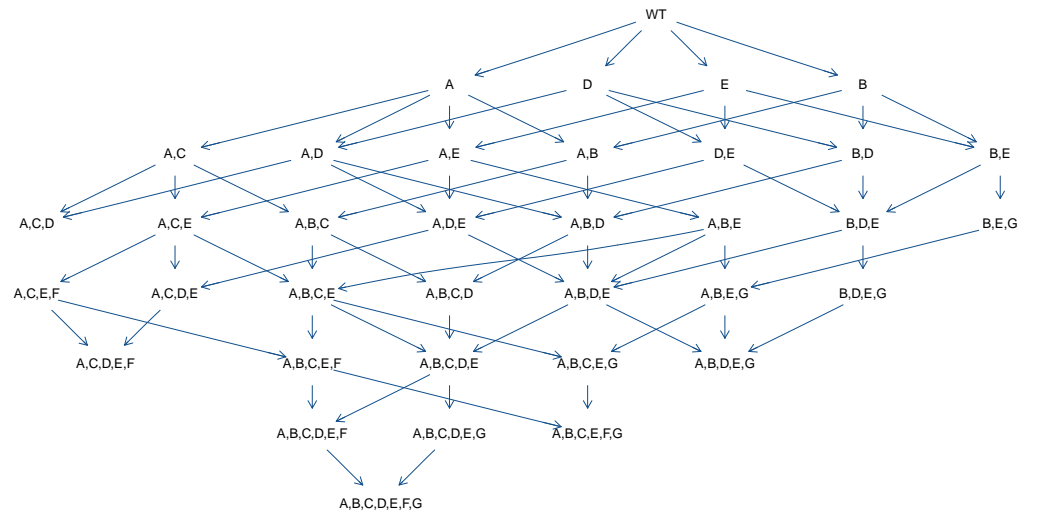

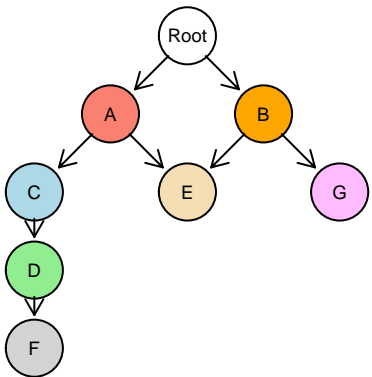

ID **g38nzkCLq72TPfvC**  
 acc genotypes **23**  
 peaks no back **5**  
 removed edges **8**  
 prop rem edges **0.2**

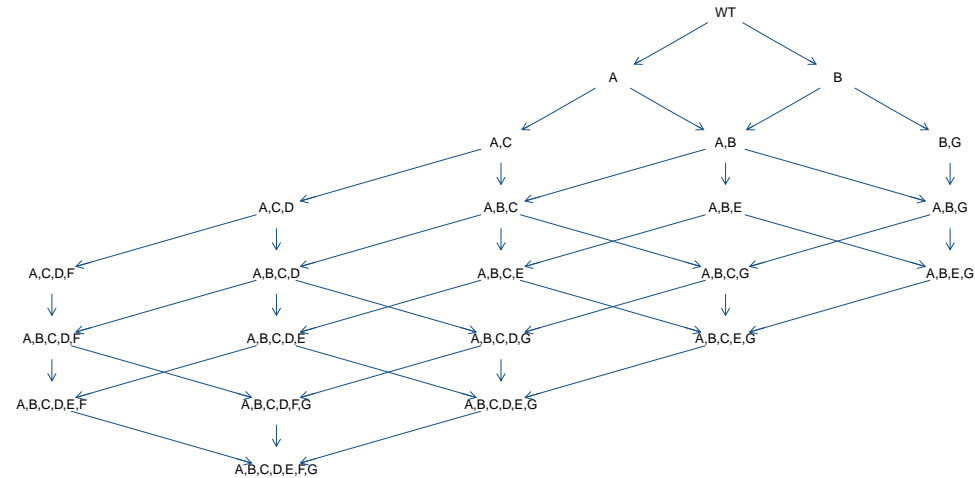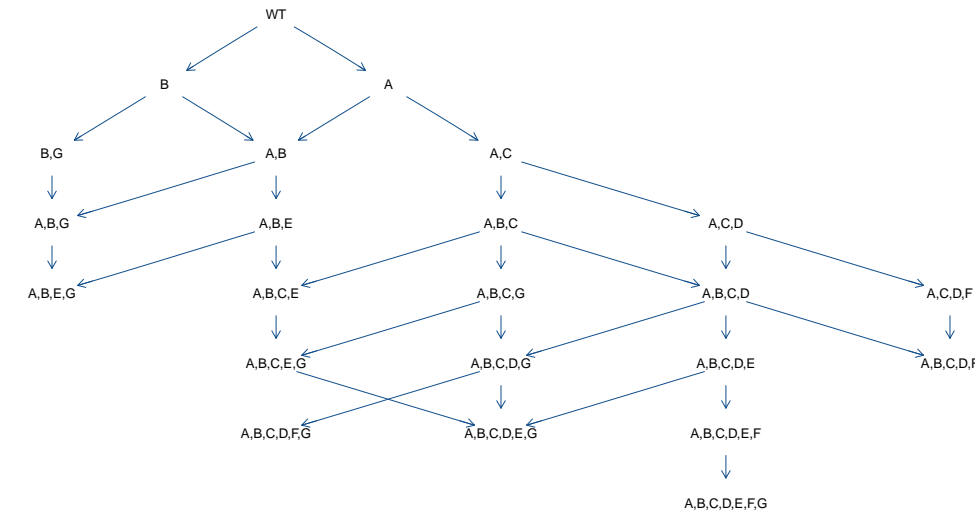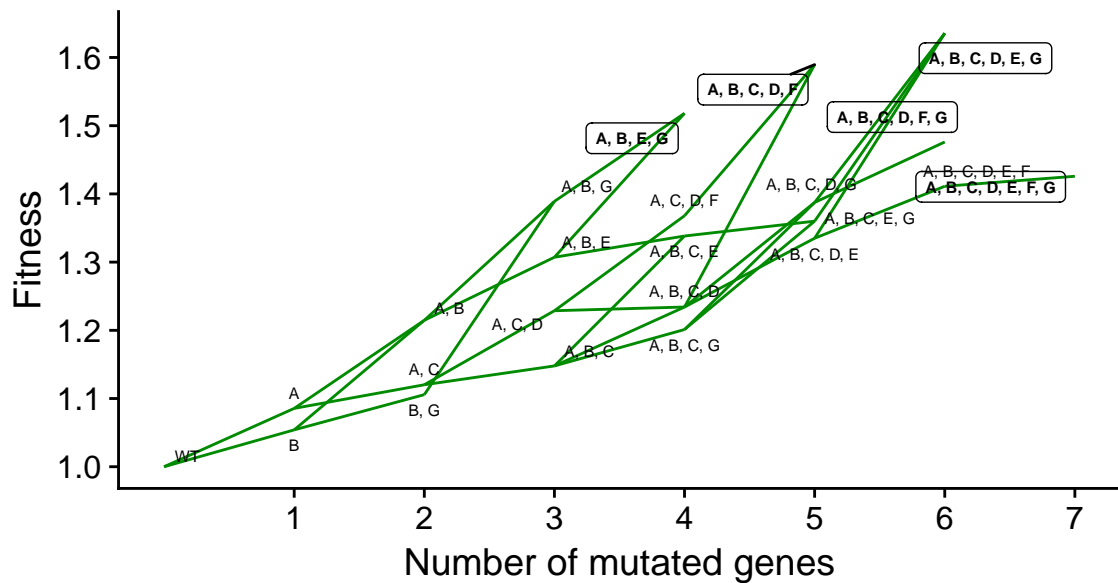

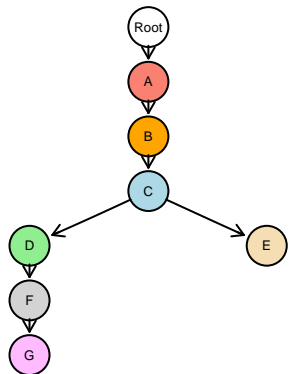

ID **GedZaWDeb1029Mf88**  
 acc genotypes **11**  
 peaks no back **2**  
 removed edges **2**  
 prop rem edges **0.154**

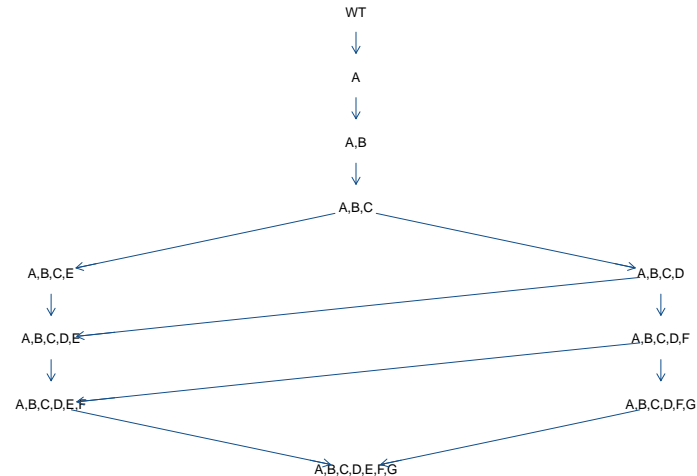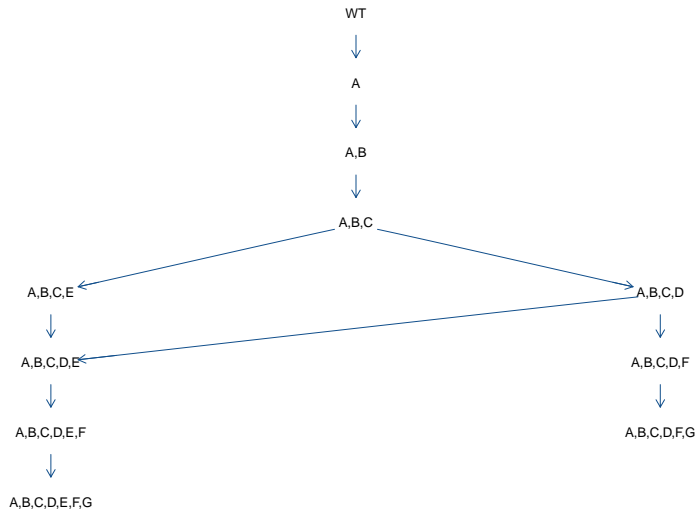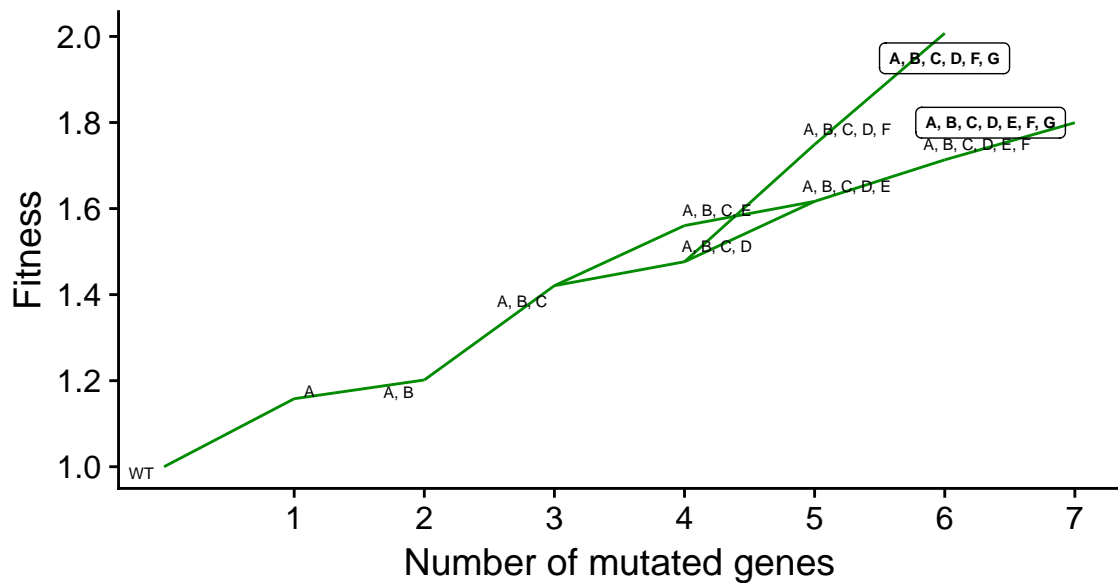



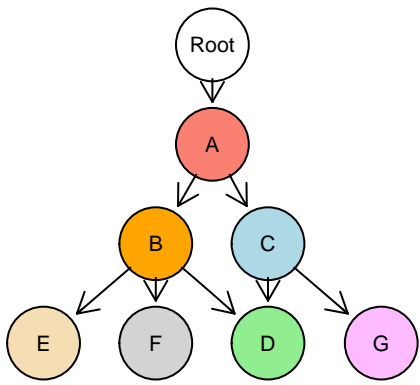

*ID* [gfkgoLnyr7gjNQkC](#)  
*acc genotypes* 24  
*peaks no back* 5  
*removed edges* 10  
*prop rem edges* 0.217

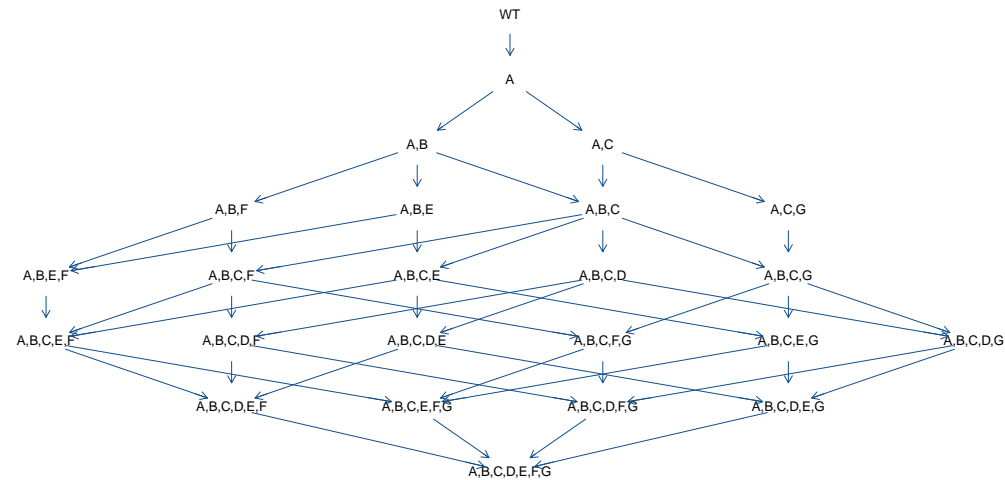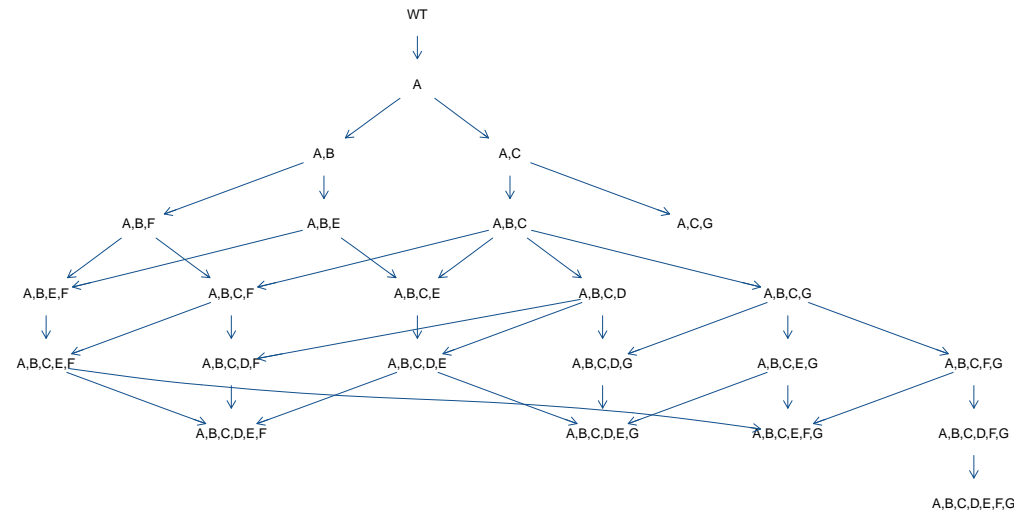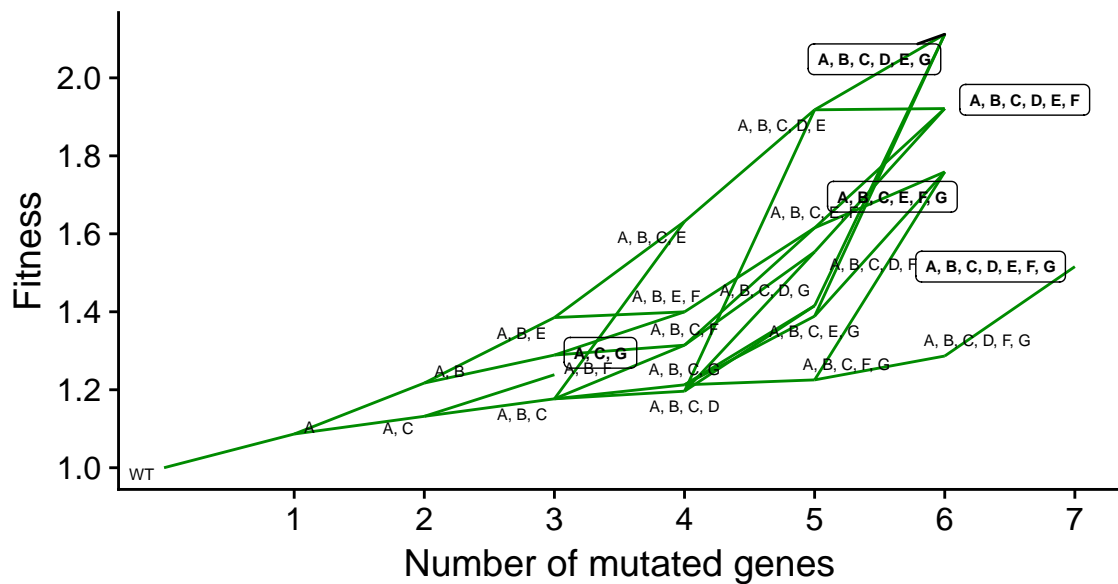

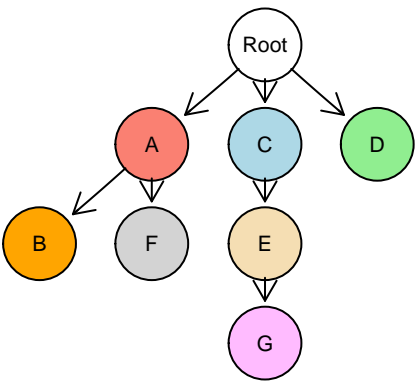

*ID* gKfKrRLHCElf6w8t  
*acc genotypes* 40  
*peaks no back* 2  
*removed edges* 8  
*prop rem edges* 0.089

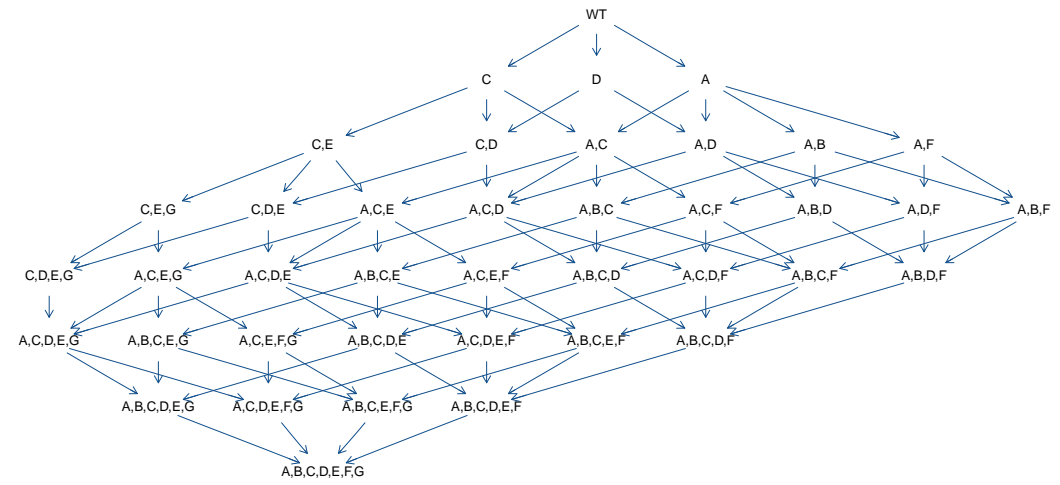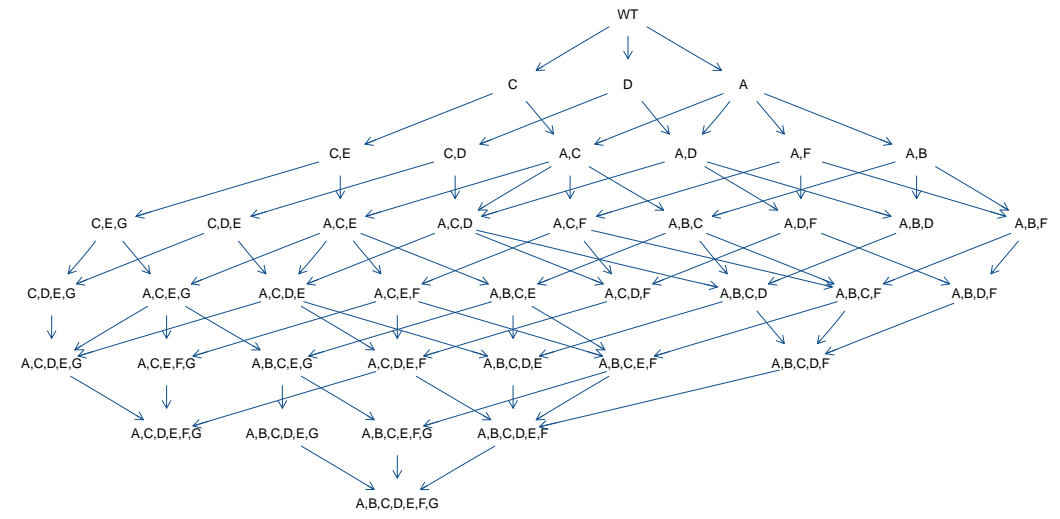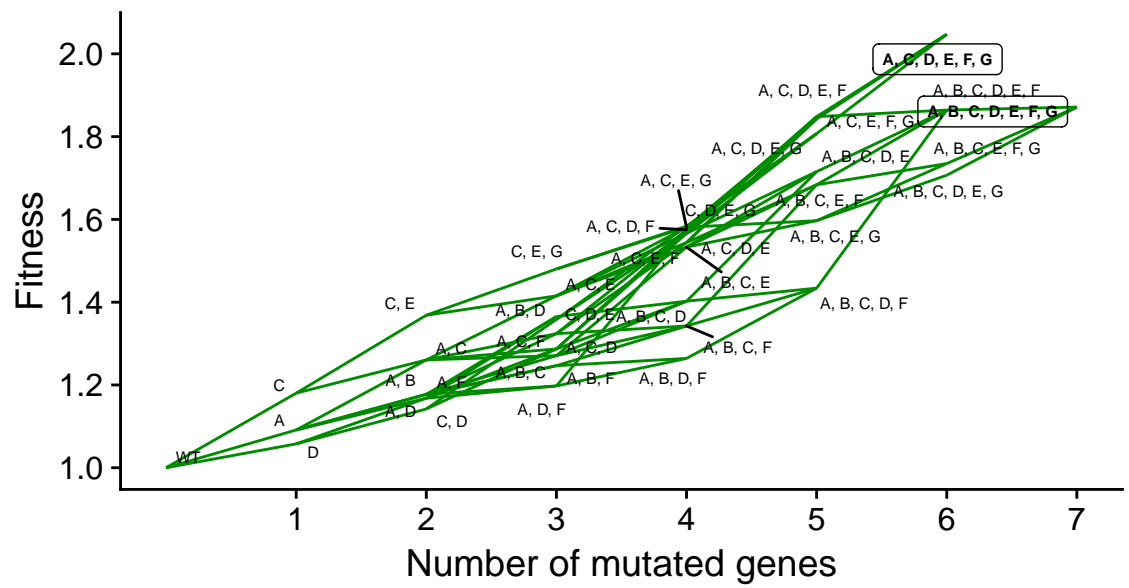

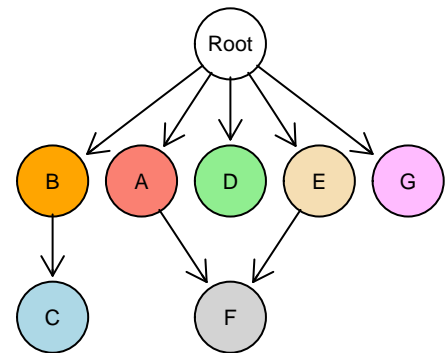

ID GM3TL5lyxTmLPLFB  
 acc genotypes 60  
 peaks no back 9  
 removed edges 25  
 prop rem edges 0.156

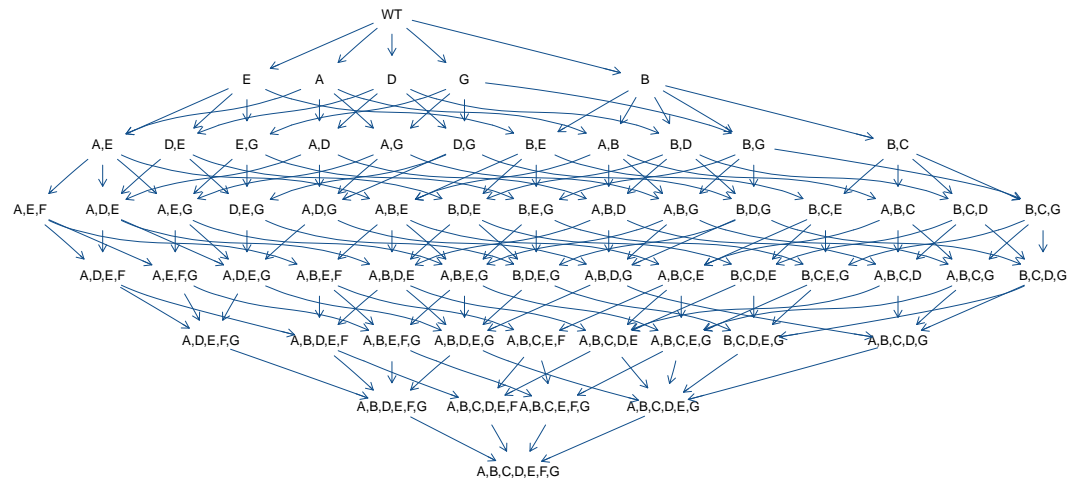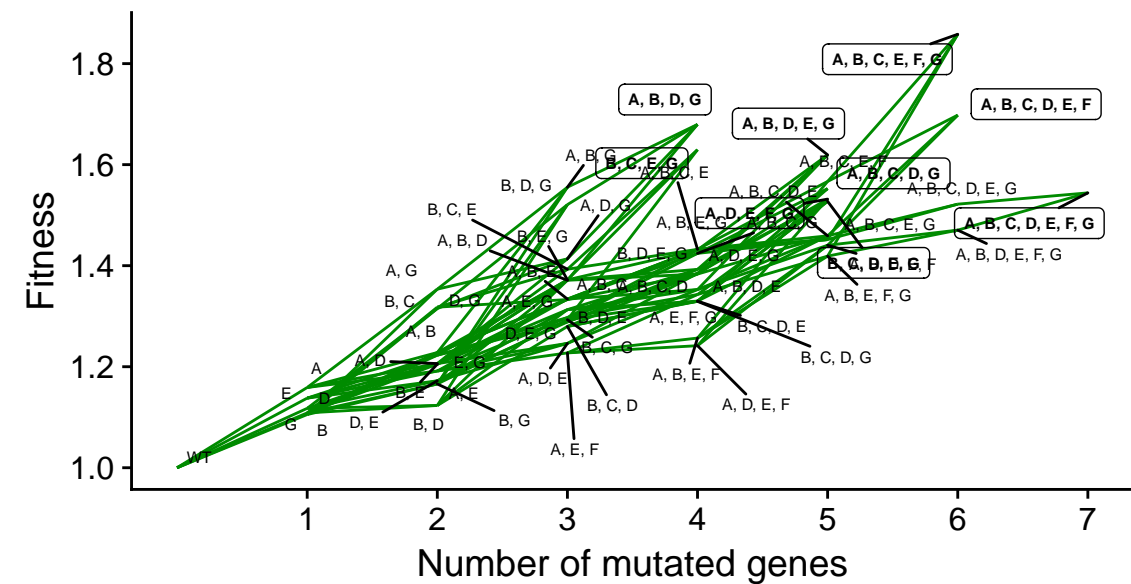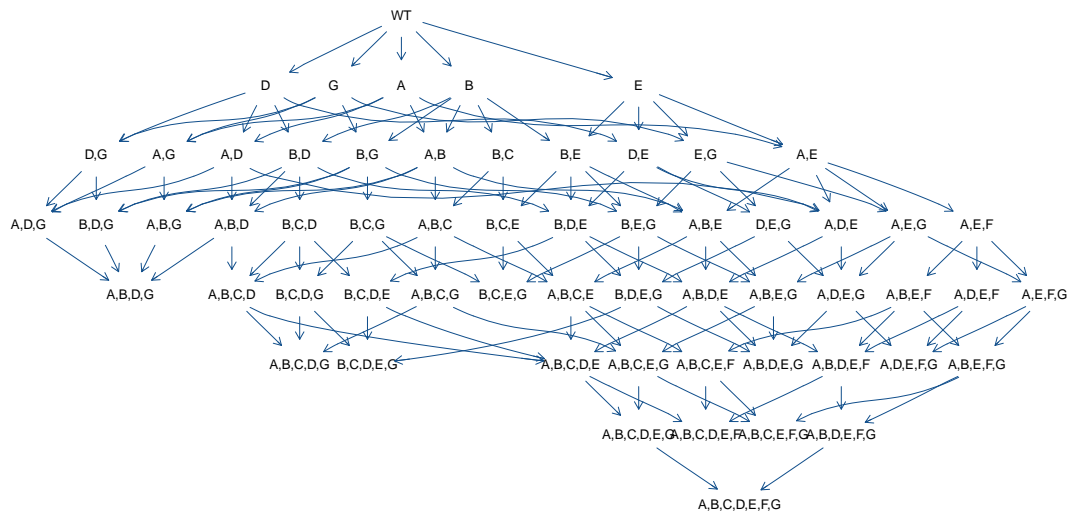

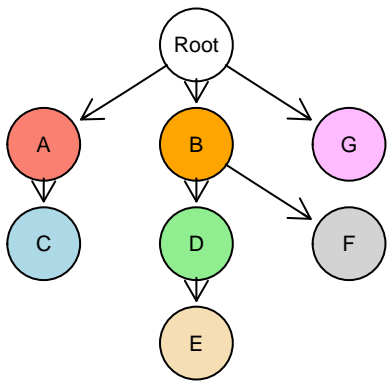

*ID* gOGMou3PVNxUeDQ5  
*acc genotypes* 42  
*peaks no back* 6  
*removed edges* 18  
*prop rem edges* 0.186

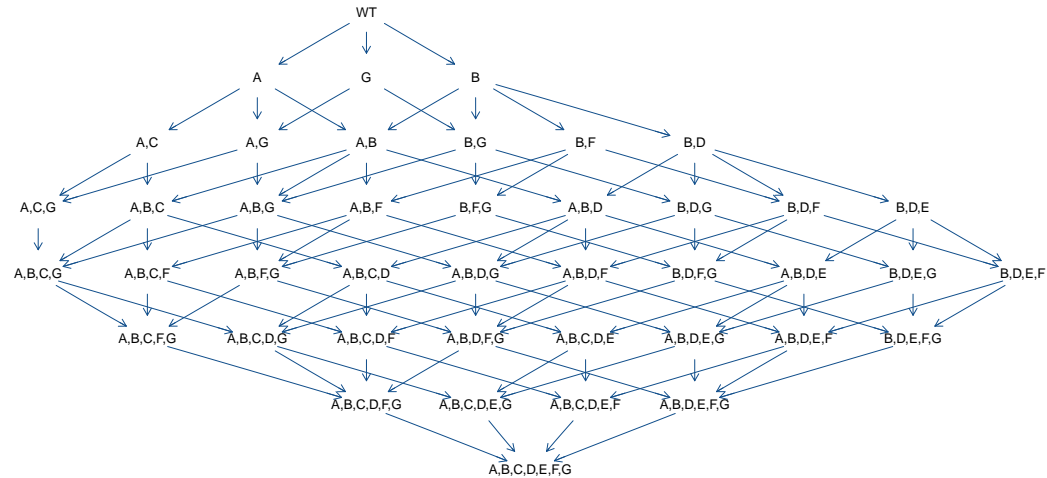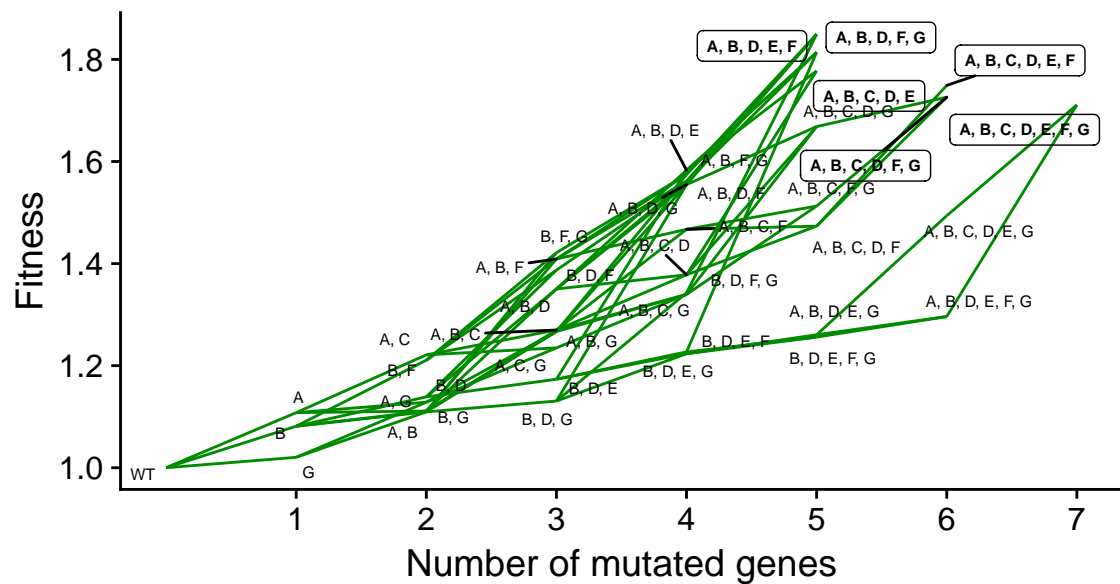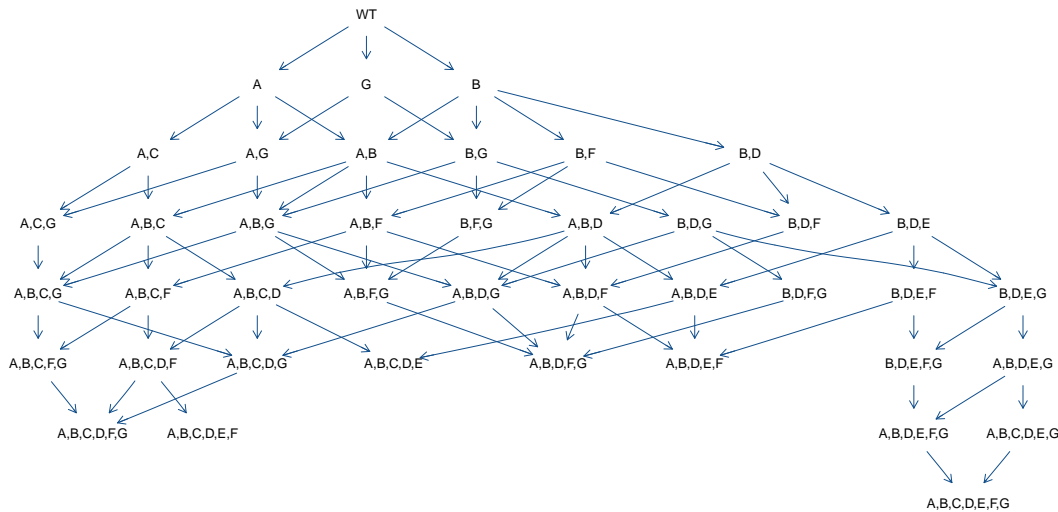

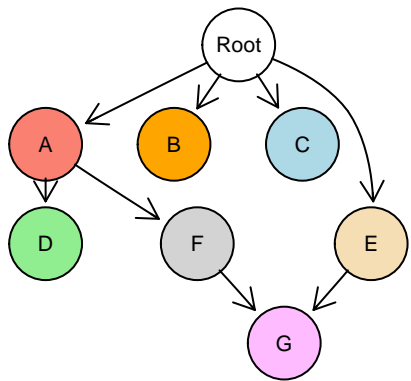

ID **GwFwG10TqvAnPNr82**  
 acc genotypes **48**  
 peaks no back **7**  
 removed edges **33**  
 prop rem edges **0.275**

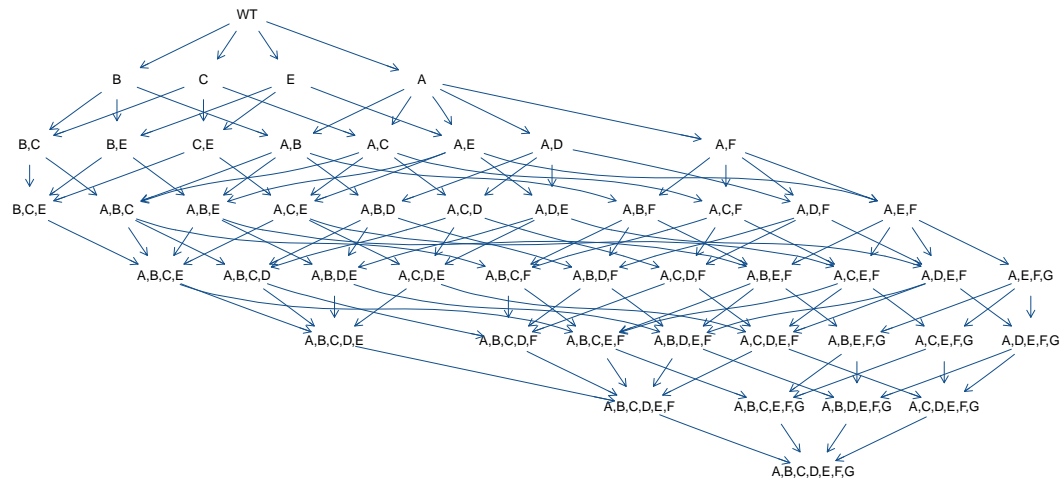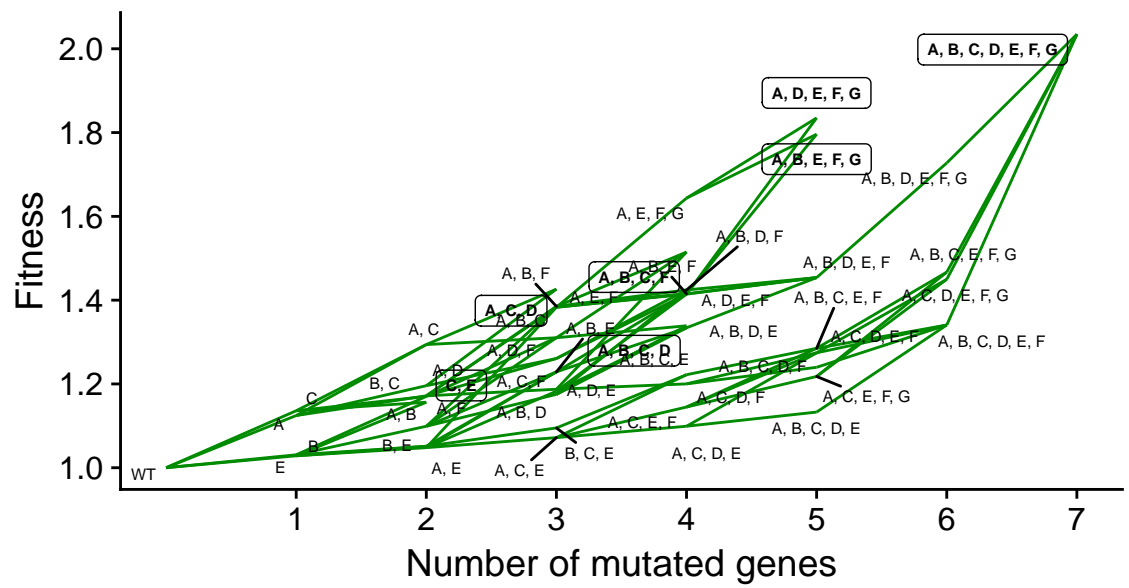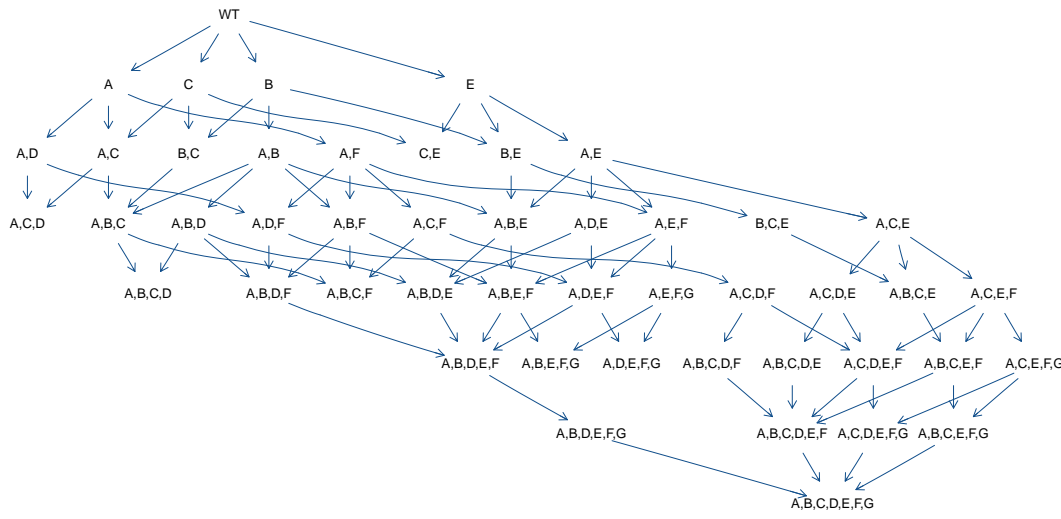

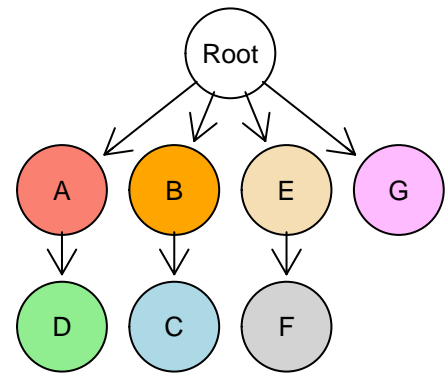

ID **haC6AnZXOHVkOVUX**  
 acc genotypes **54**  
 peaks no back **6**  
 removed edges **21**  
 prop rem edges **0.156**

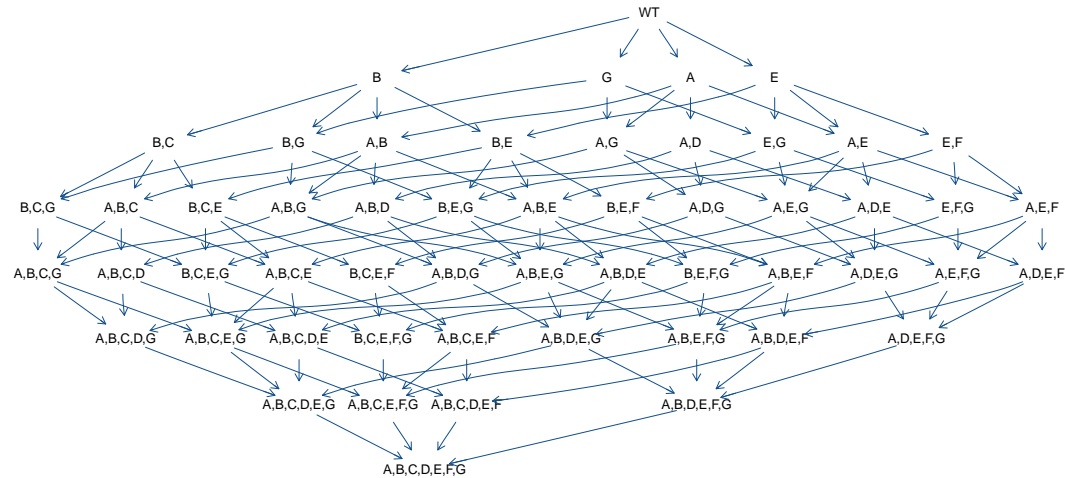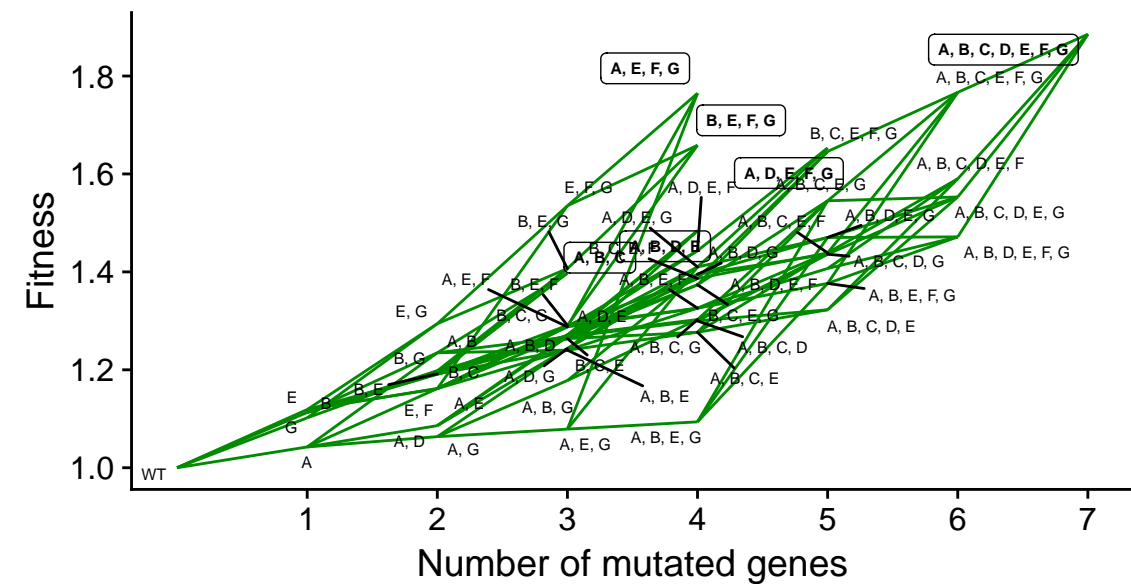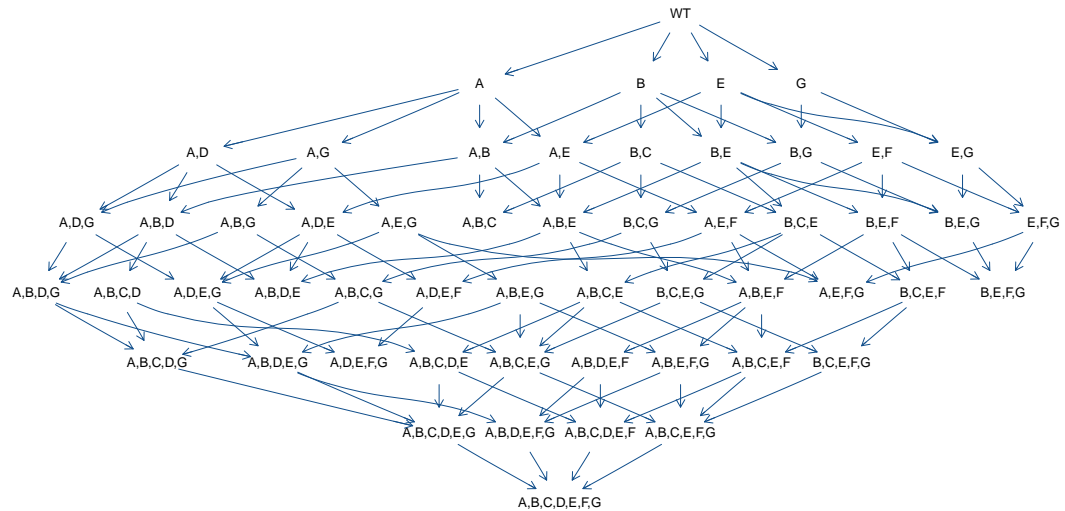

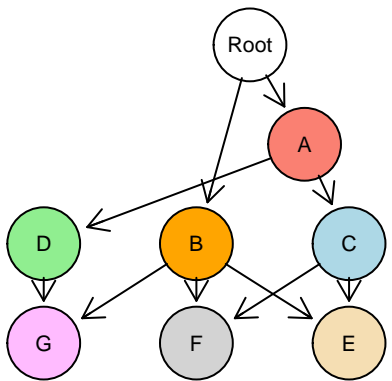

*ID* Hc4dDscce1OXyhX  
*acc genotypes* 21  
*peaks no back* 5  
*removed edges* 7  
*prop rem edges* 0.194

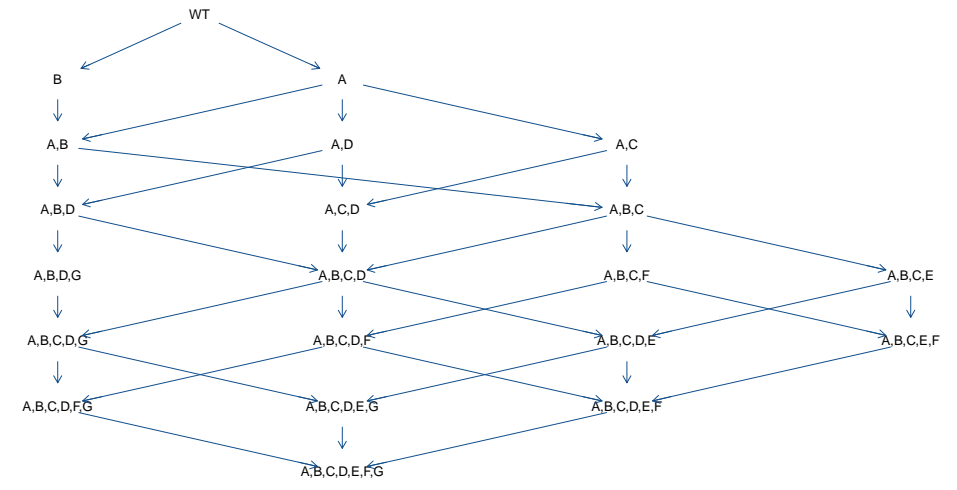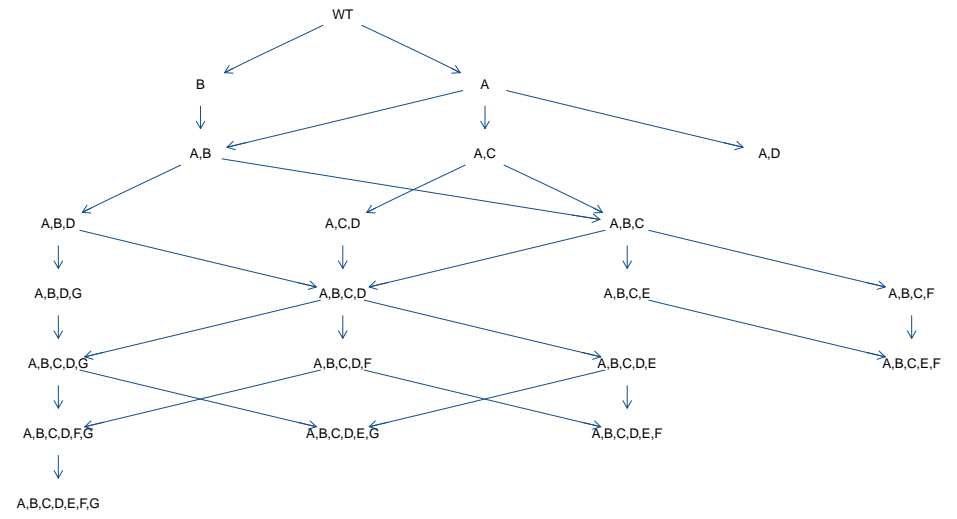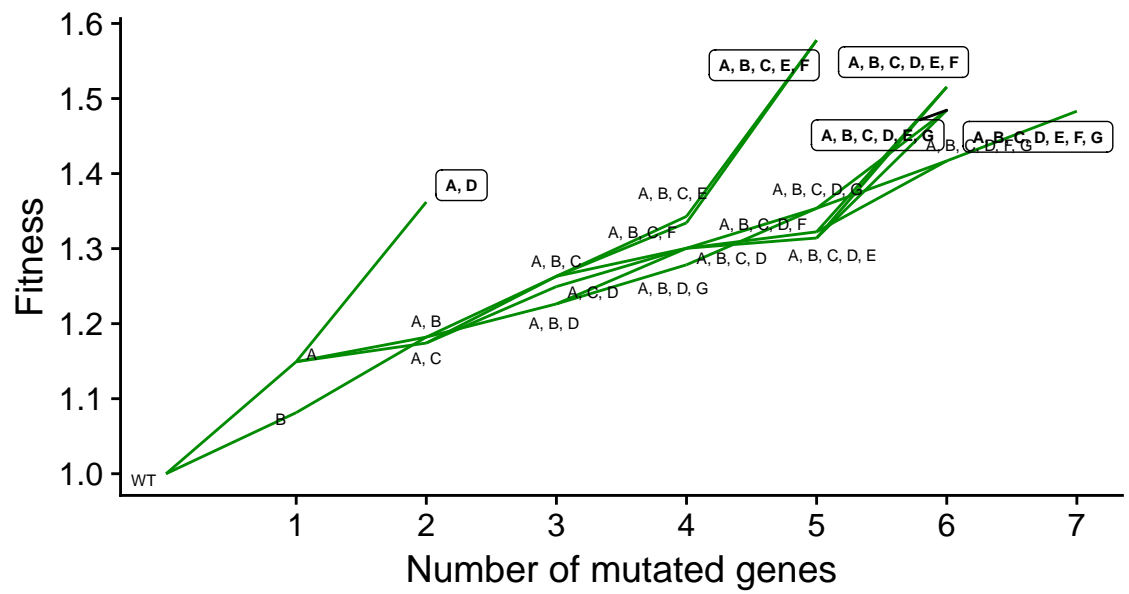

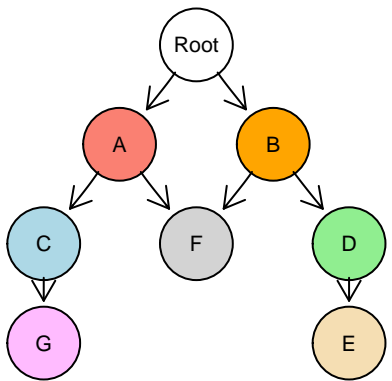

ID **HFe7qJ1sPtVbaUtG**  
 acc genotypes **25**  
 peaks no back **4**  
 removed edges **5**  
 prop rem edges **0.111**

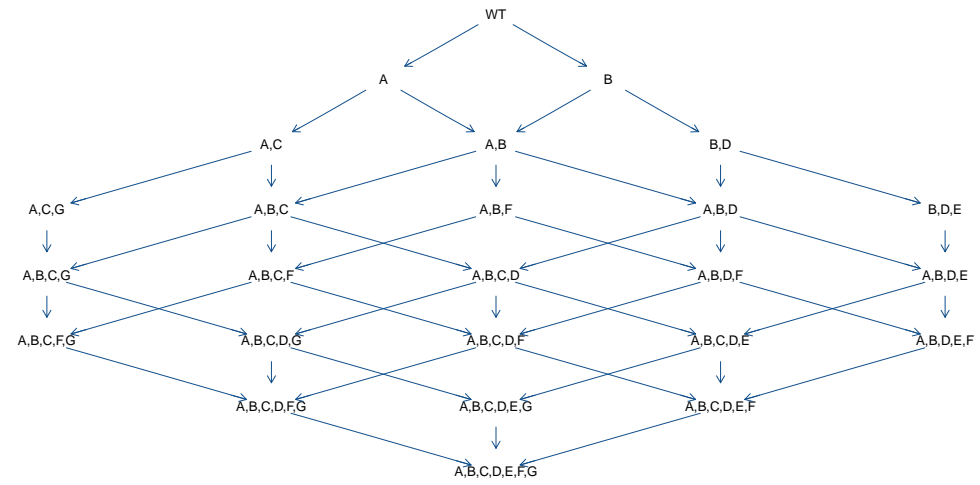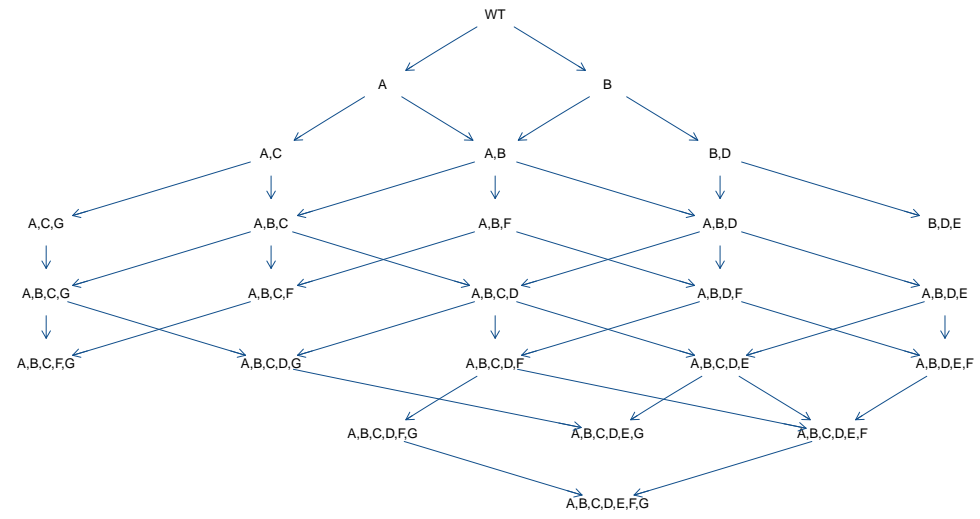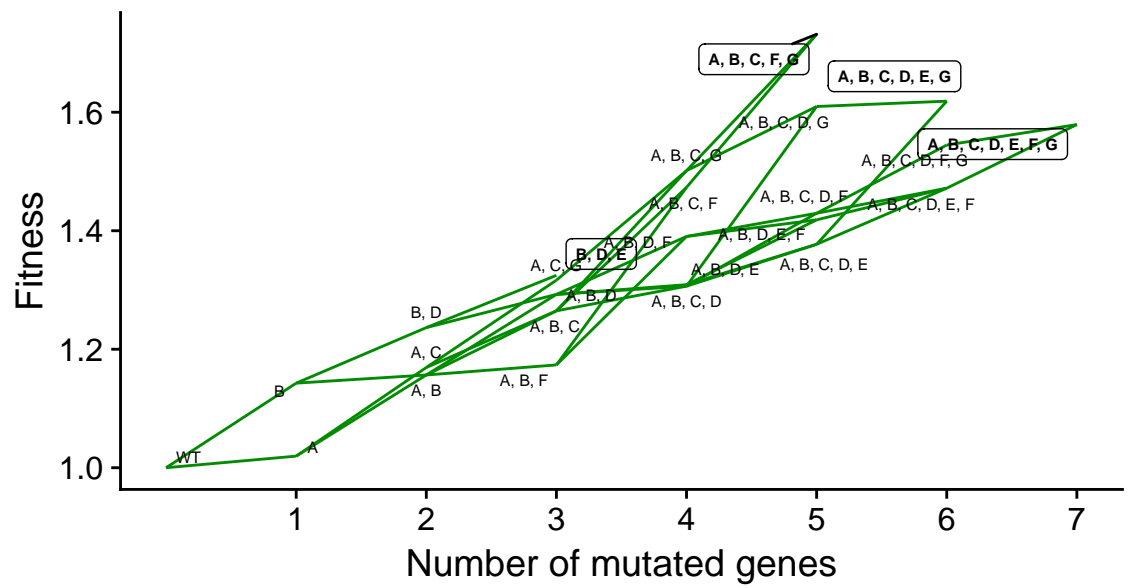



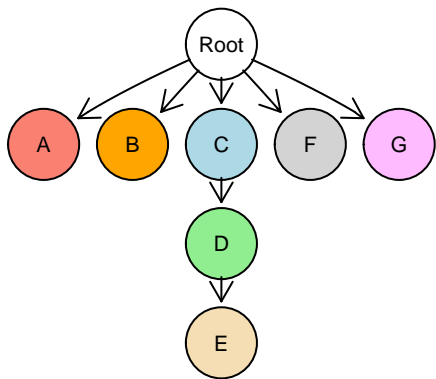

ID **hloXRsRm4d7aXmN4**  
 acc genotypes **64**  
 peaks no back **2**  
 removed edges **22**  
 prop rem edges **0.125**

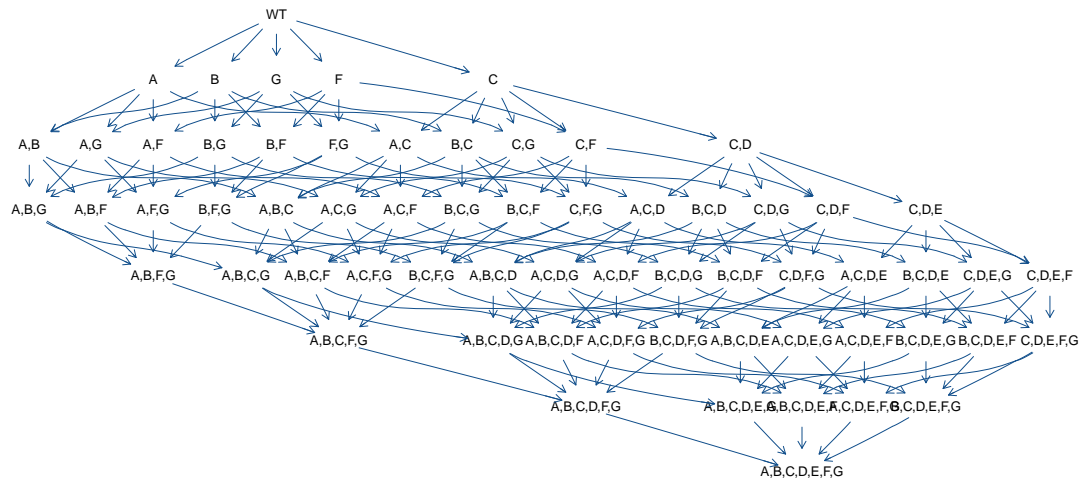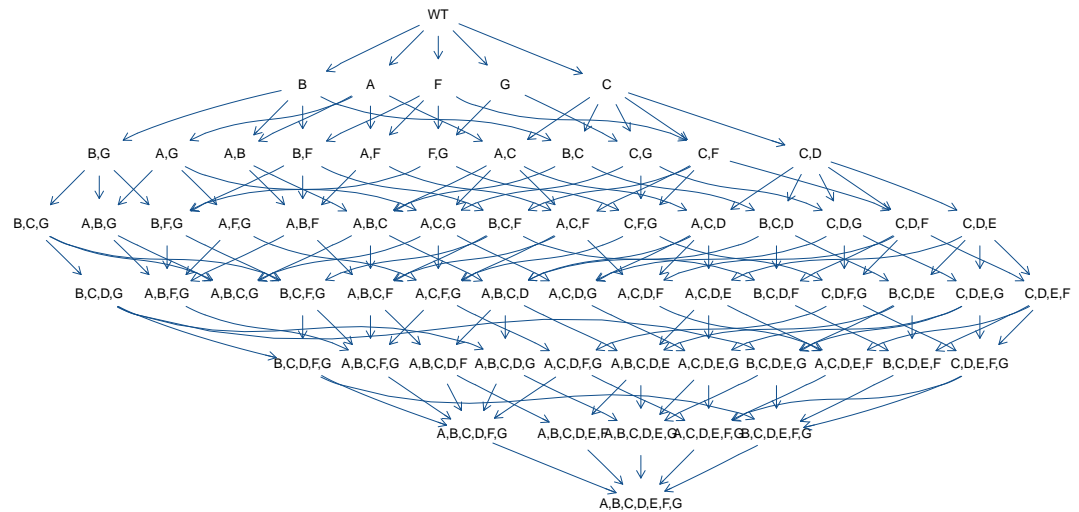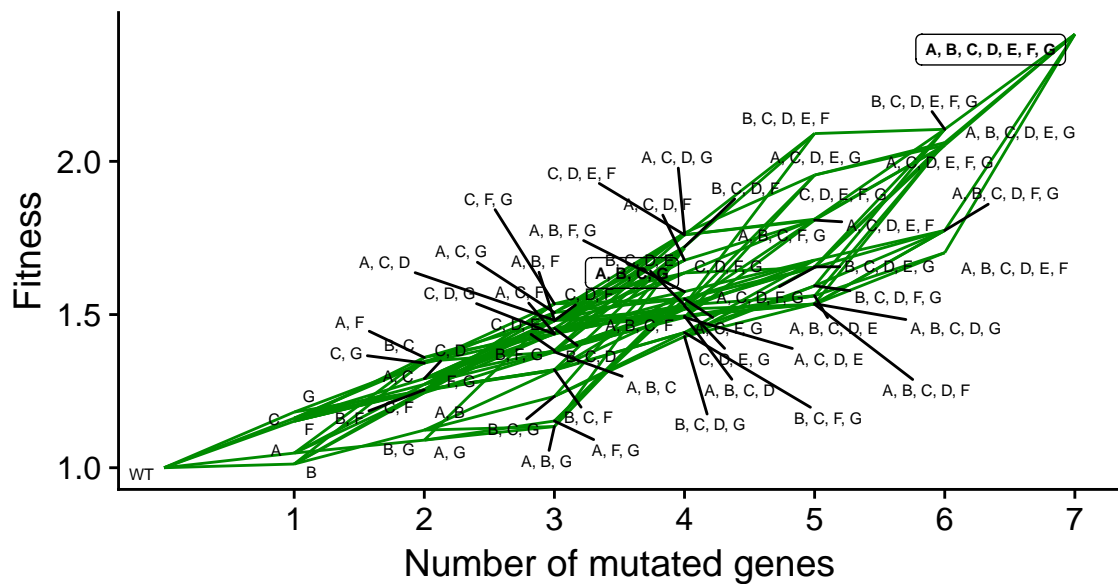

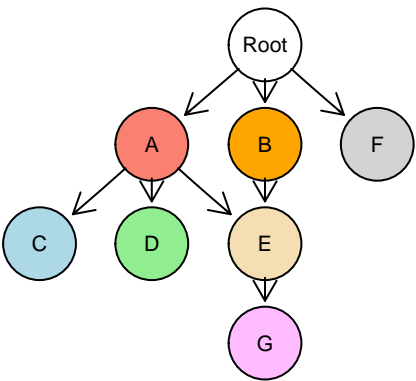

*ID* HizemNX910W6f2YLA  
*acc genotypes* 36  
*peaks no back* 5  
*removed edges* 12  
*prop rem edges* 0.15

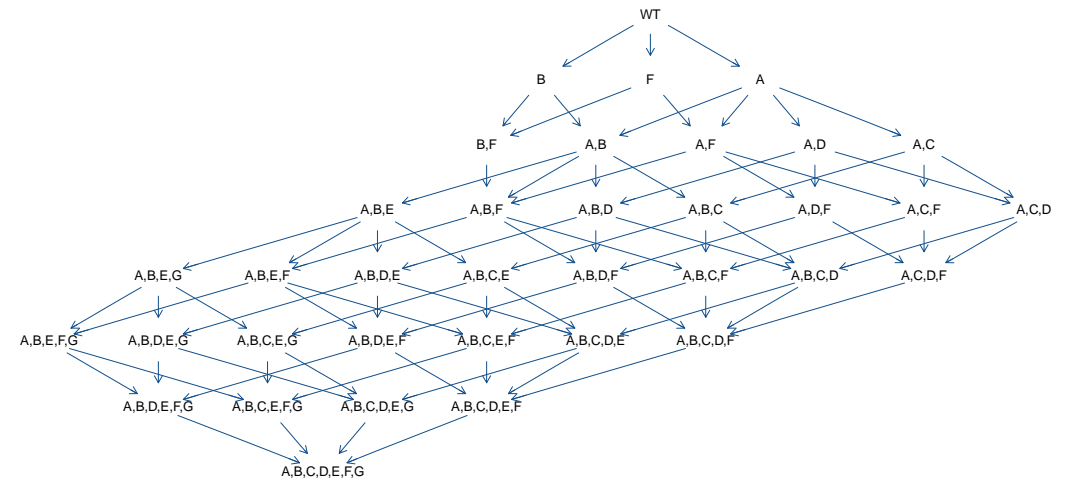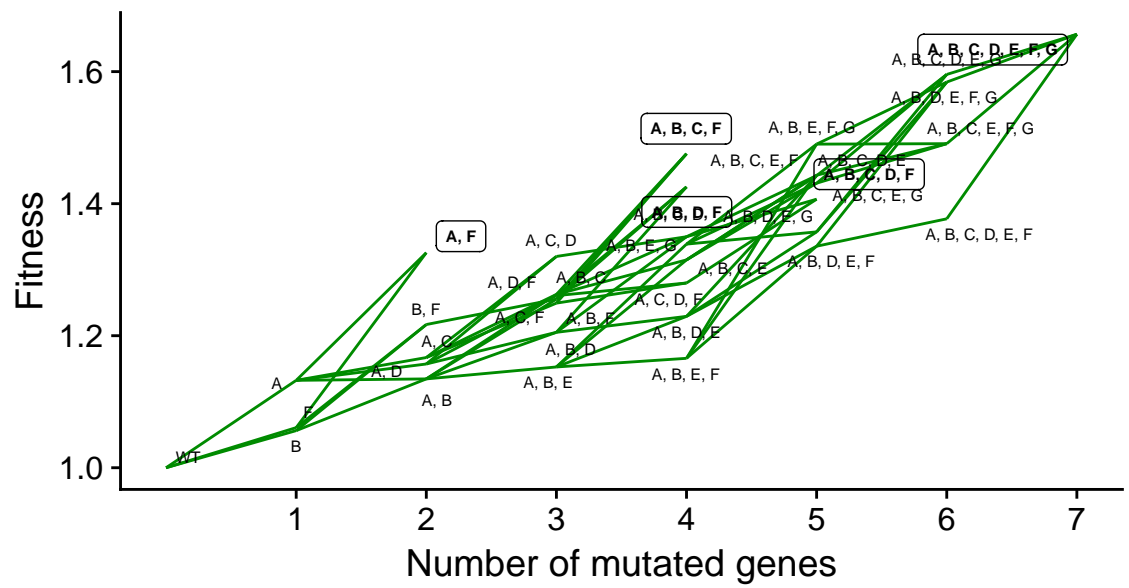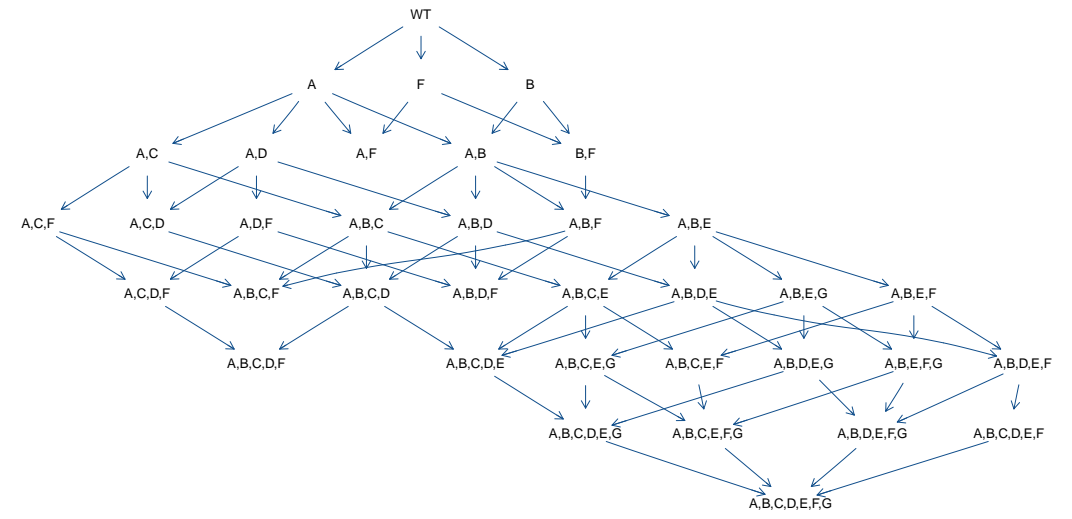

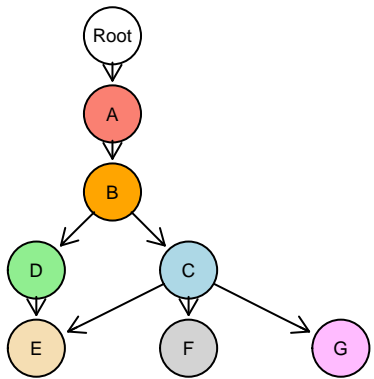

ID [hw8kQ4g44p4XAkDa](#)  
 acc genotypes 16  
 peaks no back 2  
 removed edges 3  
 prop rem edges 0.12

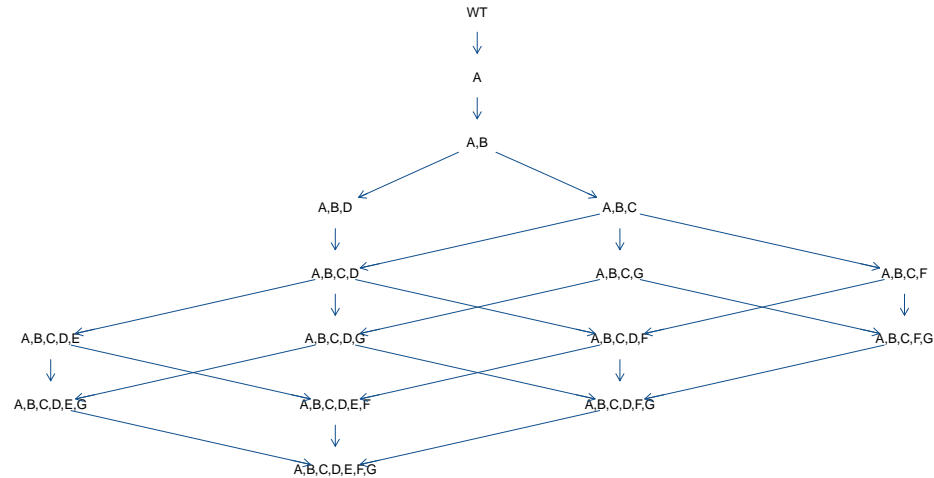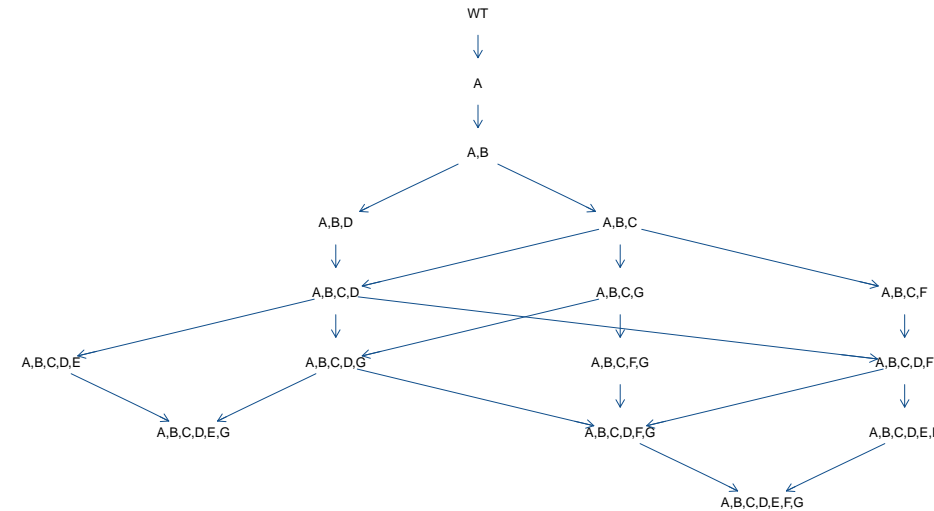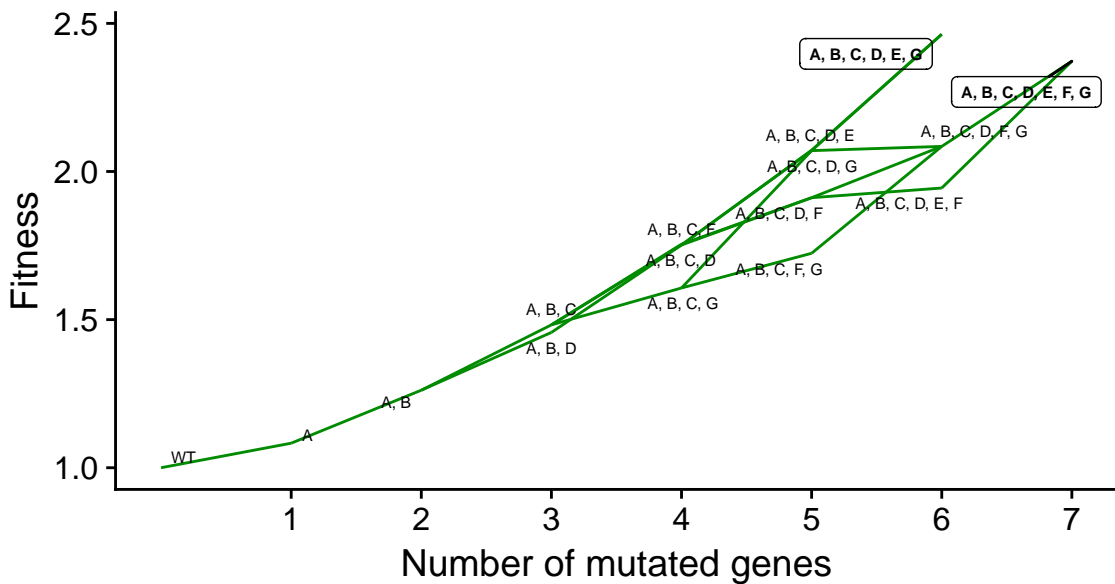

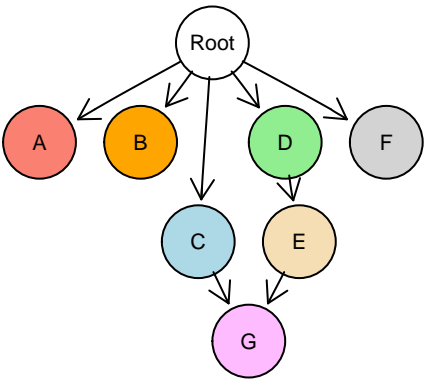

*ID* Hy5Py5ryXo10HeUYG  
*acc genotypes* 56  
*peaks no back* 8  
*removed edges* 35  
*prop rem edges* 0.236

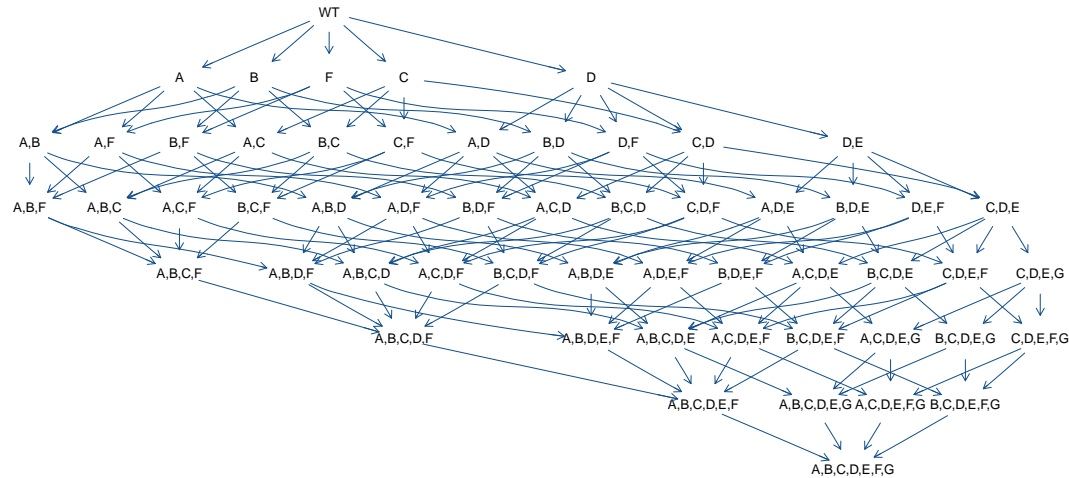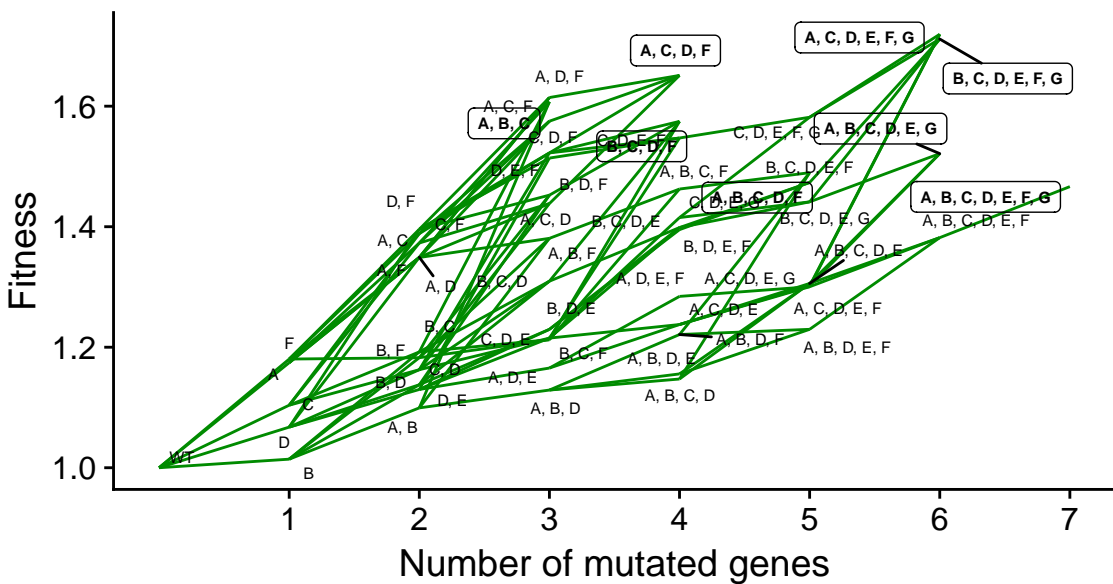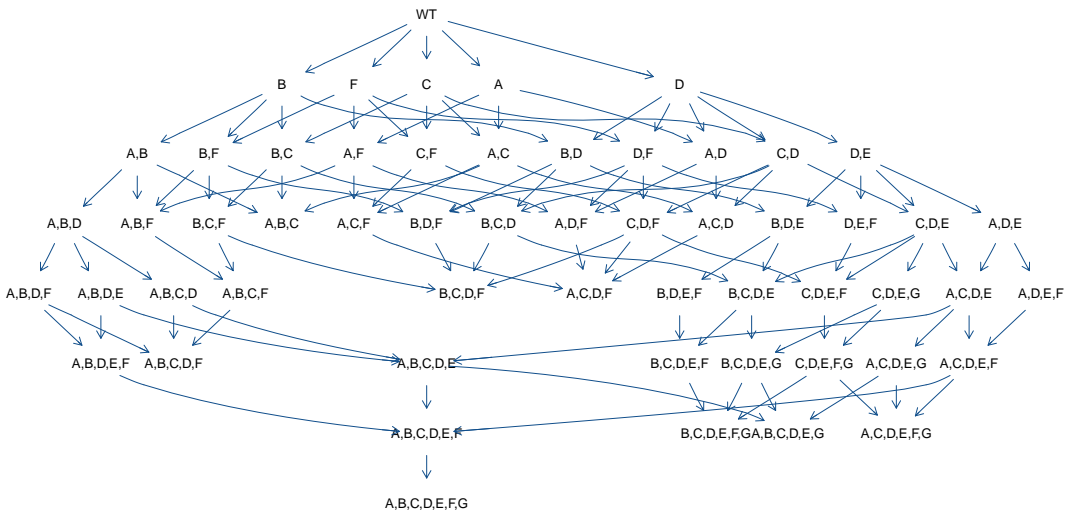

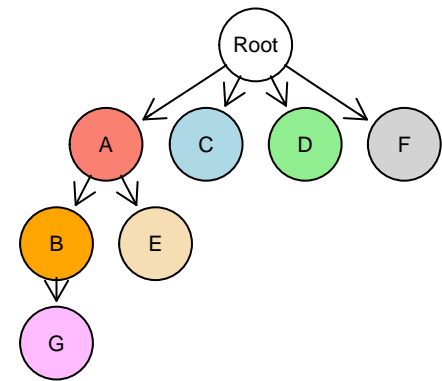

ID **ld85CzgL2g6AV3510**  
 acc genotypes **56**  
 peaks no back **9**  
 removed edges **38**  
 prop rem edges **0.257**

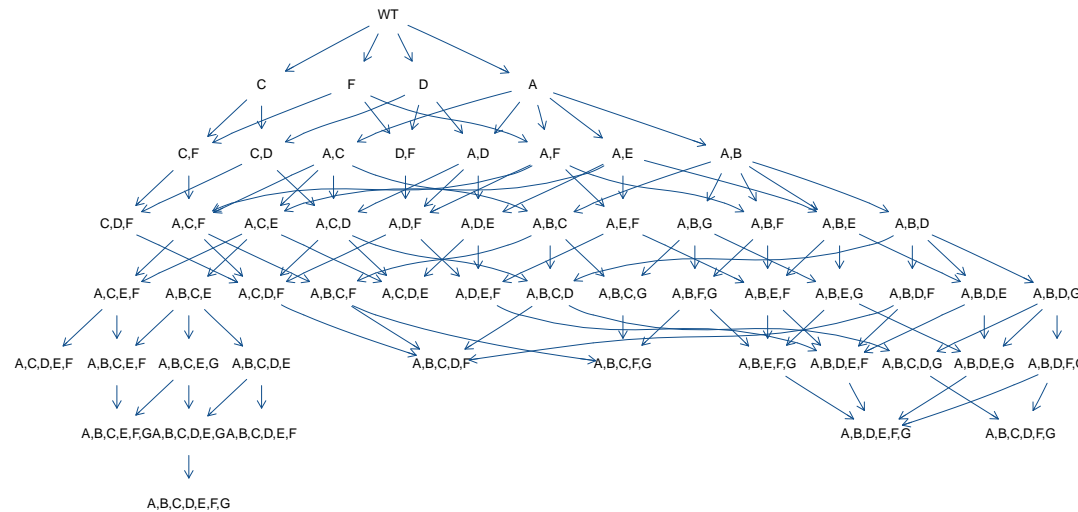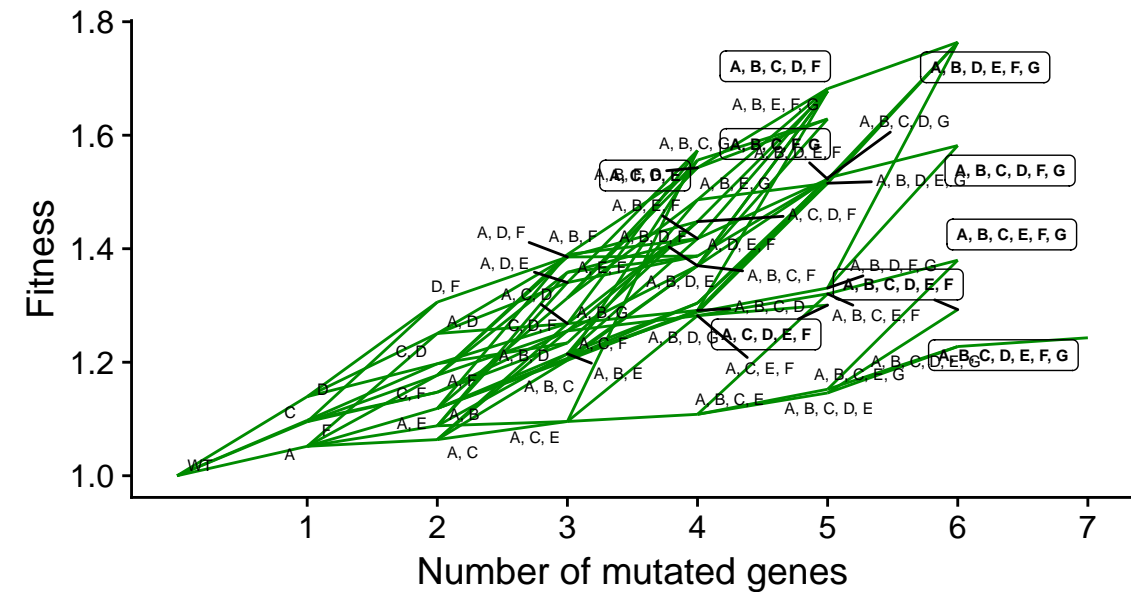

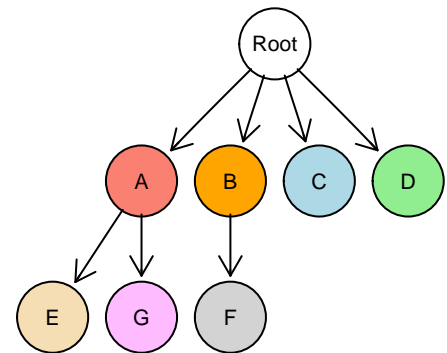

*ID* ILWtHZyJ9o3F1Qgp  
*acc genotypes* 60  
*peaks no back* 3  
*removed edges* 20  
*prop rem edges* 0.125

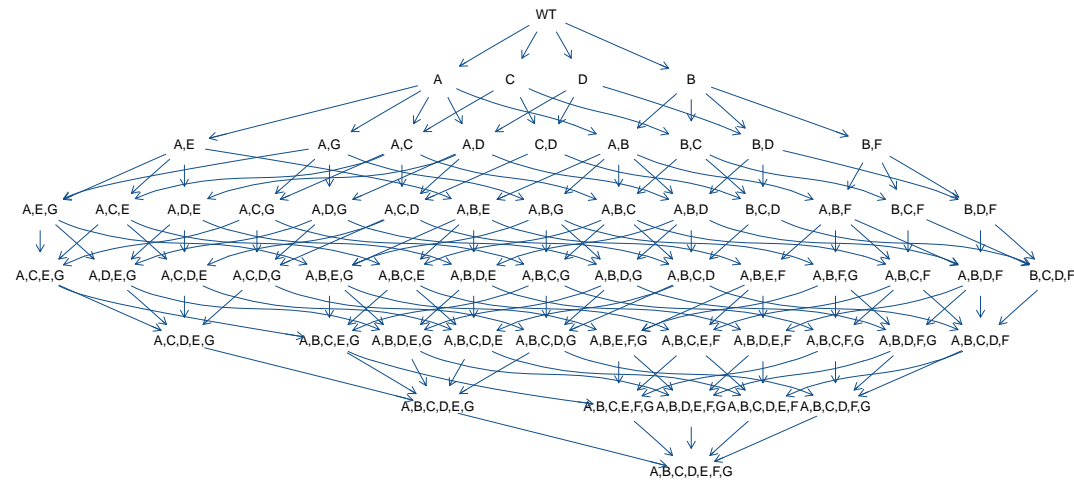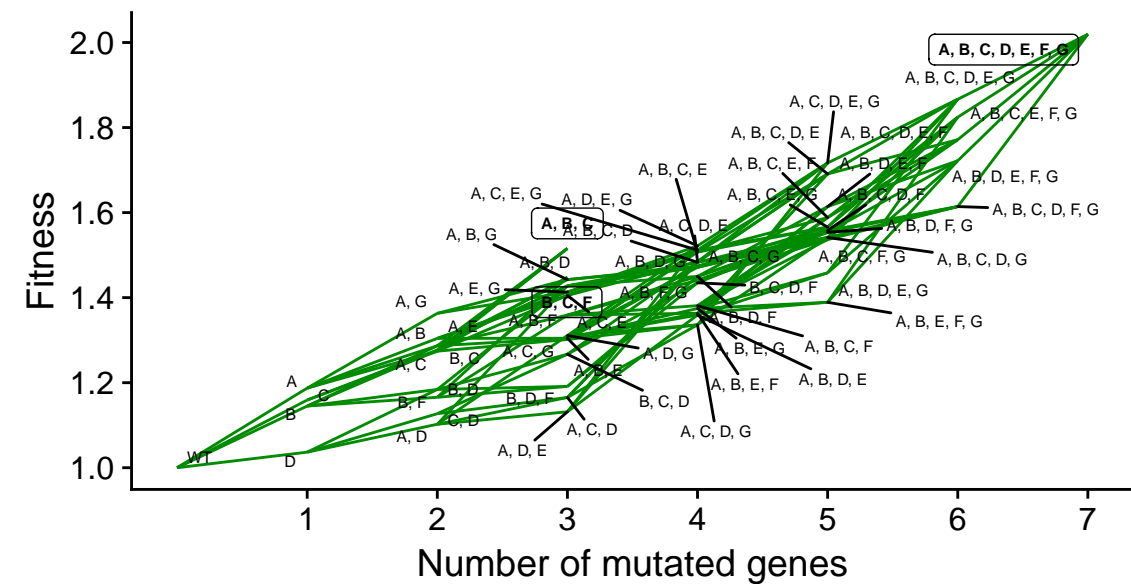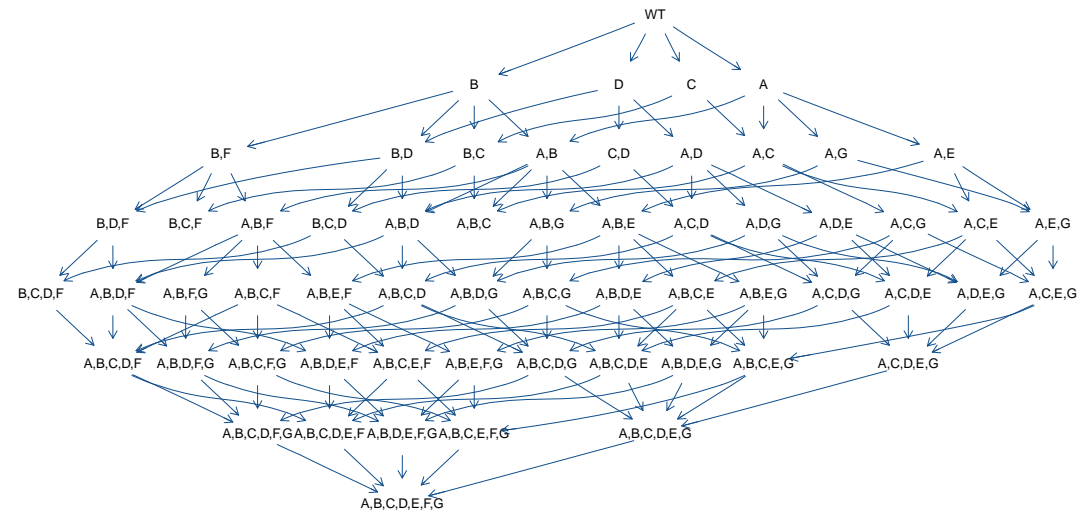



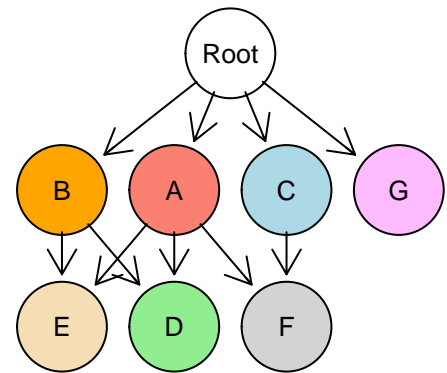

ID **jFHaUyfw10mPN2R1P**  
 acc genotypes **38**  
 peaks no back **4**  
 removed edges **15**  
 prop rem edges **0.176**

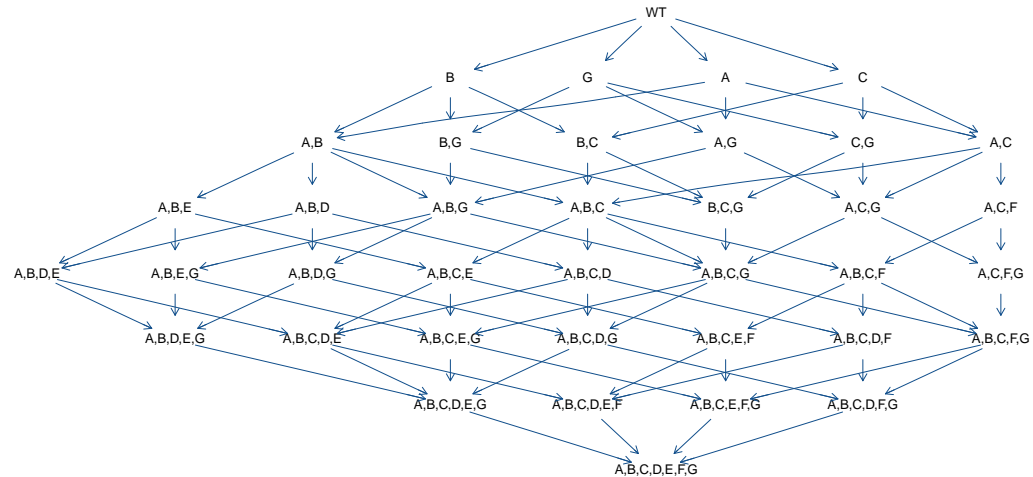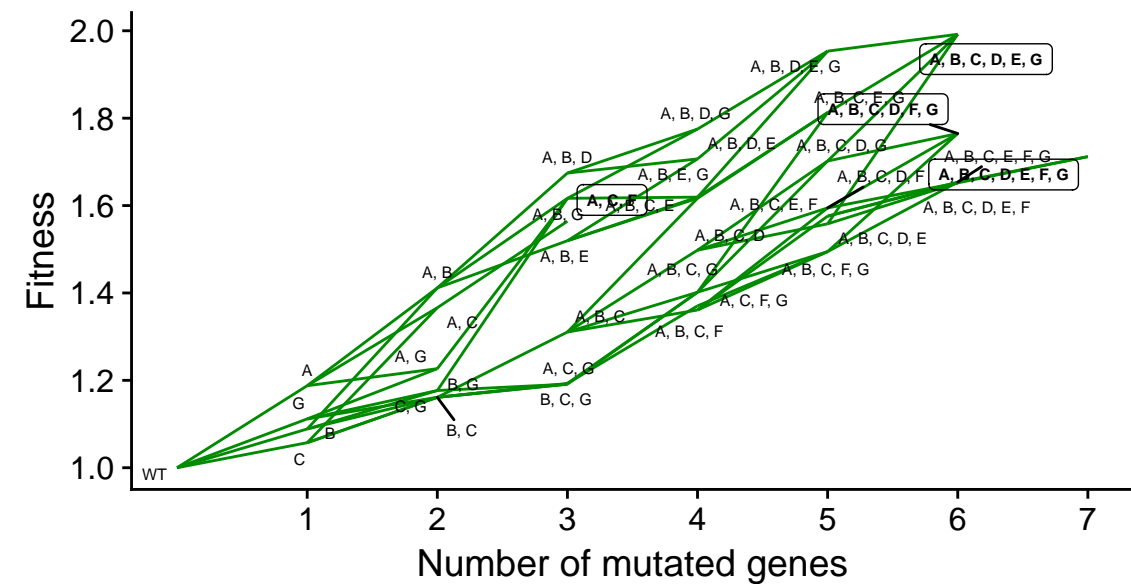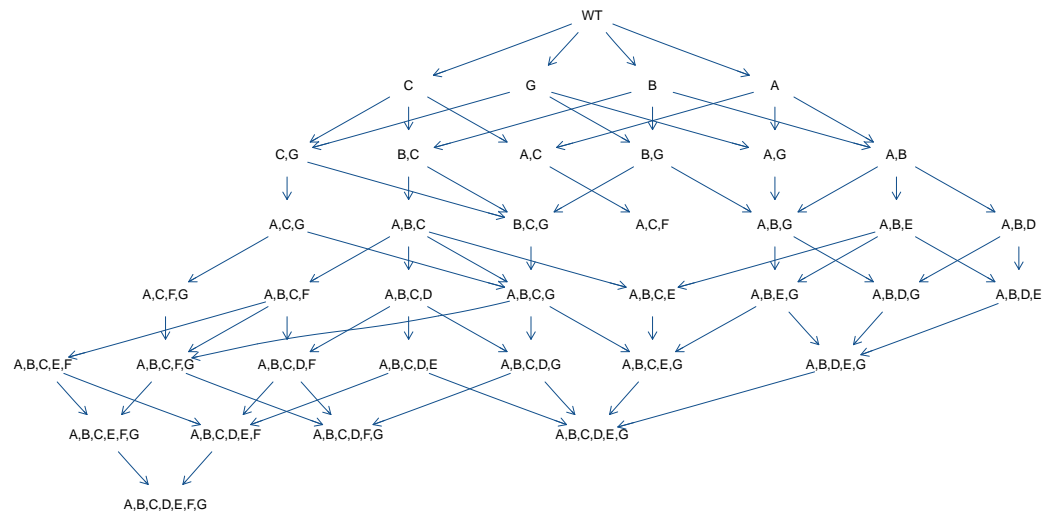



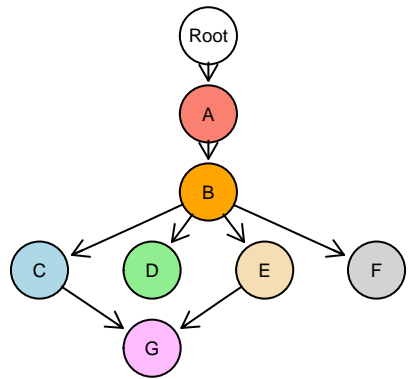

ID jj397ue810e35pKQe  
 acc genotypes 22  
 peaks no back 3  
 removed edges 5  
 prop rem edges 0.119

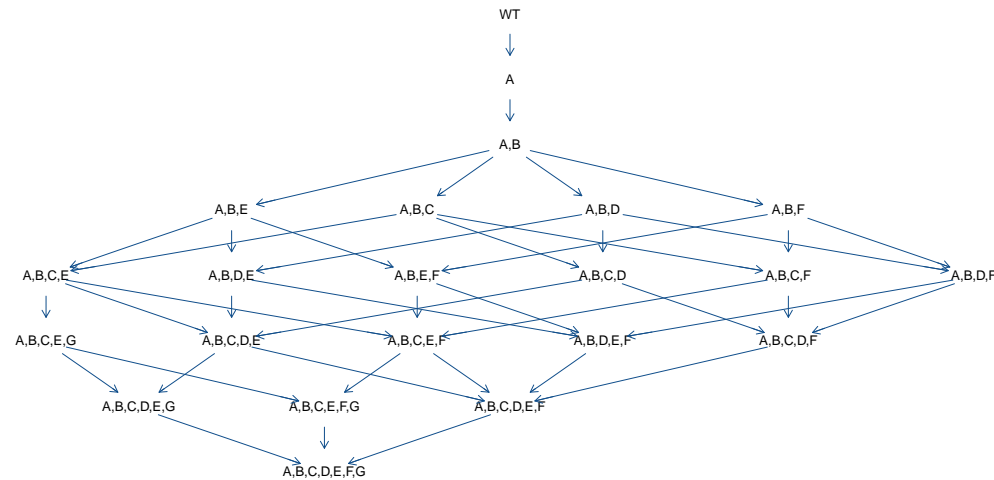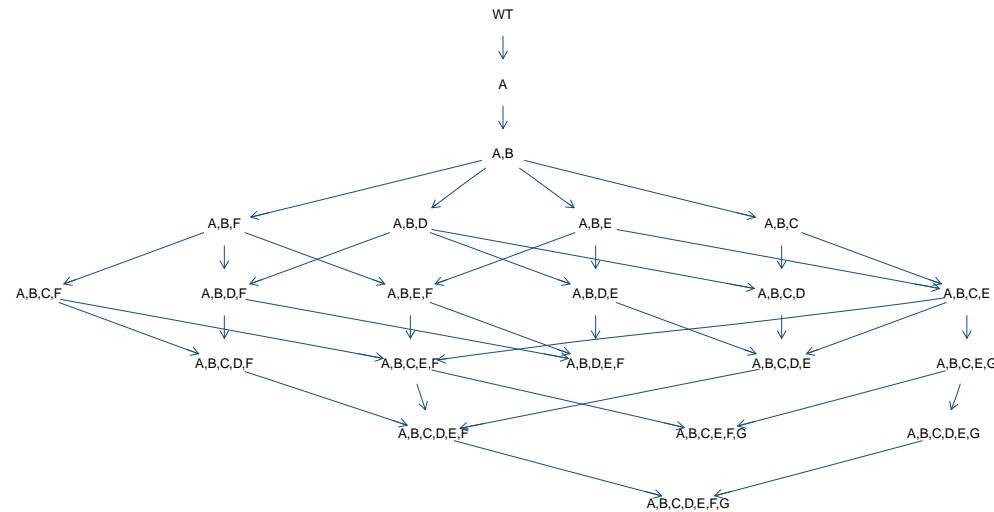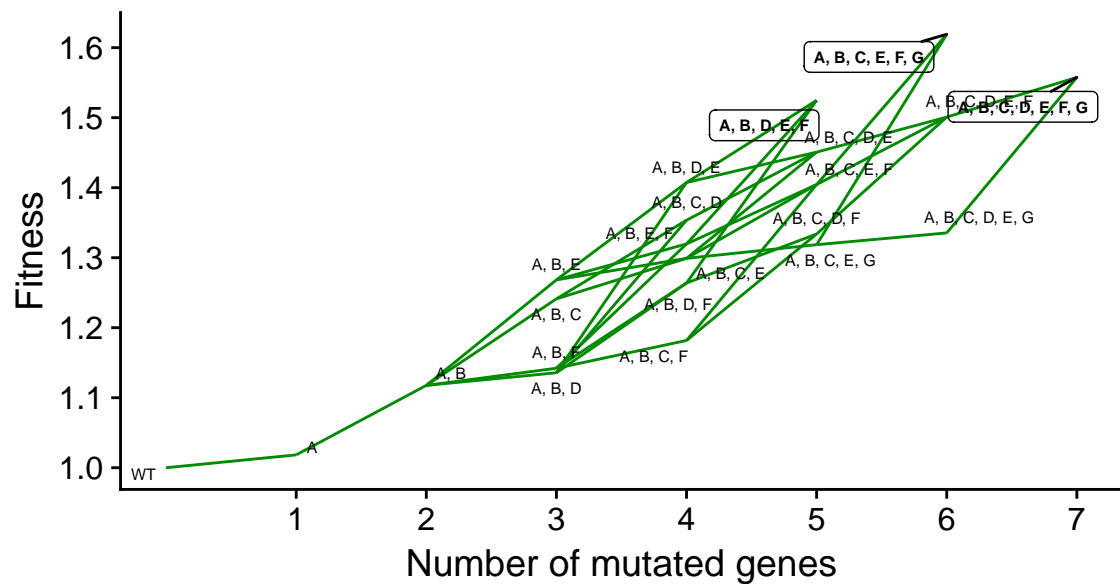



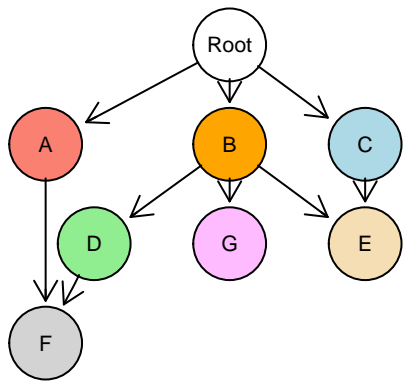

ID jXkcll8ifcrBbl2U  
 acc genotypes 34  
 peaks no back 2  
 removed edges 4  
 prop rem edges 0.055

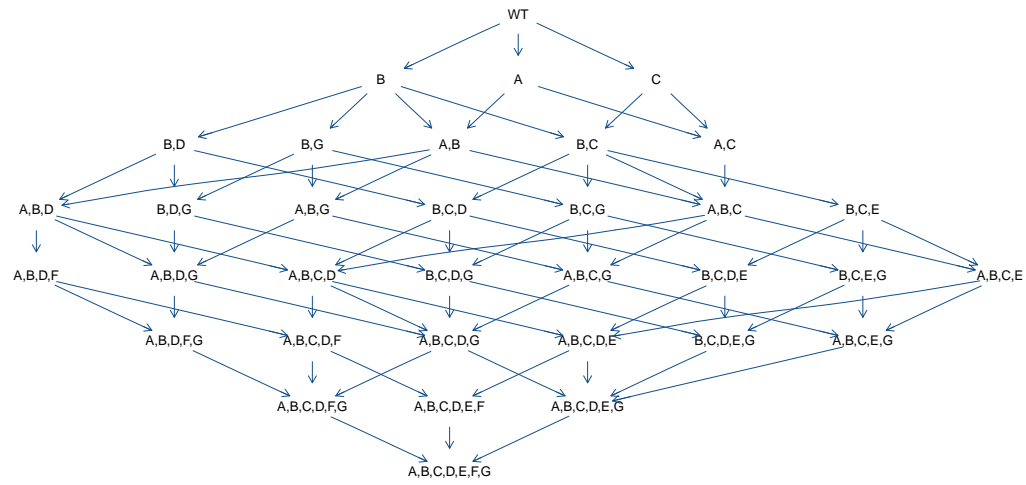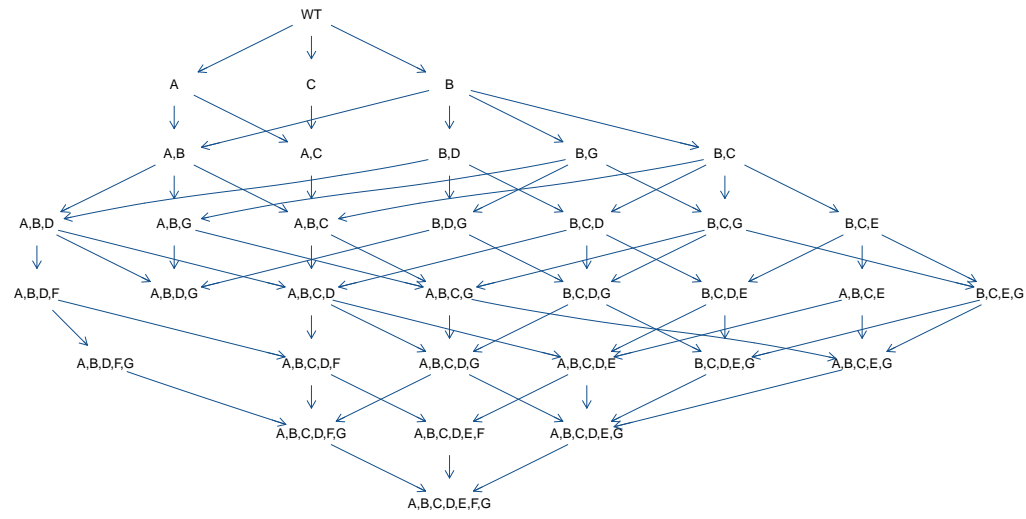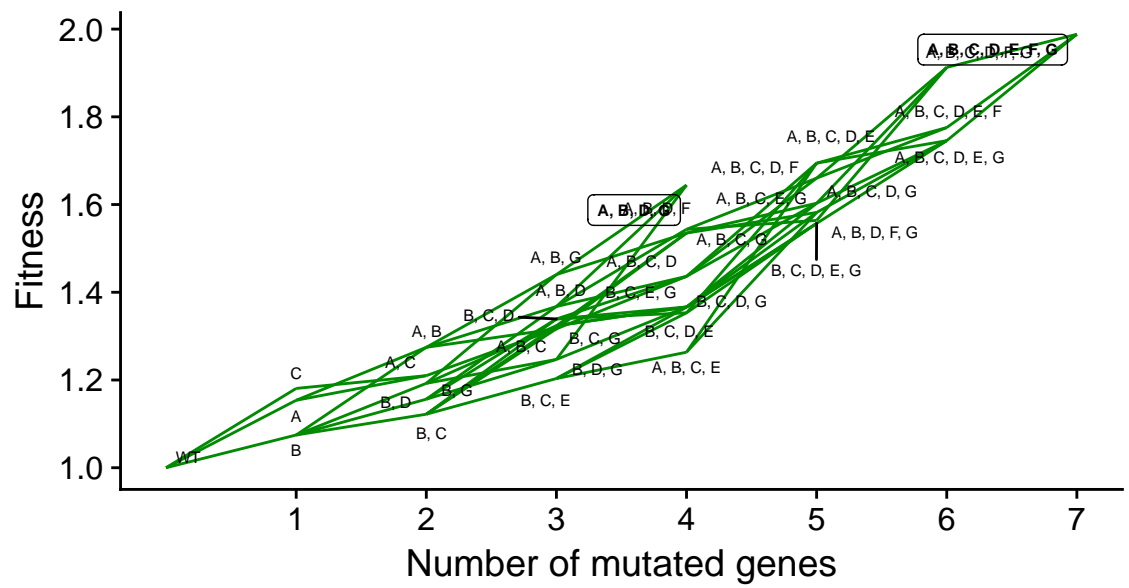



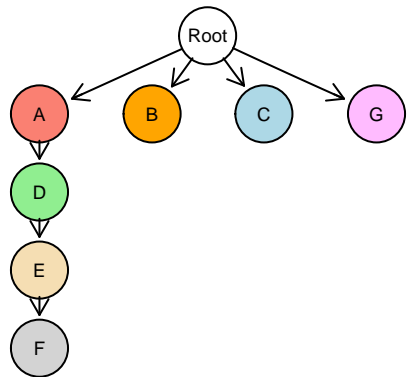

ID **k58HtWC5MFWCpF19**  
 acc genotypes **40**  
 peaks no back **7**  
 removed edges **12**  
 prop rem edges **0.13**

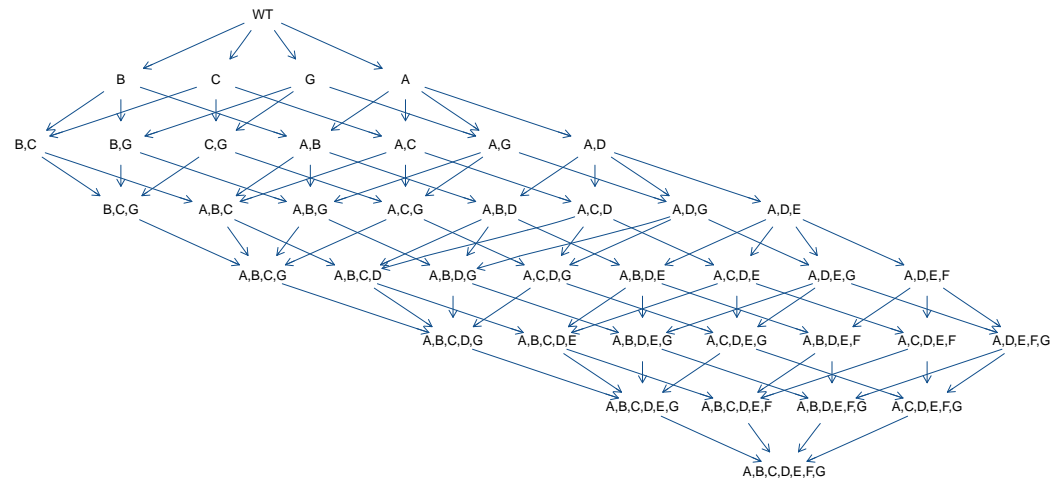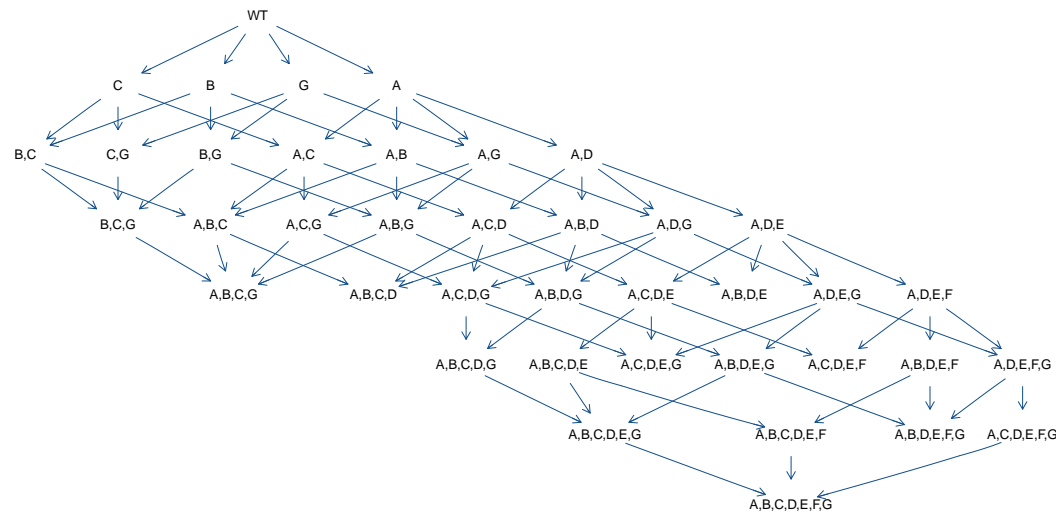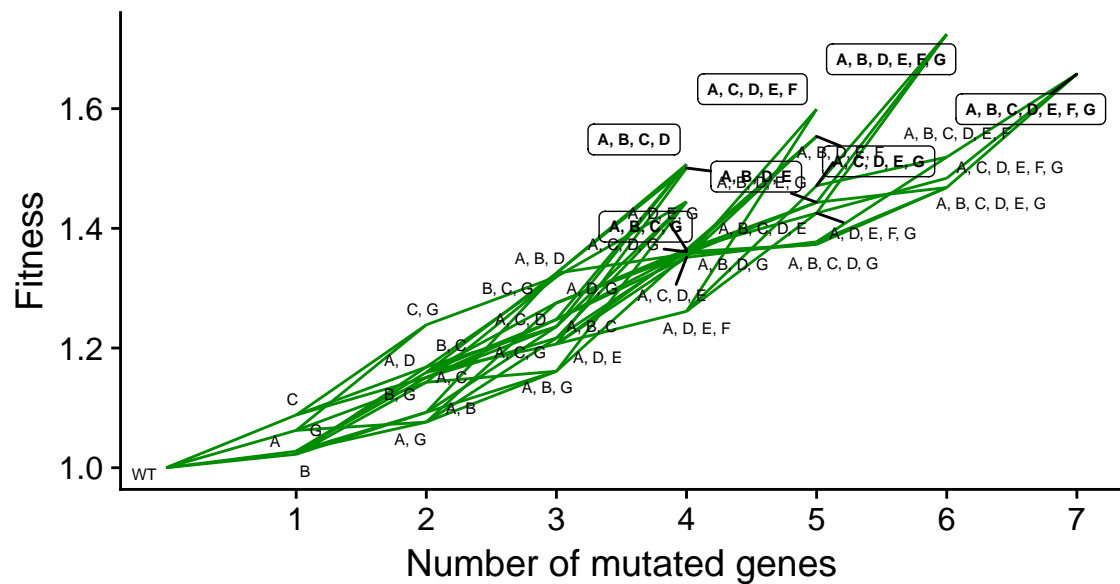



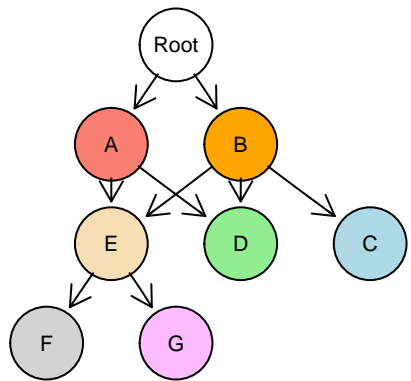

ID **kj6bITZoZLt3OYX2**  
 acc genotypes **24**  
 peaks no back **5**  
 removed edges **8**  
 prop rem edges **0.174**

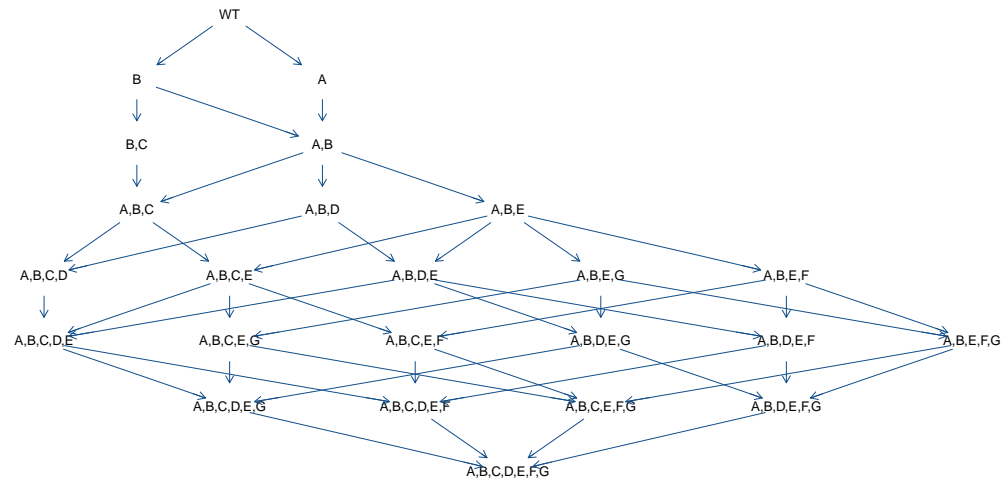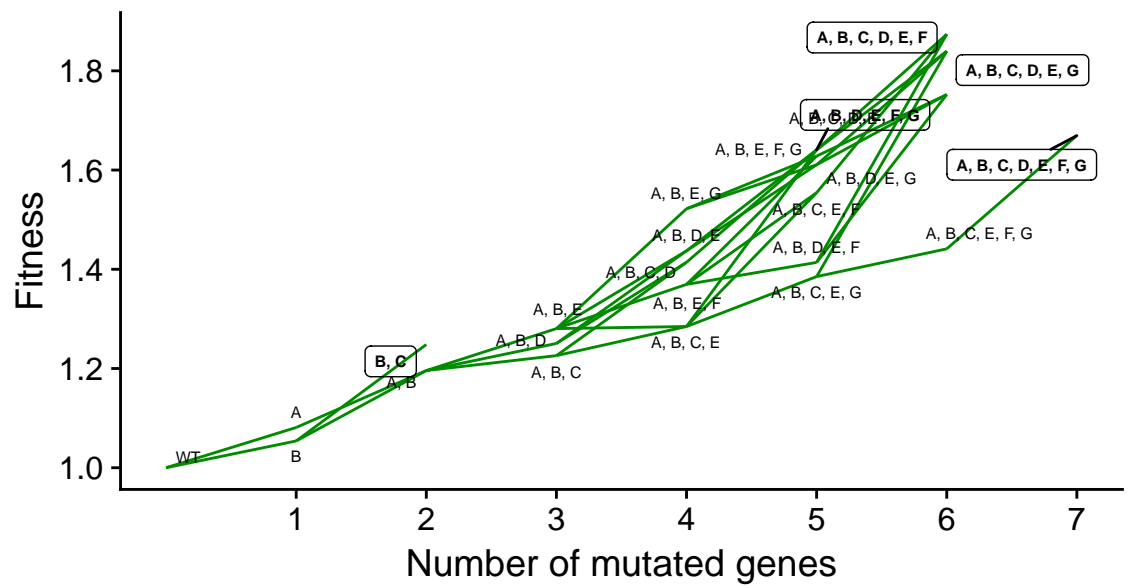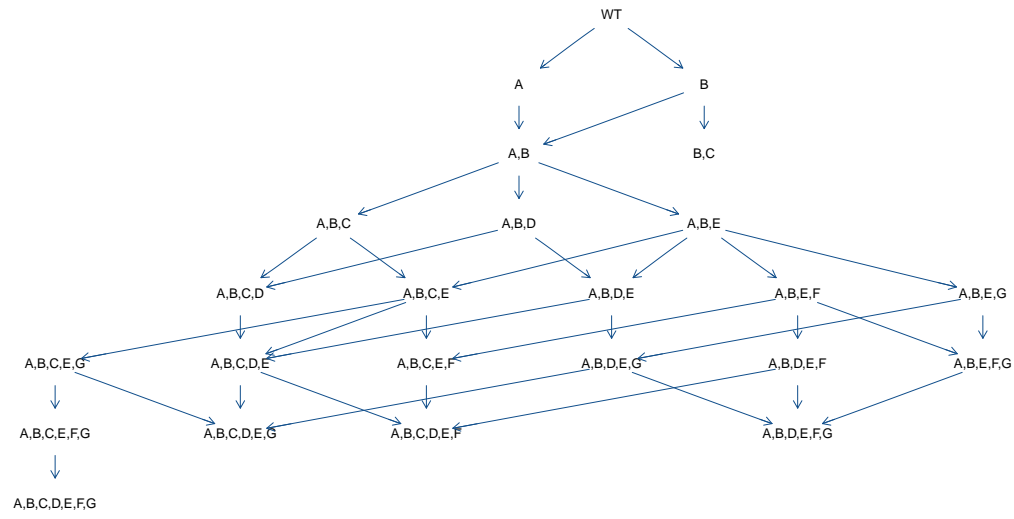

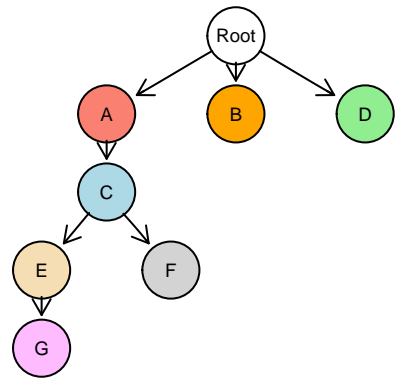

*ID* L8C8OoielFLvU98x  
*acc genotypes* 32  
*peaks no back* 7  
*removed edges* 17  
*prop rem edges* 0.25

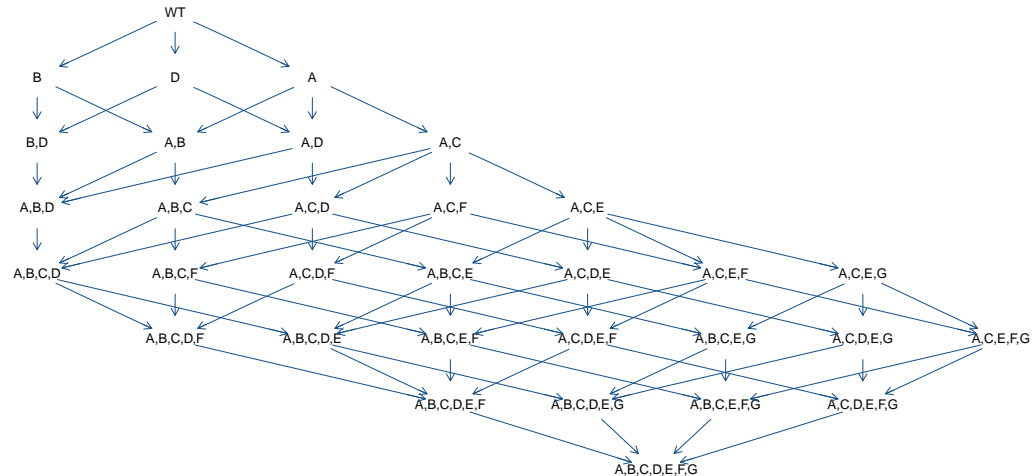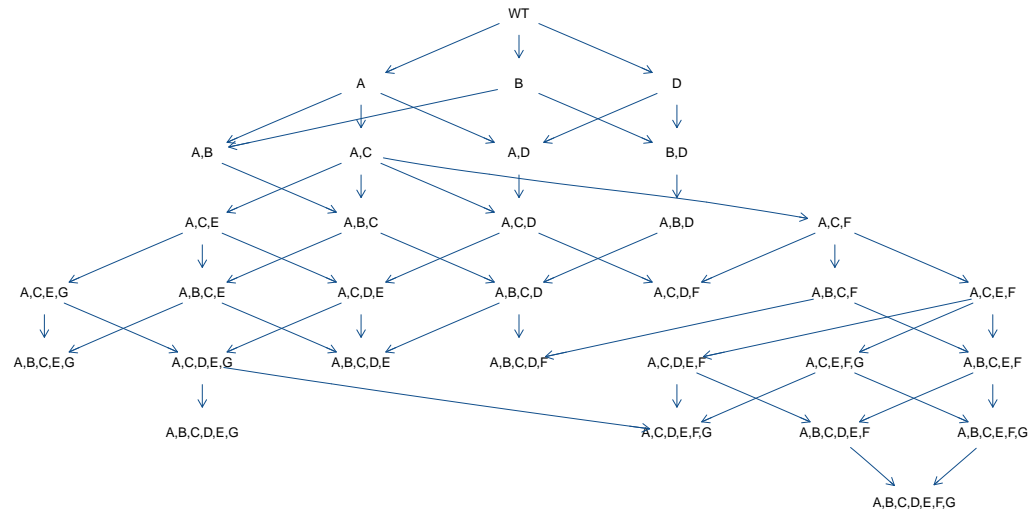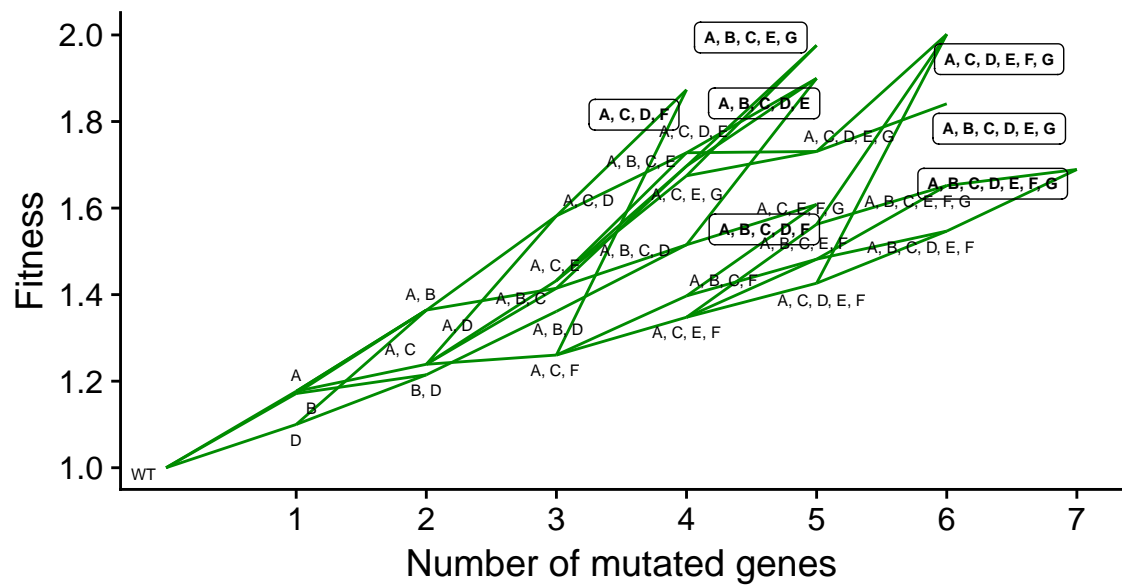



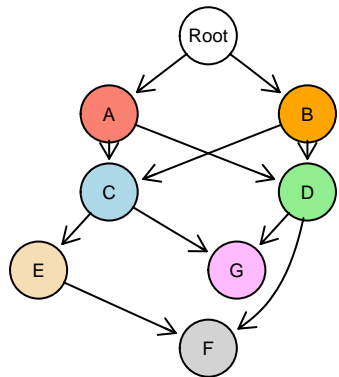

ID L9U6EXaxa4AgbWdQ  
 acc genotypes 13  
 peaks no back 3  
 removed edges 2  
 prop rem edges 0.118

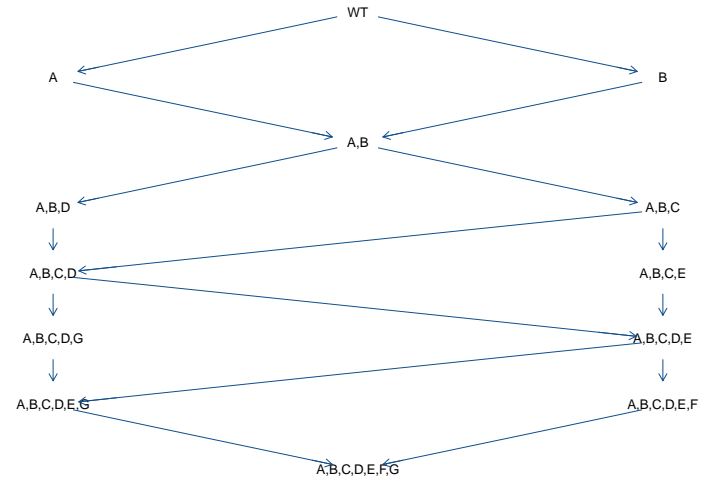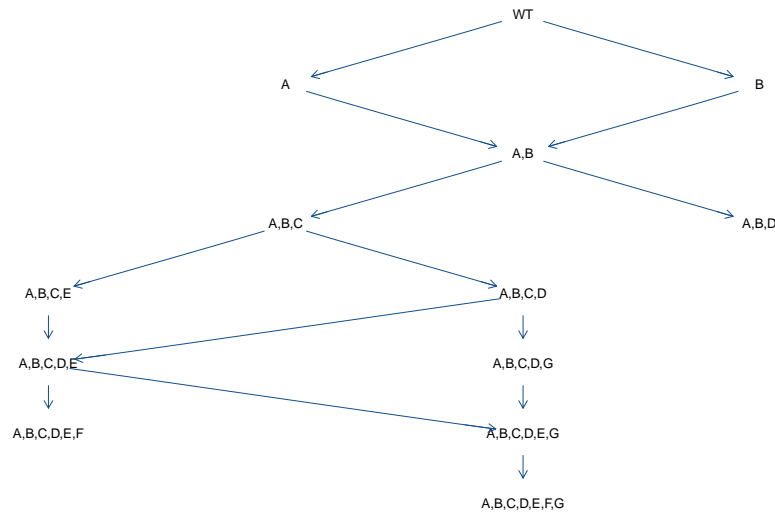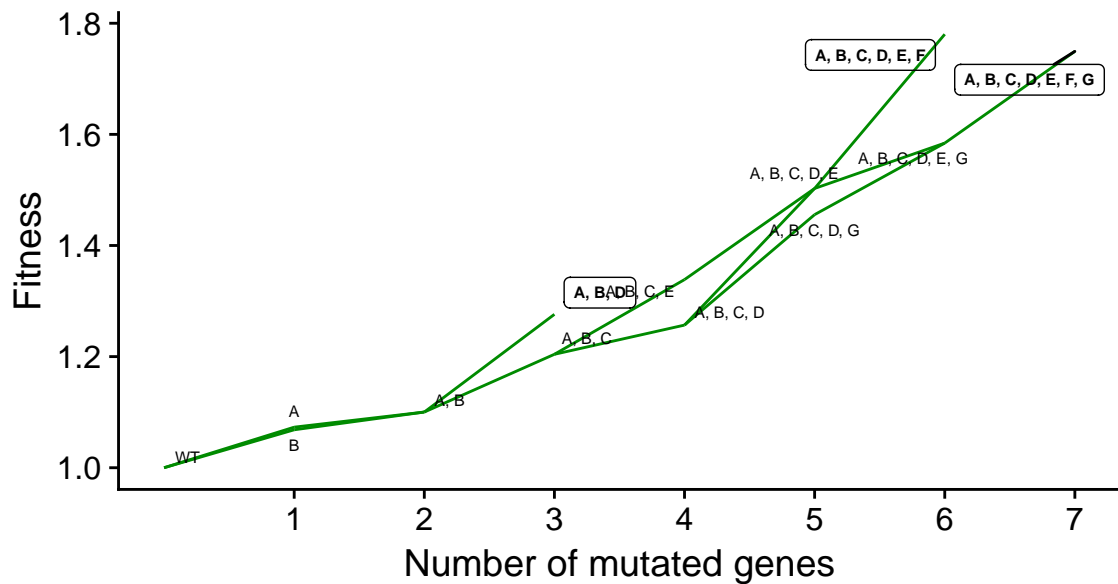

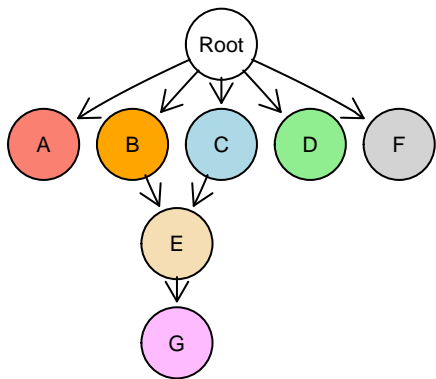

*ID* **IDsDxkW7aWMDoTYv**  
*acc genotypes* **48**  
*peaks no back* **8**  
*removed edges* **27**  
*prop rem edges* **0.225**

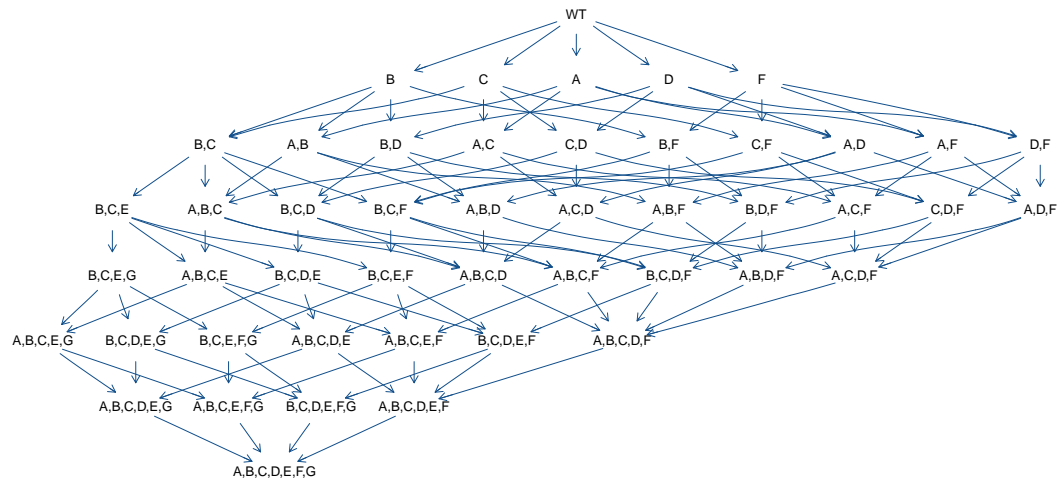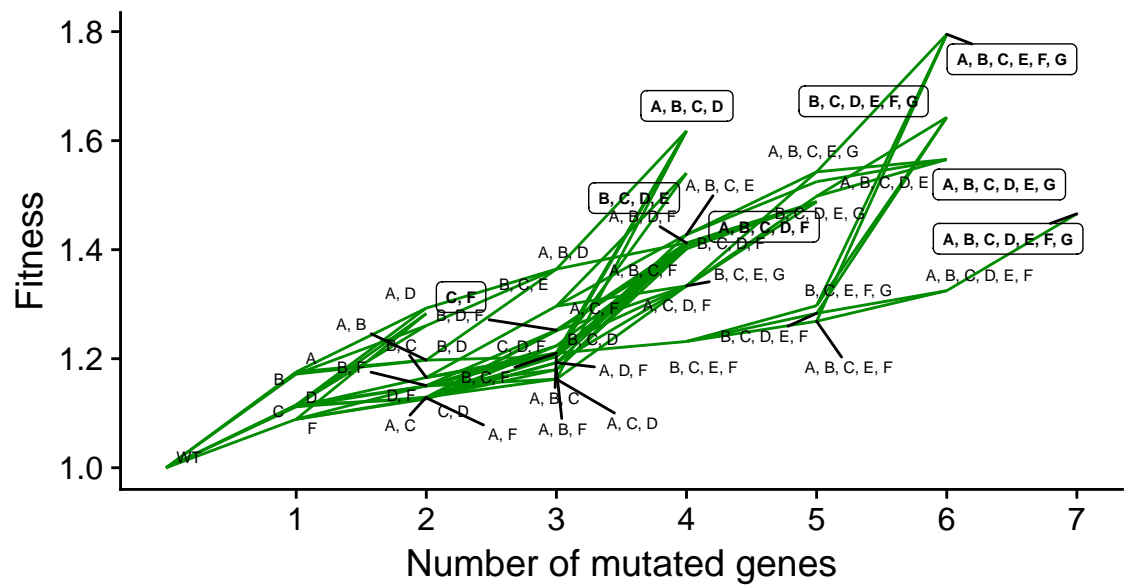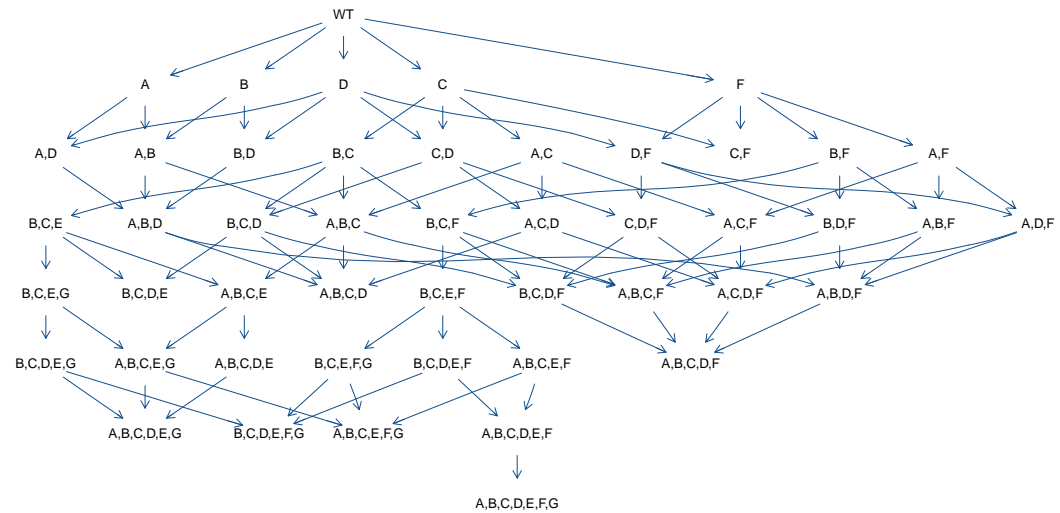

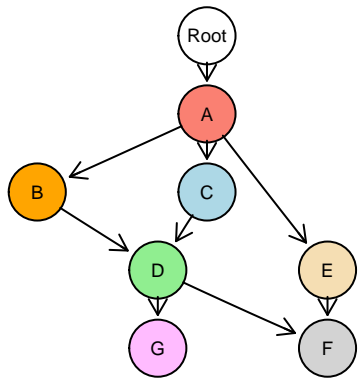

ID Lh10CtFMPrzzV6ihq  
 acc genotypes 15  
 peaks no back 2  
 removed edges 1  
 prop rem edges 0.045

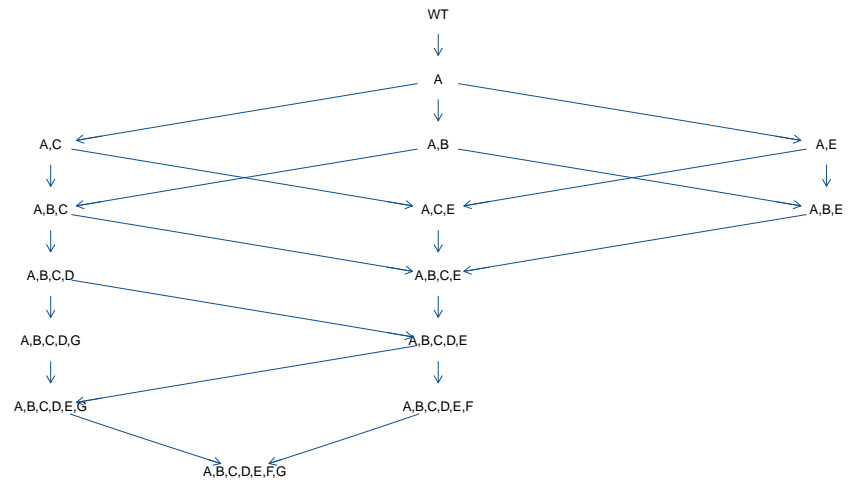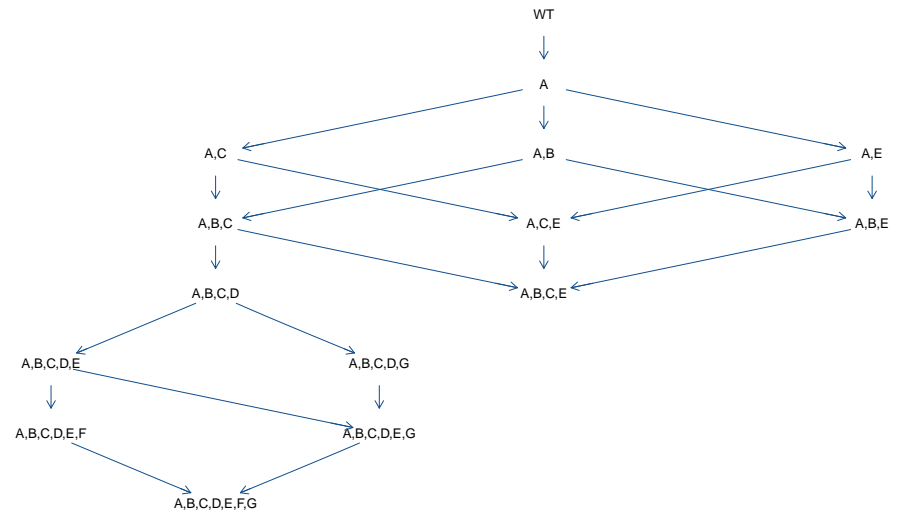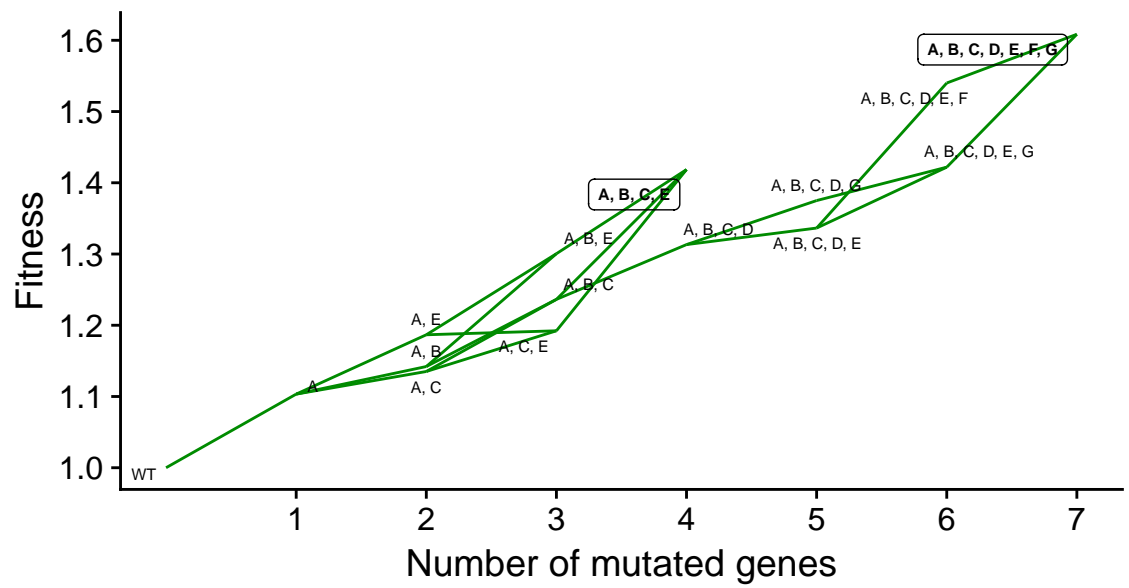

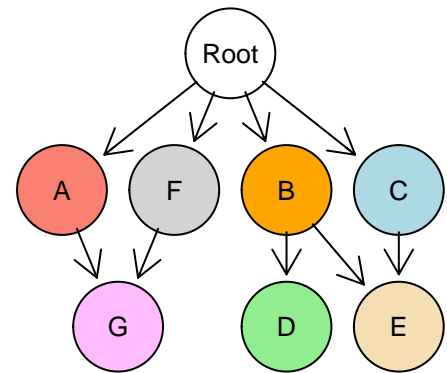

ID **LqqKBG79CNzADijg**  
 acc genotypes **40**  
 peaks no back **6**  
 removed edges **14**  
 prop rem edges **0.156**

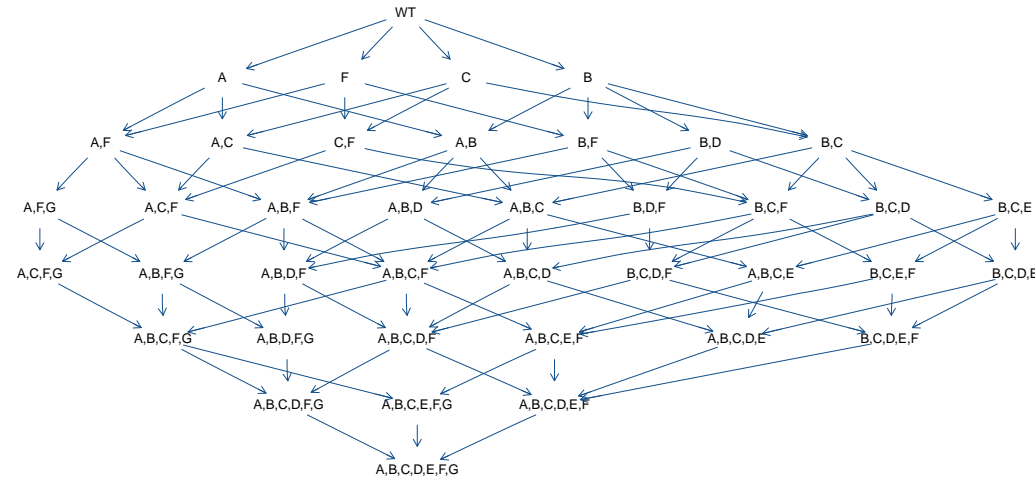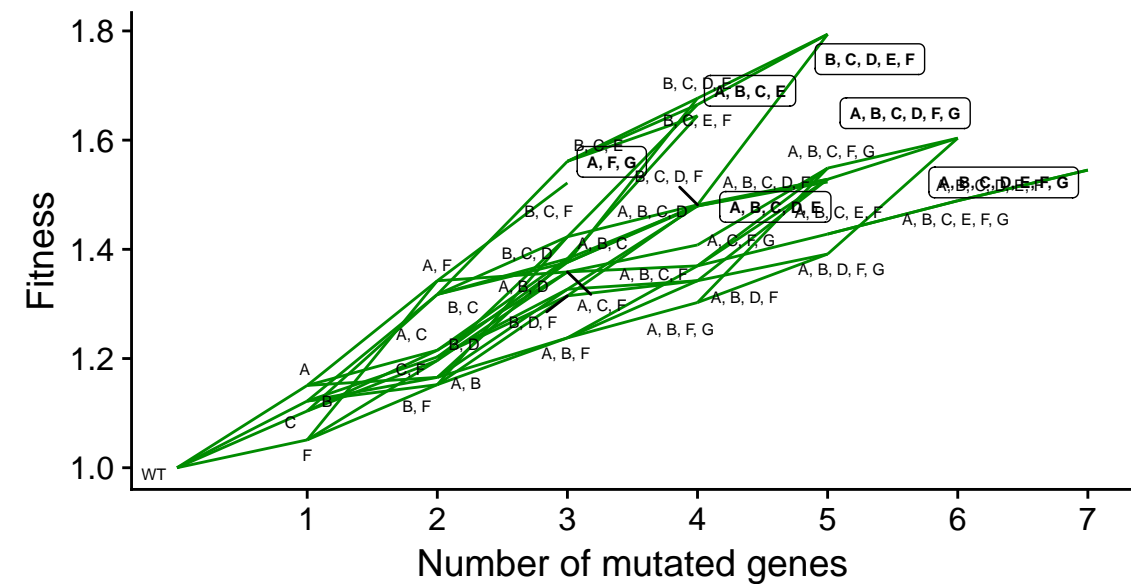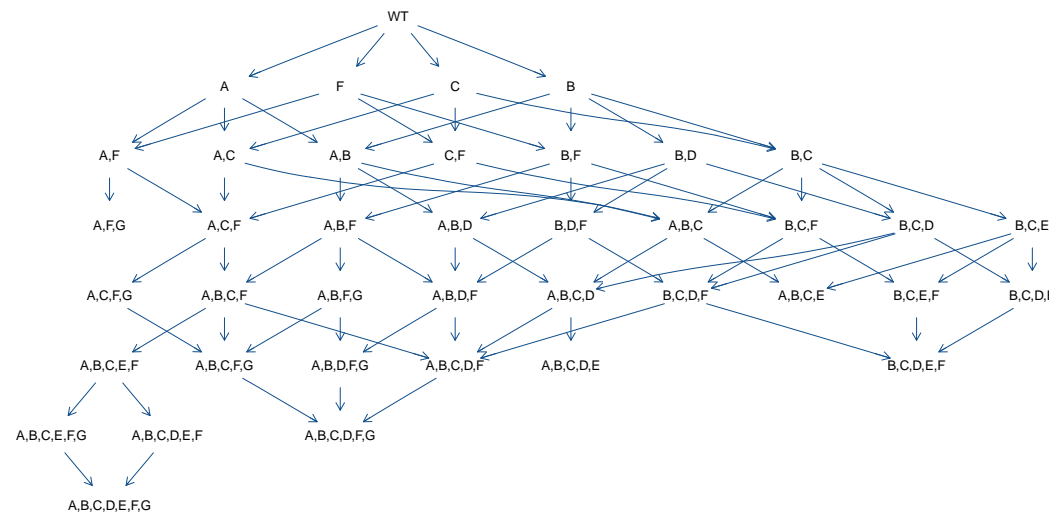

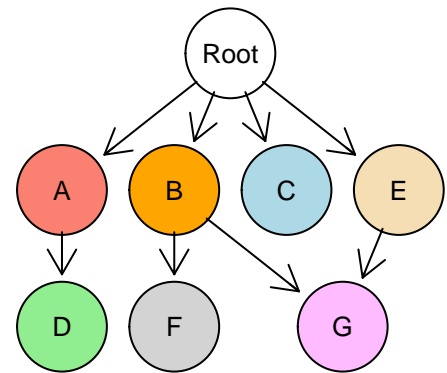

ID **IsG2NZmtk5W2NxDs**  
 acc genotypes **48**  
 peaks no back **7**  
 removed edges **17**  
 prop rem edges **0.147**

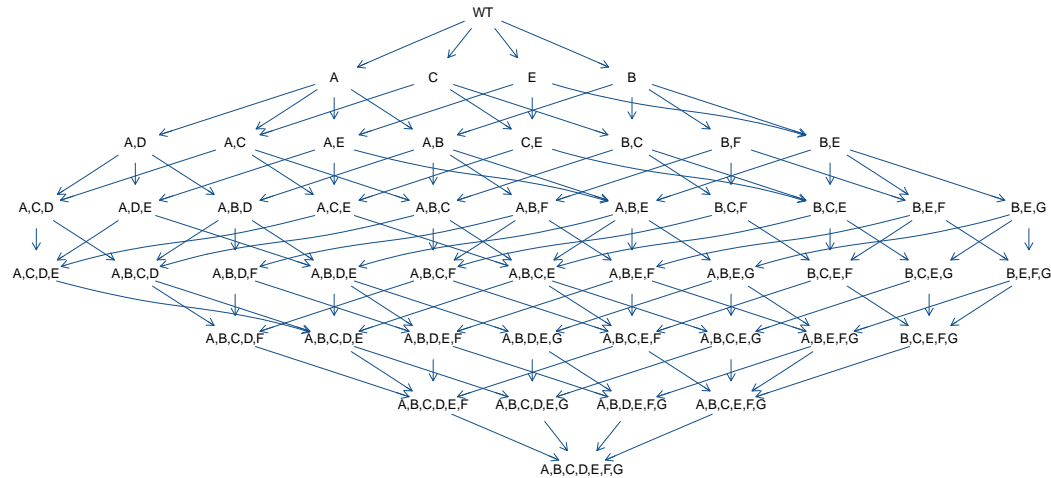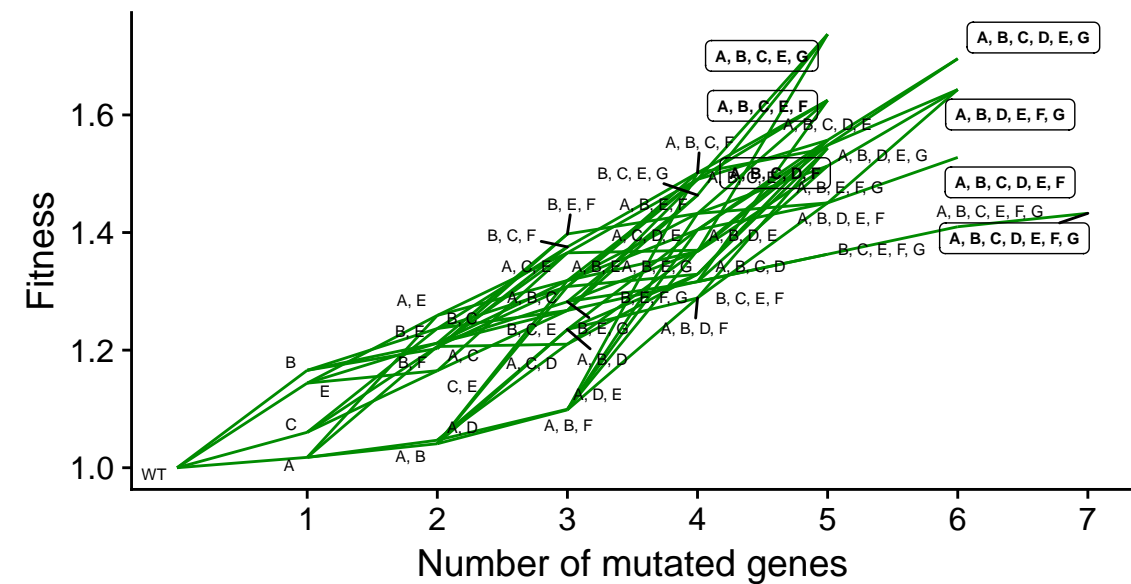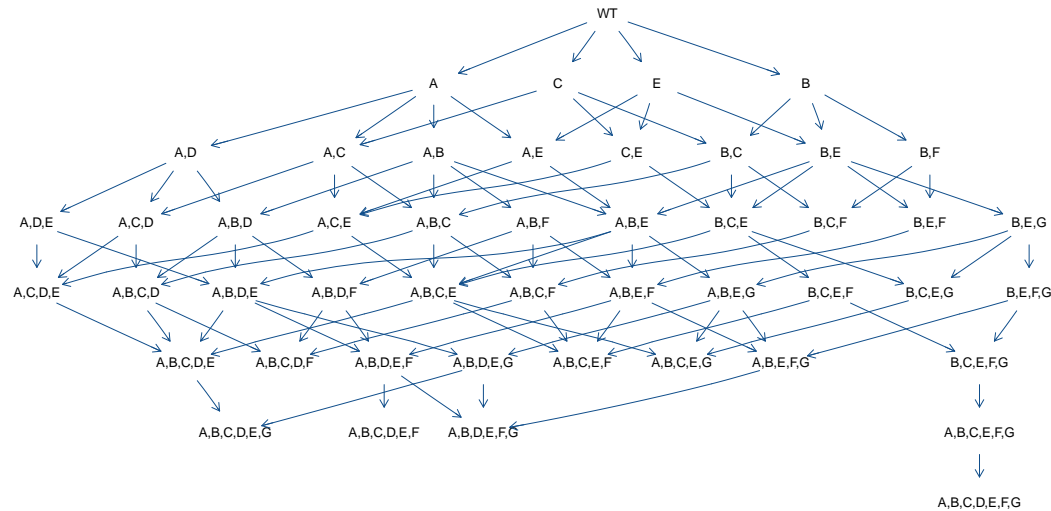

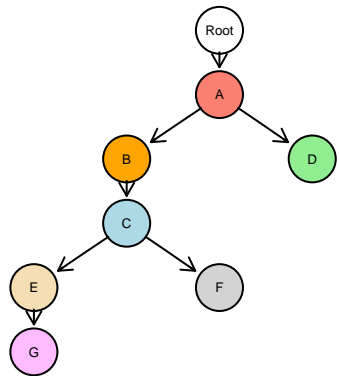

ID **lsjclB1mAC8mHR9Q**  
 acc genotypes **17**  
 peaks no back **3**  
 removed edges **3**  
 prop rem edges **0.111**

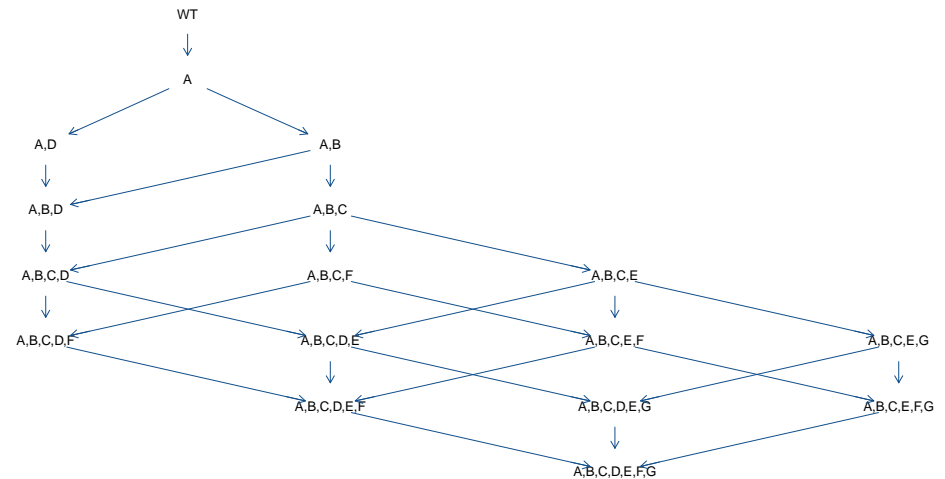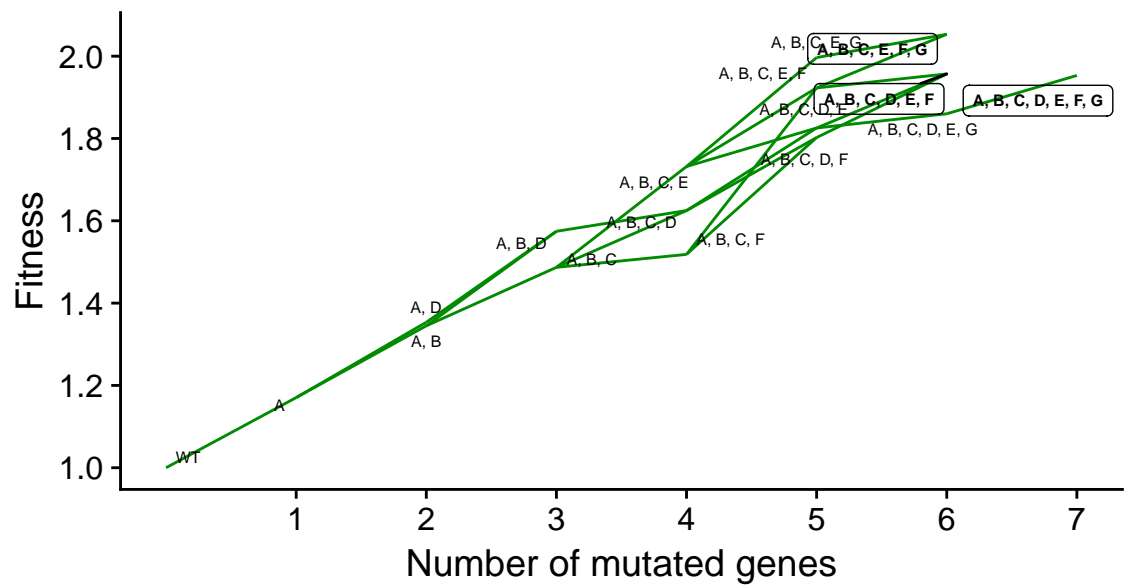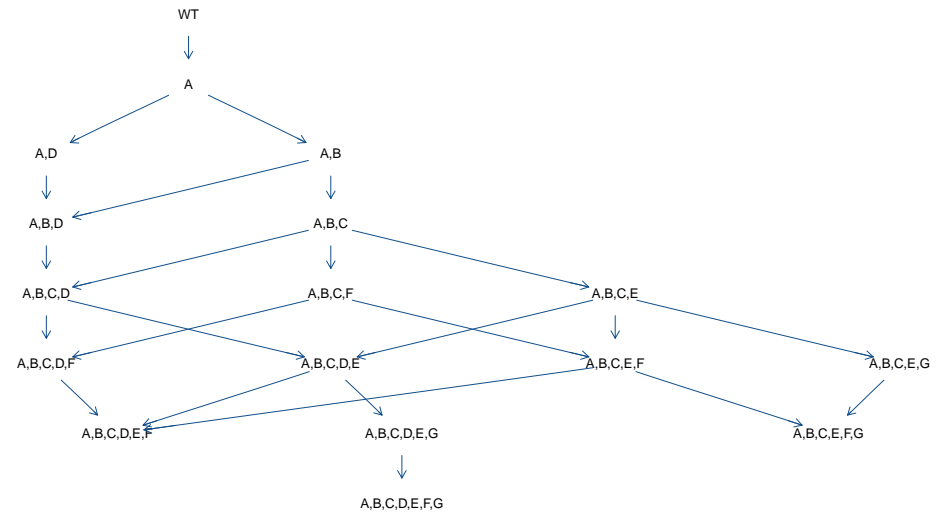

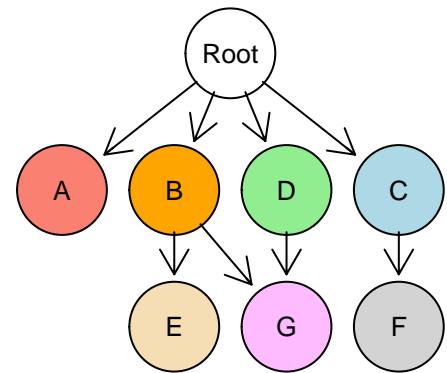

*ID* LSnOGiz5m5AoyDGr  
*acc genotypes* 48  
*peaks no back* 7  
*removed edges* 17  
*prop rem edges* 0.147

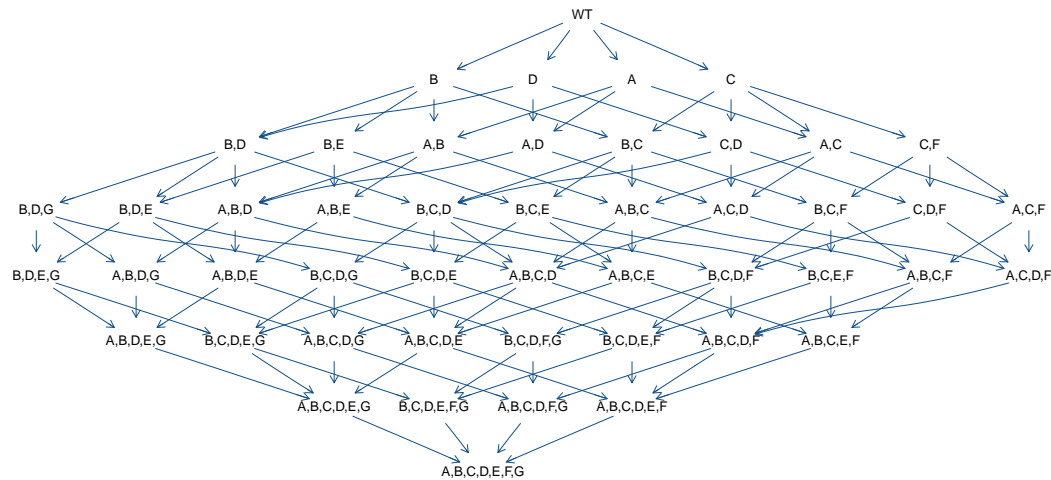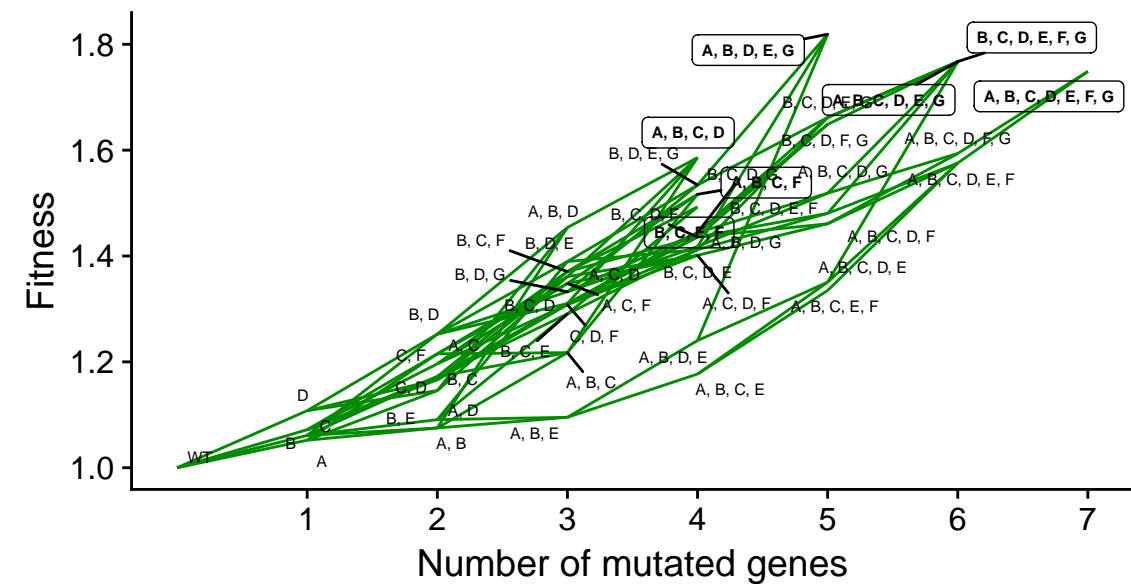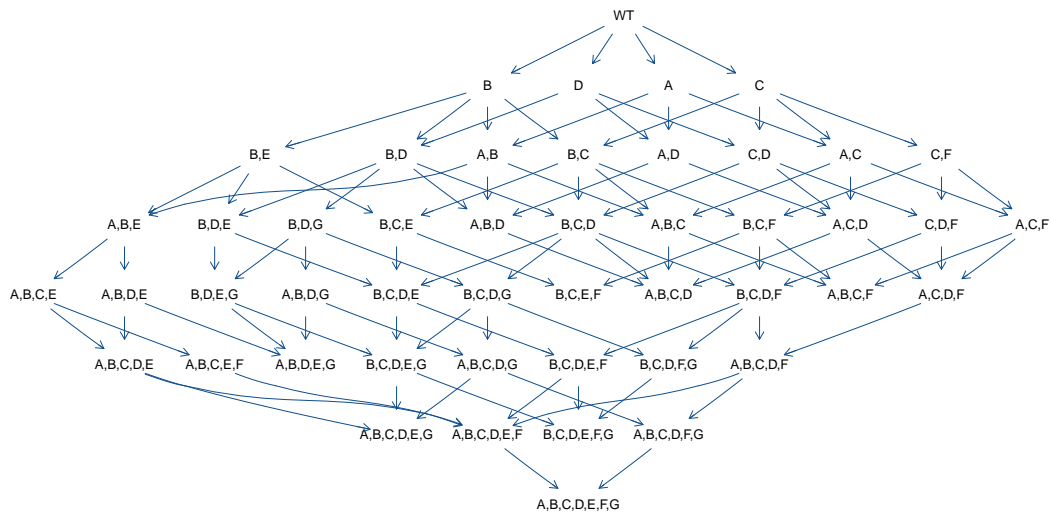

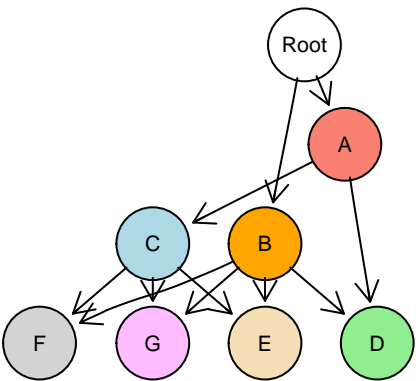

ID LSXwTnPZnOfXSdzA  
 acc genotypes 22  
 peaks no back 2  
 removed edges 2  
 prop rem edges 0.049

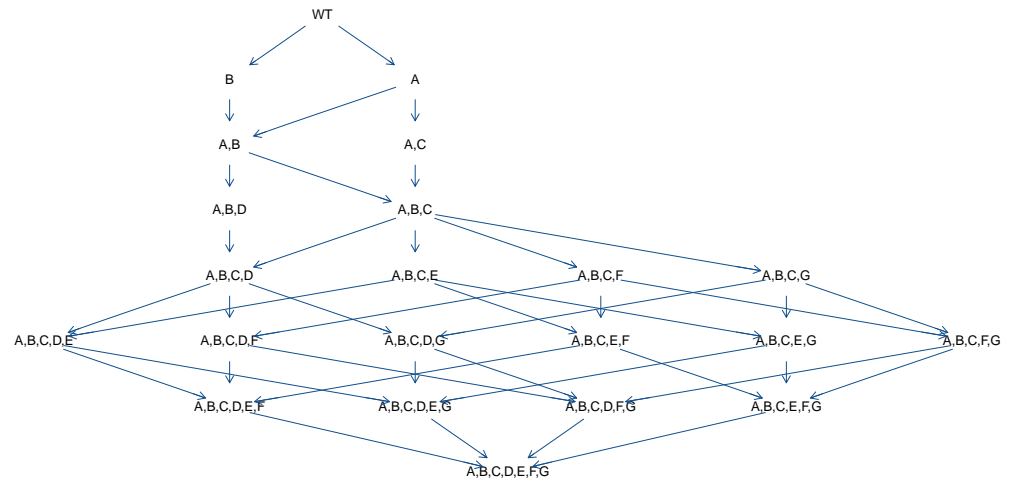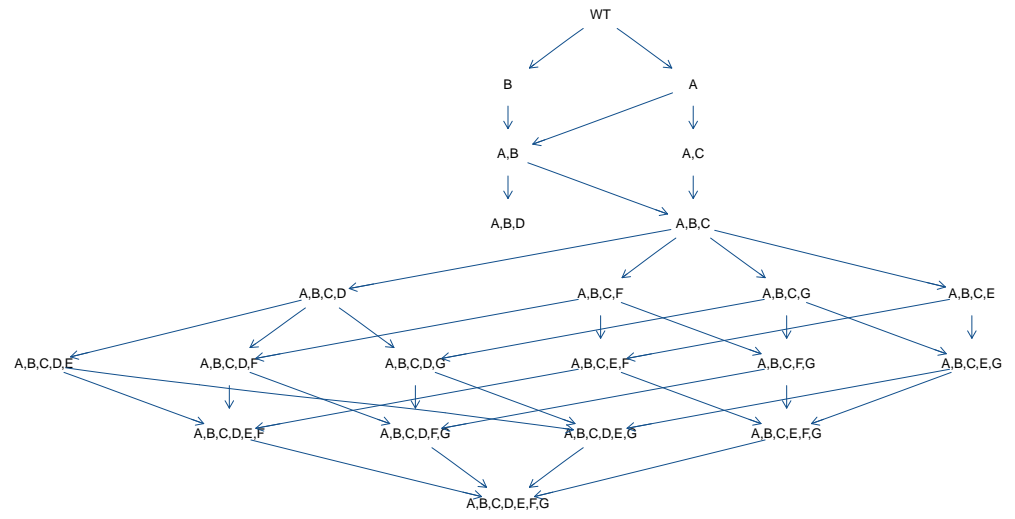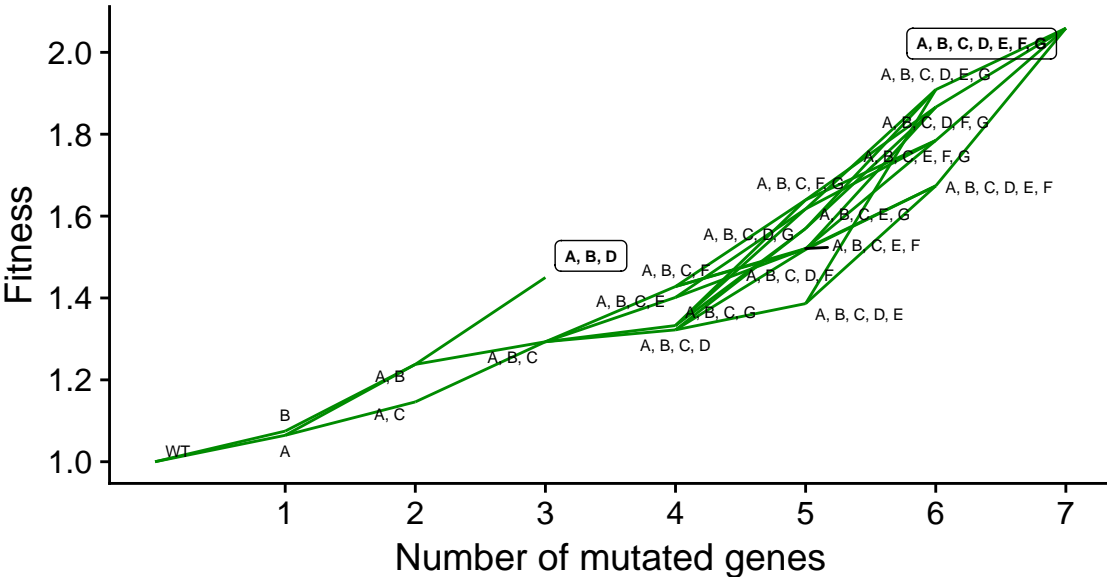



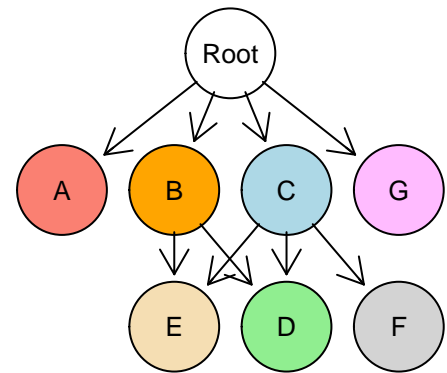

ID **IsZUuCCknMZno10B8**  
 acc genotypes **48**  
 peaks no back **8**  
 removed edges **21**  
 prop rem edges **0.175**

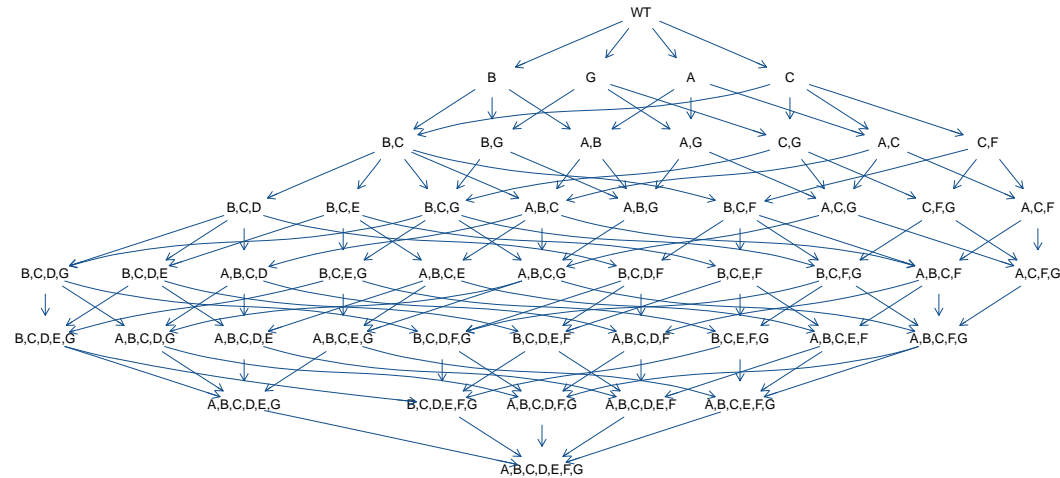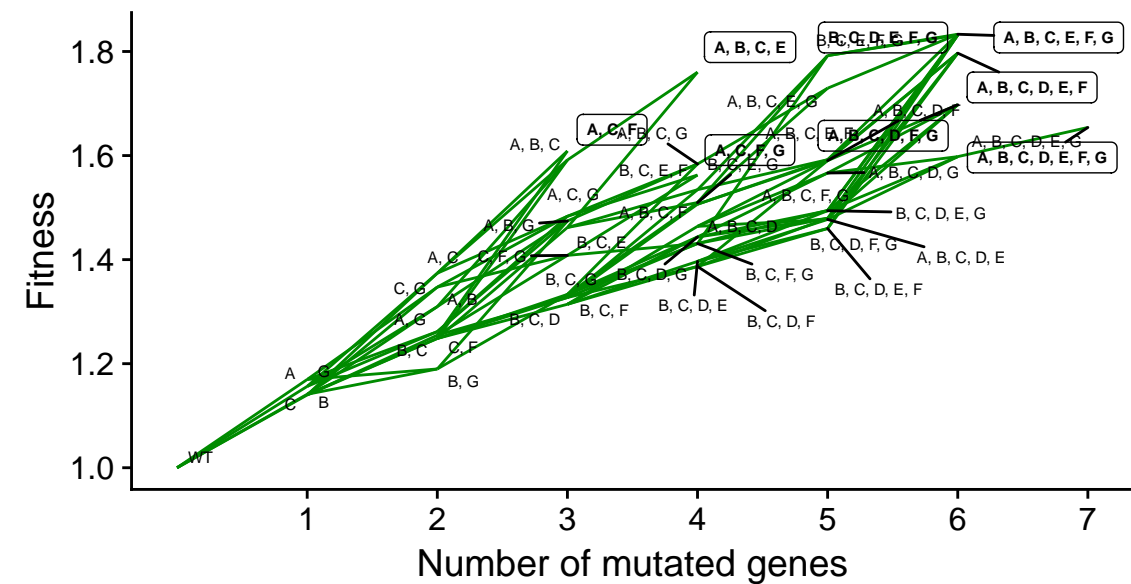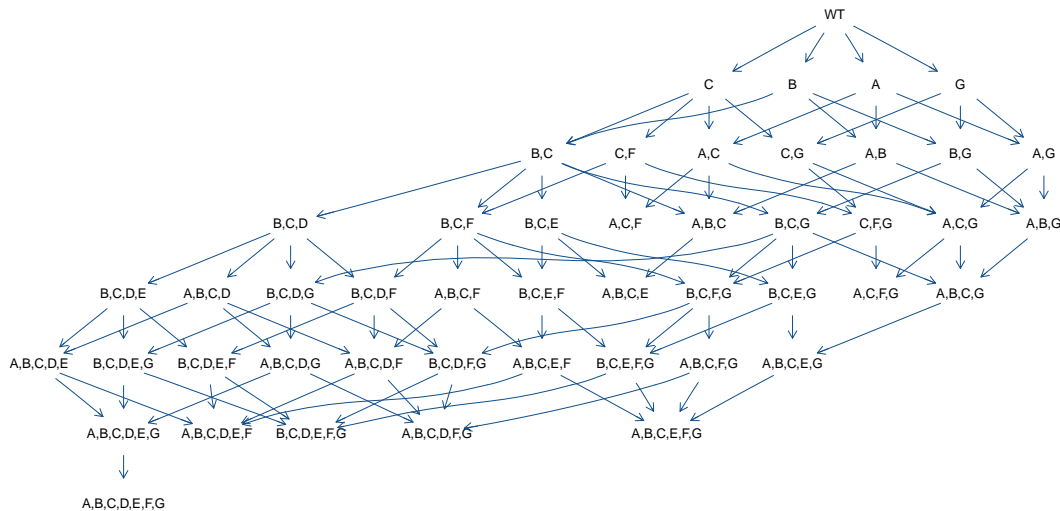

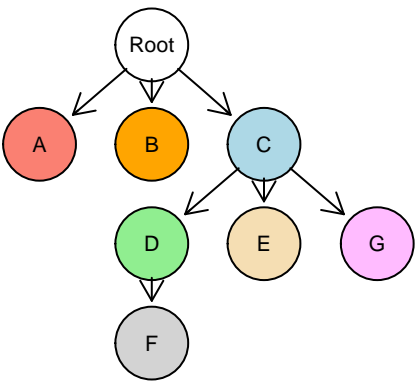

ID **m3T5PDQjmlID9CNk**  
 acc genotypes **52**  
 peaks no back **3**  
 removed edges **17**  
 prop rem edges **0.125**

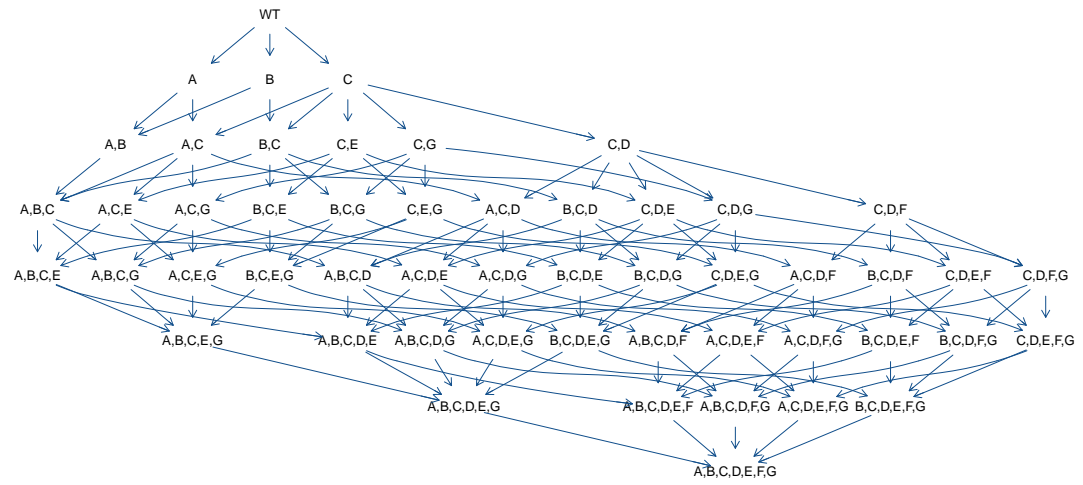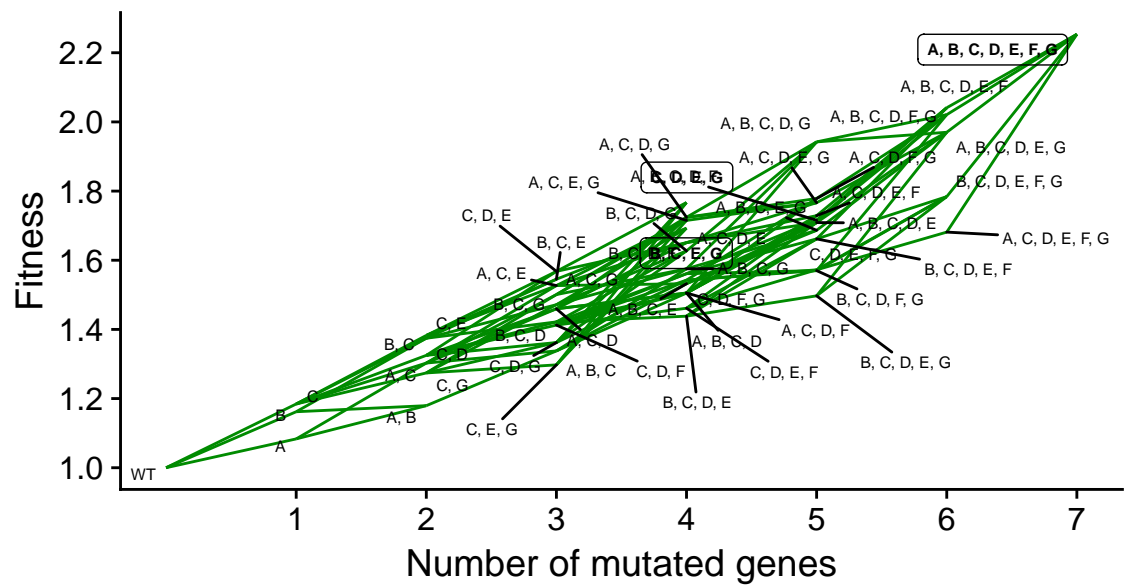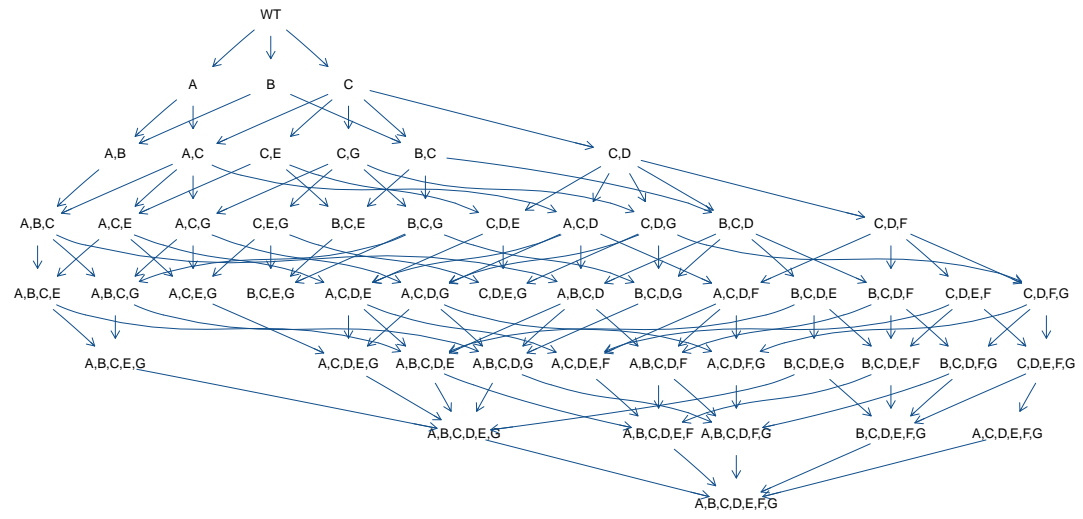

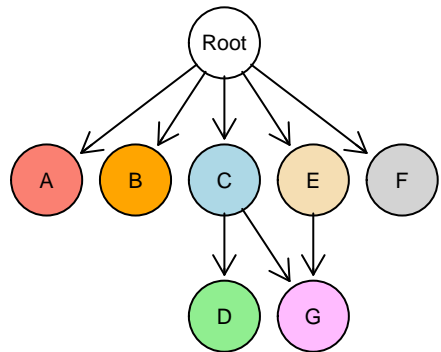

*ID* m8kM7ayaSoitwqmo  
*acc genotypes* 64  
*peaks no back* 11  
*removed edges* 36  
*prop rem edges* 0.205

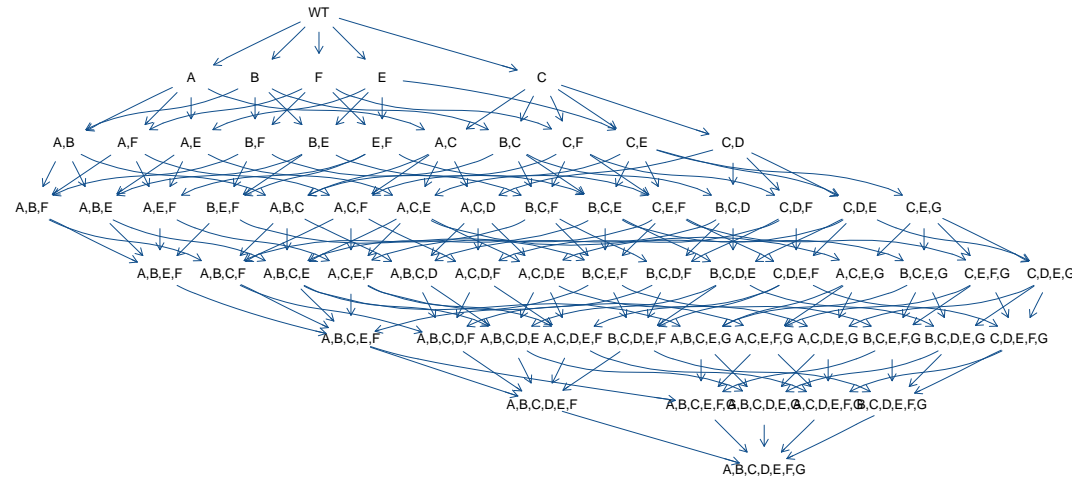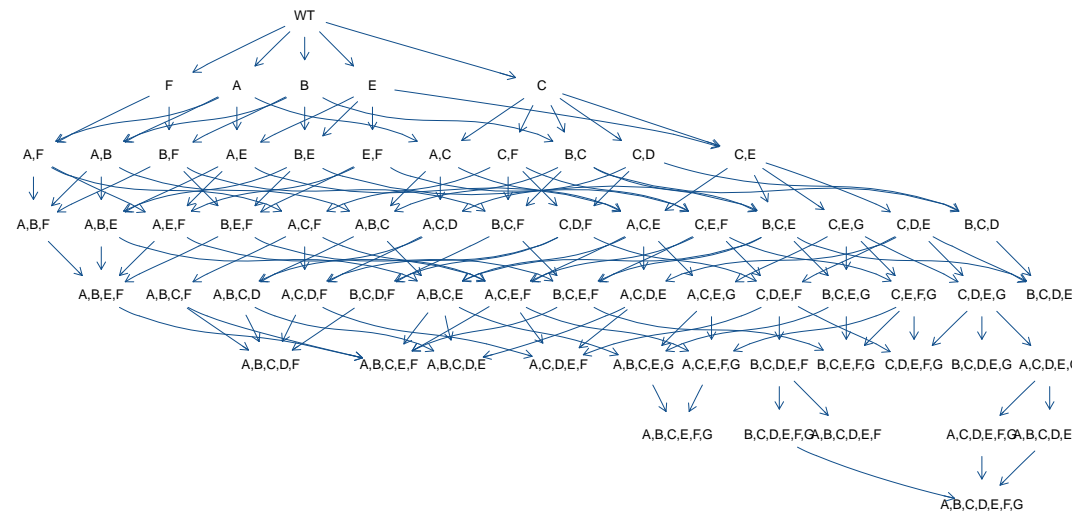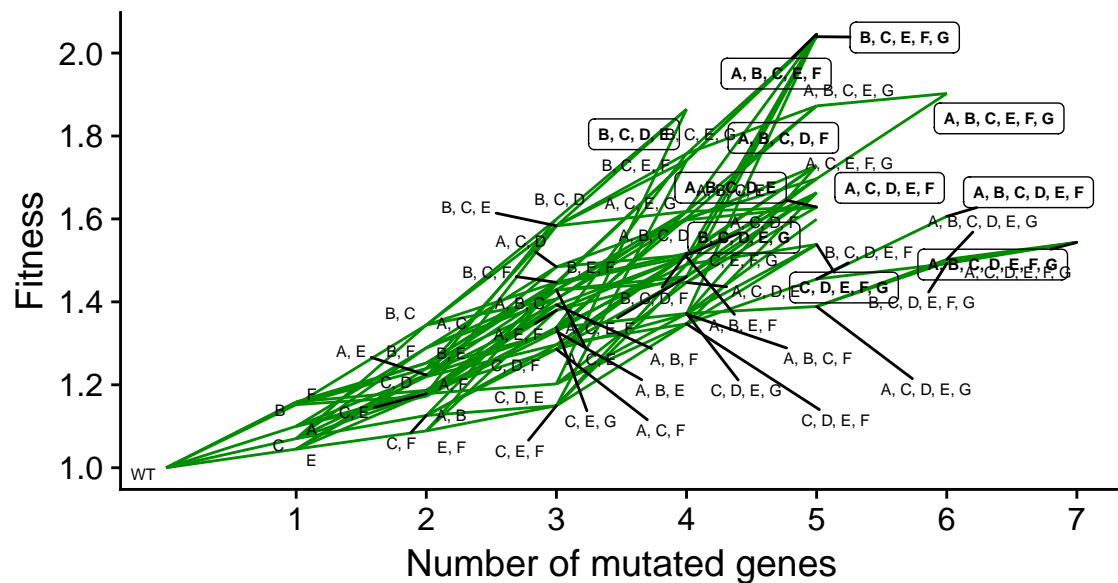

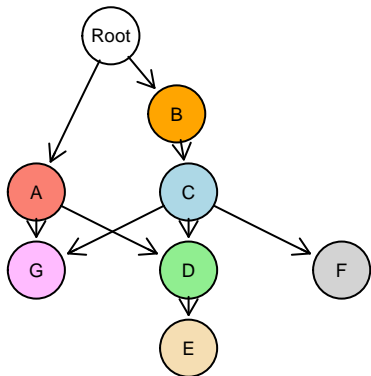

ID **MHkrL757u9iPj10kv**  
 acc genotypes **18**  
 peaks no back **4**  
 removed edges **4**  
 prop rem edges **0.138**

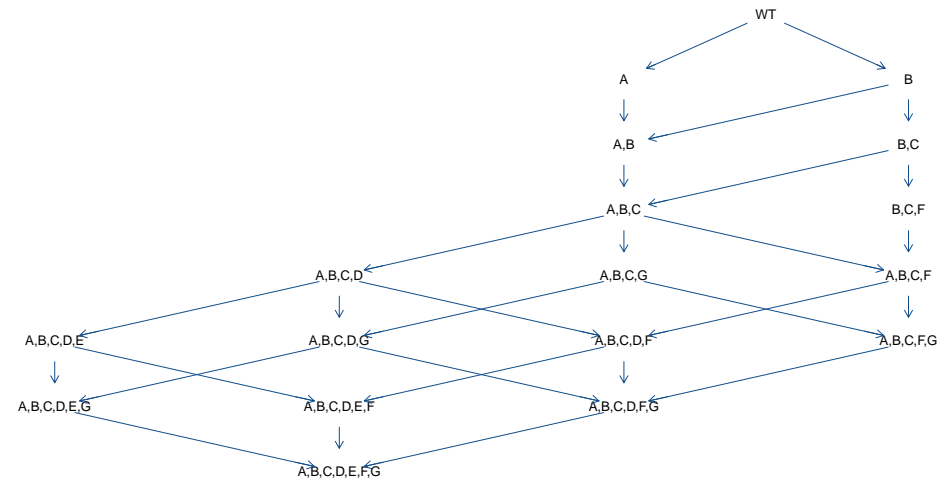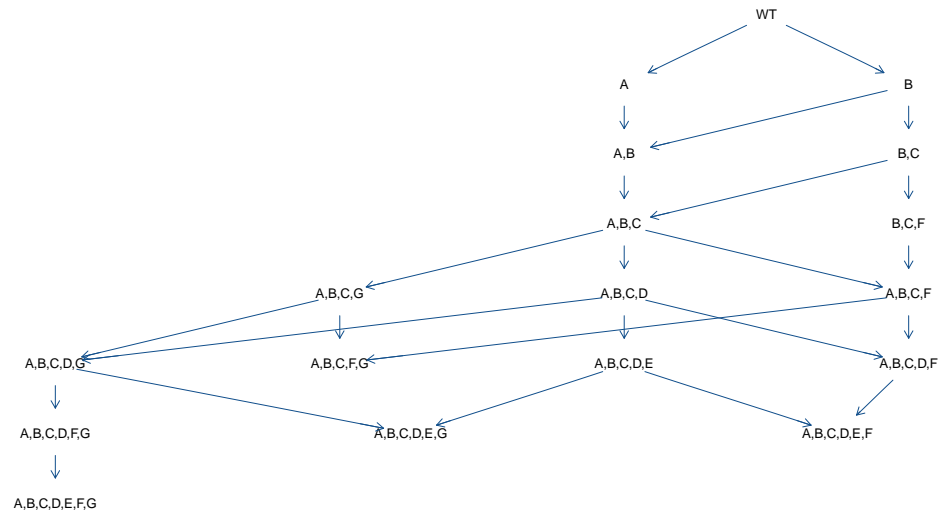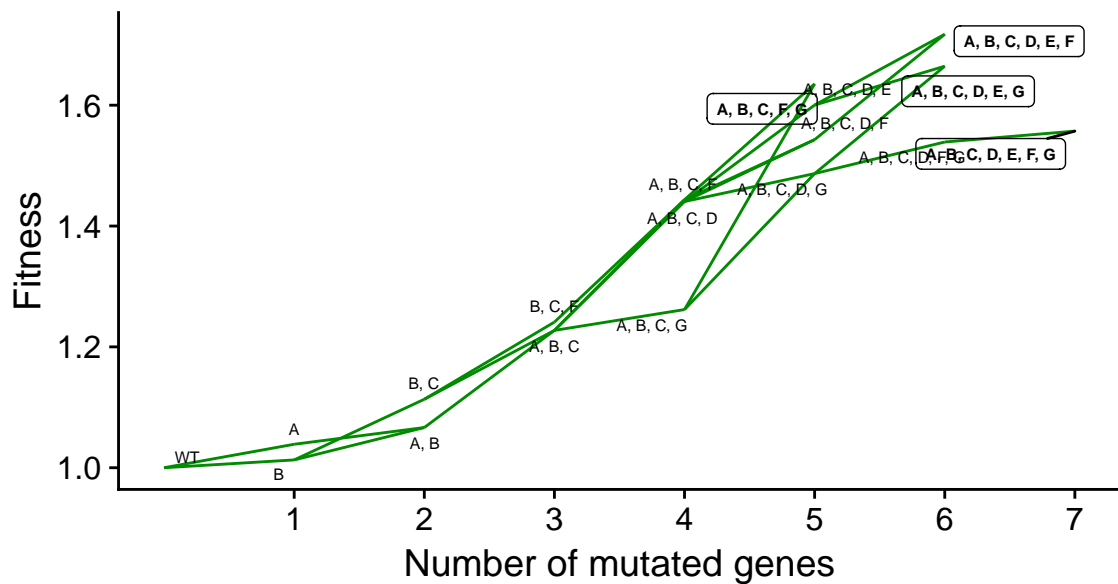

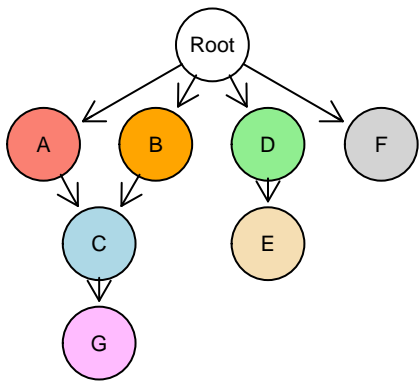

*ID* MifrHKJzEqocbcMH  
*acc genotypes* 36  
*peaks no back* 3  
*removed edges* 9  
*prop rem edges* 0.115

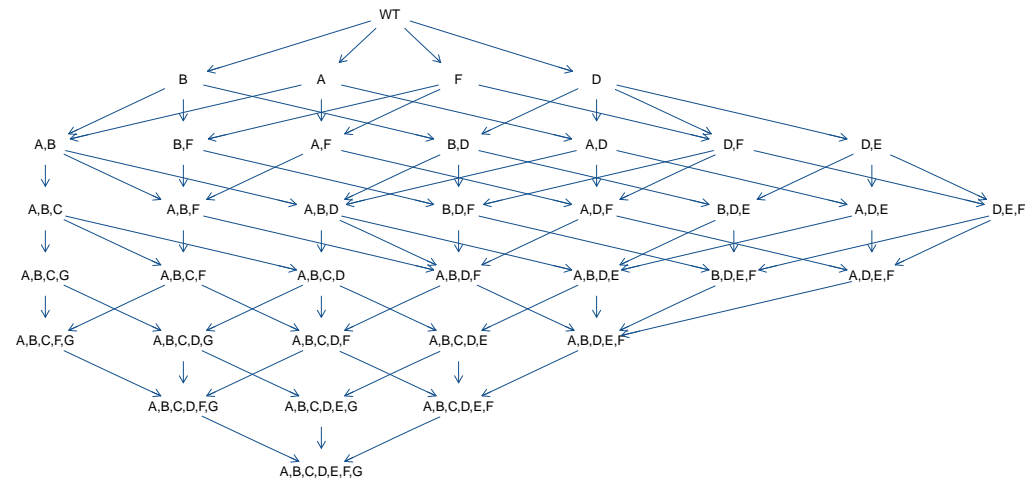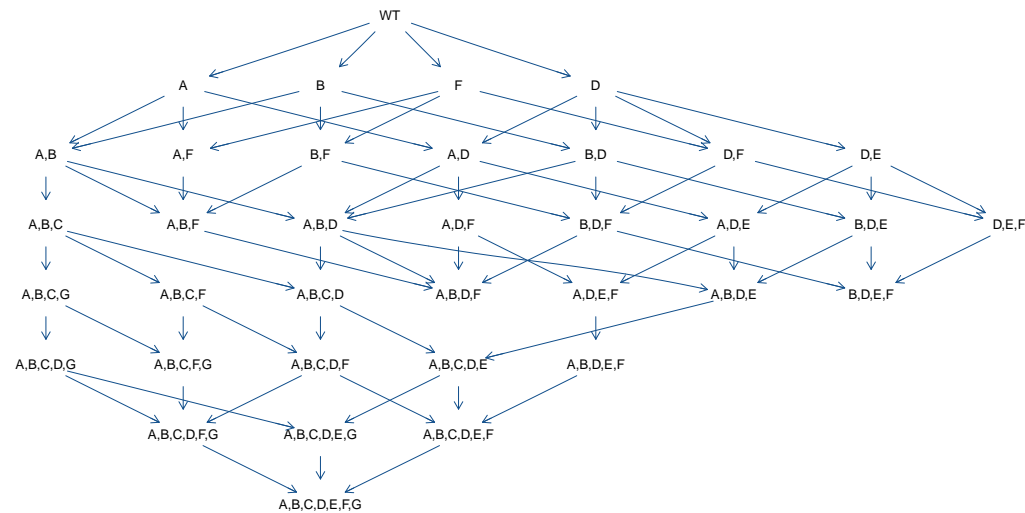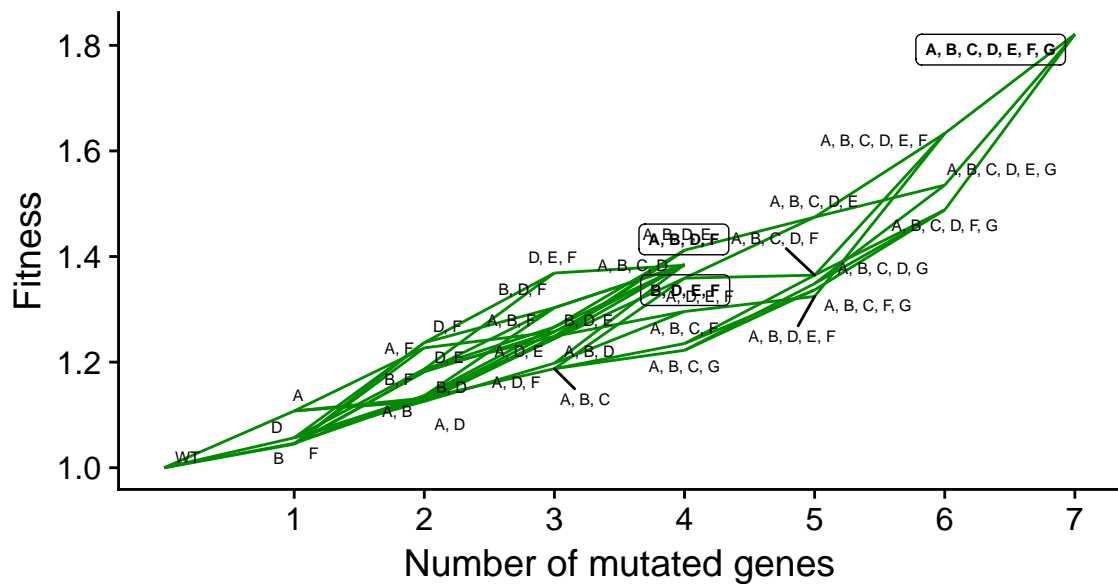

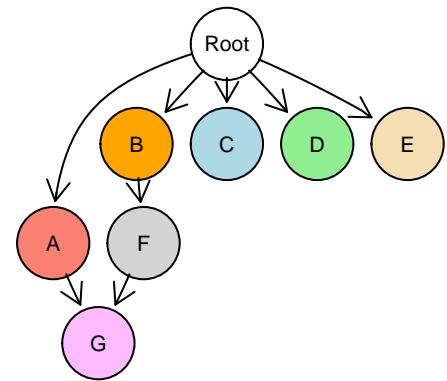

*ID* mtZbHQ97Njy8xIsf  
*acc genotypes* 56  
*peaks no back* 10  
*removed edges* 26  
*prop rem edges* 0.176

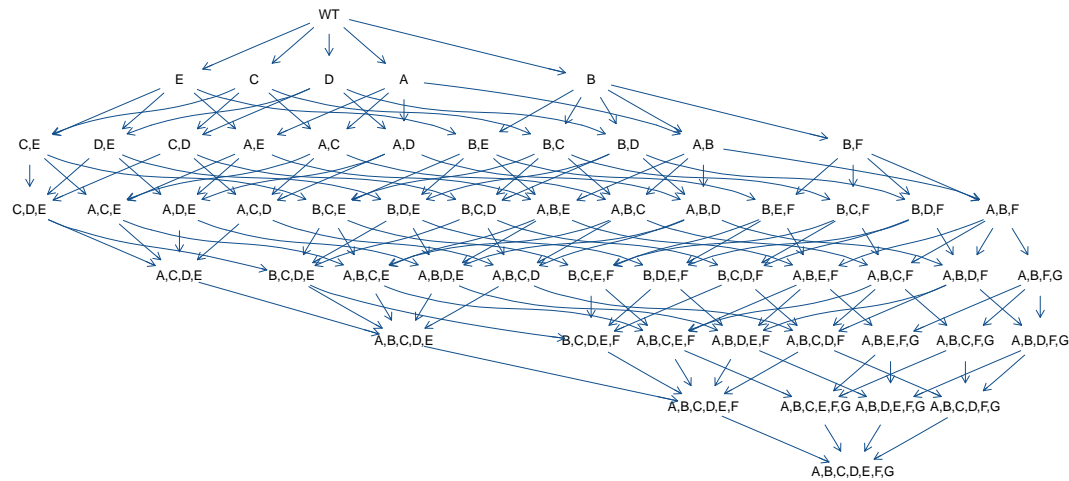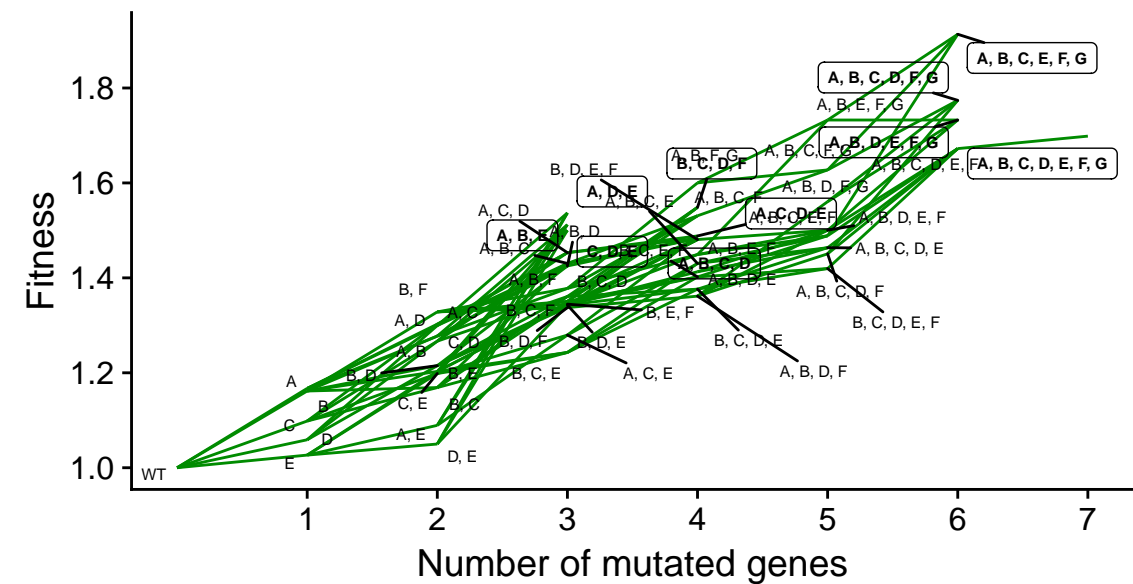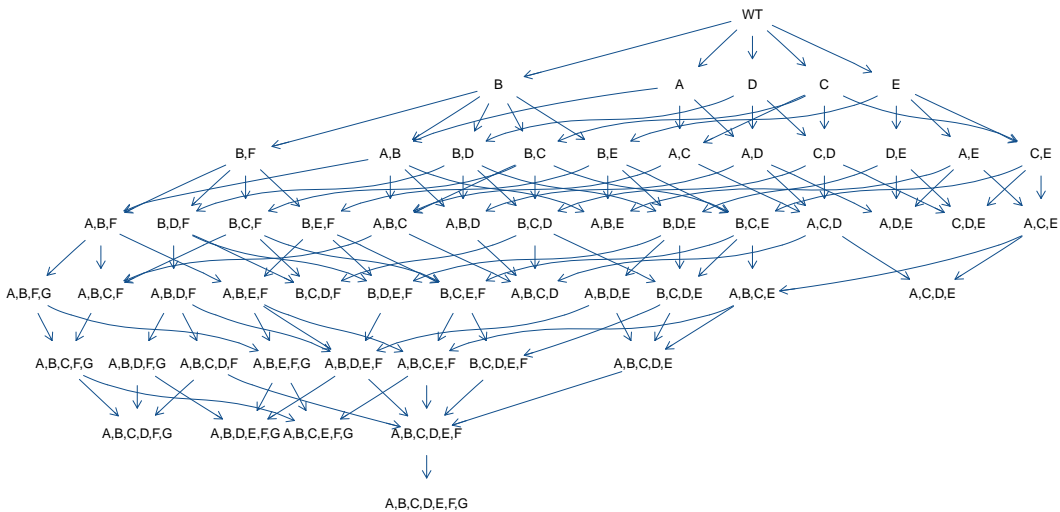

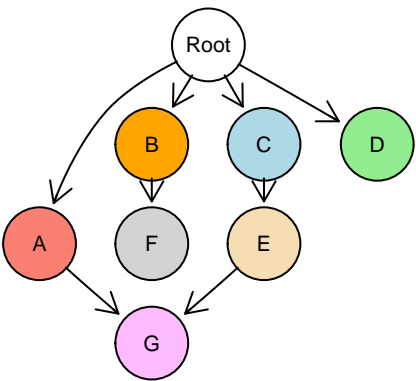

ID **MuAVAUt10hjGNt5AD**  
 acc genotypes **42**  
 peaks no back **7**  
 removed edges **15**  
 prop rem edges **0.155**

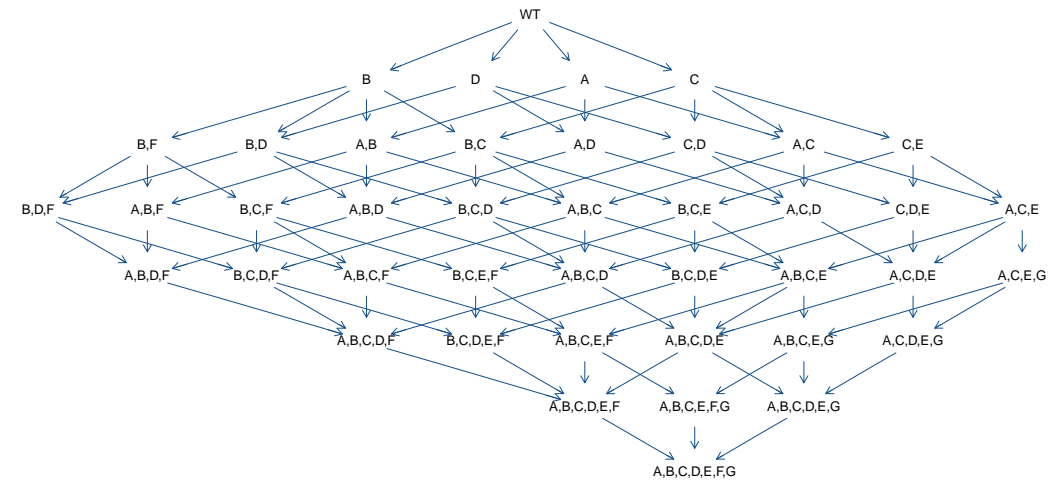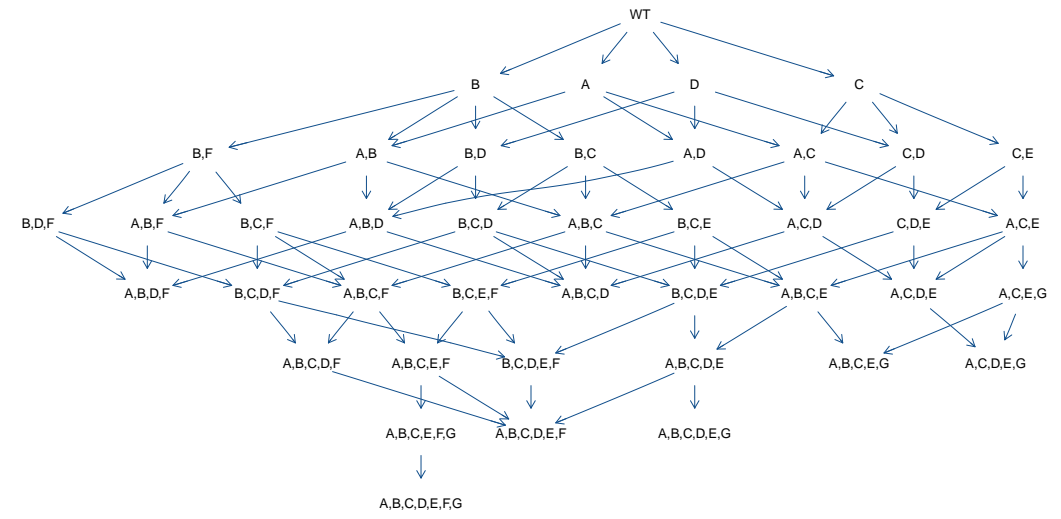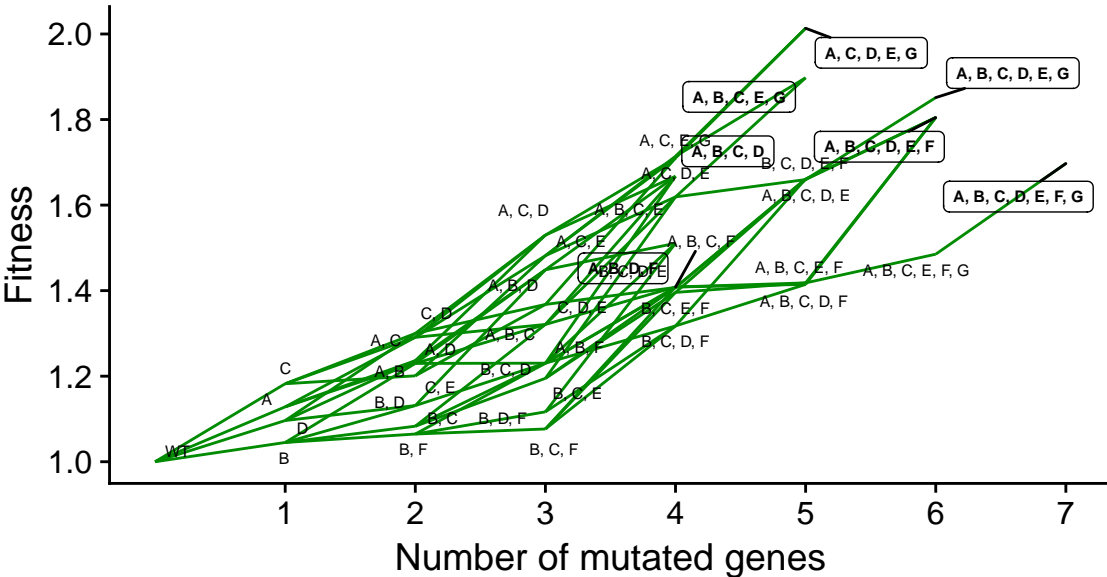

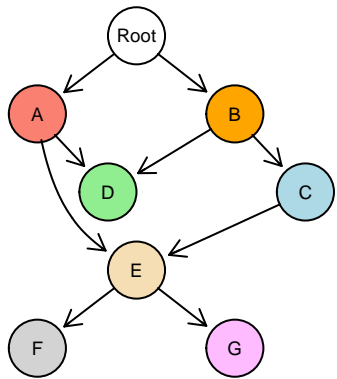

ID **mZBzm7cVIBm3NJil**  
 acc genotypes **16**  
 peaks no back **2**  
 removed edges **2**  
 prop rem edges **0.083**

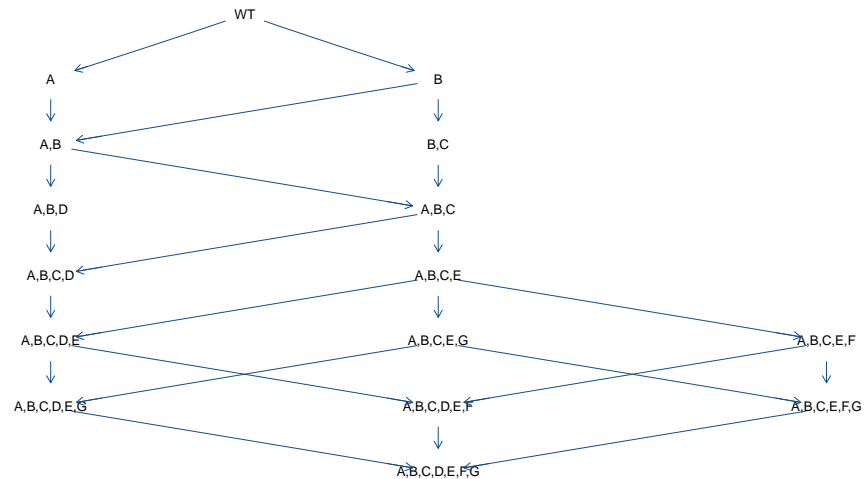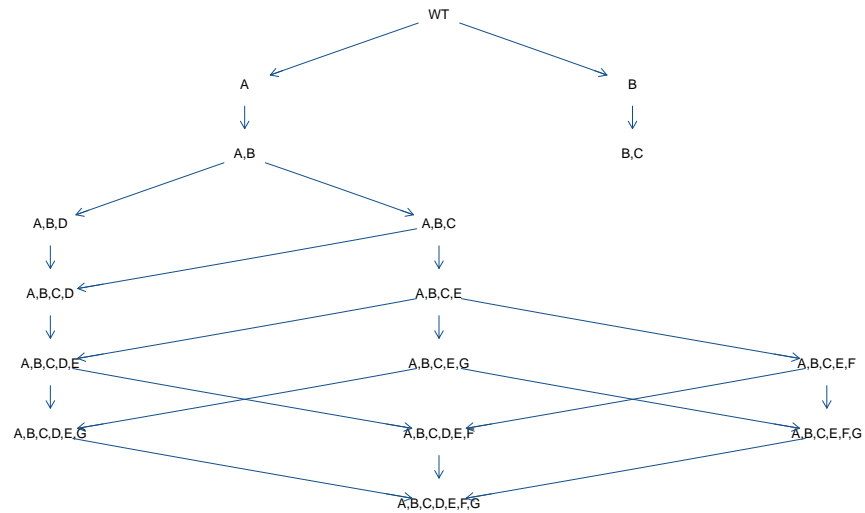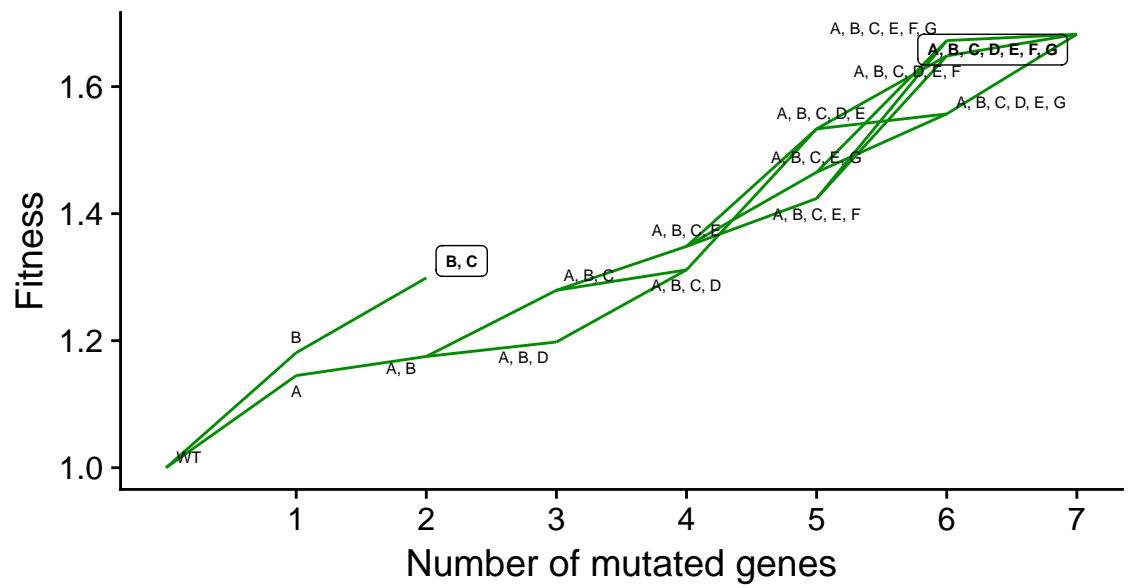



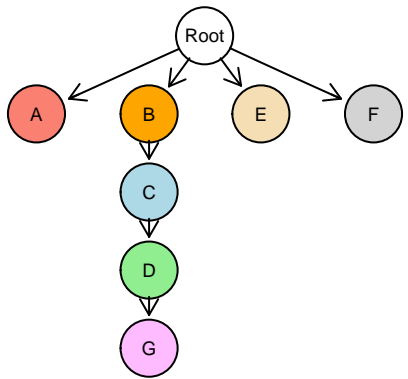

ID **N7LwhGSvS3wDt8P2**  
 acc genotypes **40**  
 peaks no back **7**  
 removed edges **13**  
 prop rem edges **0.141**

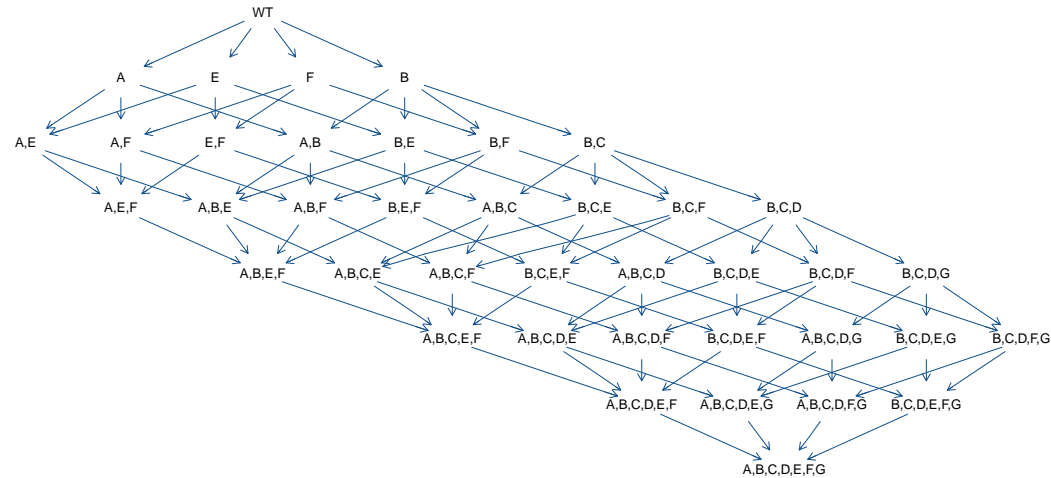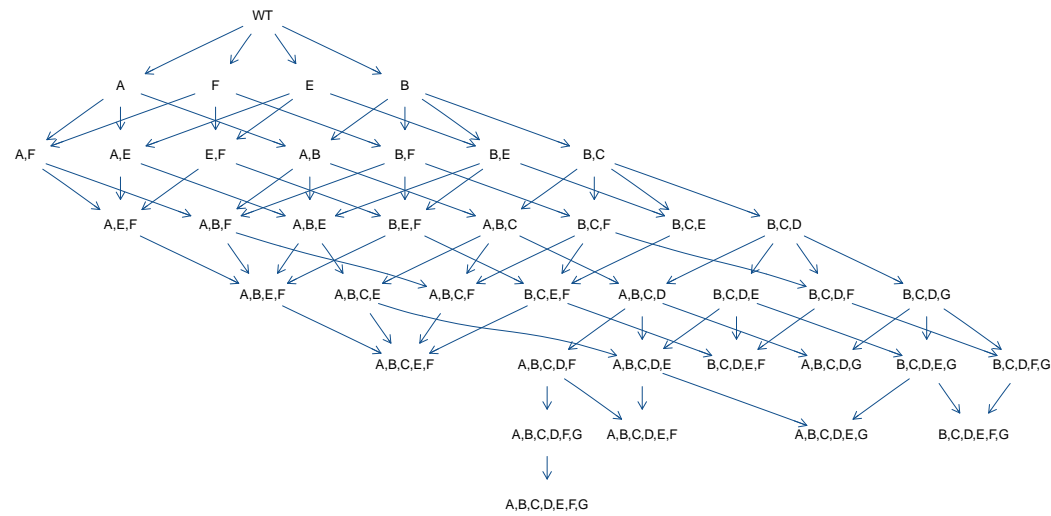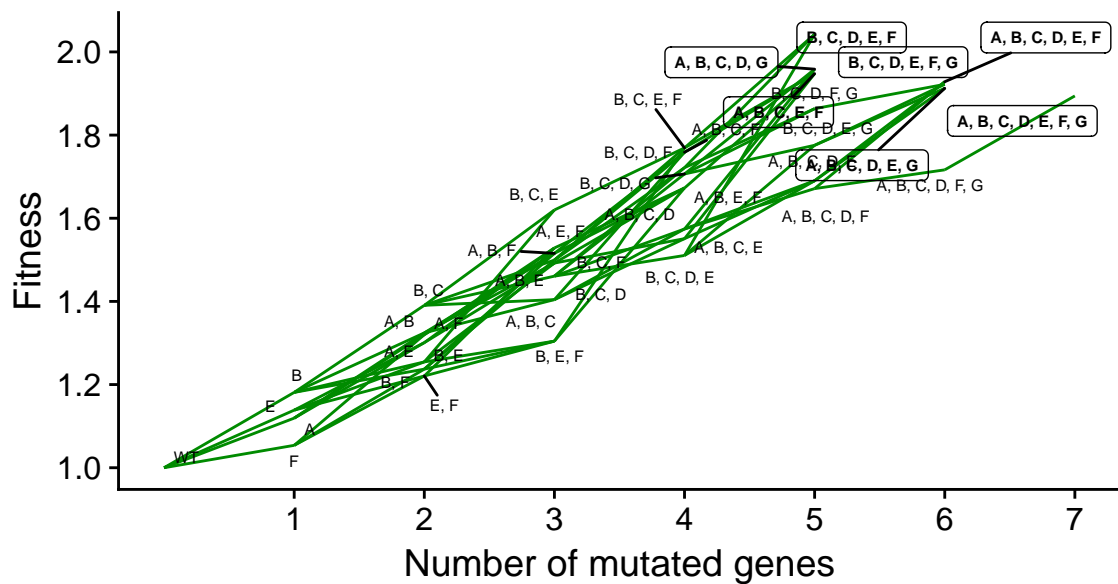

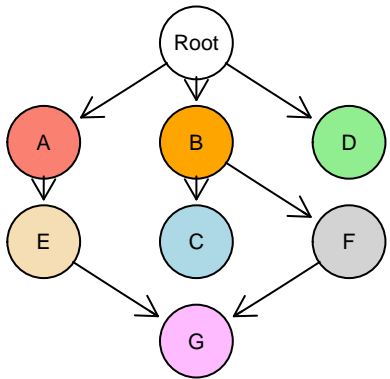

ID **nAB3TW1qrCNzLA92**  
 acc genotypes **34**  
 peaks no back **5**  
 removed edges **10**  
 prop rem edges **0.137**

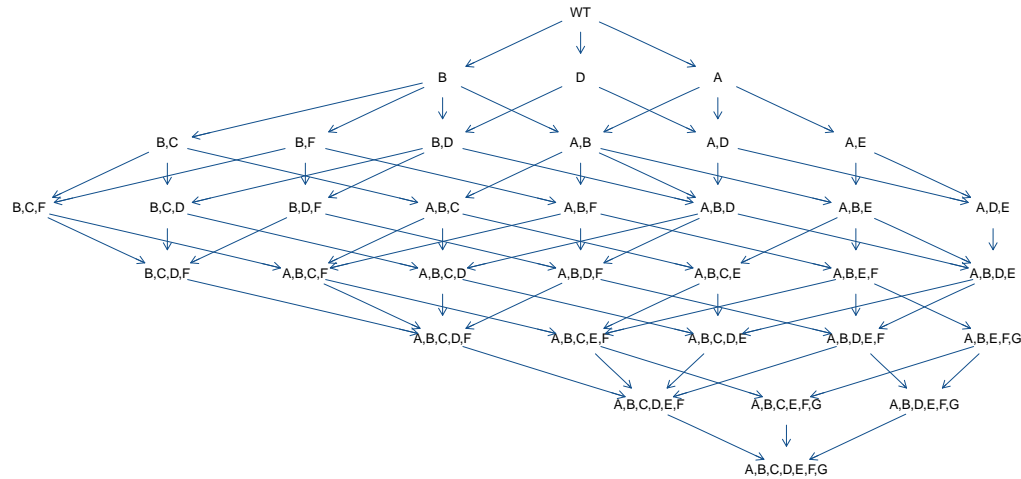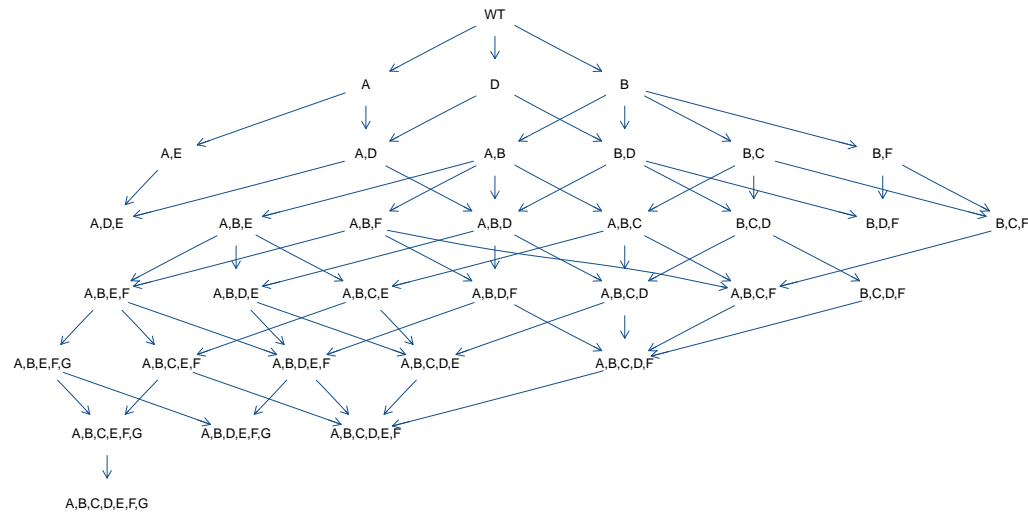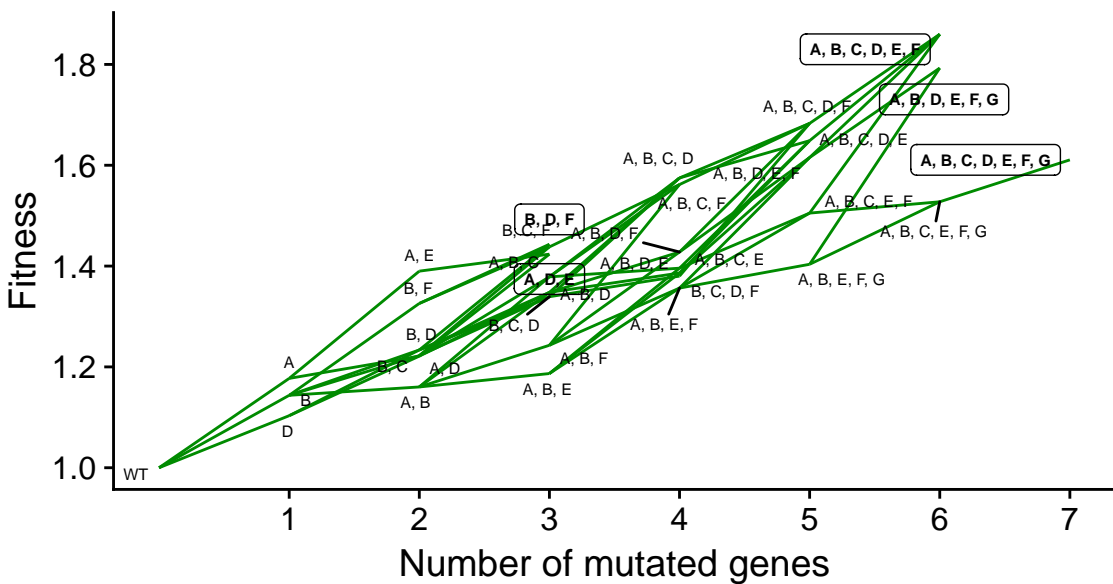

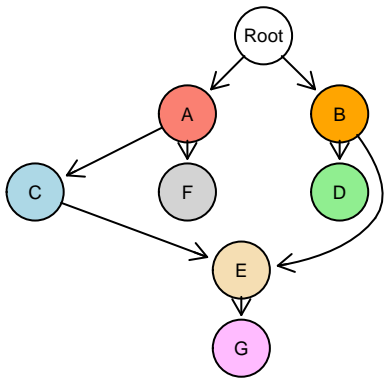

ID **Nc8hEZJTul6Jz10xm**  
 acc genotypes **23**  
 peaks no back **5**  
 removed edges **9**  
 prop rem edges **0.22**

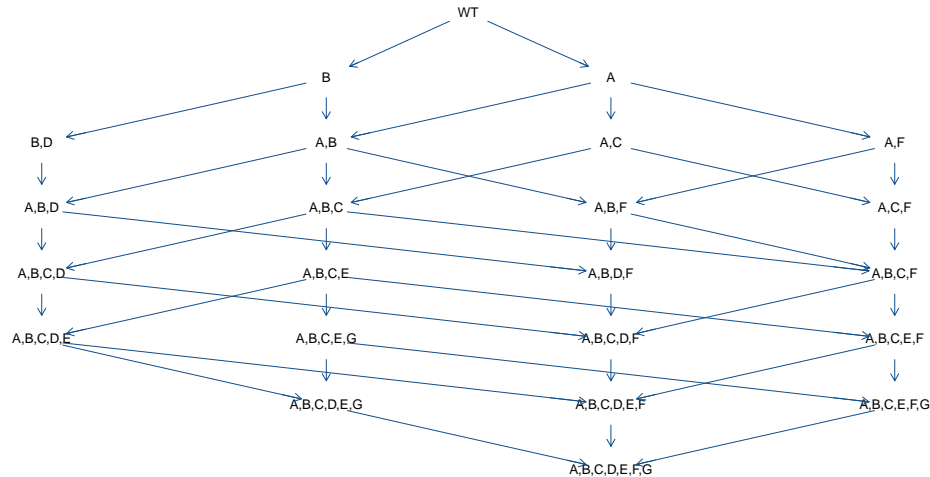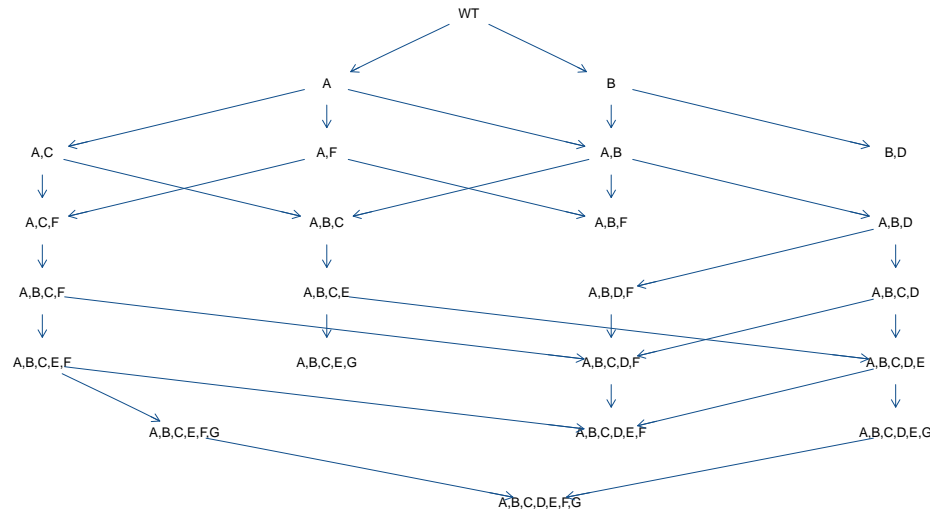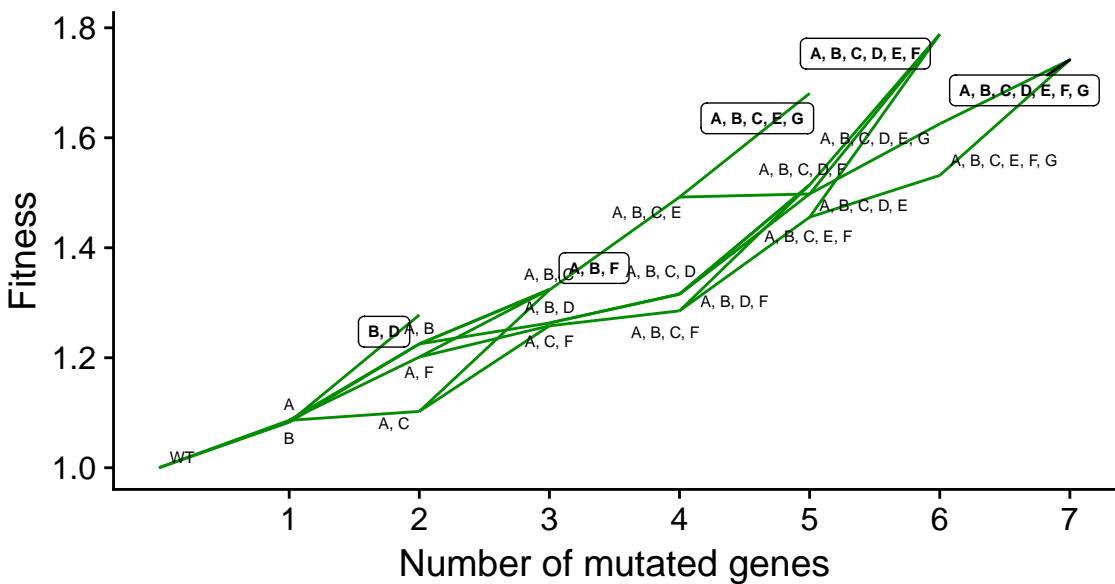

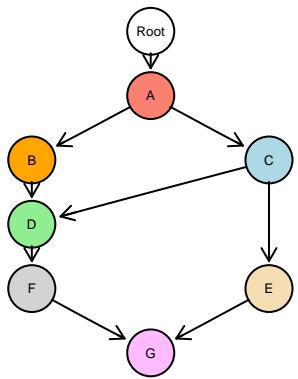

*ID* nCI8mAj78ZzZKIBn  
*acc genotypes* 12  
*peaks no back* 2  
*removed edges* 1  
*prop rem edges* 0.067

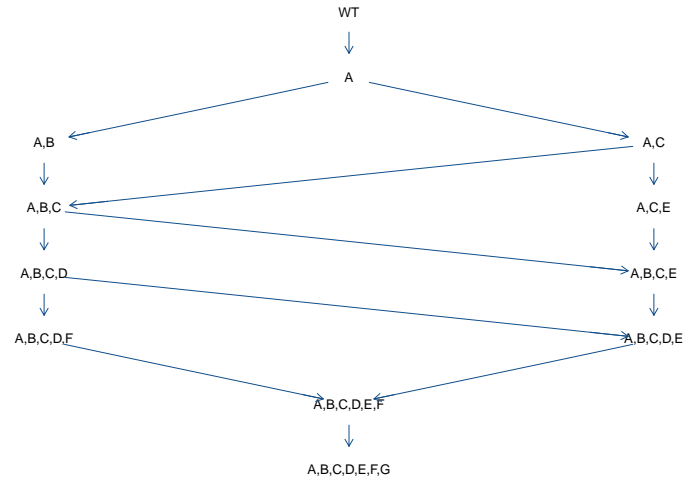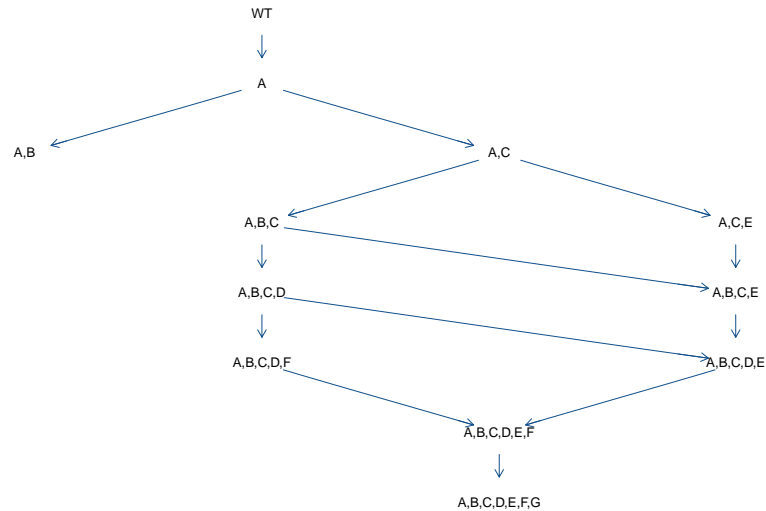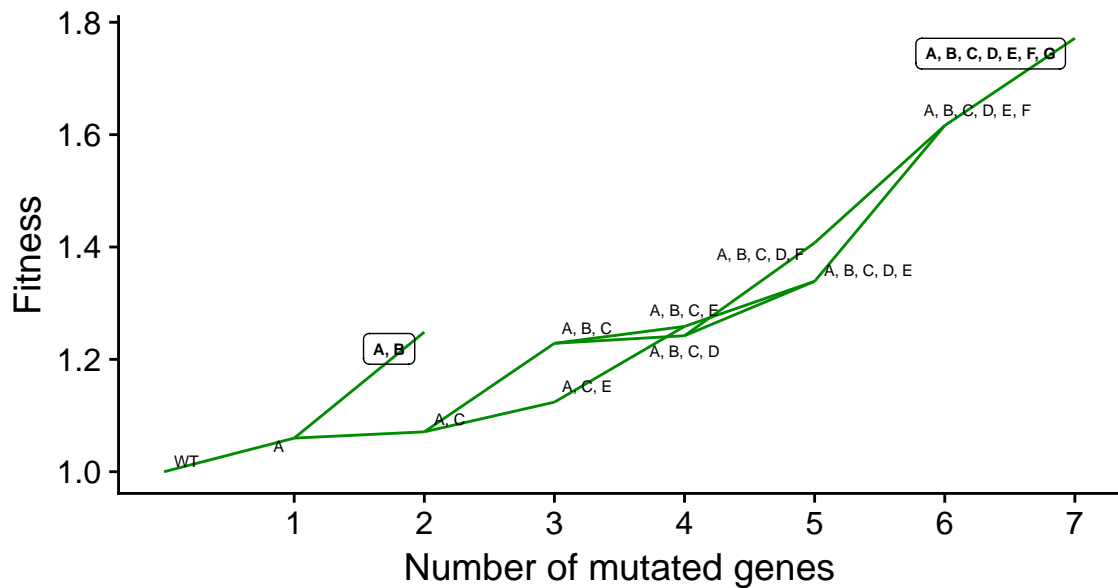



ID **nKSE4LBW1z9FriV10**  
 acc genotypes **13**  
 peaks no back 2  
 removed edges 2  
 prop rem edges 0.111

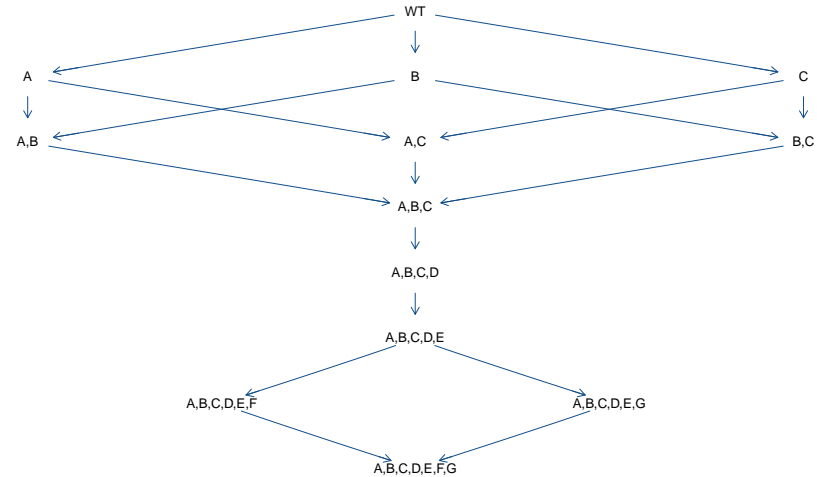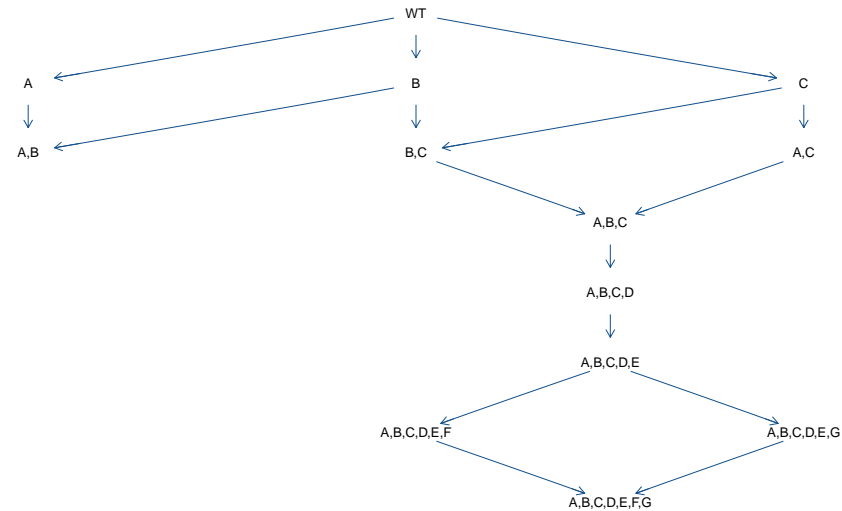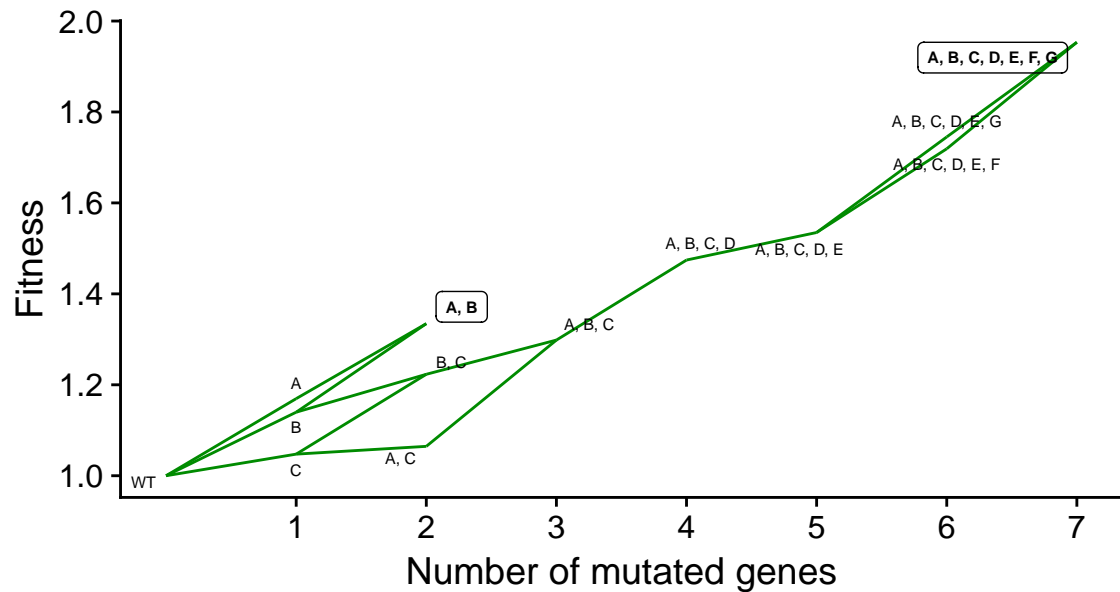











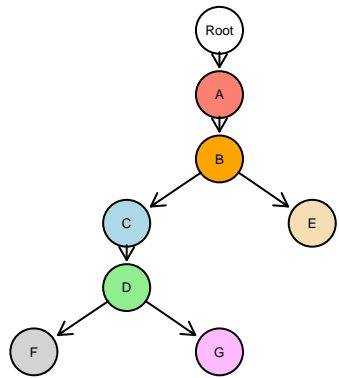

ID [o4Y3hPxIjQmaWRx1](#)  
 acc genotypes 14  
 peaks no back 2  
 removed edges 1  
 prop rem edges 0.05

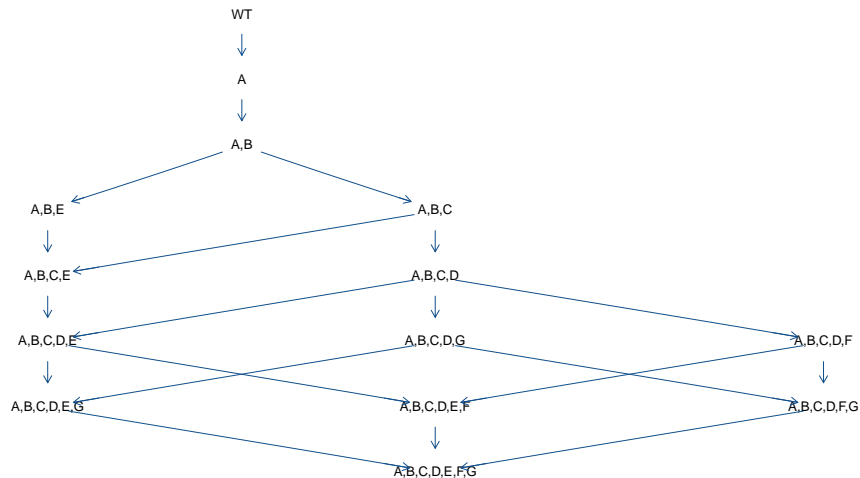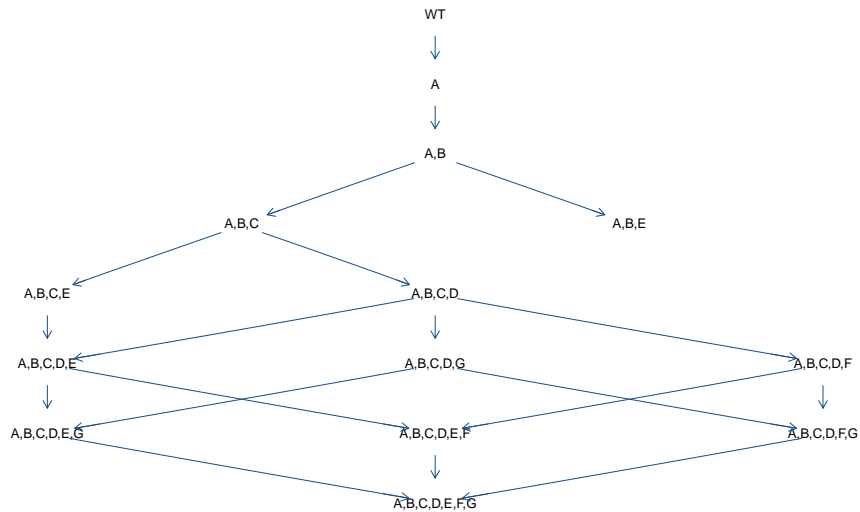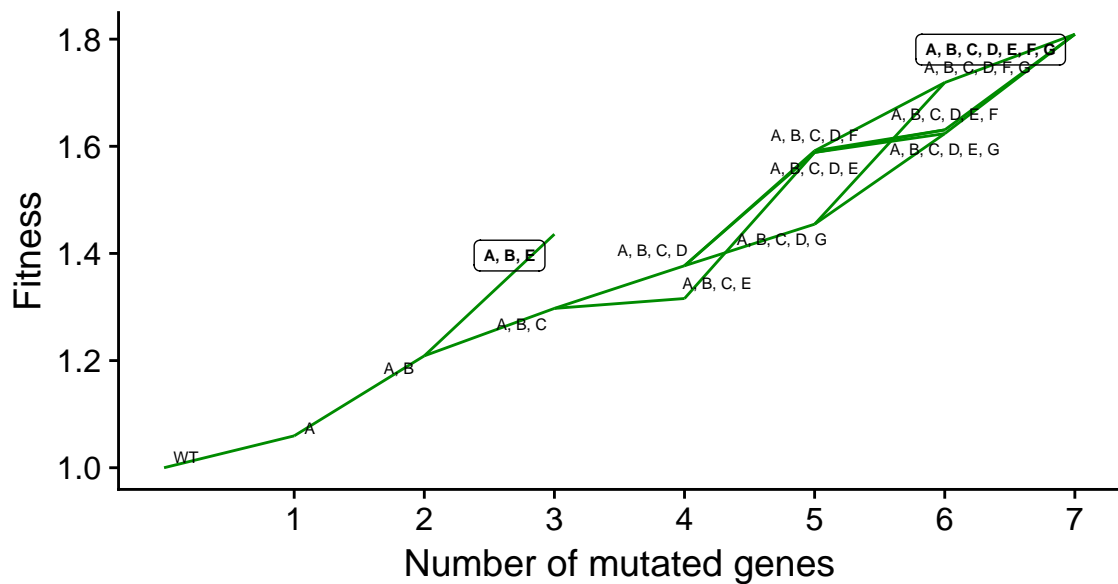

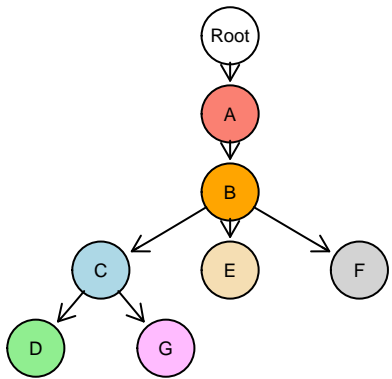

ID OaMMWW2waVOxtGK3  
 acc genotypes 22  
 peaks no back 5  
 removed edges 5  
 prop rem edges 0.119

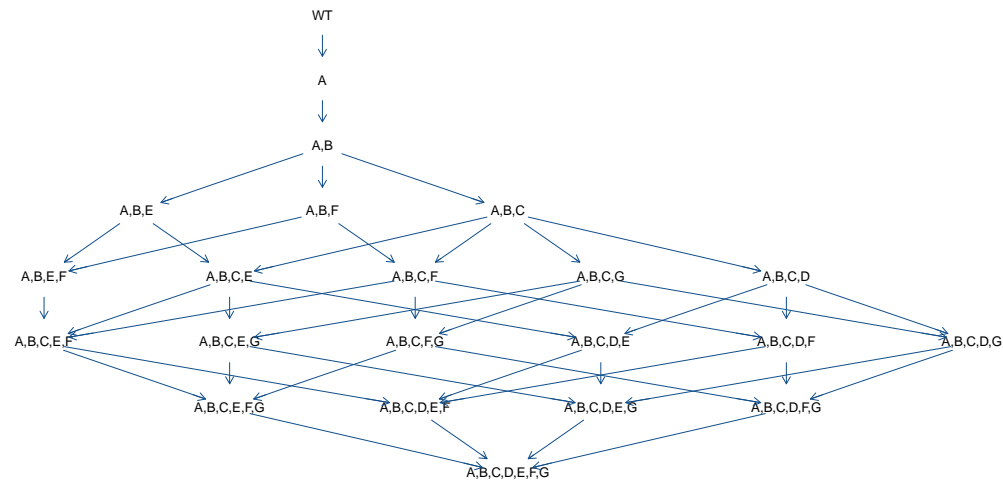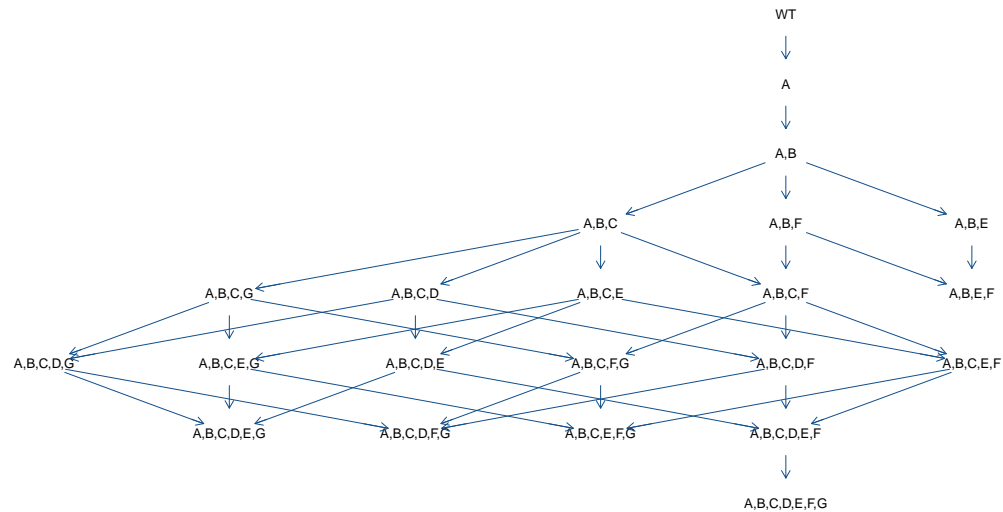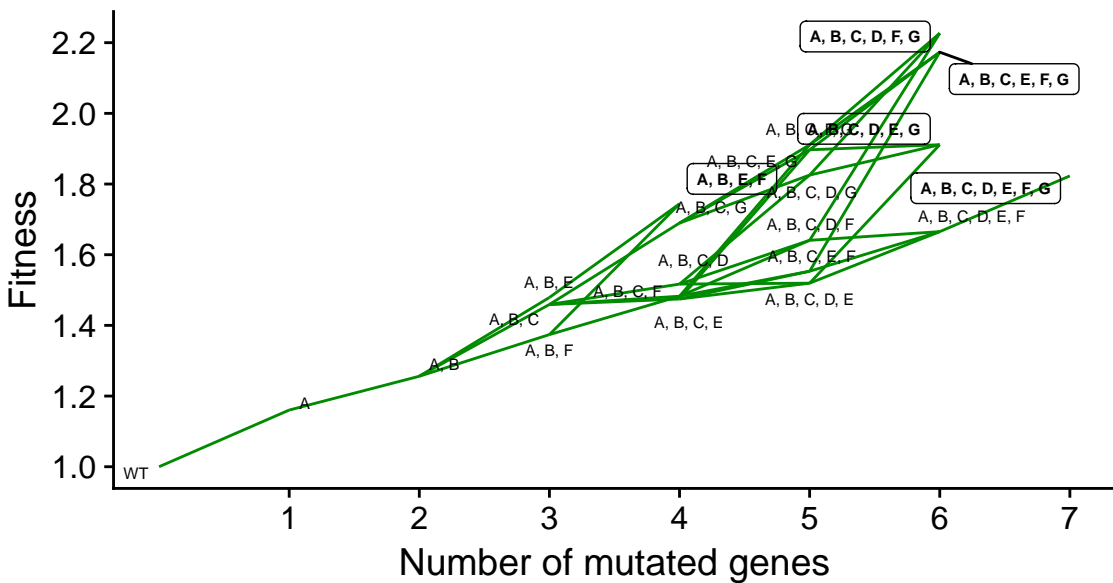



ID **ODbe43XDGuHvXueq**  
 acc genotypes **37**  
 peaks no back **3**  
 removed edges **6**  
 prop rem edges **0.067**

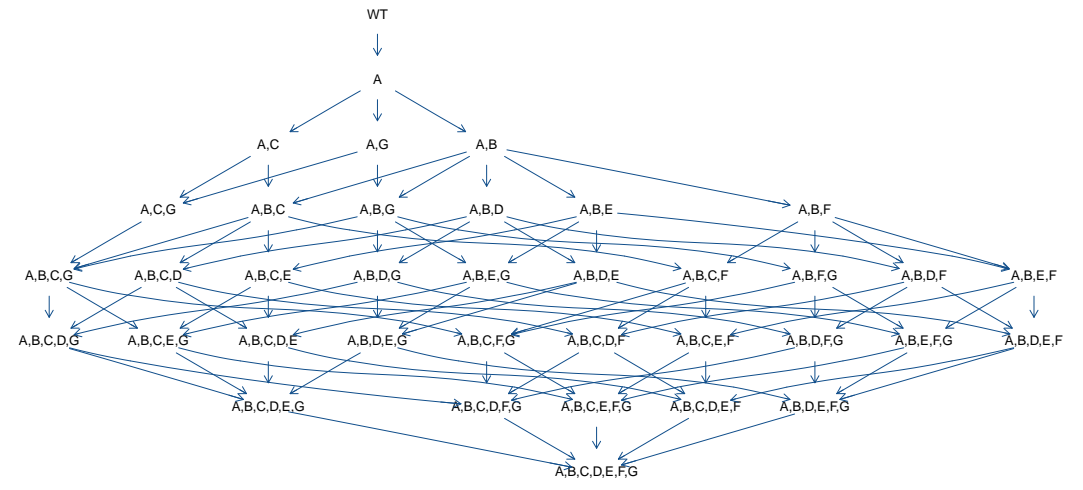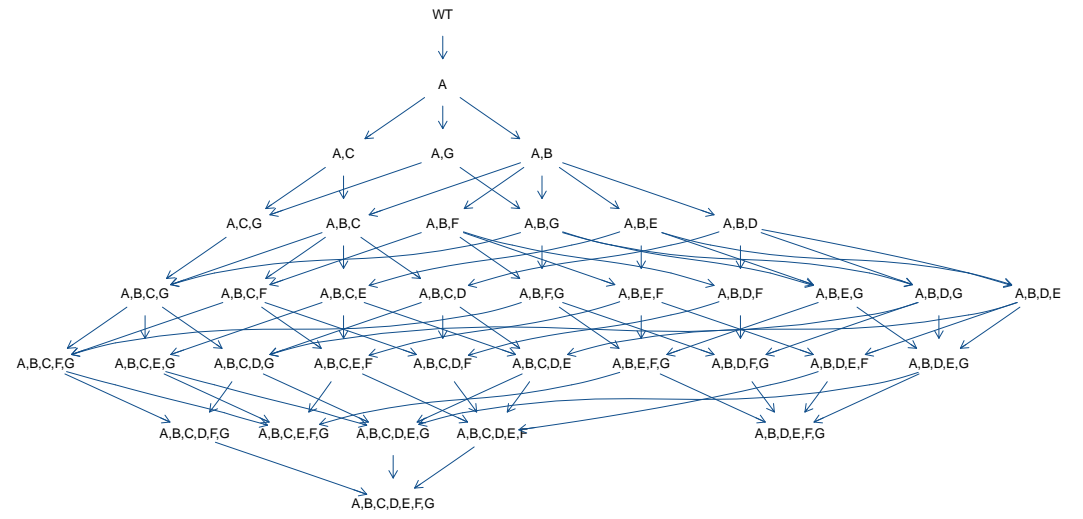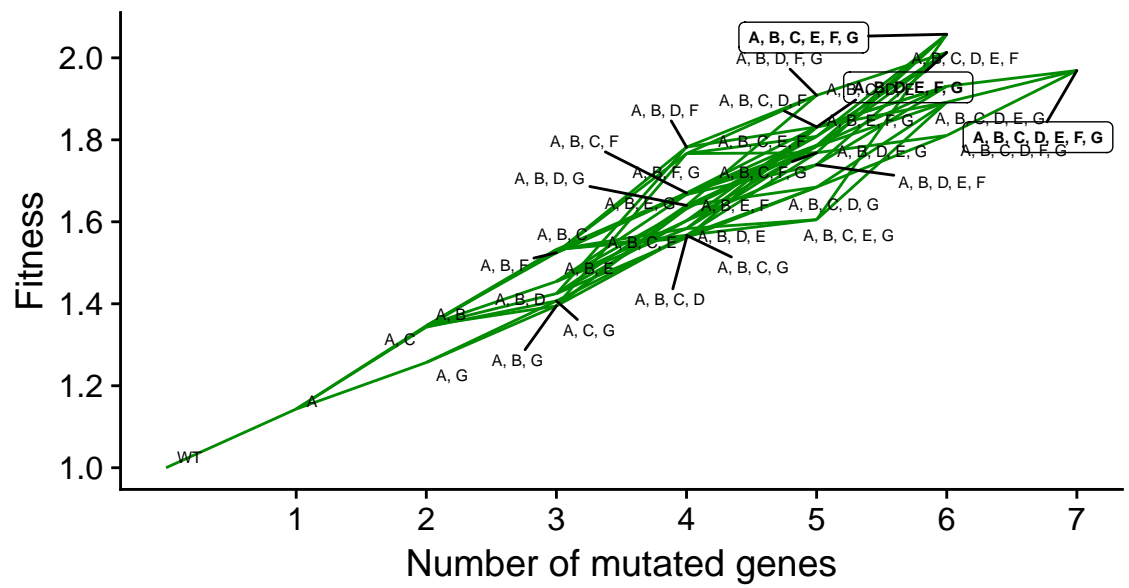

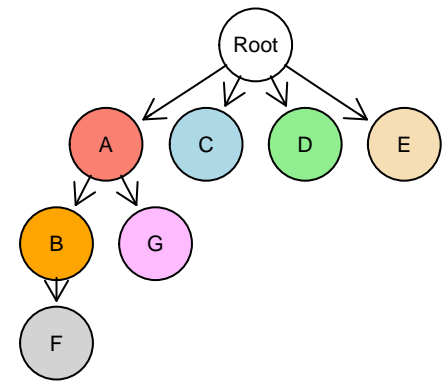

*ID* OfIKufVm9LrZy9VH  
*acc genotypes* 56  
*peaks no back* 8  
*removed edges* 27  
*prop rem edges* 0.182

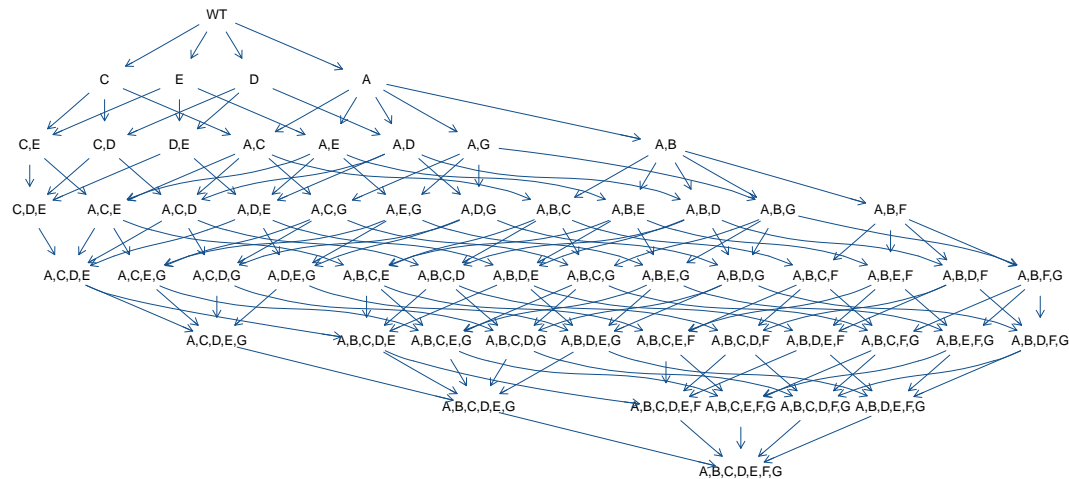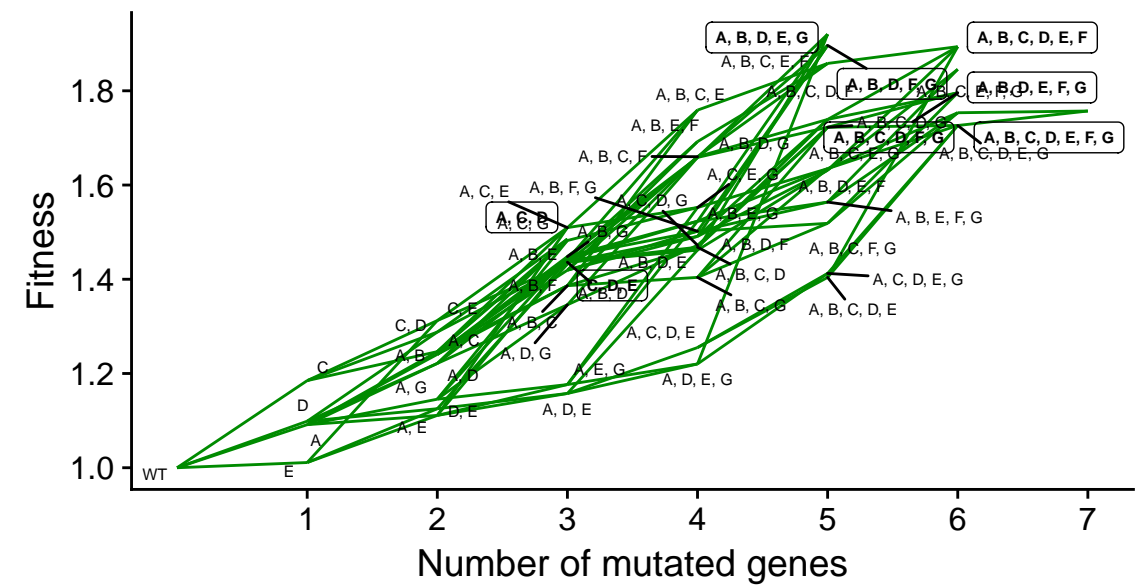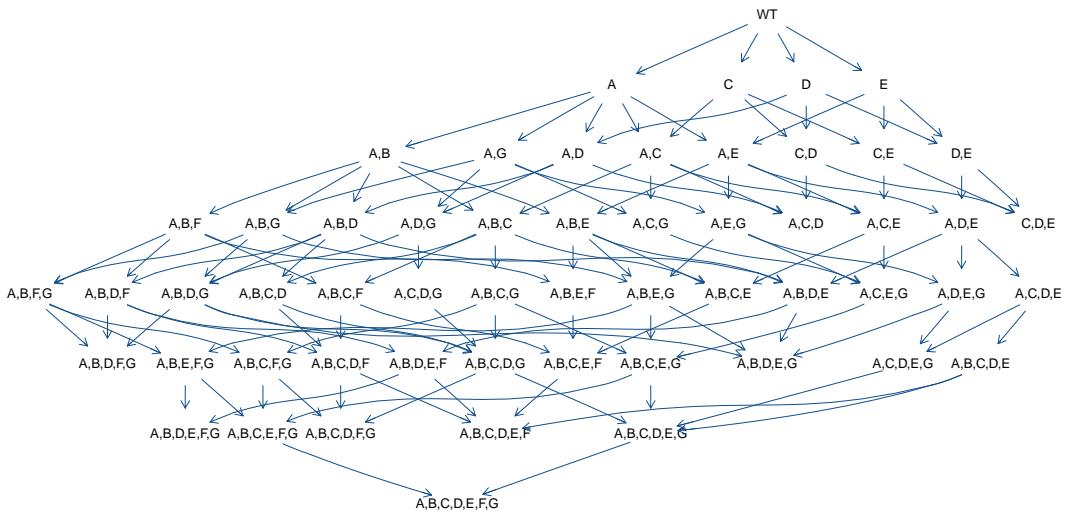

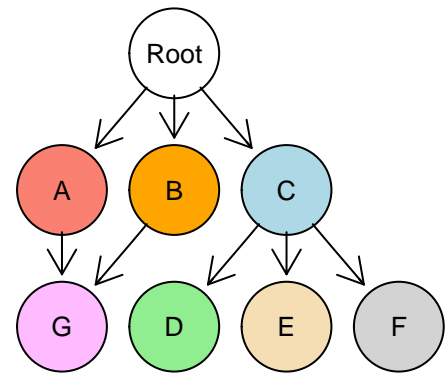

ID **OMDWvgSAoX1WSQy1**  
 acc genotypes **45**  
 peaks no back **3**  
 removed edges **13**  
 prop rem edges **0.118**

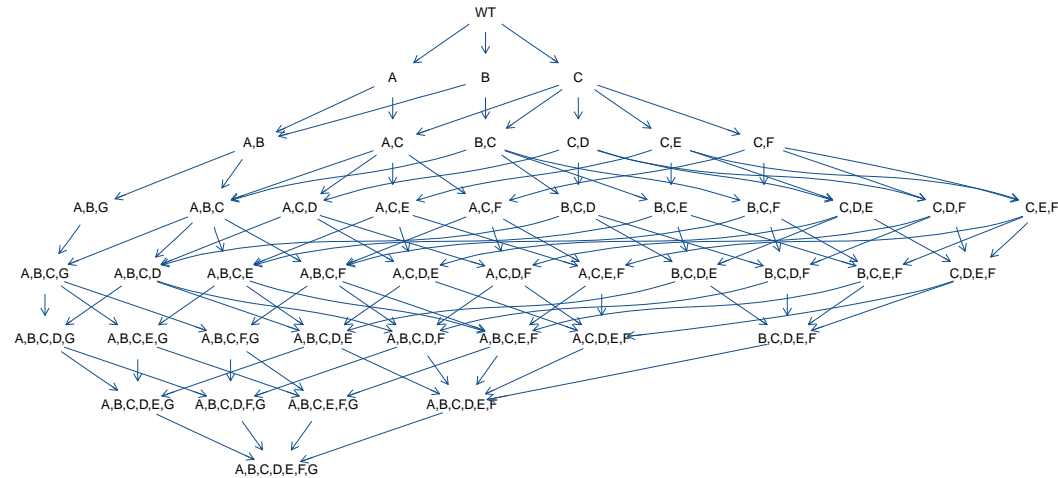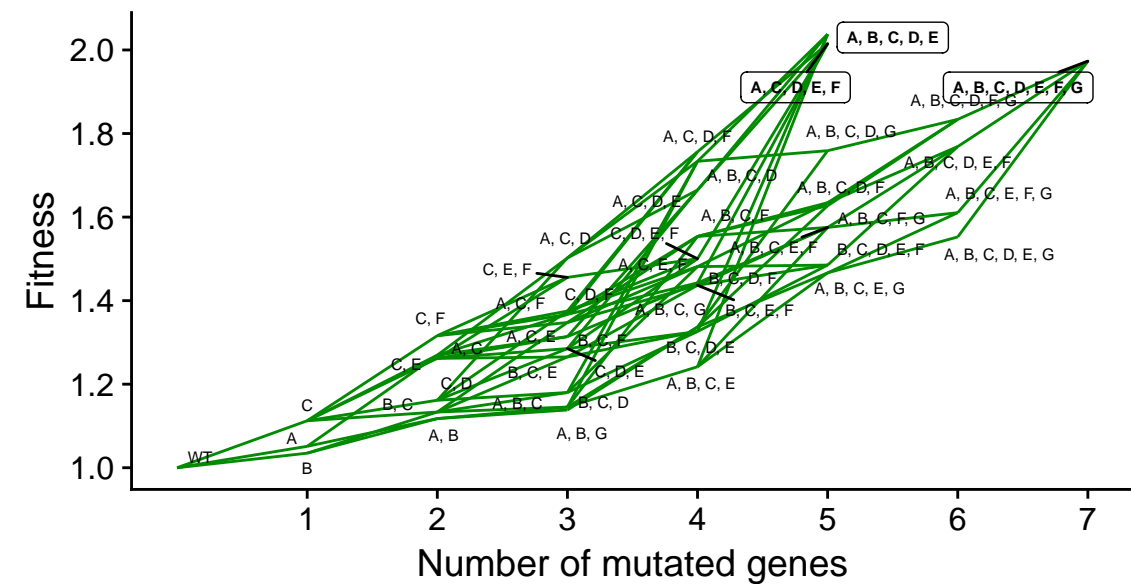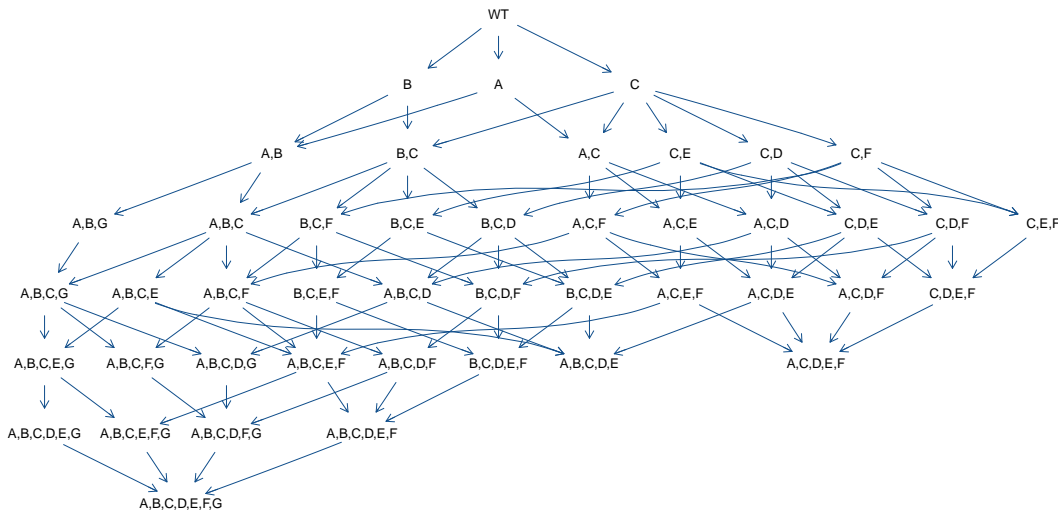

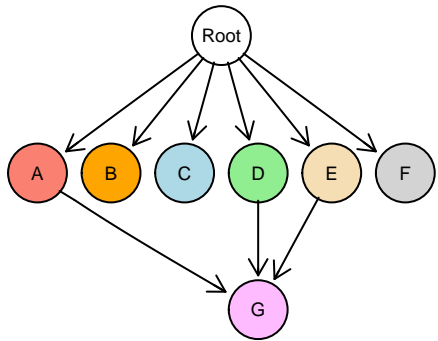

*ID* OWPmZOSW53BSDQD7  
*acc genotypes* 72  
*peaks no back* 9  
*removed edges* 44  
*prop rem edges* 0.208

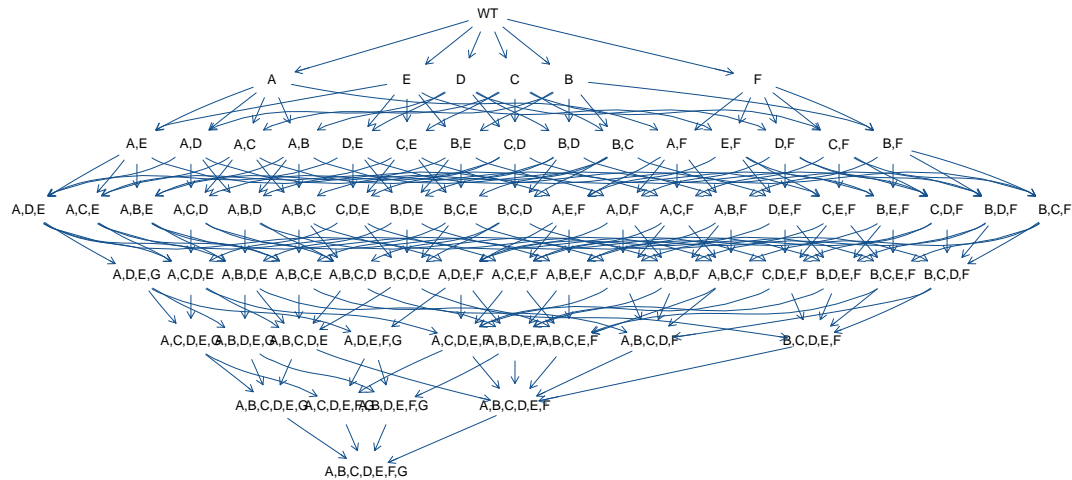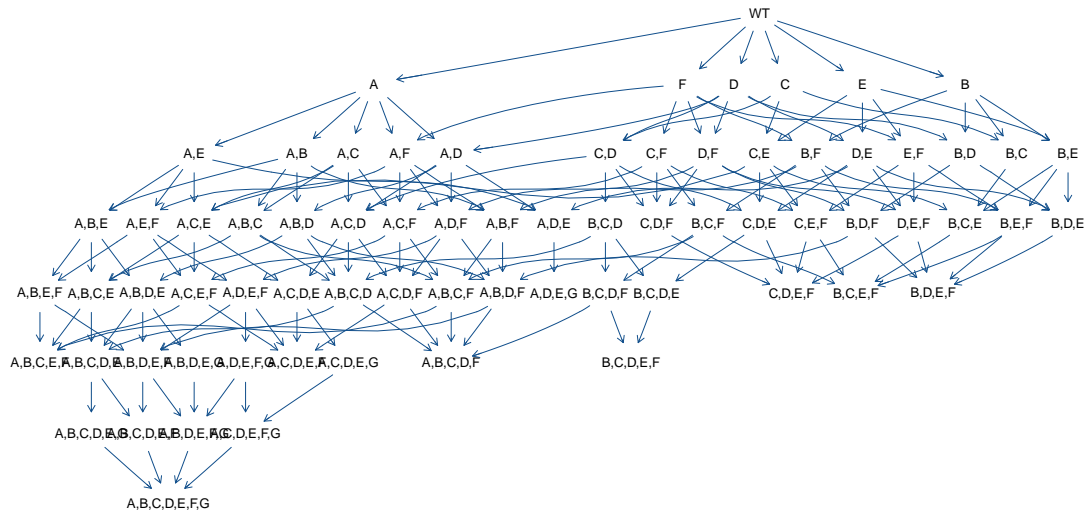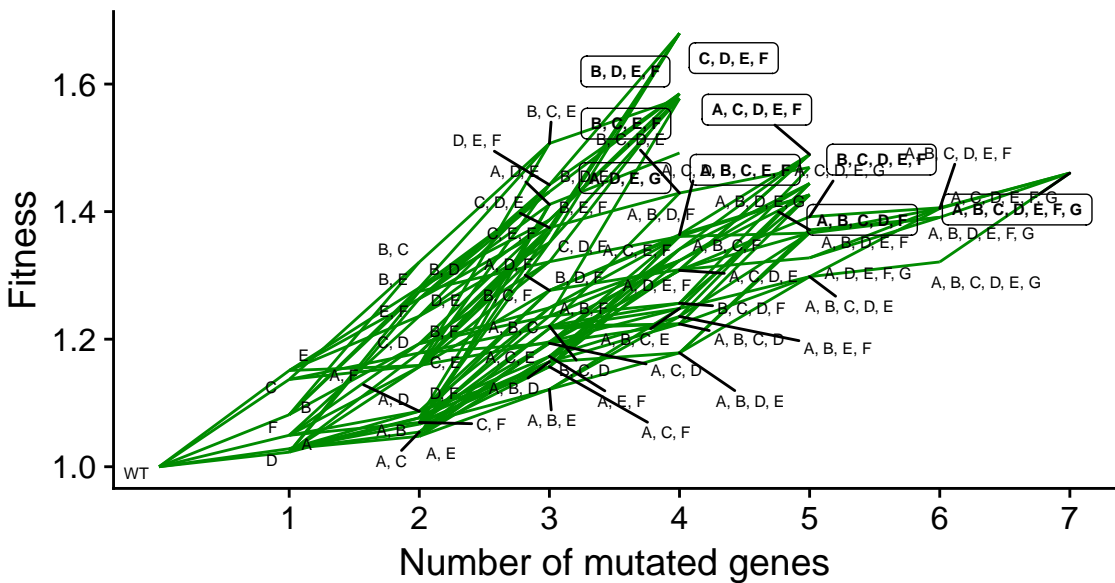

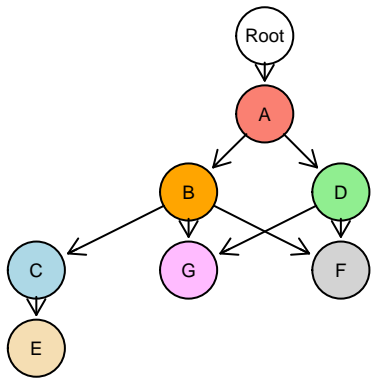

ID OyMB3UqWrH3e9QQY  
 acc genotypes 18  
 peaks no back 4  
 removed edges 3  
 prop rem edges 0.103

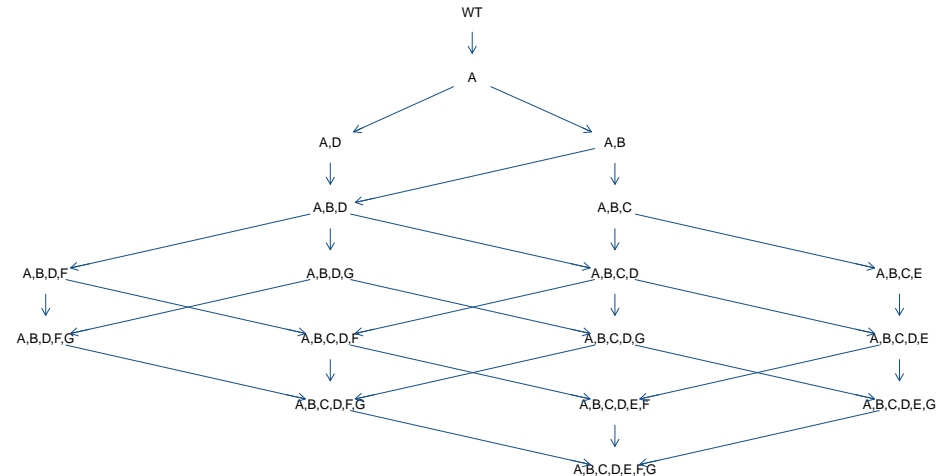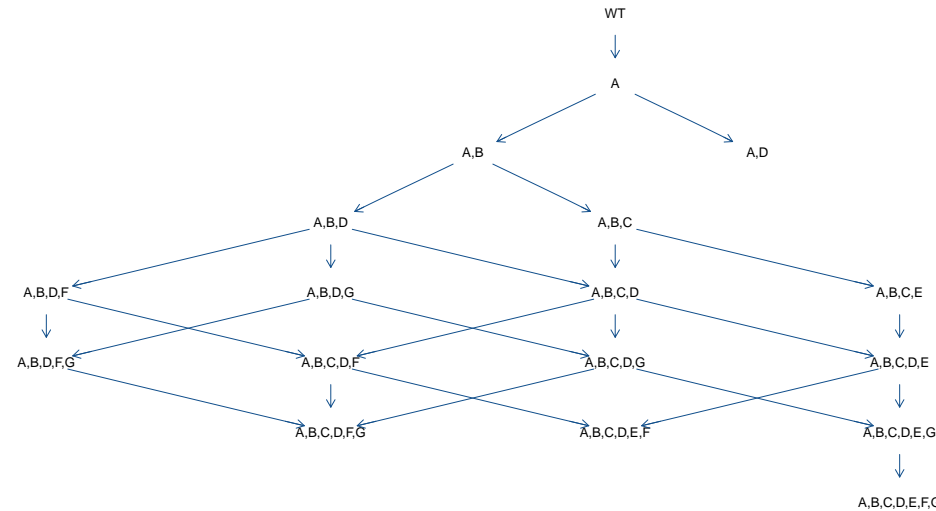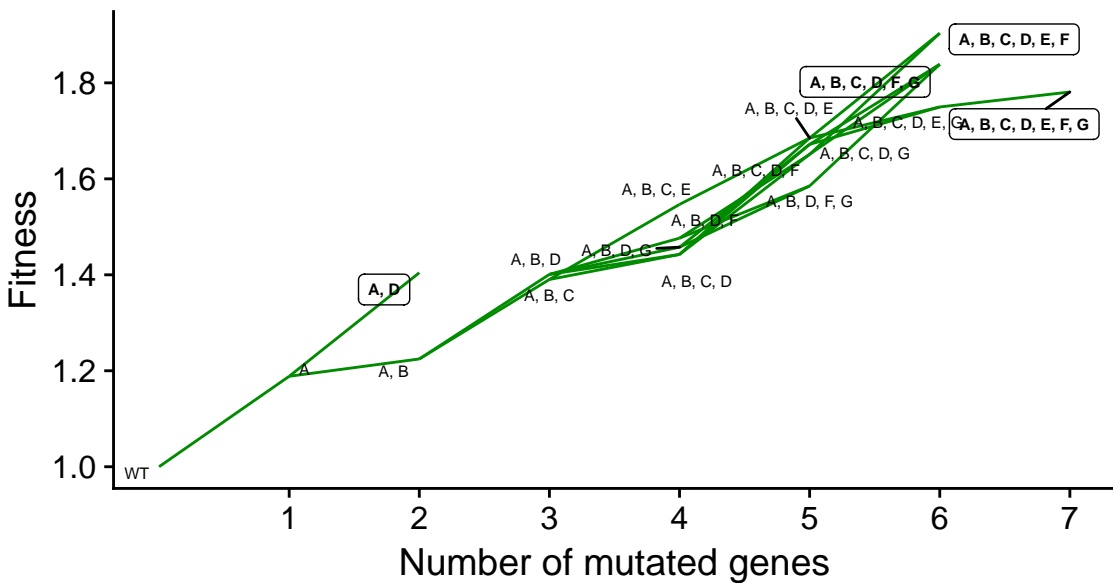



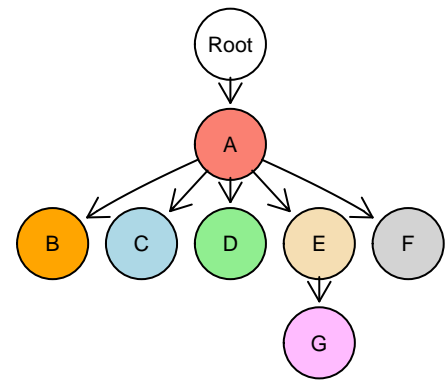

ID PKsB3Byp3SIOQBQf  
 acc genotypes 49  
 peaks no back 7  
 removed edges 20  
 prop rem edges 0.155

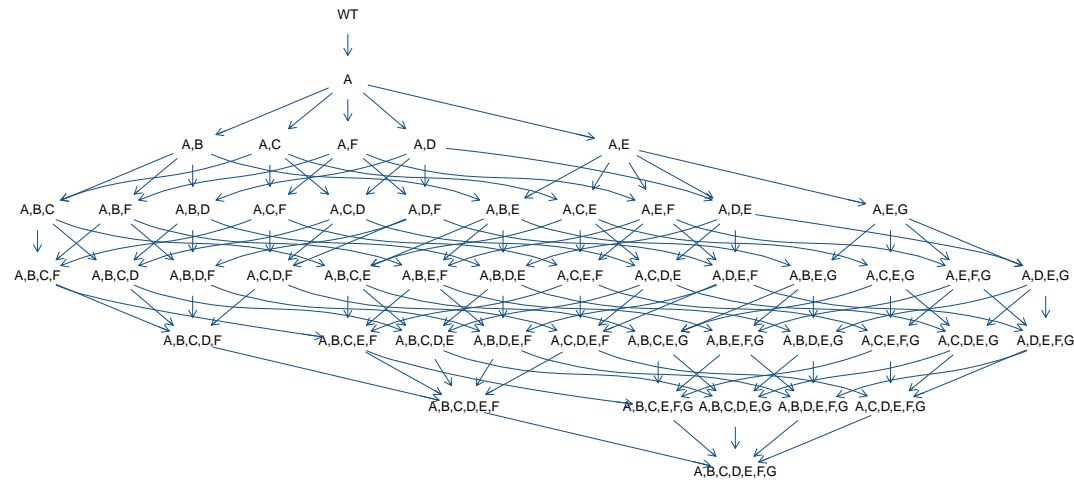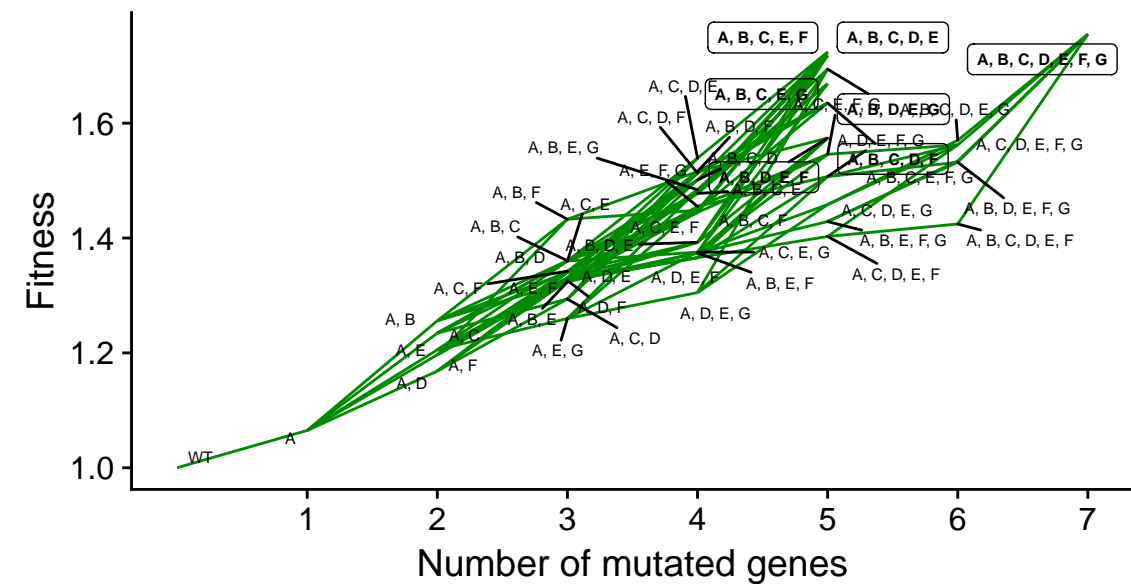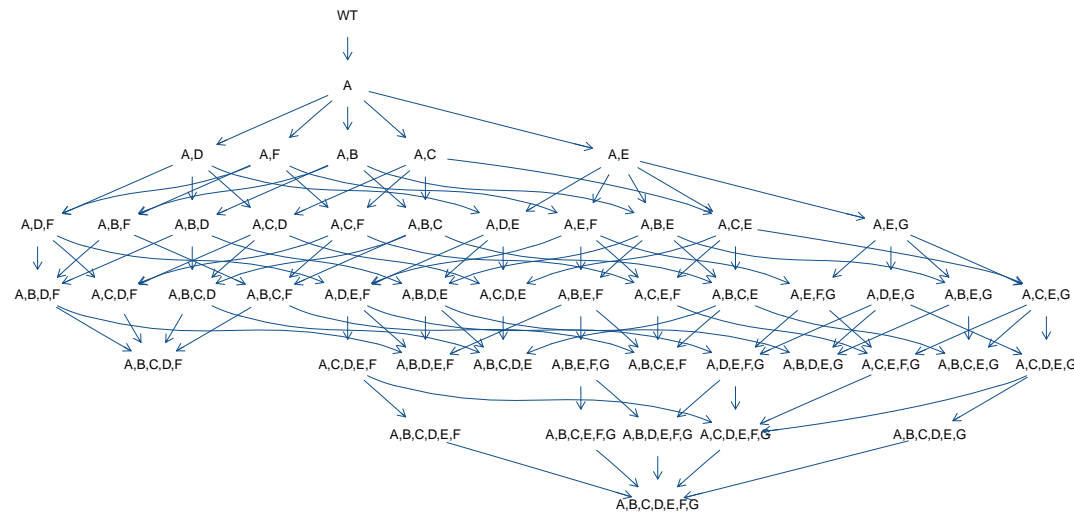

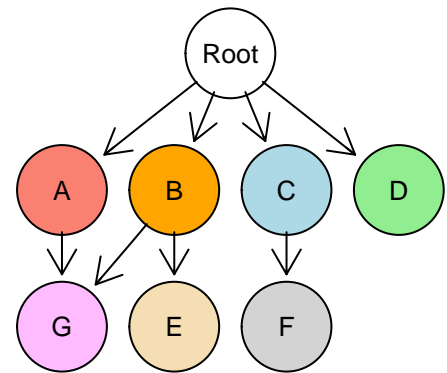

*ID* pP2pcse7FrkoEWZp  
*acc genotypes* 48  
*peaks no back* 6  
*removed edges* 20  
*prop rem edges* 0.172

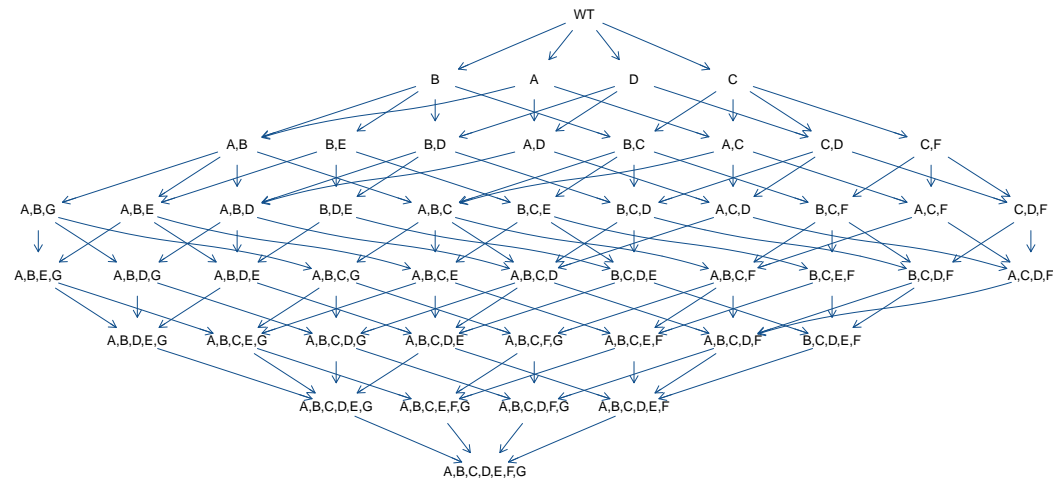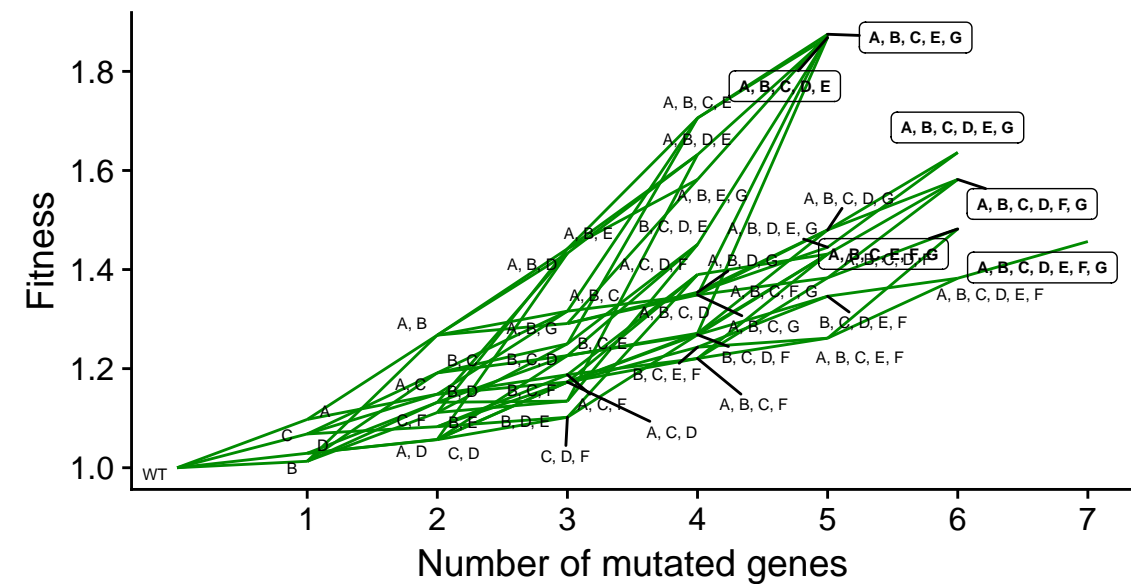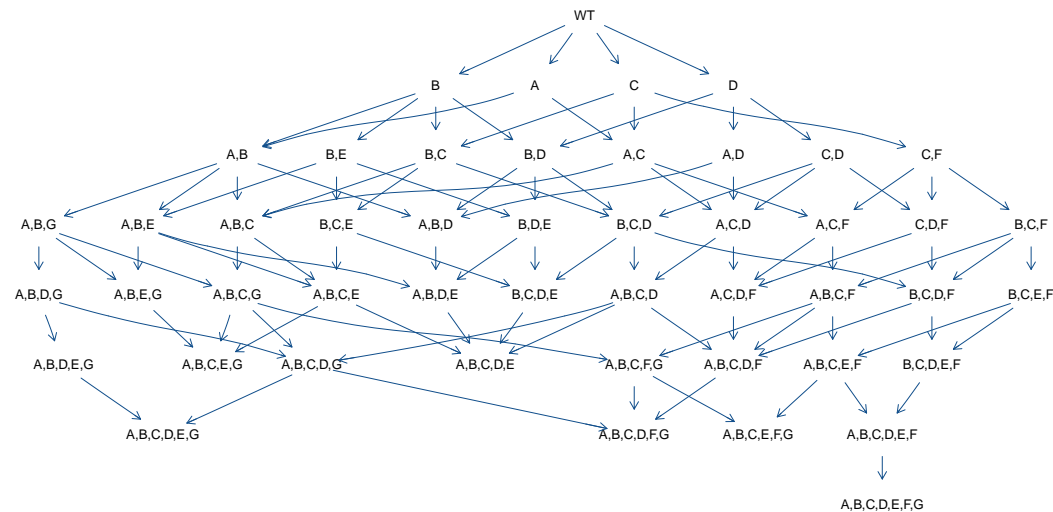



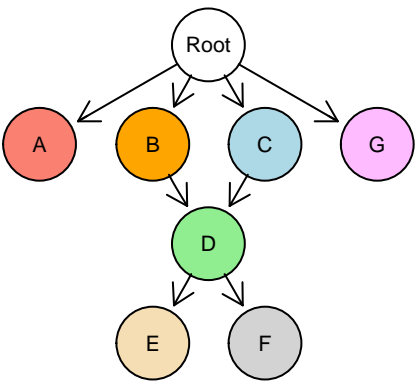

ID pSBATEcePfnX7JWh  
 acc genotypes 32  
 peaks no back 2  
 removed edges 7  
 prop rem edges 0.103

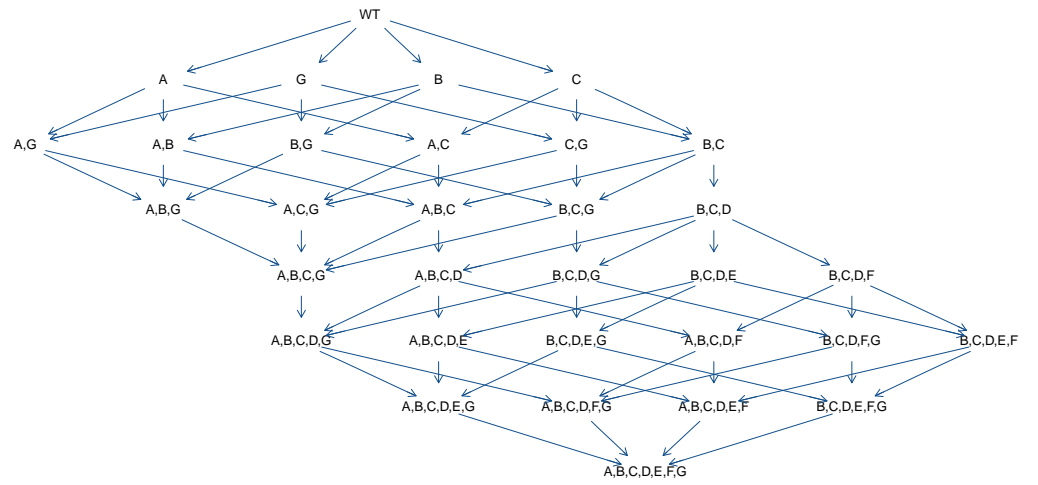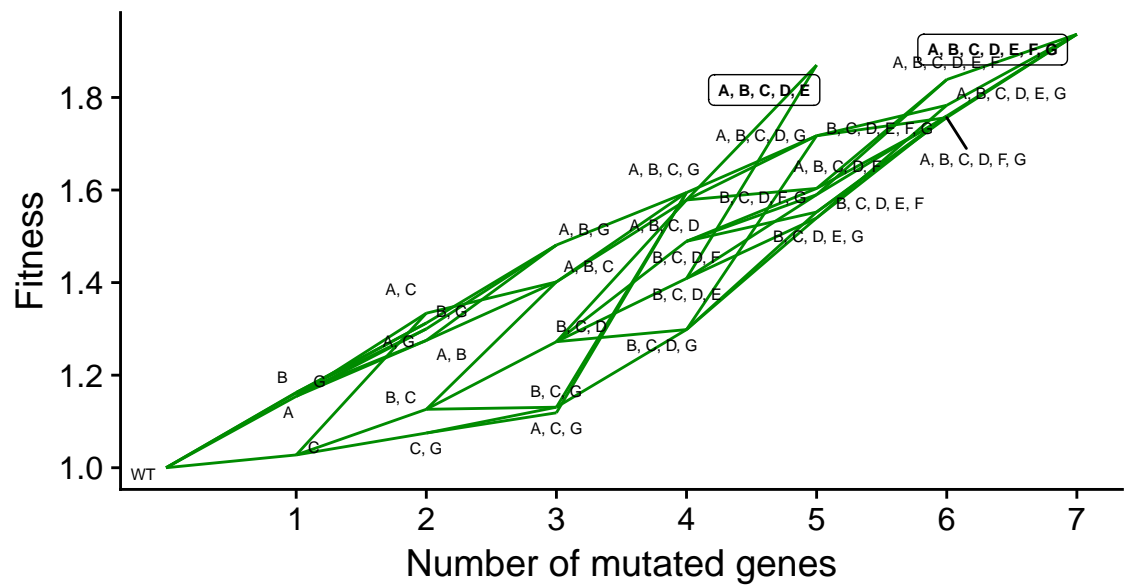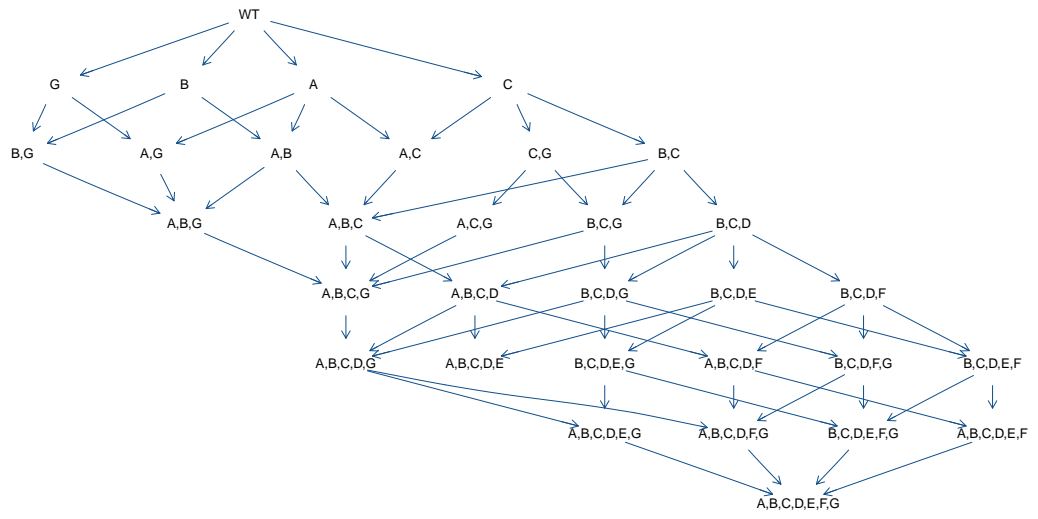

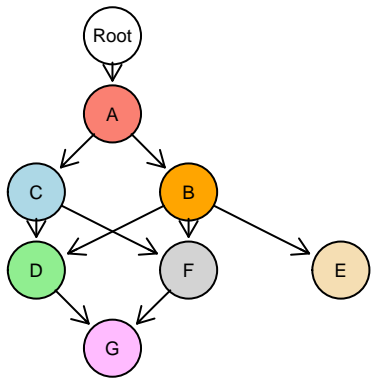

ID **pui6npZKf4iG9VmR**  
 acc genotypes **15**  
 peaks no back **3**  
 removed edges **3**  
 prop rem edges **0.136**

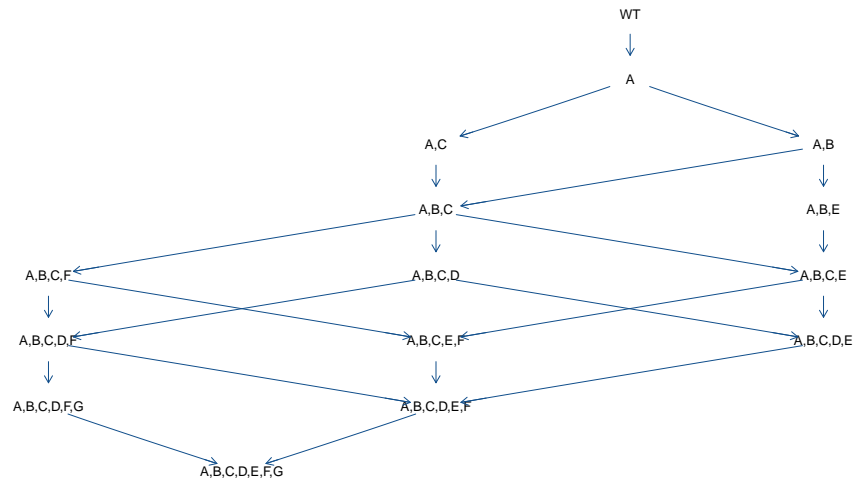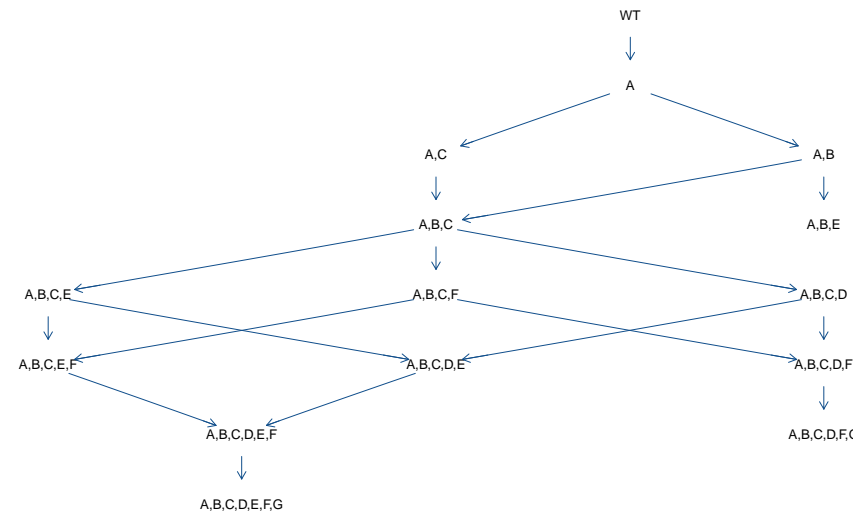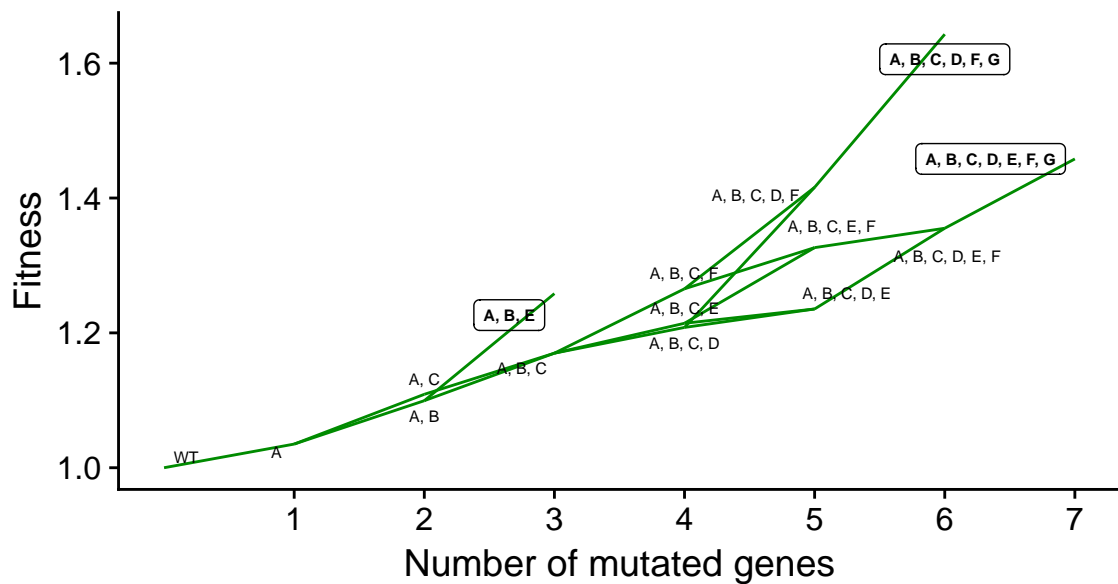

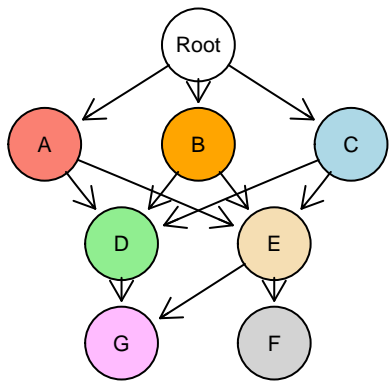

ID **Q7PLBKdNNwZTd7om**  
 acc genotypes **15**  
 peaks no back 2  
 removed edges 2  
 prop rem edges 0.091

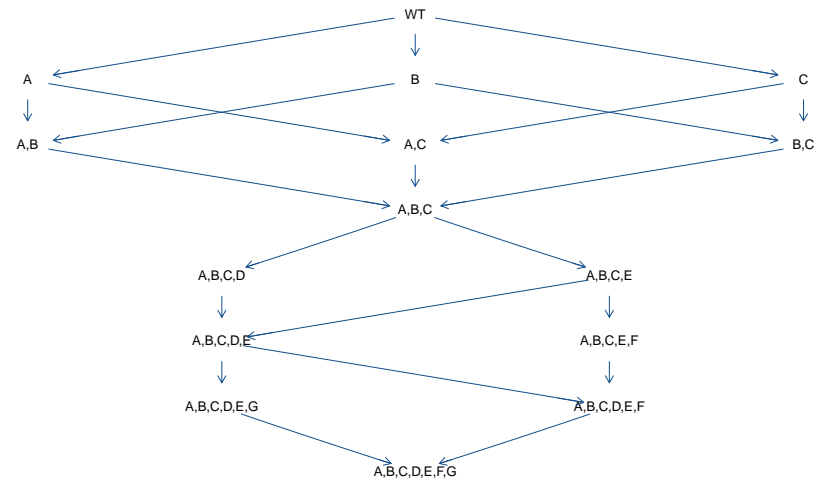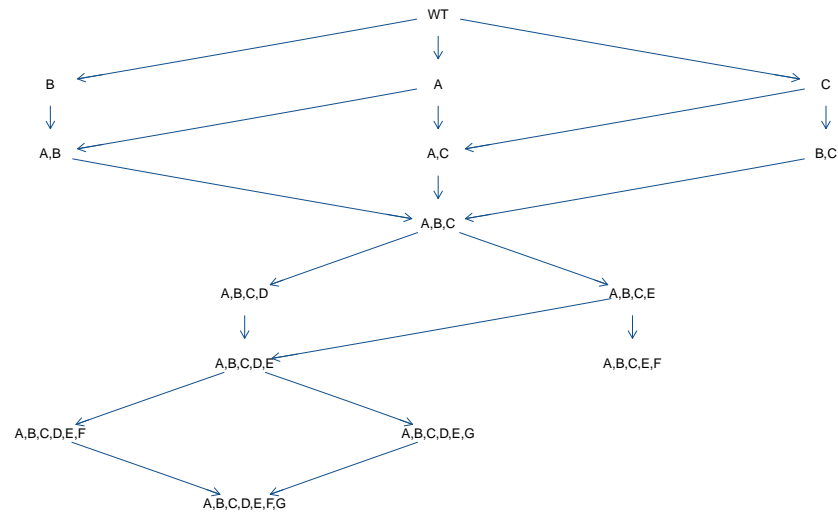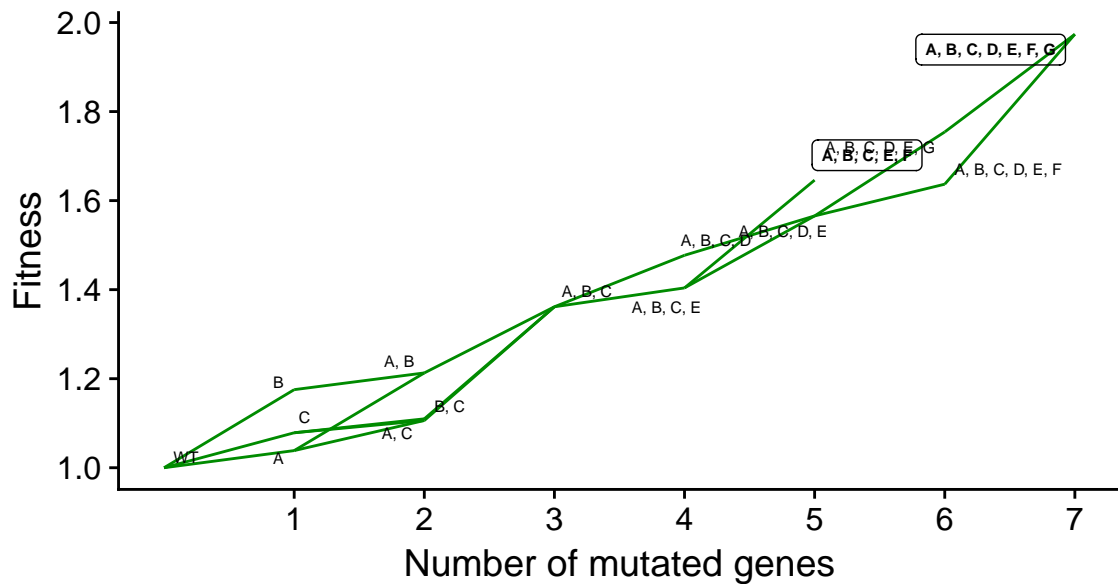

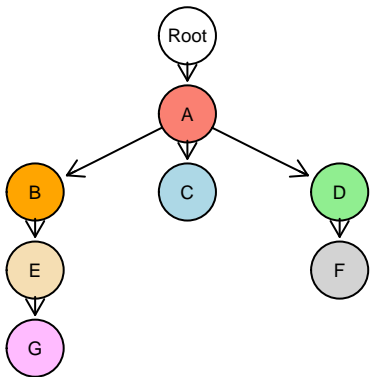

ID **qEpRgGAzFDFL2rE5**  
 acc genotypes **25**  
 peaks no back **3**  
 removed edges **10**  
 prop rem edges **0.213**

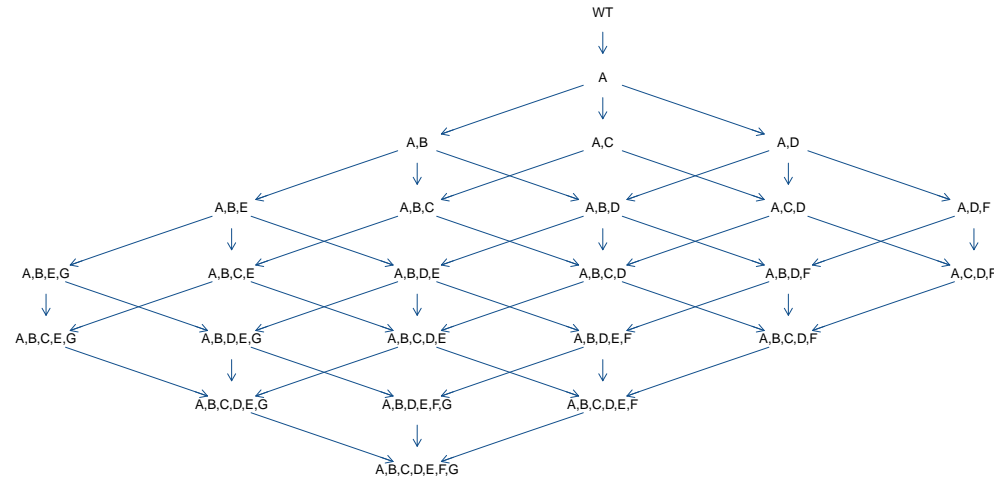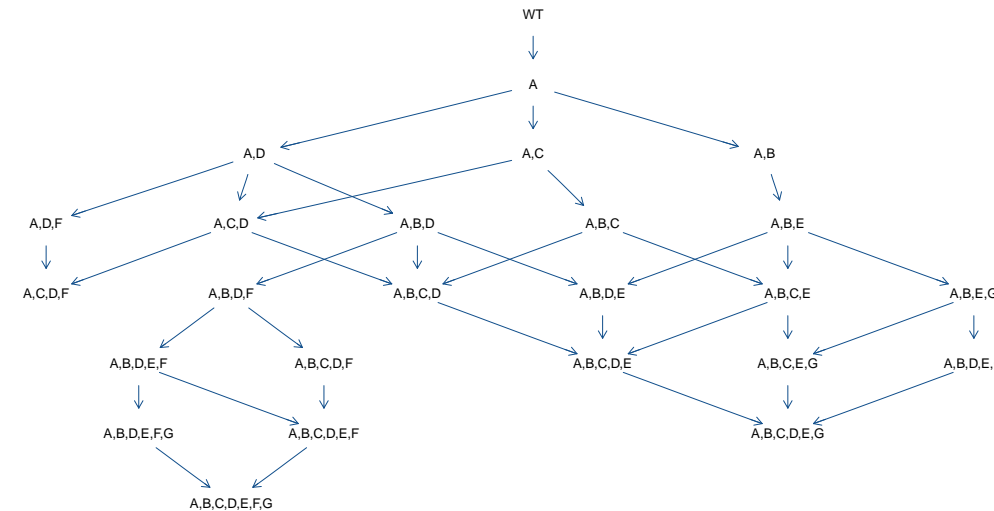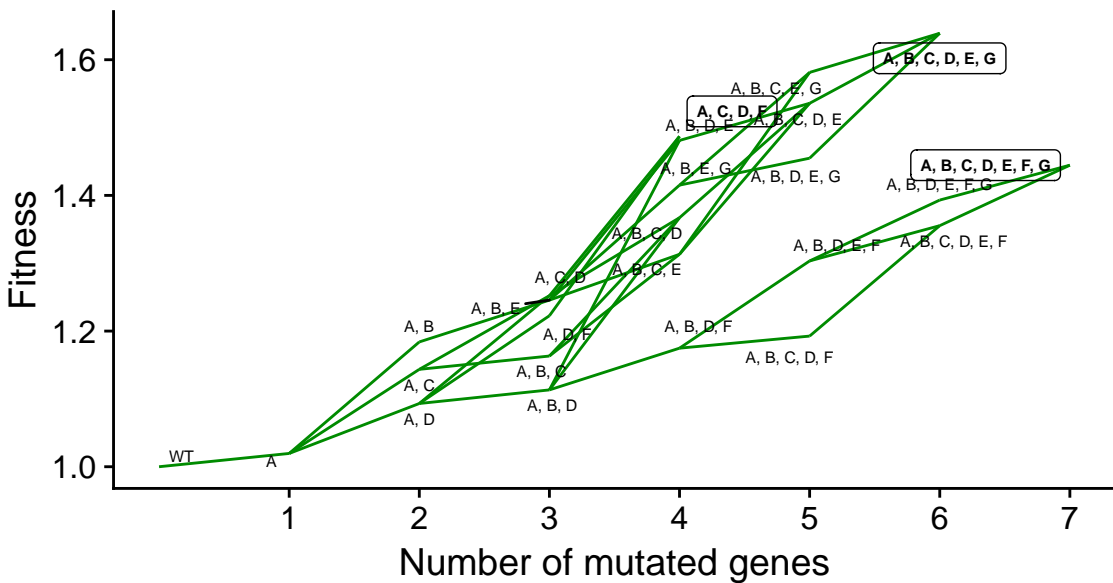

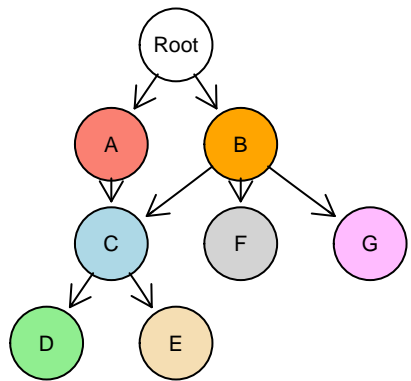

ID qEvXADpjSKIVHqcX  
 acc genotypes 26  
 peaks no back 2  
 removed edges 4  
 prop rem edges 0.078

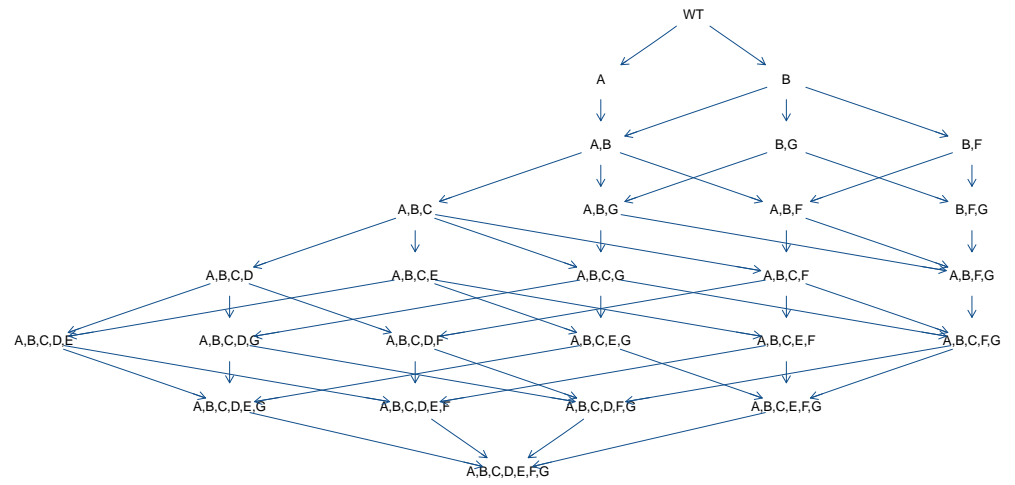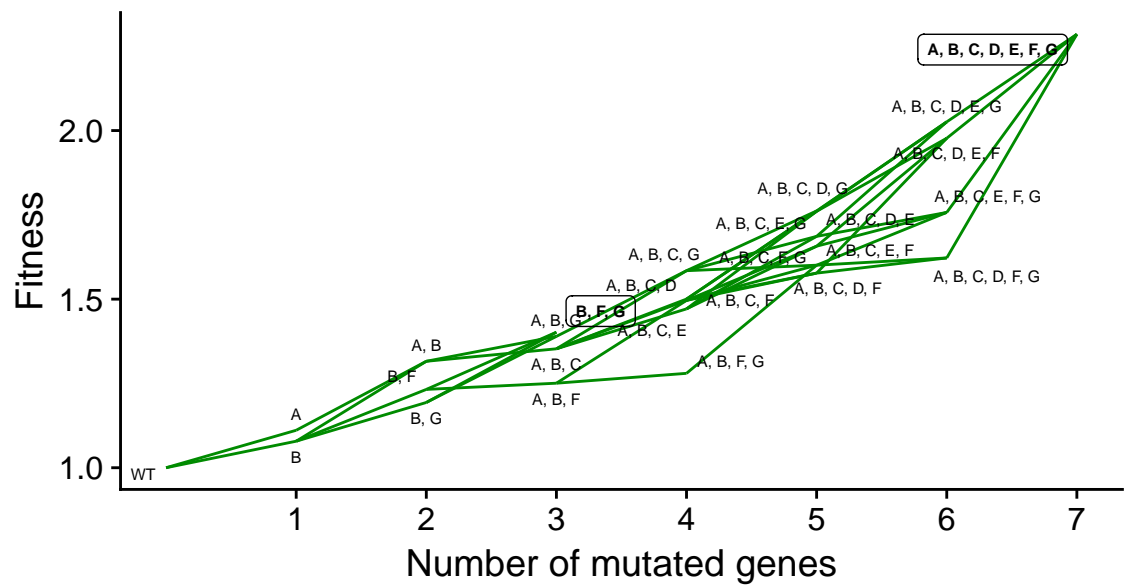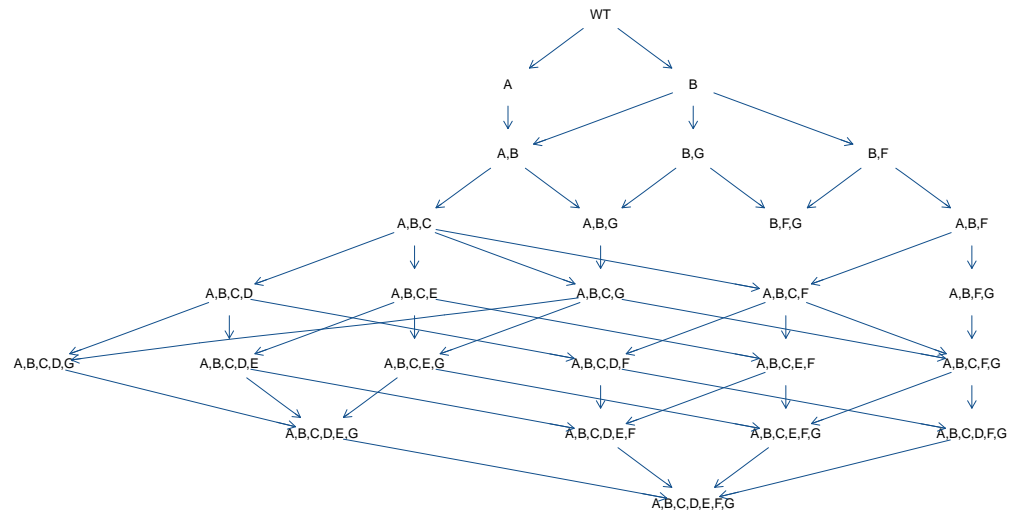



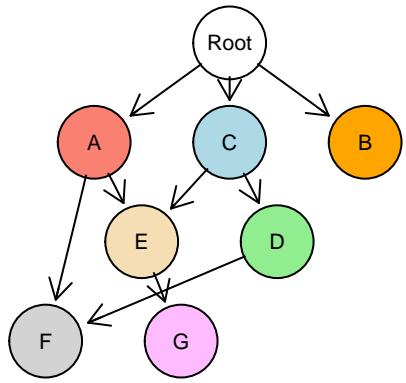

ID **qp7i3jRVfJ15Ghst**  
 acc genotypes **26**  
 peaks no back **6**  
 removed edges **12**  
 prop rem edges **0.245**

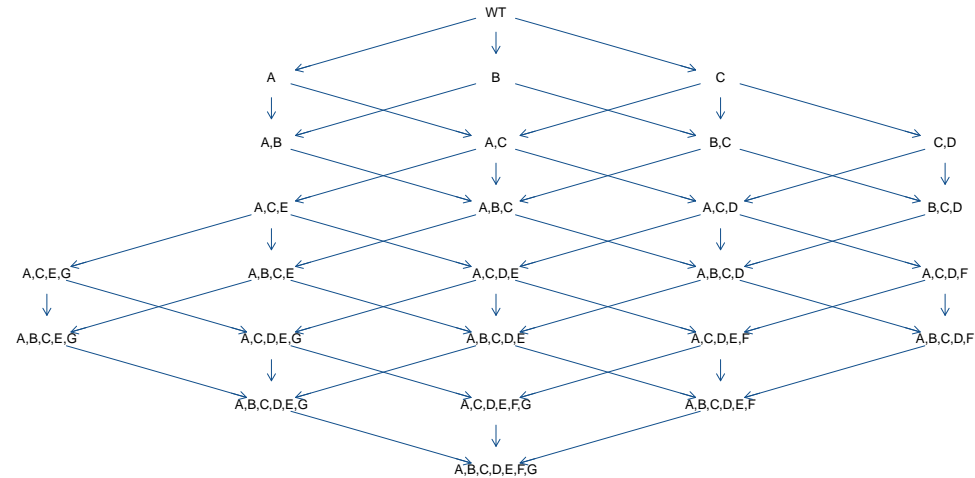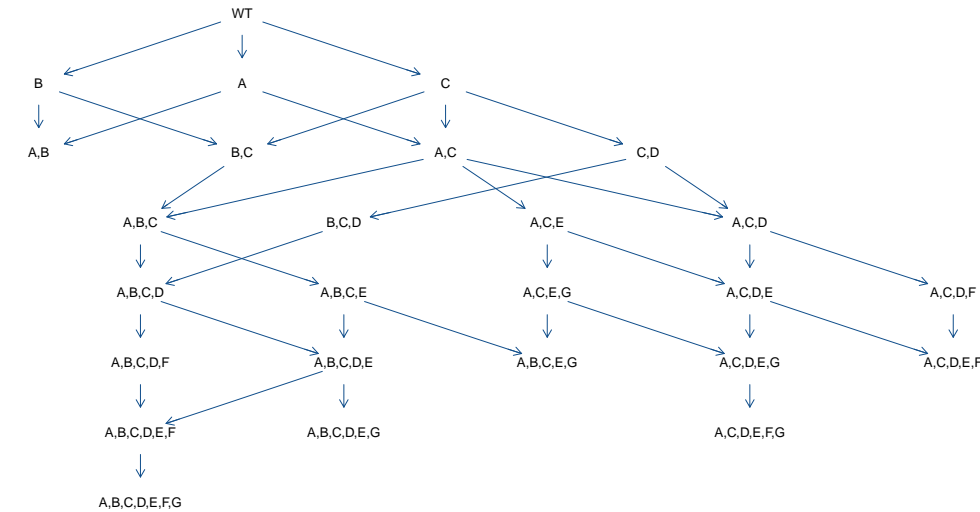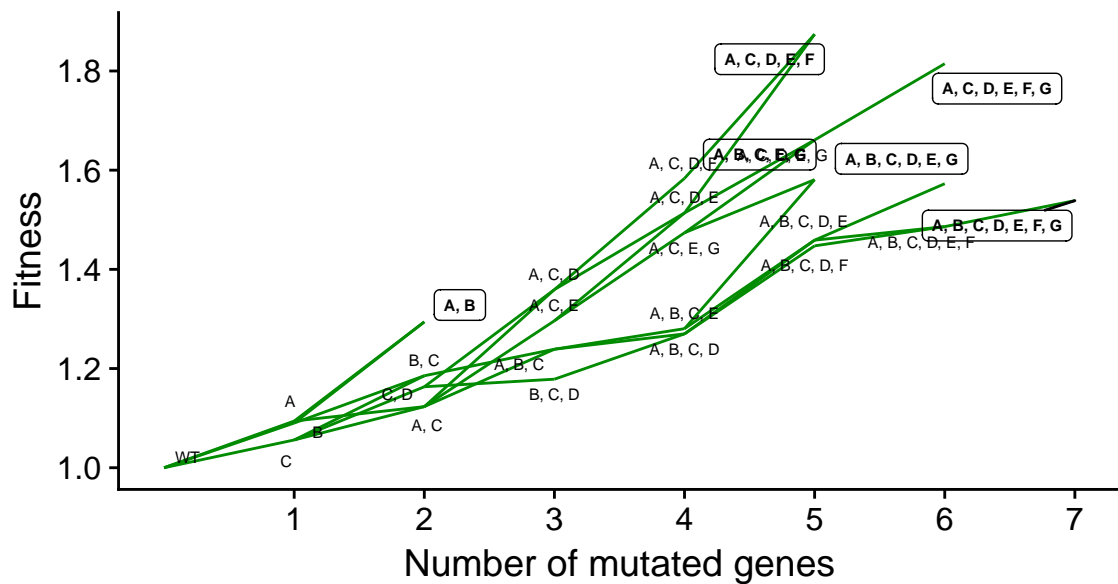



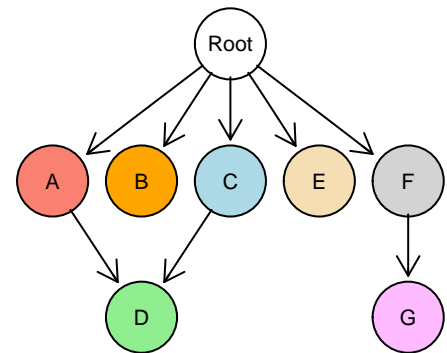

ID **qUS7LZwsUxmyH3in**  
 acc genotypes **60**  
 peaks no back **7**  
 removed edges **32**  
 prop rem edges **0.2**

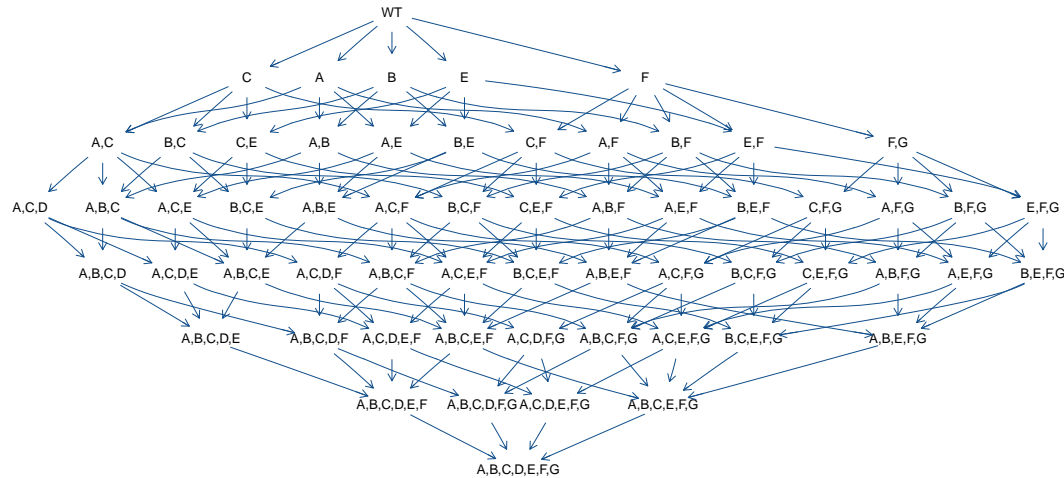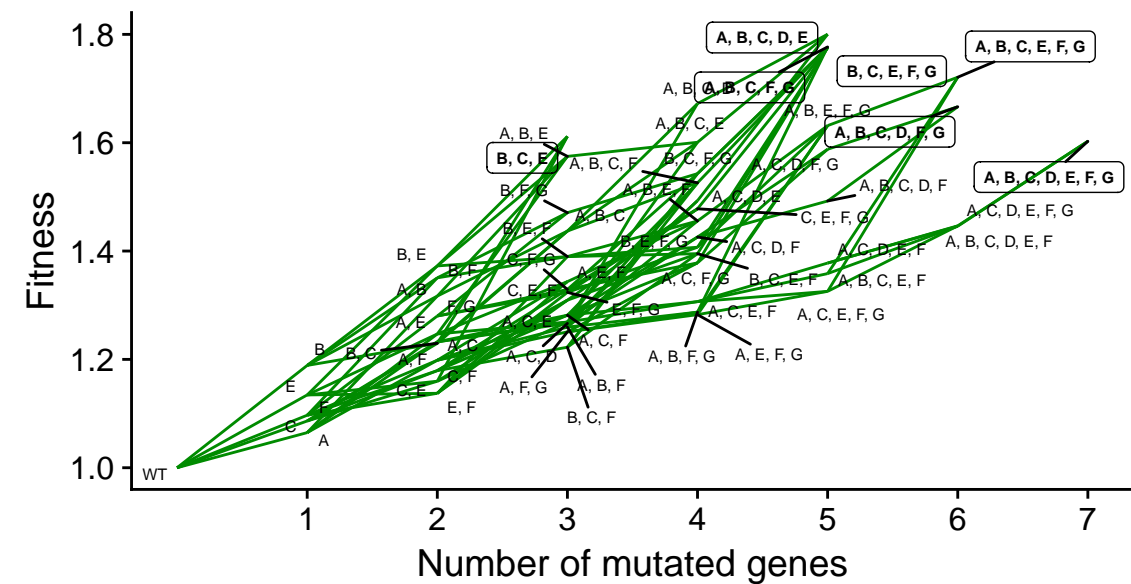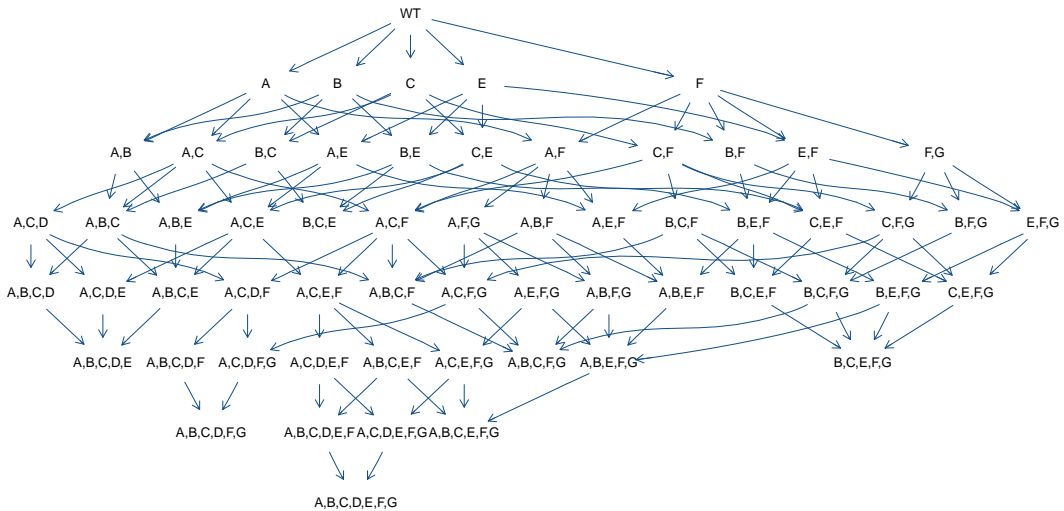

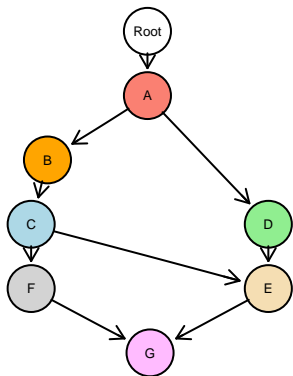

ID **R102qzAOOheDkzBdz**  
 acc genotypes **12**  
 peaks no back **2**  
 removed edges **1**  
 prop rem edges **0.067**

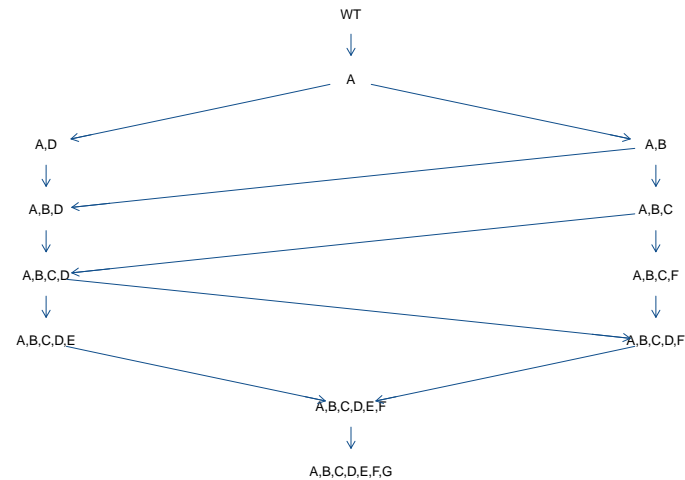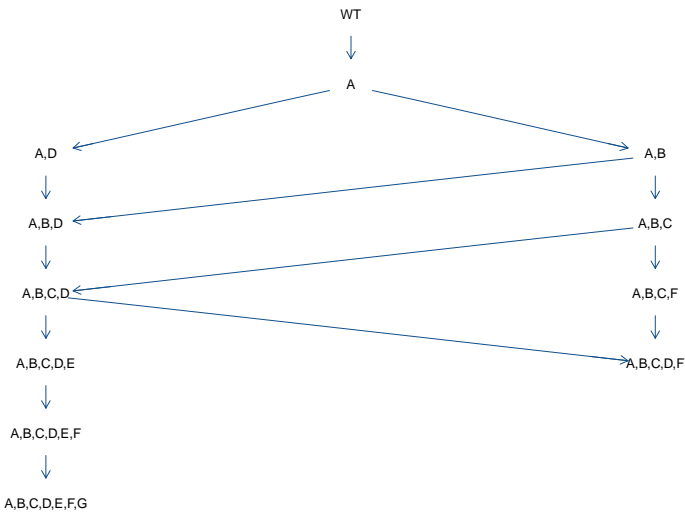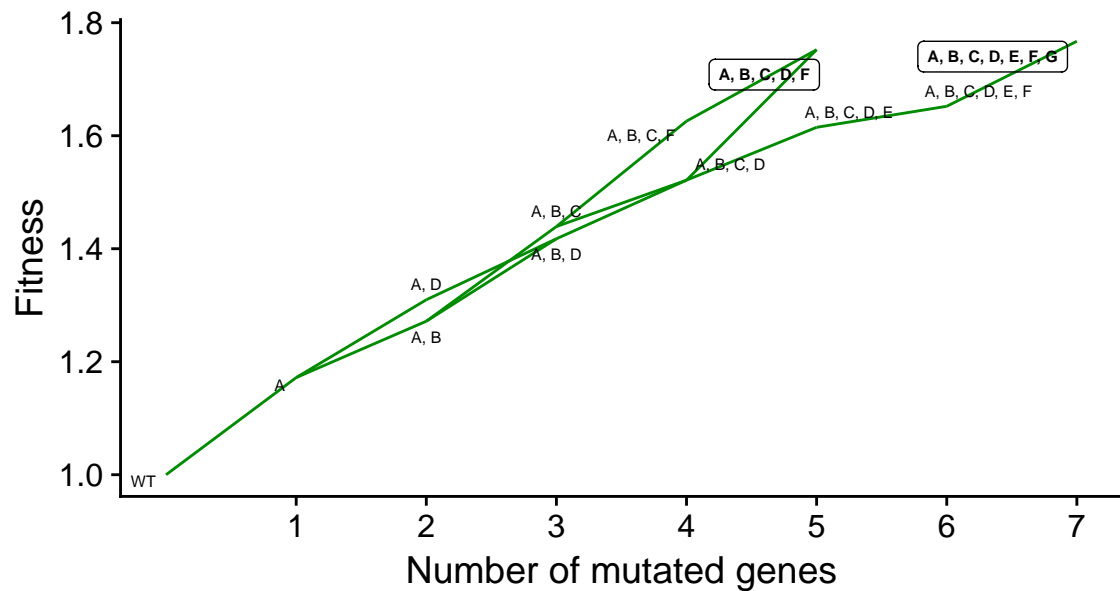



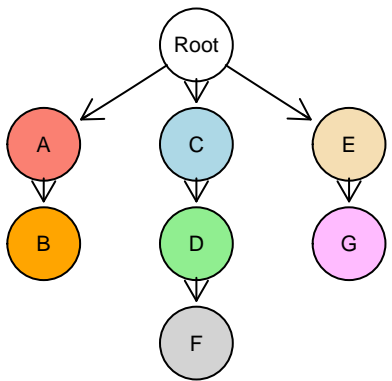

ID **ScvT9EQPUJ5Ak10em**  
 acc genotypes **36**  
 peaks no back **2**  
 removed edges **8**  
 prop rem edges **0.107**

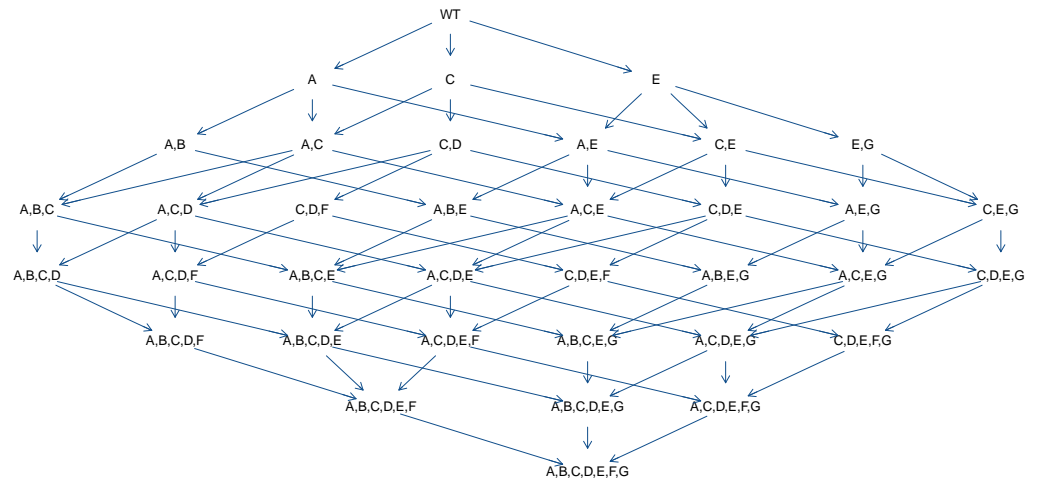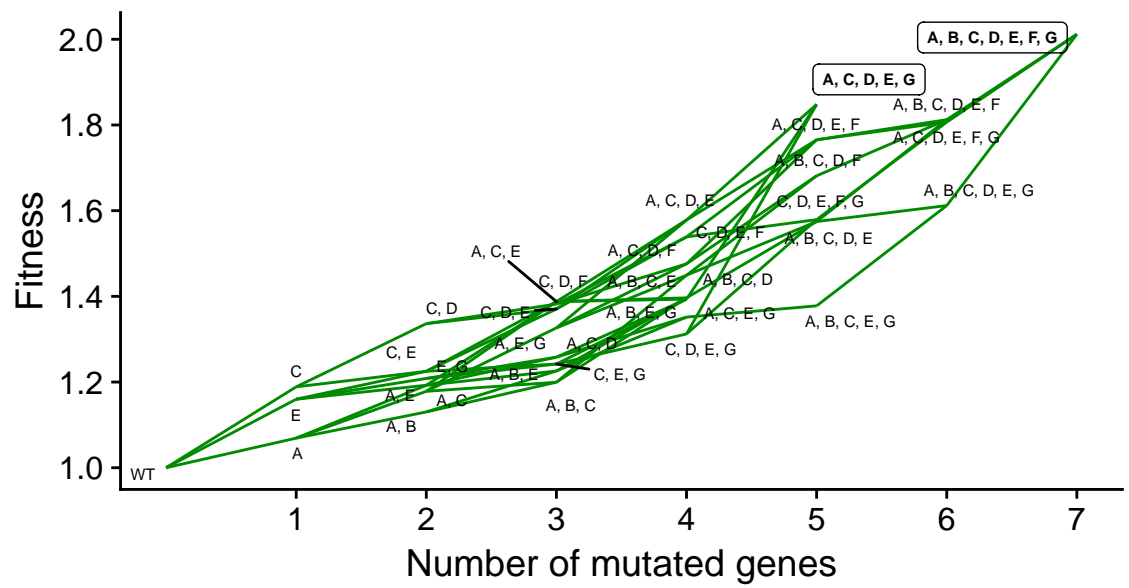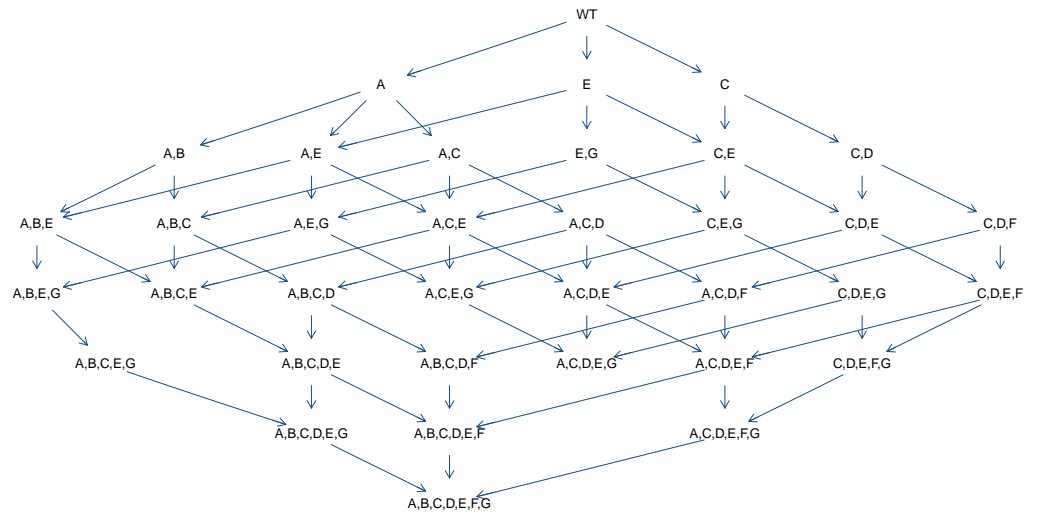

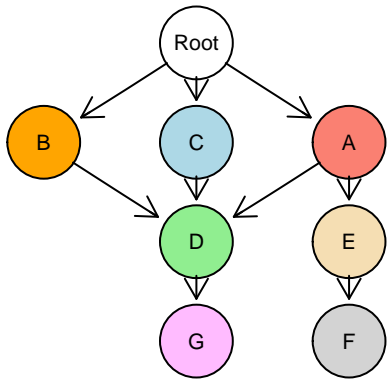

ID **sLsugLzPftgJ7O1e**  
 acc genotypes **22**  
 peaks no back **2**  
 removed edges **3**  
 prop rem edges **0.079**

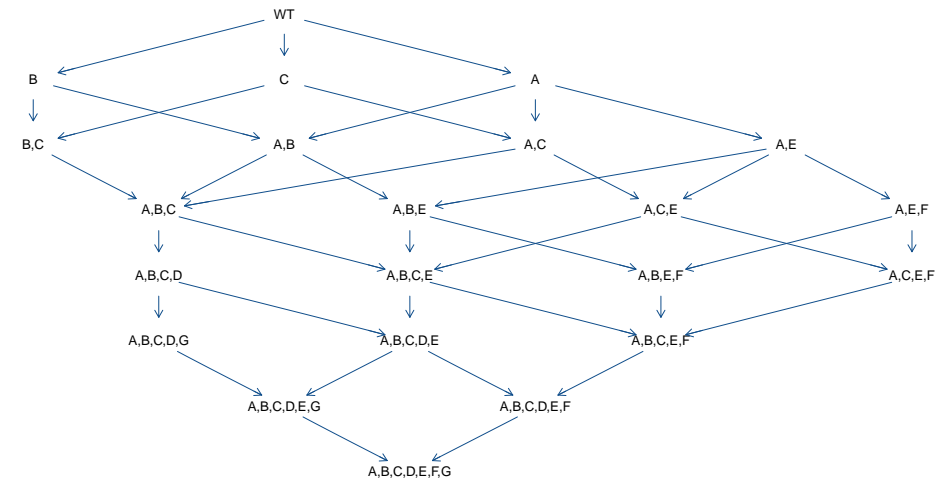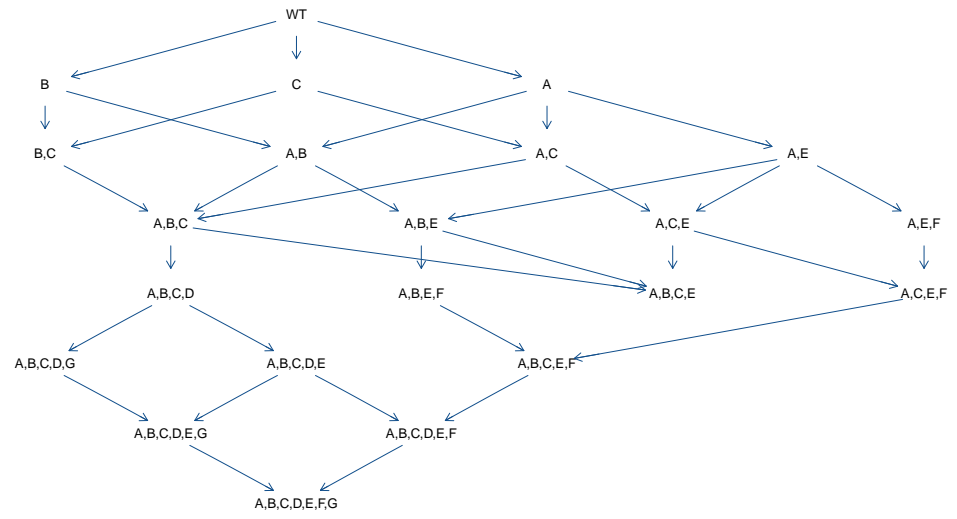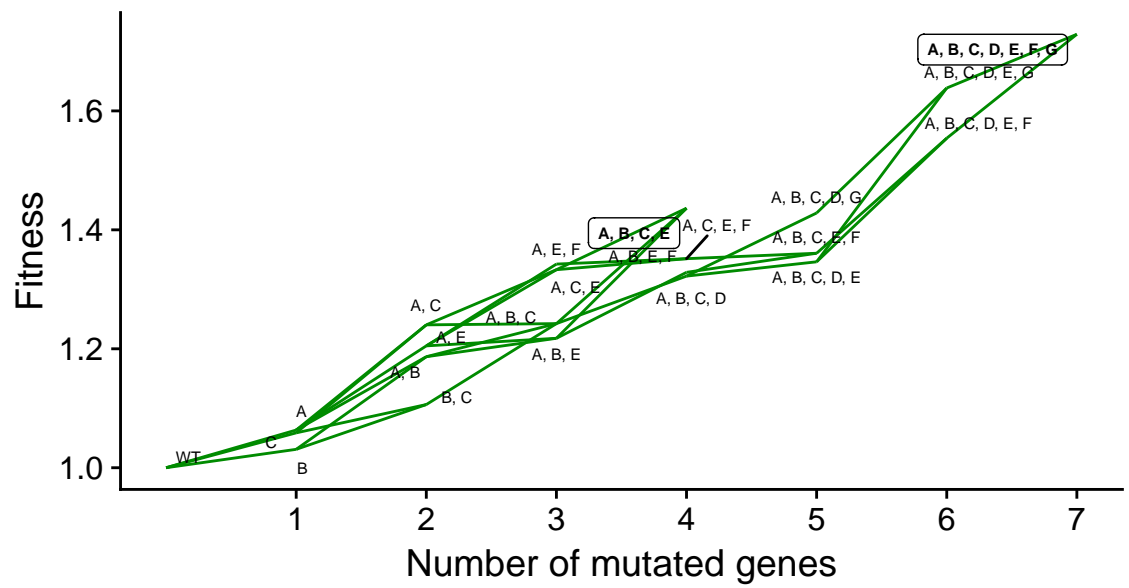

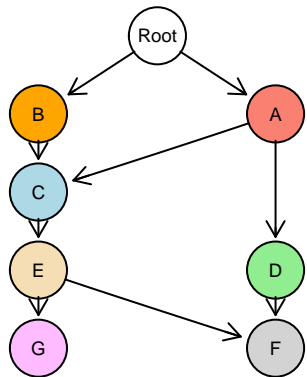

ID SnRRRjceljqckEUKX  
 acc genotypes 14  
 peaks no back 3  
 removed edges 2  
 prop rem edges 0.105

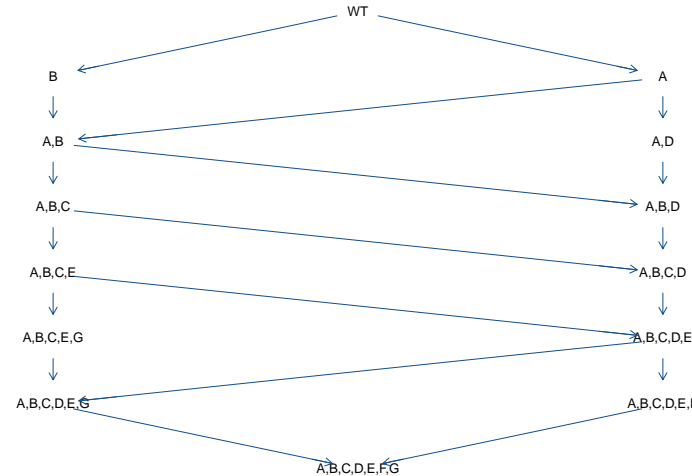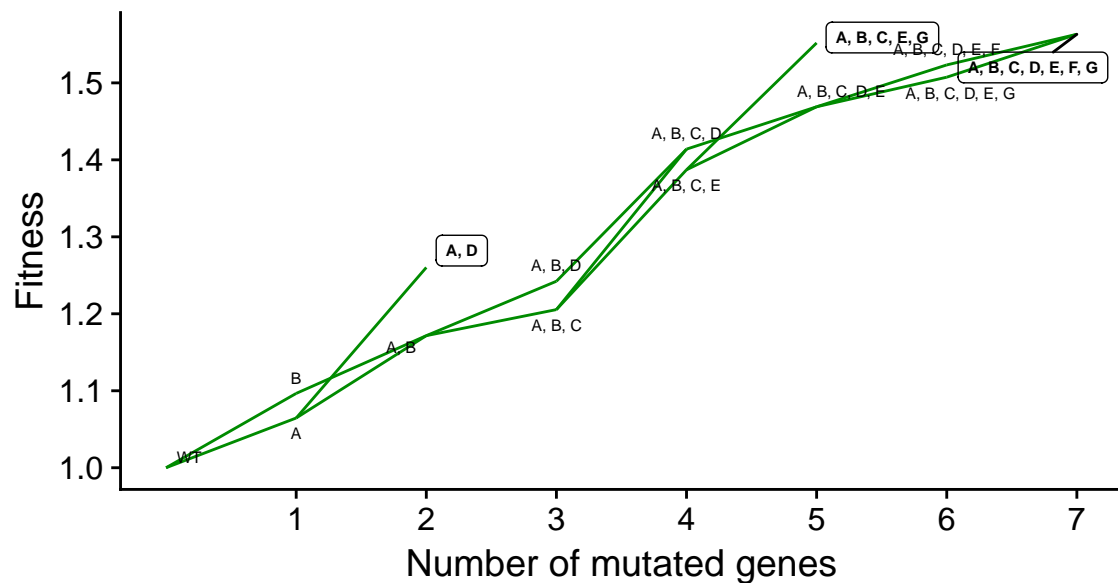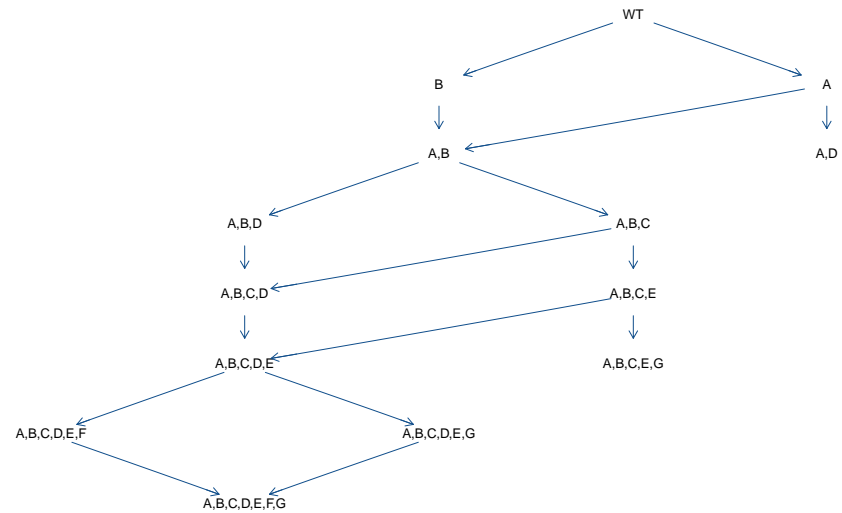



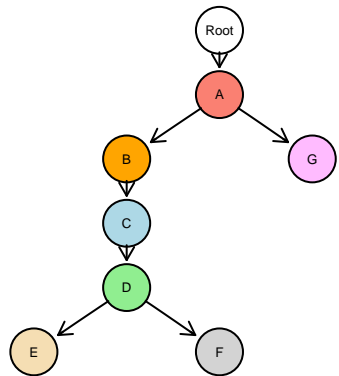

ID **t2kQyfWf61wq10313**  
 acc genotypes **15**  
 peaks no back **2**  
 removed edges **2**  
 prop rem edges **0.091**

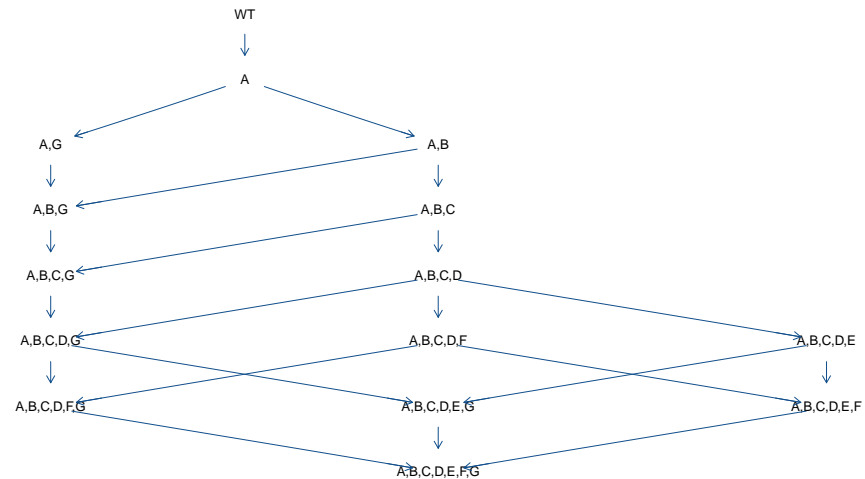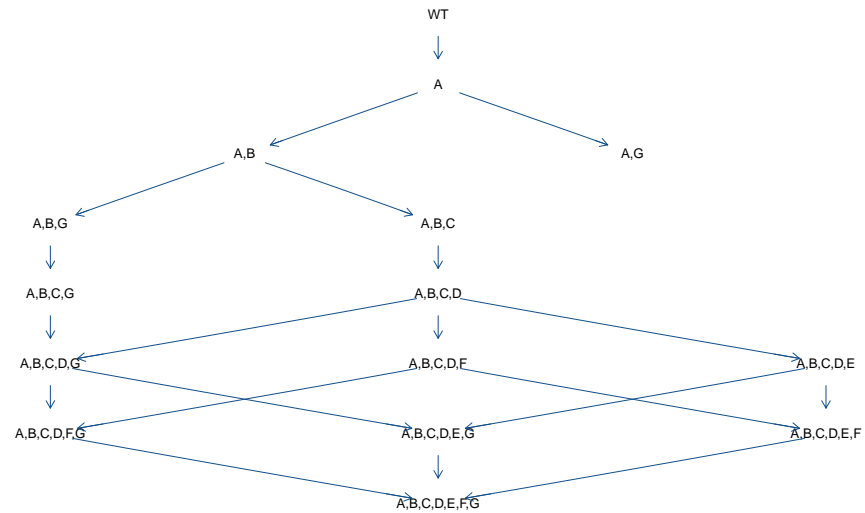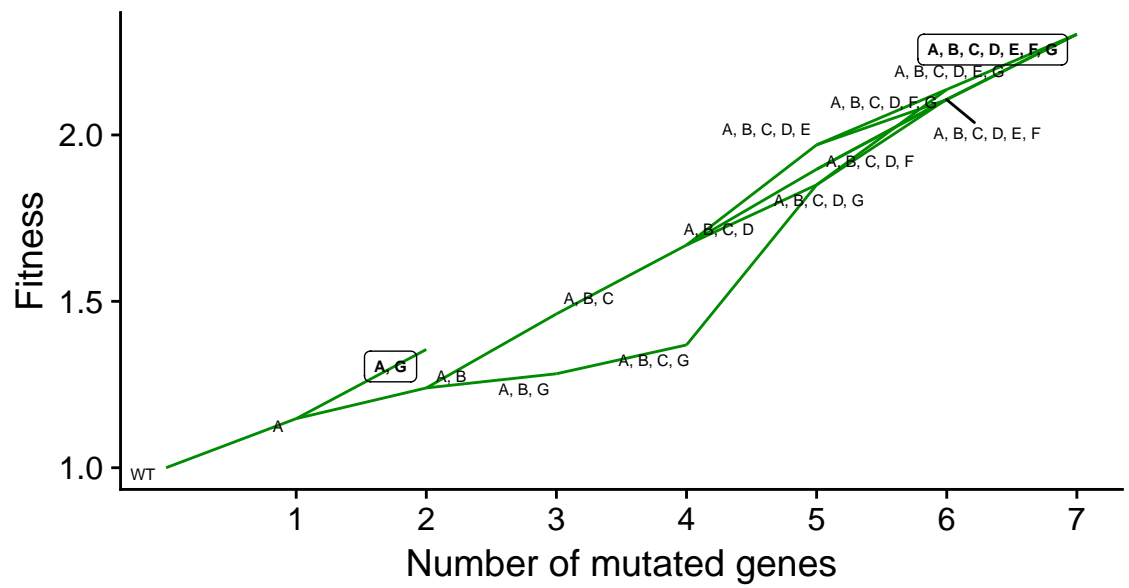

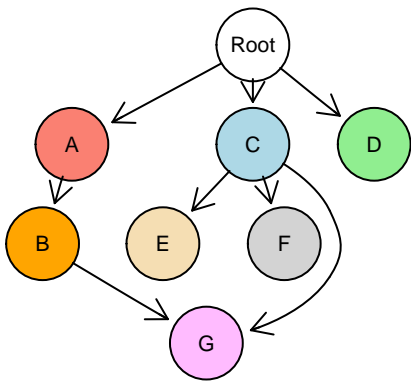

ID **t4BmCLHxEiv103ES6**  
 acc genotypes **38**  
 peaks no back **8**  
 removed edges **17**  
 prop rem edges **0.2**

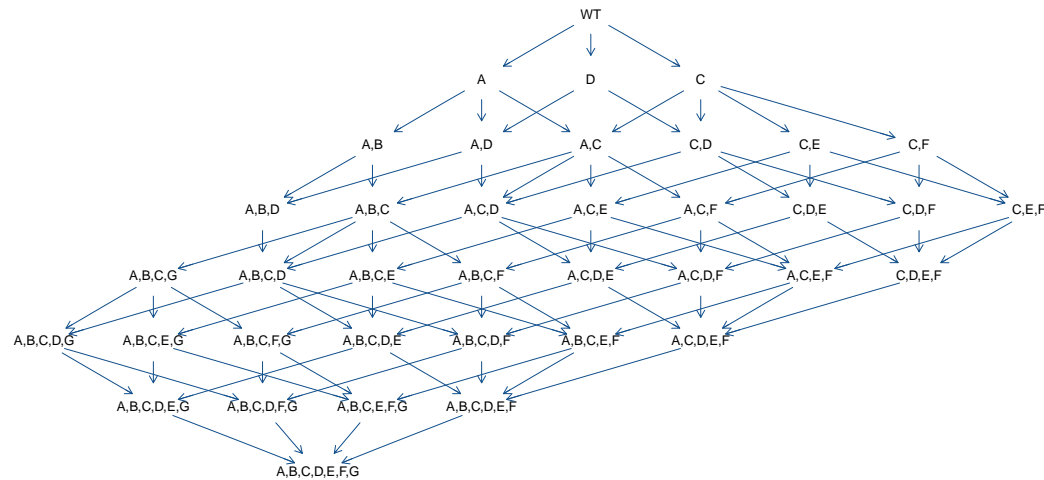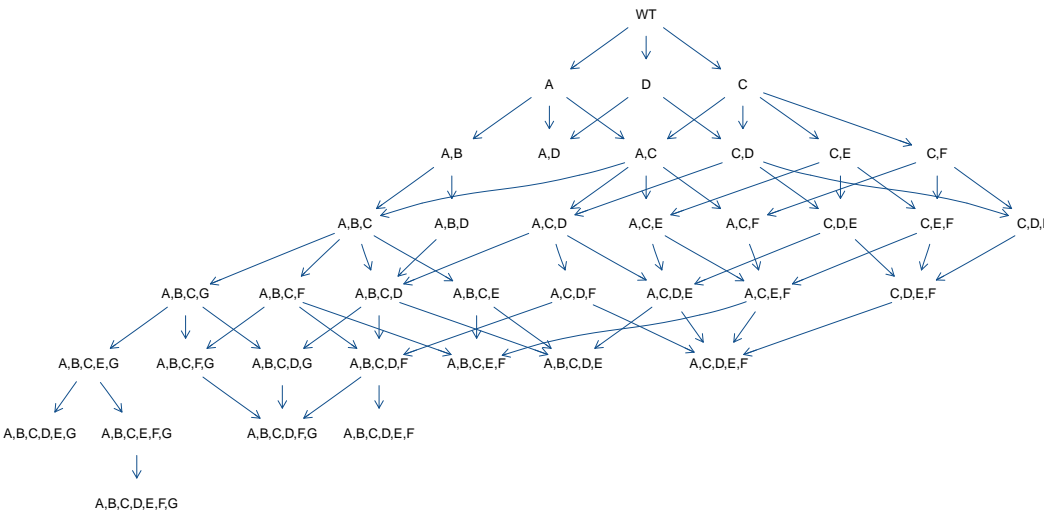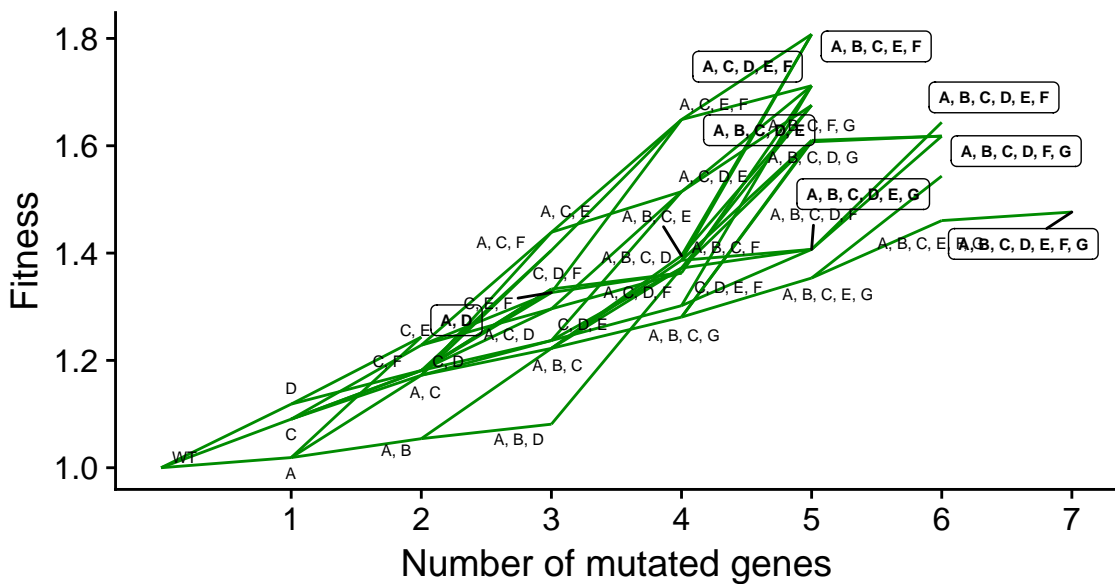

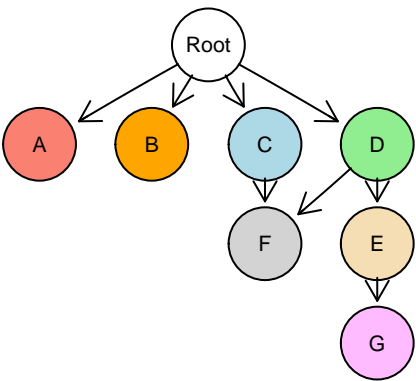

ID T9n9yW1qk7hj10GjU  
 acc genotypes 44  
 peaks no back 7  
 removed edges 25  
 prop rem edges 0.24

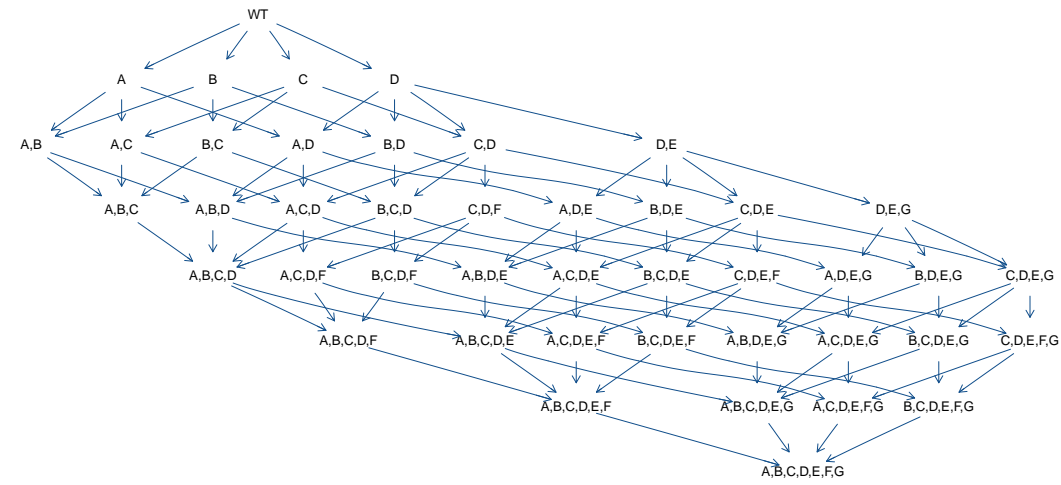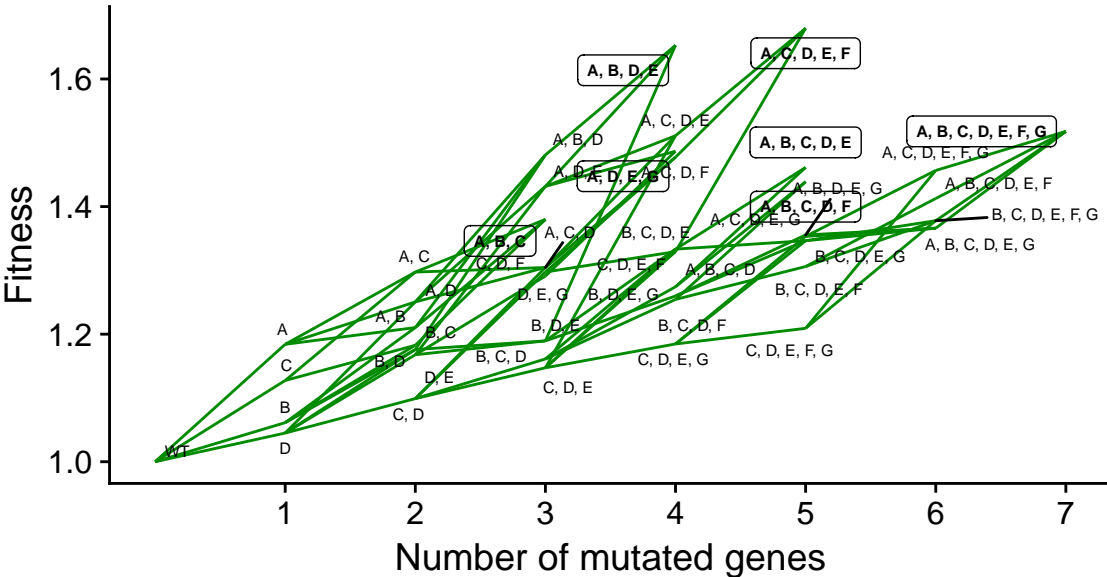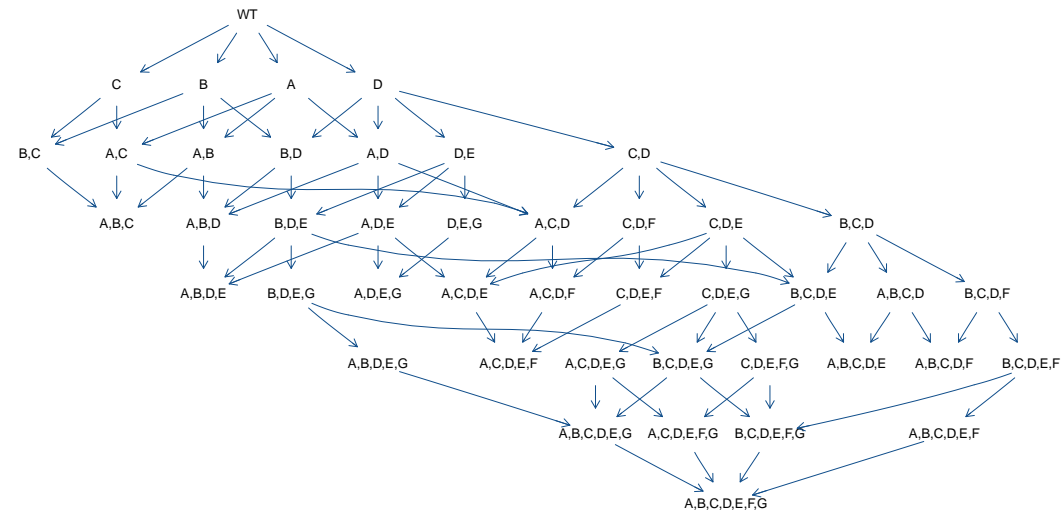

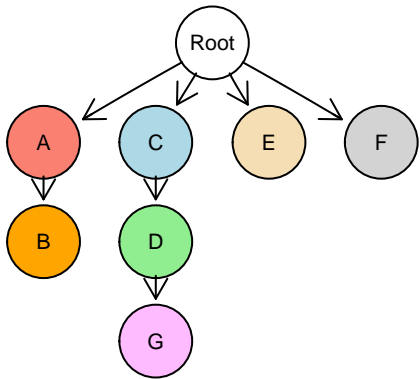

ID **TcQu1TxmYIxeOT4**  
 acc genotypes **48**  
 peaks no back **6**  
 removed edges **19**  
 prop rem edges **0.164**

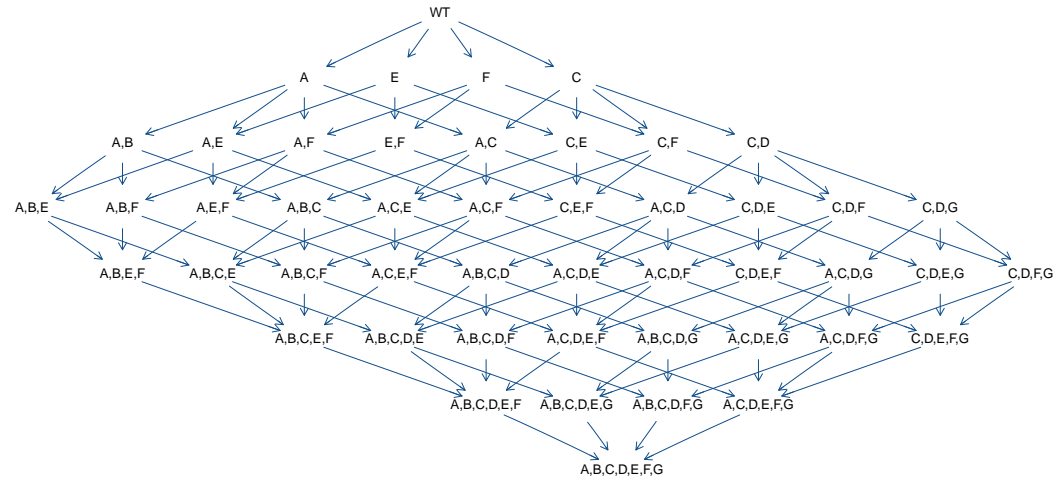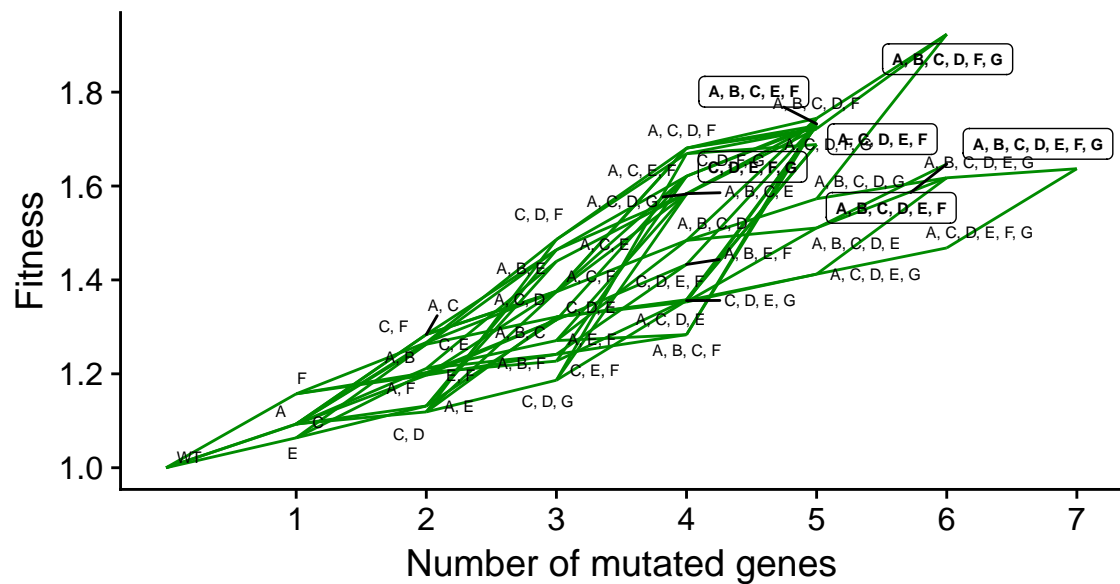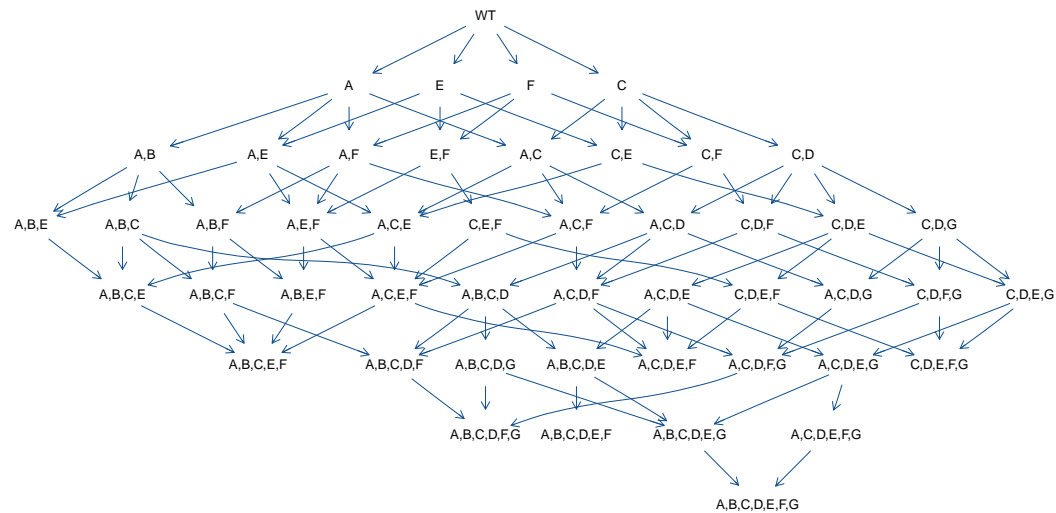

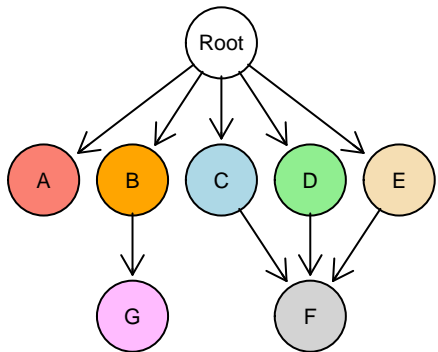

ID **tdjsoypZIFJzIC50**  
 acc genotypes **54**  
 peaks no back **7**  
 removed edges **23**  
 prop rem edges **0.163**

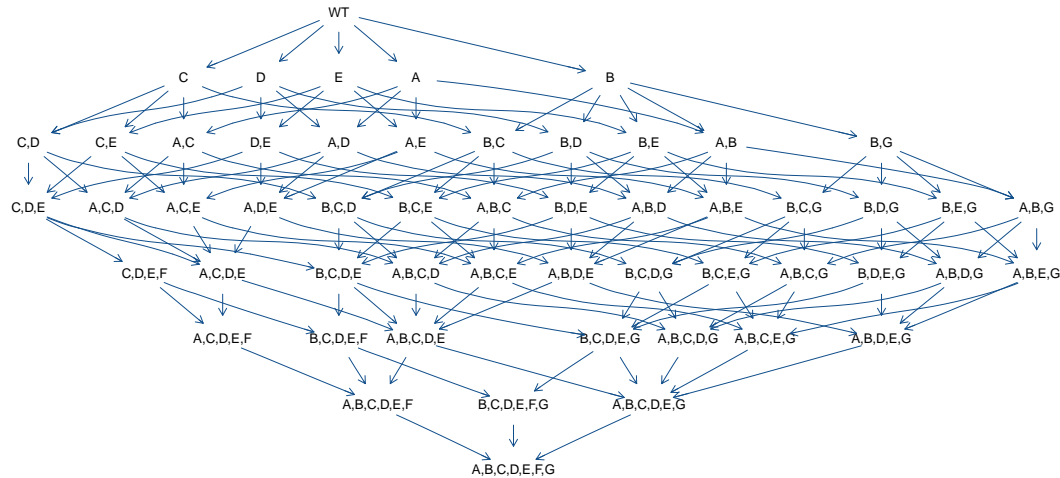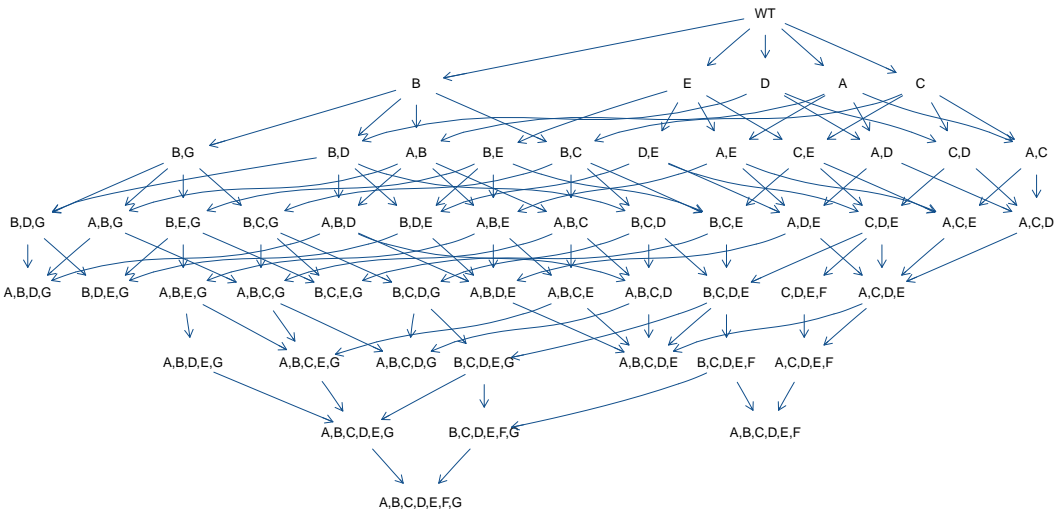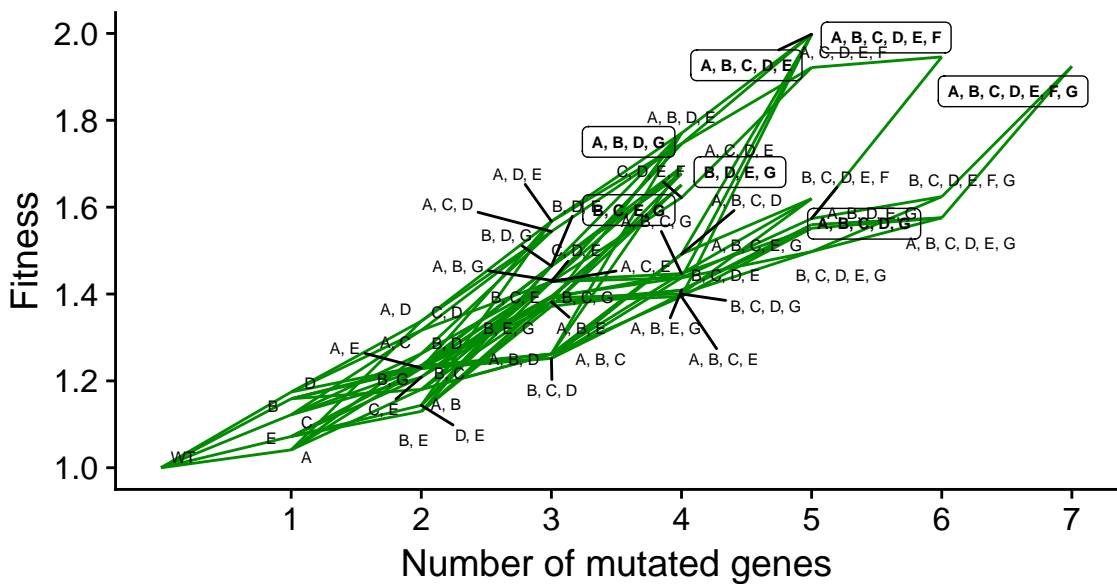

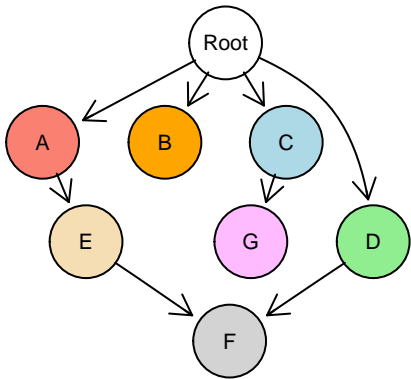

ID **THM3Re8Dzit9K5X**  
 acc genotypes **42**  
 peaks no back **6**  
 removed edges **12**  
 prop rem edges **0.124**

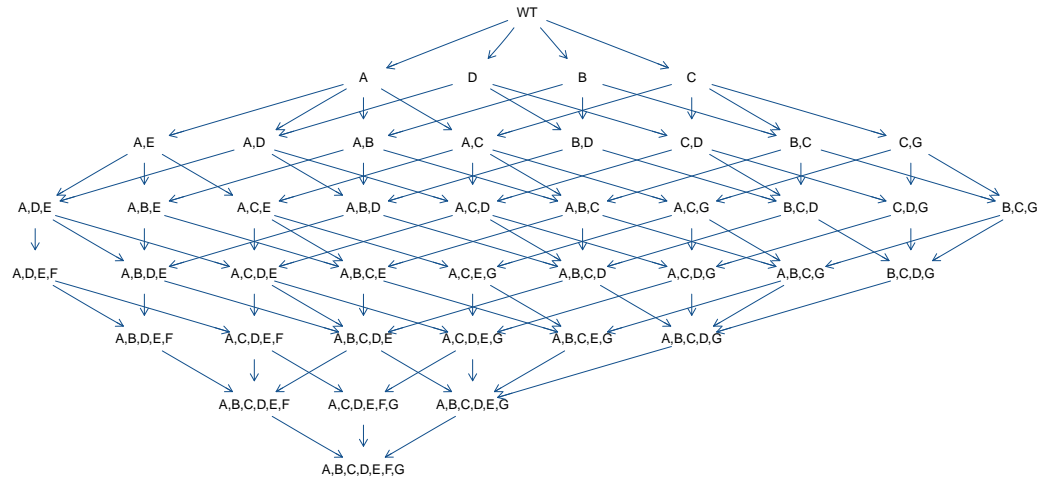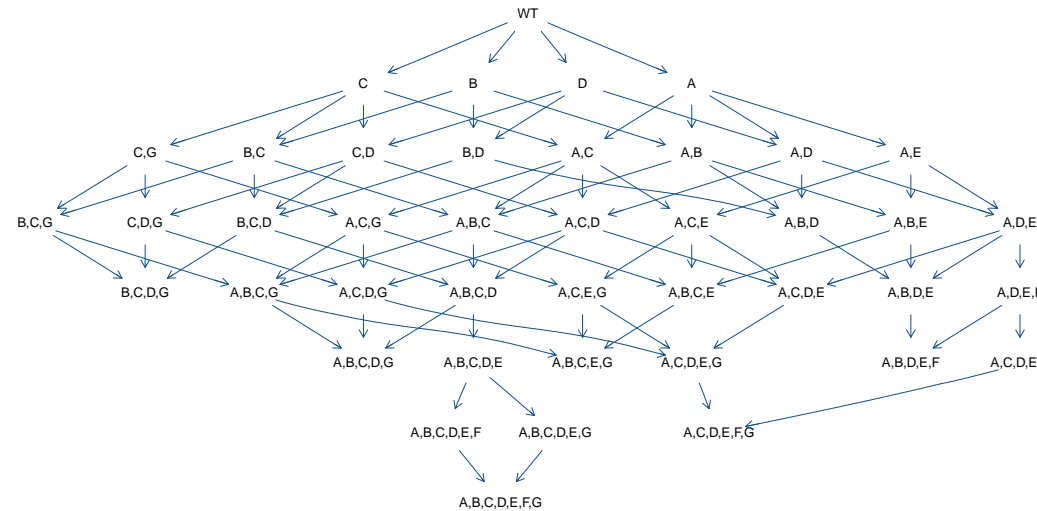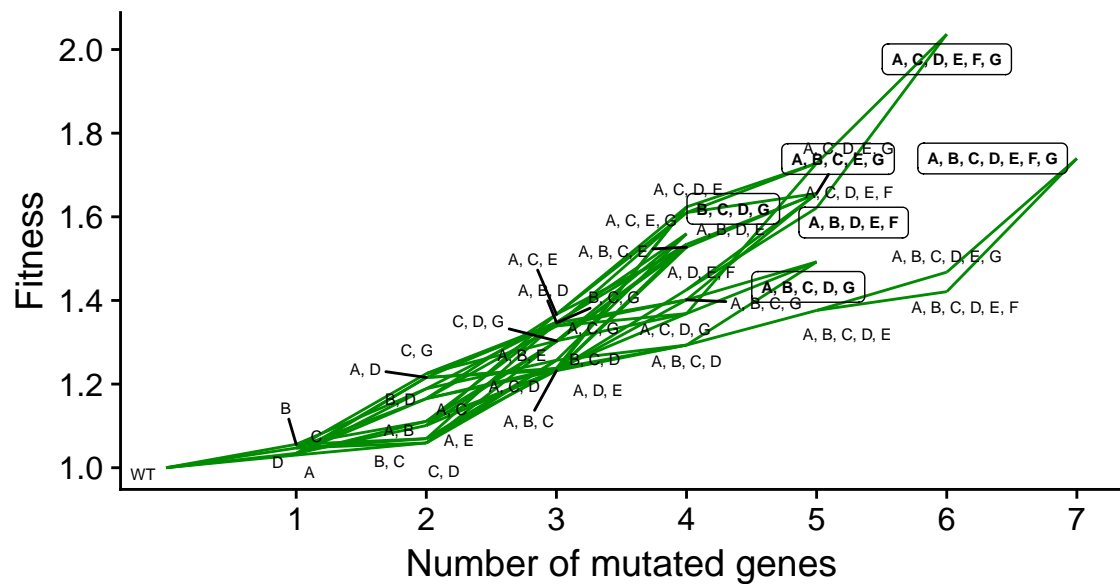

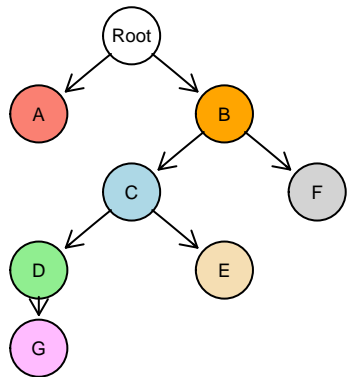

ID tPr5Vg10103qrkePxM  
 acc genotypes 30  
 peaks no back 5  
 removed edges 10  
 prop rem edges 0.159

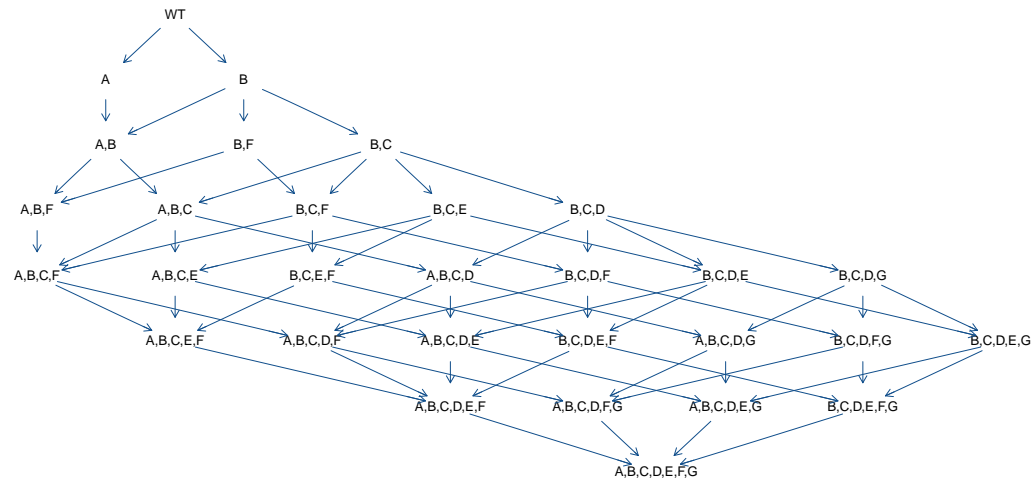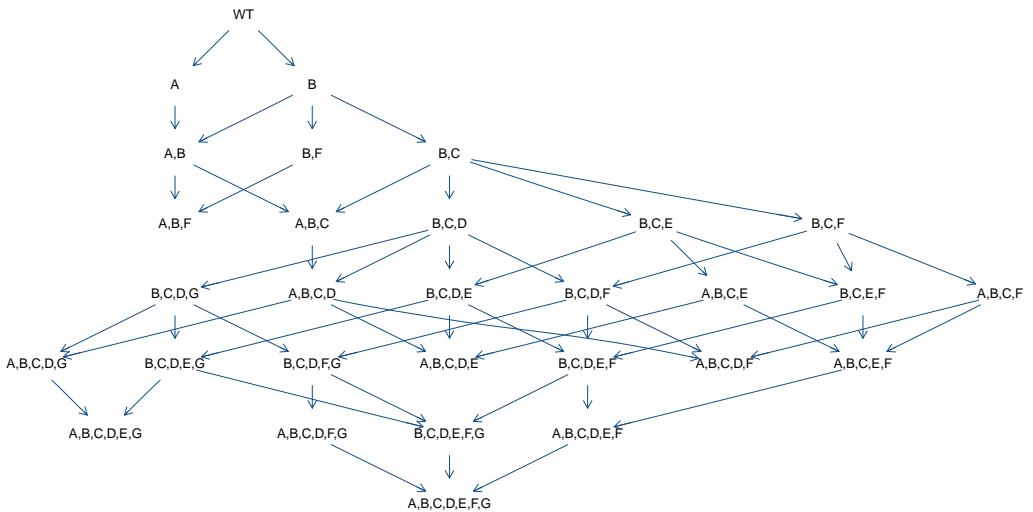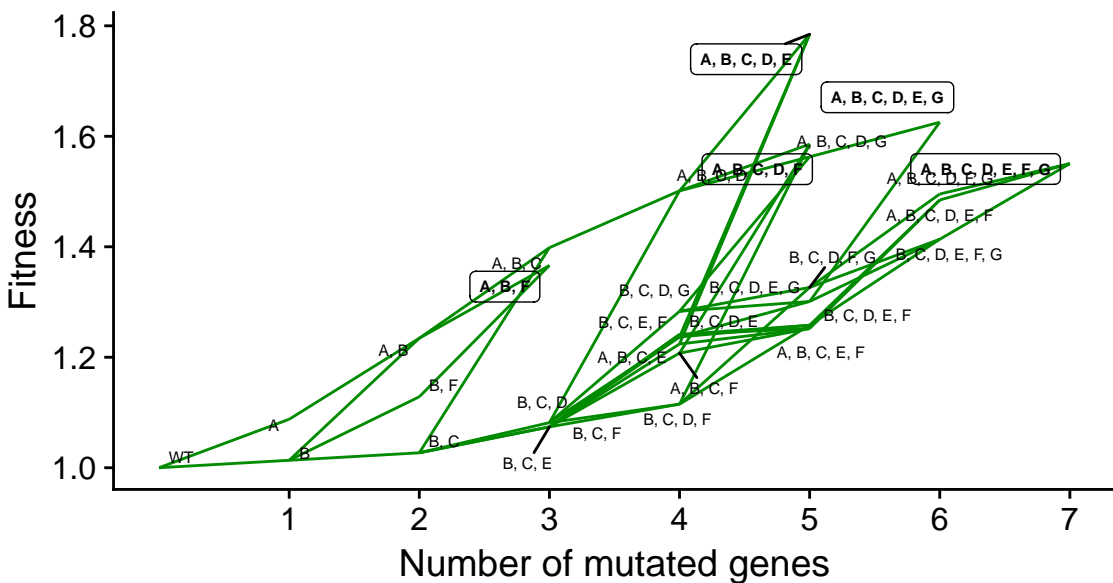

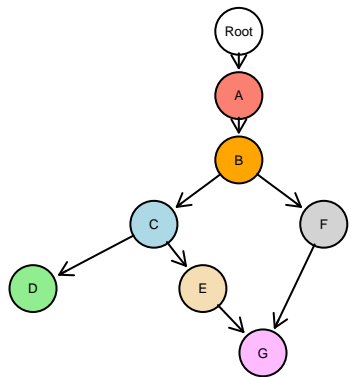

ID **tZ722GsITVDN5PNF**  
 acc genotypes **14**  
 peaks no back **4**  
 removed edges **4**  
 prop rem edges **0.2**

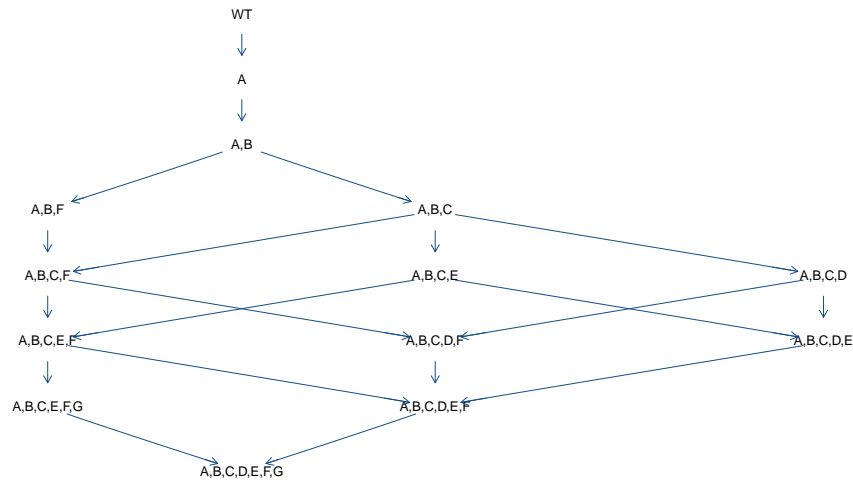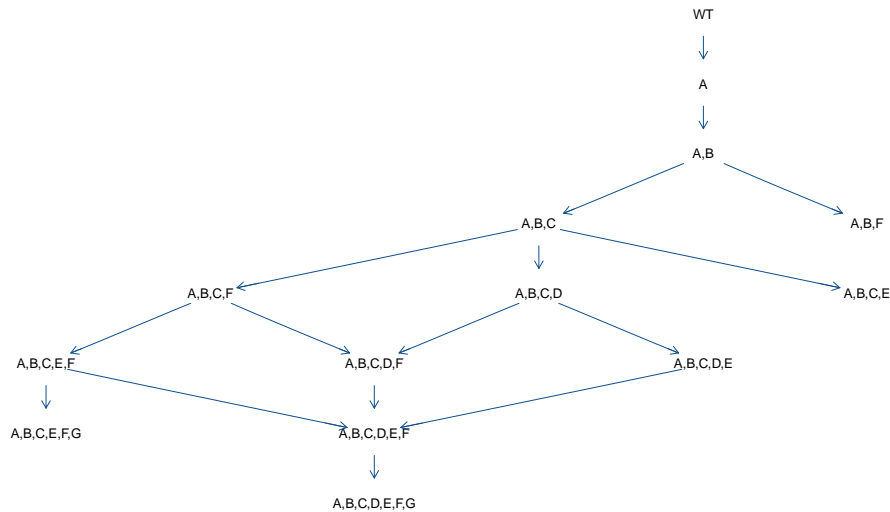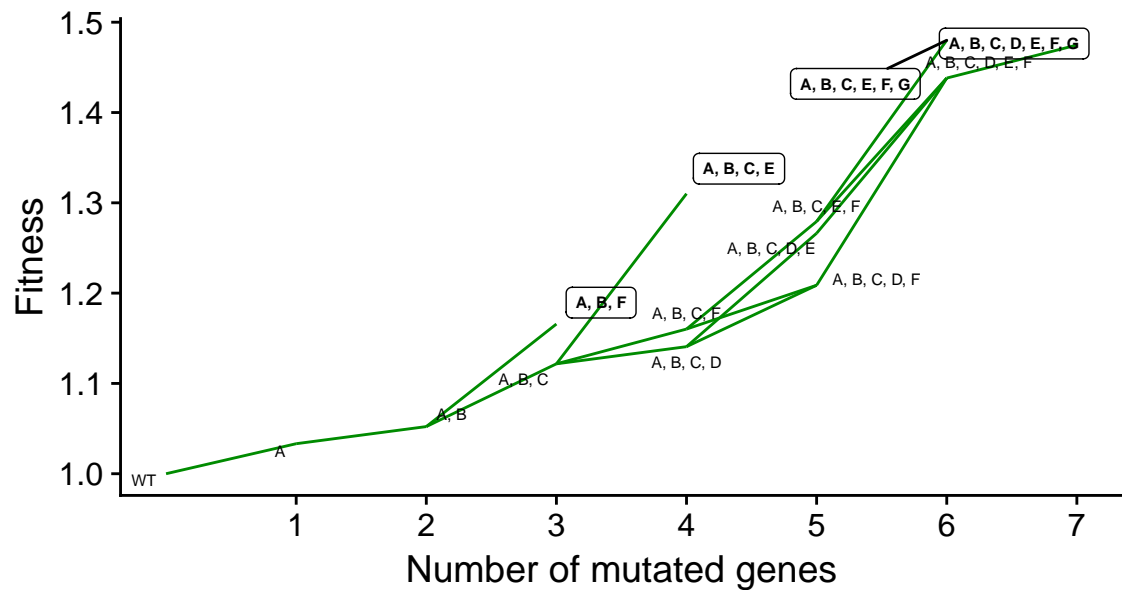



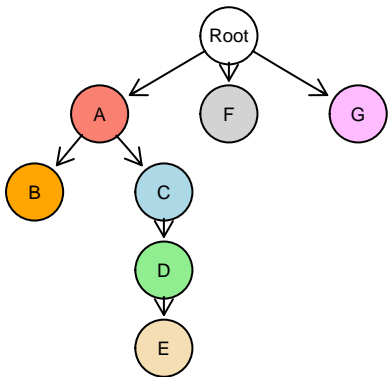

ID **U3F9k2e17pCATfZA**  
 acc genotypes **36**  
 peaks no back **6**  
 removed edges **9**  
 prop rem edges **0.112**

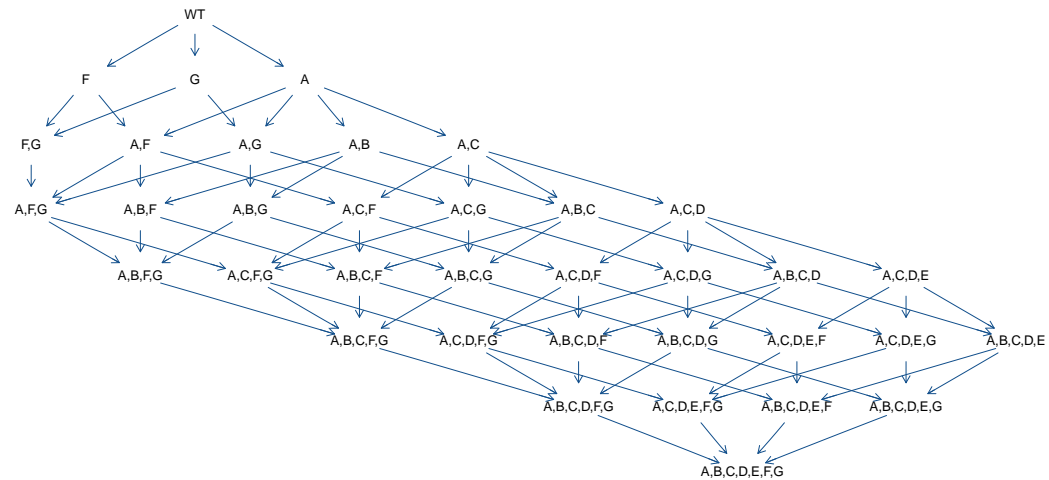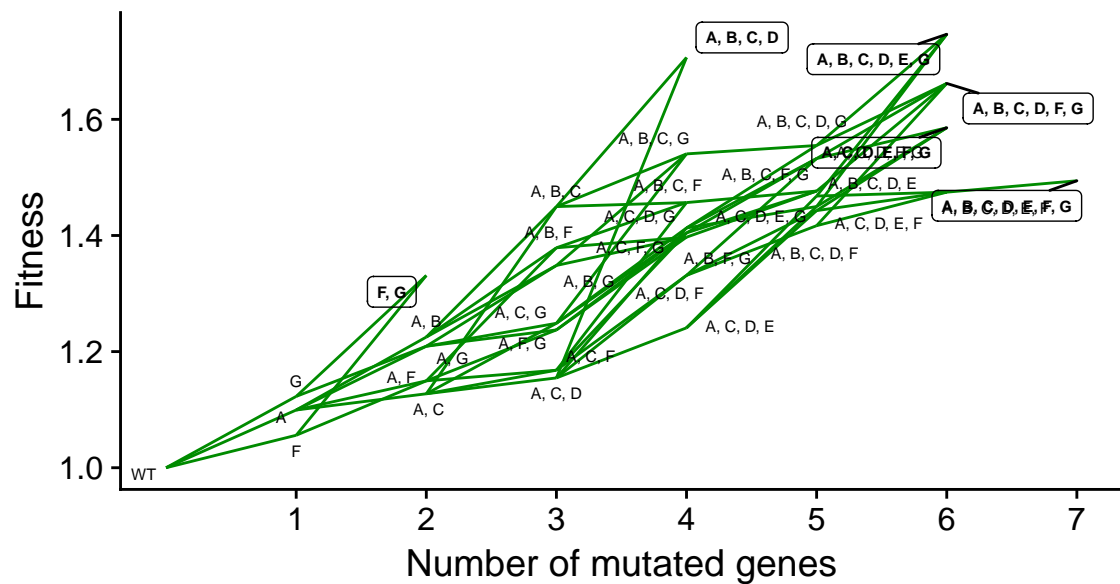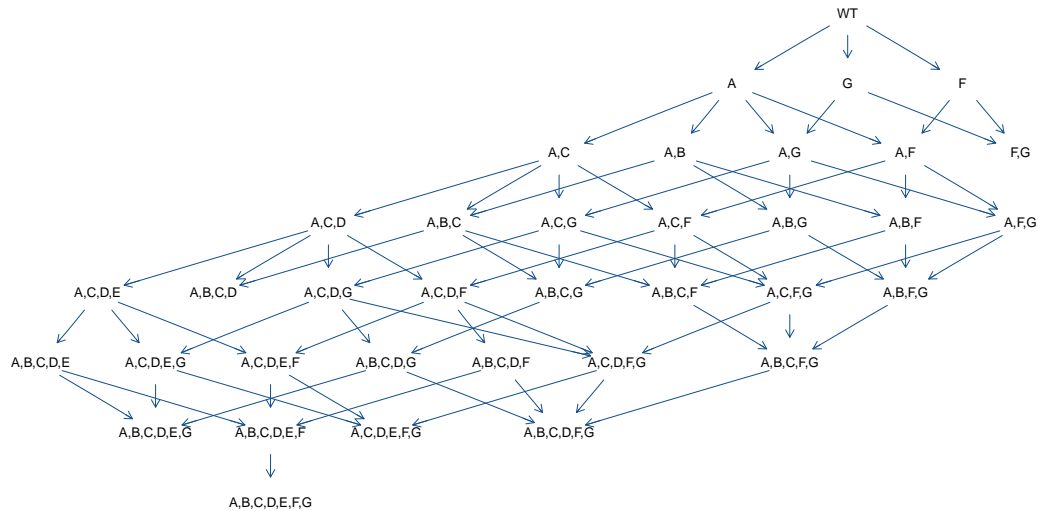

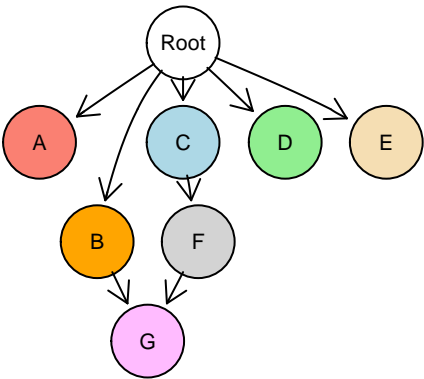

ID **u5c4a1CX10bL5RtgV**  
 acc genotypes **56**  
 peaks no back **7**  
 removed edges **27**  
 prop rem edges **0.182**

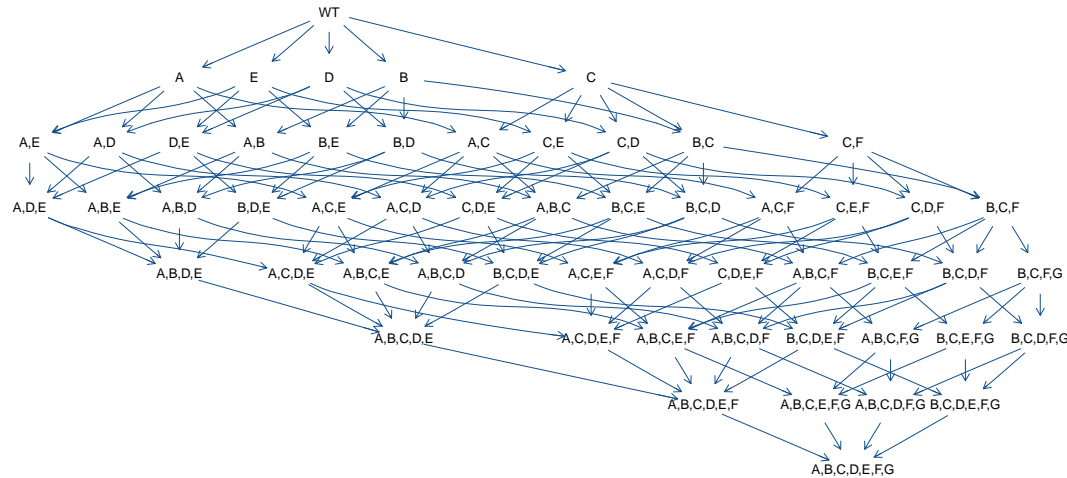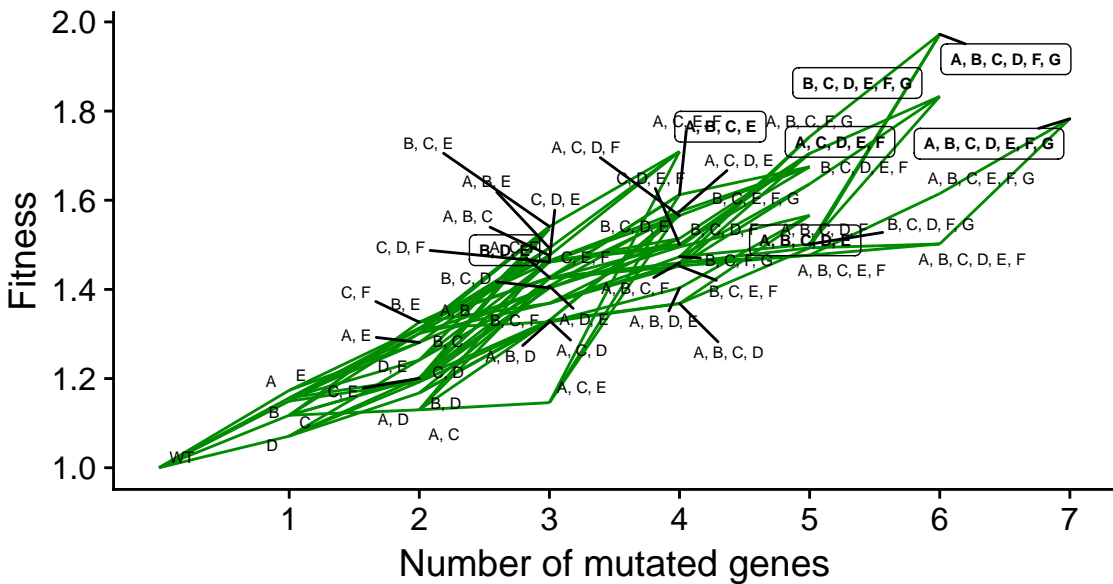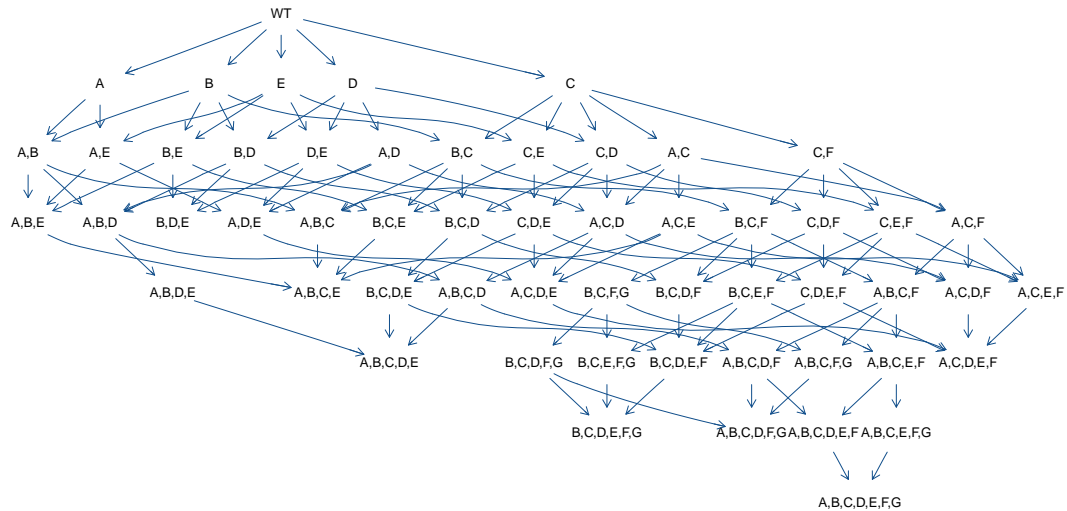

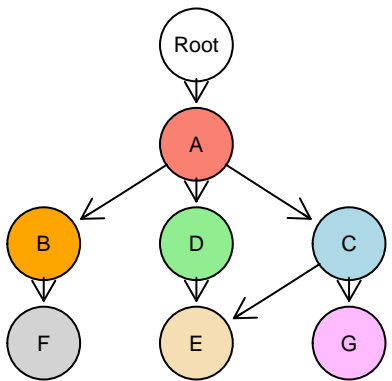

ID **U7zMFhVmpGvNZWah**  
 acc genotypes **25**  
 peaks no back **6**  
 removed edges **9**  
 prop rem edges **0.191**

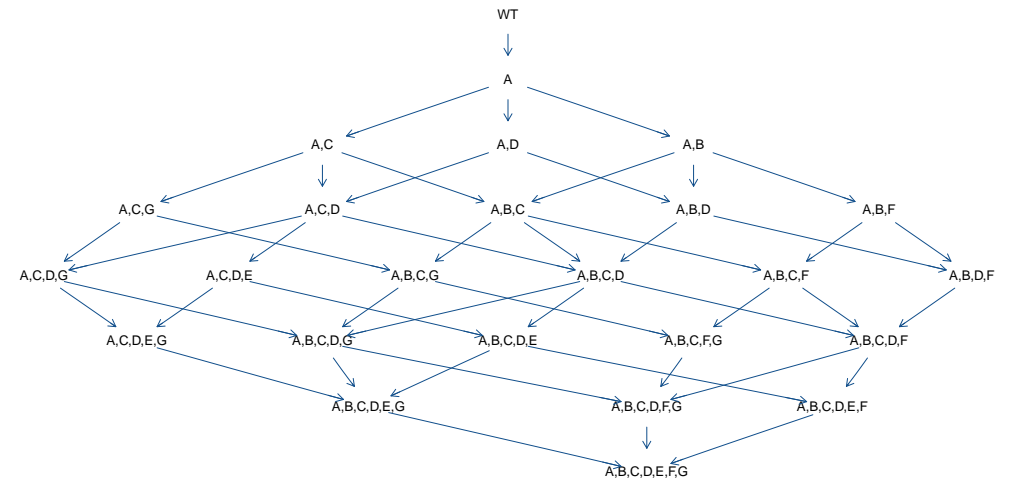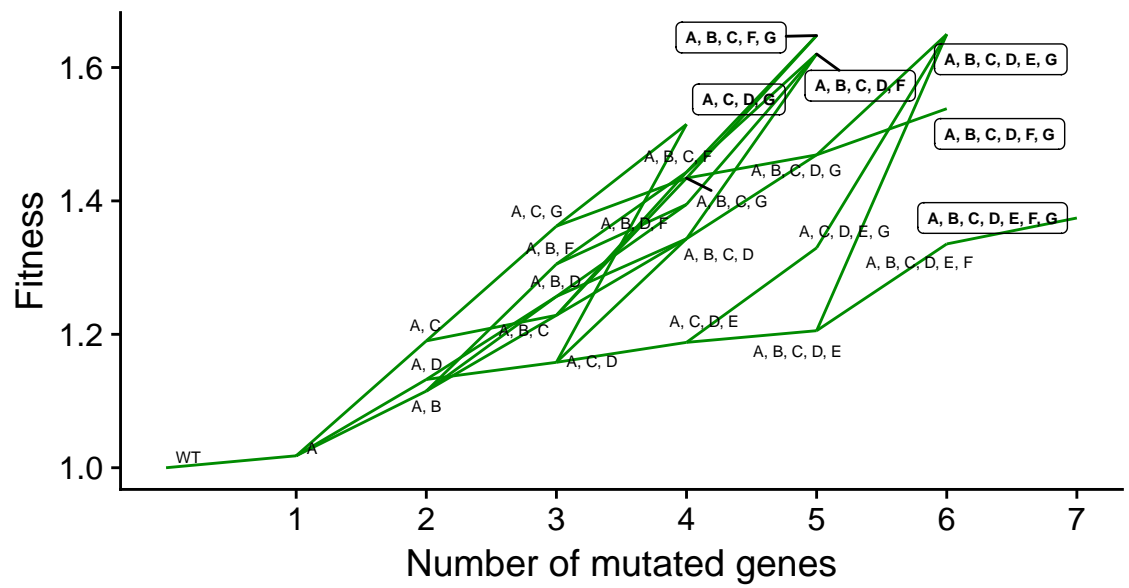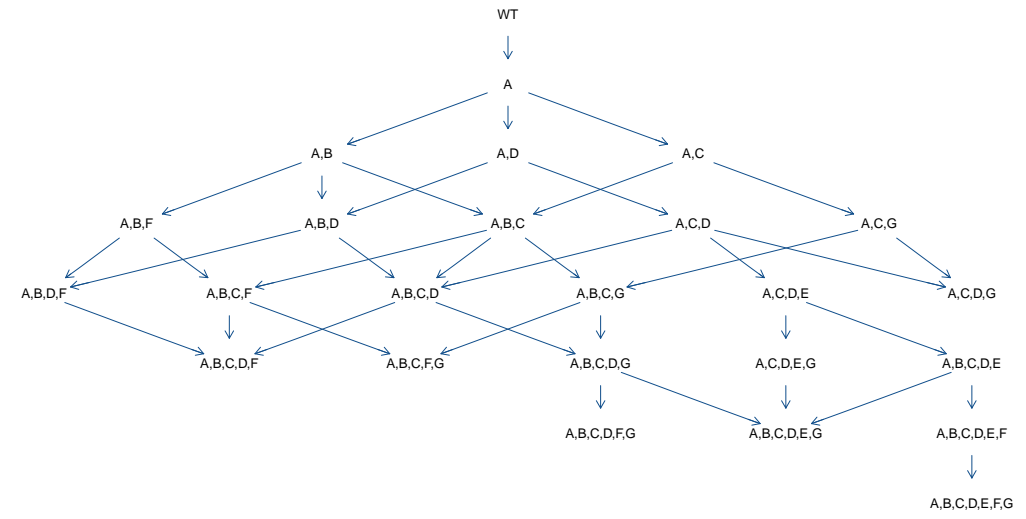

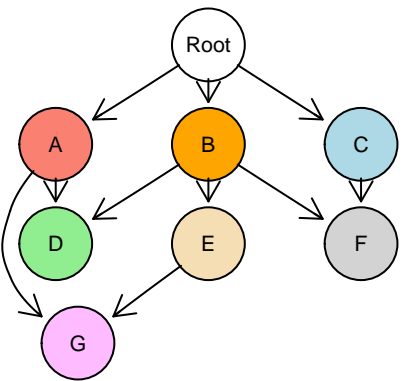

ID **UICZ6OQWroBIY8ER**  
 acc genotypes **28**  
 peaks no back **3**  
 removed edges **4**  
 prop rem edges **0.074**

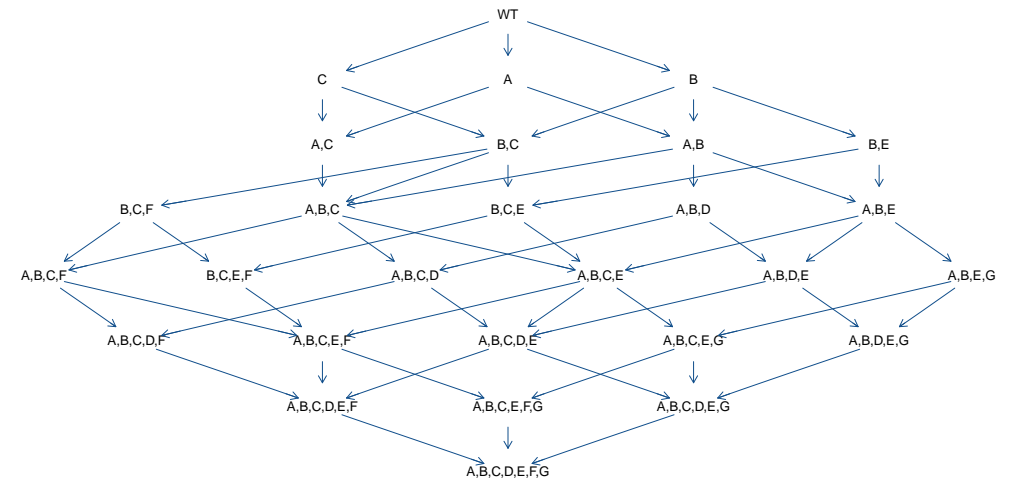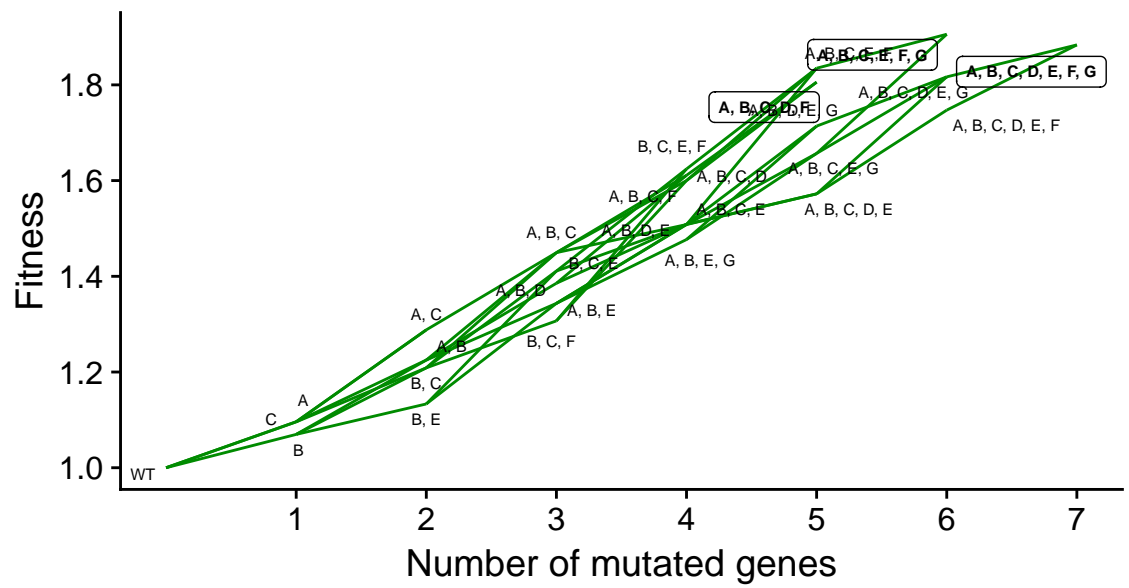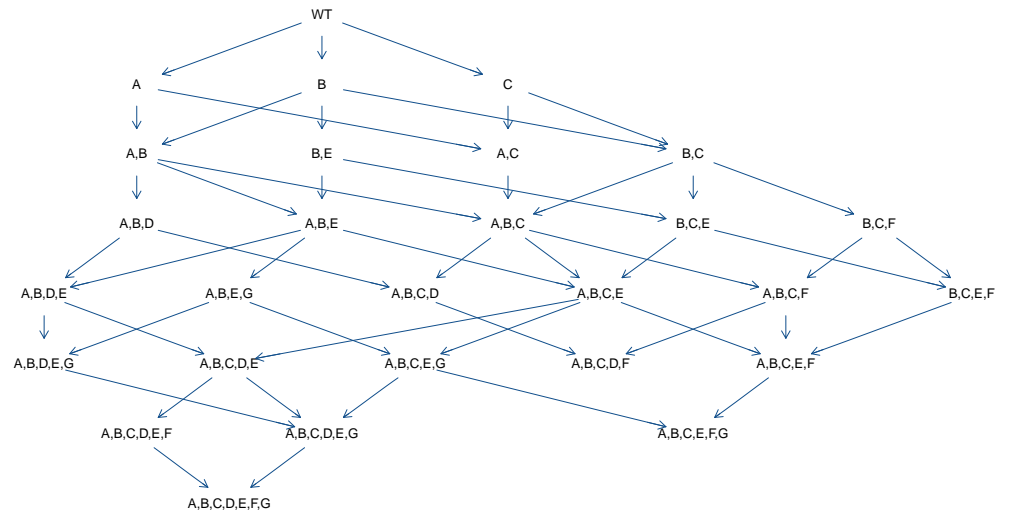



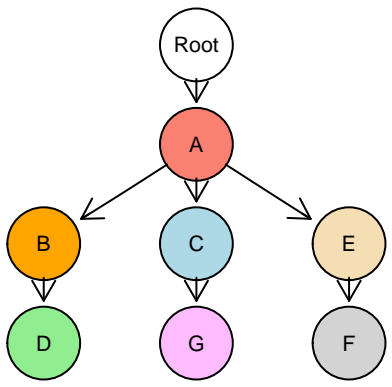

ID **uOqI5ivL2U4HWUKS**  
 acc genotypes **28**  
 peaks no back **4**  
 removed edges **4**  
 prop rem edges **0.073**

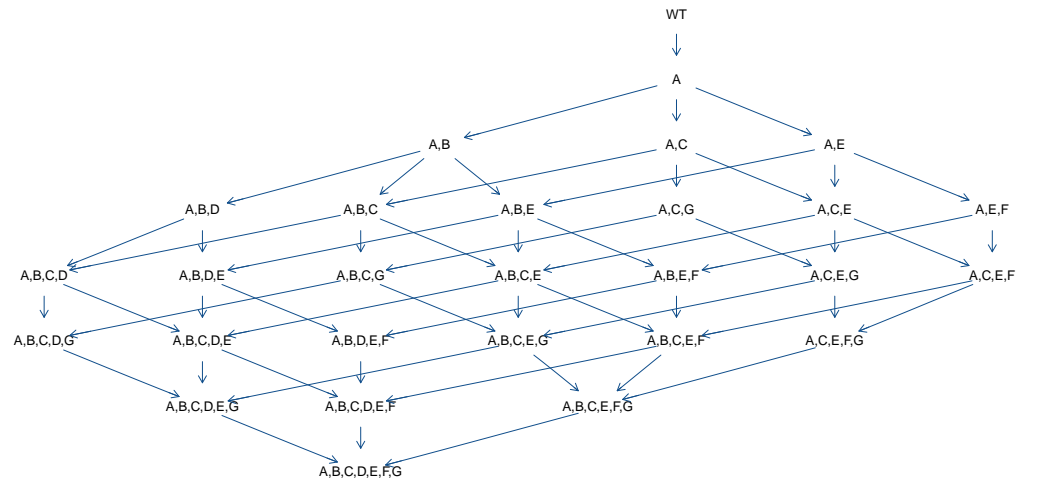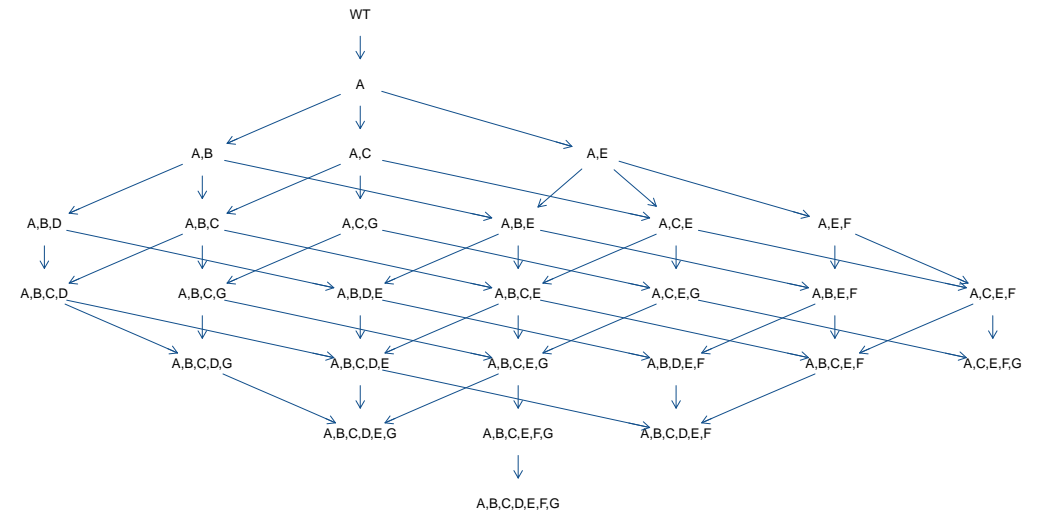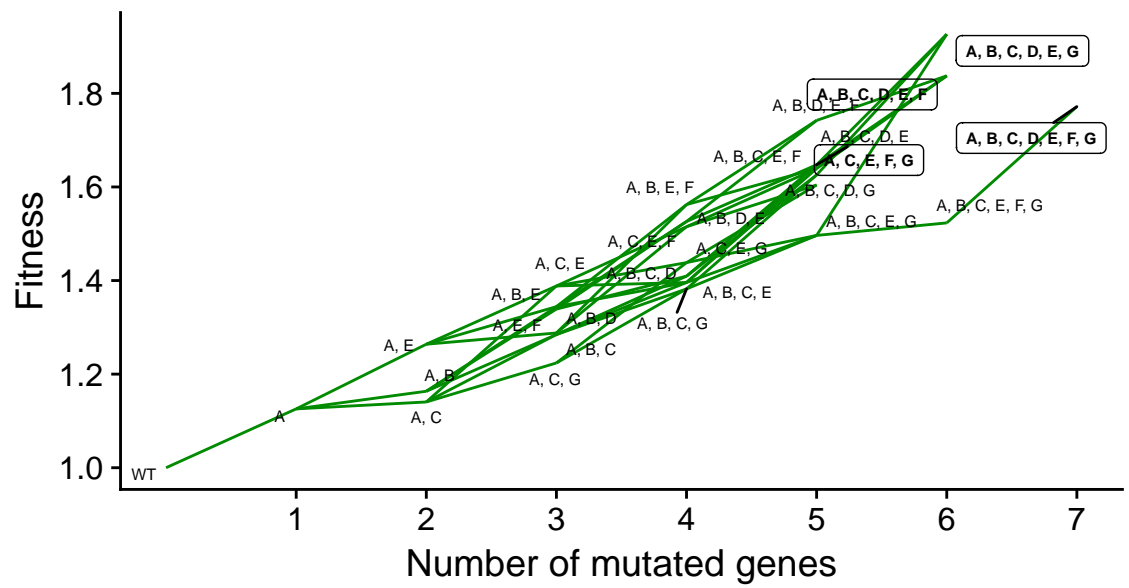

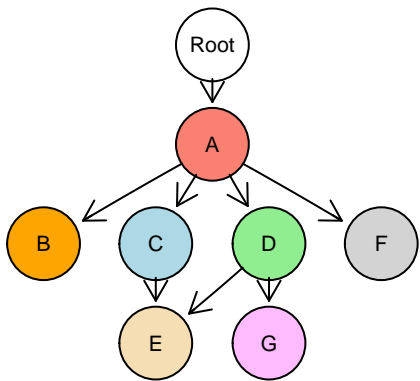

ID **upEZISo6oFVQcSEK**  
 acc genotypes **33**  
 peaks no back **6**  
 removed edges **10**  
 prop rem edges **0.137**

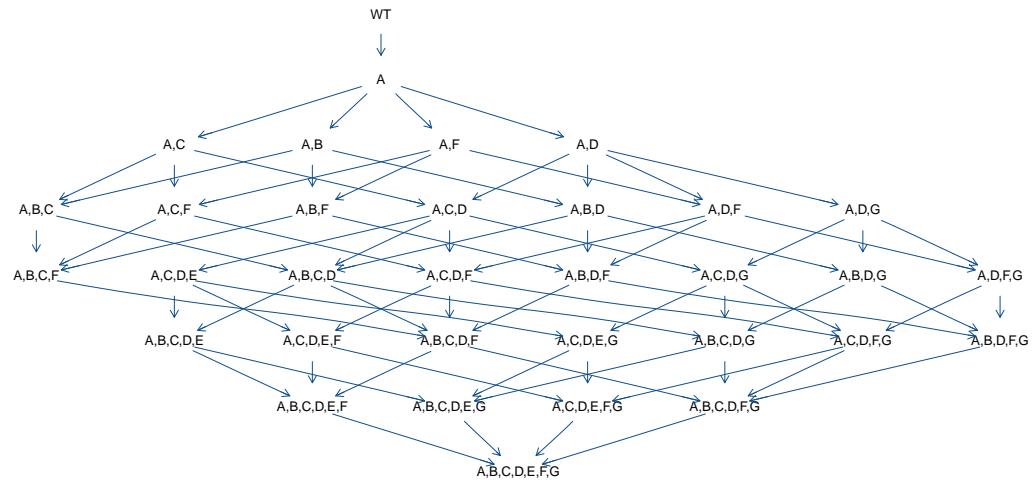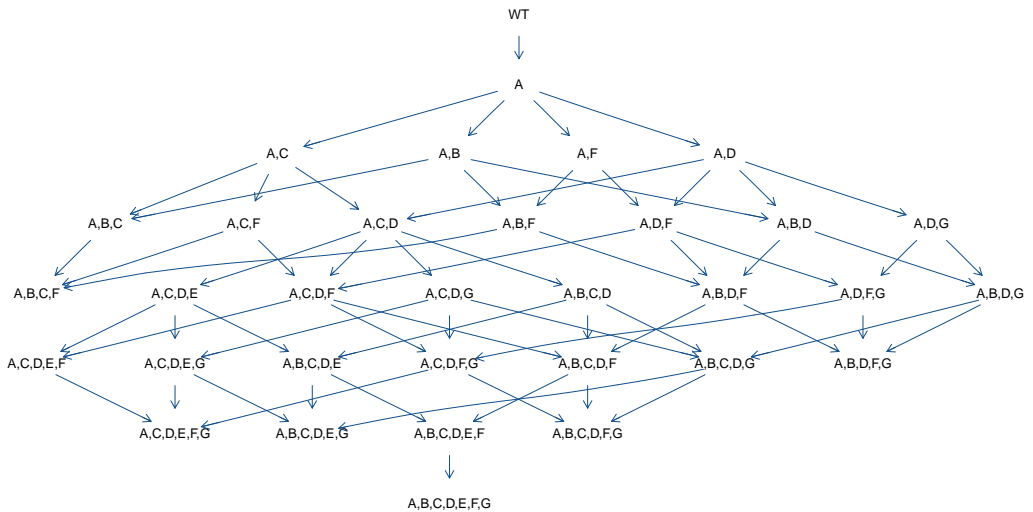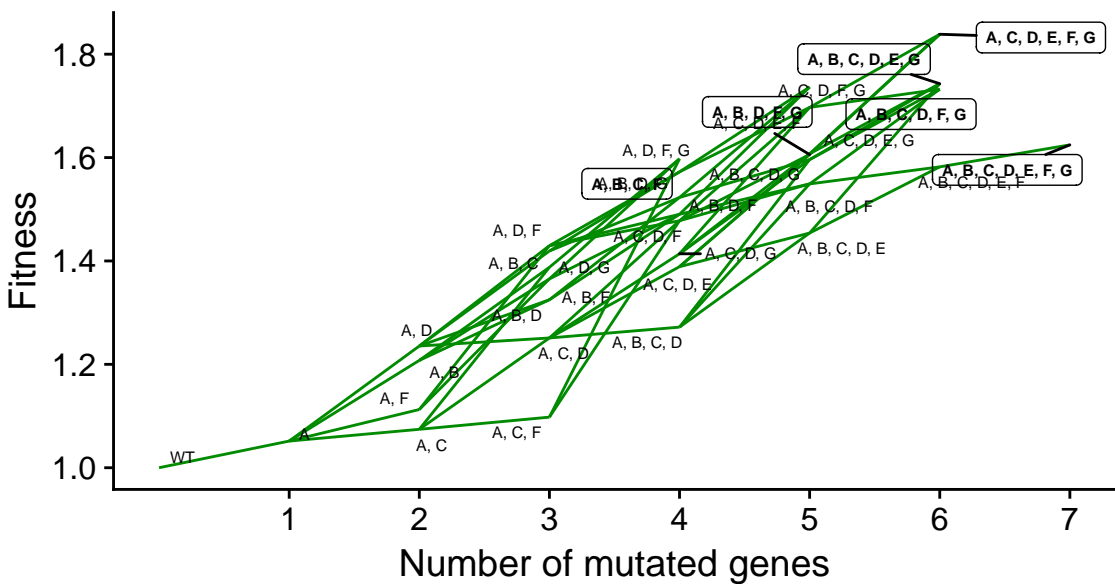

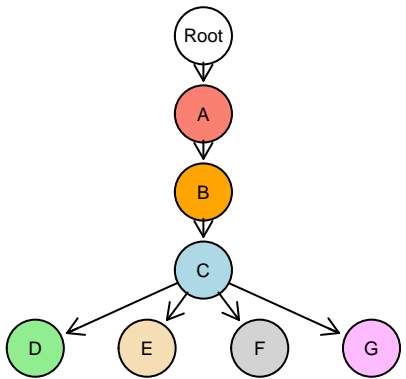

ID **UQu5n10aPzWHnGf59**  
 acc genotypes **19**  
 peaks no back **5**  
 removed edges **6**  
 prop rem edges **0.171**

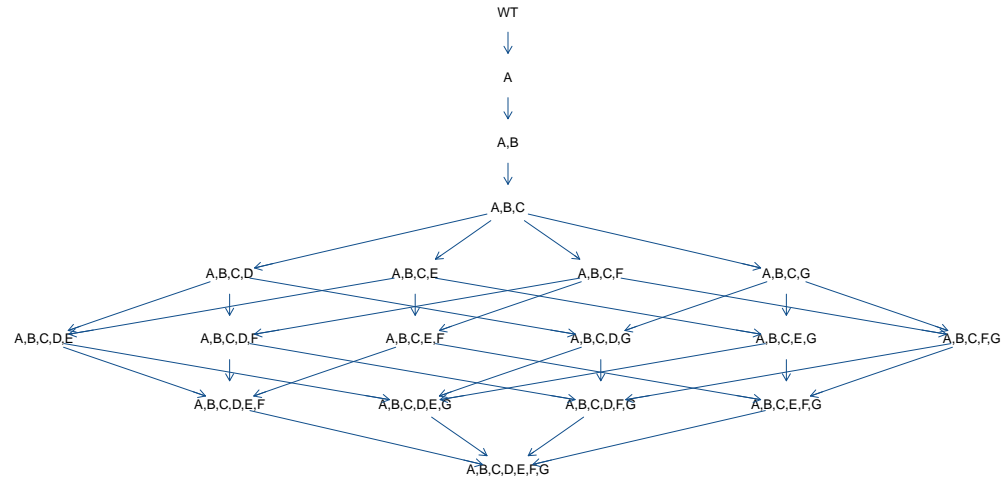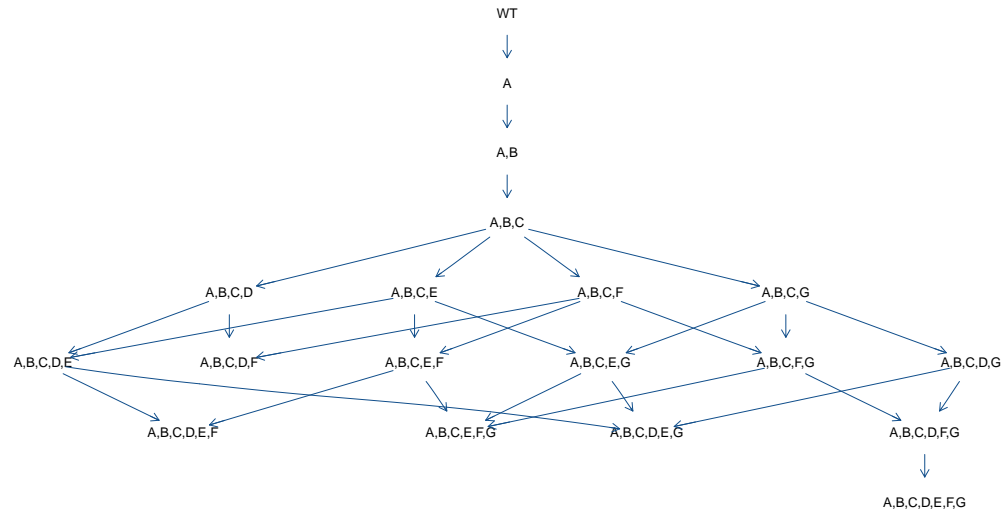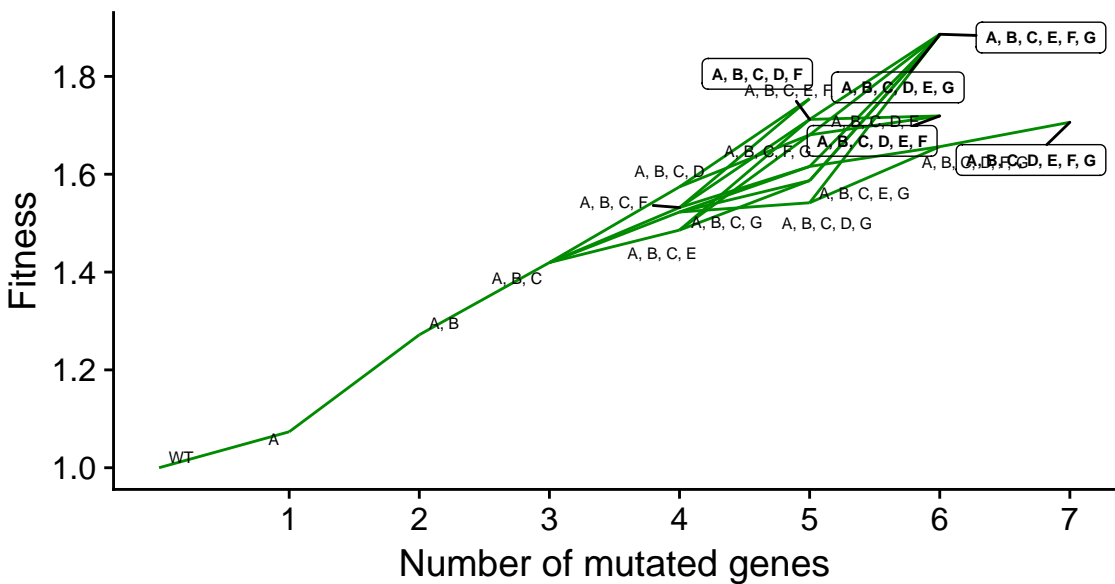



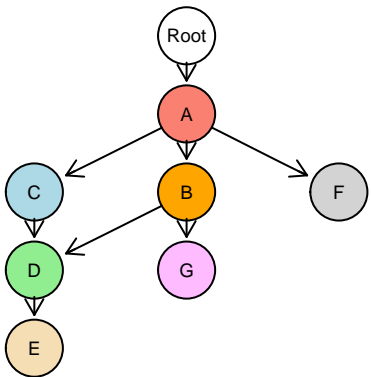

ID [uw7YHXhohAPISHwZ](#)  
 acc genotypes 21  
 peaks no back 2  
 removed edges 8  
 prop rem edges 0.216

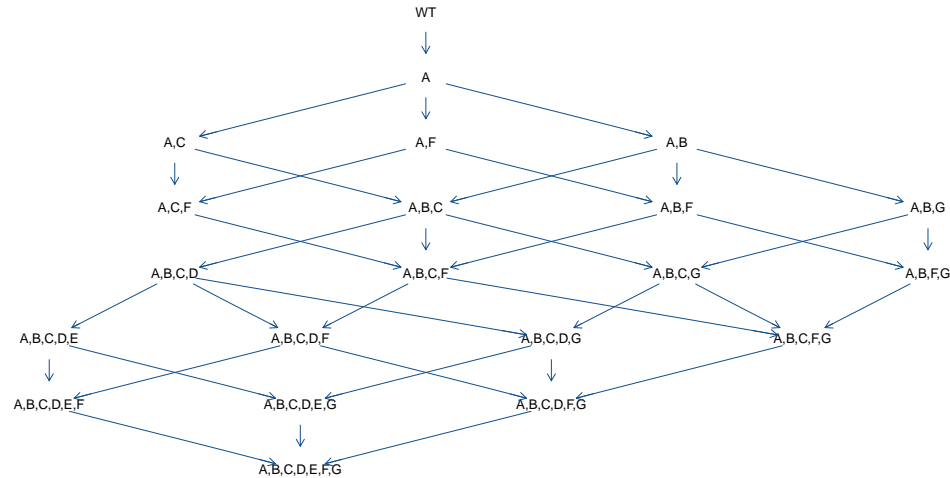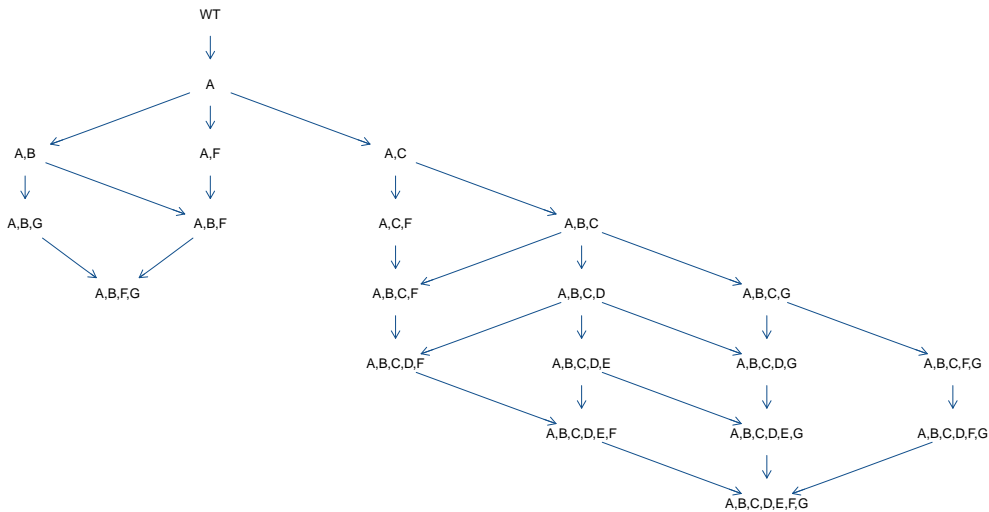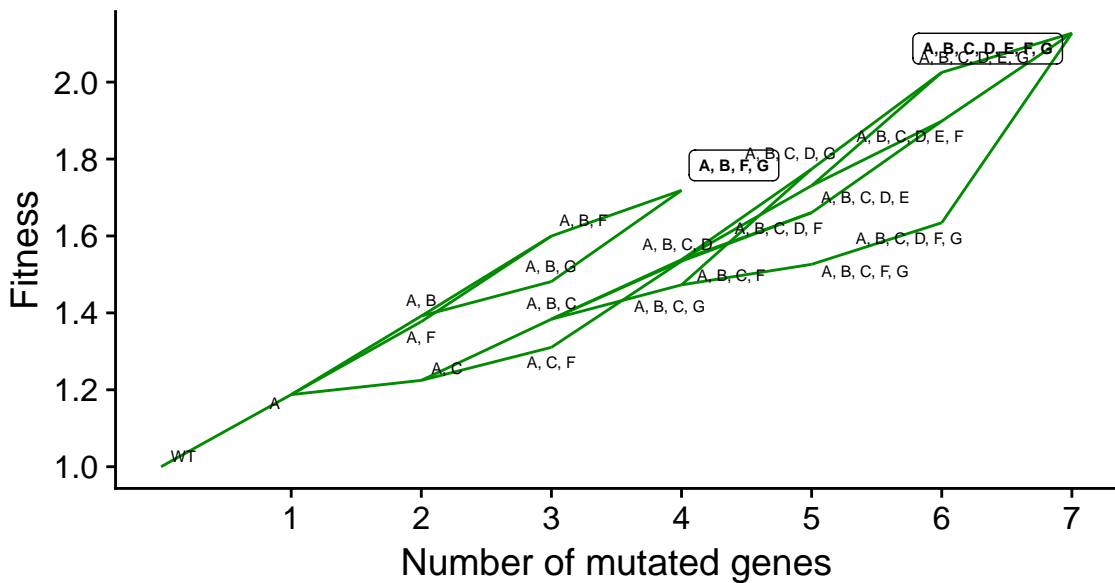

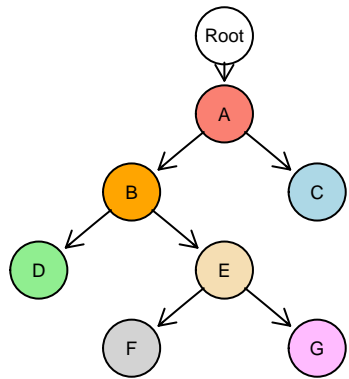

ID **V4JKndnKWM310nITX**  
 acc genotypes **23**  
 peaks no back **4**  
 removed edges **5**  
 prop rem edges **0.114**

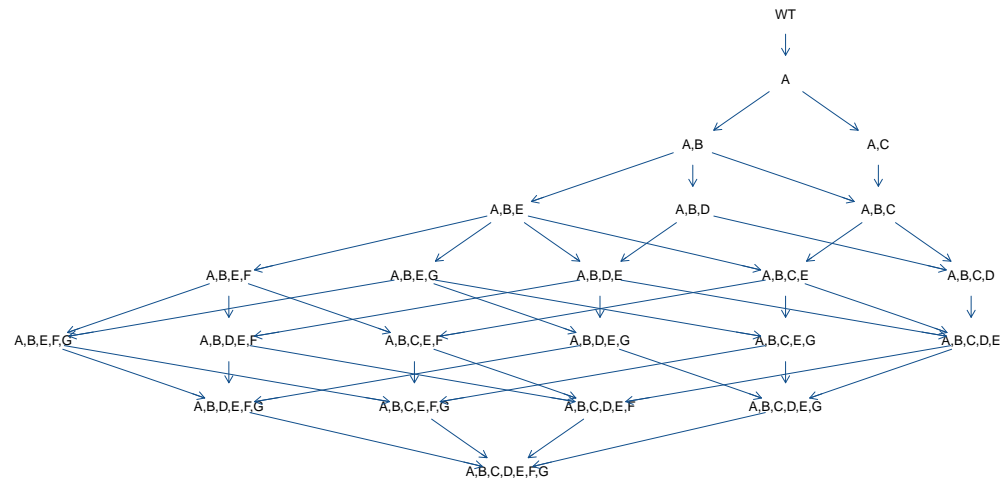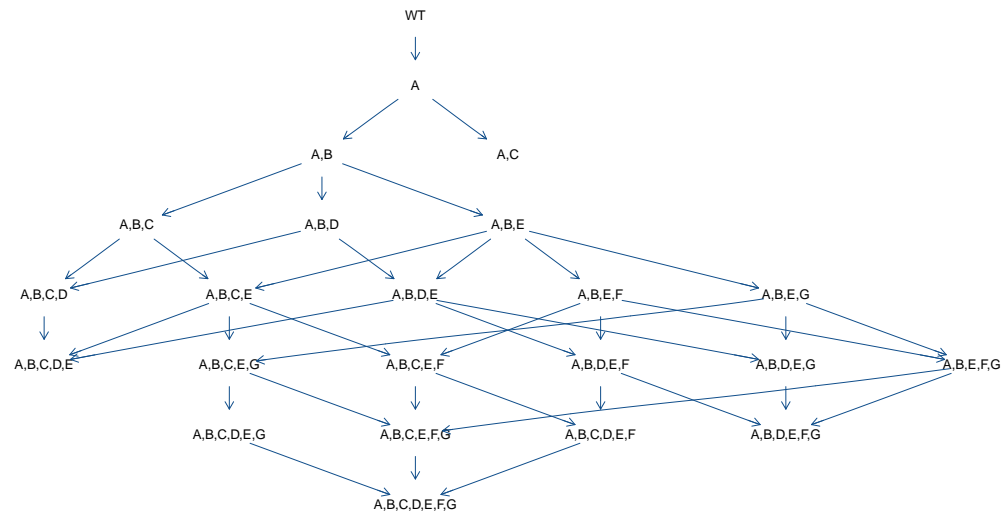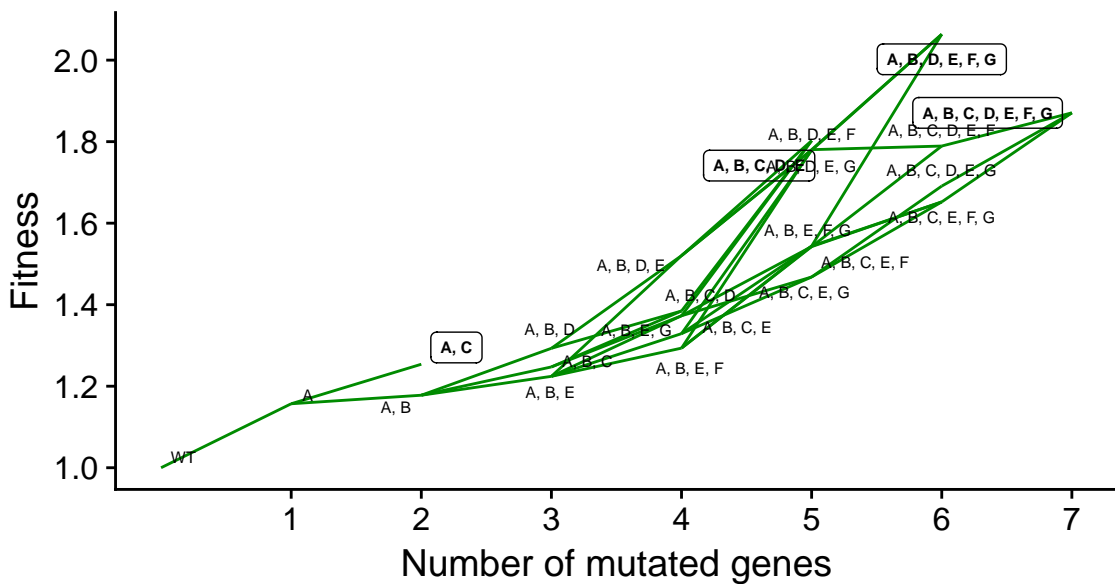

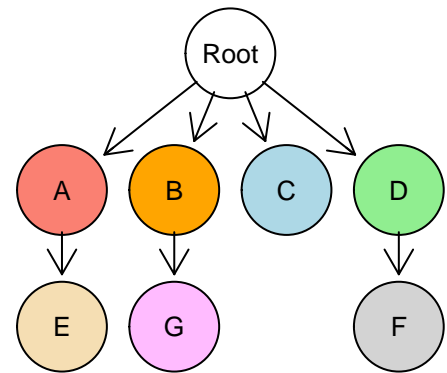

ID V4TR5vUVudRPVWmM  
 acc genotypes 54  
 peaks no back 8  
 removed edges 24  
 prop rem edges 0.178

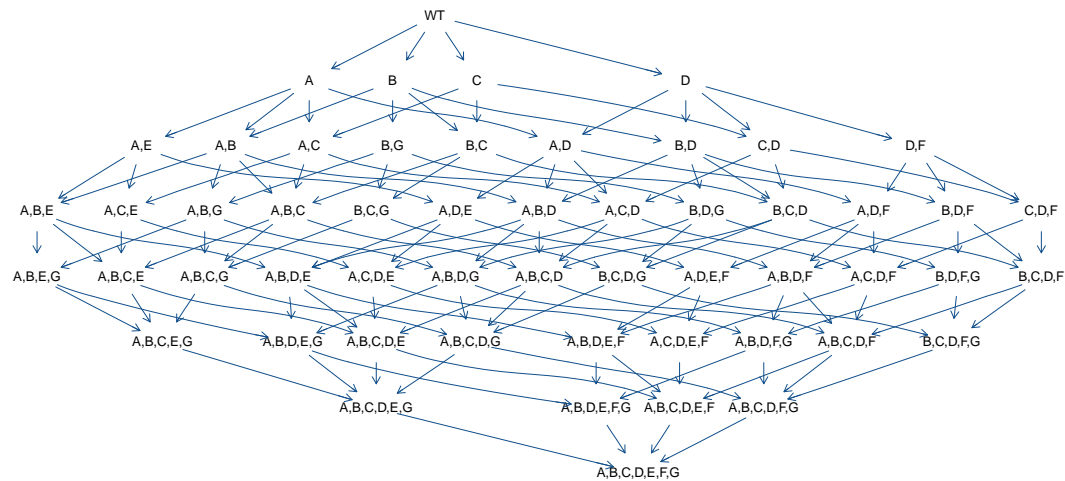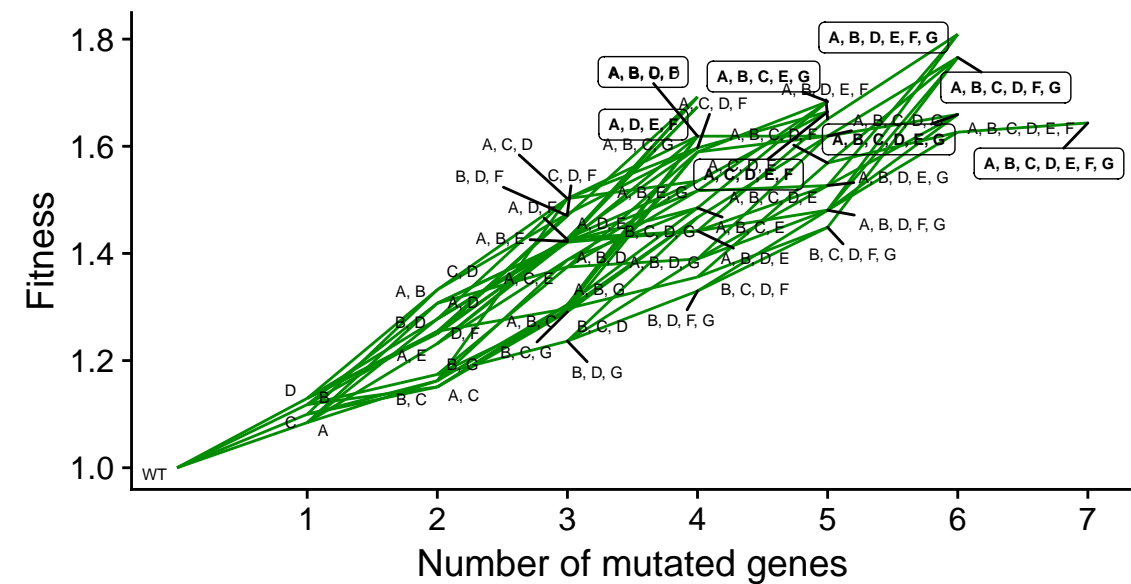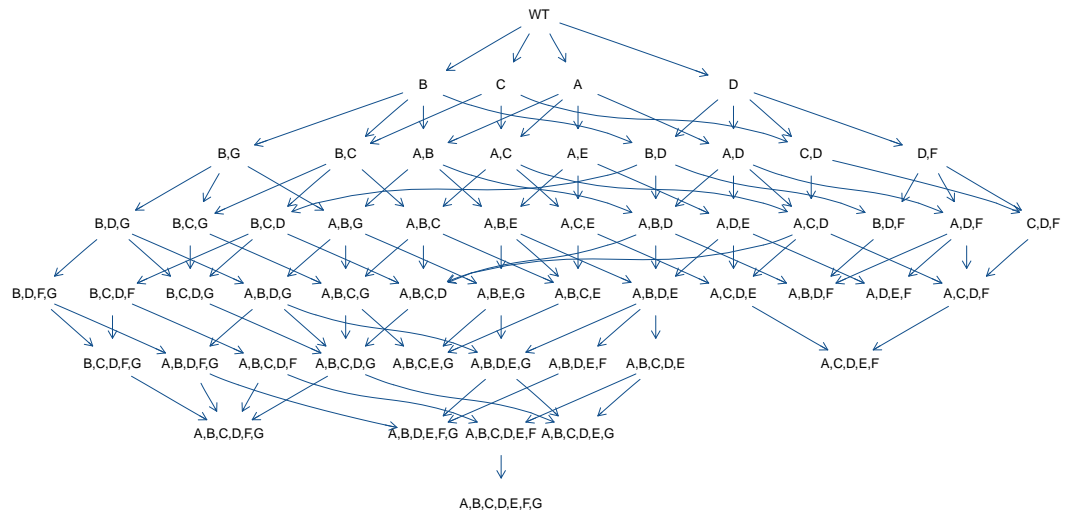

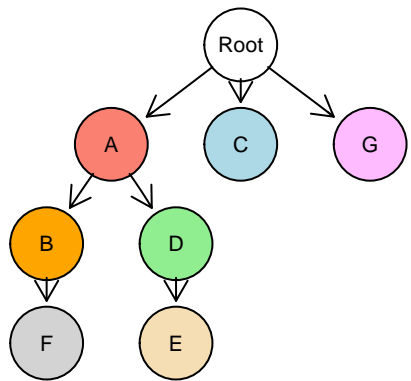

ID **vDqUv4dtGloB94NH**  
 acc genotypes **40**  
 peaks no back **8**  
 removed edges **13**  
 prop rem edges **0.141**

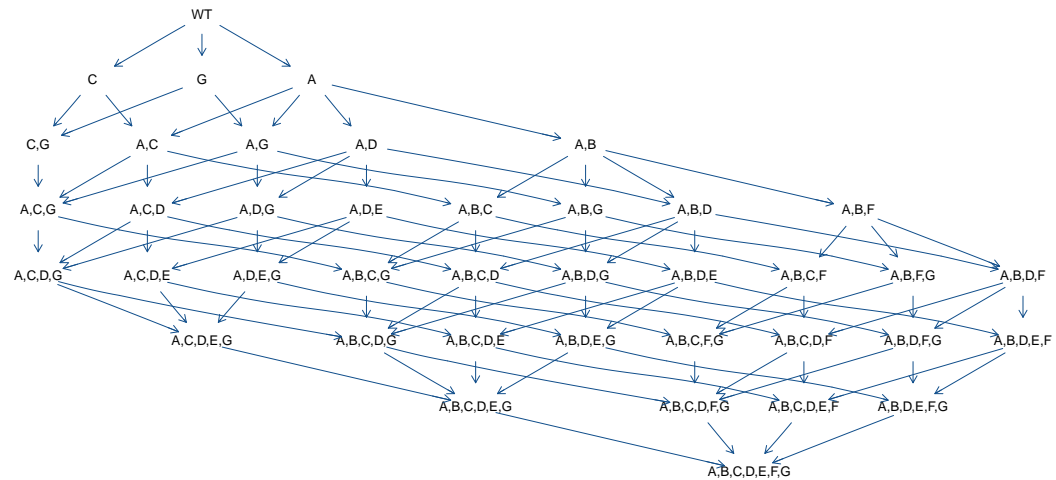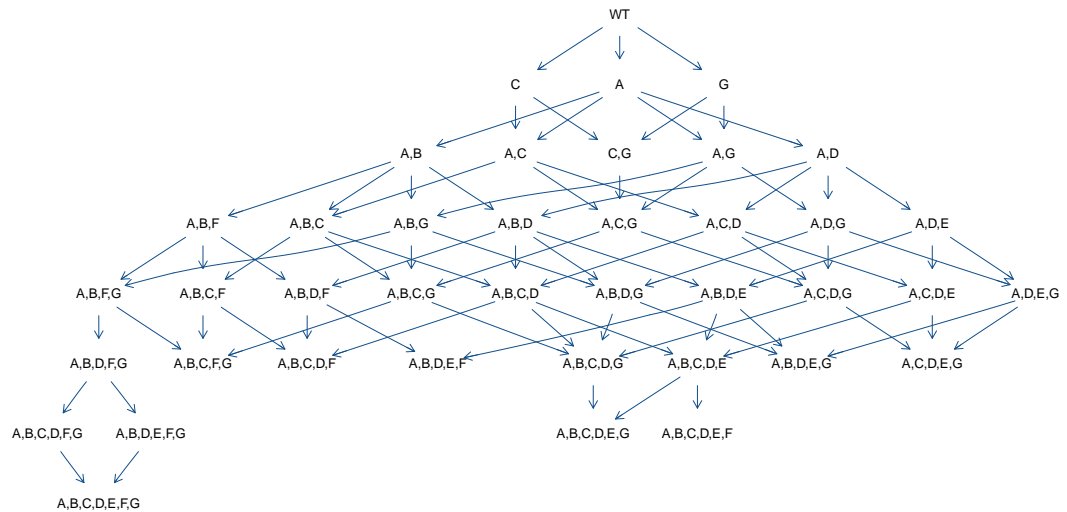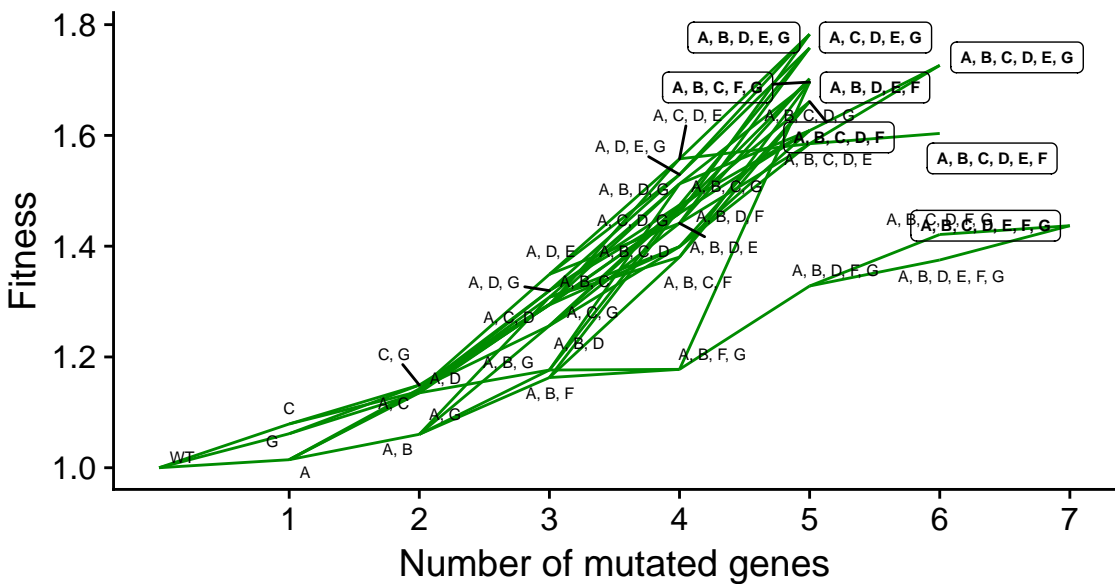

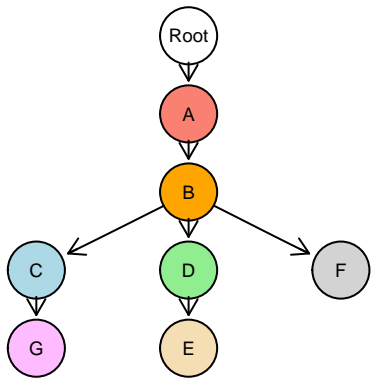

*ID* VIFJpVZjq2HKeP6z  
*acc genotypes* 20  
*peaks no back* 5  
*removed edges* 8  
*prop rem edges* 0.229

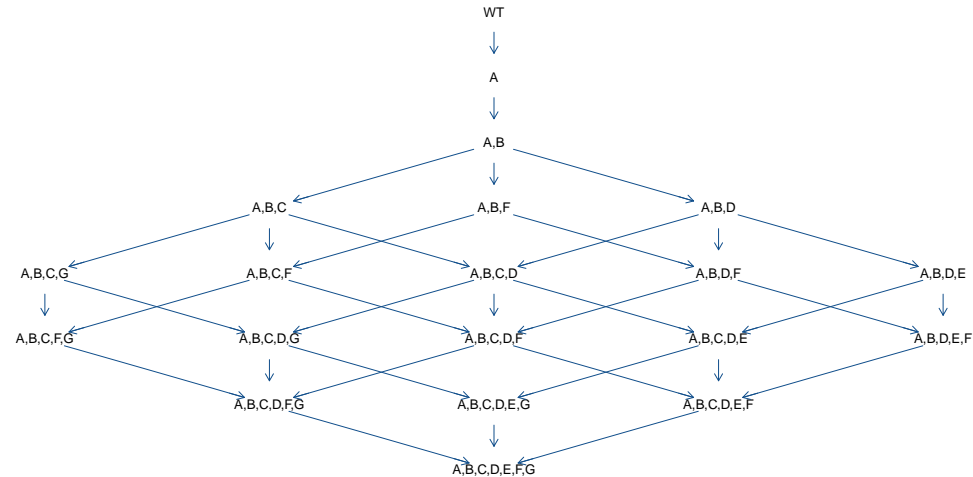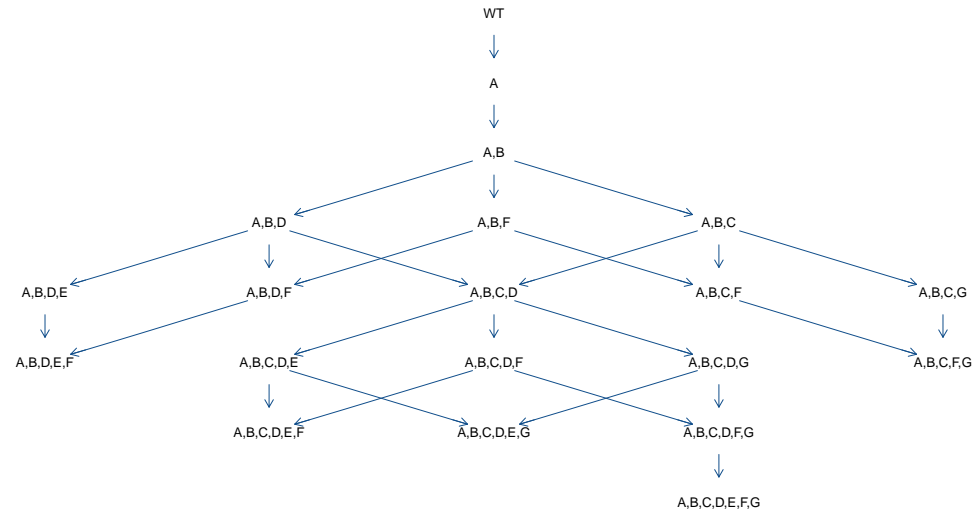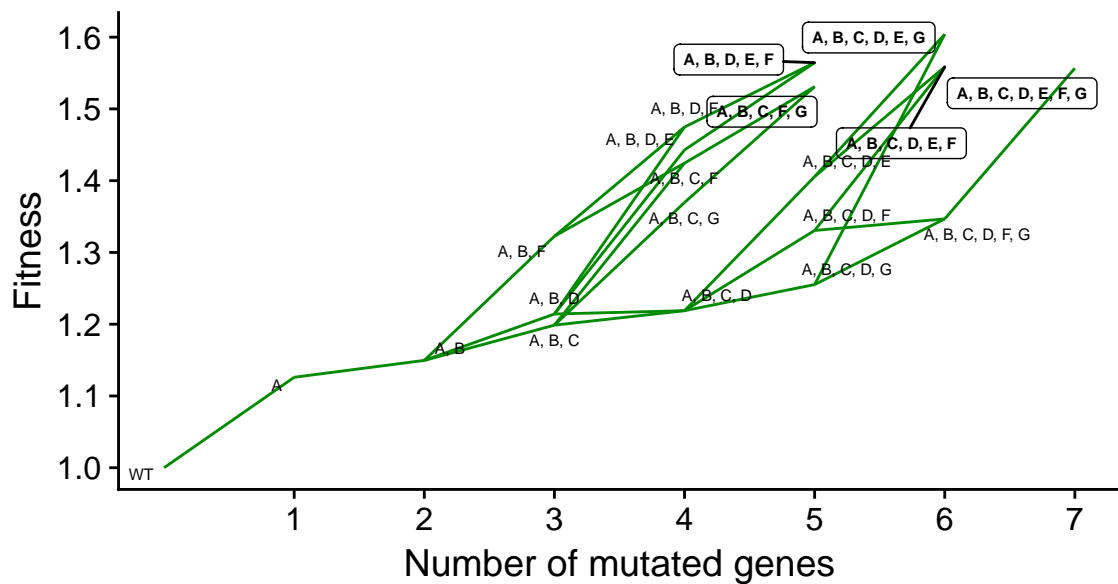



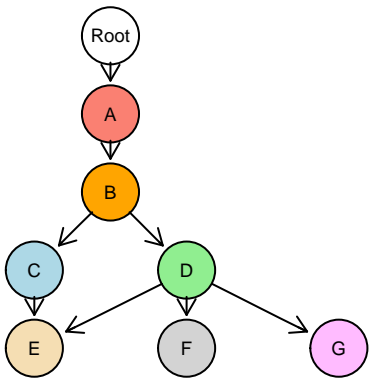

ID **VqVZDFELXTXwJzx10**  
 acc genotypes **16**  
 peaks no back **3**  
 removed edges **2**  
 prop rem edges **0.08**

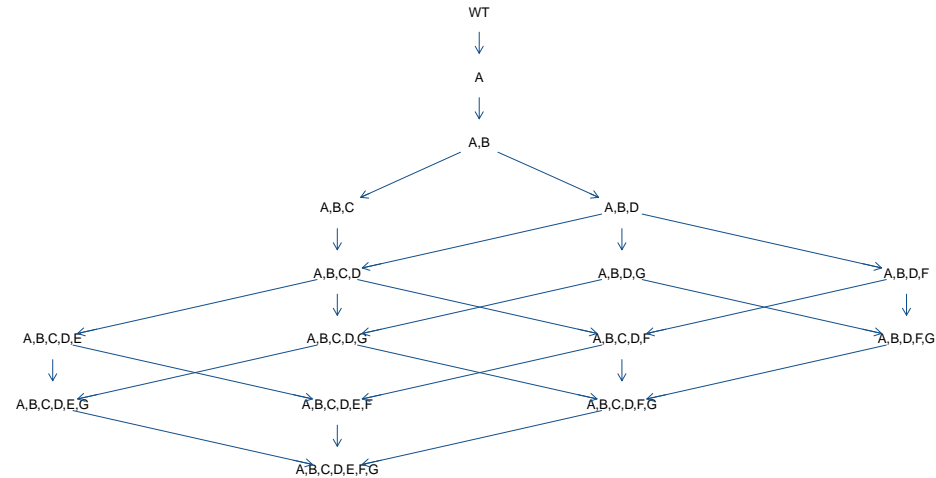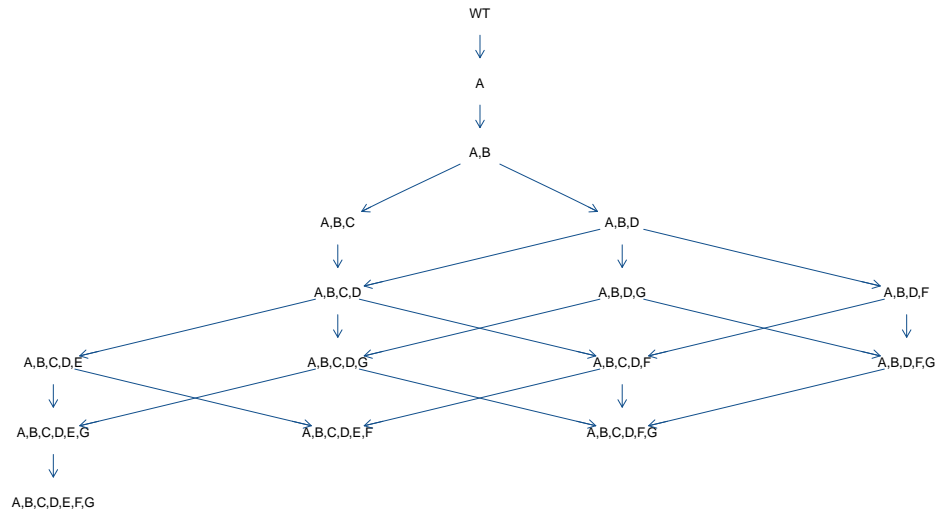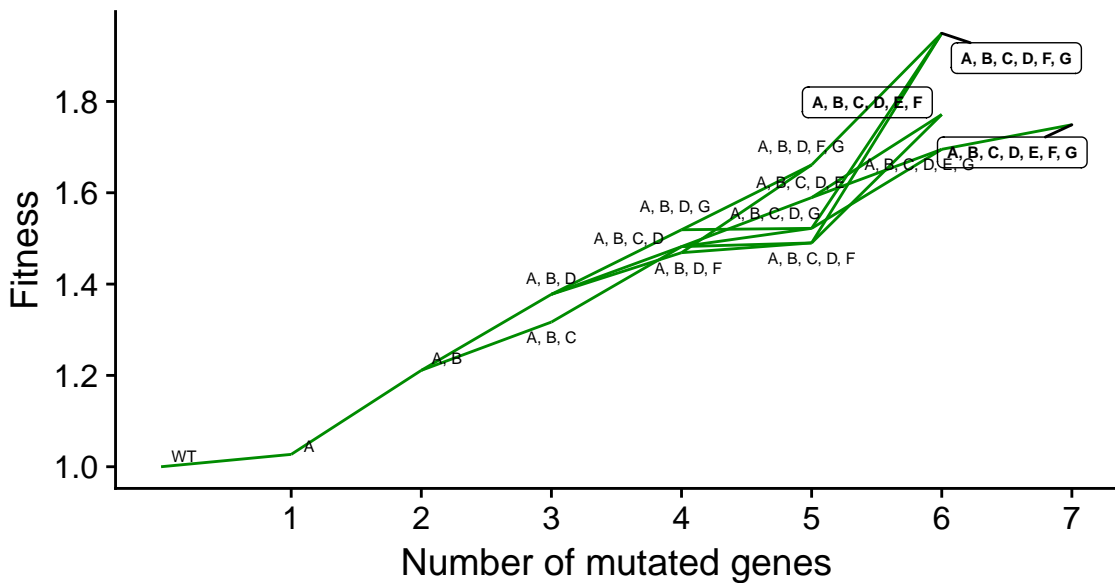





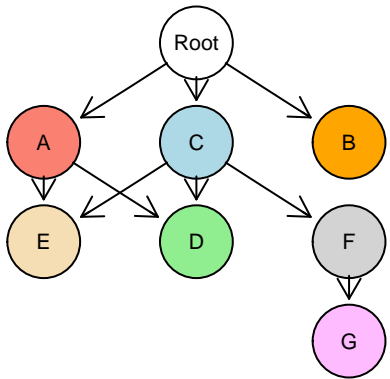

ID **VYKTwc6PGOf05RH5**  
 acc genotypes **34**  
 peaks no back **5**  
 removed edges **12**  
 prop rem edges **0.164**

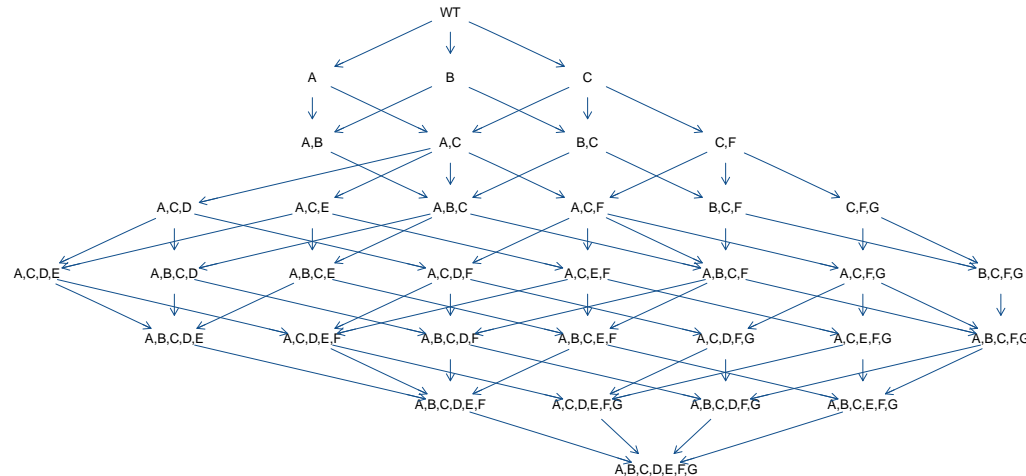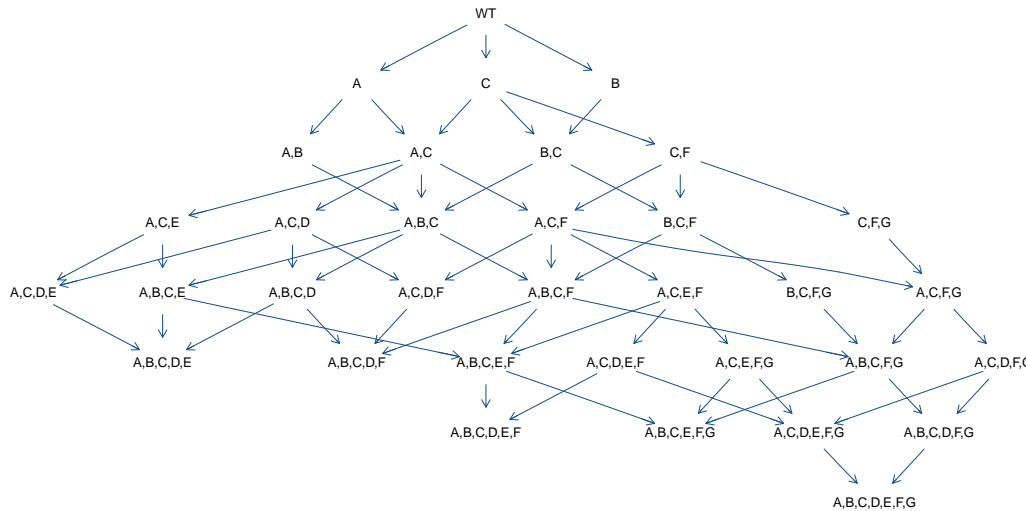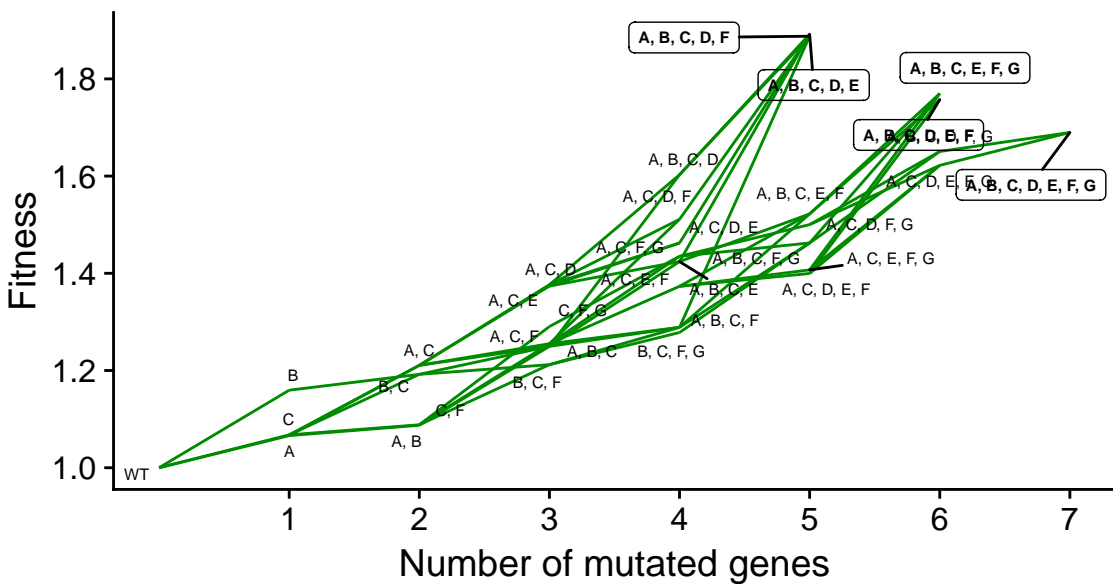

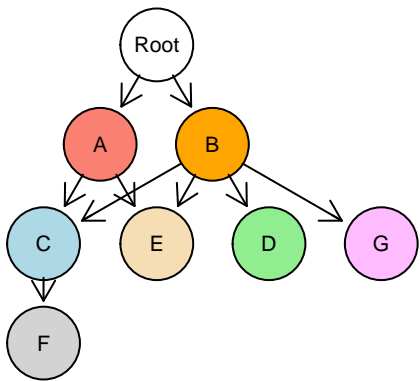

ID [vz7pdw2T4KJ7Ey10T](#)  
 acc genotypes 30  
 peaks no back 6  
 removed edges 14  
 prop rem edges 0.222

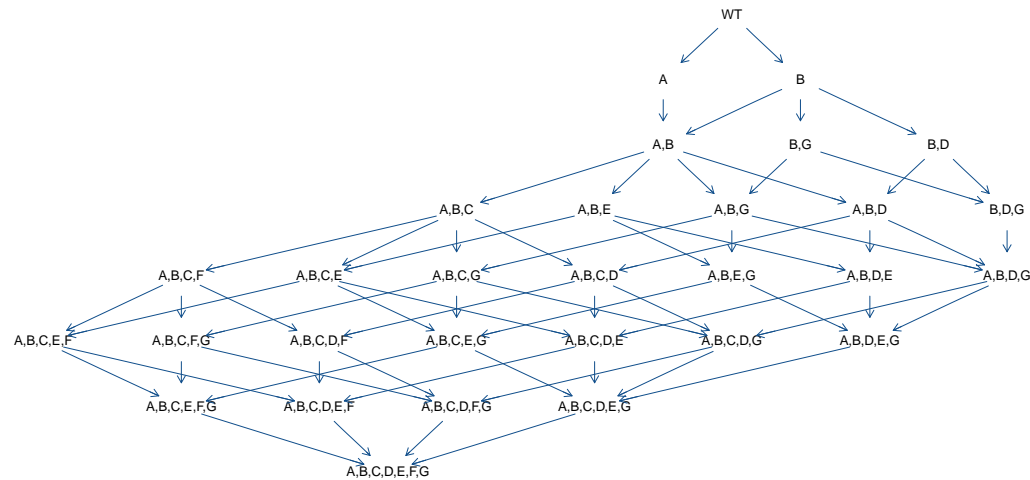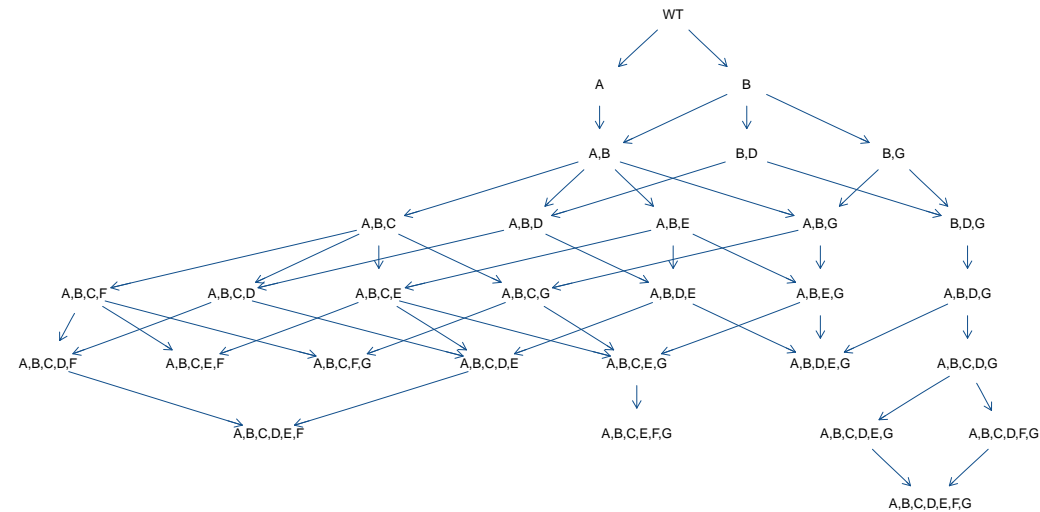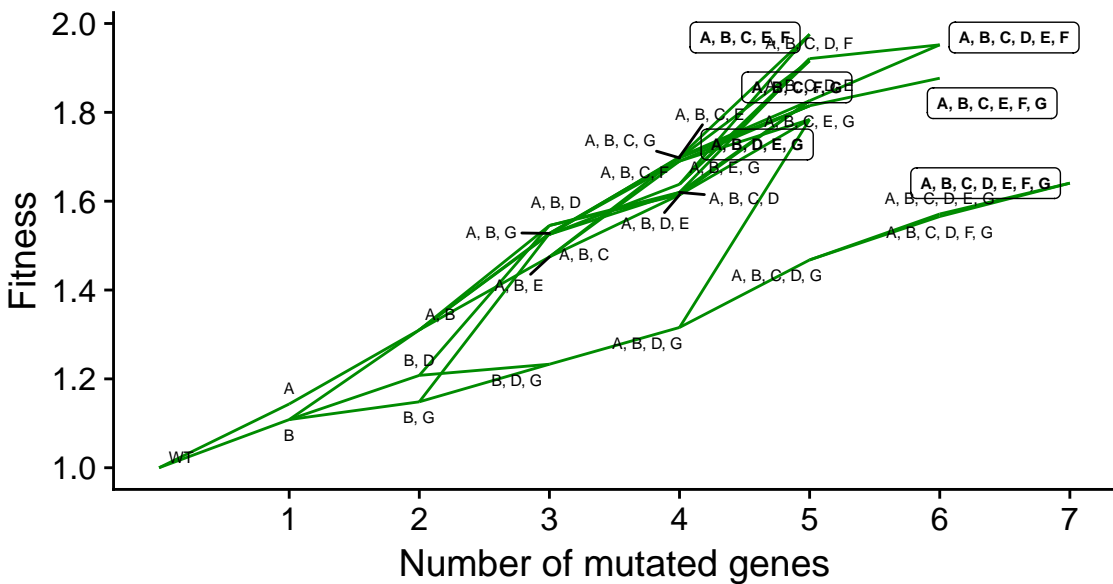

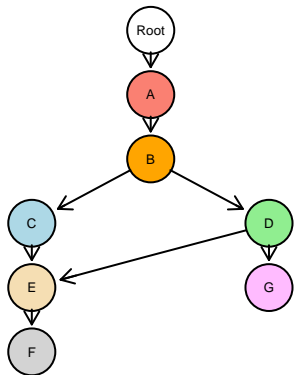

ID WCthf7pnLrf65210C  
 acc genotypes 12  
 peaks no back 2  
 removed edges 1  
 prop rem edges 0.067

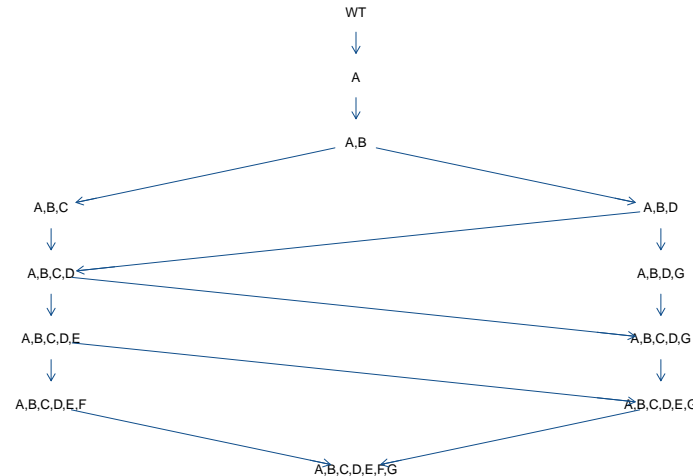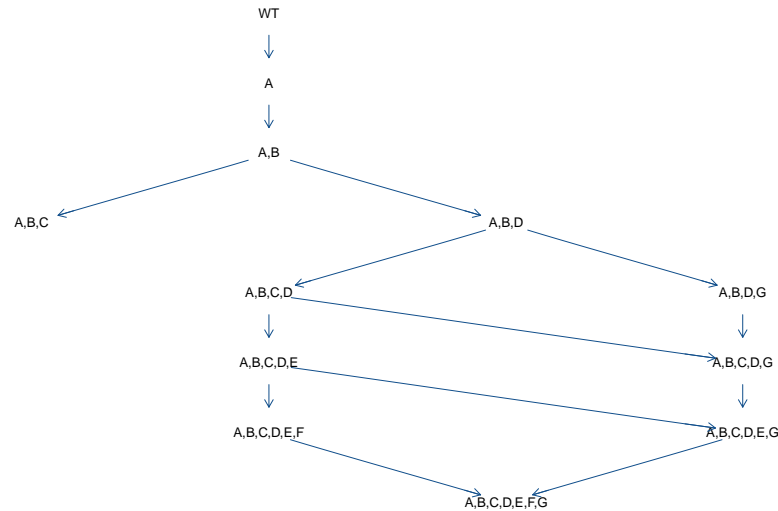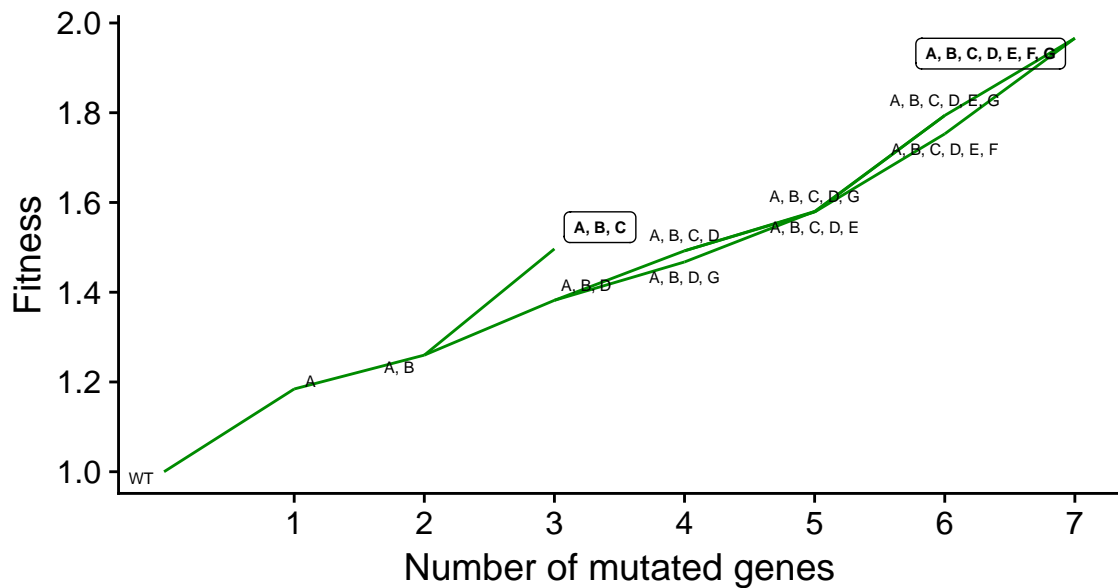

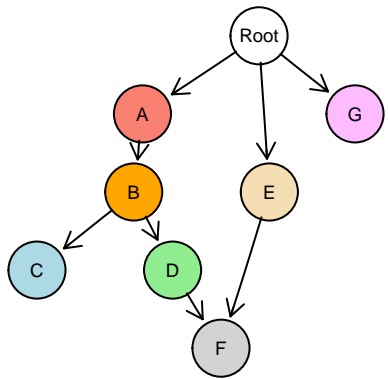

ID **wGM2GvMSYVAE2KwT**  
 acc genotypes **28**  
 peaks no back **6**  
 removed edges **13**  
 prop rem edges **0.232**

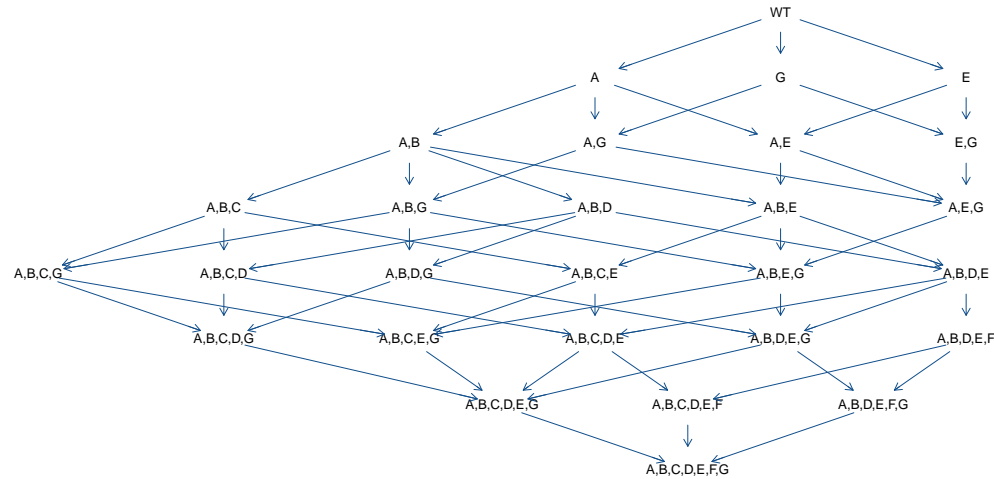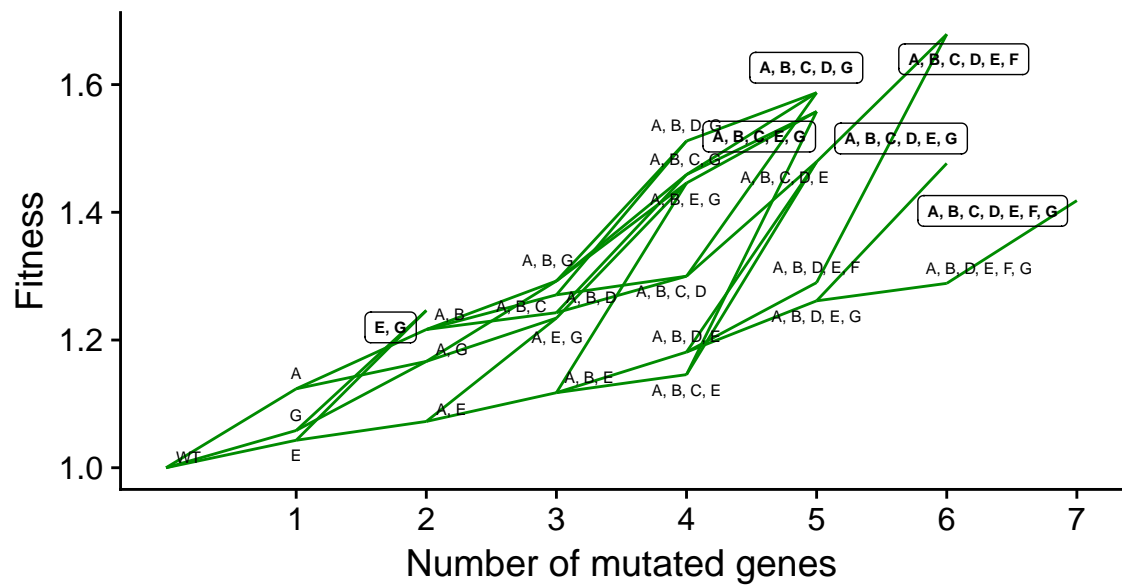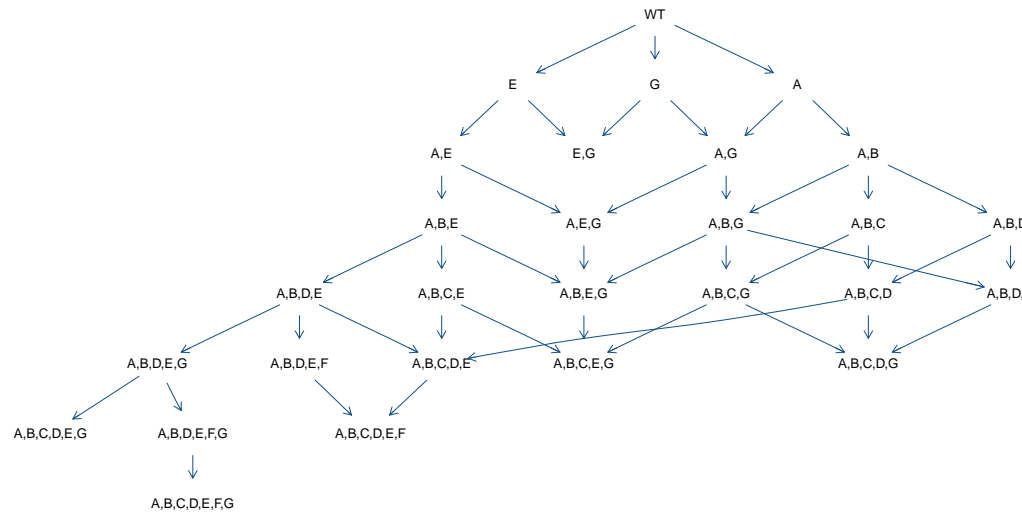

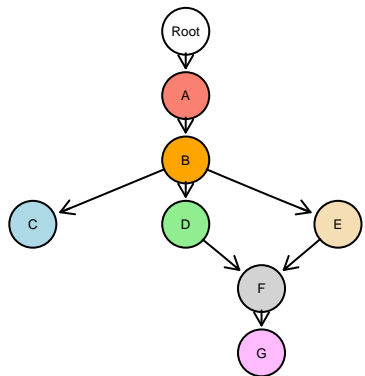

ID **WpF105HbEDoECa8vs**  
 acc genotypes **14**  
 peaks no back **2**  
 removed edges **1**  
 prop rem edges **0.05**

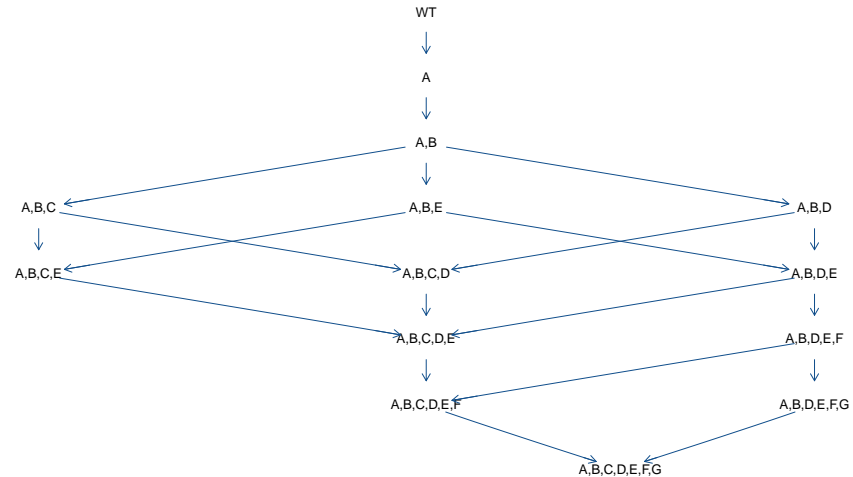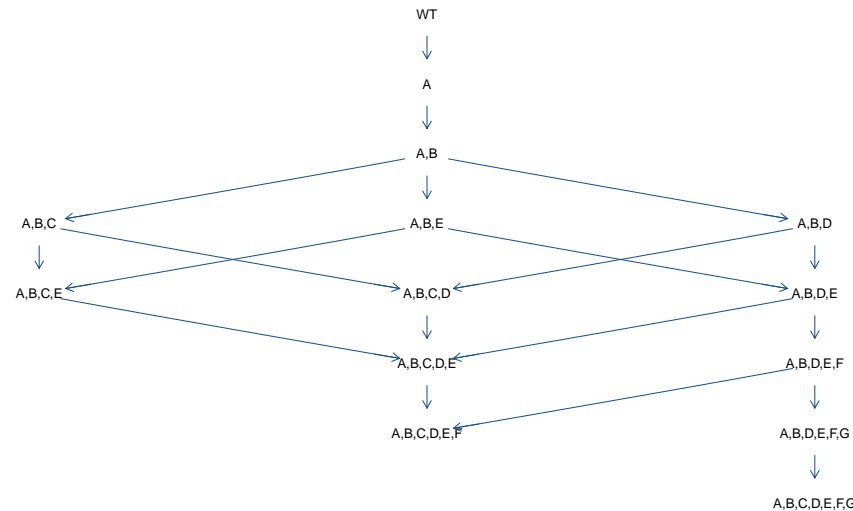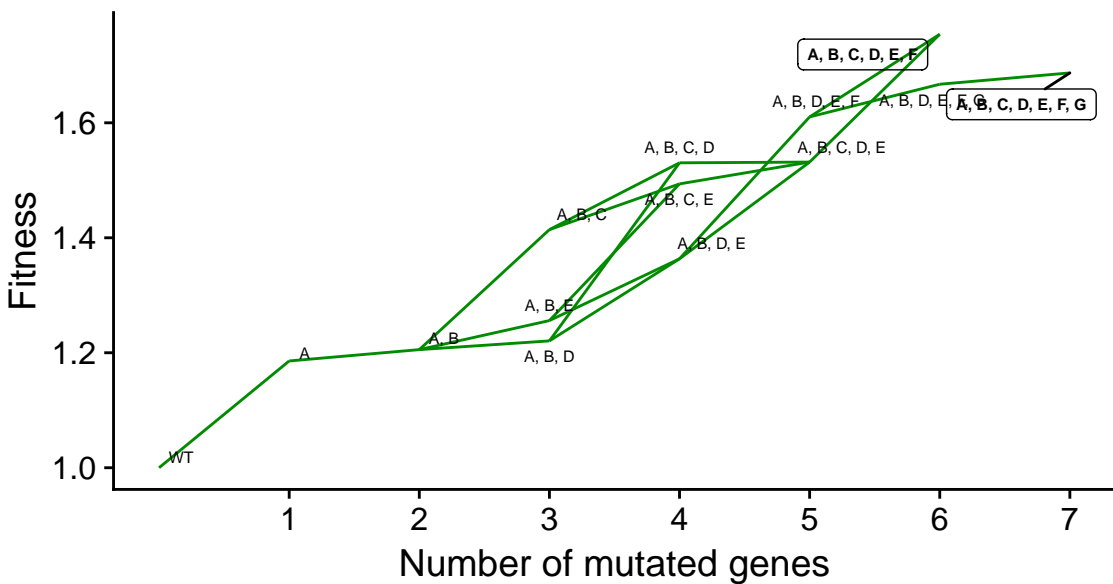

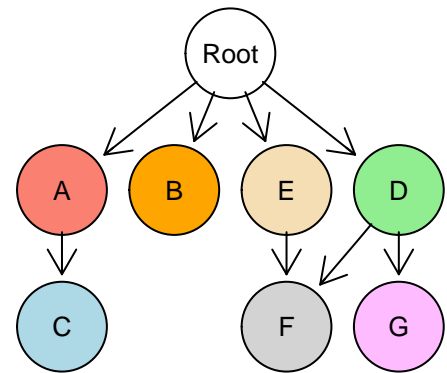

ID Wv6VdQ7KvmRODig4  
 acc genotypes 48  
 peaks no back 7  
 removed edges 17  
 prop rem edges 0.147

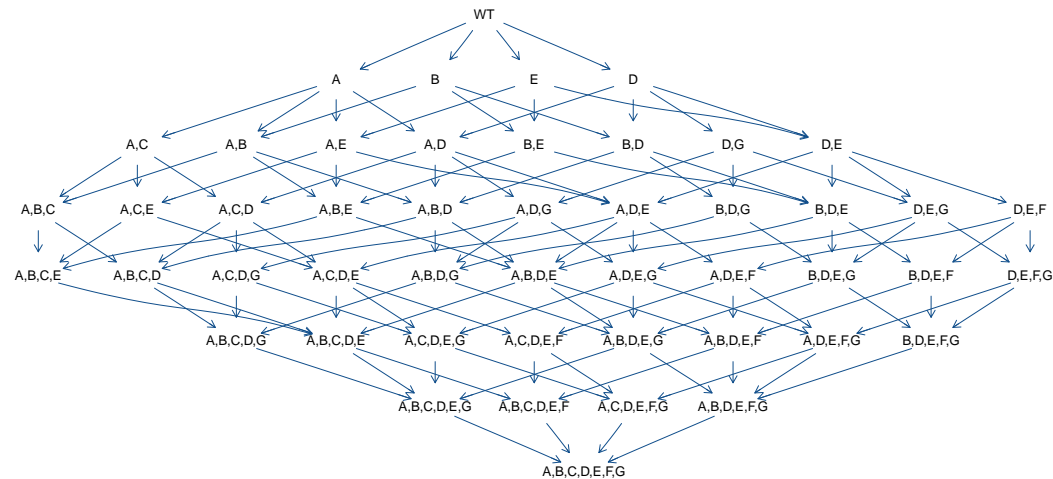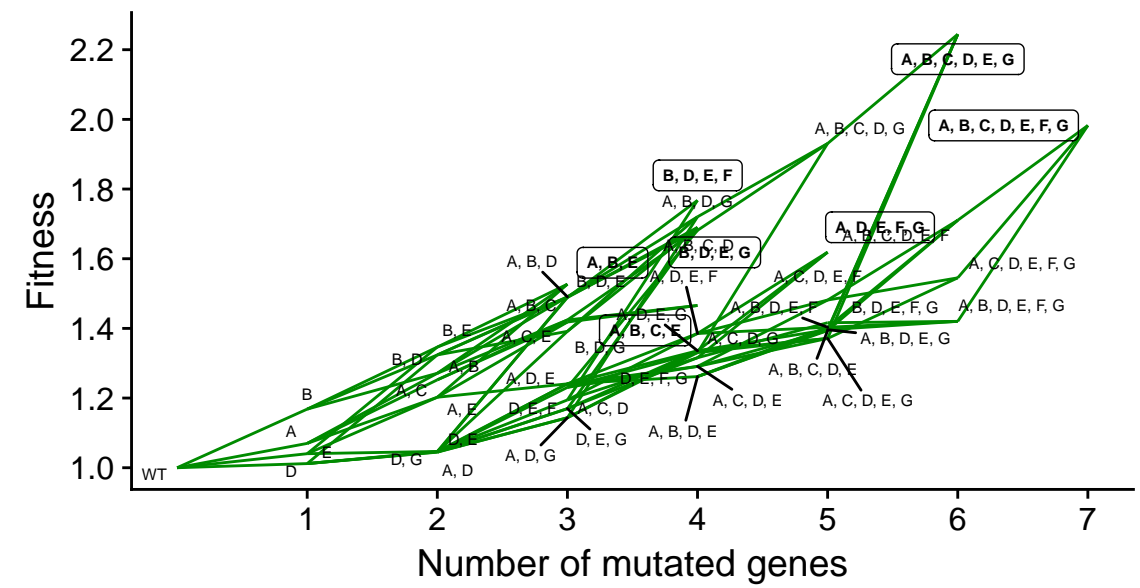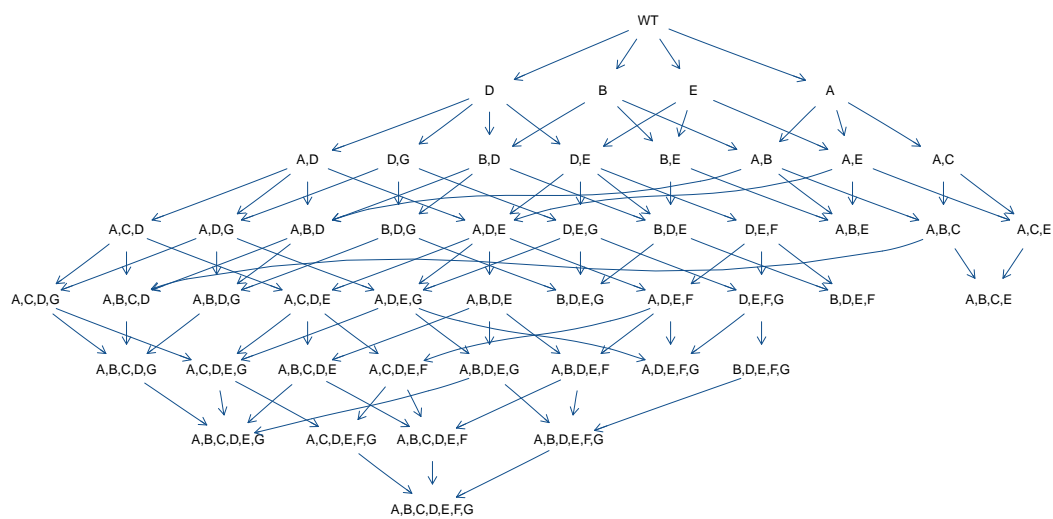

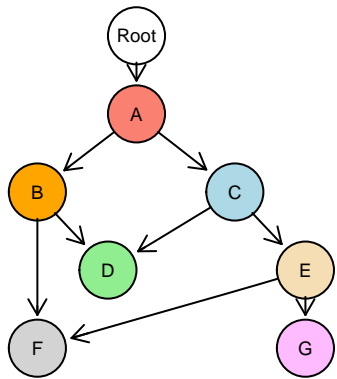

ID **wXZP1BcX68smcT7W**  
 acc genotypes **16**  
 peaks no back 4  
 removed edges 4  
 prop rem edges 0.167

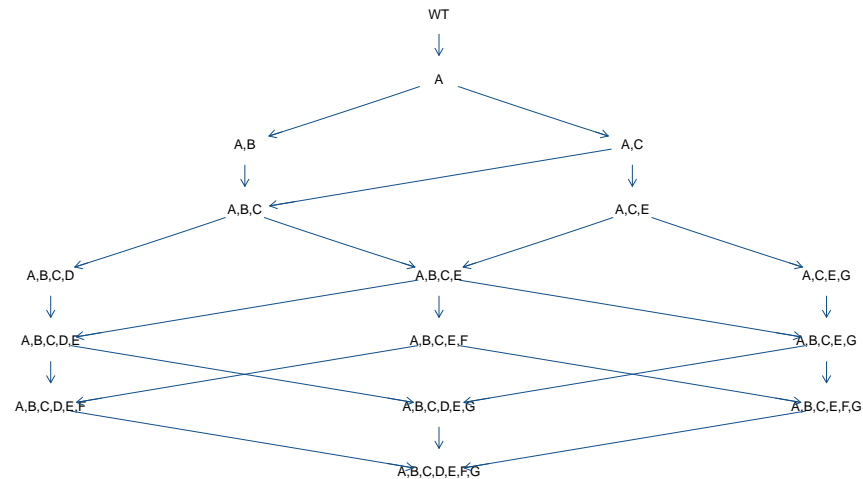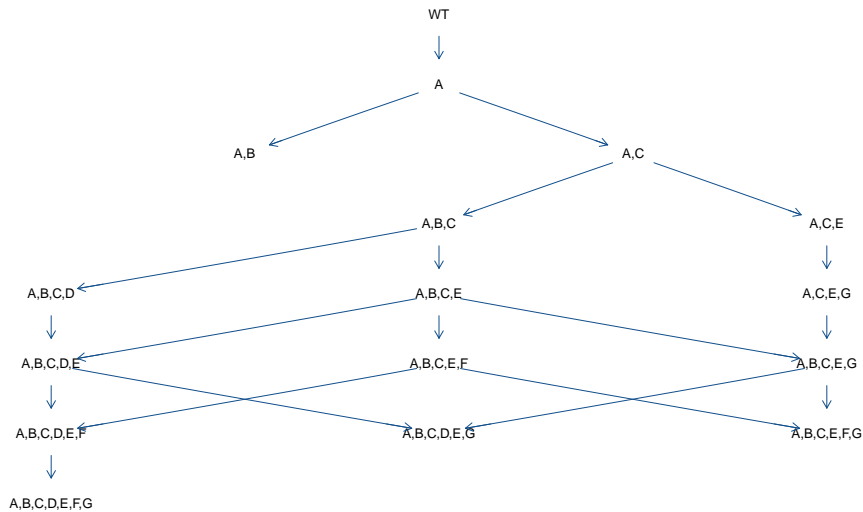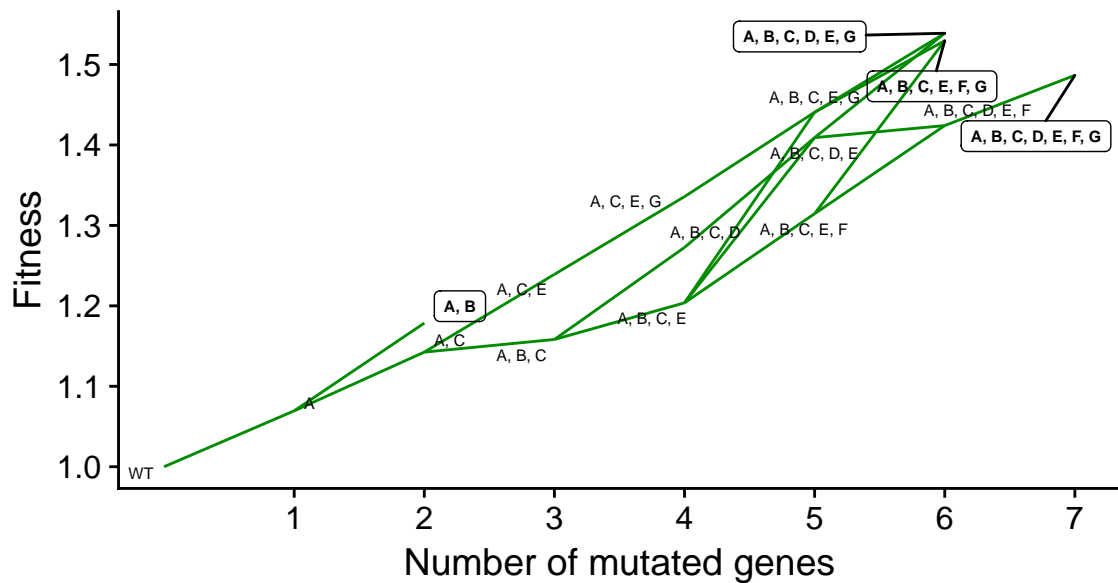





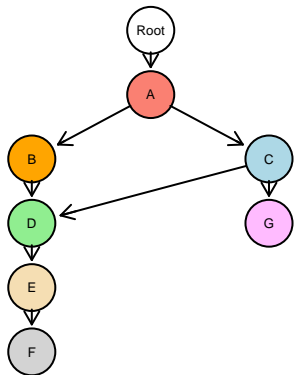

ID **wzBFbd7oN5KHrhdR**  
 acc genotypes **13**  
 peaks no back **2**  
 removed edges **1**  
 prop rem edges **0.059**

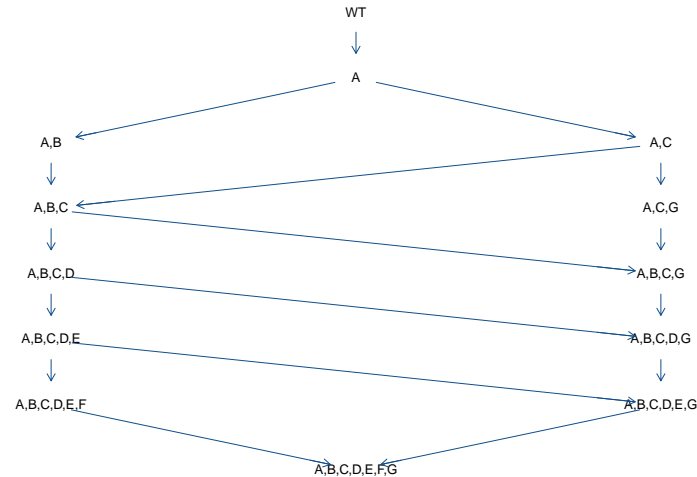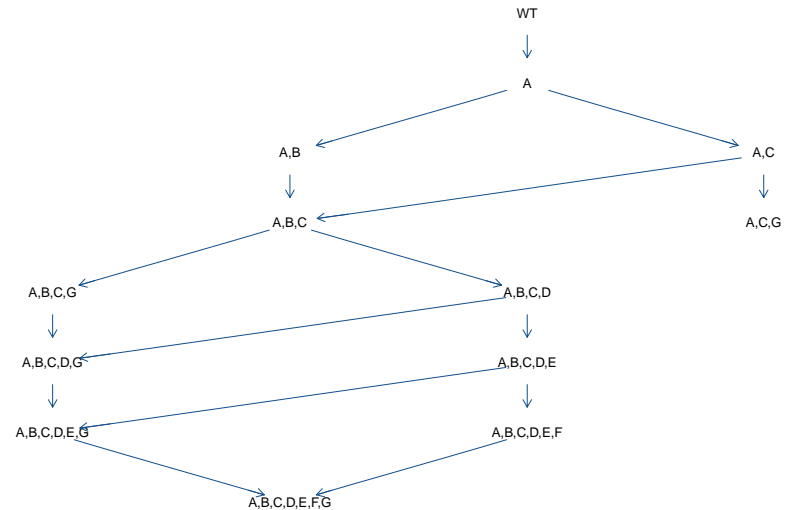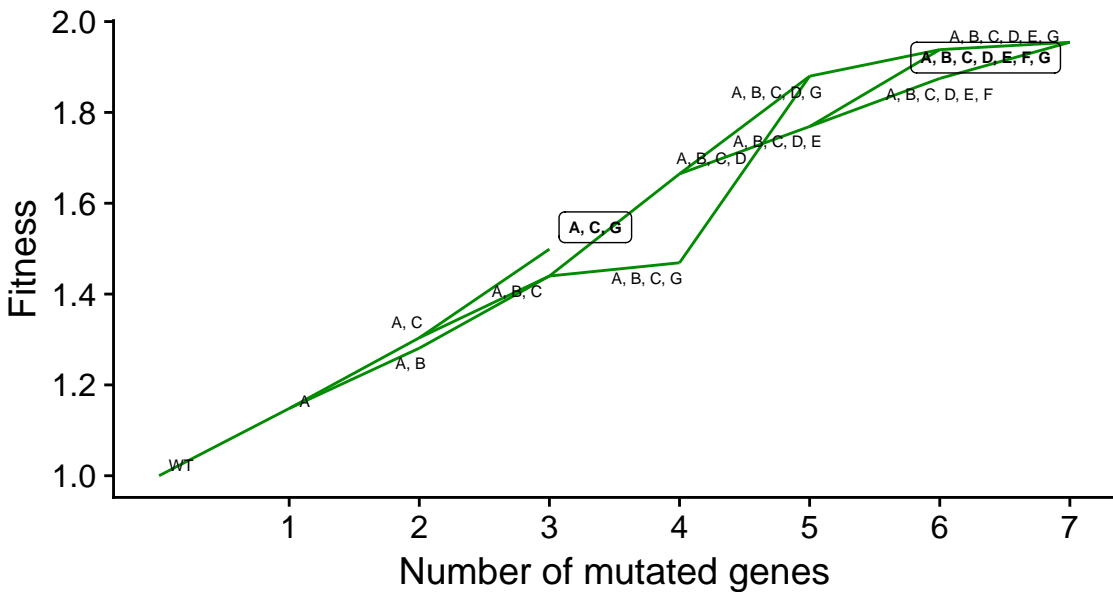

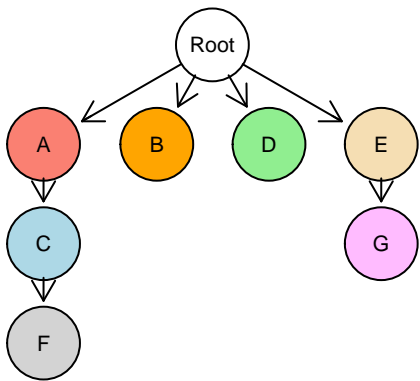

ID [X10HPXEjtf2hUa711](#)  
 acc genotypes 48  
 peaks no back 9  
 removed edges 27  
 prop rem edges 0.233

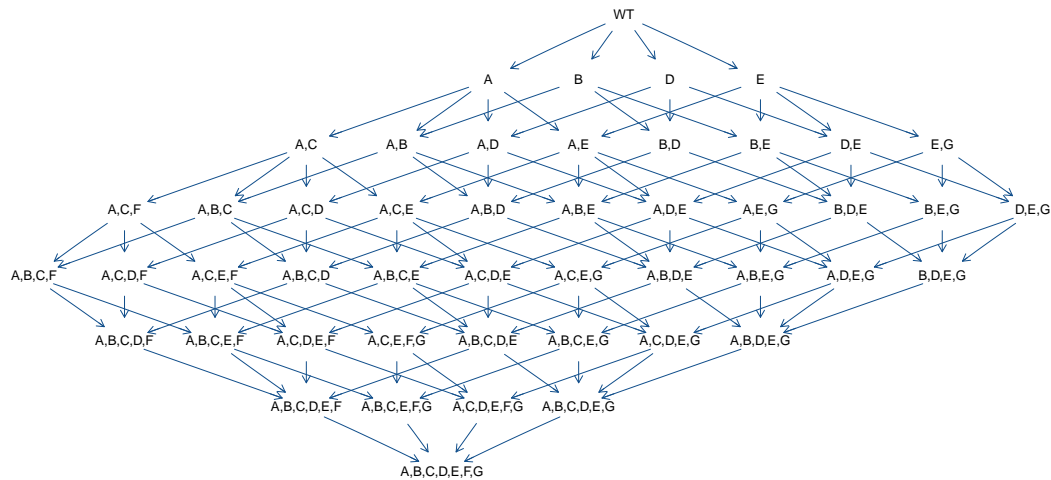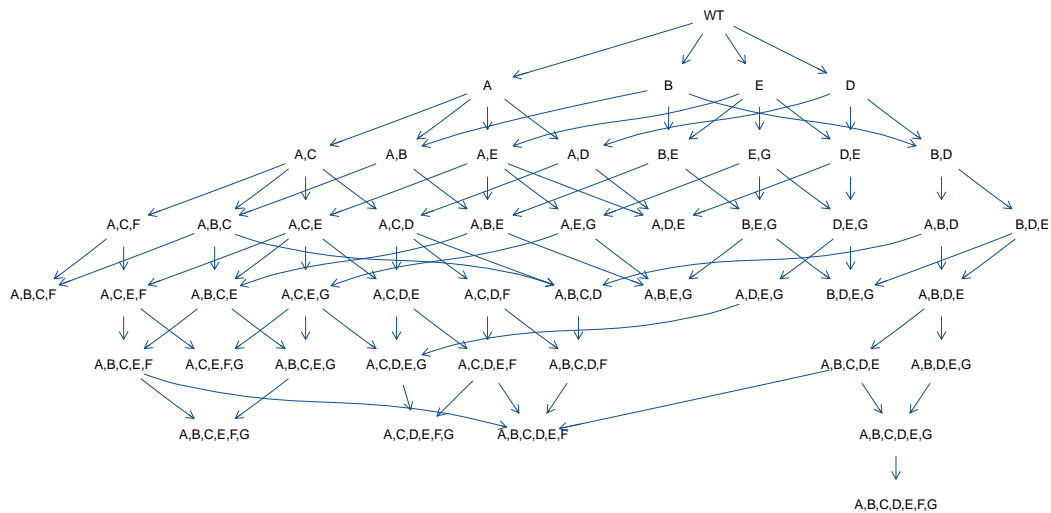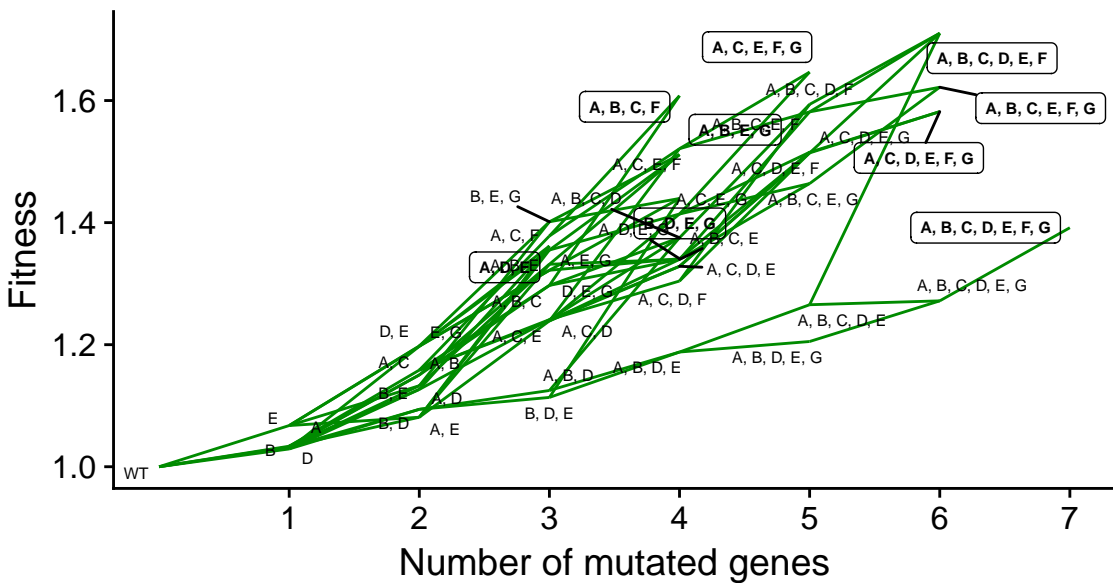

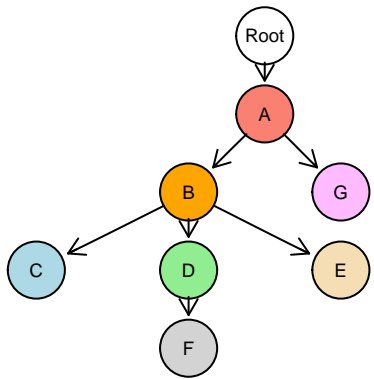

ID **x2Dh5bR5ksqmvSQp**  
 acc genotypes **27**  
 peaks no back **5**  
 removed edges **14**  
 prop rem edges **0.25**

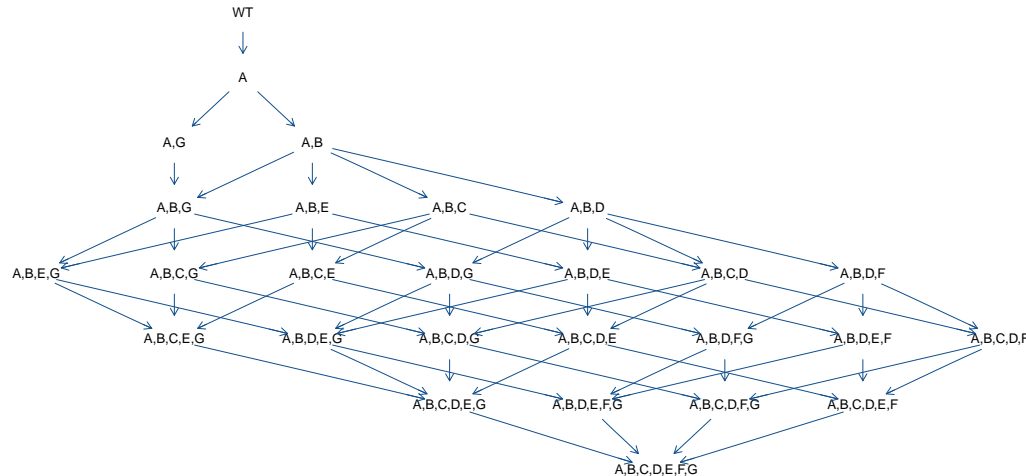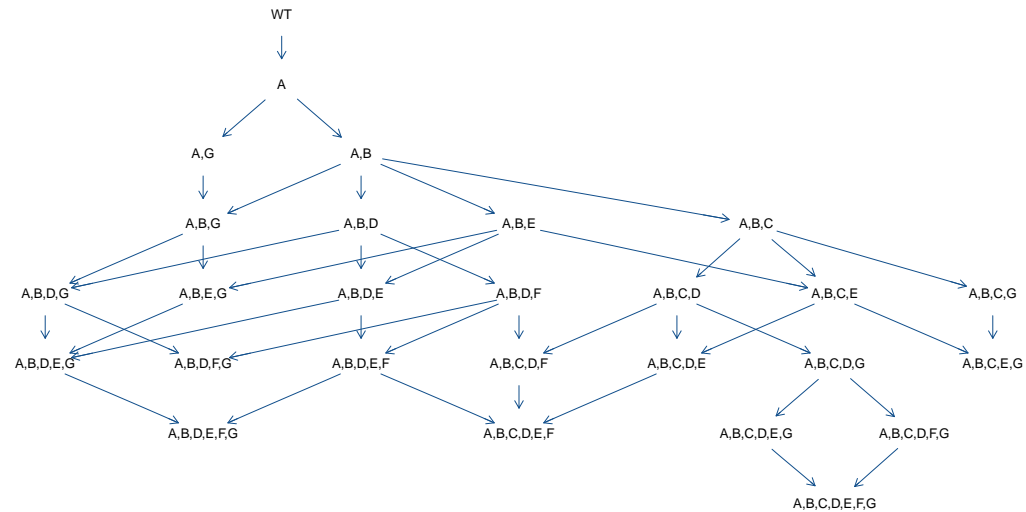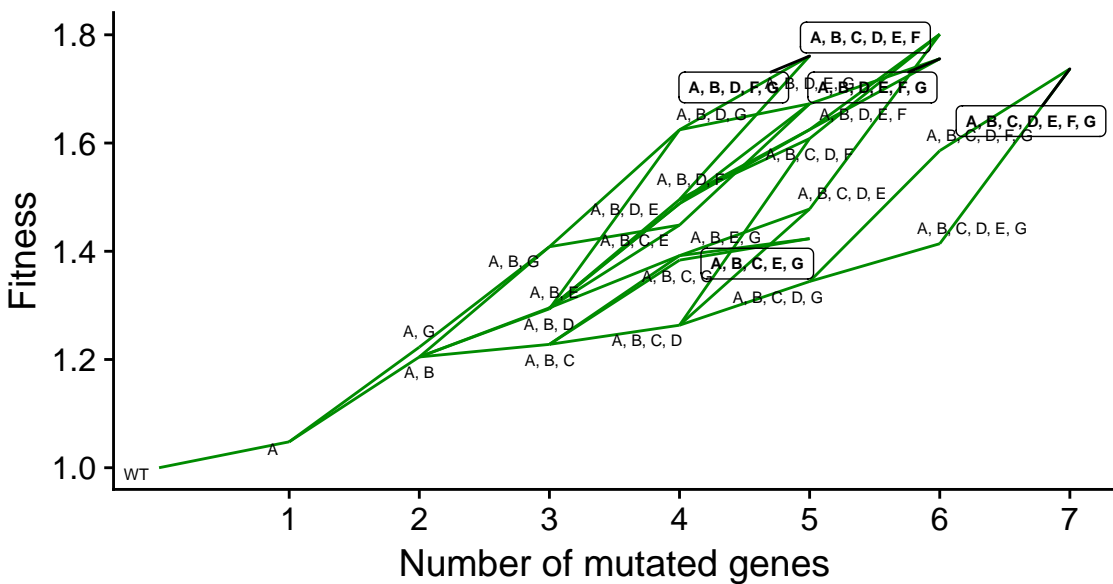

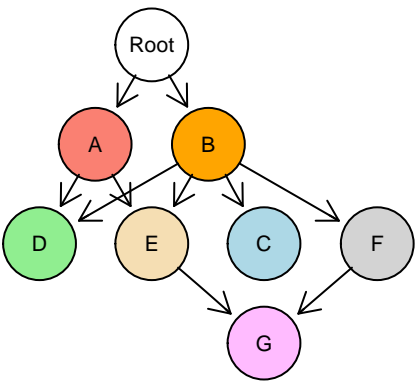

ID [XkAnRtxPG4FT103ju](#)  
 acc genotypes 26  
 peaks no back 6  
 removed edges 12  
 prop rem edges 0.235

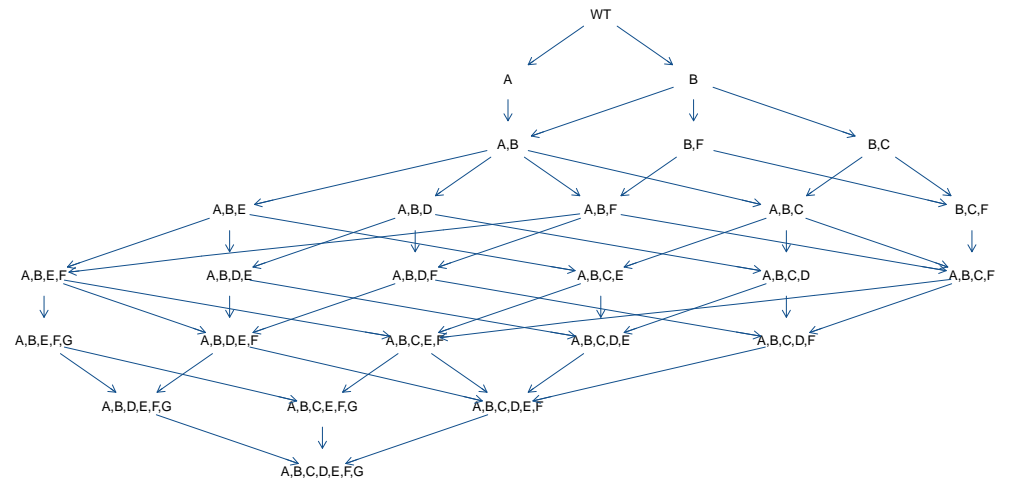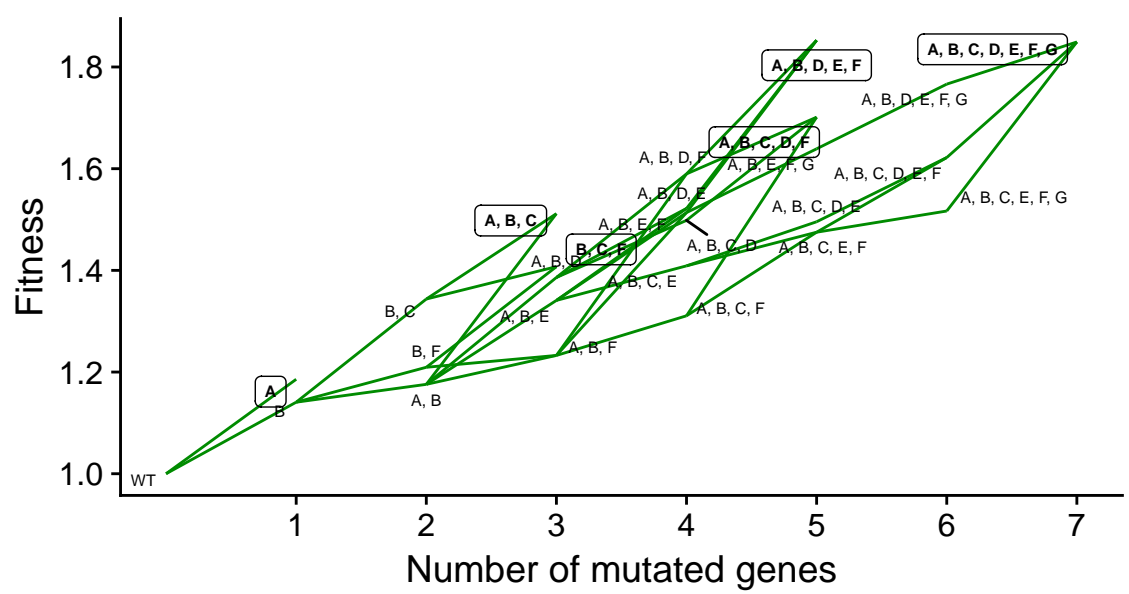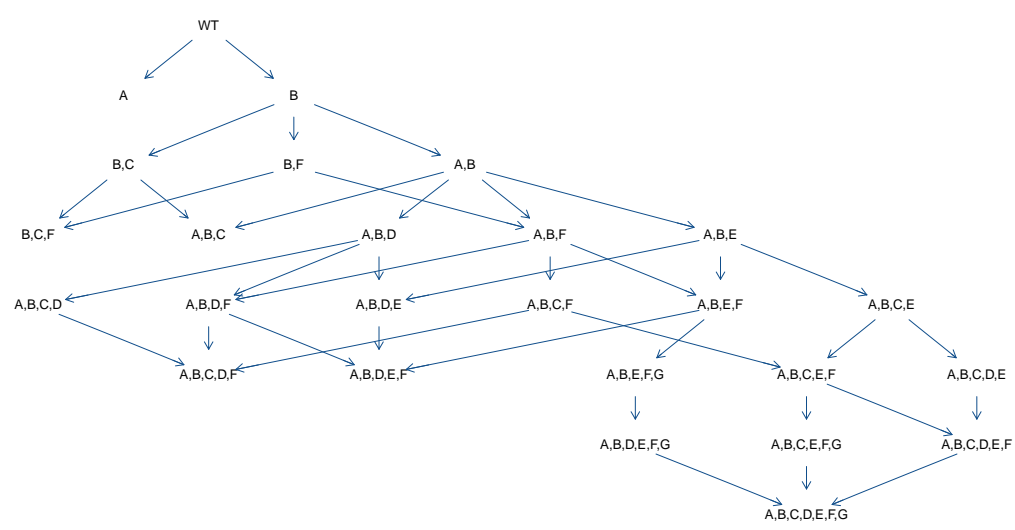

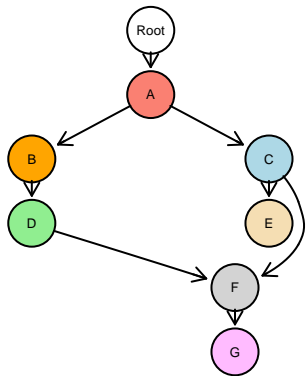

ID XMtNwZBJ7EWu8yH7  
 acc genotypes 14  
 peaks no back 2  
 removed edges 2  
 prop rem edges 0.105

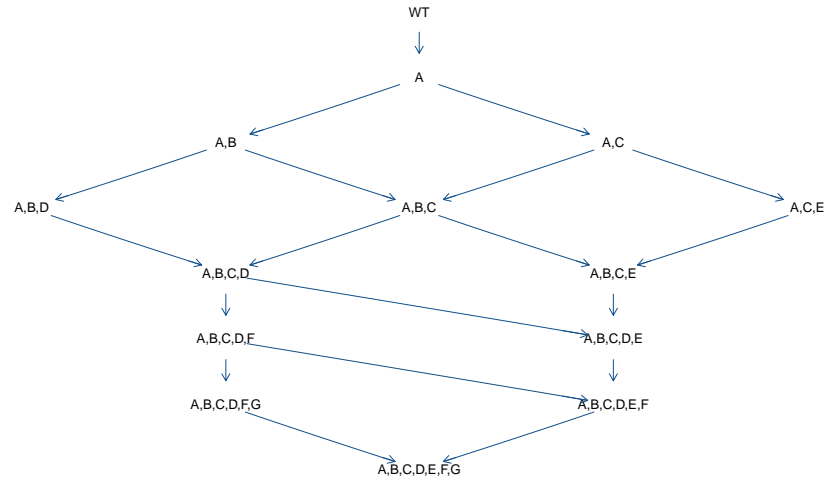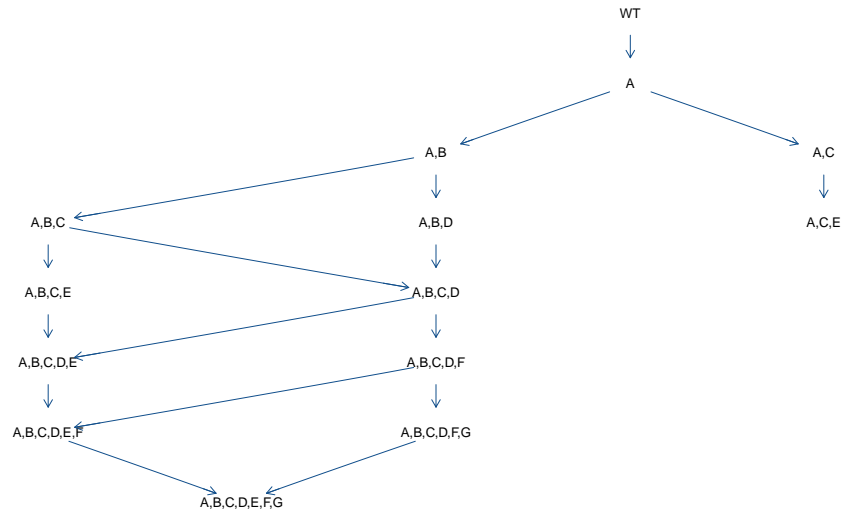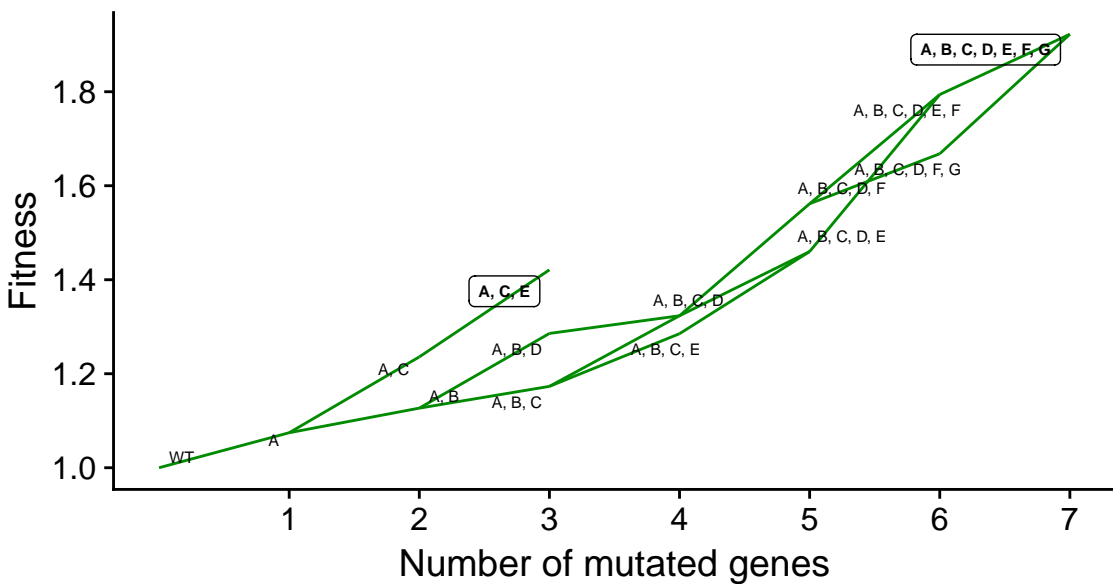

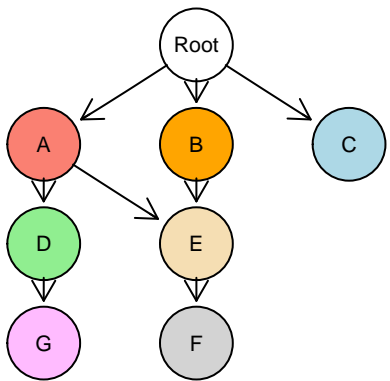

ID xN6jmjSdIYDI6ALK  
 acc genotypes 28  
 peaks no back 3  
 removed edges 5  
 prop rem edges 0.093

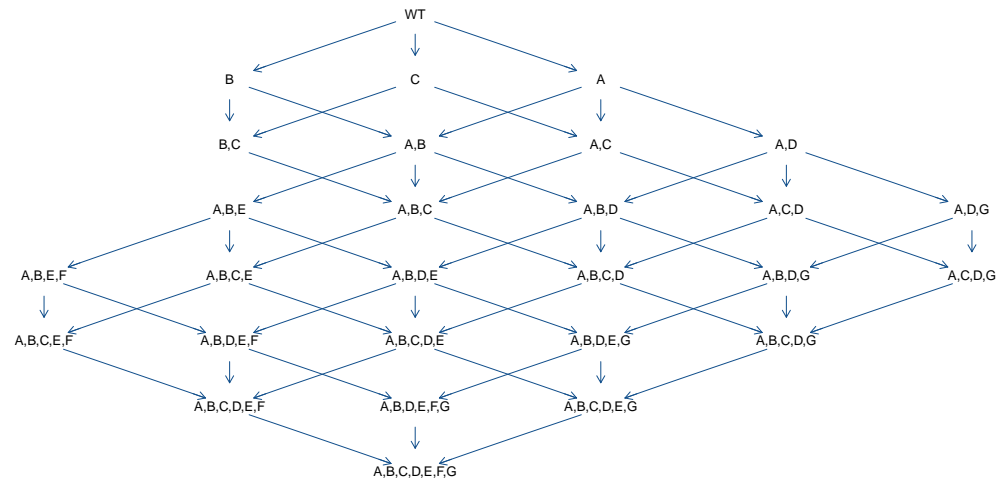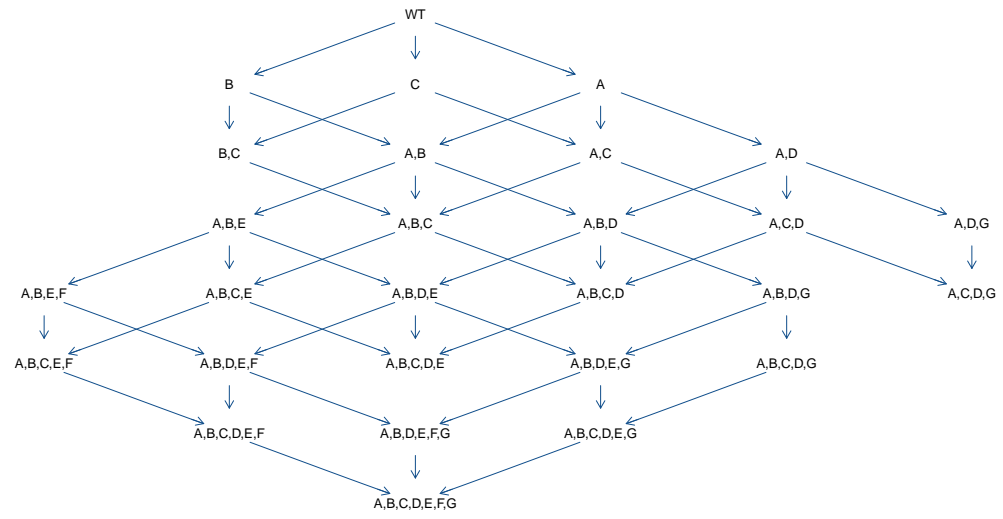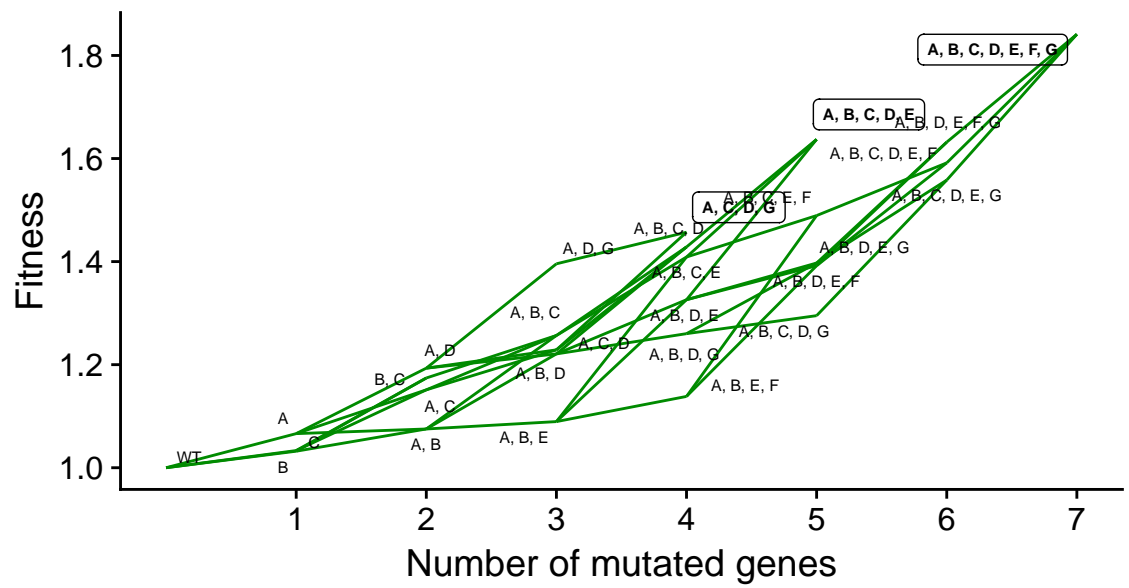

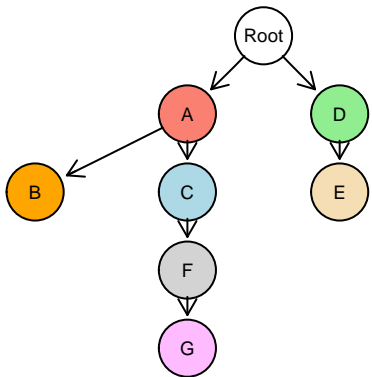

ID **xQCUt6eox10t8NYNj**  
 acc genotypes **27**  
 peaks no back **5**  
 removed edges **7**  
 prop rem edges **0.137**

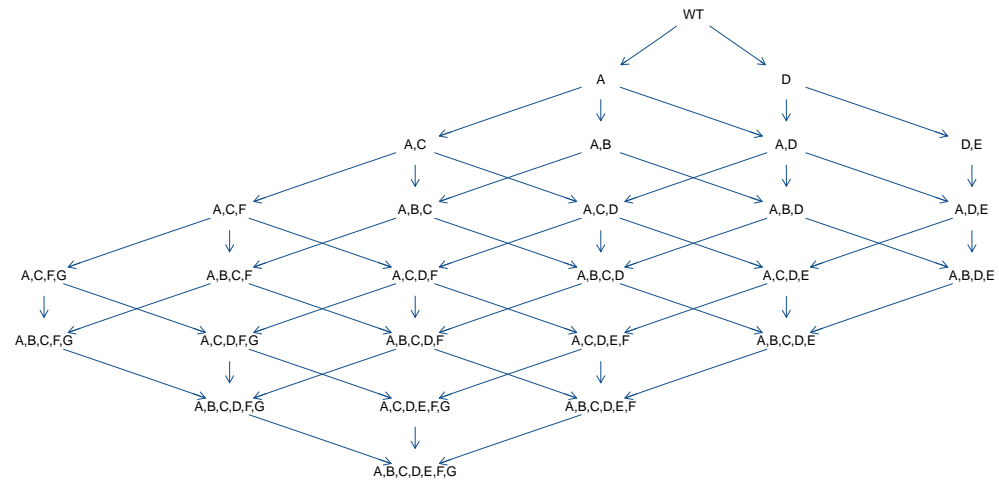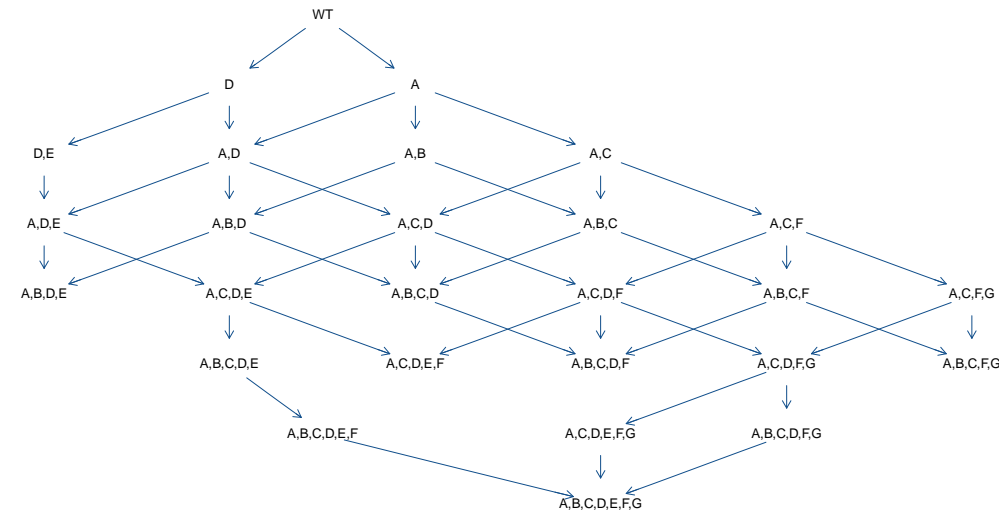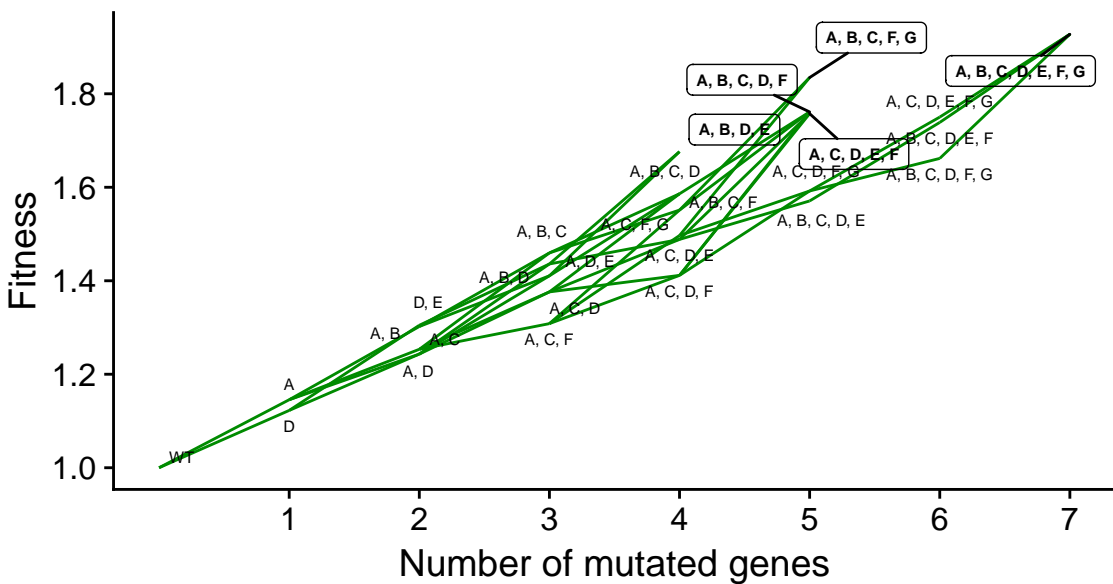

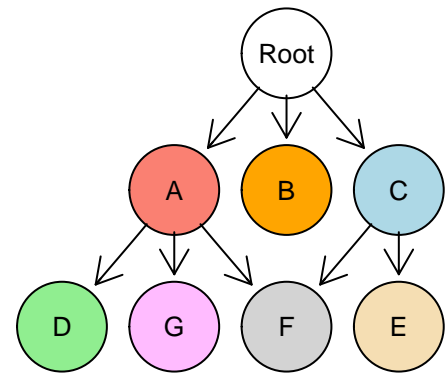

ID [xsLEpm8mUqbWuEtX](#)  
 acc genotypes 46  
 peaks no back 6  
 removed edges 22  
 prop rem edges 0.195

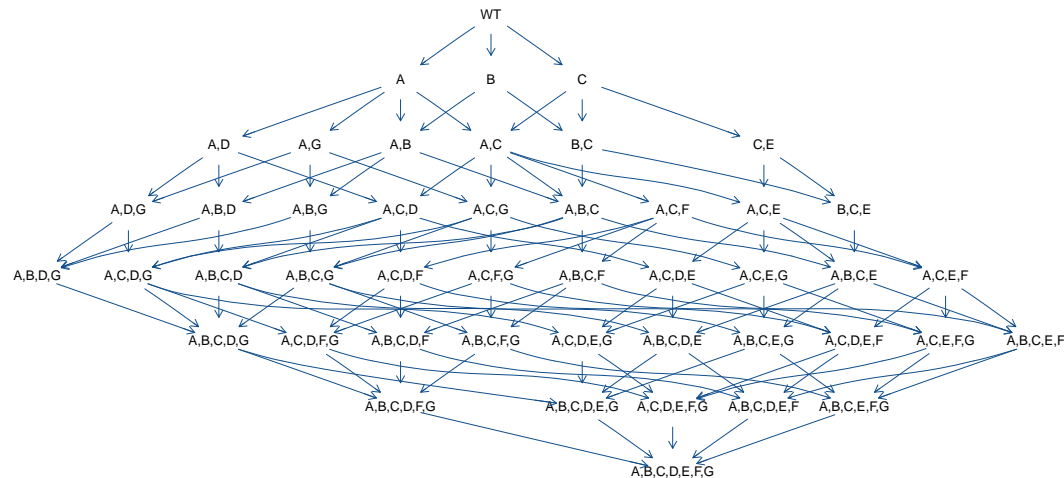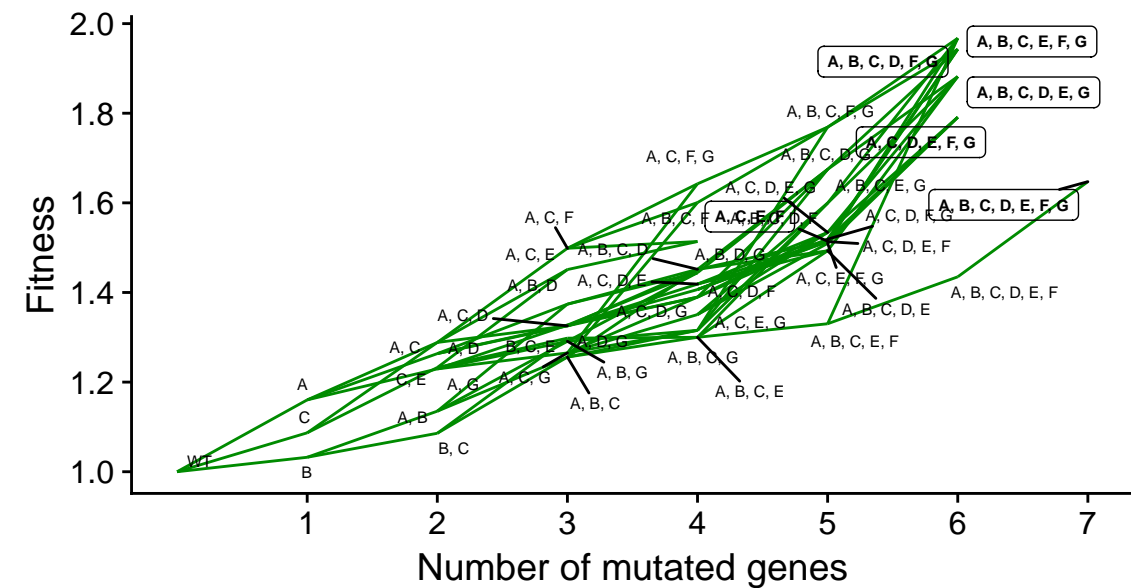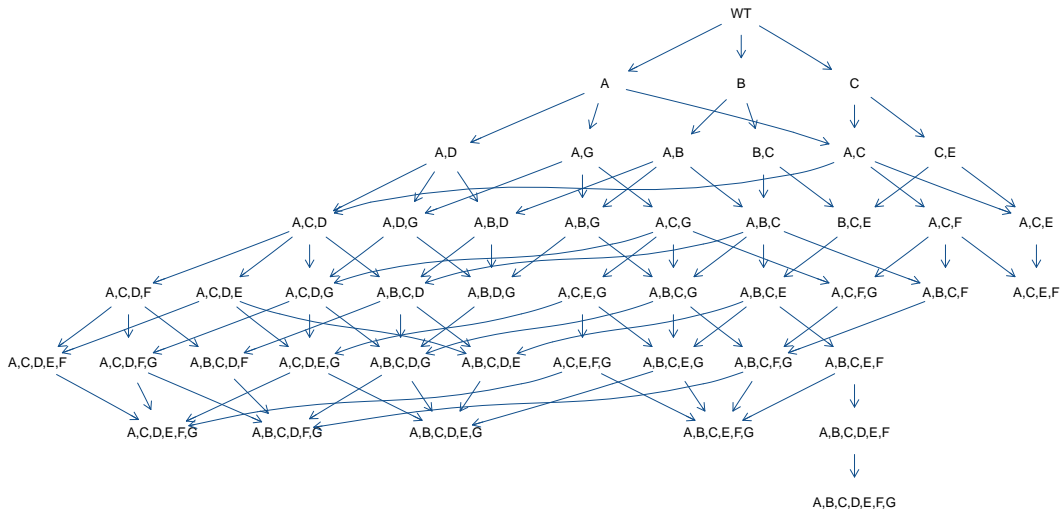



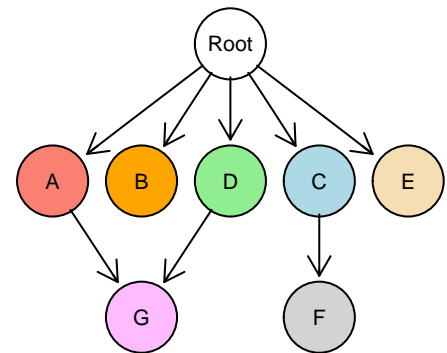

ID XUvwmwc1Jrh7g5gR  
 acc genotypes 60  
 peaks no back 7  
 removed edges 26  
 prop rem edges 0.162

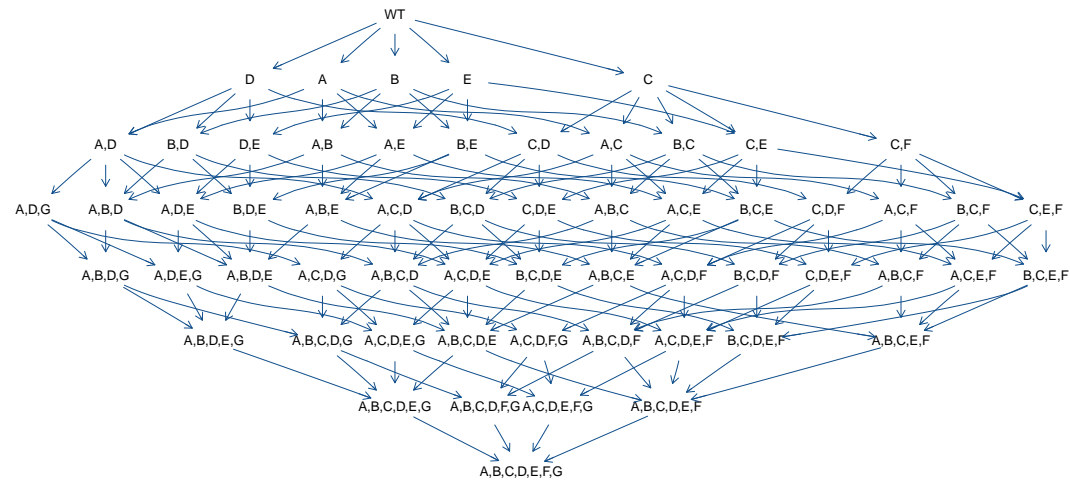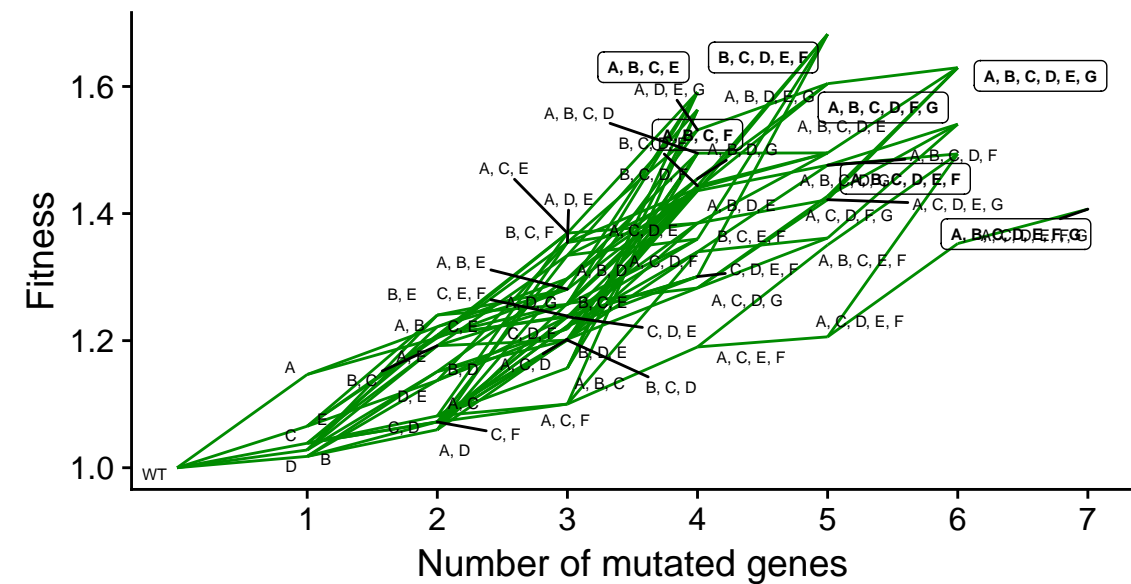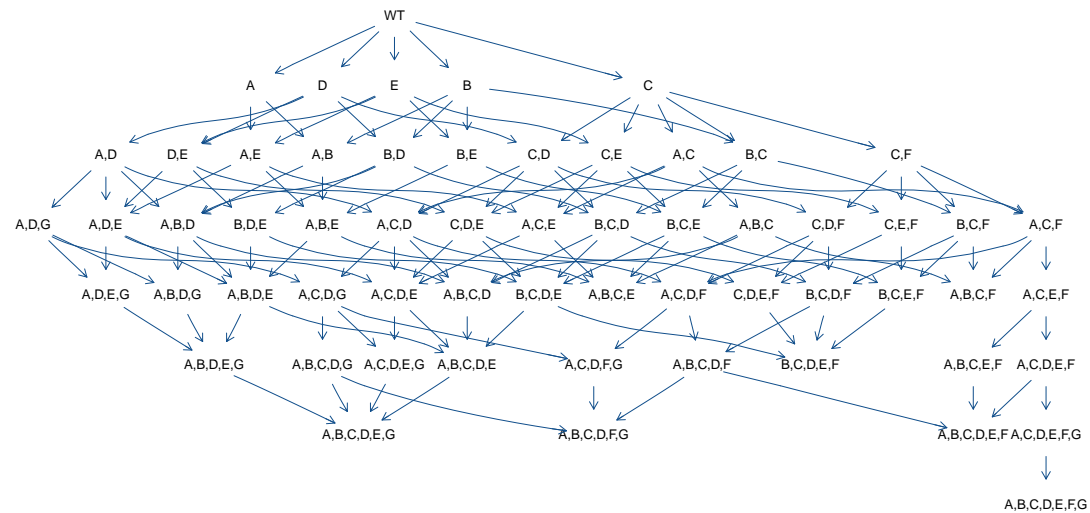

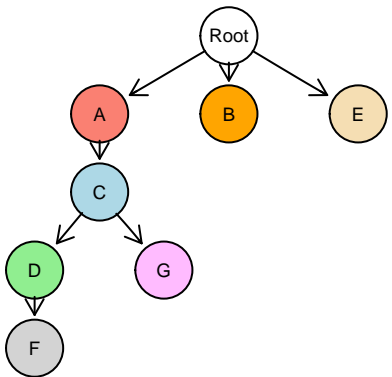

ID **XvPBLPU6GY62cXv3**  
 acc genotypes **32**  
 peaks no back **6**  
 removed edges **11**  
 prop rem edges **0.162**

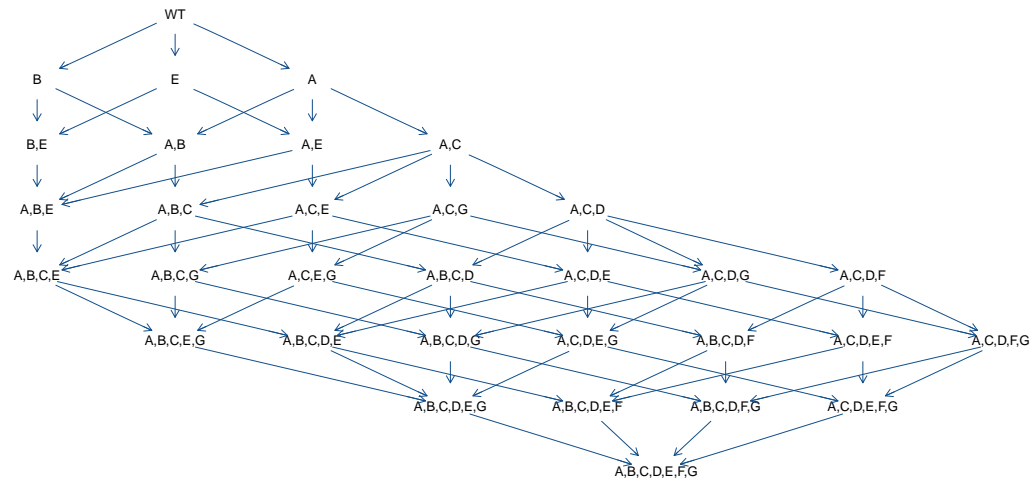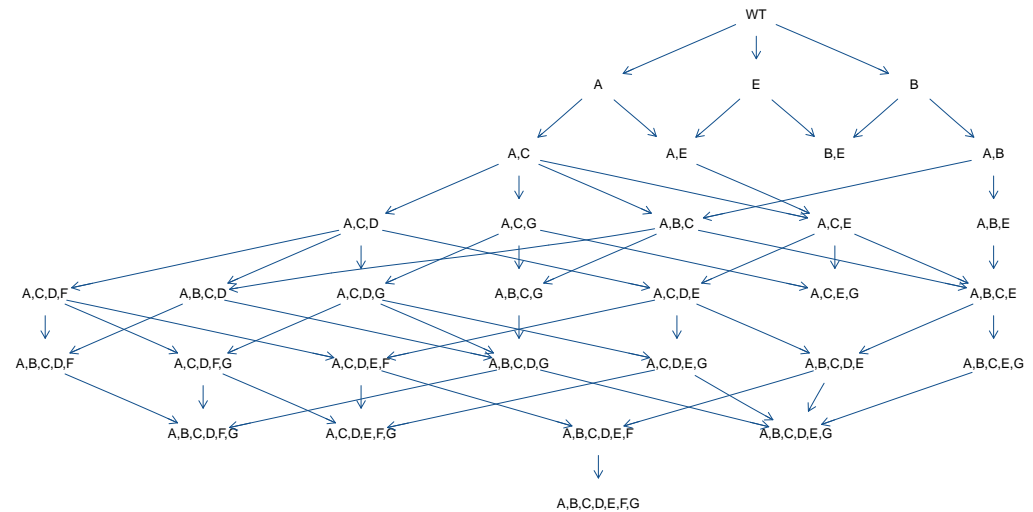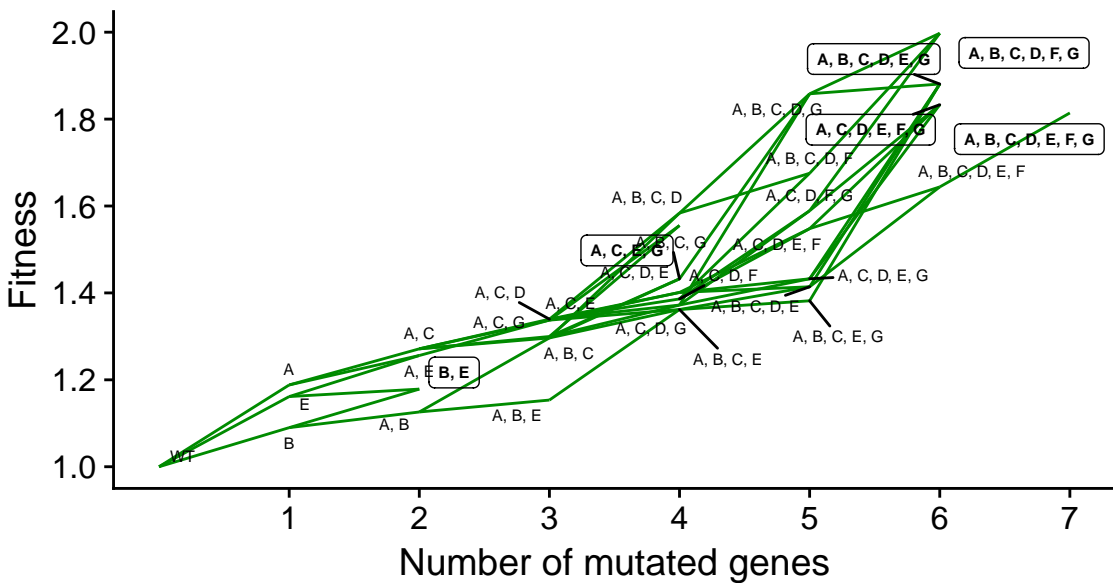

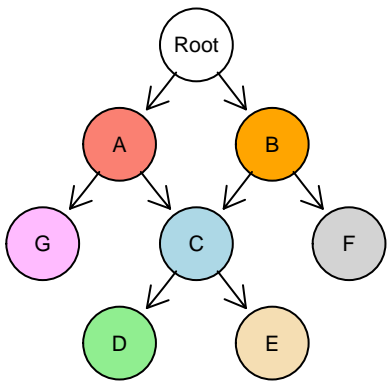

ID **yBXLyZECBuzOCwPP**  
 acc genotypes **25**  
 peaks no back **2**  
 removed edges **4**  
 prop rem edges **0.083**

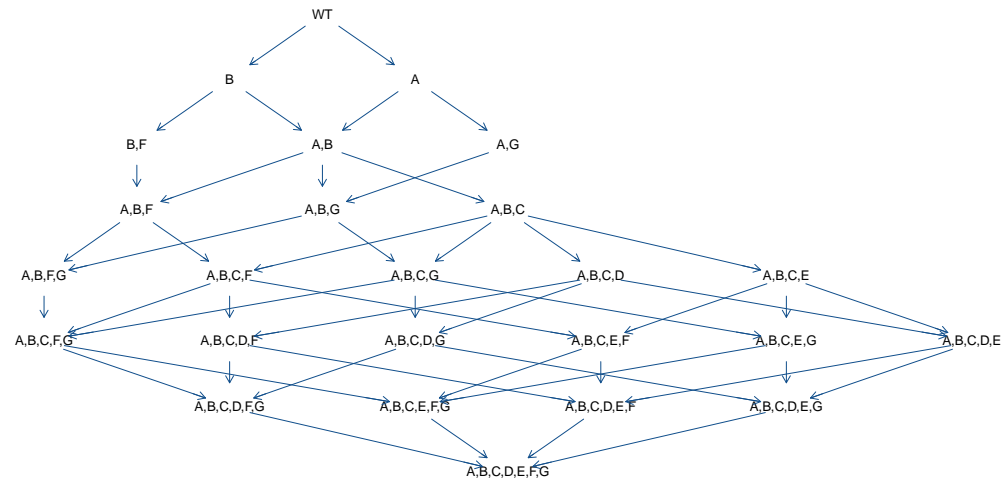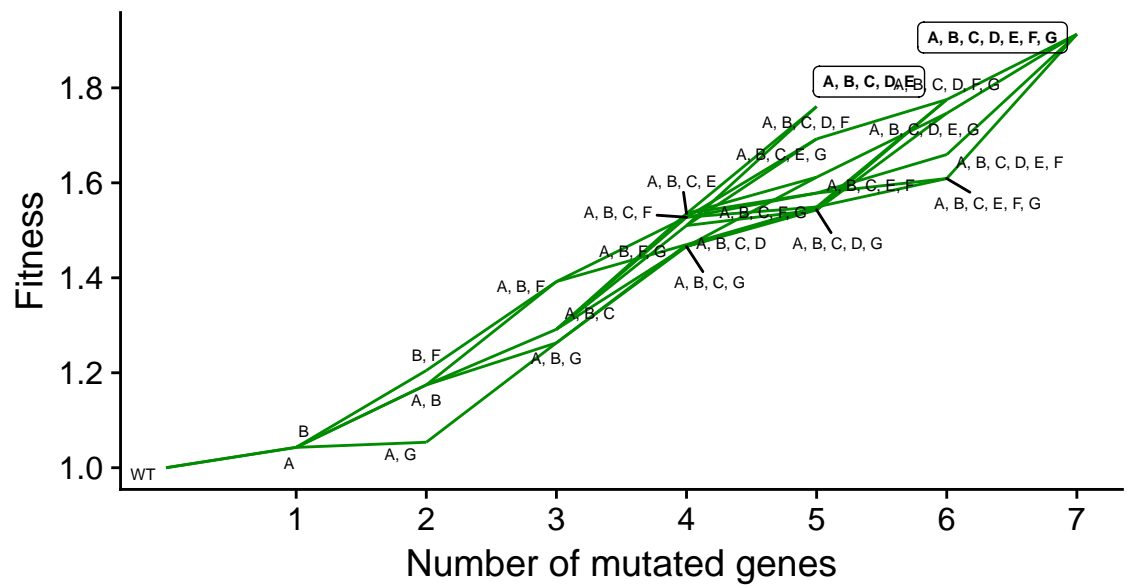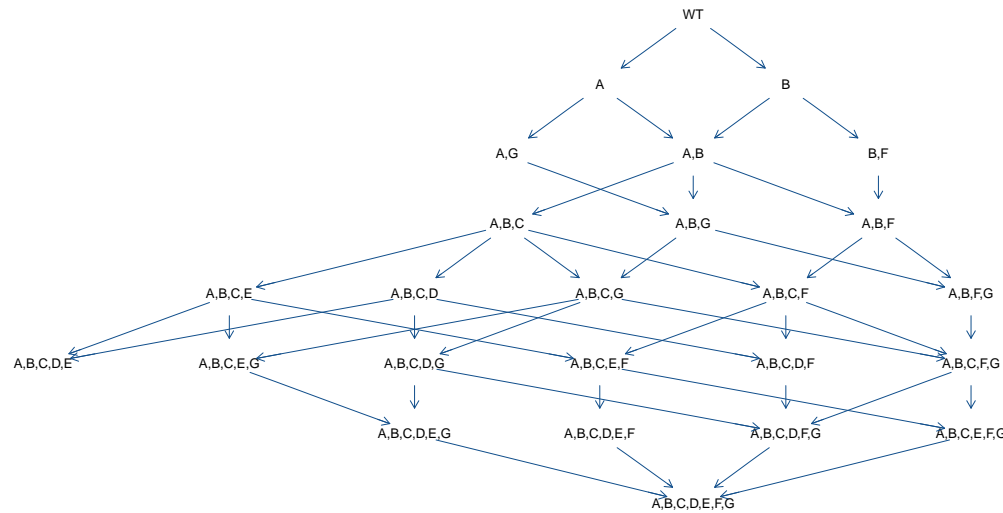

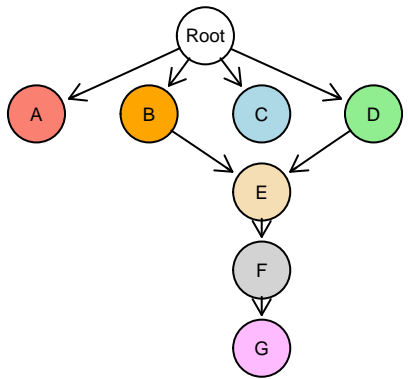

*ID* ycfMUx16qqaBjIW  
*acc genotypes* 28  
*peaks no back* 6  
*removed edges* 11  
*prop rem edges* 0.196

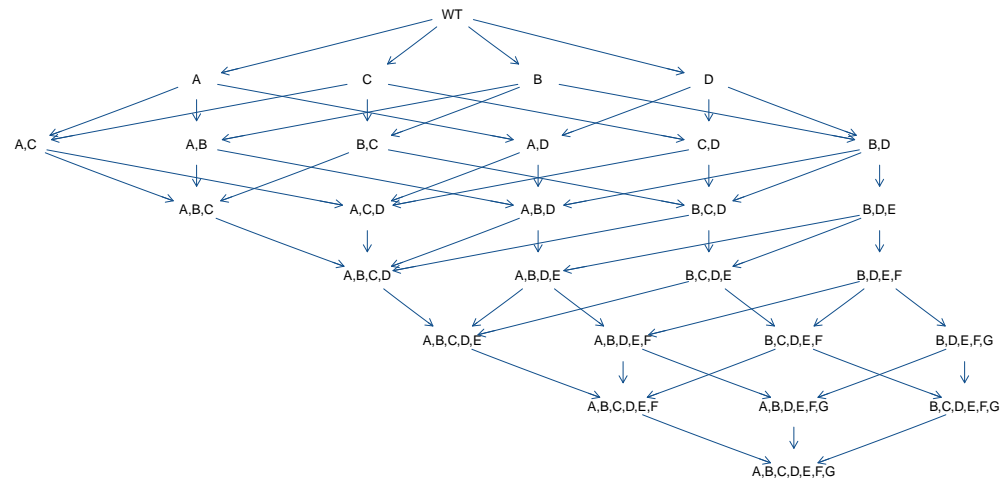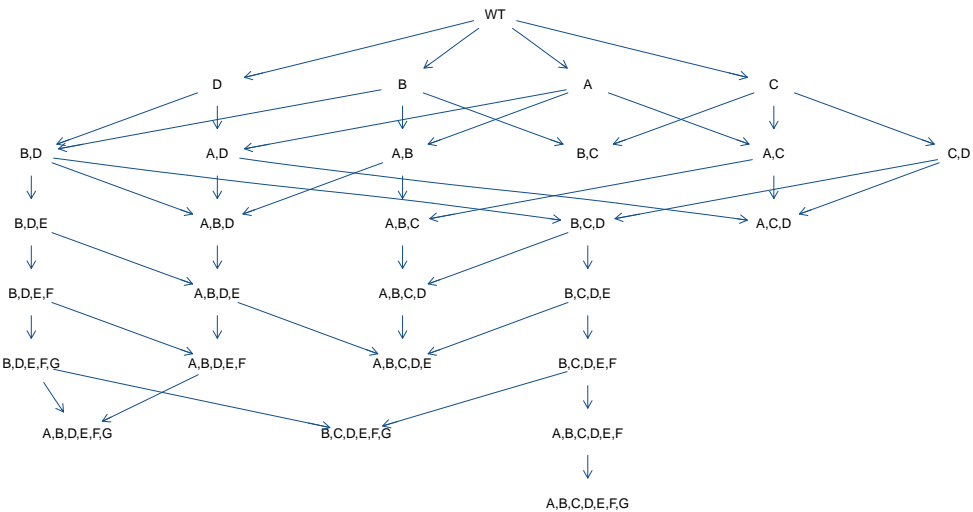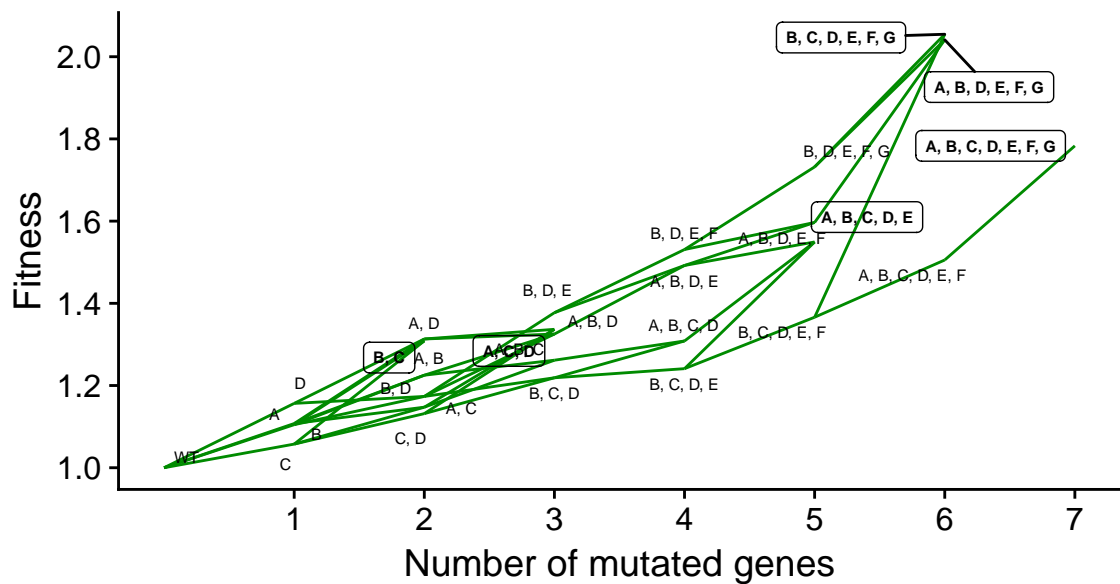

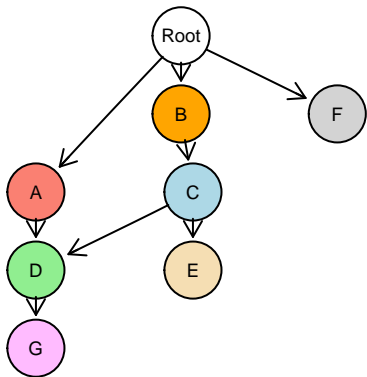

ID [yCxbC75Zji2W7wiD](#)  
 acc genotypes 24  
 peaks no back 7  
 removed edges 11  
 prop rem edges 0.25

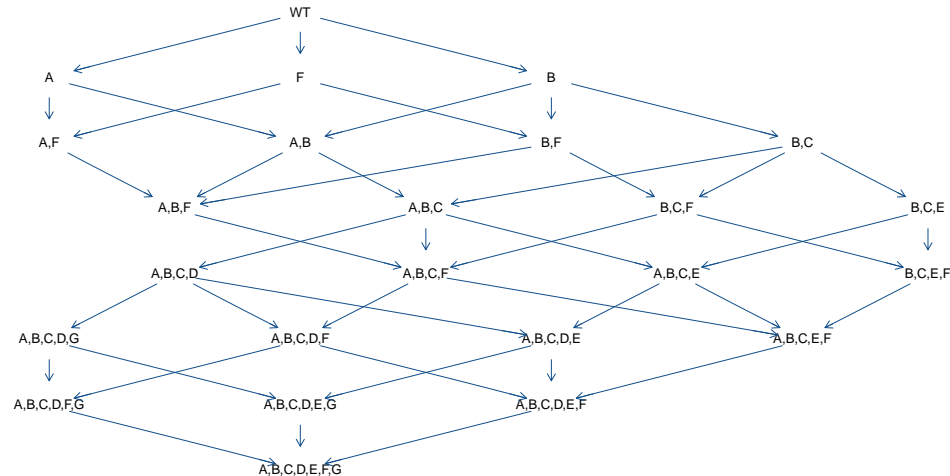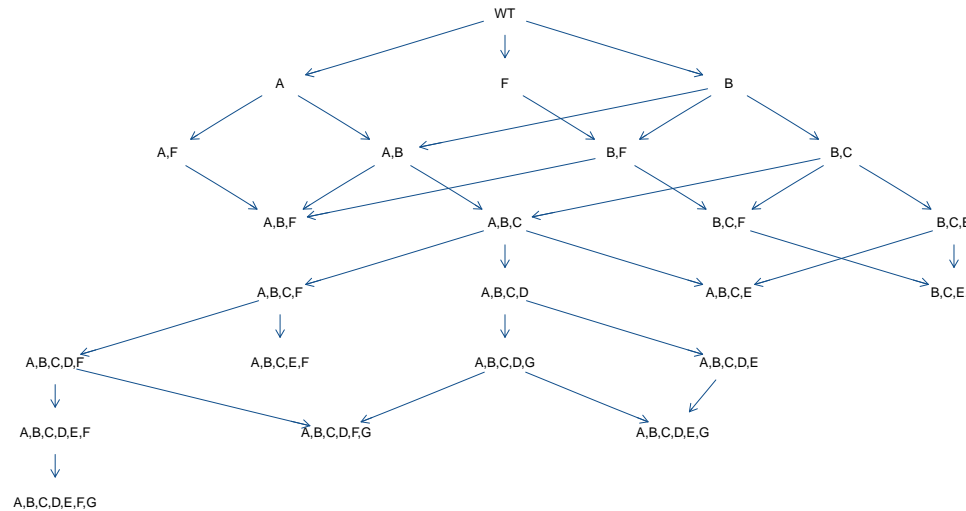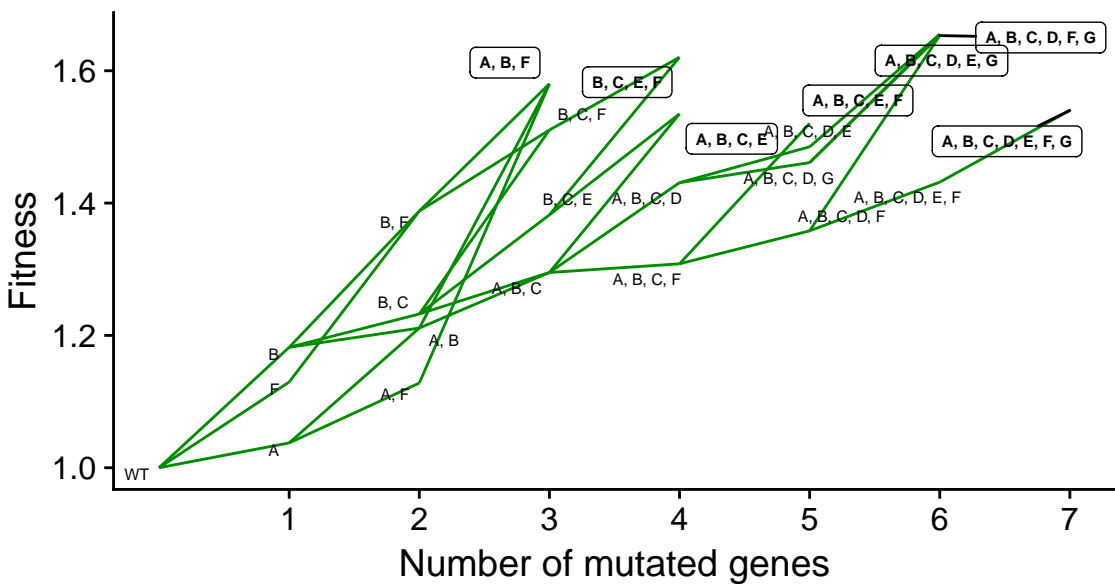

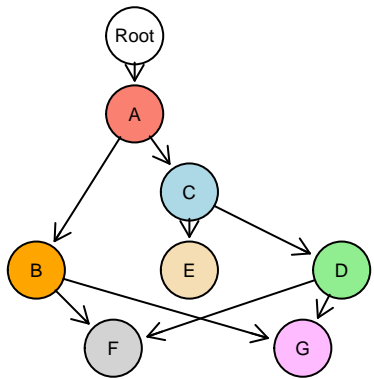

ID [yoDIXpd2iByH7zZf](#)  
*acc genotypes* 17  
*peaks no back* 5  
*removed edges* 6  
*prop rem edges* 0.222

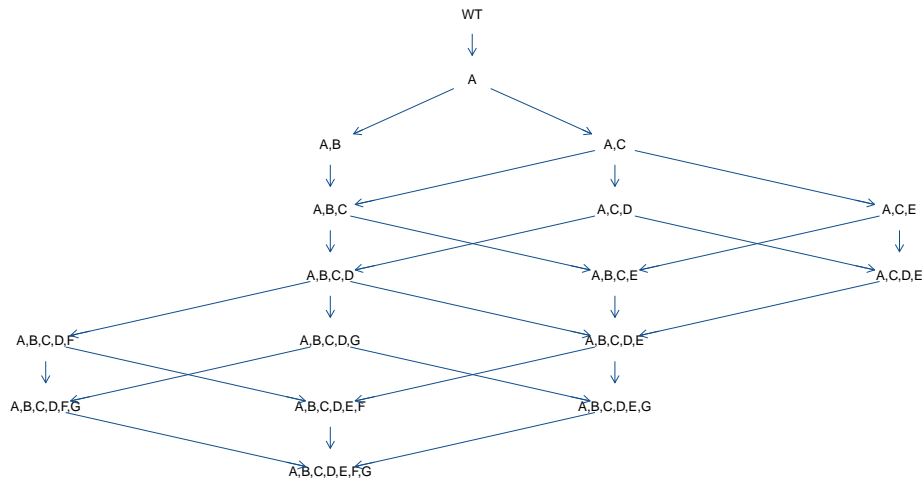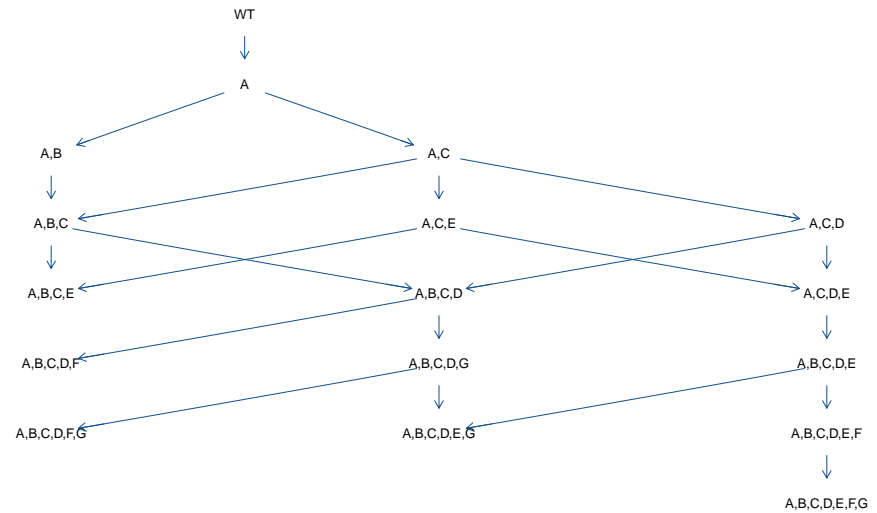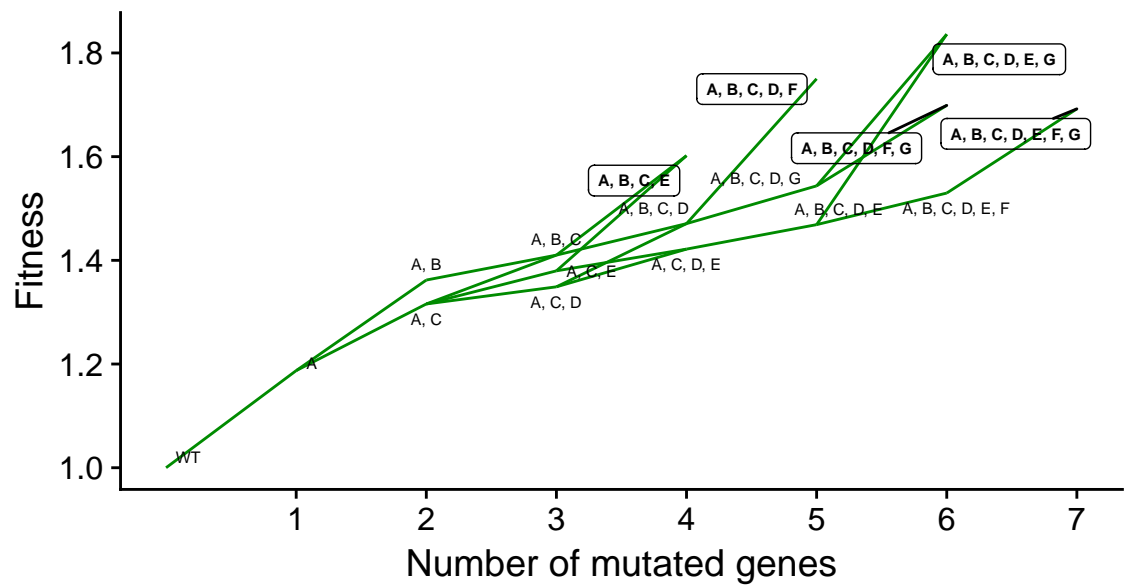

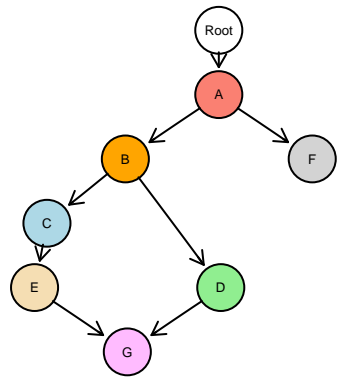

ID **YqJMzkvAccJ4gHYm**  
 acc genotypes **17**  
 peaks no back **3**  
 removed edges **3**  
 prop rem edges **0.111**

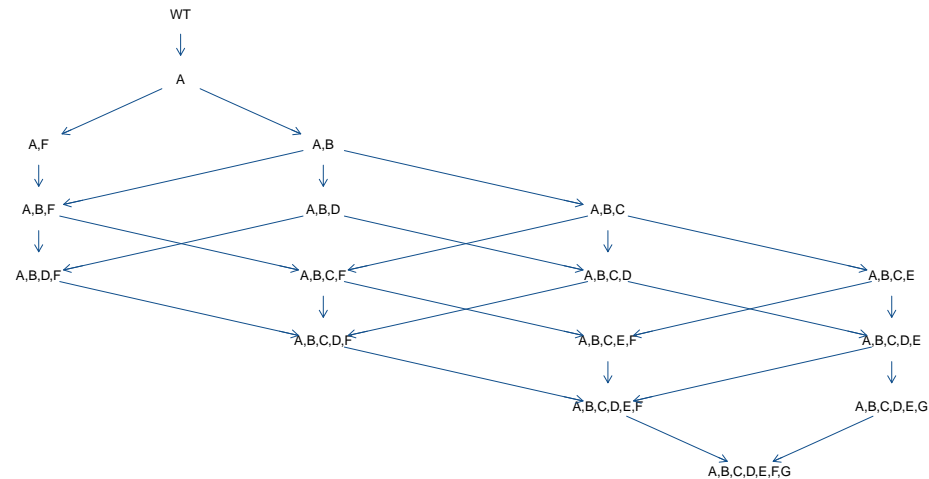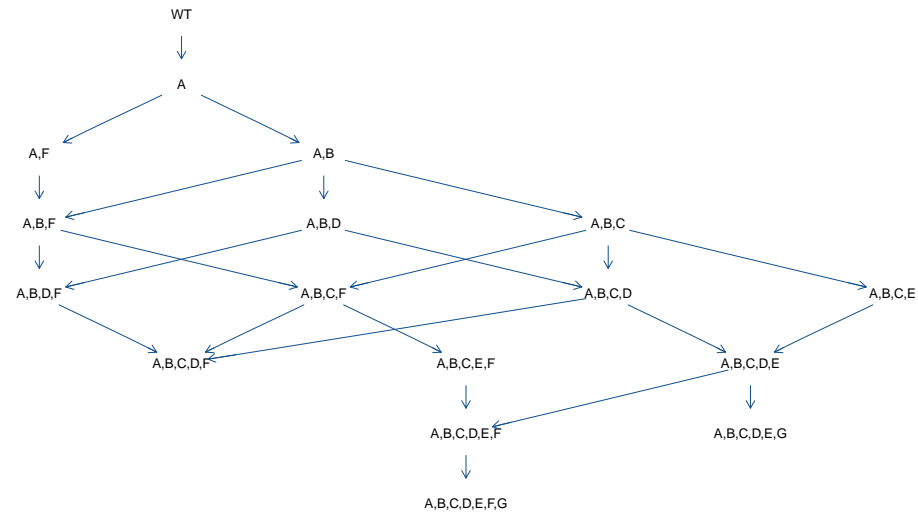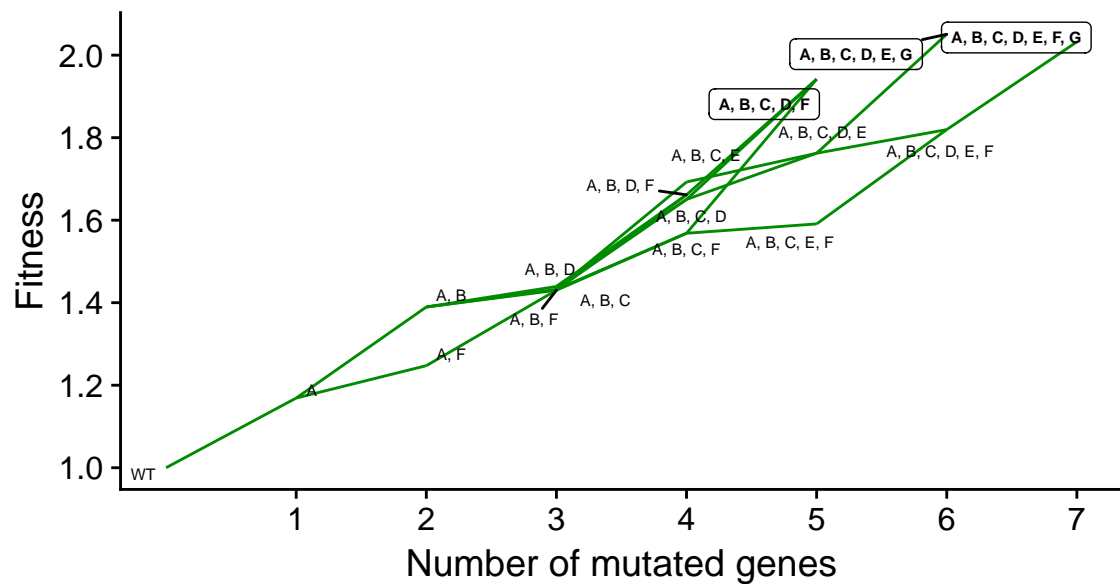

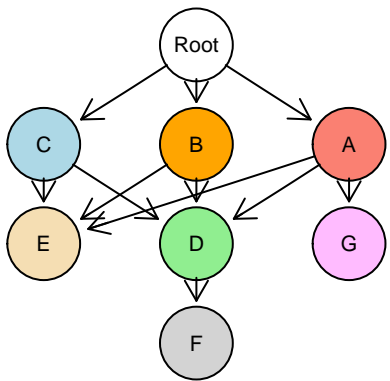

ID yX5bopH3PIXCr10r7  
 acc genotypes 22  
 peaks no back 4  
 removed edges 8  
 prop rem edges 0.205

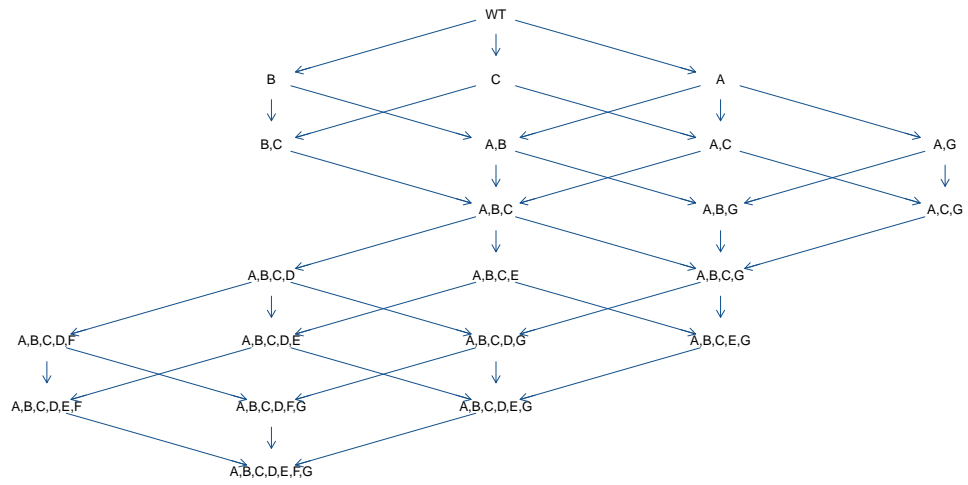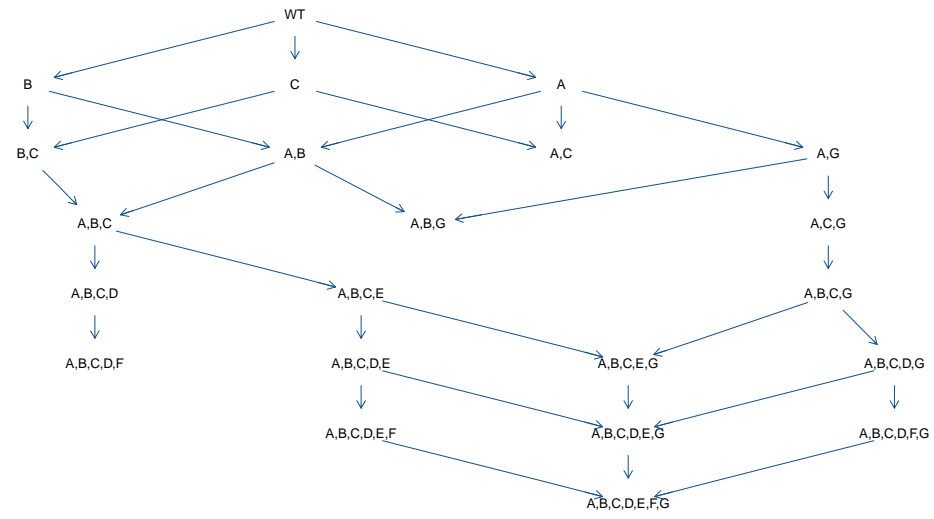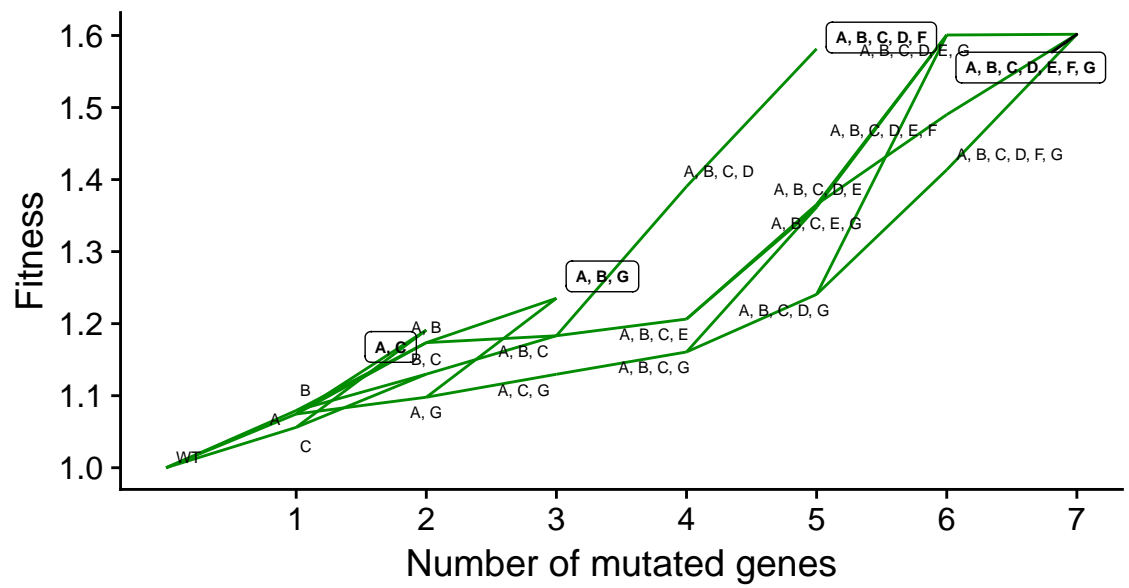



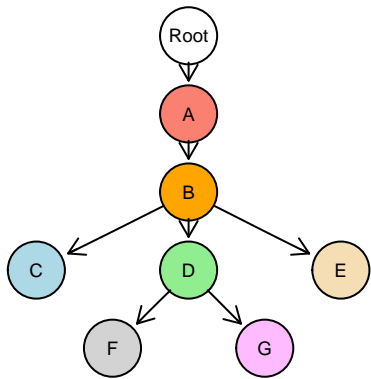

ID yy6dYwpU1ktFm49a  
 acc genotypes 22  
 peaks no back 6  
 removed edges 10  
 prop rem edges 0.238

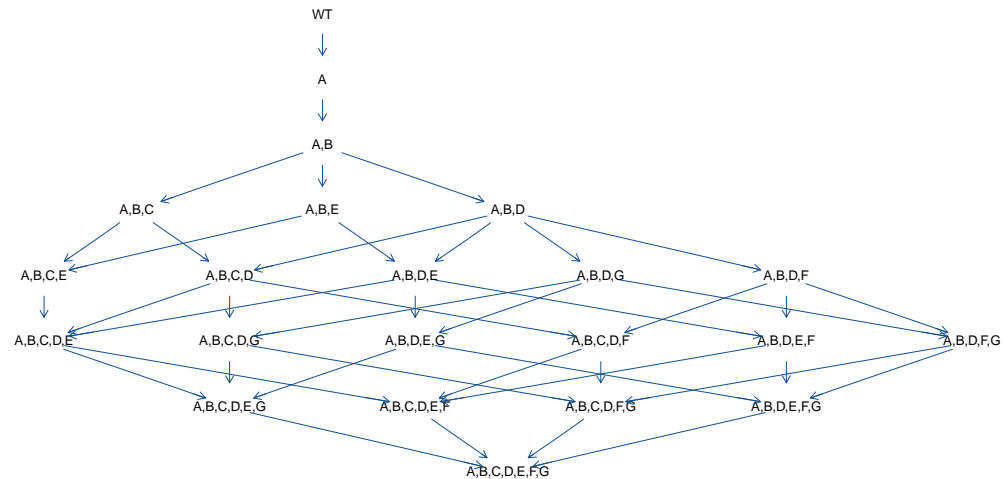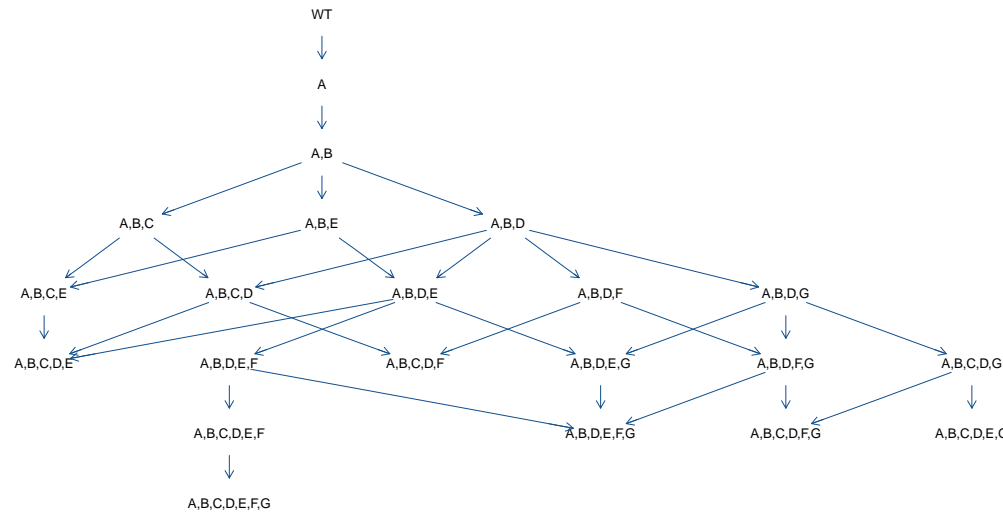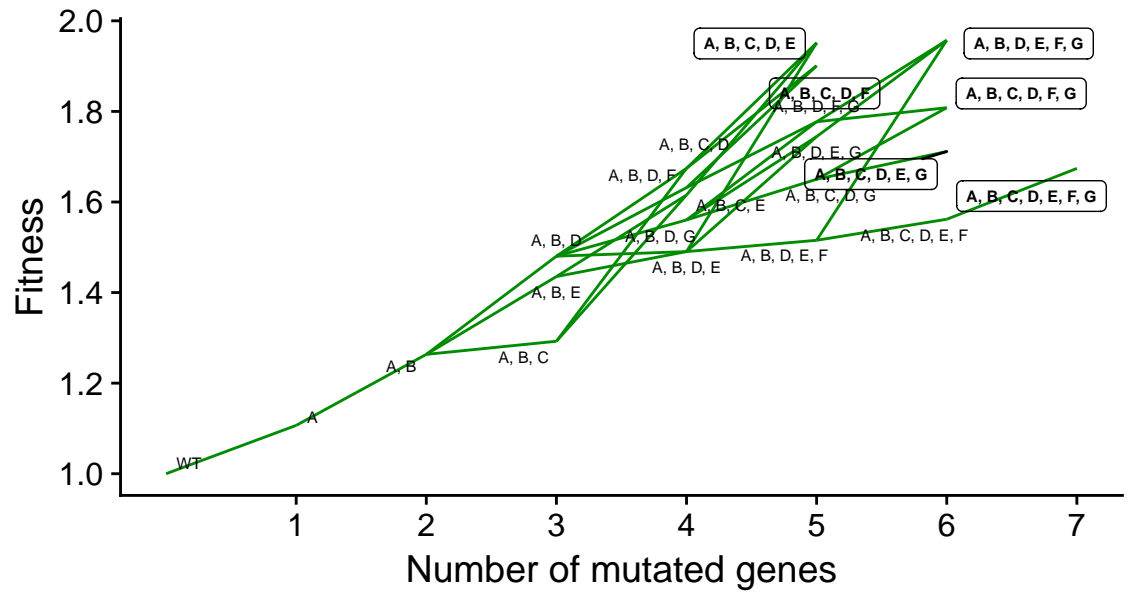

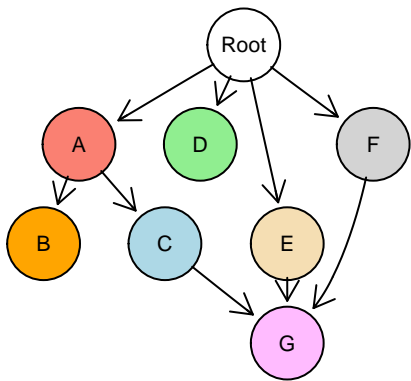

ID **zE6cfkQmrWiDYn5D**  
 acc genotypes **44**  
 peaks no back **5**  
 removed edges **18**  
 prop rem edges **0.167**

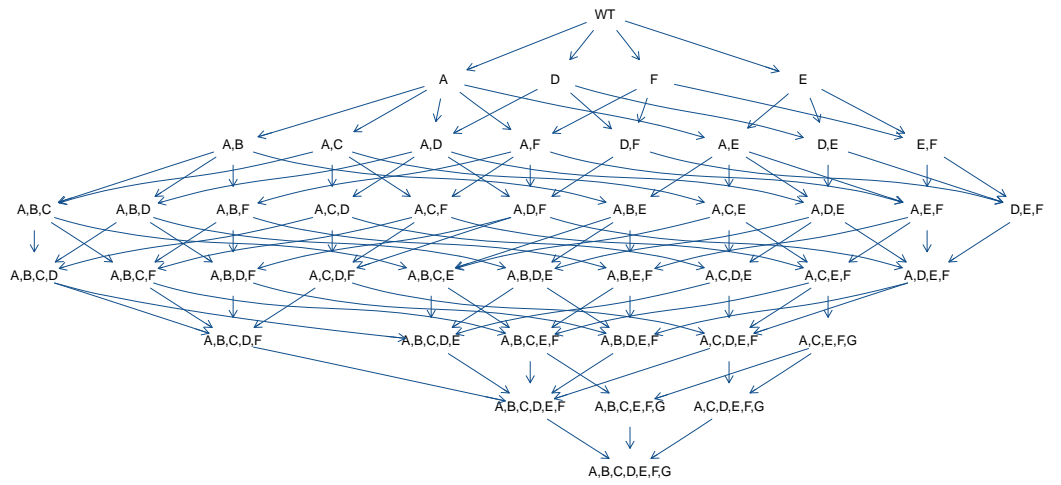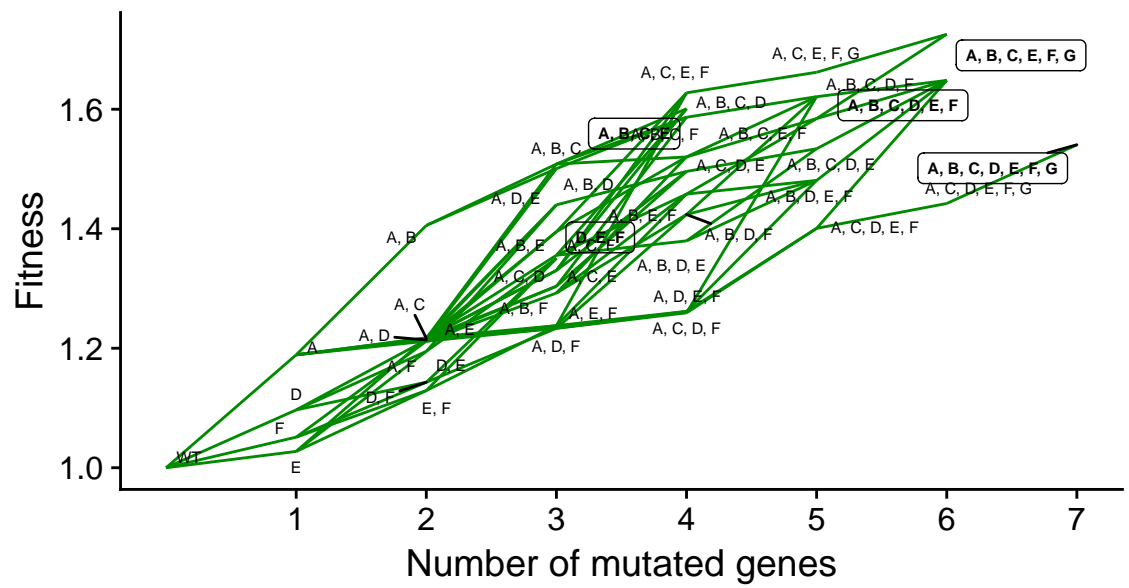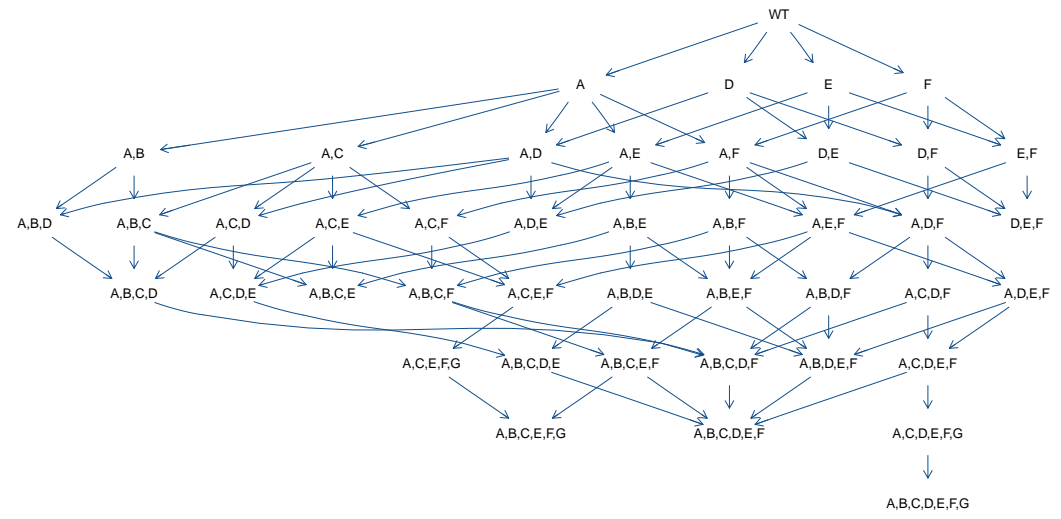

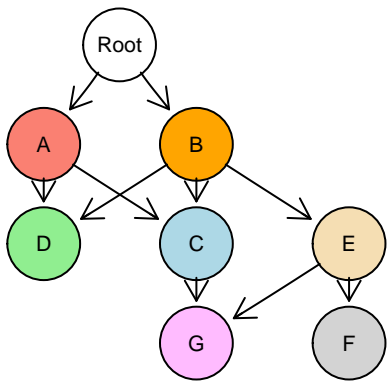

ID **zHGCza3O5qL97M76**  
 acc genotypes **21**  
 peaks no back **2**  
 removed edges **3**  
 prop rem edges **0.083**

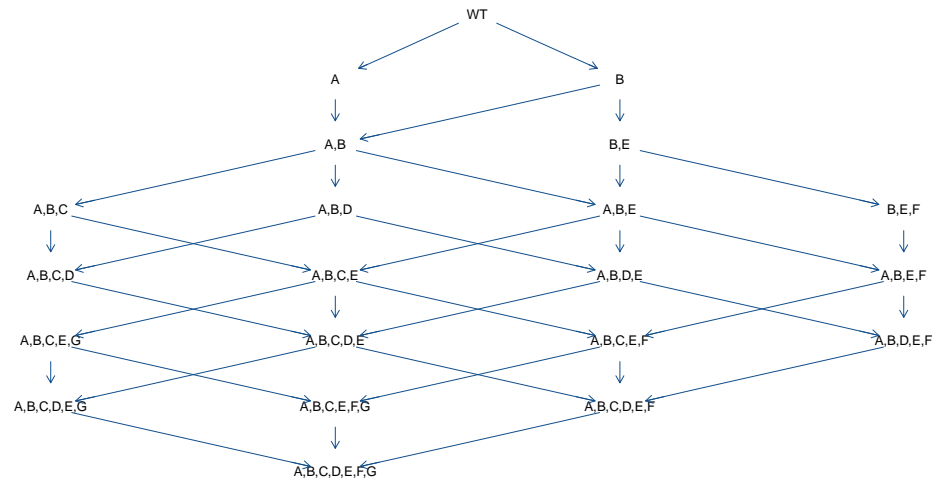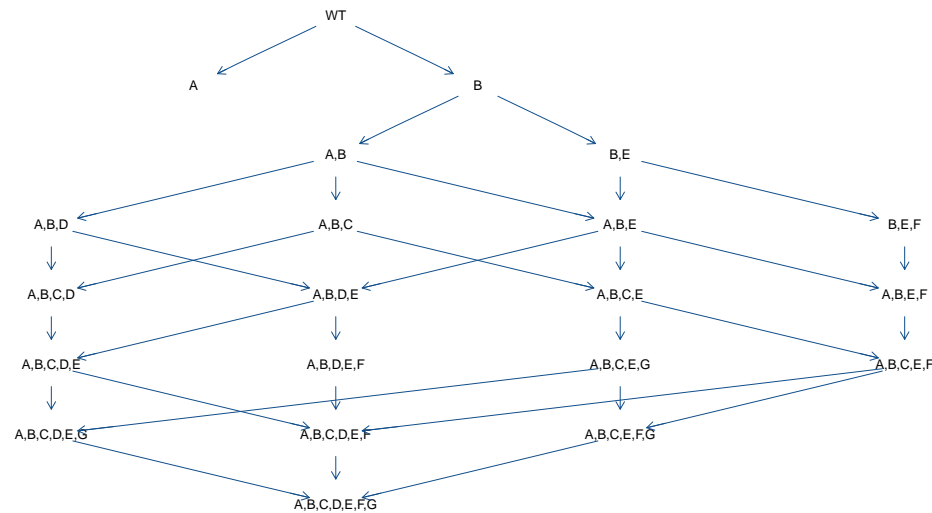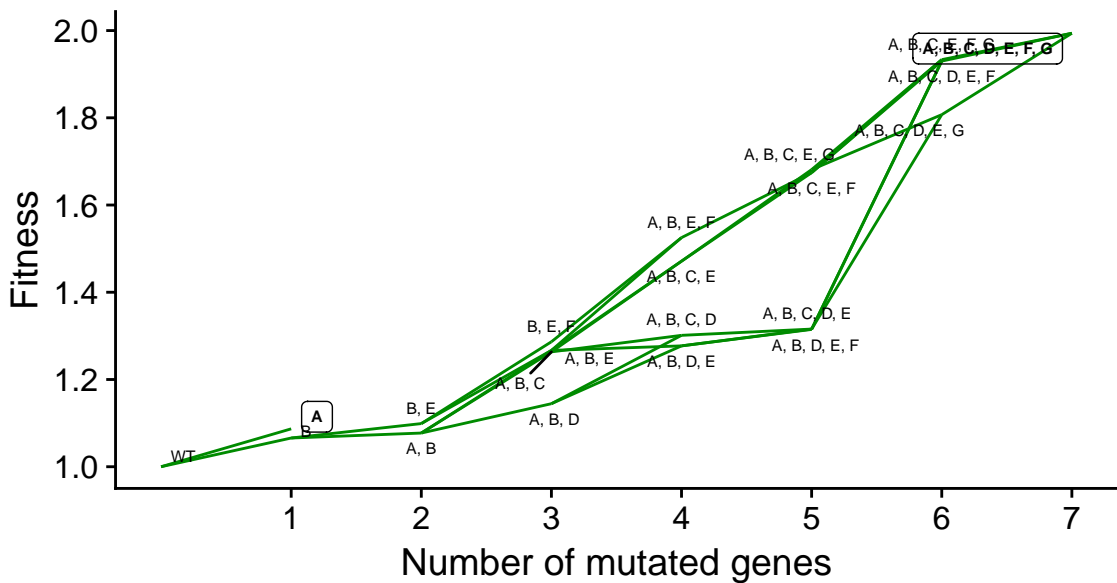

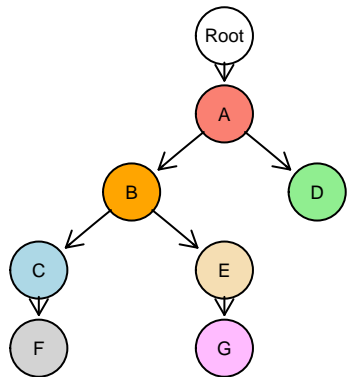

ID **ZkjYaBc10QMnrUp8W**  
 acc genotypes **21**  
 peaks no back **3**  
 removed edges **2**  
 prop rem edges **0.054**

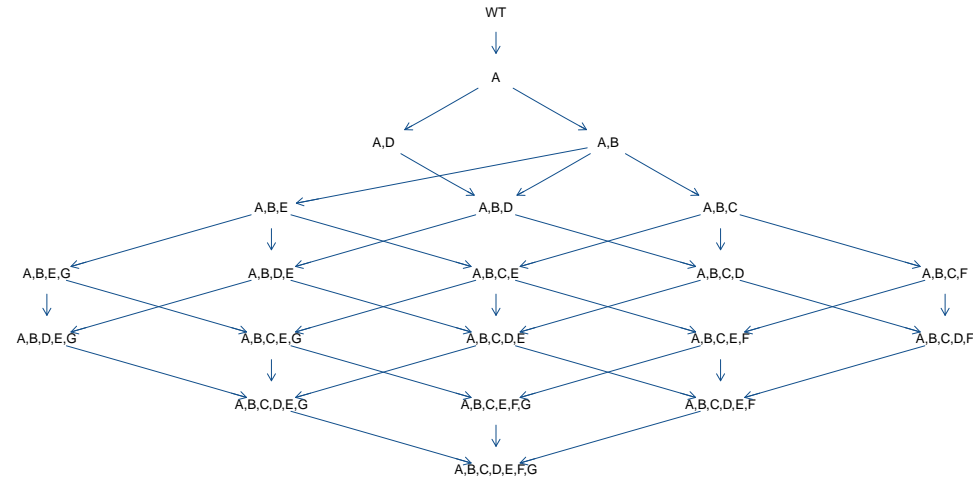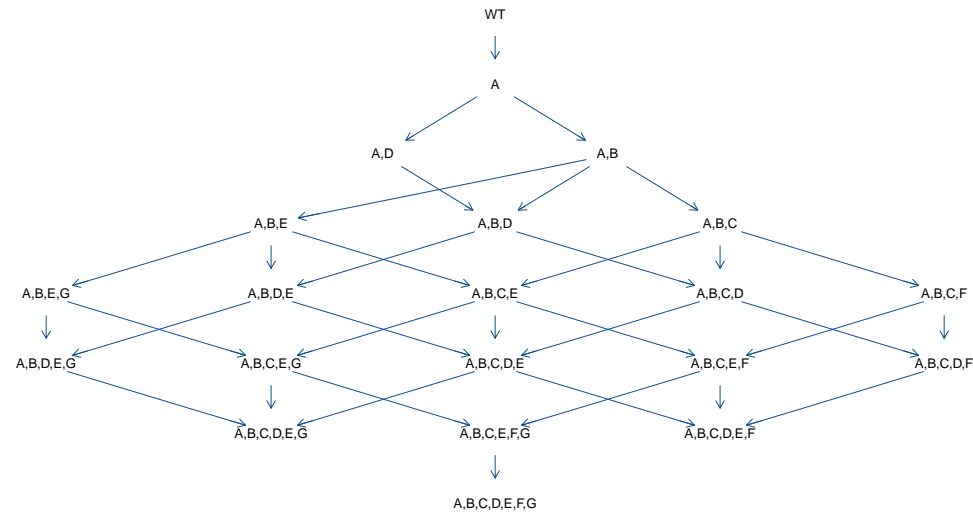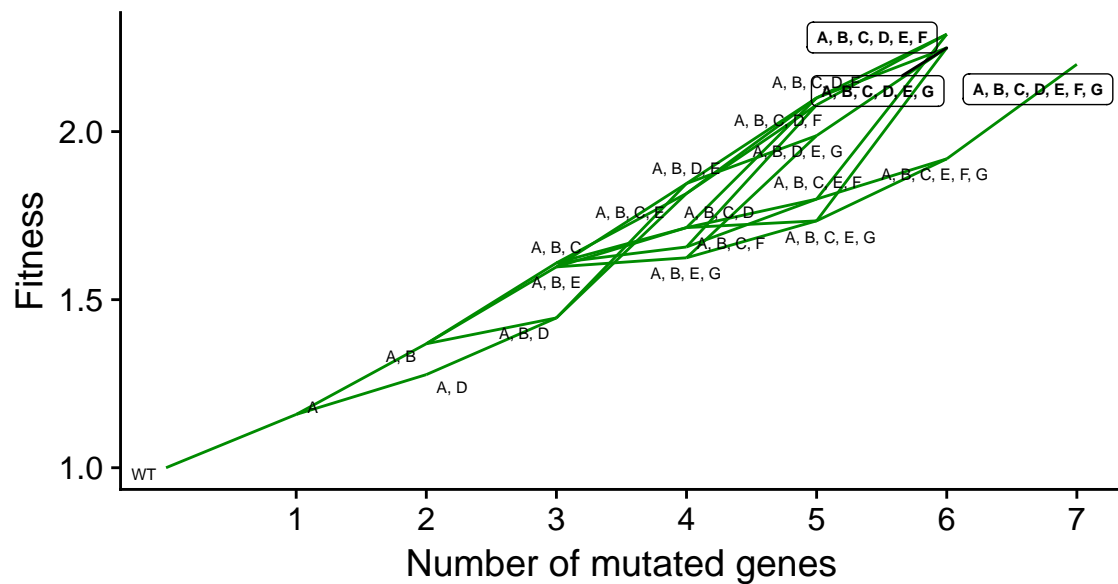

ID 10bxK1gc1IxCjpaJM  
 acc genotypes 24  
 peaks no back 9  
 removed edges NA  
 prop rem edges NA

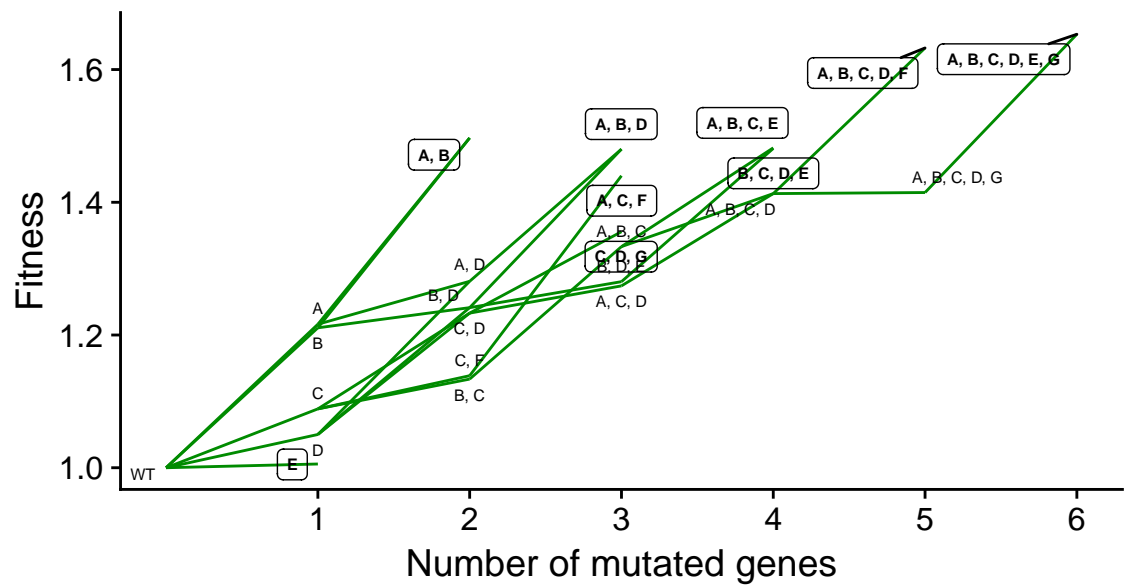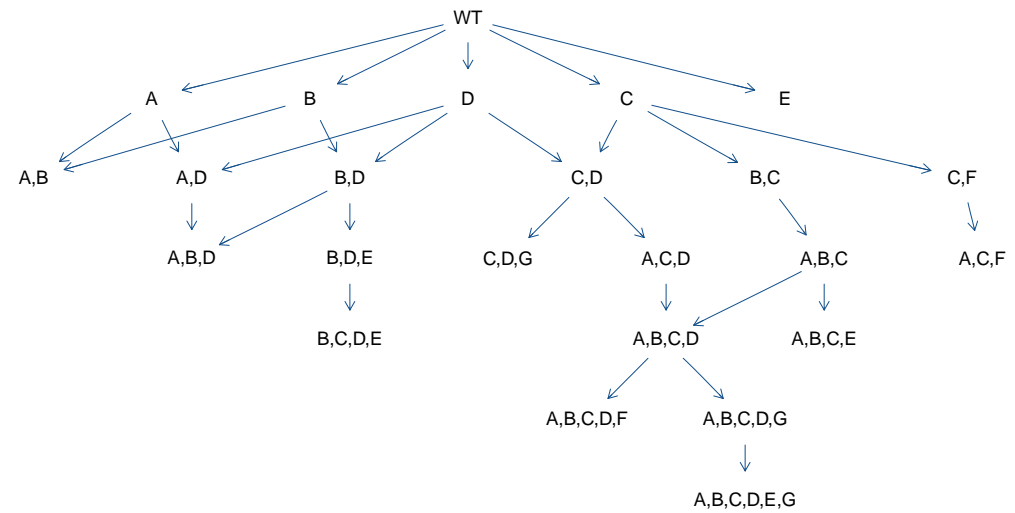

ID 10fs6bc54hwzLal8K  
 acc genotypes 99  
 peaks no back 14  
 removed edges NA  
 prop rem edges NA

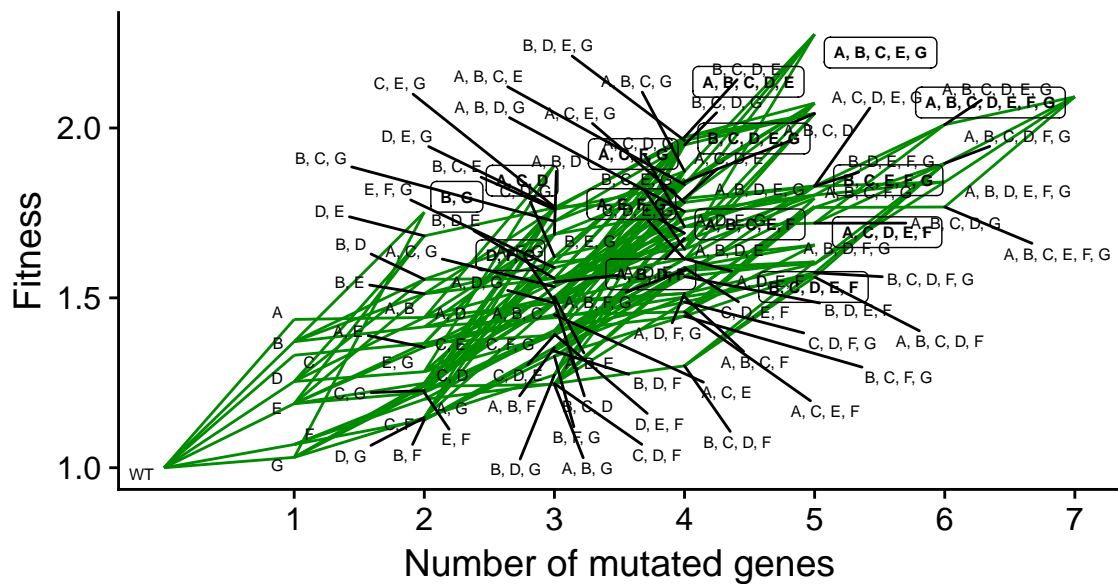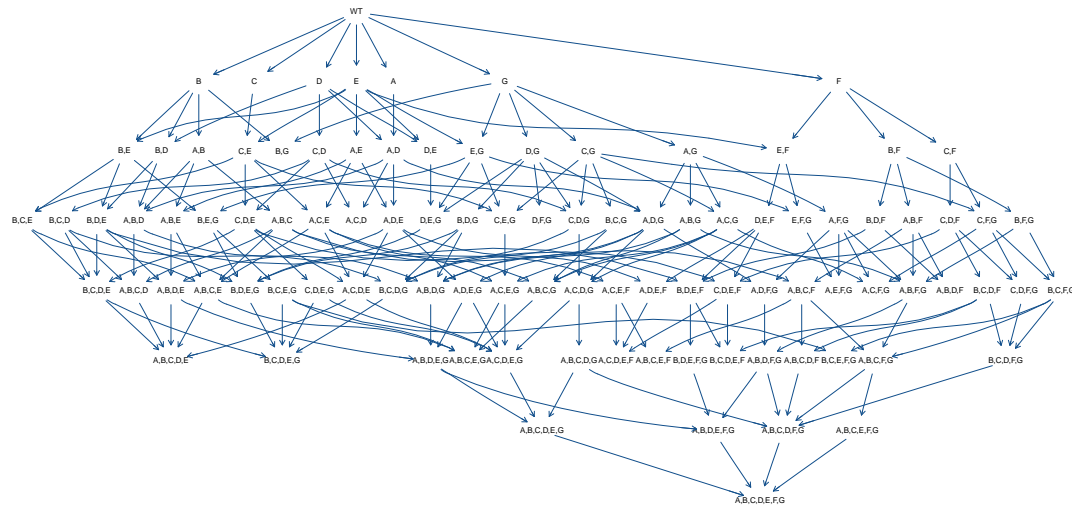



ID 10rLLqPV6rJMo5c6l  
 acc genotypes 28  
 peaks no back 9  
 removed edges NA  
 prop rem edges NA

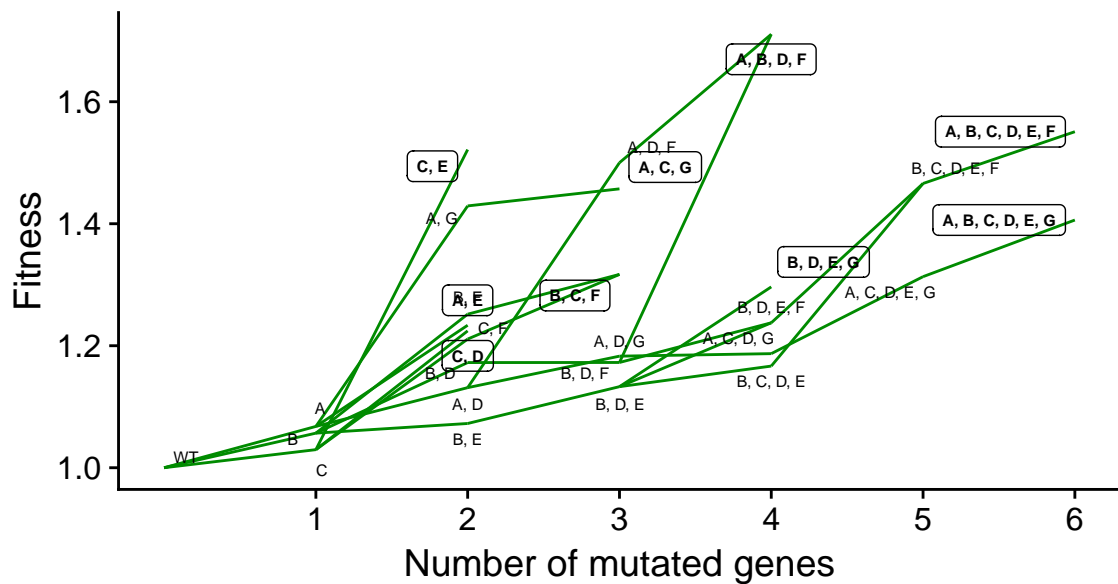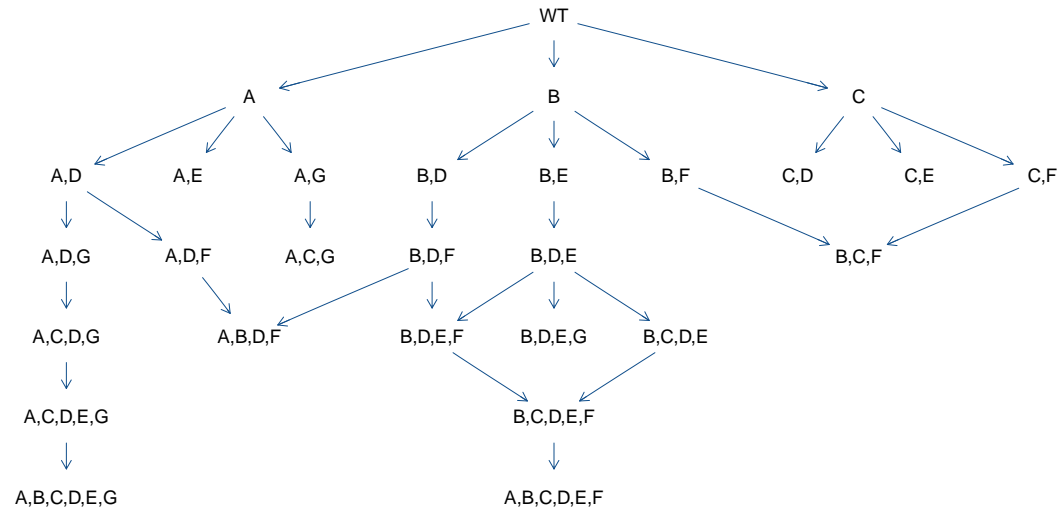





ID 16H2tTfJLrFoSFFU  
 acc genotypes 23  
 peaks no back 7  
 removed edges NA  
 prop rem edges NA

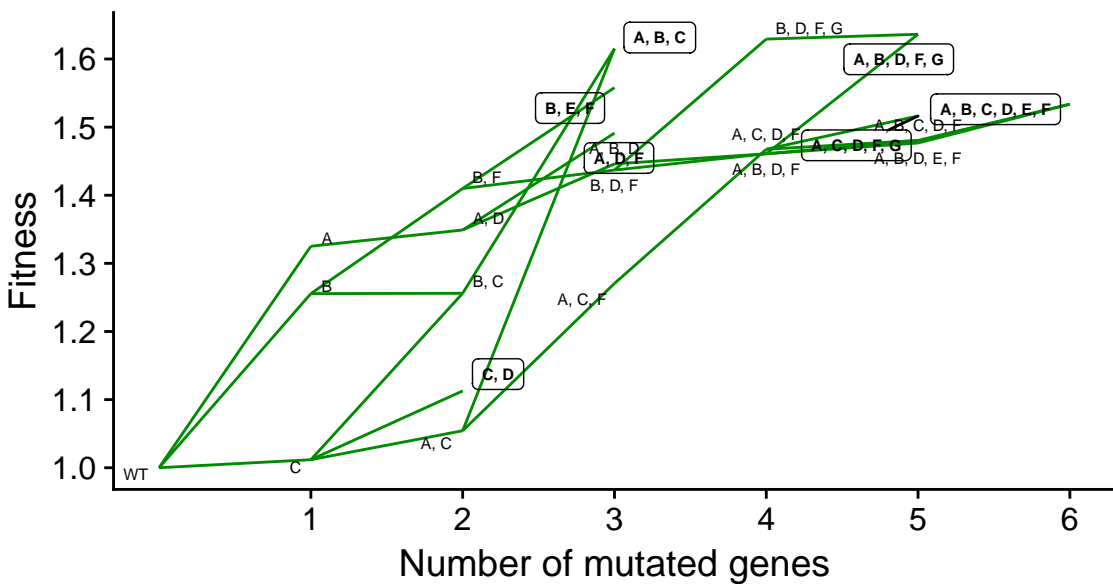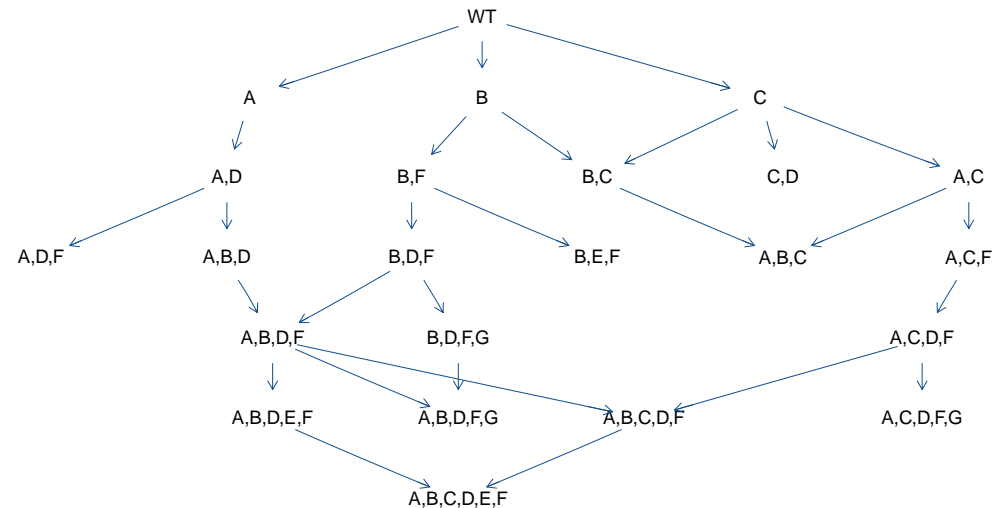

ID 18VIJttljPc2A62  
 acc genotypes 24  
 peaks no back 10  
 removed edges NA  
 prop rem edges NA

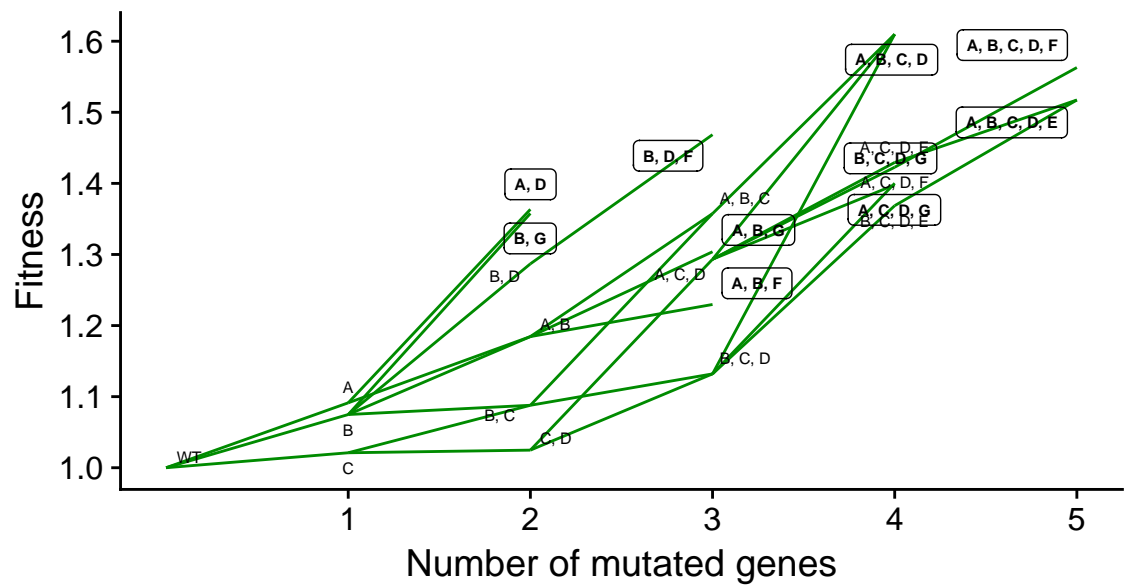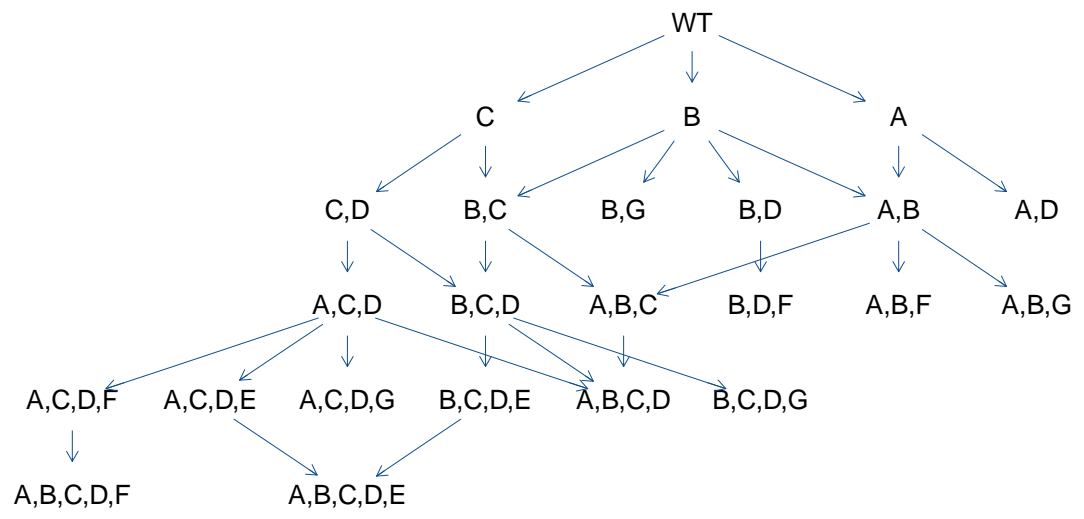

ID 1yIOxuiyzdWquD2u  
 acc genotypes 27  
 peaks no back 12  
 removed edges NA  
 prop rem edges NA

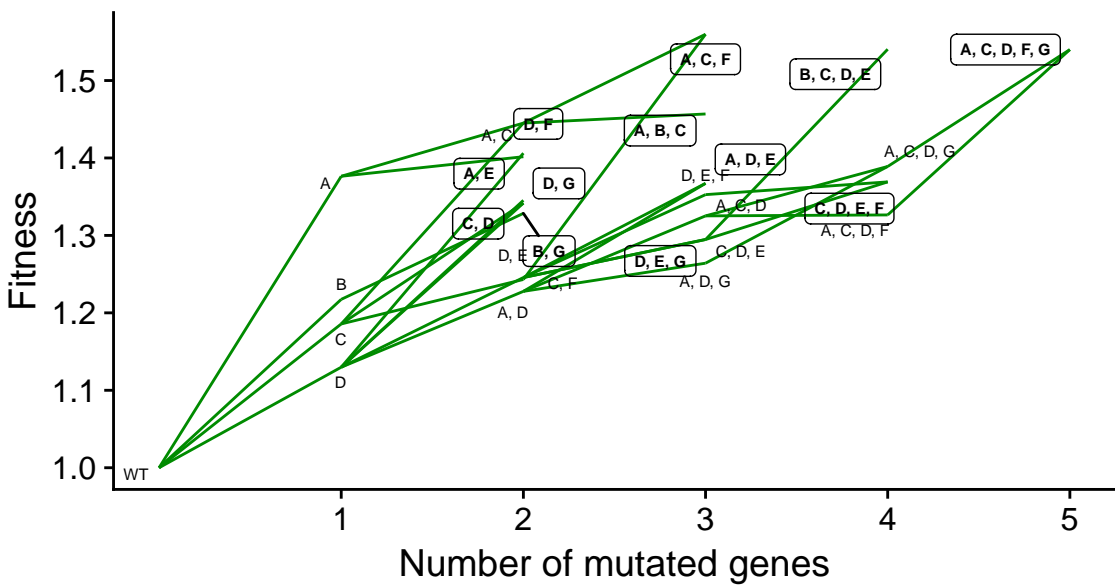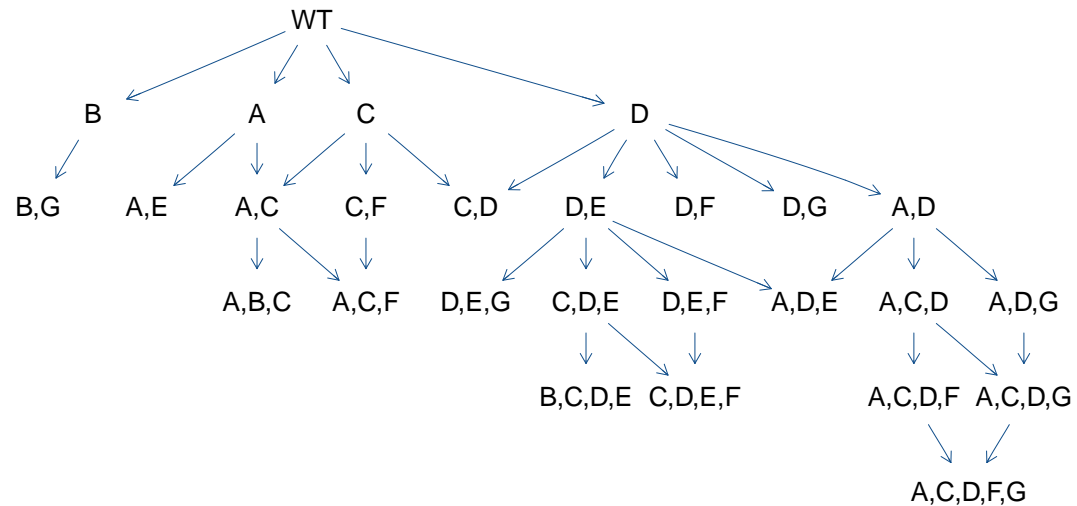

ID 28U7vxmKq8g5SSwV  
 acc genotypes 26  
 peaks no back 11  
 removed edges NA  
 prop rem edges NA

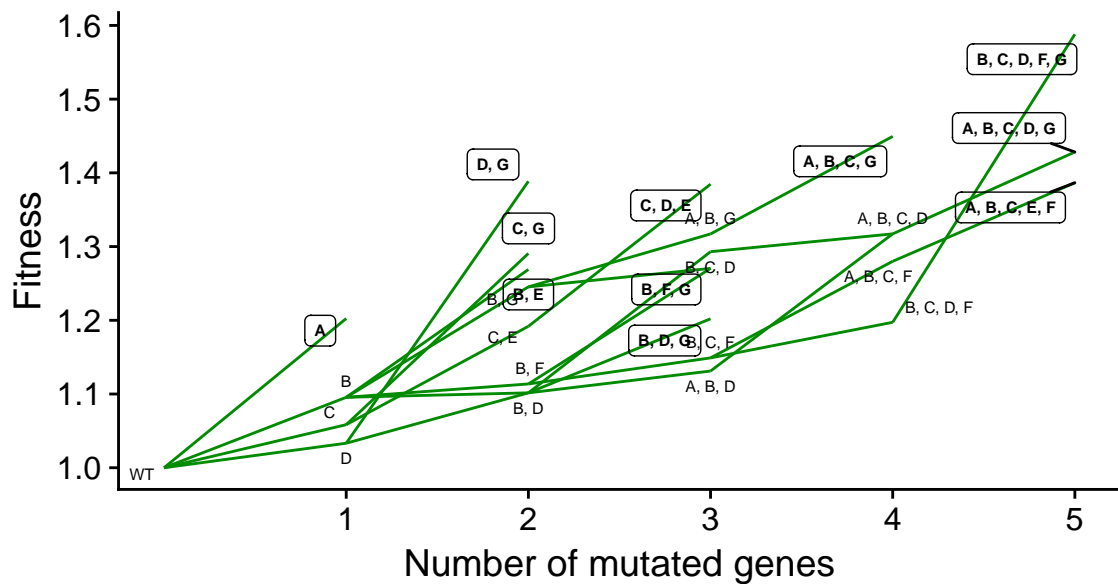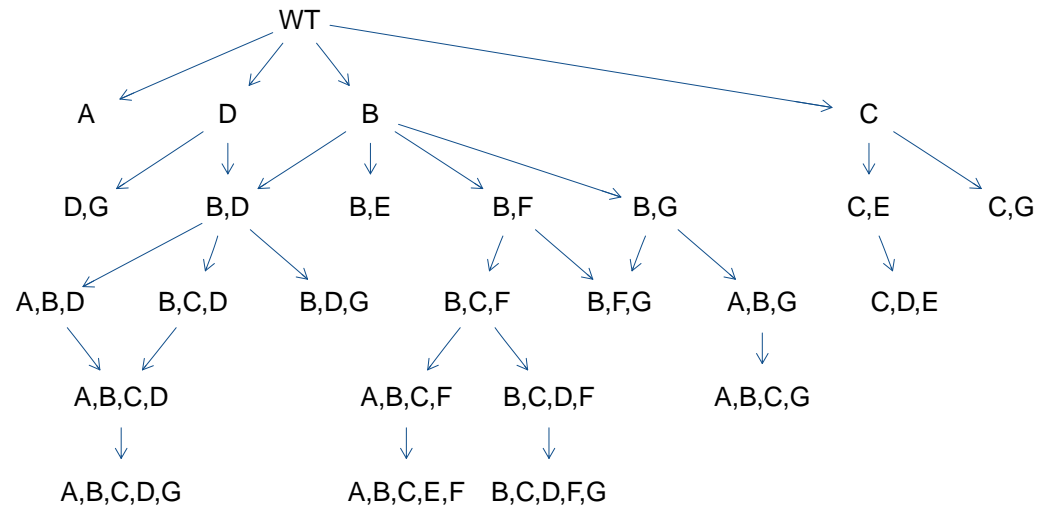

ID 2PO6NSrcnBJAxivm  
 acc genotypes 12  
 peaks no back 5  
 removed edges NA  
 prop rem edges NA

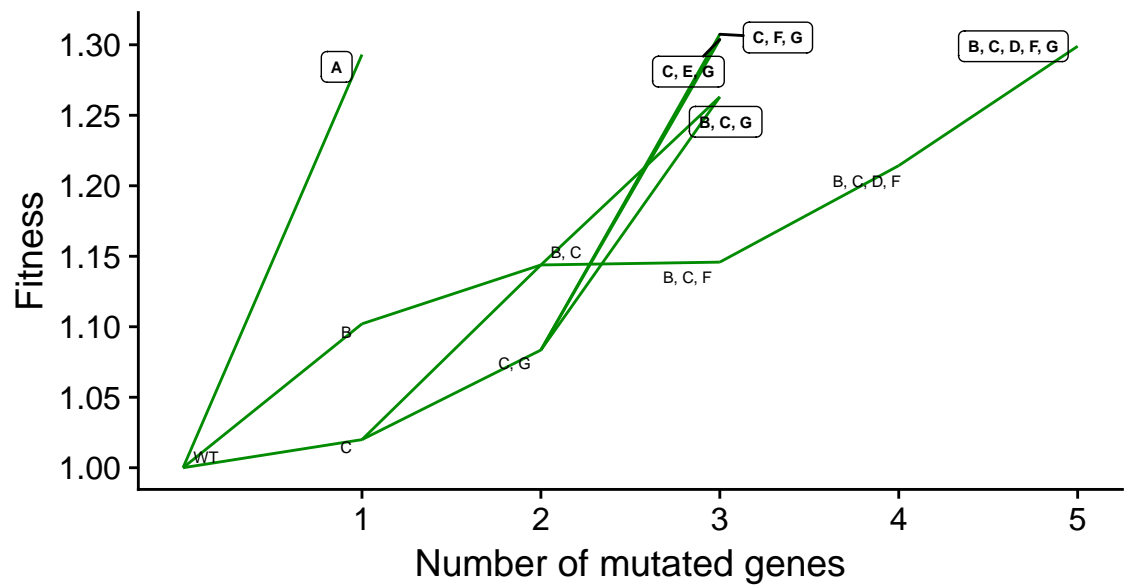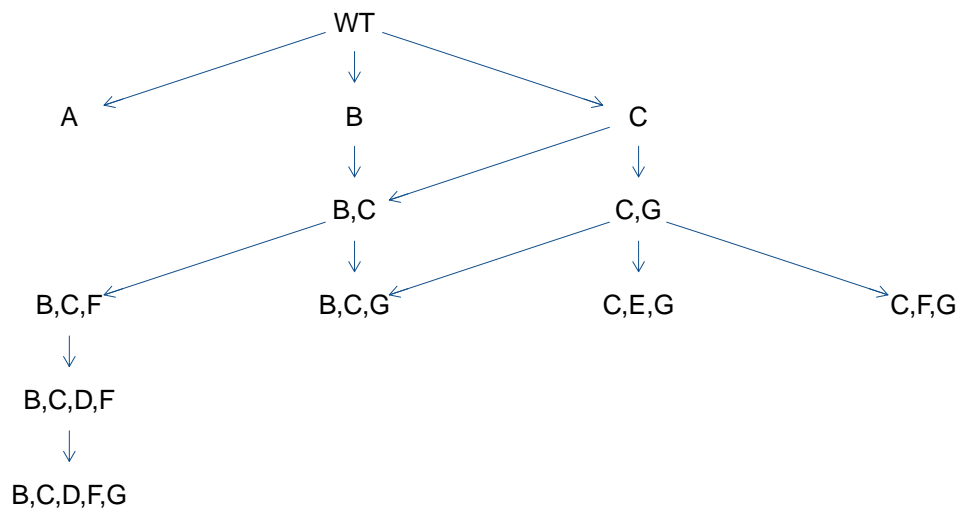

ID 344NmuCSF610Hlunl  
 acc genotypes 44  
 peaks no back 17  
 removed edges NA  
 prop rem edges NA

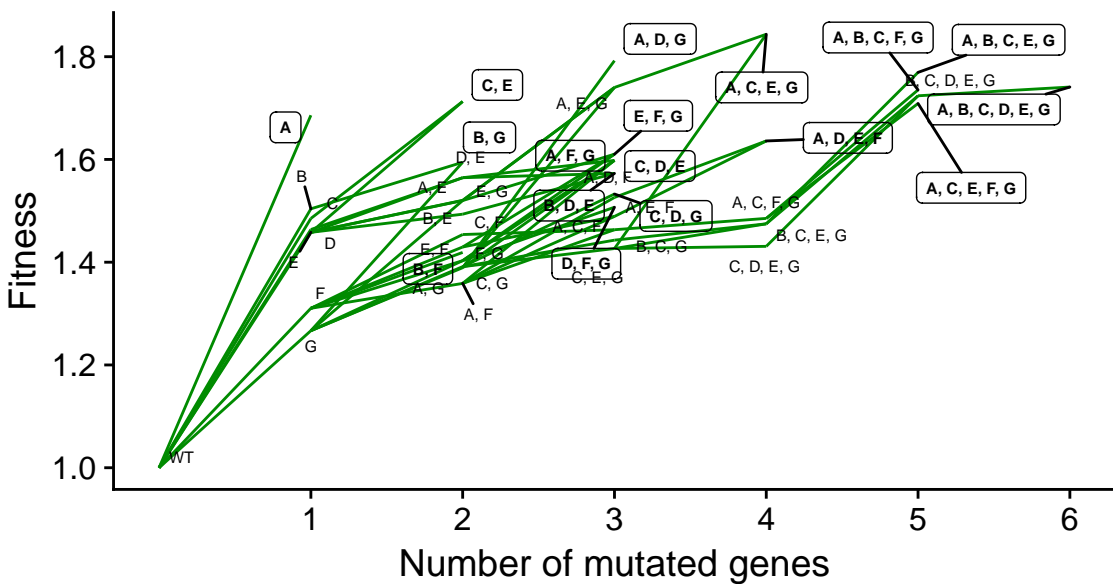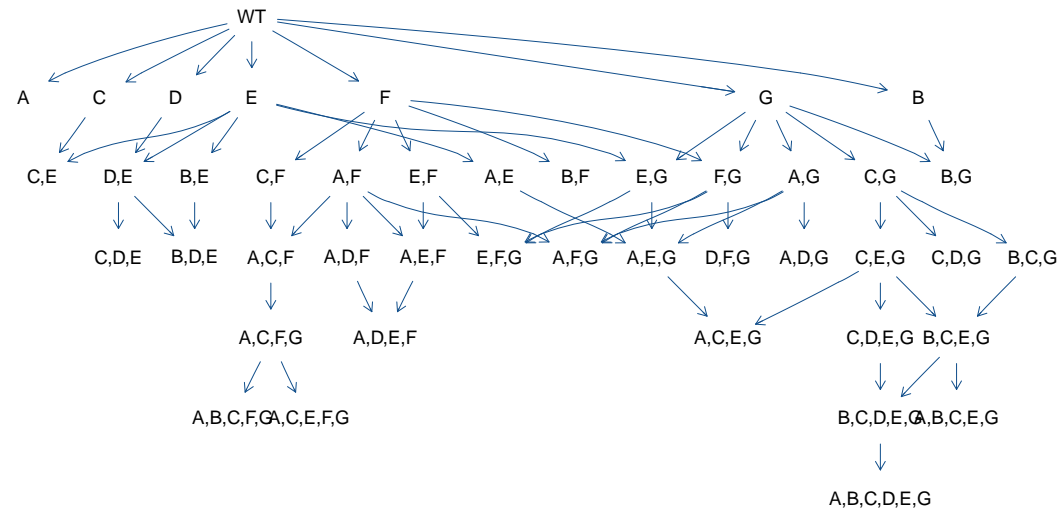

ID 3JtCUkHFLmBXzdb  
 acc genotypes 25  
 peaks no back 13  
 removed edges NA  
 prop rem edges NA

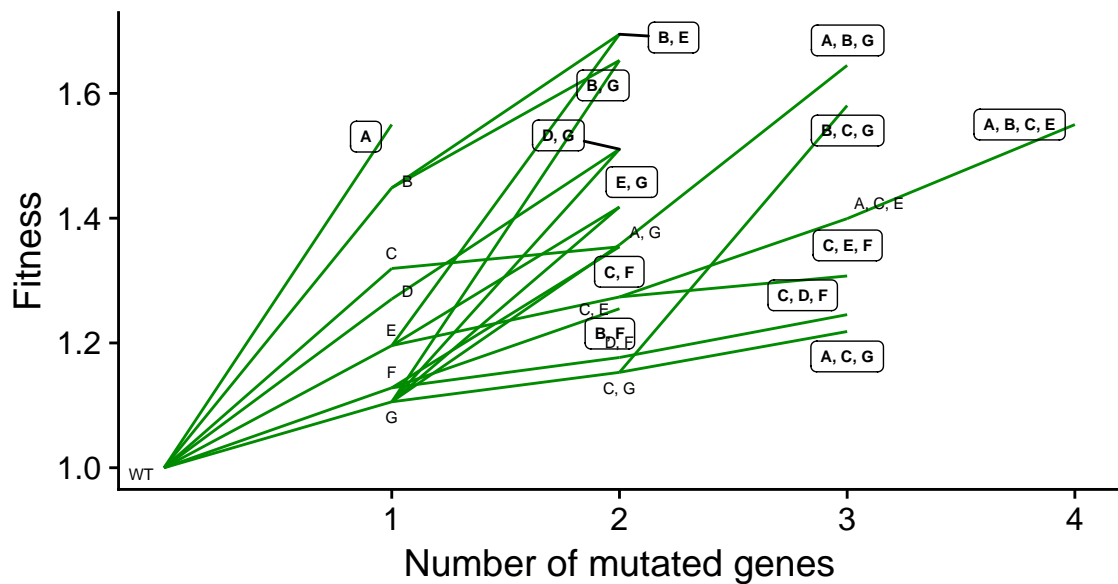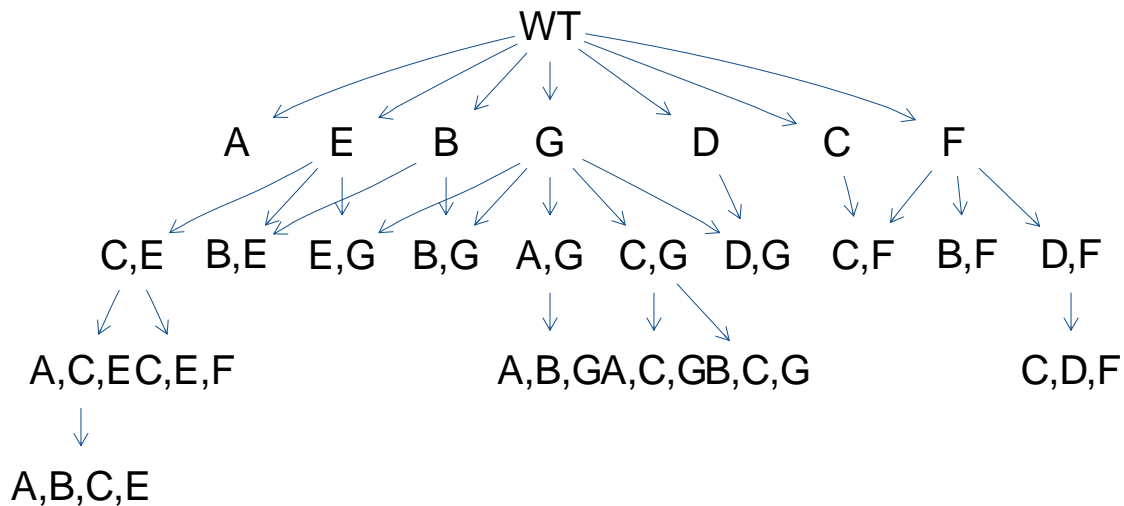



ID 3LxjVpequ1QHM105O  
 acc genotypes 26  
 peaks no back 13  
 removed edges NA  
 prop rem edges NA

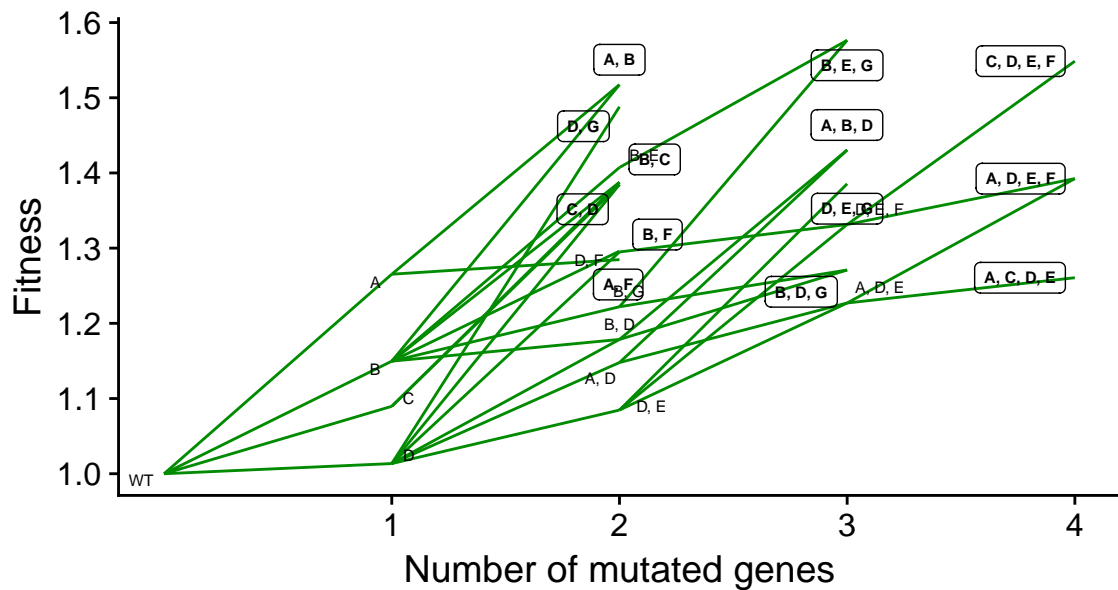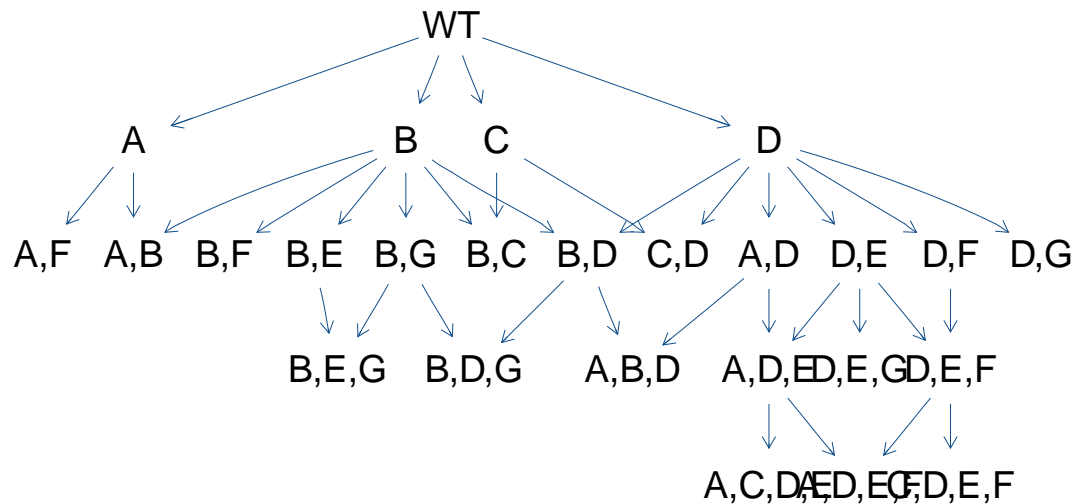



ID 4b99AWrdV4410hdsO  
 acc genotypes 78  
 peaks no back 21  
 removed edges NA  
 prop rem edges NA

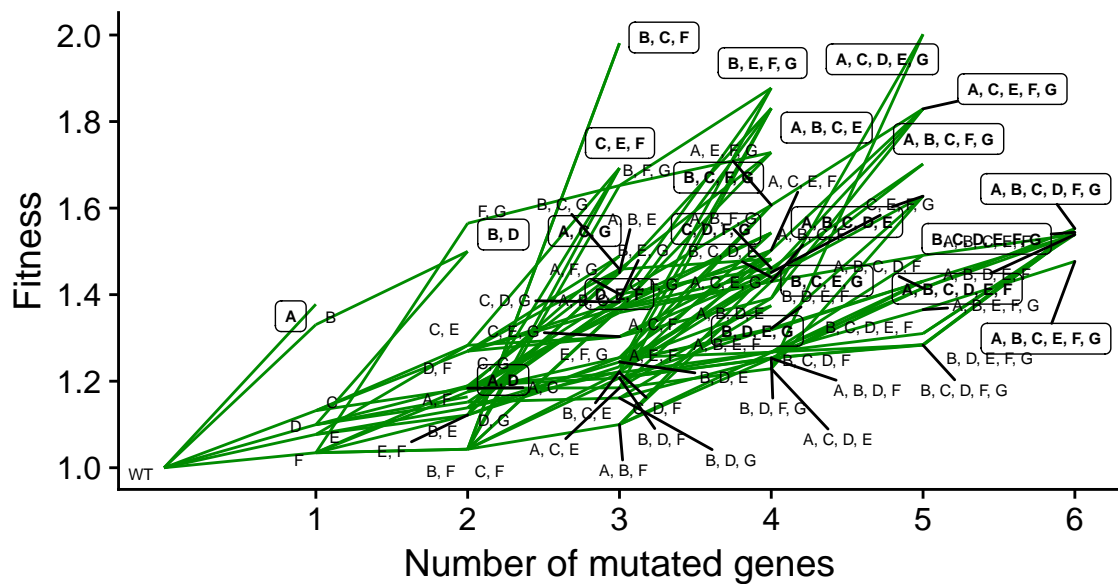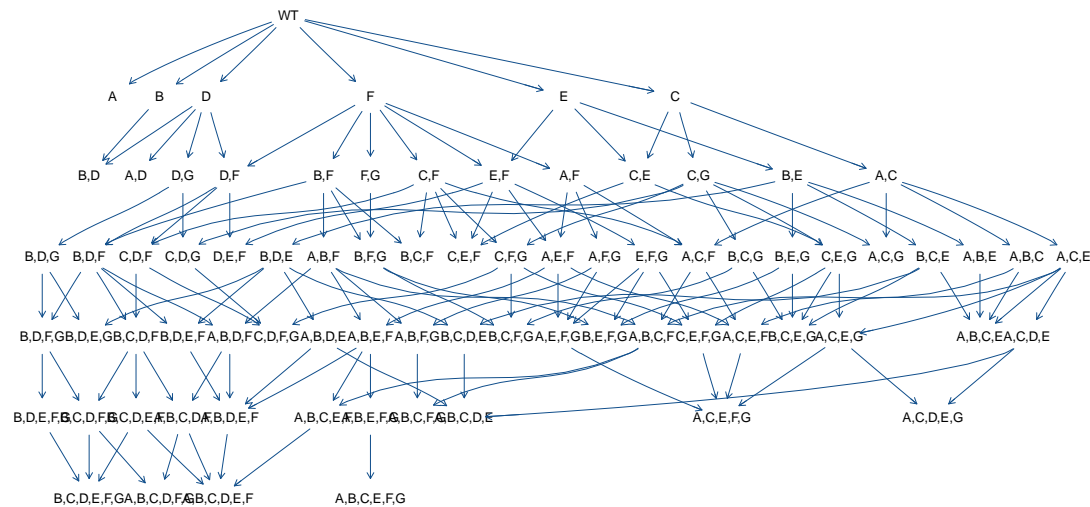

ID 4cDYPNJ8oYbtJWle  
 acc genotypes 50  
 peaks no back 13  
 removed edges NA  
 prop rem edges NA

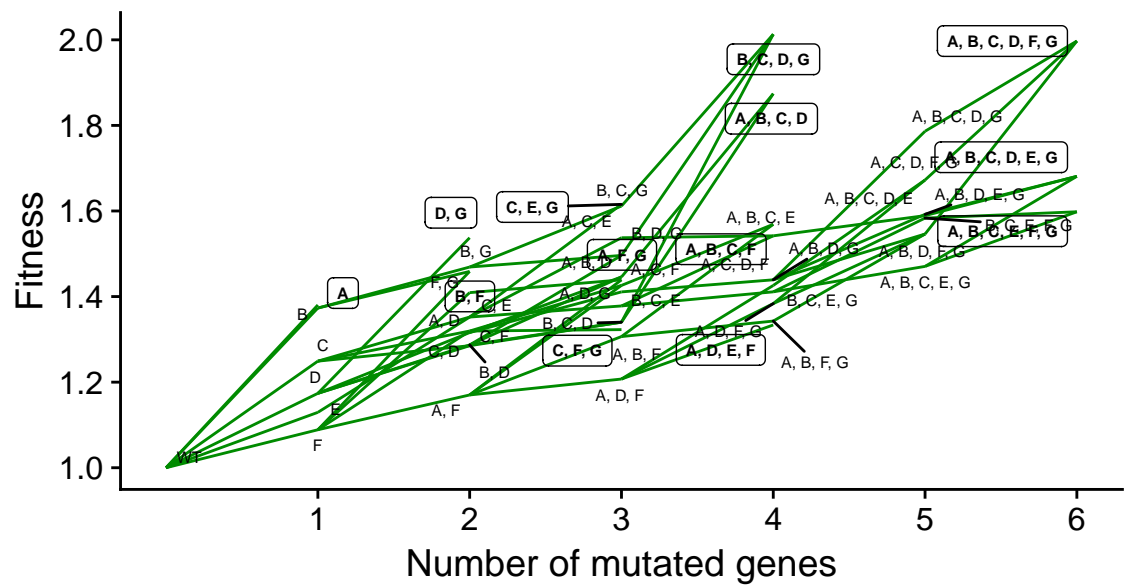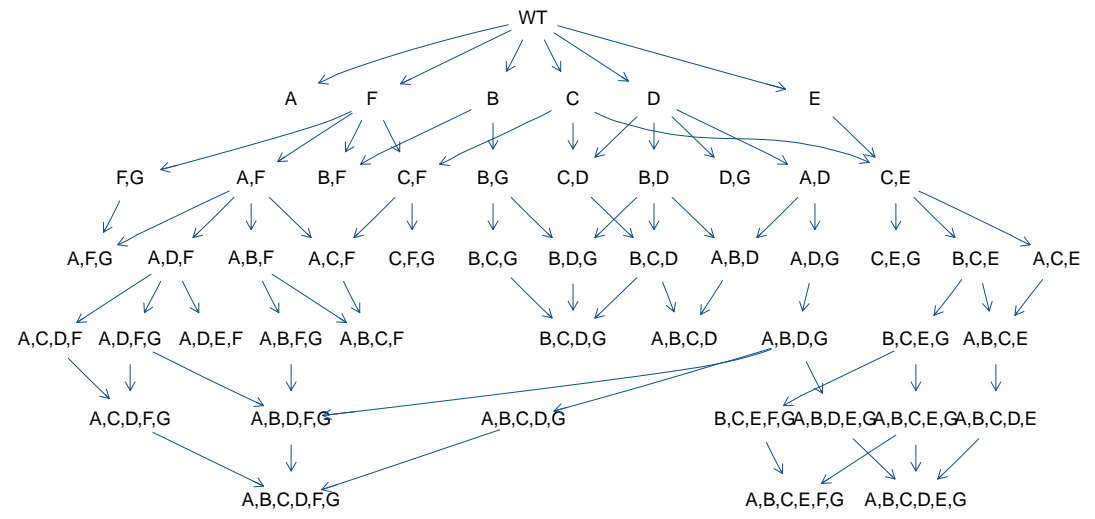

*ID* 4oM8TrevISckCyjy  
*acc genotypes* 17  
*peaks no back* 11  
*removed edges* NA  
*prop rem edges* NA

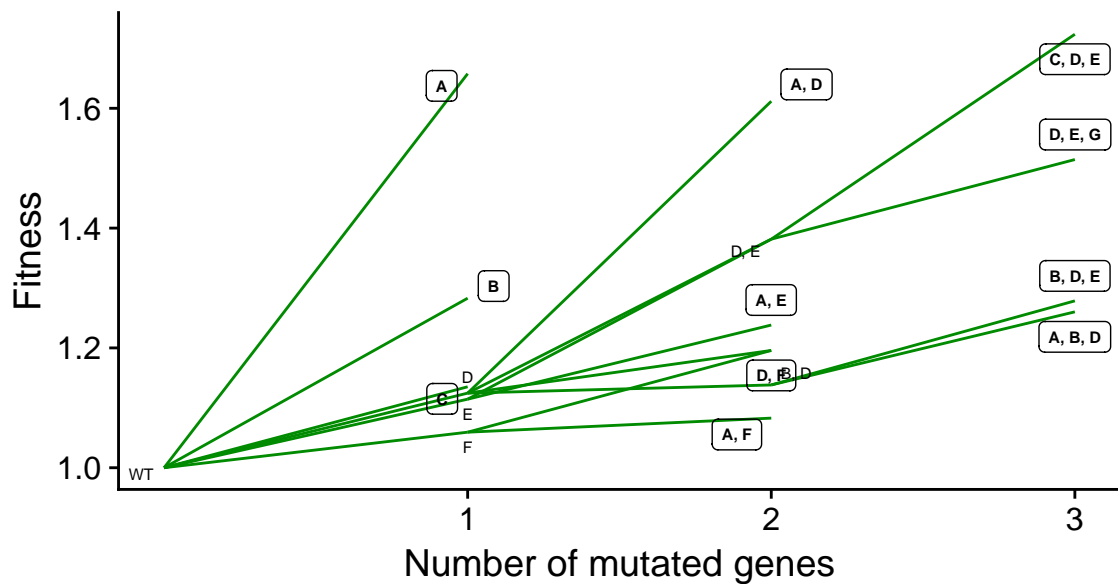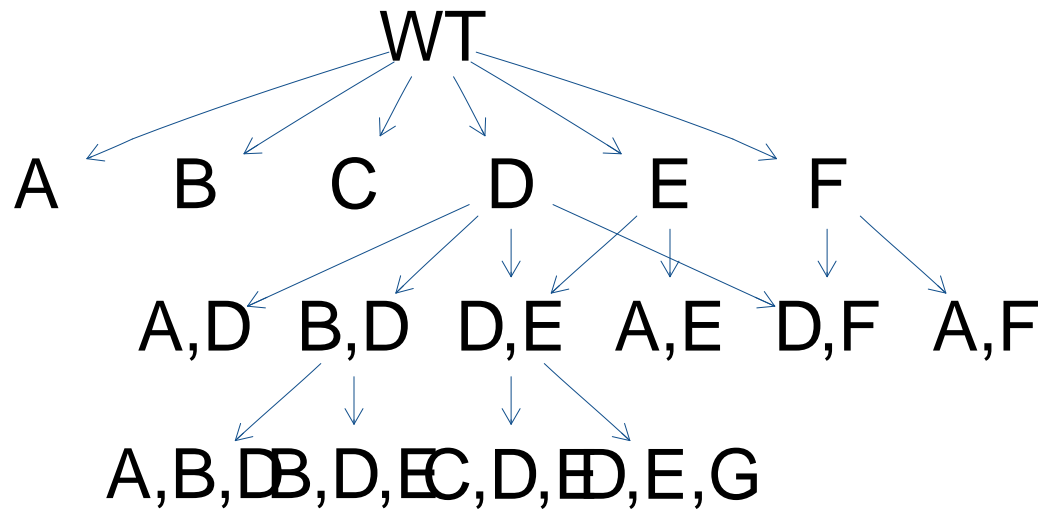

ID 4oYbhN10xm4ltLDHm  
 acc genotypes 115  
 peaks no back 12  
 removed edges NA  
 prop rem edges NA

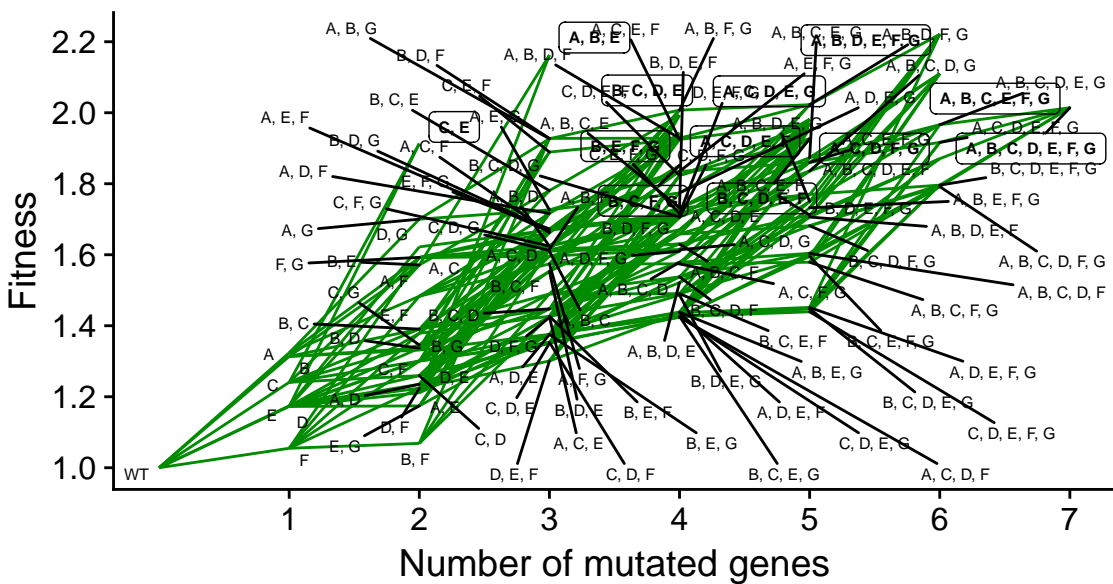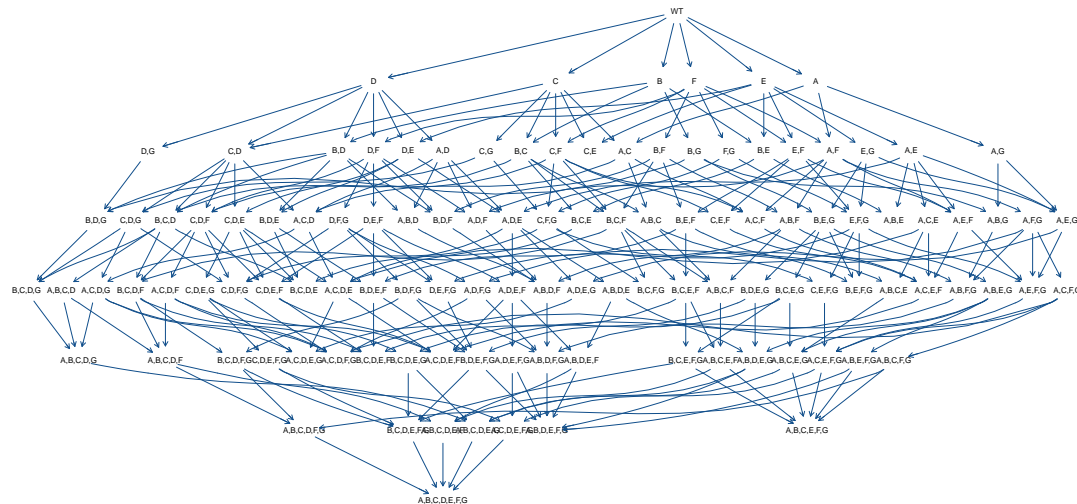

ID 4UvCBrp2StvG6sde  
 acc genotypes 68  
 peaks no back 27  
 removed edges NA  
 prop rem edges NA

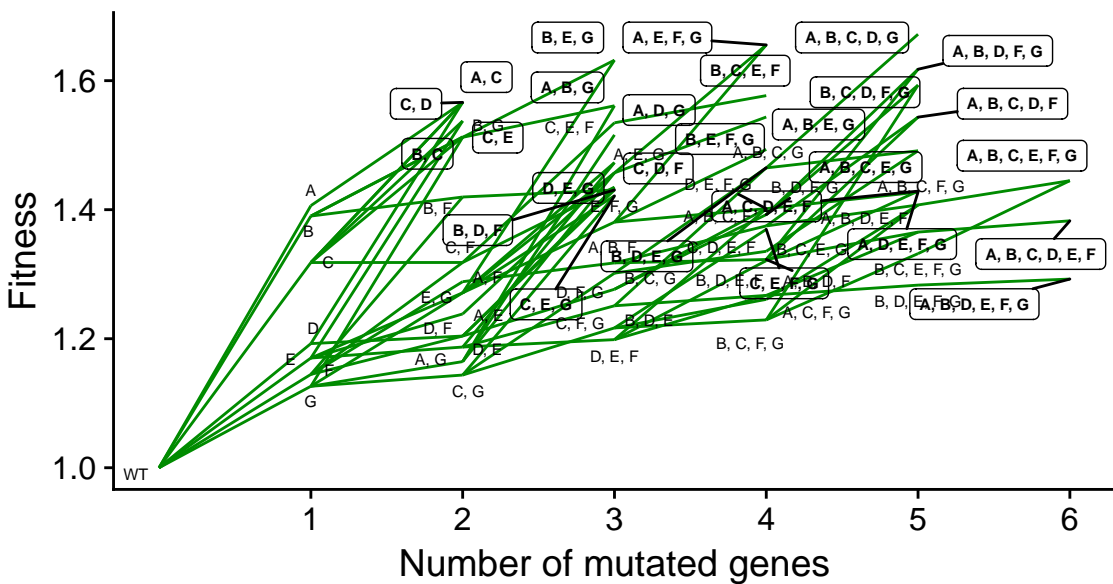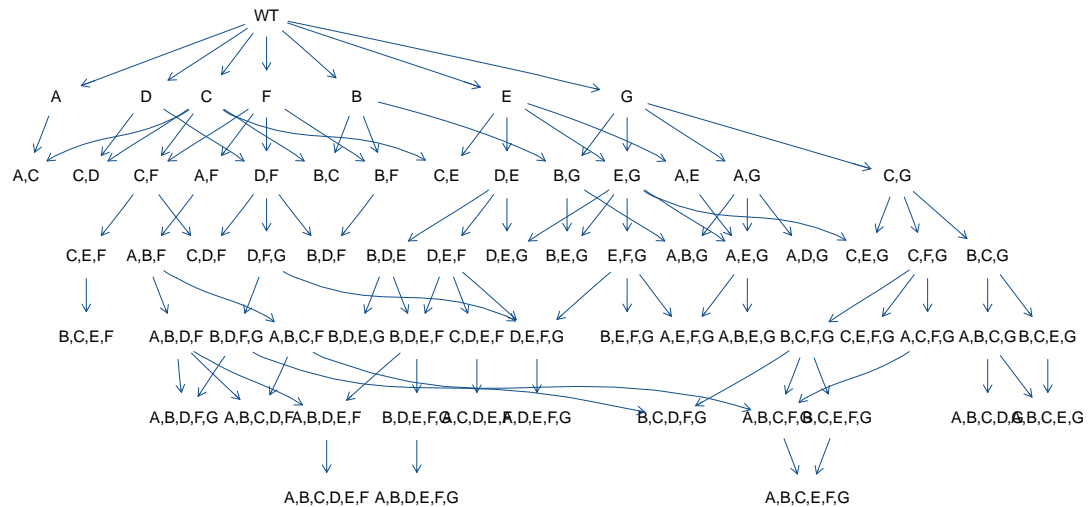

ID 4xoT2TA10PIN1Y8f9  
 acc genotypes 43  
 peaks no back 17  
 removed edges NA  
 prop rem edges NA

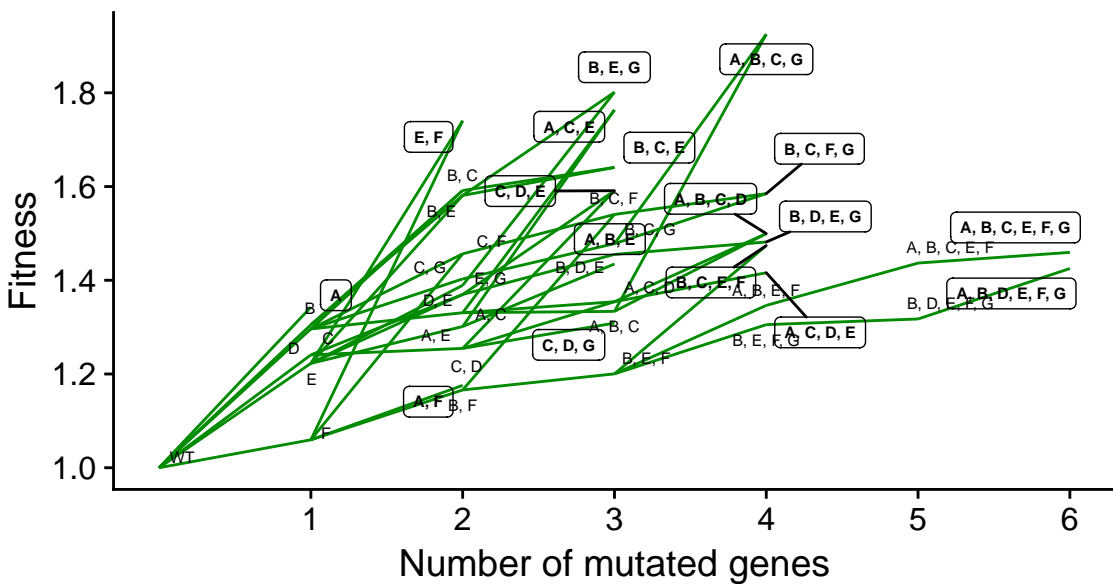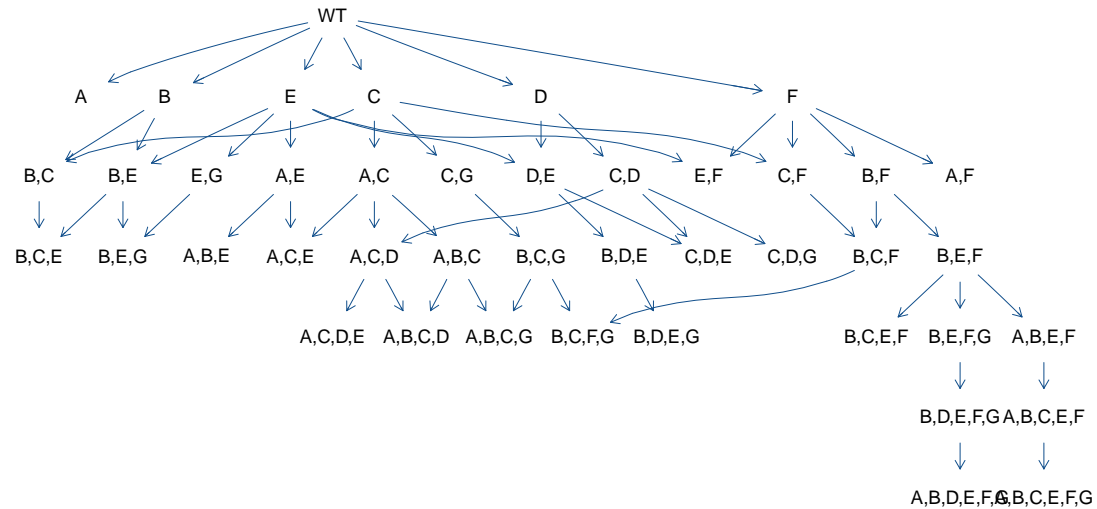



ID 5cropZmgpoQ1ehPe  
 acc genotypes 33  
 peaks no back 13  
 removed edges NA  
 prop rem edges NA

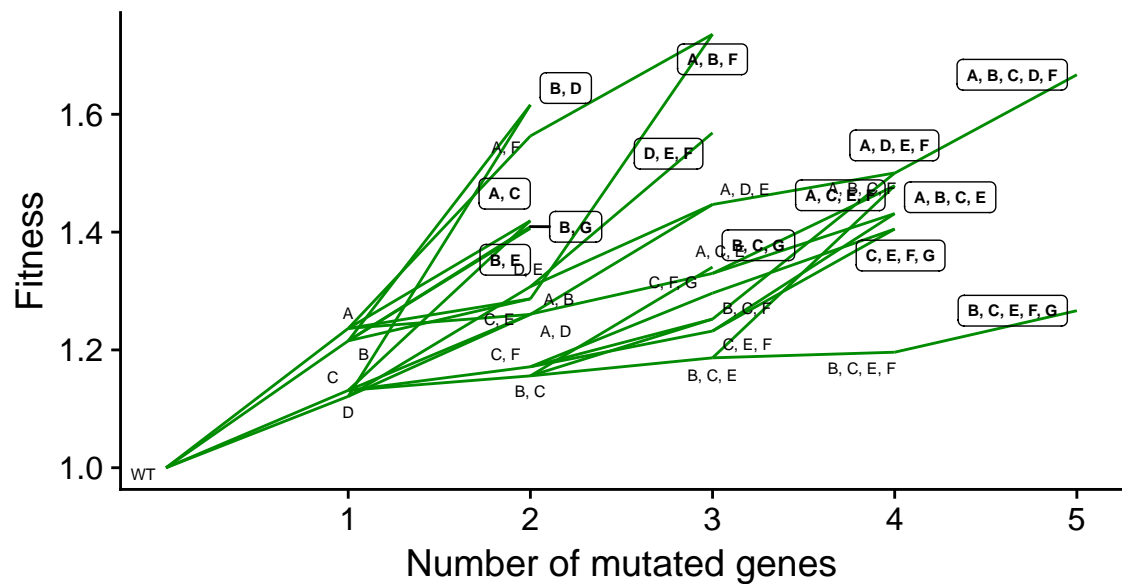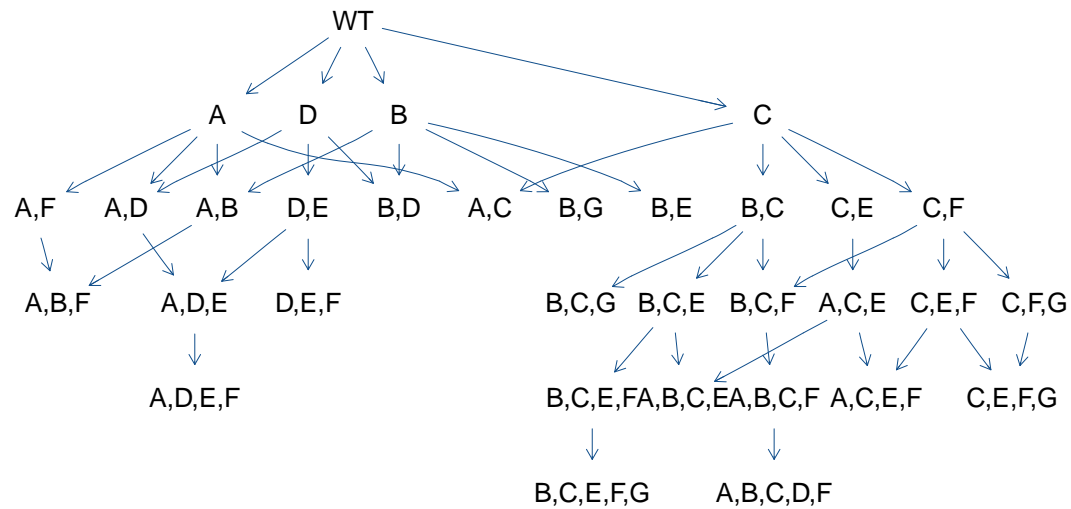

ID 5epf10NPUUcYzNrU9  
 acc genotypes 46  
 peaks no back 7  
 removed edges NA  
 prop rem edges NA

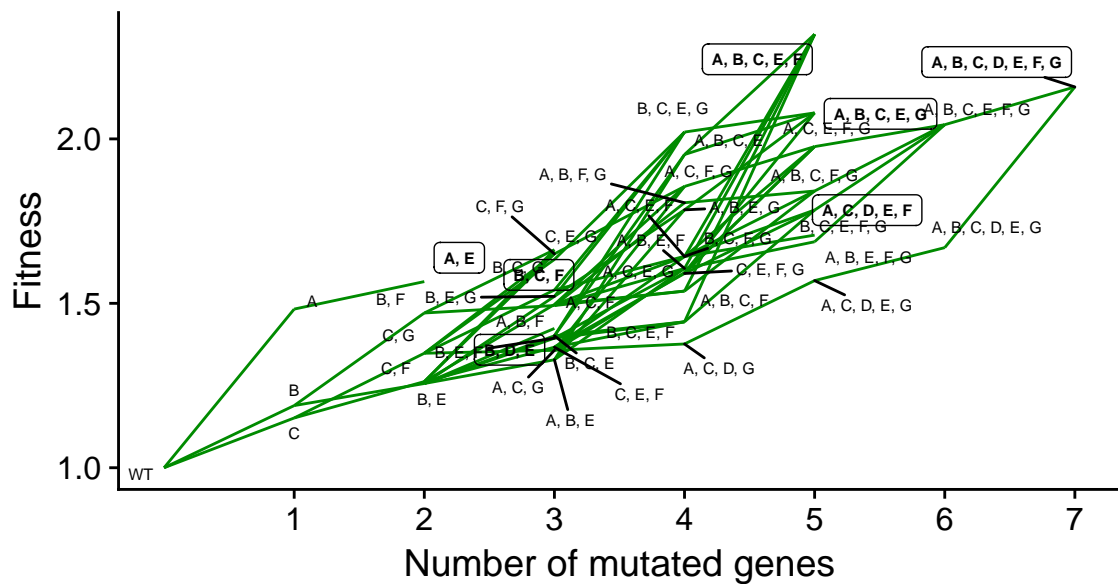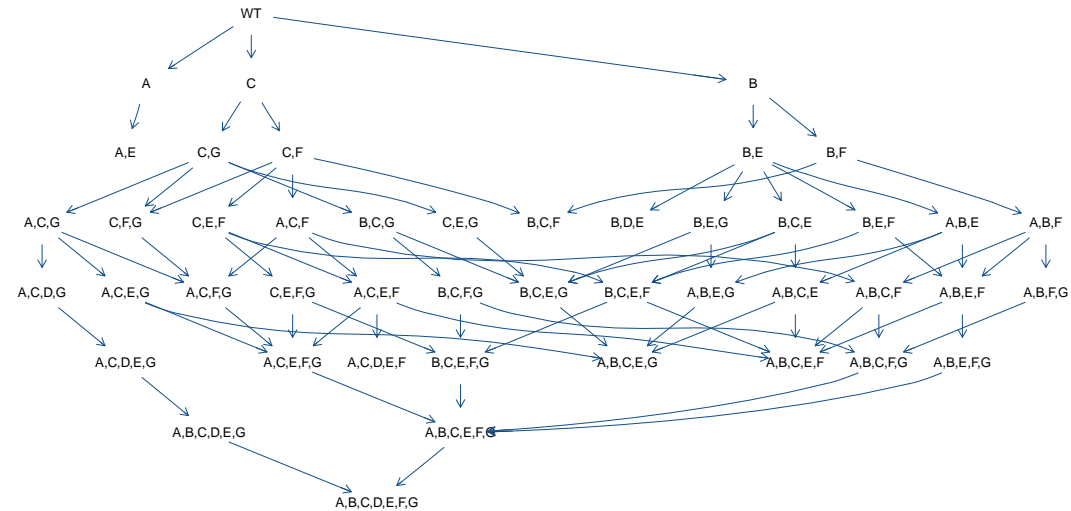

ID 5J10fJoXgl3k5FMVe  
 acc genotypes 81  
 peaks no back 18  
 removed edges NA  
 prop rem edges NA

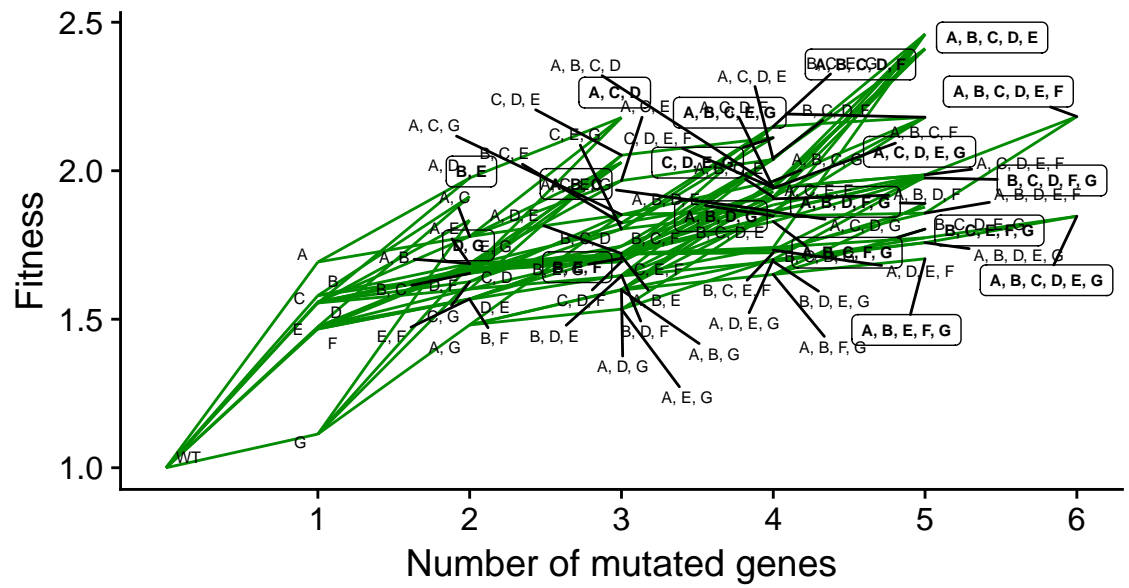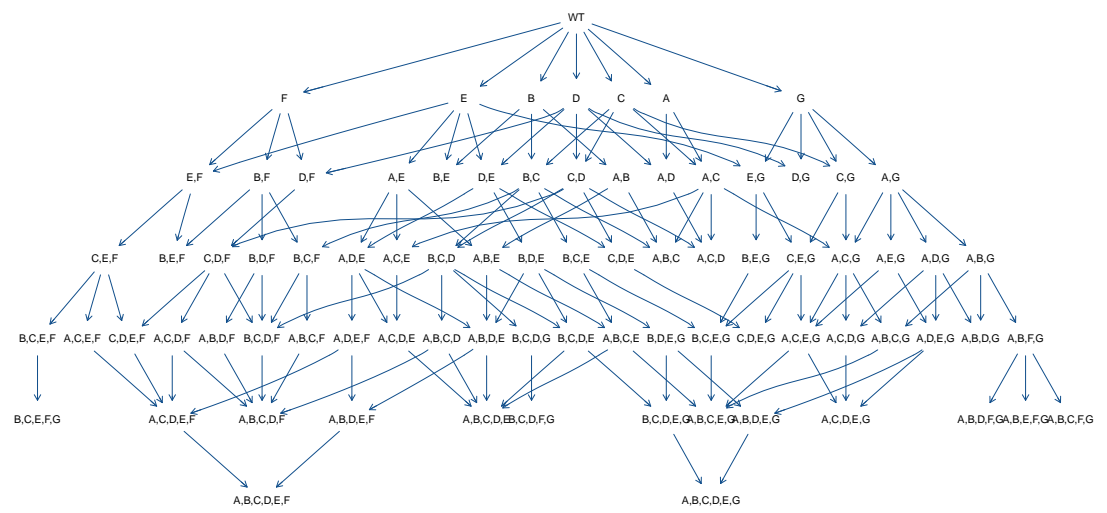



ID 5MozgxpY4MNYCtSZ  
 acc genotypes 80  
 peaks no back 28  
 removed edges NA  
 prop rem edges NA

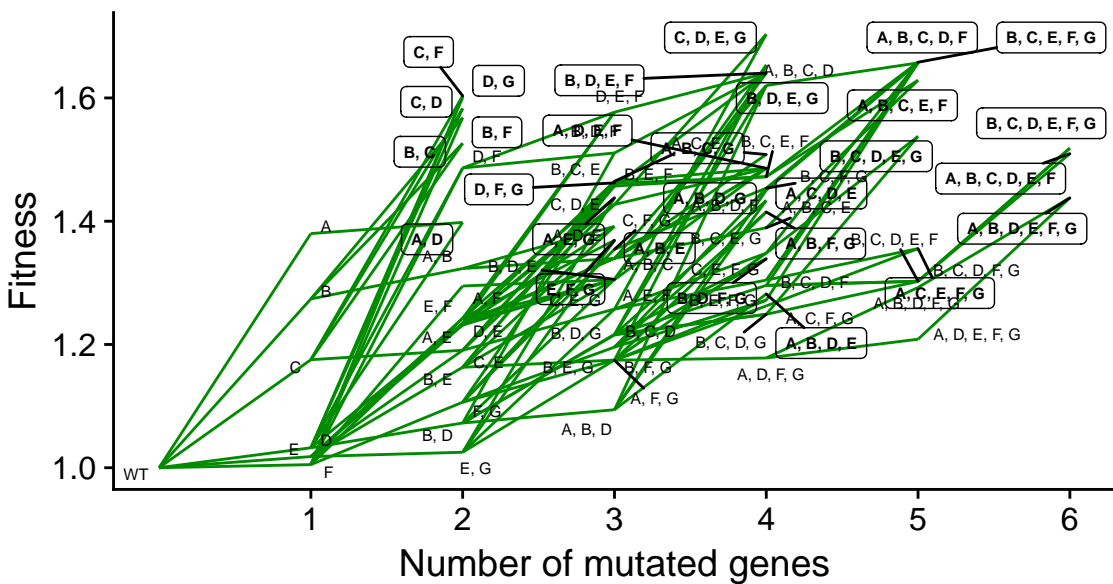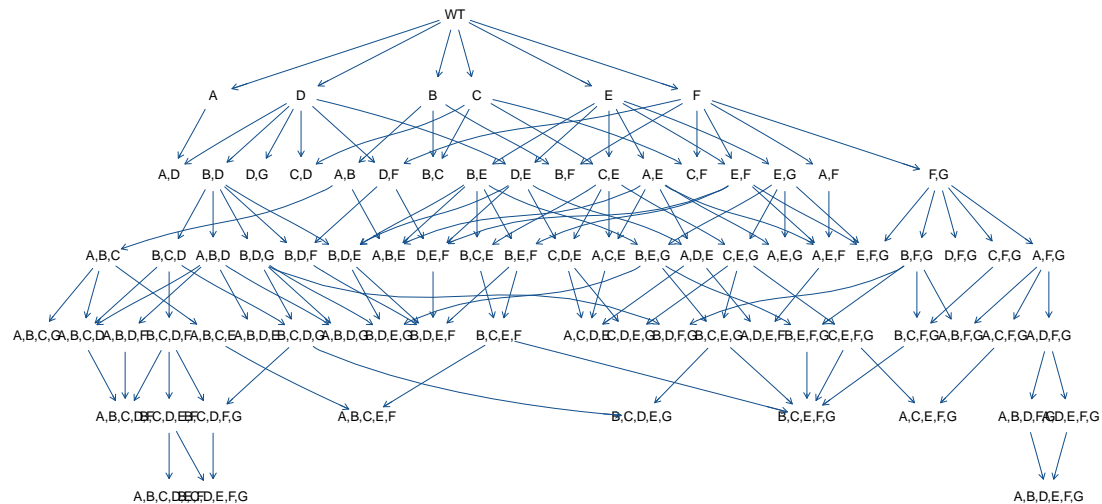

ID 6ARgJvIlfN23NjA4  
 acc genotypes 81  
 peaks no back 22  
 removed edges NA  
 prop rem edges NA

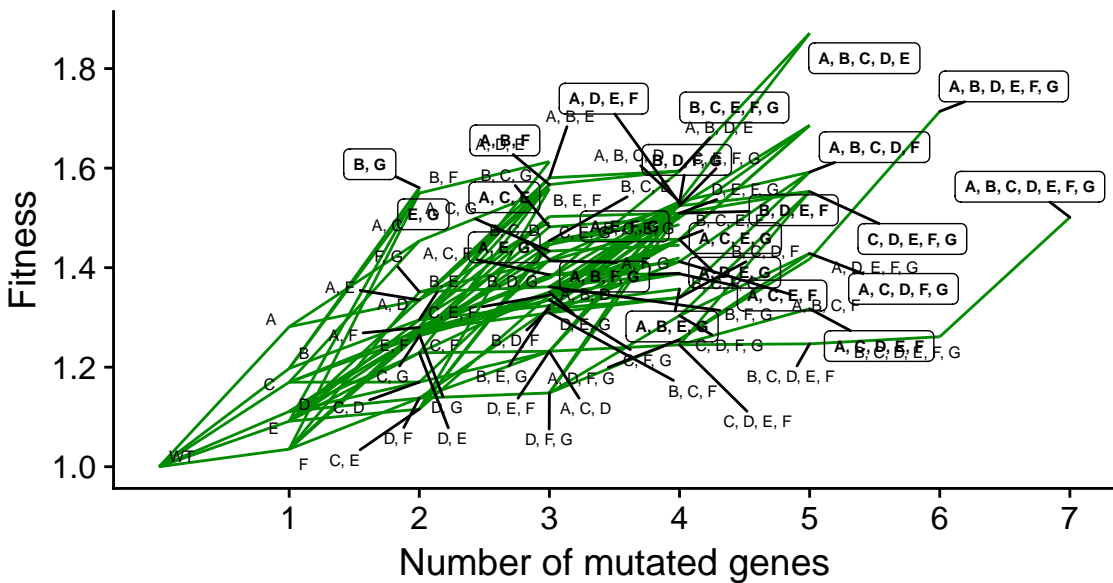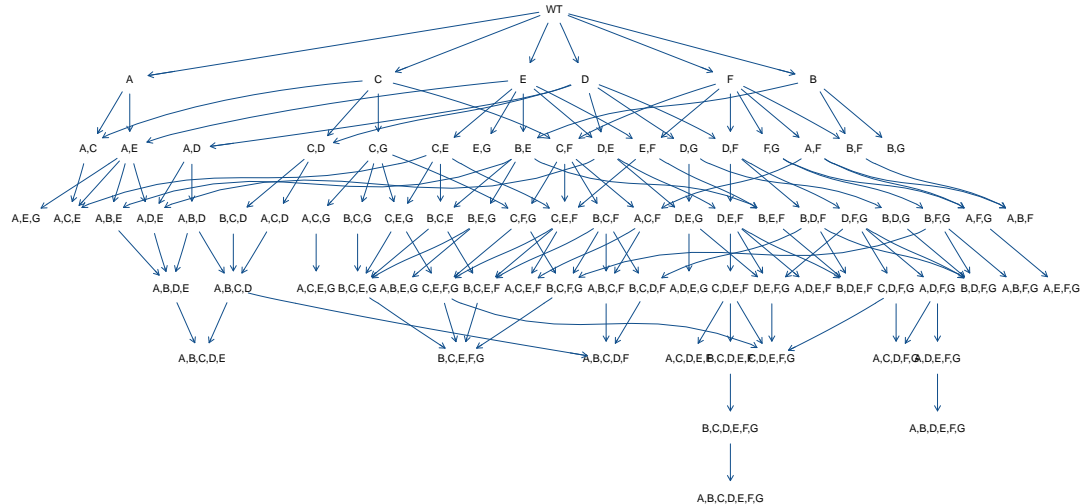

ID 6grkdzP10lm6kQ42g  
 acc genotypes 81  
 peaks no back 12  
 removed edges NA  
 prop rem edges NA

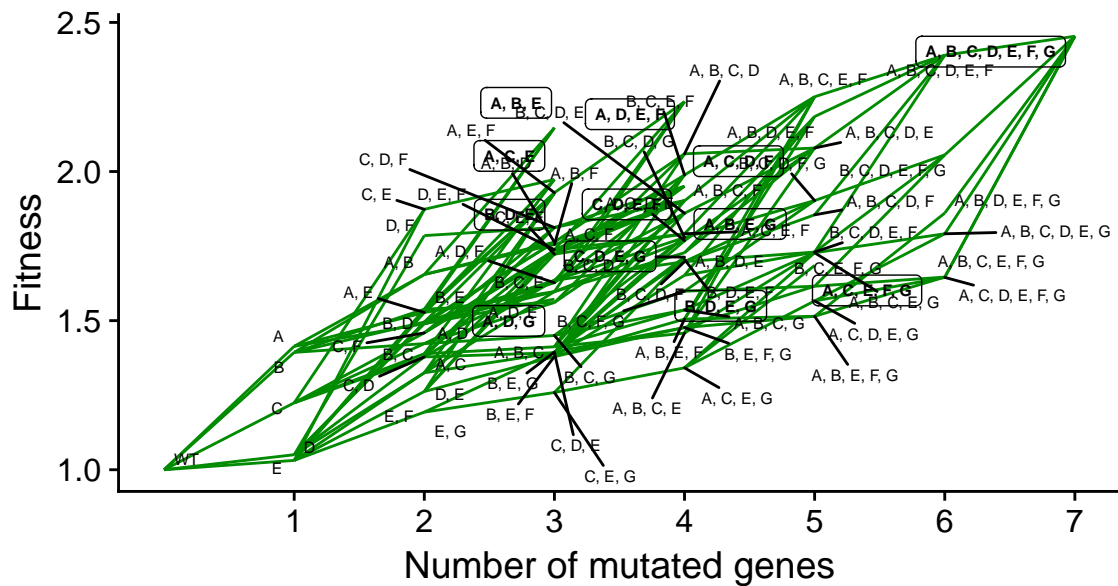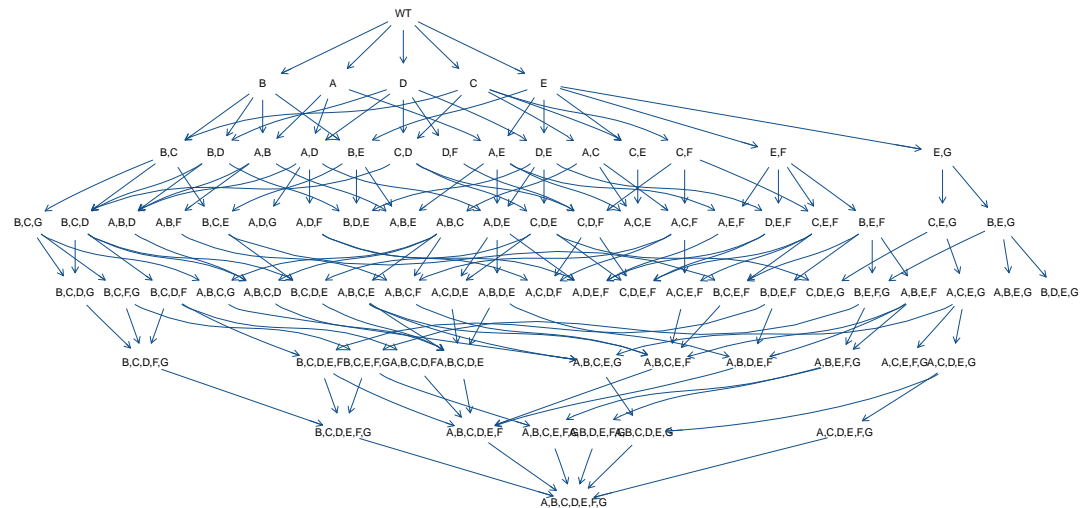

ID 75PXrtvV107d4XbmV  
 acc genotypes 70  
 peaks no back 19  
 removed edges NA  
 prop rem edges NA

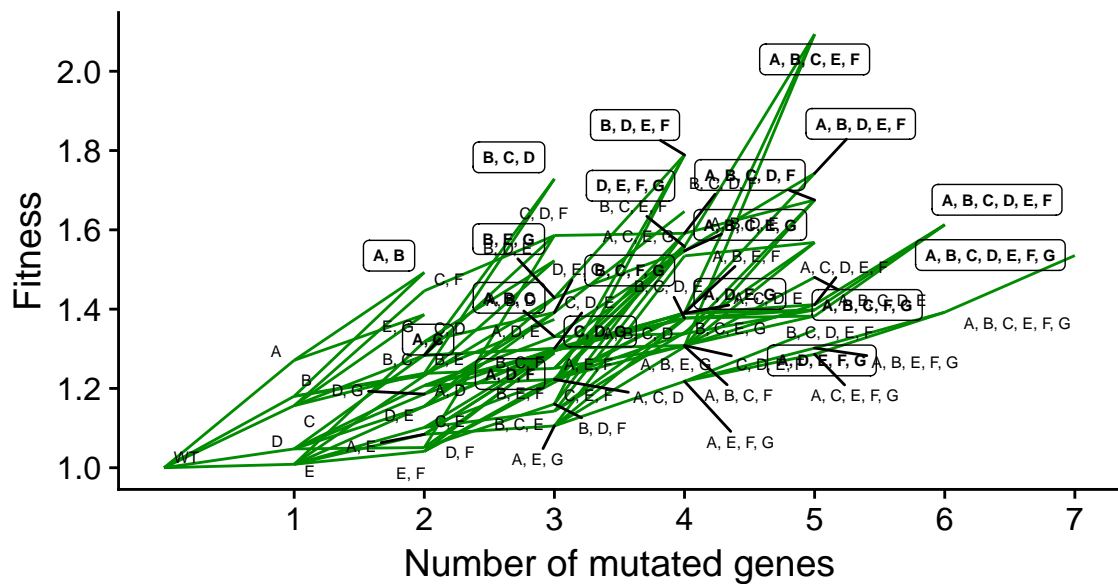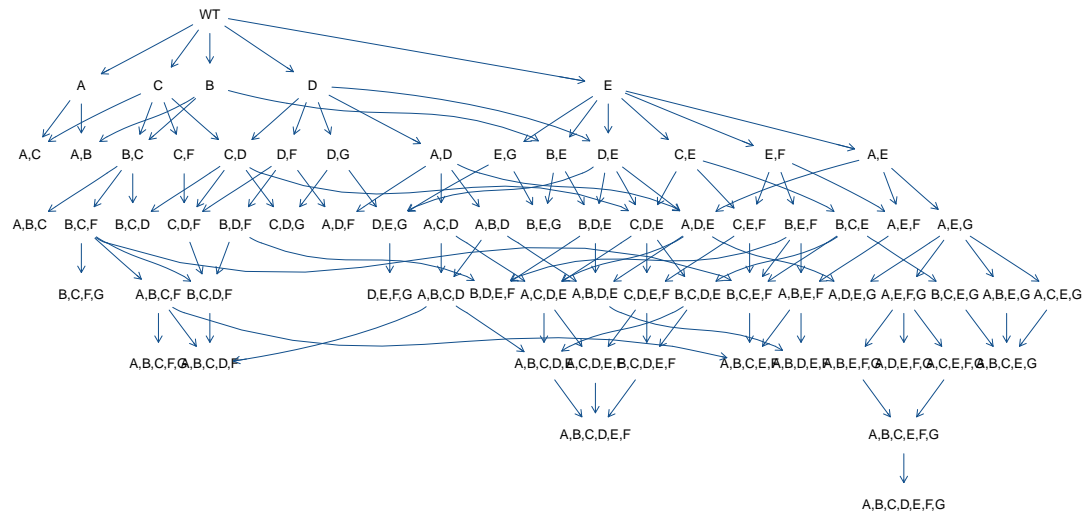





ID 84uleheQaYaVNux8  
 acc genotypes 18  
 peaks no back 6  
 removed edges NA  
 prop rem edges NA

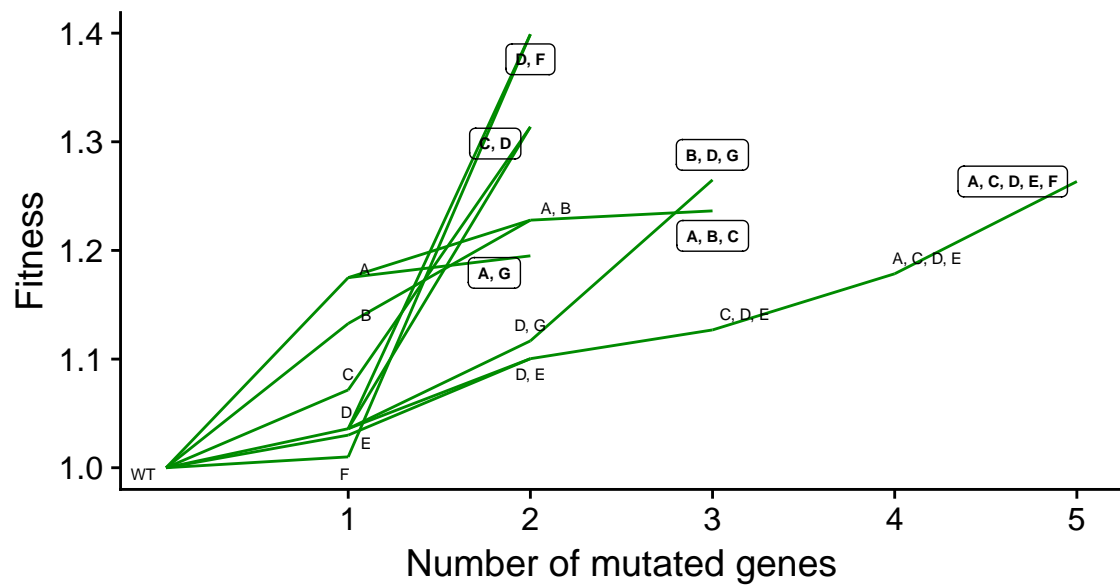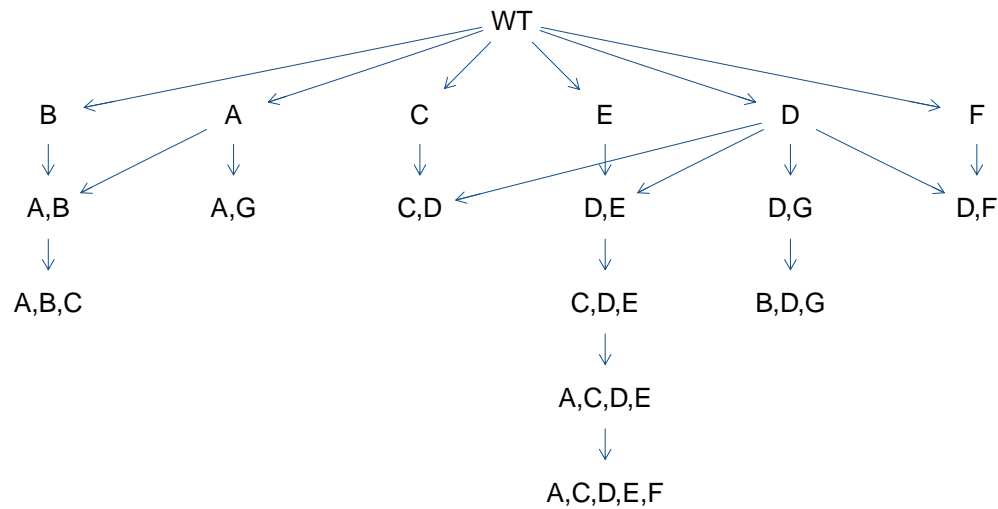

ID 8a9vNjyhKyFzgtGI  
 acc genotypes 29  
 peaks no back 6  
 removed edges NA  
 prop rem edges NA

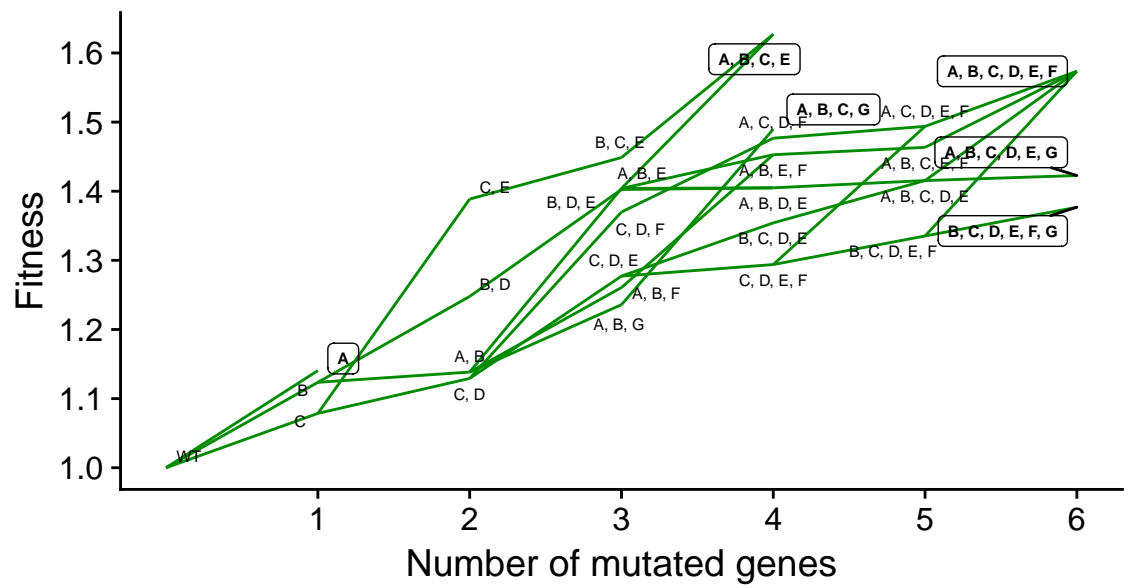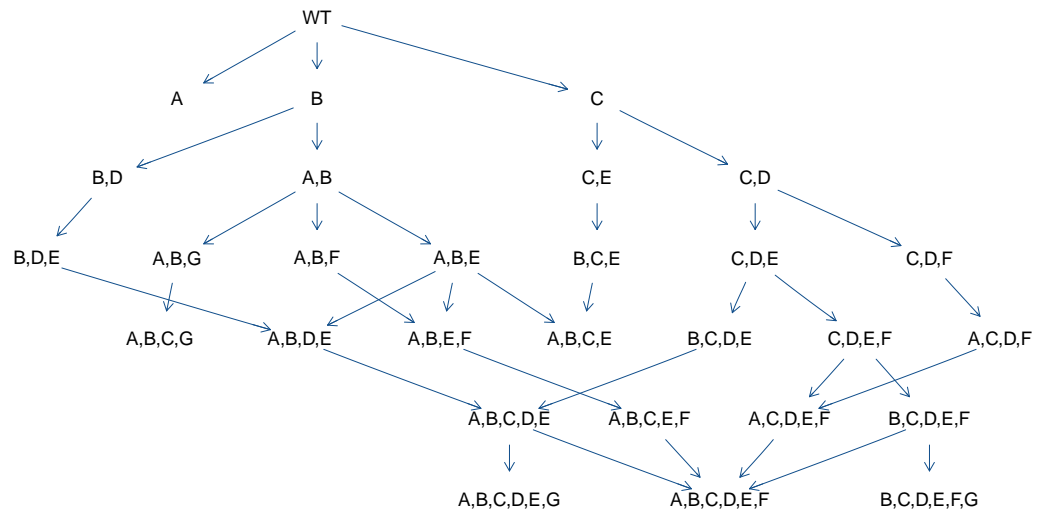

ID 8UysAOd1WpNJ6JEA  
 acc genotypes 67  
 peaks no back 15  
 removed edges NA  
 prop rem edges NA

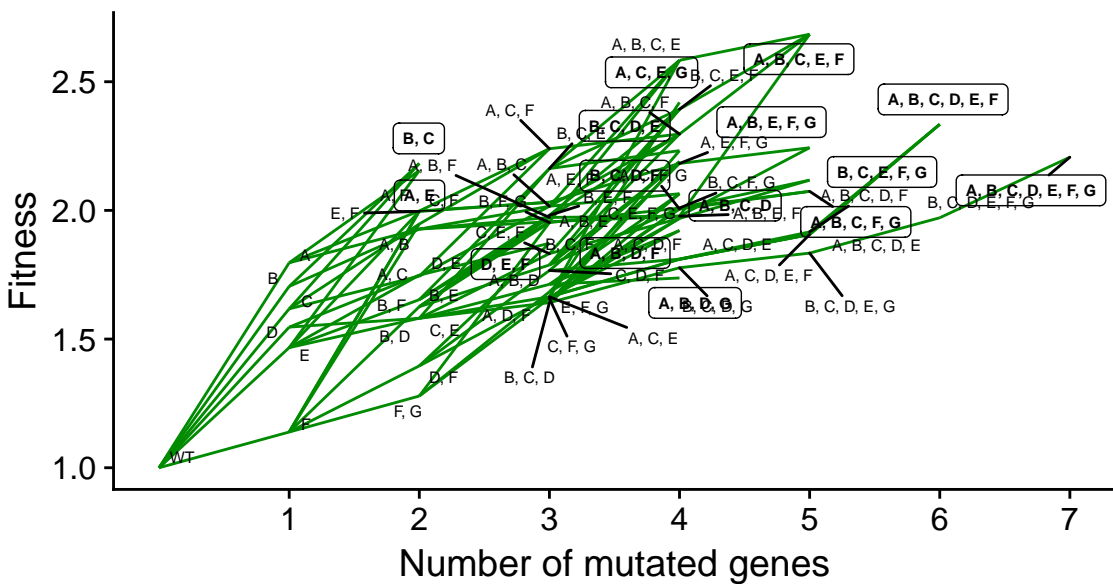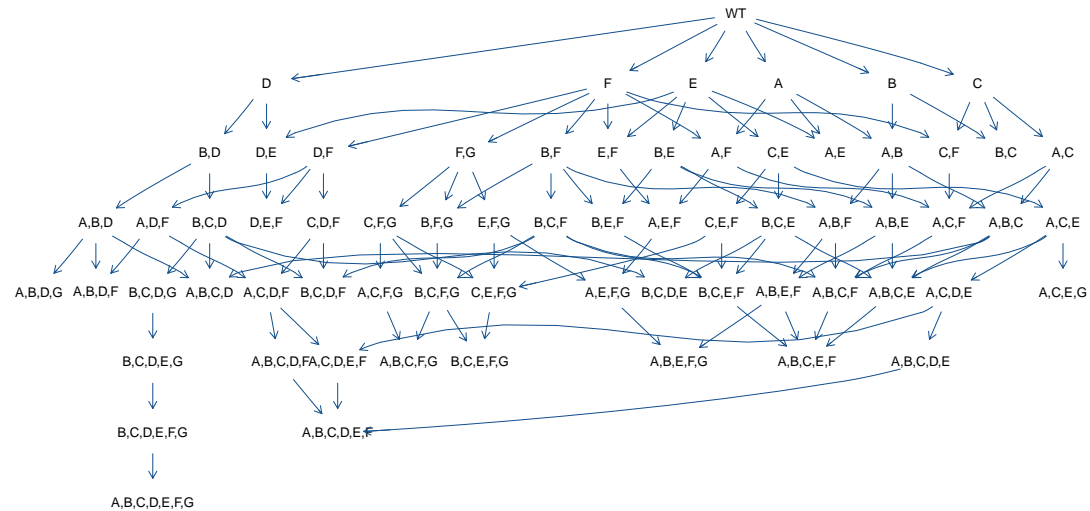

ID [8yQFIKWNFgRItIOW](#)  
 acc genotypes 40  
 peaks no back 18  
 removed edges NA  
 prop rem edges NA

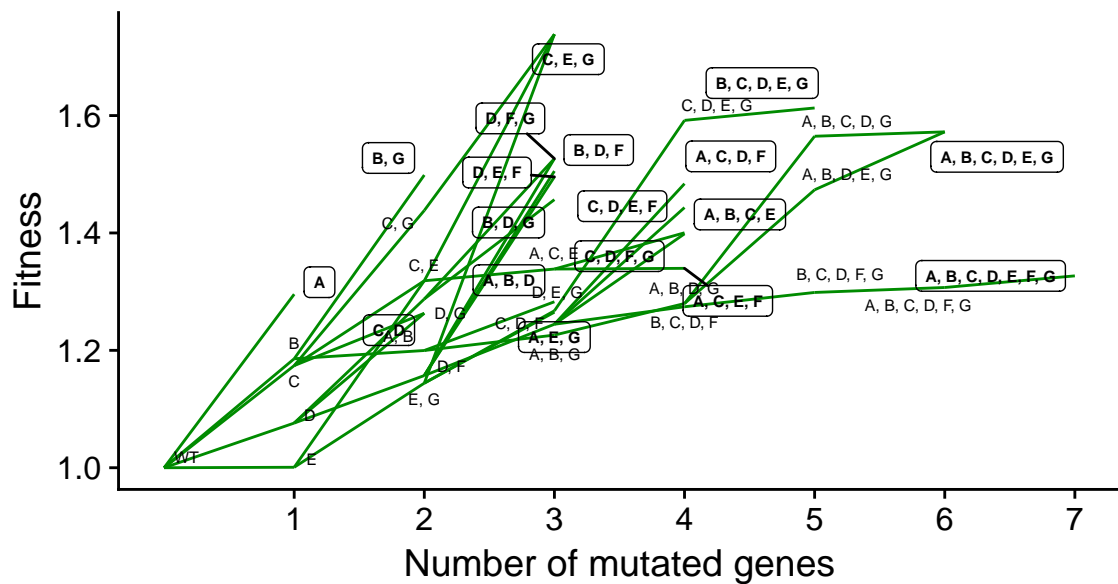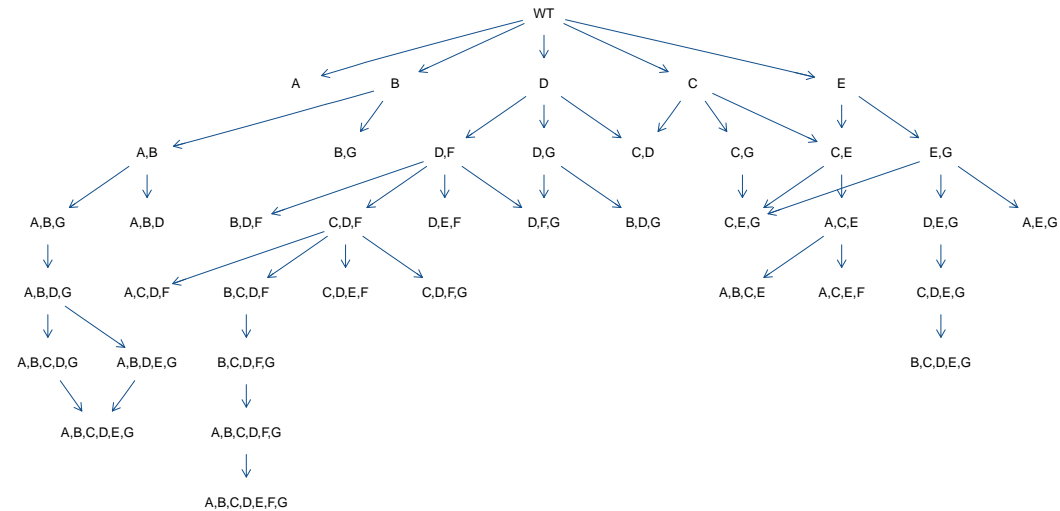

ID 98Ltpa3IXTnc4zbC  
 acc genotypes 29  
 peaks no back 12  
 removed edges NA  
 prop rem edges NA

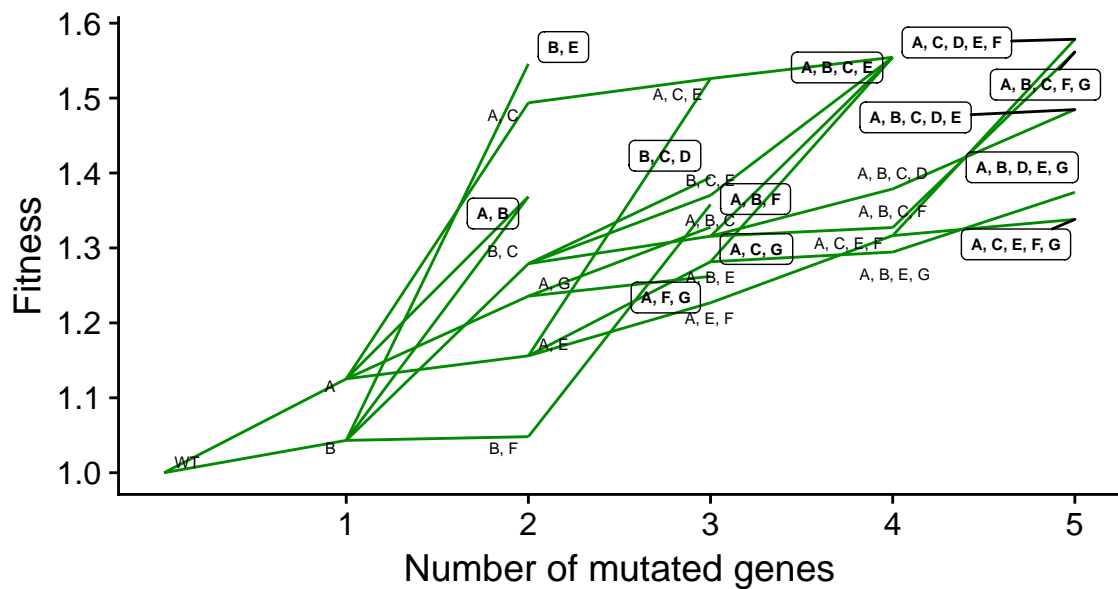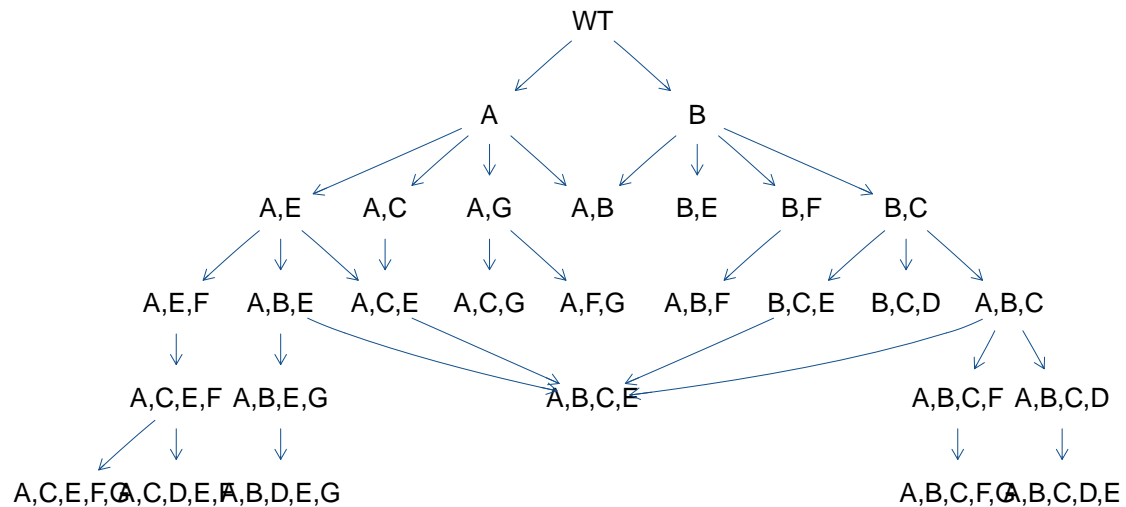

ID 9KrYrcUaMB05BoOd  
 acc genotypes 89  
 peaks no back 13  
 removed edges NA  
 prop rem edges NA

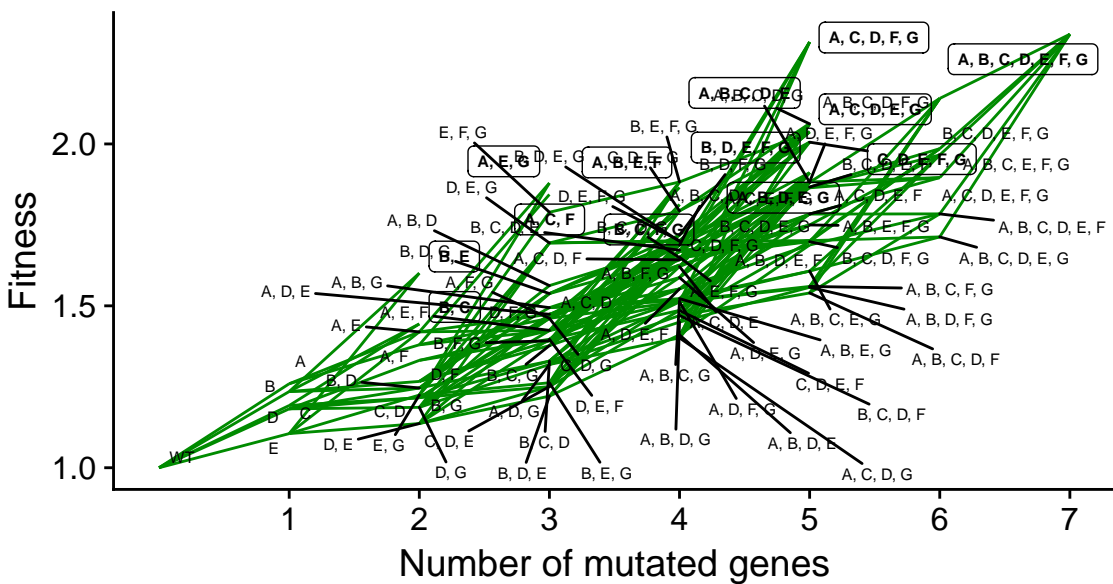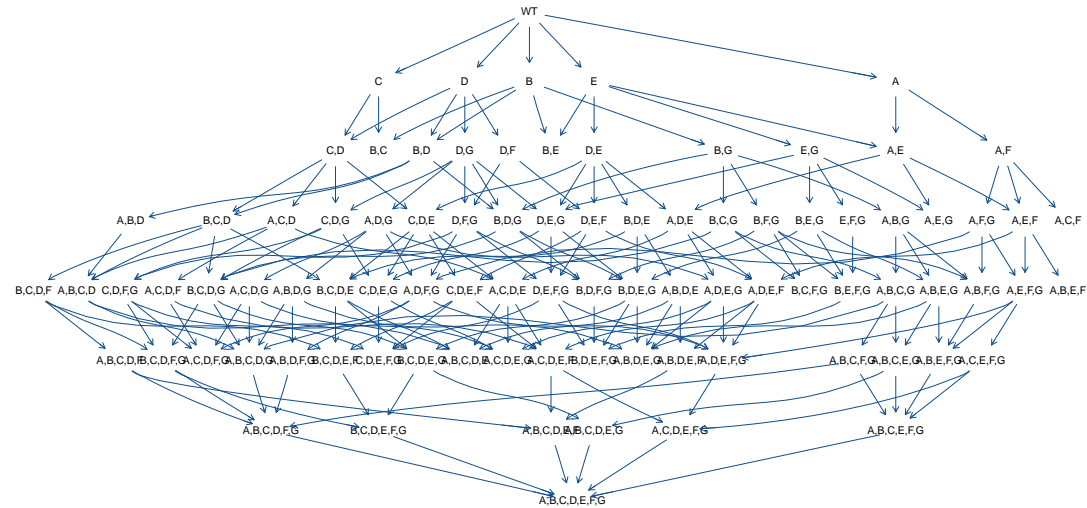

ID 9MBO3qg10BvSTzUqM  
 acc genotypes 52  
 peaks no back 15  
 removed edges NA  
 prop rem edges NA

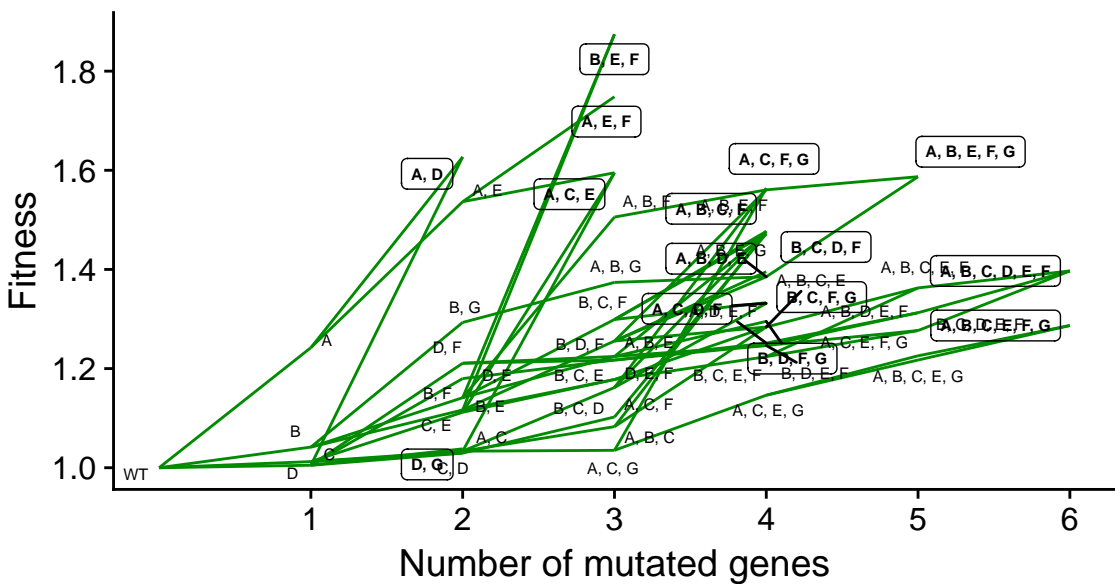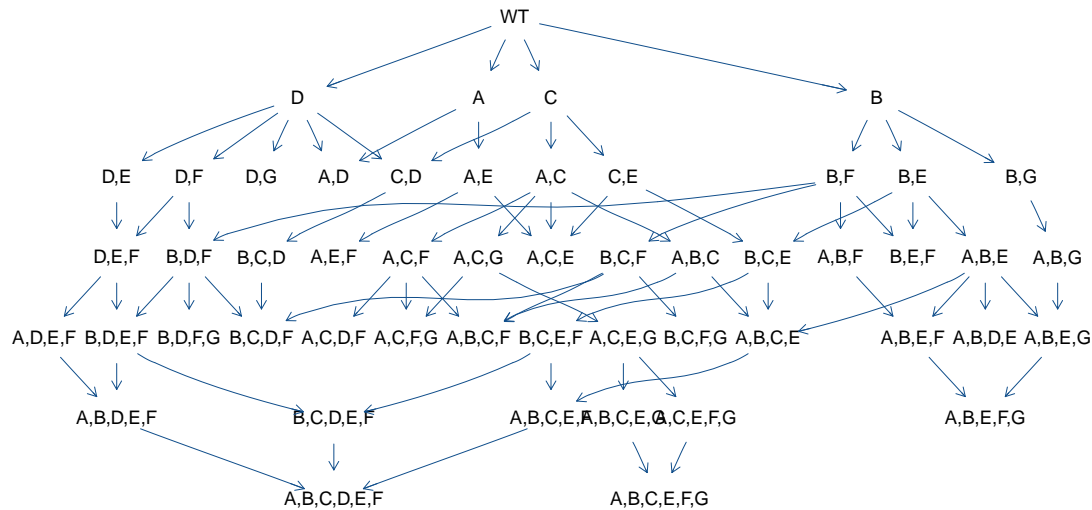



ID 9rebvtcu7f5fc6O  
 acc genotypes 38  
 peaks no back 12  
 removed edges NA  
 prop rem edges NA

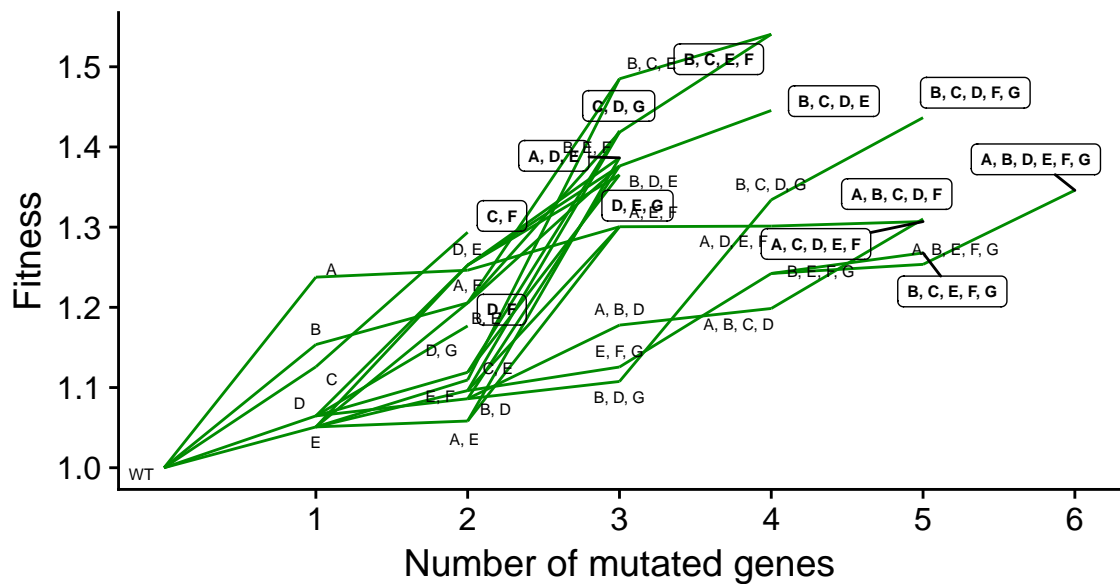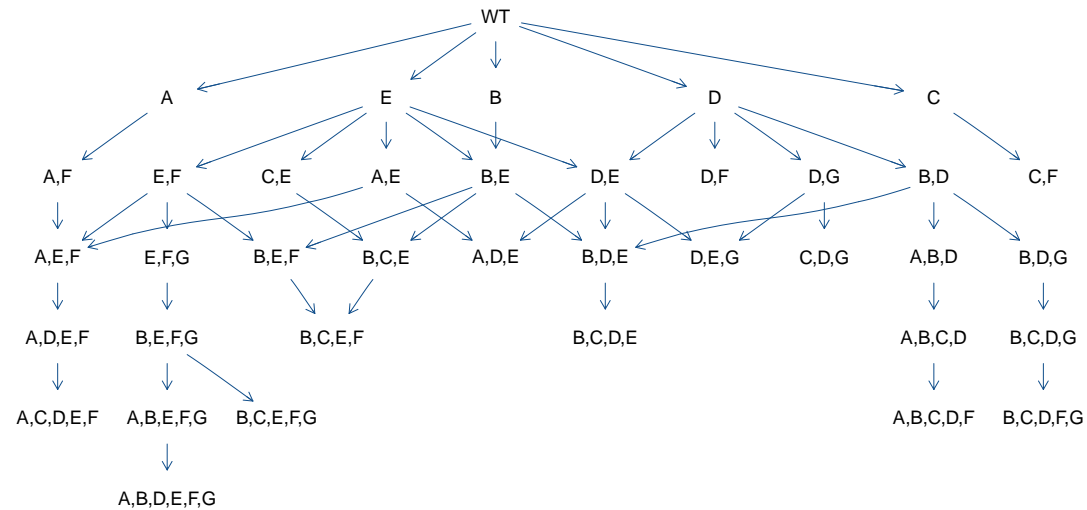

ID **A3LrldXjUIno4iNV**  
 acc genotypes **77**  
 peaks no back **19**  
 removed edges **NA**  
 prop rem edges **NA**

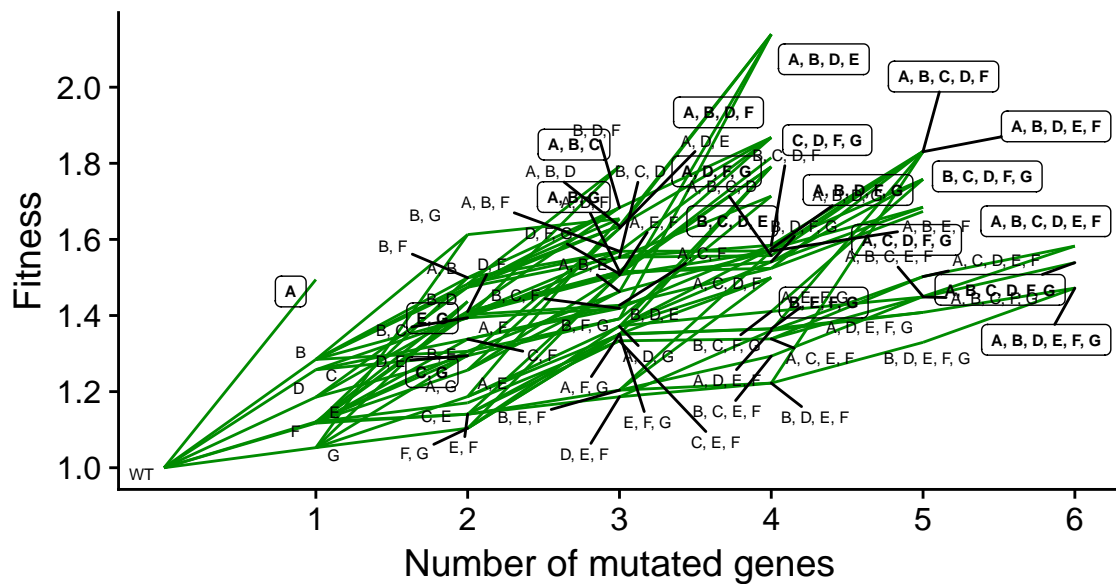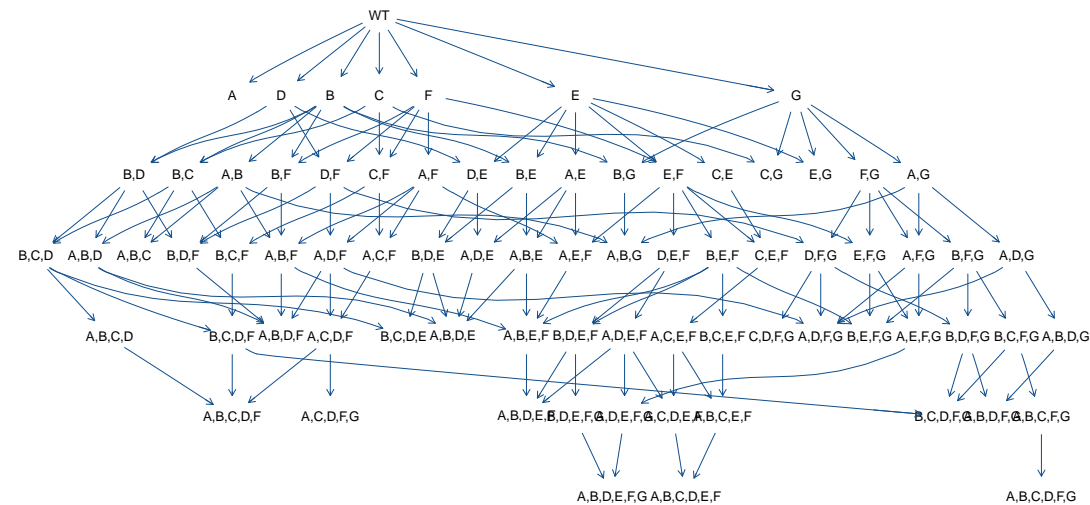

ID aA3KFQazfmWZiKVN  
 acc genotypes 54  
 peaks no back 20  
 removed edges NA  
 prop rem edges NA

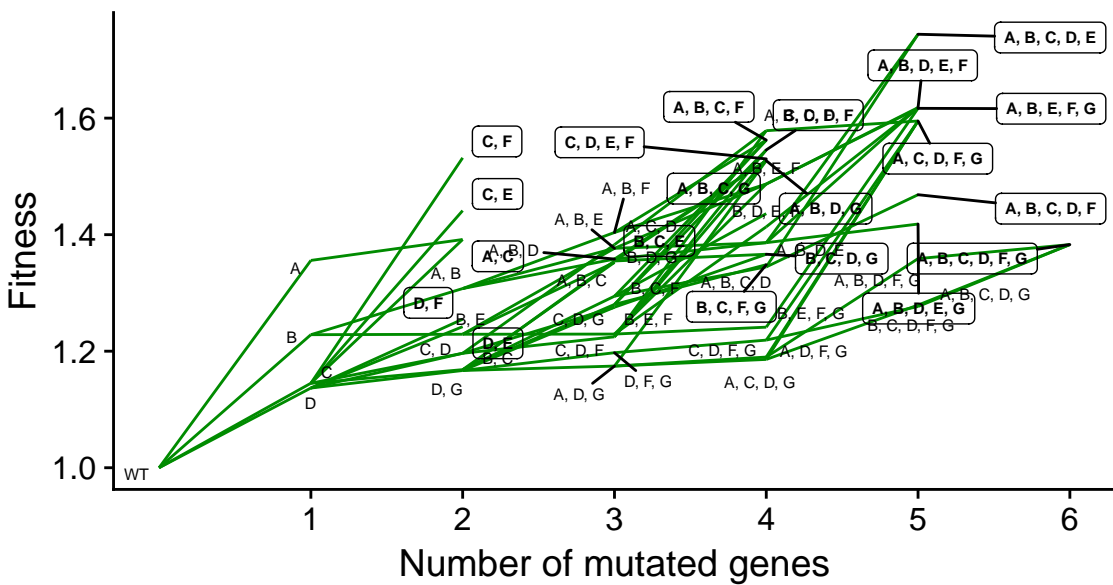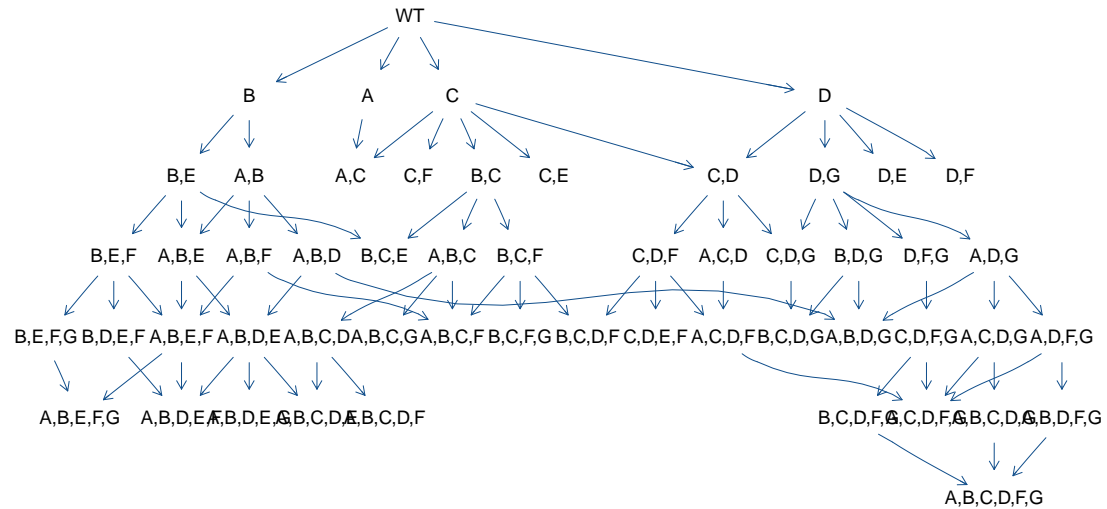

ID **ACGaLODBO3L7xXPK**  
 acc genotypes **70**  
 peaks no back **19**  
 removed edges **NA**  
 prop rem edges **NA**

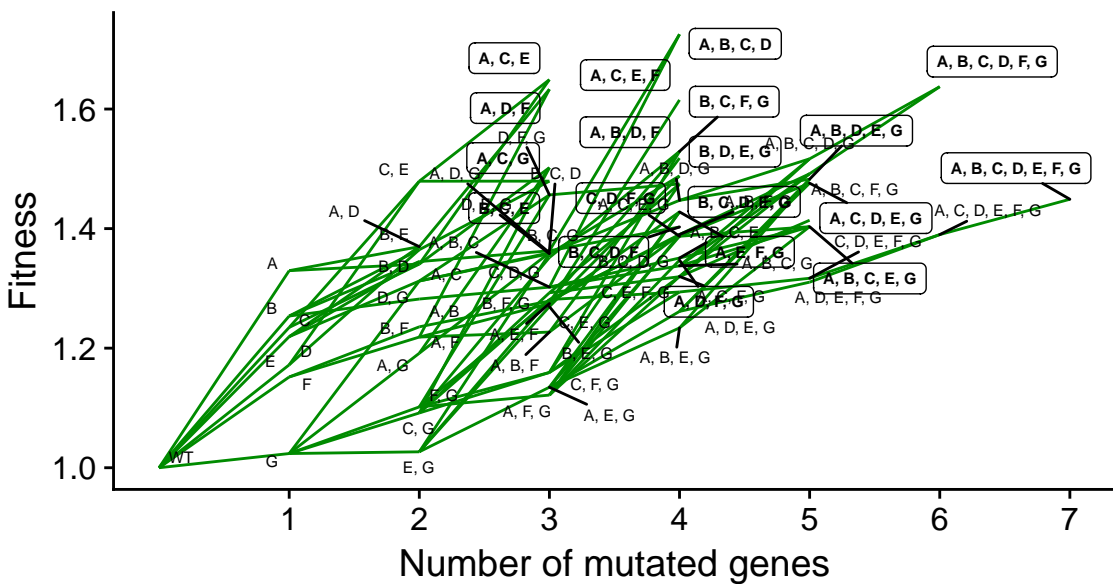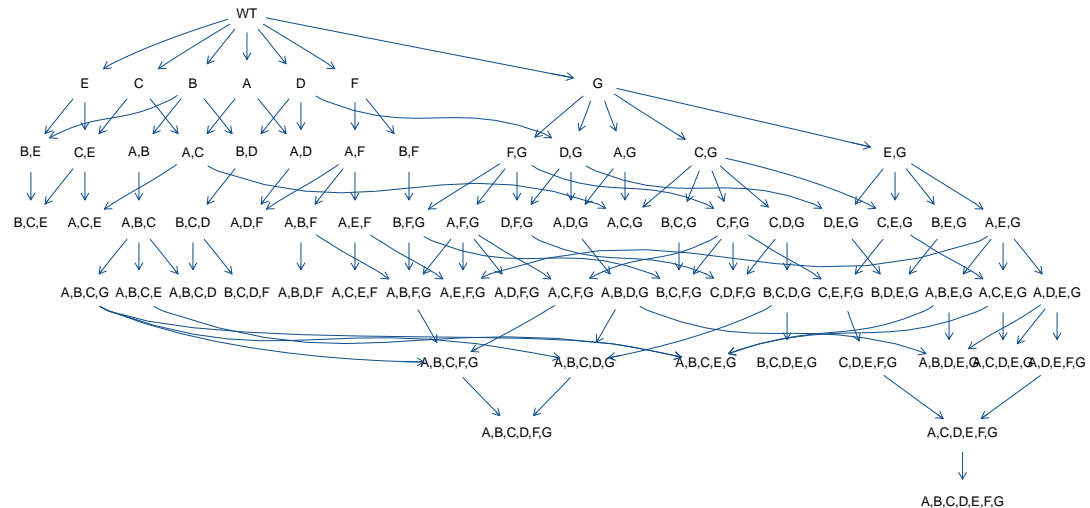

*ID* AdIPqP6mnr9aElyf  
*acc genotypes* 19  
*peaks no back* 8  
*removed edges* NA  
*prop rem edges* NA

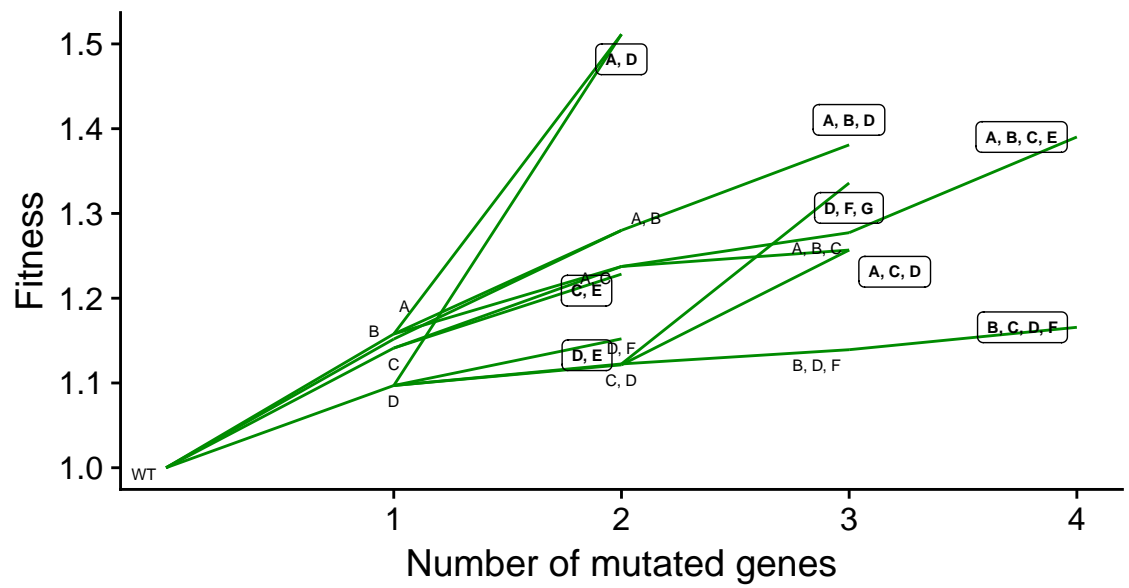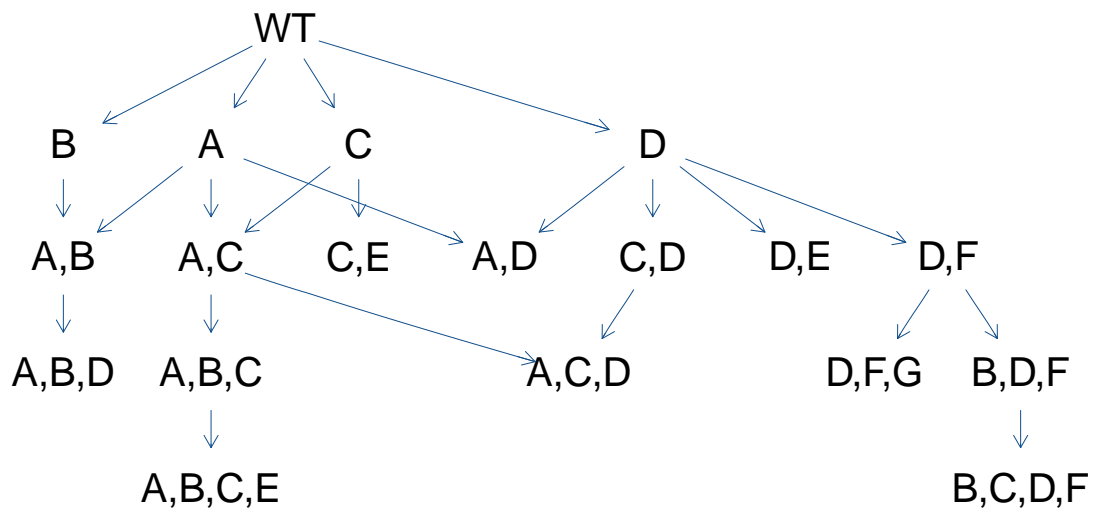

ID aeQvEQMAOMIDD5Ee  
 acc genotypes 49  
 peaks no back 20  
 removed edges NA  
 prop rem edges NA

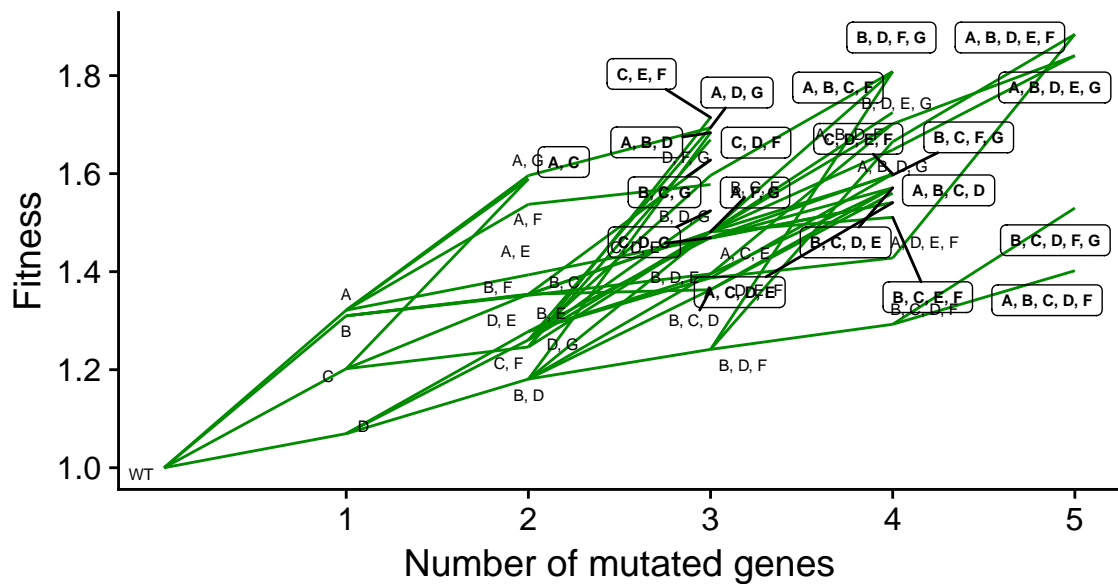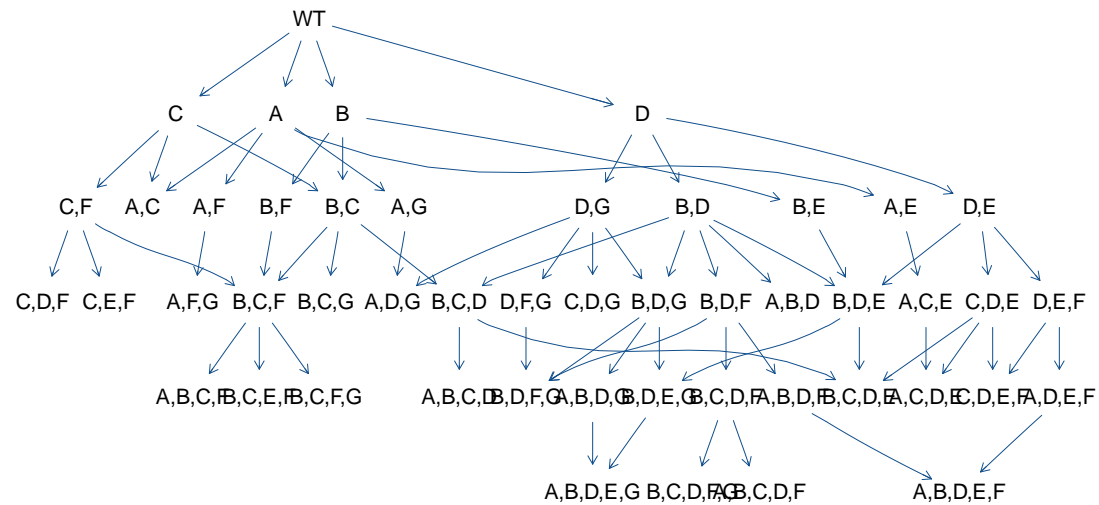

ID **AqnbiWCAFM6eogfg**  
 acc genotypes **17**  
 peaks no back **6**  
 removed edges **NA**  
 prop rem edges **NA**

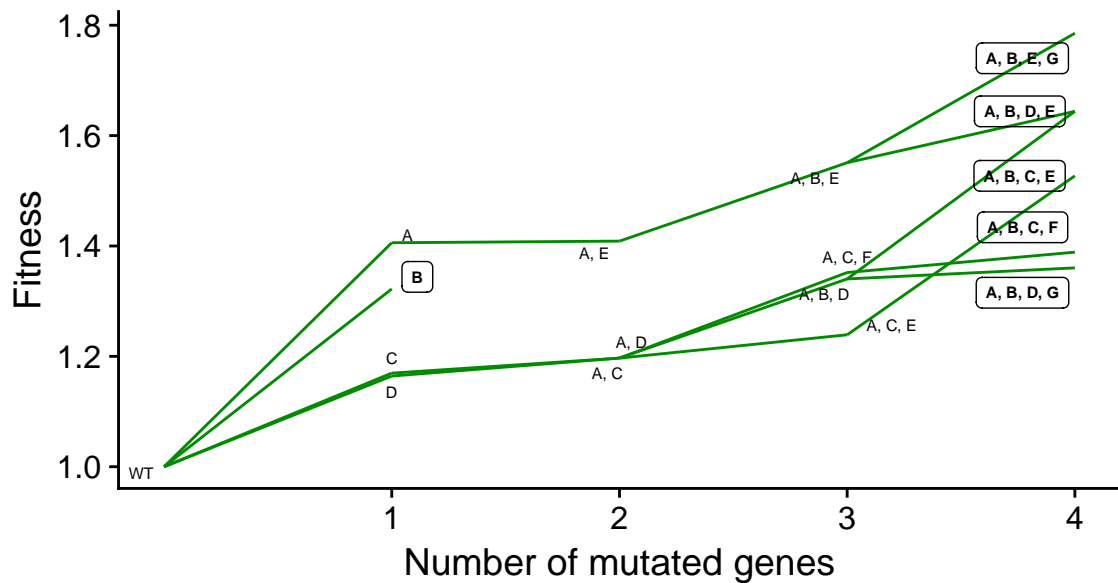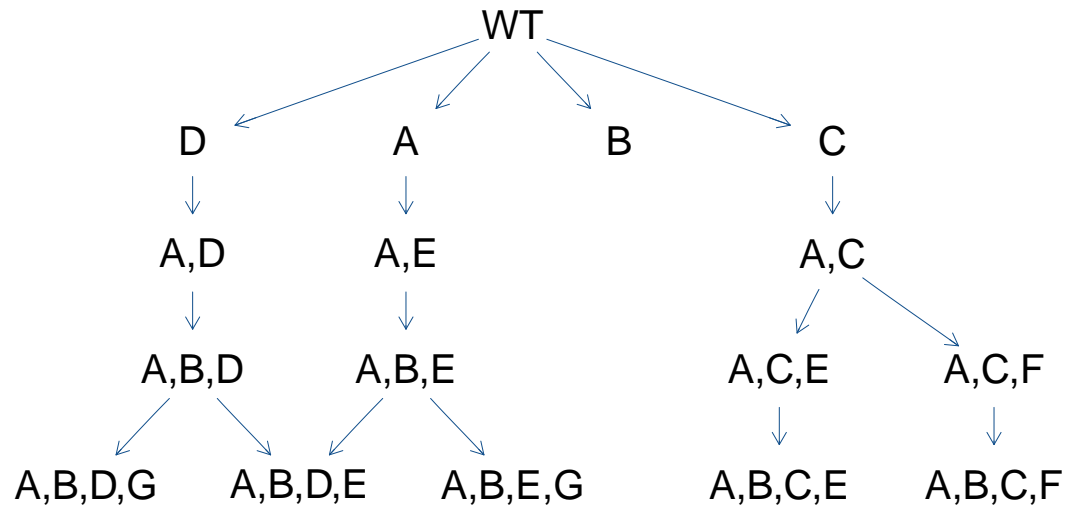







ID AyannCS2nwfQ2TDc  
 acc genotypes 25  
 peaks no back 9  
 removed edges NA  
 prop rem edges NA

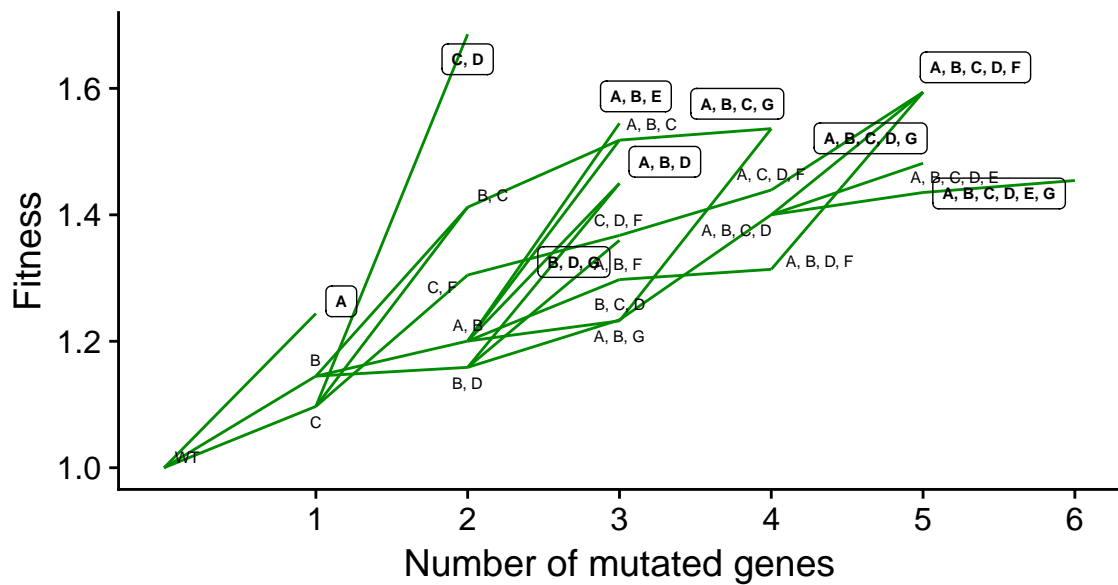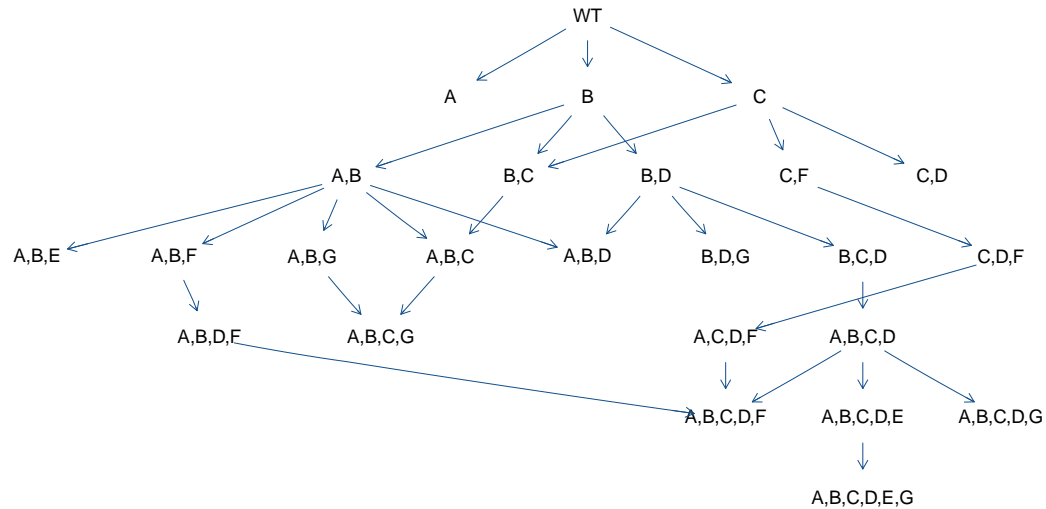

ID aZQI57105TWpukXI1  
 acc genotypes 22  
 peaks no back 10  
 removed edges NA  
 prop rem edges NA

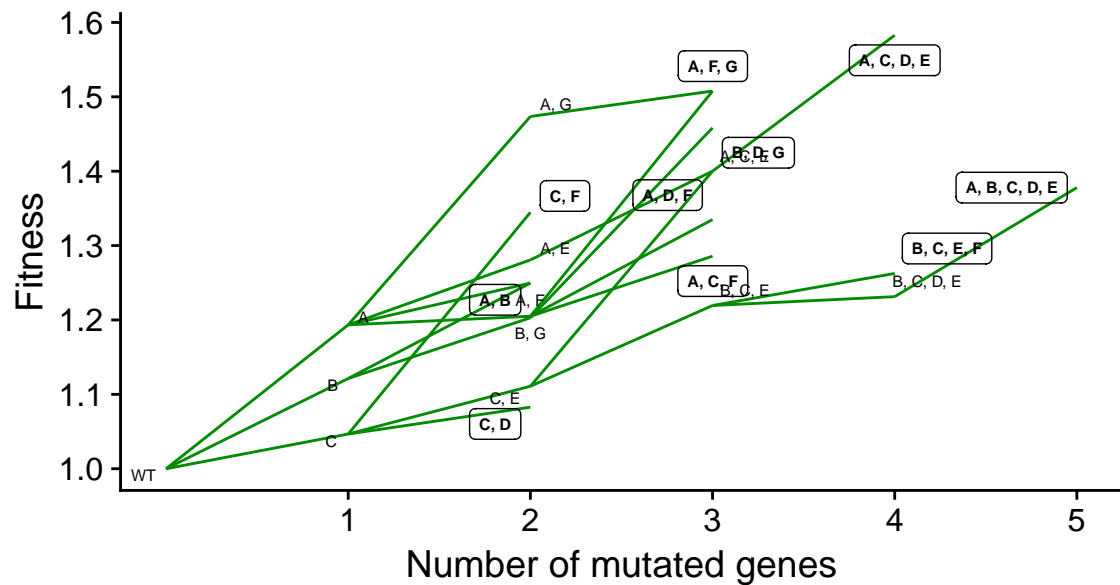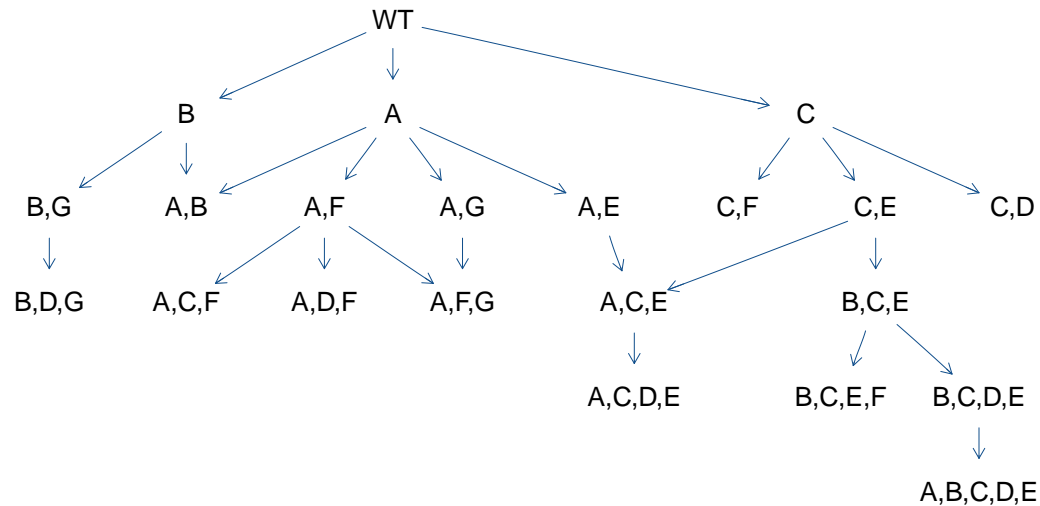

ID **BD3duuYOmGuZZNVr**  
 acc genotypes **14**  
 peaks no back **6**  
 removed edges **NA**  
 prop rem edges **NA**

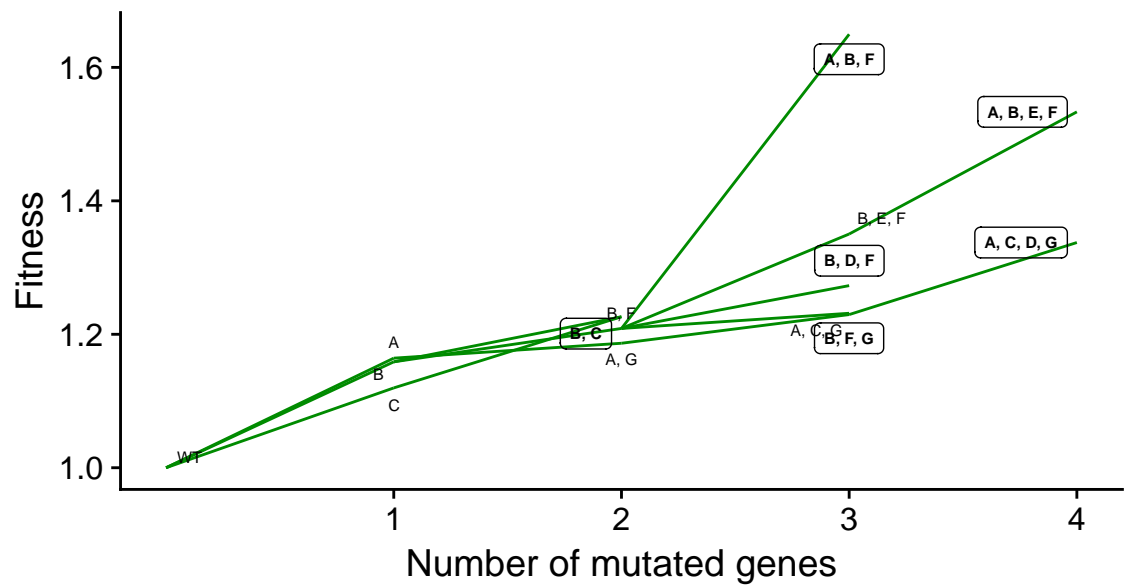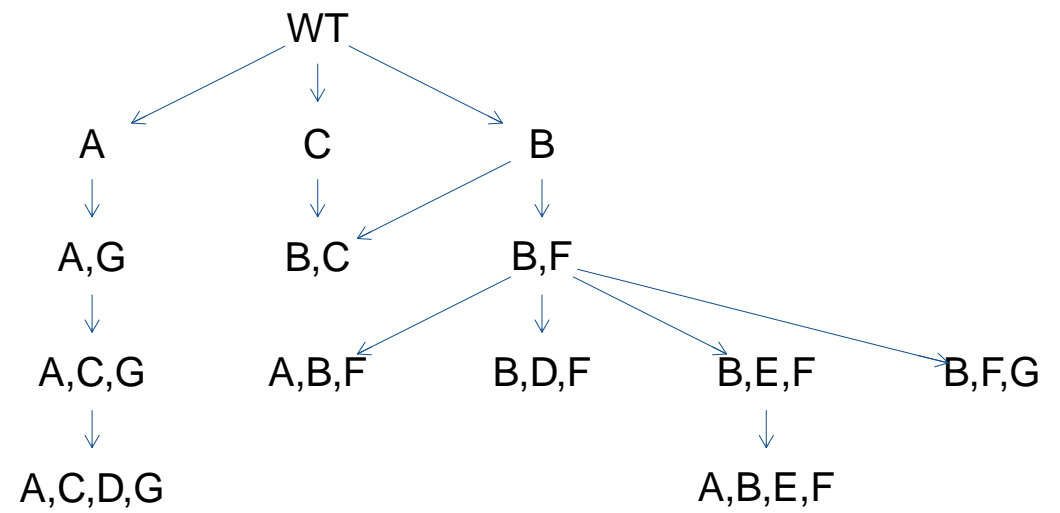

ID BfGQkzq8zBGWdITj  
 acc genotypes 18  
 peaks no back 7  
 removed edges NA  
 prop rem edges NA

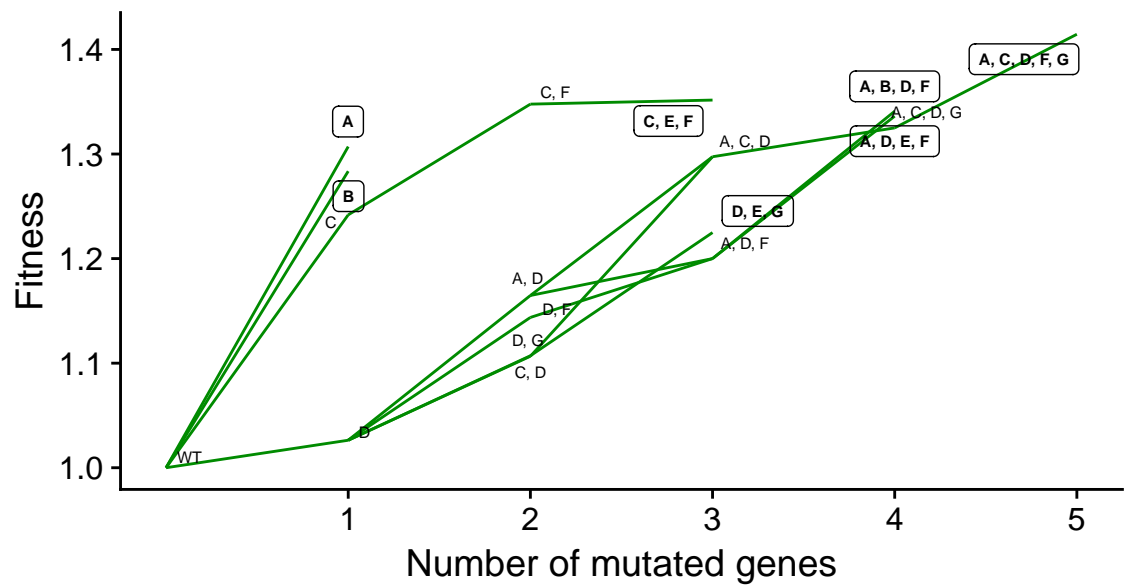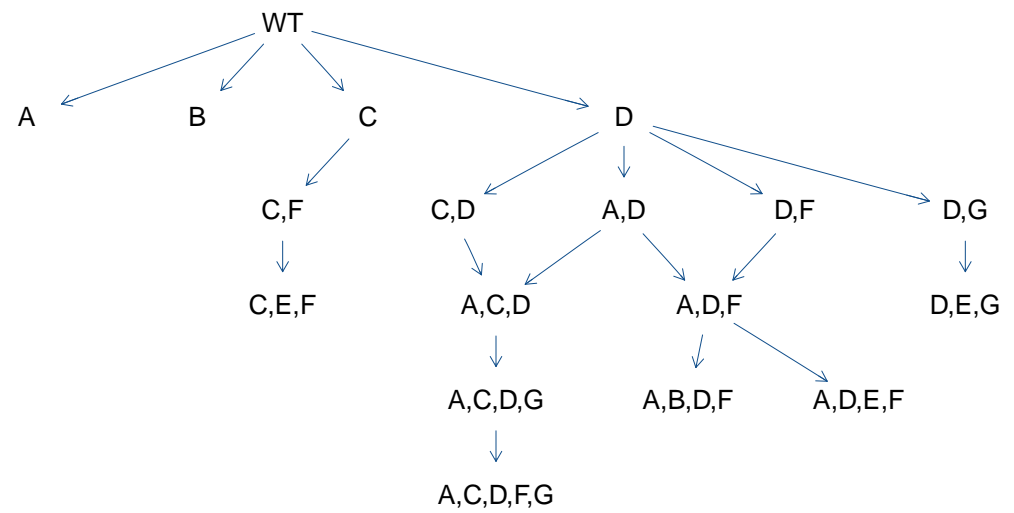

ID [bIGKwHhjkye10mnvq](#)  
 acc genotypes **85**  
 peaks no back 10  
 removed edges NA  
 prop rem edges NA

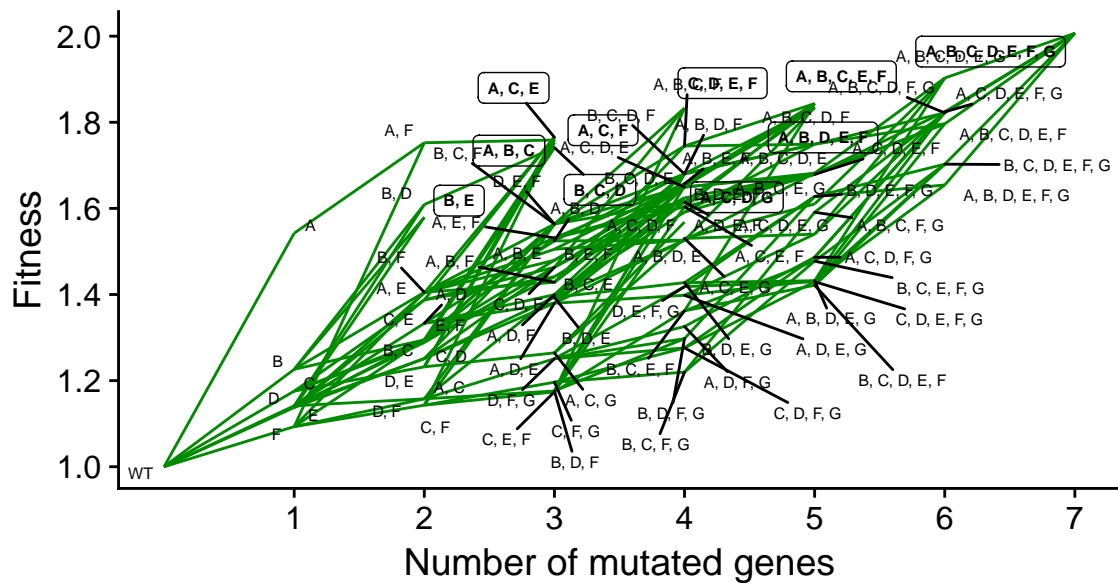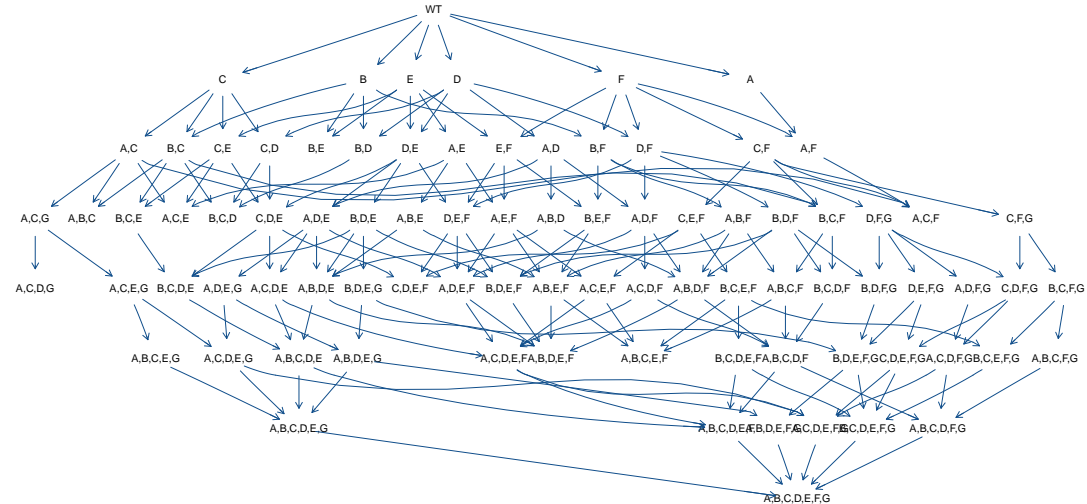

ID **bpM86wHSqemVZQ1G**  
 acc genotypes **57**  
 peaks no back **18**  
 removed edges **NA**  
 prop rem edges **NA**

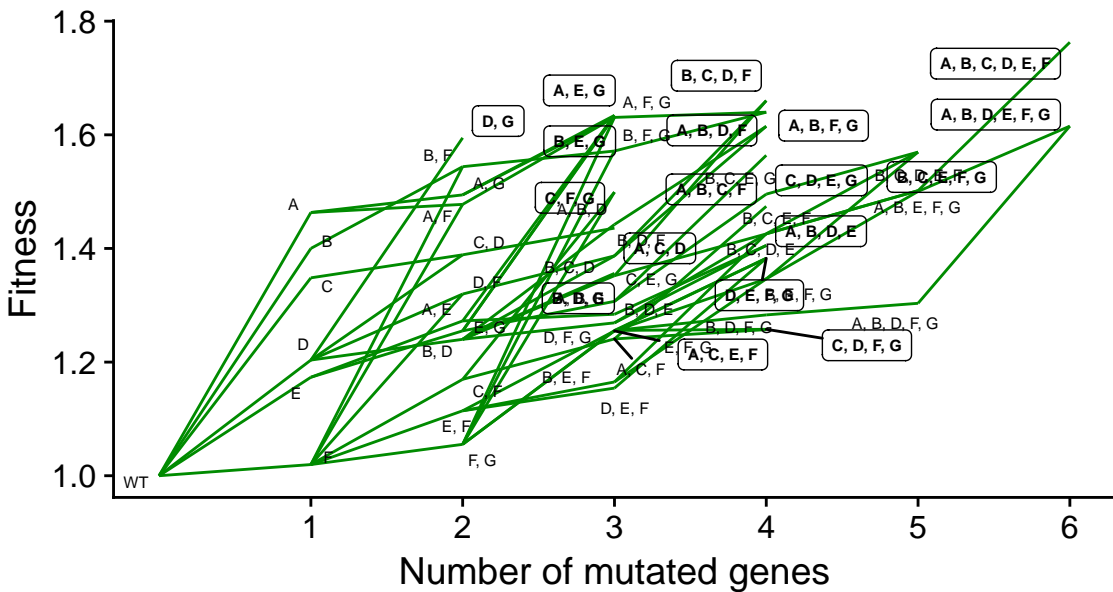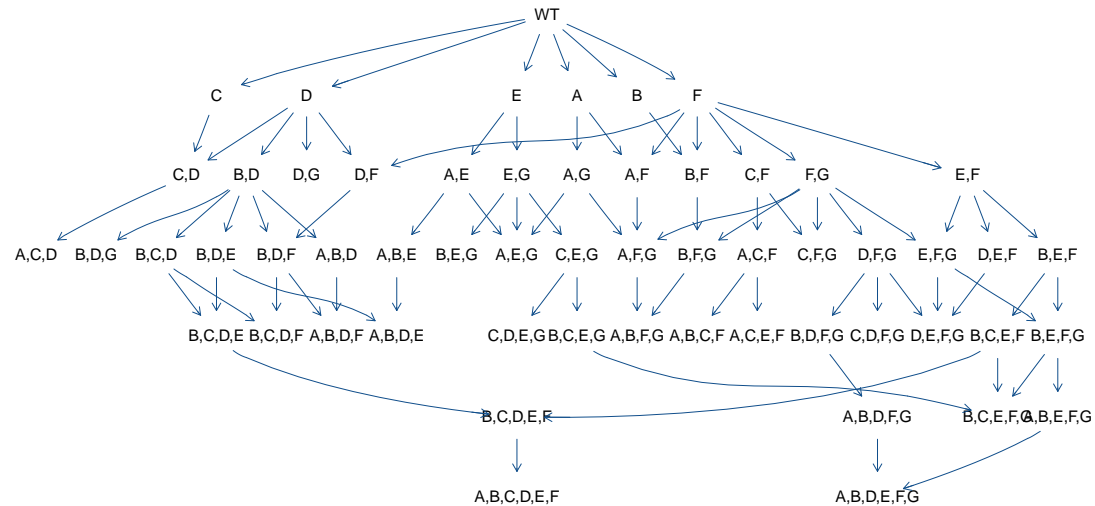

*ID* BTJyOApuNPFWEpsU  
*acc genotypes* 17  
*peaks no back* 11  
*removed edges* NA  
*prop rem edges* NA

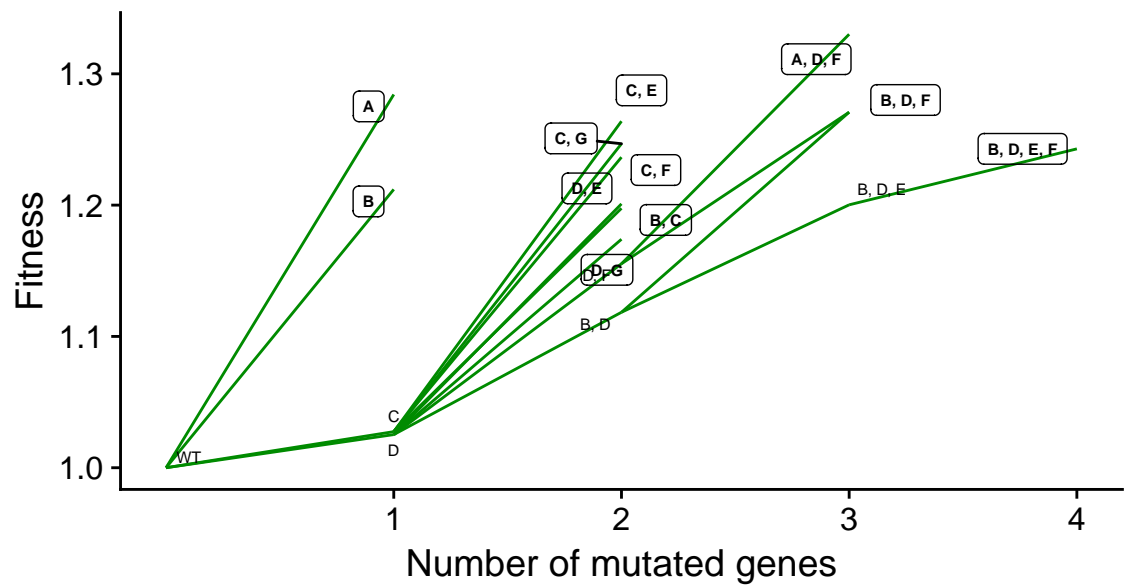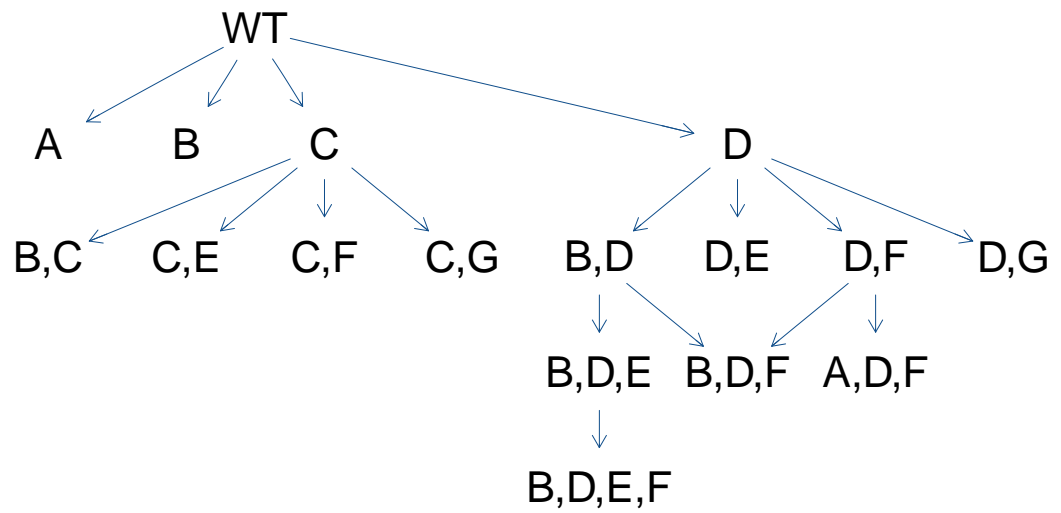



ID BxBVJz10wDpOmersD  
 acc genotypes 90  
 peaks no back 21  
 removed edges NA  
 prop rem edges NA

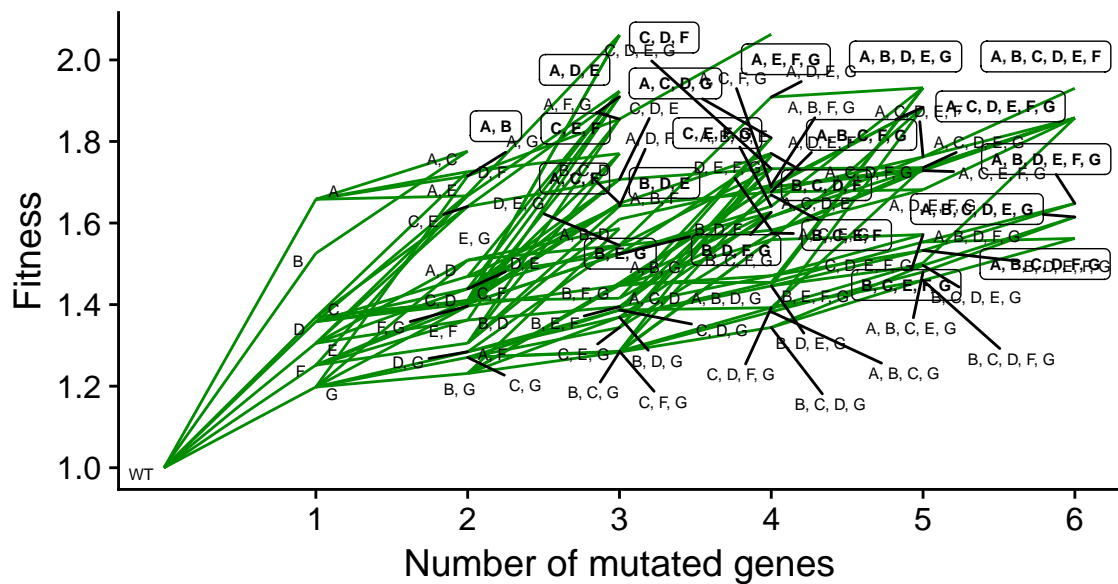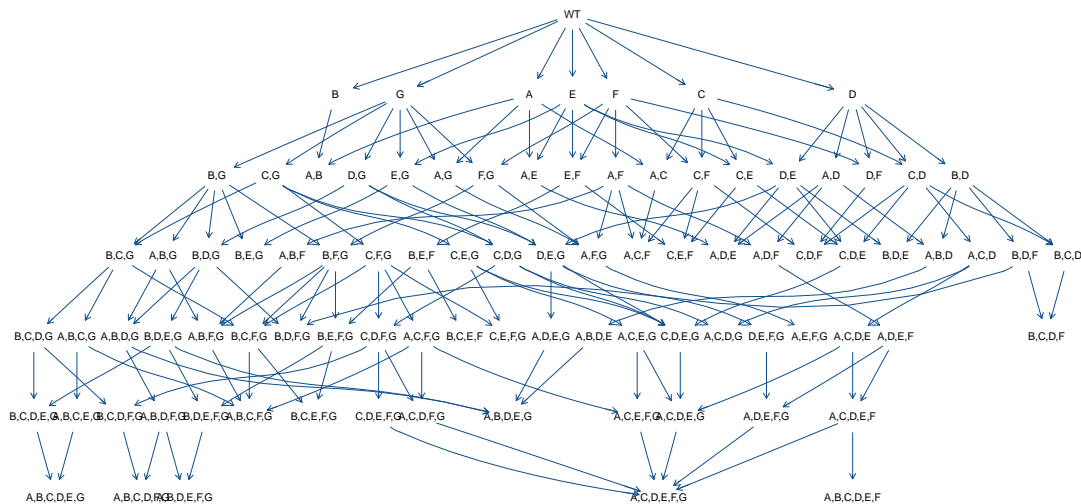

ID c42Quu4ADM6baevo  
 acc genotypes 60  
 peaks no back 14  
 removed edges NA  
 prop rem edges NA

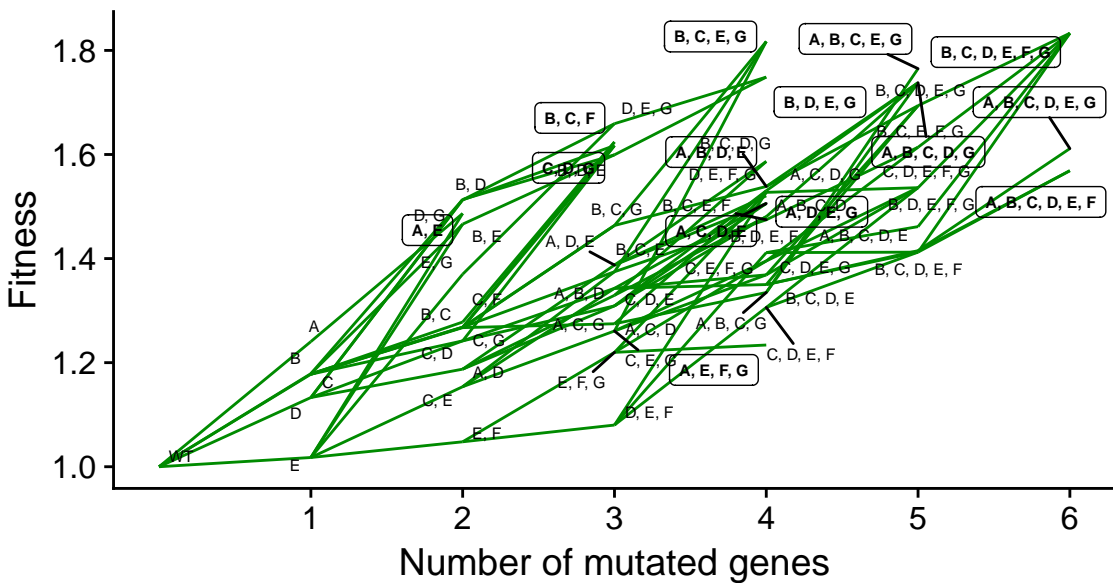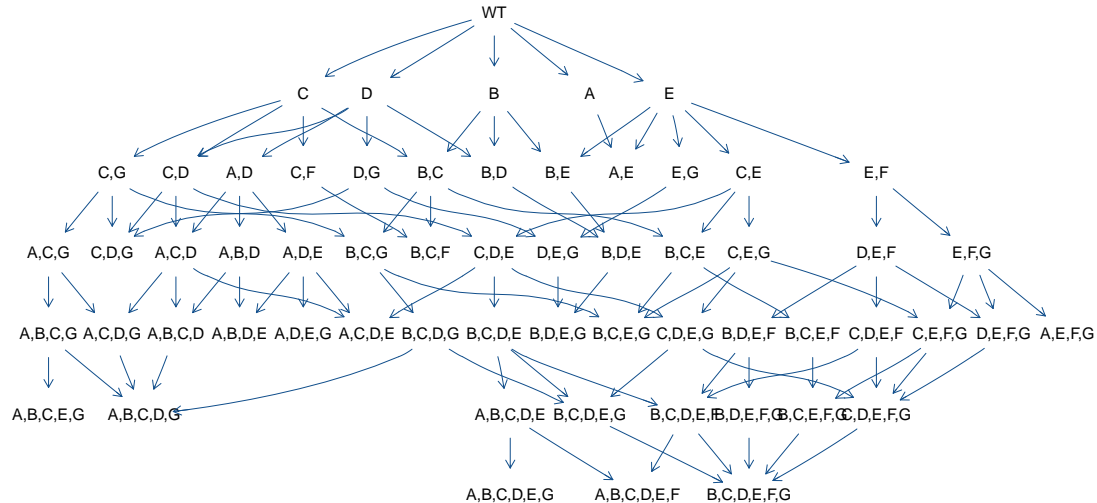

ID **c534FhXAH8kOwR3J**  
 acc genotypes **53**  
 peaks no back **24**  
 removed edges **NA**  
 prop rem edges **NA**

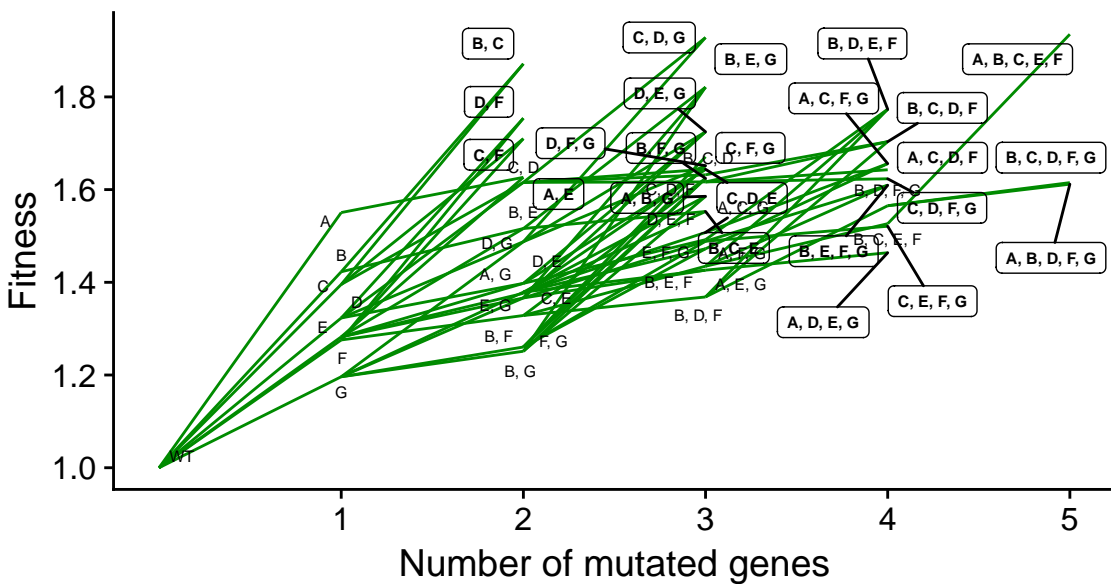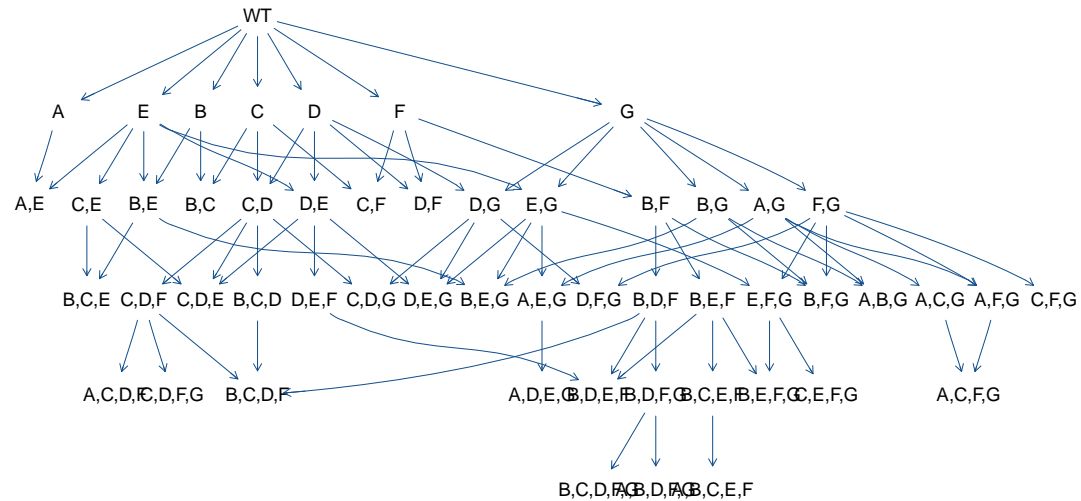

ID CfrC3ZAnJWi3s9E3  
 acc genotypes 38  
 peaks no back 15  
 removed edges NA  
 prop rem edges NA

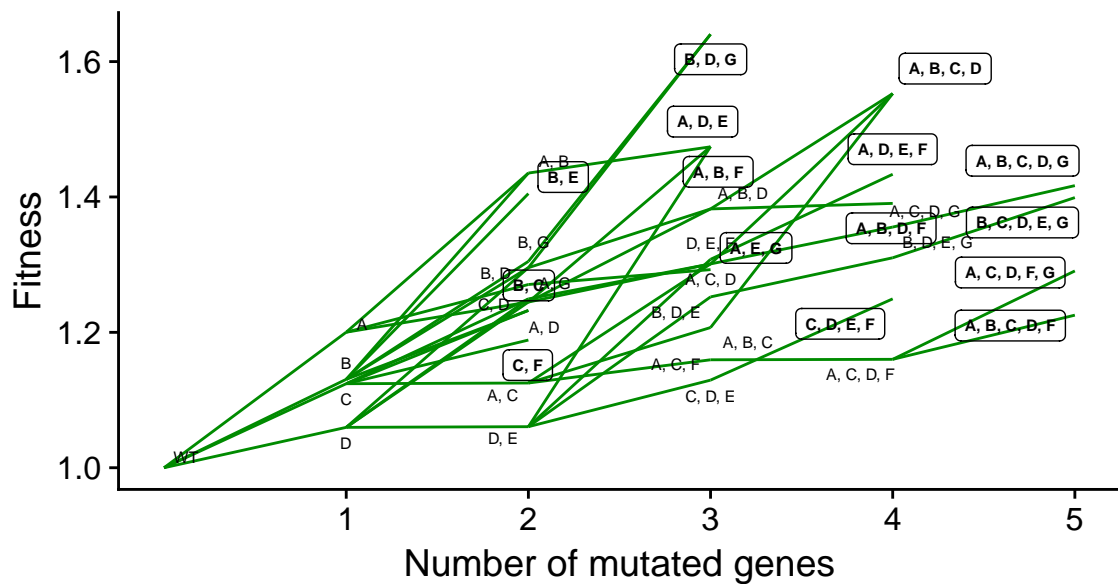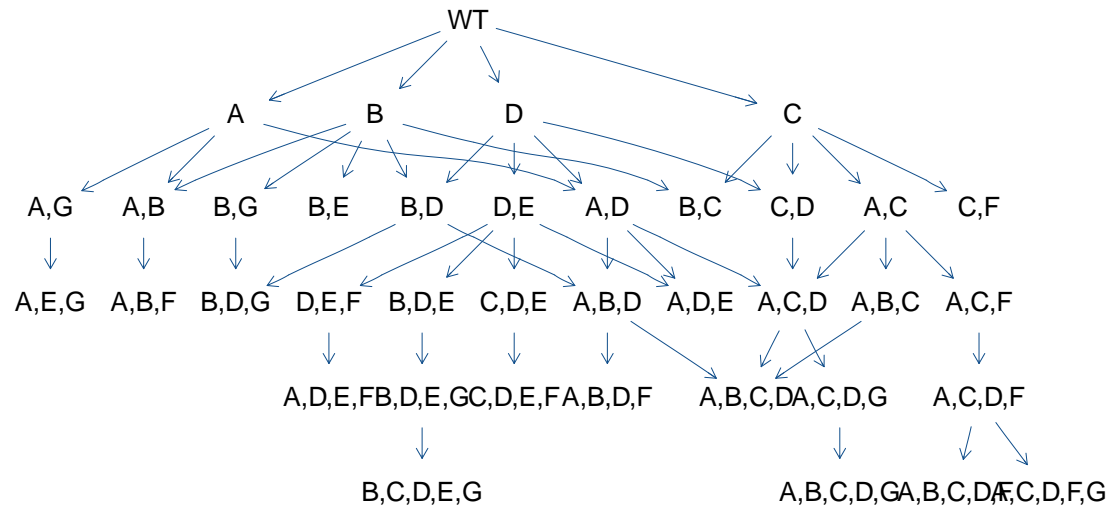



ID [cl8oWQEqqPY7cX2o](#)  
 acc genotypes 22  
 peaks no back 13  
 removed edges NA  
 prop rem edges NA

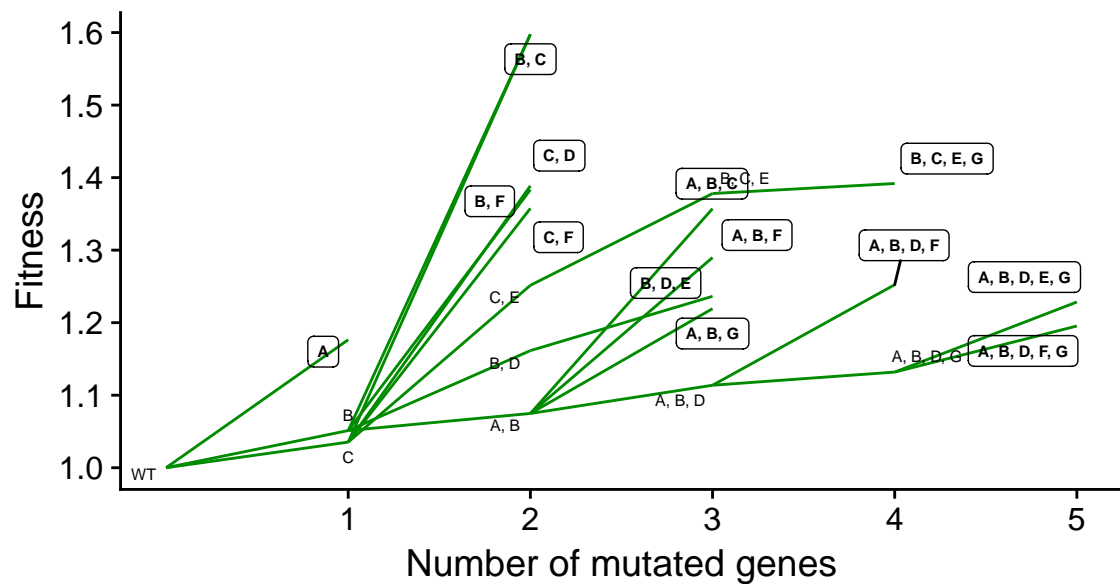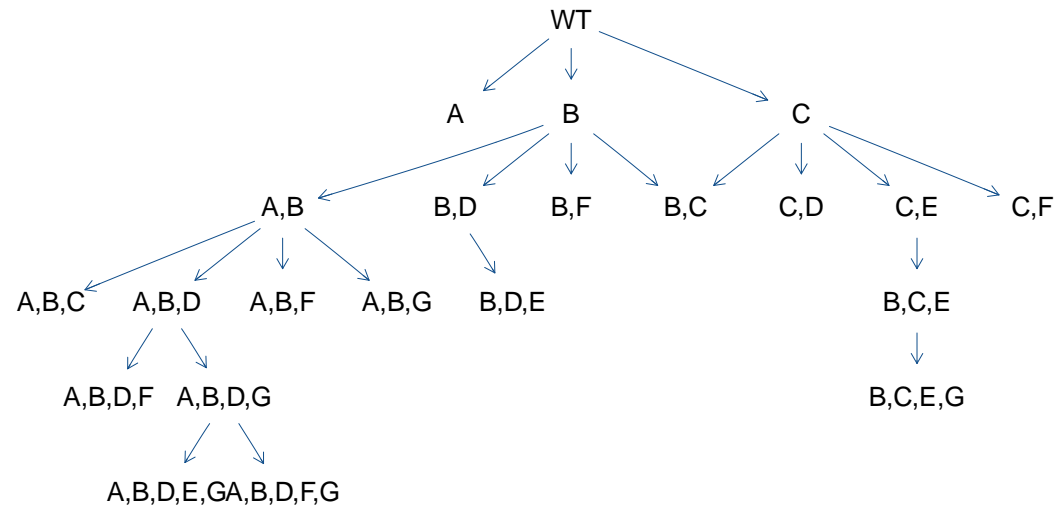

ID CjzXJbJTcl5BNmE1  
 acc genotypes 74  
 peaks no back 21  
 removed edges NA  
 prop rem edges NA

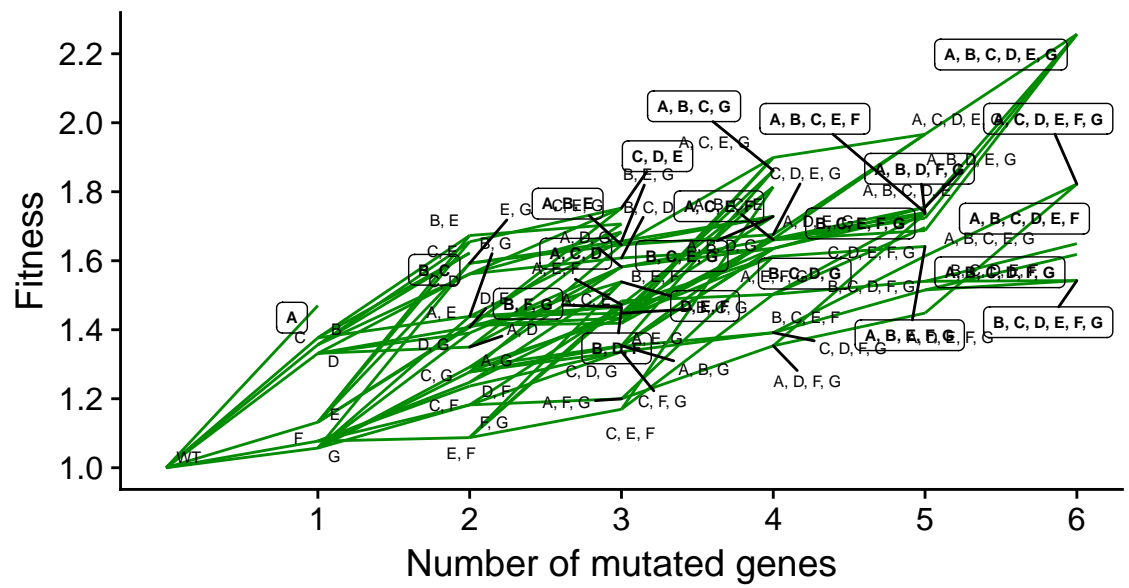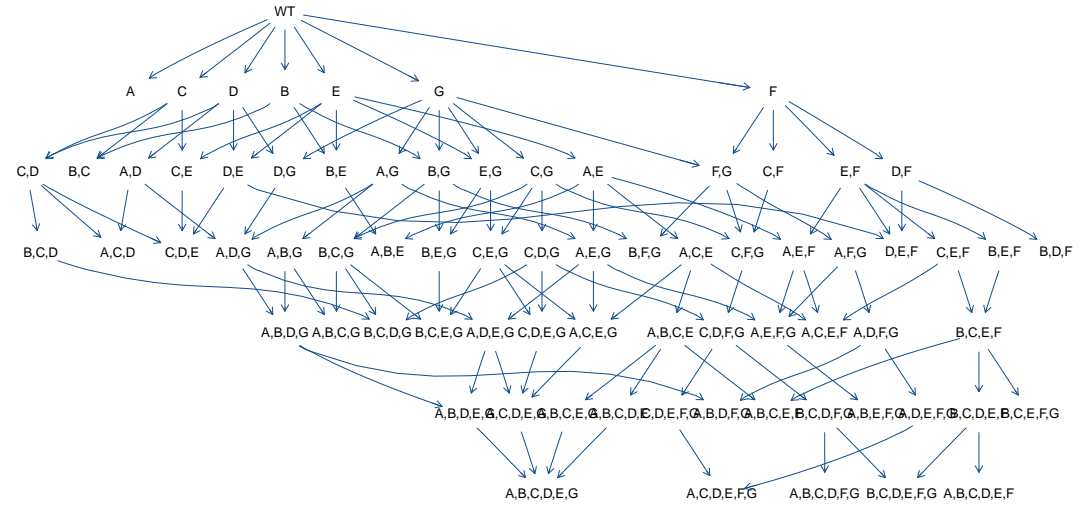

ID Ck1zf9wAa7Dm9QHw  
 acc genotypes 24  
 peaks no back 9  
 removed edges NA  
 prop rem edges NA

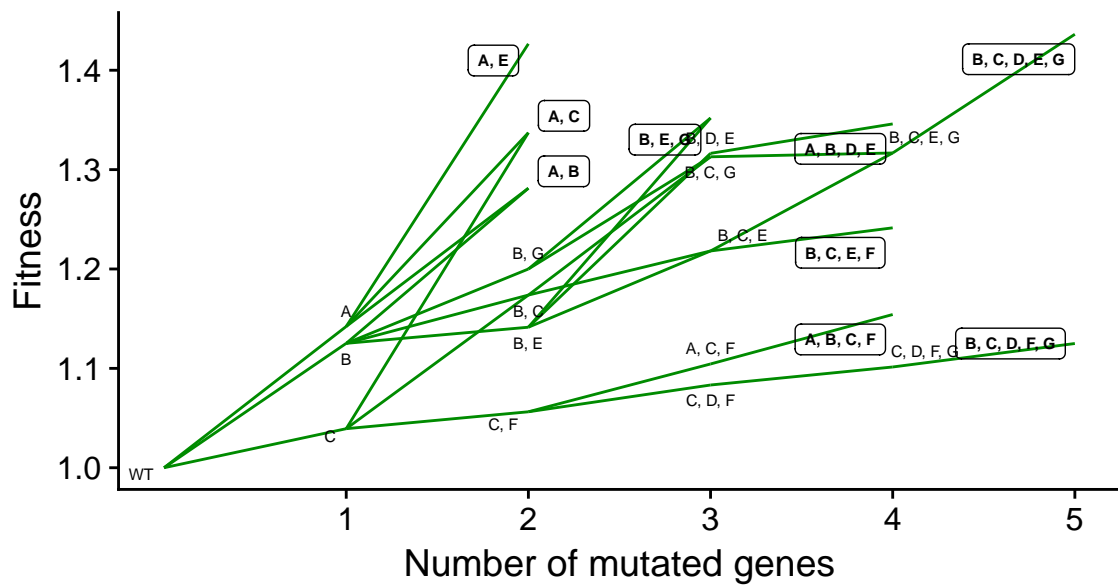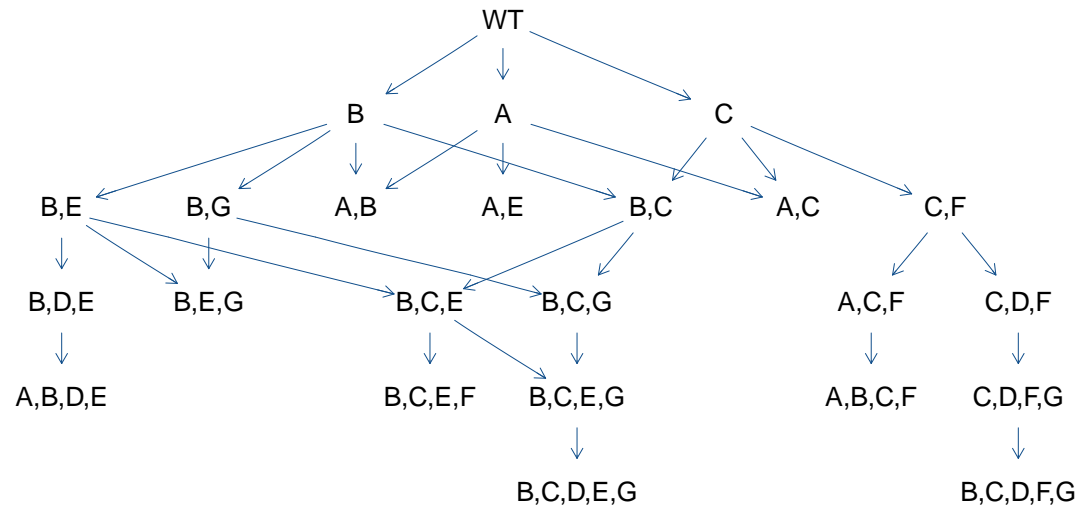



ID CsQcK5oitWE3VWiq  
 acc genotypes 90  
 peaks no back 25  
 removed edges NA  
 prop rem edges NA

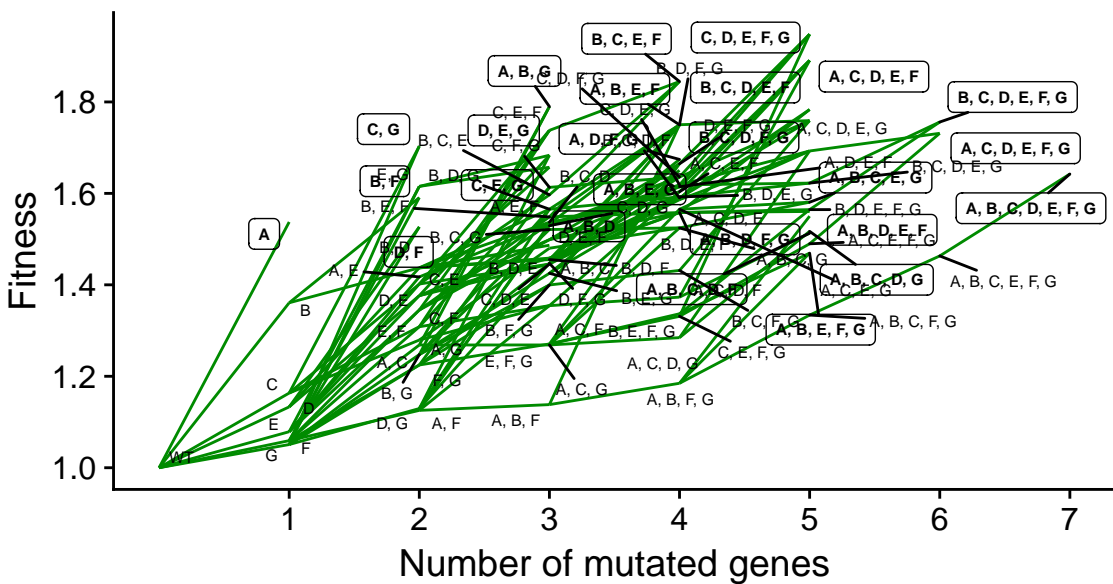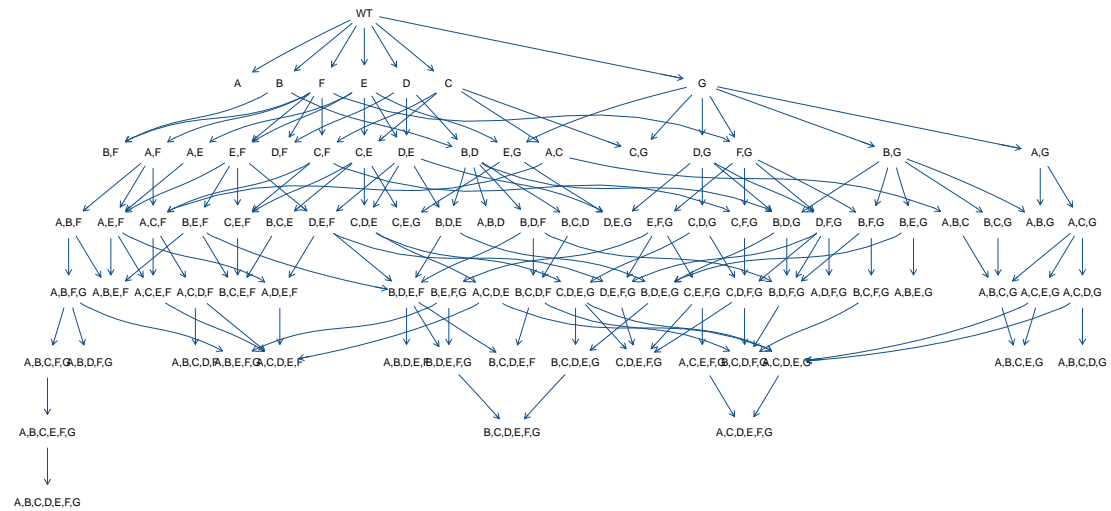



ID CvnM3L5EYGnoEGpc  
 acc genotypes 44  
 peaks no back 19  
 removed edges NA  
 prop rem edges NA

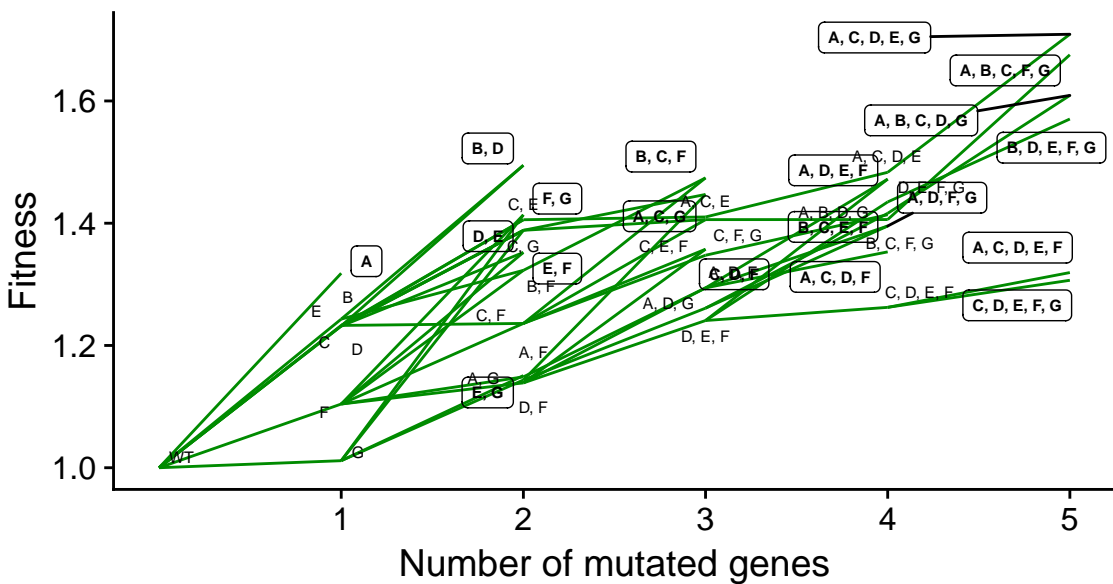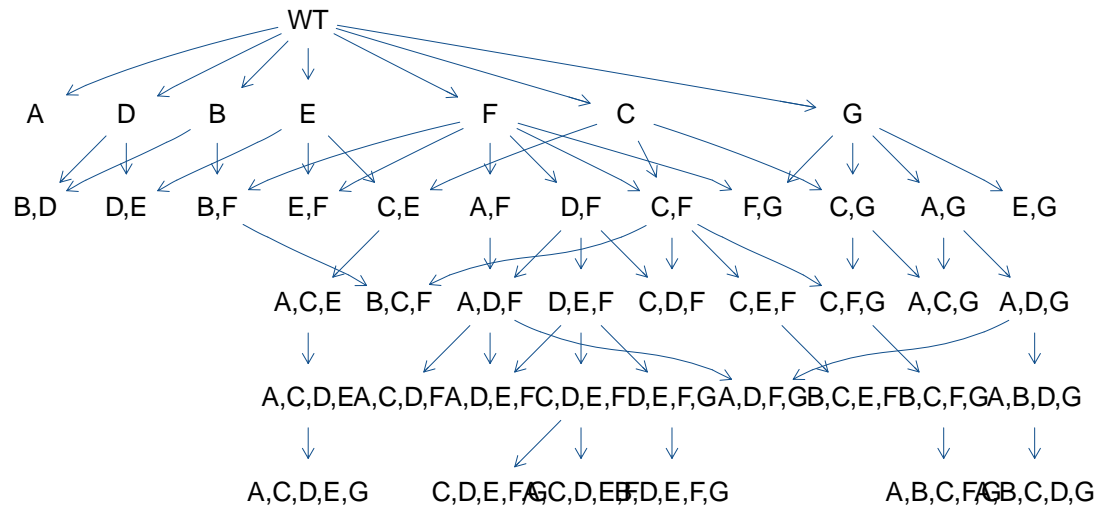

ID D8vky9fRuaEmBWIV  
 acc genotypes 45  
 peaks no back 16  
 removed edges NA  
 prop rem edges NA

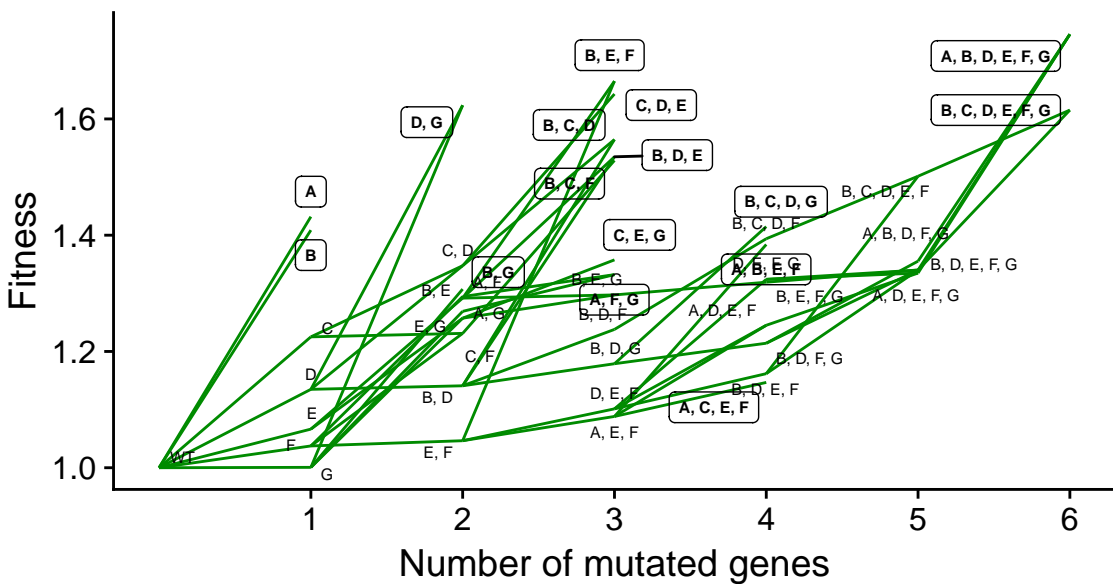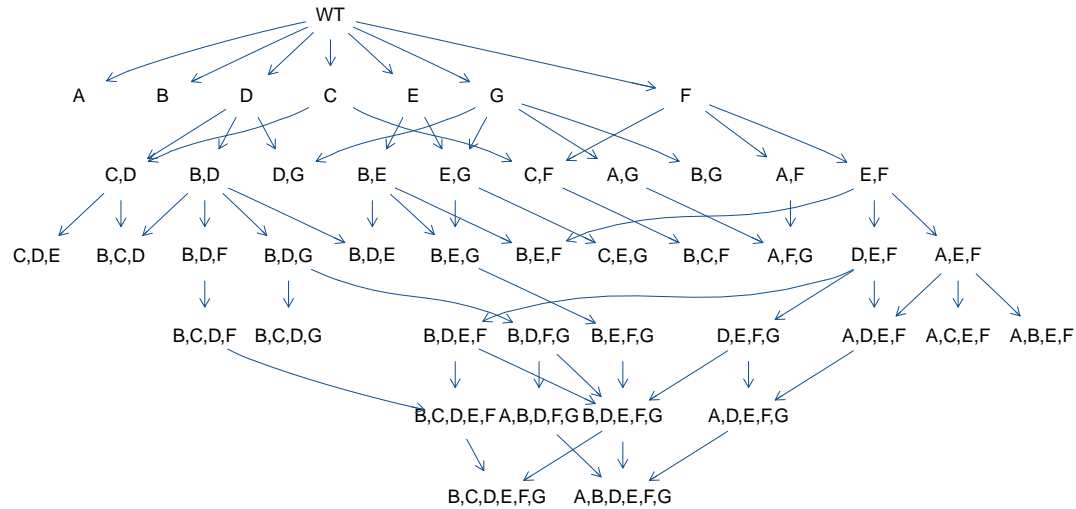

ID Daq9vjIG10xrsjP23  
 acc genotypes 22  
 peaks no back 13  
 removed edges NA  
 prop rem edges NA

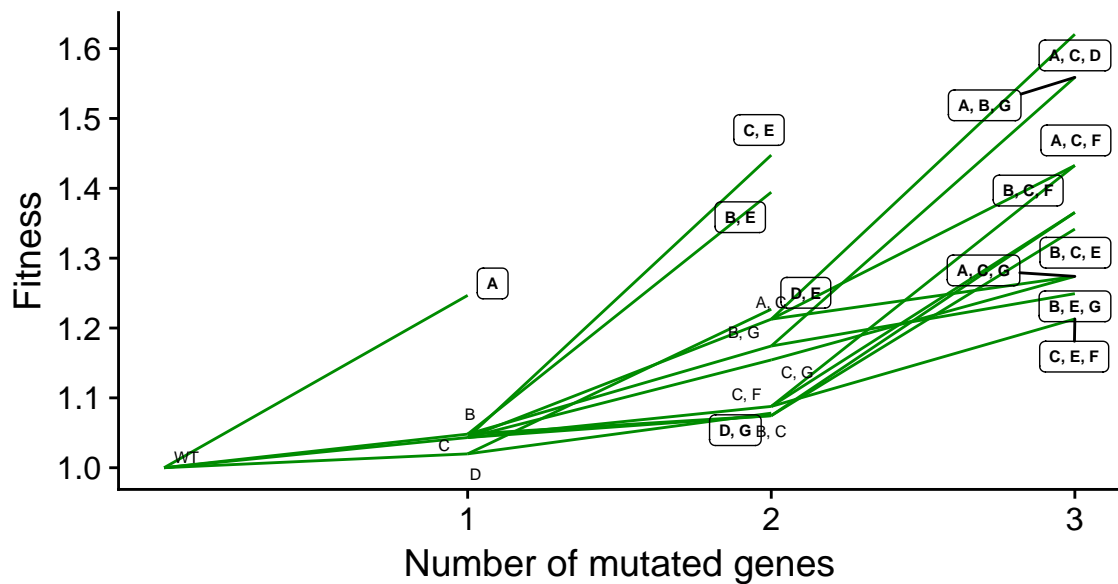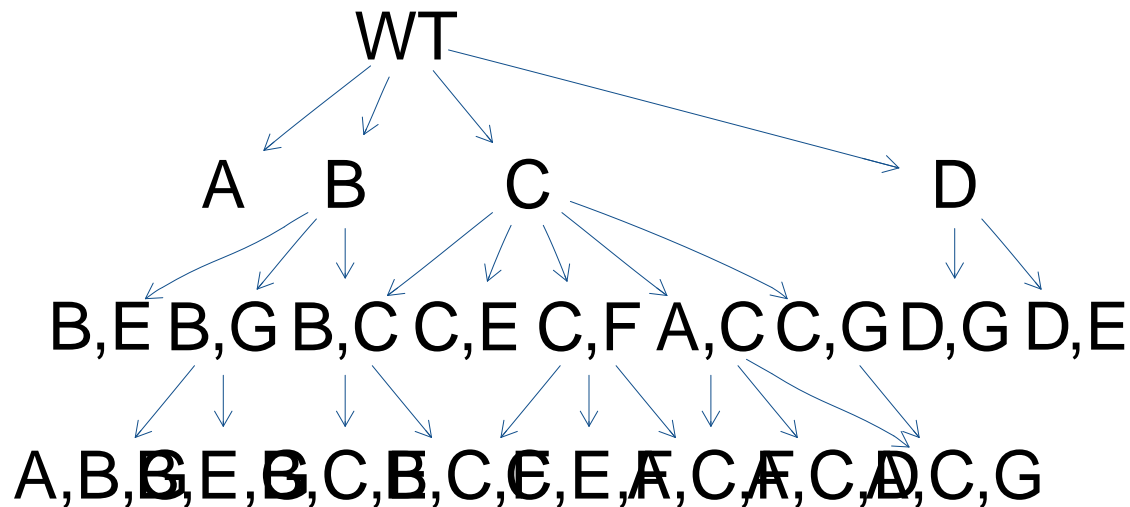

ID deoj10TADCLDLOA5o  
 acc genotypes 30  
 peaks no back 8  
 removed edges NA  
 prop rem edges NA

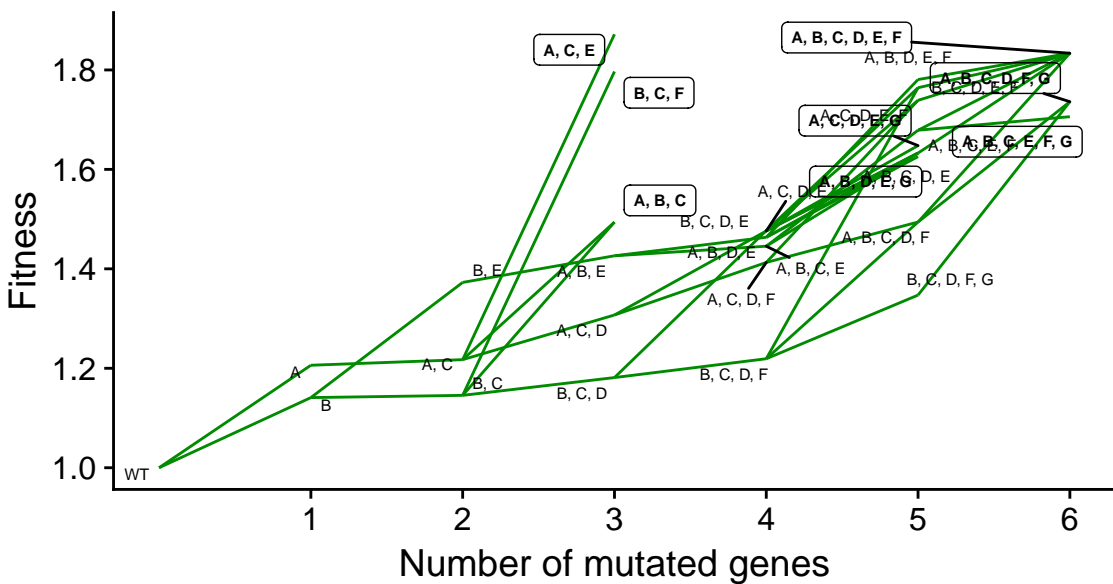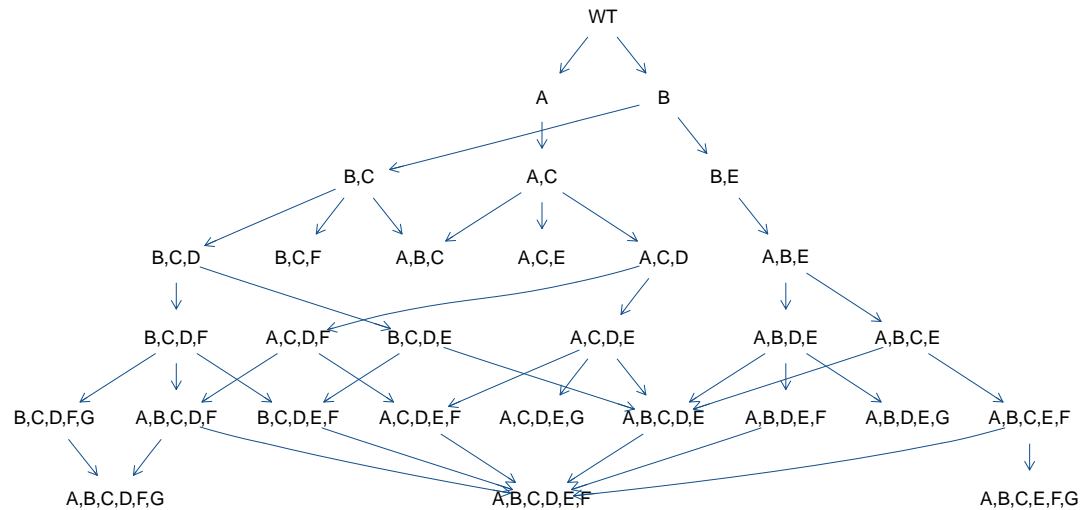



ID [duoNzOQwAe8B75y5](#)  
 acc genotypes 42  
 peaks no back 8  
 removed edges NA  
 prop rem edges NA

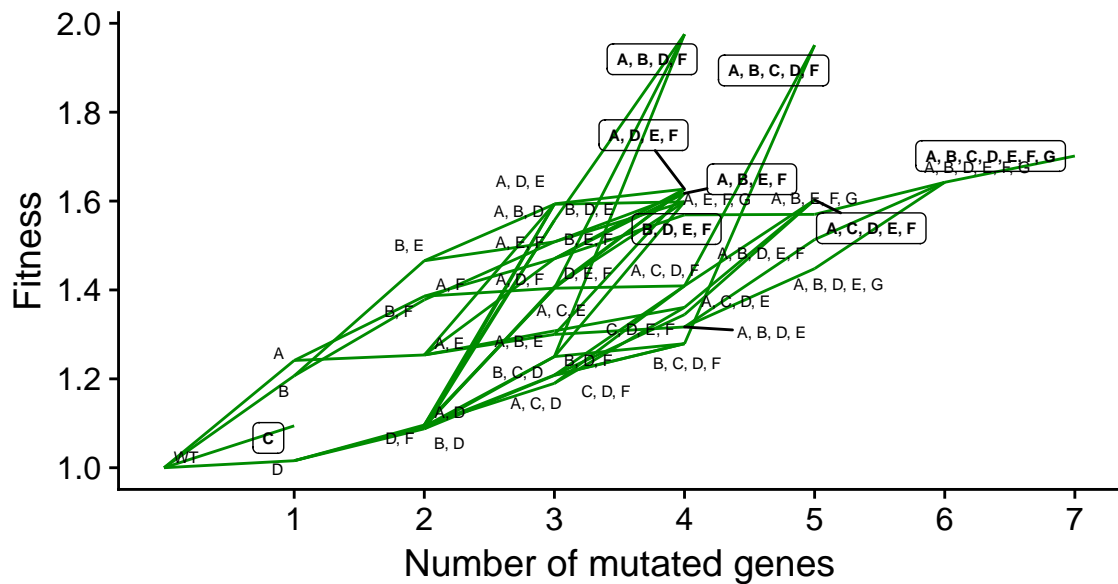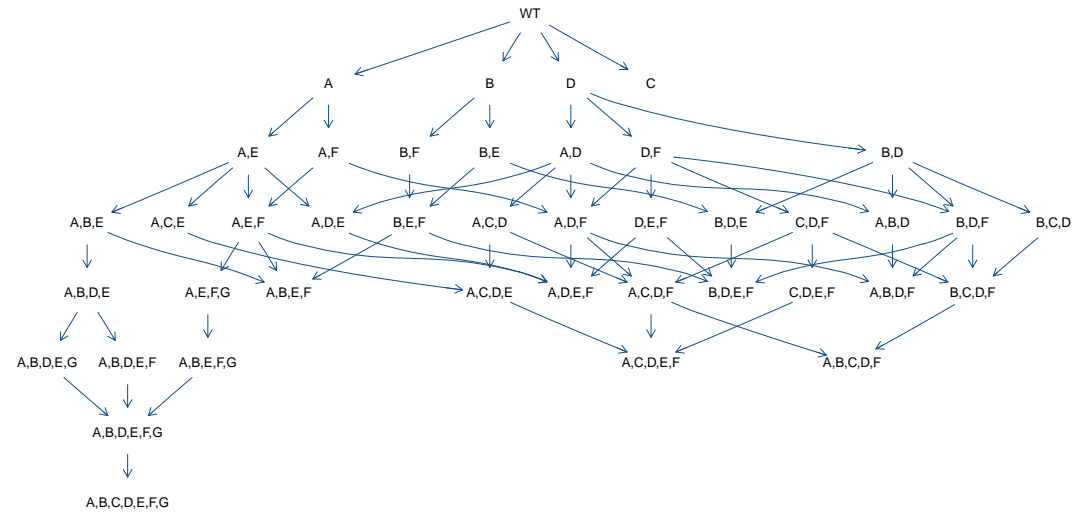



ID **Dv4AjSOSTzRnaox**  
 acc genotypes **62**  
 peaks no back **17**  
 removed edges **NA**  
 prop rem edges **NA**

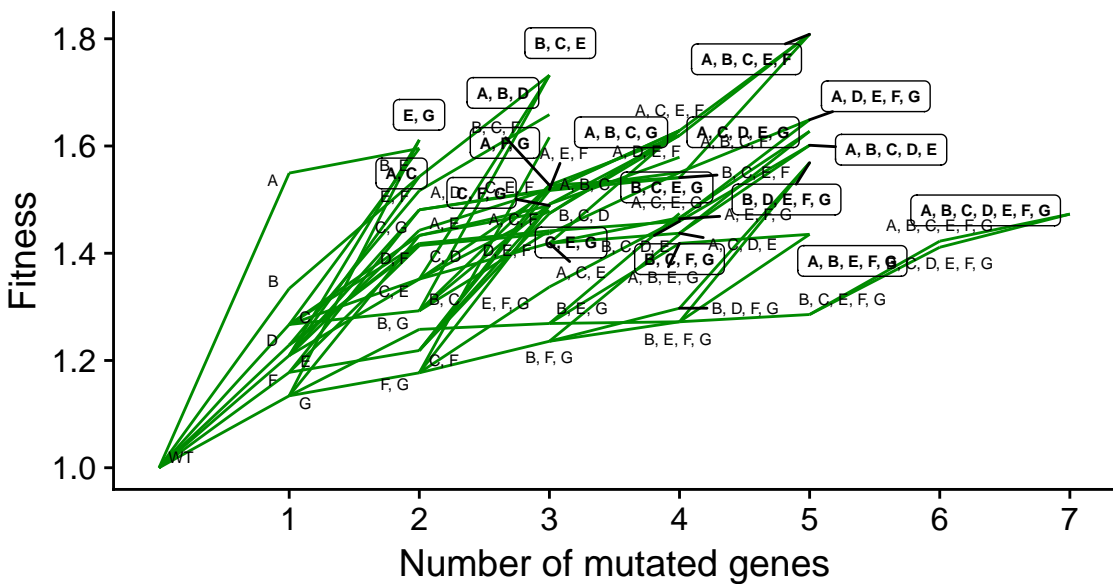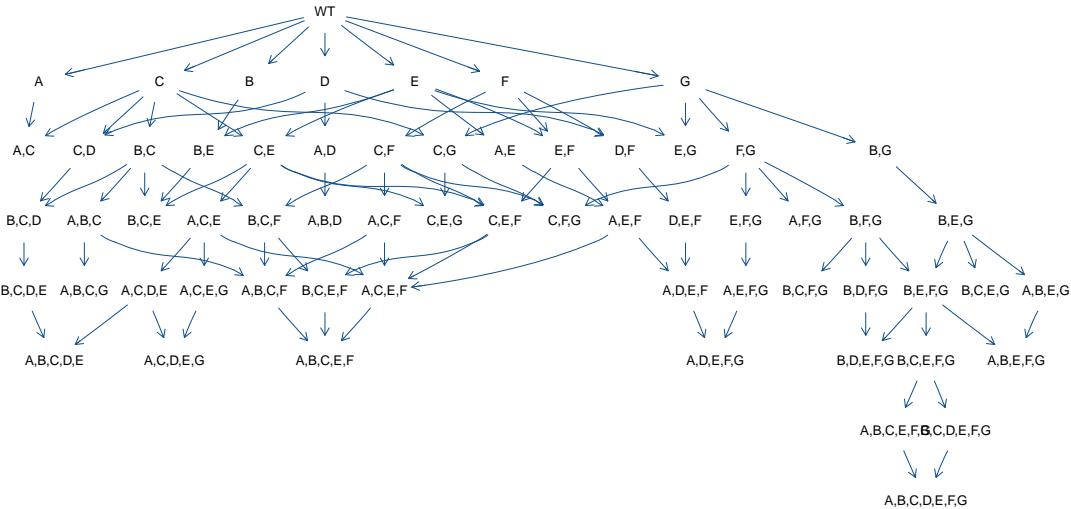



ID EAI9G10BQGPjhOaTd  
 acc genotypes 20  
 peaks no back 9  
 removed edges NA  
 prop rem edges NA

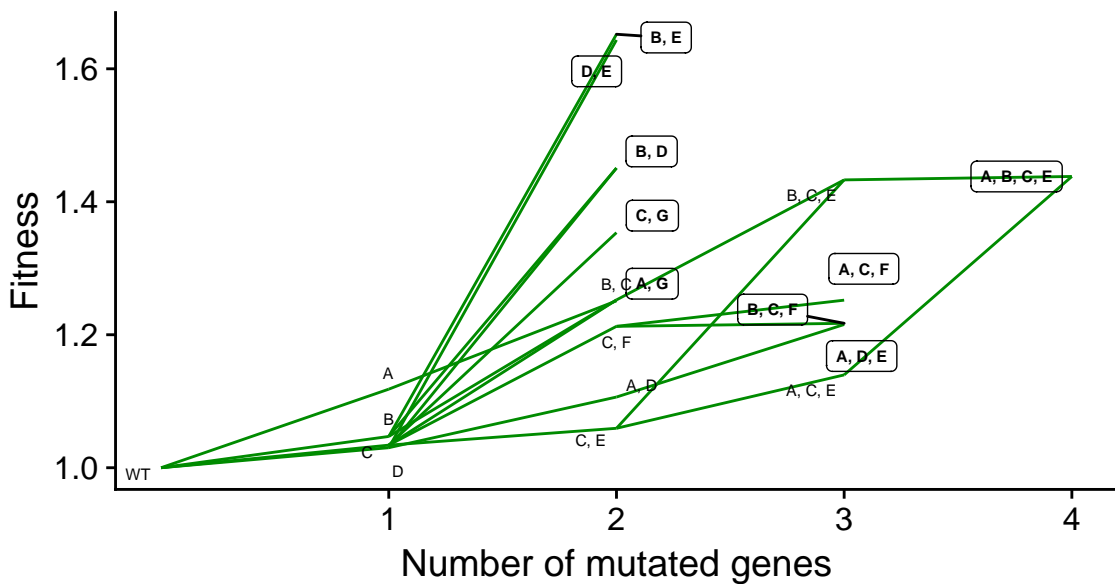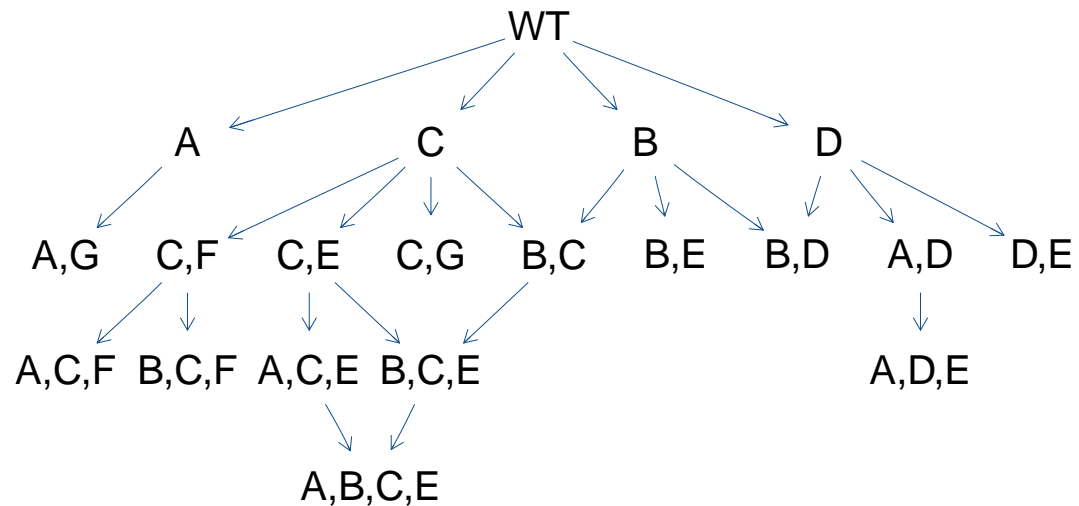

ID **eb4moeiVT2CInVLV**  
 acc genotypes **74**  
 peaks no back **28**  
 removed edges **NA**  
 prop rem edges **NA**

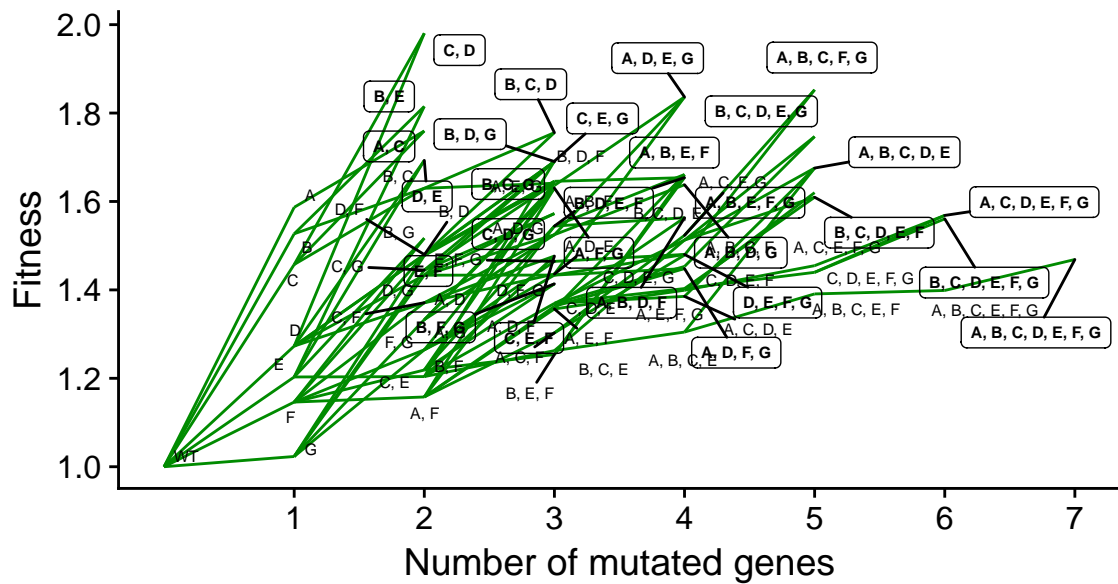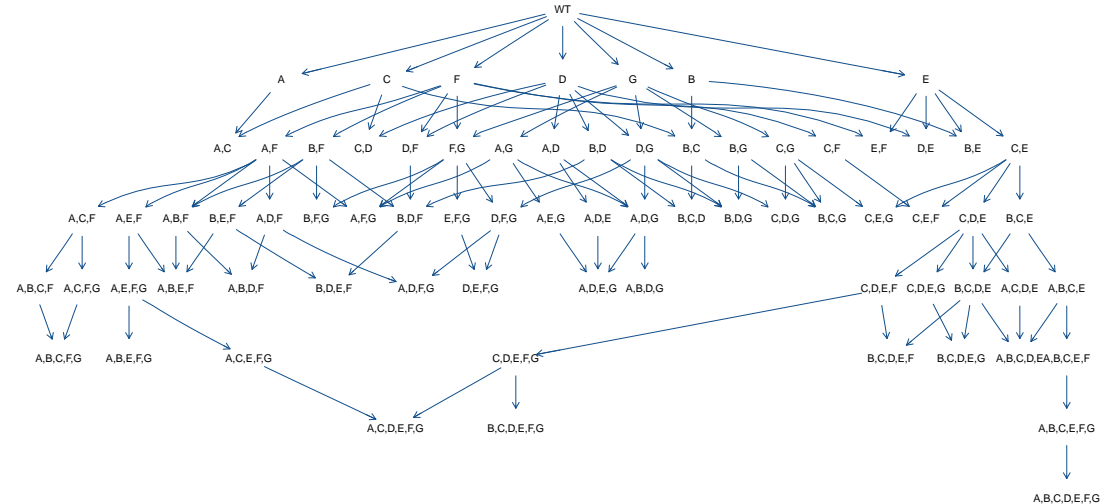



ID EKkcYkyuQzPjnUDy  
 acc genotypes 54  
 peaks no back 16  
 removed edges NA  
 prop rem edges NA

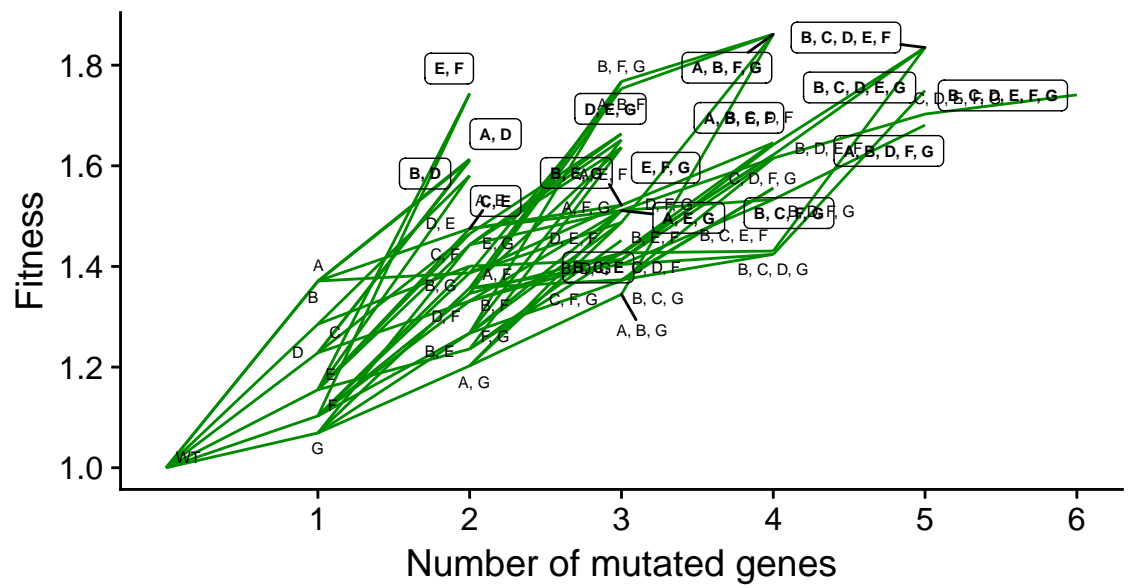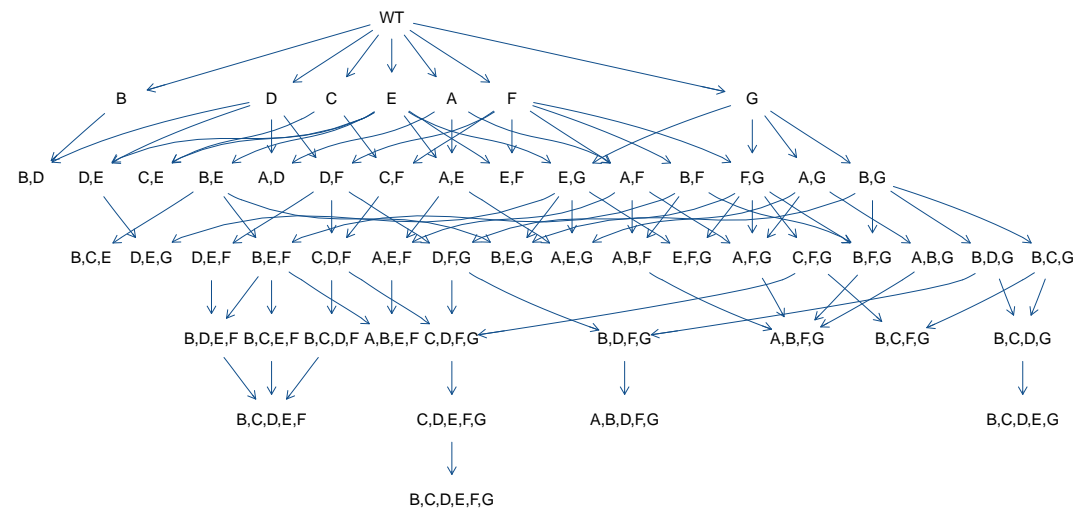

ID EM68B9s53CXWI9KL  
 acc genotypes 41  
 peaks no back 16  
 removed edges NA  
 prop rem edges NA

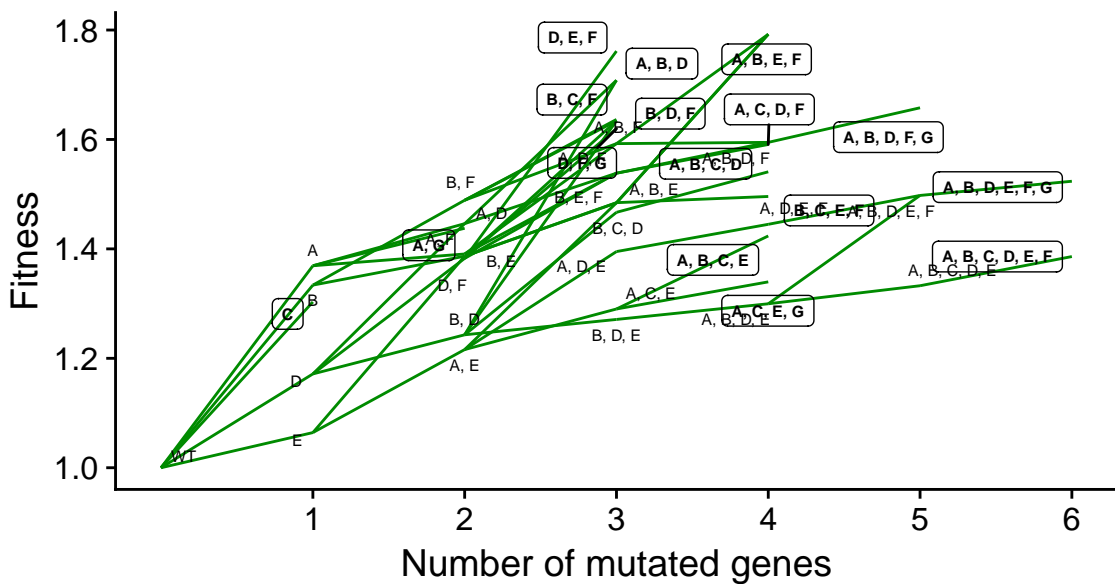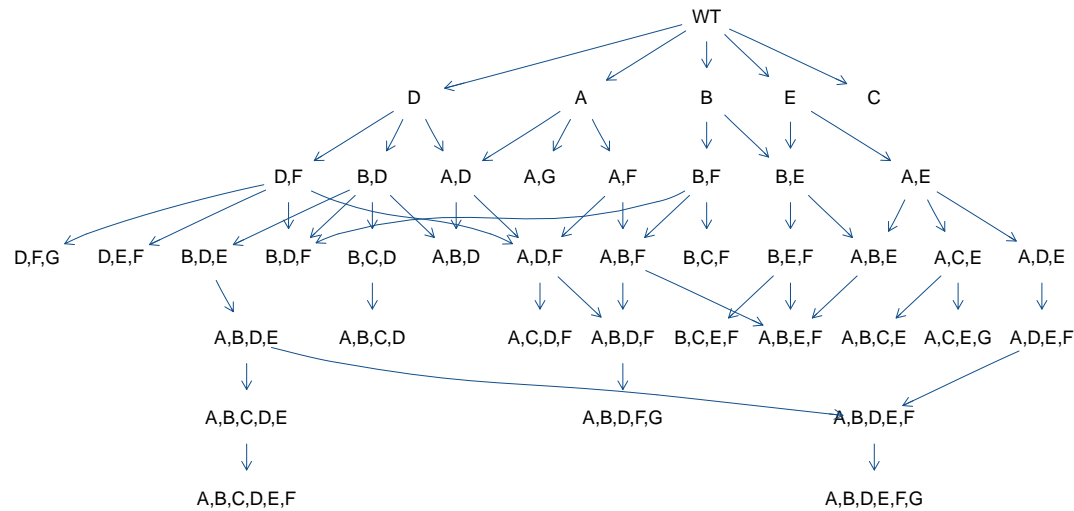

ID eQOmKNmXnLoUPYw5  
 acc genotypes 30  
 peaks no back 14  
 removed edges NA  
 prop rem edges NA

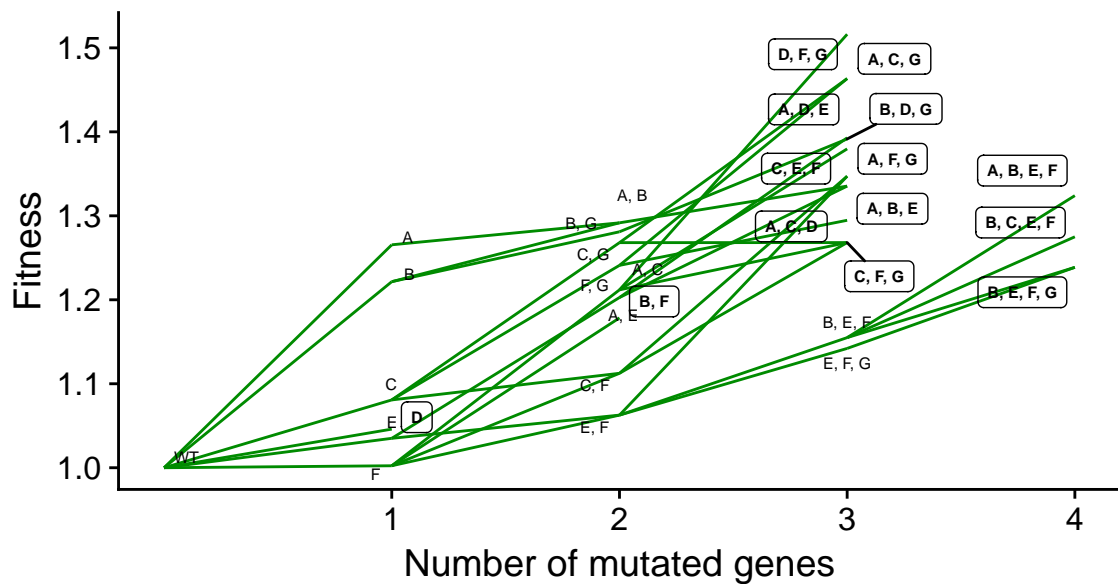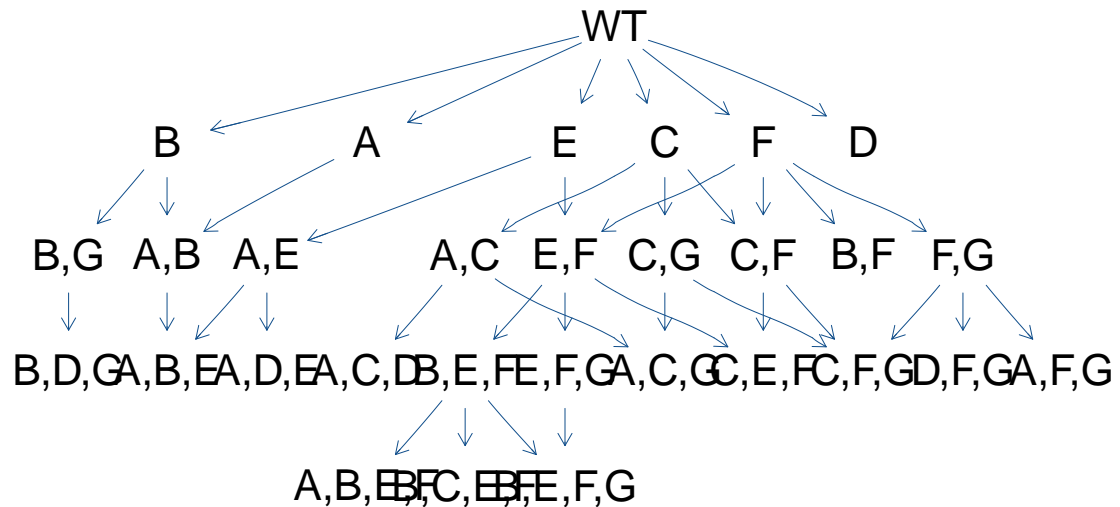



ID **EsTjWIE7vDhzVqNd**  
 acc genotypes **69**  
 peaks no back **20**  
 removed edges **NA**  
 prop rem edges **NA**

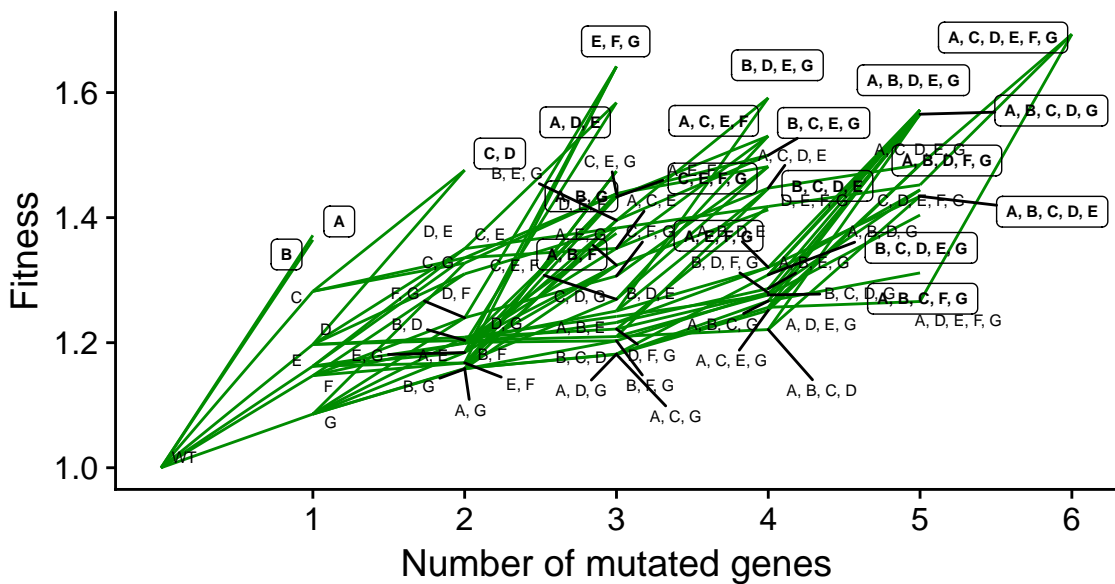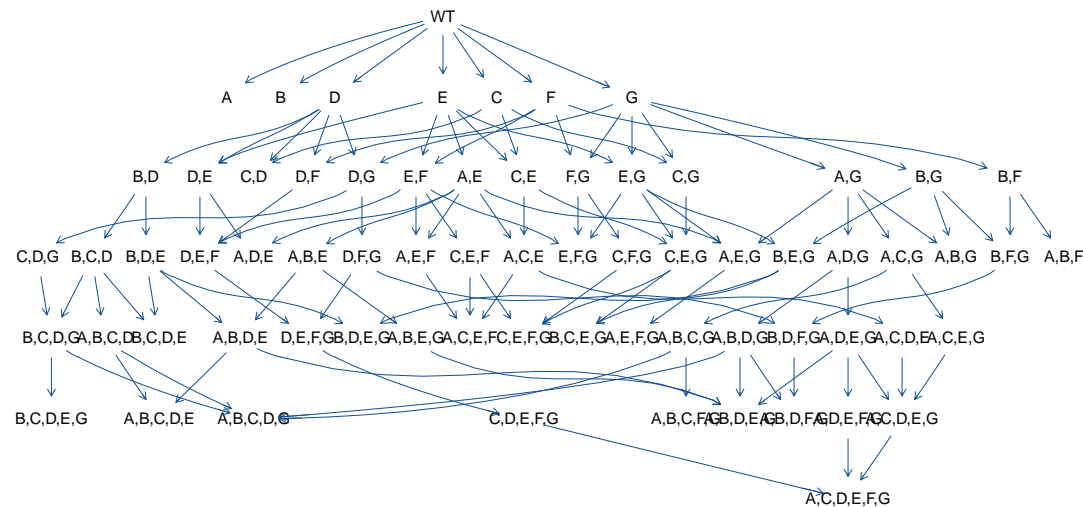

ID ETH7102TvoUx6htCa  
 acc genotypes 21  
 peaks no back 9  
 removed edges NA  
 prop rem edges NA

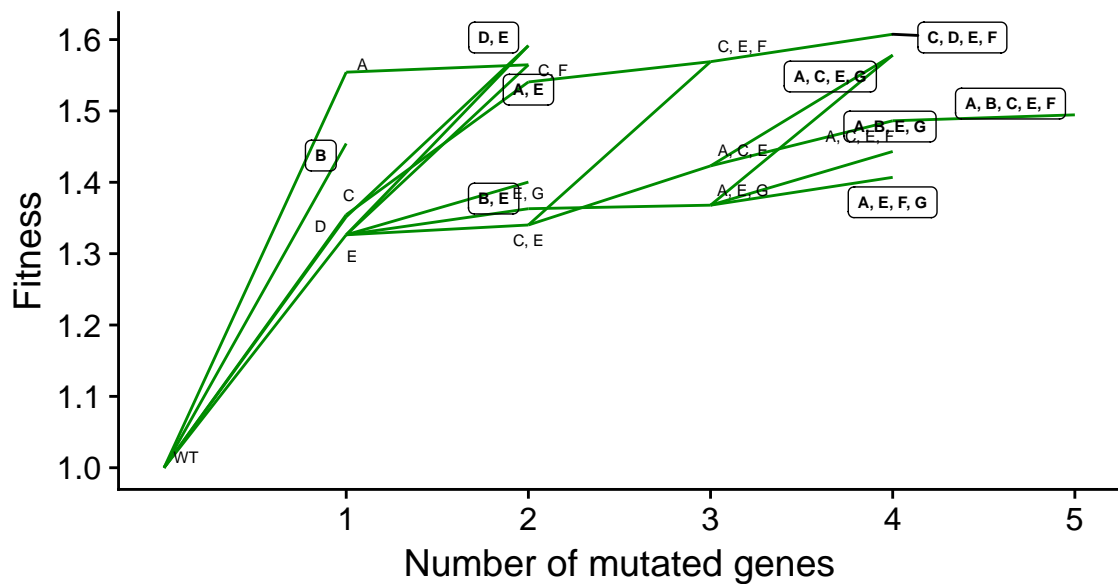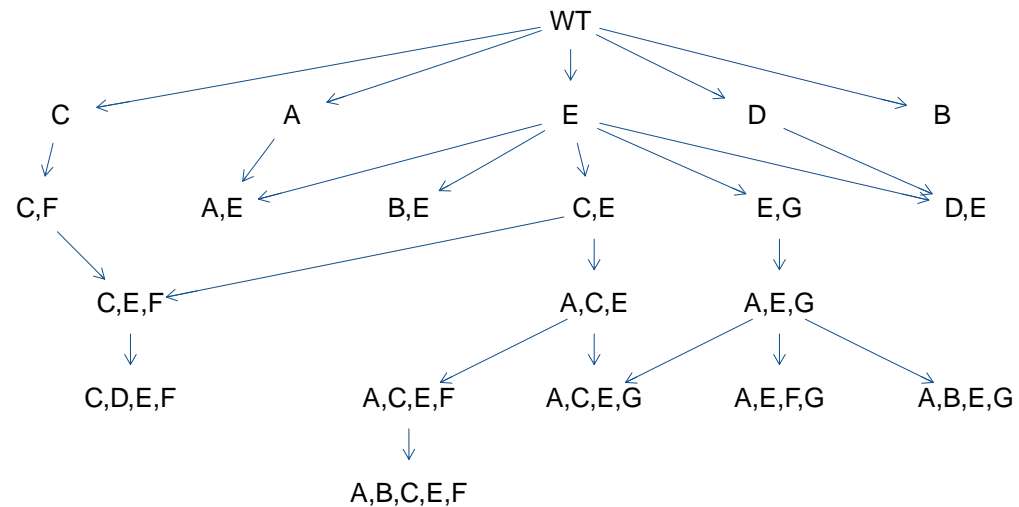

ID eUzrnqLvkhTTj  
 acc genotypes 40  
 peaks no back 11  
 removed edges NA  
 prop rem edges NA

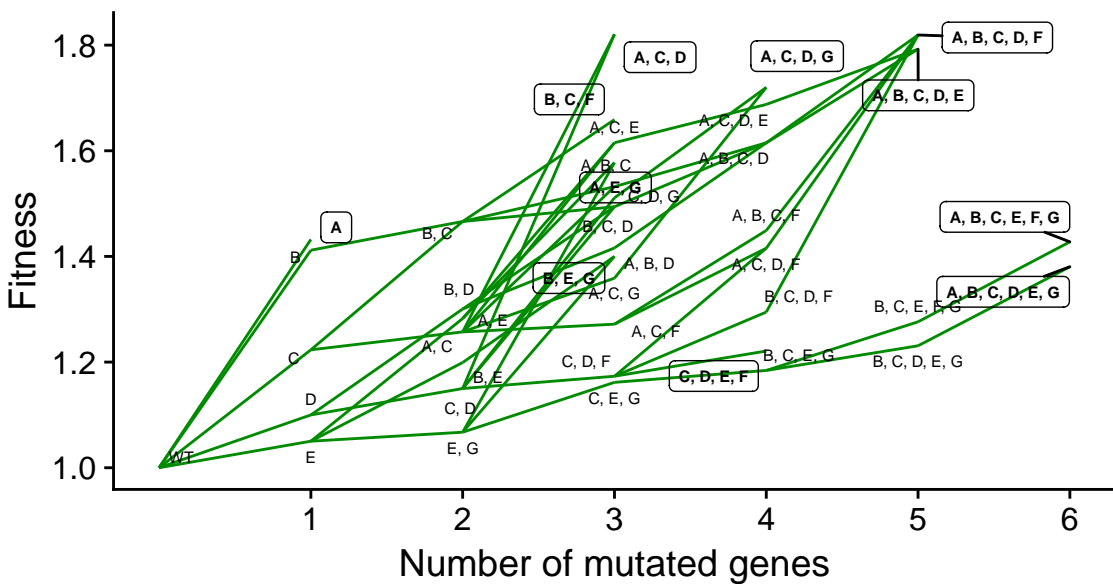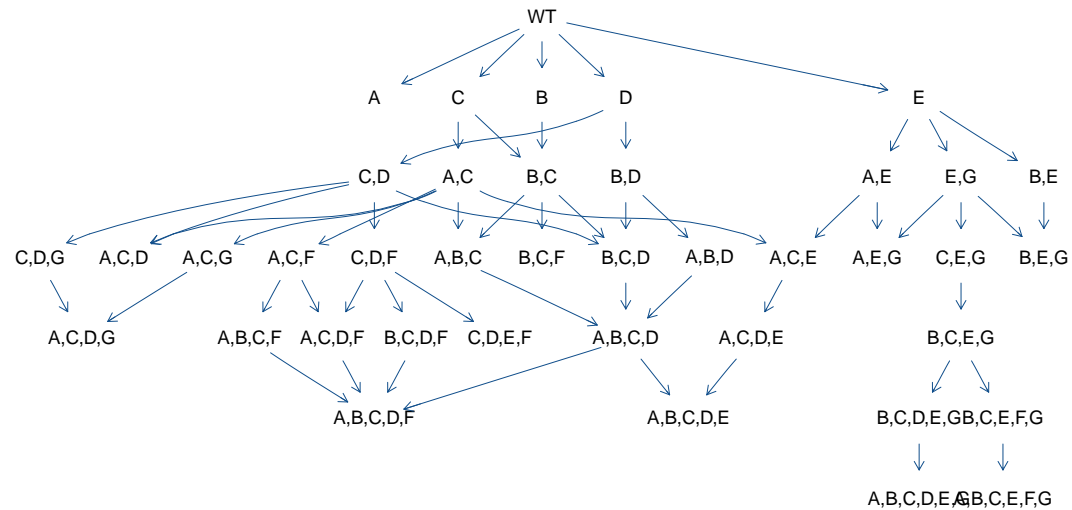

ID fdZVeDILcm54cJxM  
 acc genotypes 41  
 peaks no back 17  
 removed edges NA  
 prop rem edges NA

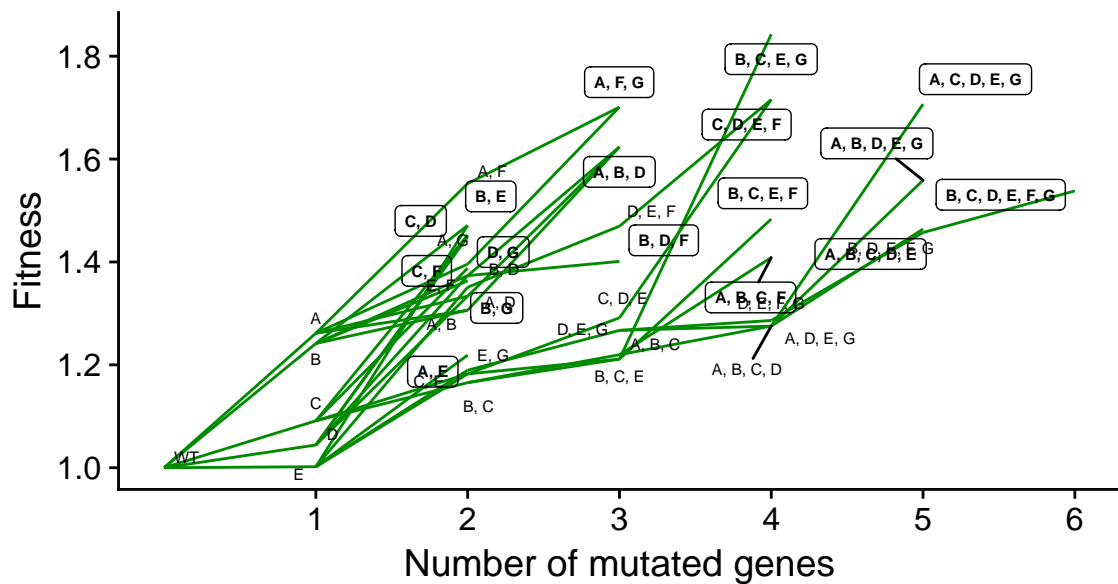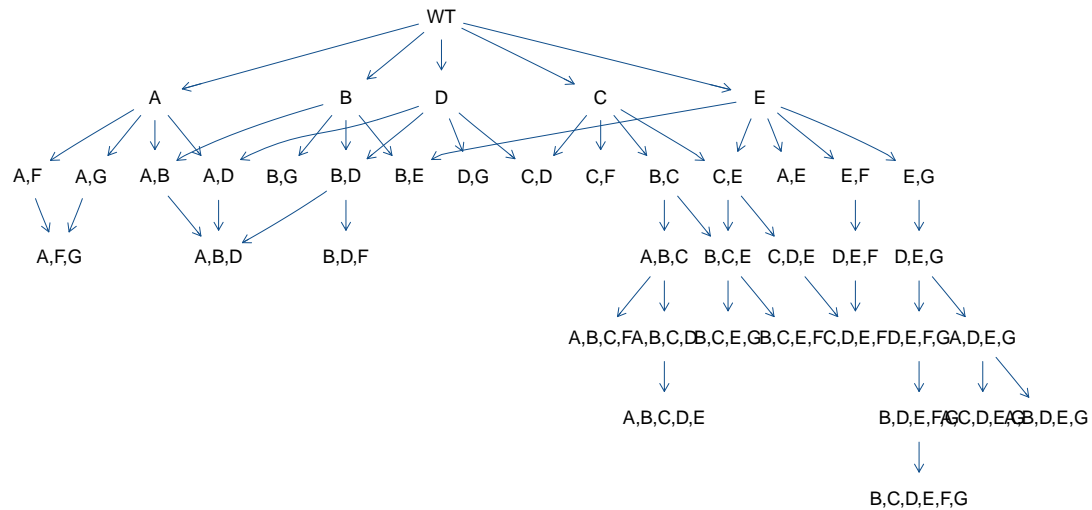



ID **fEwT1uohy1ShL5nH**  
 acc genotypes **38**  
 peaks no back **17**  
 removed edges **NA**  
 prop rem edges **NA**

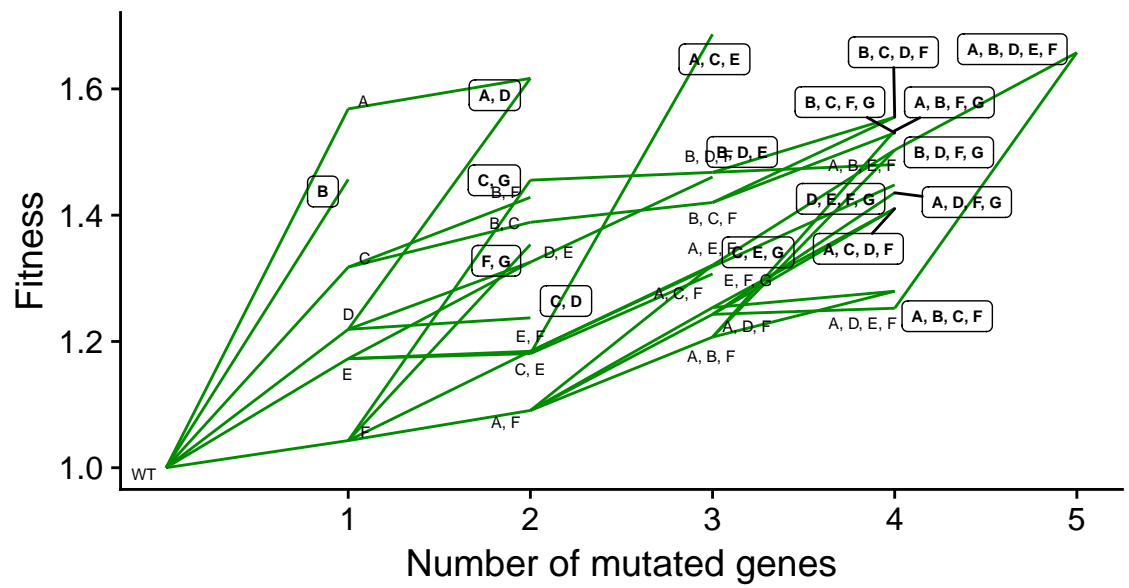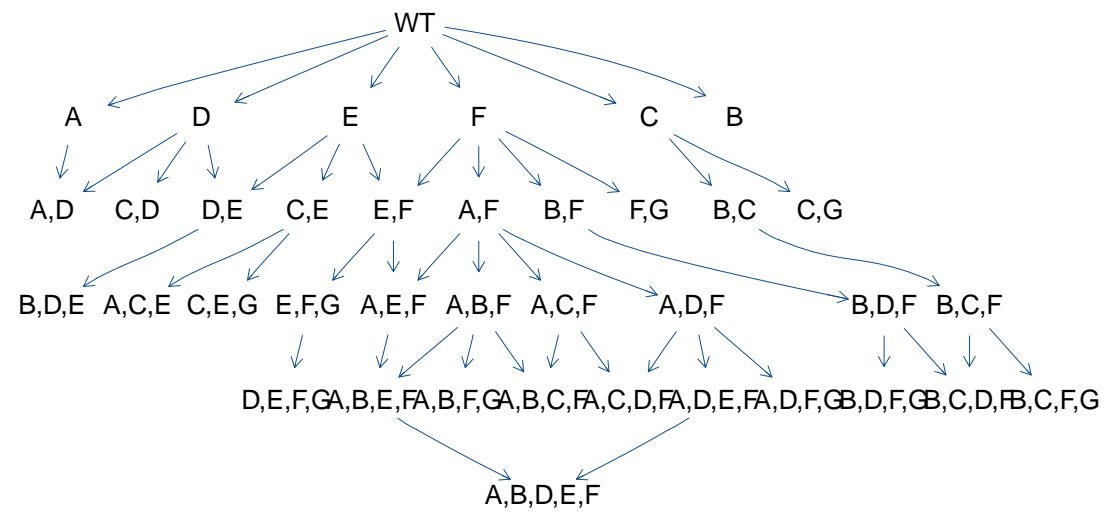

*ID* fS10Ju2gMFkEFOANK  
*acc genotypes* 20  
*peaks no back* 8  
*removed edges* NA  
*prop rem edges* NA

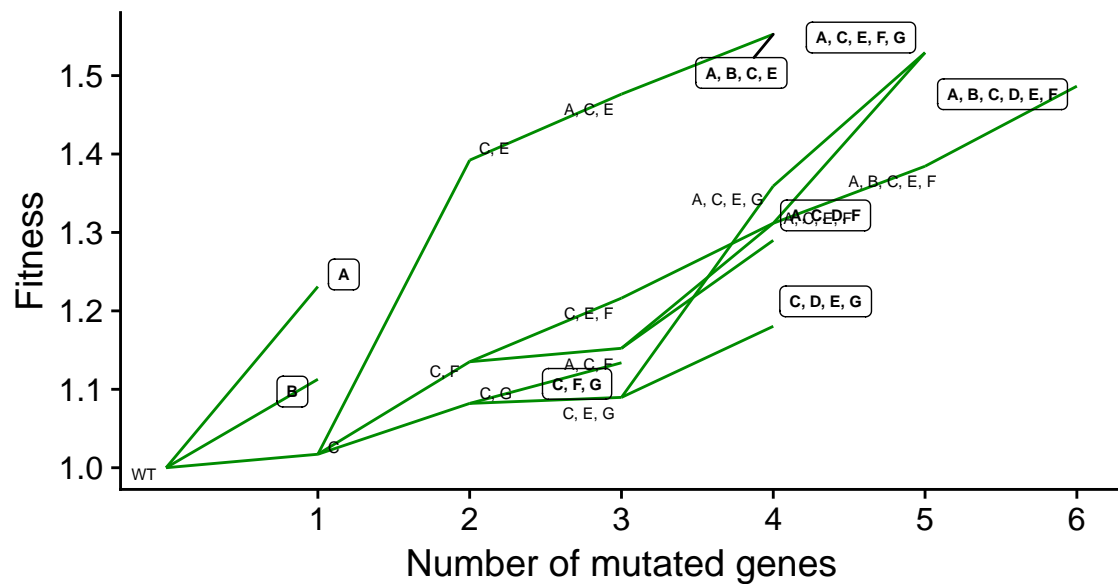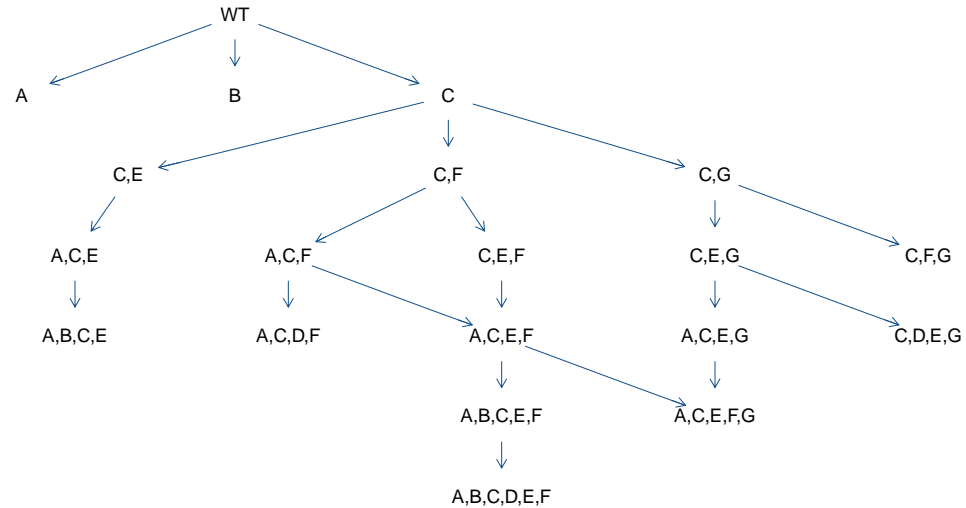

ID Fwg3jWZQftuLFTc8  
 acc genotypes 43  
 peaks no back 13  
 removed edges NA  
 prop rem edges NA

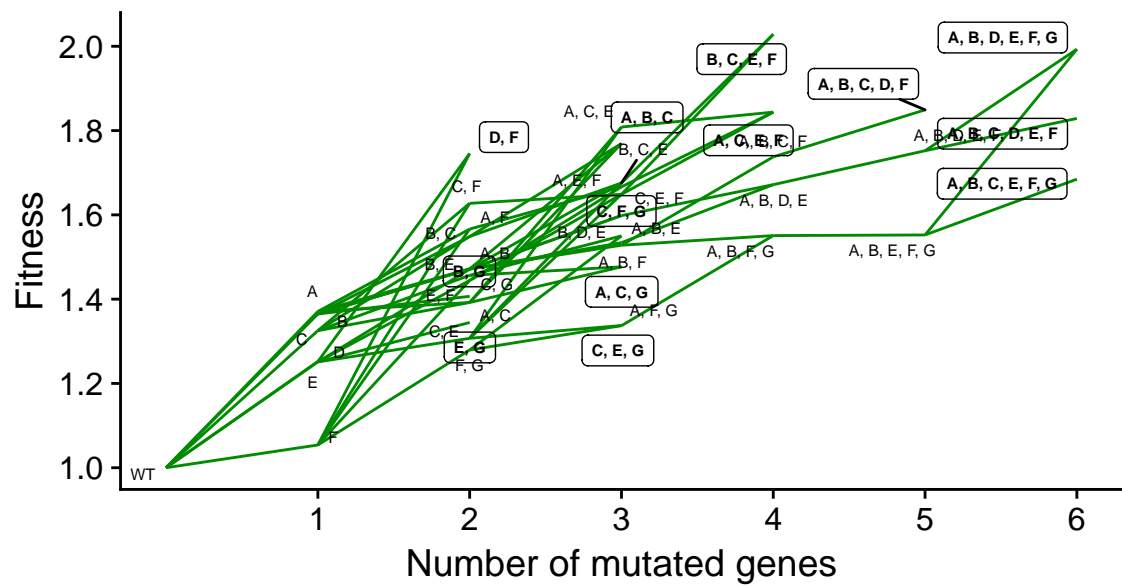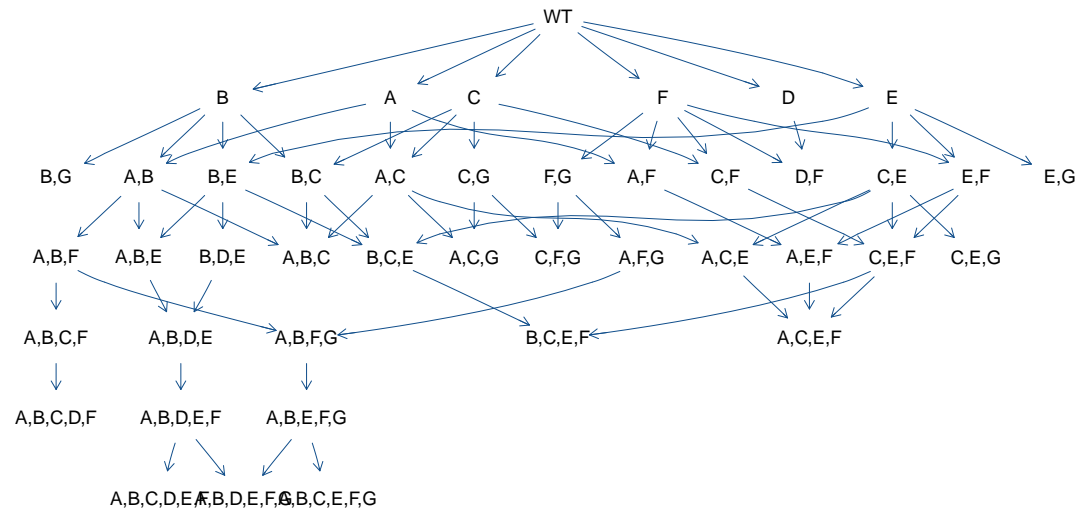



ID fzwb5MOAwOWpF4B9  
 acc genotypes 62  
 peaks no back 18  
 removed edges NA  
 prop rem edges NA

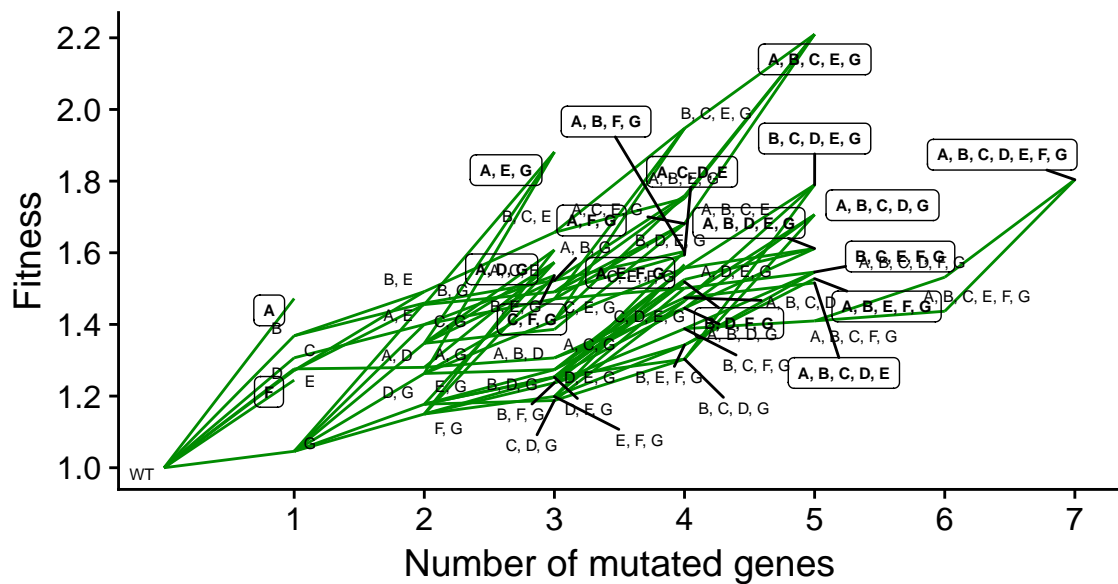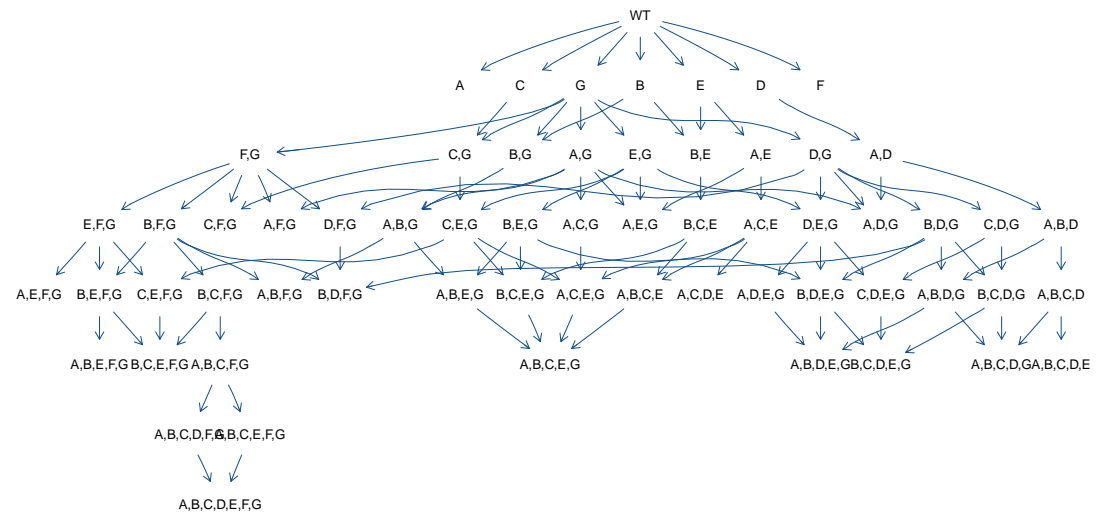

ID GDVo4gmjaDr6lo1c  
 acc genotypes 51  
 peaks no back 16  
 removed edges NA  
 prop rem edges NA

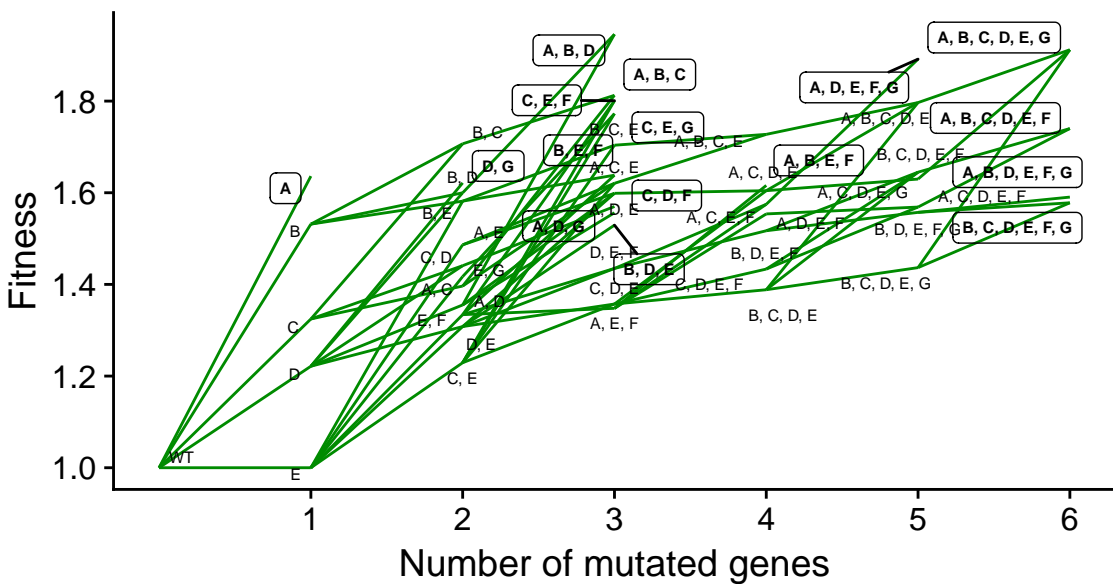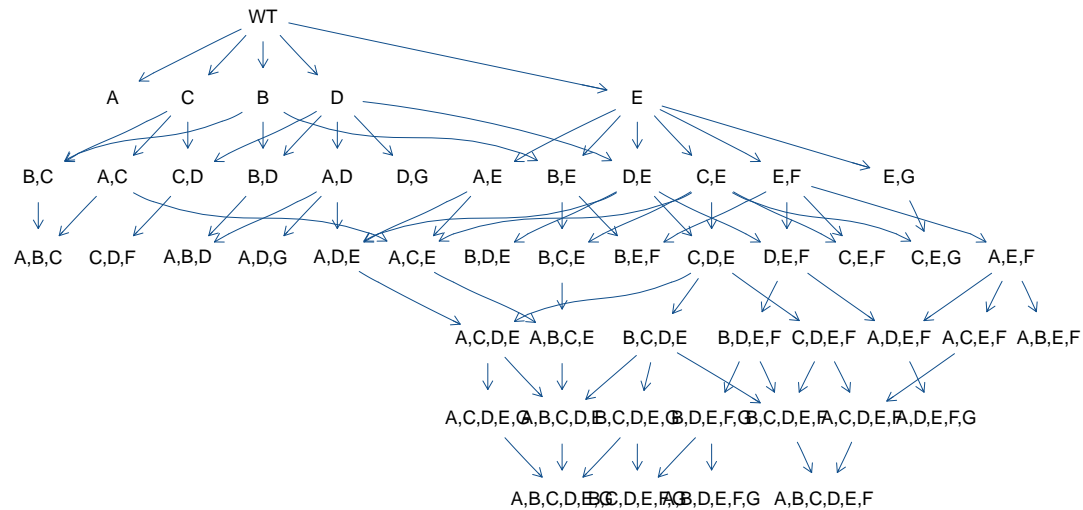

ID gHFY6JsOn10PnBYf3  
 acc genotypes 40  
 peaks no back 13  
 removed edges NA  
 prop rem edges NA

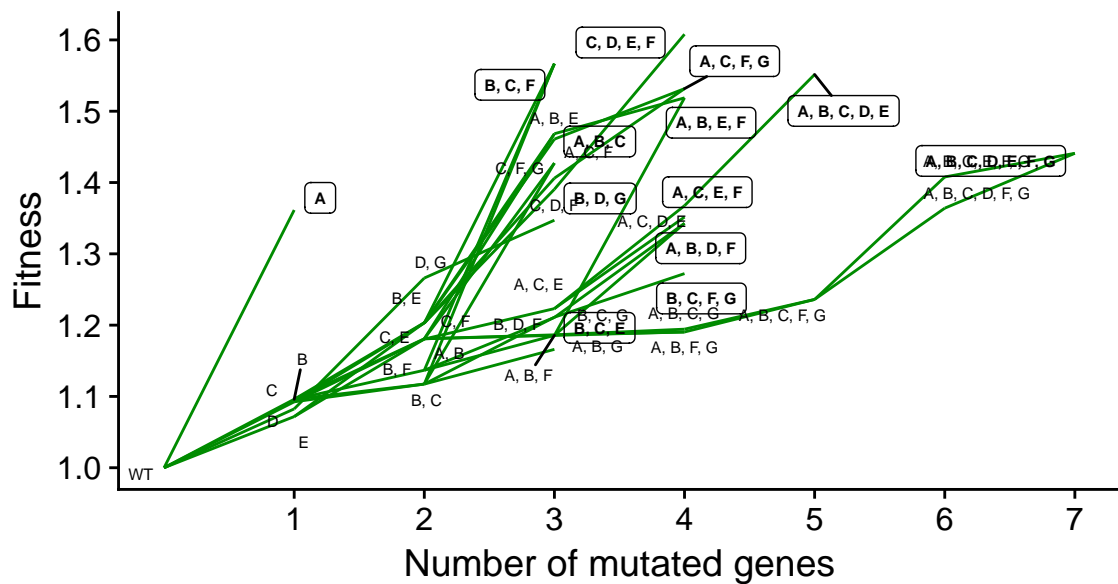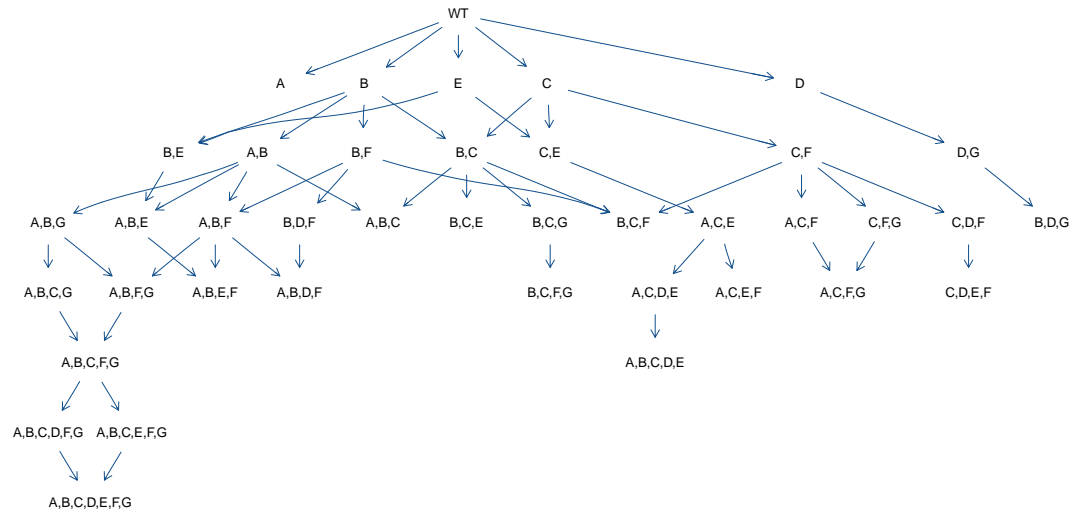

ID GJH85dNm2AtrzoUI  
 acc genotypes 30  
 peaks no back 13  
 removed edges NA  
 prop rem edges NA

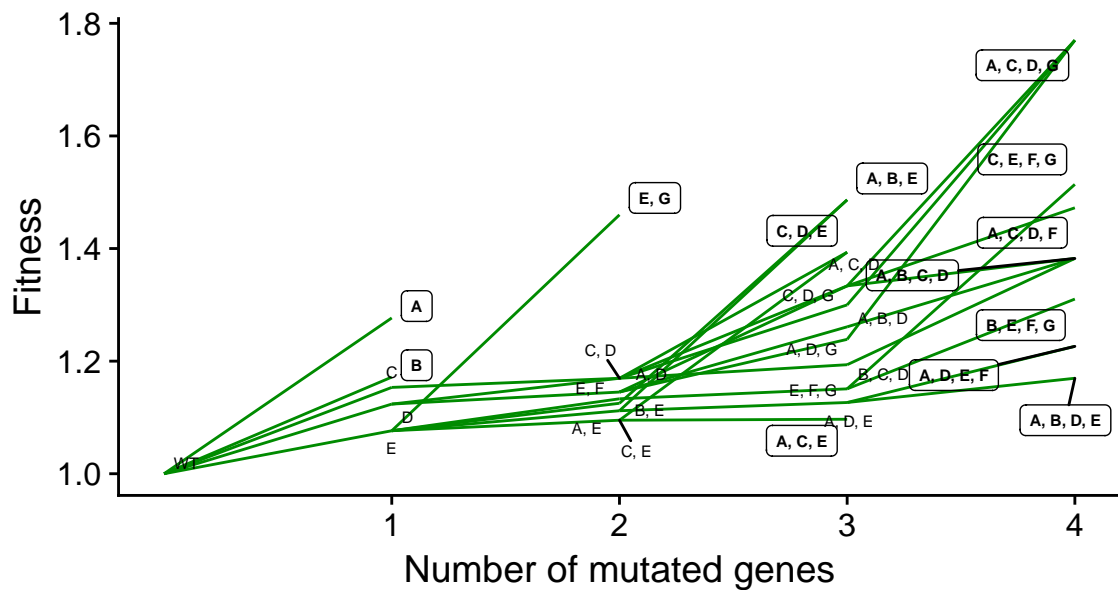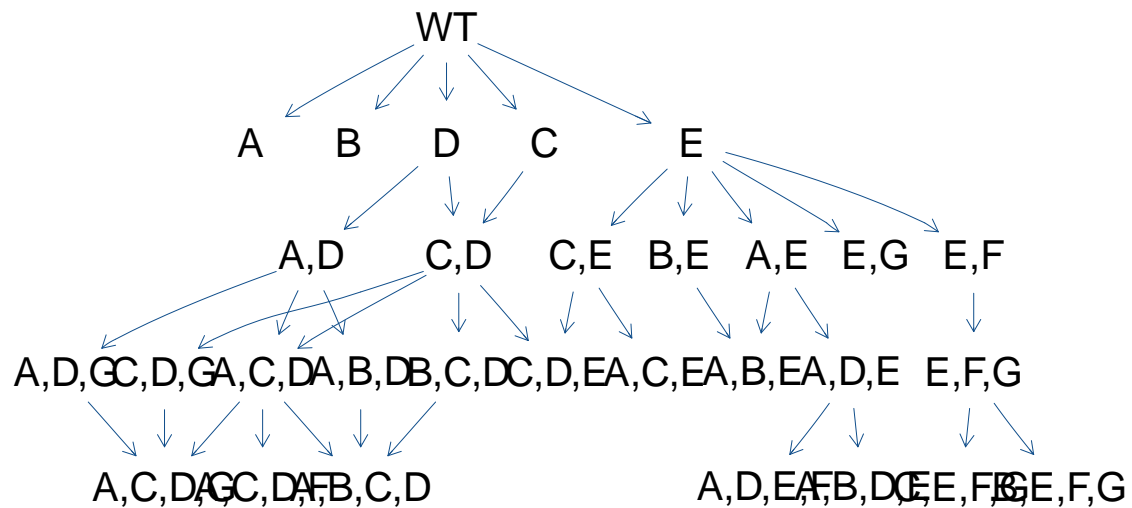

ID GrnJzITUvPUix6BN  
 acc genotypes 51  
 peaks no back 19  
 removed edges NA  
 prop rem edges NA

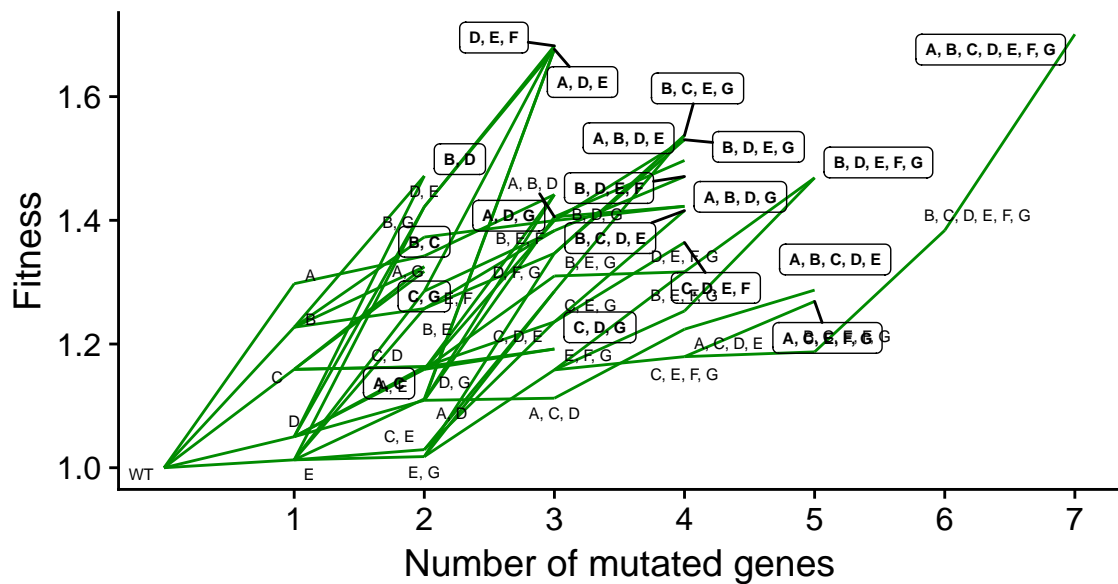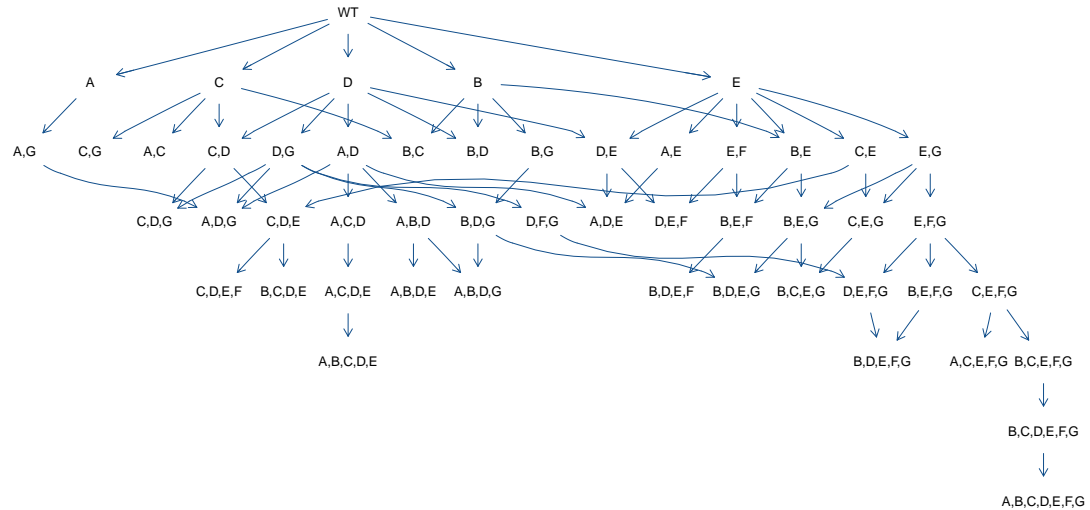

ID Hm3E9vk10sP85Ykfb  
 acc genotypes 14  
 peaks no back 6  
 removed edges NA  
 prop rem edges NA

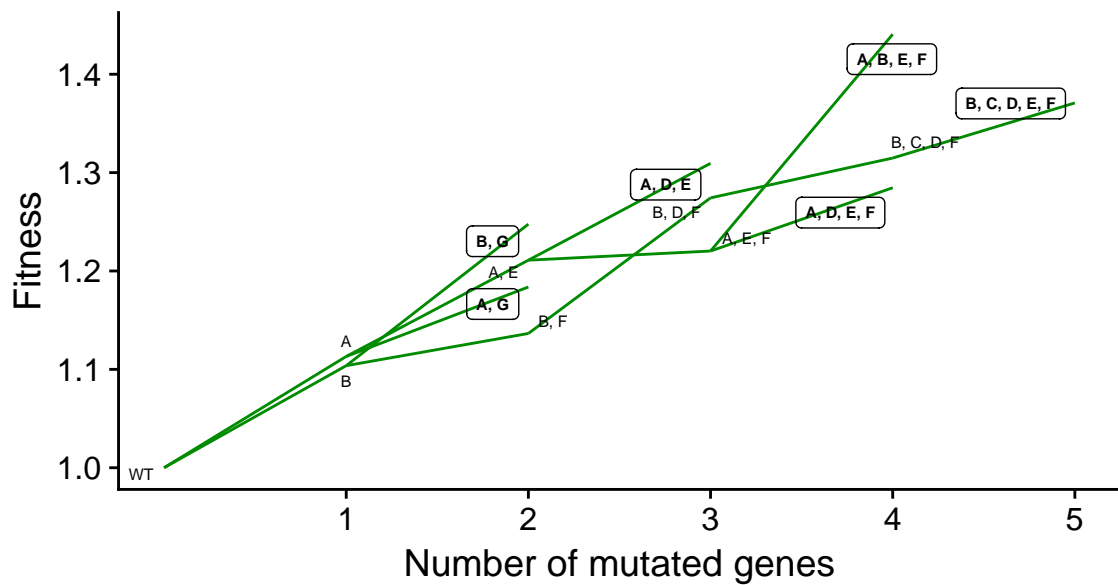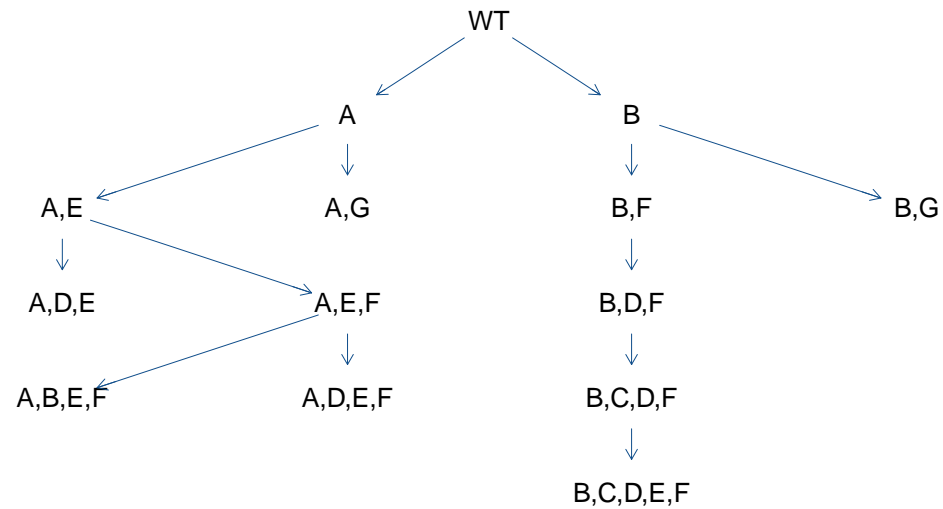



ID HUGD4mPft3Y9PL8i  
 acc genotypes 18  
 peaks no back 4  
 removed edges NA  
 prop rem edges NA

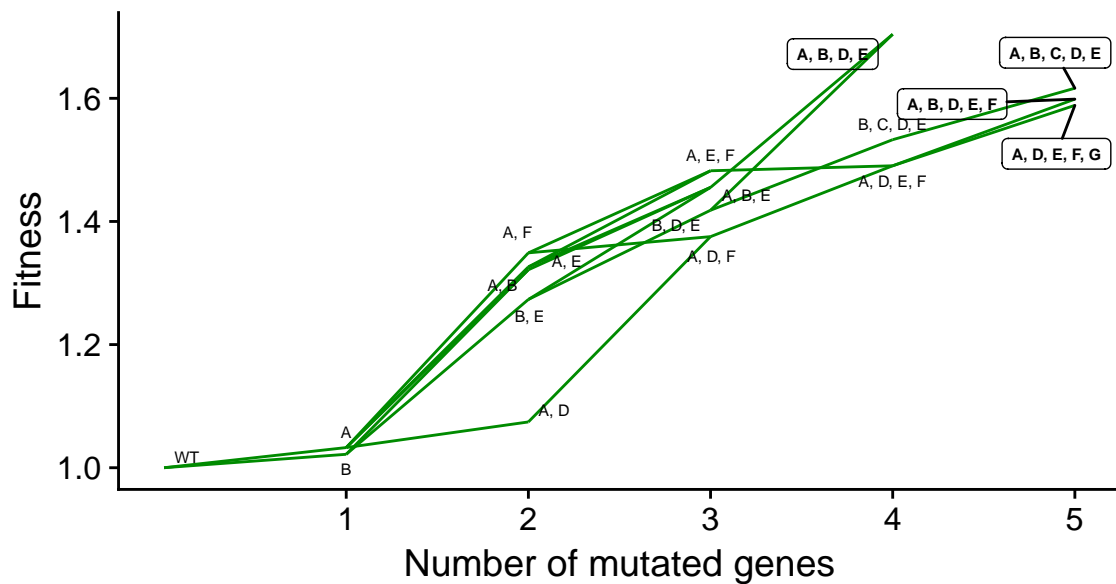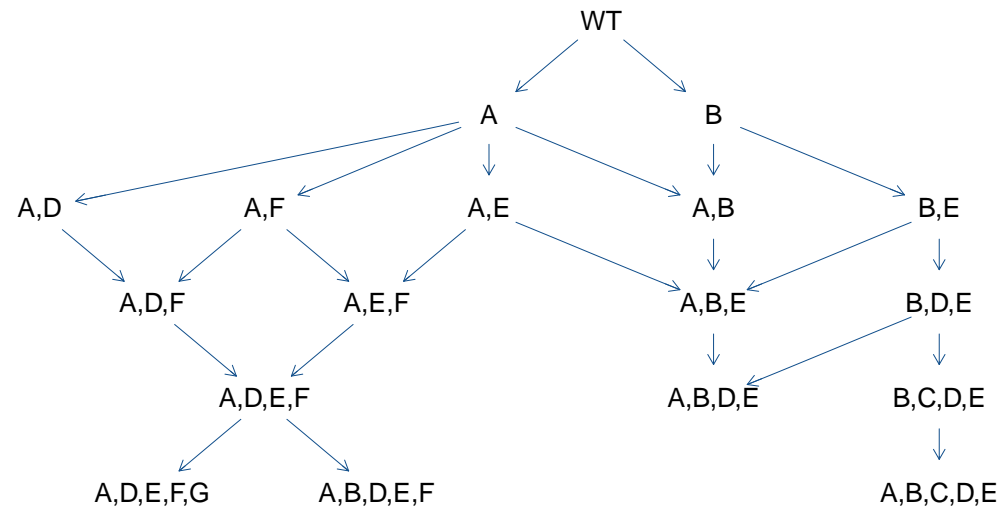



*ID* HVUm1KRpYXeSvmPO  
*acc genotypes* 28  
*peaks no back* 13  
*removed edges* NA  
*prop rem edges* NA

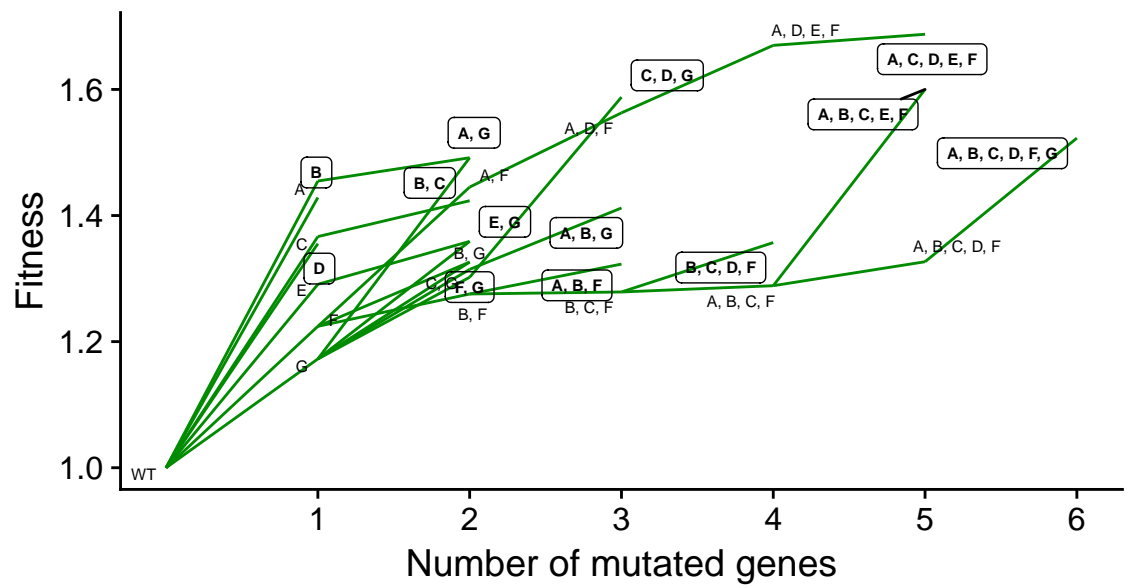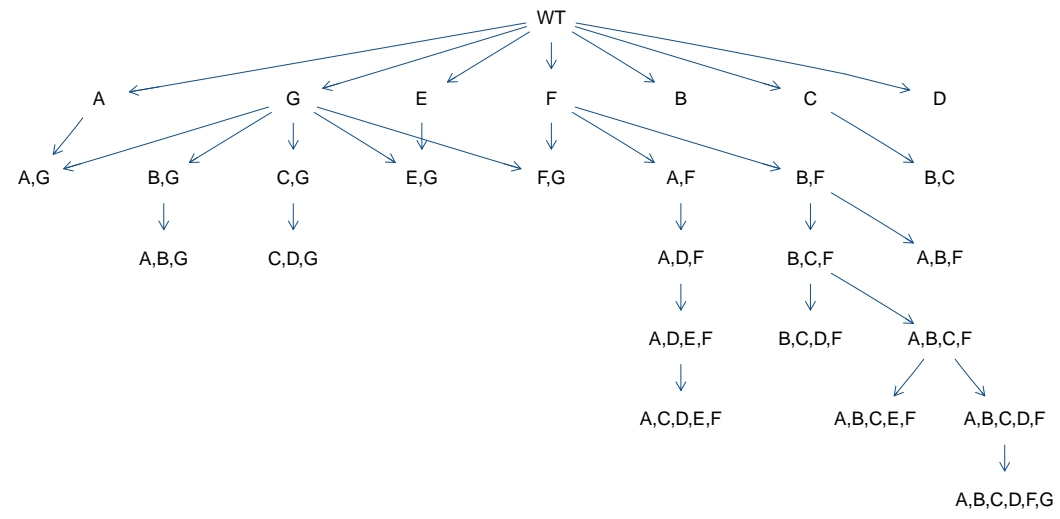





ID **hz9XzL5TRK BXI8Xk**  
 acc genotypes **45**  
 peaks no back **21**  
 removed edges **NA**  
 prop rem edges **NA**

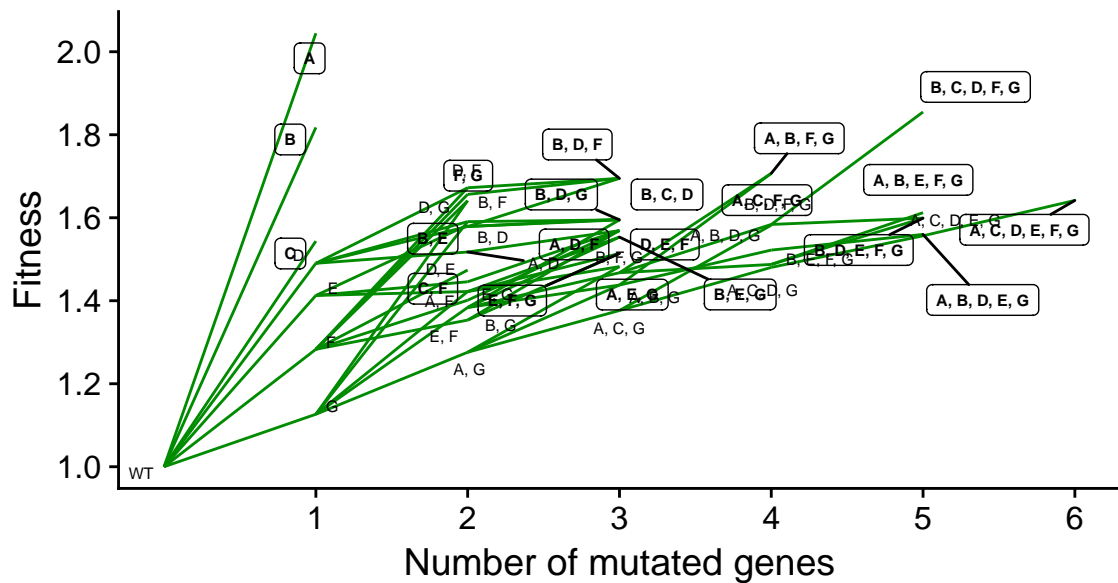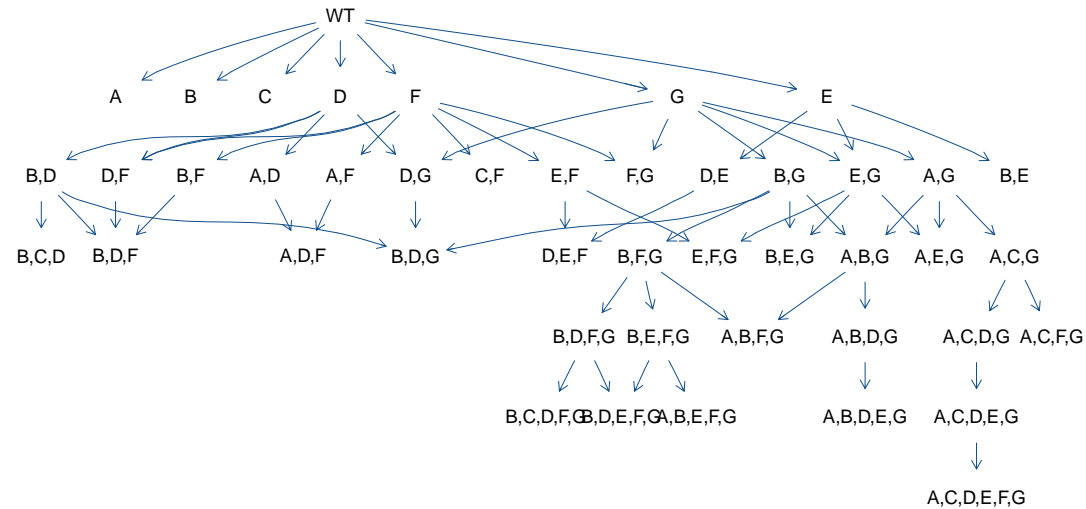

ID [i102joVz69wXudllf](#)  
 acc genotypes 26  
 peaks no back 11  
 removed edges NA  
 prop rem edges NA

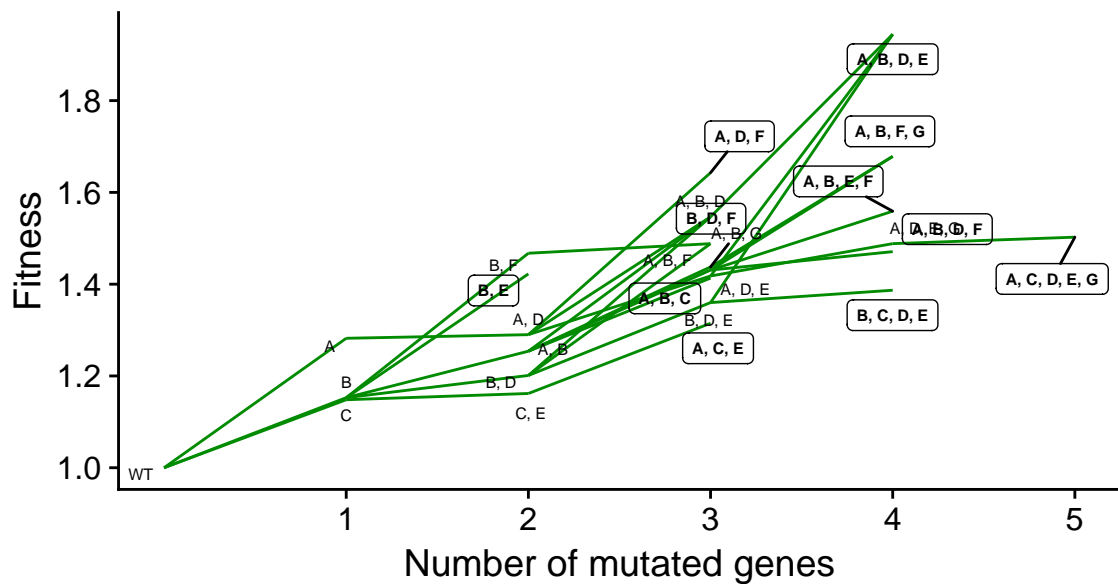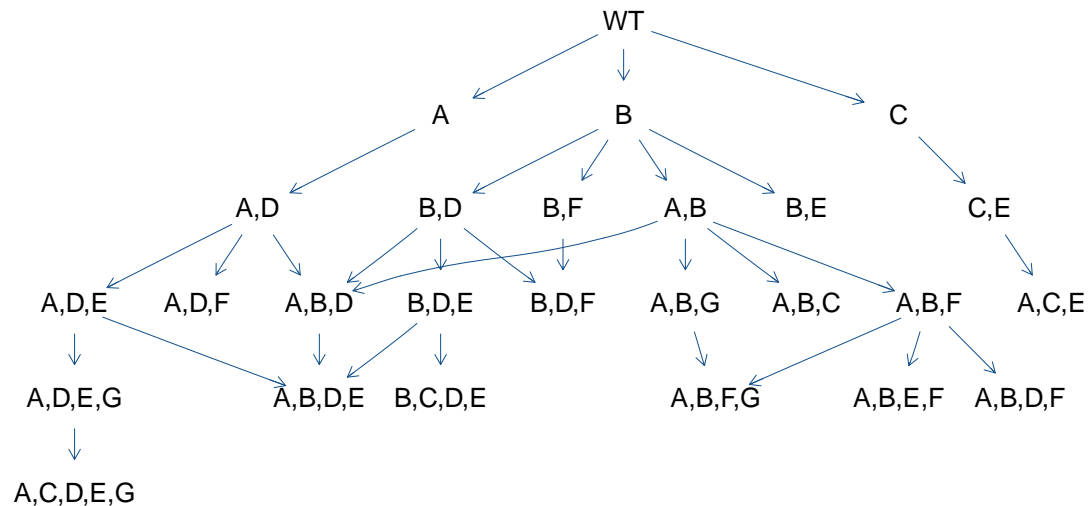

ID I4wGMzShjuo8XyuN  
 acc genotypes 43  
 peaks no back 18  
 removed edges NA  
 prop rem edges NA

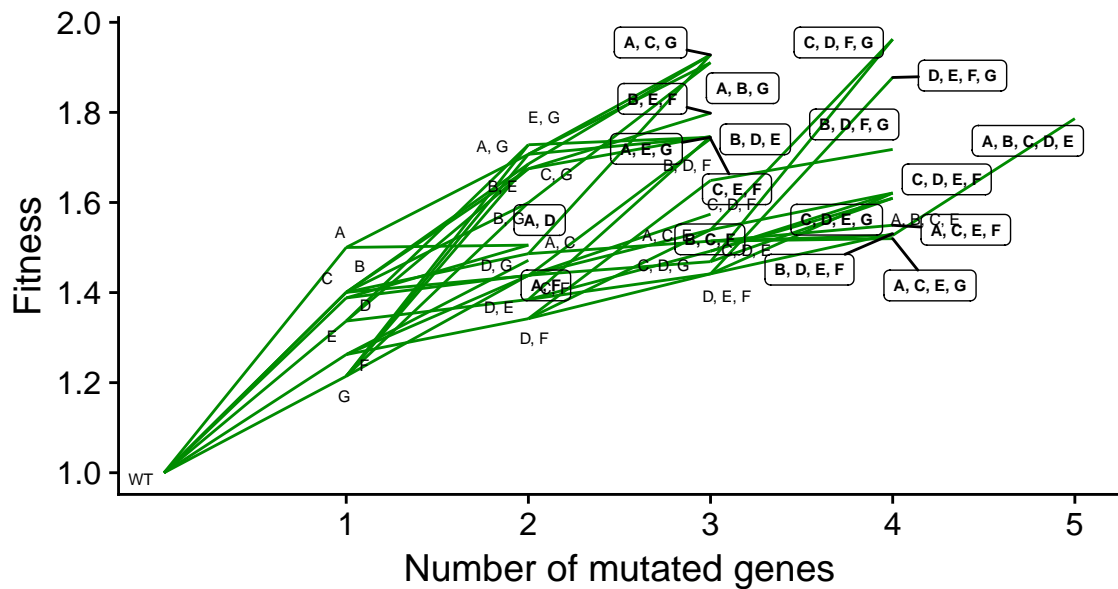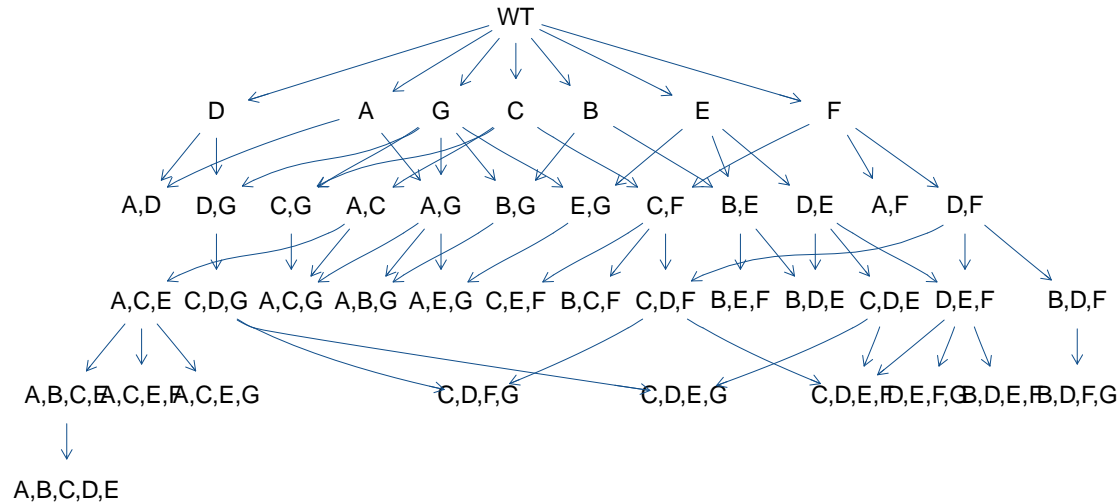

ID IDLT5qGFT3uM1rEn  
 acc genotypes 50  
 peaks no back 19  
 removed edges NA  
 prop rem edges NA

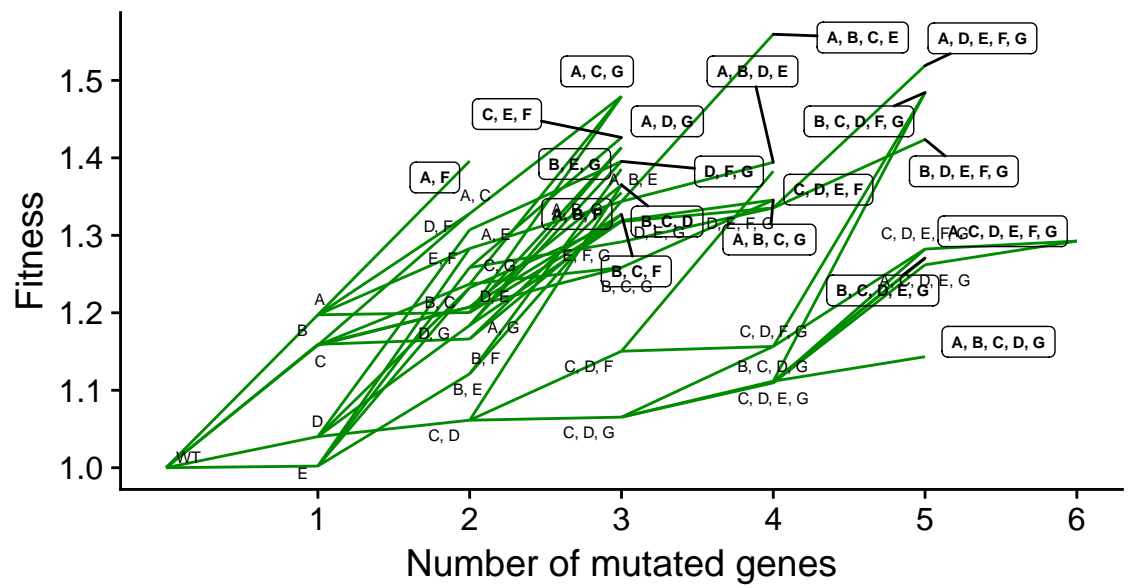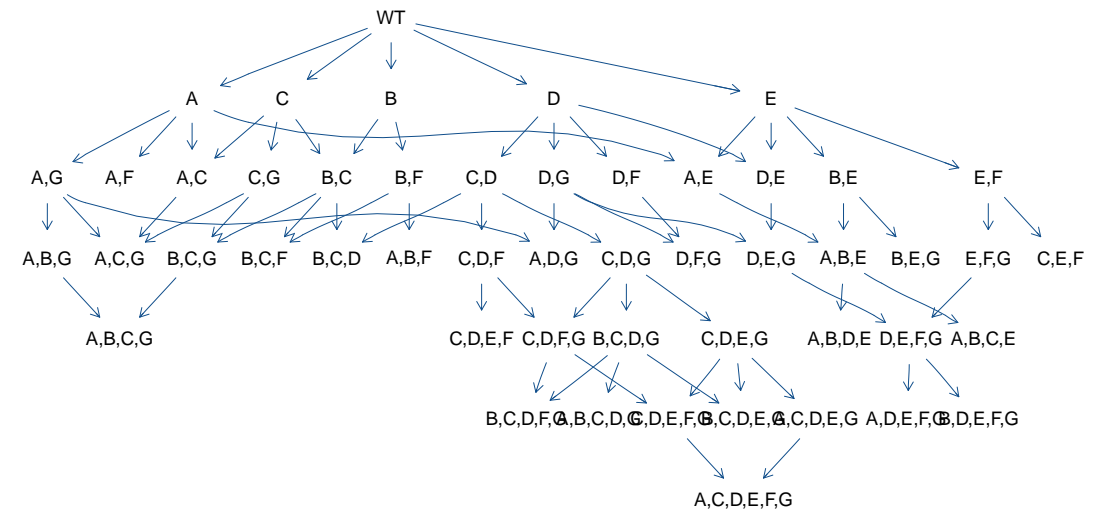





ID **iuizHj29wSFmqntf**  
 acc genotypes **39**  
 peaks no back **17**  
 removed edges **NA**  
 prop rem edges **NA**

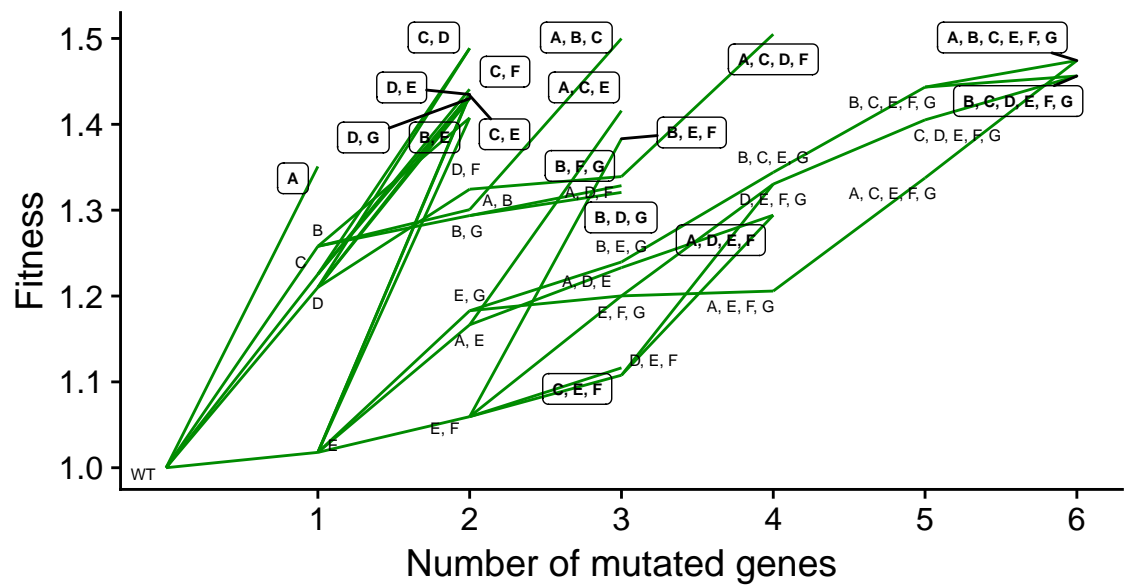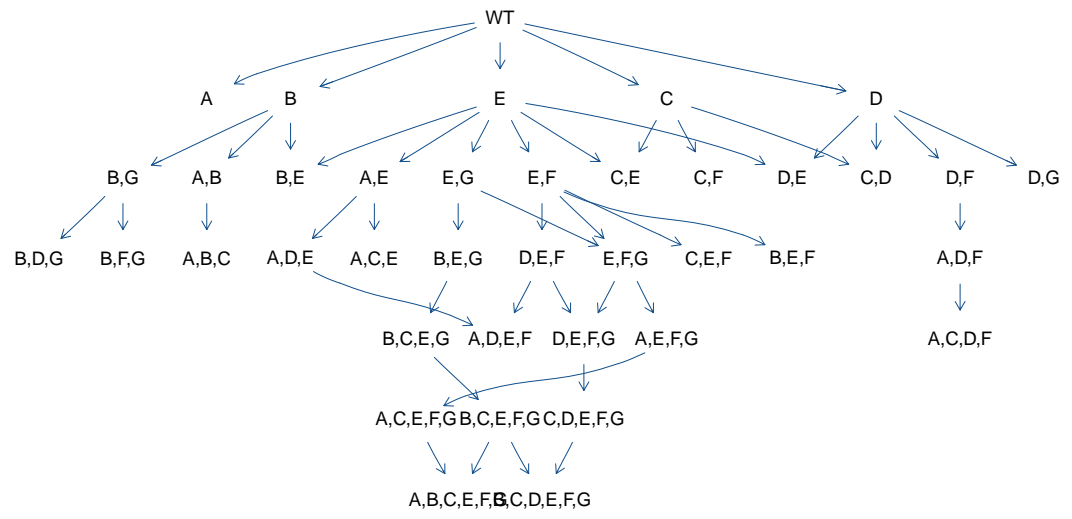

ID [jARDfKjvS5xglbjy](#)  
 acc genotypes 32  
 peaks no back 12  
 removed edges NA  
 prop rem edges NA

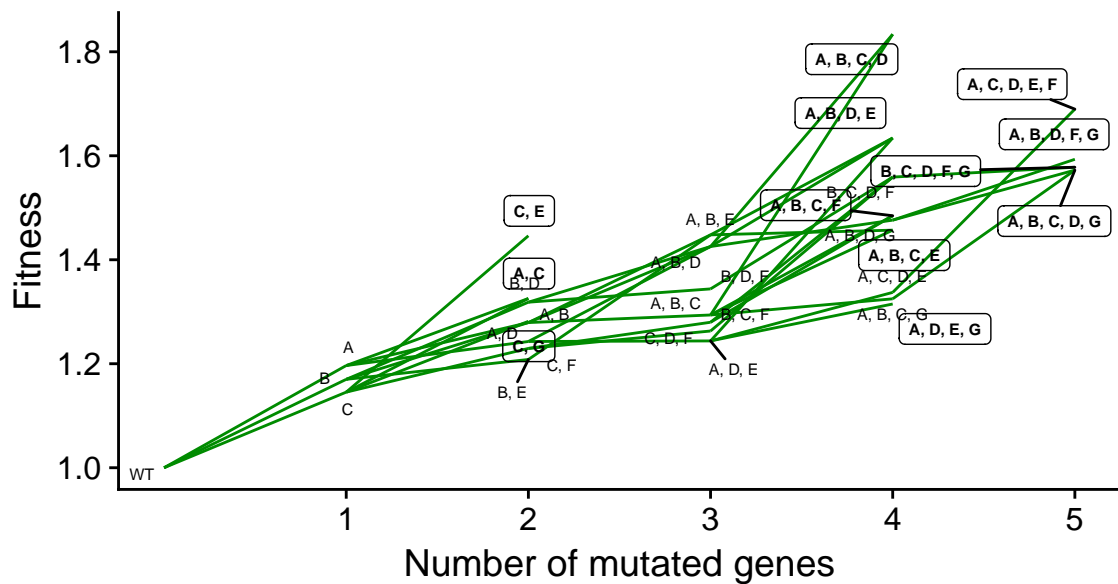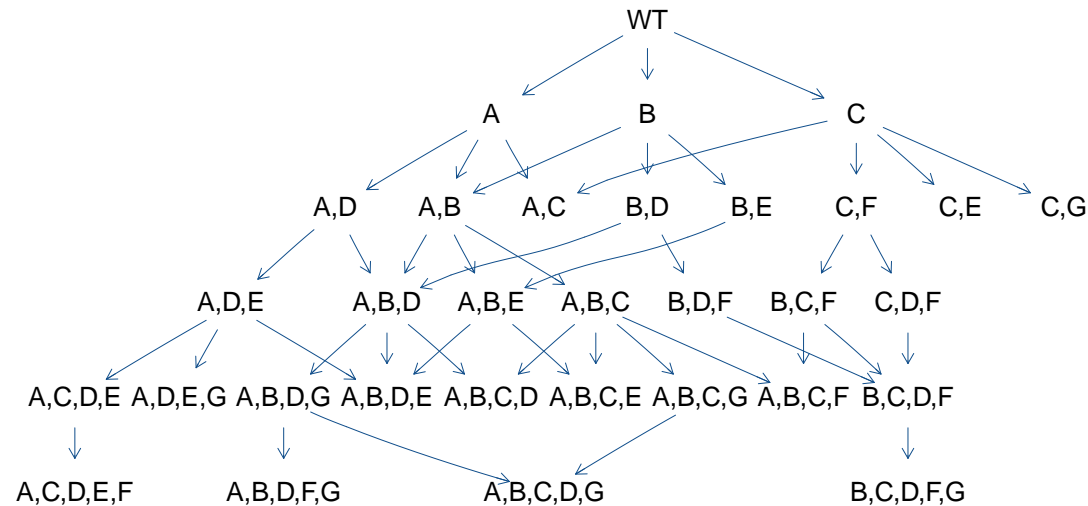

ID JC7USXL8yt3B9M10N  
 acc genotypes 36  
 peaks no back 15  
 removed edges NA  
 prop rem edges NA

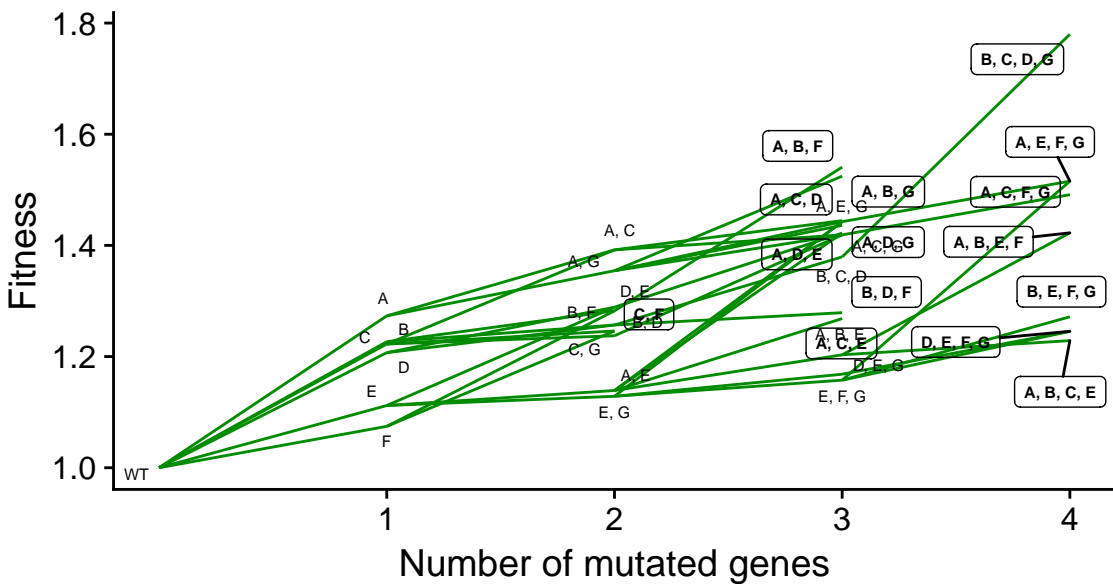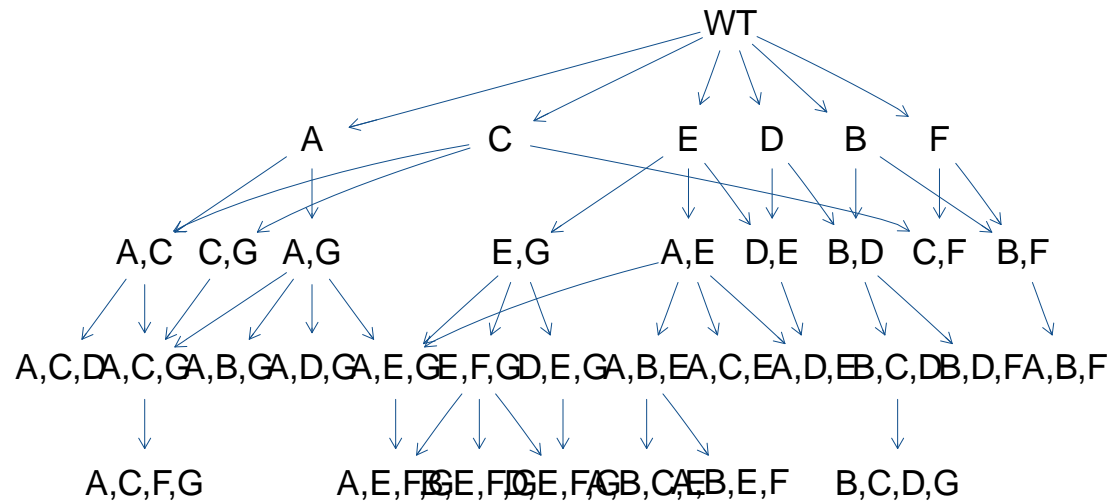

ID **JdleKg10Z6a5TIQp5**  
 acc genotypes **21**  
 peaks no back **7**  
 removed edges **NA**  
 prop rem edges **NA**

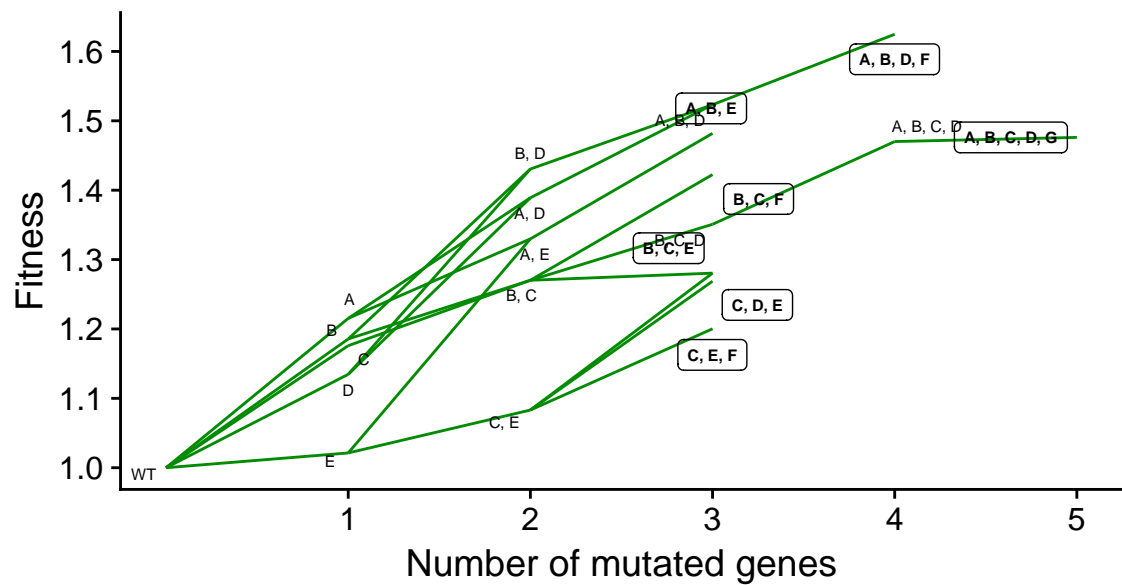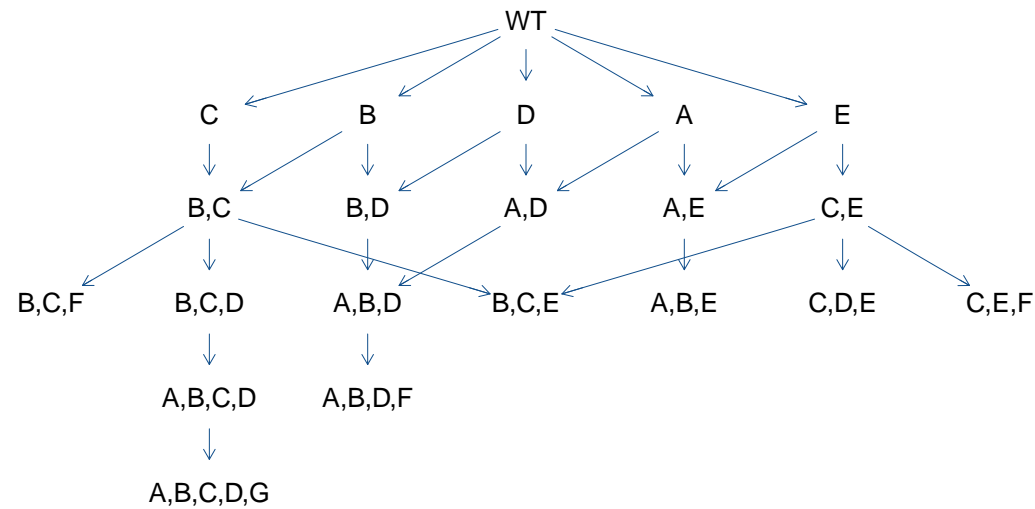

*ID* jJkQq5oUGT4cTflw  
*acc genotypes* 11  
*peaks no back* 5  
*removed edges* NA  
*prop rem edges* NA

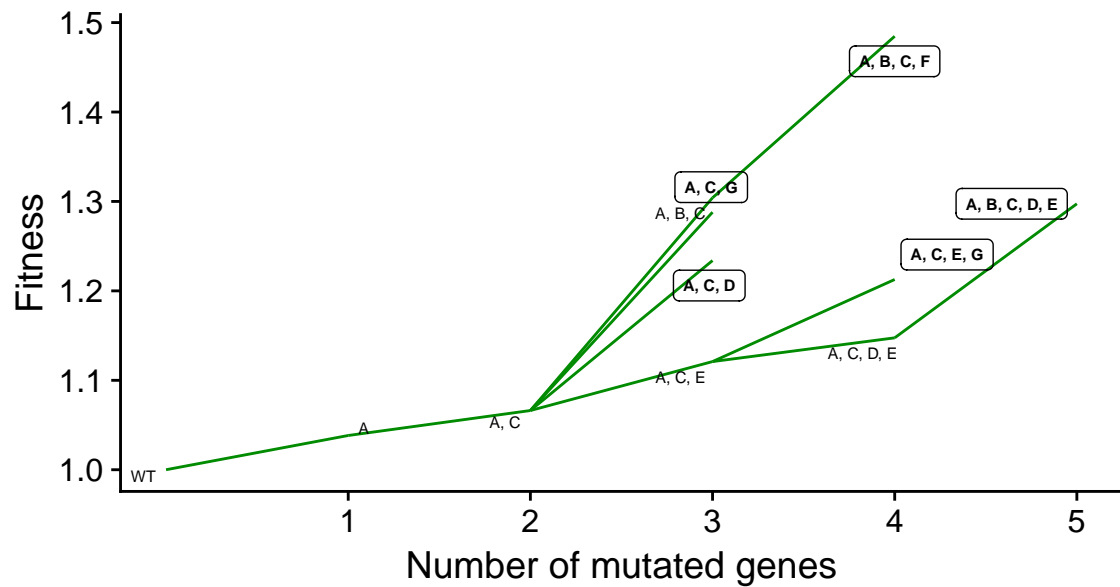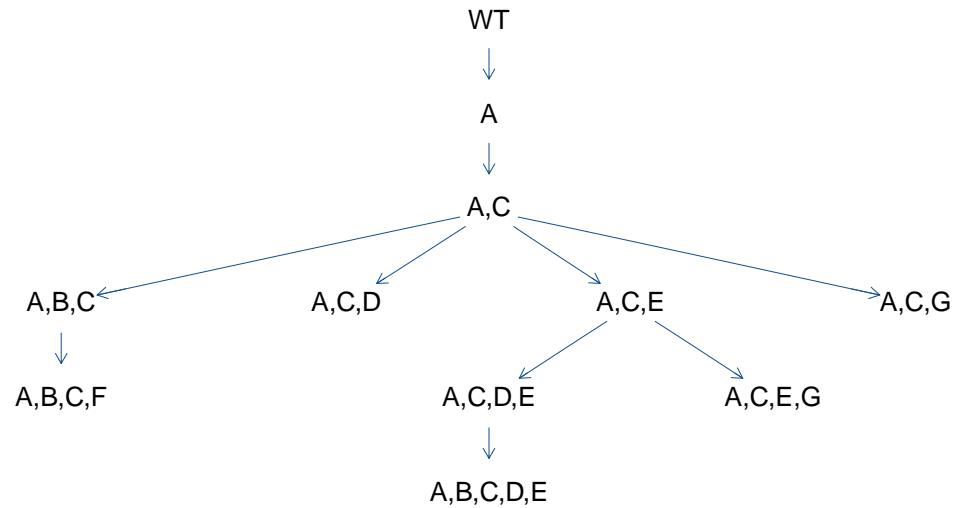

*ID* JqytlTKKThh5QBbf  
*acc genotypes* 11  
*peaks no back* 5  
*removed edges* NA  
*prop rem edges* NA

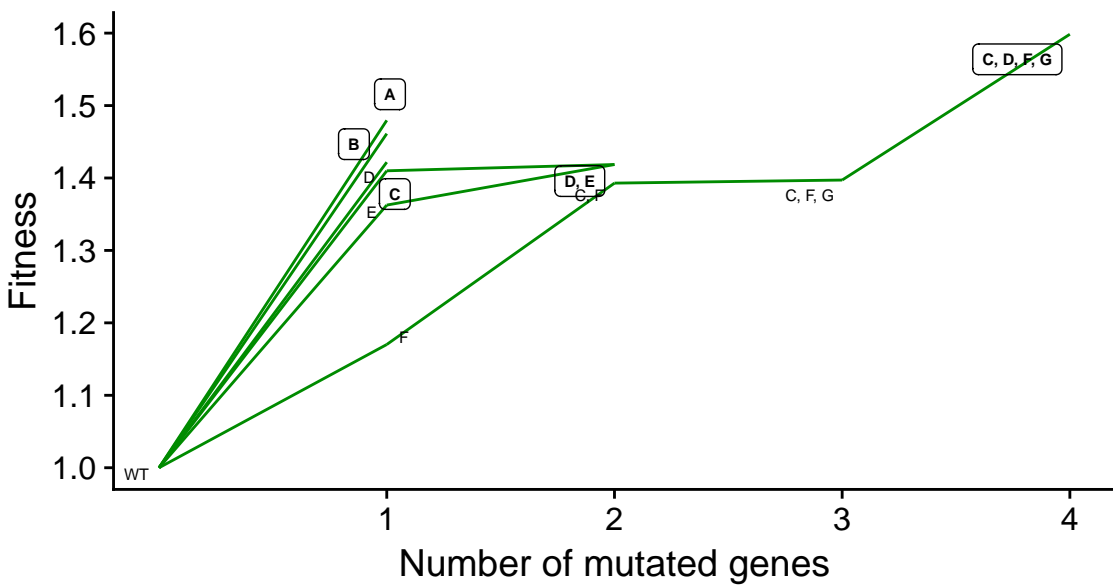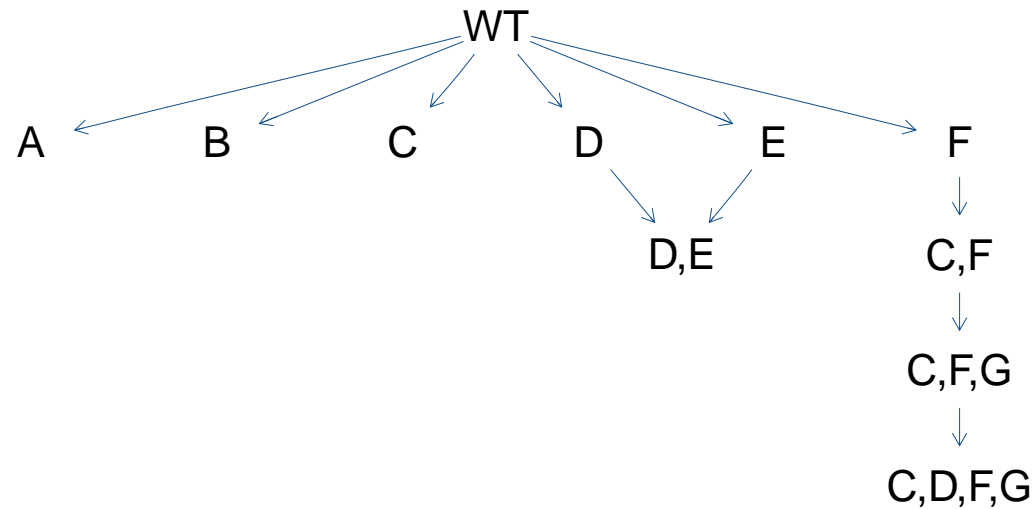

ID **juGYmalfWVHjDSsr**  
 acc genotypes **39**  
 peaks no back **15**  
 removed edges **NA**  
 prop rem edges **NA**

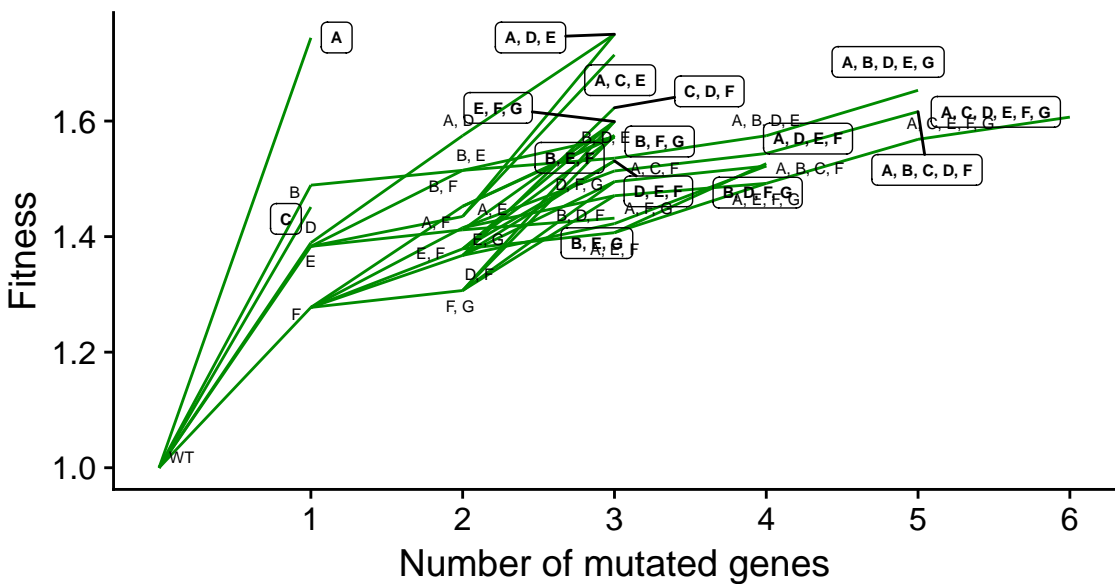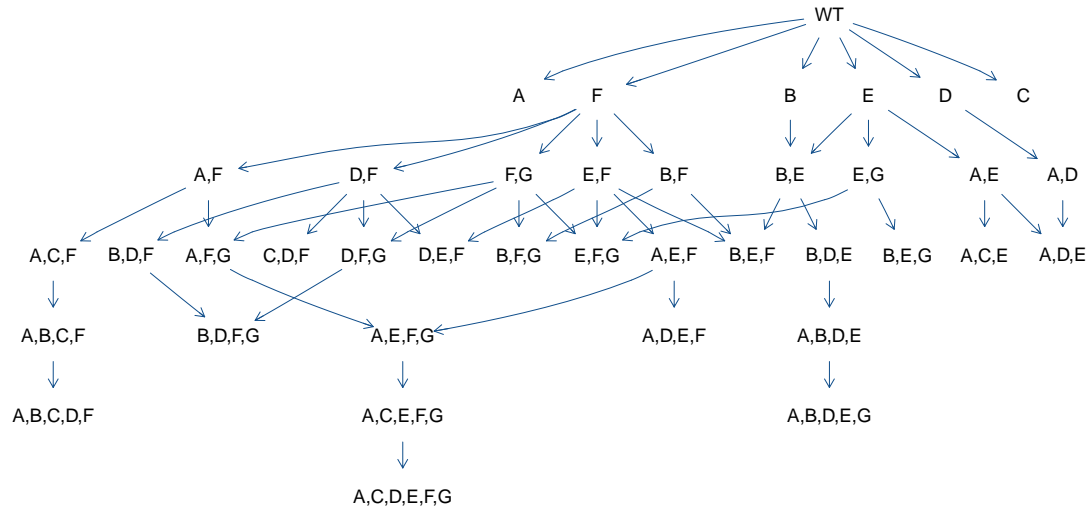





ID **k4wHgtkweyDrmCn8**  
 acc genotypes **80**  
 peaks no back **17**  
 removed edges **NA**  
 prop rem edges **NA**

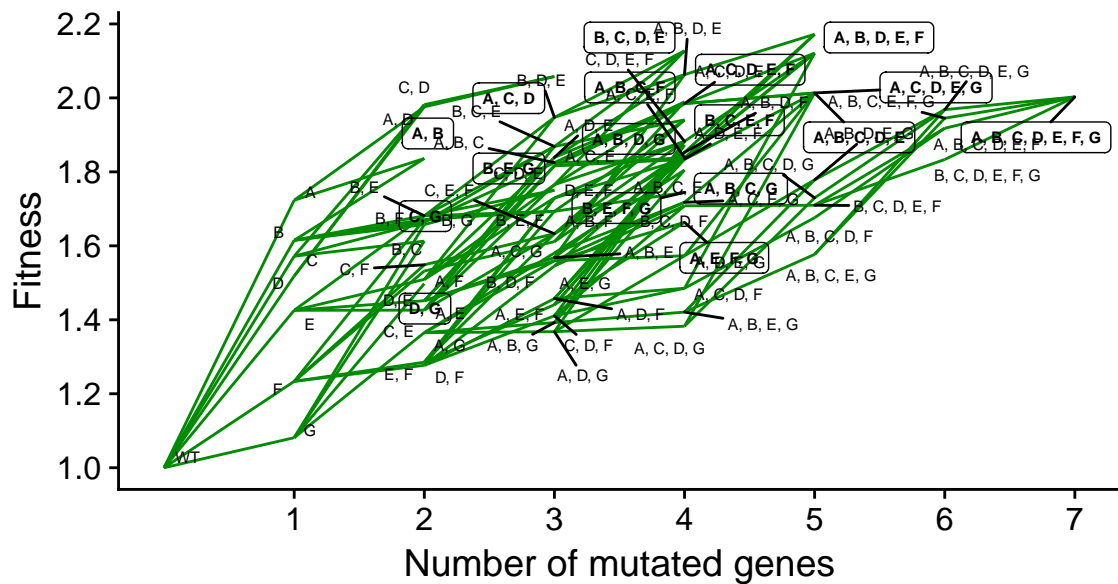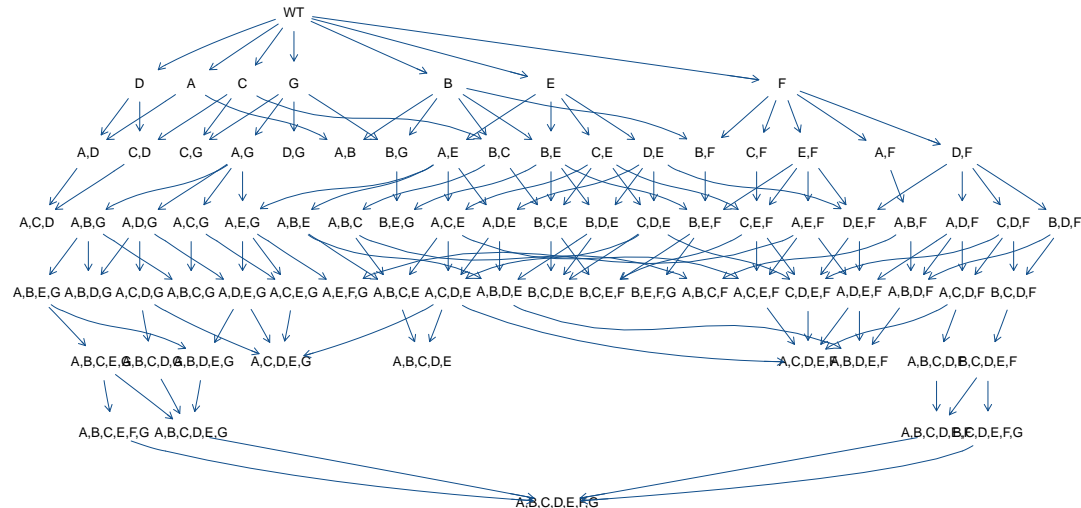

ID [kd10vK9jGcoOkaAMm](#)  
 acc genotypes 75  
 peaks no back 7  
 removed edges NA  
 prop rem edges NA

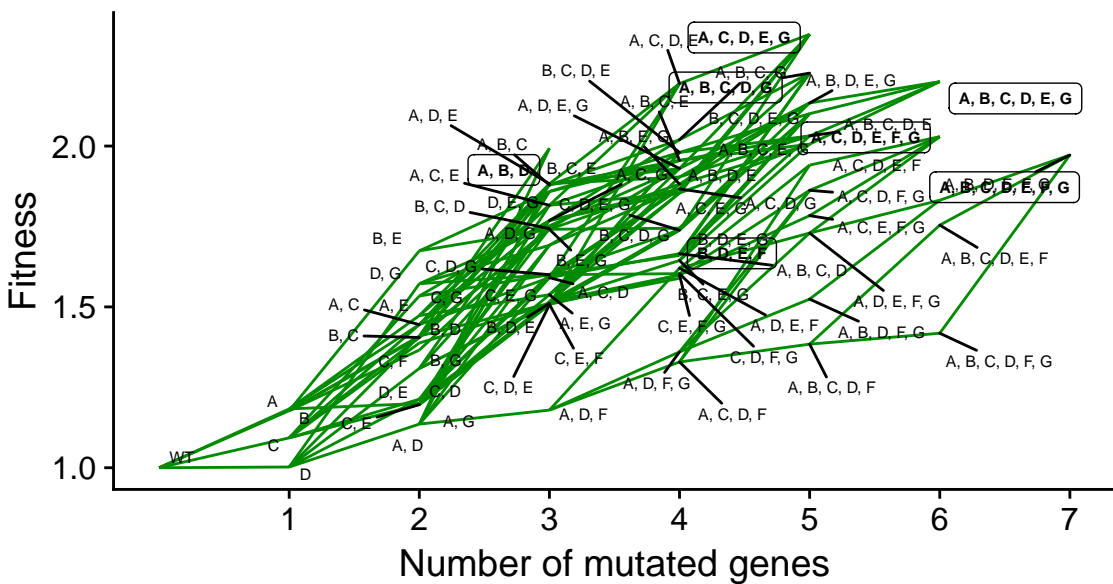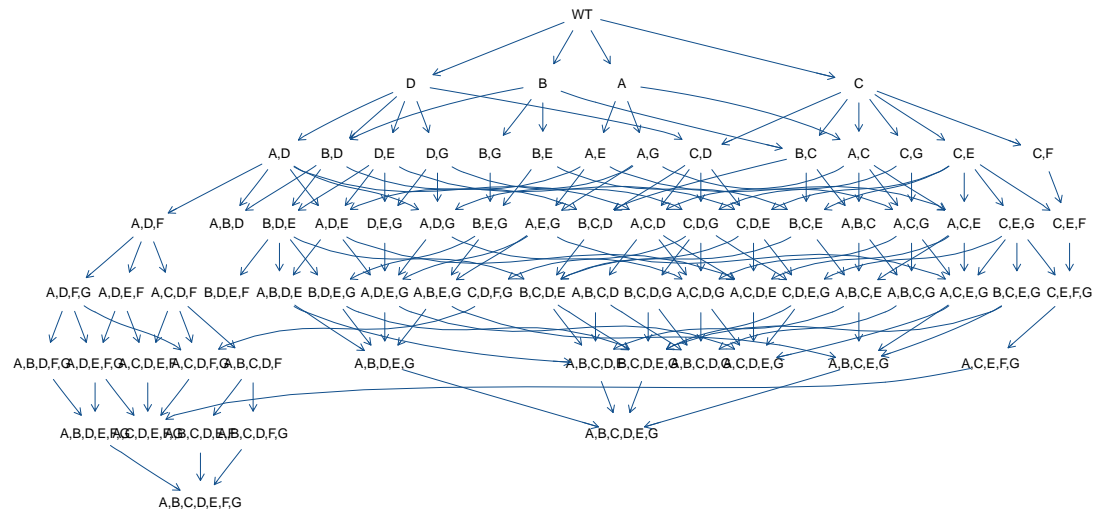

ID **kfB7NOK1J247FNsy**  
 acc genotypes **18**  
 peaks no back **8**  
 removed edges **NA**  
 prop rem edges **NA**

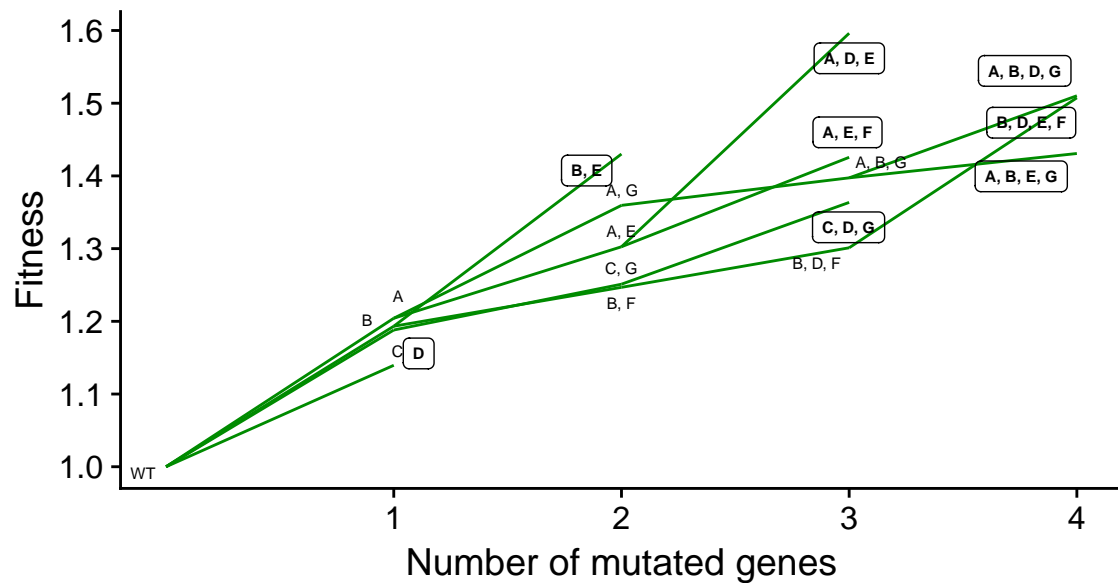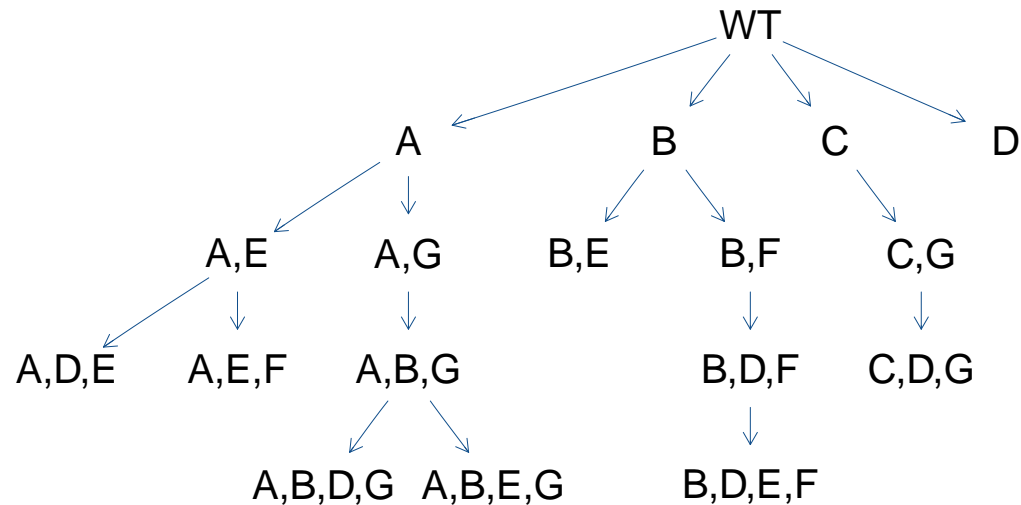



ID knzBi4rUYms1ZmCY  
 acc genotypes 57  
 peaks no back 20  
 removed edges NA  
 prop rem edges NA

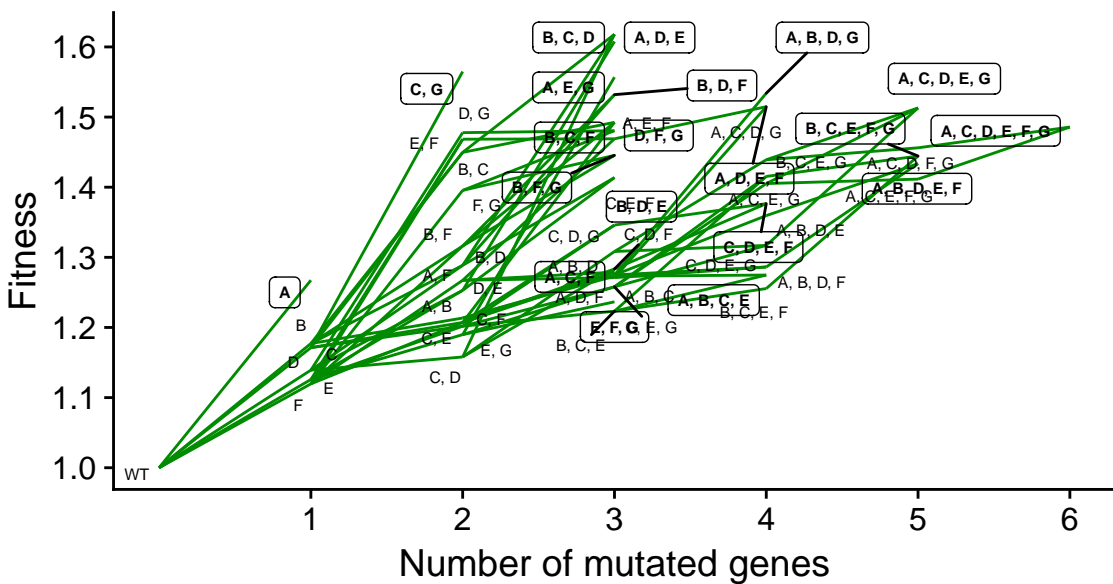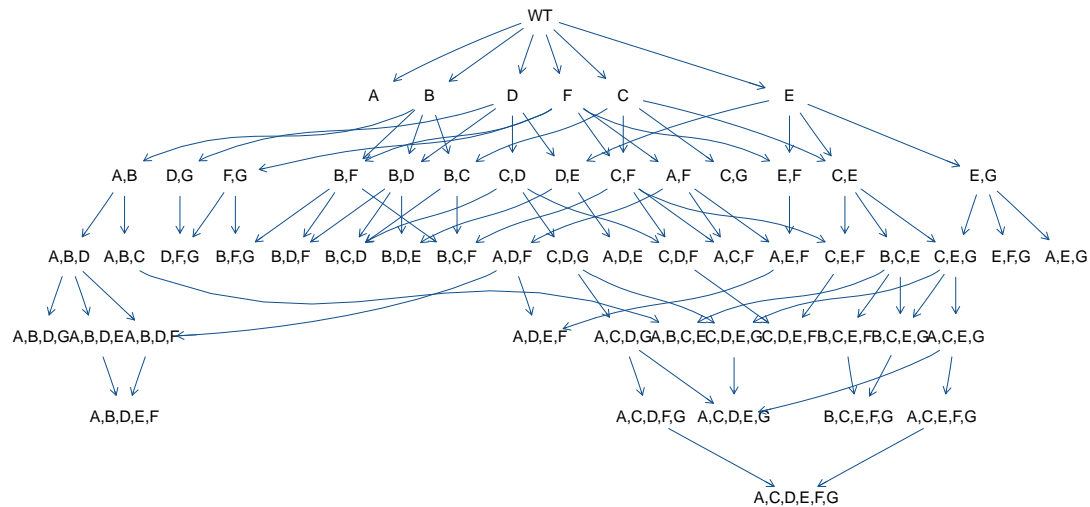

ID [KRI7SXjpurE910L5q](#)  
 acc genotypes 37  
 peaks no back 13  
 removed edges NA  
 prop rem edges NA

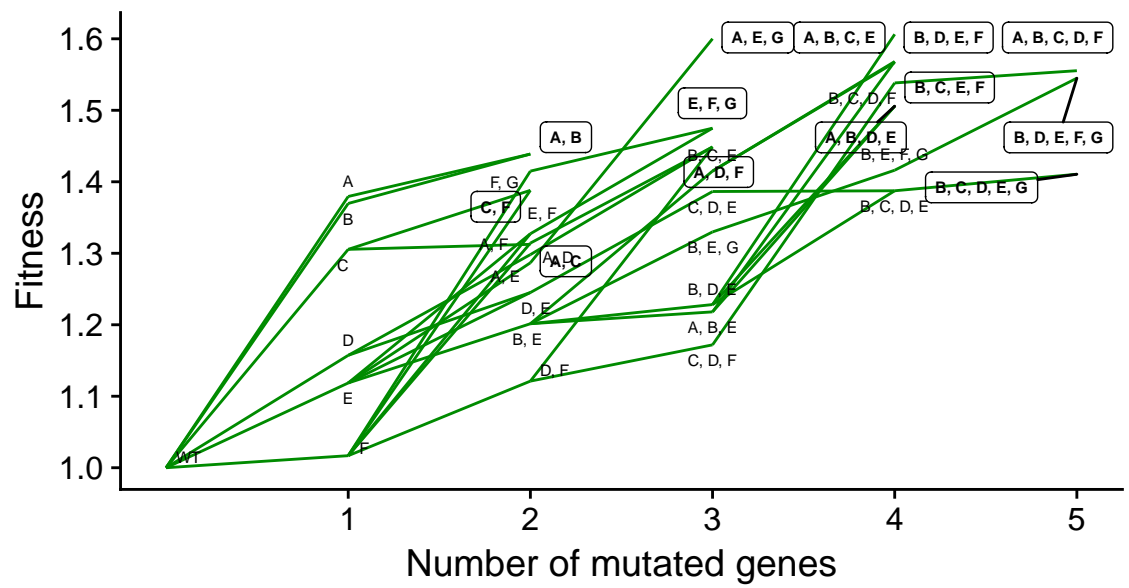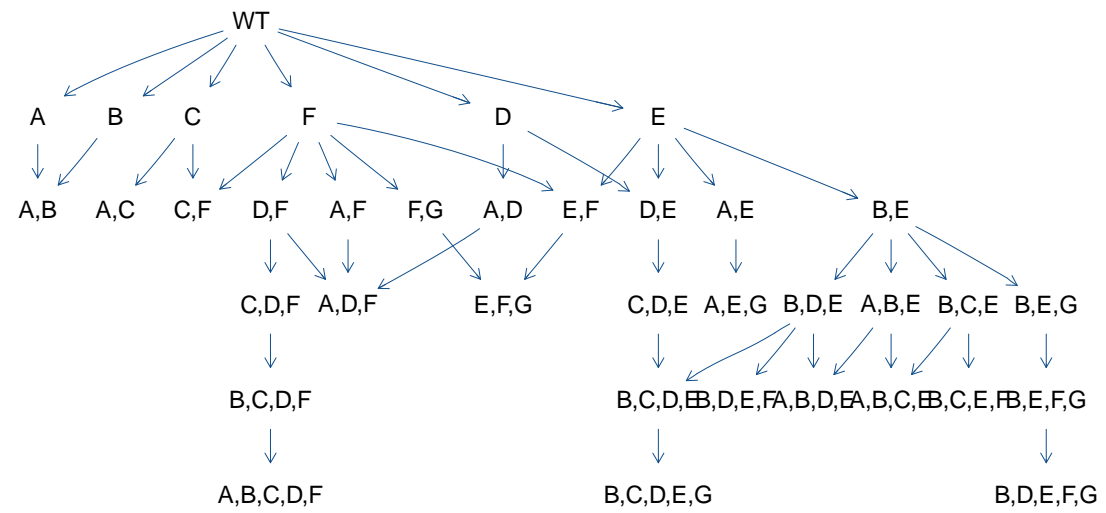

ID **KwdXNcrapMR7uPi7**  
 acc genotypes **31**  
 peaks no back **10**  
 removed edges **NA**  
 prop rem edges **NA**

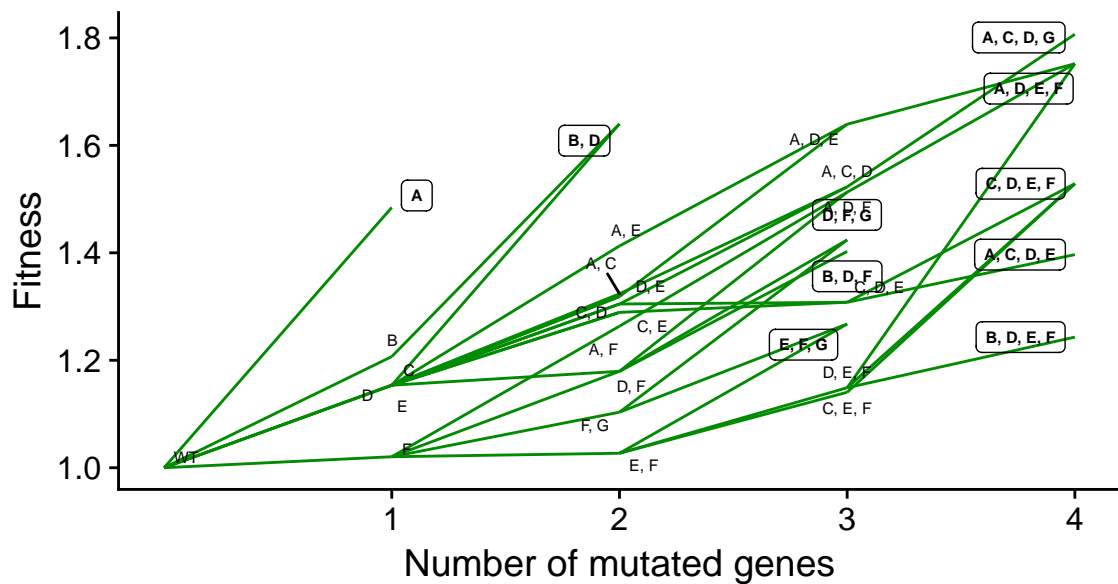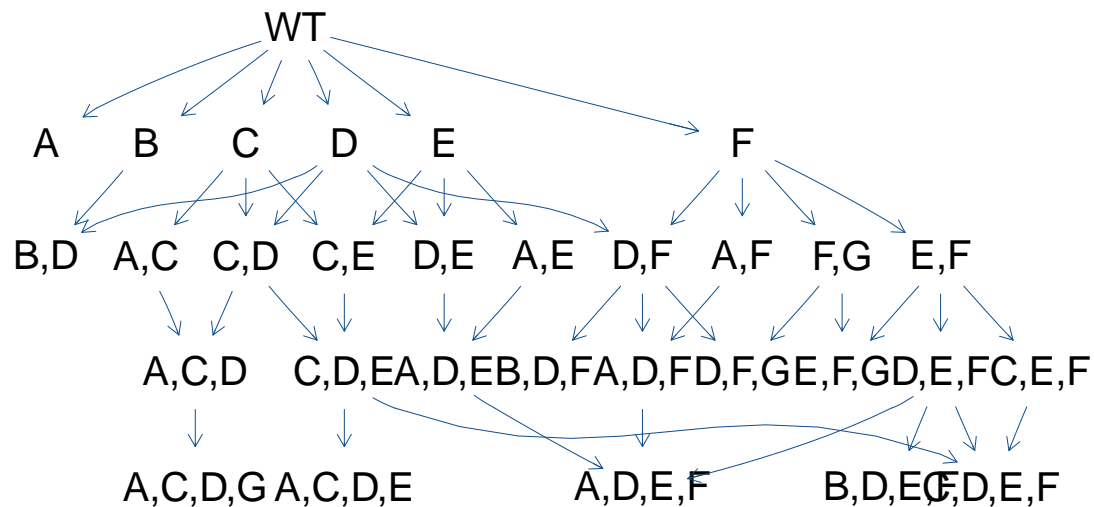

ID L53nf1rd3BsJMUlj  
 acc genotypes 53  
 peaks no back 20  
 removed edges NA  
 prop rem edges NA

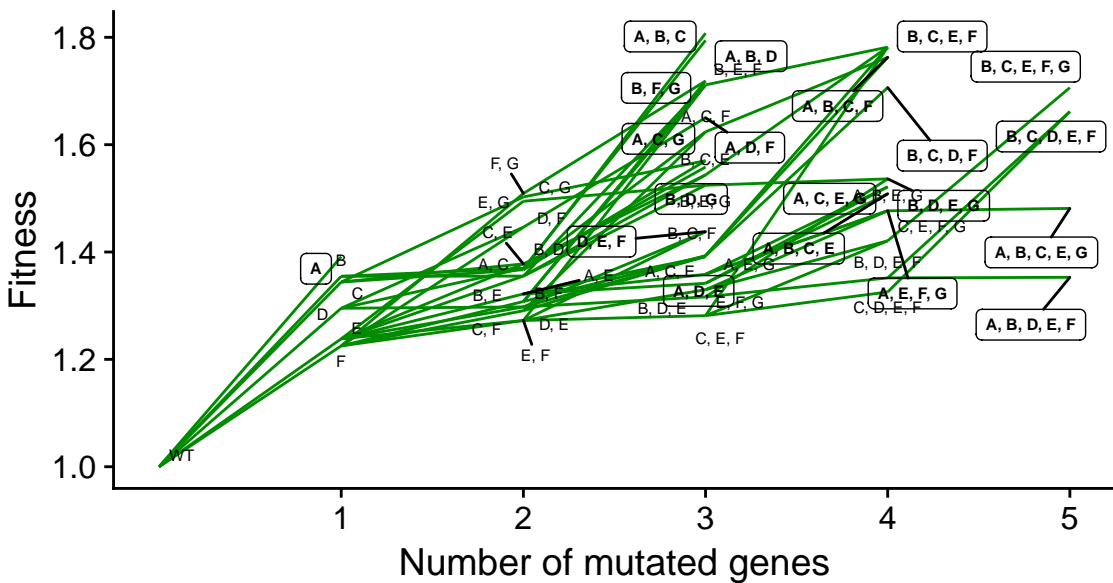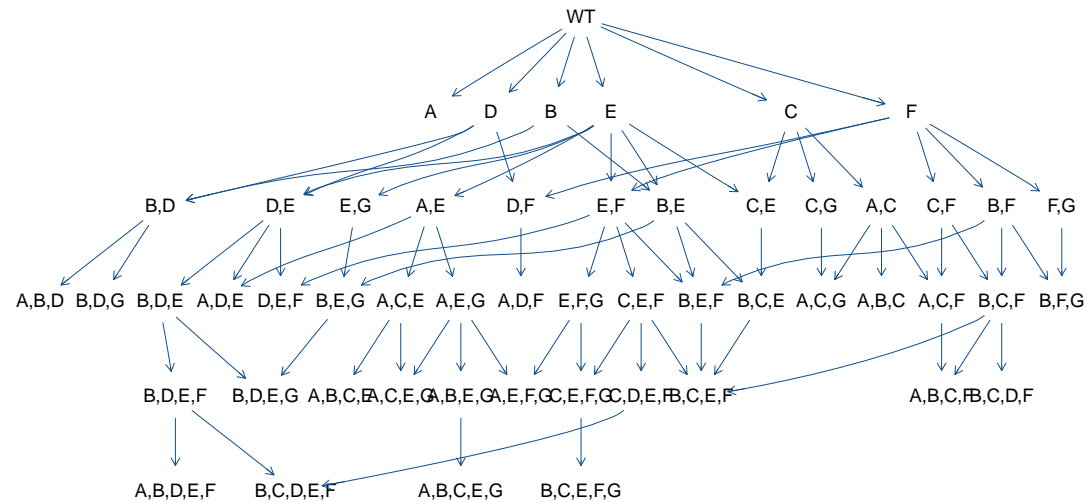



ID L96VgnsLK11UgcXs  
 acc genotypes 29  
 peaks no back 10  
 removed edges NA  
 prop rem edges NA

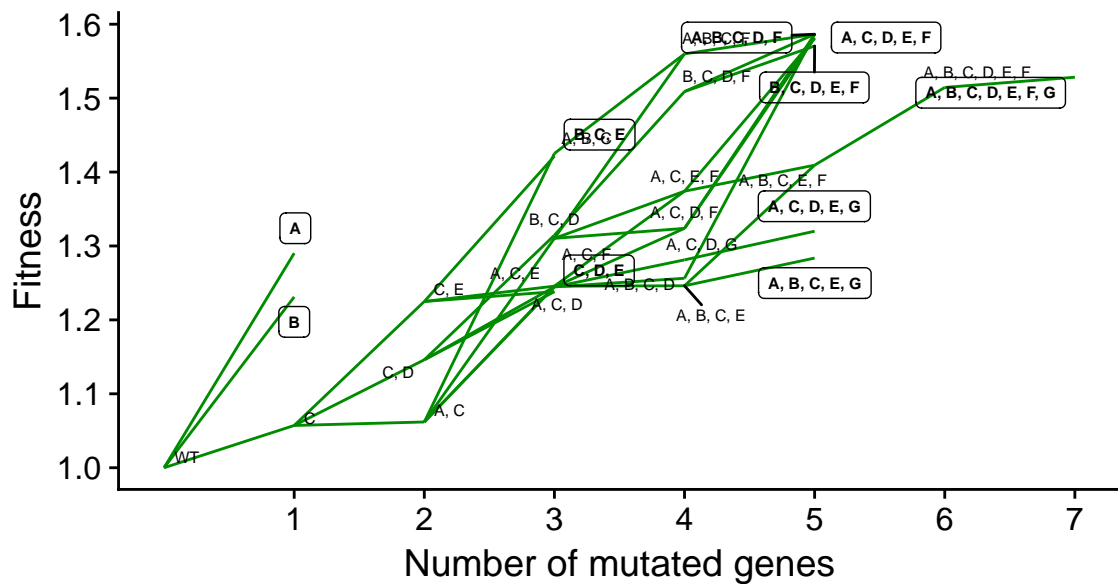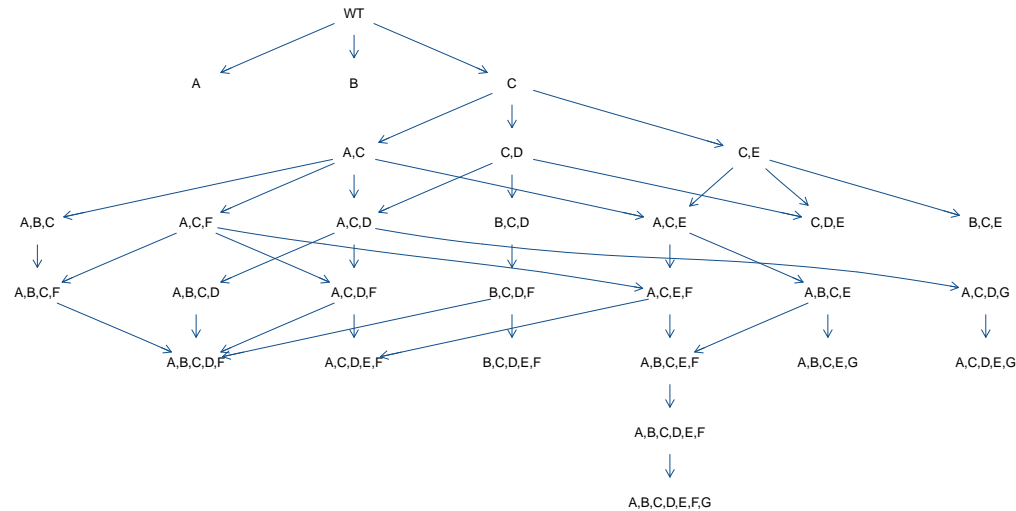

ID IG7VsdckSOB10Utw8  
 acc genotypes 40  
 peaks no back 13  
 removed edges NA  
 prop rem edges NA

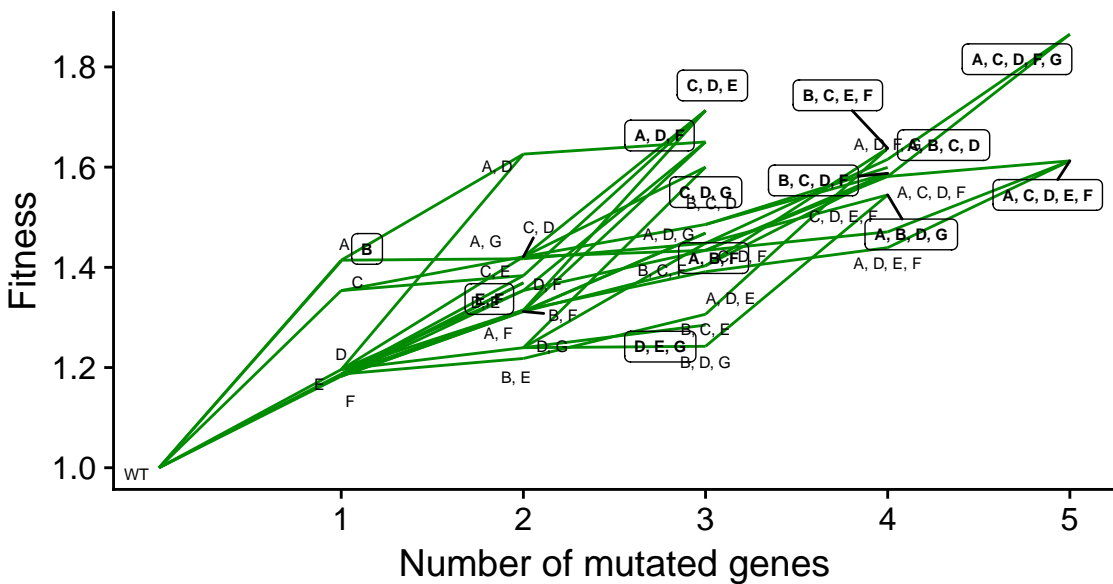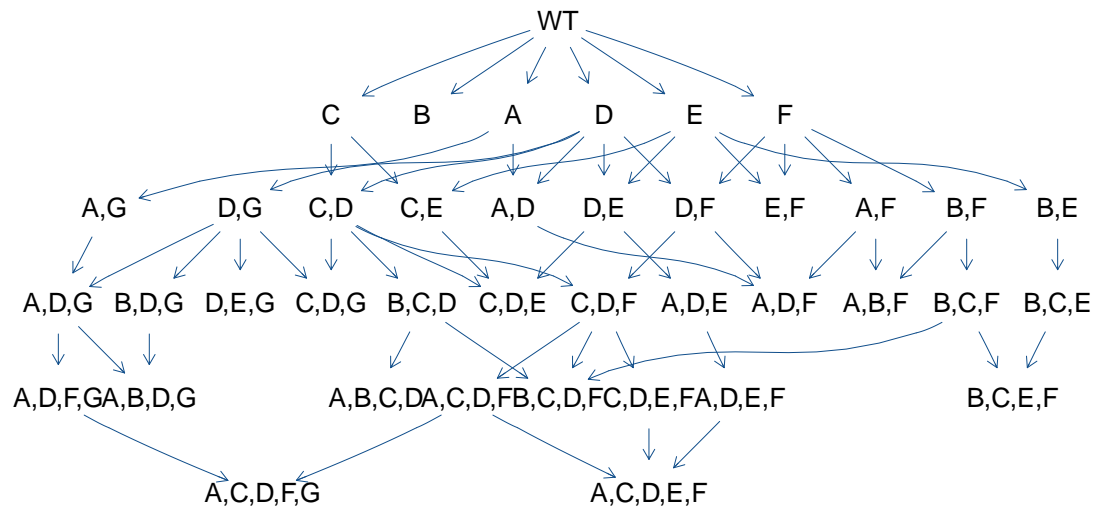

ID **LJ27j18rSPxKS2A9**  
 acc genotypes **52**  
 peaks no back **19**  
 removed edges **NA**  
 prop rem edges **NA**

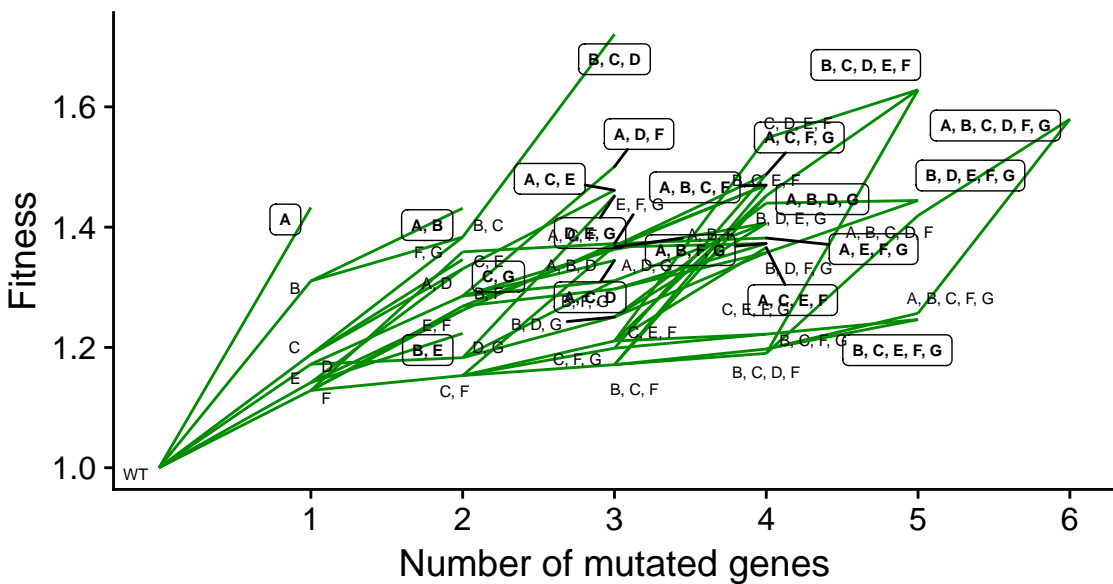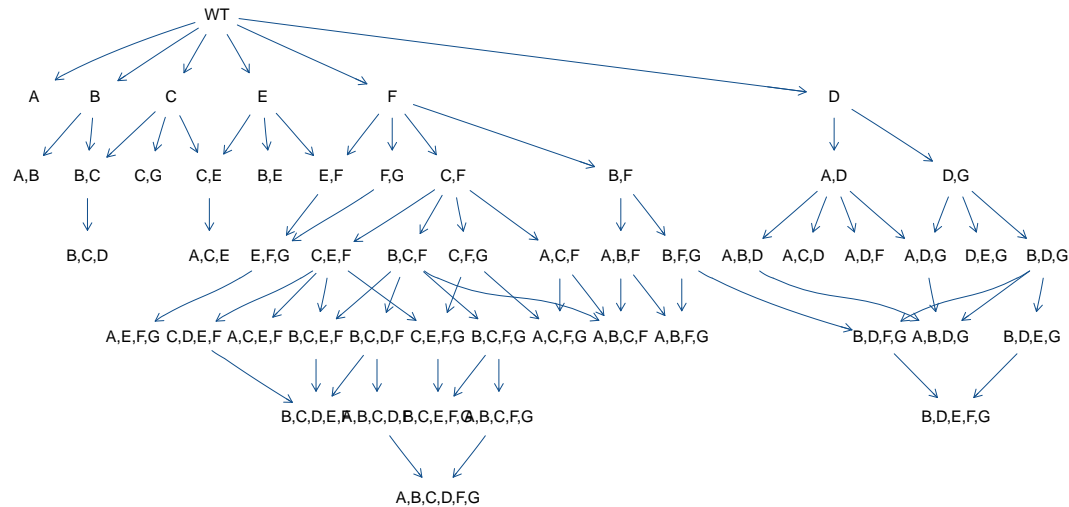

ID M19kX109AWS4IET93  
 acc genotypes 21  
 peaks no back 10  
 removed edges NA  
 prop rem edges NA

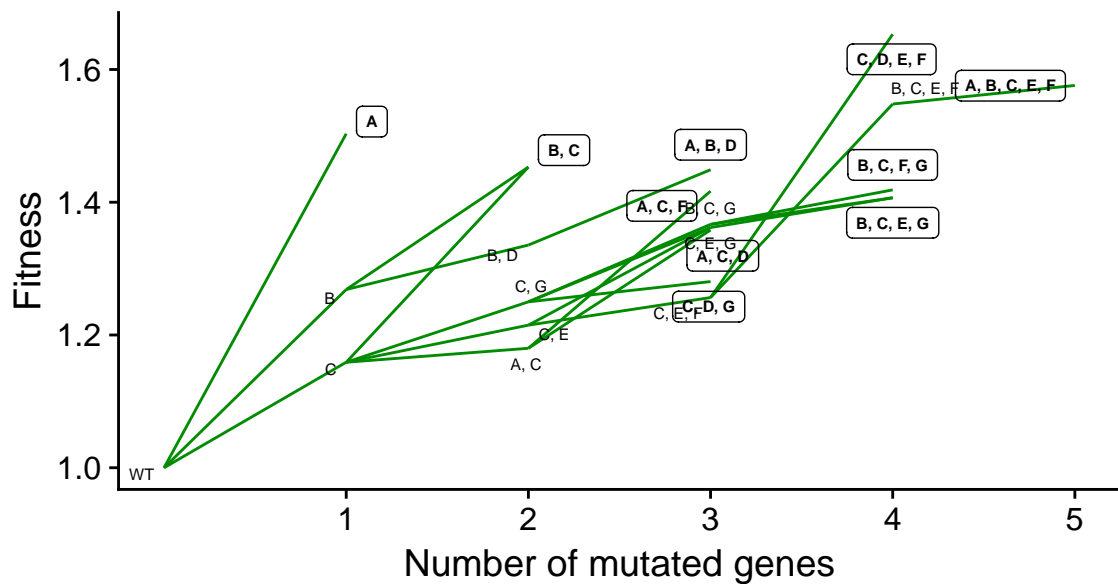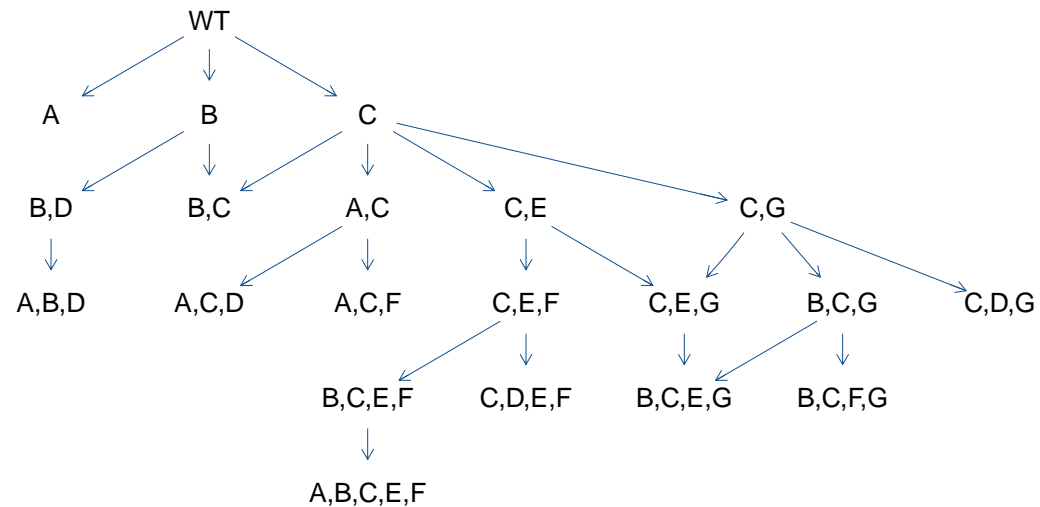

ID mBMwivnTLA1F1fOQ  
 acc genotypes 26  
 peaks no back 11  
 removed edges NA  
 prop rem edges NA

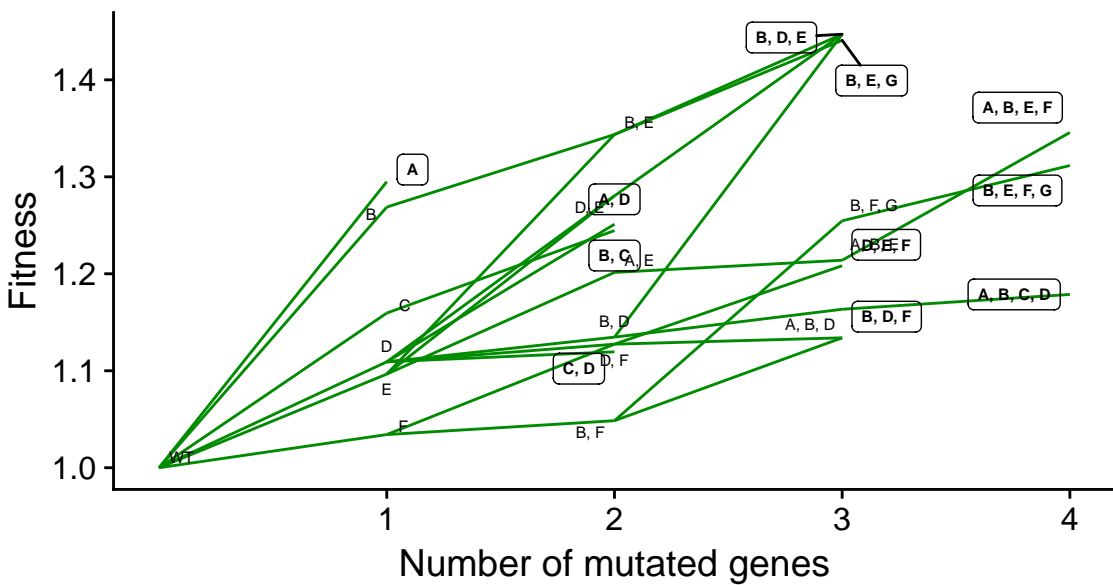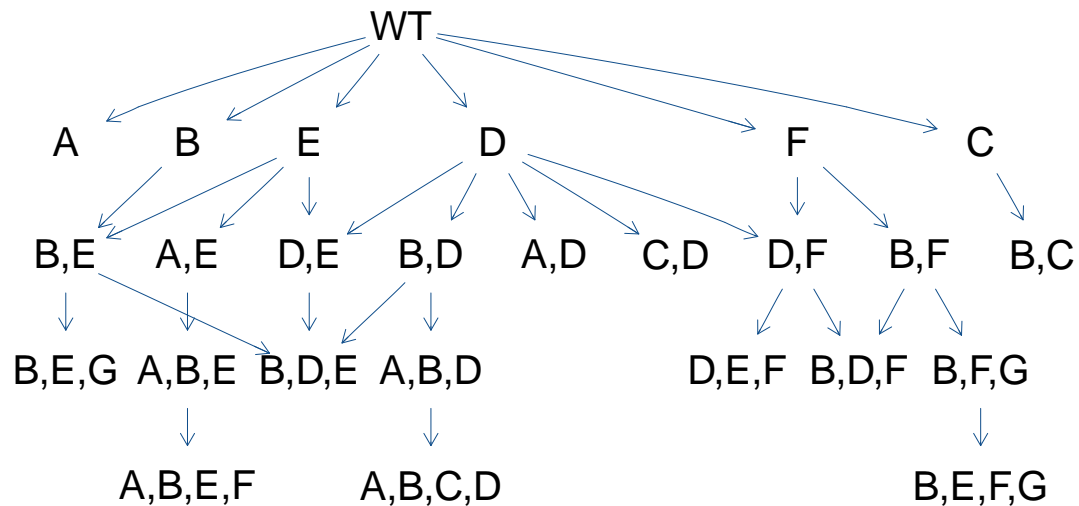

ID **MPJBgvRZOA1Xp4SQ**  
 acc genotypes **53**  
 peaks no back **19**  
 removed edges **NA**  
 prop rem edges **NA**

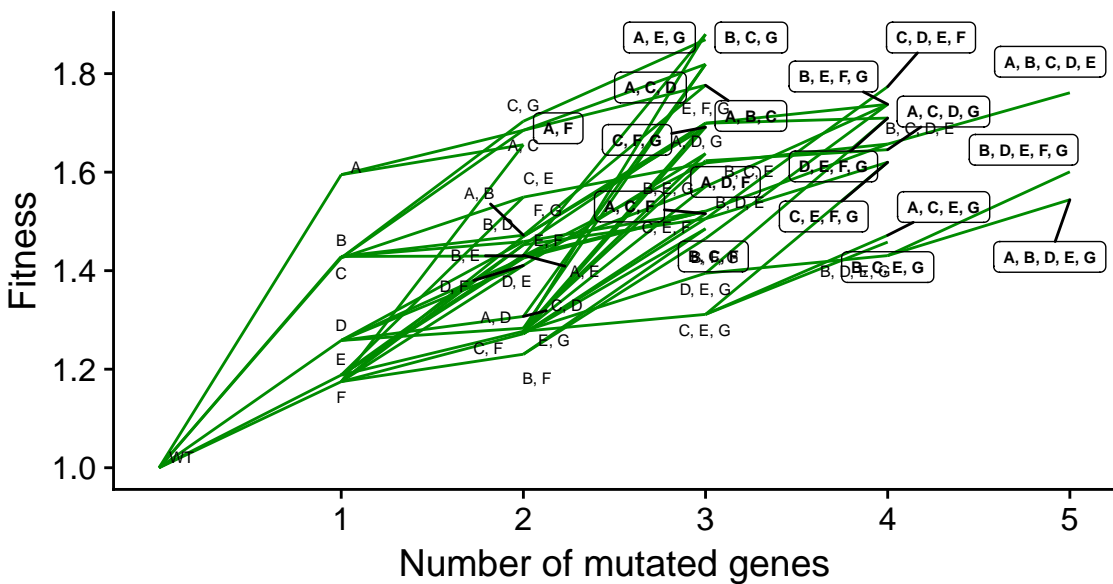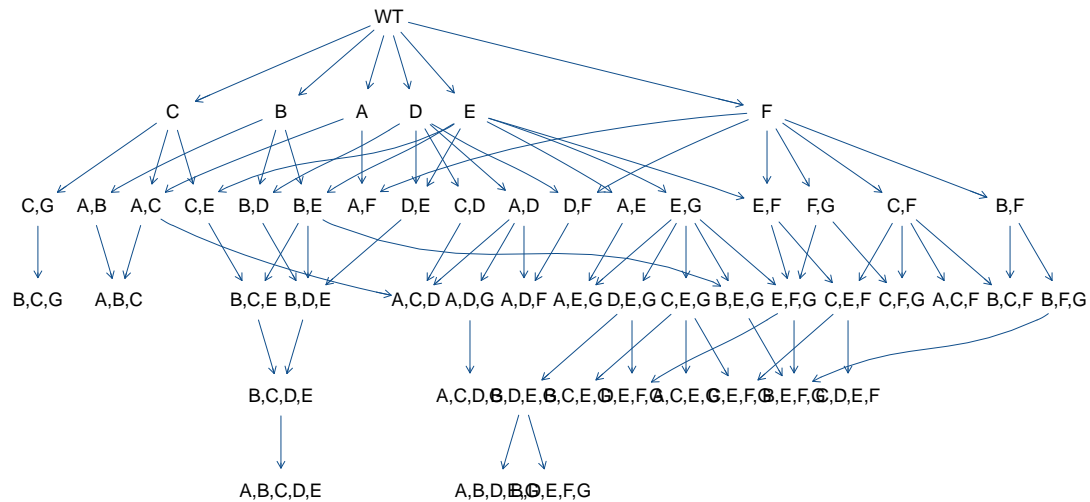

ID Mq3VEO6q8h6j5Q2K  
 acc genotypes 43  
 peaks no back 17  
 removed edges NA  
 prop rem edges NA

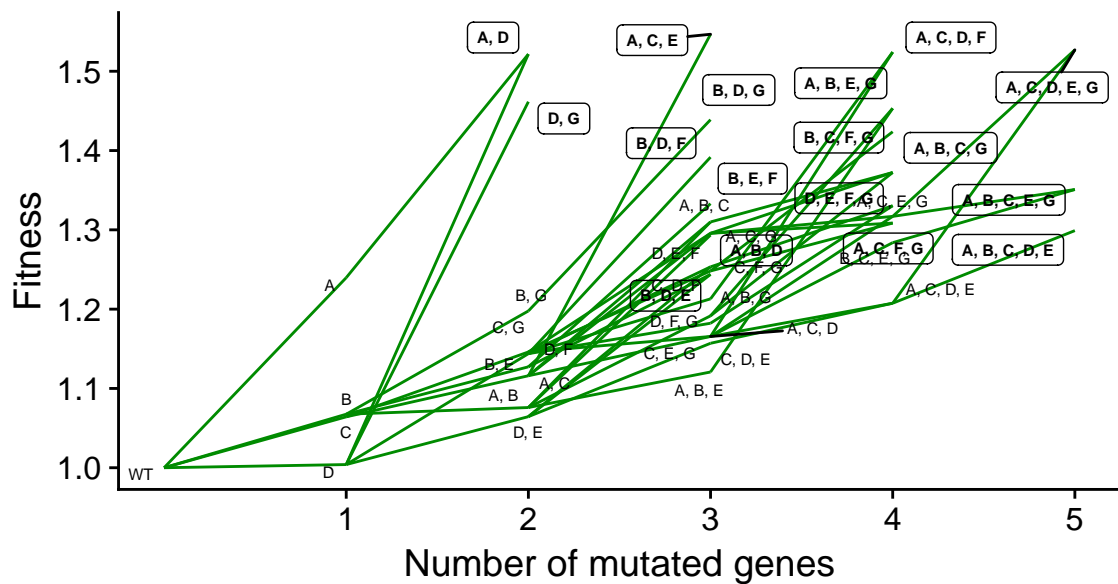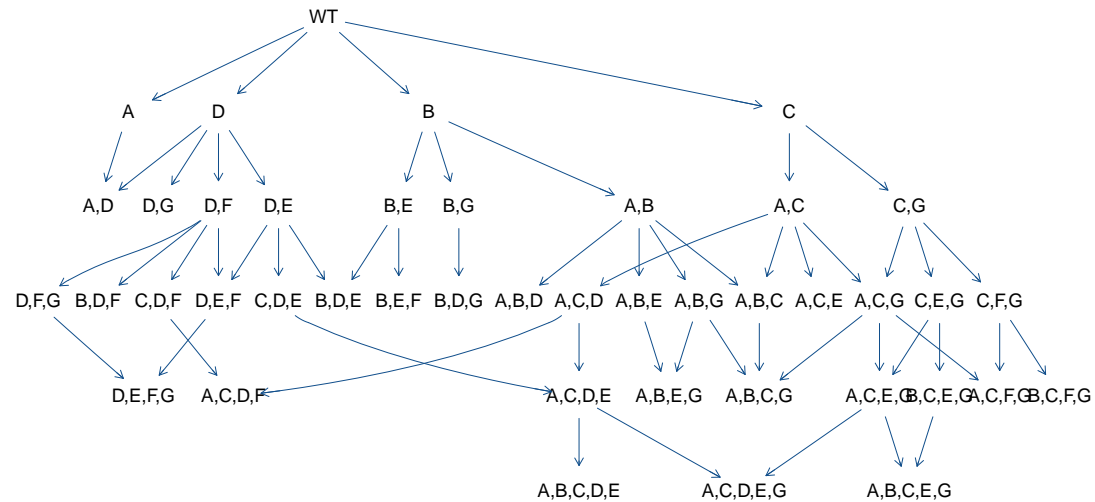

ID mrmstEuzwuukXnli  
 acc genotypes 64  
 peaks no back 18  
 removed edges NA  
 prop rem edges NA

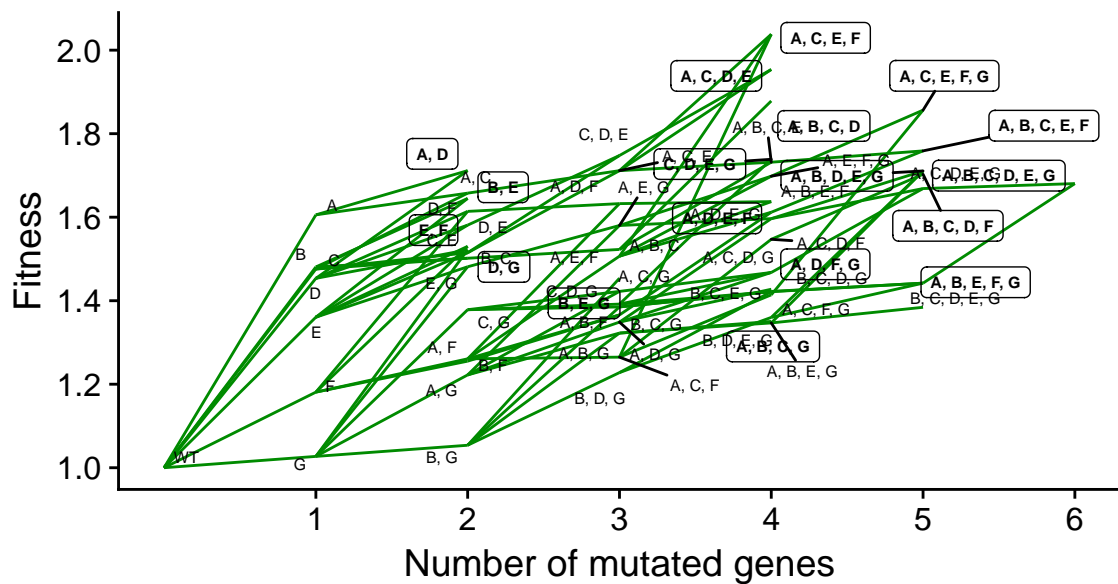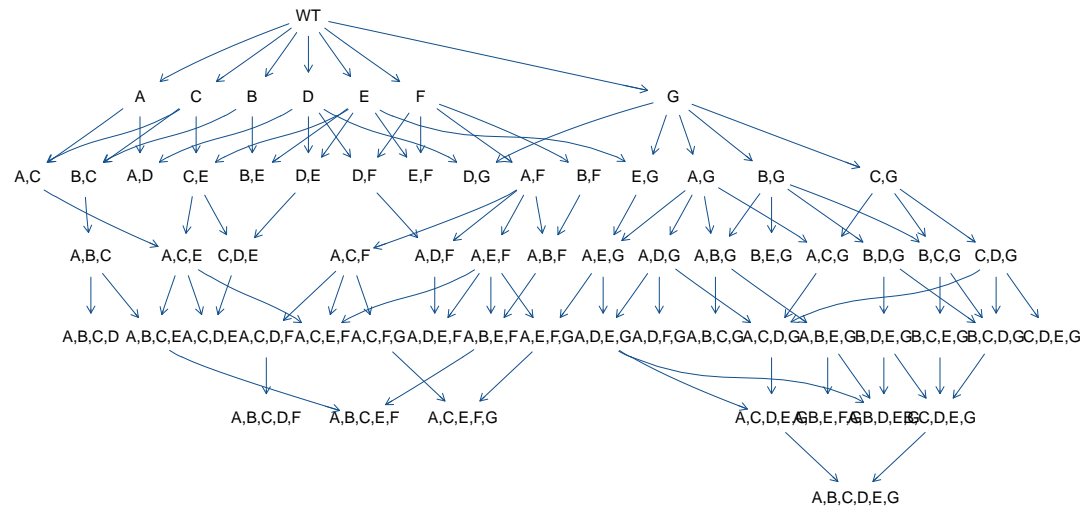



ID **mTWr1XzBqvHzZVjW**  
 acc genotypes **63**  
 peaks no back **22**  
 removed edges **NA**  
 prop rem edges **NA**

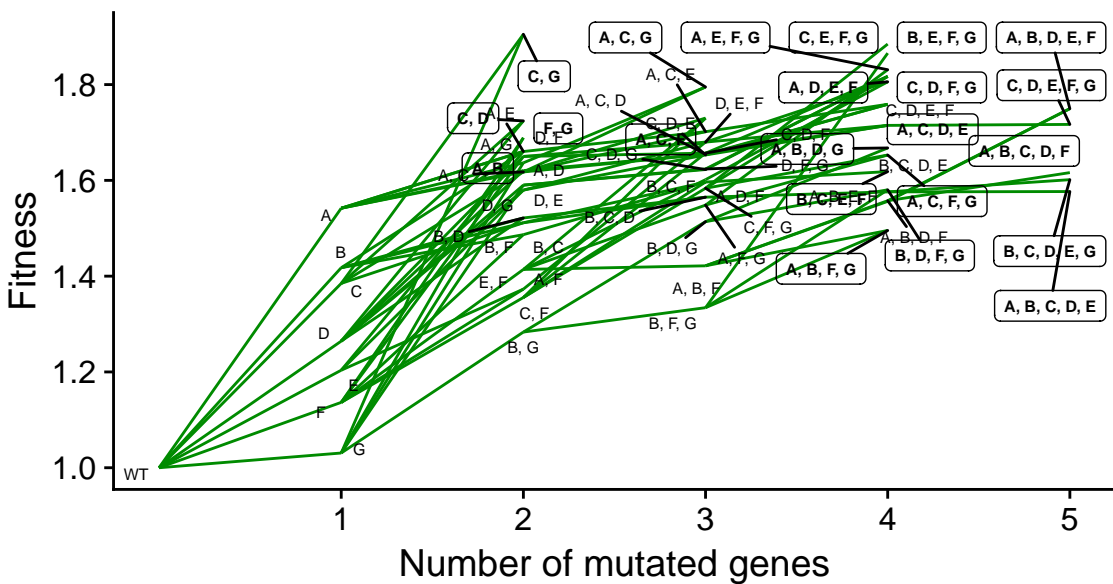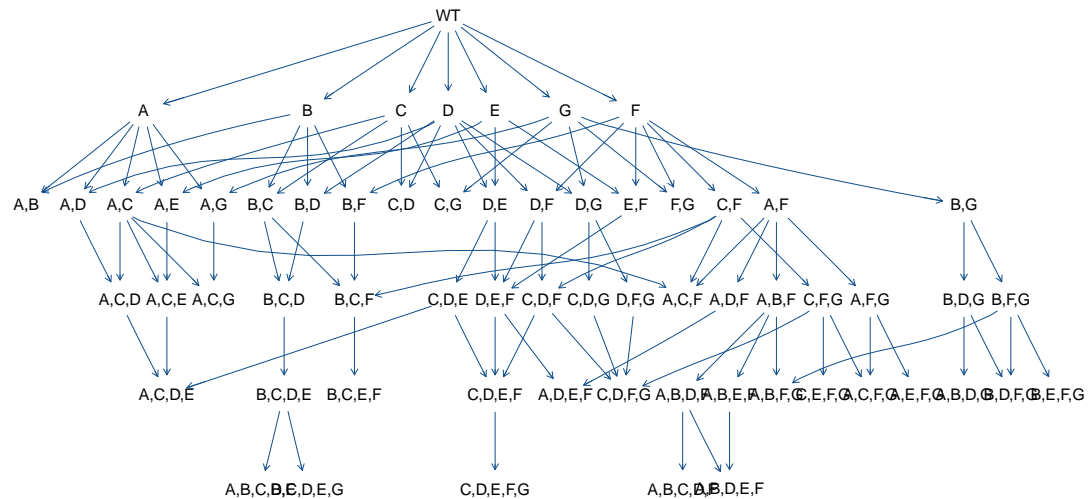

ID mwHTaW8c10WKVxeLt  
 acc genotypes 71  
 peaks no back 22  
 removed edges NA  
 prop rem edges NA

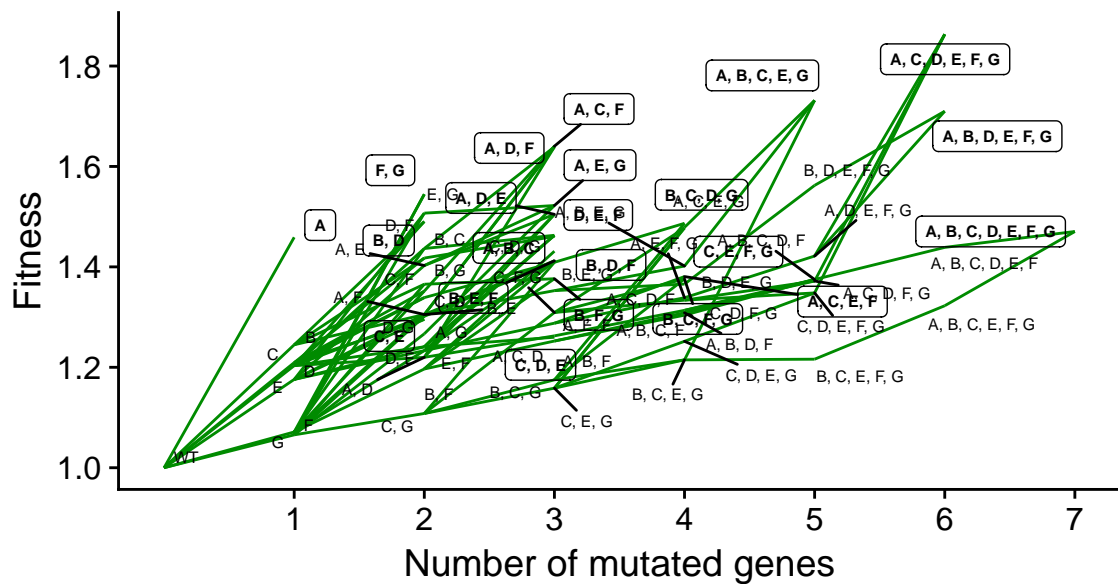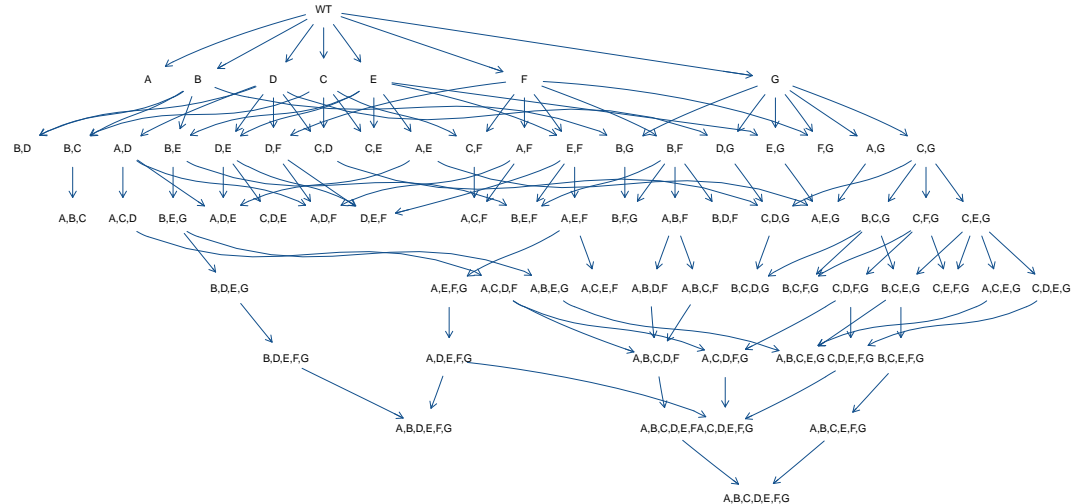



ID **NejgQ4lbqE6syfEk**  
 acc genotypes **60**  
 peaks no back **22**  
 removed edges **NA**  
 prop rem edges **NA**

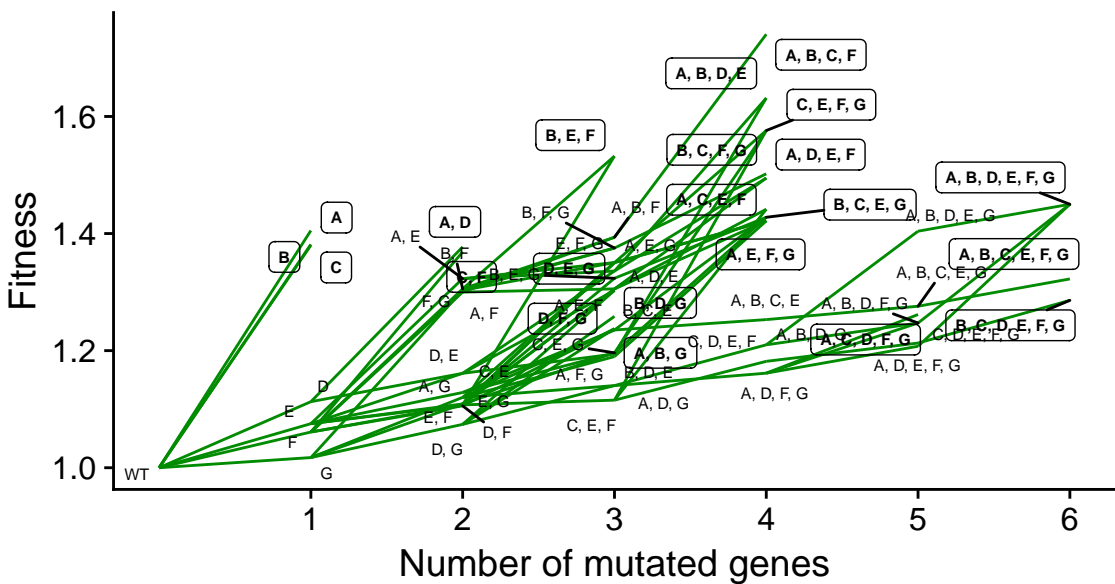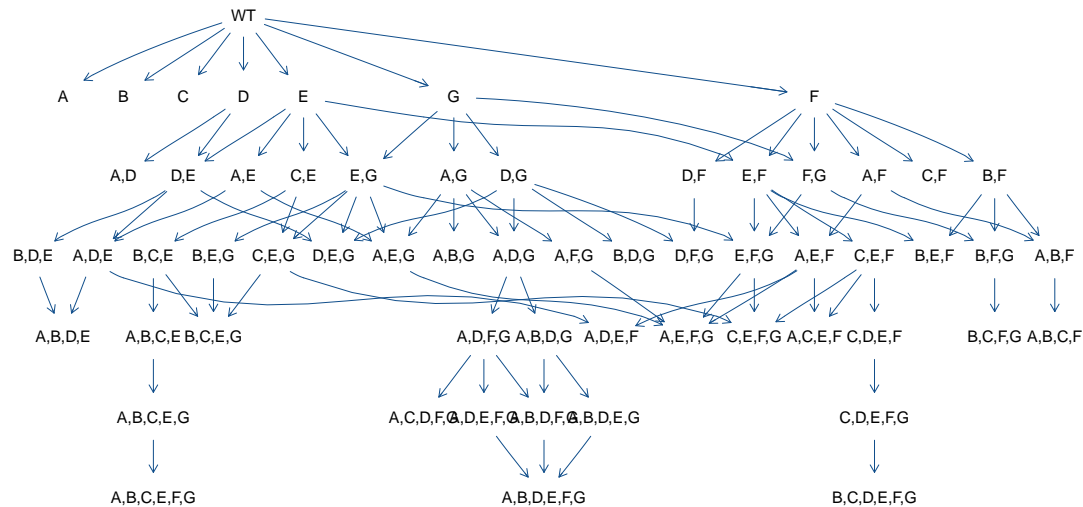



ID NLcu10ZEMImemfBBs  
 acc genotypes 32  
 peaks no back 14  
 removed edges NA  
 prop rem edges NA

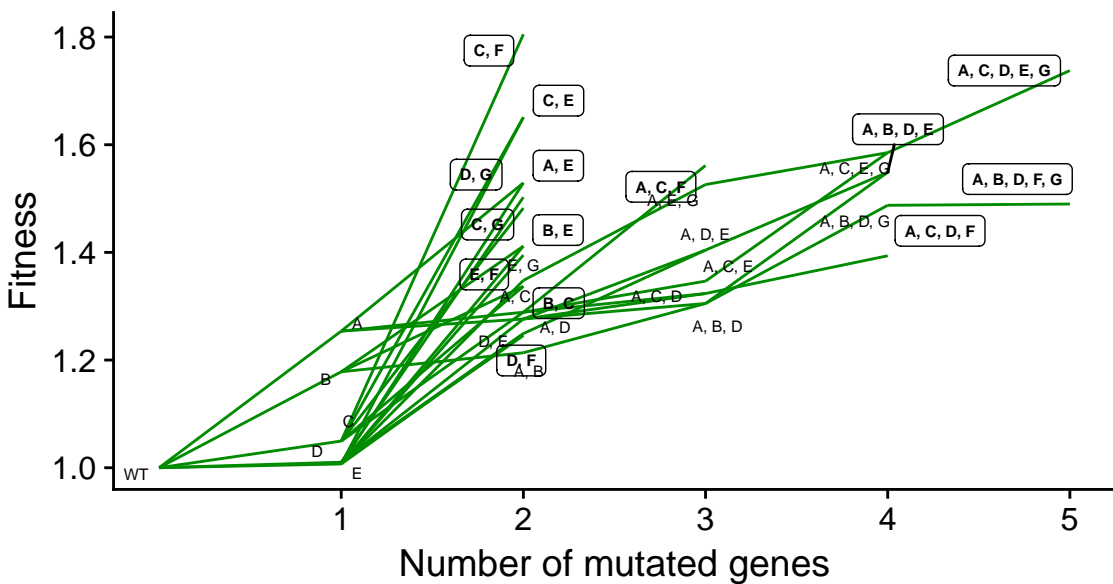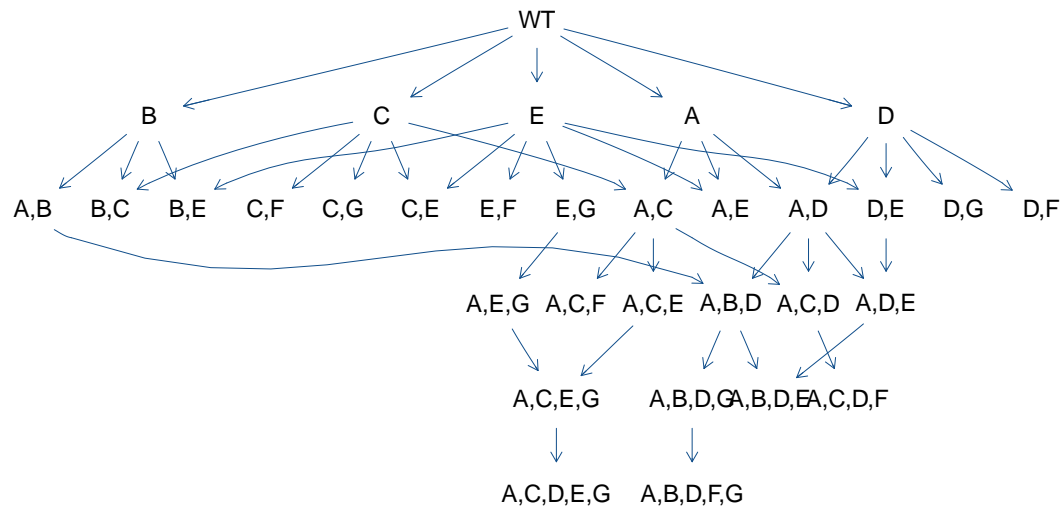

ID nlx10k3xX8bswraYG  
 acc genotypes 19  
 peaks no back 5  
 removed edges NA  
 prop rem edges NA

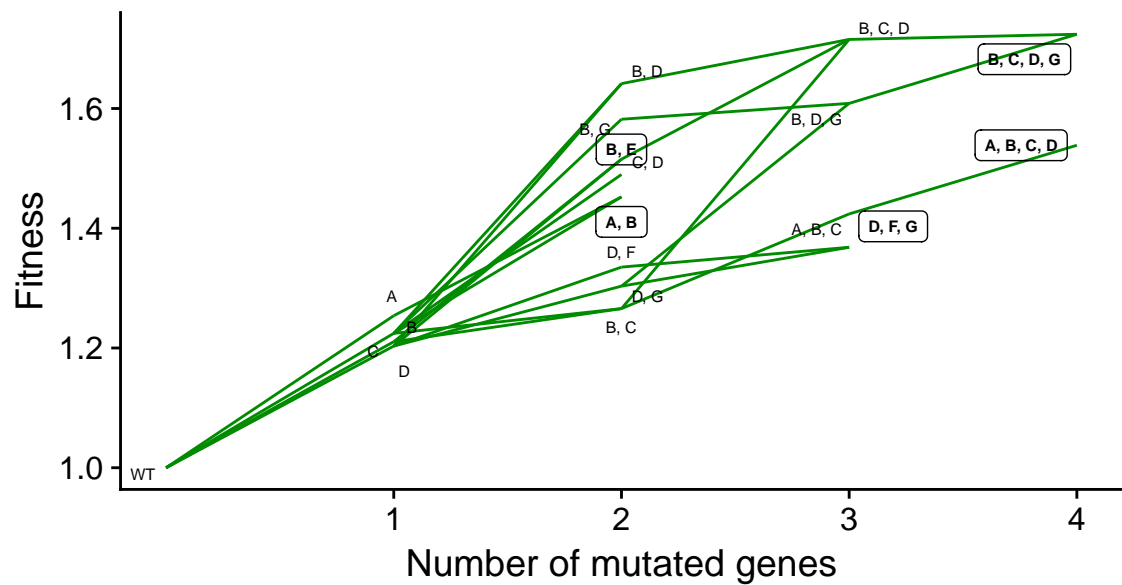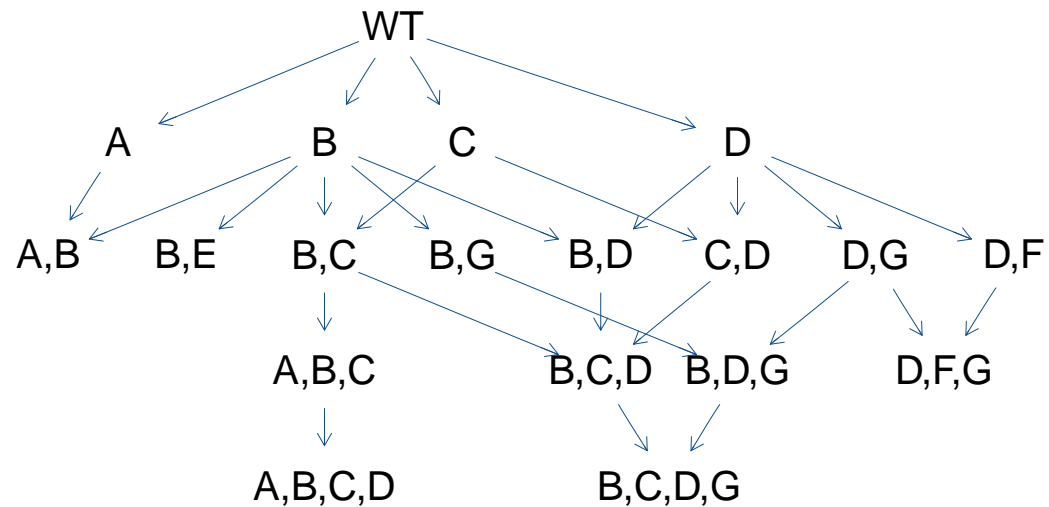

ID Nq9C7m8MciTio614  
 acc genotypes 45  
 peaks no back 13  
 removed edges NA  
 prop rem edges NA

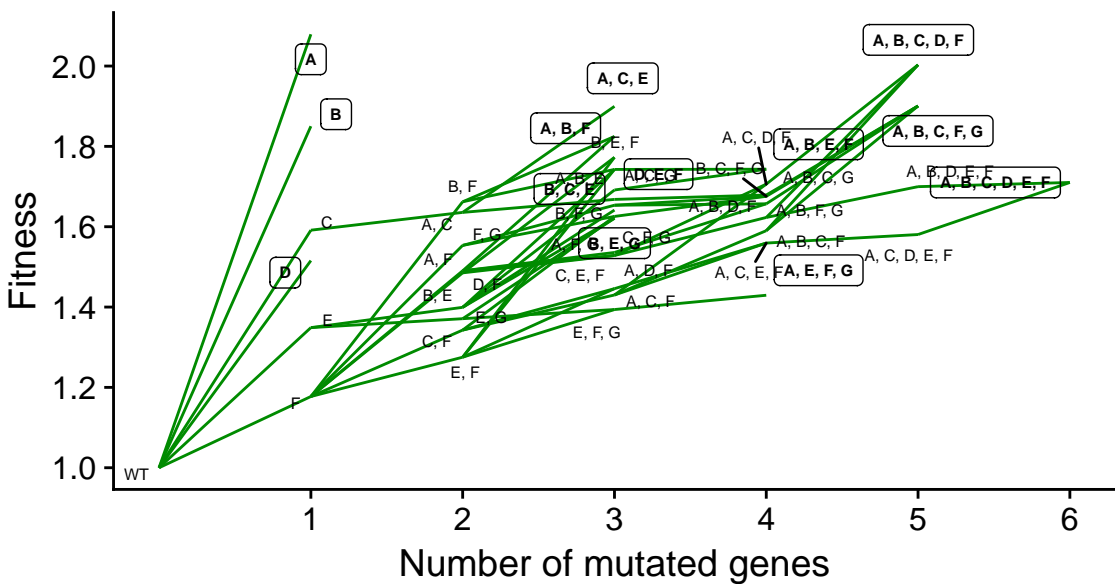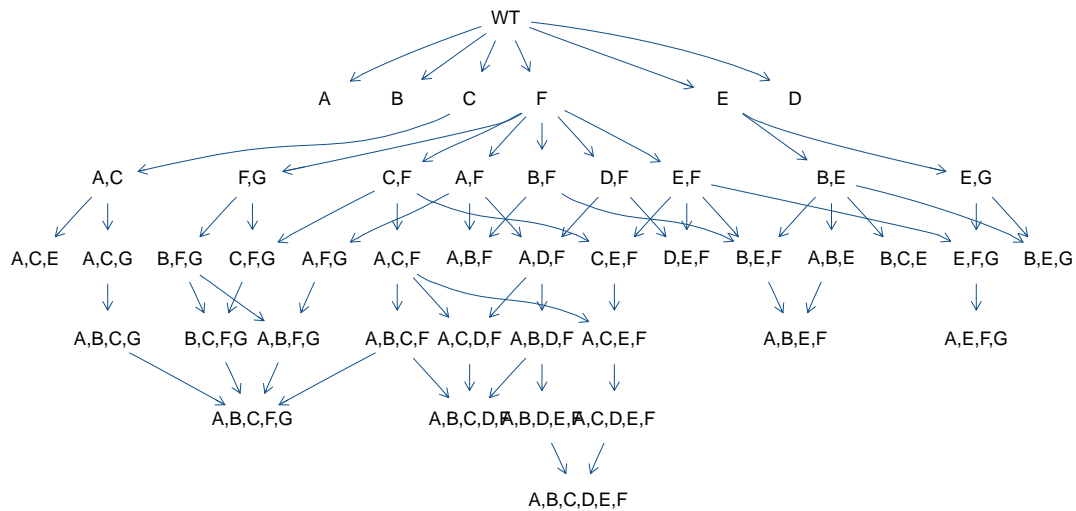



ID NuYHUmW2Daw10xoxW  
 acc genotypes 61  
 peaks no back 15  
 removed edges NA  
 prop rem edges NA

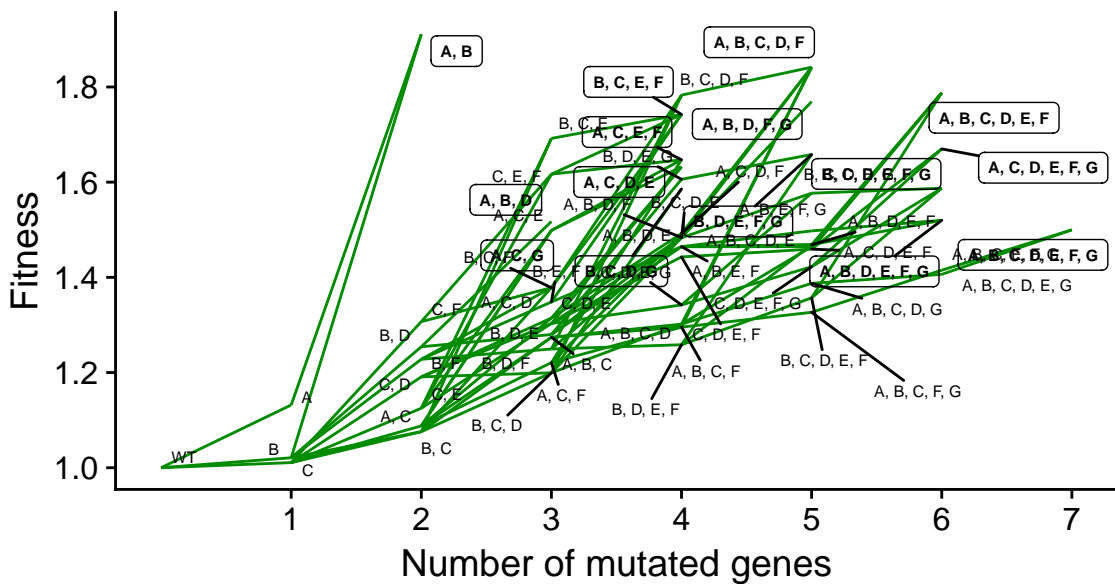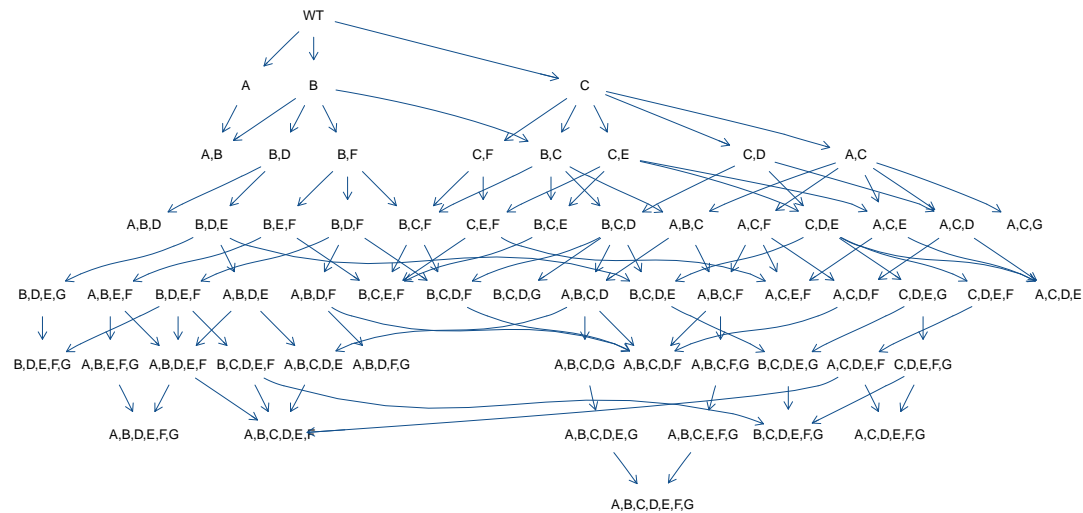

ID **nwLrclGueac4e3RH**  
 acc genotypes **57**  
 peaks no back **16**  
 removed edges **NA**  
 prop rem edges **NA**

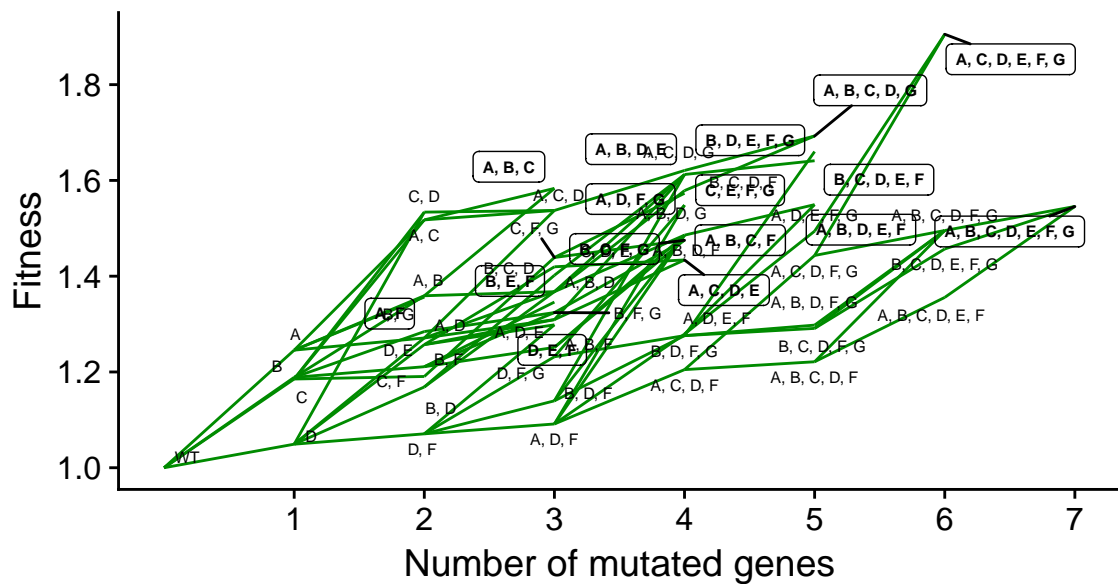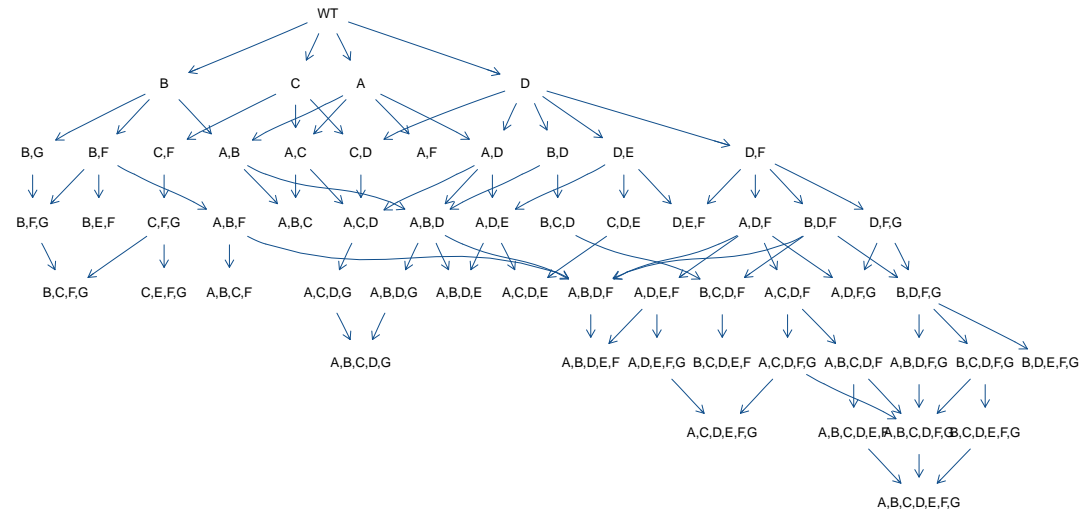

ID om3Pj5lphjvaQhAk  
 acc genotypes 82  
 peaks no back 27  
 removed edges NA  
 prop rem edges NA

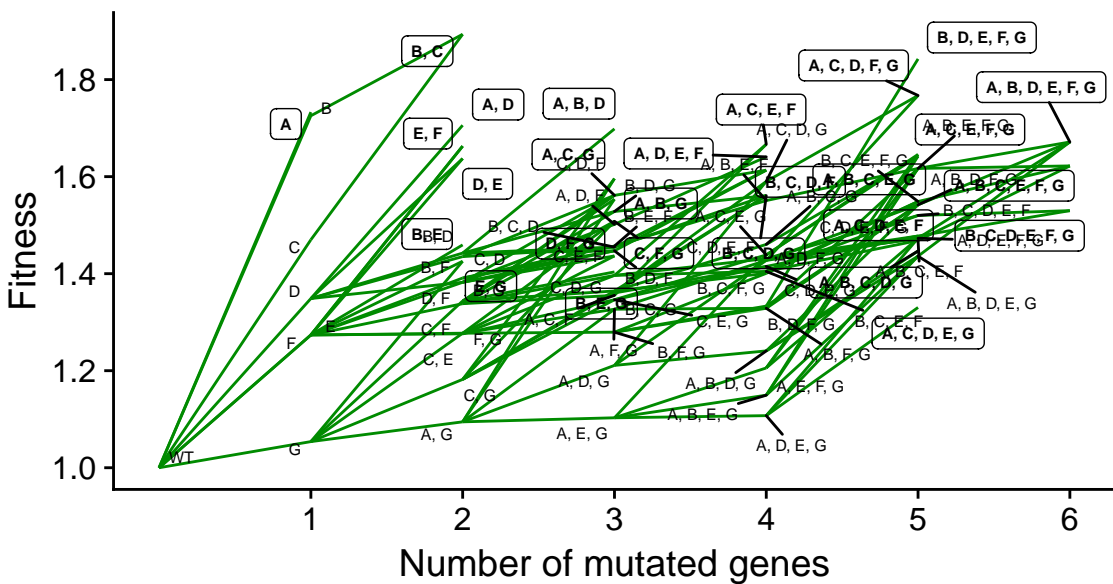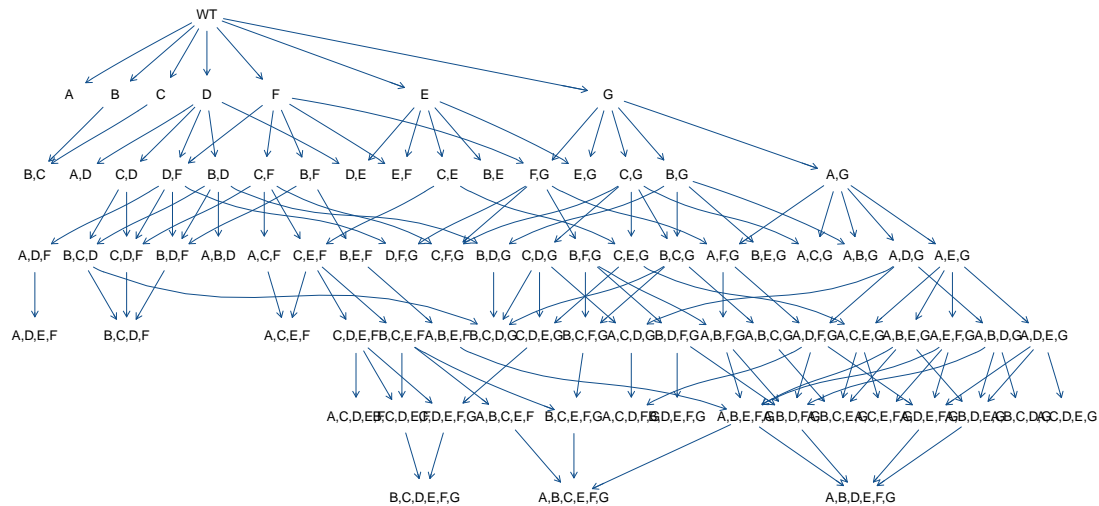



ID **ozA8bz3JzJBjMoZP**  
 acc genotypes **38**  
 peaks no back **11**  
 removed edges **NA**  
 prop rem edges **NA**

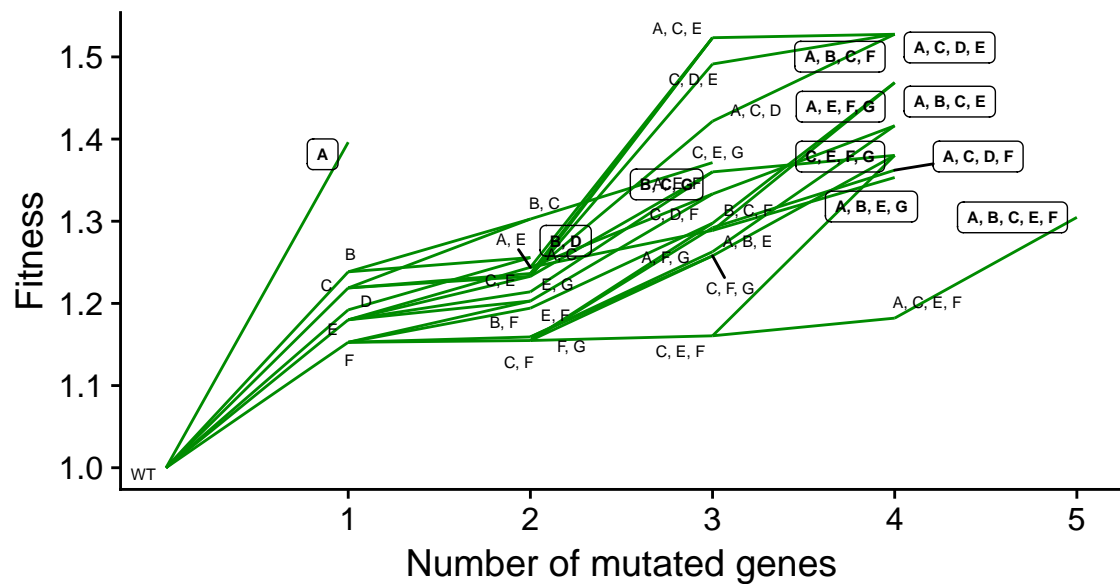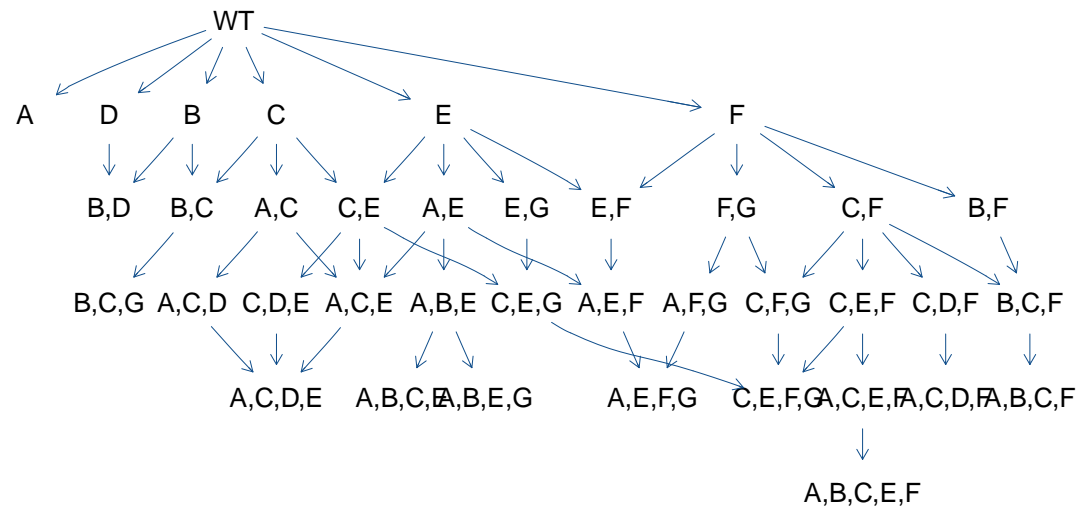

ID p2rZTfzQSZaEzk7D  
 acc genotypes 42  
 peaks no back 11  
 removed edges NA  
 prop rem edges NA

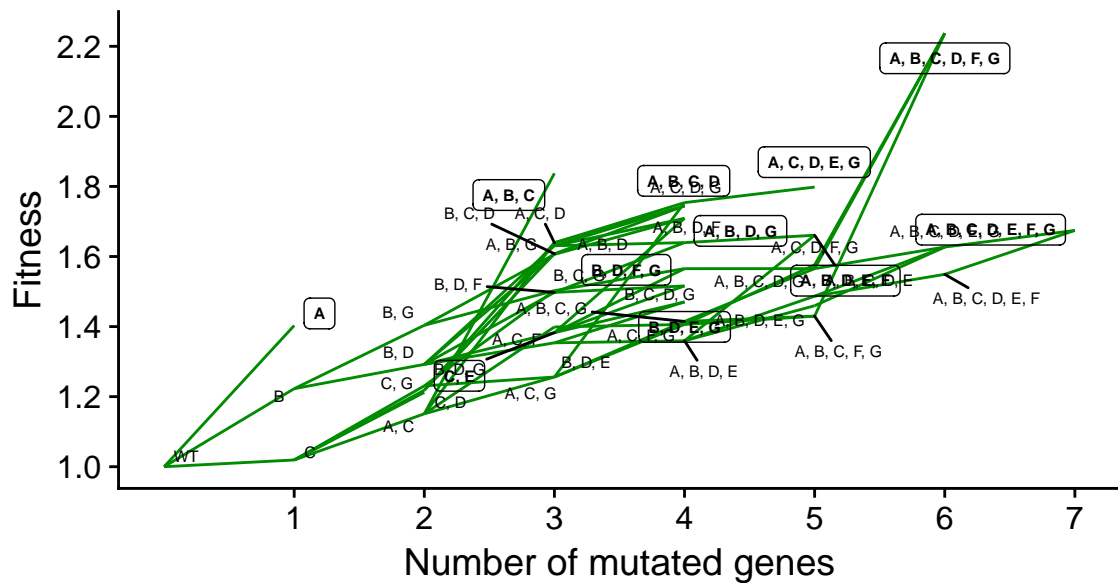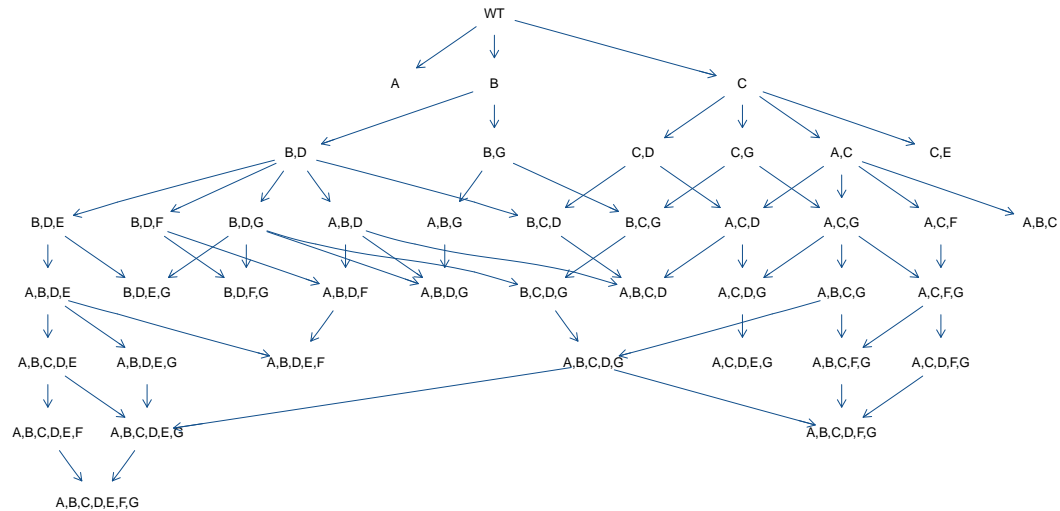

ID PdBS51bgDdPXdV8W  
 acc genotypes 33  
 peaks no back 10  
 removed edges NA  
 prop rem edges NA

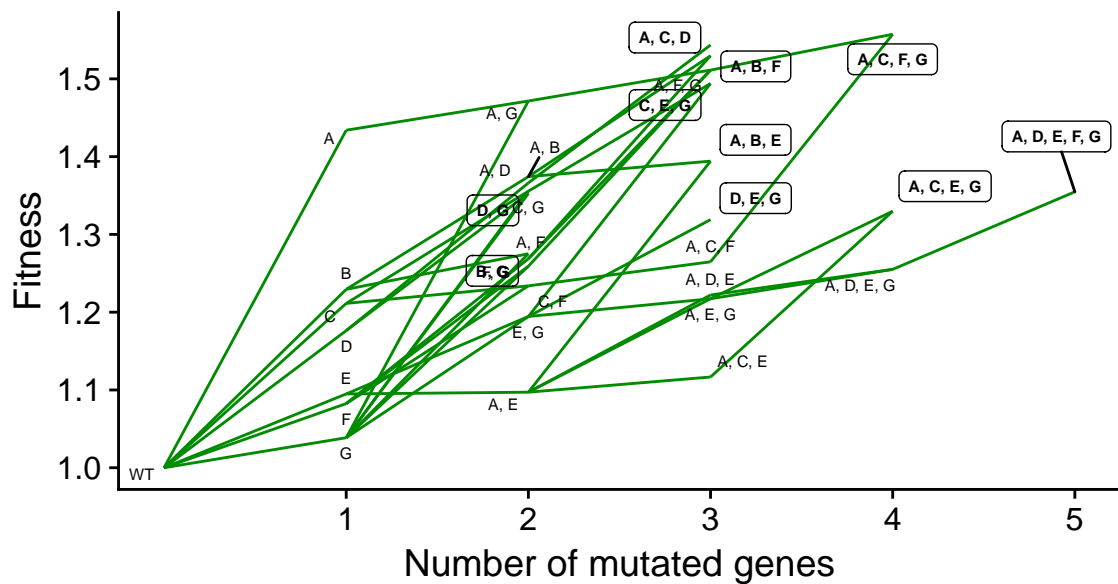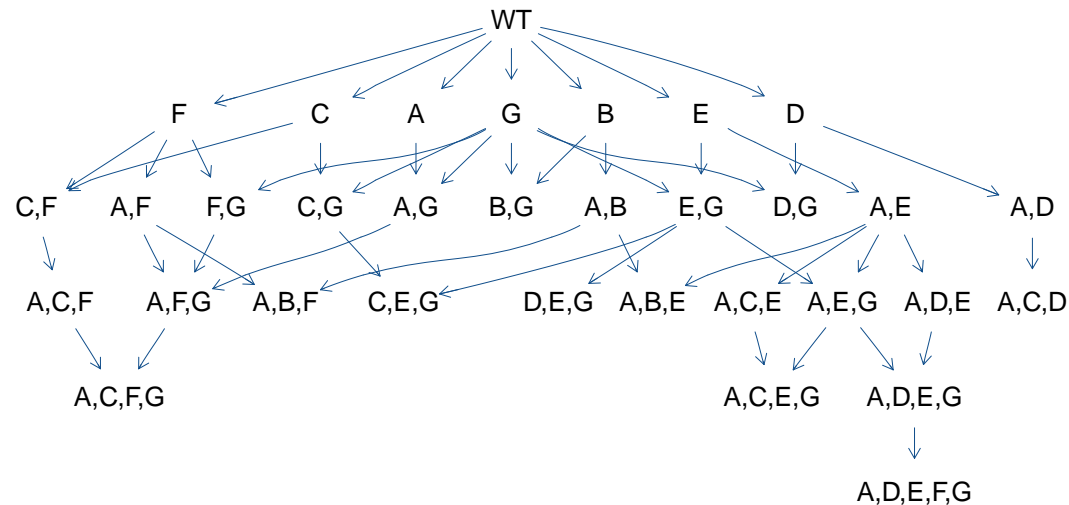





ID pdLy5HbulEcGMFw8  
 acc genotypes 39  
 peaks no back 12  
 removed edges NA  
 prop rem edges NA

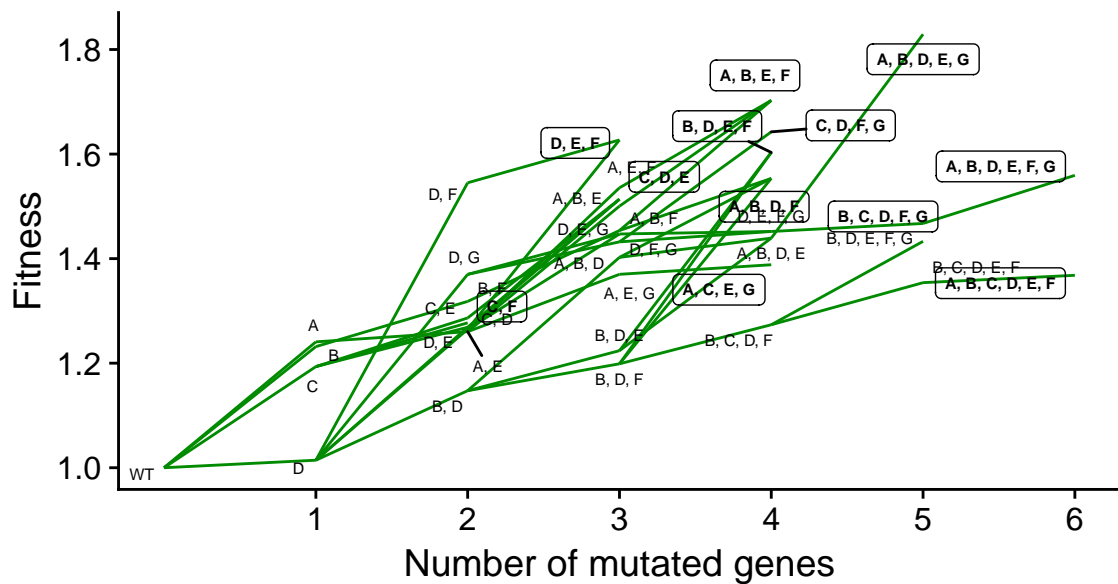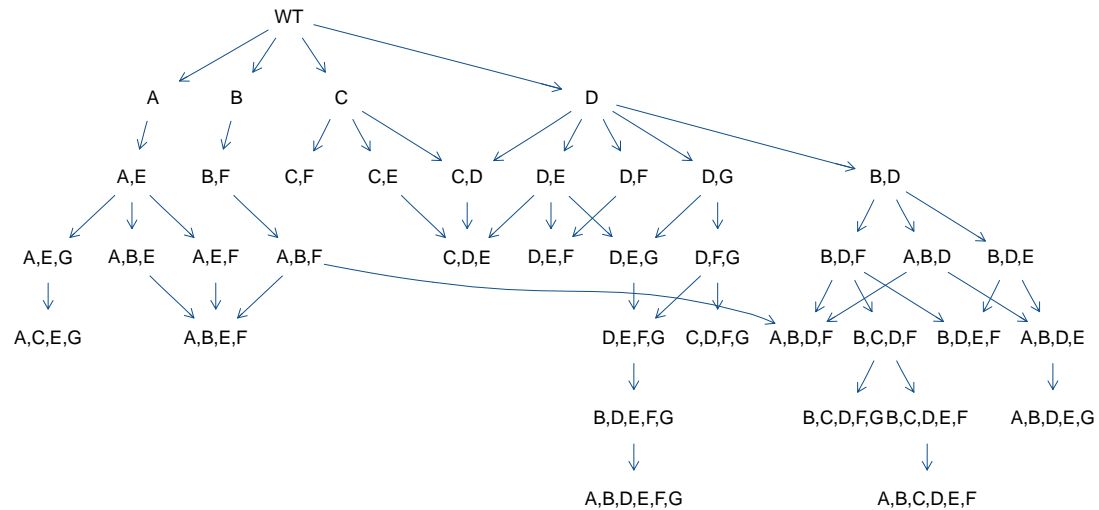

ID **PMnxoLN1P10vNrmKW**  
 acc genotypes **22**  
 peaks no back **8**  
 removed edges **NA**  
 prop rem edges **NA**

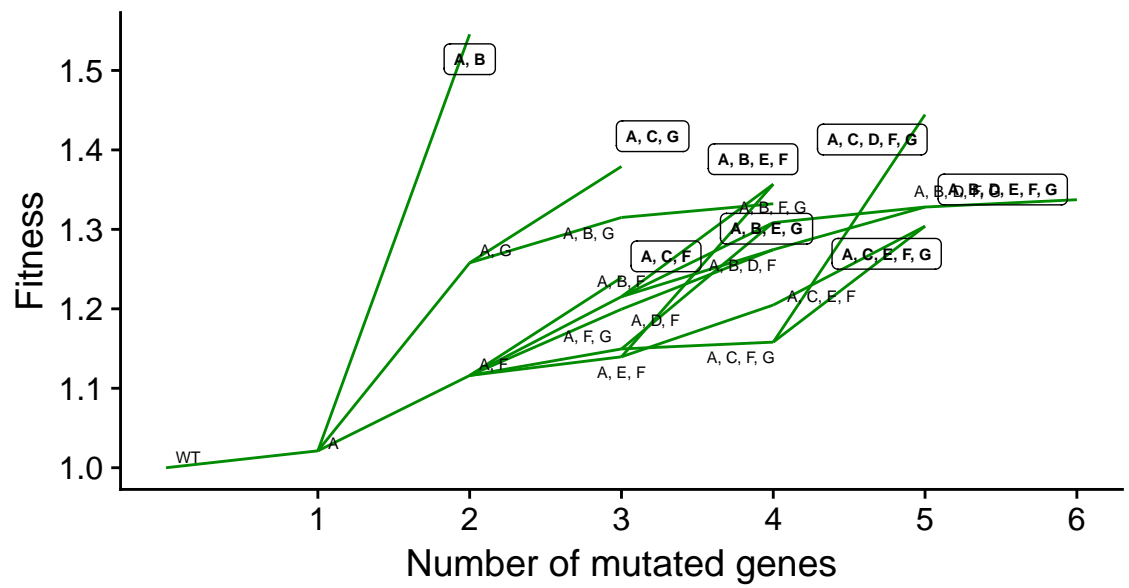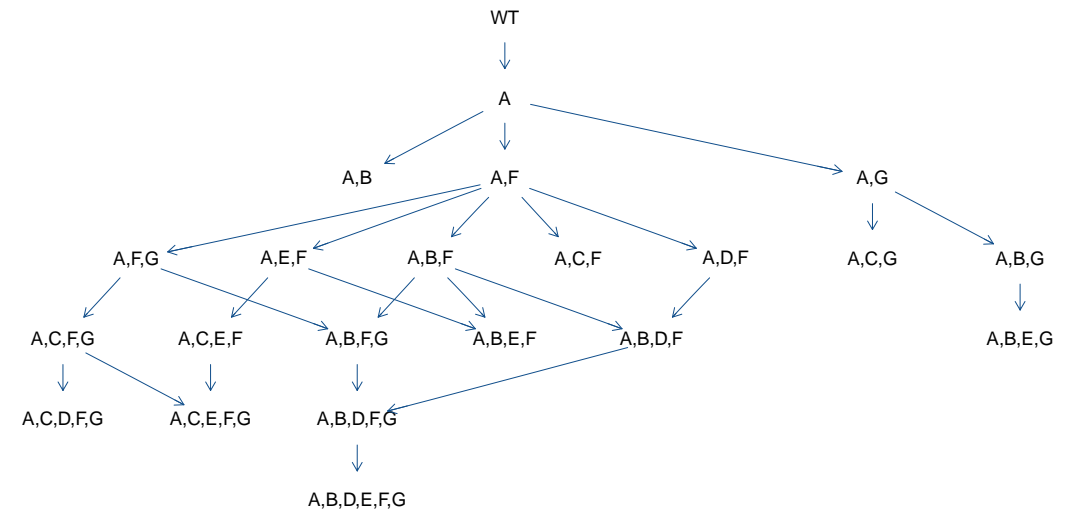

ID **poffFII3VRWbB7qo**  
 acc genotypes **49**  
 peaks no back **17**  
 removed edges **NA**  
 prop rem edges **NA**

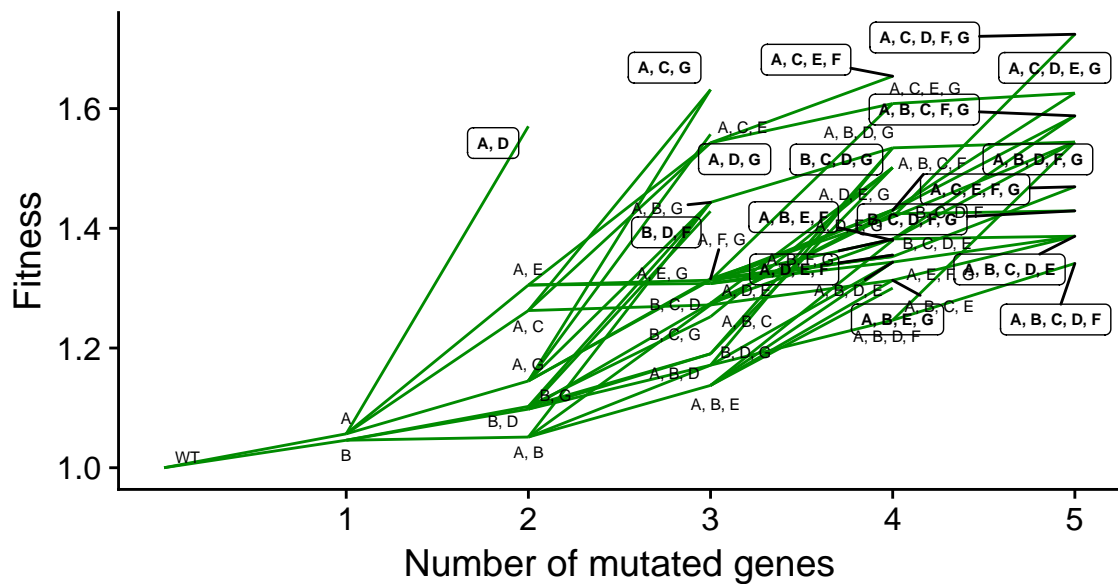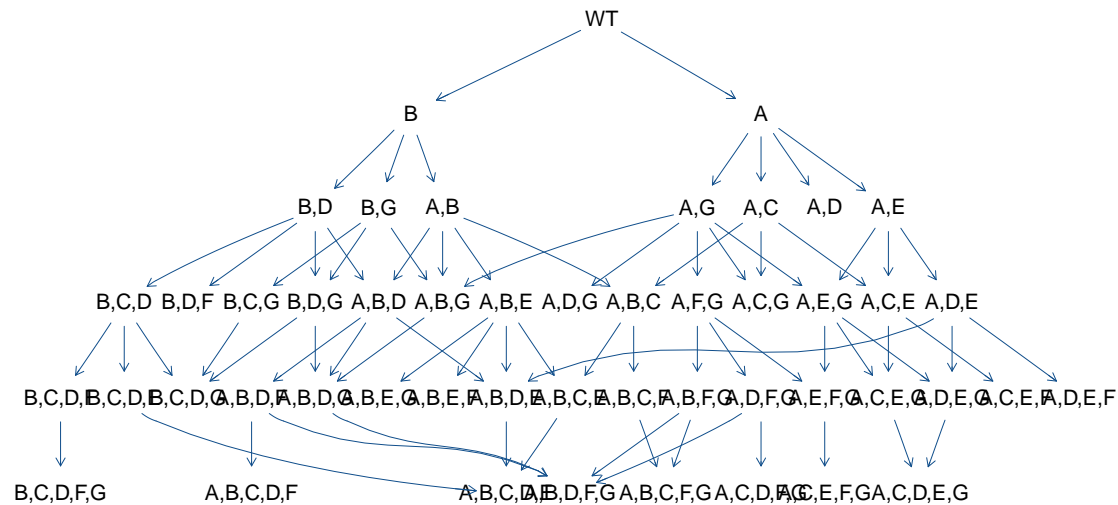



ID QdO42eriCLzJIKPT  
 acc genotypes 56  
 peaks no back 22  
 removed edges NA  
 prop rem edges NA

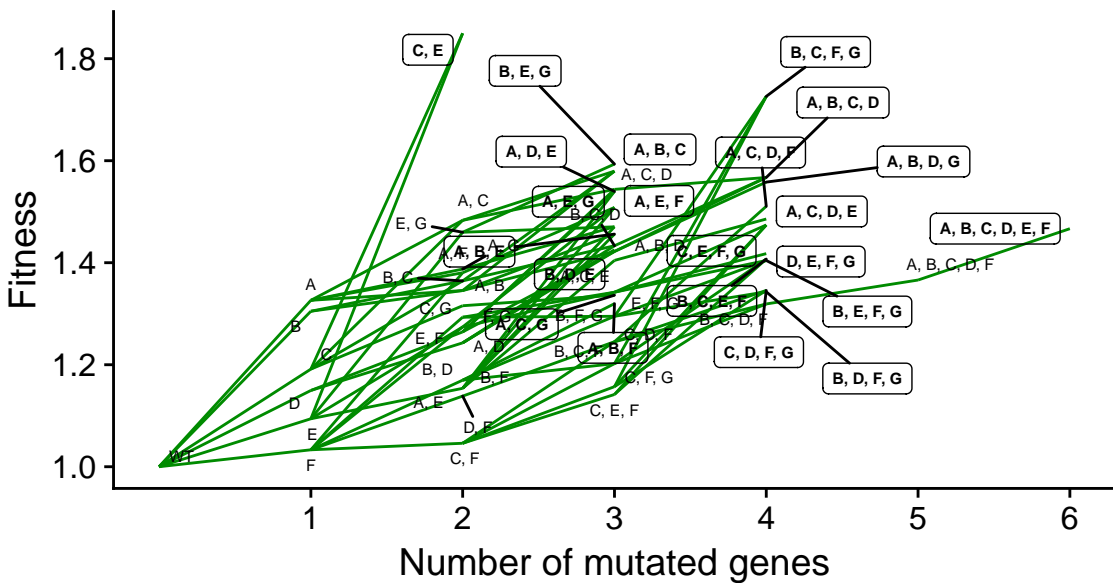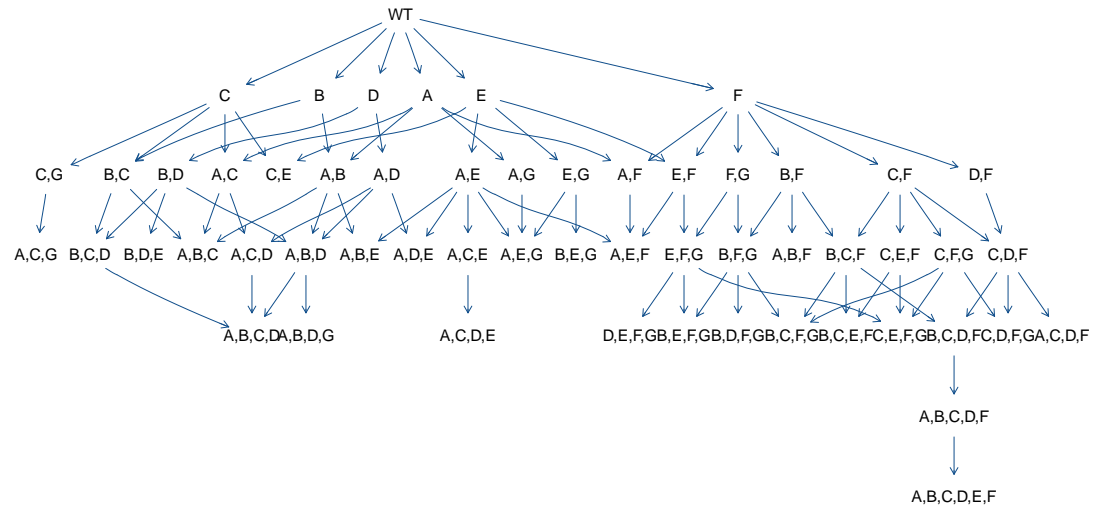

ID QDPtbXAp8i6koPnT  
 acc genotypes 18  
 peaks no back 8  
 removed edges NA  
 prop rem edges NA

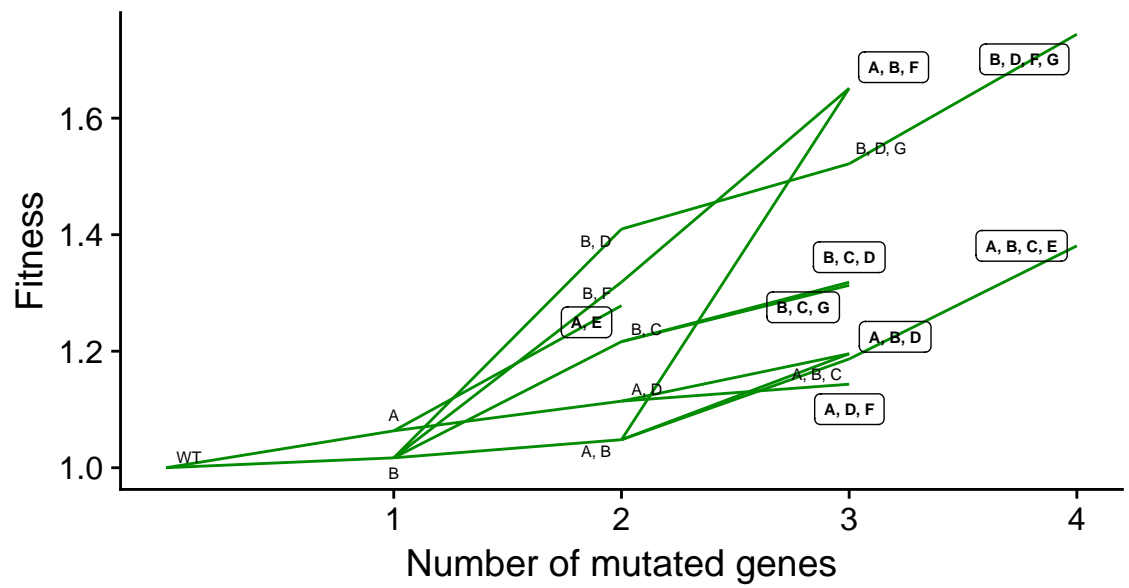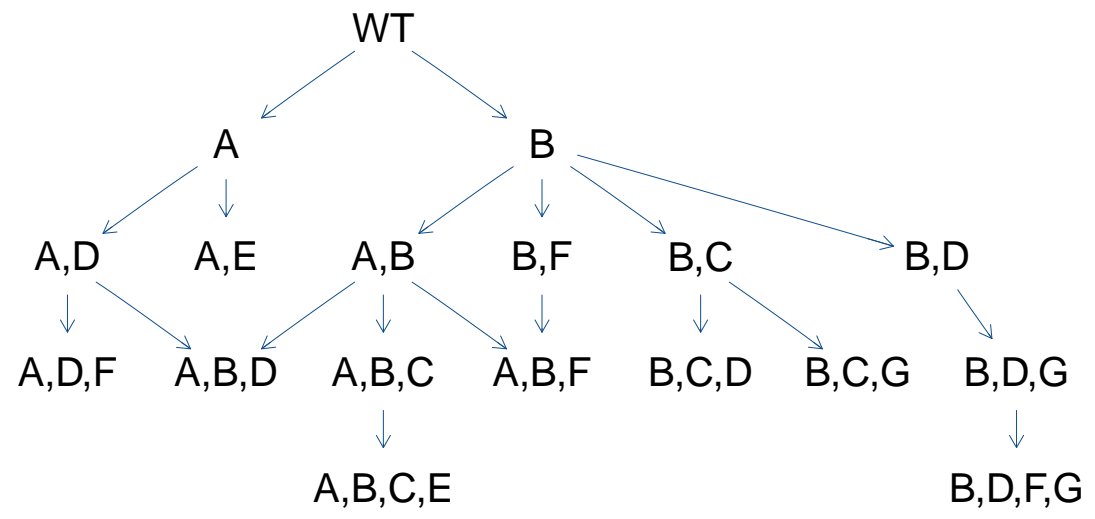

ID **QIQaxajtj6kjit1V**  
 acc genotypes **27**  
 peaks no back **10**  
 removed edges **NA**  
 prop rem edges **NA**

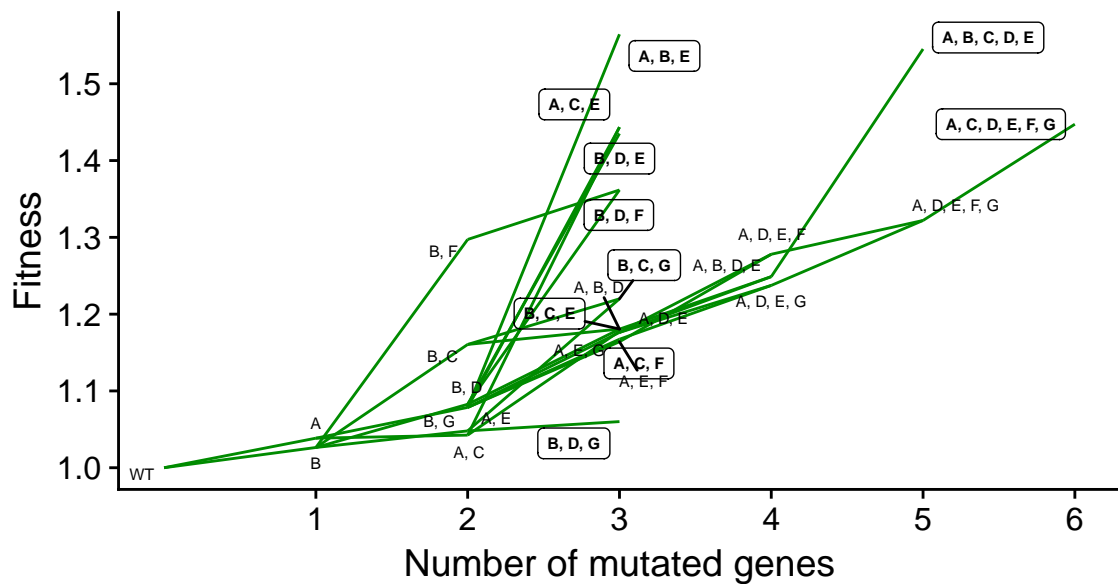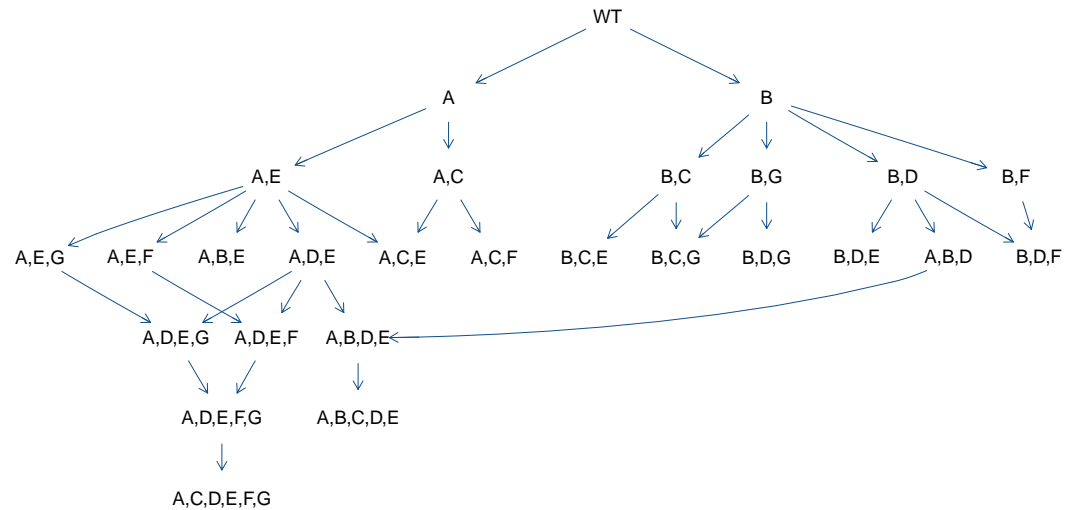

ID QTFRtRudotyAGuqB  
 acc genotypes 55  
 peaks no back 18  
 removed edges NA  
 prop rem edges NA

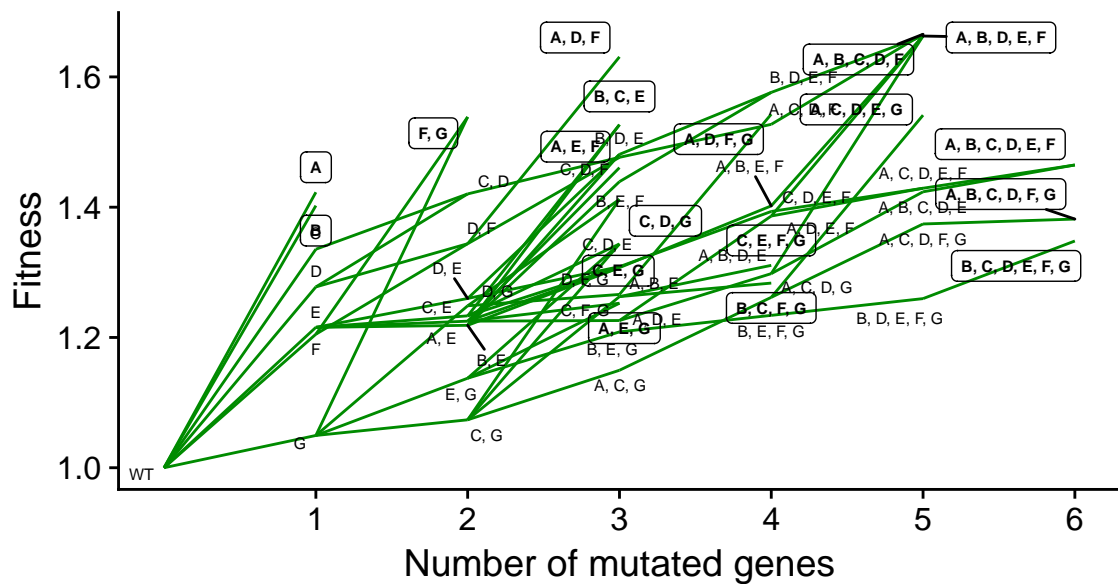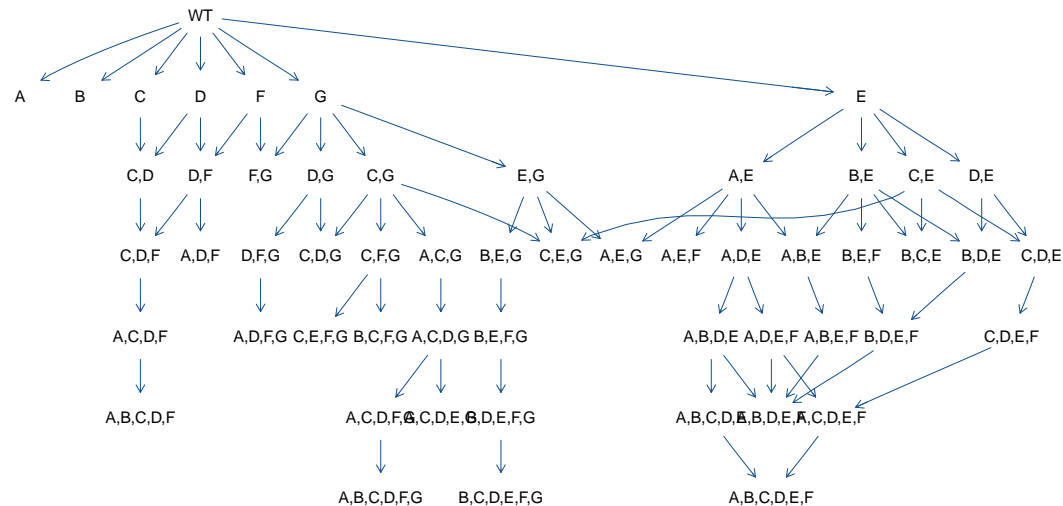





ID **r4JwqMTj8Y3k7yRZ**  
 acc genotypes **52**  
 peaks no back **15**  
 removed edges **NA**  
 prop rem edges **NA**

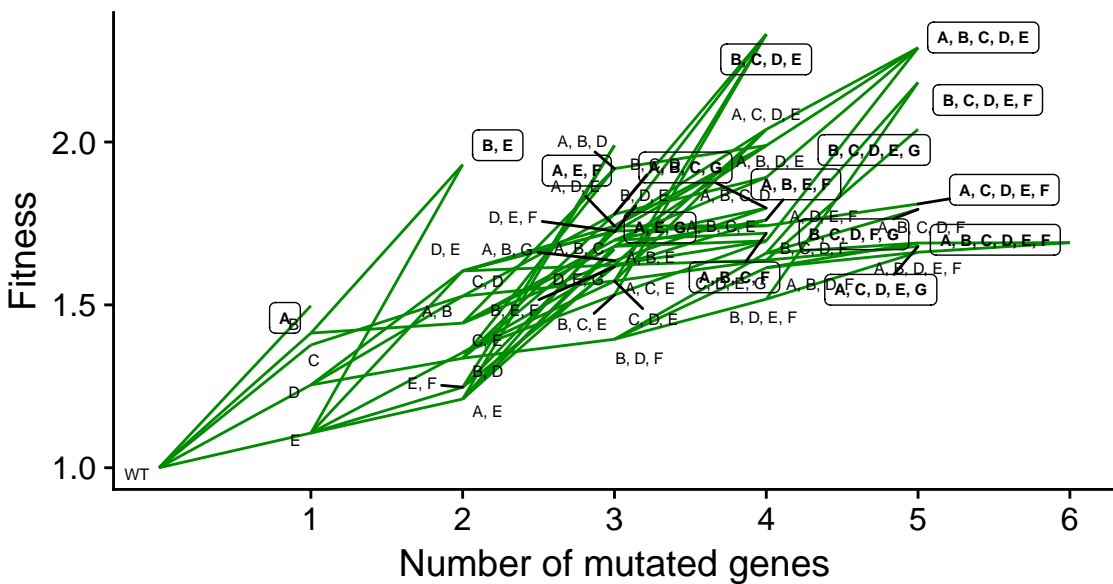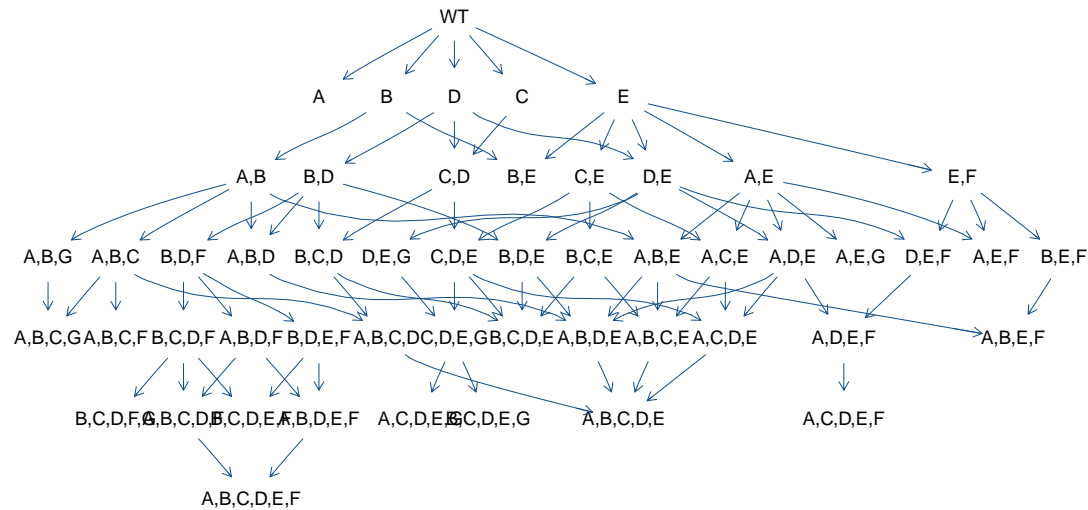

ID rB10EATzKOO2QwOlv  
 acc genotypes 23  
 peaks no back 9  
 removed edges NA  
 prop rem edges NA

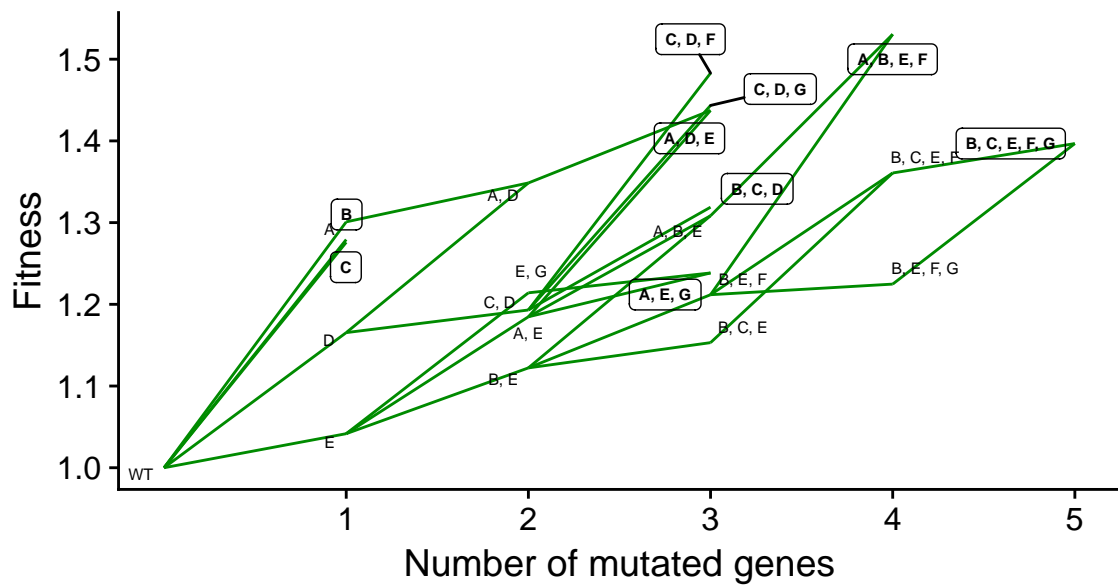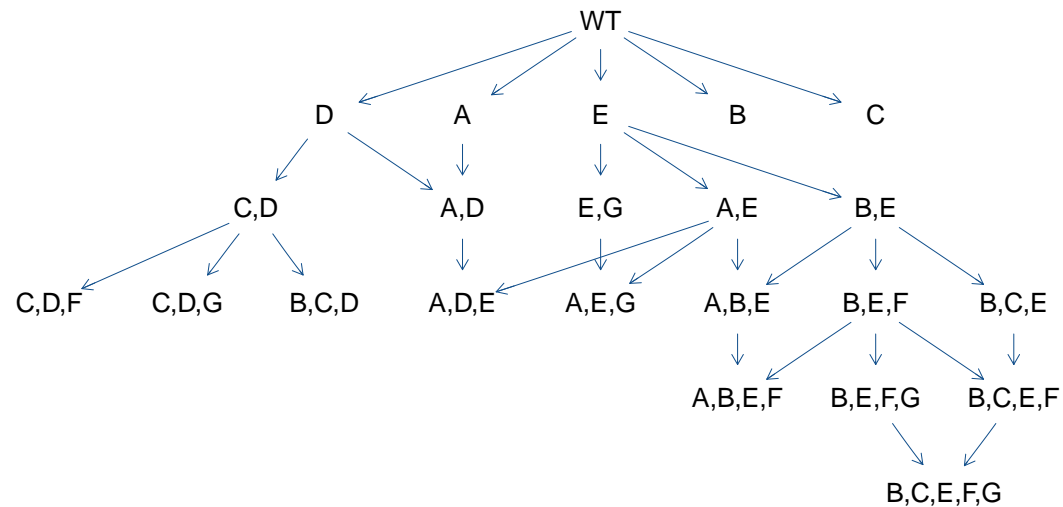

ID rCDeBXmZnImUH1  
 acc genotypes 60  
 peaks no back 24  
 removed edges NA  
 prop rem edges NA

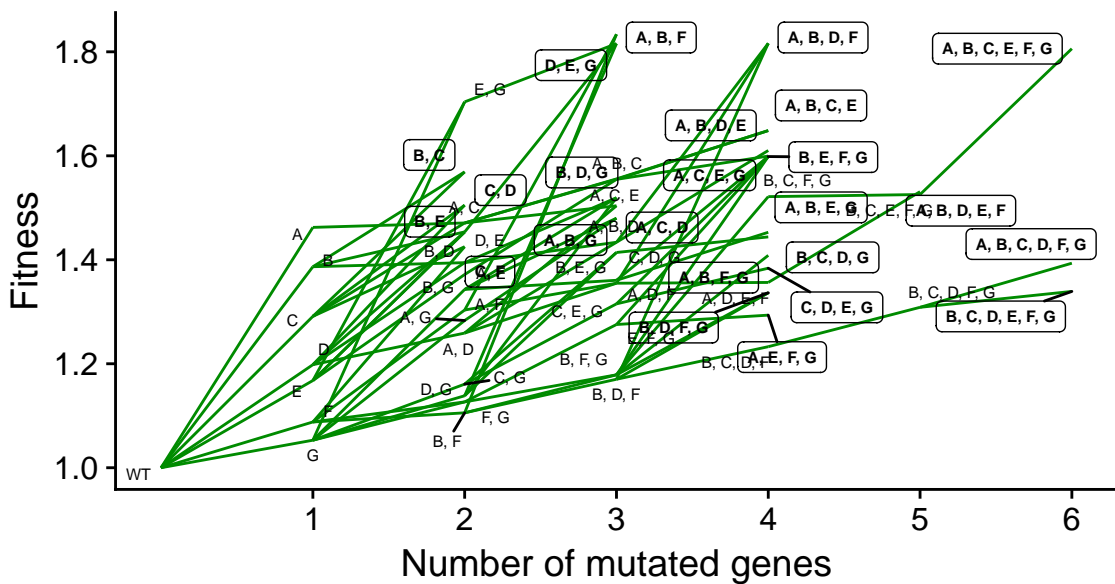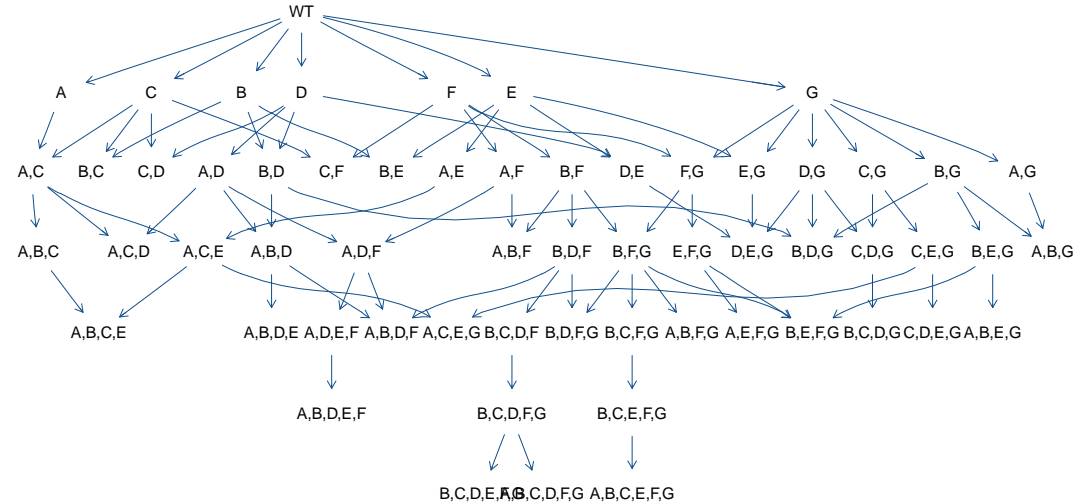



*ID* rhc6UcRhym147xh4  
*acc genotypes* 12  
*peaks no back* 6  
*removed edges* NA  
*prop rem edges* NA

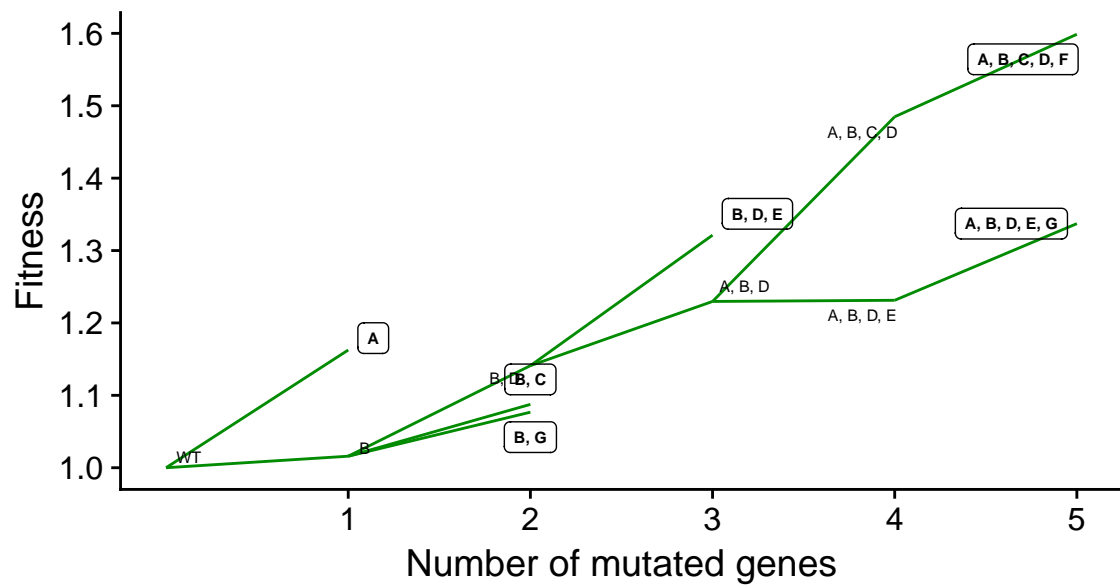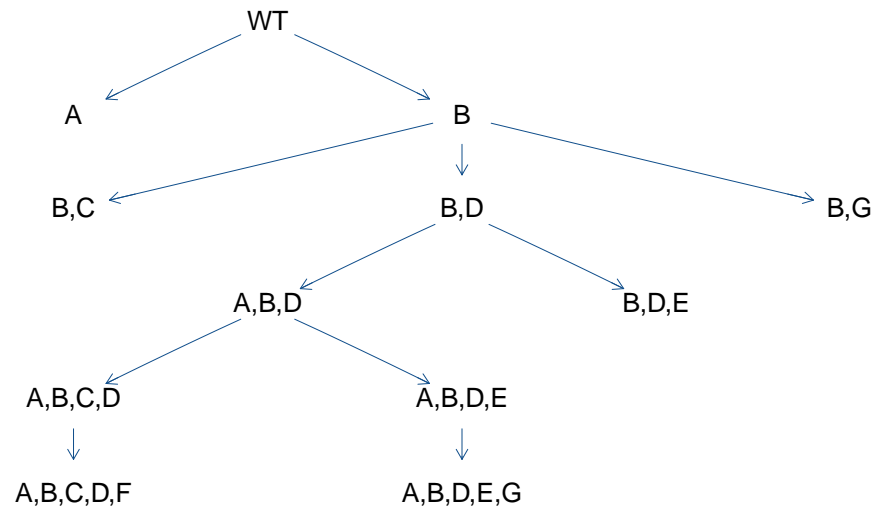

ID RmugDTsuCjx1A19r  
 acc genotypes 14  
 peaks no back 6  
 removed edges NA  
 prop rem edges NA

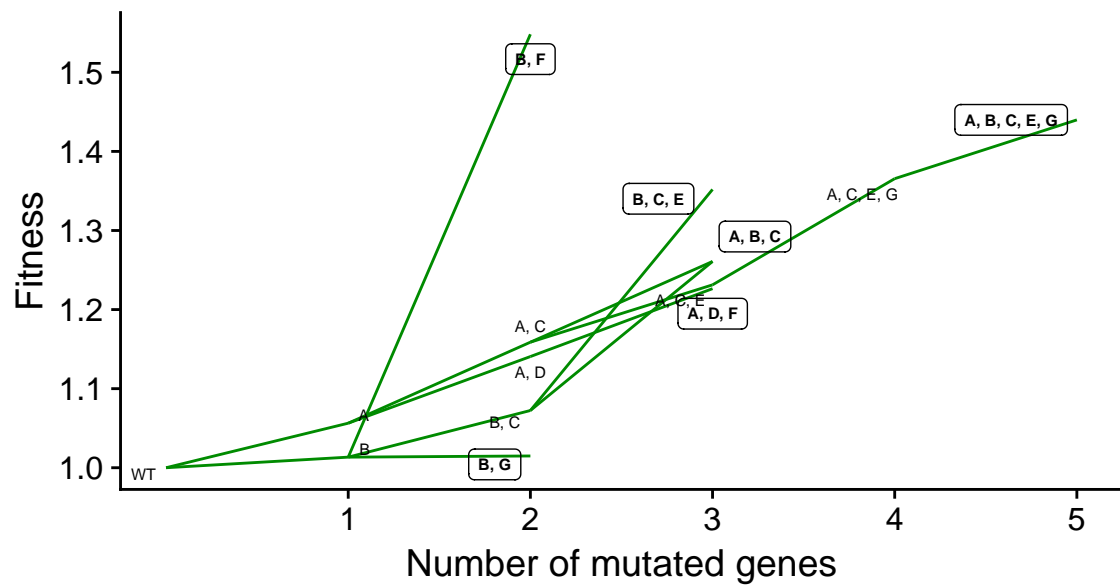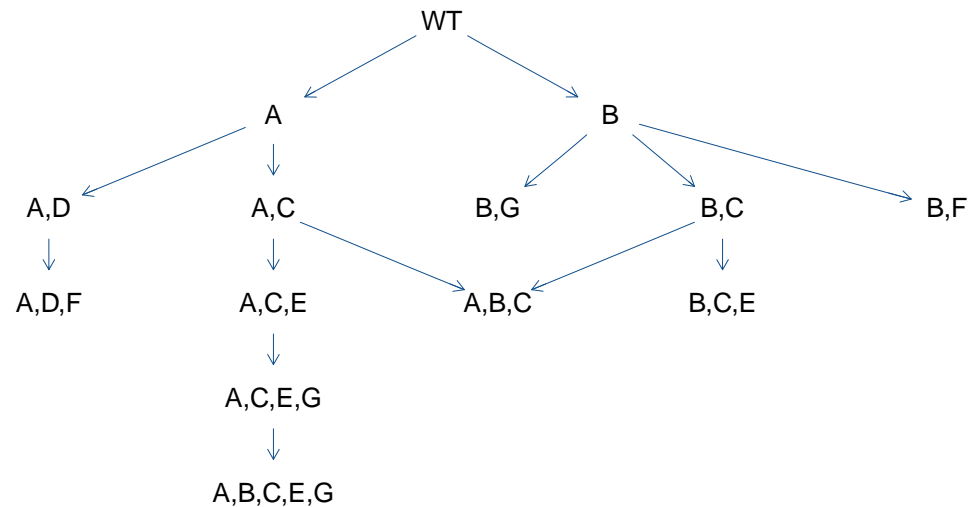





ID **rWqwwMtuP4hFOLRB**  
 acc genotypes **66**  
 peaks no back **15**  
 removed edges **NA**  
 prop rem edges **NA**

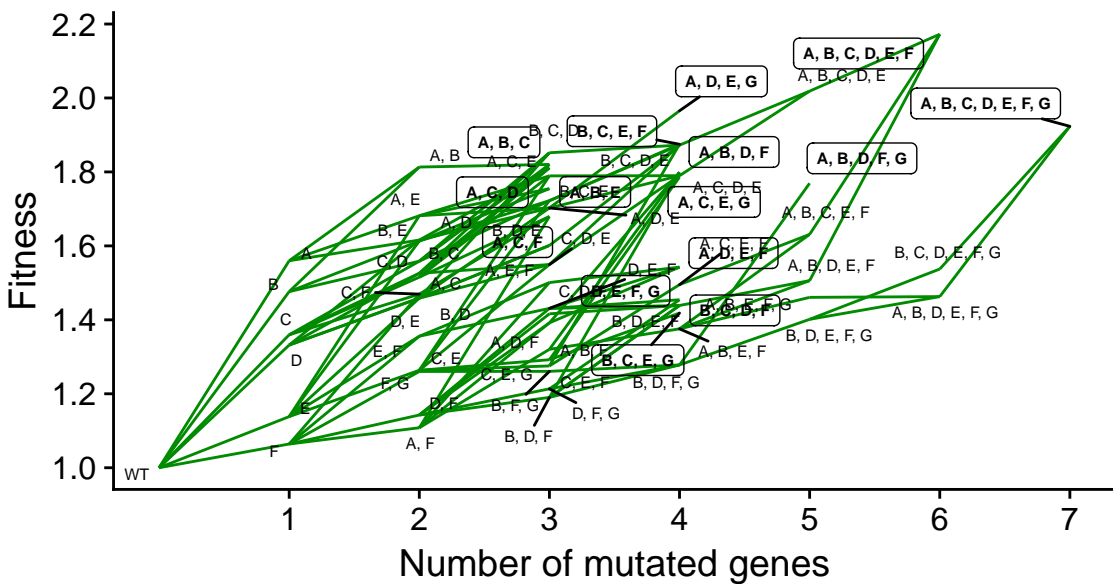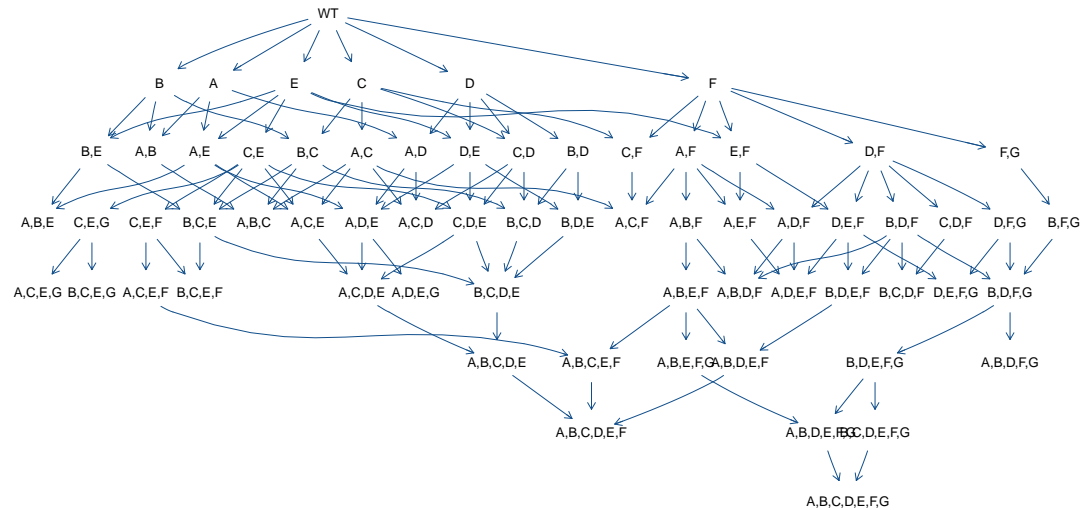

ID rX57ibCOZcMSMm4z  
 acc genotypes 30  
 peaks no back 12  
 removed edges NA  
 prop rem edges NA

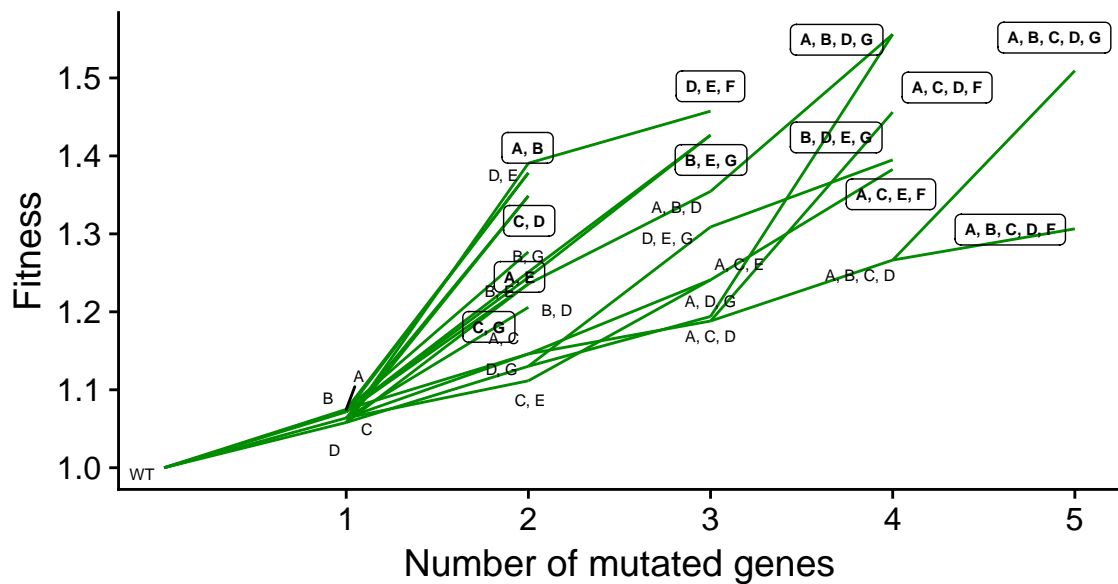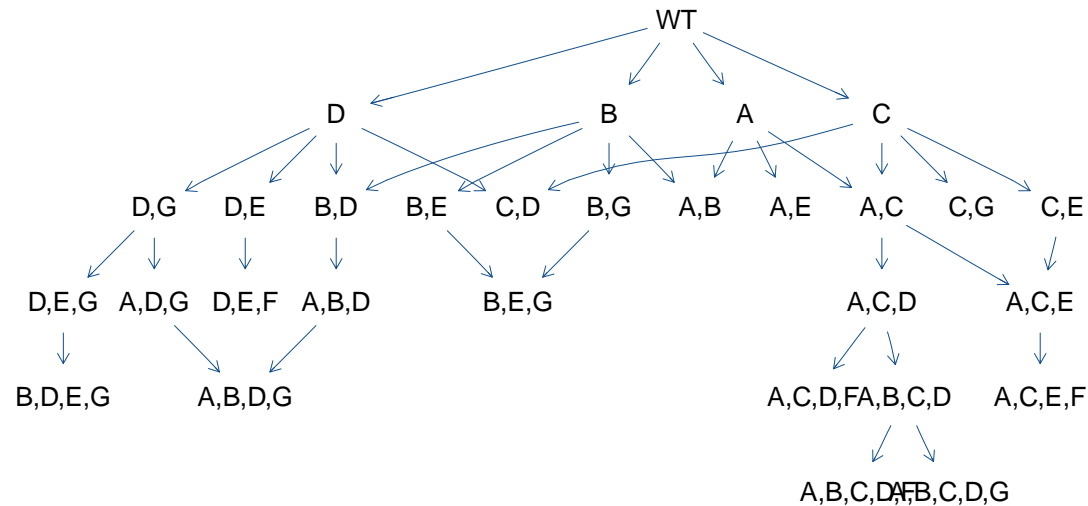

ID s10ieWttHAueSTqaL  
 acc genotypes 74  
 peaks no back 25  
 removed edges NA  
 prop rem edges NA

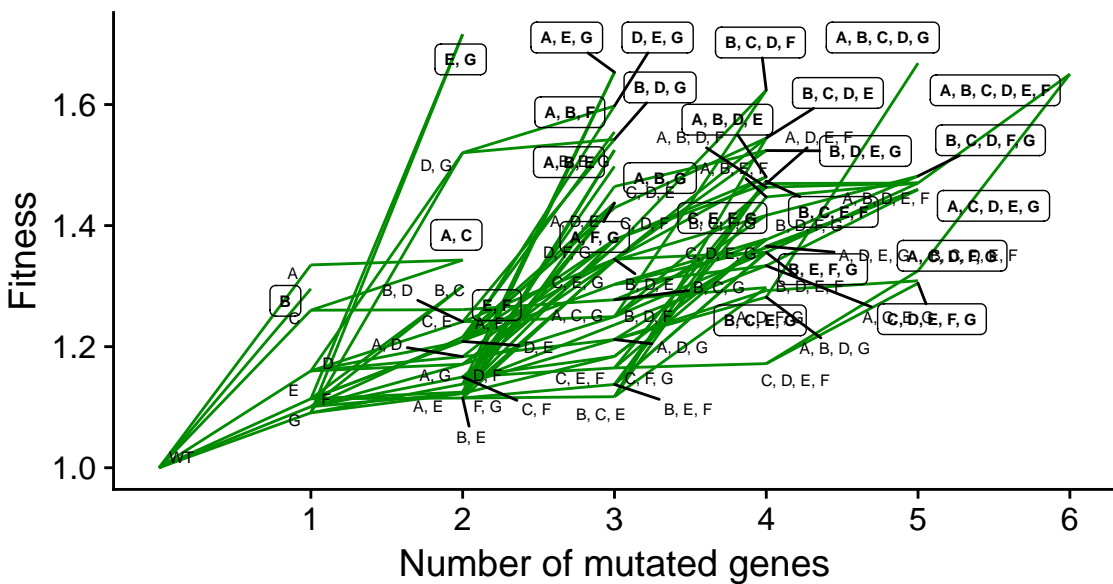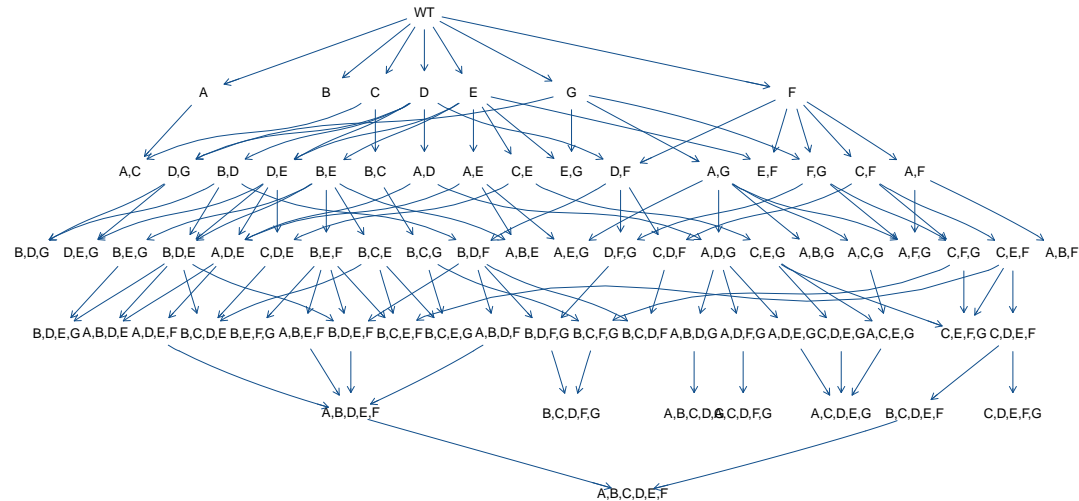

ID s5lzMrcmZRB5b6Mo  
 acc genotypes 28  
 peaks no back 10  
 removed edges NA  
 prop rem edges NA

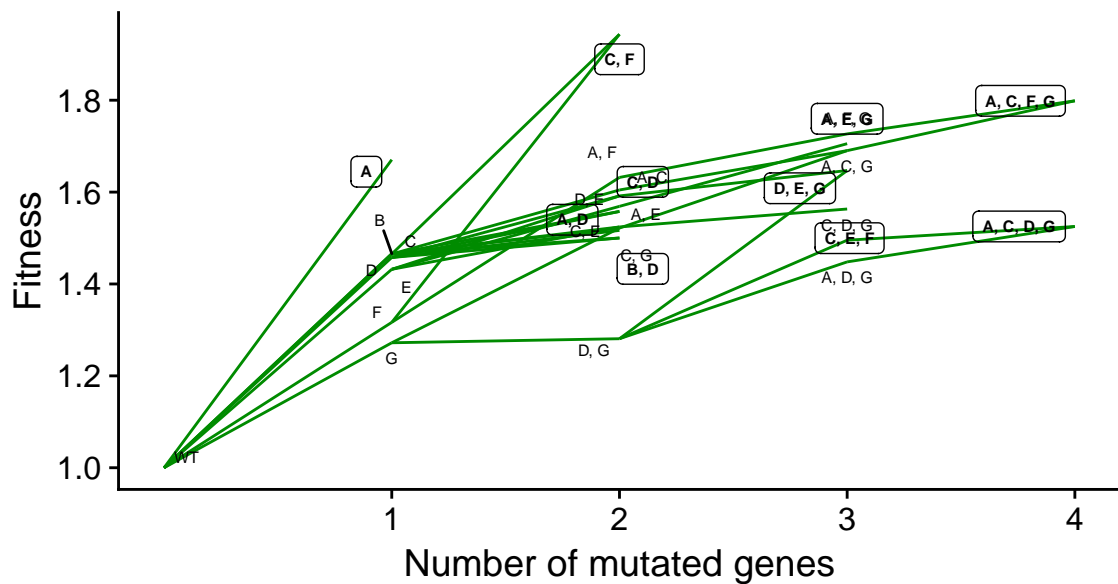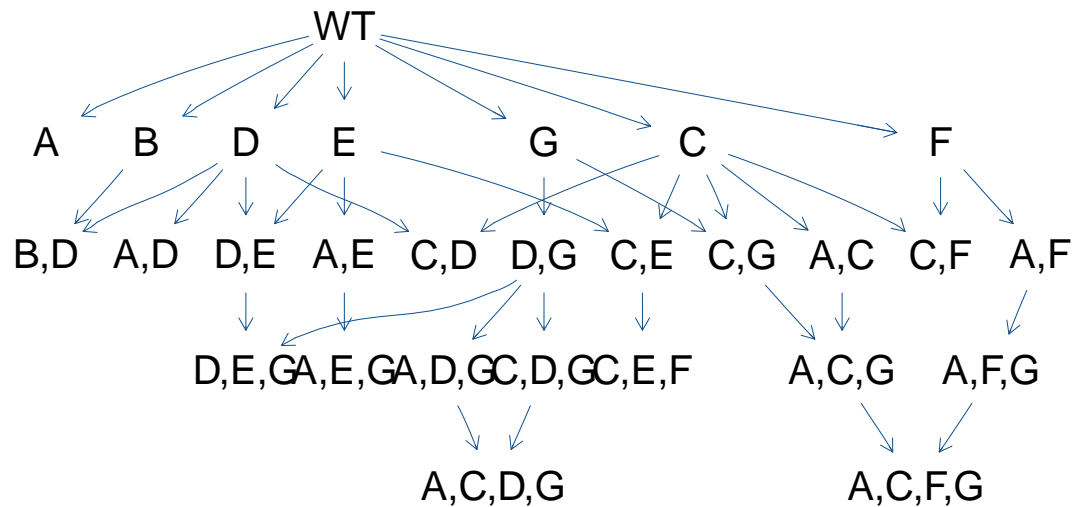

ID sgP24AiGrN2flVGV  
 acc genotypes 43  
 peaks no back 10  
 removed edges NA  
 prop rem edges NA

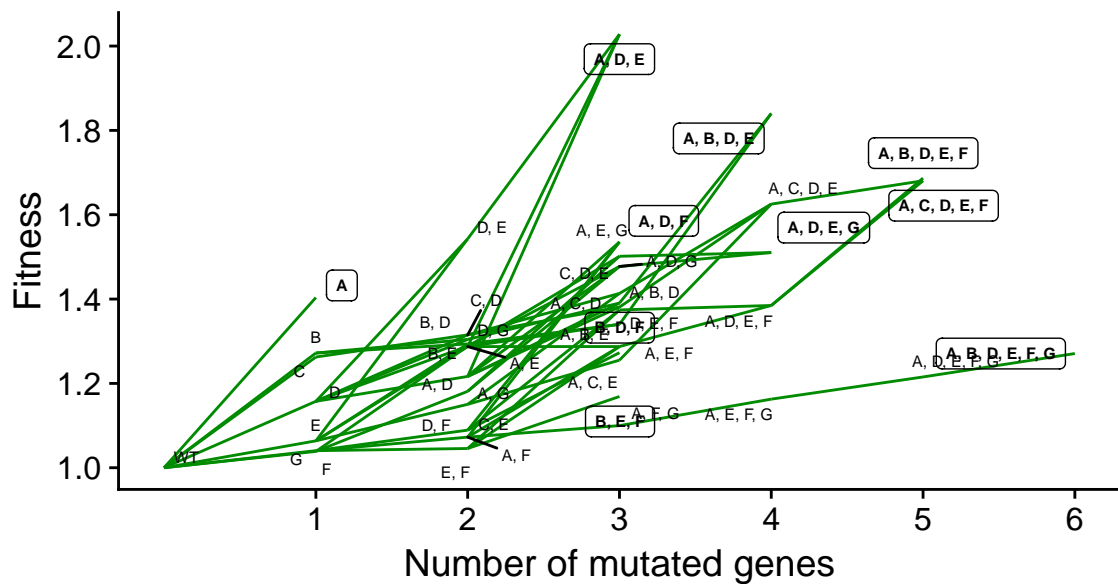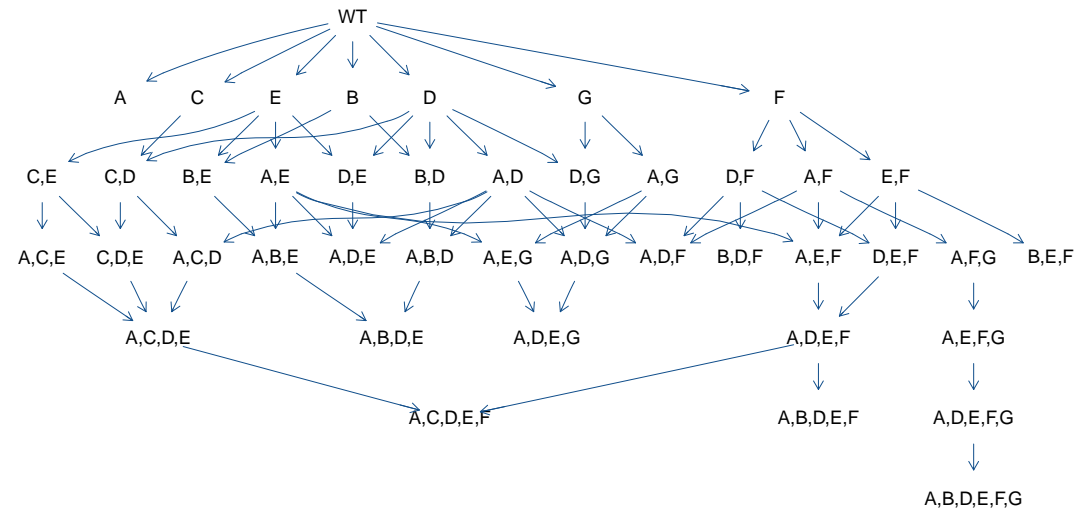

*ID* sJhH8DjY2yo2ZQjo  
*acc genotypes* 19  
*peaks no back* 8  
*removed edges* NA  
*prop rem edges* NA

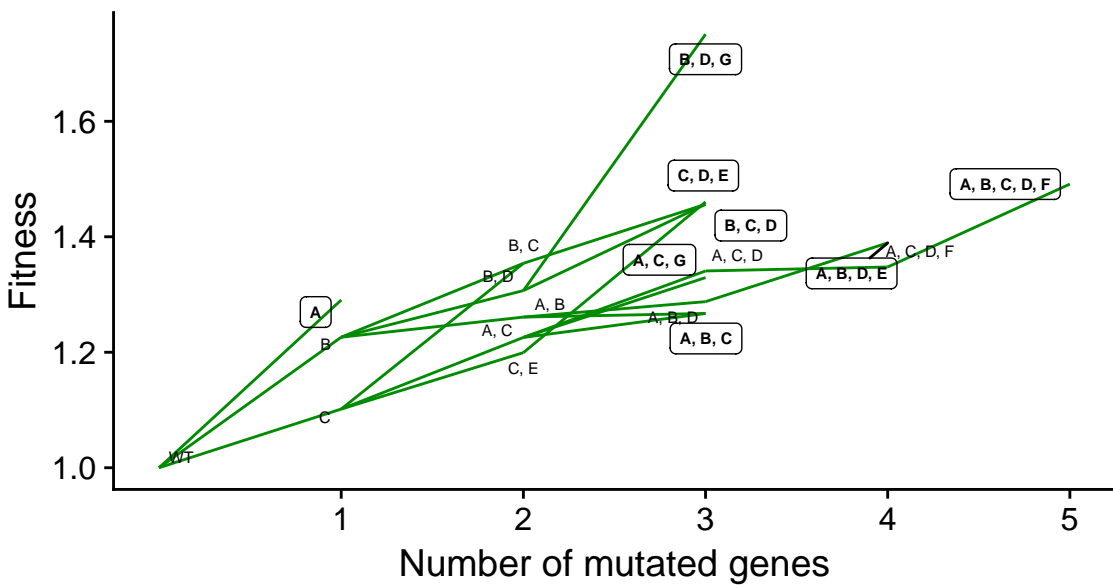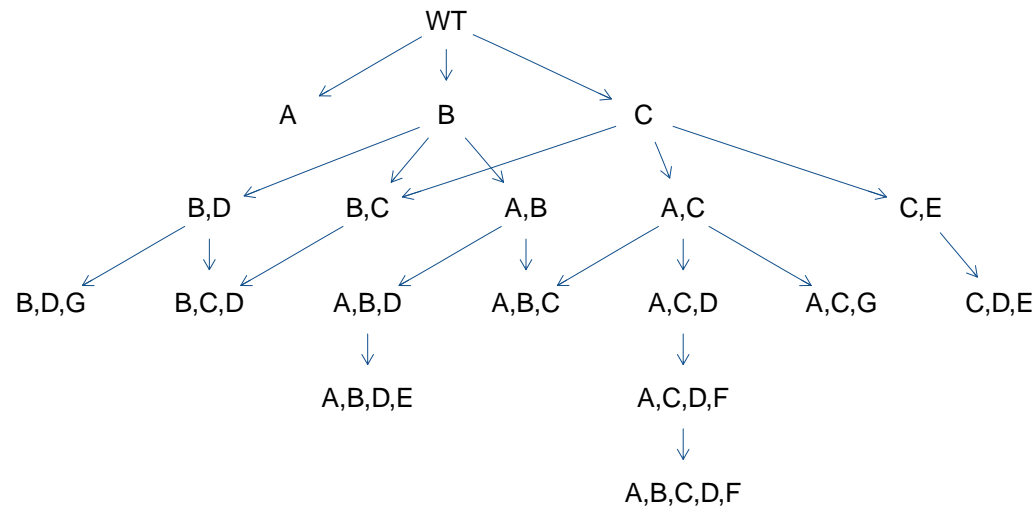

ID SpvxDYG1010zub43g5  
 acc genotypes 25  
 peaks no back 12  
 removed edges NA  
 prop rem edges NA

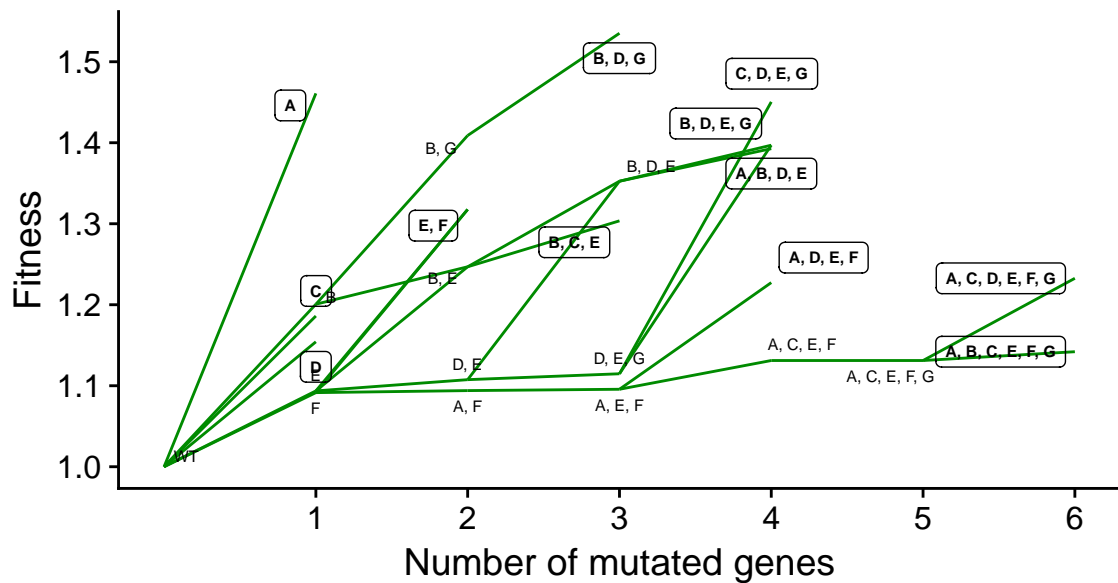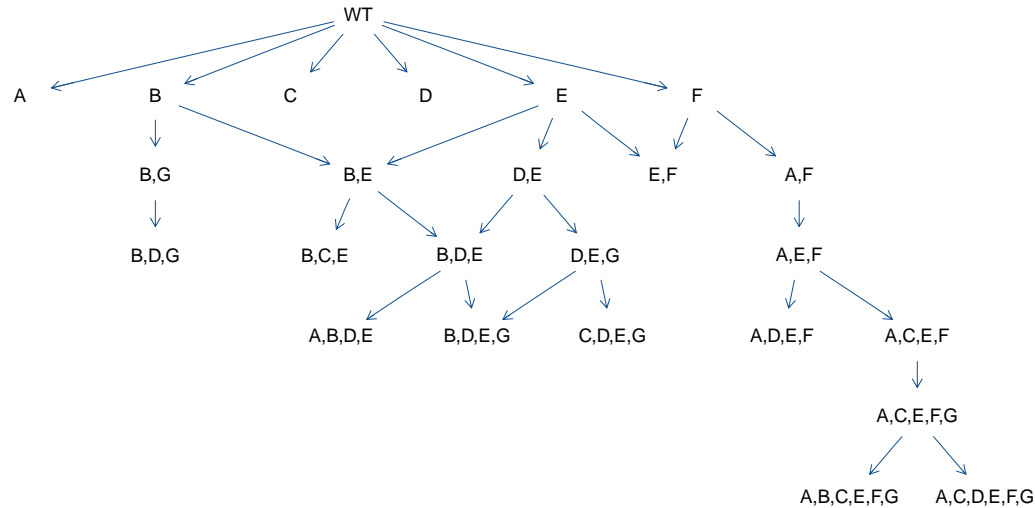

ID SRBzzEiA3CEspfsm  
 acc genotypes 51  
 peaks no back 12  
 removed edges NA  
 prop rem edges NA

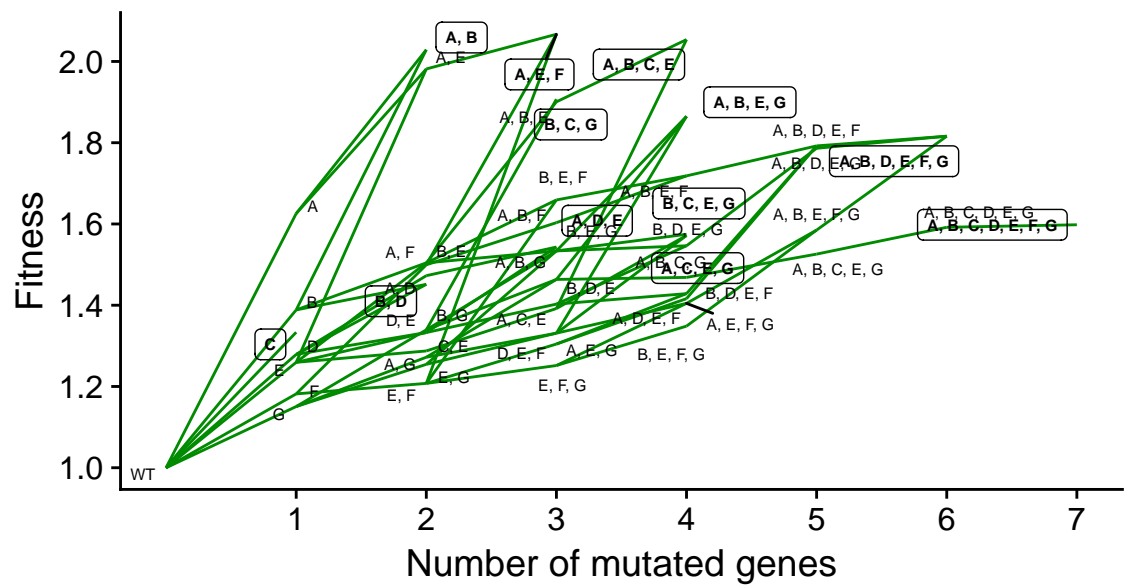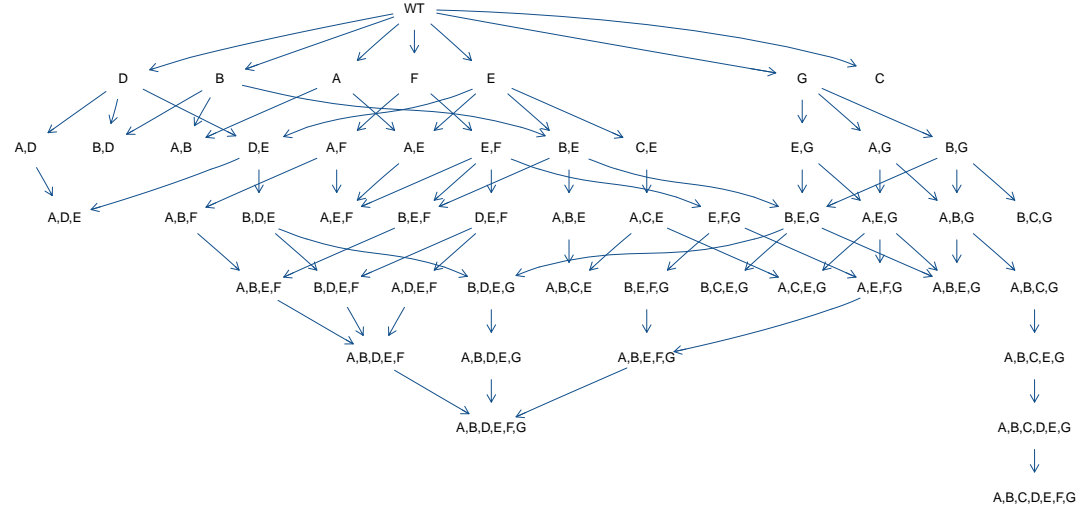



ID SWE6nweARORL1yFW  
 acc genotypes 19  
 peaks no back 6  
 removed edges NA  
 prop rem edges NA

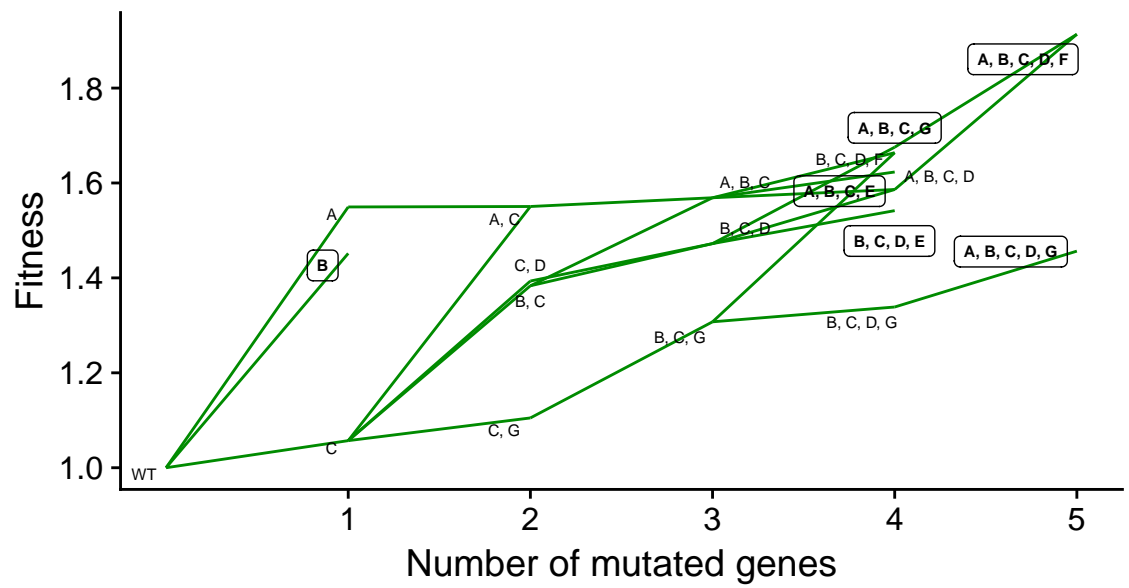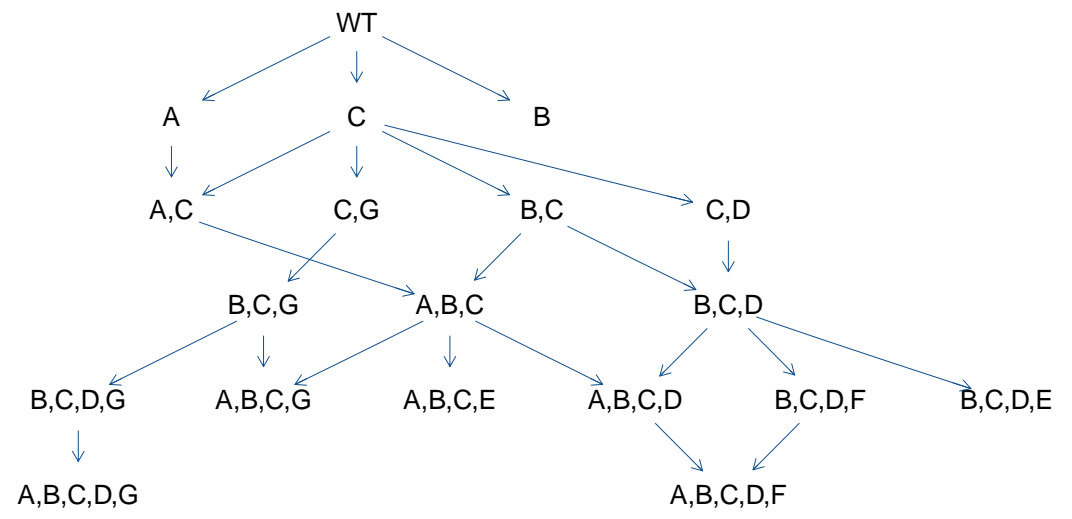

ID t10CCmCuCK9esa9Rx  
 acc genotypes 55  
 peaks no back 20  
 removed edges NA  
 prop rem edges NA

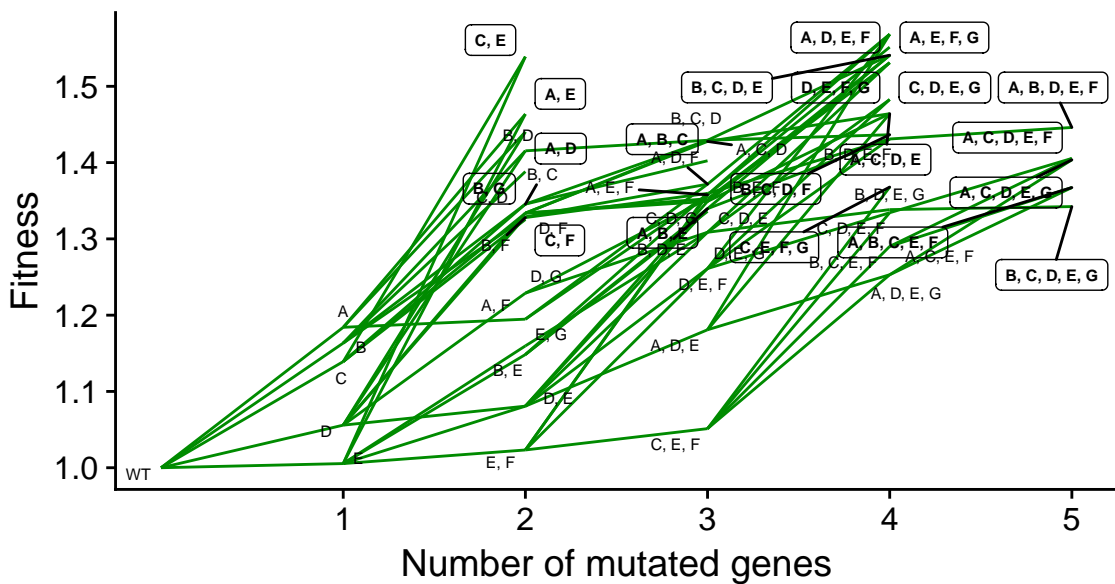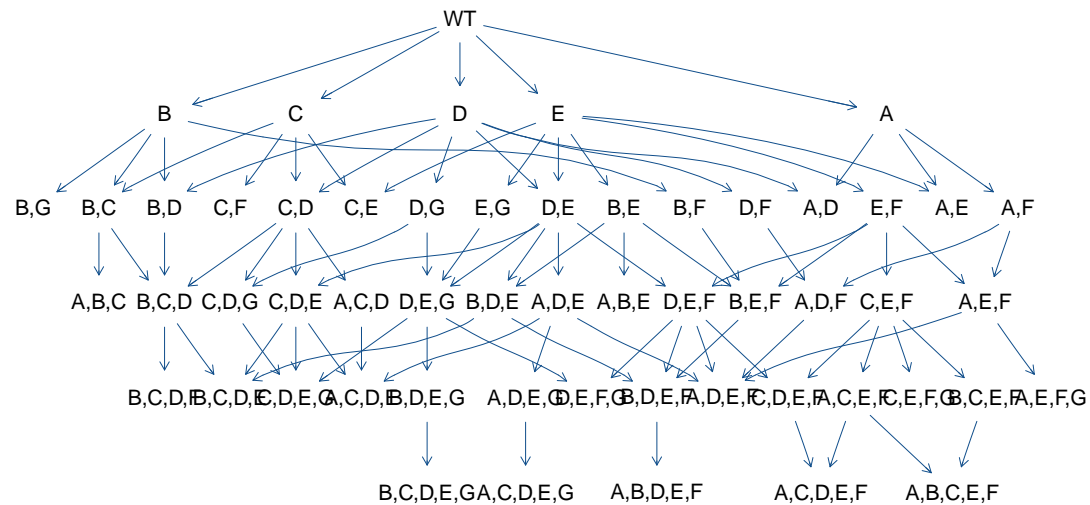

ID **tgqvbY64a2p366jT**  
 acc genotypes **46**  
 peaks no back **14**  
 removed edges **NA**  
 prop rem edges **NA**

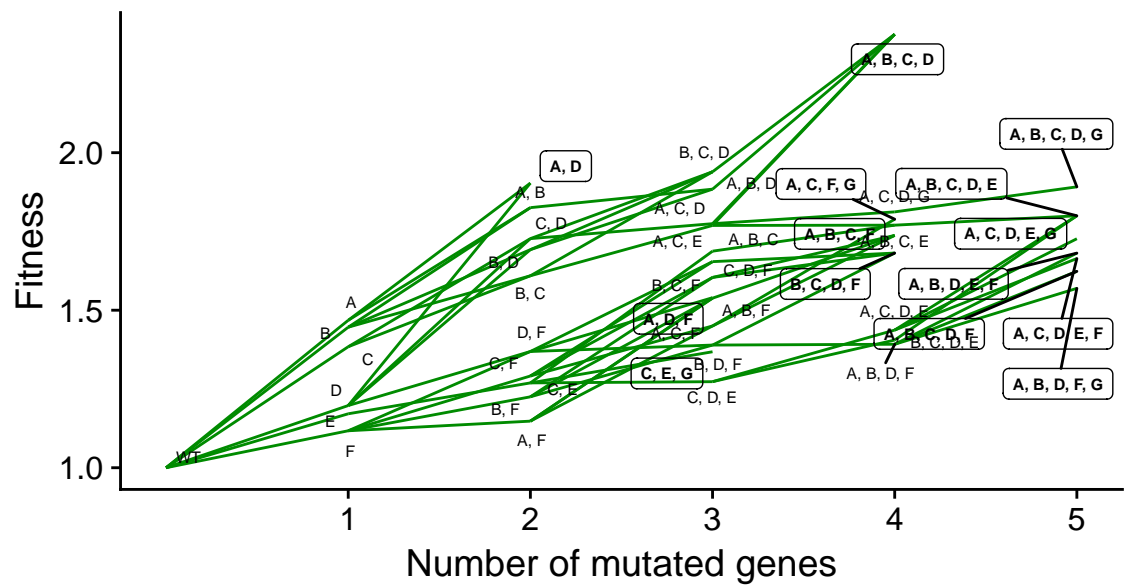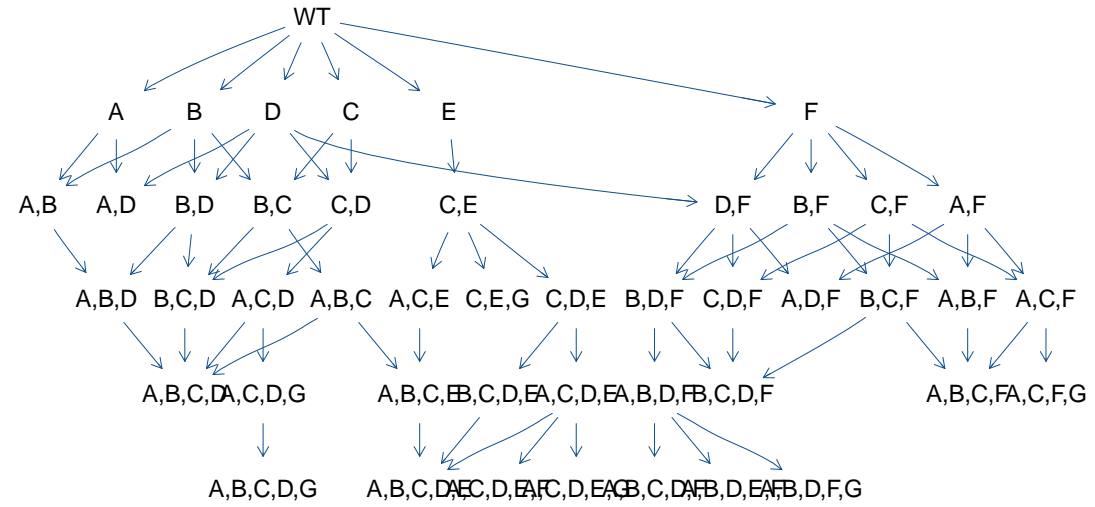

ID TgUTHKueceu4QsBH  
 acc genotypes 18  
 peaks no back 9  
 removed edges NA  
 prop rem edges NA

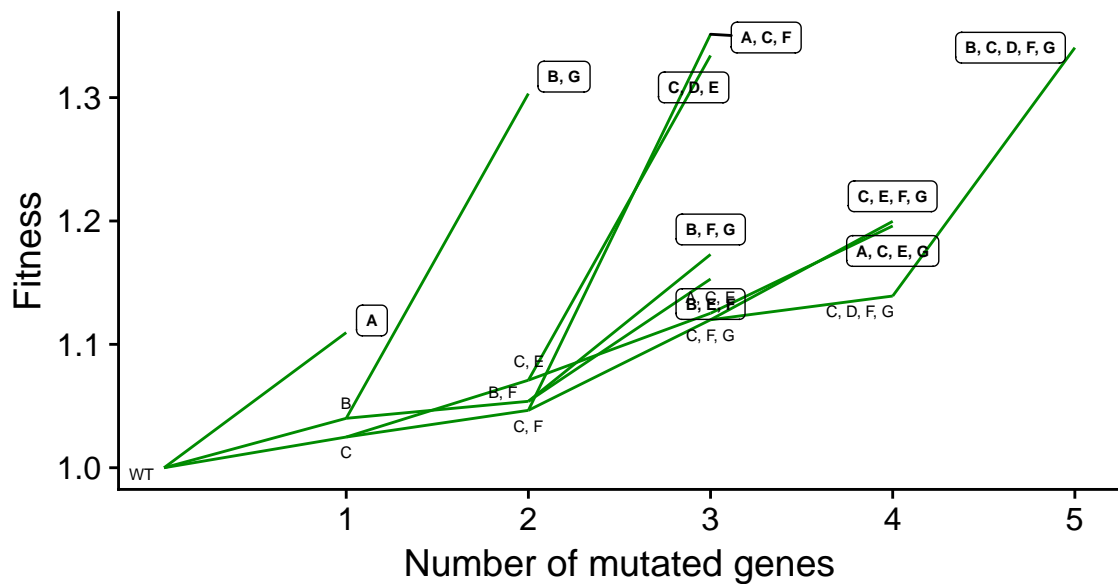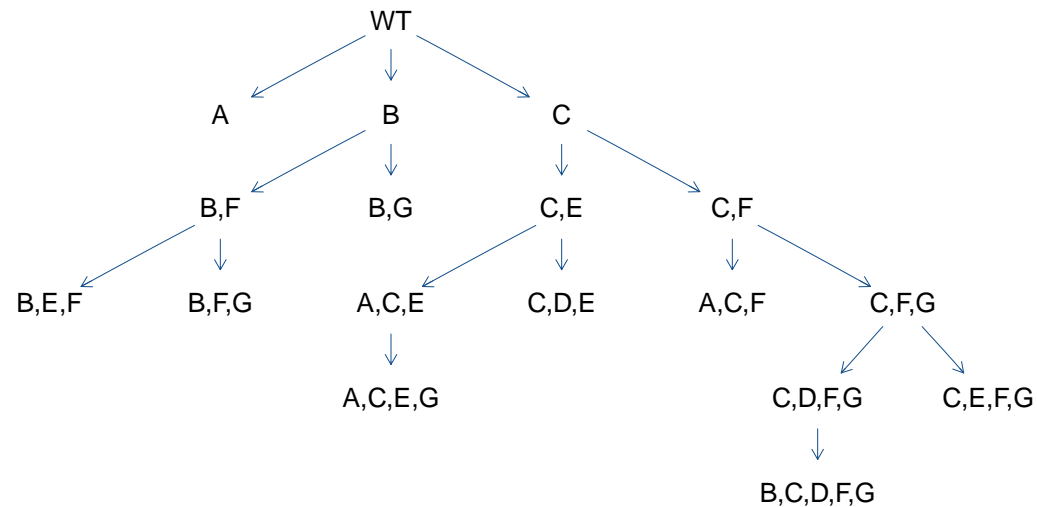

ID TgwvxlVA3IzbdSYC  
 acc genotypes 38  
 peaks no back 14  
 removed edges NA  
 prop rem edges NA

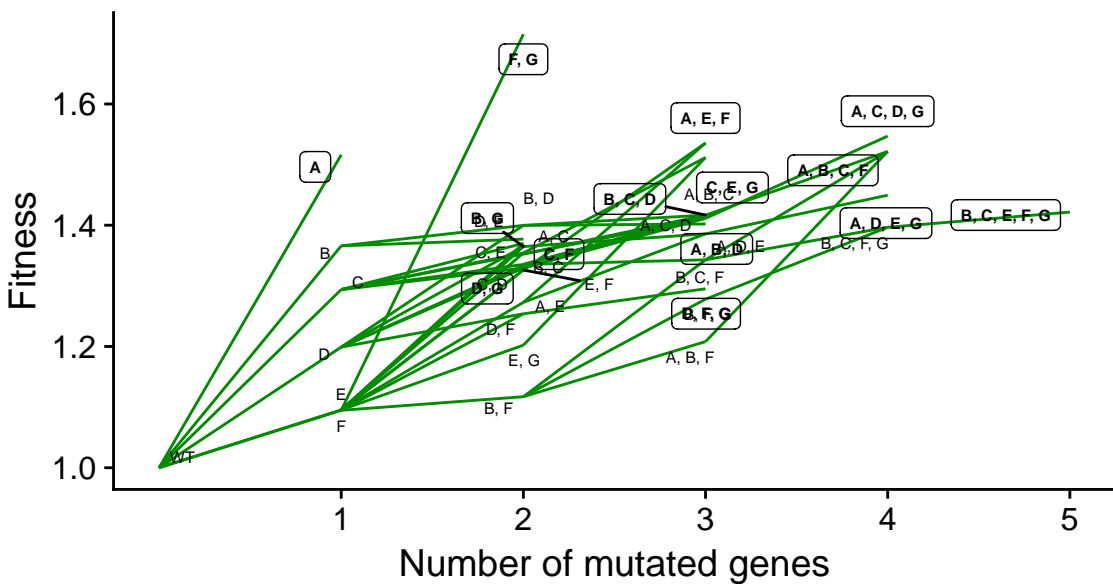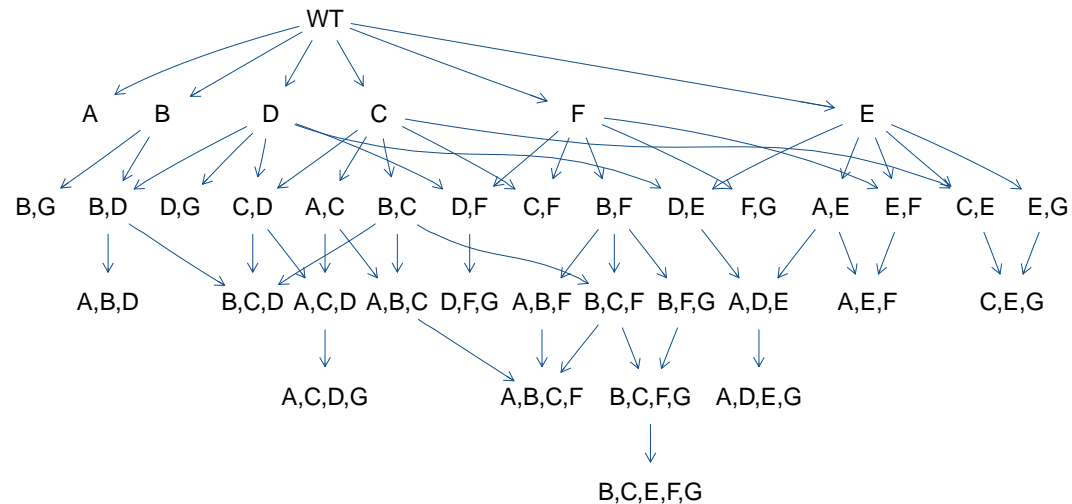

ID tHfMAysqIiLPDZQ5  
 acc genotypes 23  
 peaks no back 7  
 removed edges NA  
 prop rem edges NA

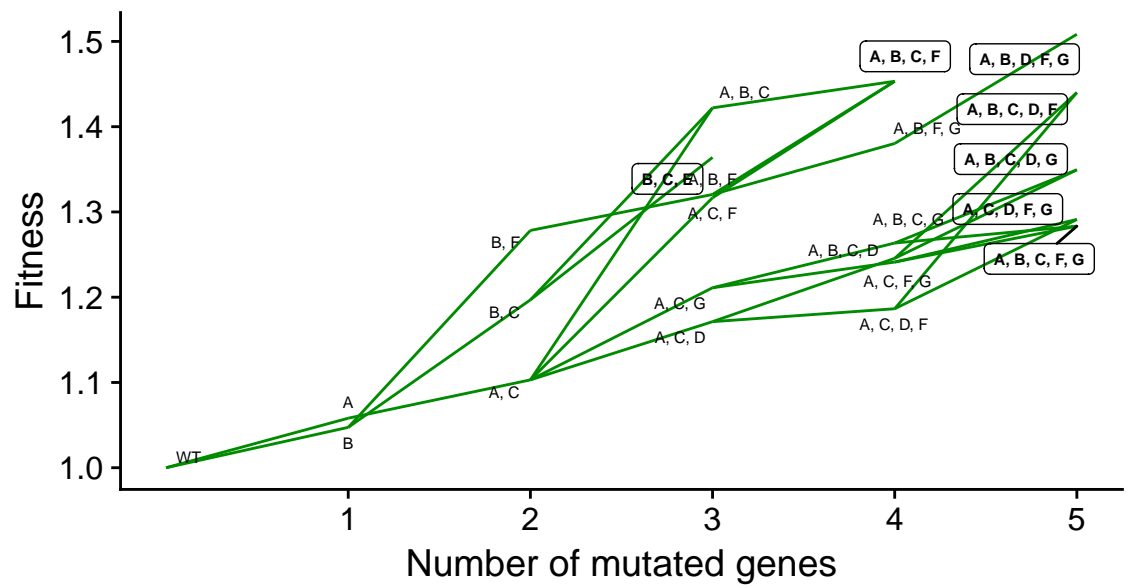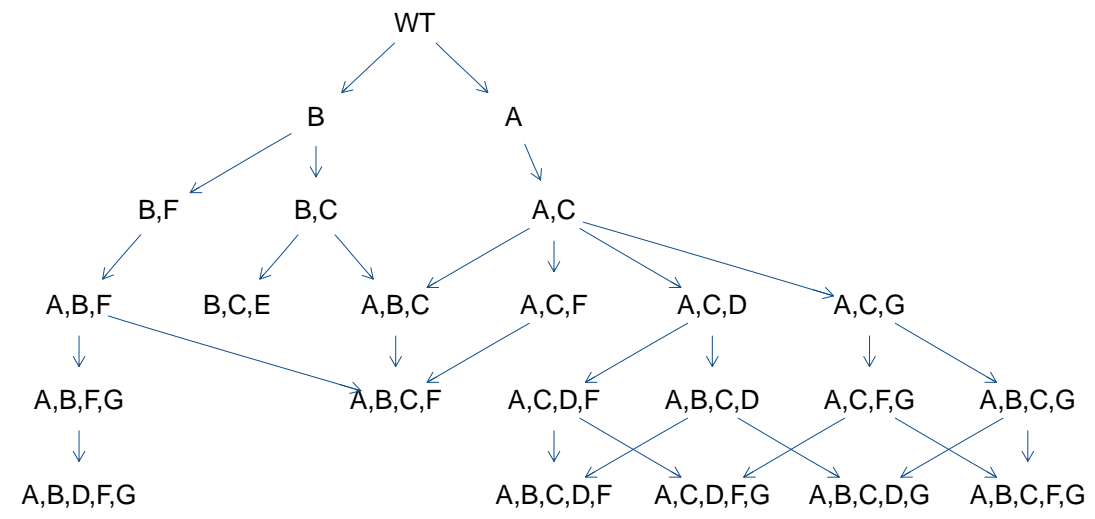

ID TJaoNibPIMSgt11f  
 acc genotypes 24  
 peaks no back 12  
 removed edges NA  
 prop rem edges NA

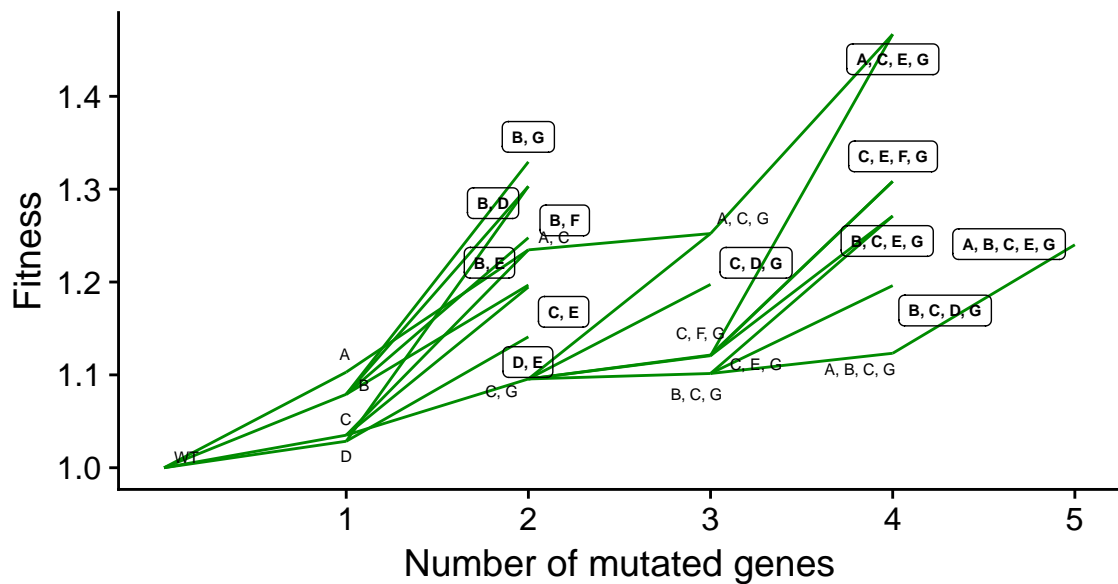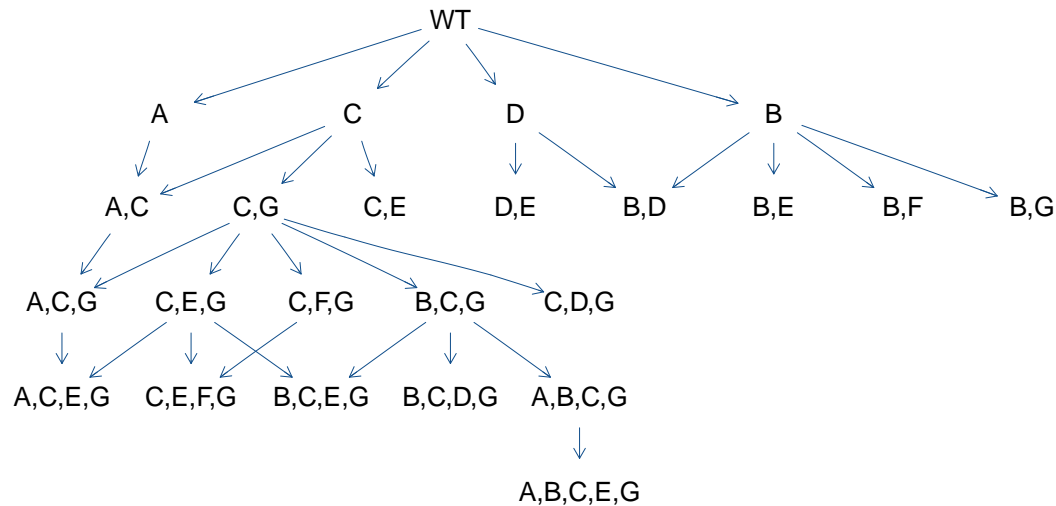

ID T110ATX82Nhqew8T7  
 acc genotypes 80  
 peaks no back 15  
 removed edges NA  
 prop rem edges NA

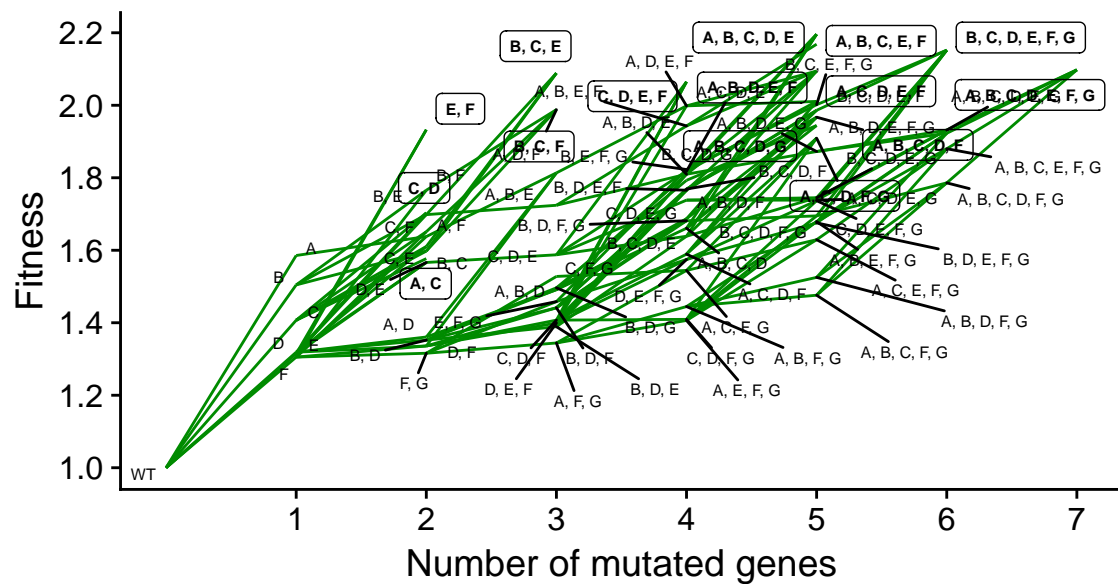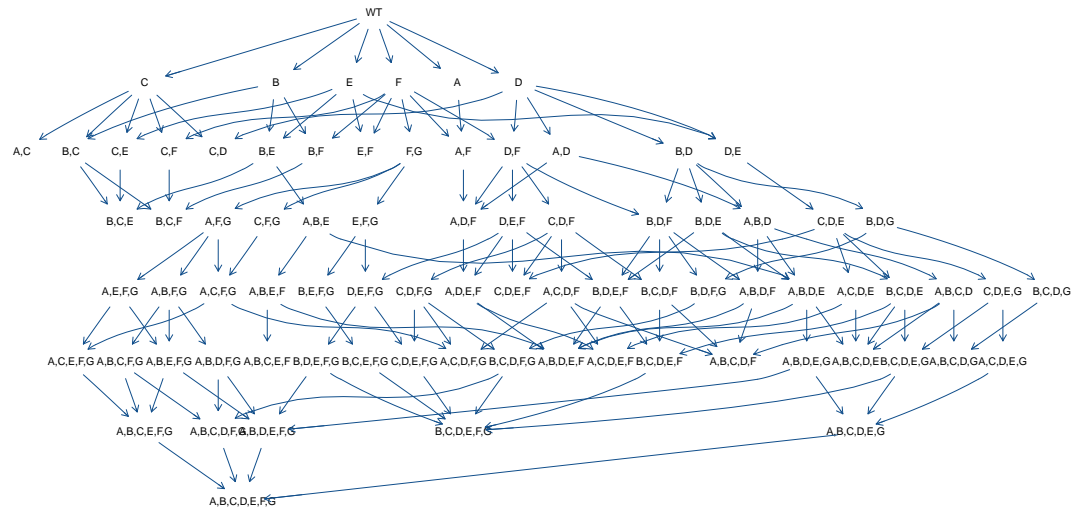



ID **tljFPA395CywDkbx**  
 acc genotypes **17**  
 peaks no back **8**  
 removed edges **NA**  
 prop rem edges **NA**

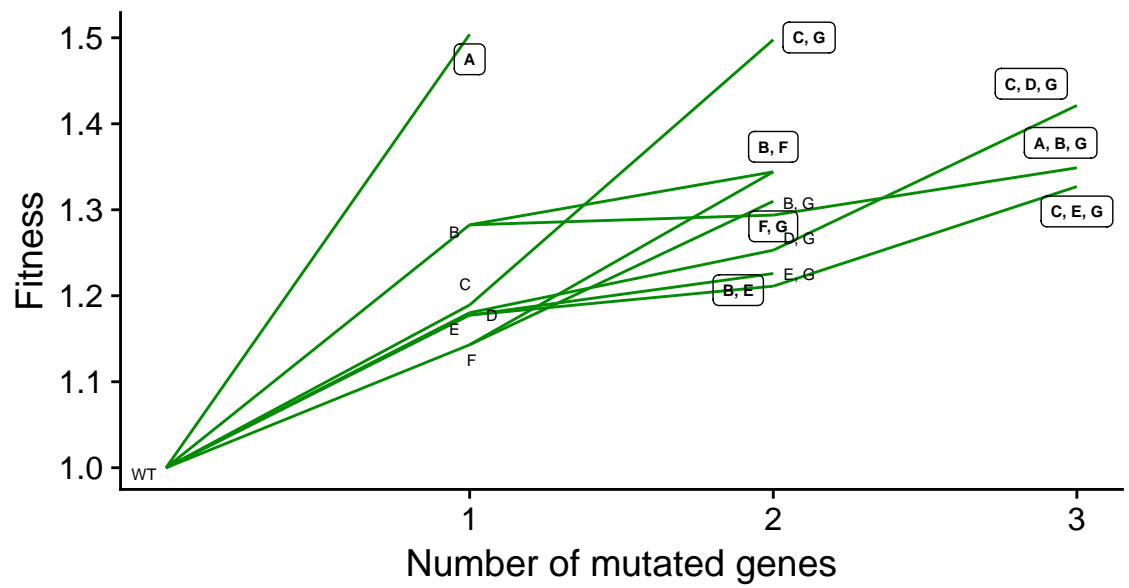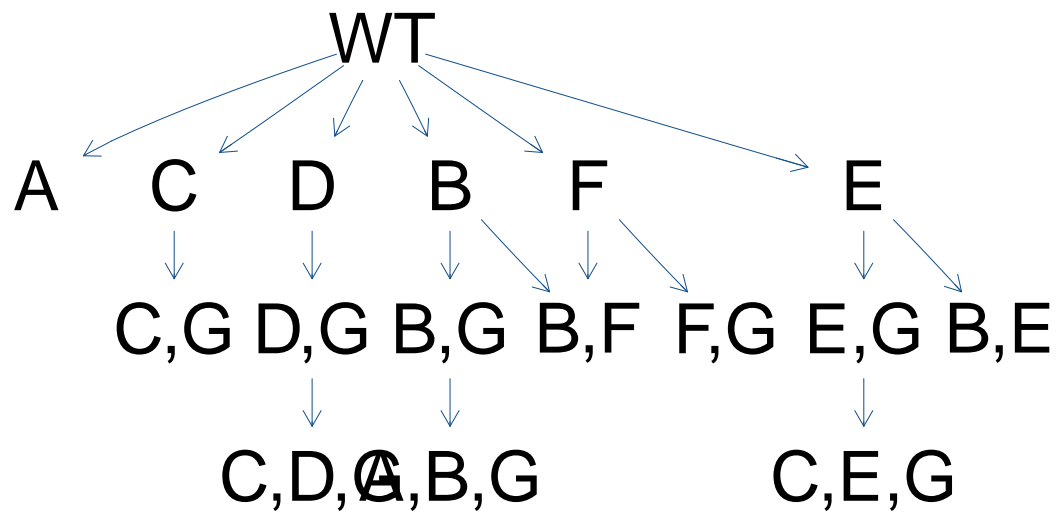

ID **TonSIXDkiuvbpNr6**  
 acc genotypes **64**  
 peaks no back **16**  
 removed edges **NA**  
 prop rem edges **NA**

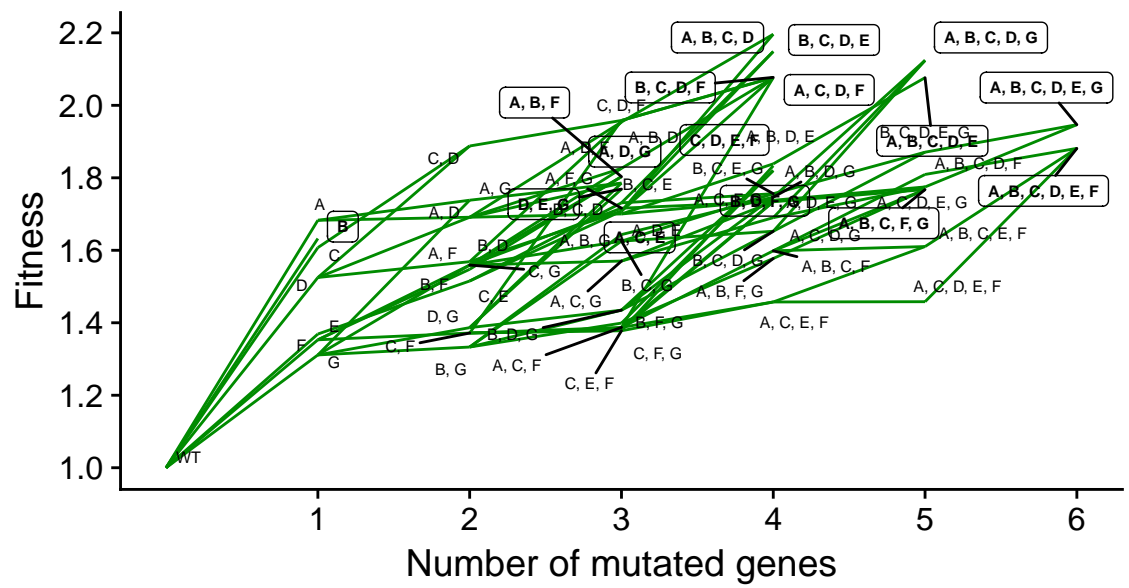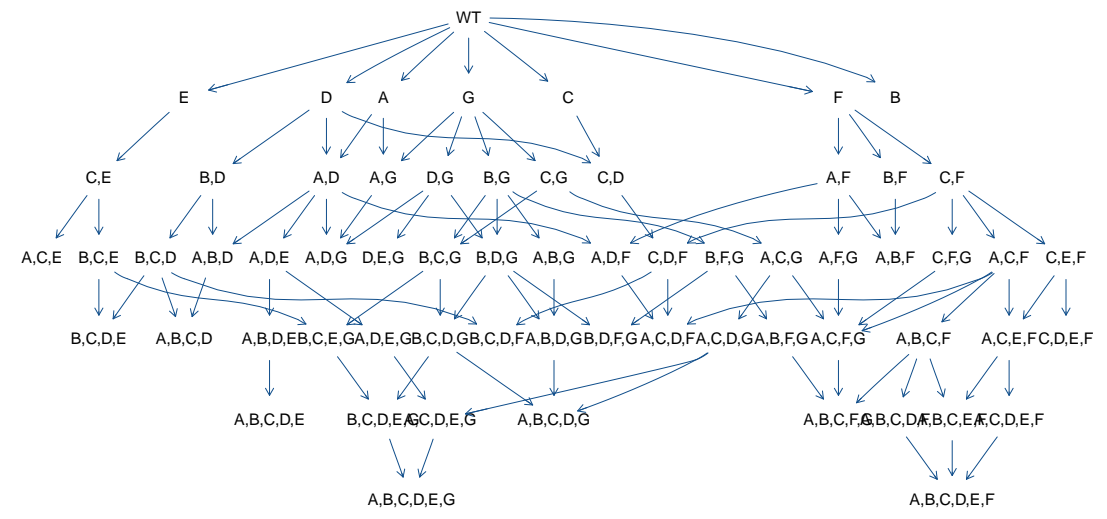

ID TuigQ6ZYersjqG8r  
 acc genotypes 19  
 peaks no back 9  
 removed edges NA  
 prop rem edges NA

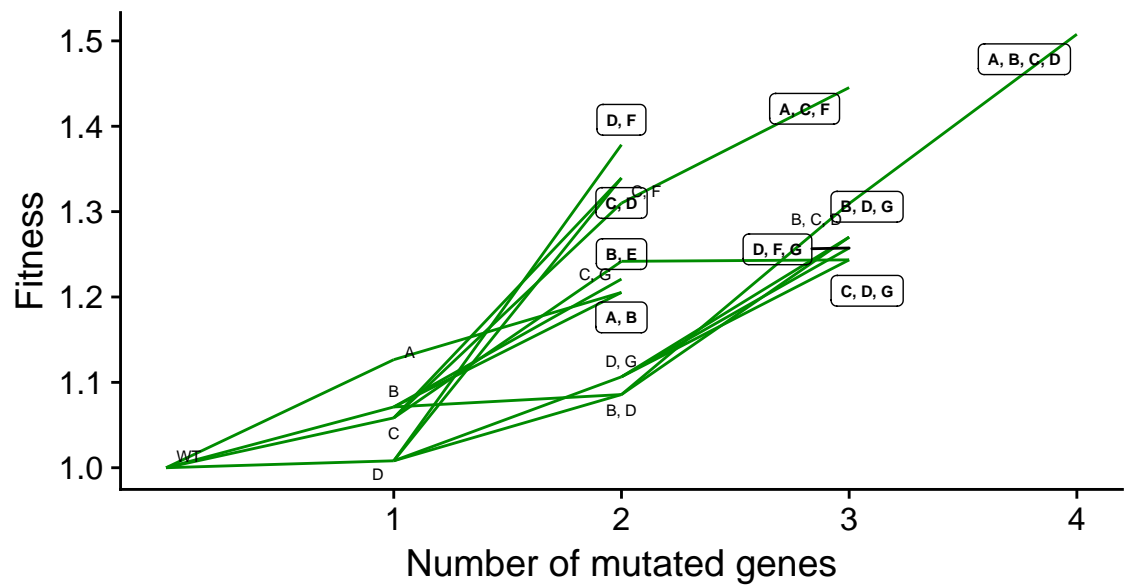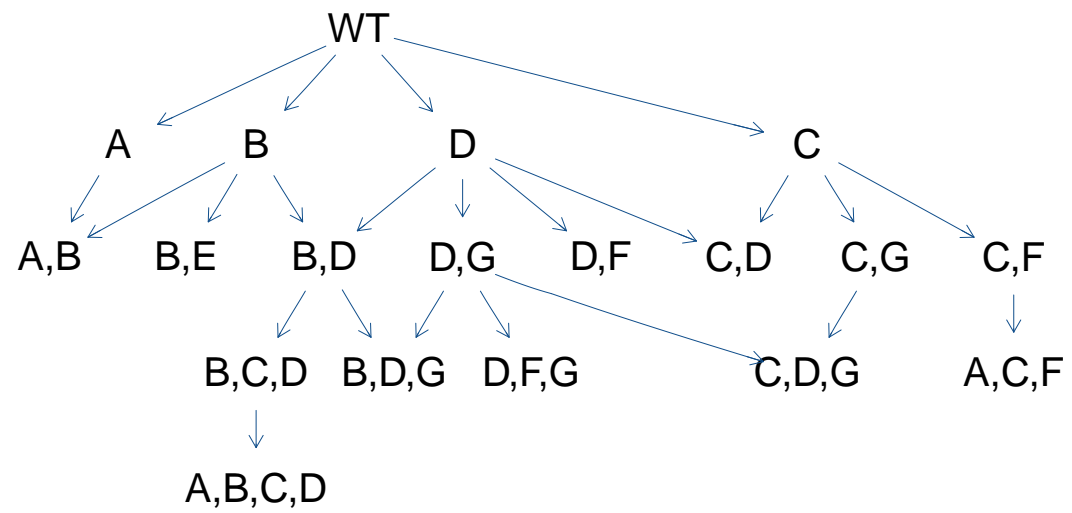

ID U2qBdGfdtF10VB9Ww  
 acc genotypes 30  
 peaks no back 12  
 removed edges NA  
 prop rem edges NA

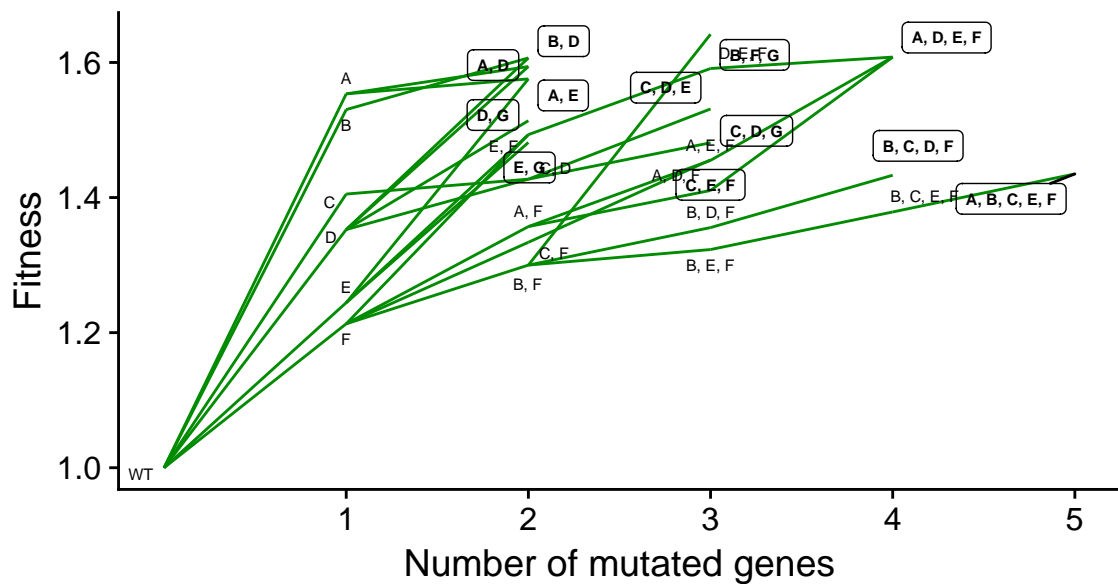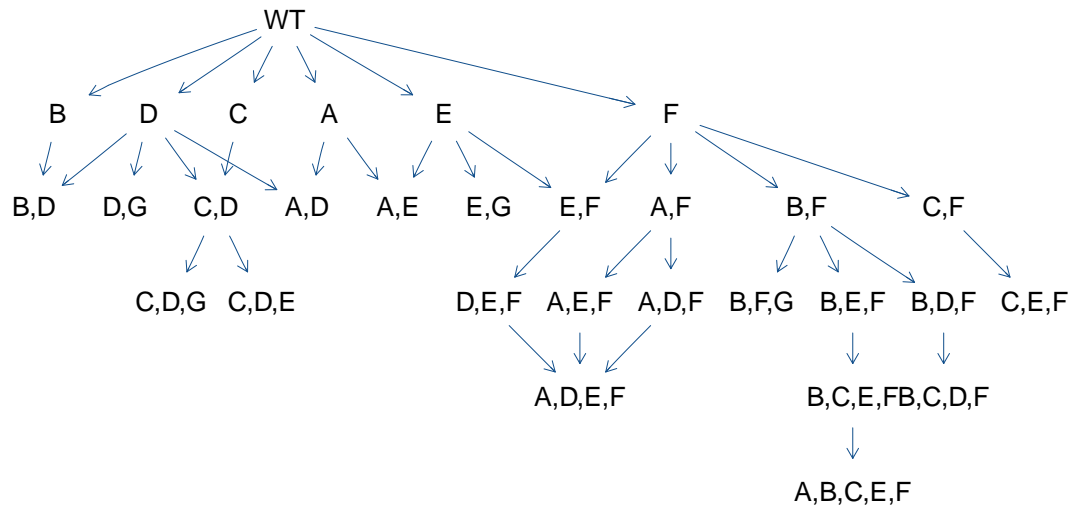



ID usBeU10iBdpLaKISX  
 acc genotypes 14  
 peaks no back 7  
 removed edges NA  
 prop rem edges NA

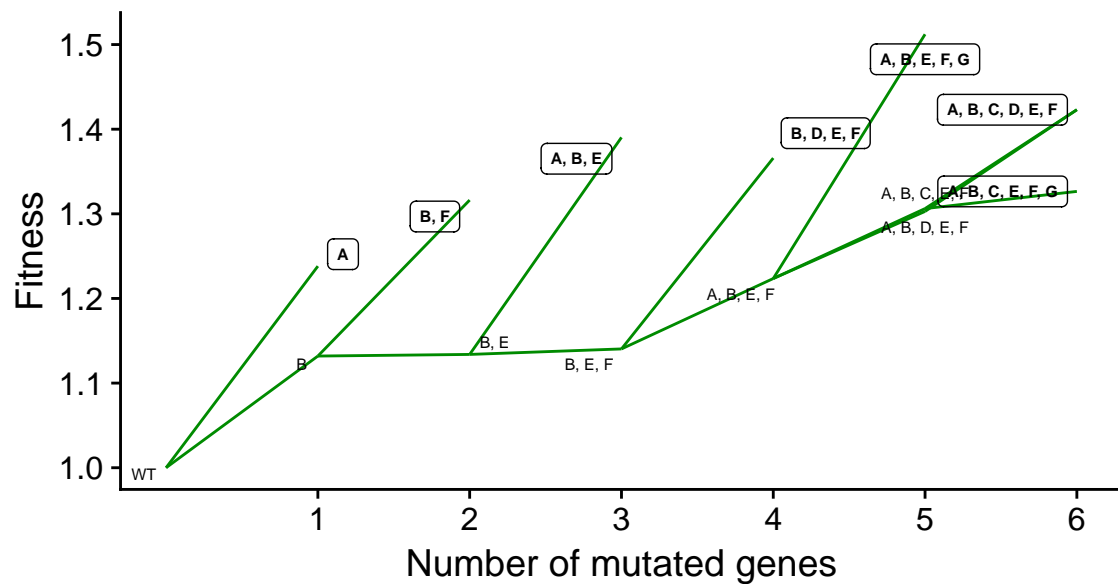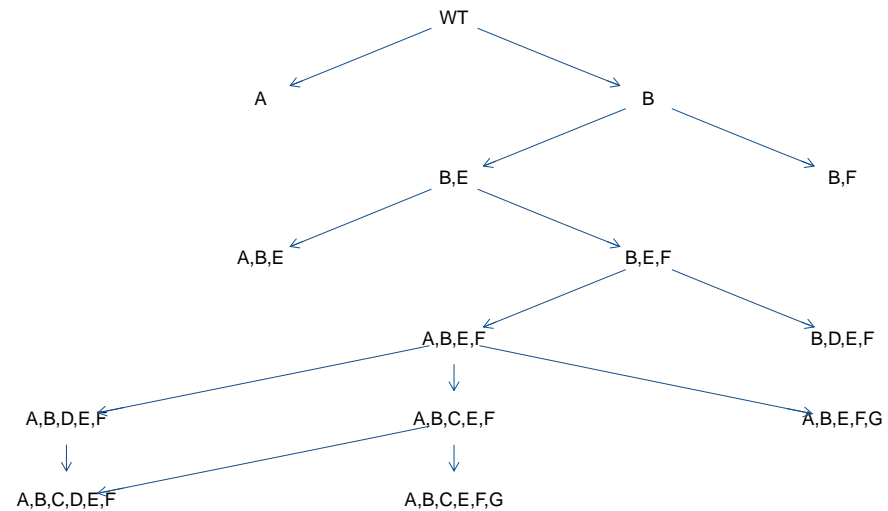

ID **uTuVU1GMy3Xg8Zye**  
 acc genotypes **43**  
 peaks no back **17**  
 removed edges **NA**  
 prop rem edges **NA**

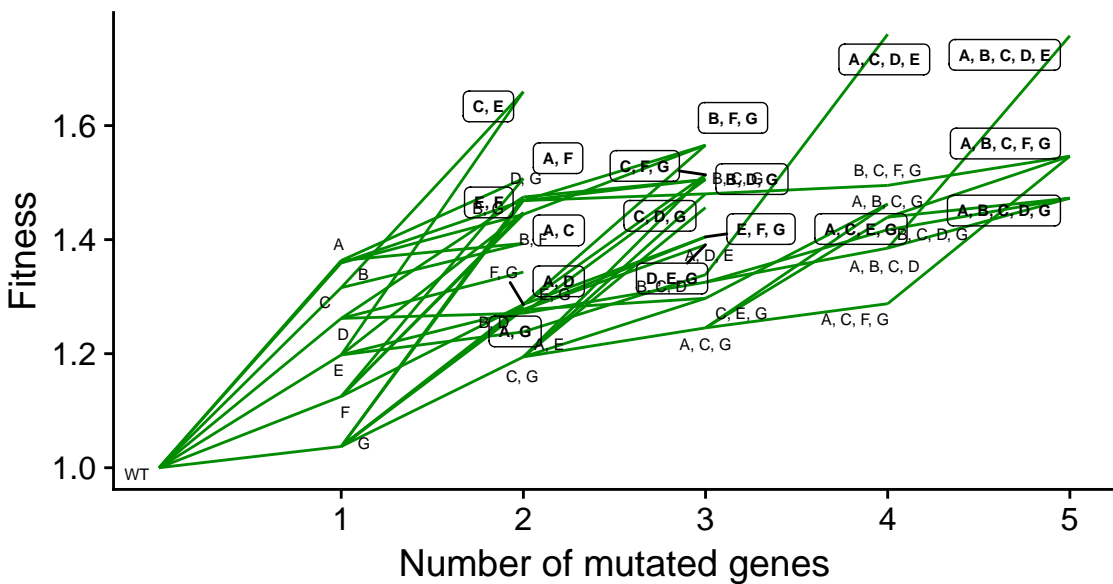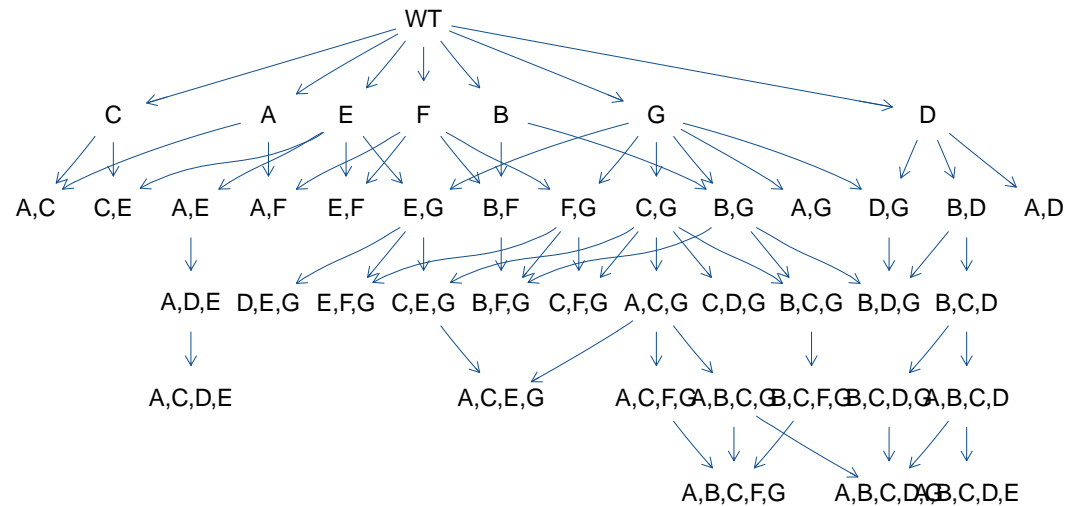

ID [uxdKQzI2TafUiD7b](#)  
 acc genotypes 42  
 peaks no back 17  
 removed edges NA  
 prop rem edges NA

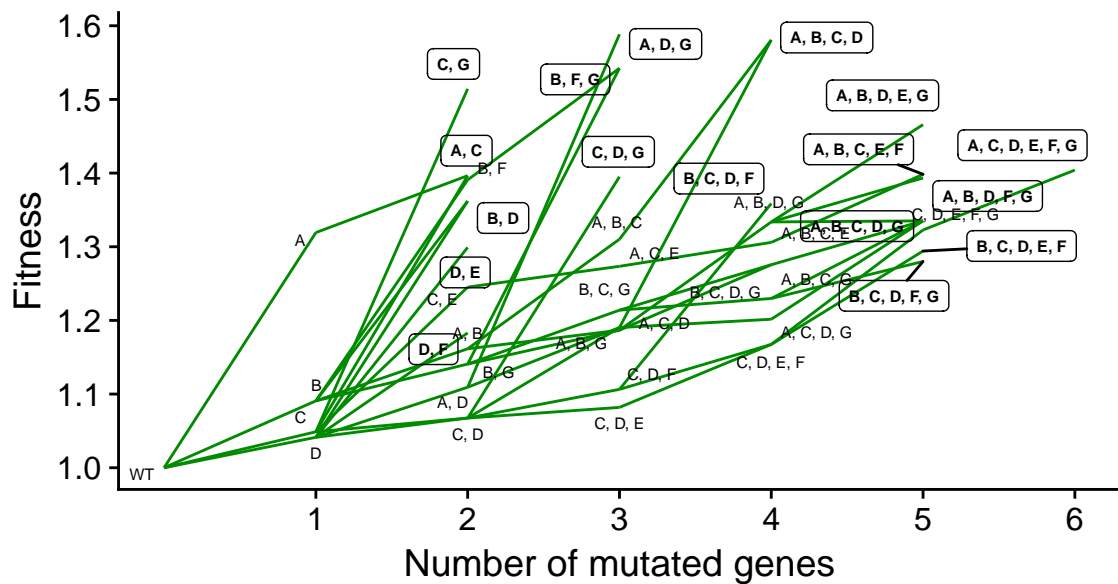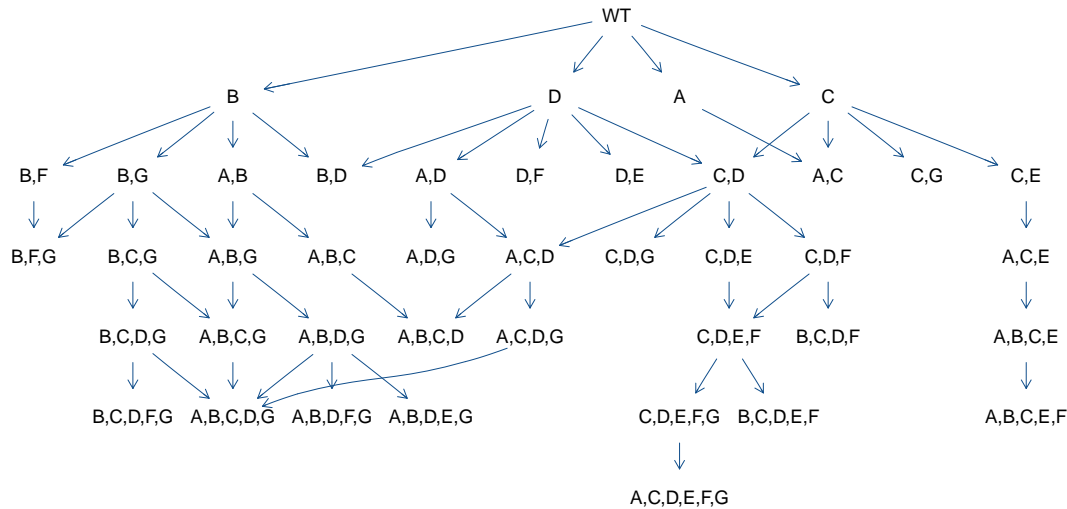



ID vFhJDZxTJ3k4epfY  
 acc genotypes 49  
 peaks no back 19  
 removed edges NA  
 prop rem edges NA

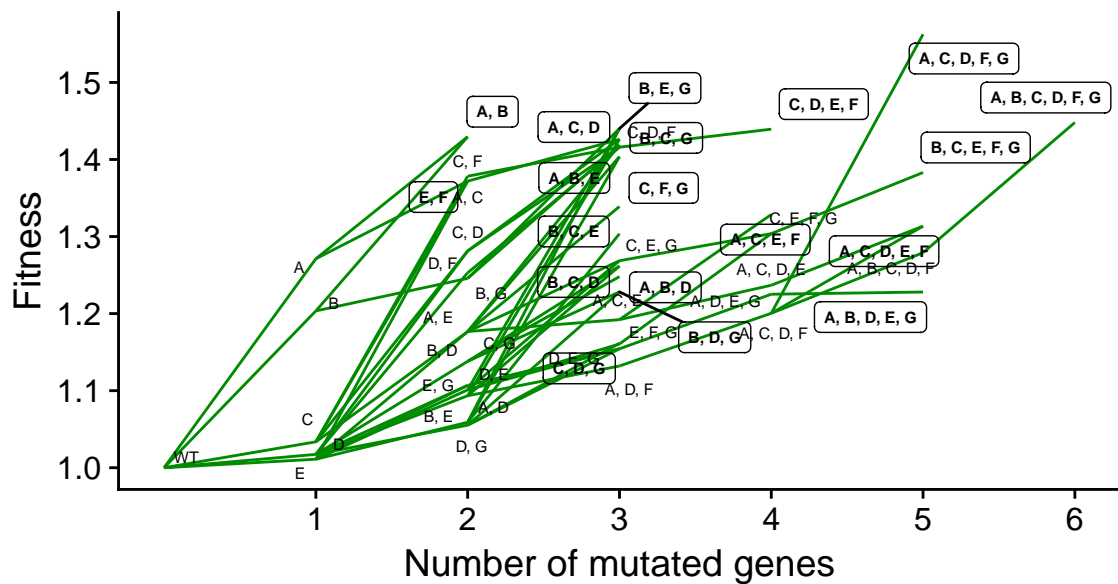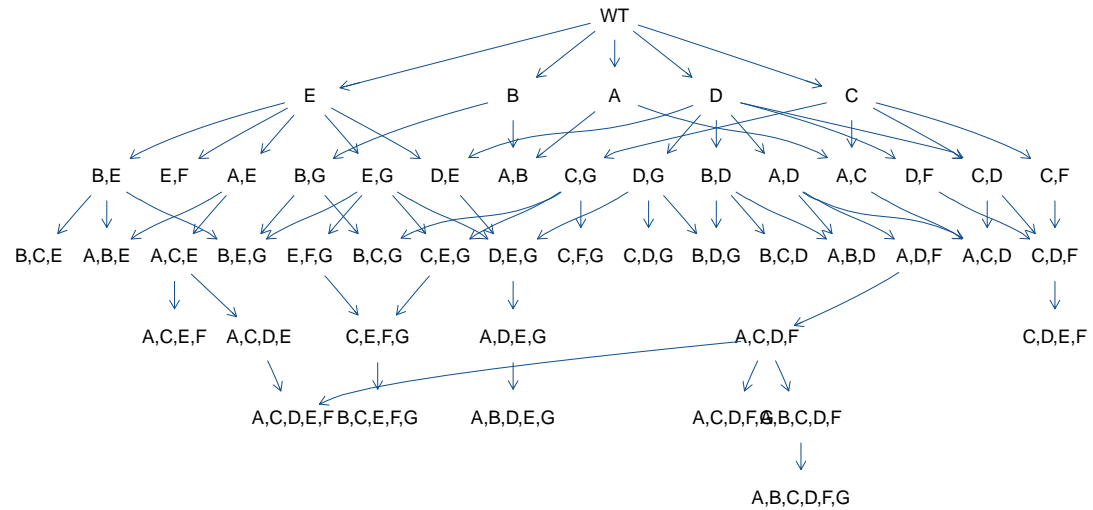

ID **vmQ3luxZBIZ10PMCg**  
 acc genotypes **25**  
 peaks no back **9**  
 removed edges **NA**  
 prop rem edges **NA**

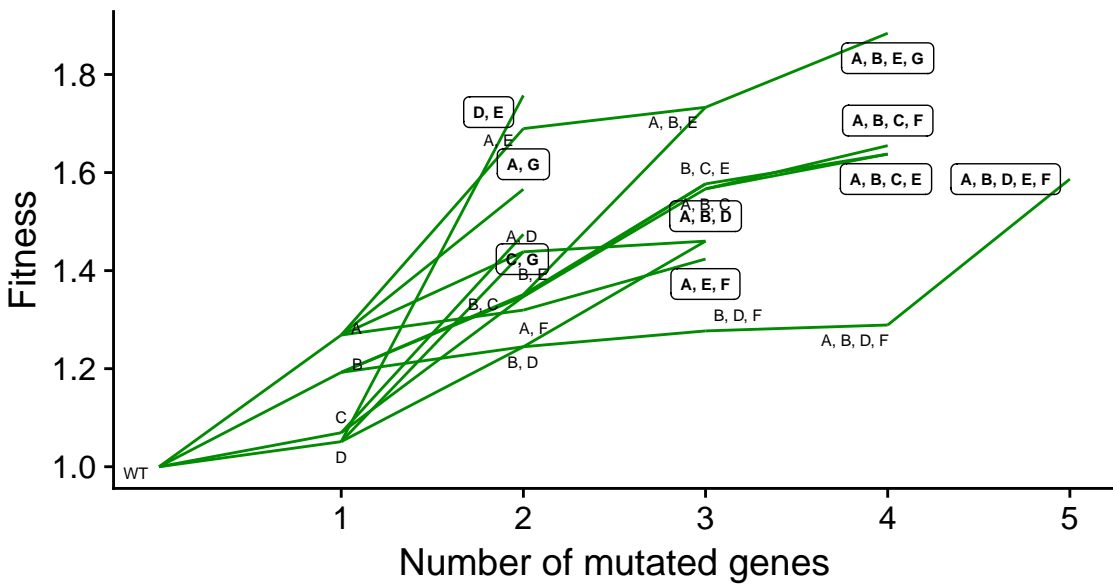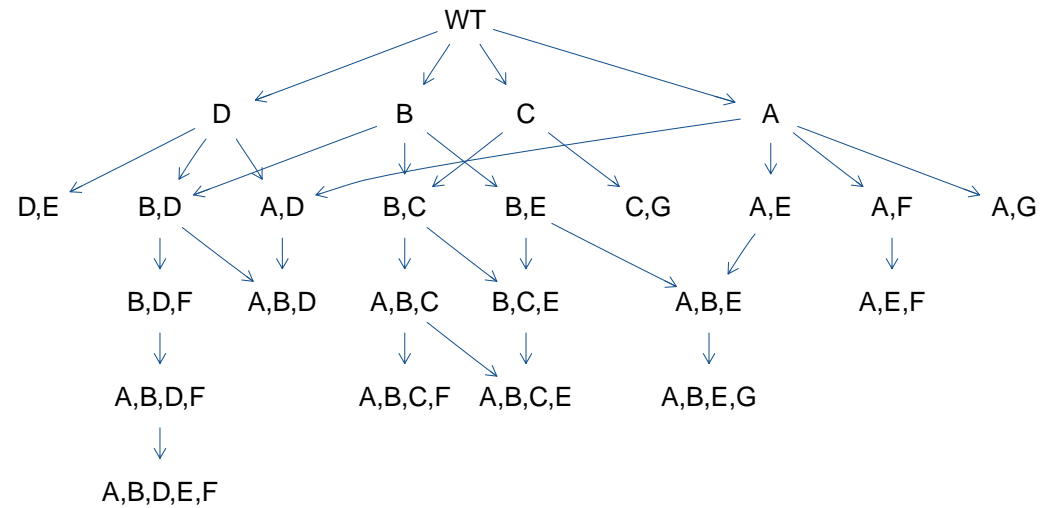

ID vt56Tsvc76JVWmej  
 acc genotypes 20  
 peaks no back 5  
 removed edges NA  
 prop rem edges NA

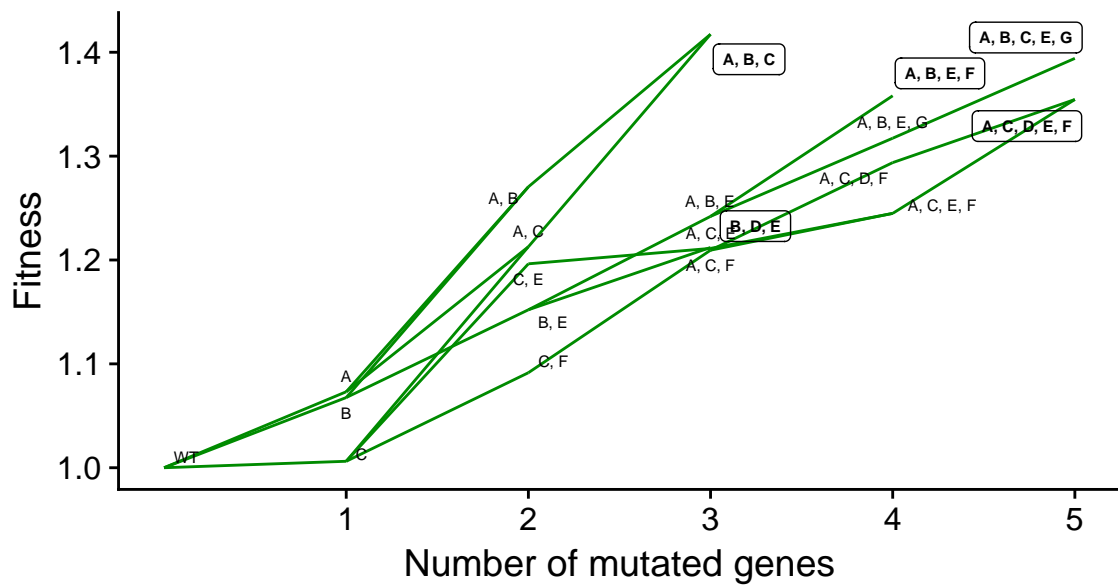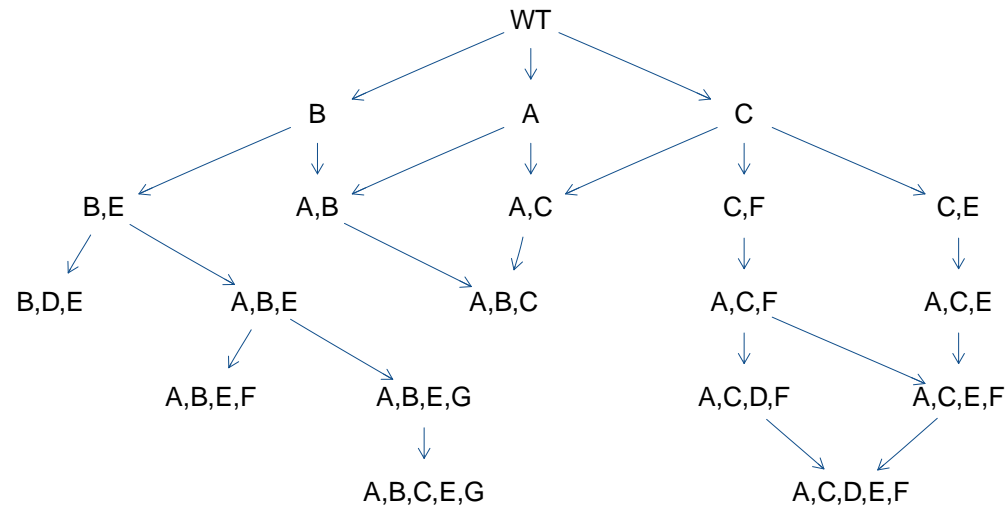

ID vweucMX7s10v2ZeDw  
 acc genotypes 57  
 peaks no back 13  
 removed edges NA  
 prop rem edges NA

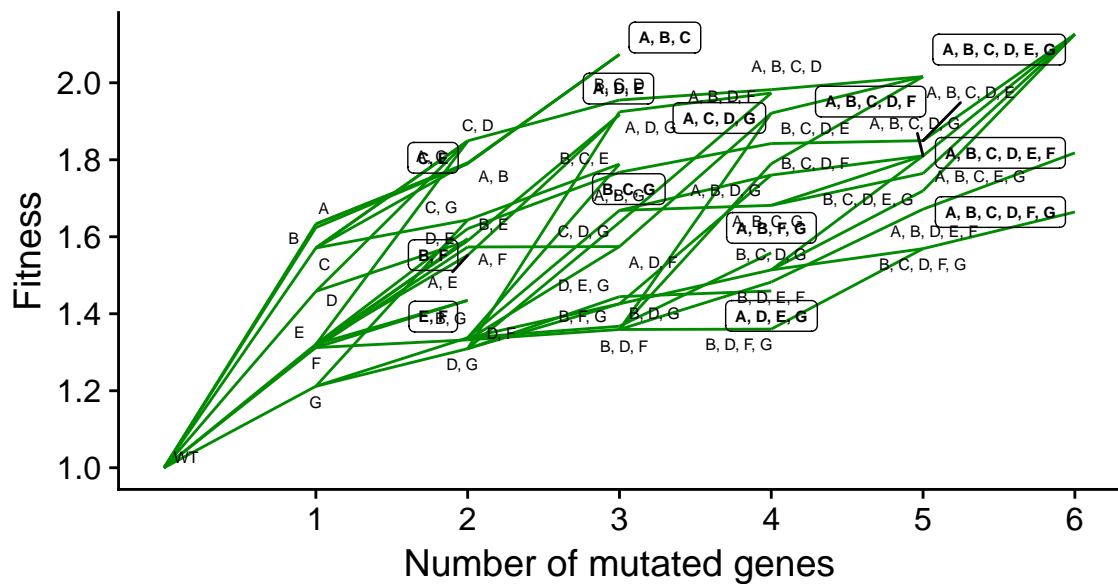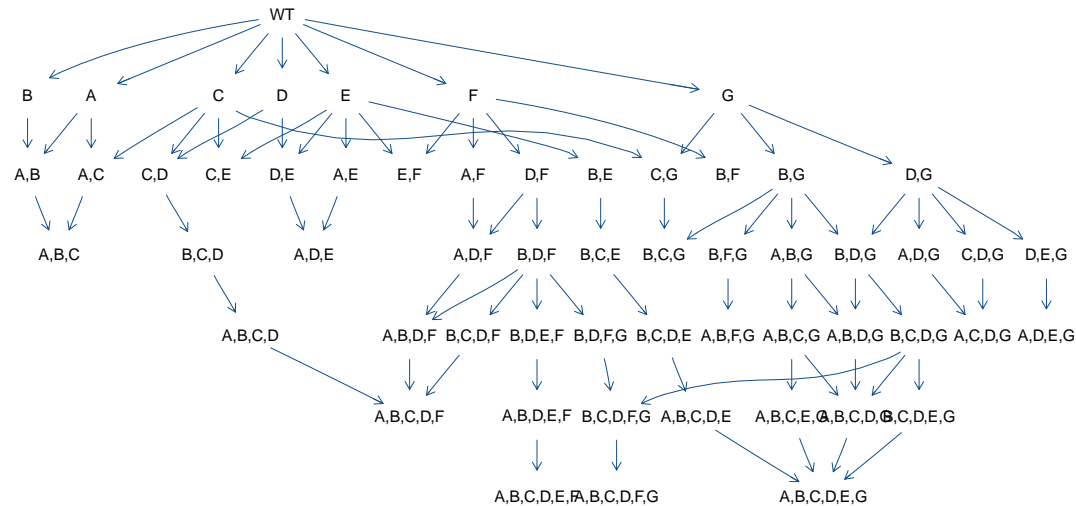

ID [w3y65lfSHEfh1Qrj](#)  
 acc genotypes 45  
 peaks no back 15  
 removed edges NA  
 prop rem edges NA

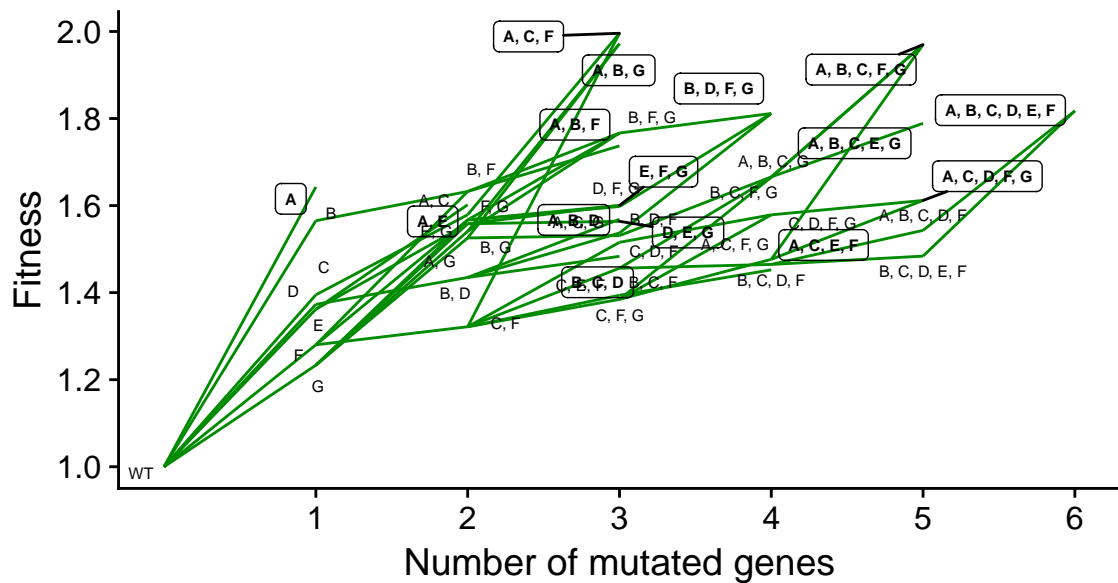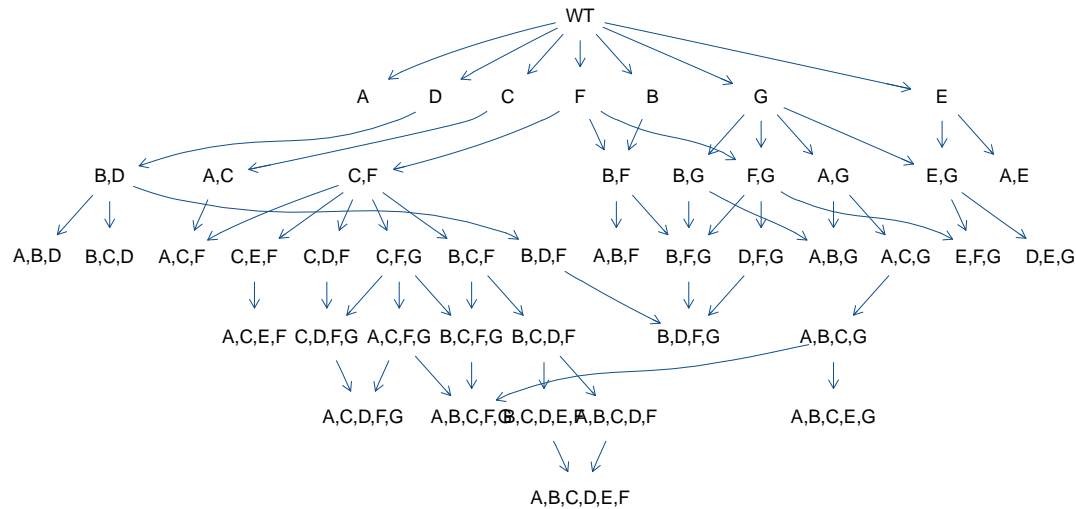

ID W7VVpn96d4J5b6gp  
 acc genotypes 43  
 peaks no back 13  
 removed edges NA  
 prop rem edges NA

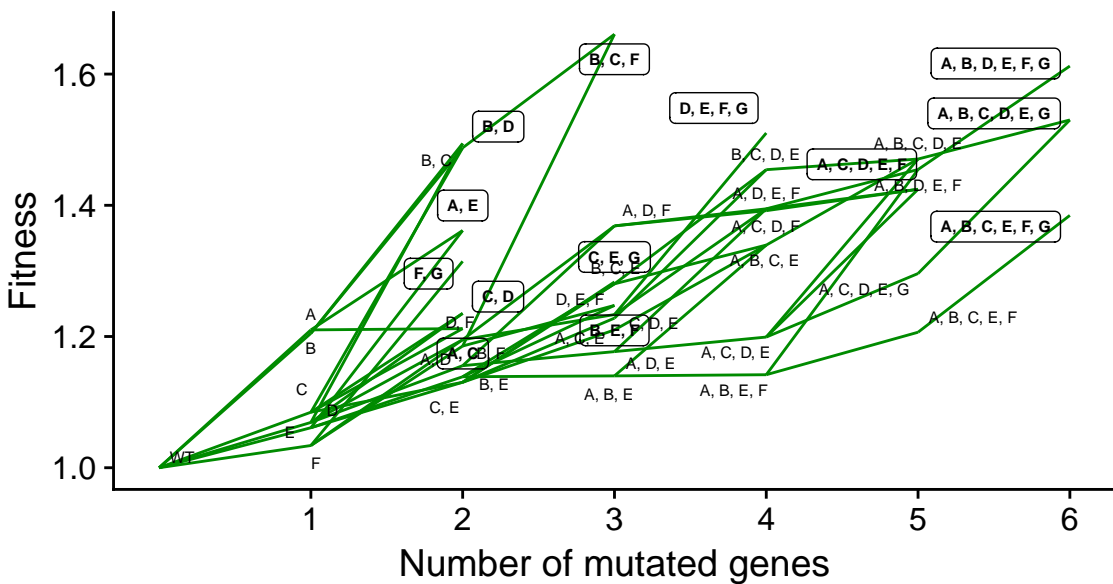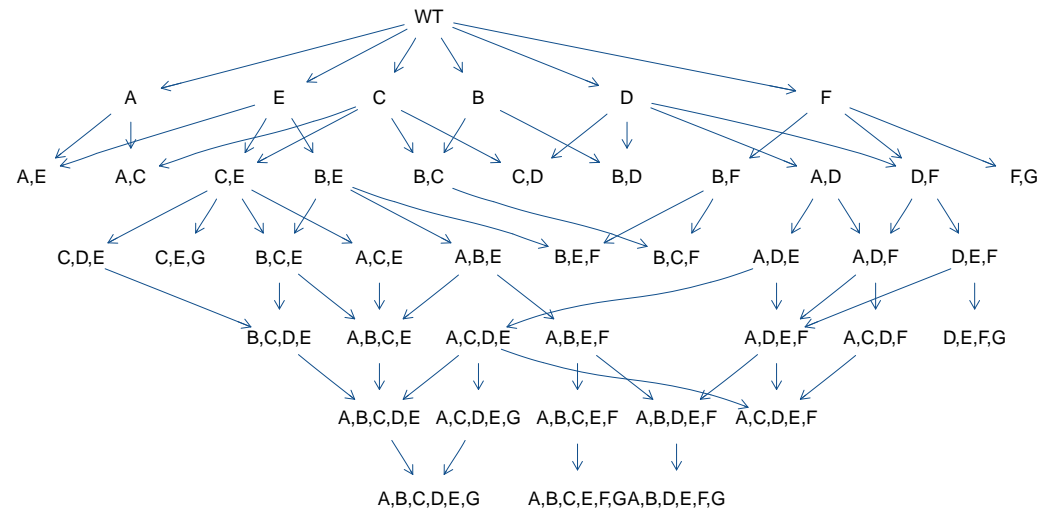



ID WTbc1BmerHlsalgq  
 acc genotypes 38  
 peaks no back 15  
 removed edges NA  
 prop rem edges NA

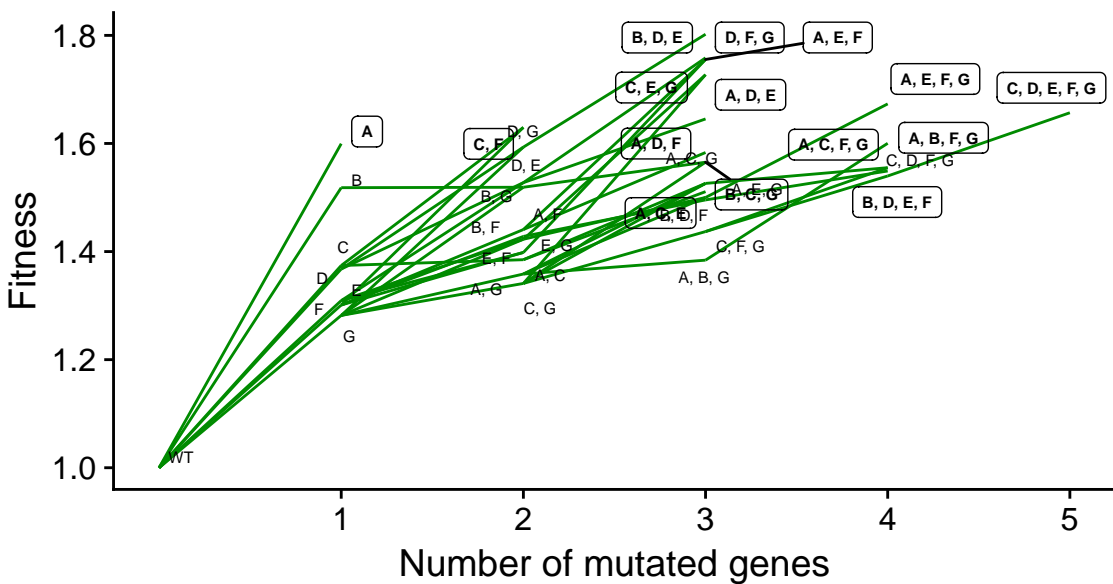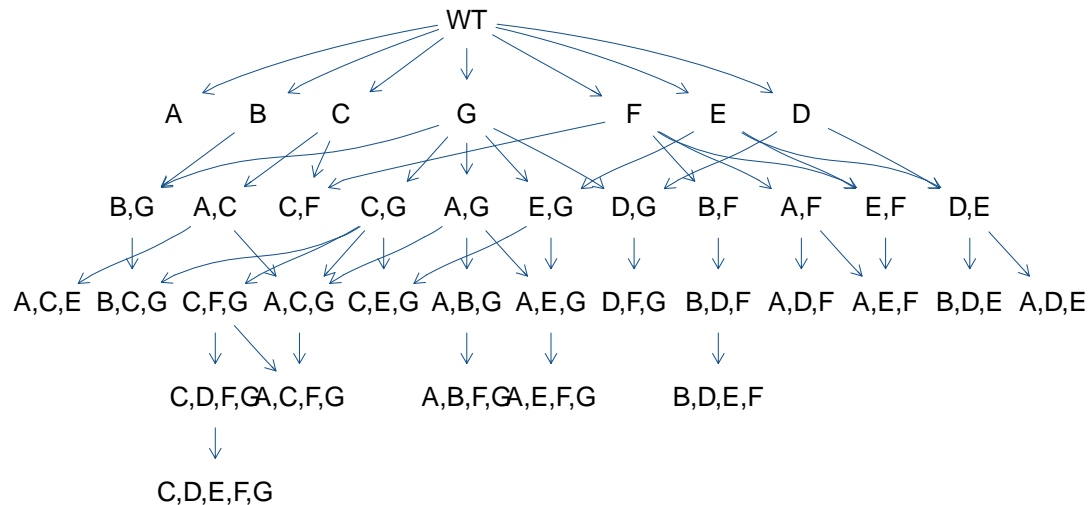





ID WXvNSe1IPVS5wf7B  
 acc genotypes 46  
 peaks no back 14  
 removed edges NA  
 prop rem edges NA

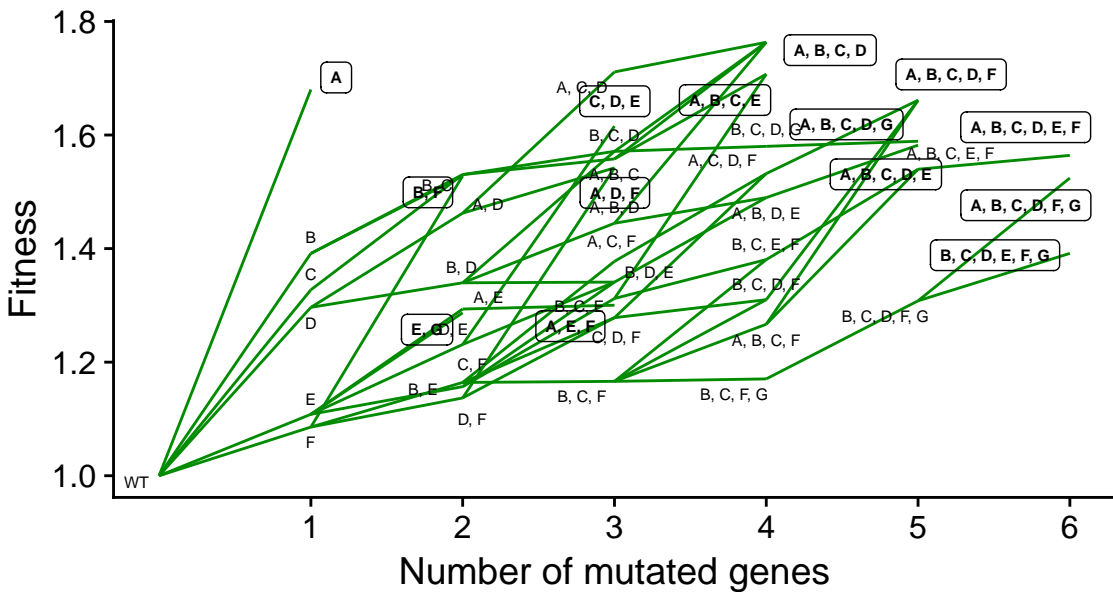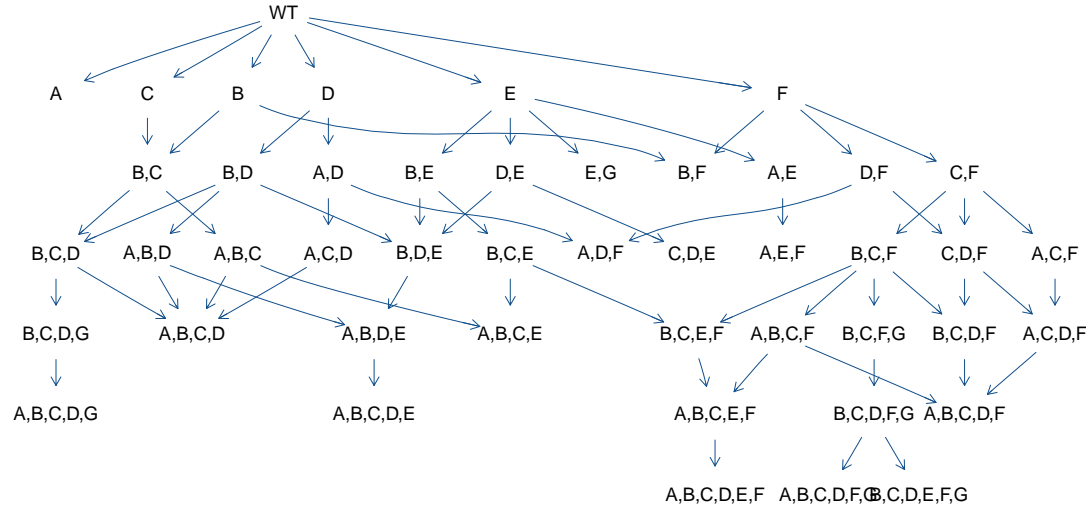

ID x4ZFzf8D5q4Z4anR  
 acc genotypes 11  
 peaks no back 4  
 removed edges NA  
 prop rem edges NA

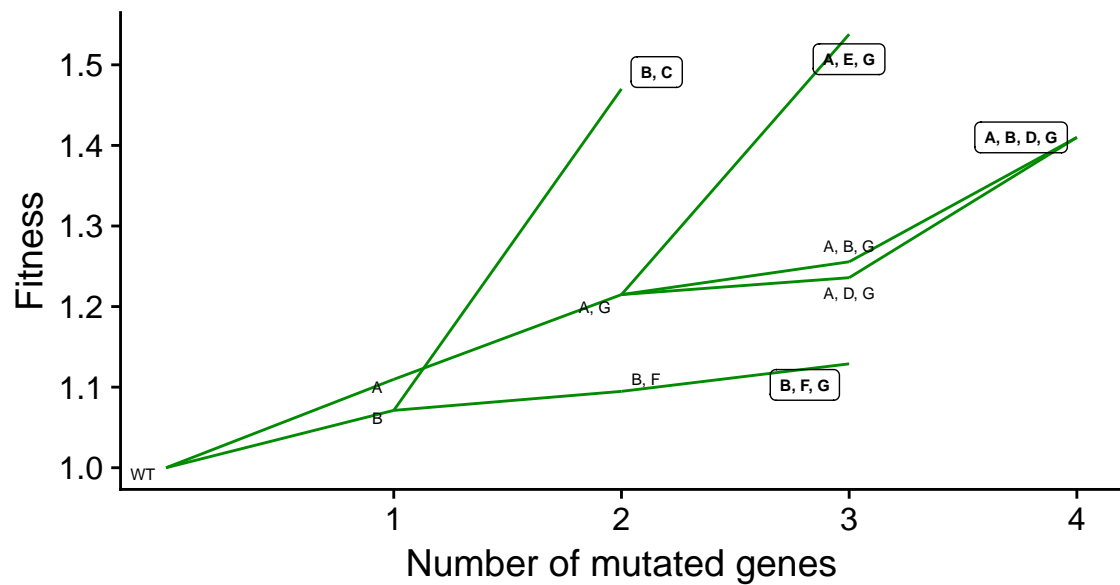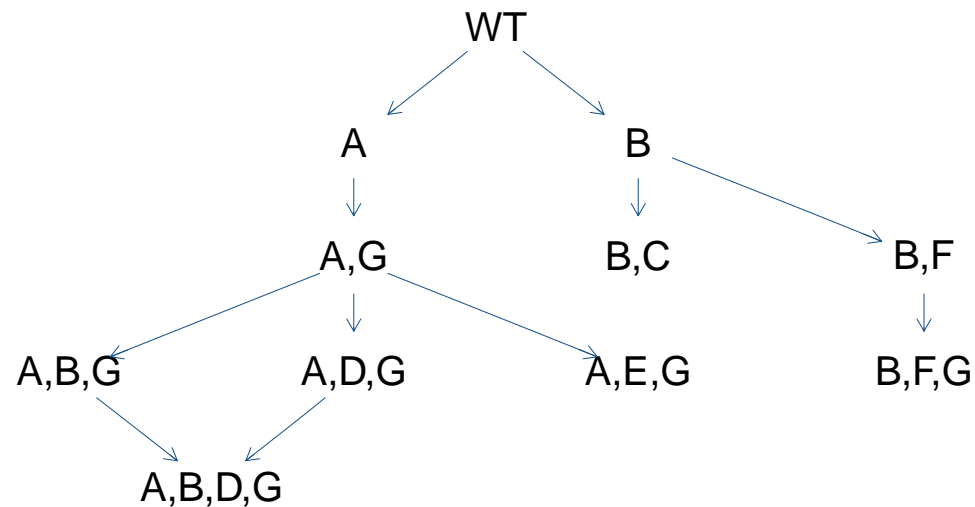

ID x53klSylIWMWcjly  
 acc genotypes 22  
 peaks no back 6  
 removed edges NA  
 prop rem edges NA

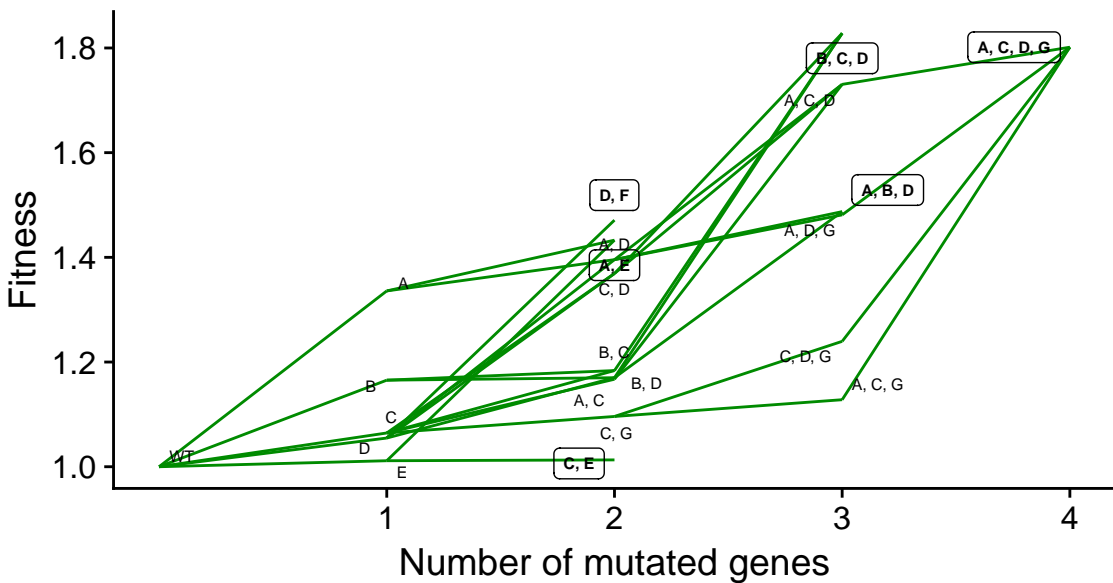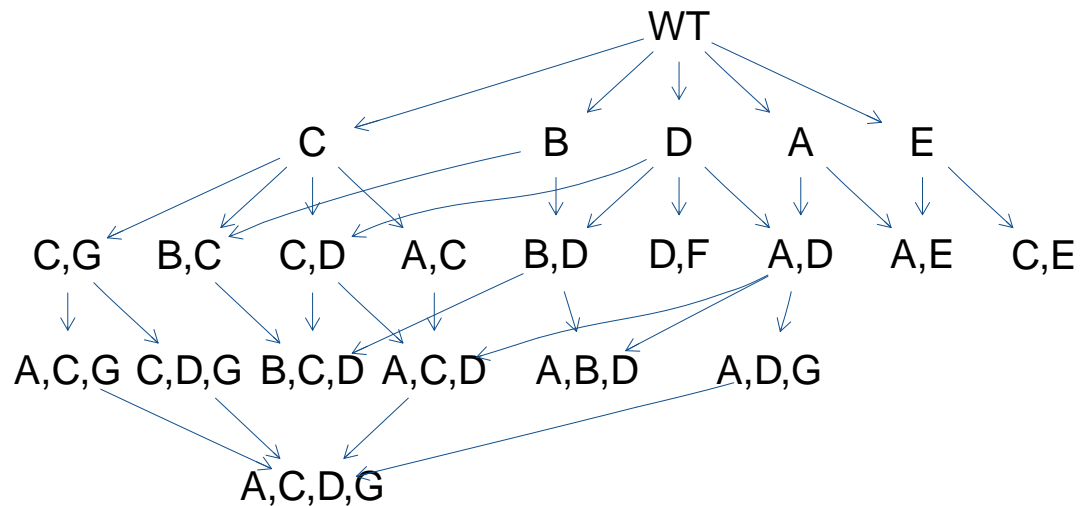

ID x63vO10FZvDdTuarD  
 acc genotypes 20  
 peaks no back 9  
 removed edges NA  
 prop rem edges NA

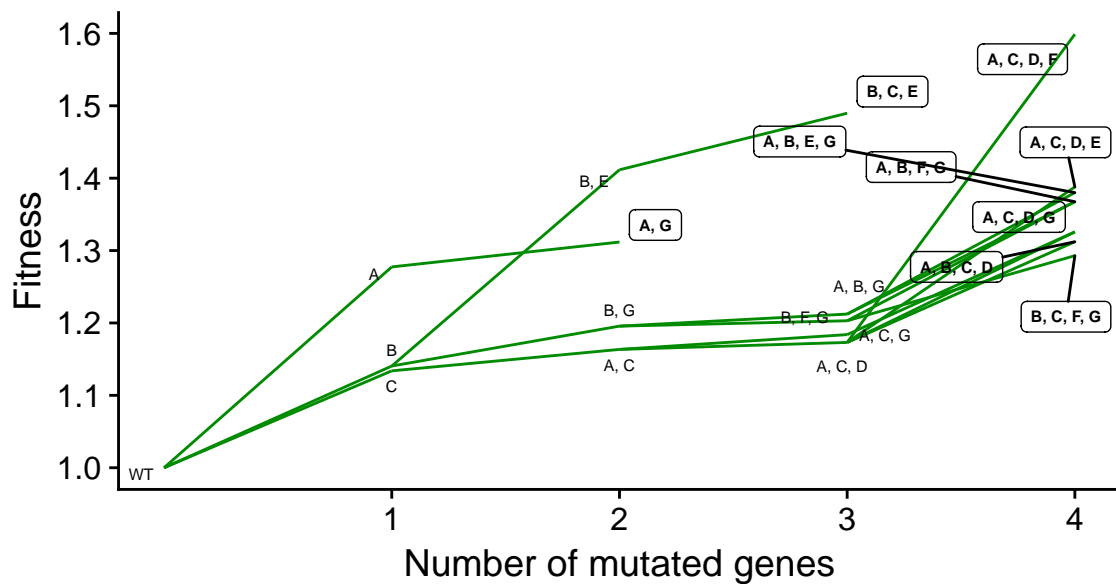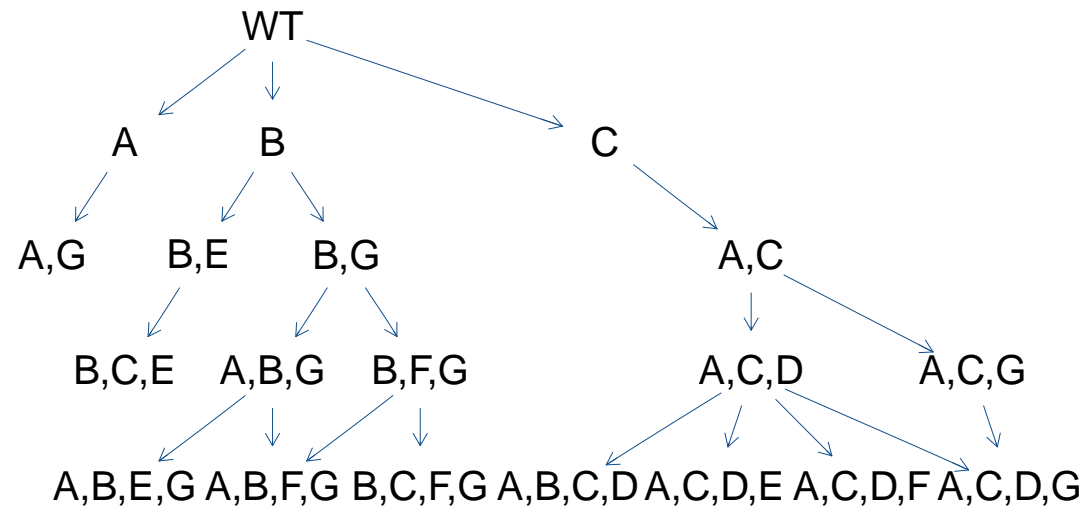

ID XhJcAoB3WdJKttP7  
 acc genotypes 55  
 peaks no back 21  
 removed edges NA  
 prop rem edges NA

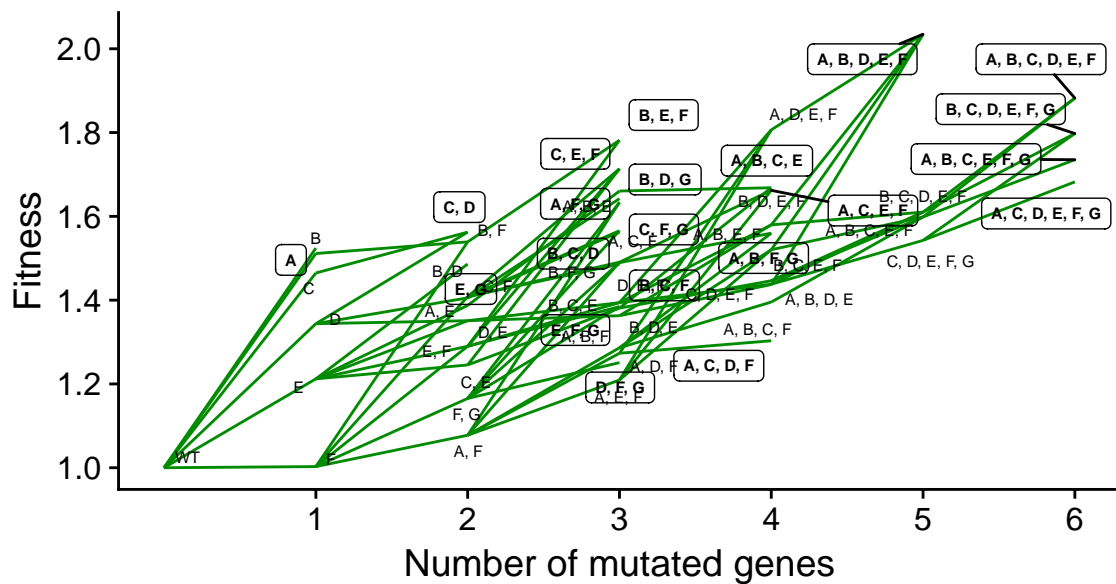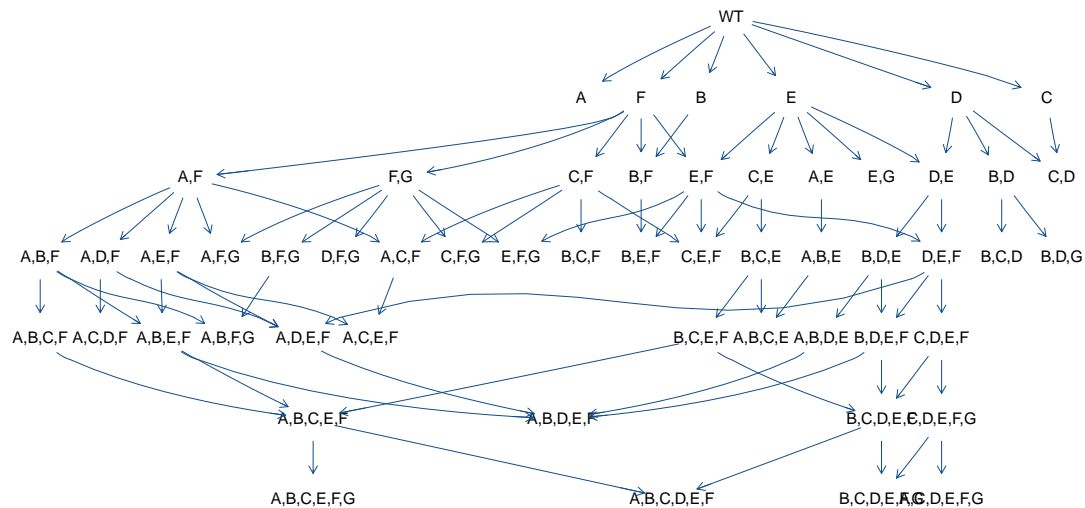

ID xp6hoPCA8glPKMzG  
 acc genotypes 62  
 peaks no back 16  
 removed edges NA  
 prop rem edges NA

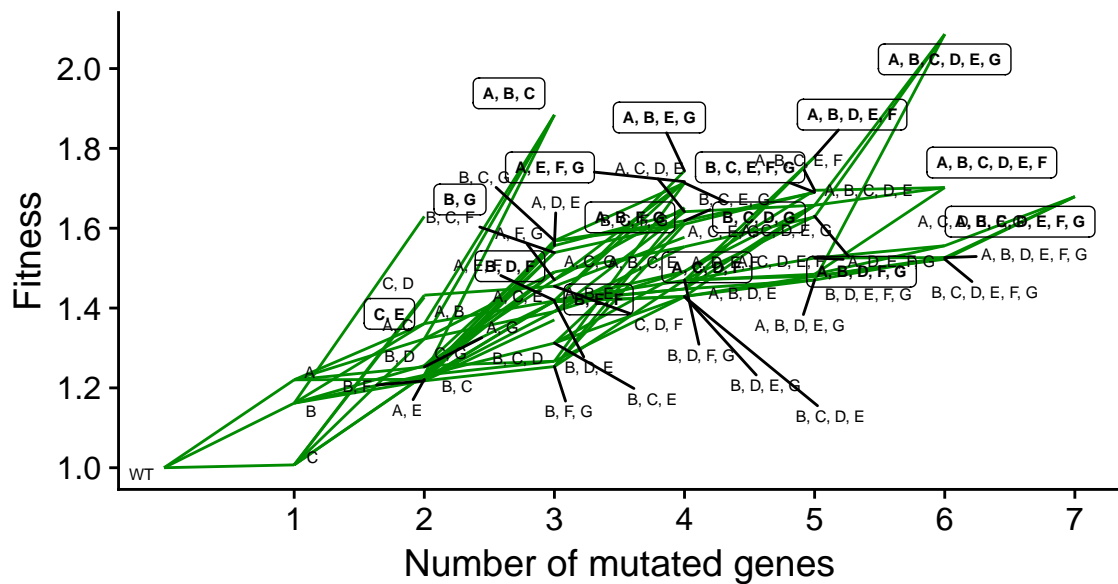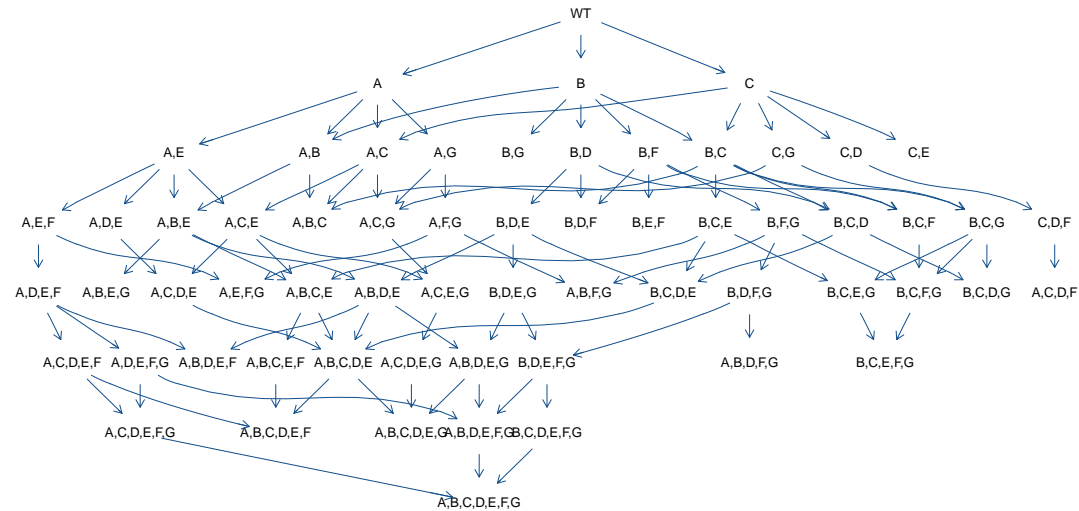

ID xU2TICTIsth9hYb3  
 acc genotypes 23  
 peaks no back 7  
 removed edges NA  
 prop rem edges NA

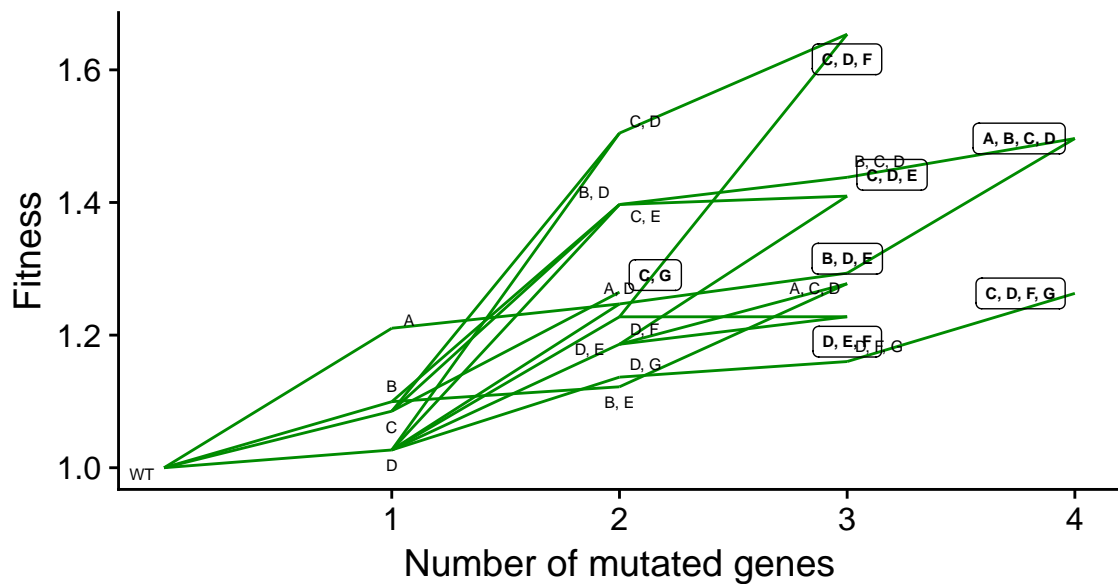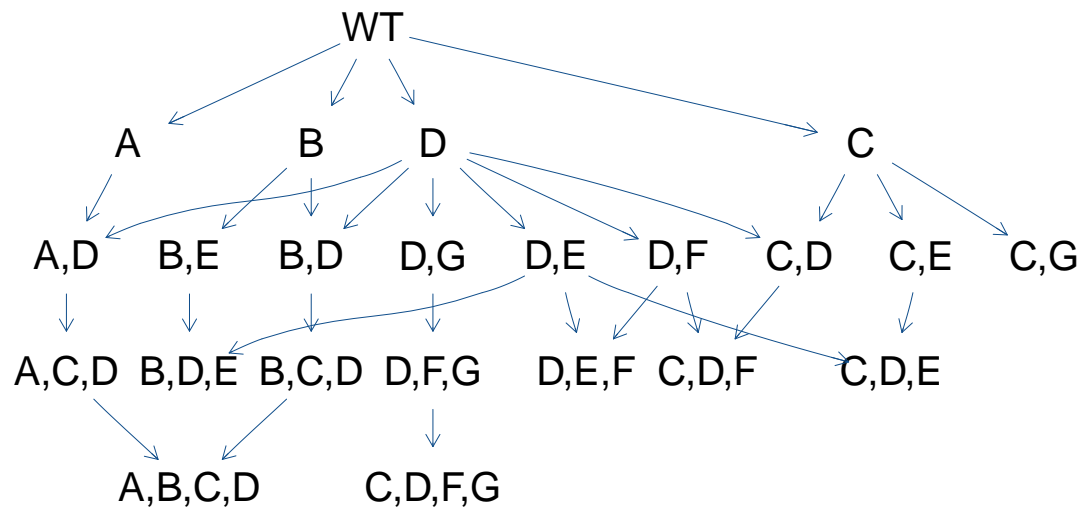





ID Y8pEsk1p3jDN3PC  
 acc genotypes 16  
 peaks no back 7  
 removed edges NA  
 prop rem edges NA

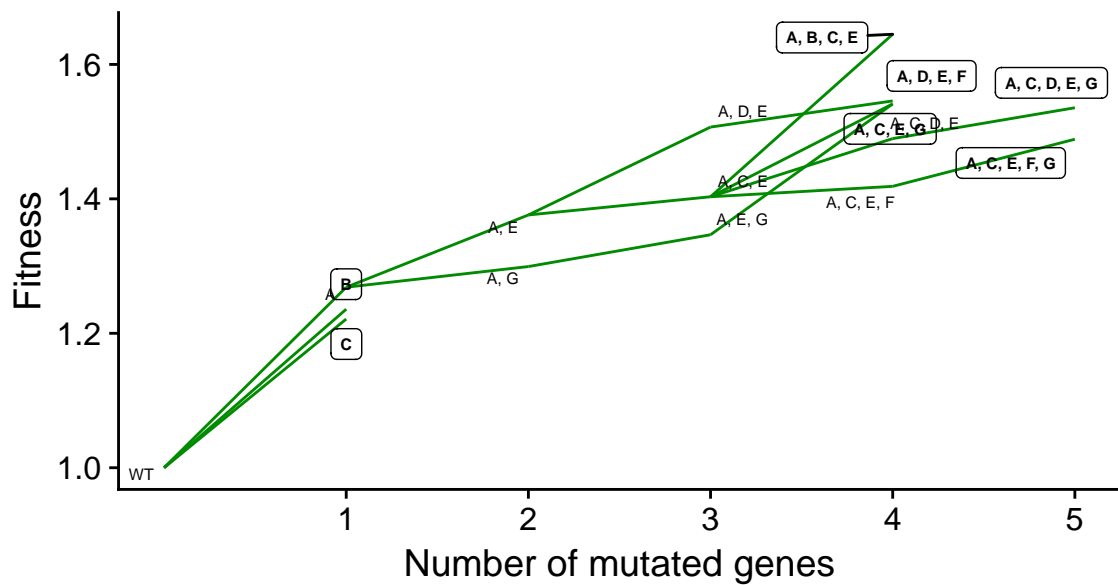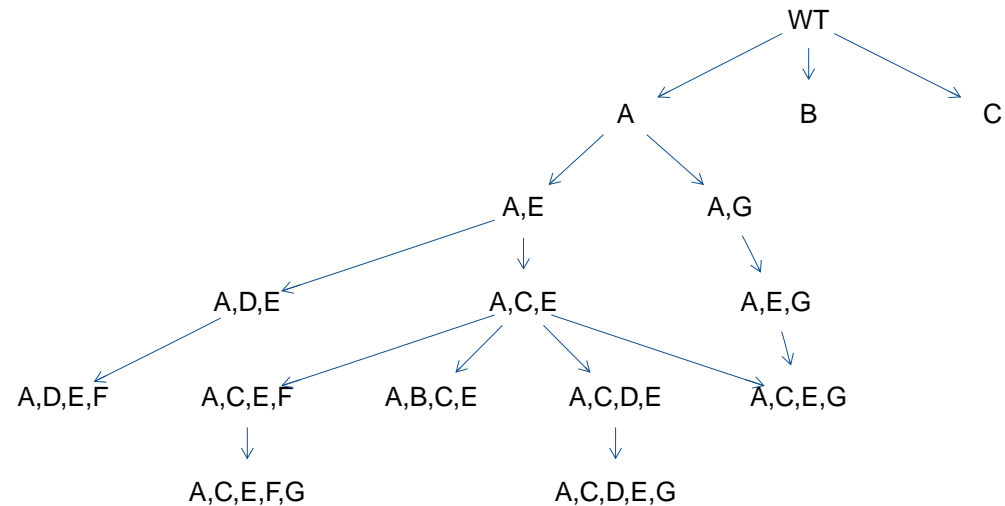







ID YuMhOqw10Xkx33JOs  
 acc genotypes 61  
 peaks no back 17  
 removed edges NA  
 prop rem edges NA

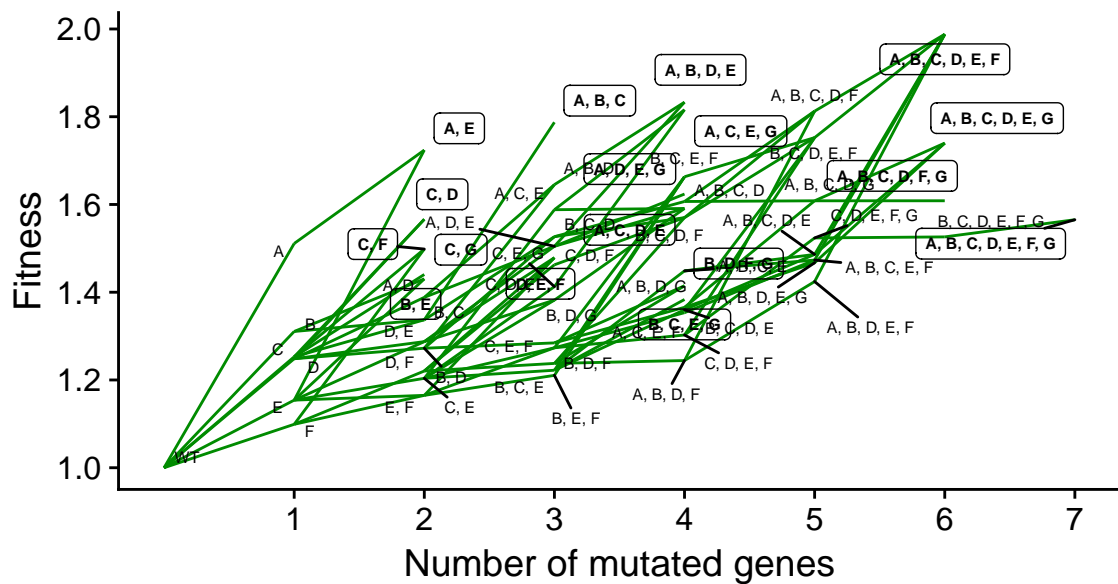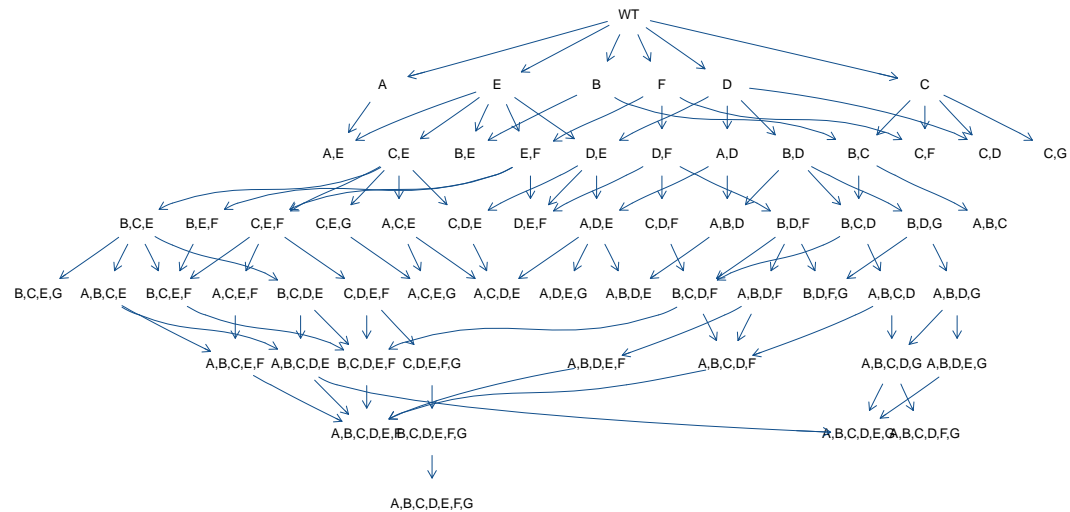

ID yYOyPKhI3NOTcbHe  
 acc genotypes 50  
 peaks no back 18  
 removed edges NA  
 prop rem edges NA

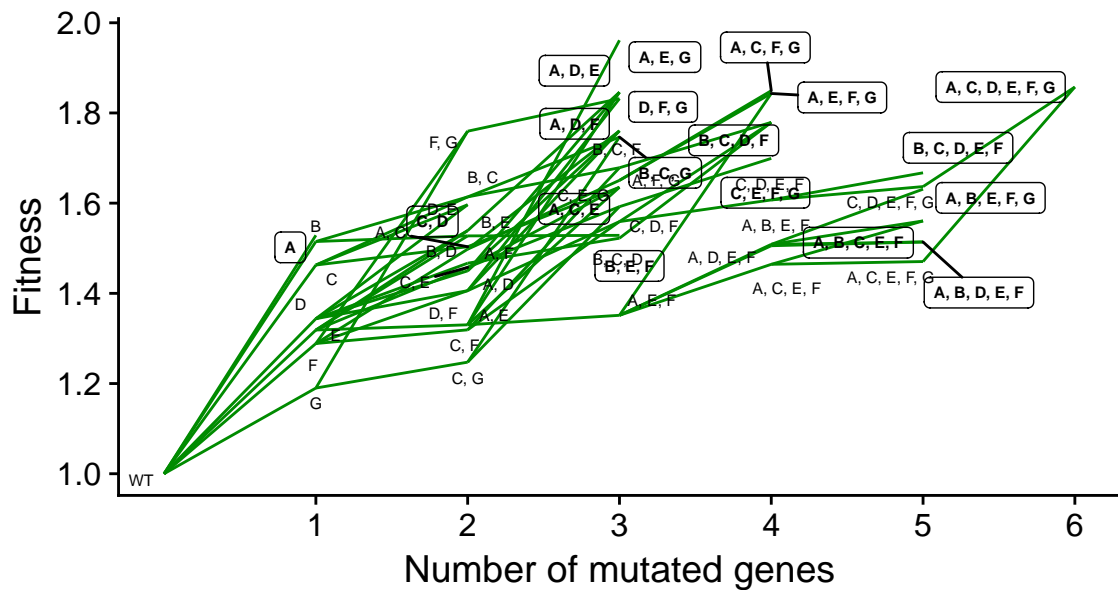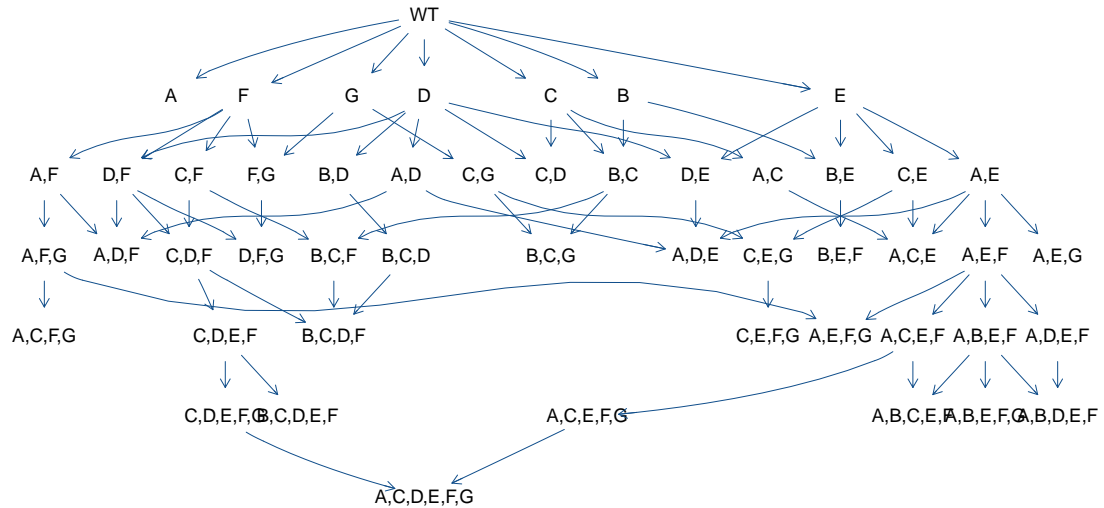

ID Z10gb2ZT22WwOQVNk  
 acc genotypes 30  
 peaks no back 12  
 removed edges NA  
 prop rem edges NA

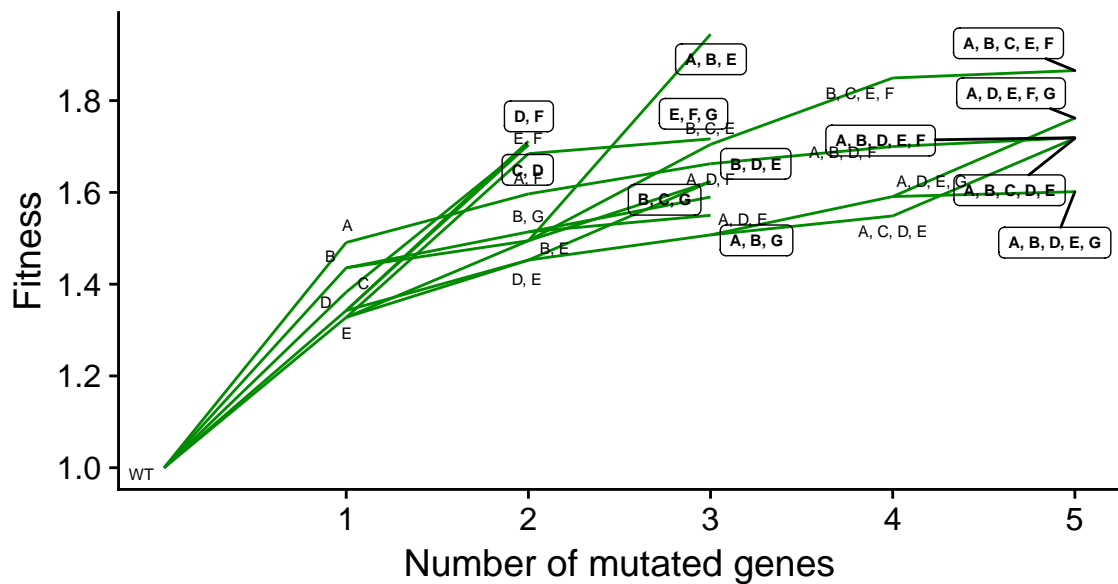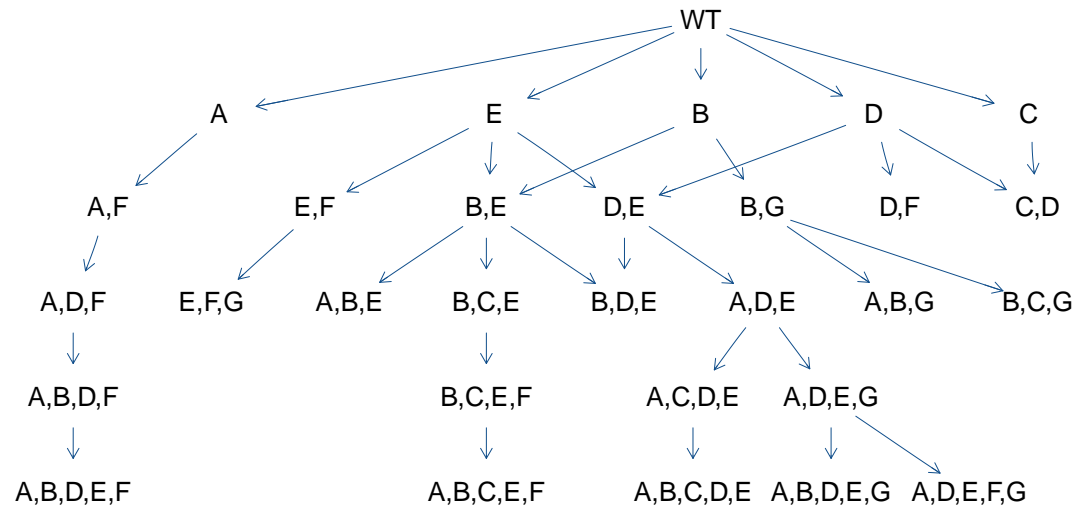



ID Z7IpusjT8G9uuSKU  
 acc genotypes 59  
 peaks no back 18  
 removed edges NA  
 prop rem edges NA

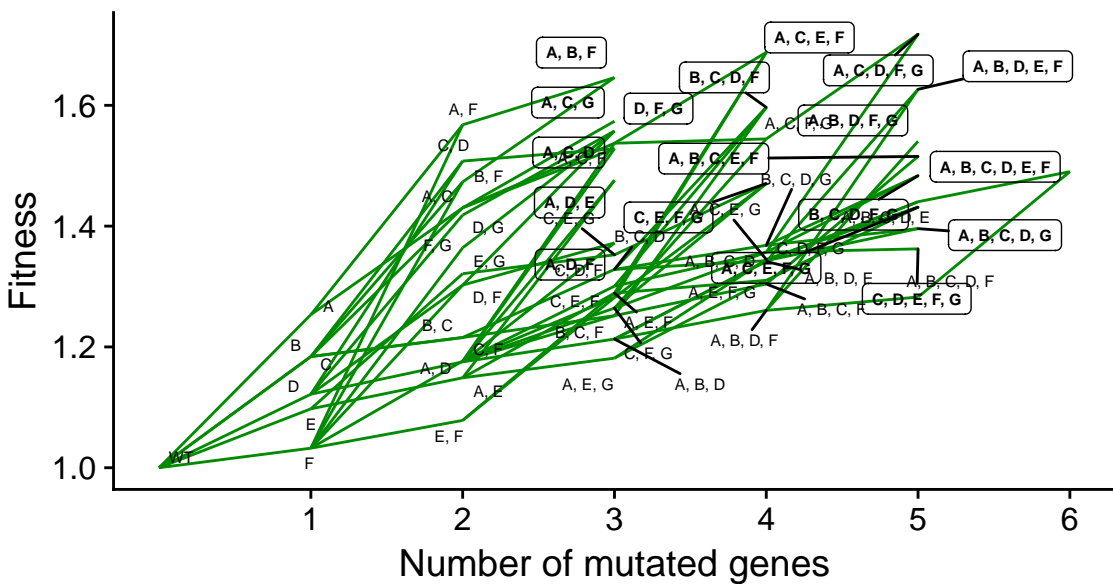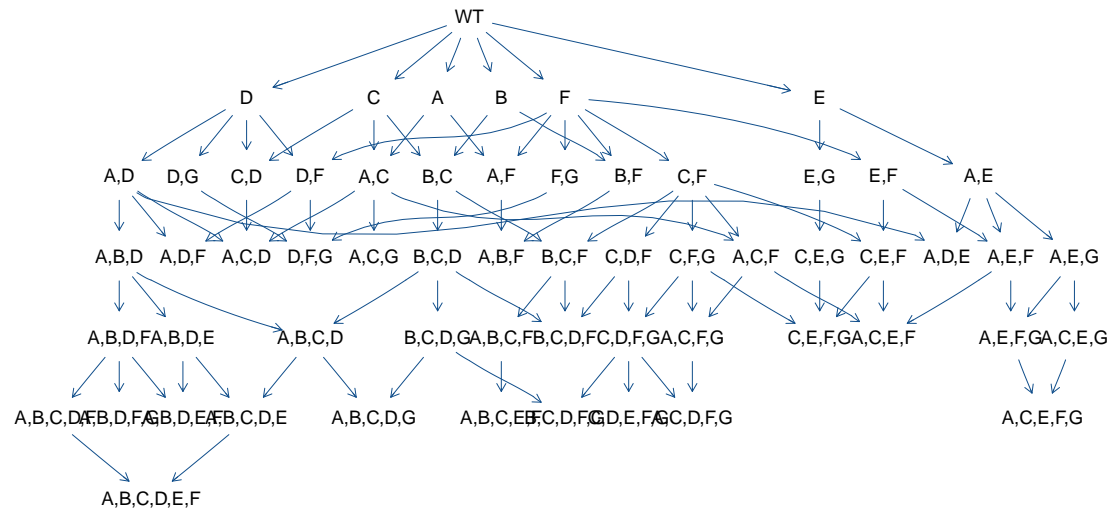



ID ZjLMUPFuopk2WZUI  
 acc genotypes 22  
 peaks no back 7  
 removed edges NA  
 prop rem edges NA

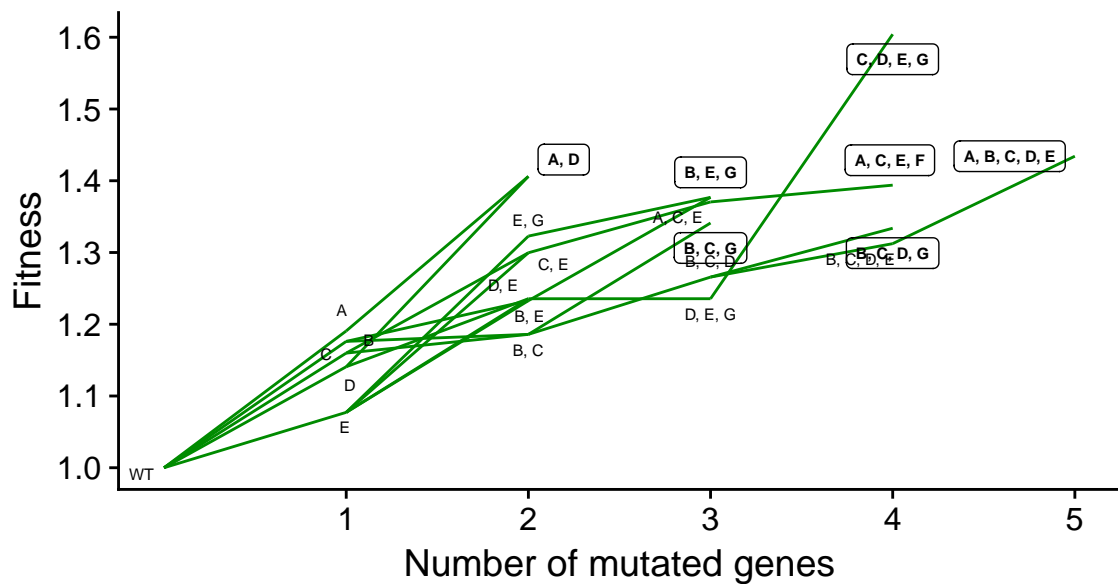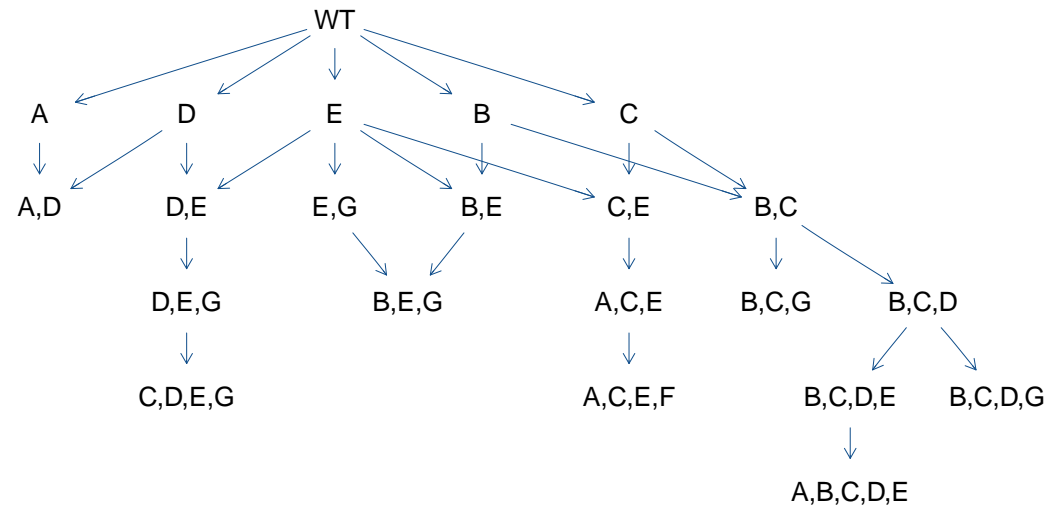

ID ZVWECQo9V7rYLRNy  
 acc genotypes 72  
 peaks no back 10  
 removed edges NA  
 prop rem edges NA

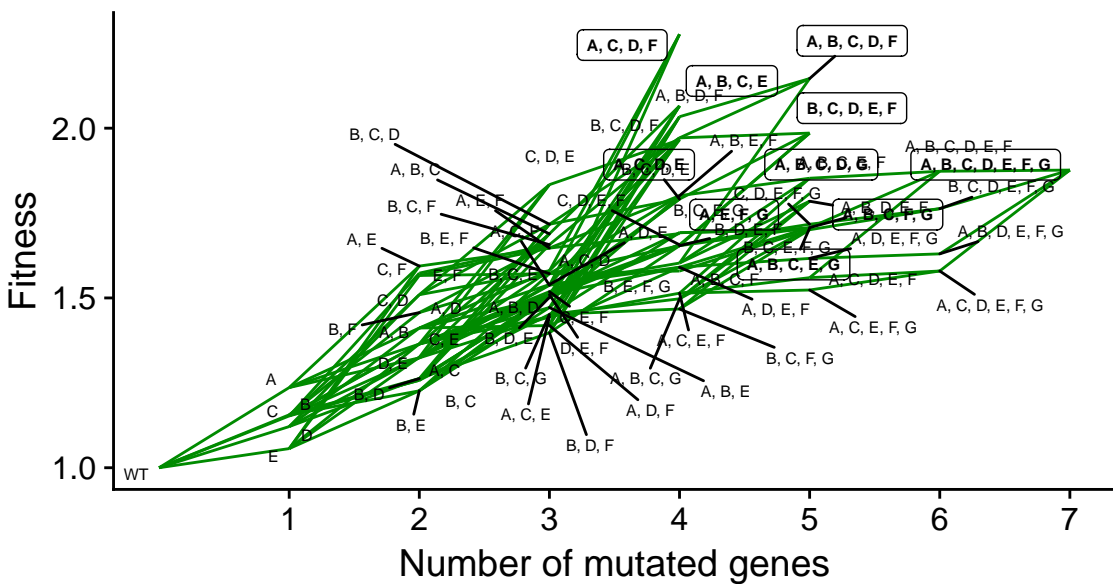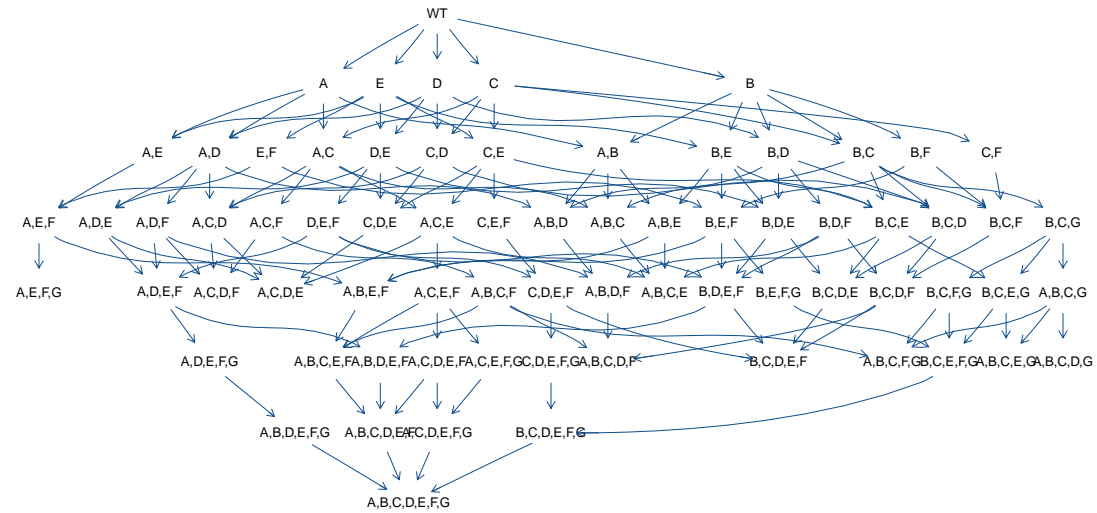

ID ZWDP3y7TKpRZUzKJ  
 acc genotypes 46  
 peaks no back 15  
 removed edges NA  
 prop rem edges NA

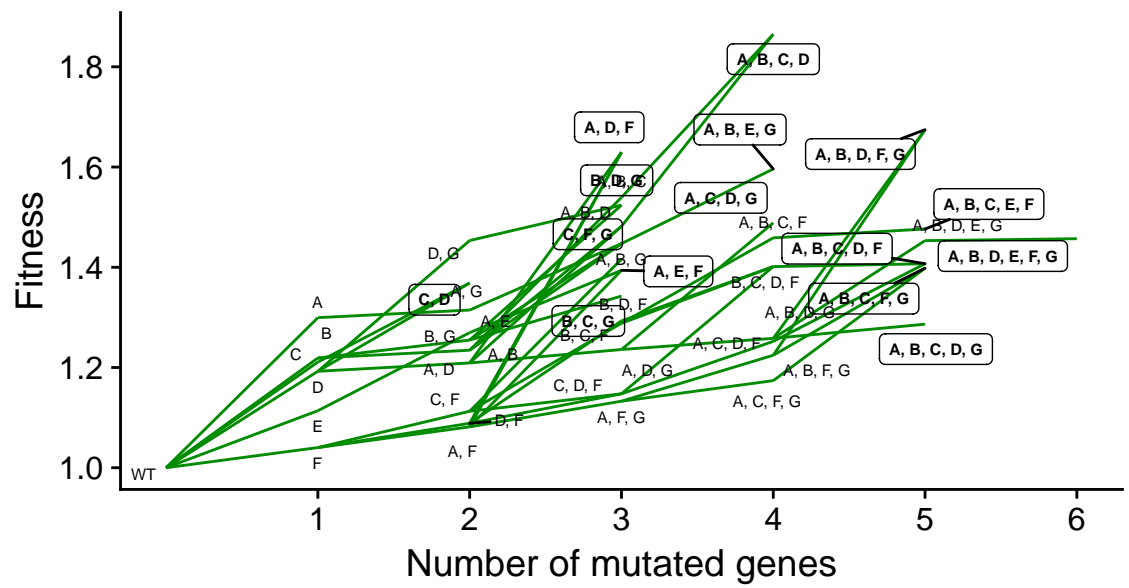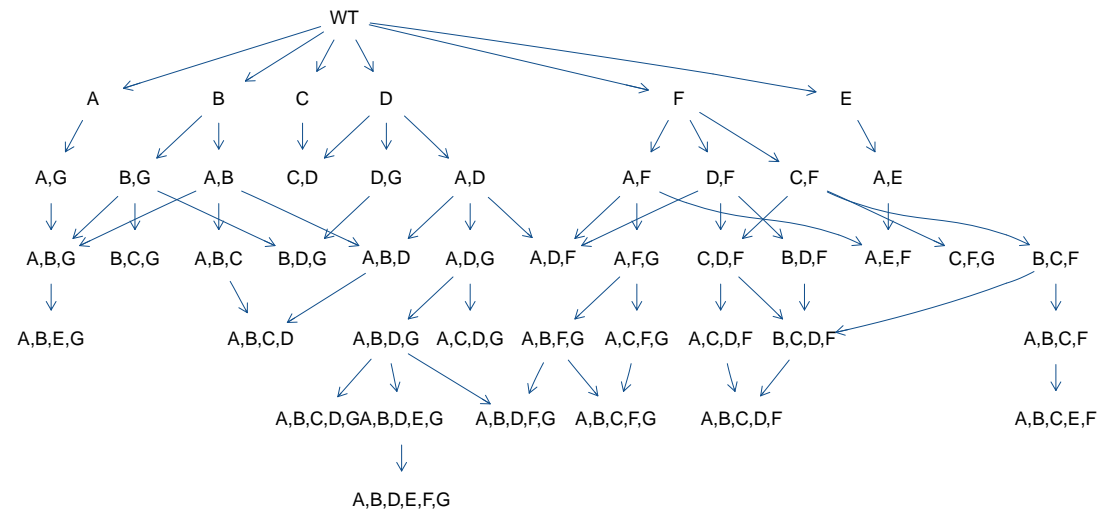

ID ZXShHtwLyLLxewaU  
 acc genotypes 51  
 peaks no back 22  
 removed edges NA  
 prop rem edges NA

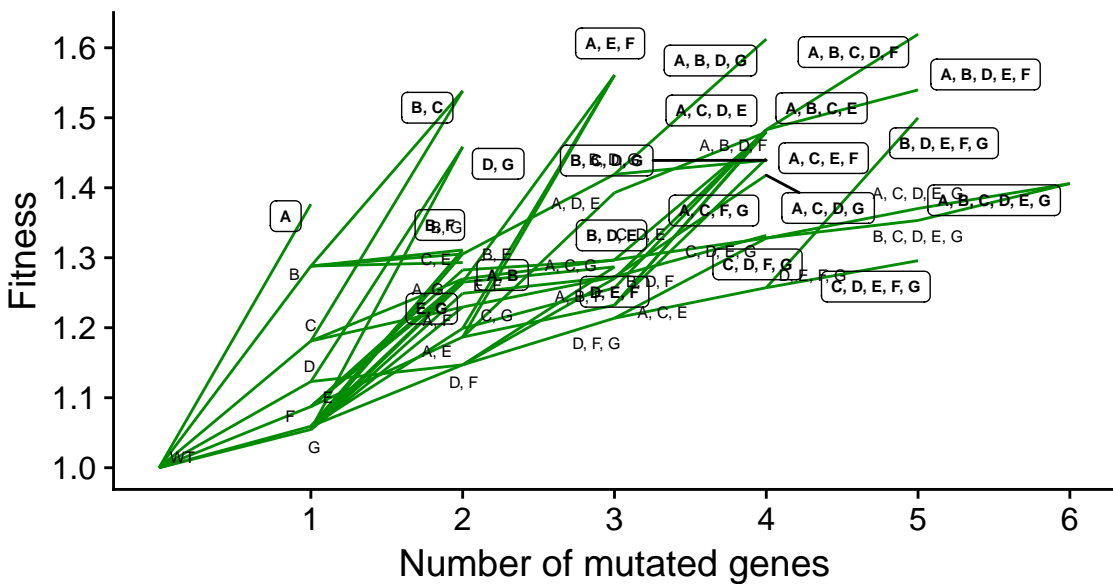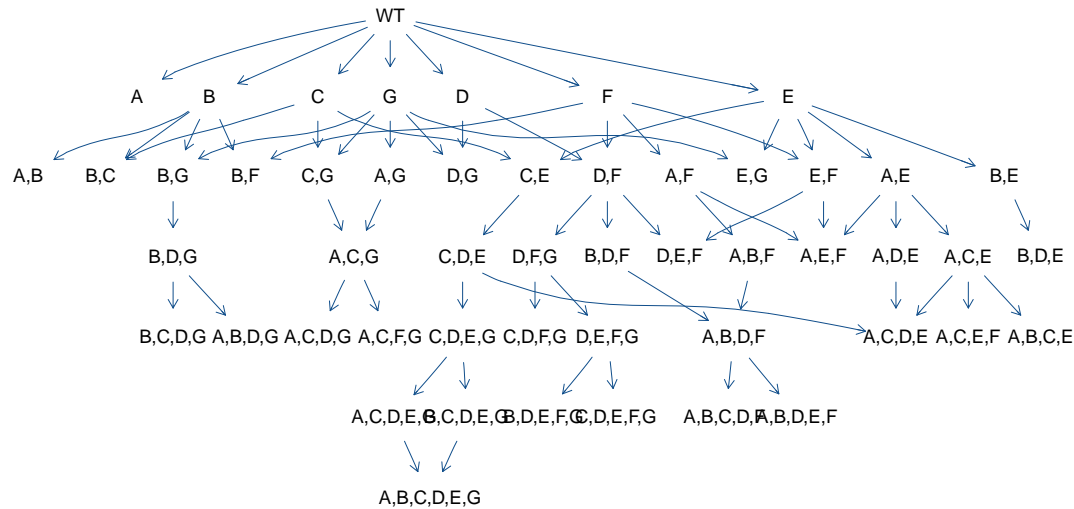

Supplement: Supplementary file [file 371039-2.pdf]
