# Supplementary material for: Every which way? On predicting tumor evolution using cancer progression models
Source: bioRxiv or medRxiv preprint supplement (doi:10.1101/371039), 2019-04-18

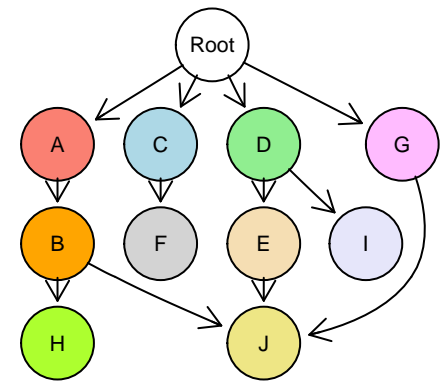

ID 10lc5x6106RnZOmZ6Z  
 acc genotypes 132  
 peaks no back 1  
 removed edges 0  
 prop rem edges 0

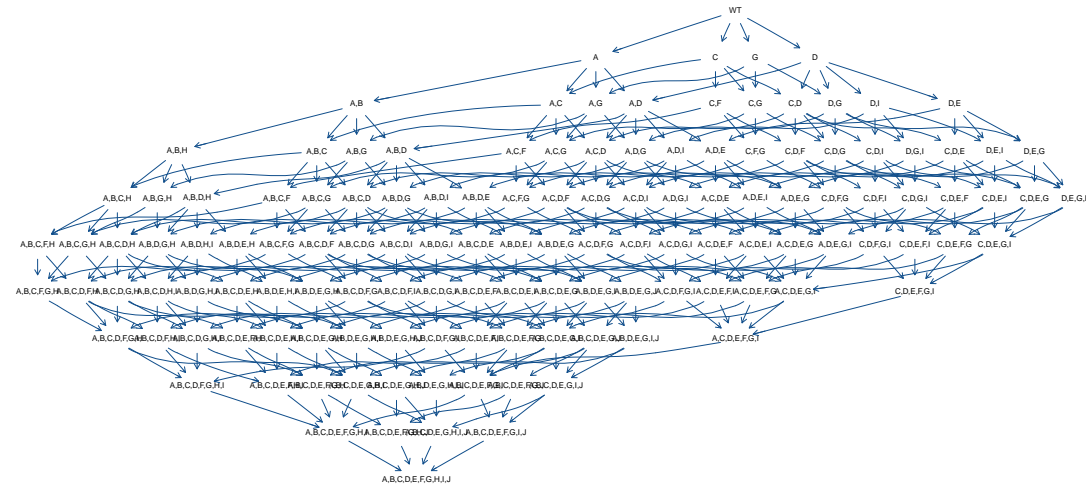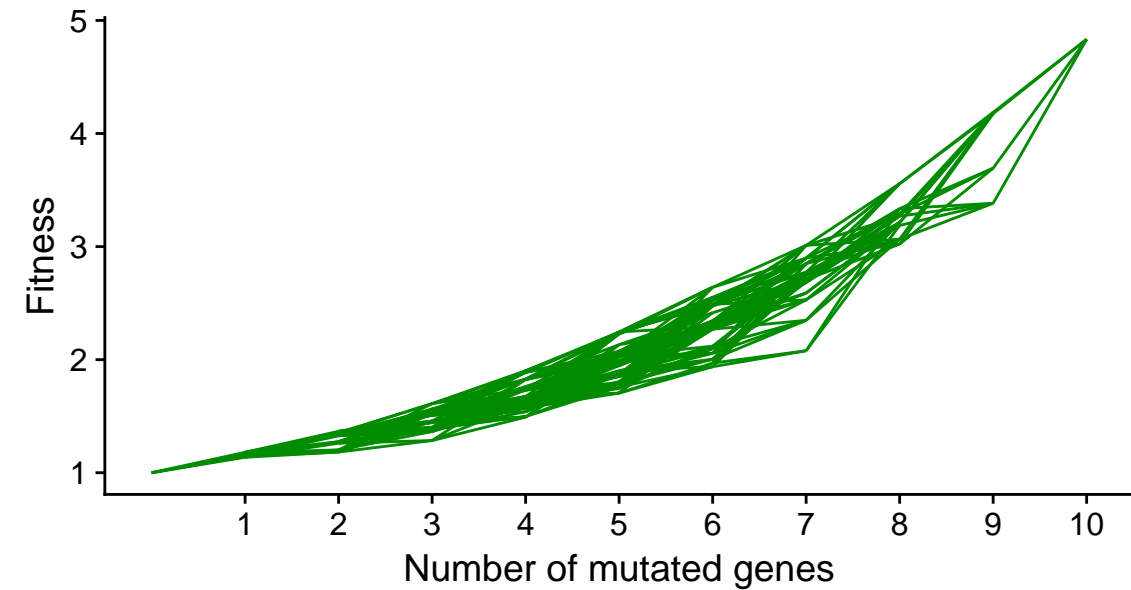

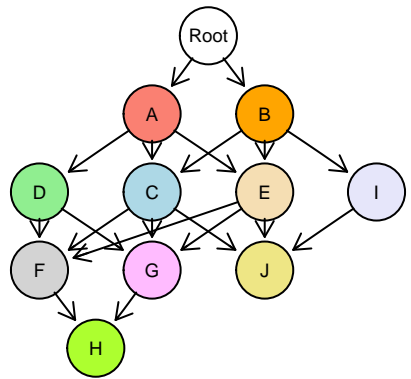

ID 10sA3fCTx7METho38  
 acc genotypes 35  
 peaks no back 1  
 removed edges 0  
 prop rem edges 0

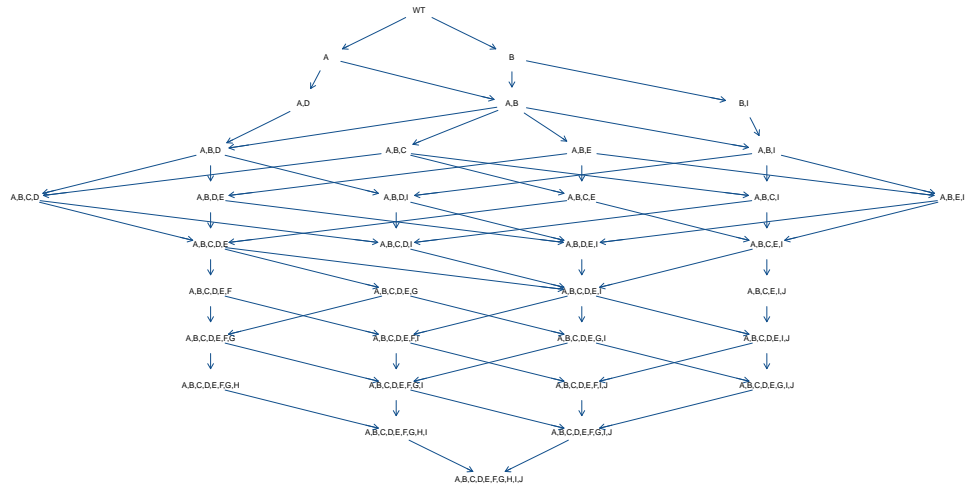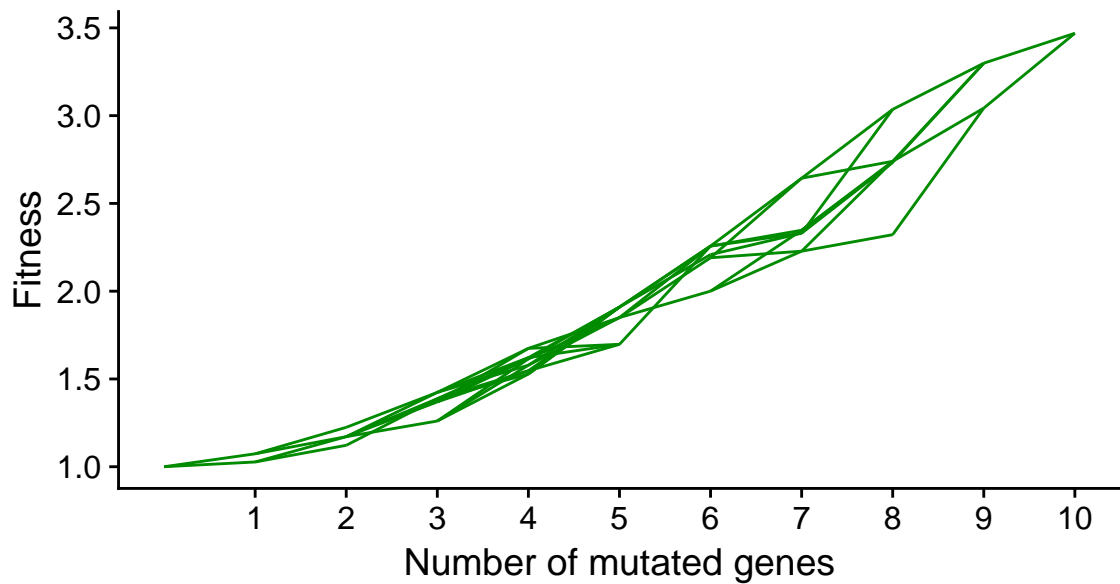

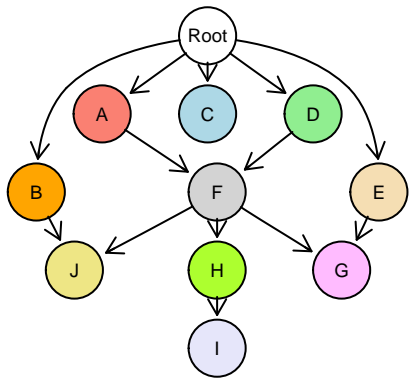

ID 1MaScdYnWRHseOZ7  
 acc genotypes 86  
 peaks no back 1  
 removed edges 0  
 prop rem edges 0

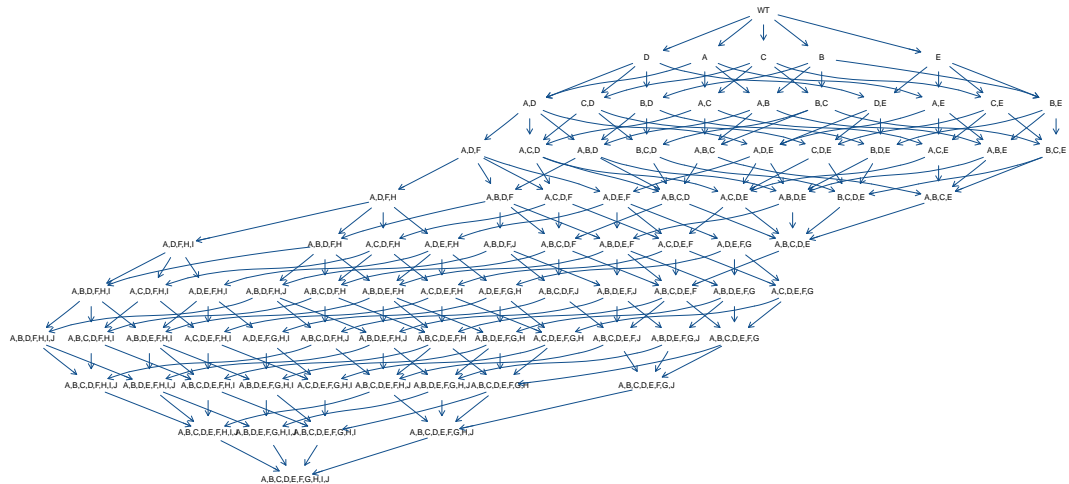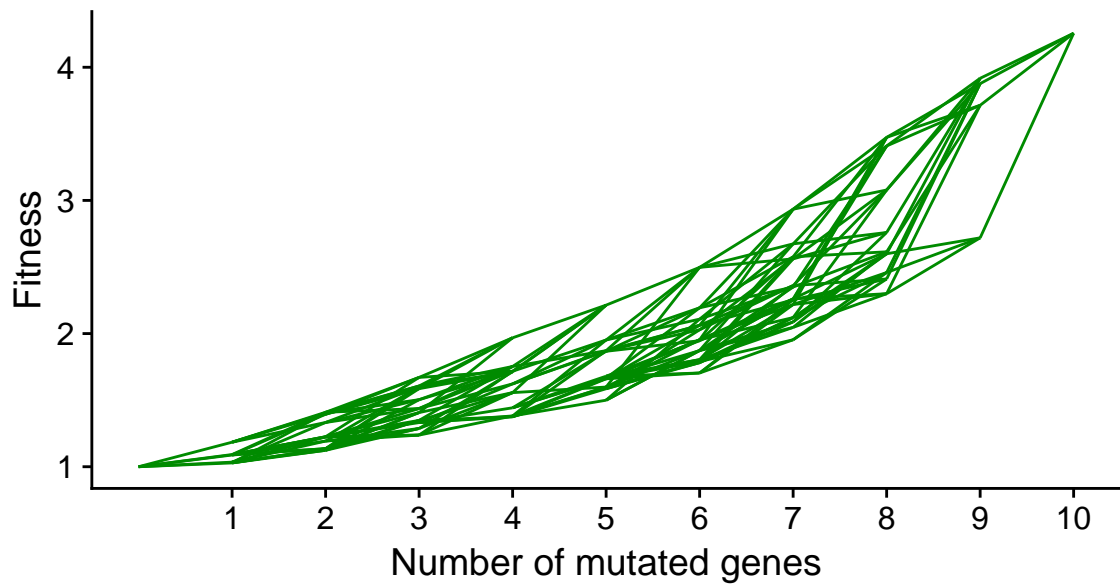

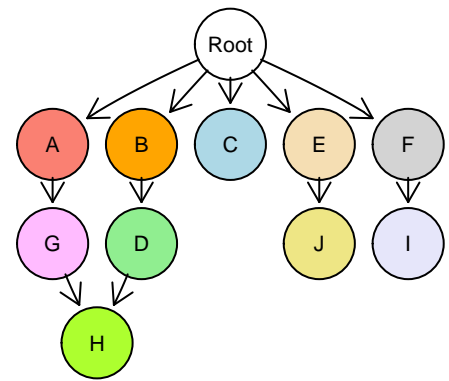

*ID* 1NI1Lblu3EuEdbw8  
*acc genotypes* 180  
*peaks no back* 1  
*removed edges* 0  
*prop rem edges* 0

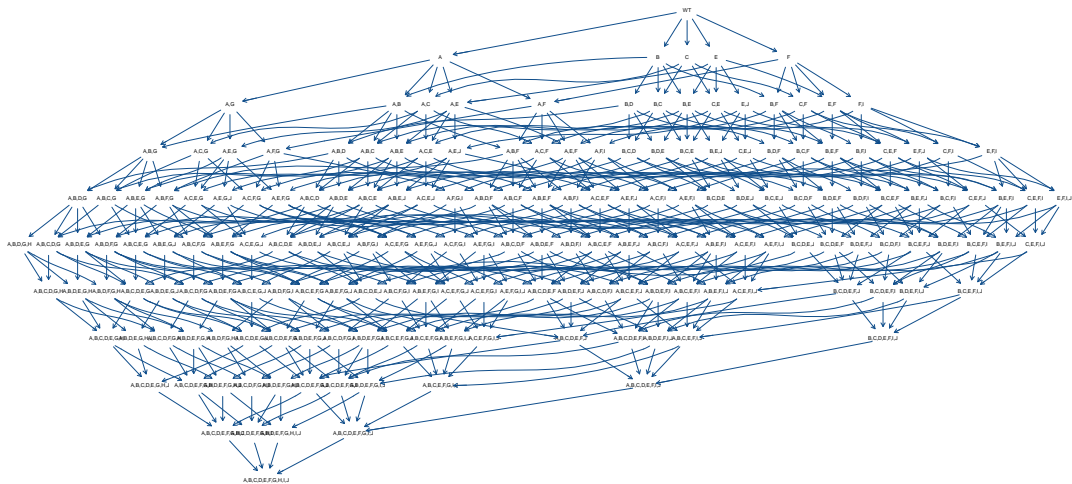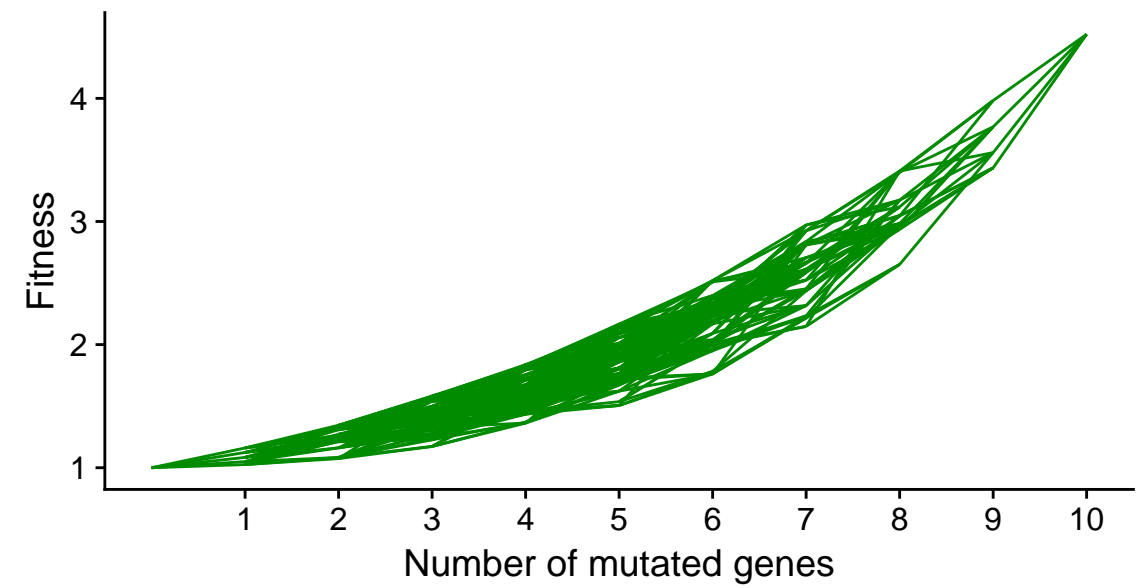

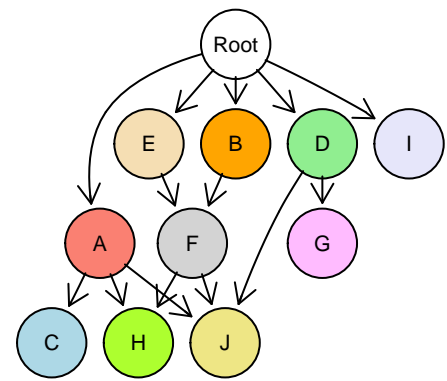

*ID* 2PhVbwXtsibgHoCR  
*acc genotypes* 118  
*peaks no back* 1  
*removed edges* 0  
*prop rem edges* 0

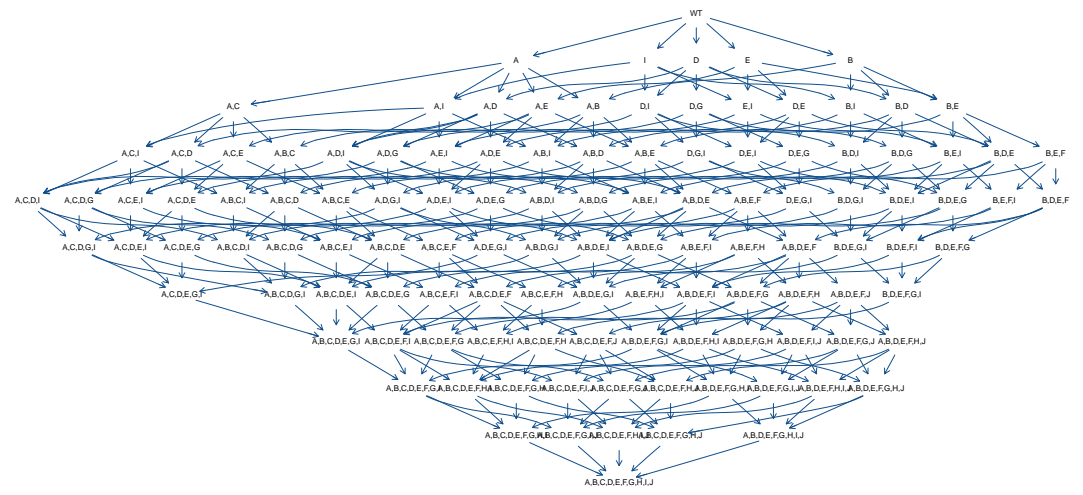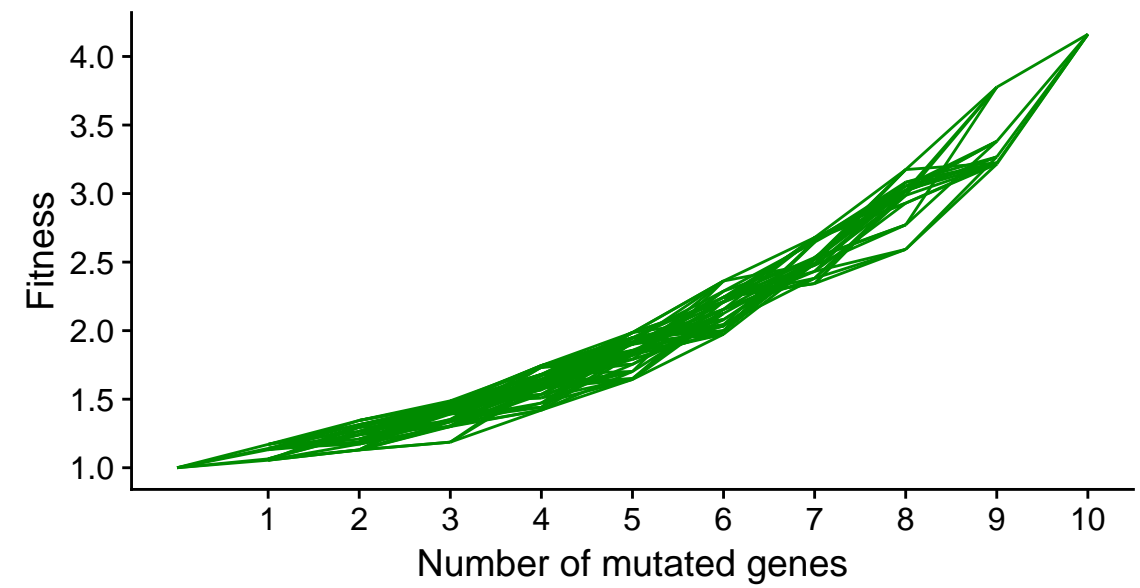

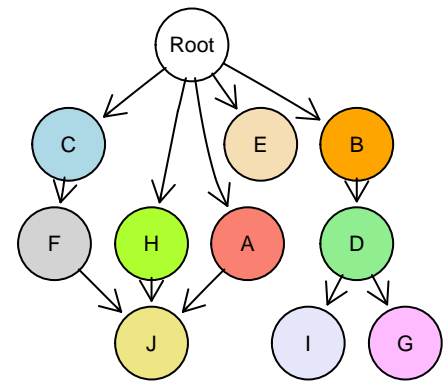

*ID* 2QFqp77NSVxKUuRw  
*acc genotypes* 156  
*peaks no back* 1  
*removed edges* 0  
*prop rem edges* 0

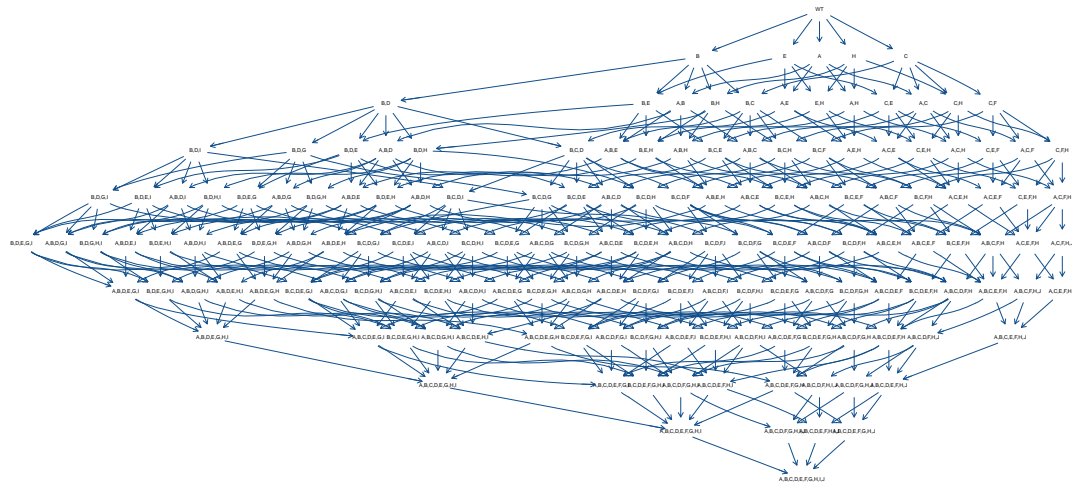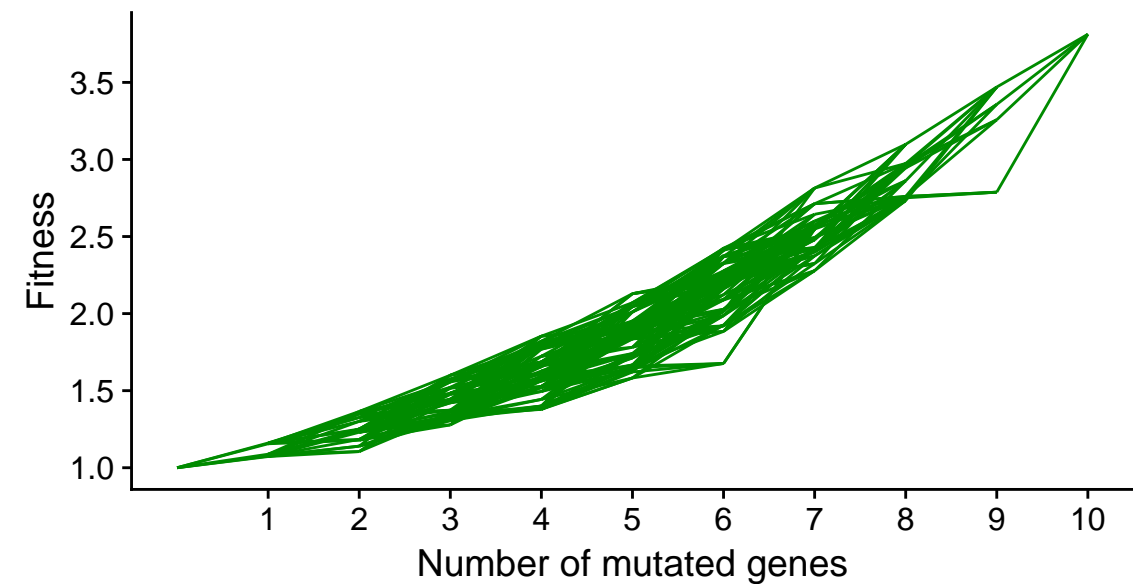

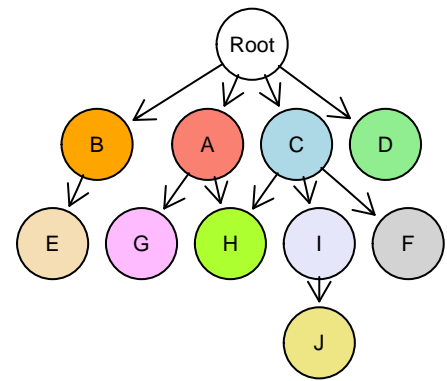

*ID* 3LaNuAy8eWU4GMwm  
*acc genotypes* 198  
*peaks no back* 1  
*removed edges* 0  
*prop rem edges* 0

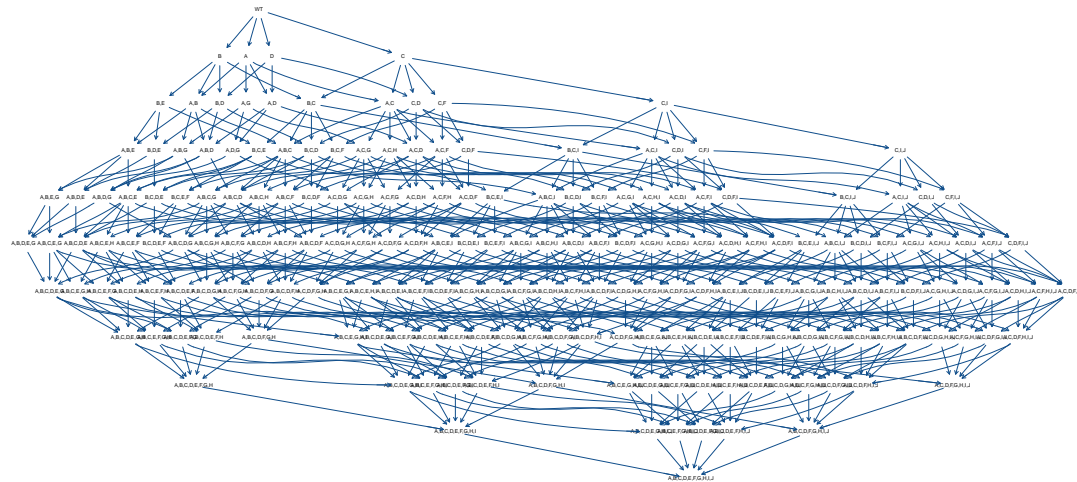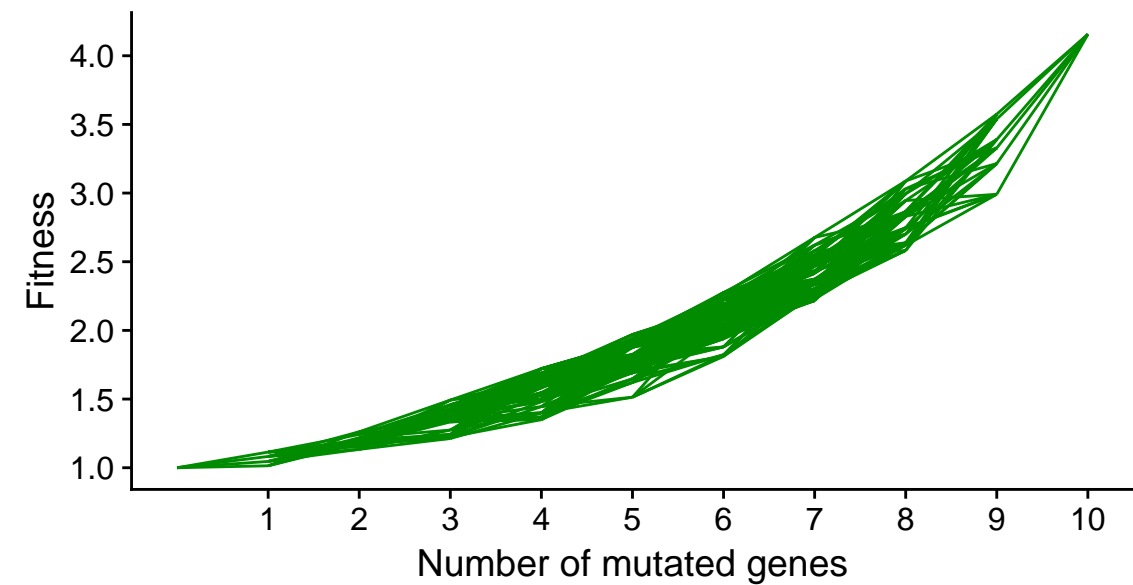

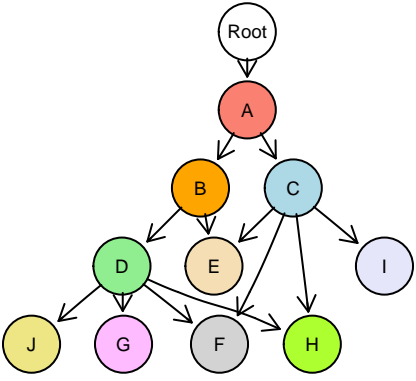

*ID* 3qwCINpvS1TW6yT3  
*acc genotypes* 77  
*peaks no back* 1  
*removed edges* 0  
*prop rem edges* 0

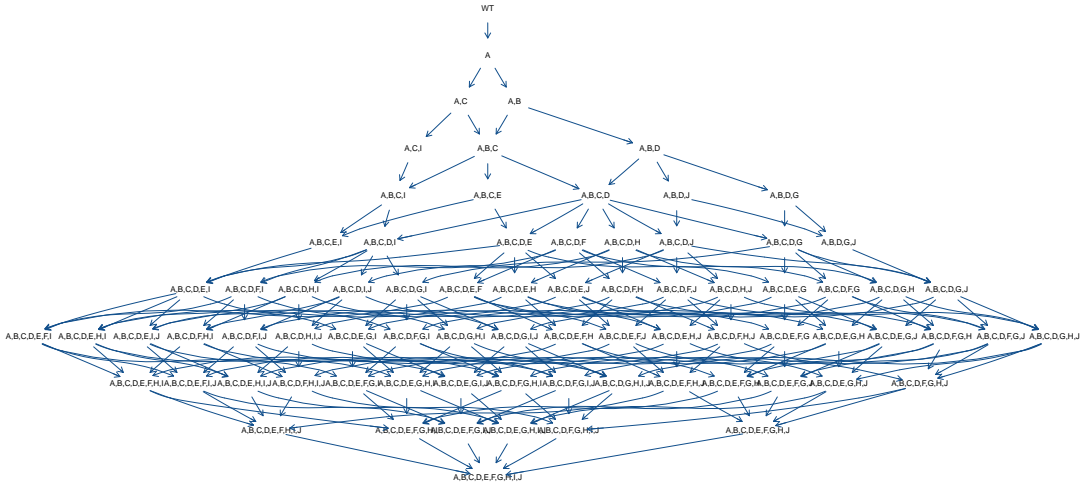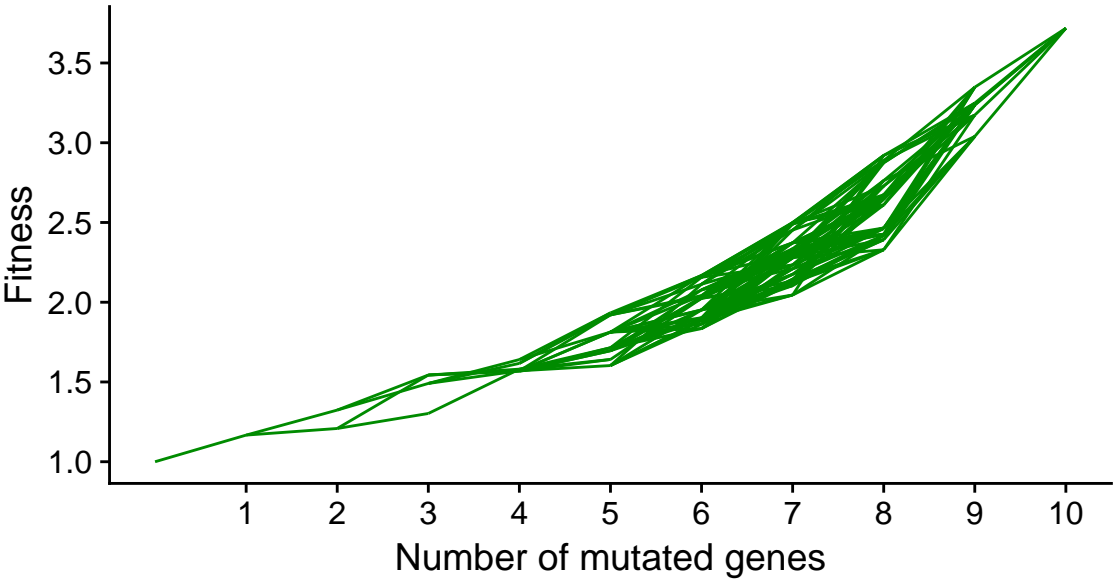



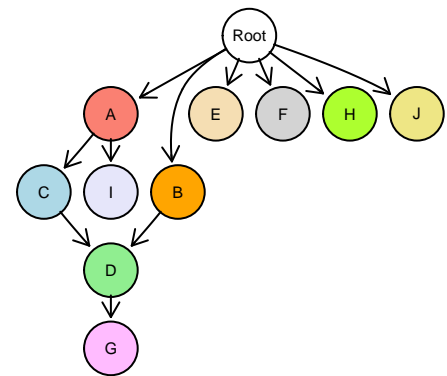

*ID* 3wRHh10MSegWf4SVc  
*acc genotypes* 224  
*peaks no back* 1  
*removed edges* 0  
*prop rem edges* 0

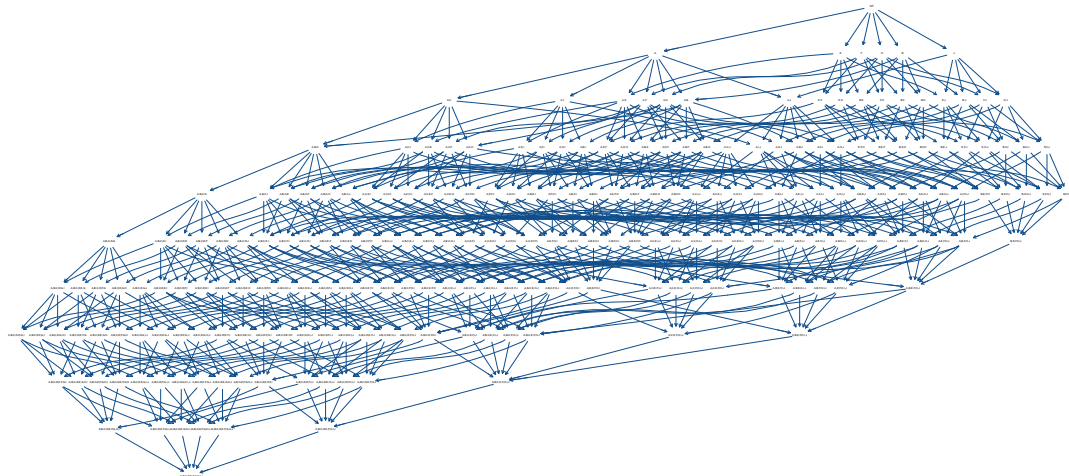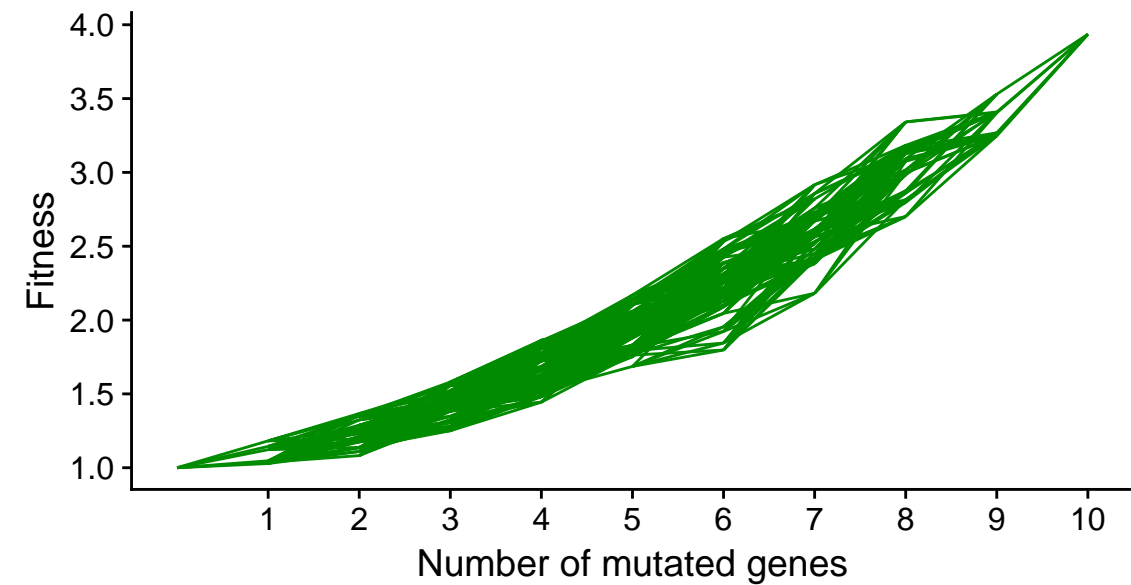

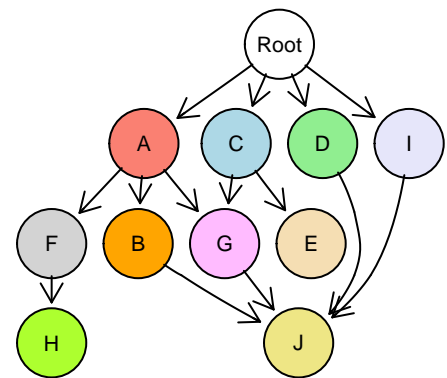

*ID* 3xUzonJpTvNpS9cY  
*acc genotypes* 138  
*peaks no back* 1  
*removed edges* 0  
*prop rem edges* 0

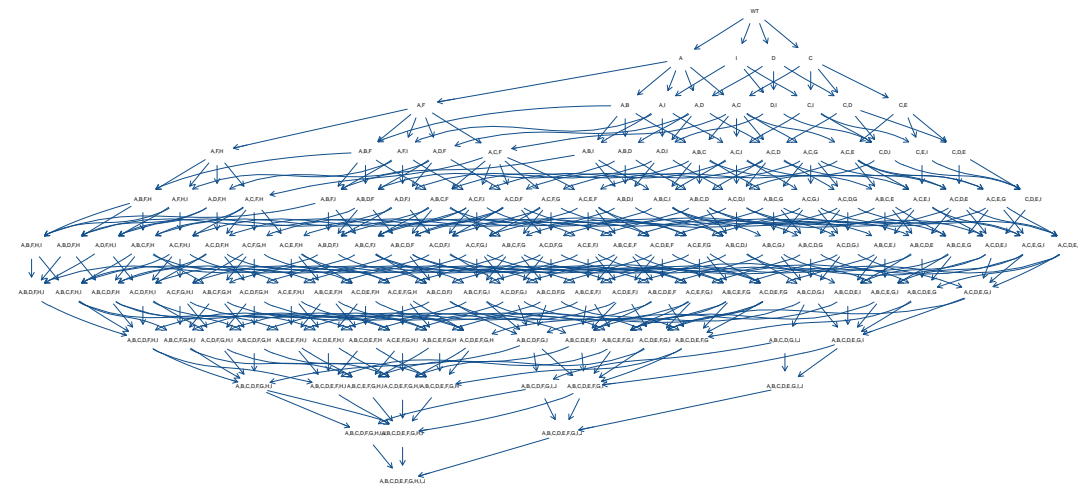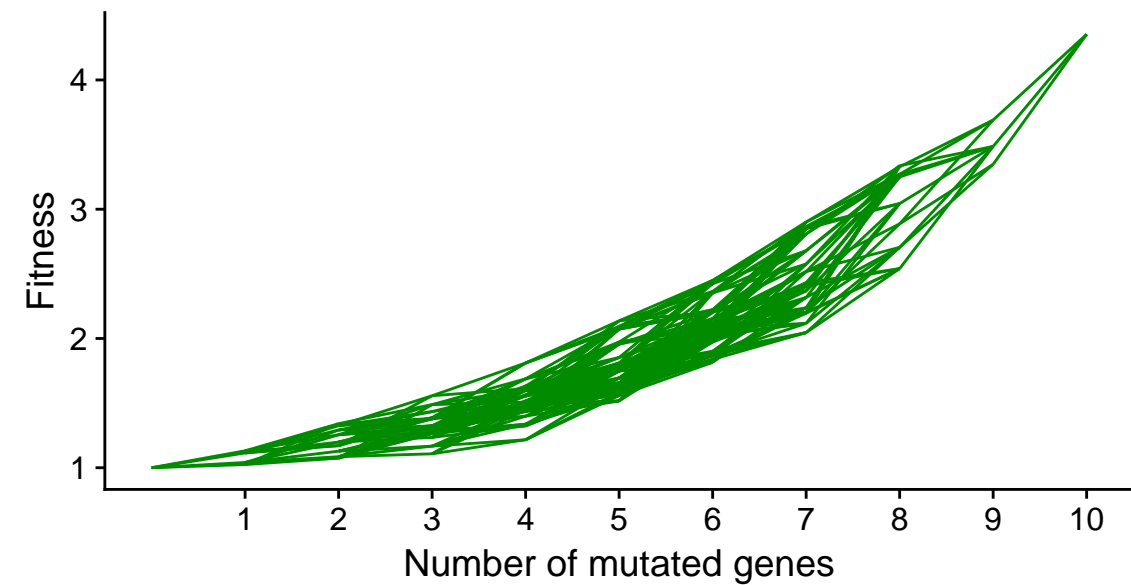

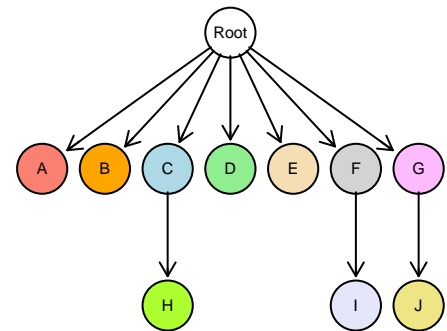

ID 41wj4xc10qjq6tByv  
 acc genotypes 432  
 peaks no back 1  
 removed edges 0  
 prop rem edges 0

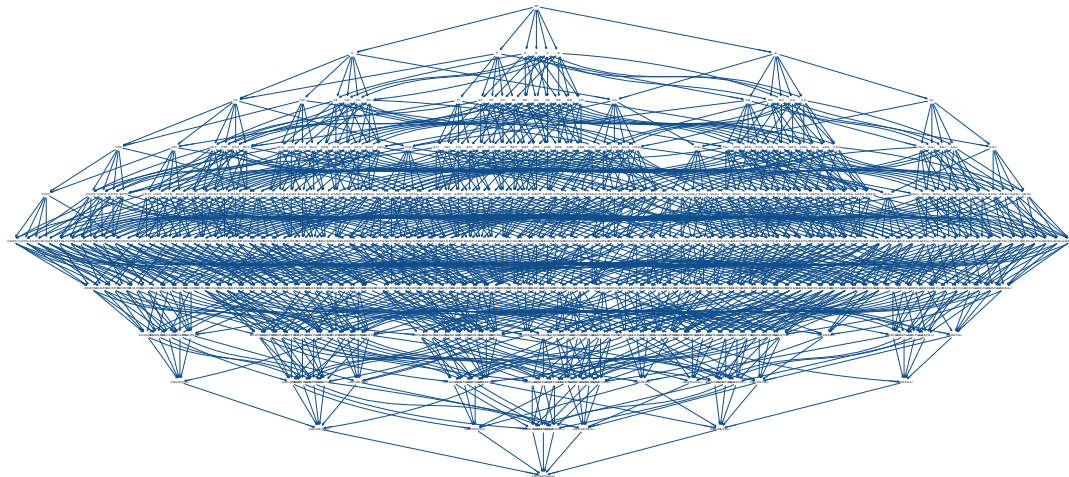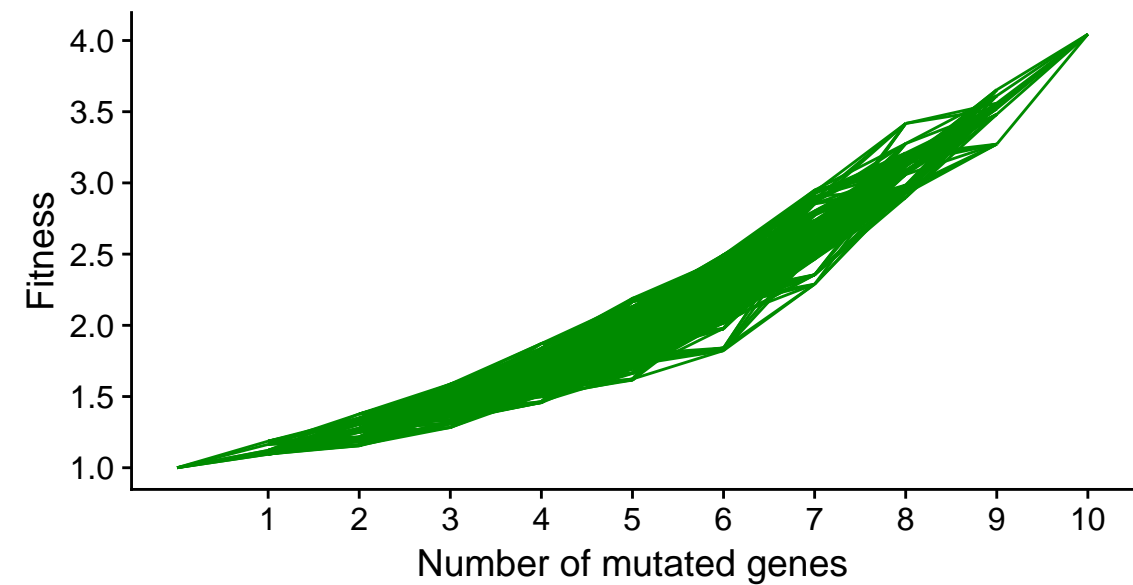

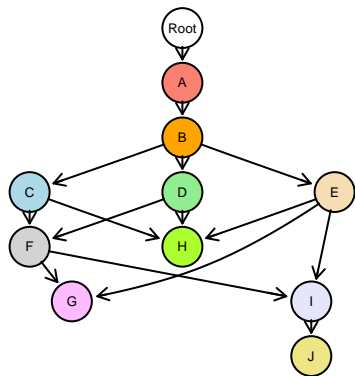

ID 43e2wOk4101CSHhe7  
 acc genotypes 24  
 peaks no back 1  
 removed edges 0  
 prop rem edges 0

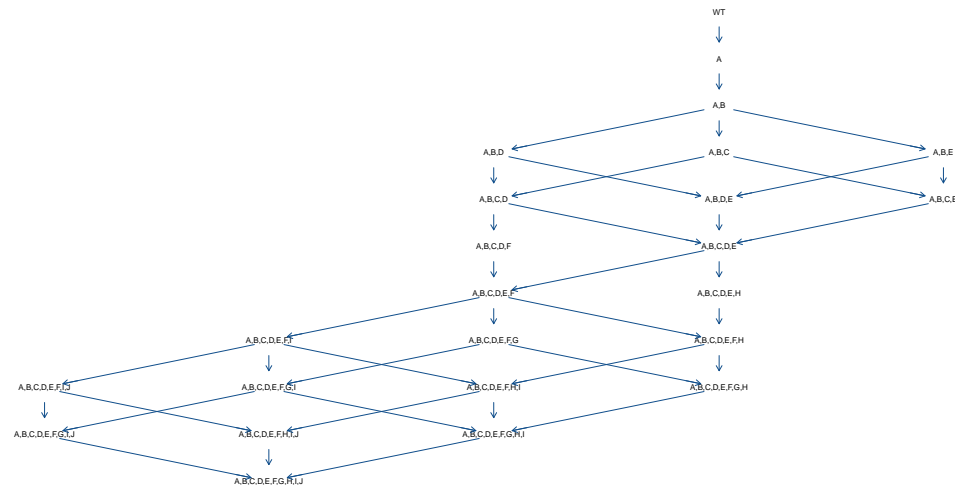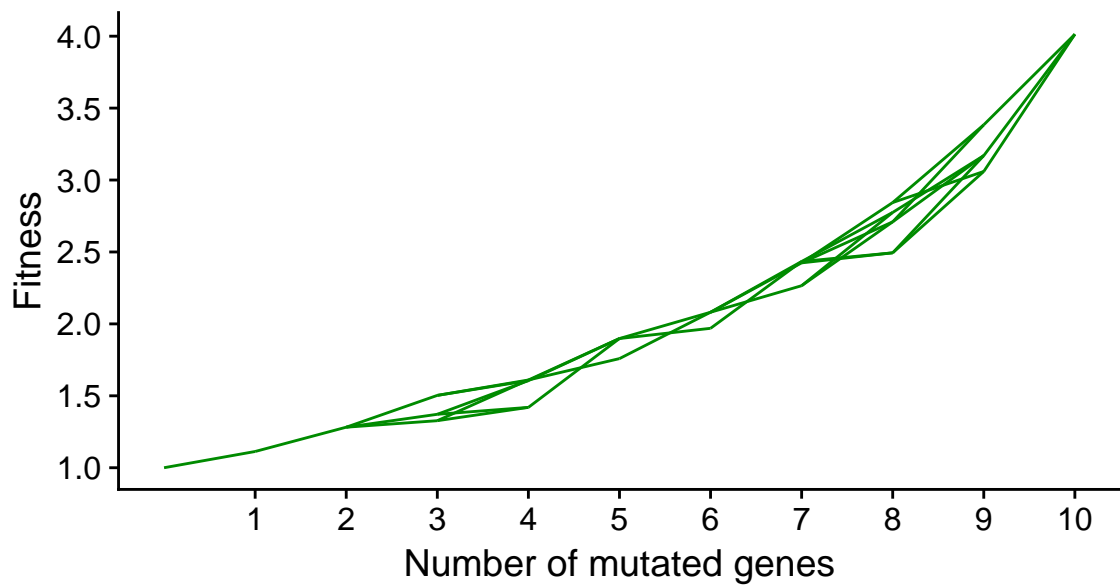

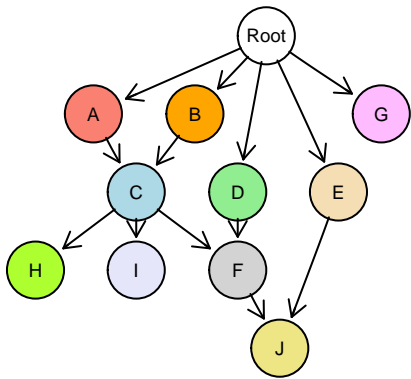

ID 45ZtV5kGH2lwAPAq  
 acc genotypes 88  
 peaks no back 1  
 removed edges 0  
 prop rem edges 0

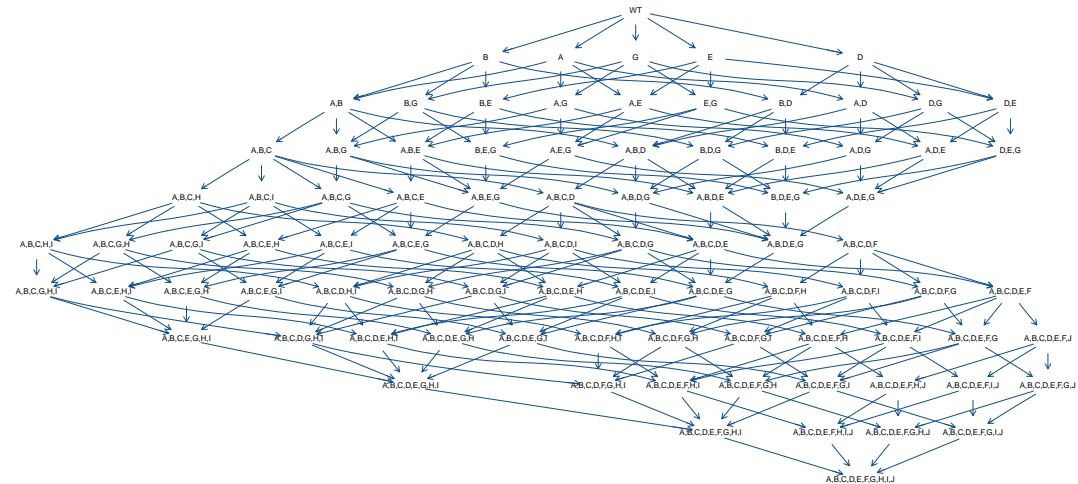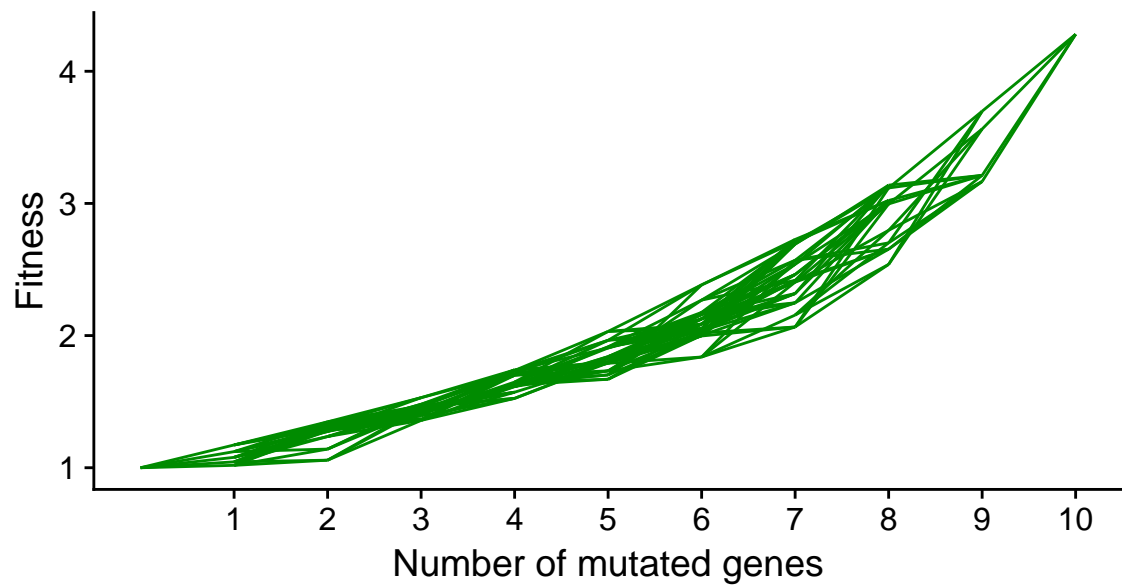

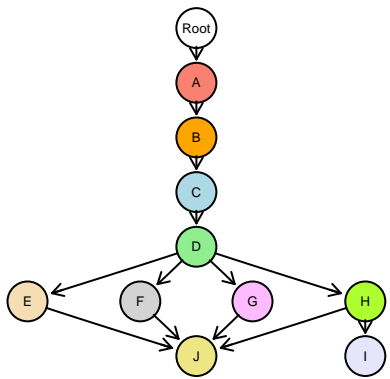

ID 510skollHNus2jjBB  
 acc genotypes 30  
 peaks no back 1  
 removed edges 0  
 prop rem edges 0

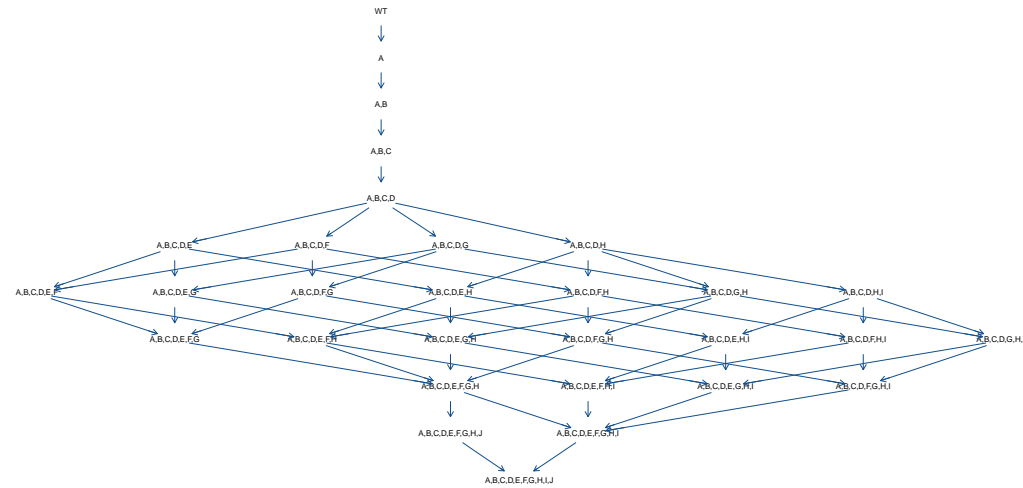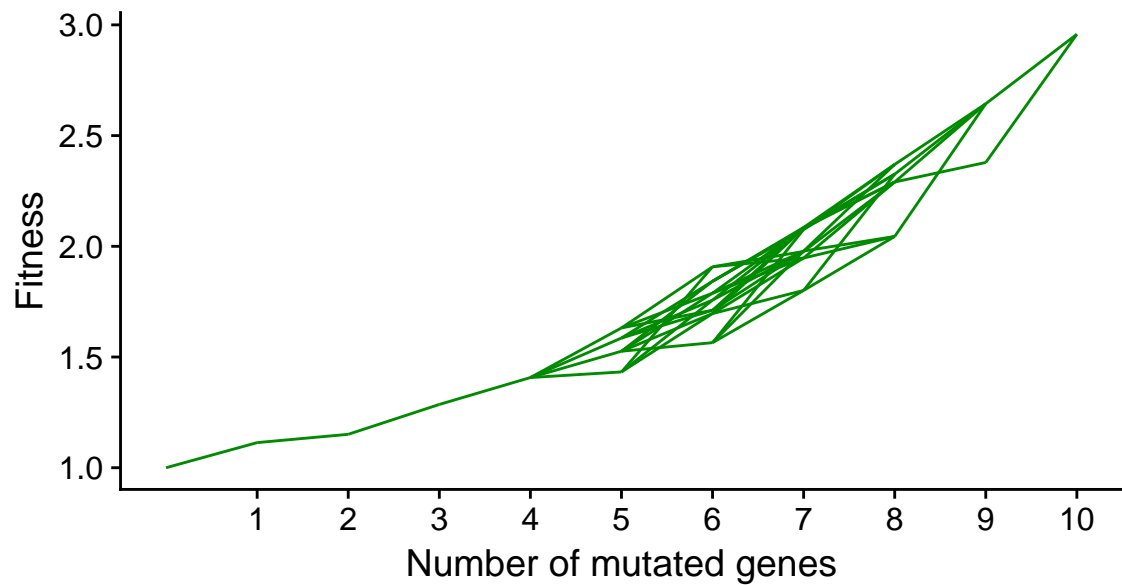

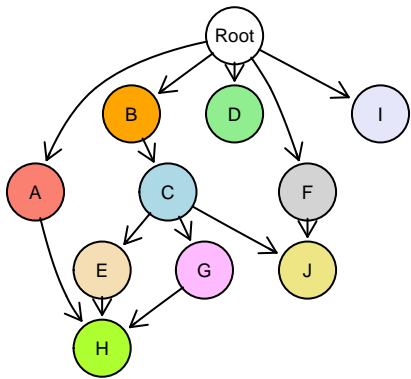

*ID* 56QJuQAd106HujMS5  
*acc genotypes* 140  
*peaks no back* 1  
*removed edges* 0  
*prop rem edges* 0

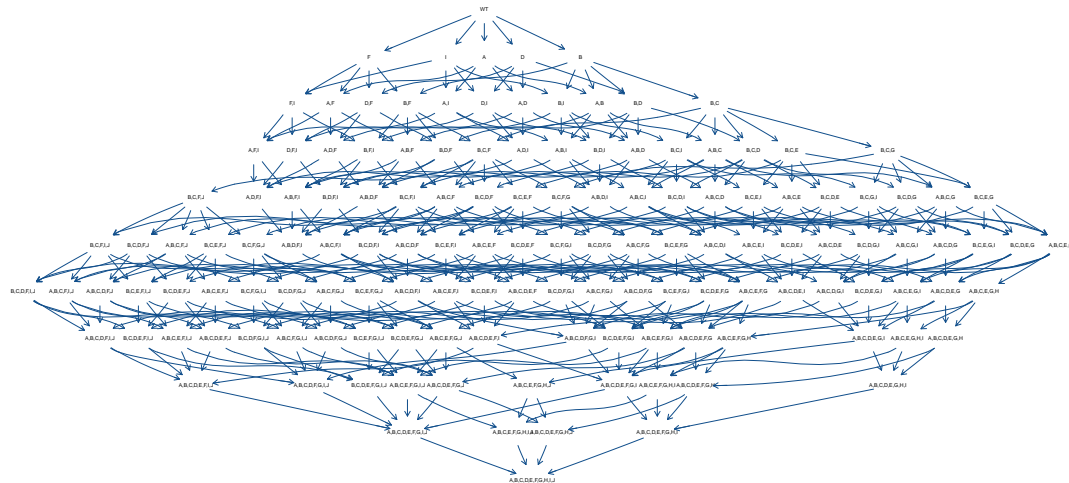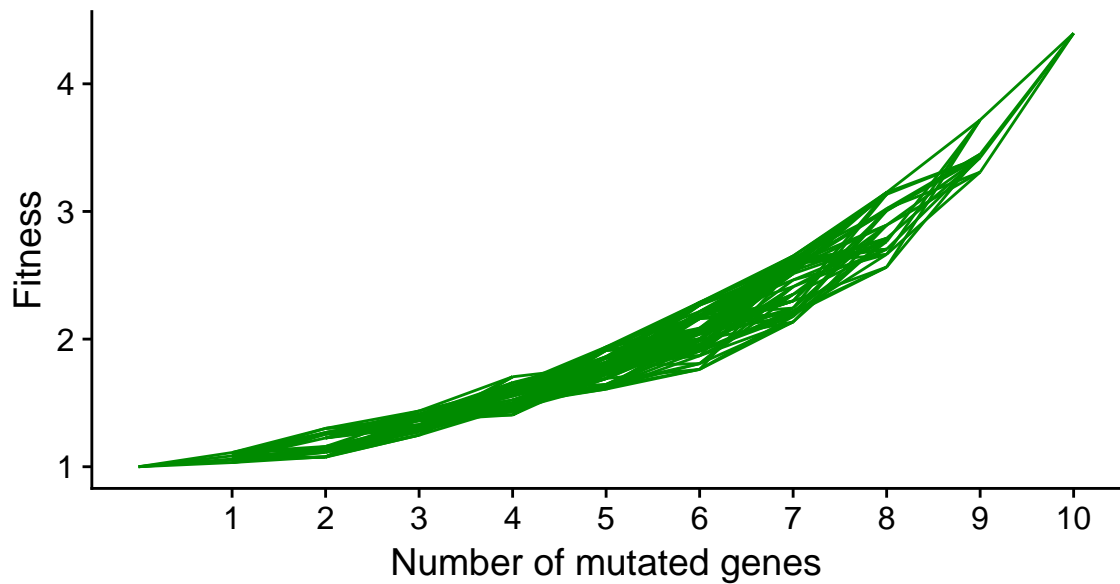

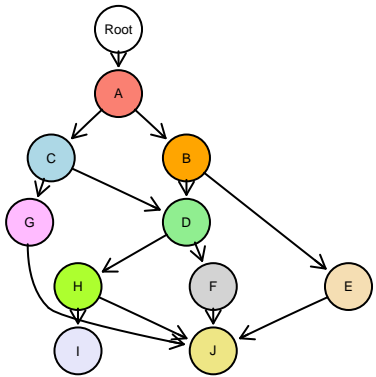

*ID* 59d4W3MnYvIGNDg  
*acc genotypes* 36  
*peaks no back* 1  
*removed edges* 0  
*prop rem edges* 0

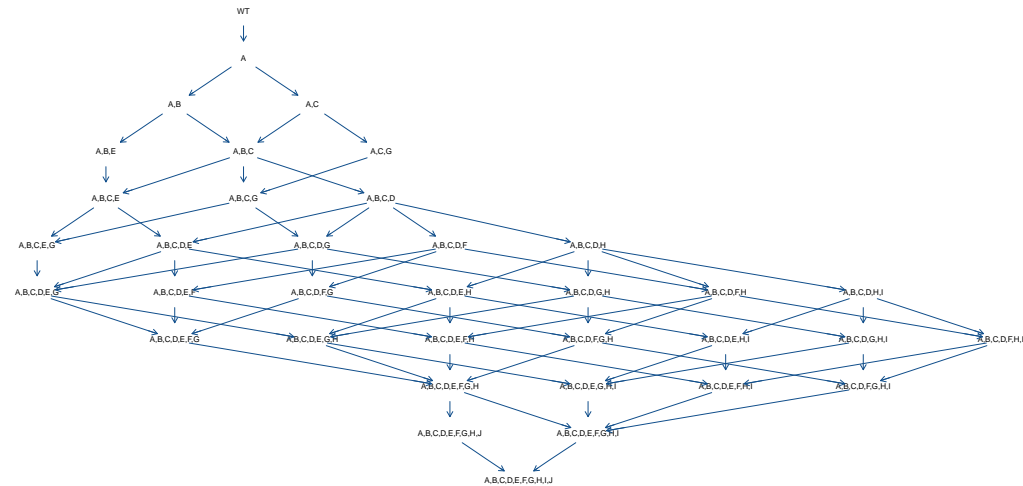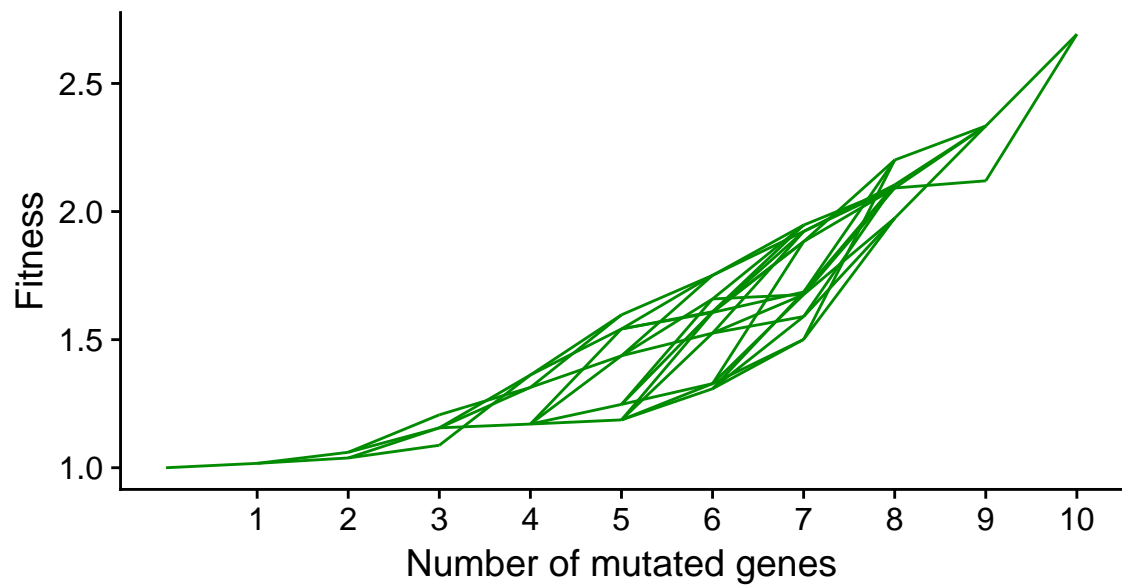



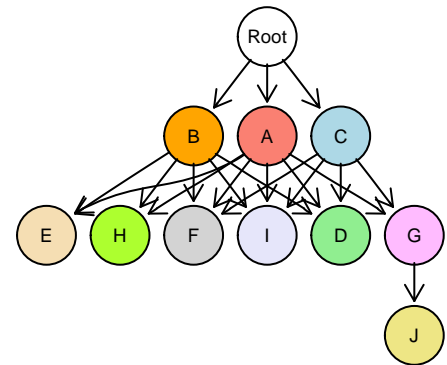

*ID* 5aGJFJcQGLZfPKJM  
*acc genotypes* 108  
*peaks no back* 1  
*removed edges* 0  
*prop rem edges* 0

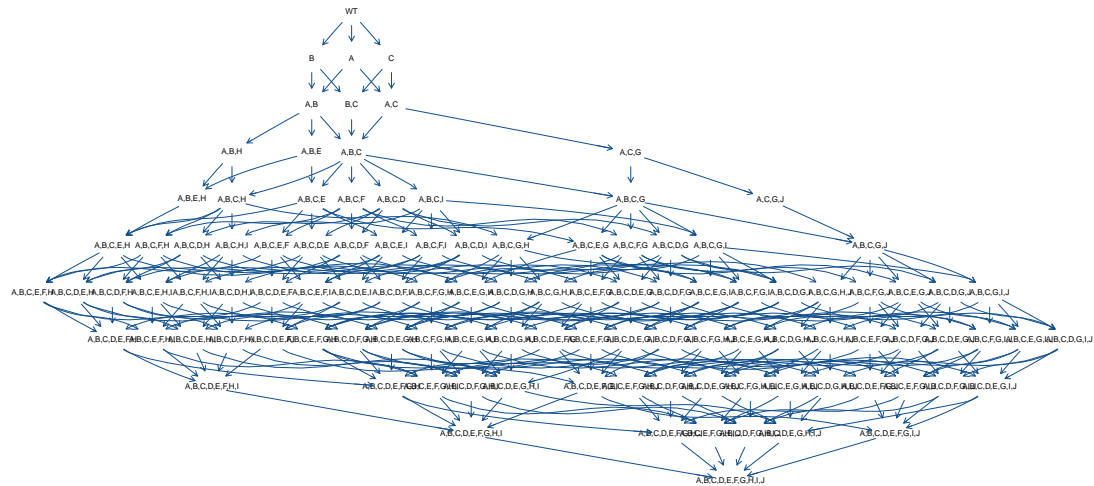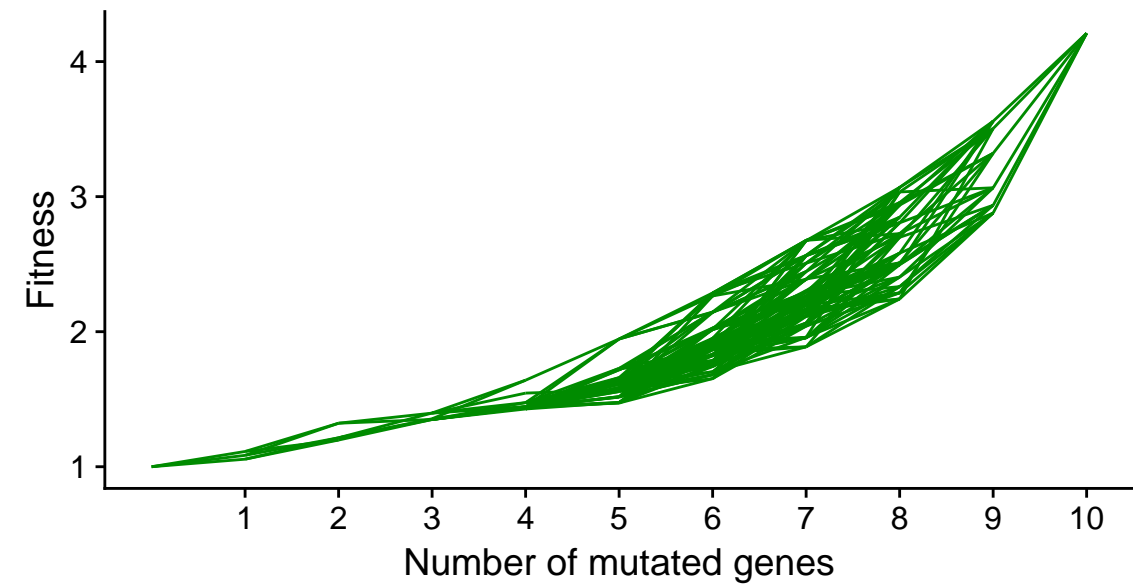

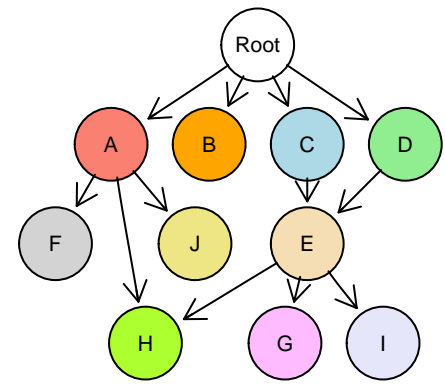

*ID* 5ism4PKhL1Vt6vub  
*acc genotypes* 112  
*peaks no back* 1  
*removed edges* 0  
*prop rem edges* 0

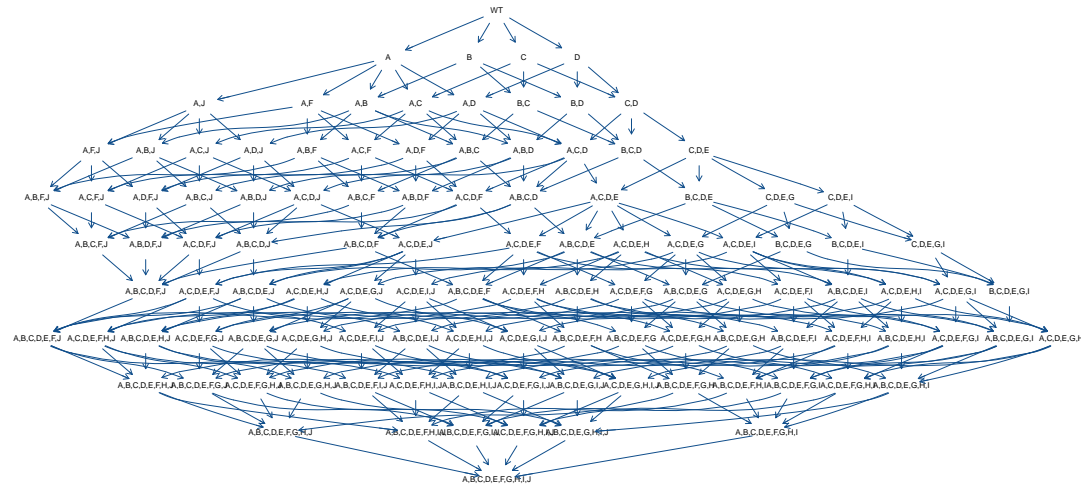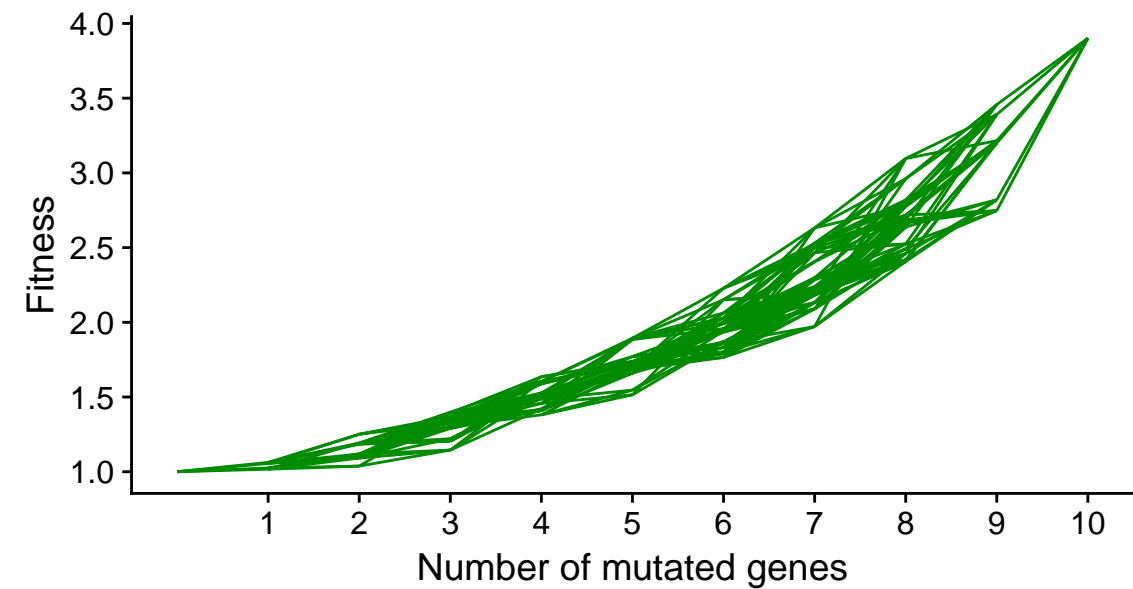

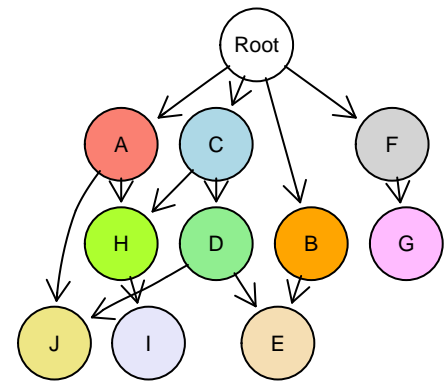

ID **5j8b10ekasUqQVF9H**  
 acc genotypes **99**  
 peaks no back **1**  
 removed edges **0**  
 prop rem edges **0**

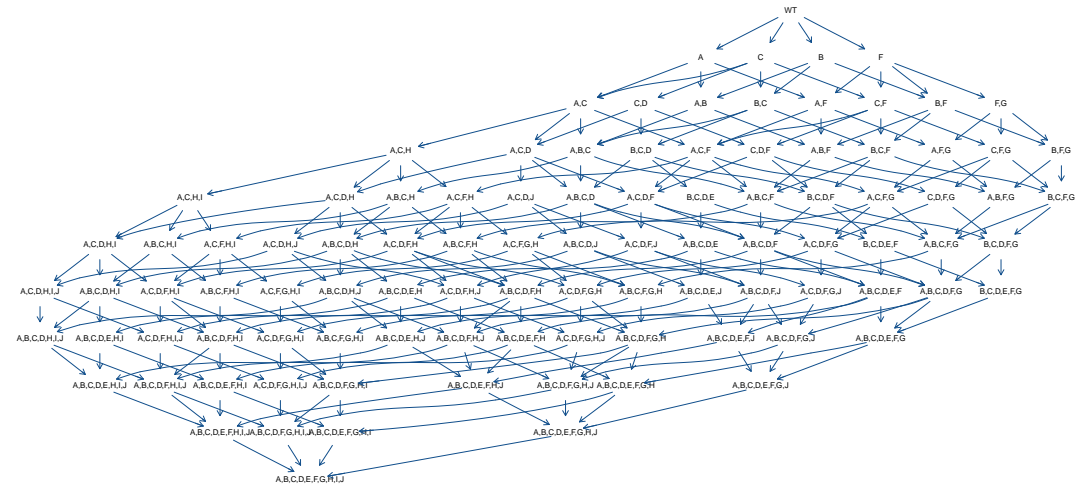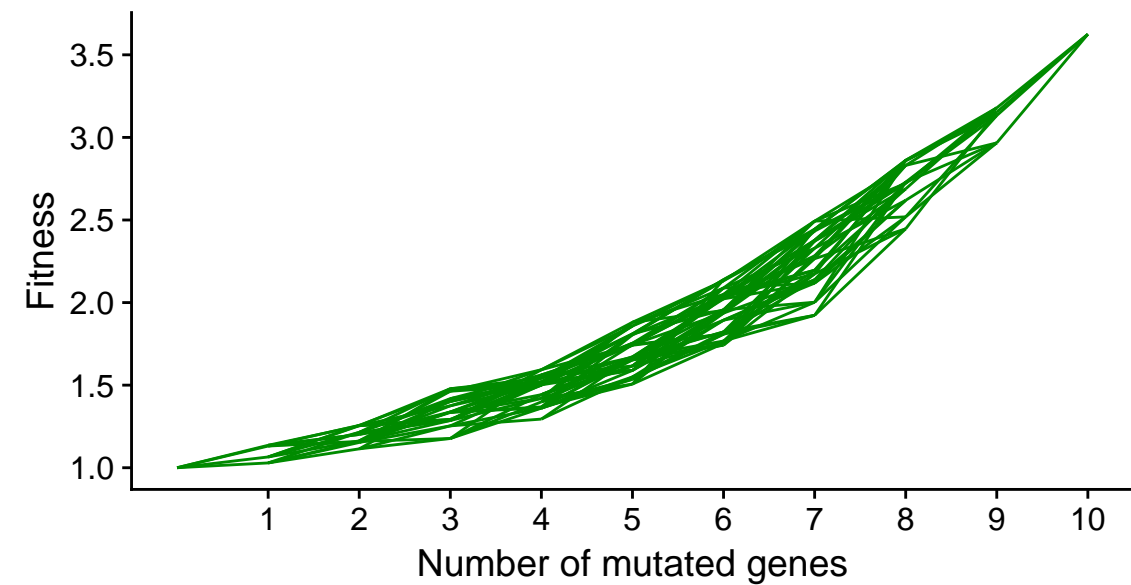

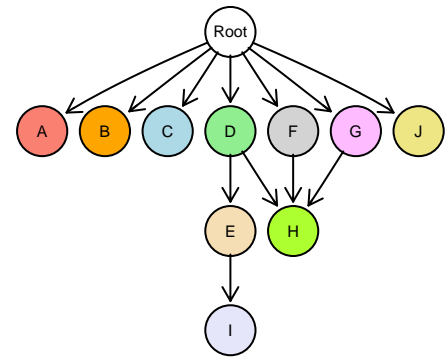

*ID* 5RbSm92BvC5zV10ss  
*acc genotypes* 304  
*peaks no back* 1  
*removed edges* 0  
*prop rem edges* 0

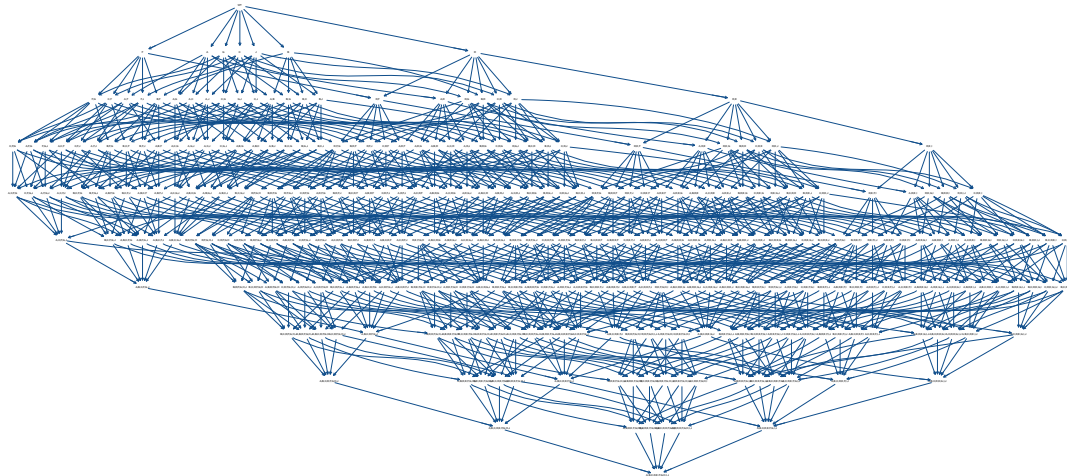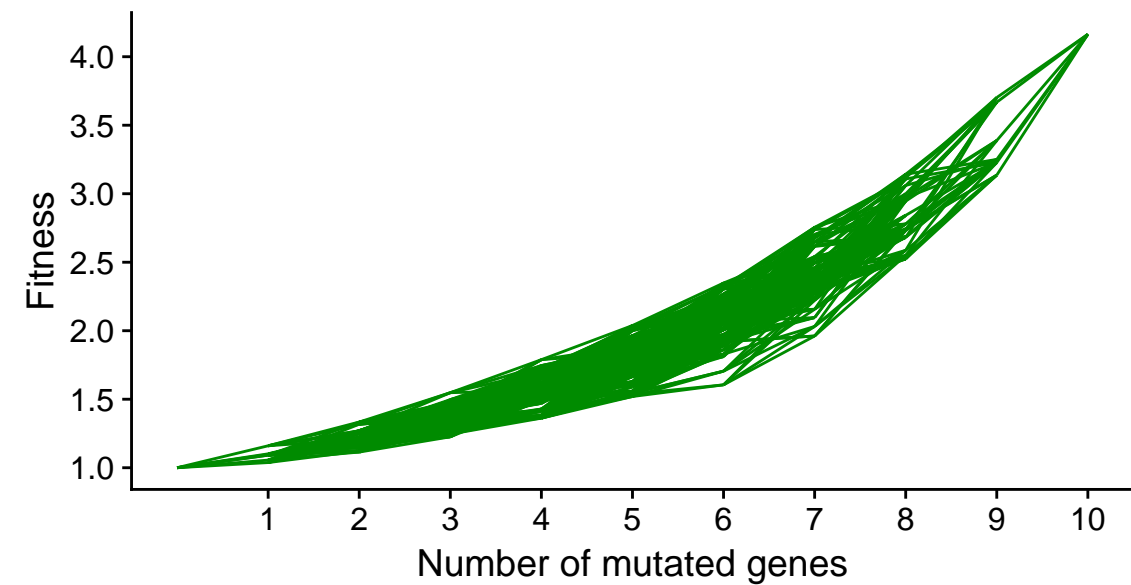

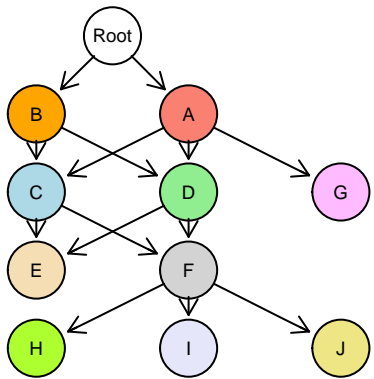

*ID* 6Lxt9hxPDEYs7HrO  
*acc genotypes* 46  
*peaks no back* 1  
*removed edges* 0  
*prop rem edges* 0

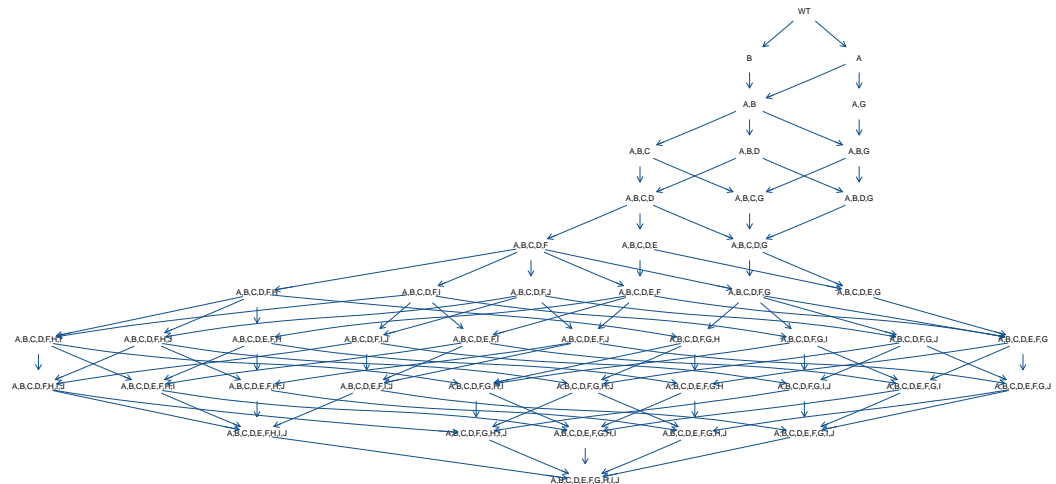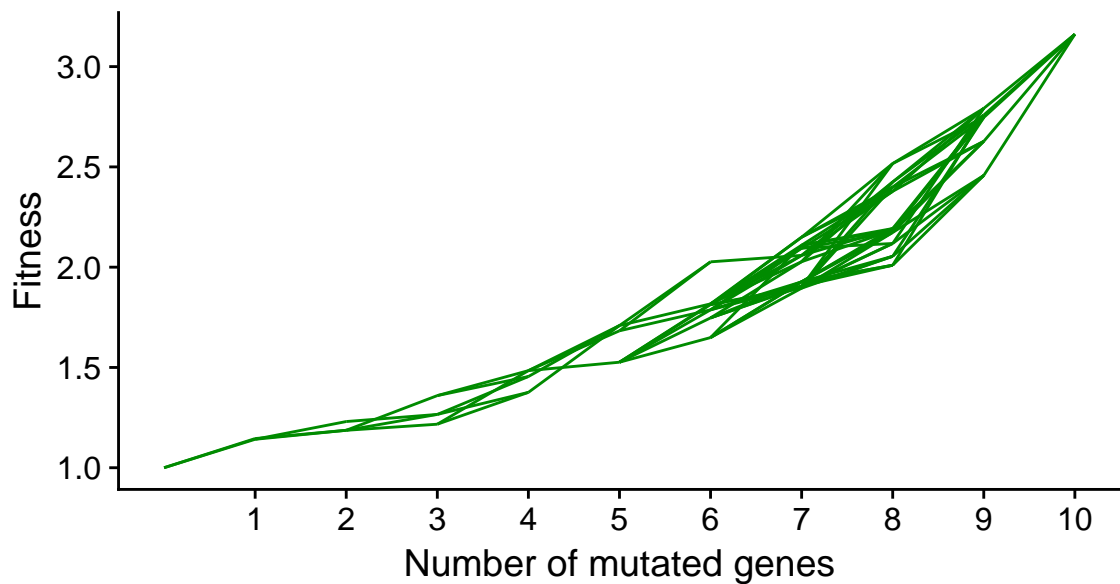

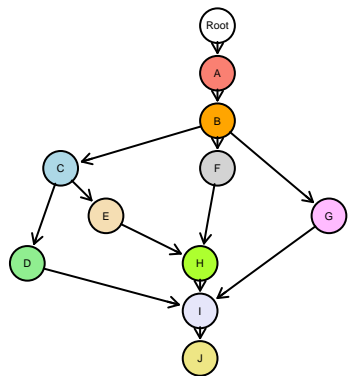

*ID* 7Fj7Va75pN1rV57O  
*acc genotypes* 28  
*peaks no back* 1  
*removed edges* 0  
*prop rem edges* 0

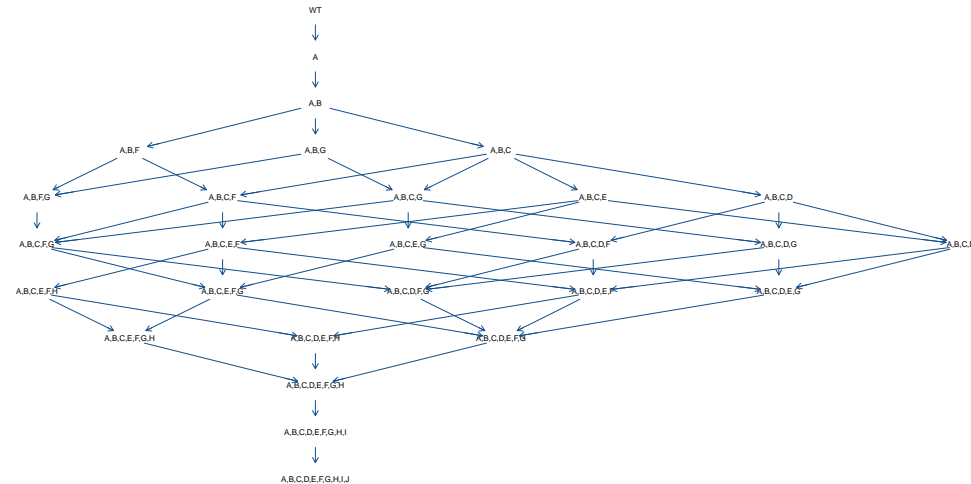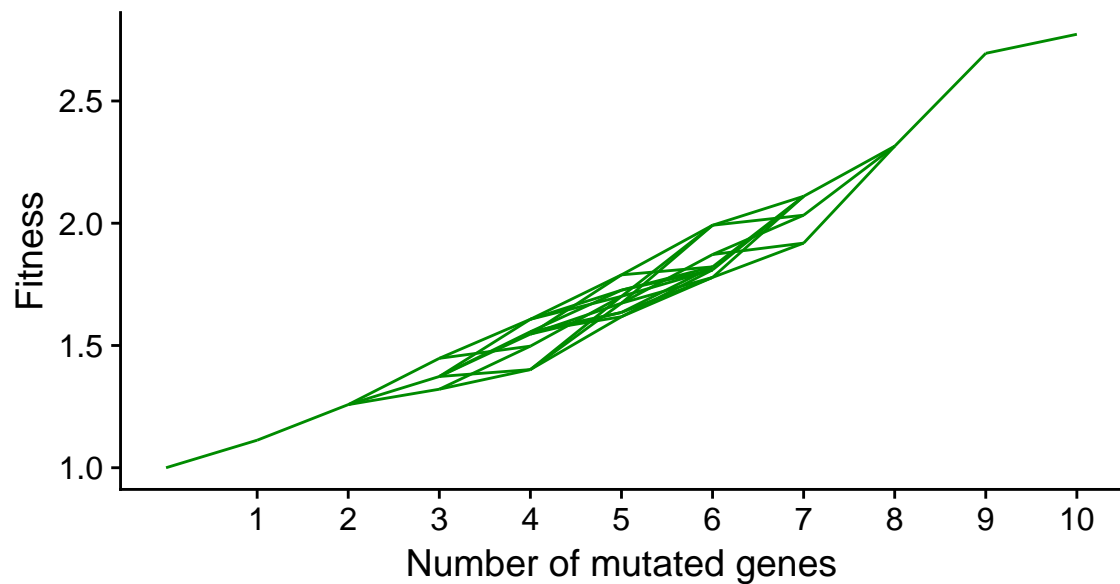

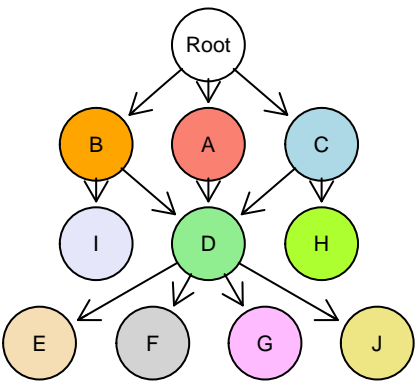

*ID* 7MYmvXyPDesmMhs  
*acc genotypes* 82  
*peaks no back* 1  
*removed edges* 0  
*prop rem edges* 0

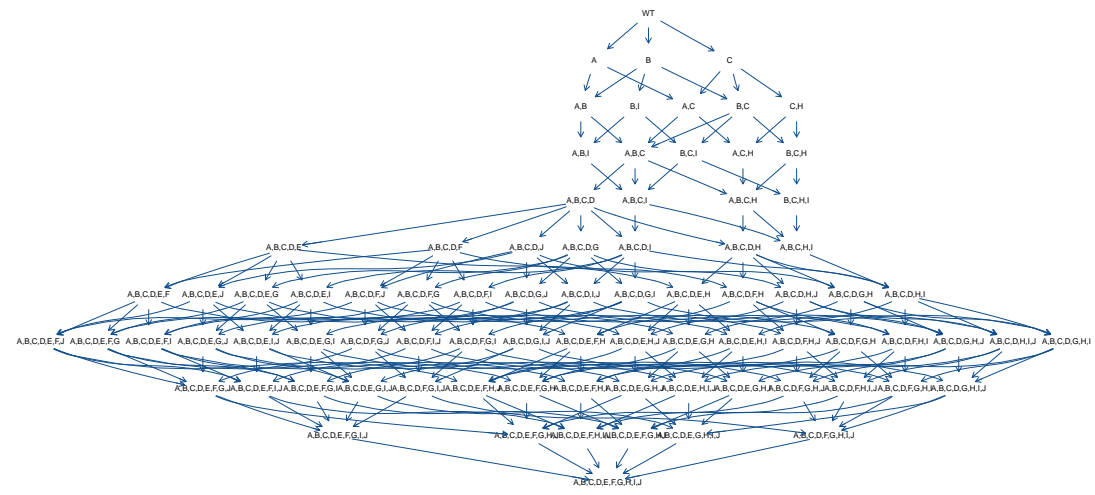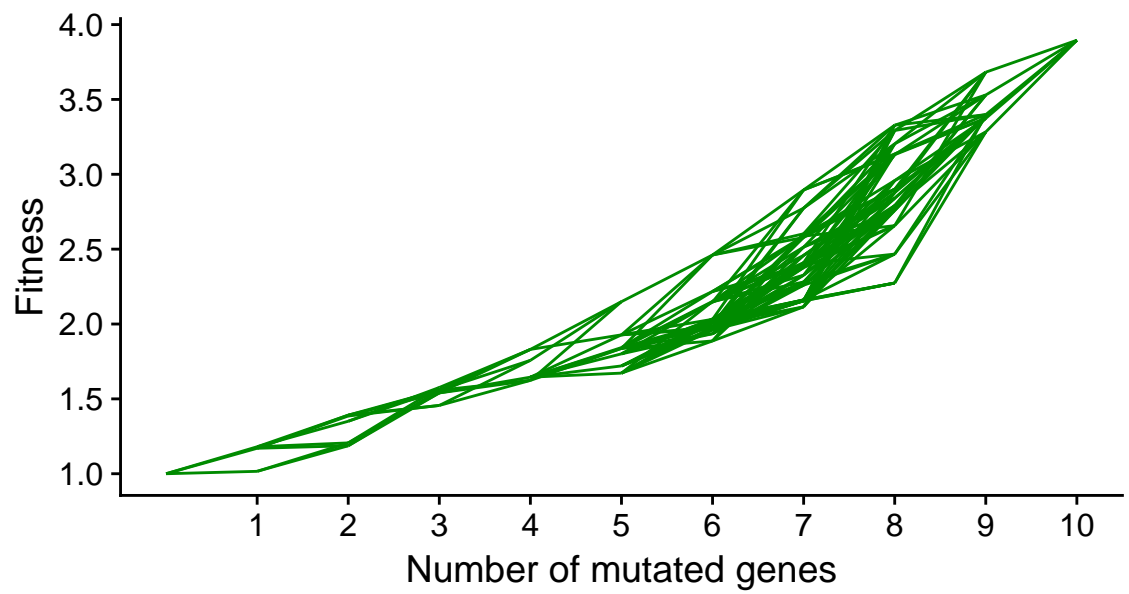

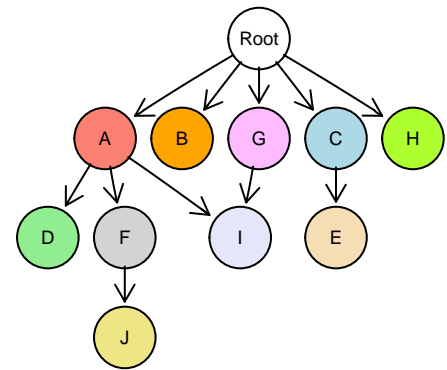

*ID* 7xha8OIAIqlZ4SXr  
*acc genotypes* 240  
*peaks no back* 1  
*removed edges* 0  
*prop rem edges* 0

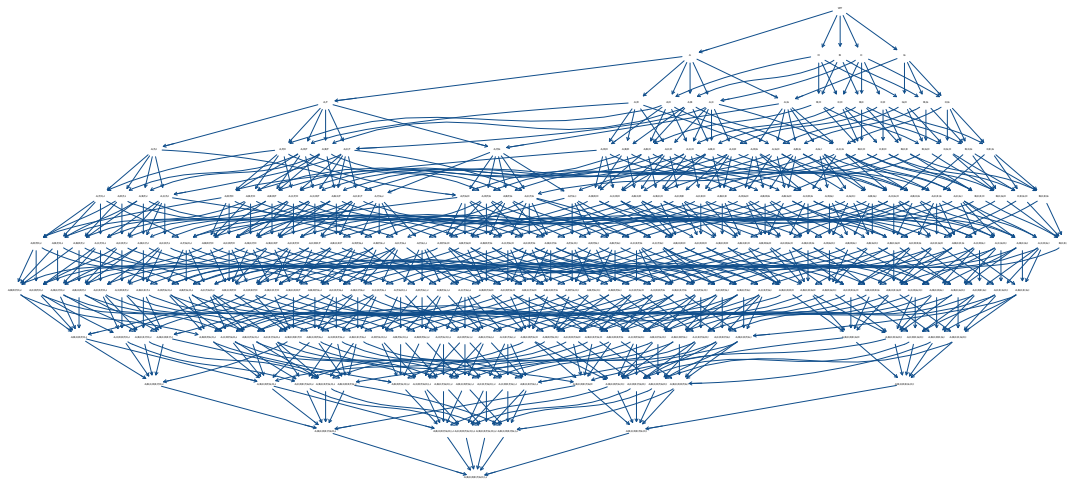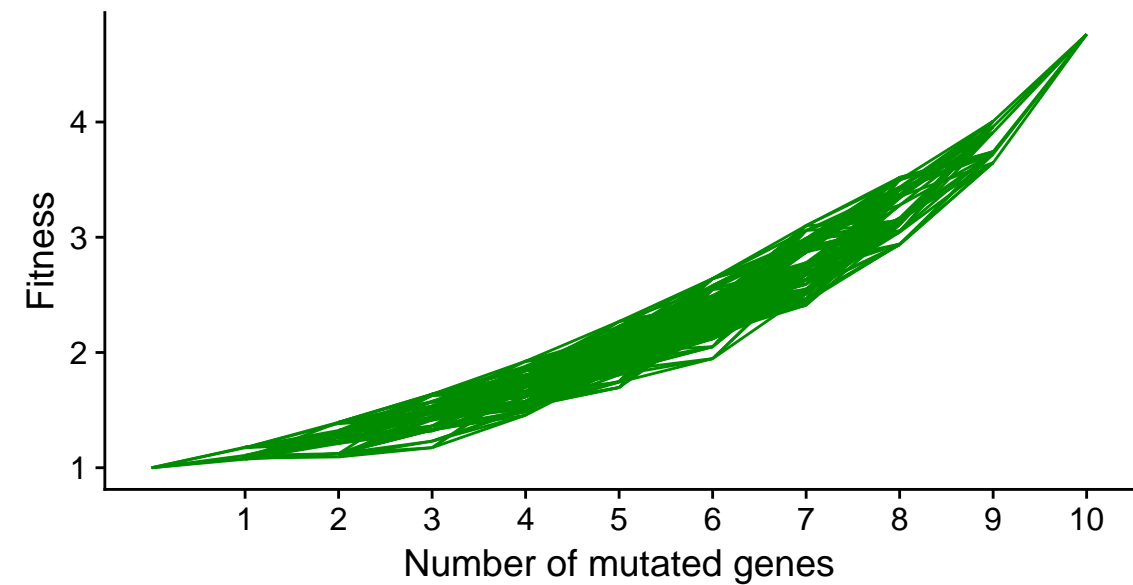



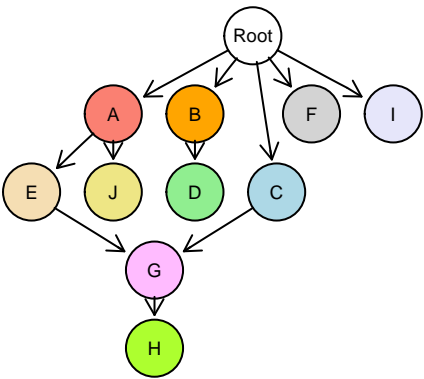

ID 84w3Yj1QSkf4zJx4  
 acc genotypes 168  
 peaks no back 1  
 removed edges 0  
 prop rem edges 0

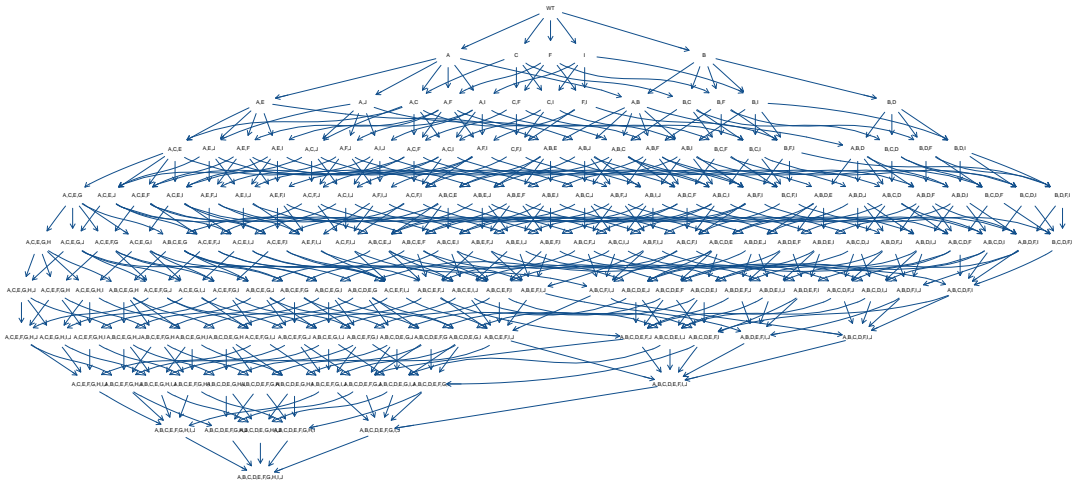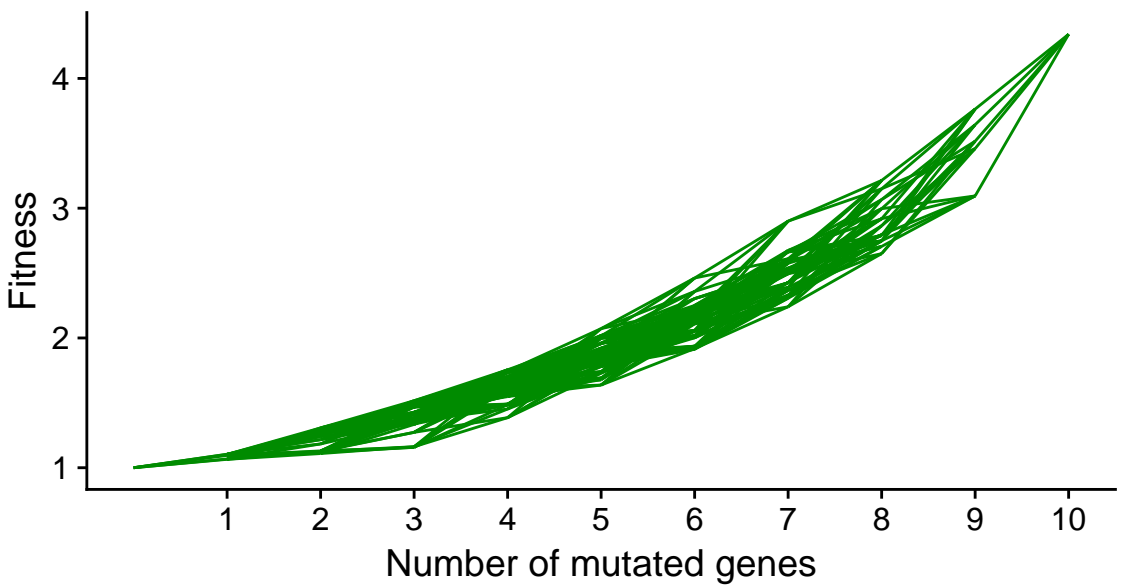

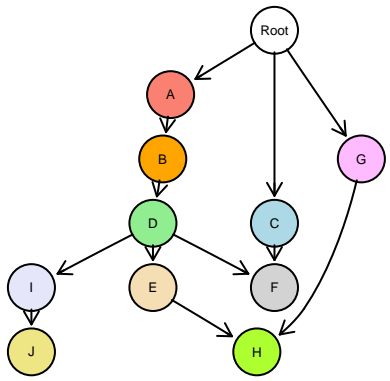

ID **8Libw9yeJgfs5Q95**  
 acc genotypes **57**  
 peaks no back 1  
 removed edges 0  
 prop rem edges 0

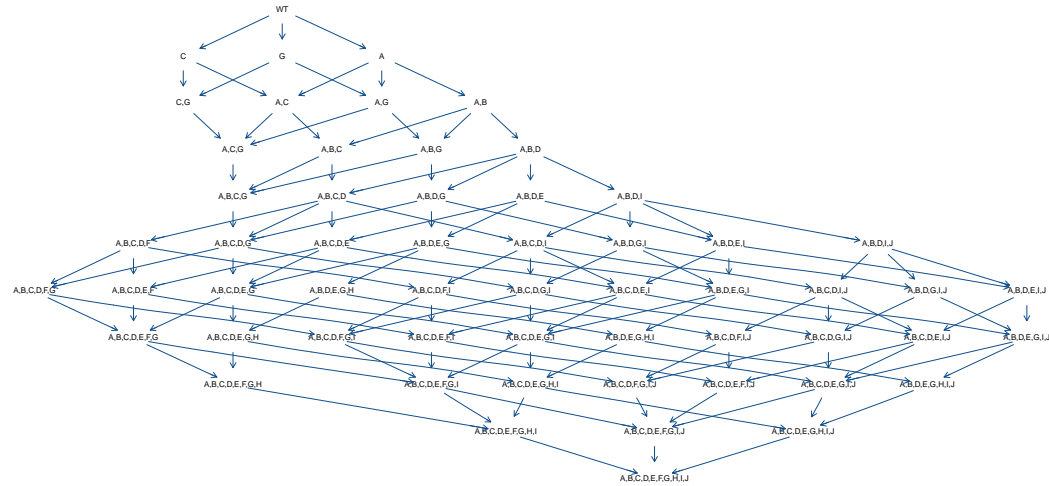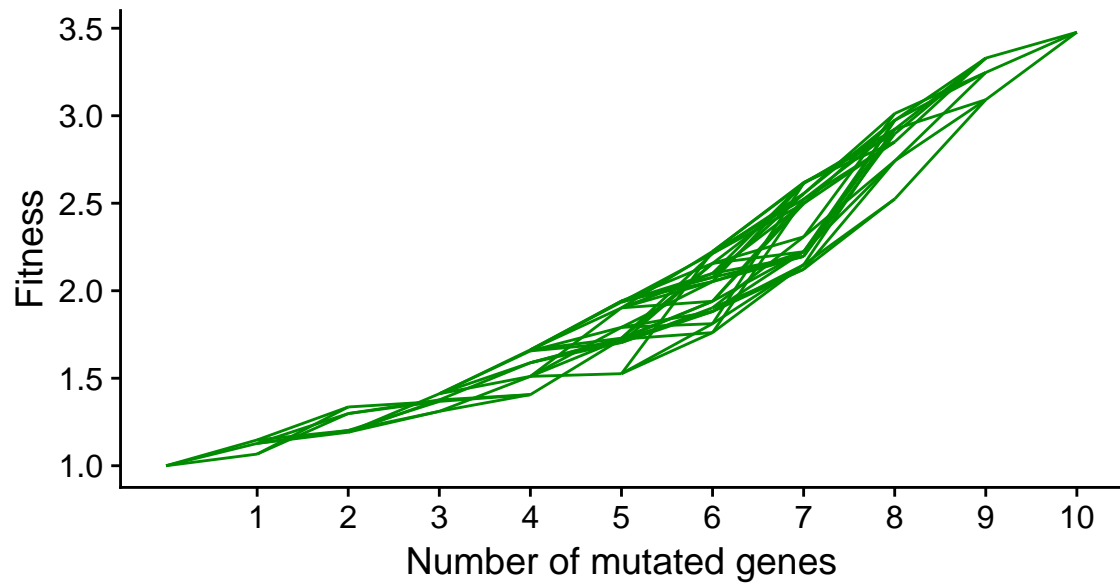

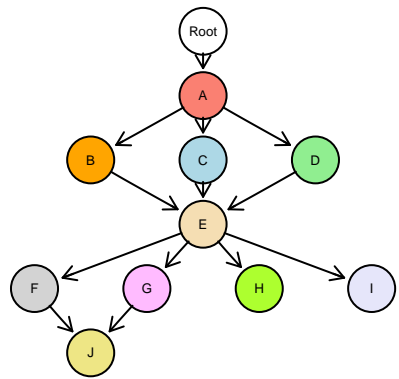

ID 9wKr6Qeu5I92VwmA  
 acc genotypes 29  
 peaks no back 1  
 removed edges 0  
 prop rem edges 0

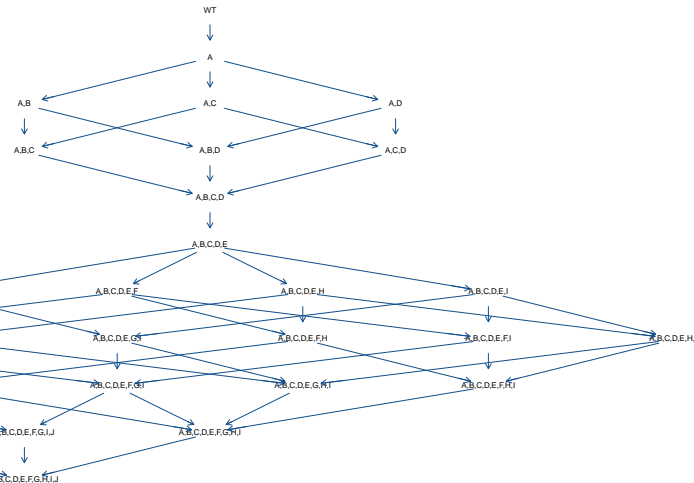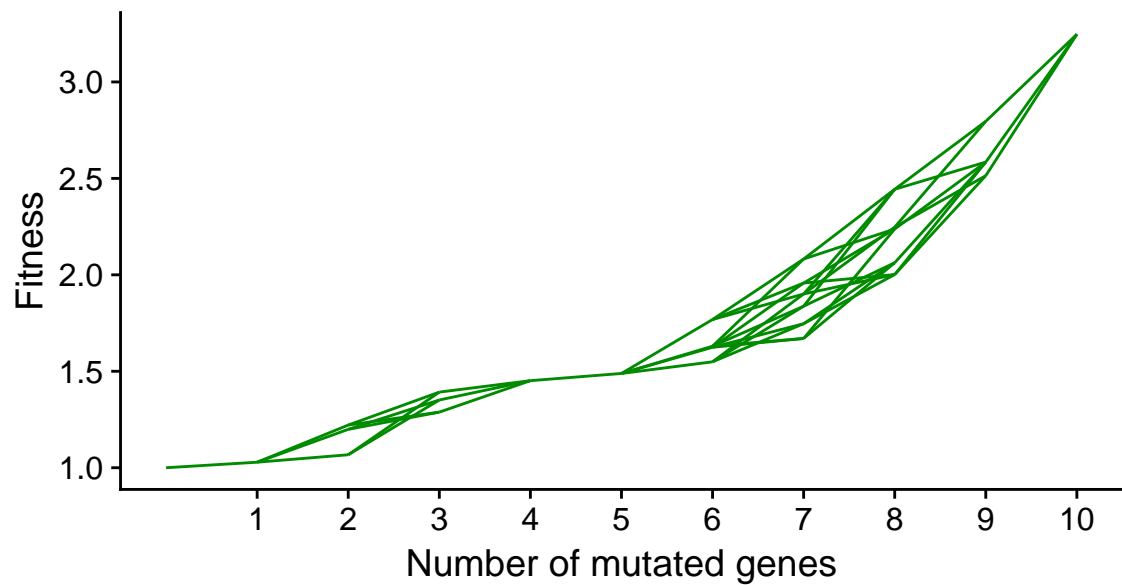

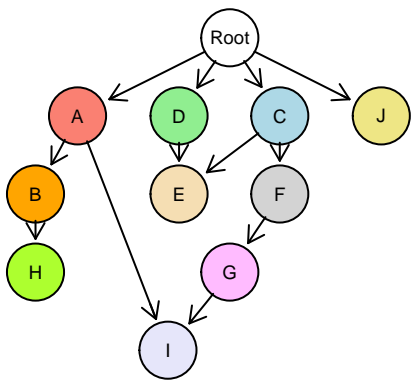

*ID* ad9ndClhE585IPSN  
*acc genotypes* 106  
*peaks no back* 1  
*removed edges* 0  
*prop rem edges* 0

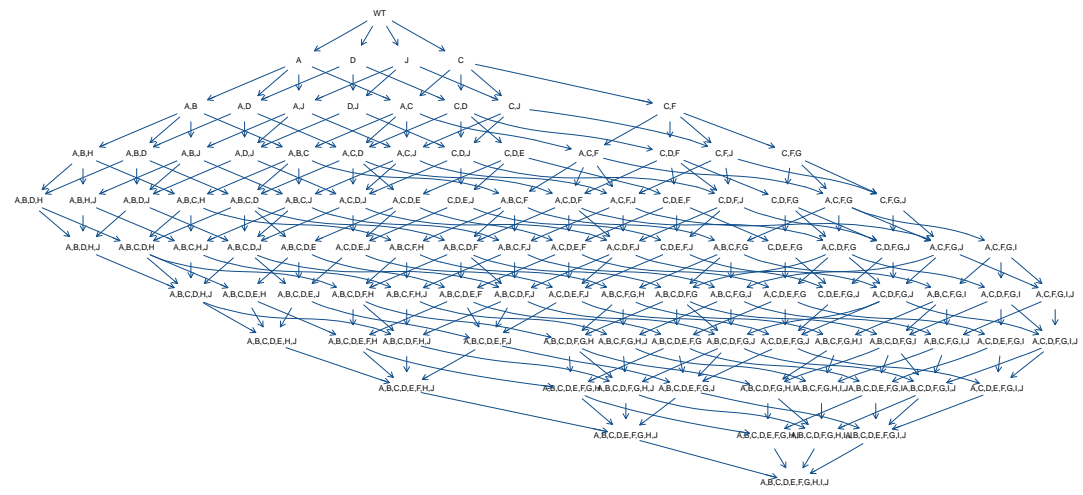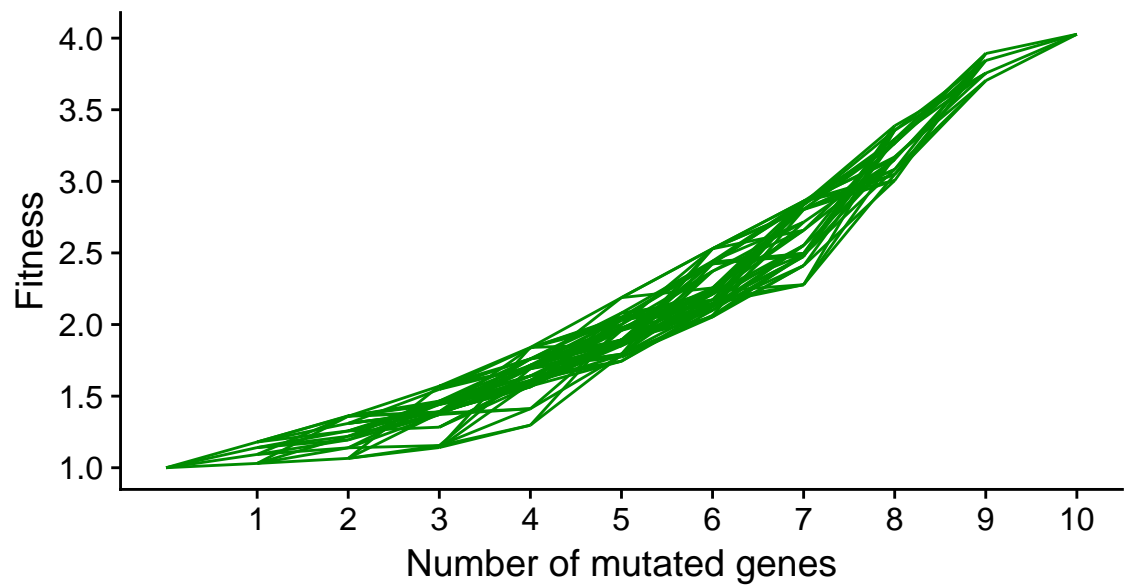

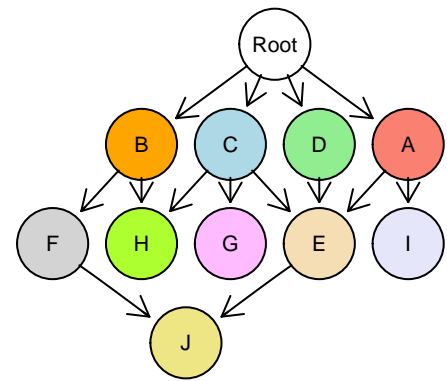

ID AFZHDDg9eZ1wABOd  
 acc genotypes 106  
 peaks no back 1  
 removed edges 0  
 prop rem edges 0

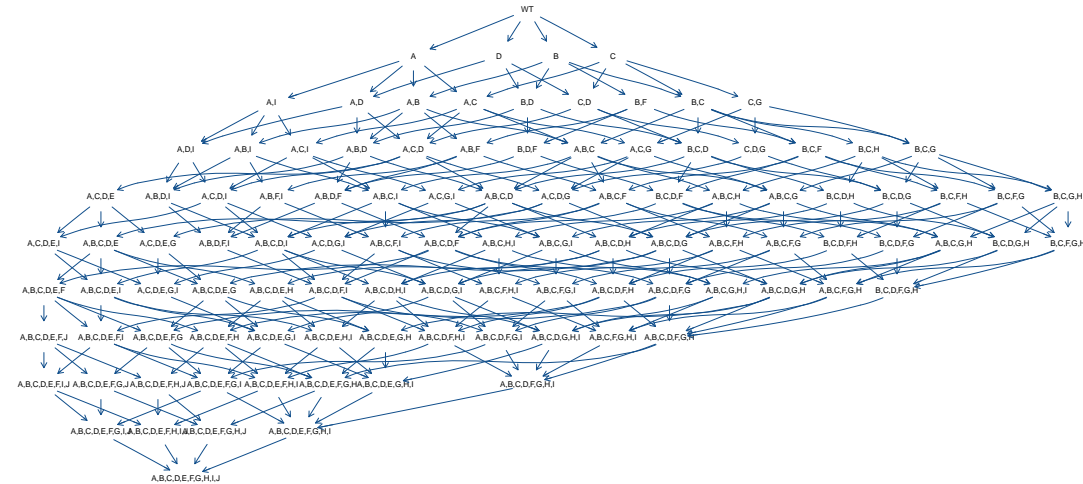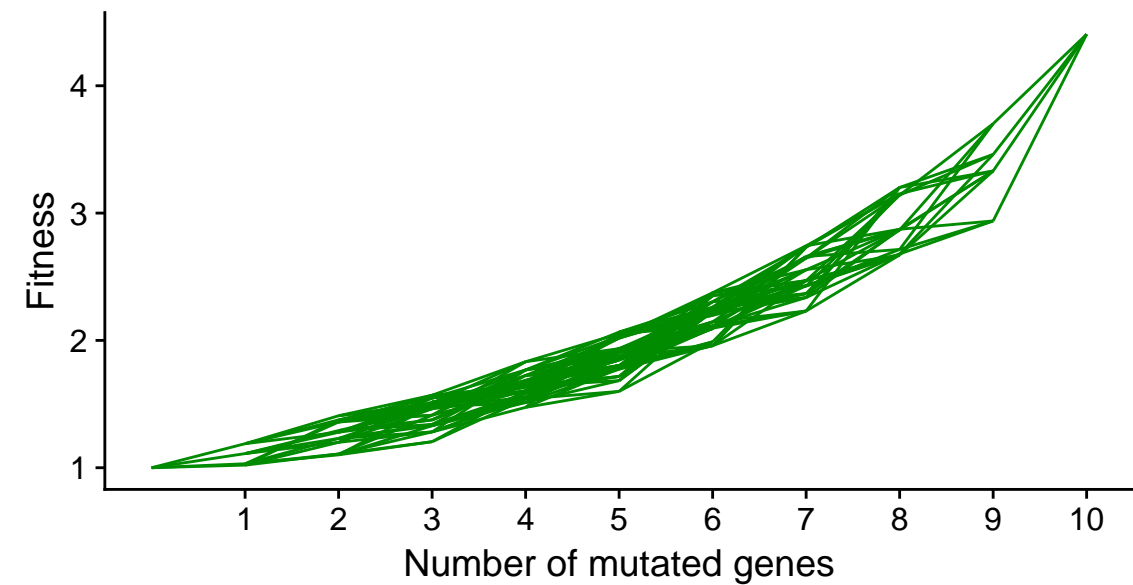

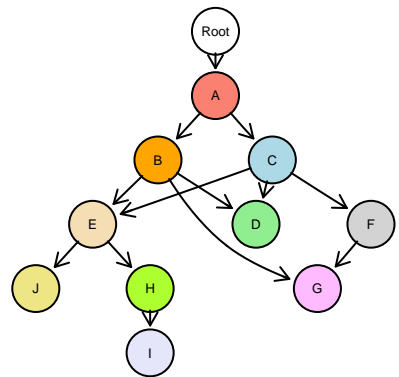

ID **ALSuQeDPTtbq8ING**  
 acc genotypes **47**  
 peaks no back 1  
 removed edges 0  
 prop rem edges 0

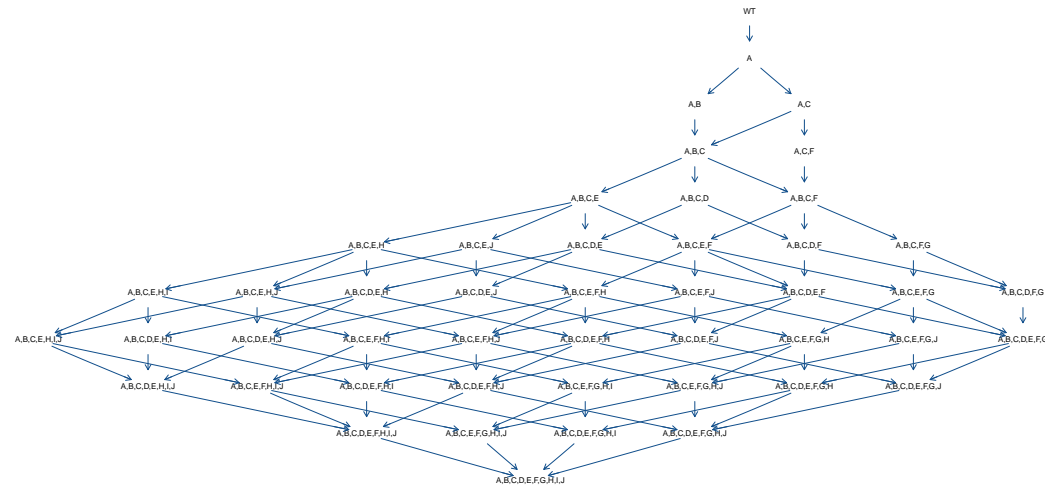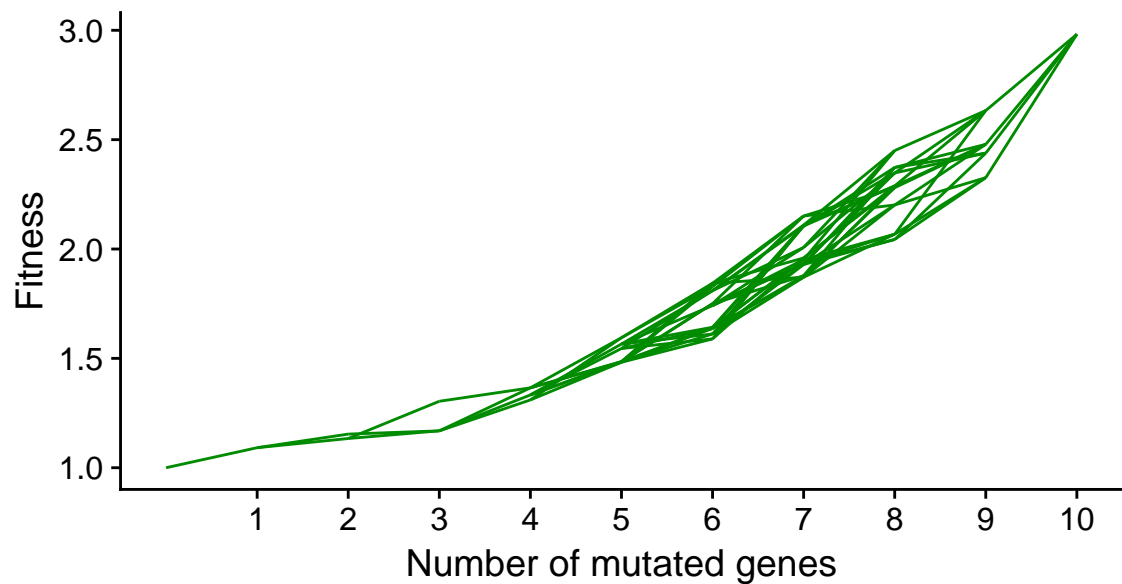

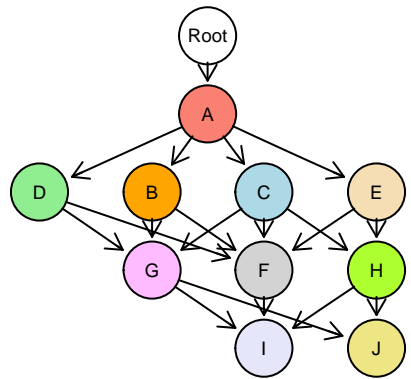

ID AV7D5TvJW78F1xWP  
 acc genotypes 32  
 peaks no back 1  
 removed edges 0  
 prop rem edges 0

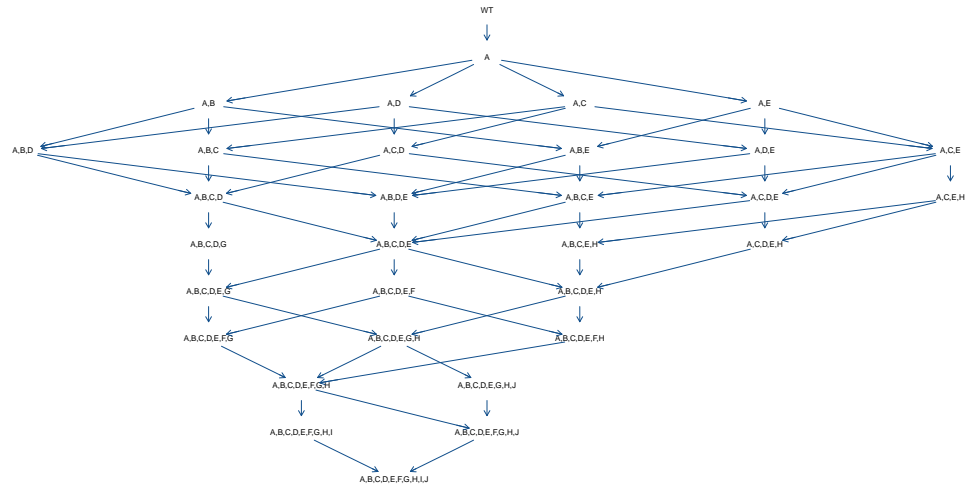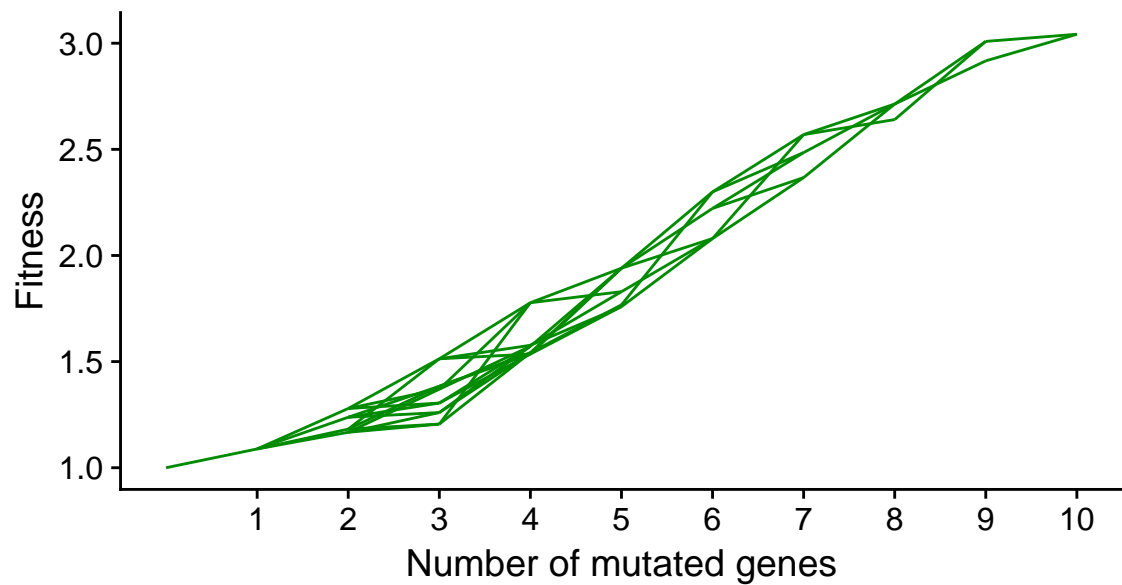

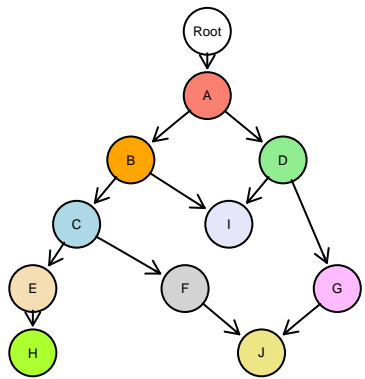

*ID* AzcqFM9ljyJEevU2  
*acc genotypes* 45  
*peaks no back* 1  
*removed edges* 0  
*prop rem edges* 0

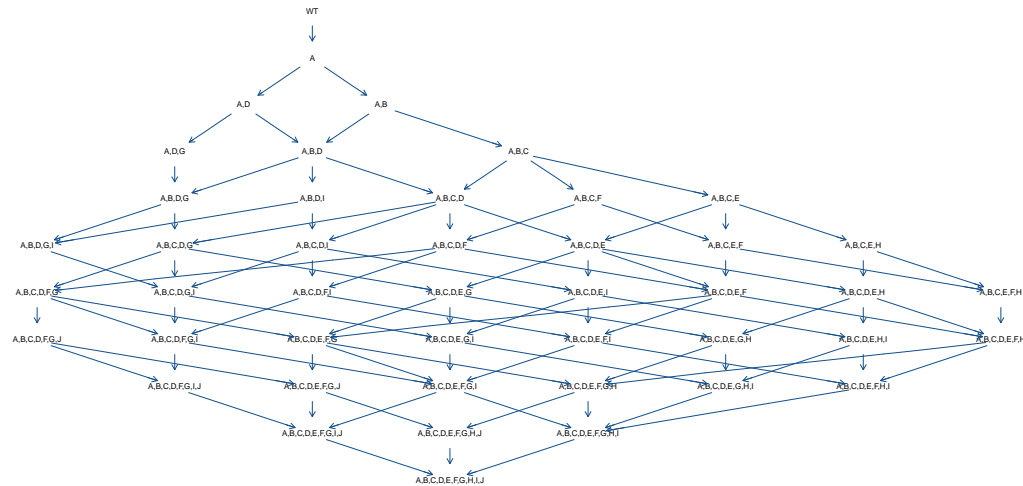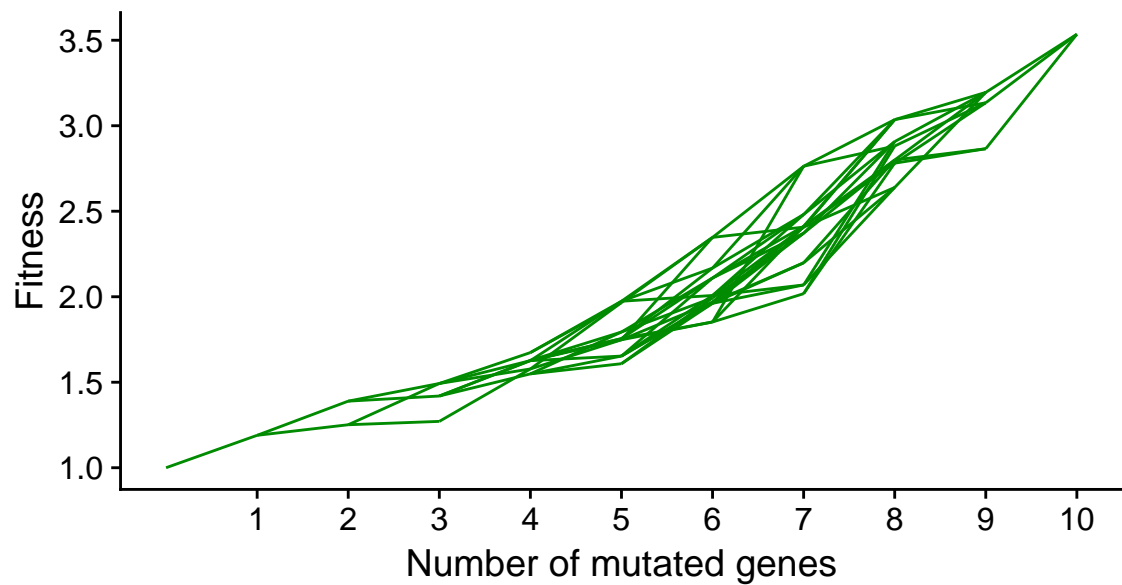



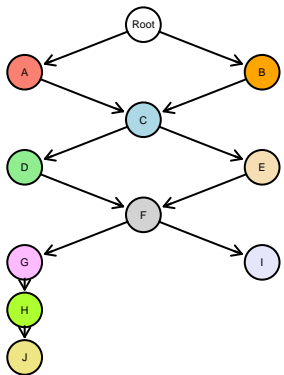

ID B2Xyqnt5VTgzAZsS  
 acc genotypes 16  
 peaks no back 1  
 removed edges 0  
 prop rem edges 0

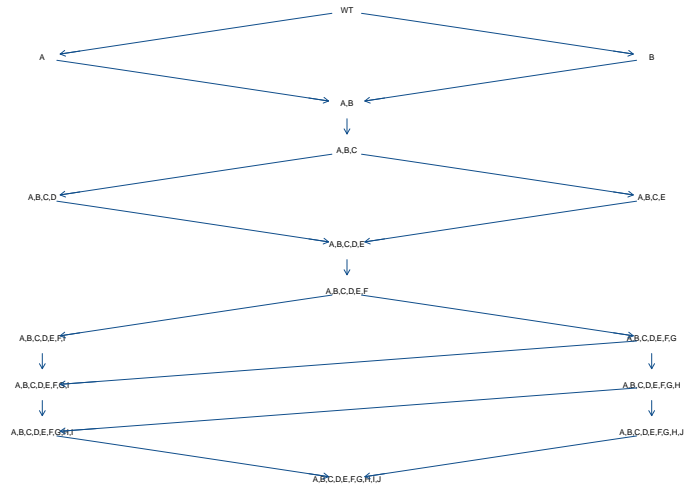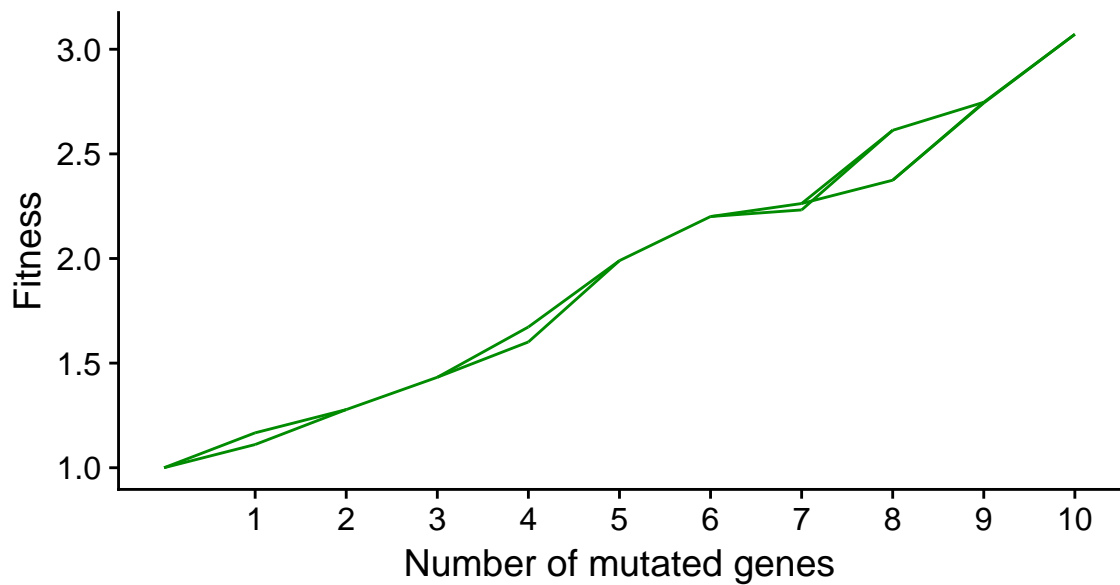

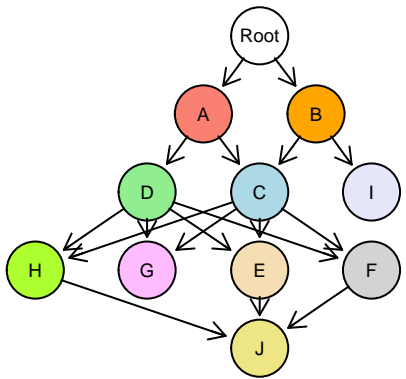

ID **b6lqOPrfURmxrTRJ**  
 acc genotypes **47**  
 peaks no back 1  
 removed edges 0  
 prop rem edges 0

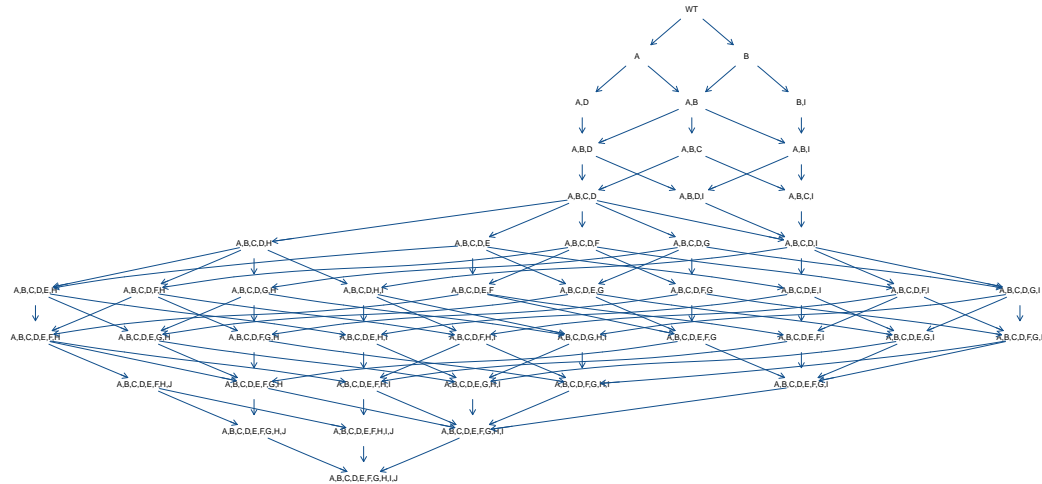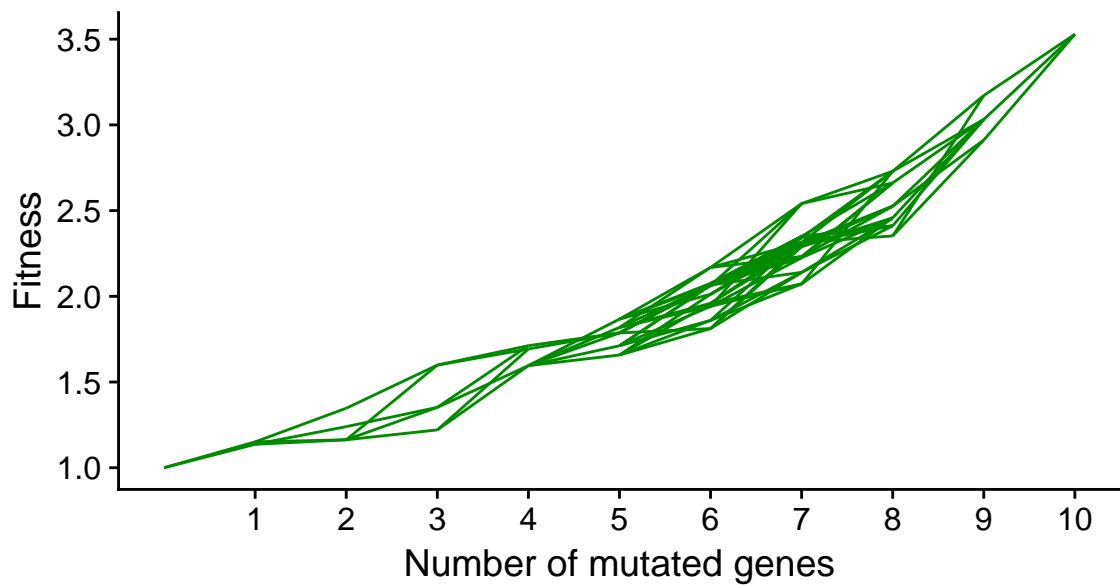

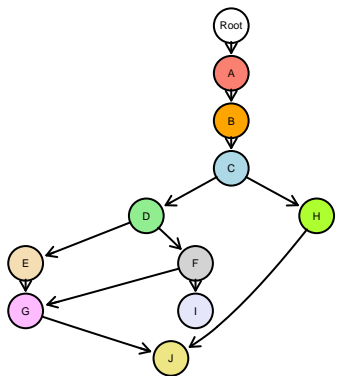

ID **BkSjd8cAWeN4eVyO**  
 acc genotypes **23**  
 peaks no back **1**  
 removed edges **0**  
 prop rem edges **0**

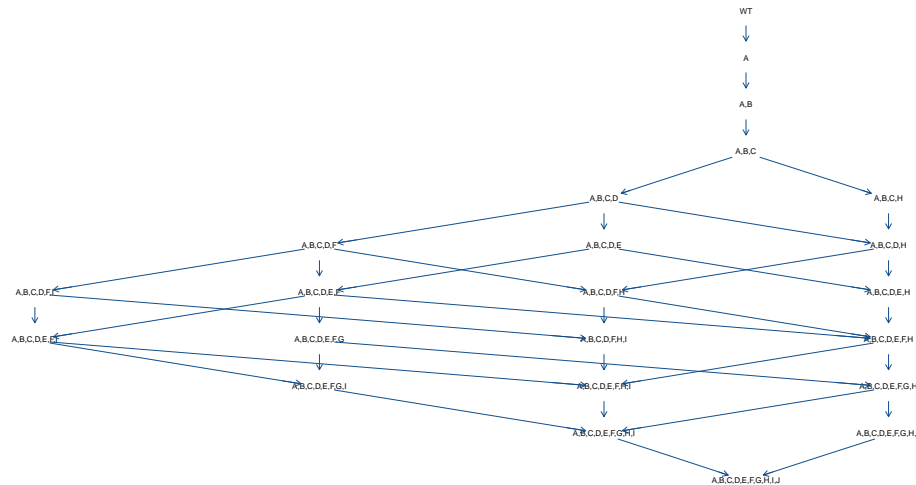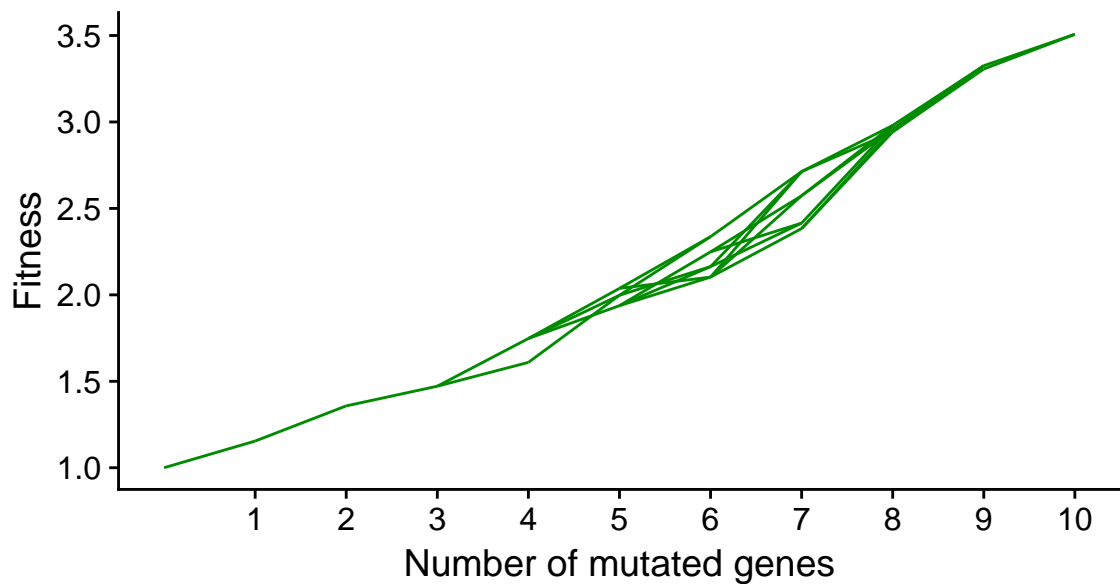

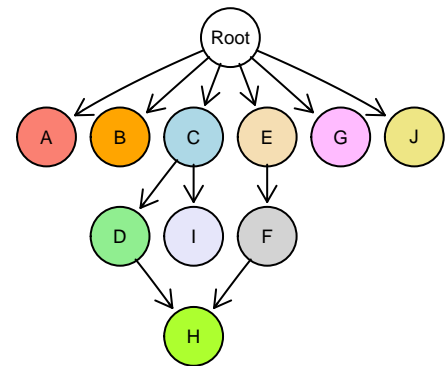

*ID* BqTdapi2oHdGJNeQ  
*acc genotypes* 272  
*peaks no back* 1  
*removed edges* 0  
*prop rem edges* 0

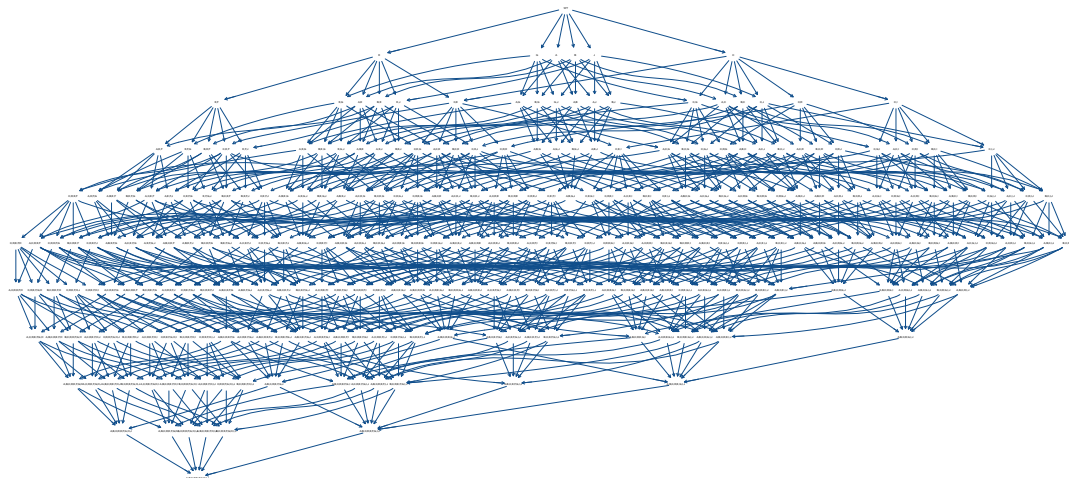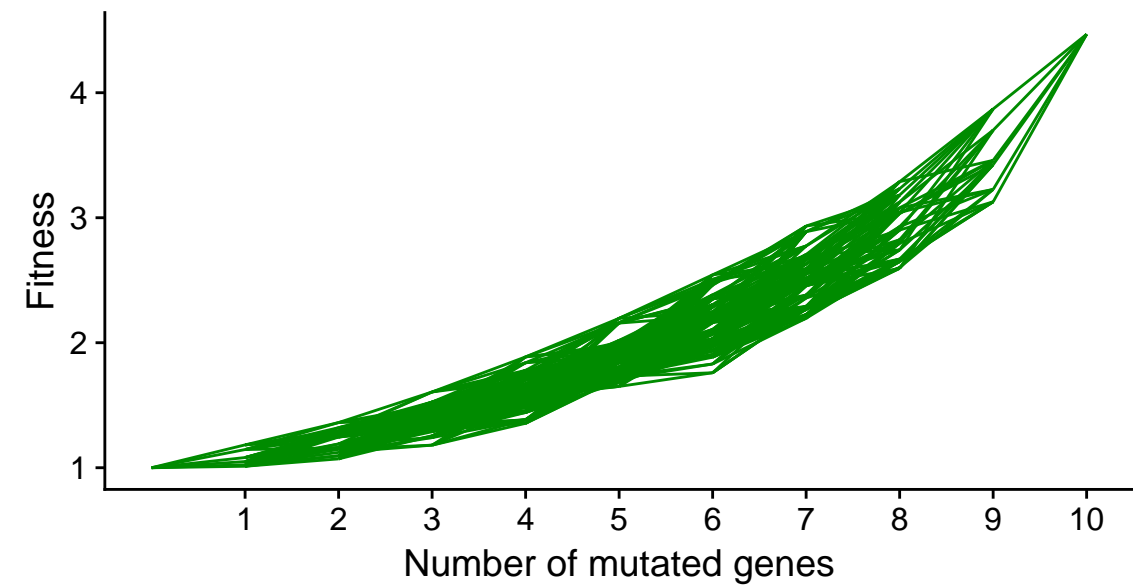

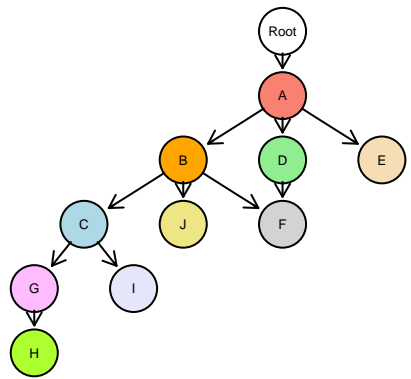

ID **bTi93VZQ3TjAOVaY**  
 acc genotypes **89**  
 peaks no back **1**  
 removed edges **0**  
 prop rem edges **0**

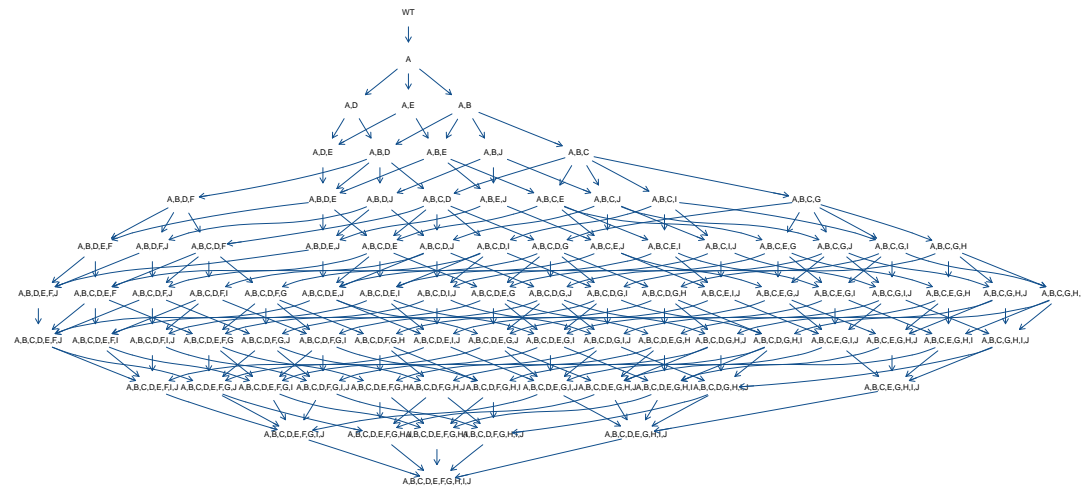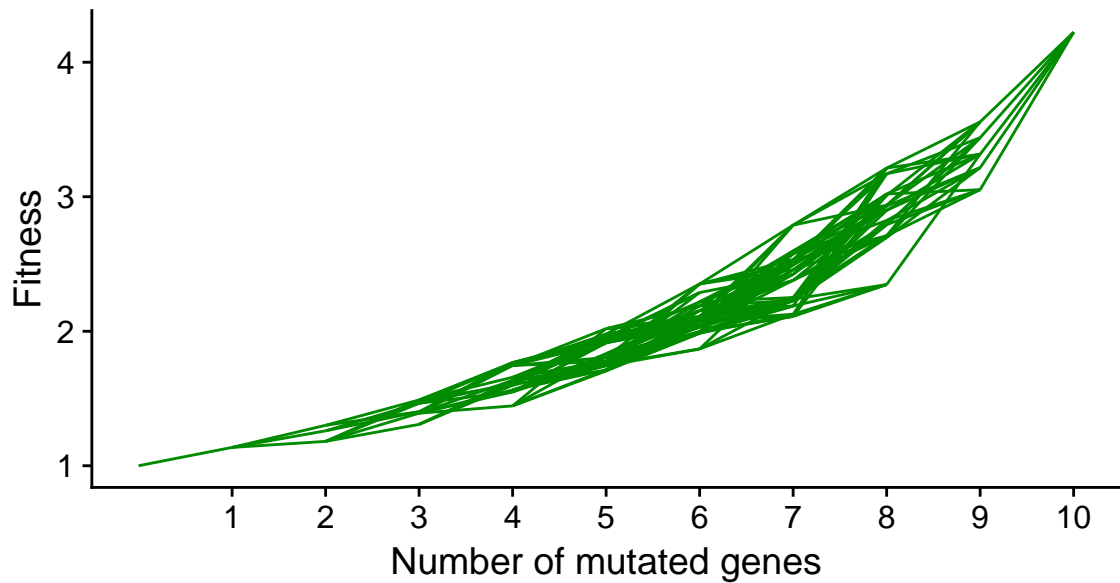

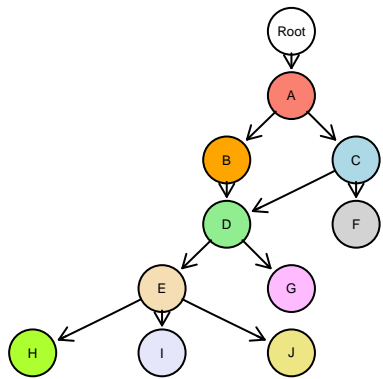

ID BU2srhsWr1UEIvS  
 acc genotypes 43  
 peaks no back 1  
 removed edges 0  
 prop rem edges 0

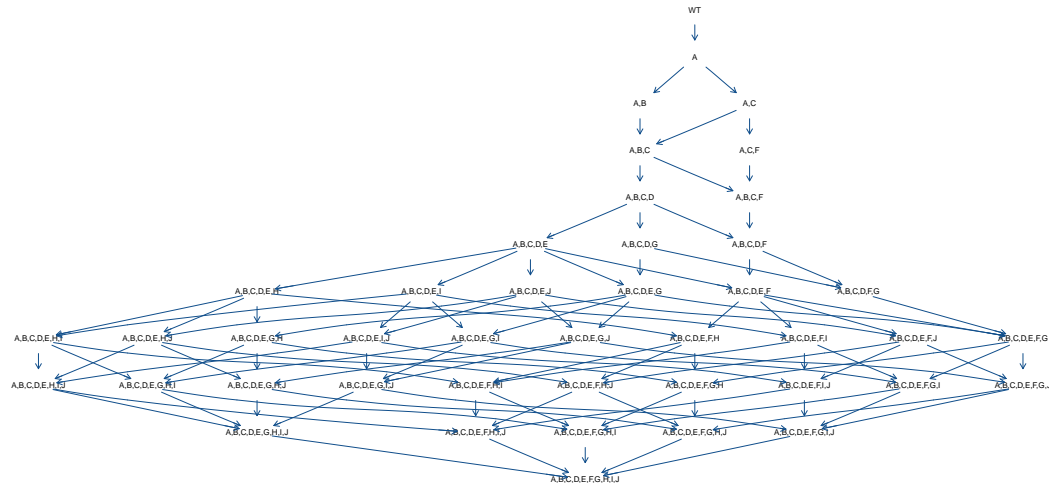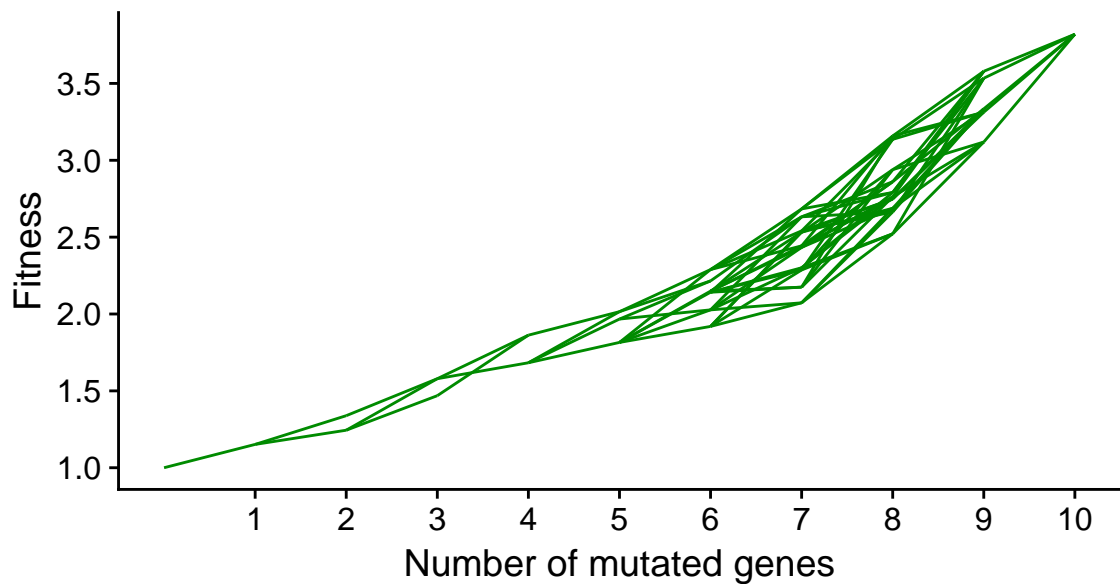

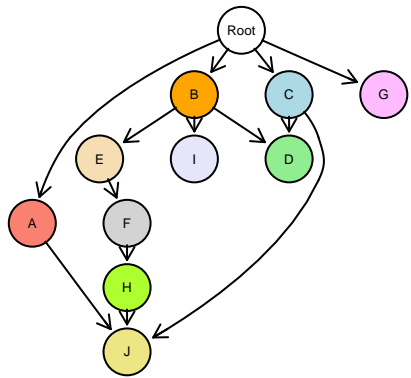

*ID* **bv105Mh6IDH10HPdOB**  
*acc genotypes* **112**  
*peaks no back* 1  
*removed edges* 0  
*prop rem edges* 0

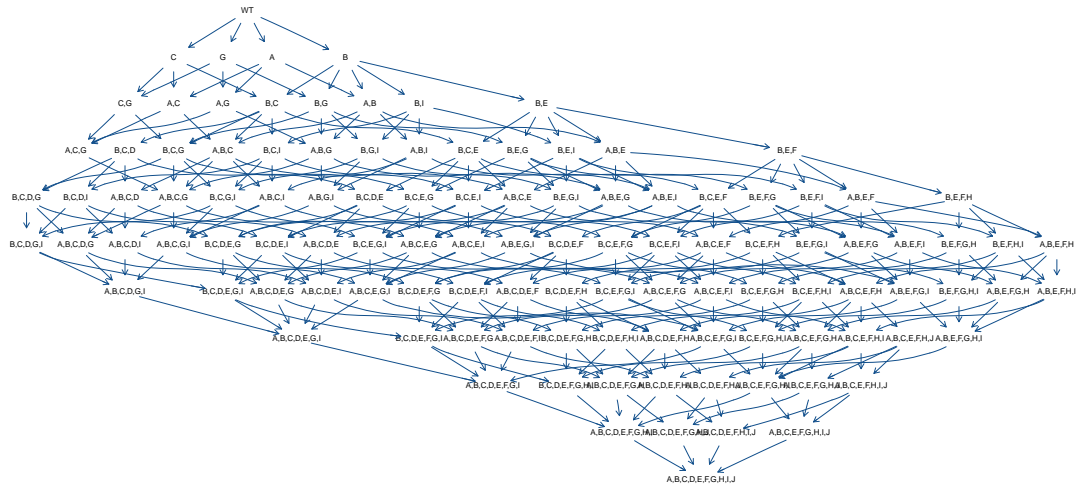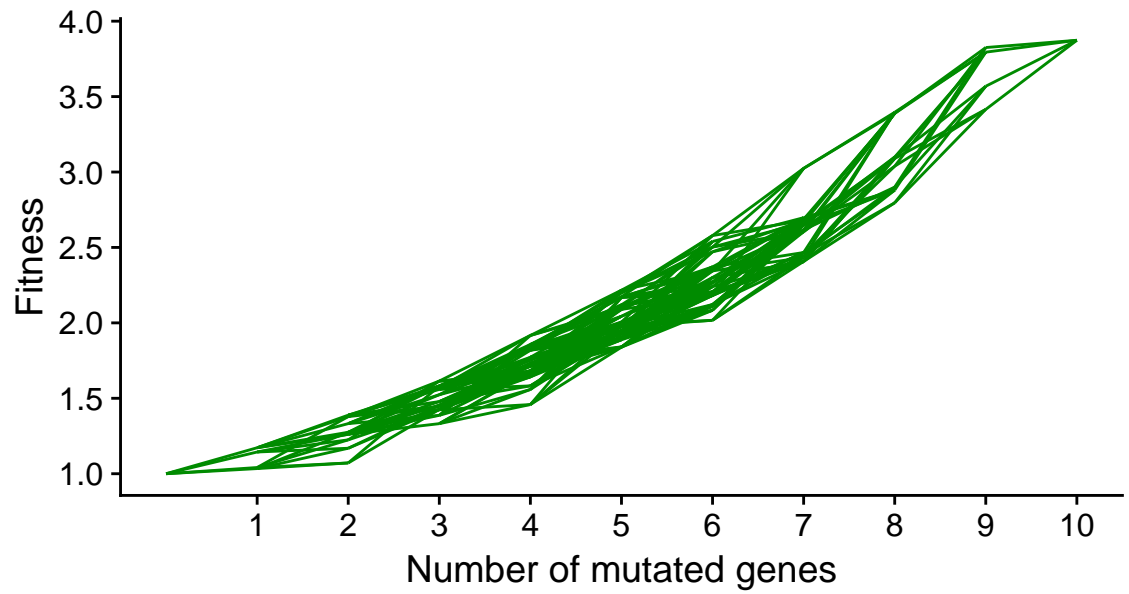

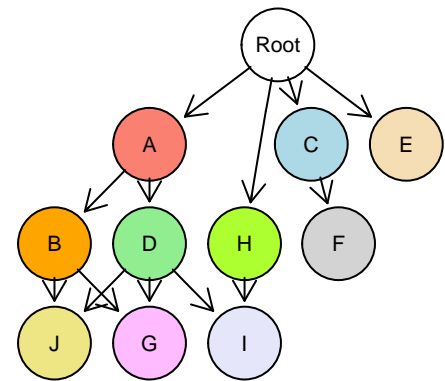

*ID* BWkhGPzysNbGoq1  
*acc genotypes* 126  
*peaks no back* 1  
*removed edges* 0  
*prop rem edges* 0

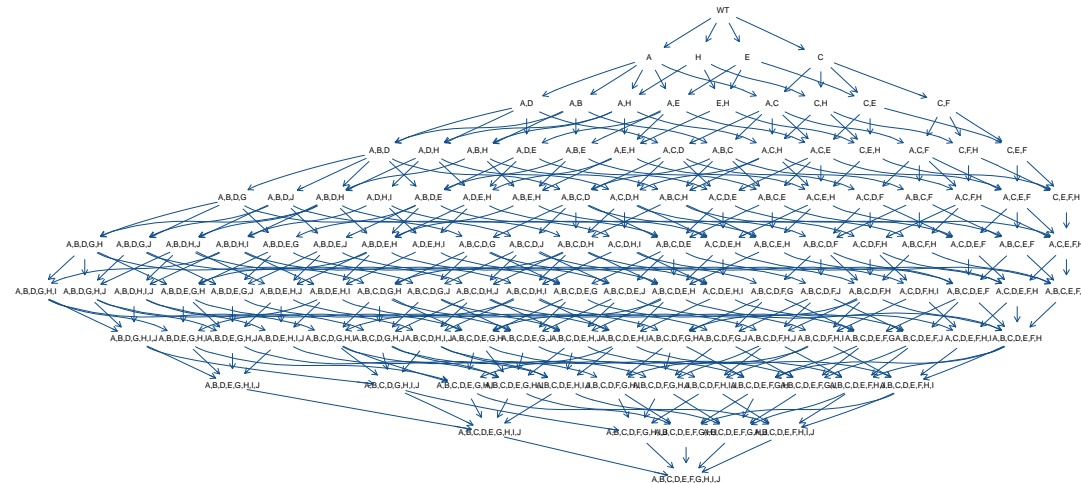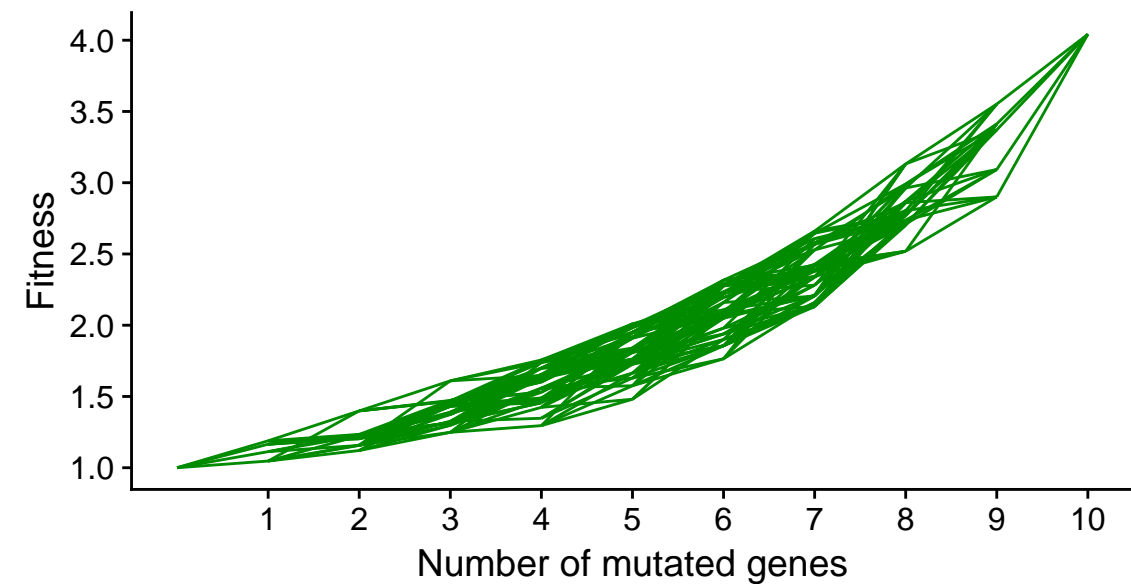



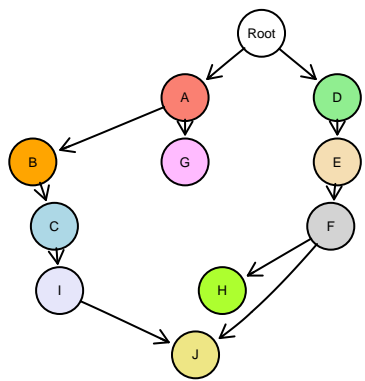

*ID*      **bXvsBjdeGDgk10nj**  
*acc genotypes*      **49**  
*peaks no back*      **1**  
*removed edges*      **0**  
*prop rem edges*      **0**

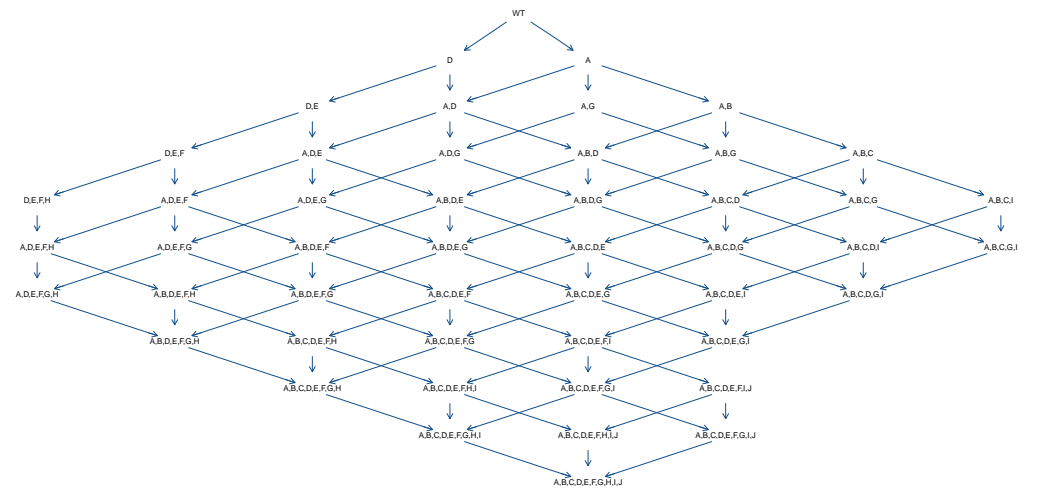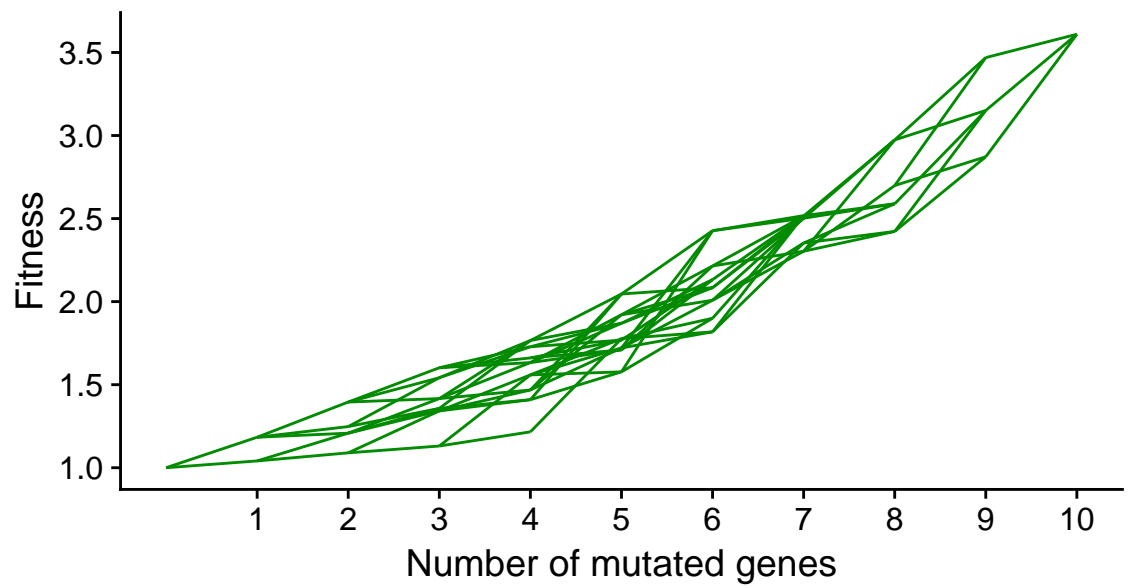

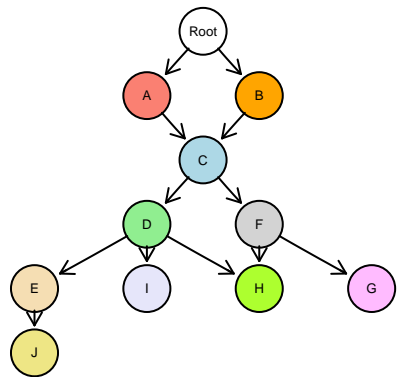

ID **c4ImcRIDBXQaiAza**  
 acc genotypes **37**  
 peaks no back **1**  
 removed edges **0**  
 prop rem edges **0**

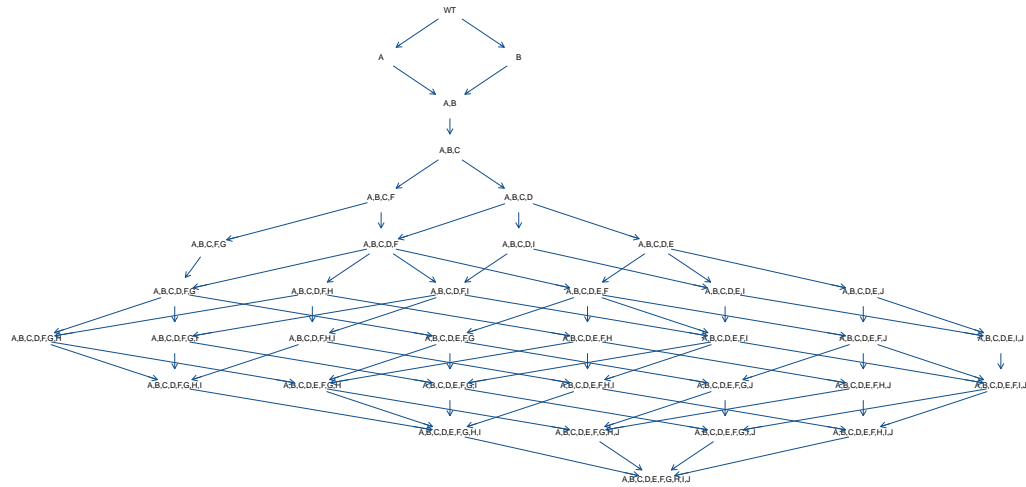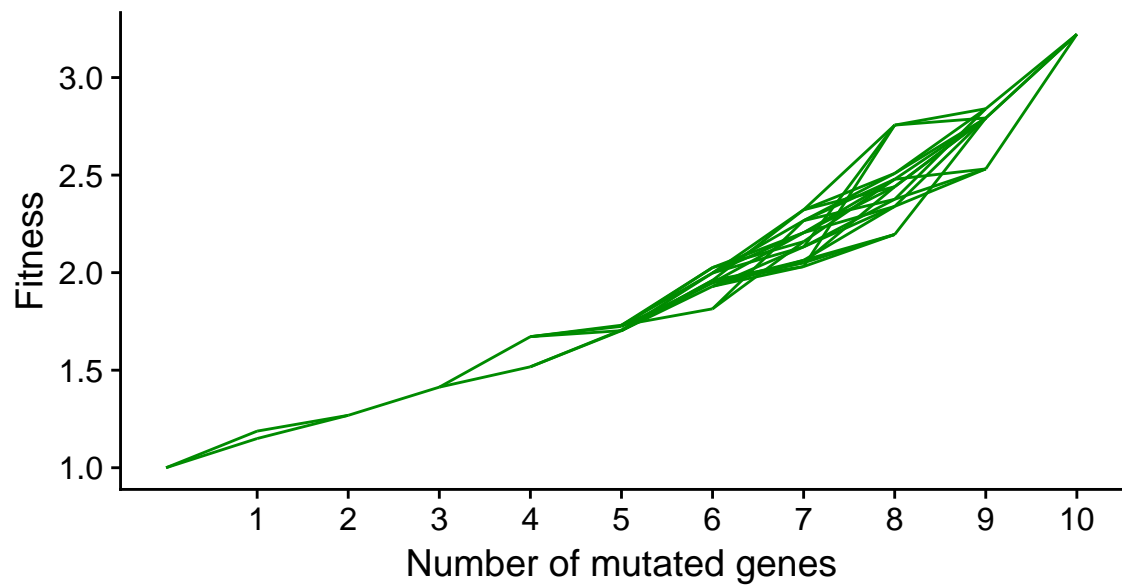

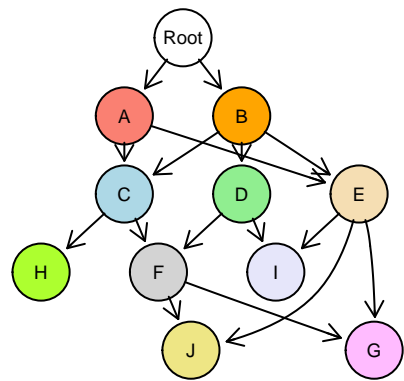

*ID* cczLUqQeSfB6Czbr  
*acc genotypes* 37  
*peaks no back* 1  
*removed edges* 0  
*prop rem edges* 0

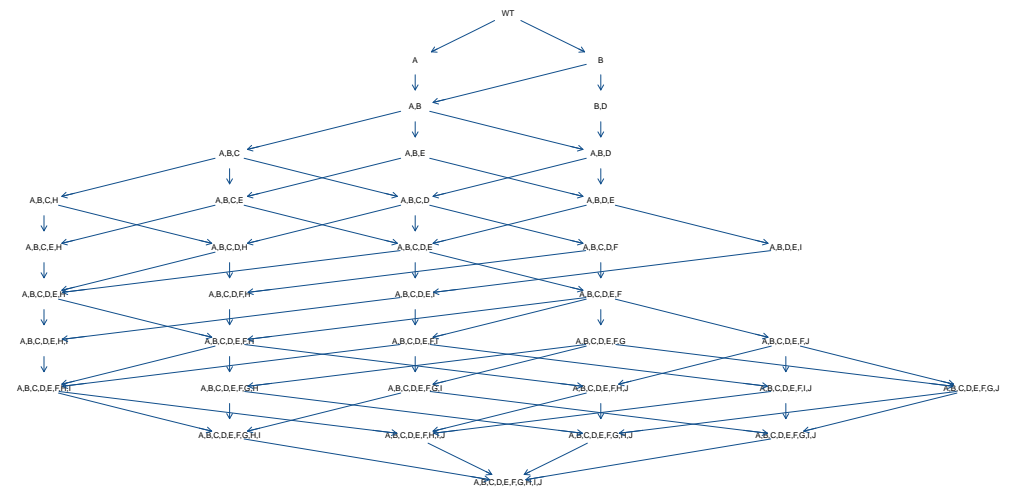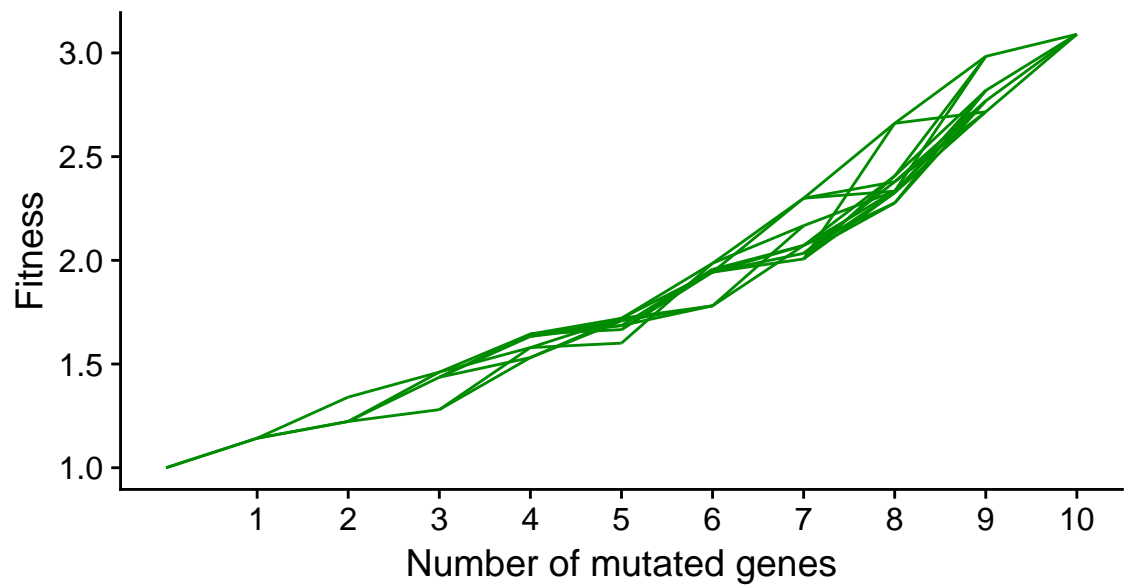

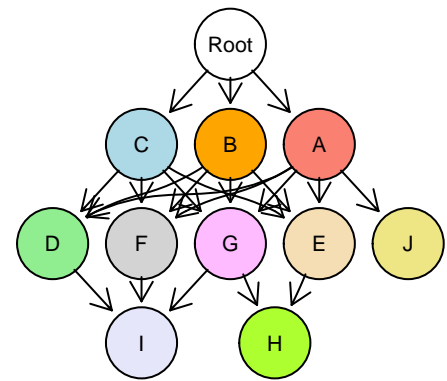

ID **CEKKz1011cQcW3hT7**  
 acc genotypes **56**  
 peaks no back 1  
 removed edges 0  
 prop rem edges 0

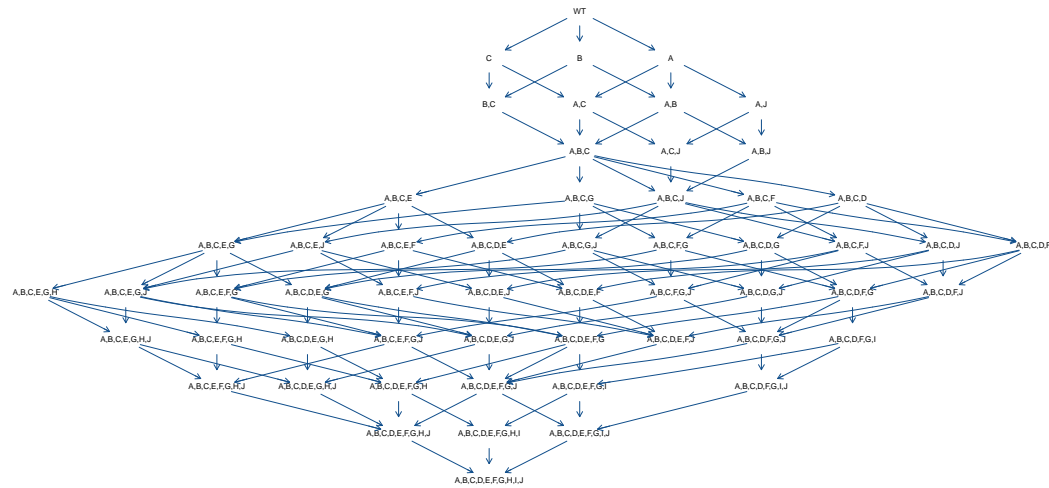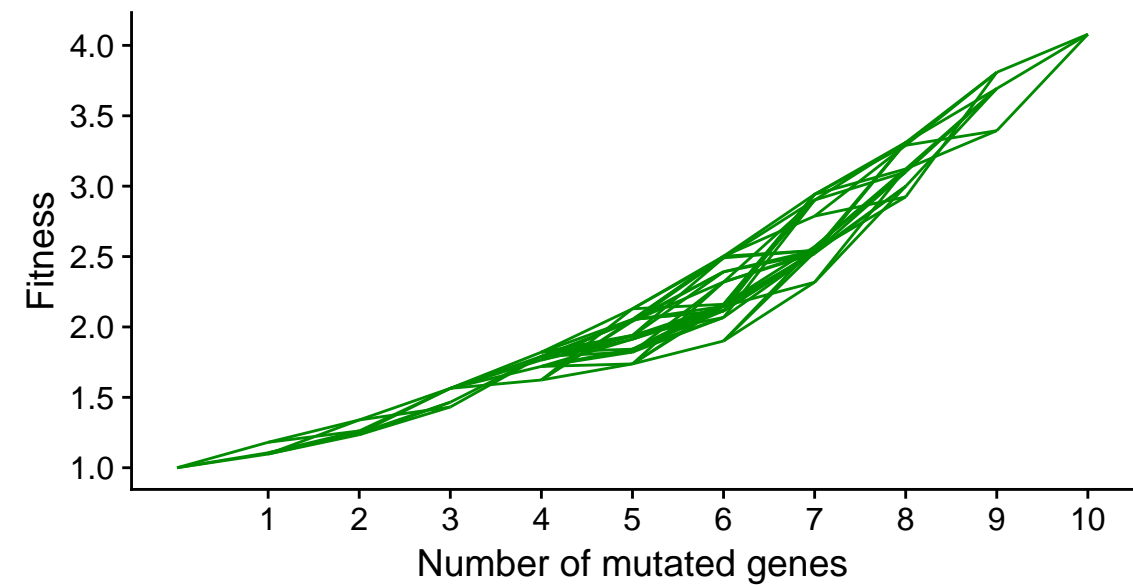

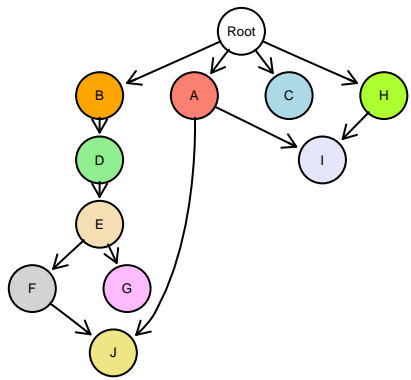

*ID*      **COhbmK810IA2tC32X**  
*acc genotypes*      **82**  
*peaks no back*      **1**  
*removed edges*      **0**  
*prop rem edges*      **0**

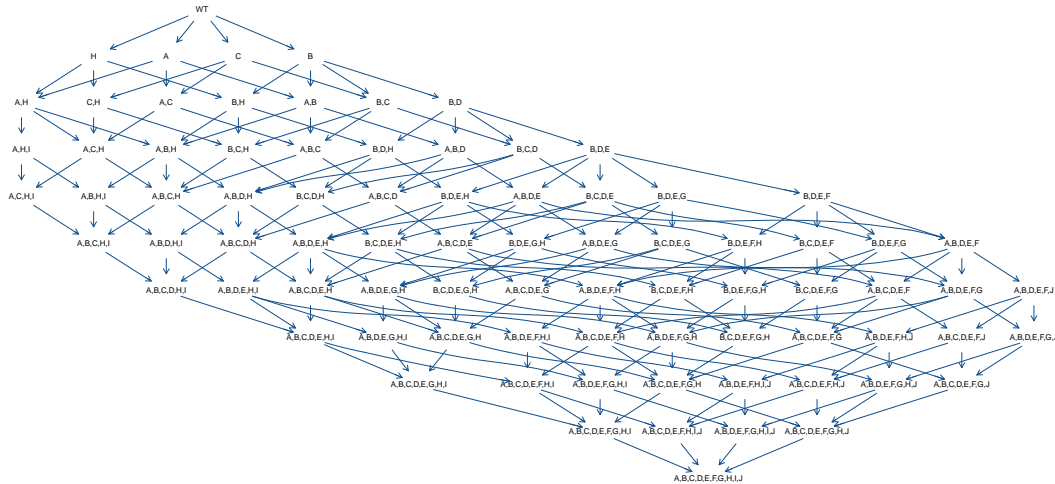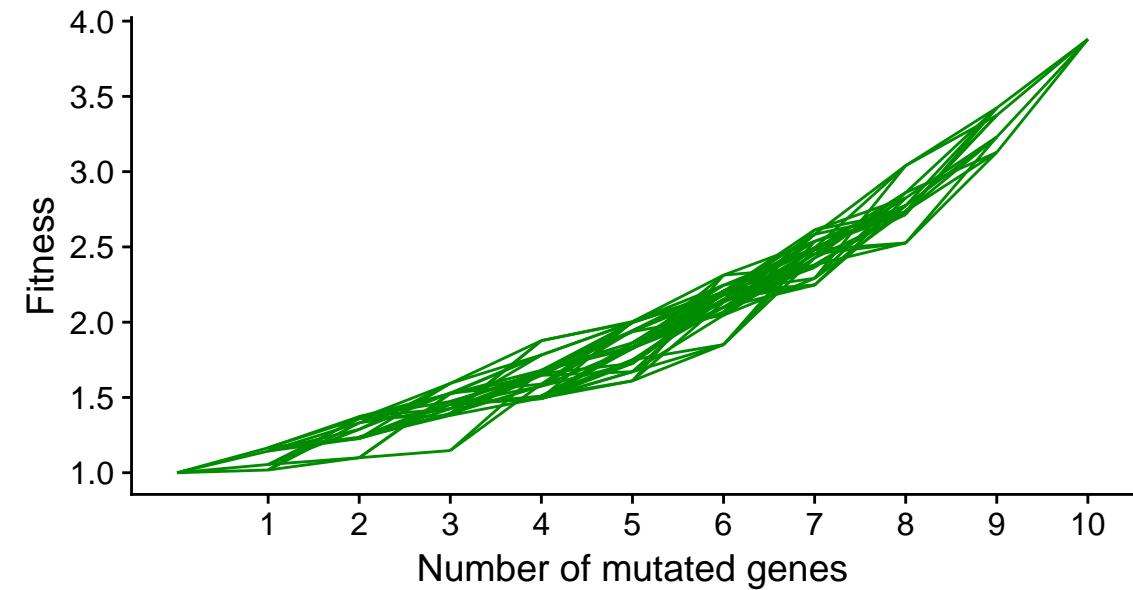

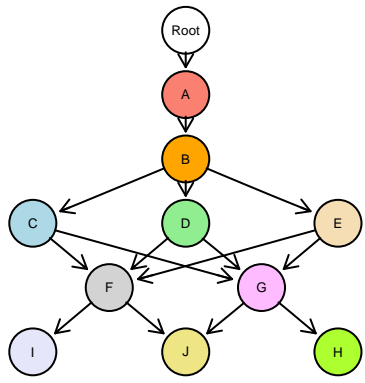

ID **CRSLV974aXfmgnX10**  
 acc genotypes **22**  
 peaks no back **1**  
 removed edges **0**  
 prop rem edges **0**

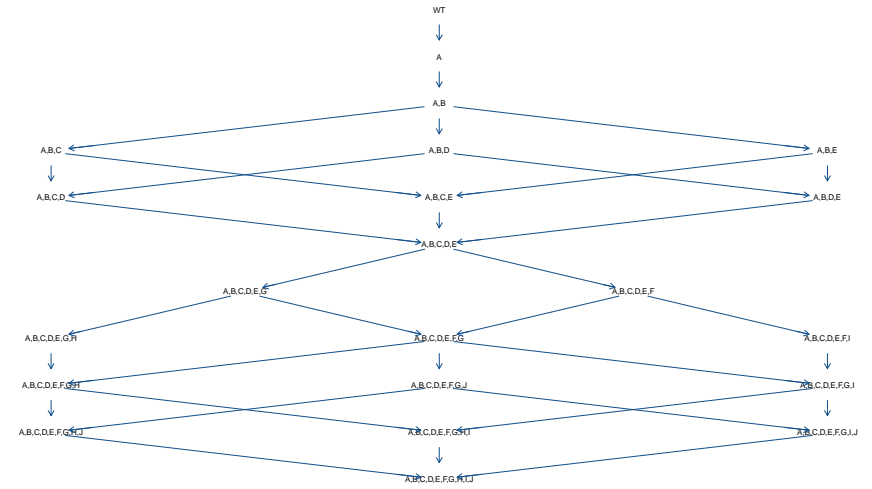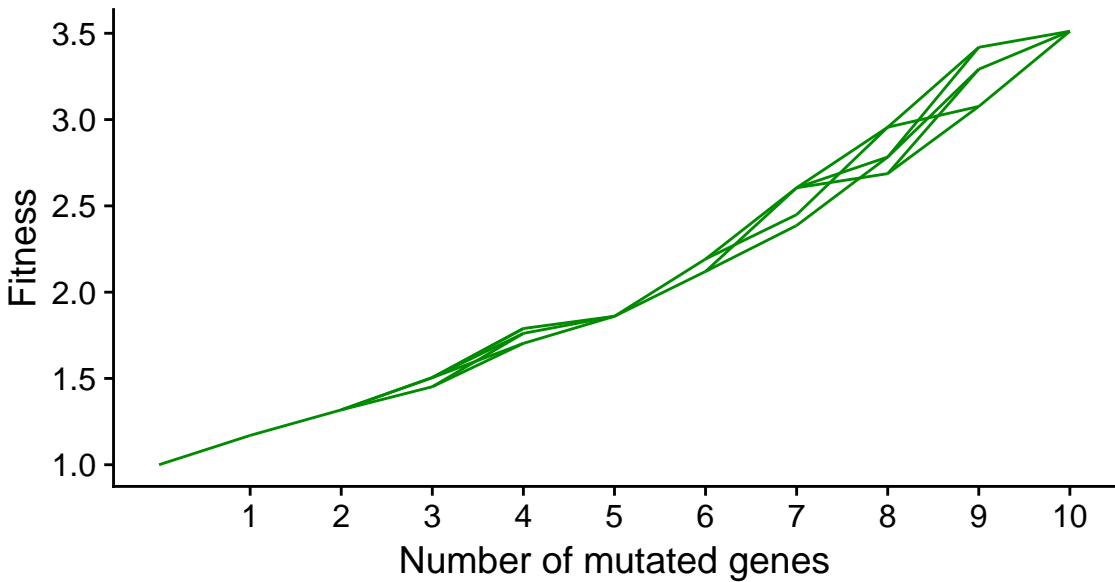

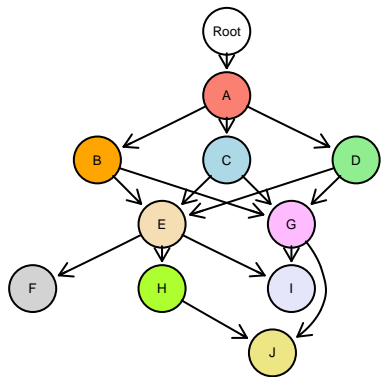

*ID* cWla4xvRzx8wVebz  
*acc genotypes* 26  
*peaks no back* 1  
*removed edges* 0  
*prop rem edges* 0

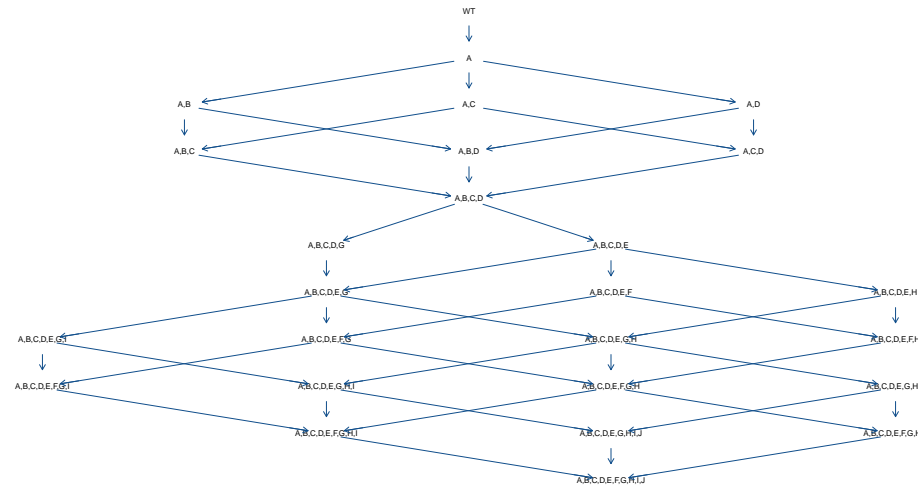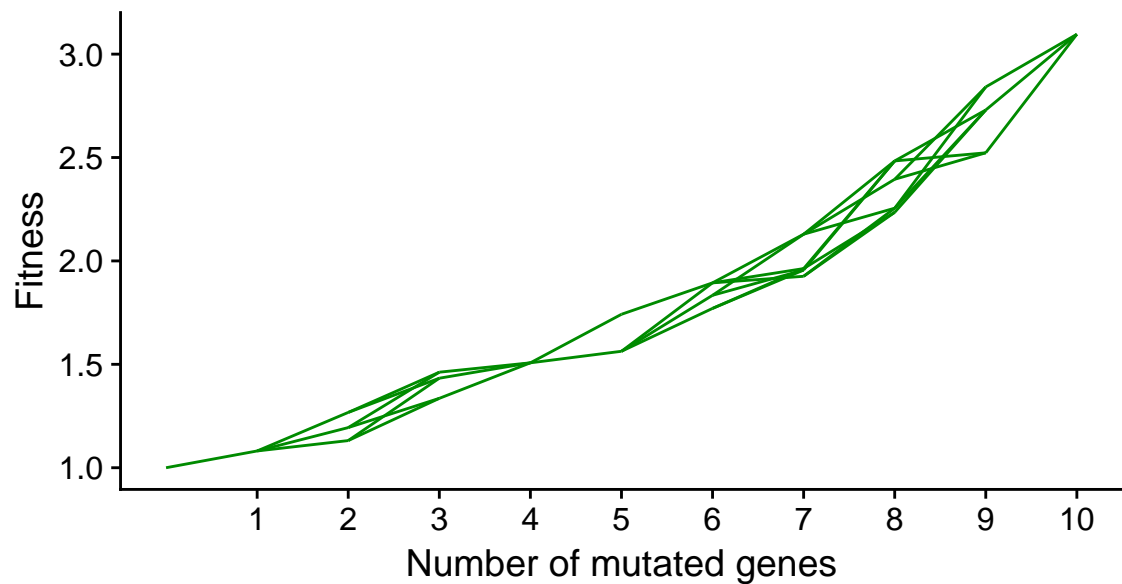

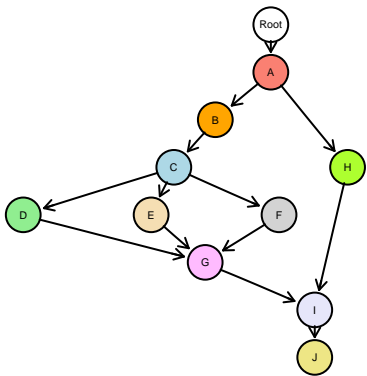

ID **d1i86X4sy10ttNPpW**  
 acc genotypes **25**  
 peaks no back **1**  
 removed edges **0**  
 prop rem edges **0**

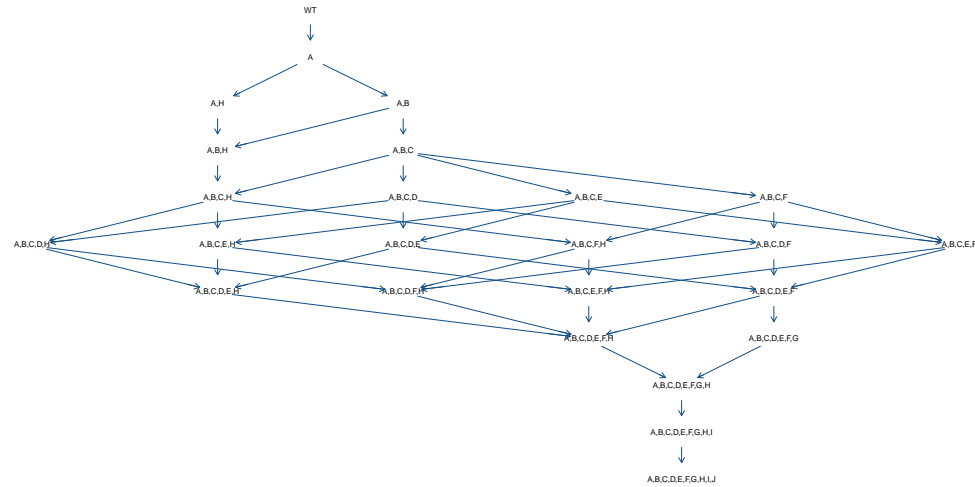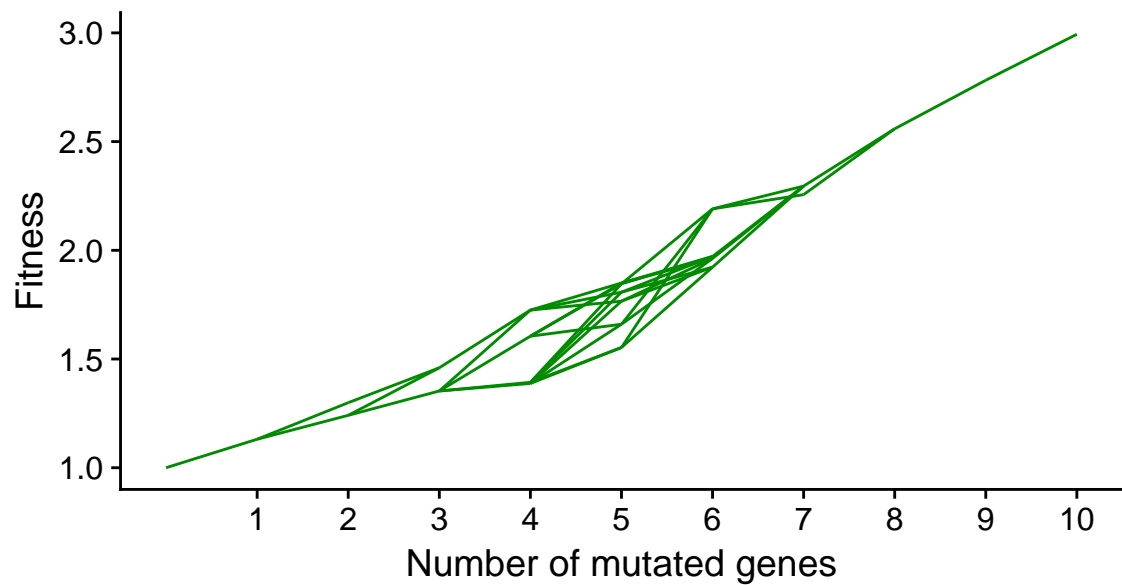



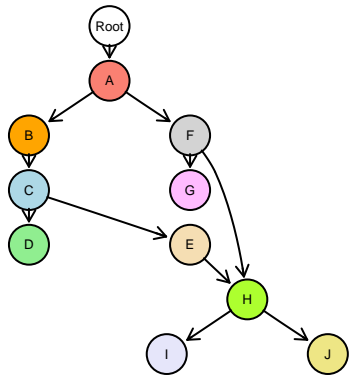

ID **D3yYb2Y5LZW**HMIC9  
 acc genotypes **35**  
 peaks no back 1  
 removed edges 0  
 prop rem edges 0

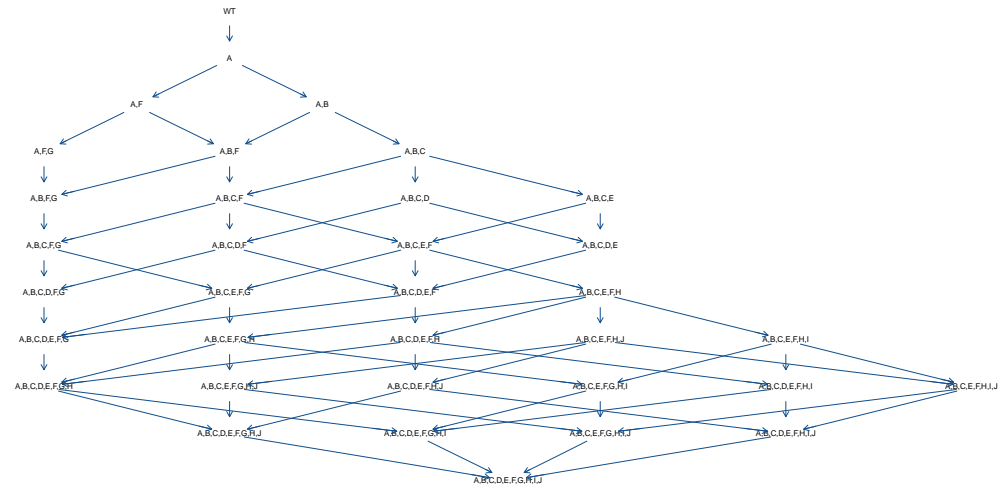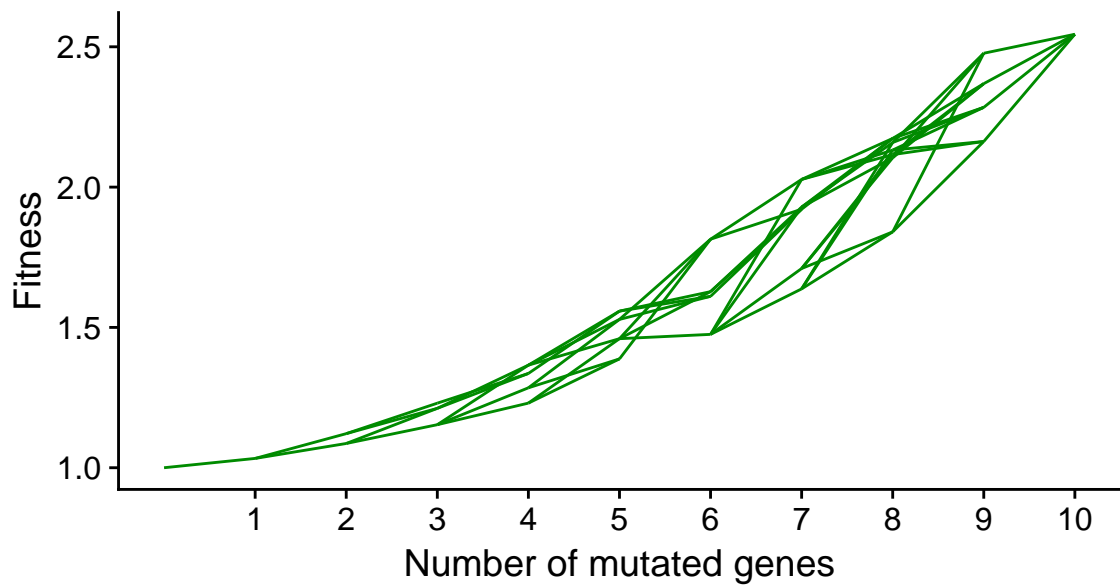

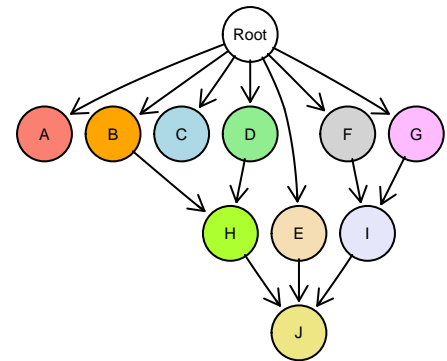

*ID* DishuUtqtuc3gwcU  
*acc genotypes* 204  
*peaks no back* 1  
*removed edges* 0  
*prop rem edges* 0

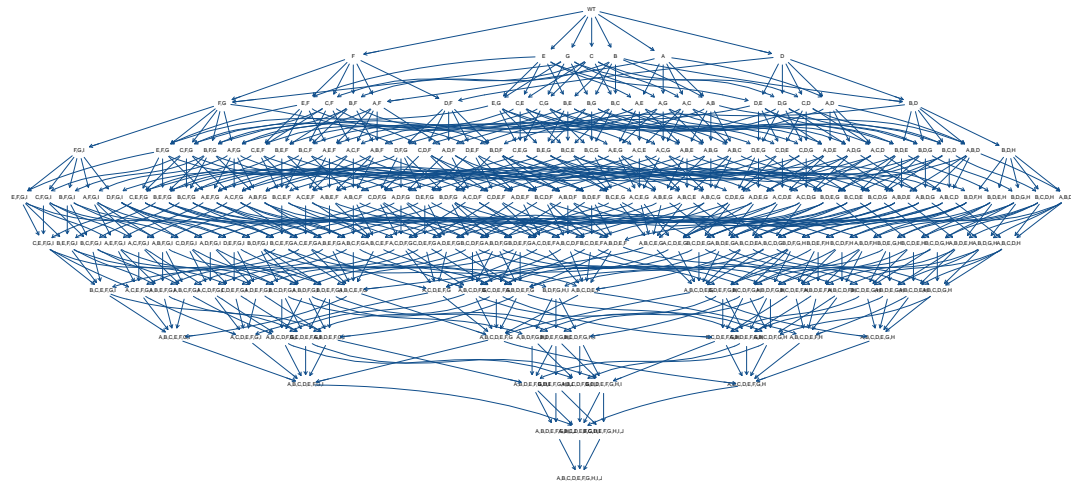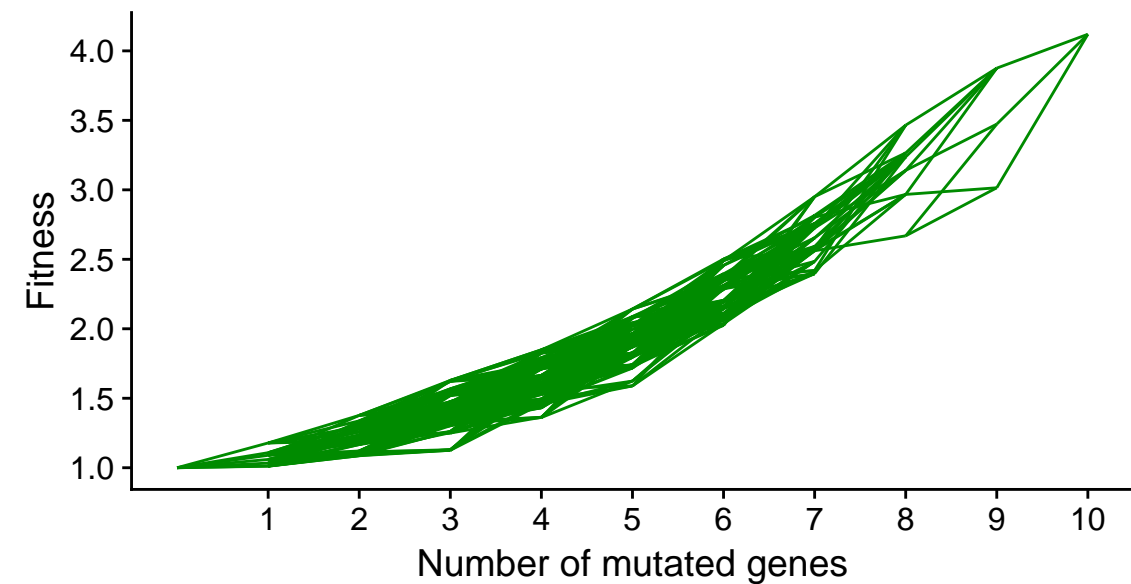

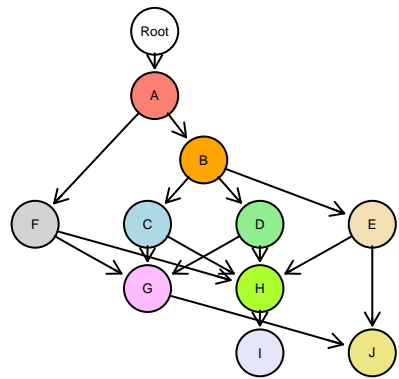

ID DLJ64zEF6RPBgmZU  
 acc genotypes 28  
 peaks no back 1  
 removed edges 0  
 prop rem edges 0

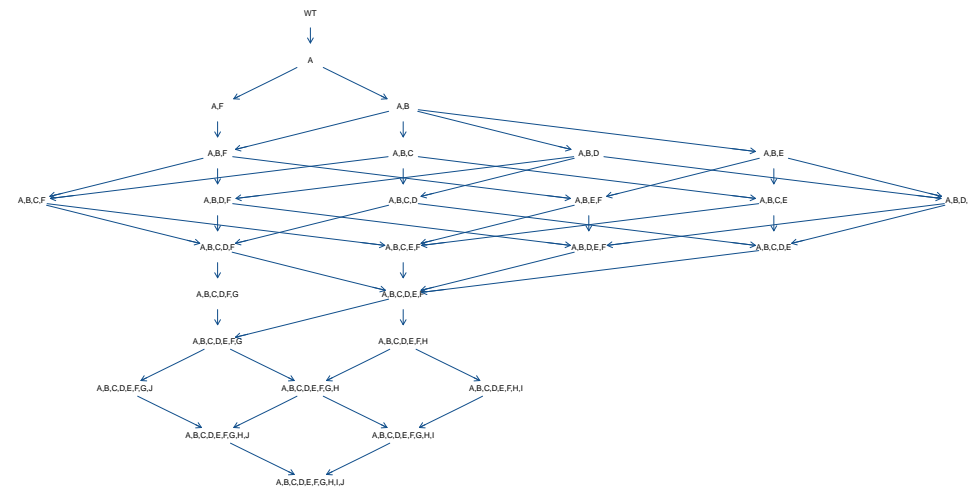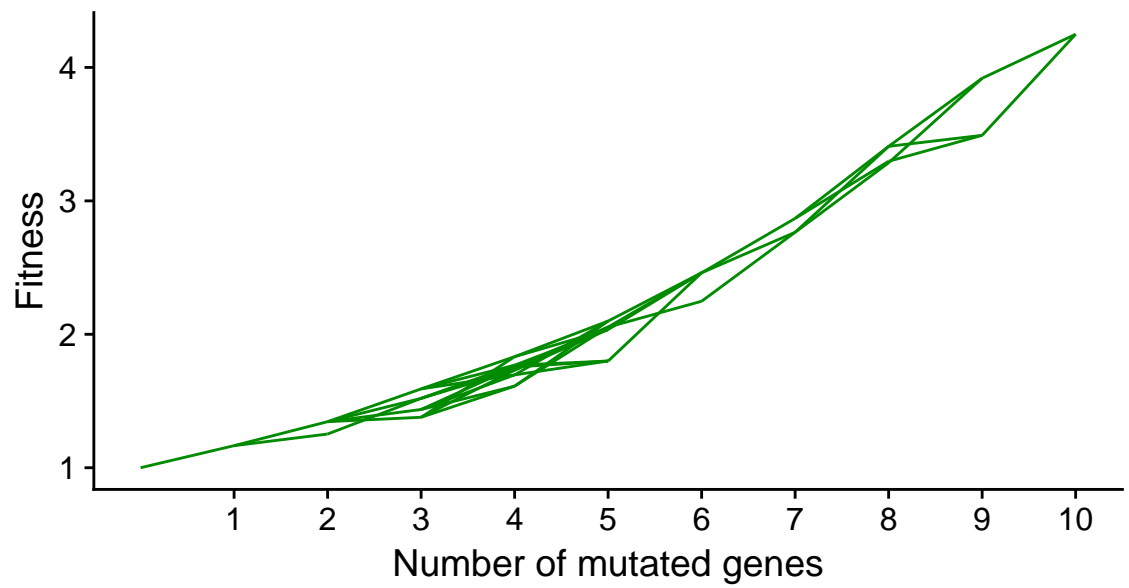

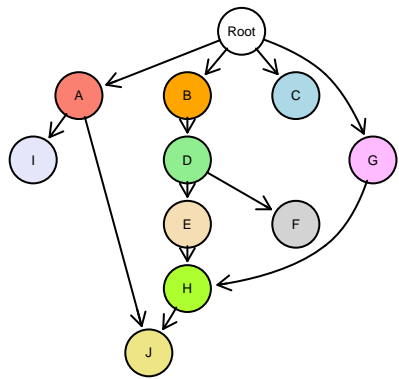

ID dvBzM4I8nentNLyl  
 acc genotypes 92  
 peaks no back 1  
 removed edges 0  
 prop rem edges 0

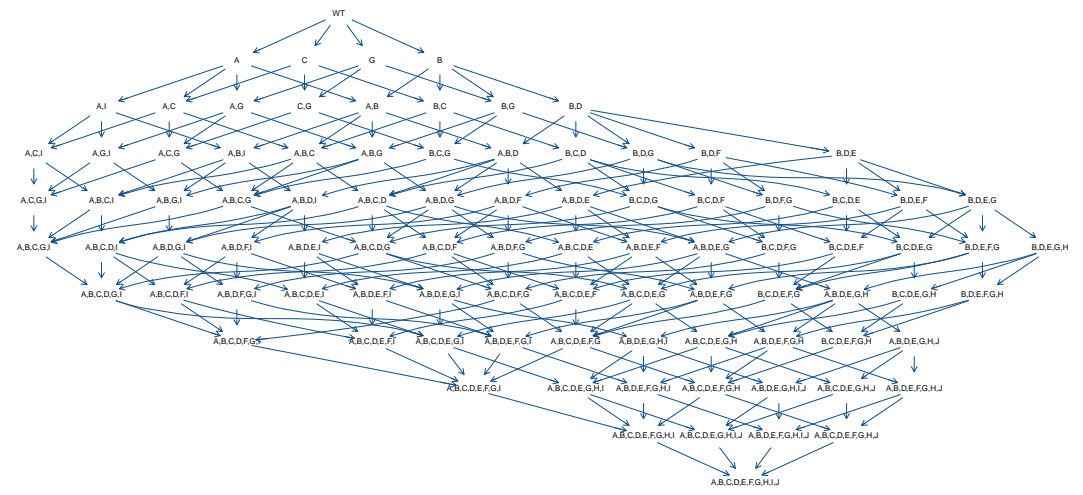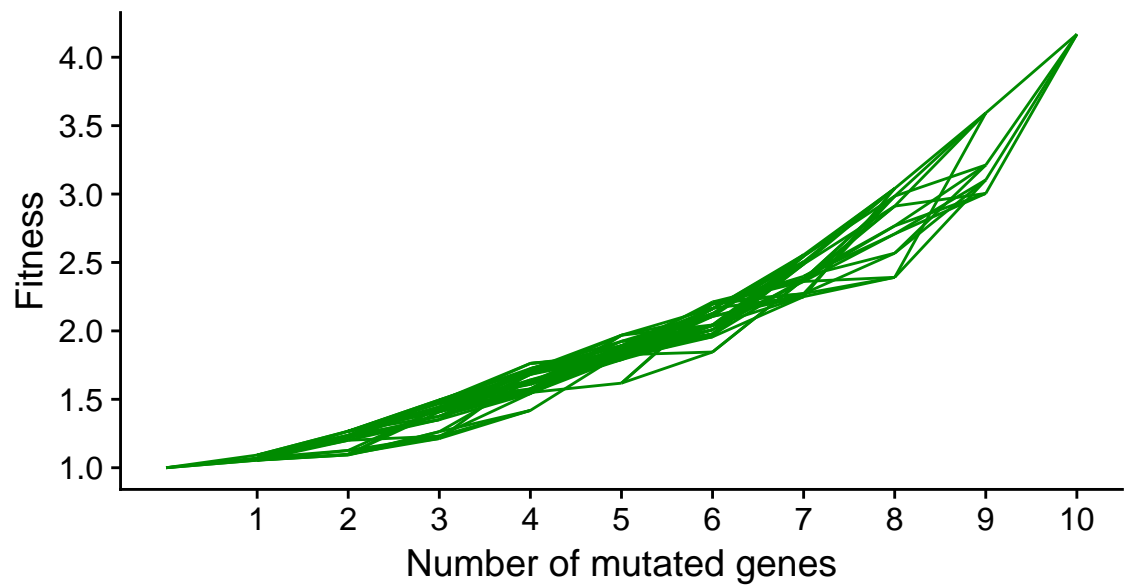

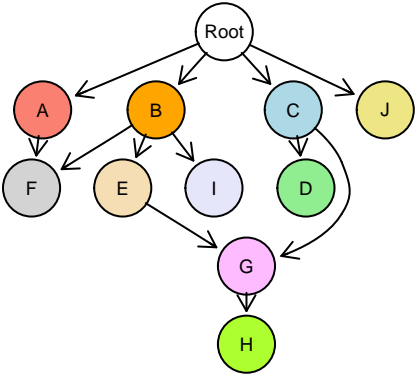

ID dvQzUhETIIIrU97u  
 acc genotypes 132  
 peaks no back 1  
 removed edges 0  
 prop rem edges 0

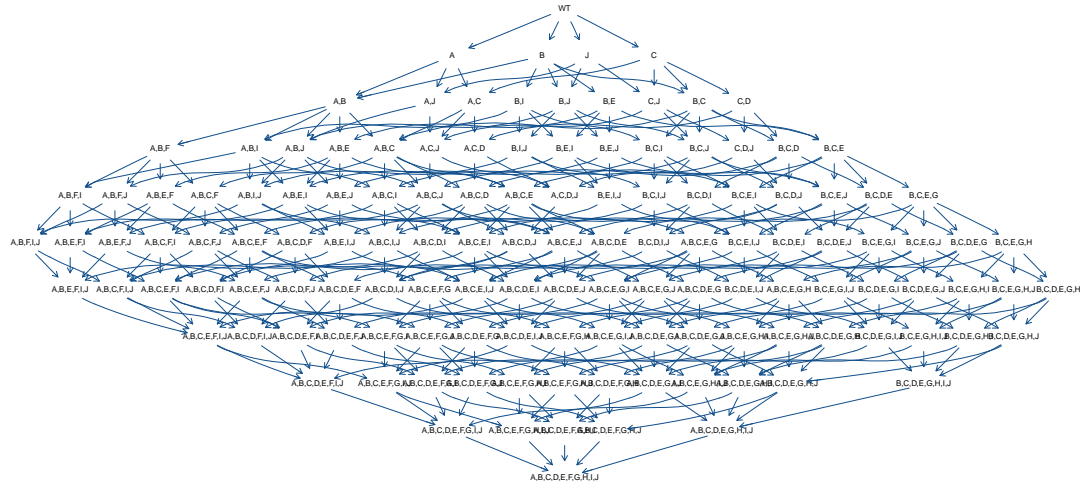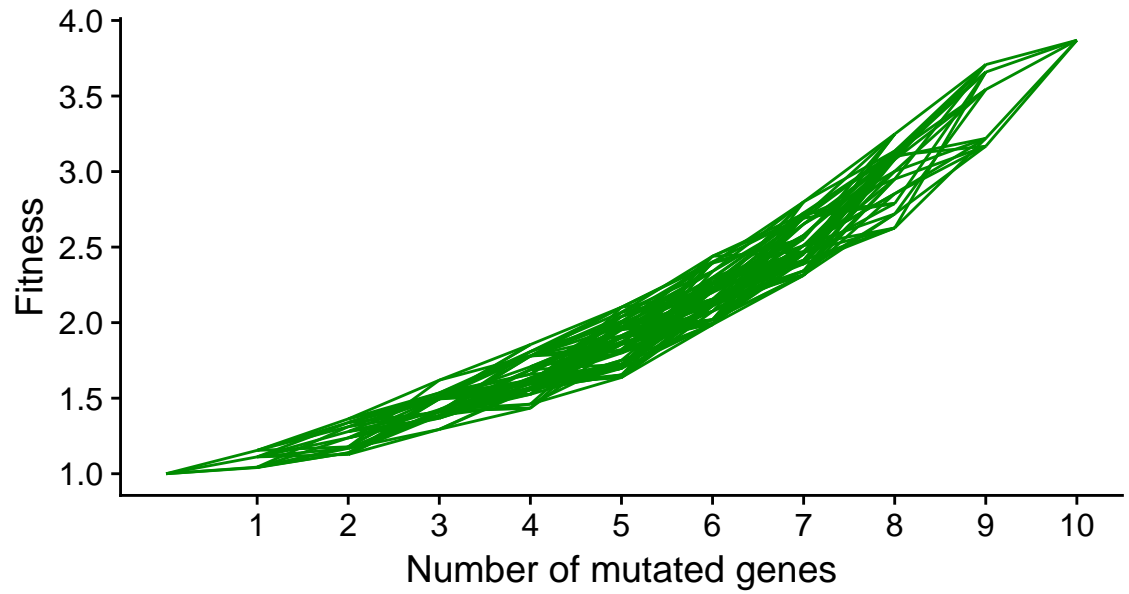

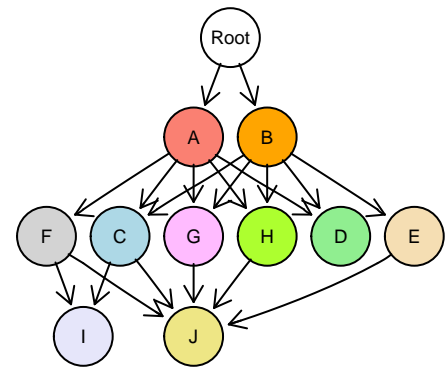

ID EBt810tAfY9D105FkY  
 acc genotypes 89  
 peaks no back 1  
 removed edges 0  
 prop rem edges 0

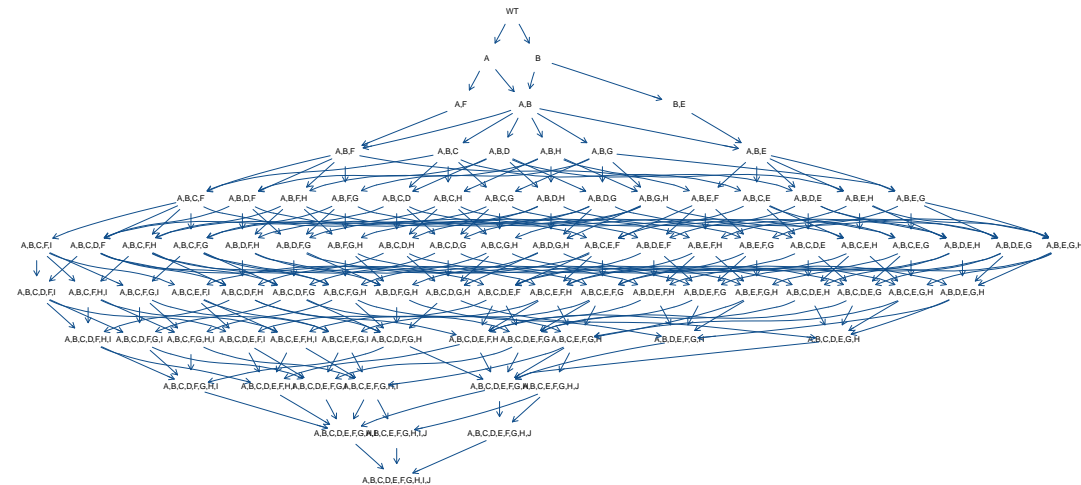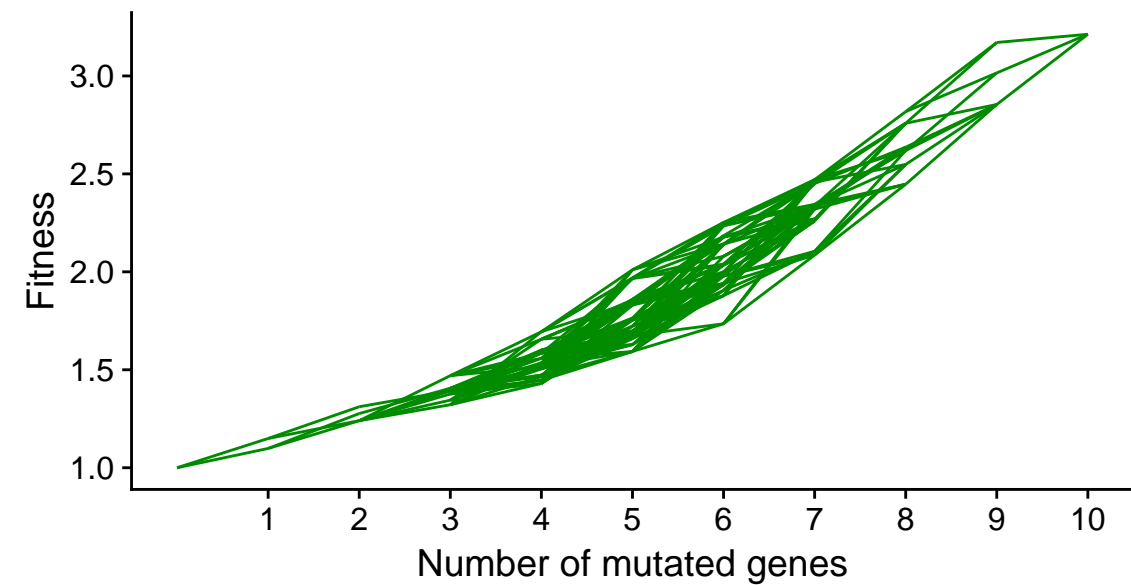

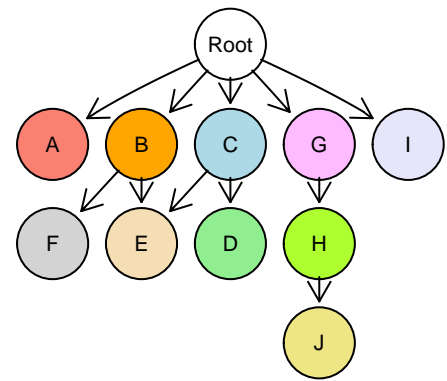

*ID* ekTHm442hqA10IVJm  
*acc genotypes* 208  
*peaks no back* 1  
*removed edges* 0  
*prop rem edges* 0

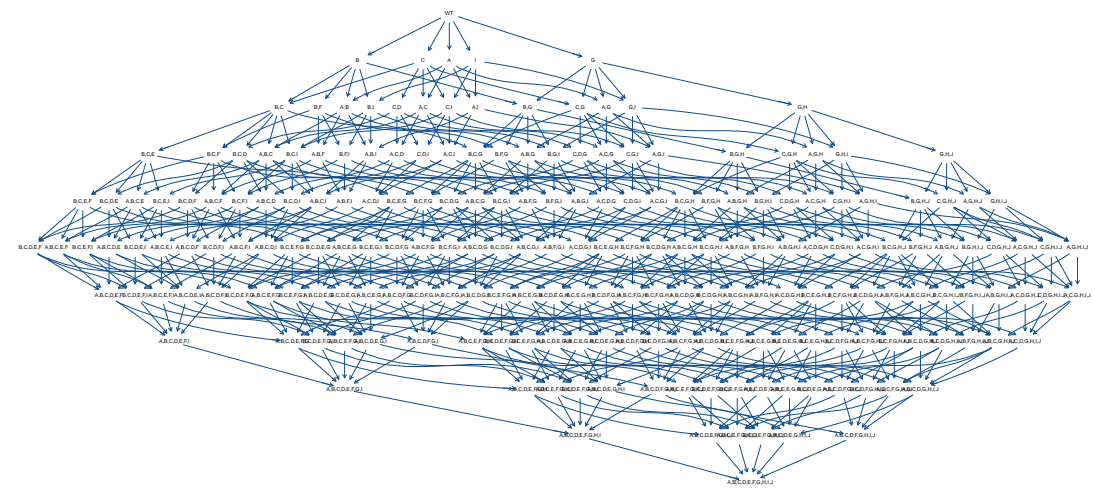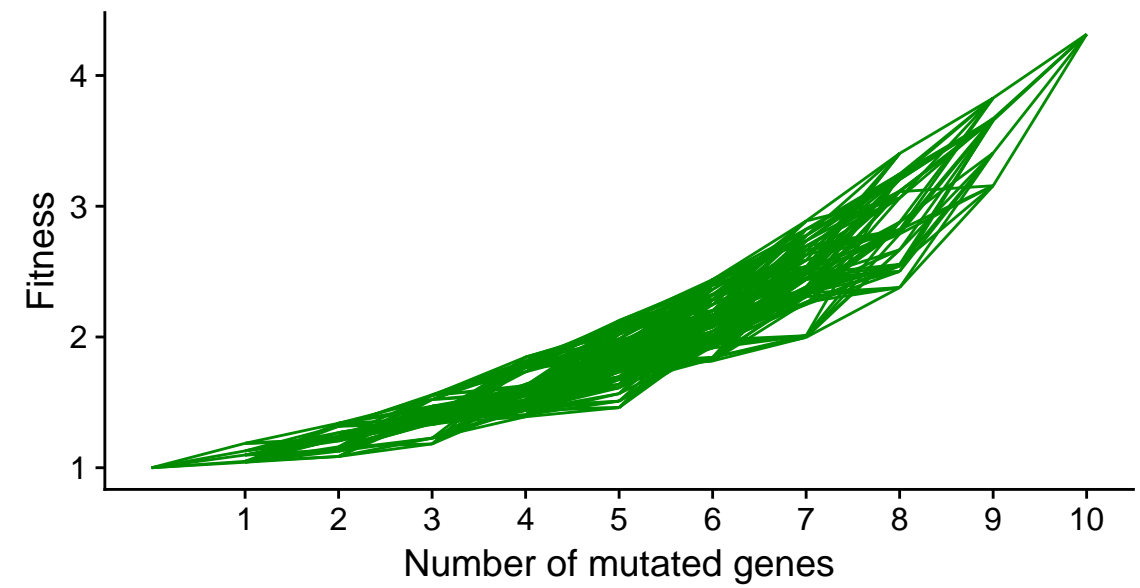

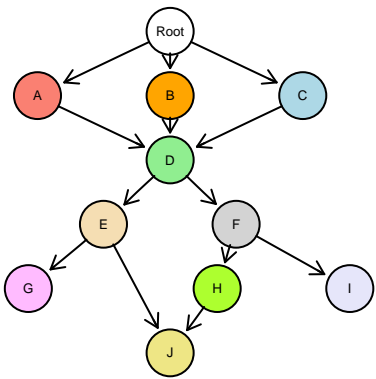

ID **EkuM7k8AJLiPR6hS**  
 acc genotypes **27**  
 peaks no back 1  
 removed edges 0  
 prop rem edges 0

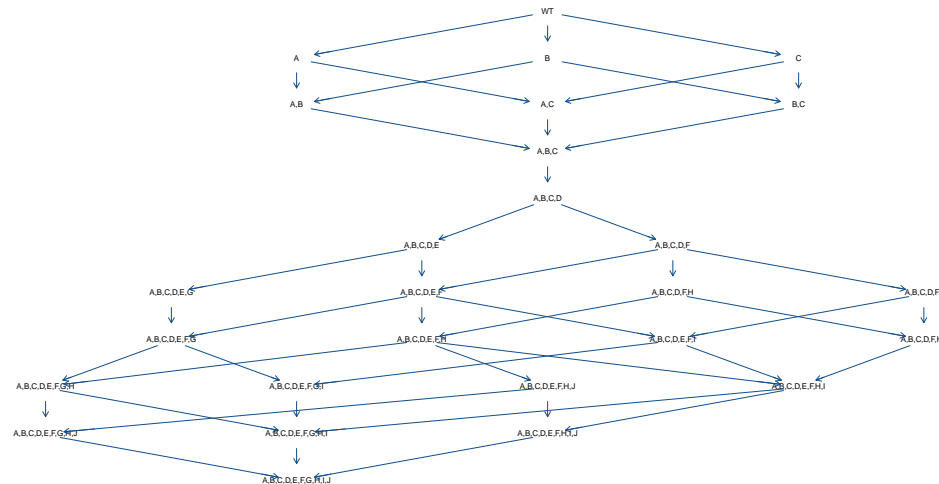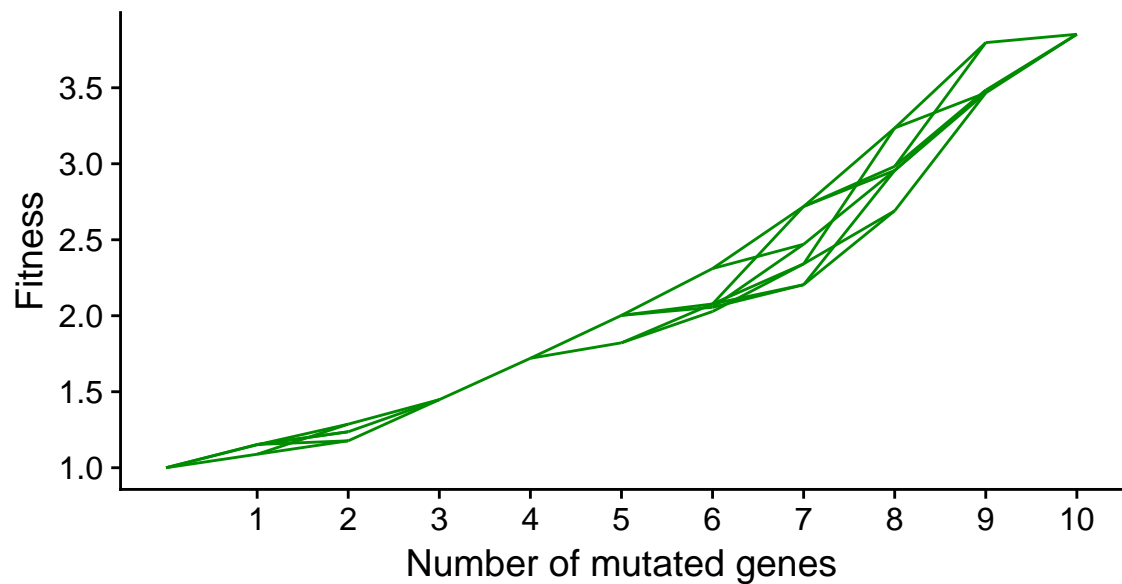



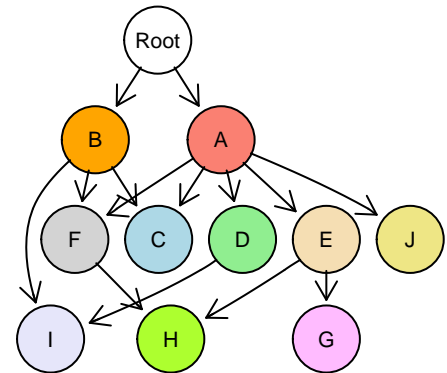

ID eNPbGhByo2yD8VoG  
 acc genotypes 110  
 peaks no back 1  
 removed edges 0  
 prop rem edges 0

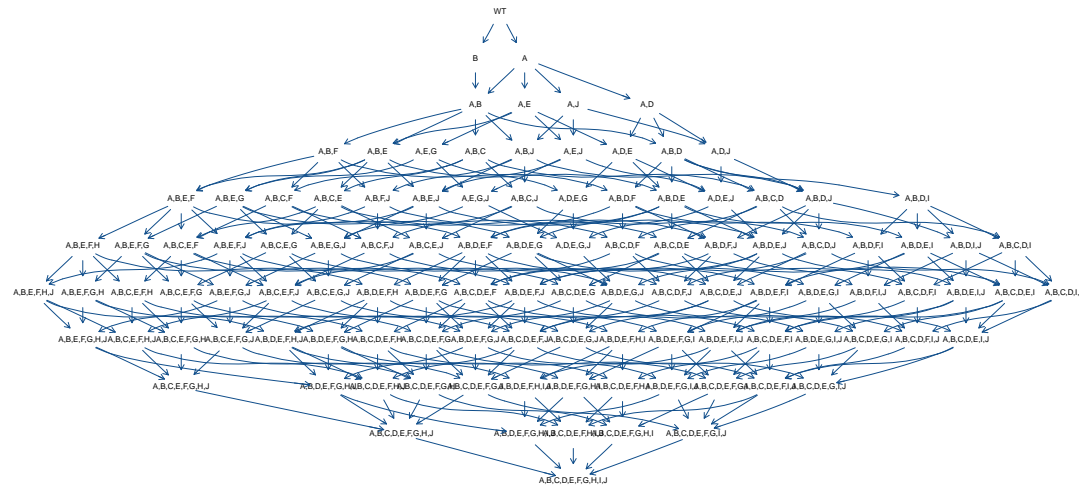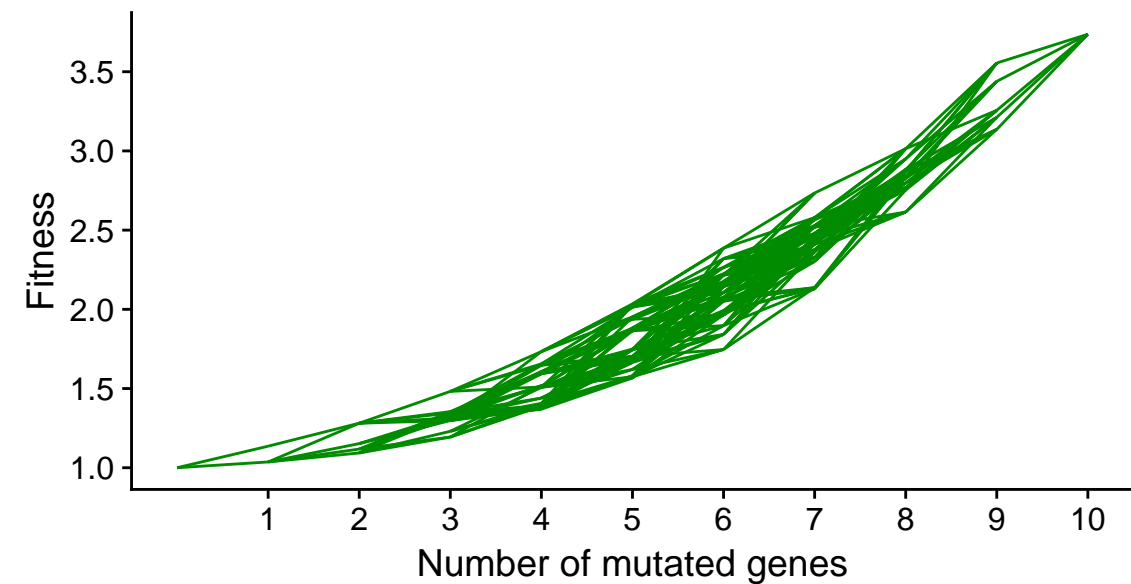

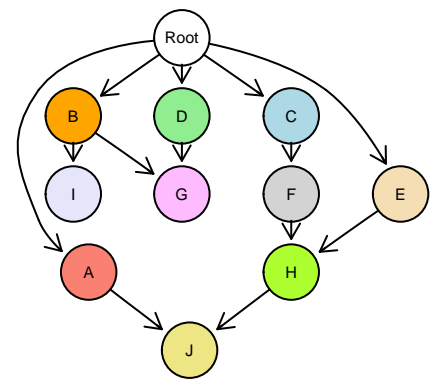

*ID* EoCzYRJurCmFz168  
*acc genotypes* 120  
*peaks no back* 1  
*removed edges* 0  
*prop rem edges* 0

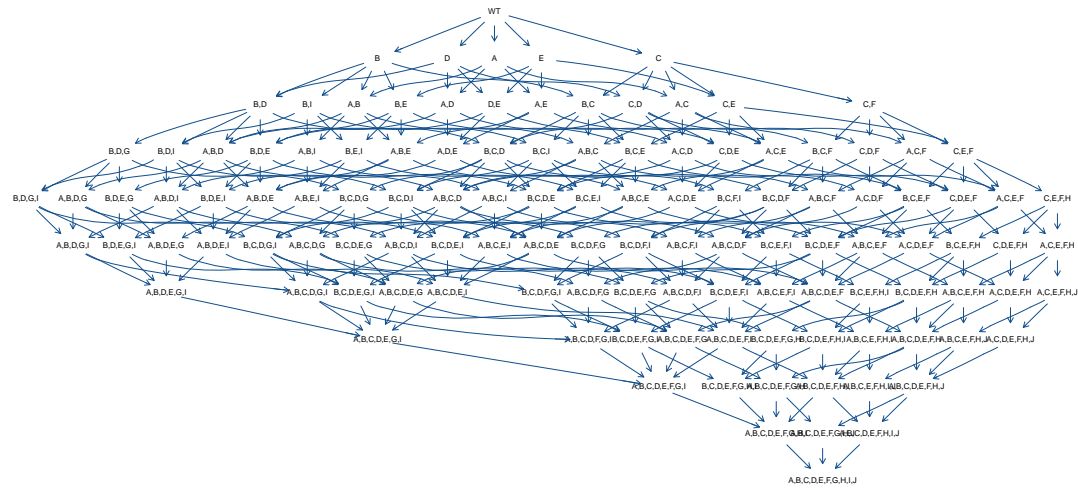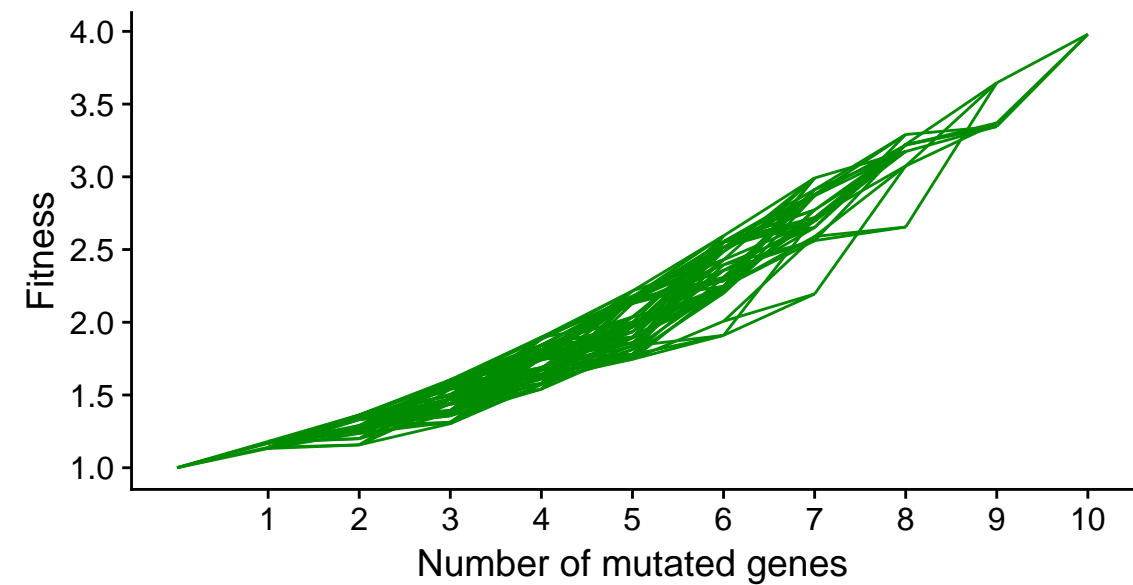

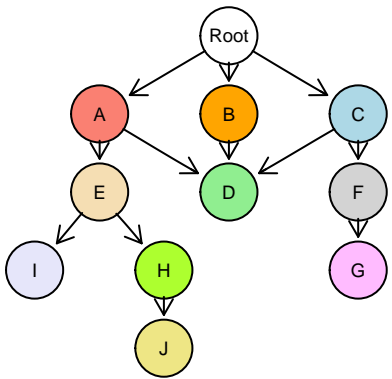

ID **eOGzHUxNXJg7737x**  
 acc genotypes **85**  
 peaks no back **1**  
 removed edges **0**  
 prop rem edges **0**

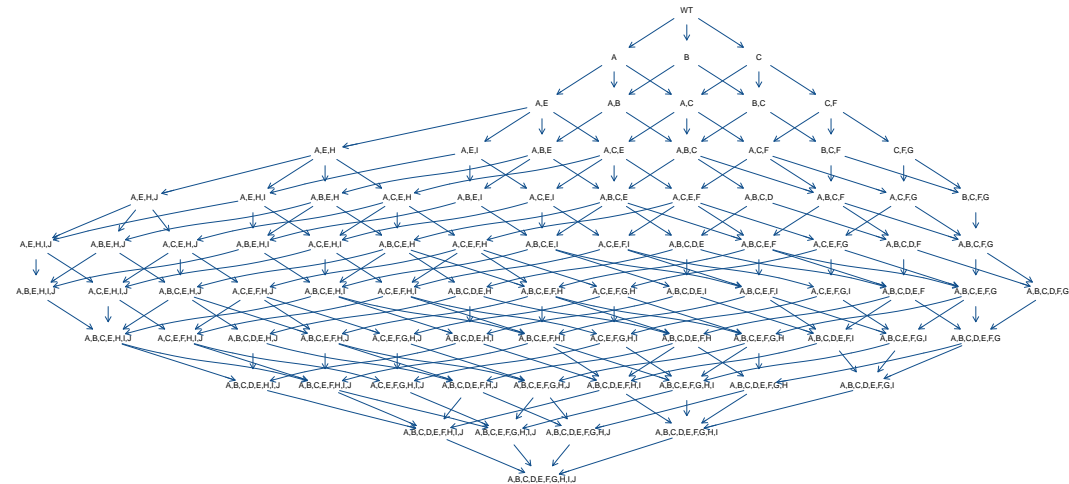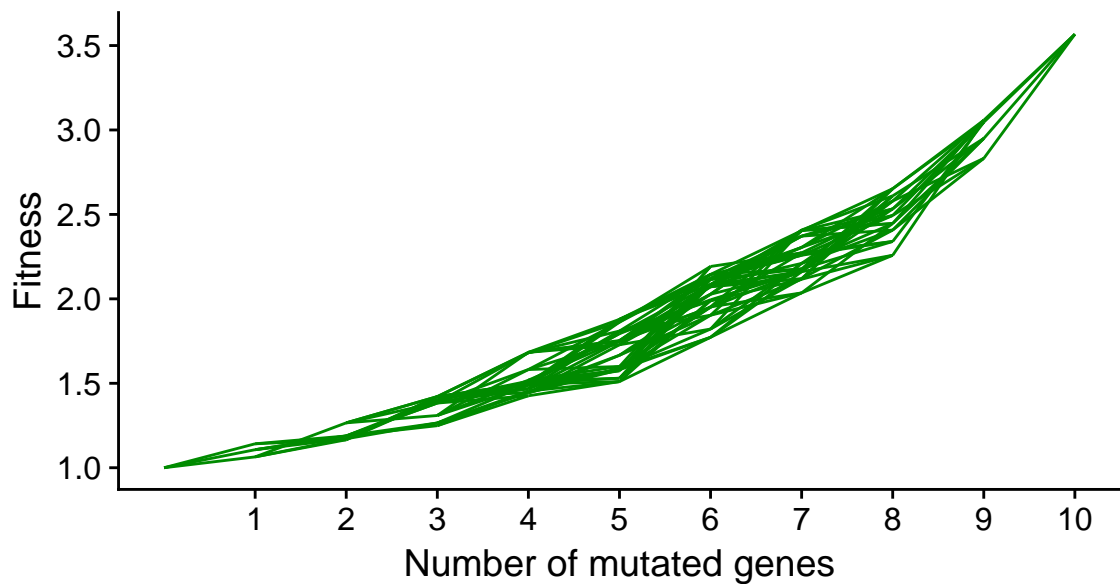

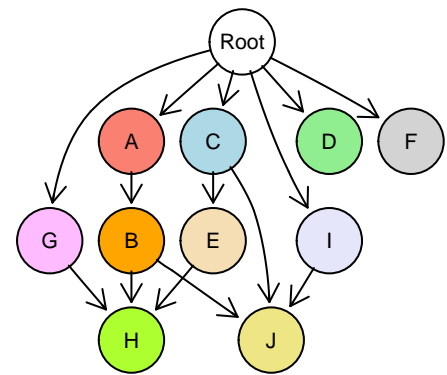

ID **EScCMp2k63ciS5e1**  
 acc genotypes **172**  
 peaks no back 1  
 removed edges 0  
 prop rem edges 0

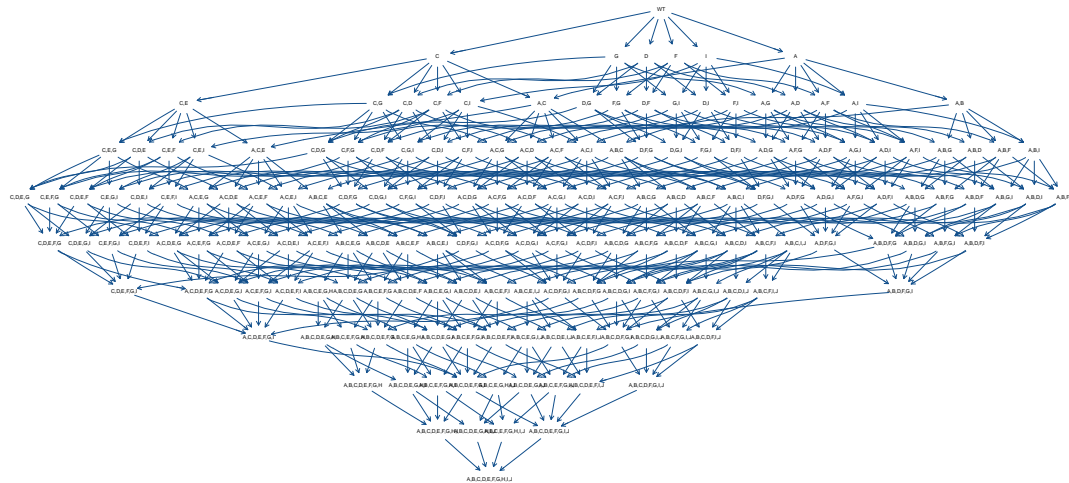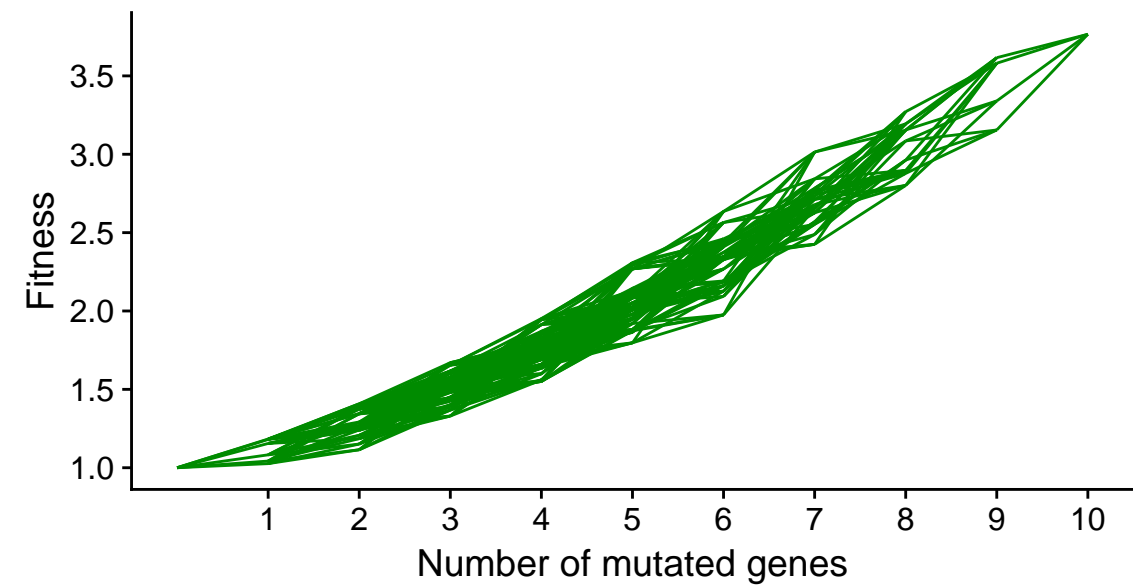

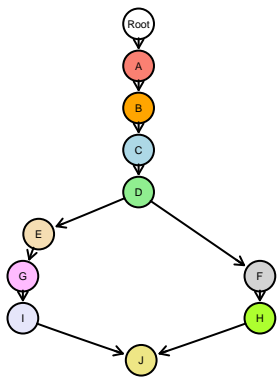

*ID* EU10dl8bbHyhh4nE  
*acc genotypes* 17  
*peaks no back* 1  
*removed edges* 0  
*prop rem edges* 0

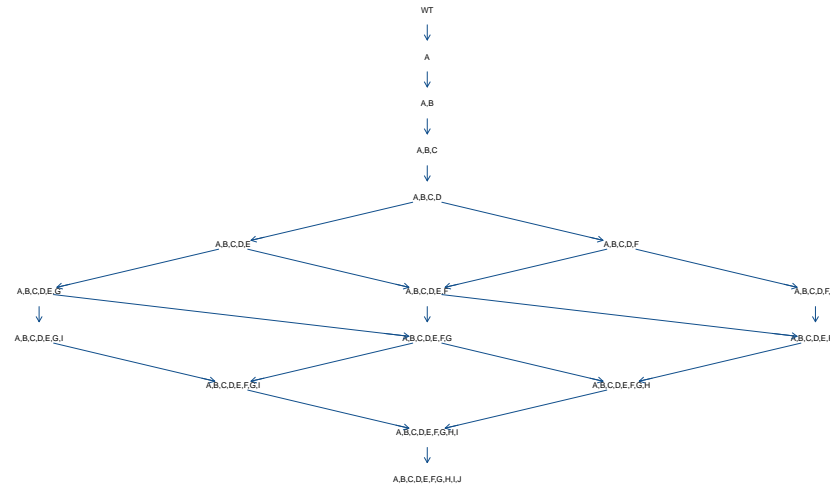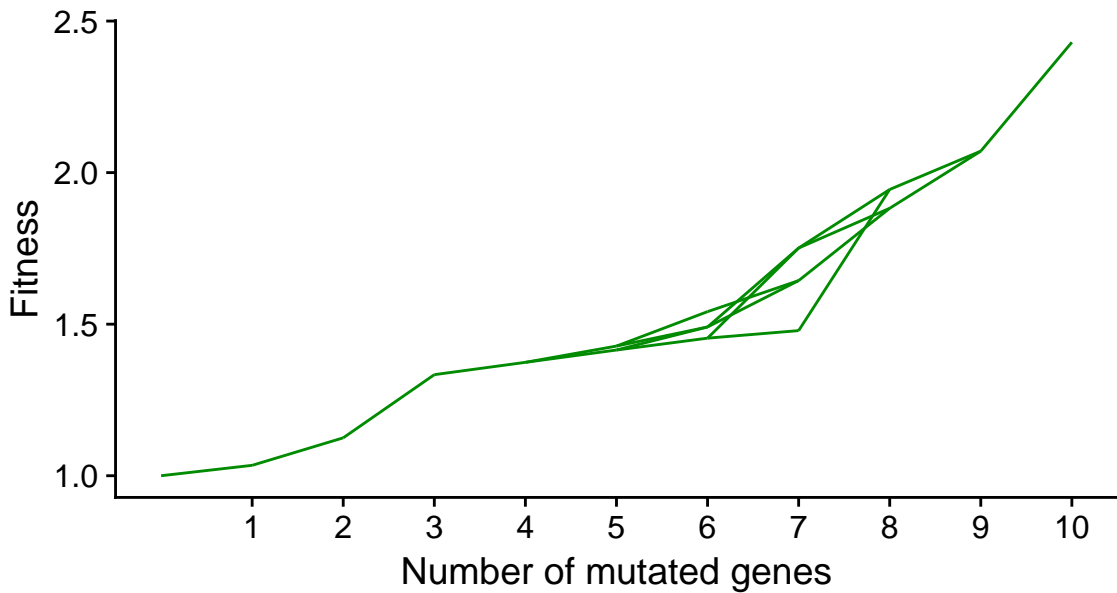

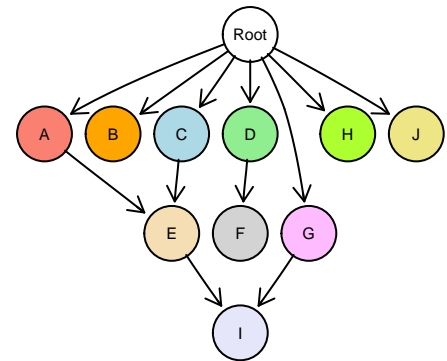

*ID* ExaZNcadWsiZp1os  
*acc genotypes* 264  
*peaks no back* 1  
*removed edges* 0  
*prop rem edges* 0

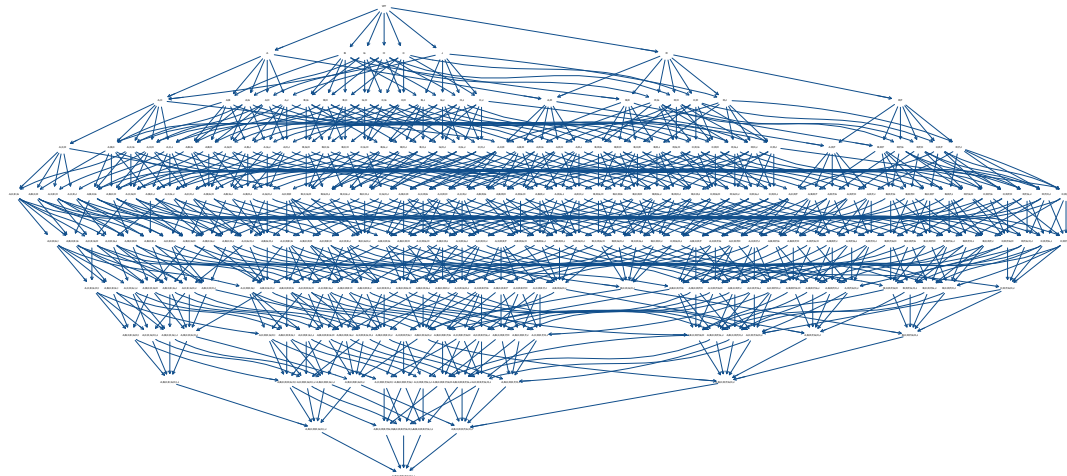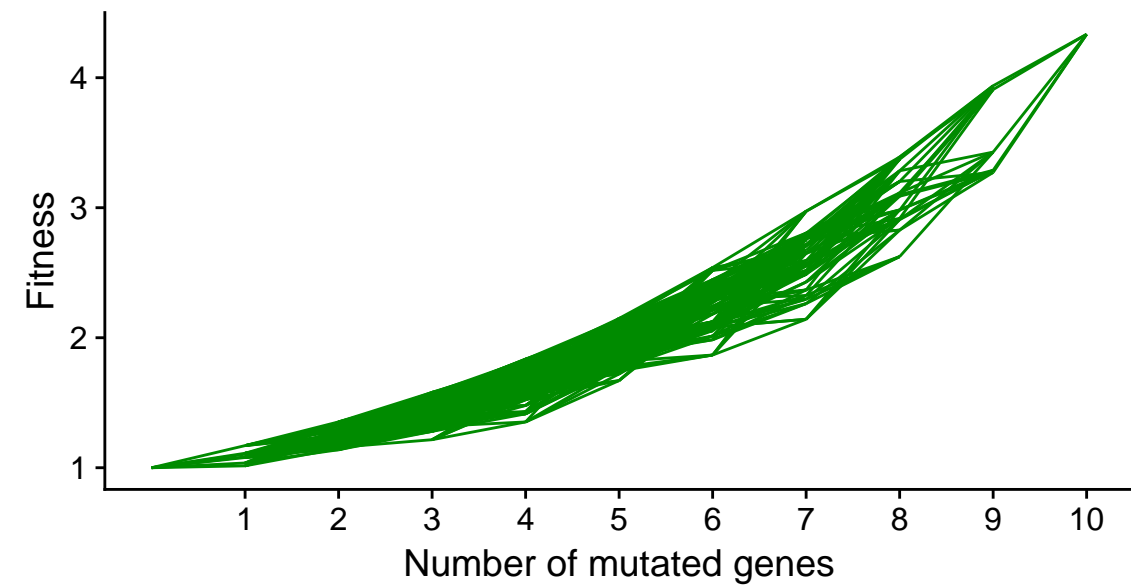

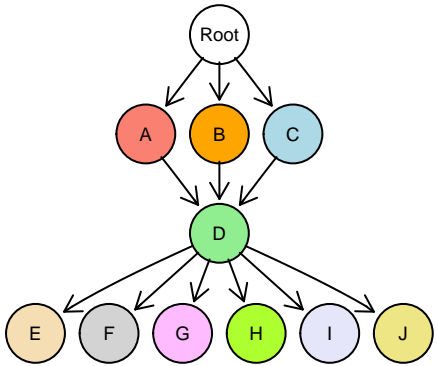

ID **F74OrUIE2JUNgUI10**  
 acc genotypes **72**  
 peaks no back 1  
 removed edges 0  
 prop rem edges 0

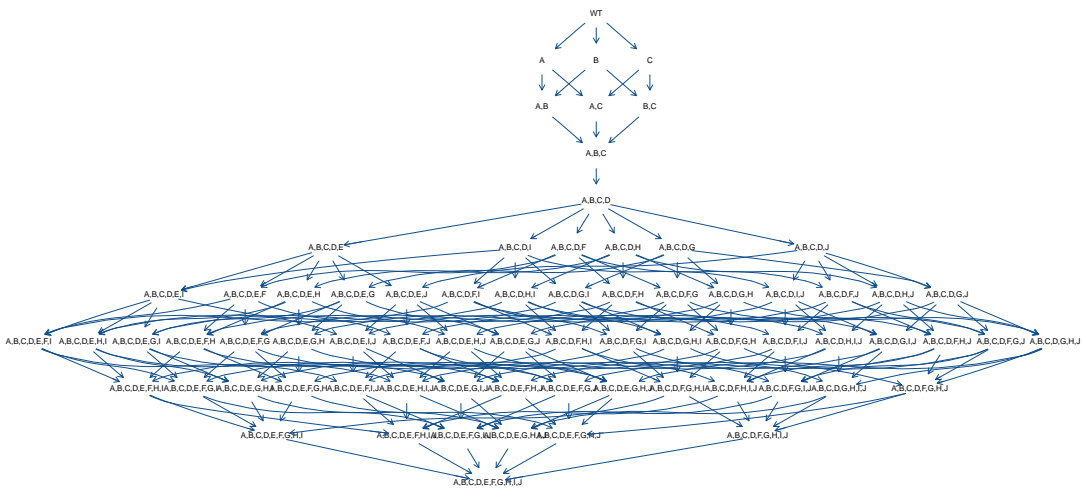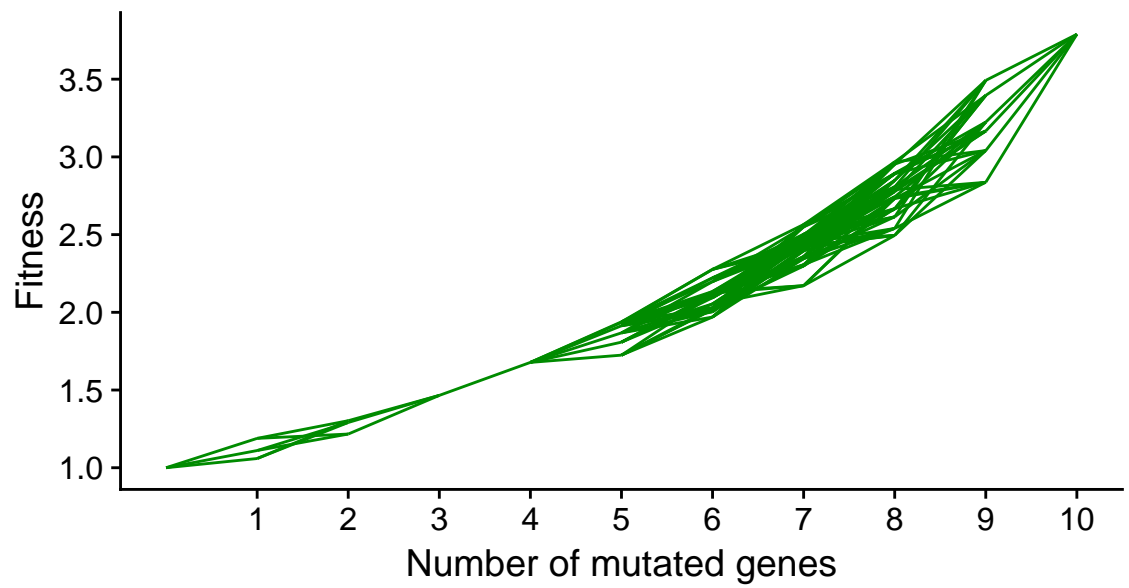

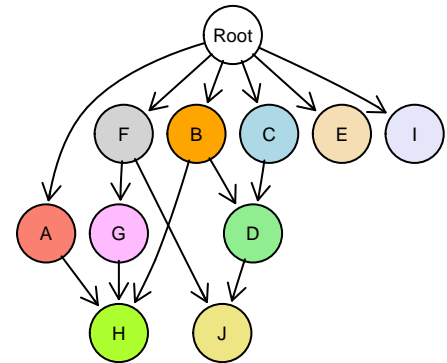

*ID* fDVyfwz5EixVTGkl  
*acc genotypes* 152  
*peaks no back* 1  
*removed edges* 0  
*prop rem edges* 0

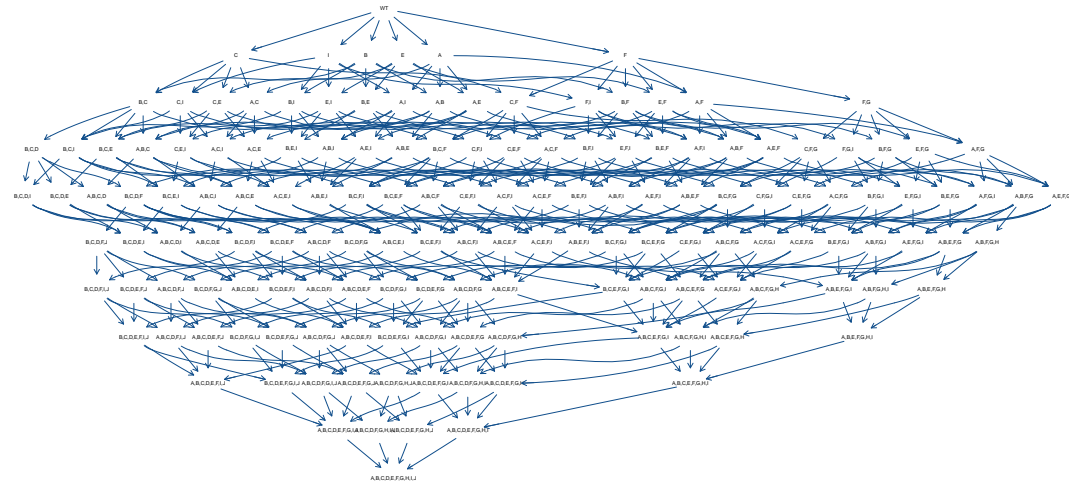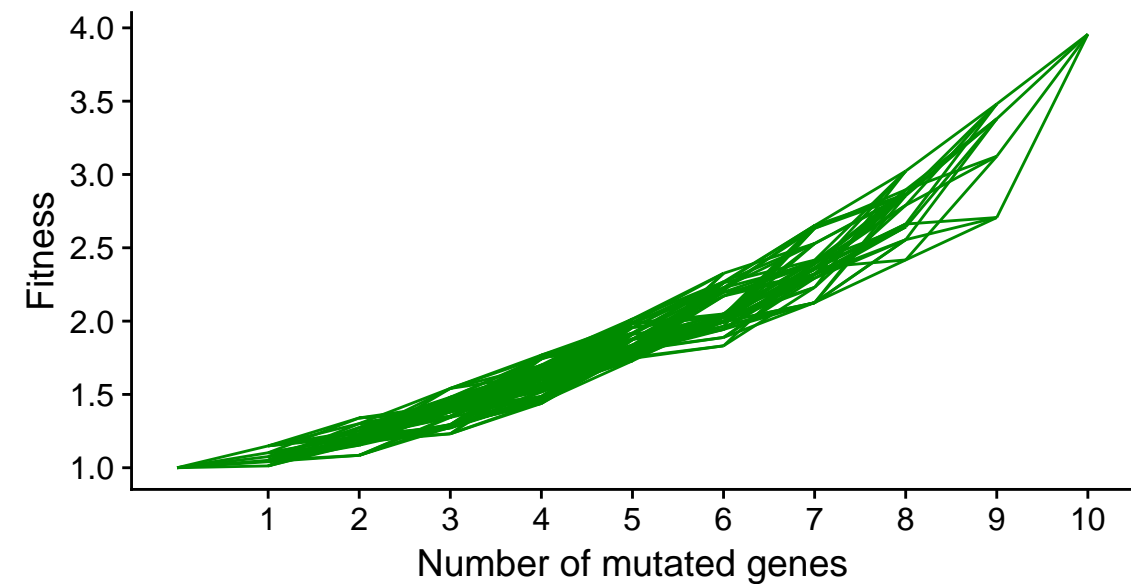



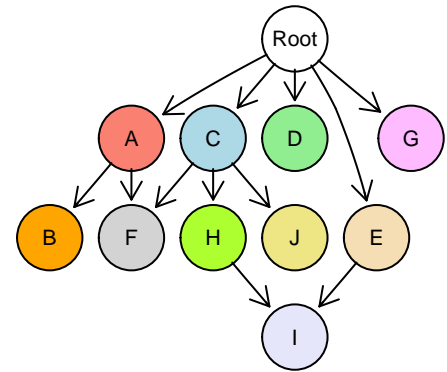

*ID* FMa3on8bA8mNavrZ  
*acc genotypes* 224  
*peaks no back* 1  
*removed edges* 0  
*prop rem edges* 0

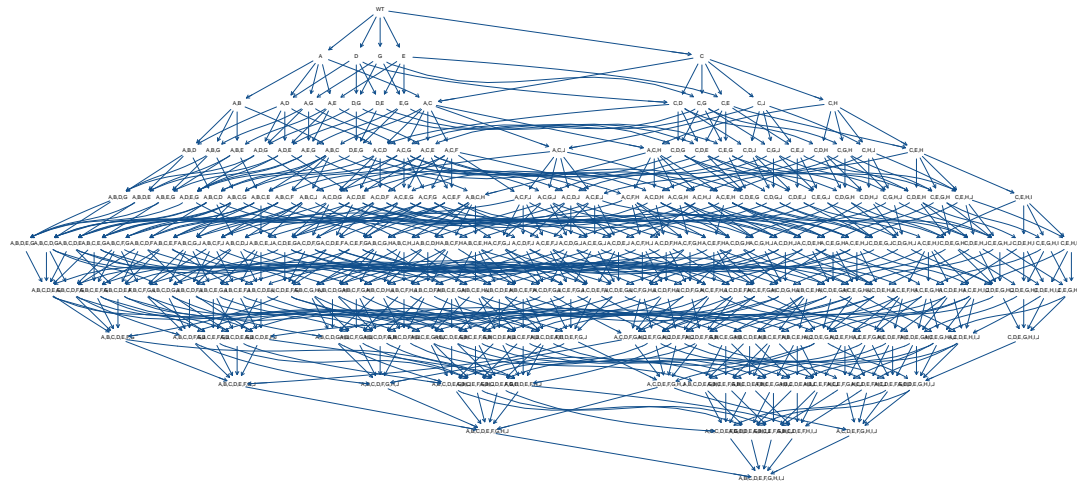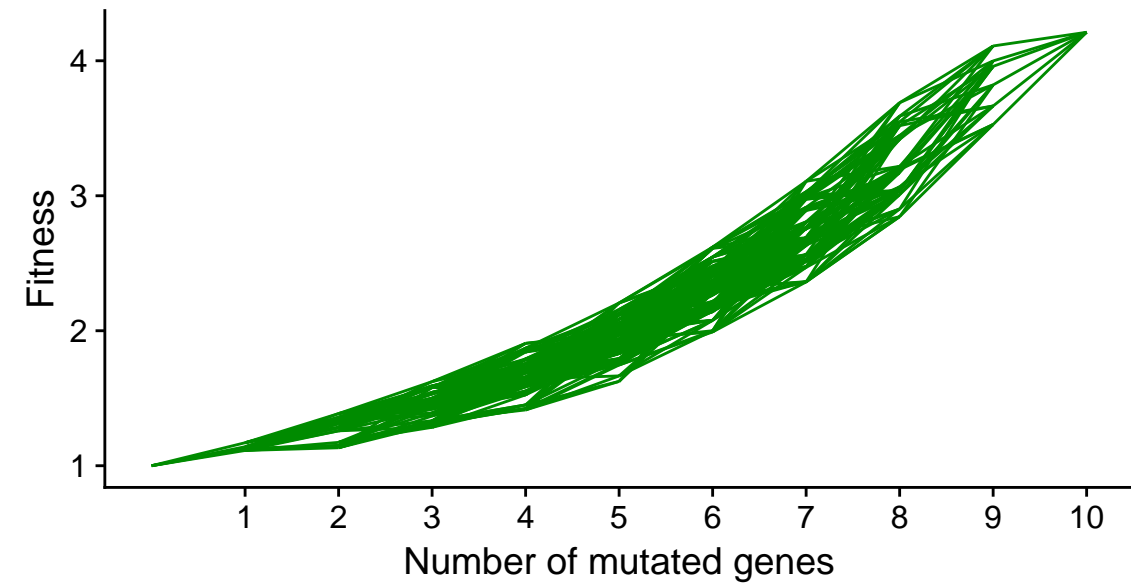

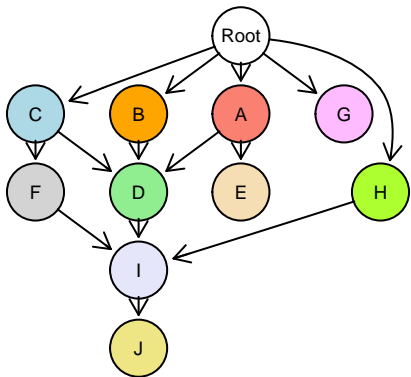

ID **Fsqw1LKsGEExuVa**  
 acc genotypes **96**  
 peaks no back **1**  
 removed edges **0**  
 prop rem edges **0**

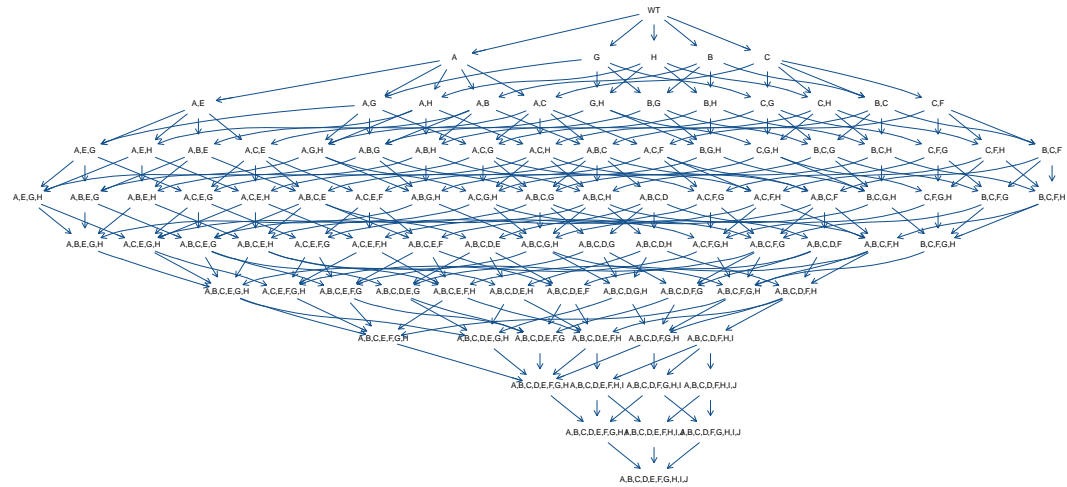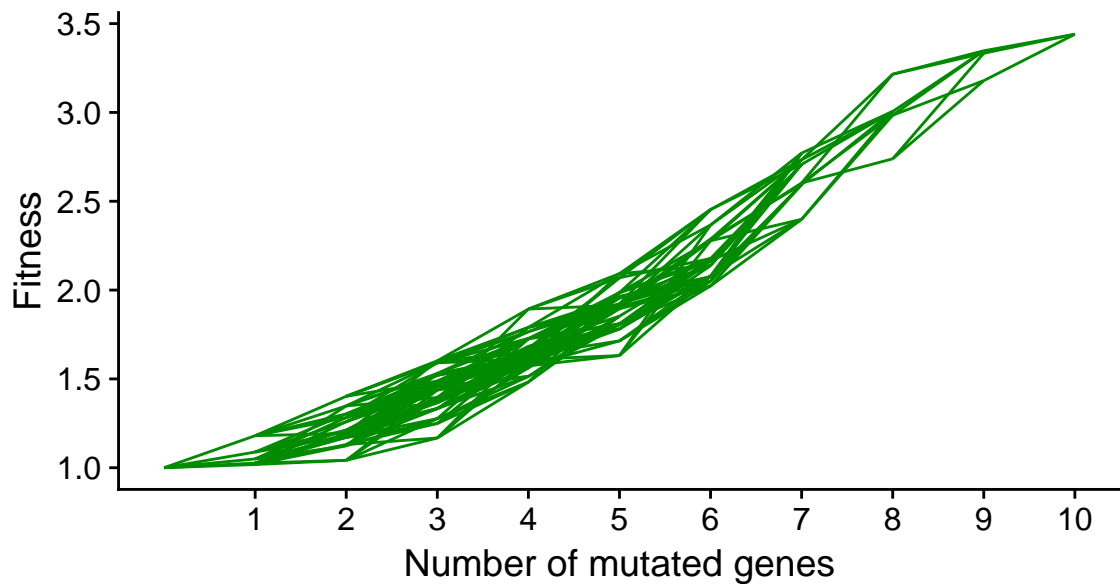

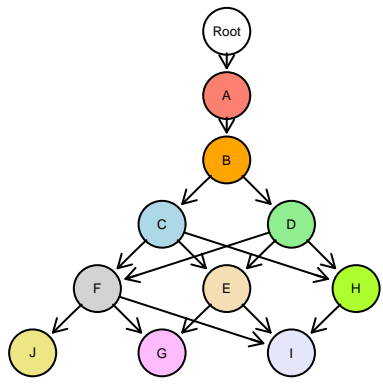

ID **FYcNi4WyweZ3YLZu**  
 acc genotypes **25**  
 peaks no back **1**  
 removed edges **0**  
 prop rem edges **0**

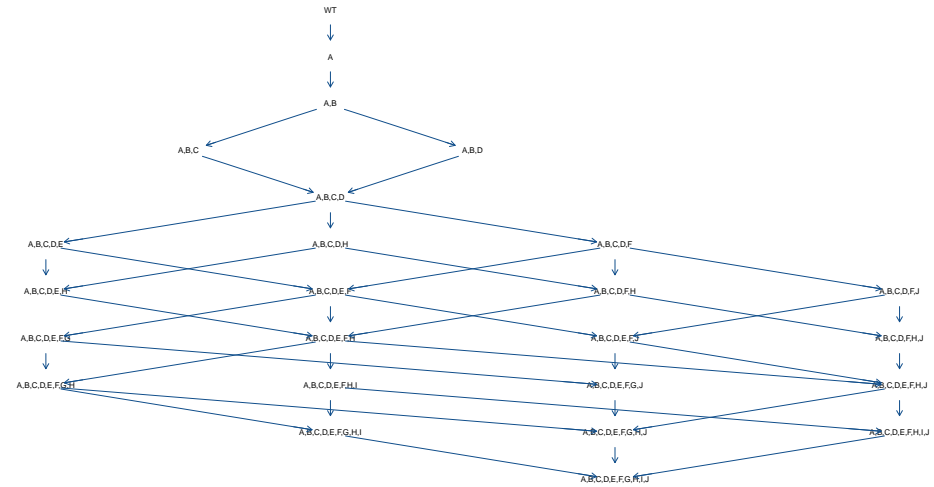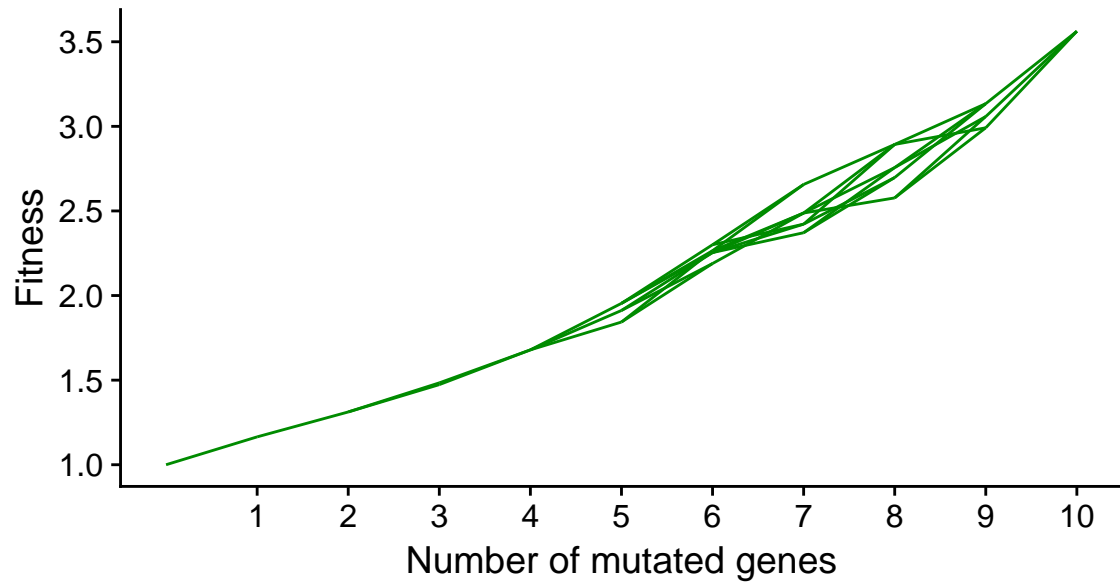

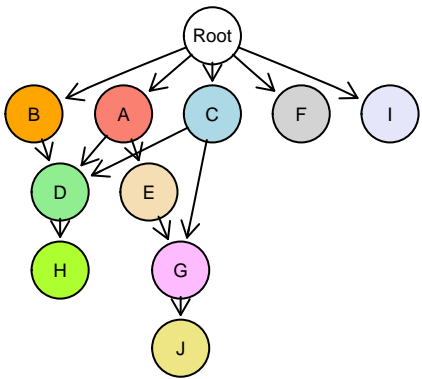

ID **G3GJI10gesv99QKDi**  
 acc genotypes **96**  
 peaks no back **1**  
 removed edges **0**  
 prop rem edges **0**

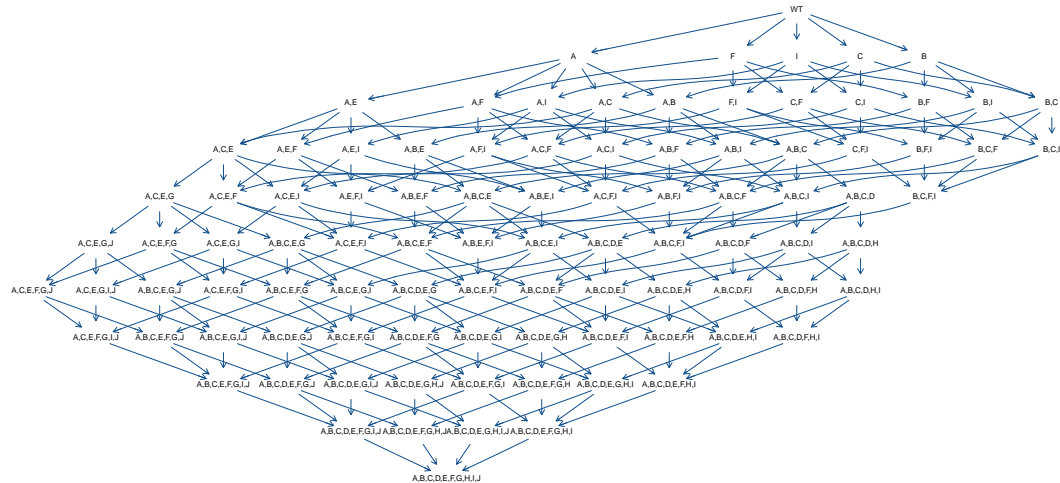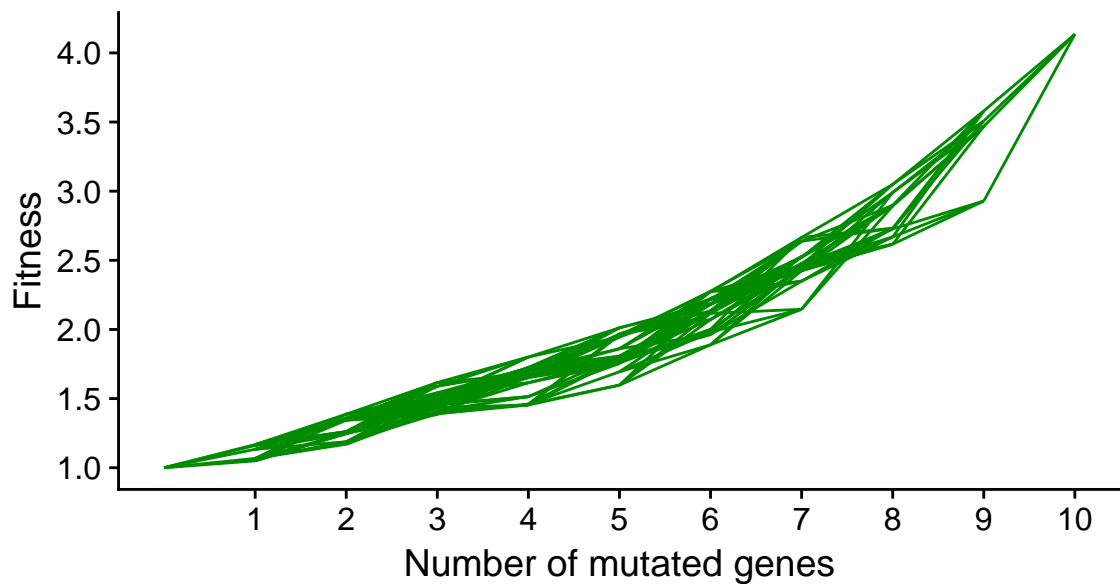

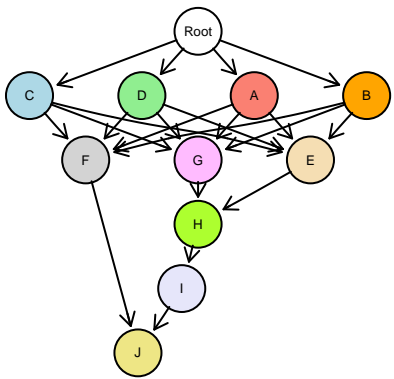

ID **gcBjSEP8ZTo7NX2w**  
 acc genotypes **28**  
 peaks no back 1  
 removed edges 0  
 prop rem edges 0

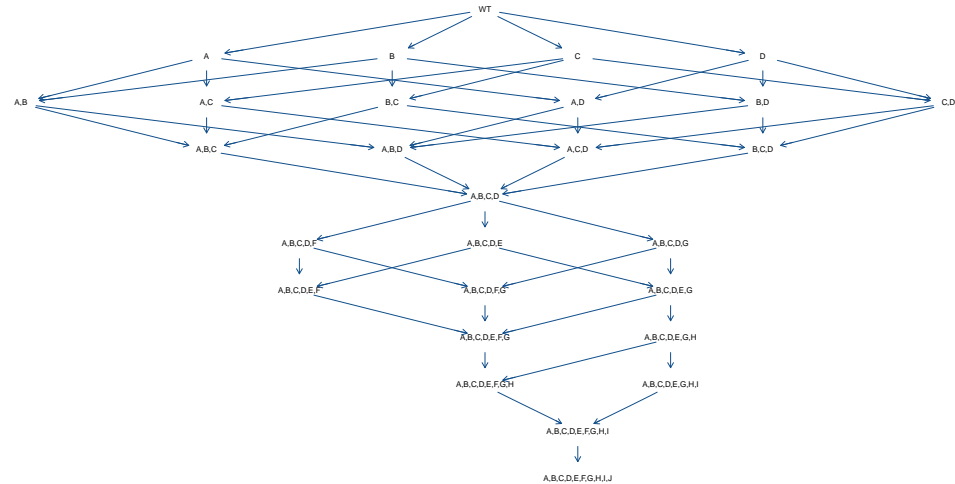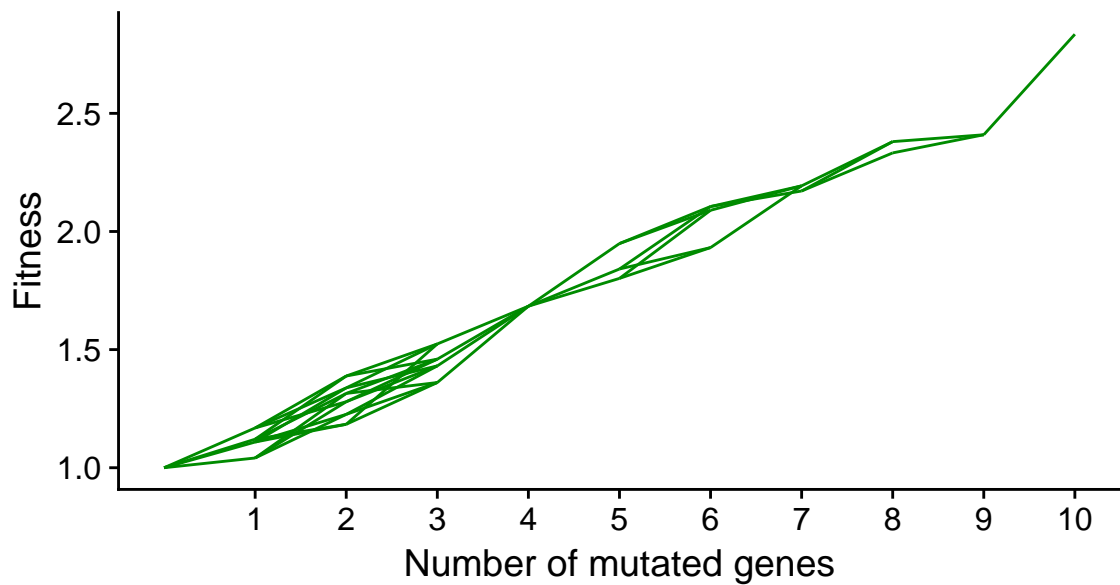

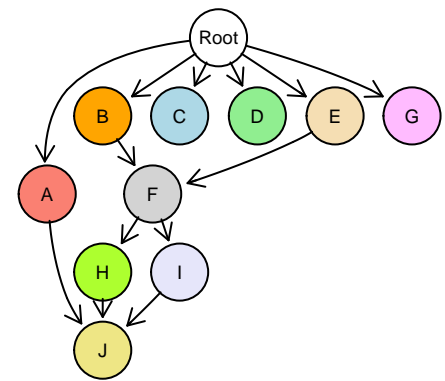

*ID* GdKyxu7pbMBmXsha  
*acc genotypes* 136  
*peaks no back* 1  
*removed edges* 0  
*prop rem edges* 0

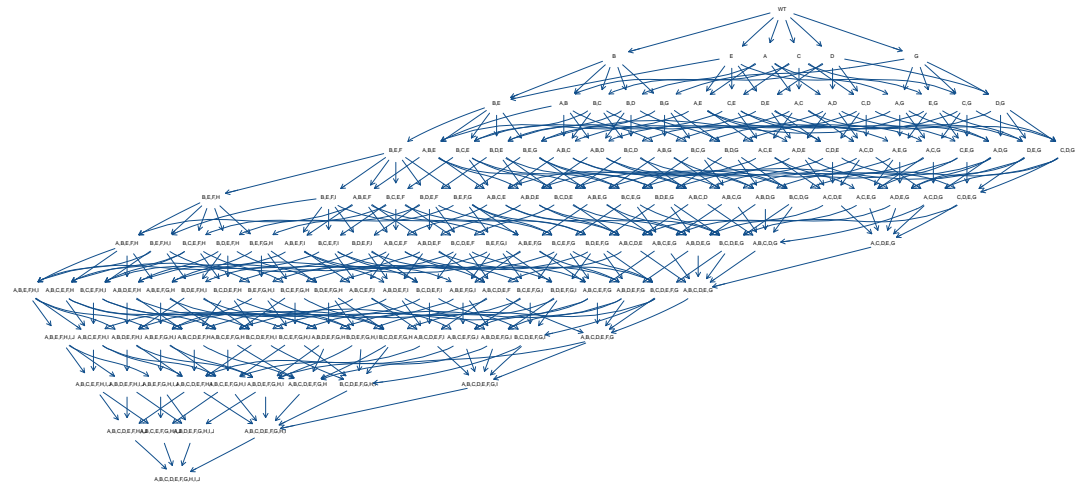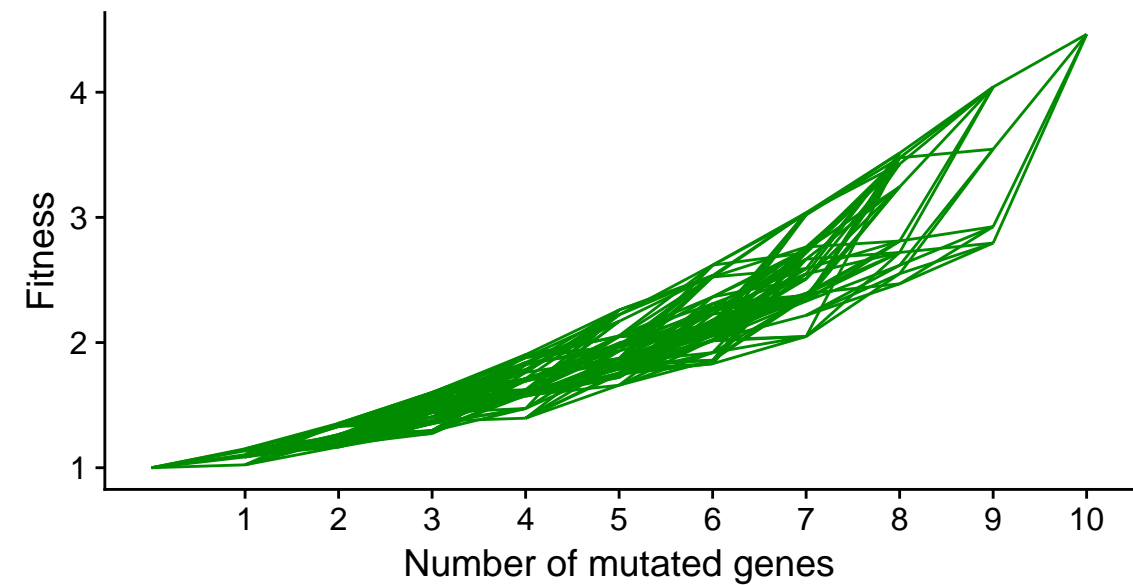

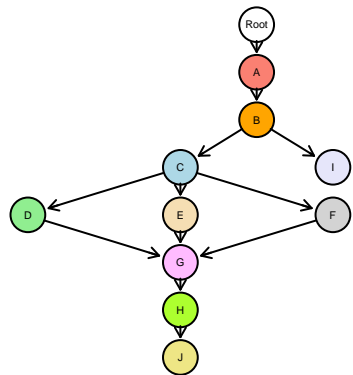

ID **GDWChzATMq5hpozJ**  
 acc genotypes **26**  
 peaks no back **1**  
 removed edges **0**  
 prop rem edges **0**

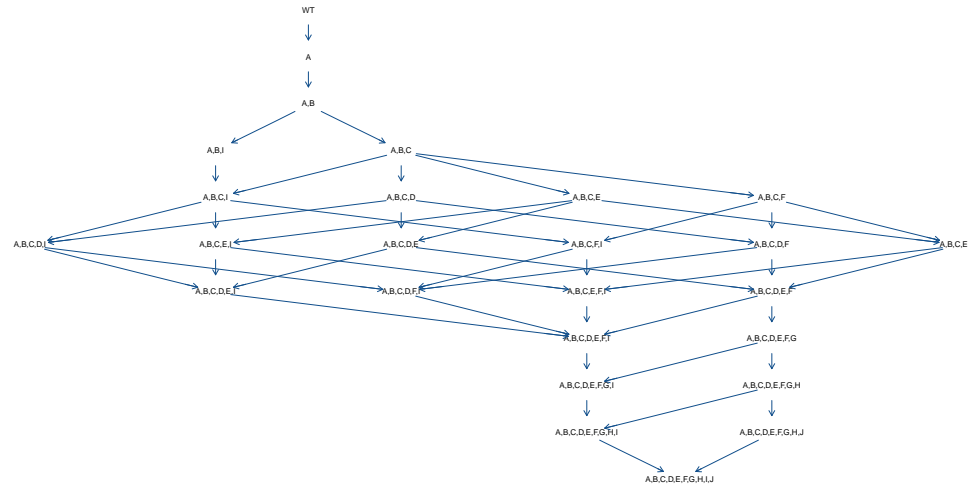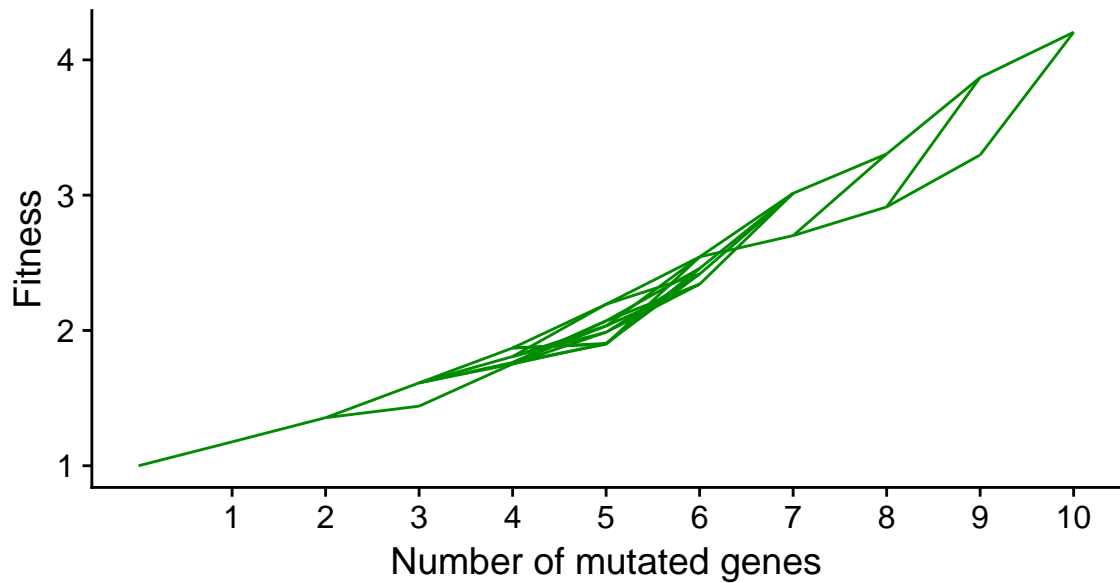

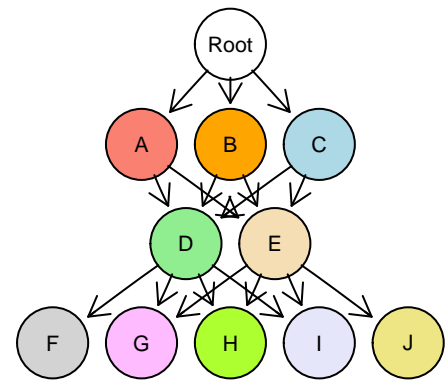

ID **gNDvvHs3jYcerc7I**  
 acc genotypes **44**  
 peaks no back 1  
 removed edges 0  
 prop rem edges 0

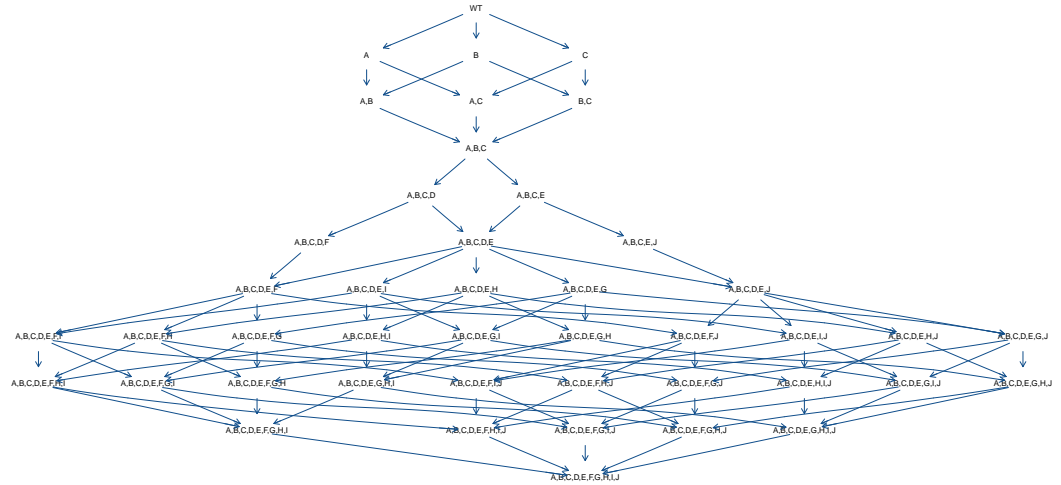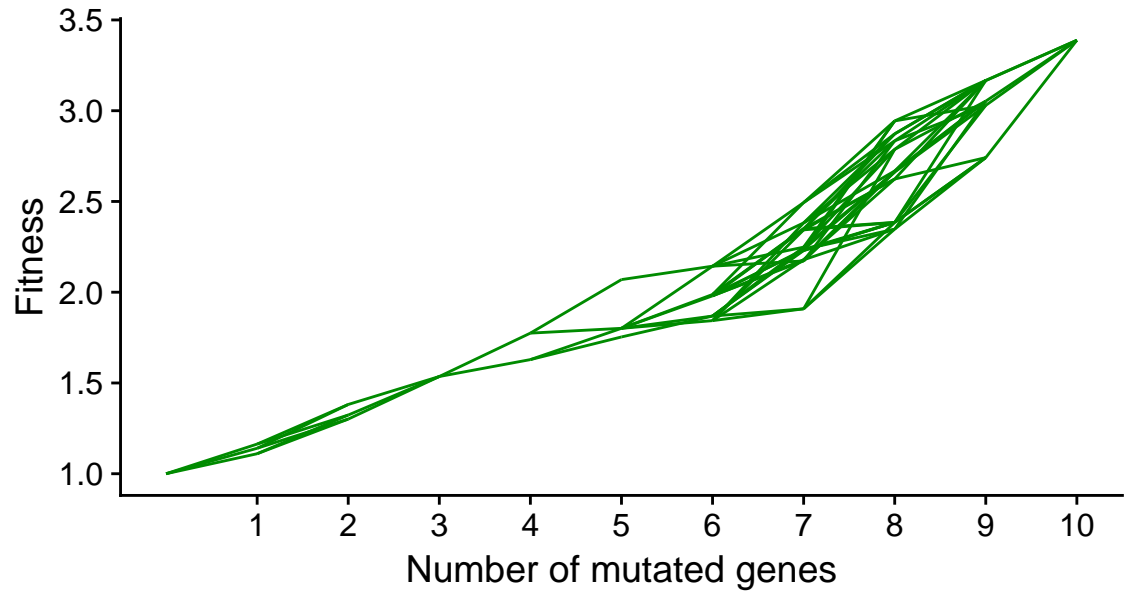



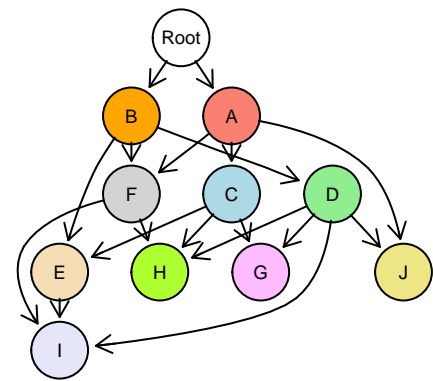

*ID* `gqmarqZNpxa6L2Zx`  
*acc genotypes* `47`  
*peaks no back* `1`  
*removed edges* `0`  
*prop rem edges* `0`

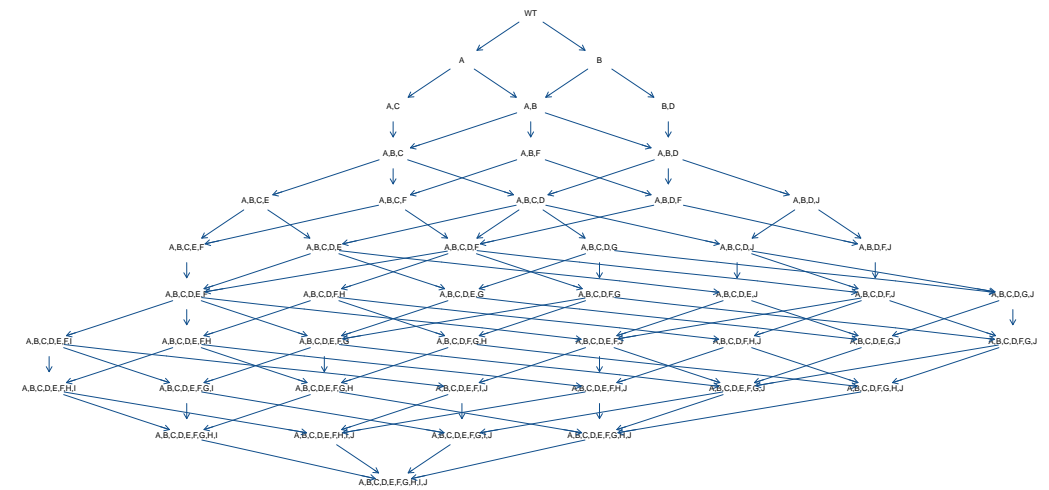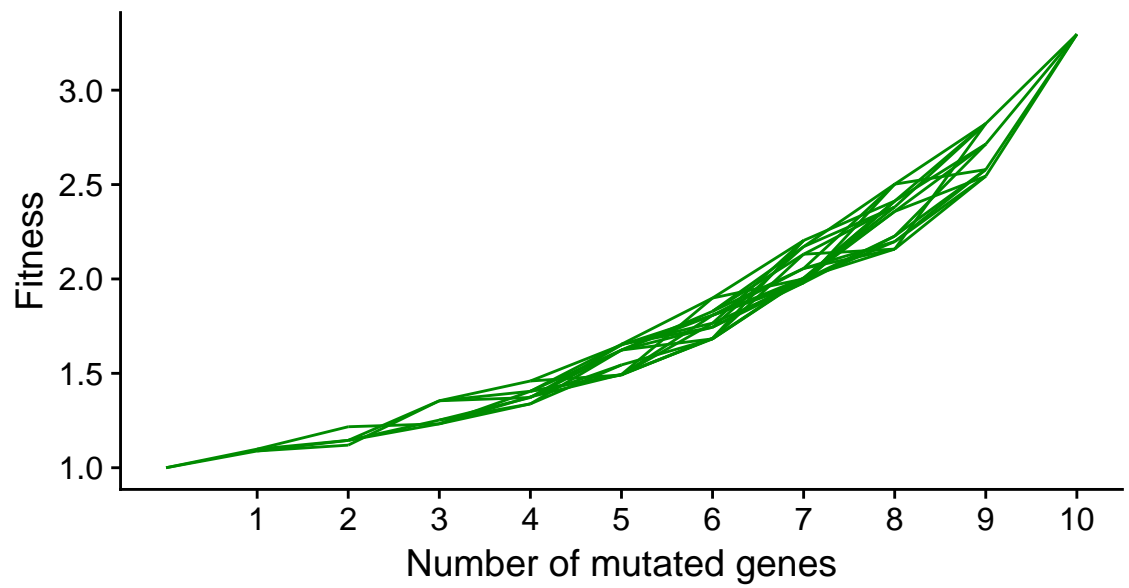

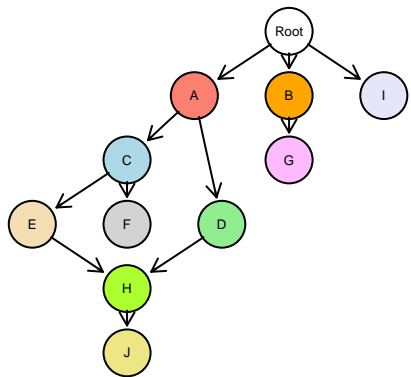

ID **gYZAxs6hKIMQf3Ca**  
 acc genotypes **90**  
 peaks no back **1**  
 removed edges **0**  
 prop rem edges **0**

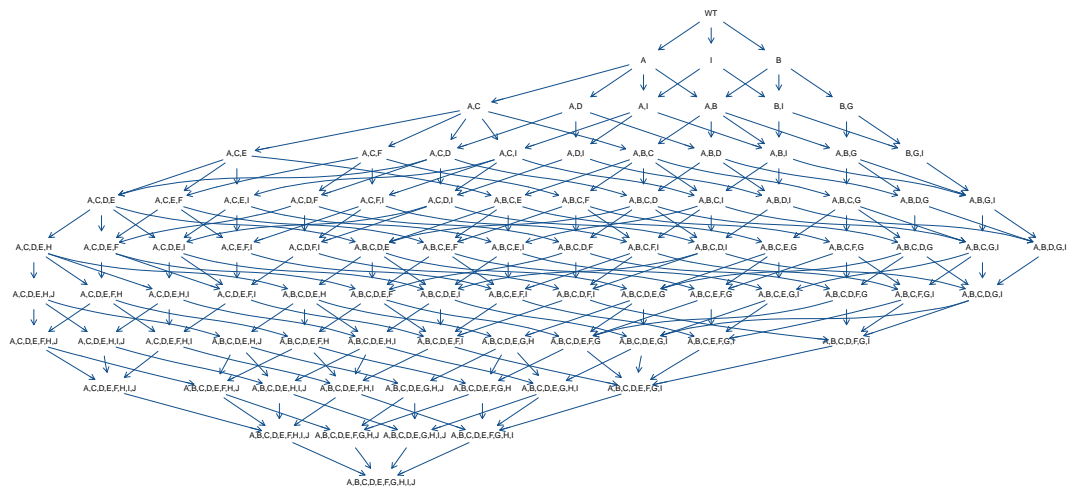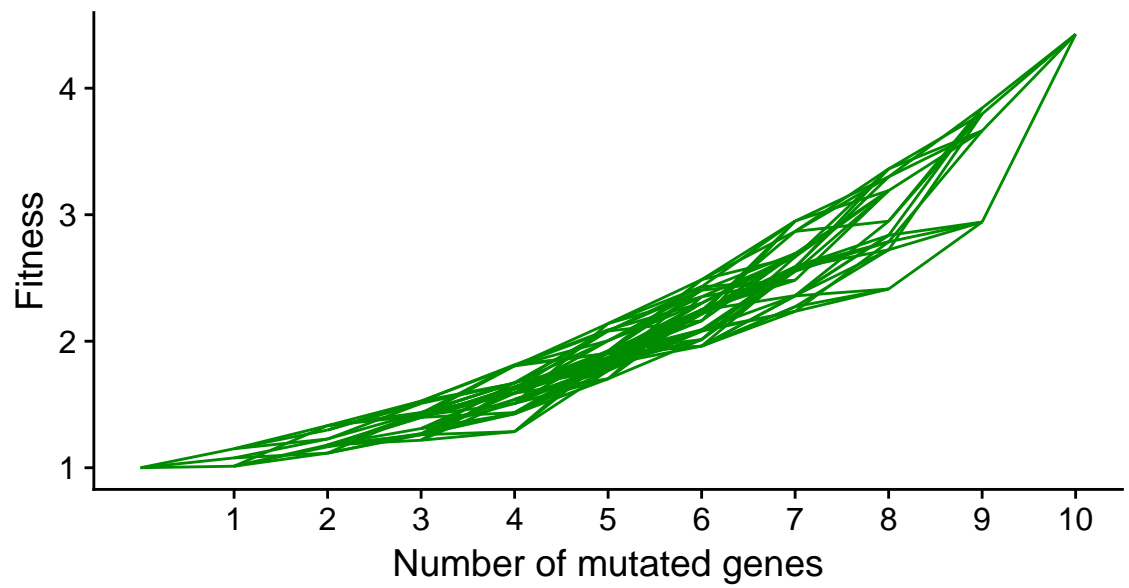

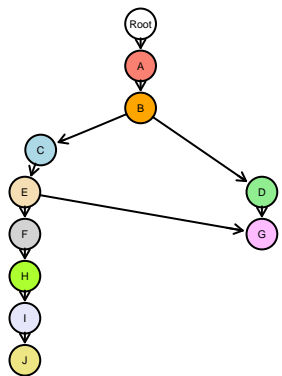

*ID* H10RfX4lukGLEX1kv  
*acc genotypes* 21  
*peaks no back* 1  
*removed edges* 0  
*prop rem edges* 0

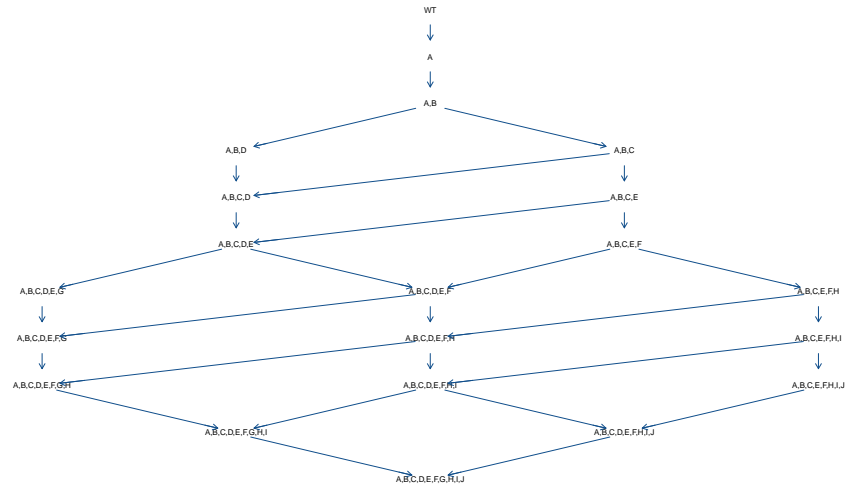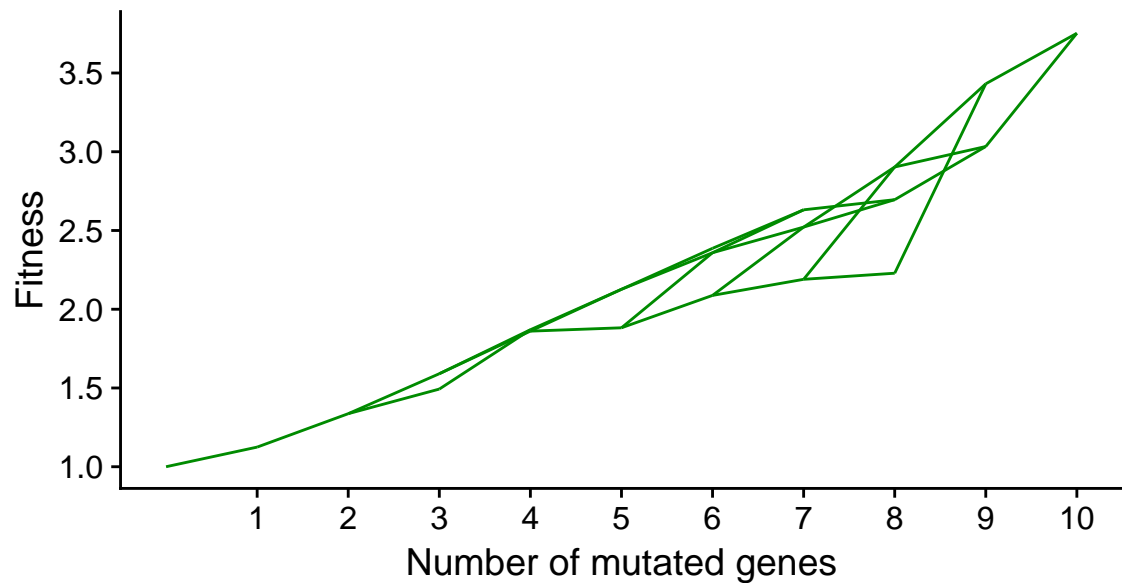

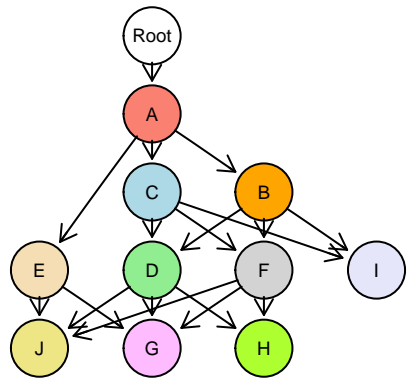

*ID* HaVk9ppjvDygF8e  
*acc genotypes* 39  
*peaks no back* 1  
*removed edges* 0  
*prop rem edges* 0

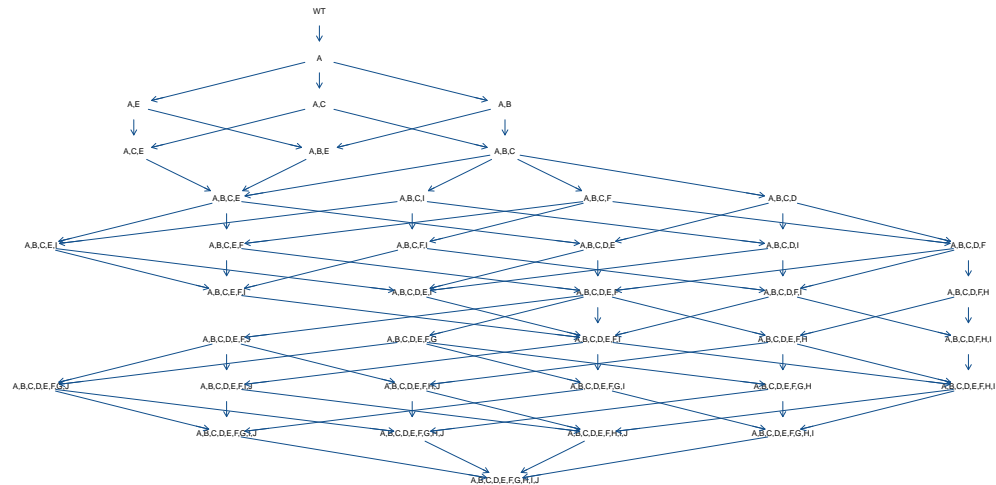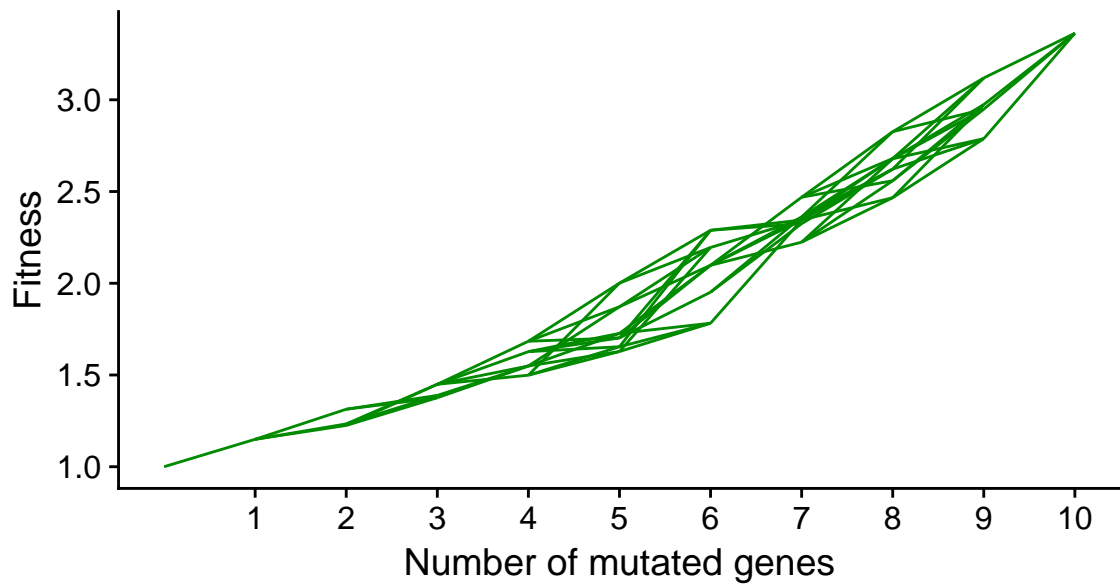

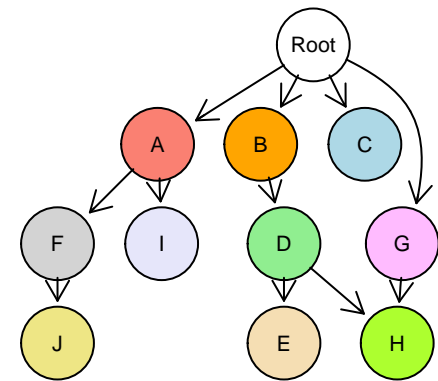

*ID* hB1YoS6mVpFbv6aL  
*acc genotypes* 140  
*peaks no back* 1  
*removed edges* 0  
*prop rem edges* 0

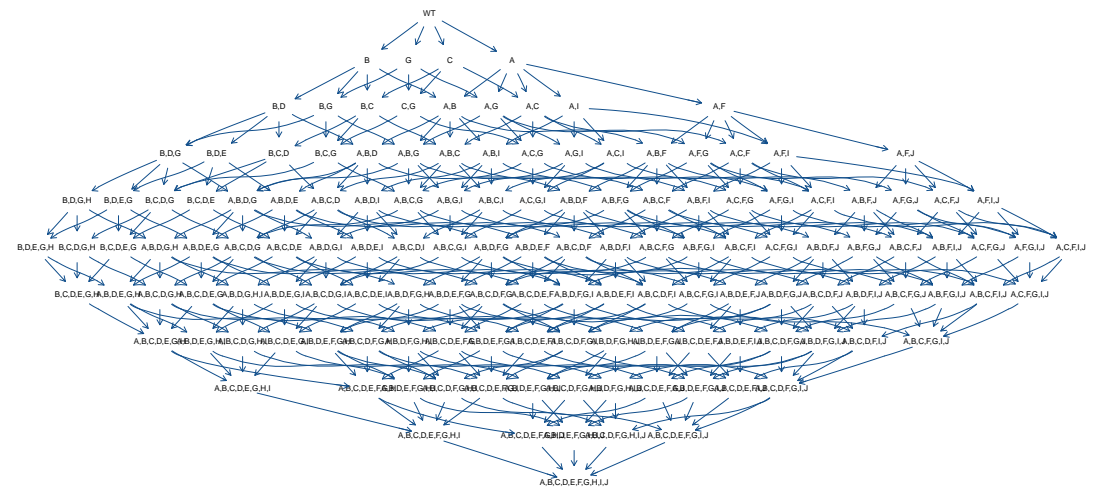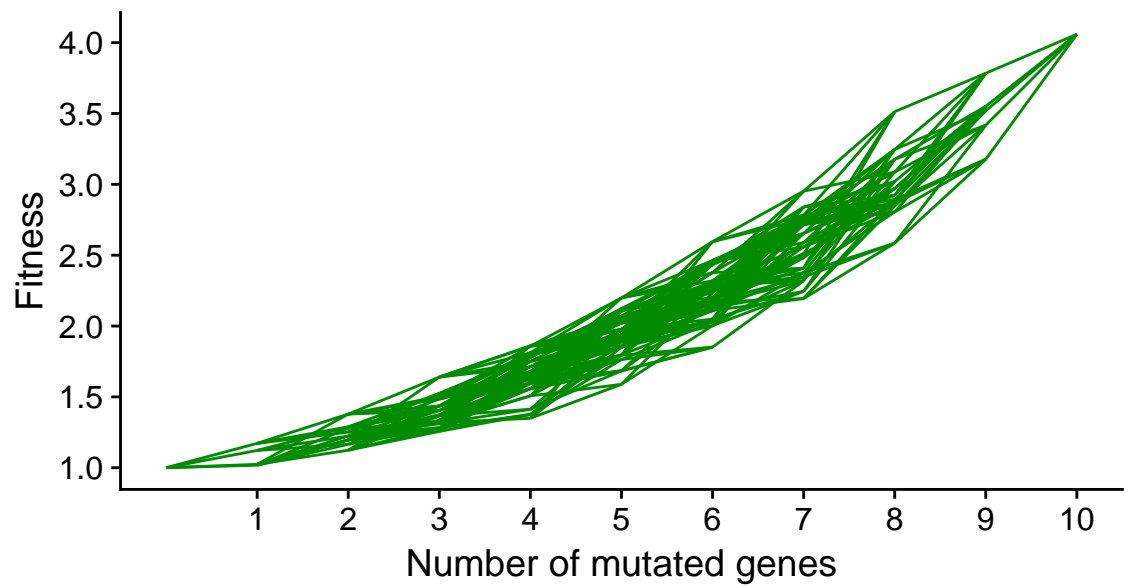

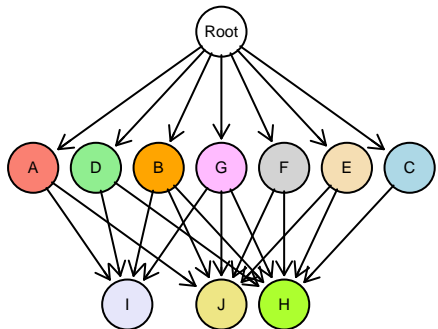

ID [hilmr3F710LYpQsGL](#)  
 acc genotypes **147**  
 peaks no back 1  
 removed edges 0  
 prop rem edges 0

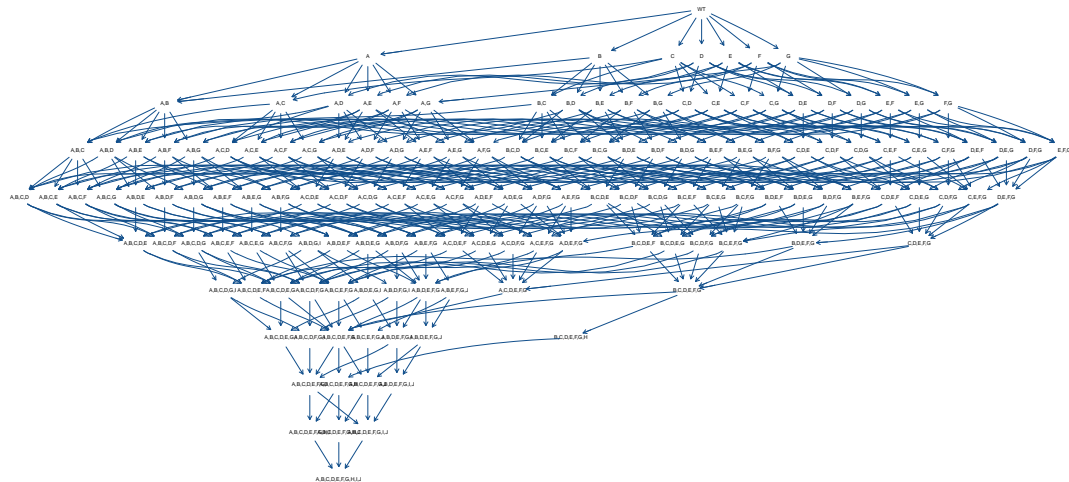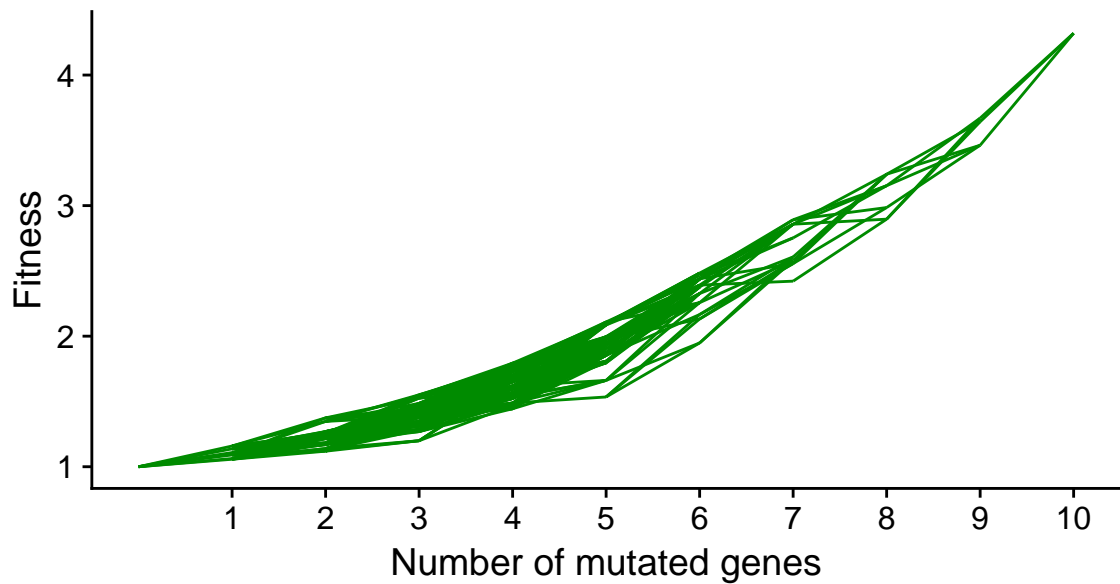

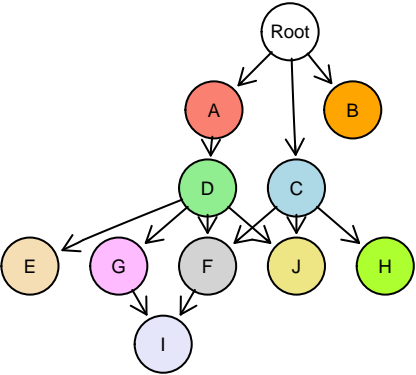

ID **hNfoY8xLhb3Nf7ZZ**  
acc genotypes **100**  
peaks no back 1  
removed edges 0  
prop rem edges 0

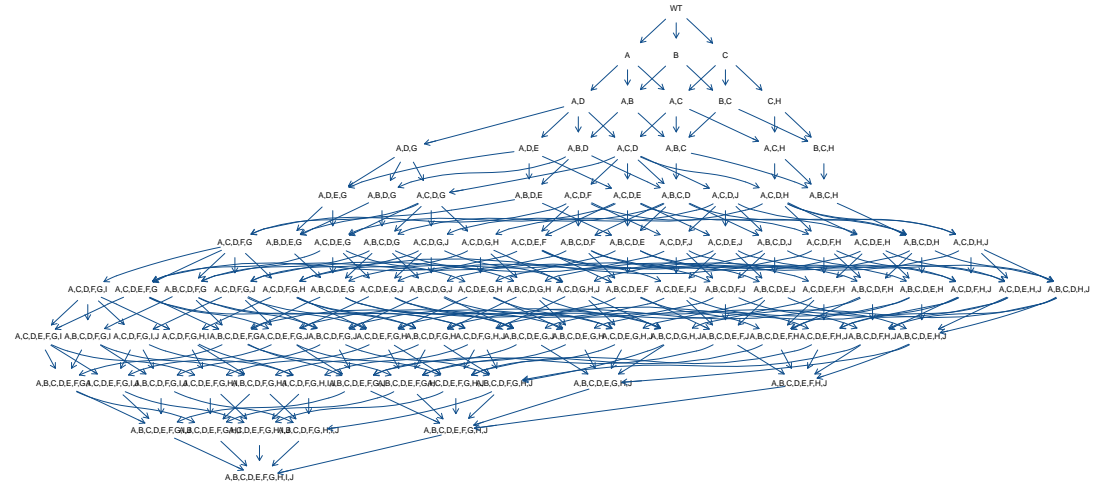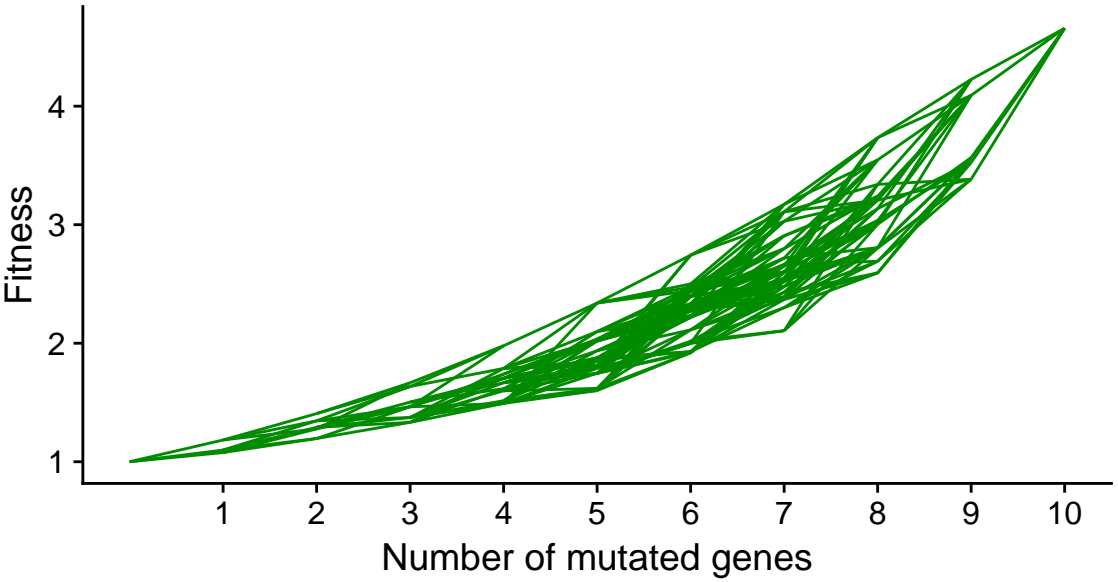

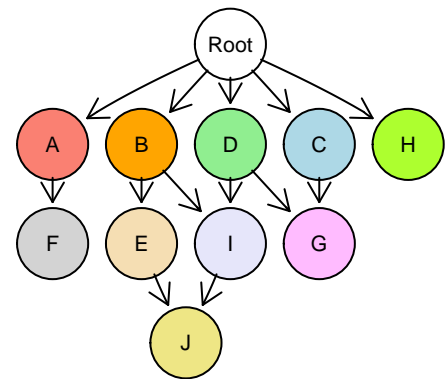

*ID* HnZ10pnWSr3M1MXbv  
*acc genotypes* 144  
*peaks no back* 1  
*removed edges* 0  
*prop rem edges* 0

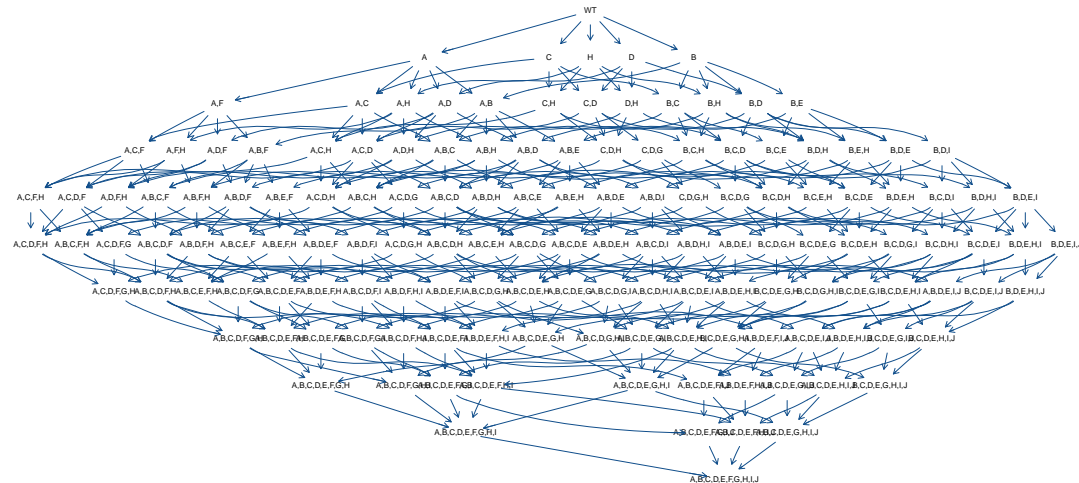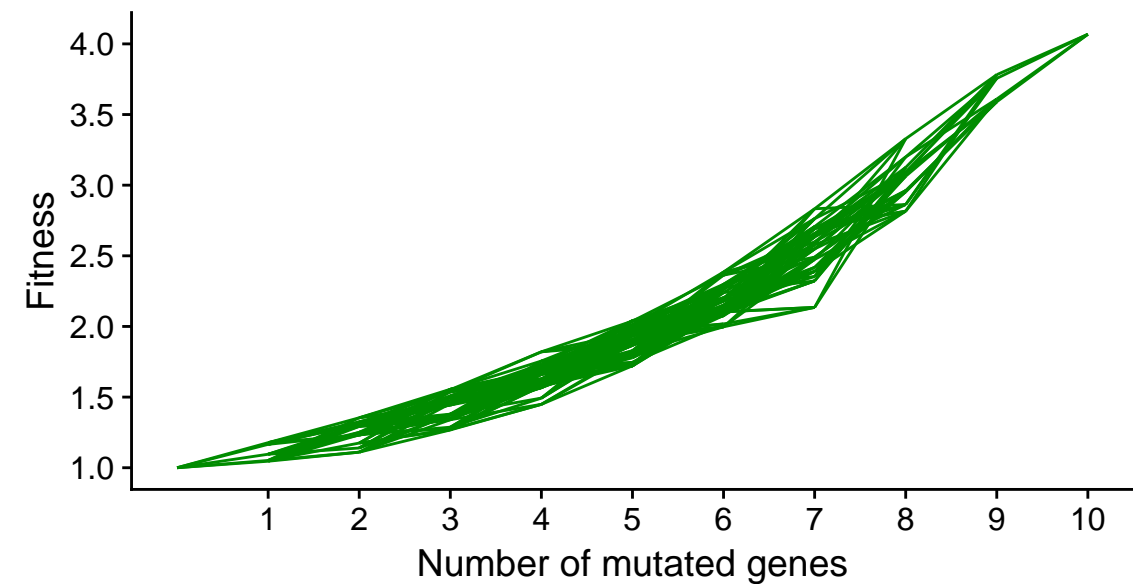



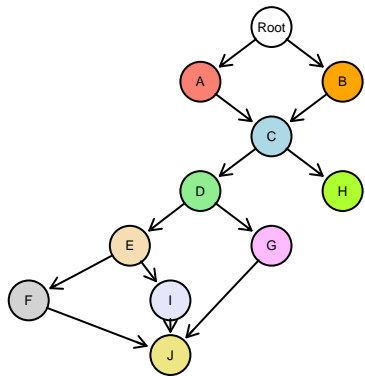

ID **Hon2Ud6RNbFJ826U**  
 acc genotypes **28**  
 peaks no back **1**  
 removed edges **0**  
 prop rem edges **0**

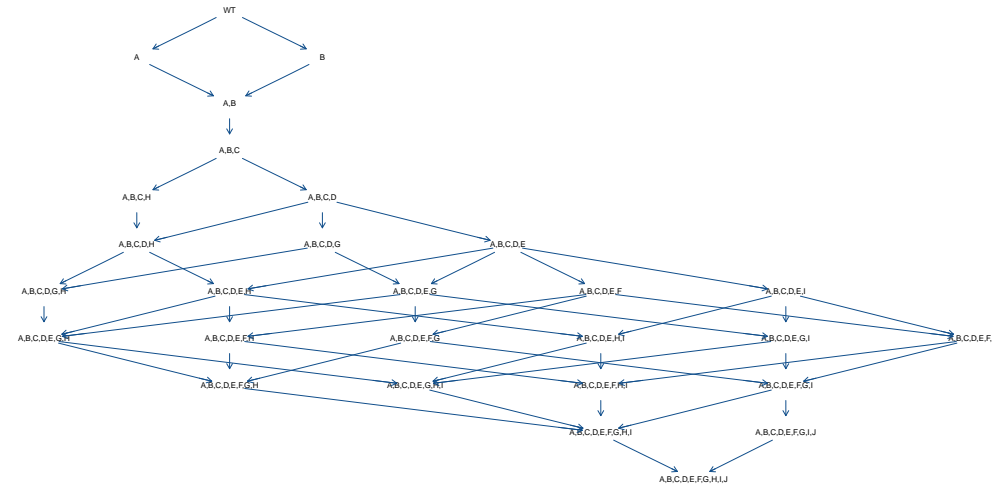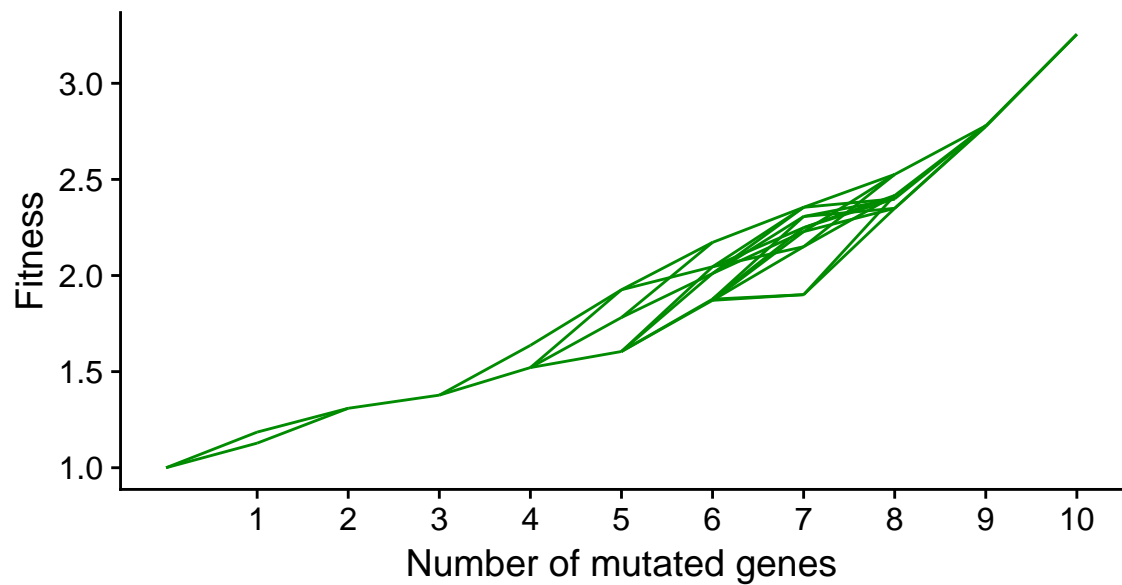

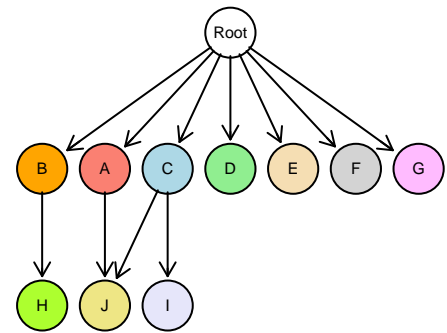

*ID* hqhSp8AzeBqMadTe  
*acc genotypes* 384  
*peaks no back* 1  
*removed edges* 0  
*prop rem edges* 0

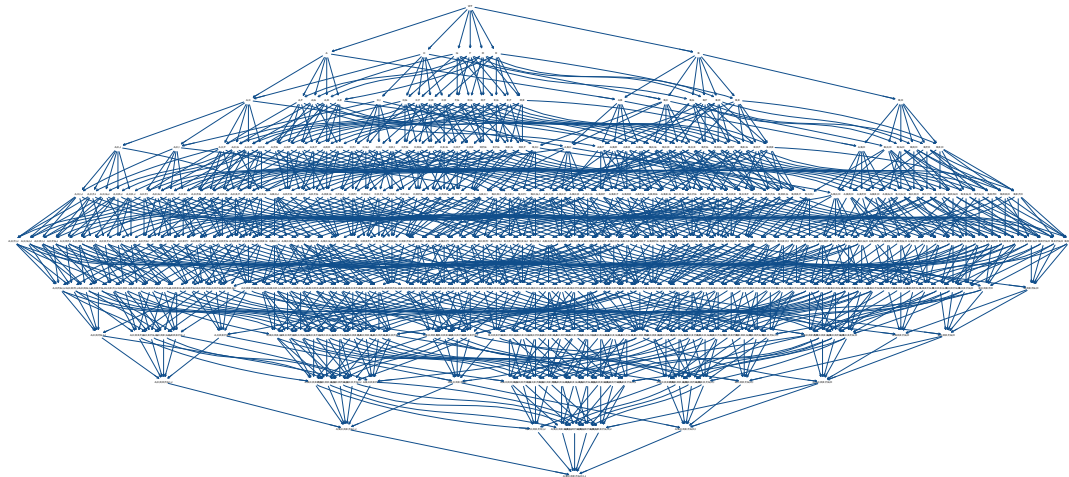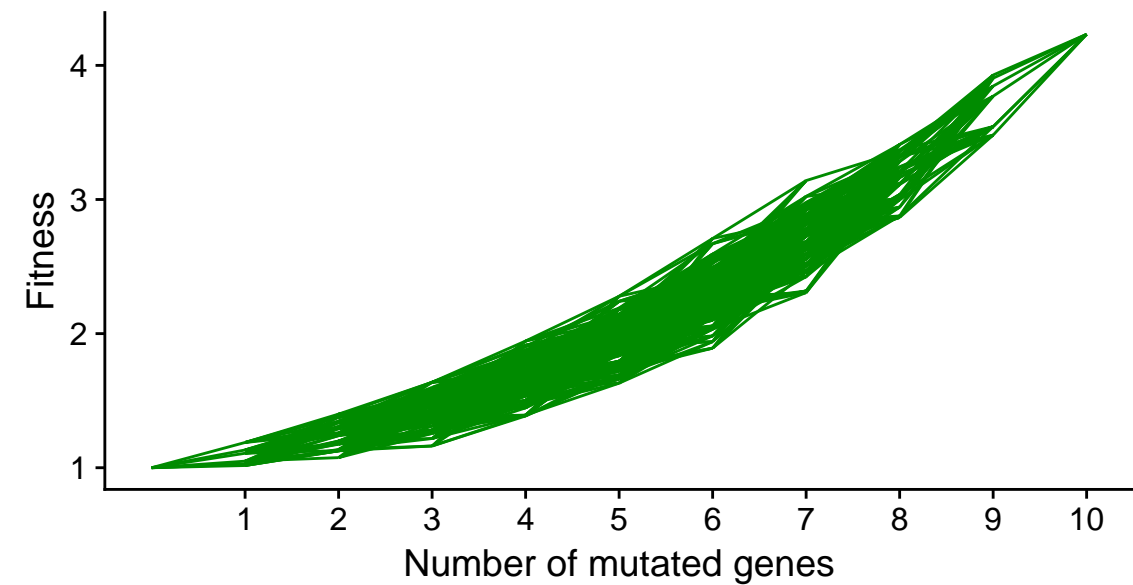

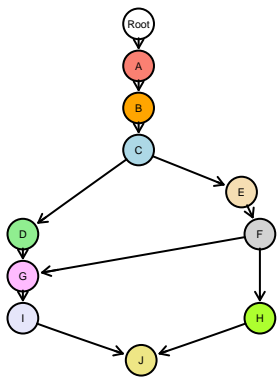

*ID* hshAK10qbNh6UkHAB  
*acc genotypes* 16  
*peaks no back* 1  
*removed edges* 0  
*prop rem edges* 0

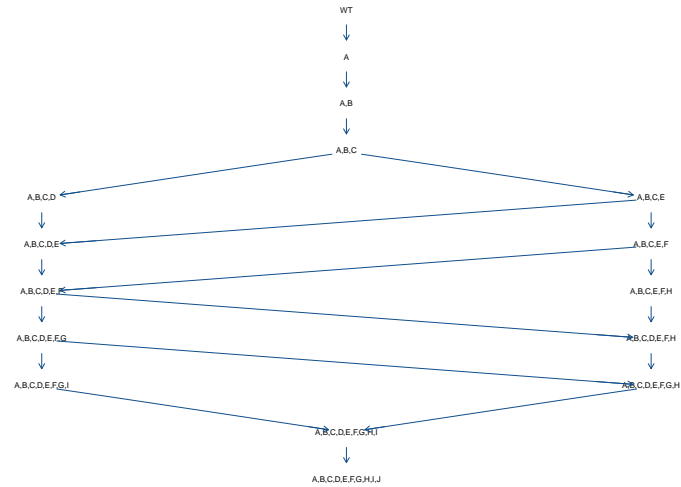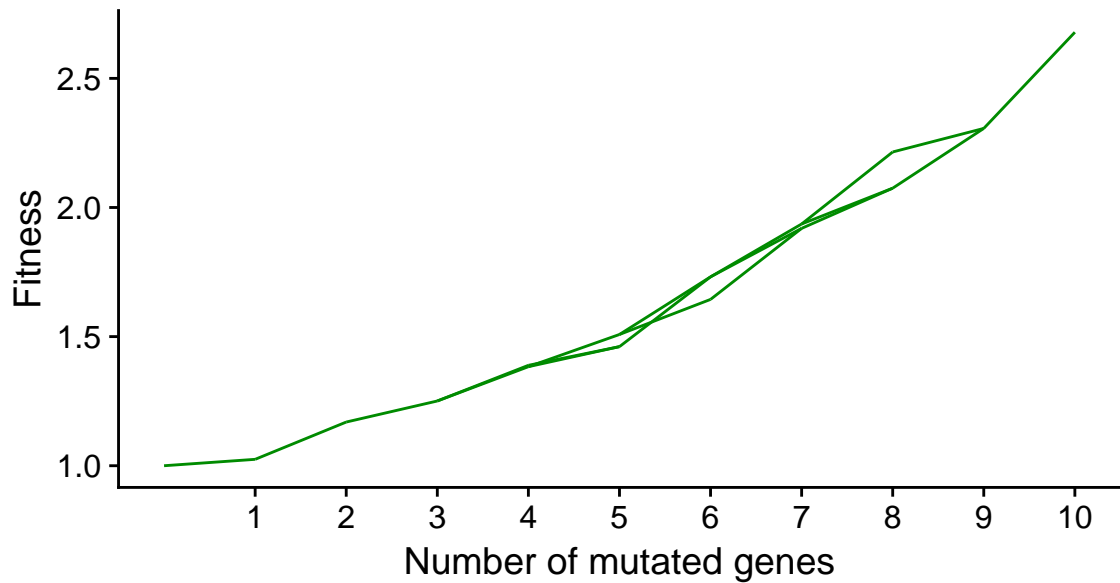

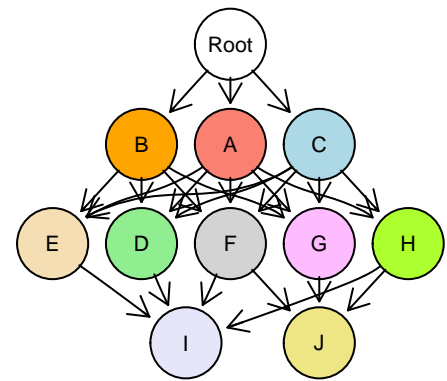

*ID* HXhpKGzcwUfILLeF  
*acc genotypes* 47  
*peaks no back* 1  
*removed edges* 0  
*prop rem edges* 0

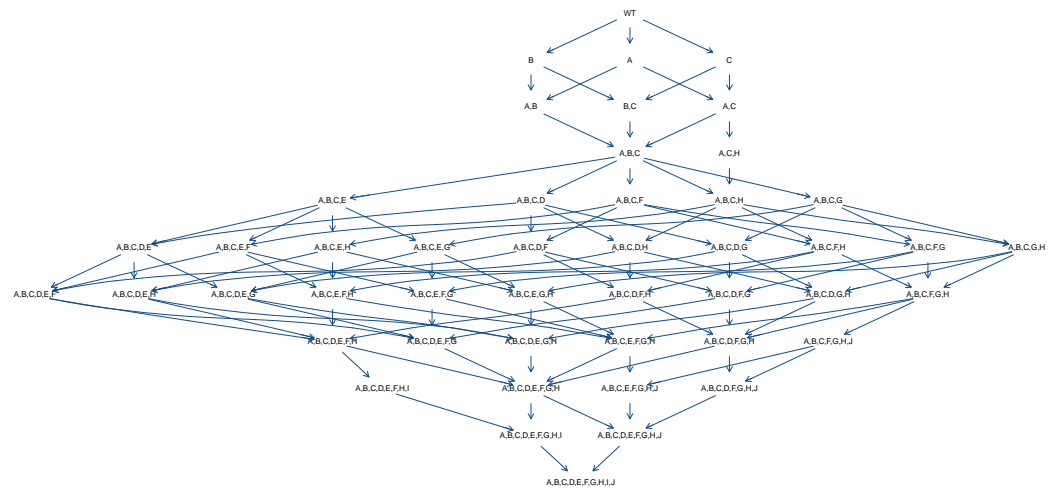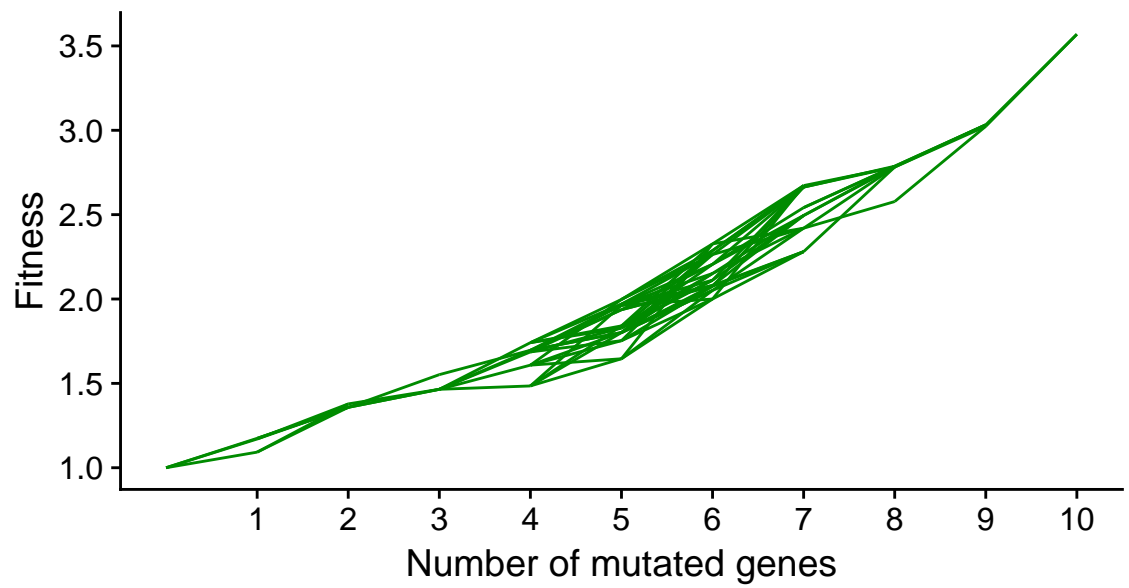

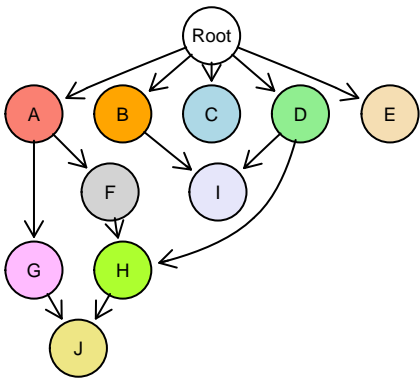

ID HXibbT4wtp8elqYm  
 acc genotypes 136  
 peaks no back 1  
 removed edges 0  
 prop rem edges 0

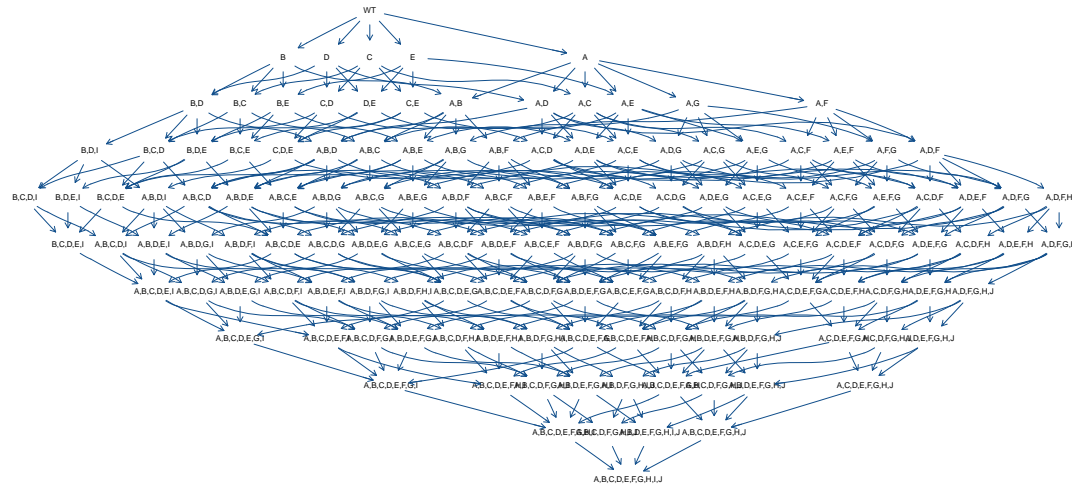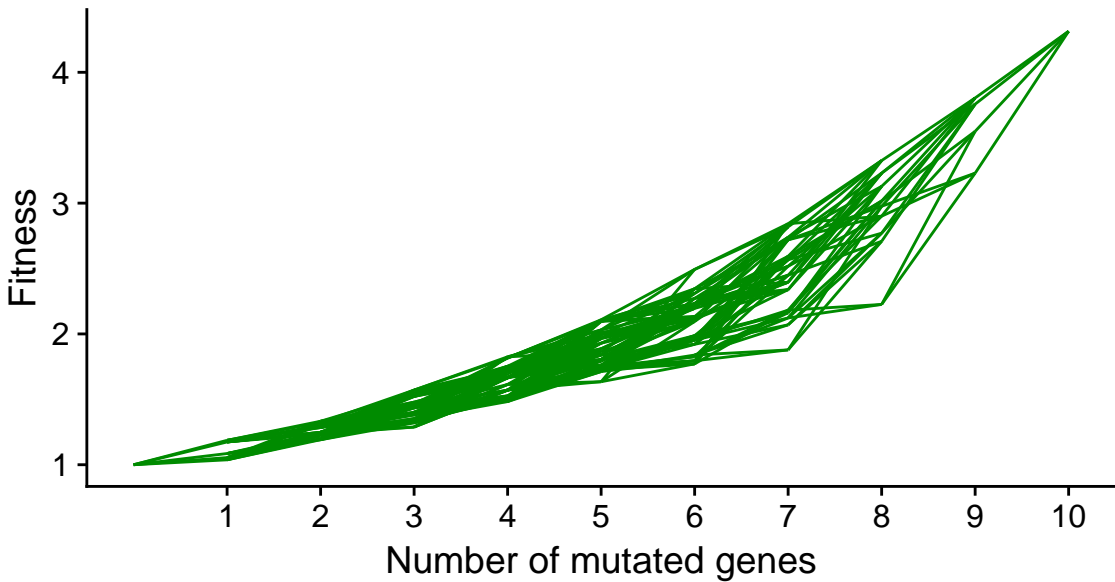

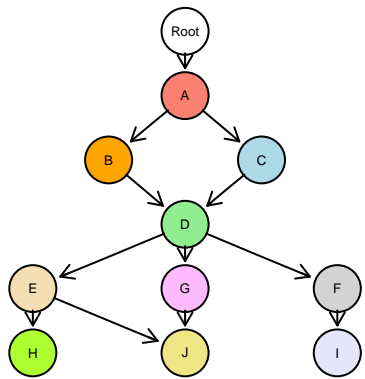

*ID* IBfkuKvC5LnGkILI  
*acc genotypes* 29  
*peaks no back* 1  
*removed edges* 0  
*prop rem edges* 0

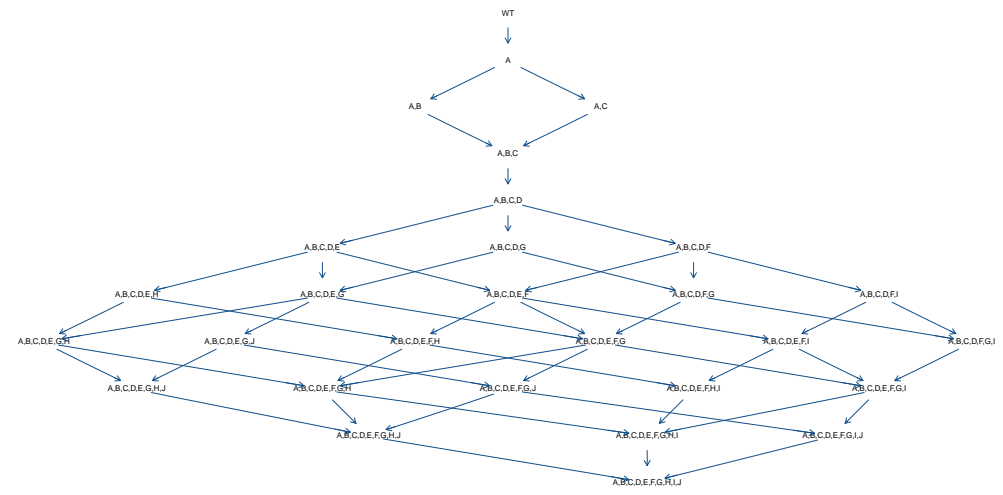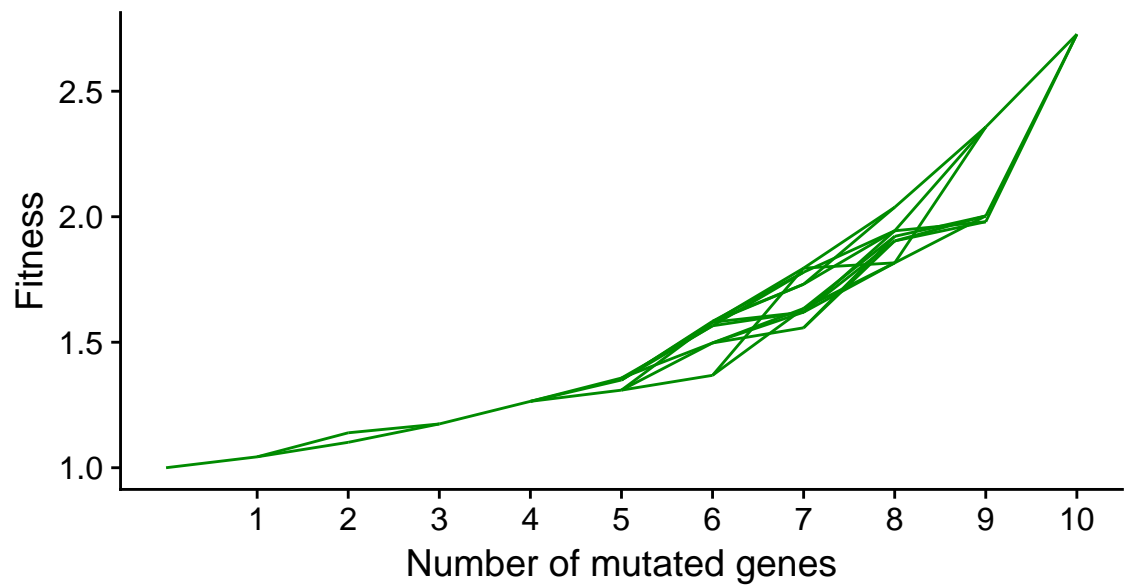

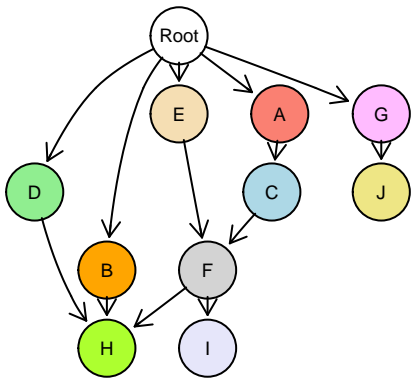

*ID*      **ibqlgMnpLmhx8hJy**  
*acc genotypes*      **102**  
*peaks no back*      1  
*removed edges*      0  
*prop rem edges*      0

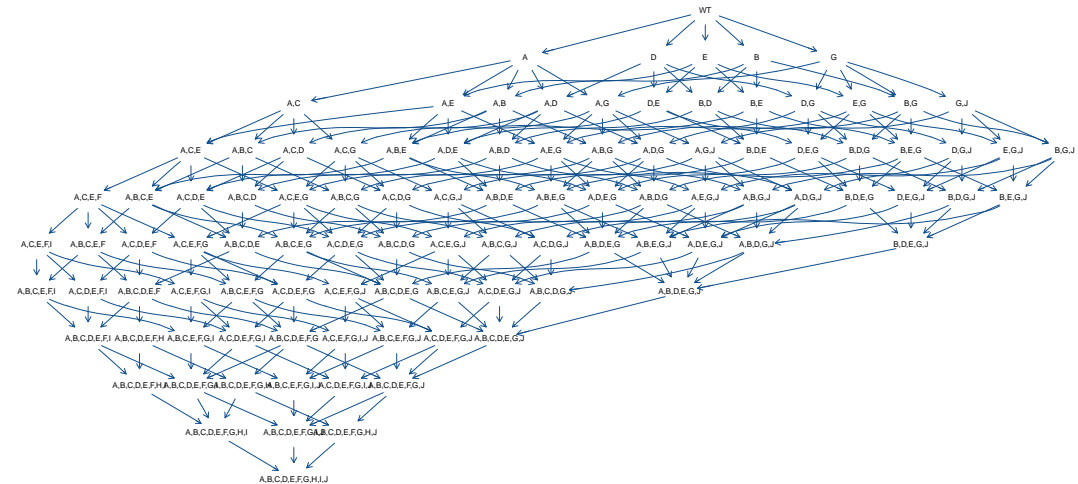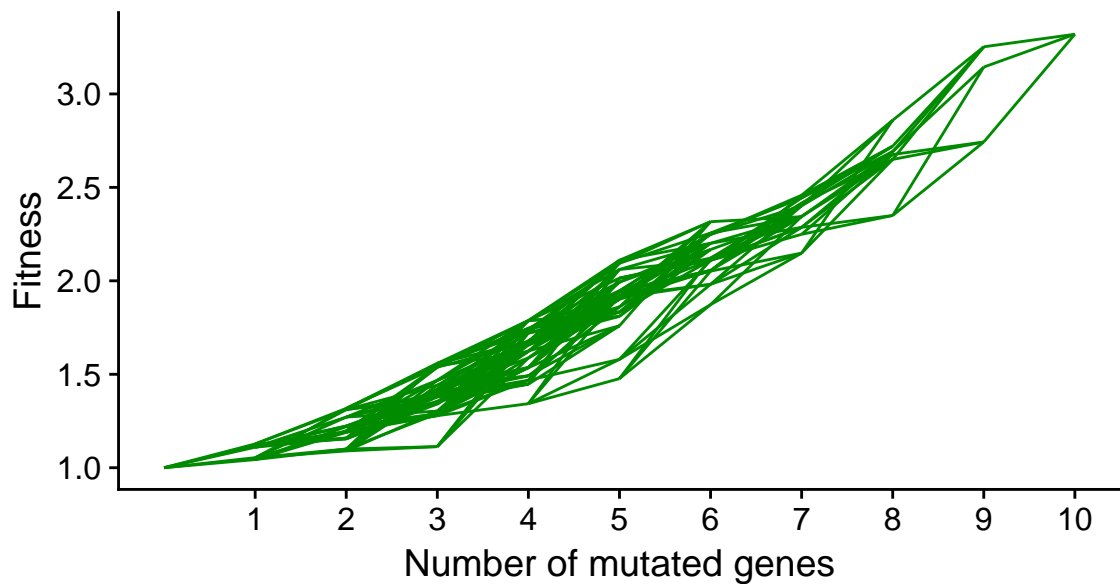

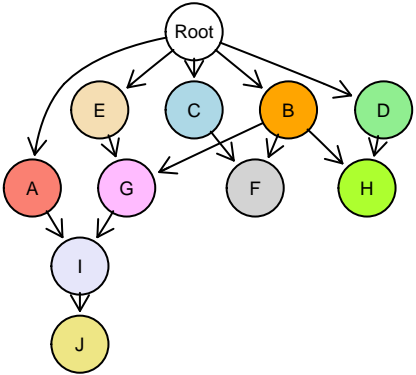

ID IFzpx6g9rMSHRpvL  
 acc genotypes 88  
 peaks no back 1  
 removed edges 0  
 prop rem edges 0

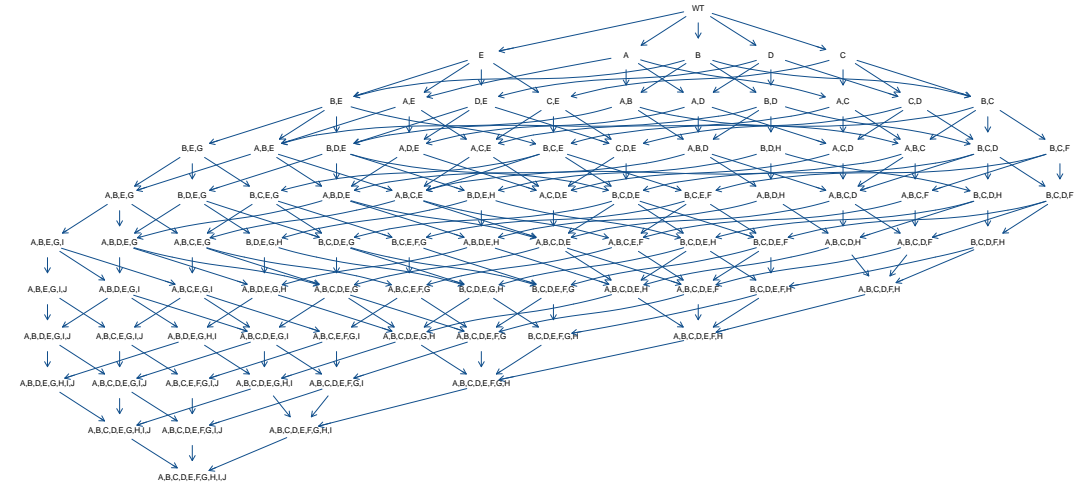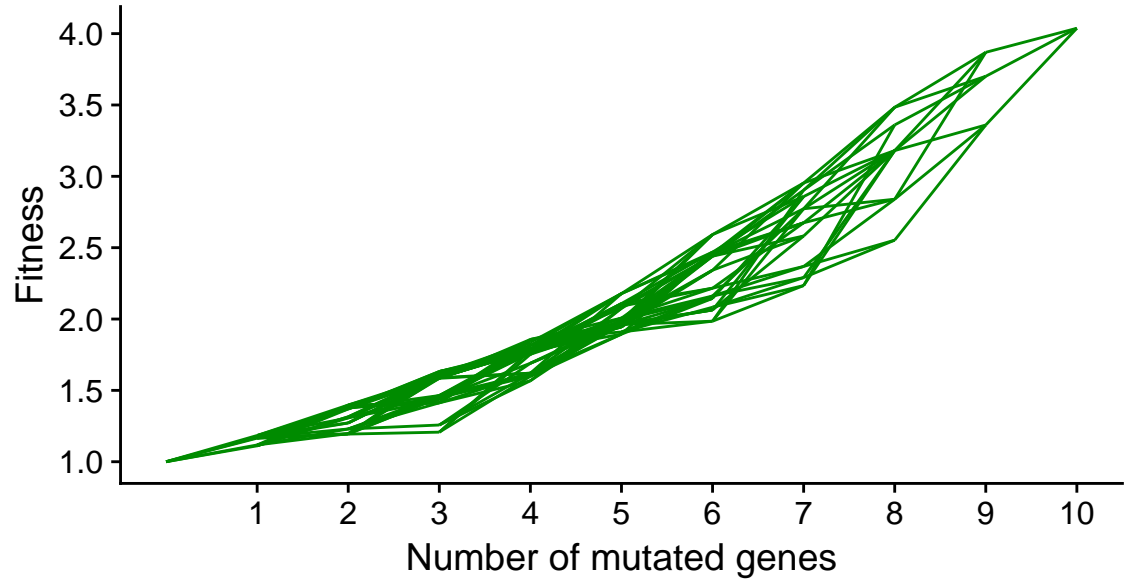



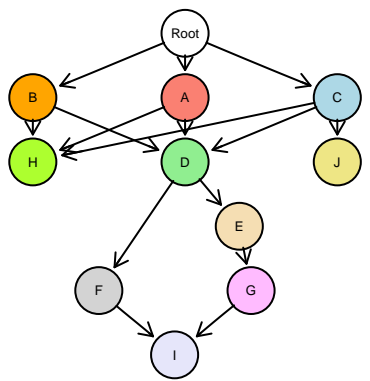

ID **IGNIamDyyL6pJkAH**  
 acc genotypes **42**  
 peaks no back **1**  
 removed edges **0**  
 prop rem edges **0**

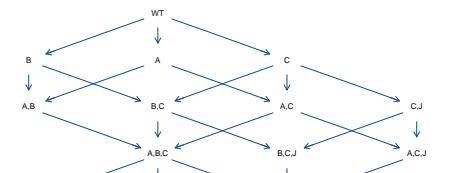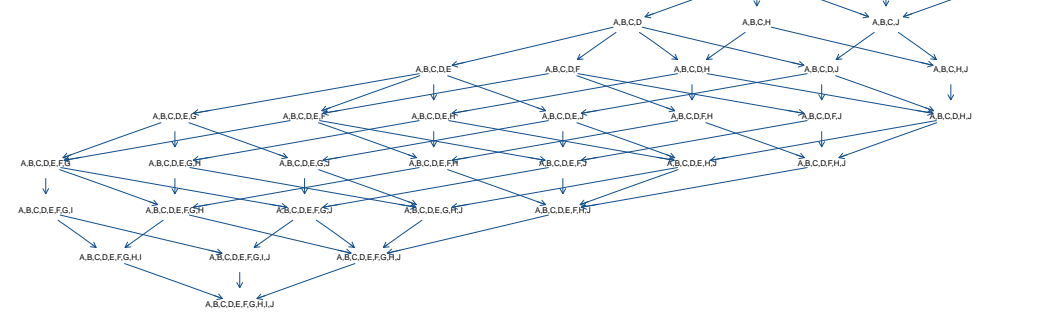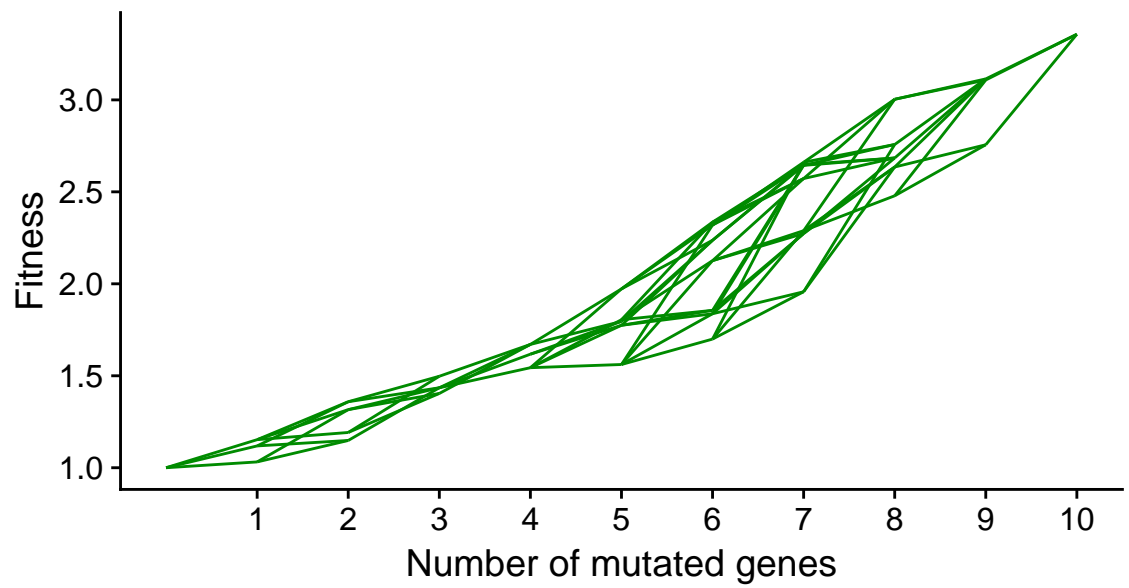

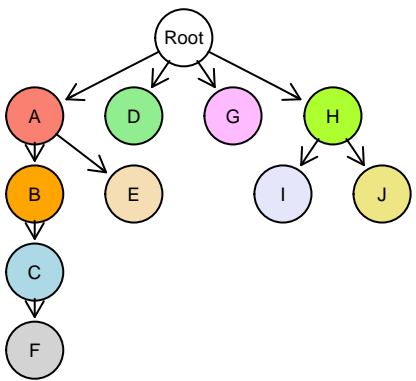

*ID* IY6ewqbwnTGL76Q  
*acc genotypes* 180  
*peaks no back* 1  
*removed edges* 0  
*prop rem edges* 0

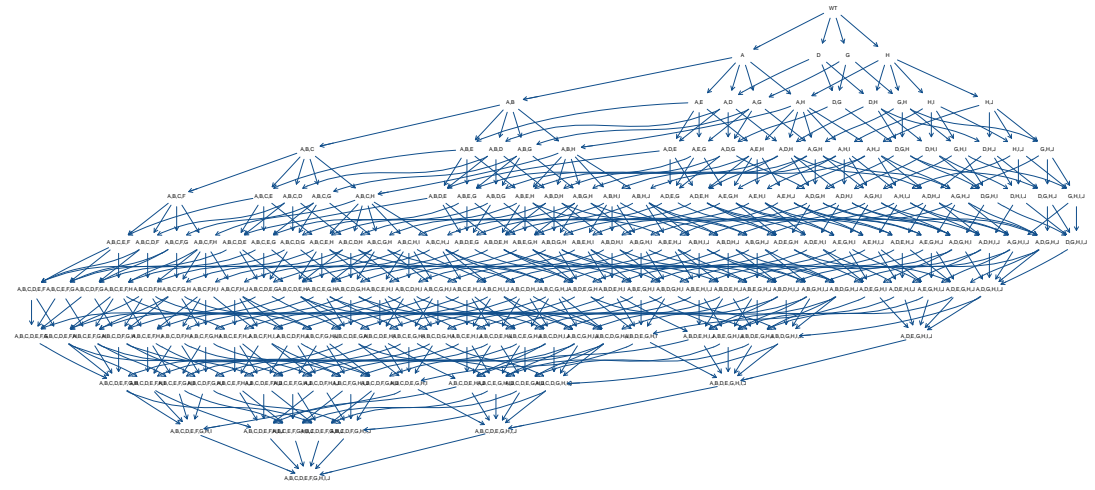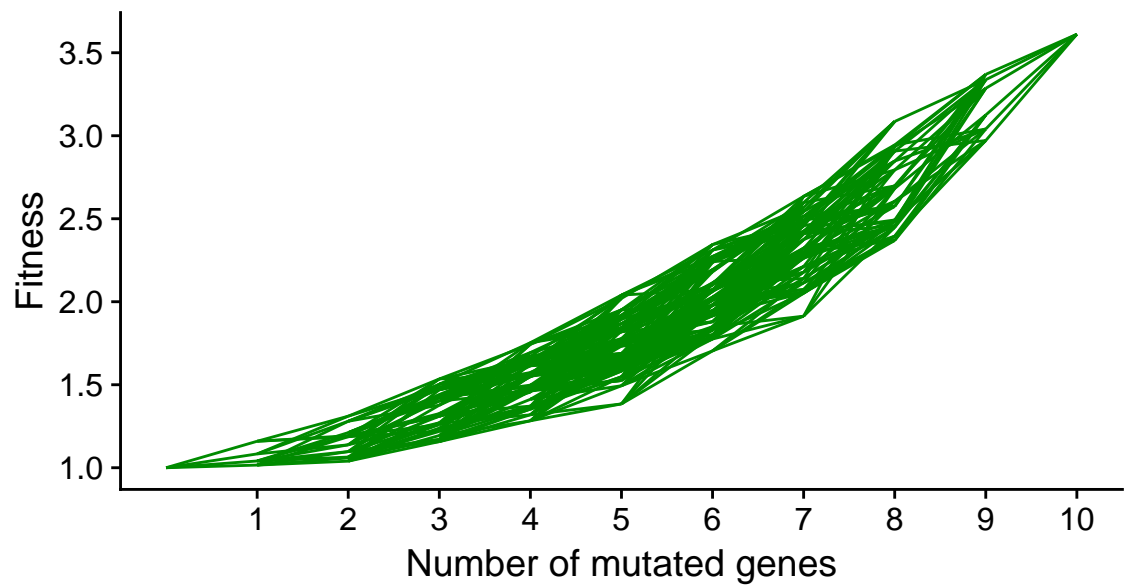

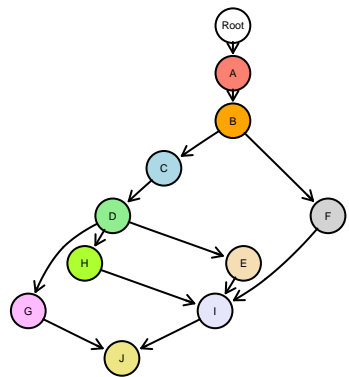

ID IJ82SrhcD1ULypf8  
 acc genotypes 25  
 peaks no back 1  
 removed edges 0  
 prop rem edges 0

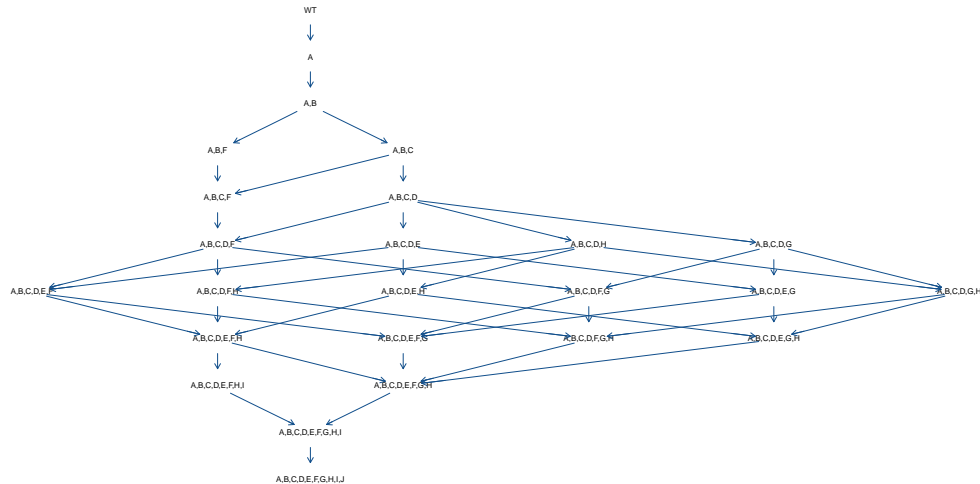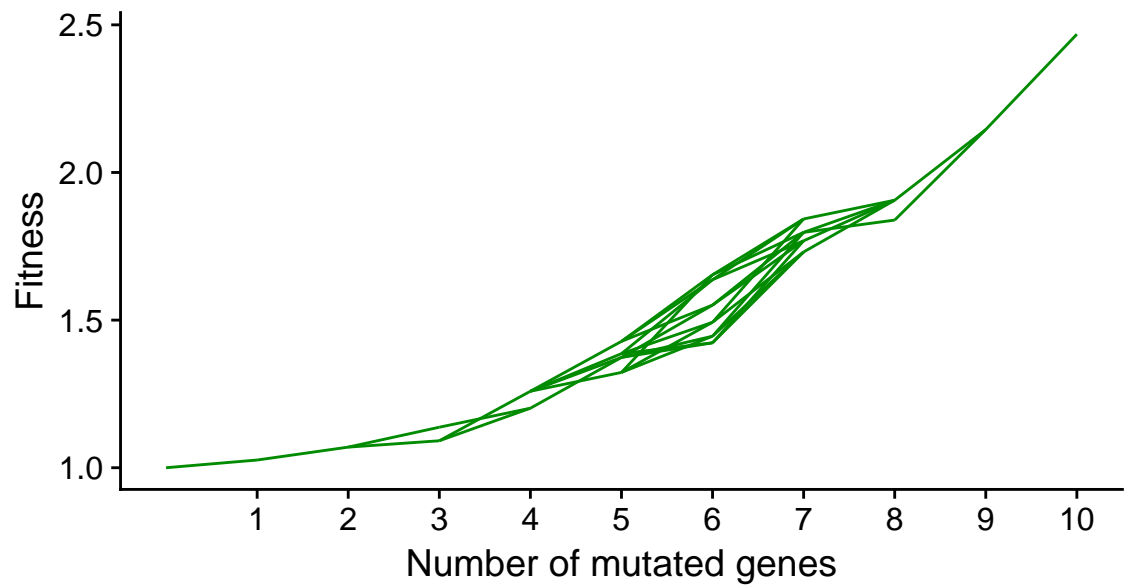

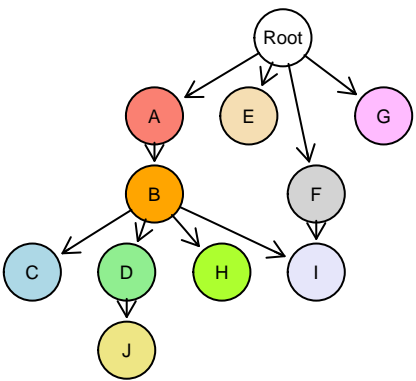

*ID* lqyqZ4siy10VLgJ5s  
*acc genotypes* 160  
*peaks no back* 1  
*removed edges* 0  
*prop rem edges* 0

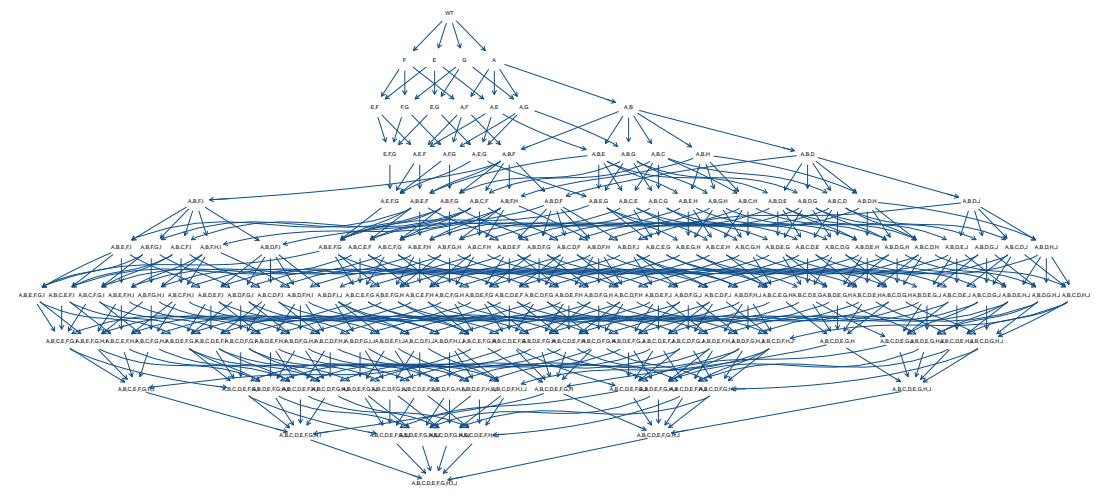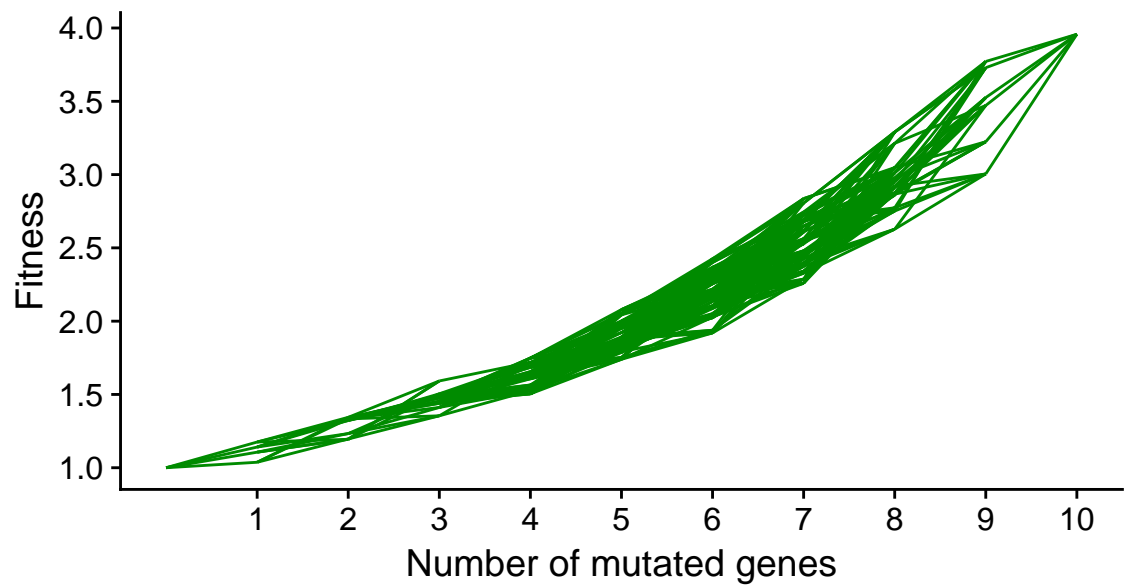

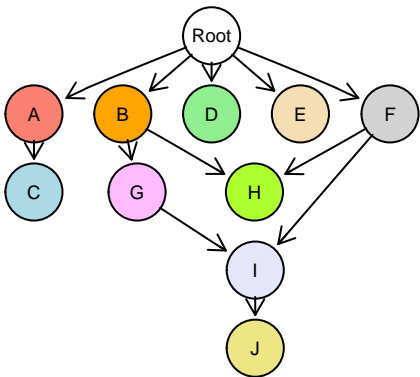

ID ITJu10YfirKtYzLt  
 acc genotypes 144  
 peaks no back 1  
 removed edges 0  
 prop rem edges 0

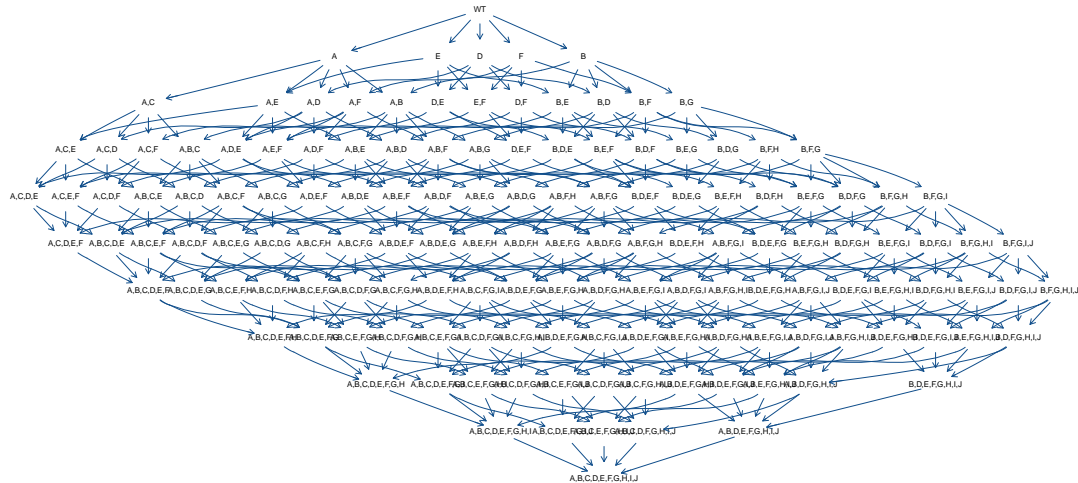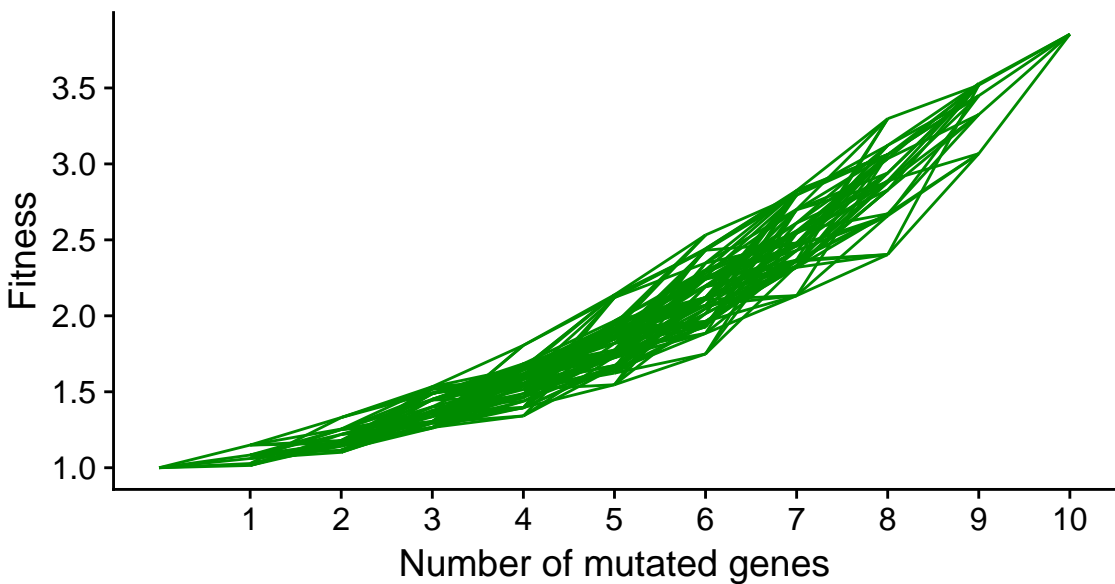

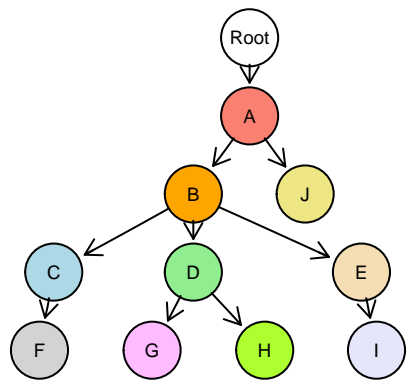

*ID*     **j5cMndnUwm51TTqp**  
*acc genotypes*     **93**  
*peaks no back*     **1**  
*removed edges*     **0**  
*prop rem edges*     **0**

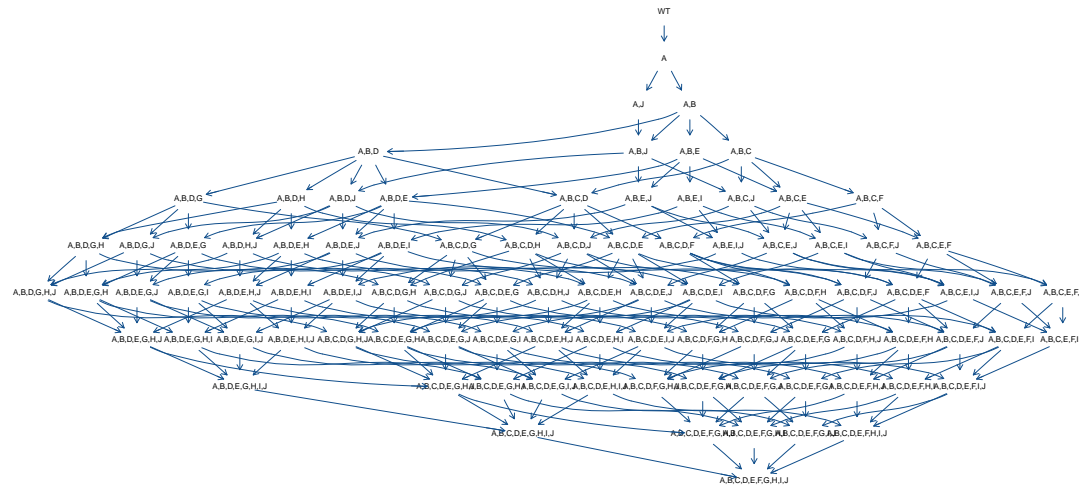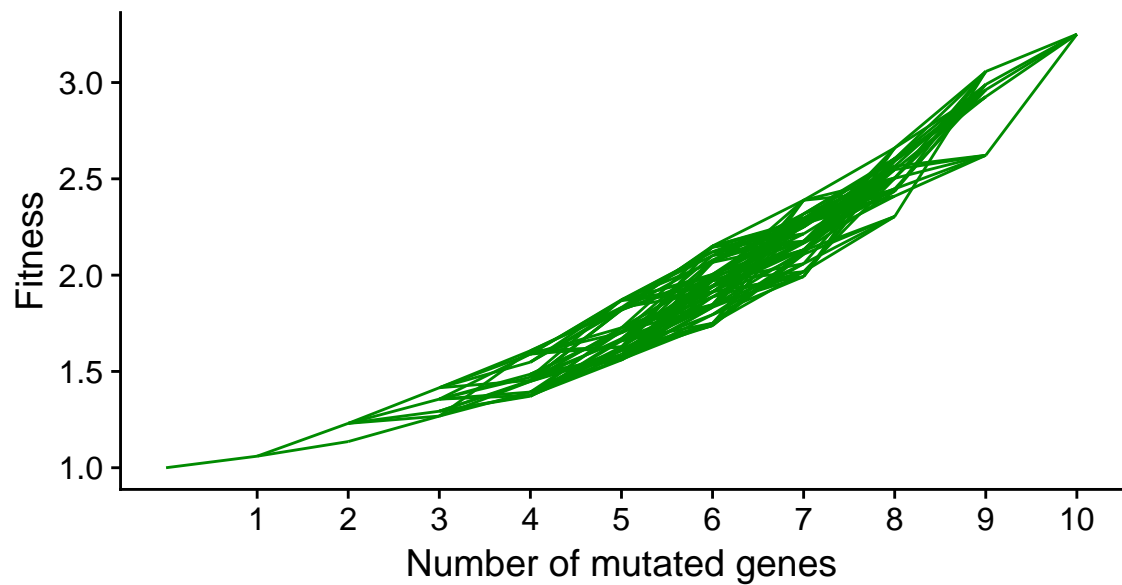

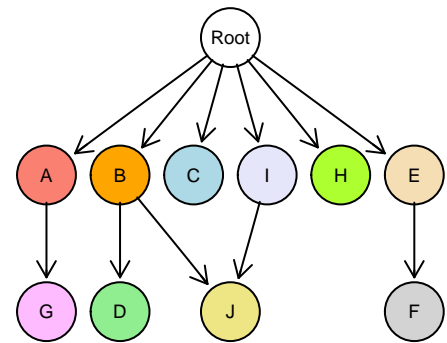

*ID*      **j6HW2RoAhJ2N68DN**  
*acc genotypes*    **288**  
*peaks no back*    1  
*removed edges*    0  
*prop rem edges*    0

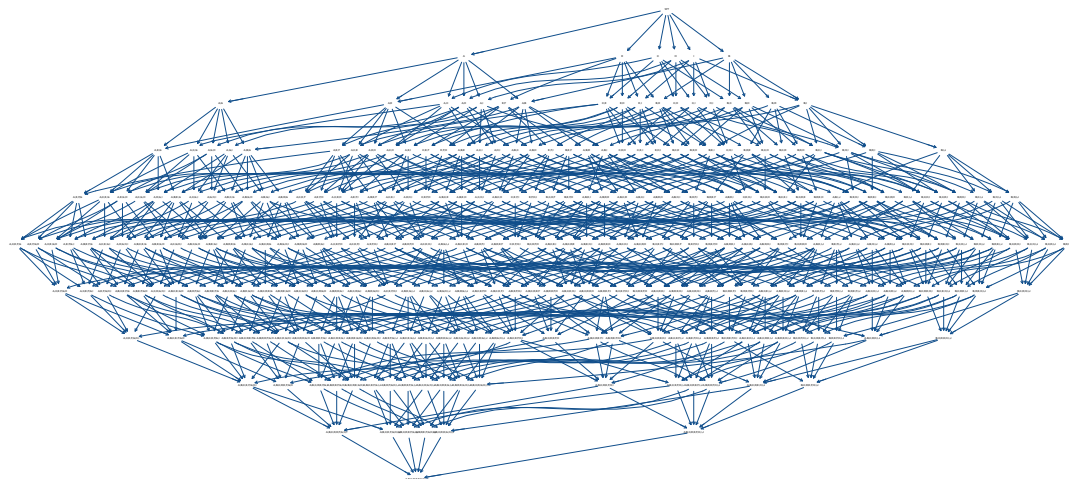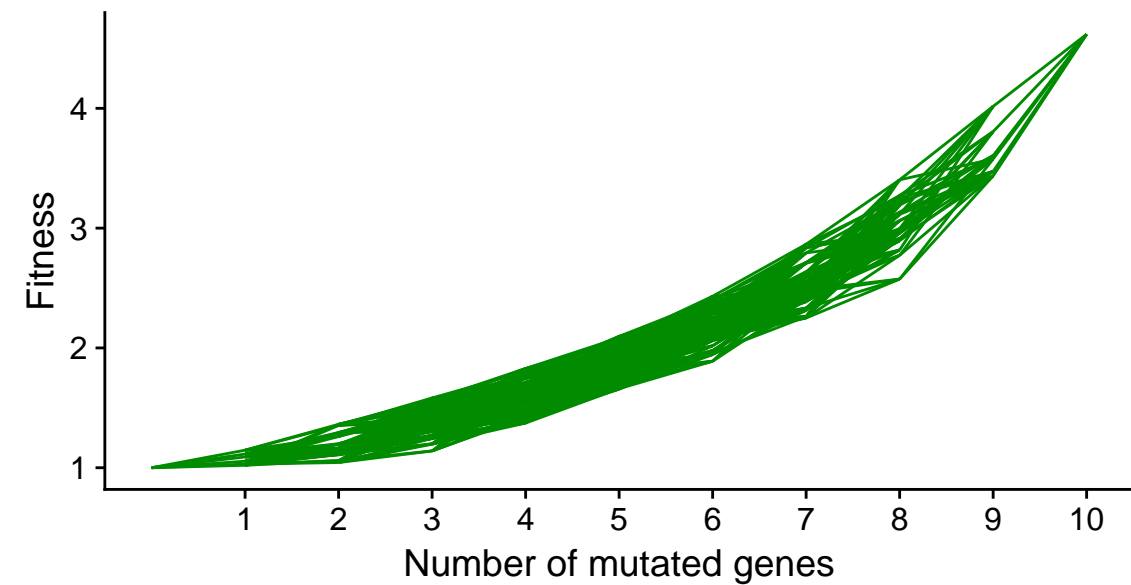

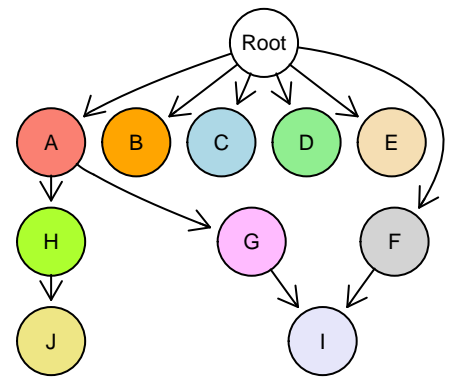

*ID* jAZ9fNKs3jEXePB4  
*acc genotypes* 272  
*peaks no back* 1  
*removed edges* 0  
*prop rem edges* 0

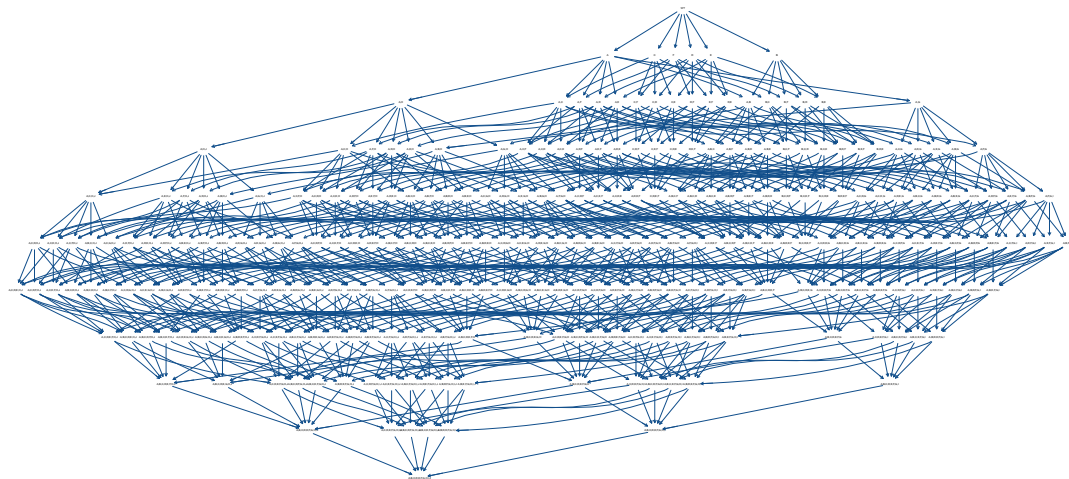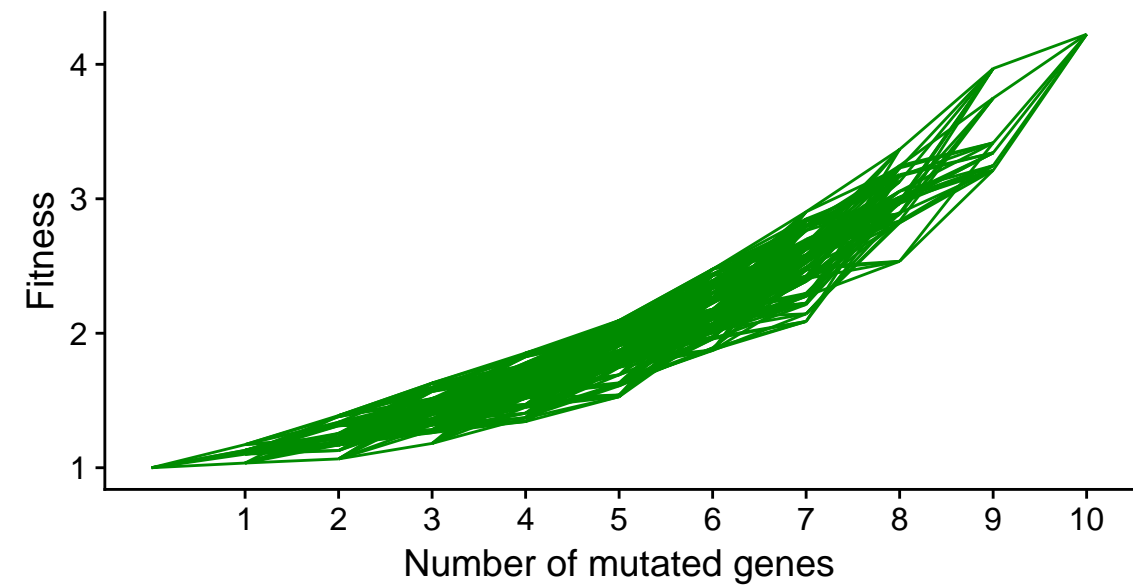



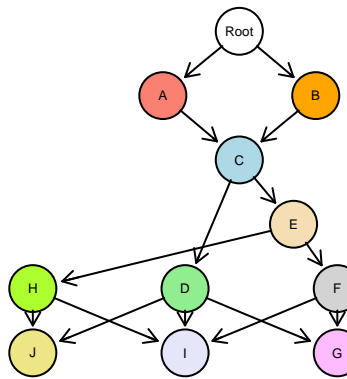

ID **jD4PcR3DEFwIK6qC**  
 acc genotypes **23**  
 peaks no back **1**  
 removed edges **0**  
 prop rem edges **0**

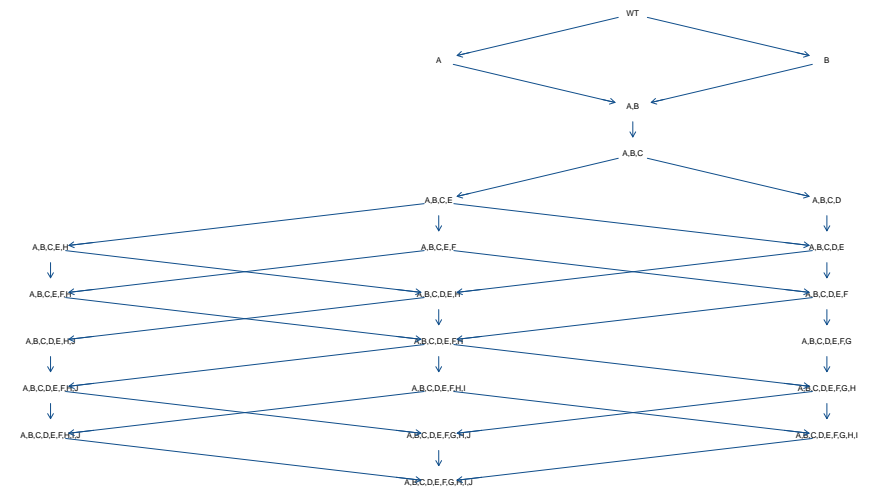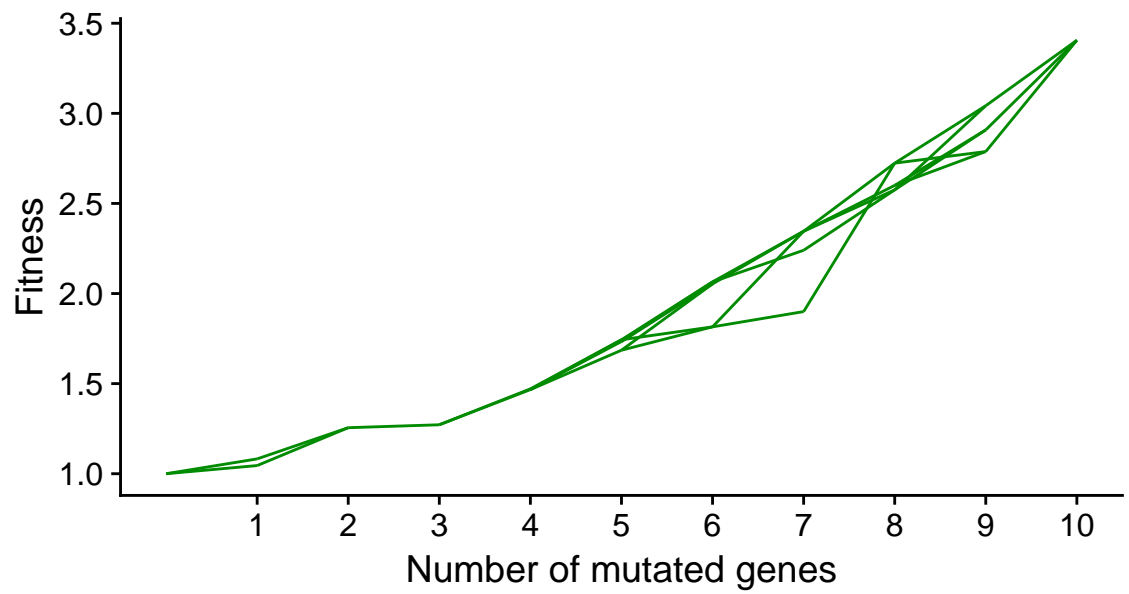

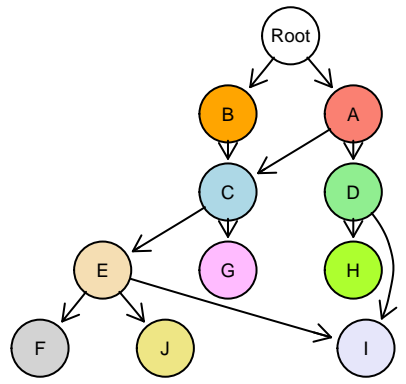

ID **Jh8glYdX10audNWWJF**  
 acc genotypes **54**  
 peaks no back 1  
 removed edges 0  
 prop rem edges 0

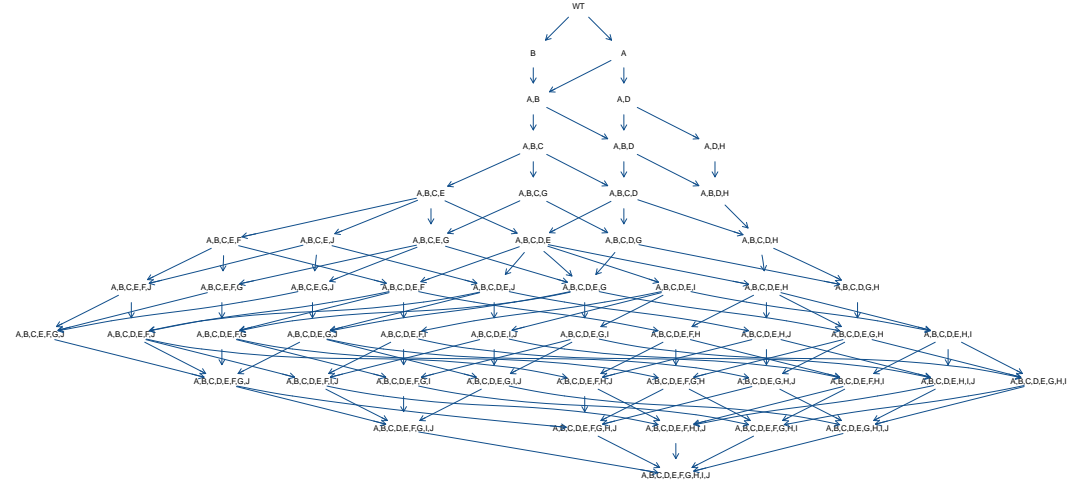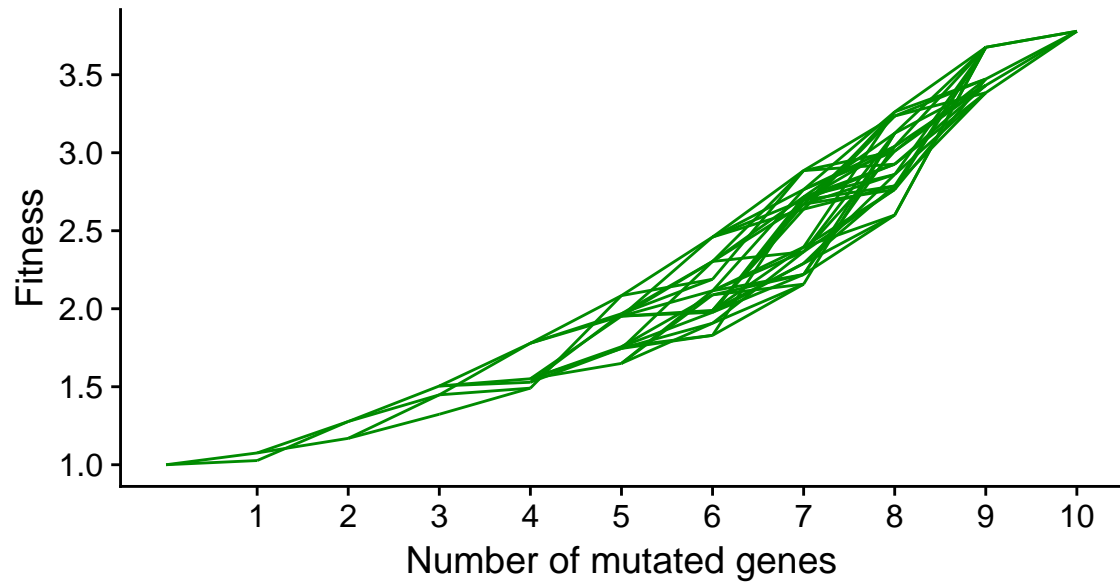

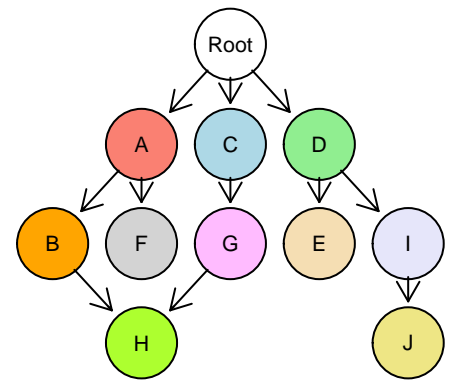

*ID* JhPPnqoKAJCL8pvR  
*acc genotypes* 119  
*peaks no back* 1  
*removed edges* 0  
*prop rem edges* 0

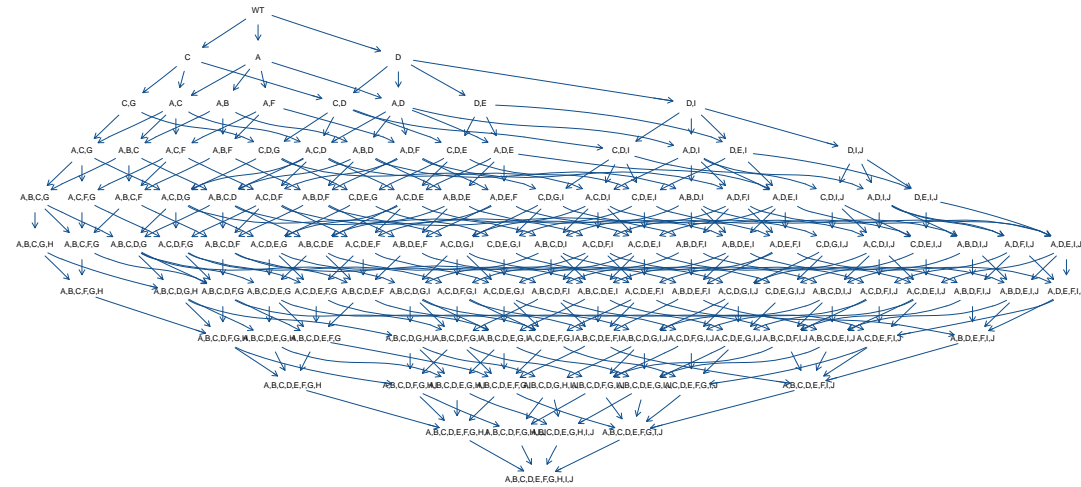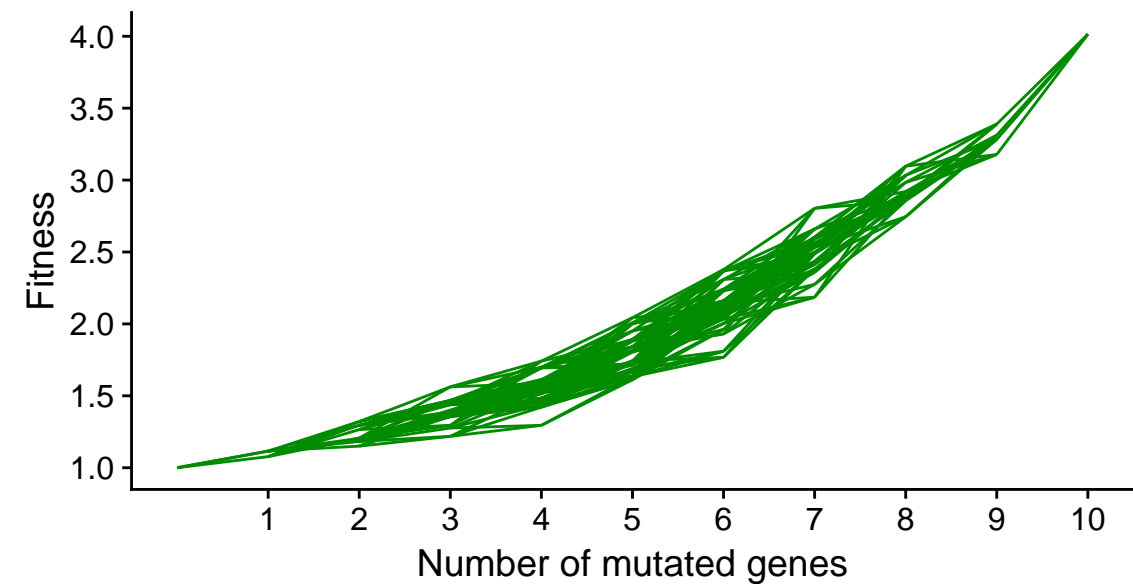

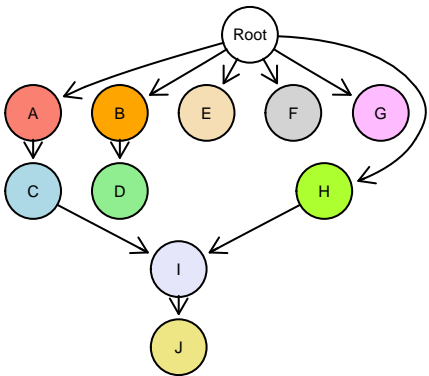

*ID* JIKf7ckdhSo6ArQQ  
*acc genotypes* 192  
*peaks no back* 1  
*removed edges* 0  
*prop rem edges* 0

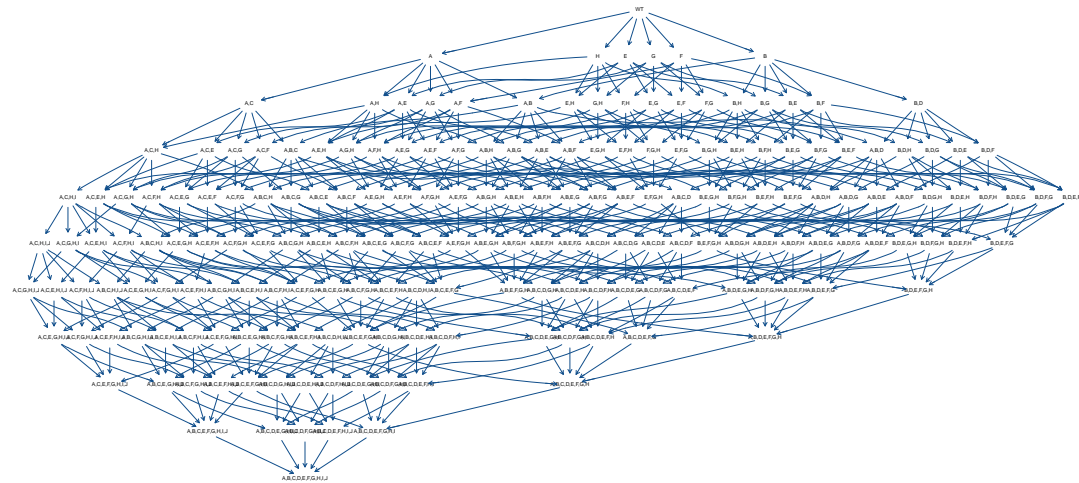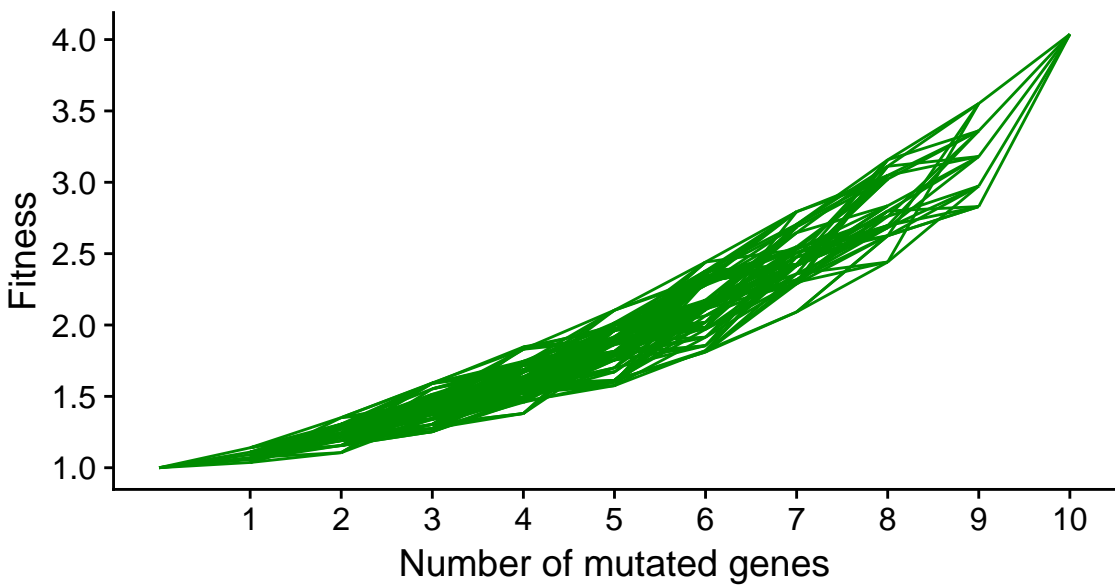

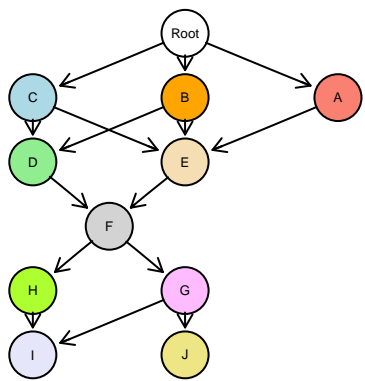

*ID* JoiUrrmmVqj67SyTm  
*acc genotypes* 20  
*peaks no back* 1  
*removed edges* 0  
*prop rem edges* 0

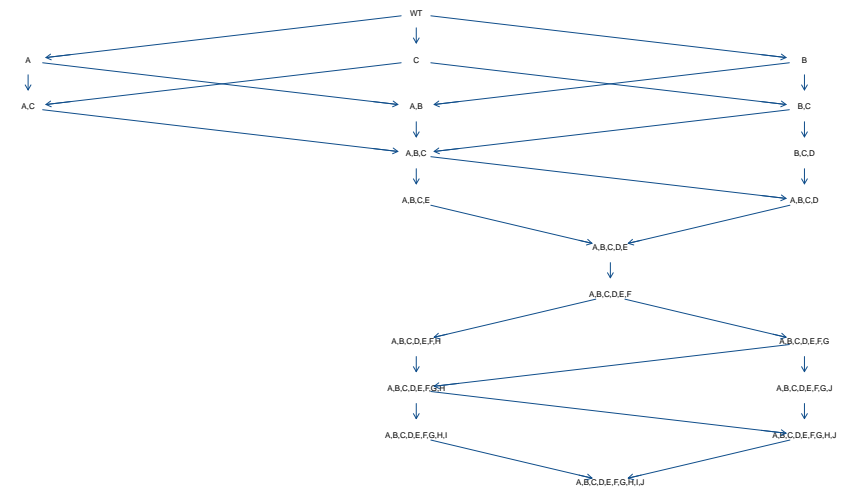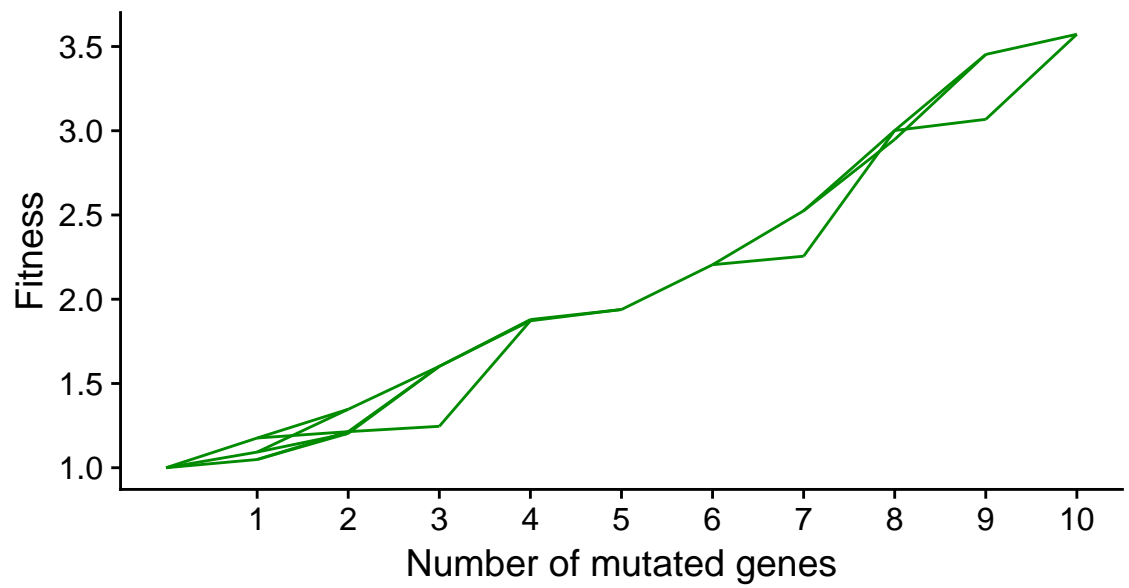

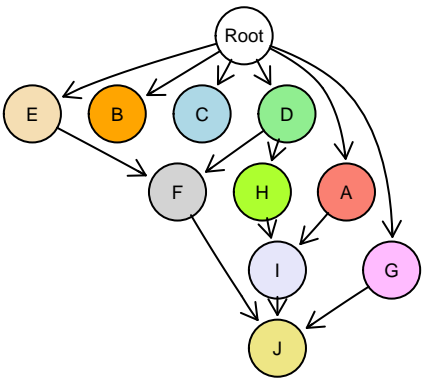

ID **jSQmuyLWDxqE106yj**  
 acc genotypes **156**  
 peaks no back **1**  
 removed edges **0**  
 prop rem edges **0**

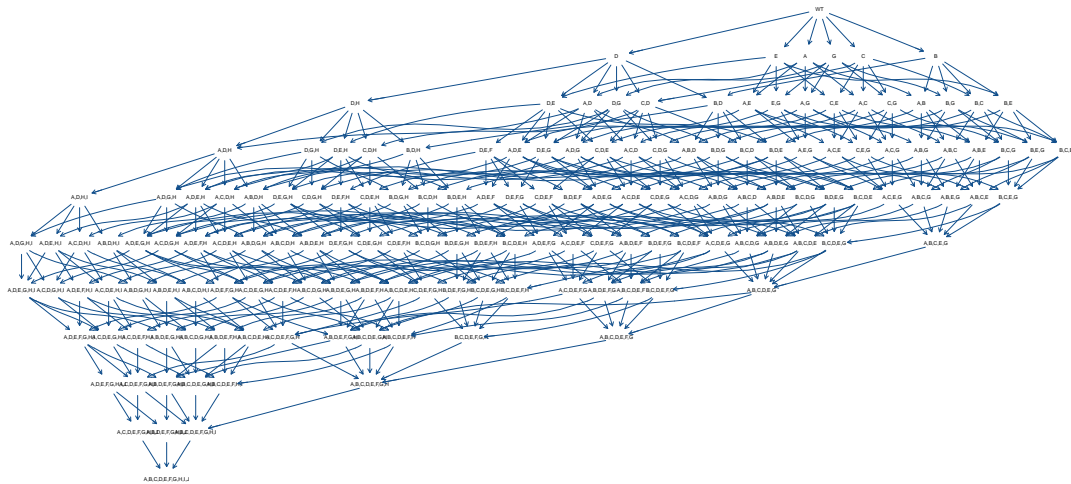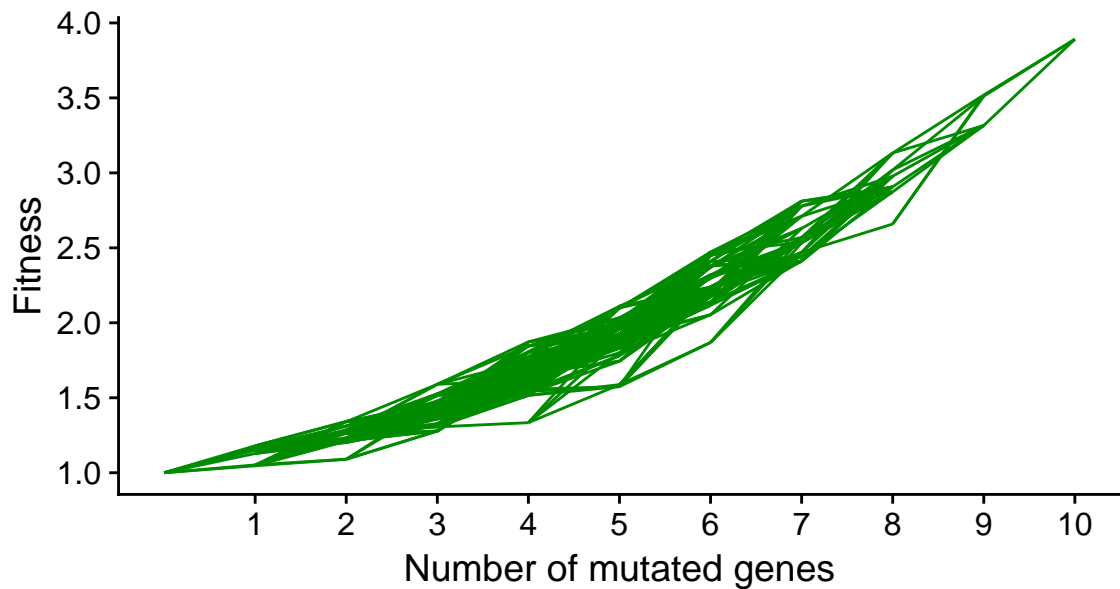

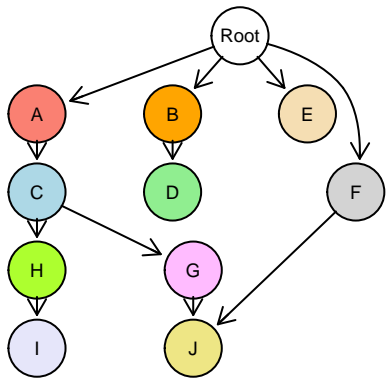

*ID* jXDzA3wcvwQmXJvD  
*acc genotypes* 114  
*peaks no back* 1  
*removed edges* 0  
*prop rem edges* 0

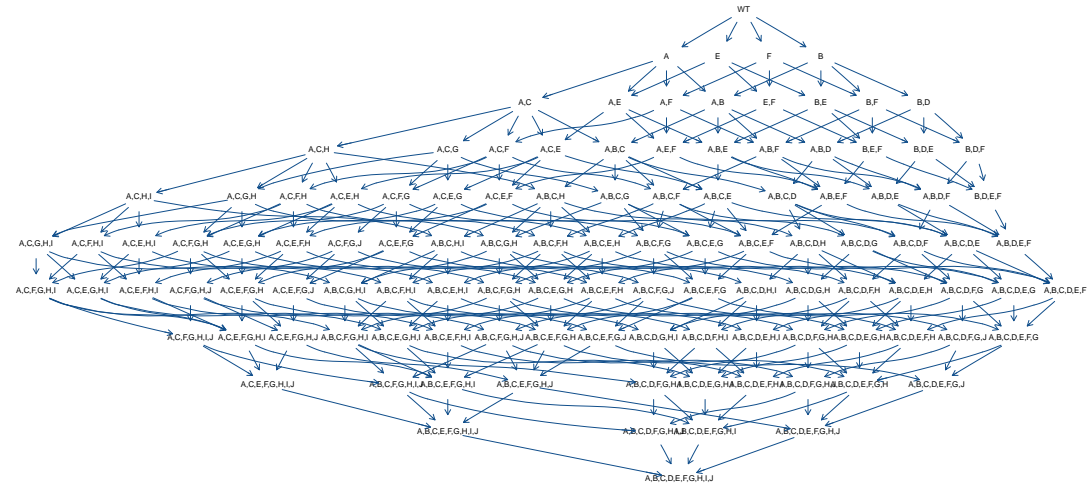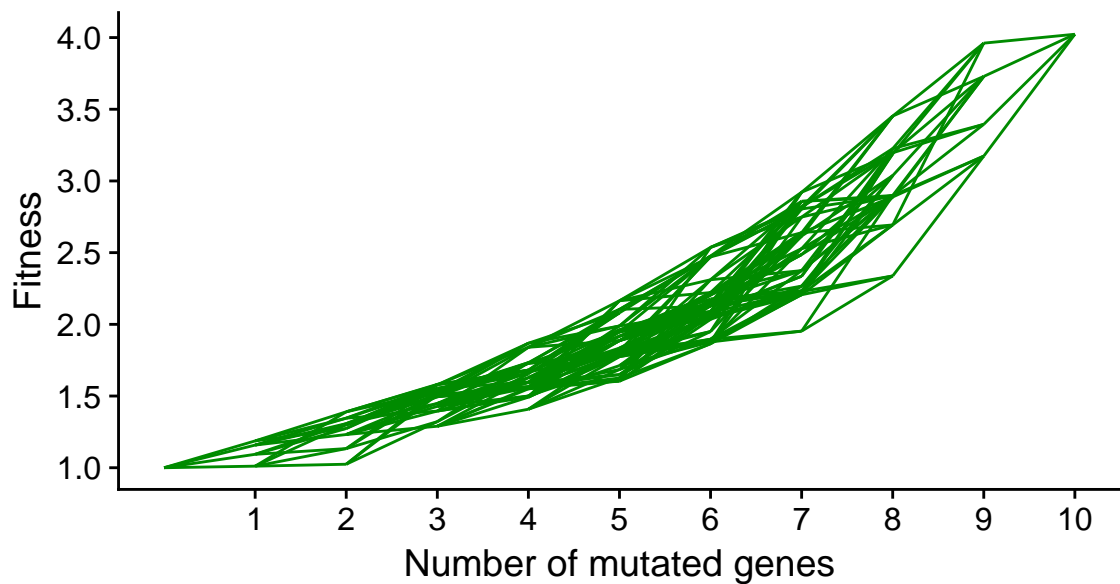

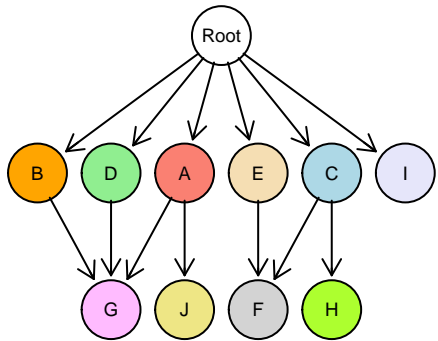

ID **K1JCHK7t4zCUPD6B**  
 acc genotypes **224**  
 peaks no back 1  
 removed edges 0  
 prop rem edges 0

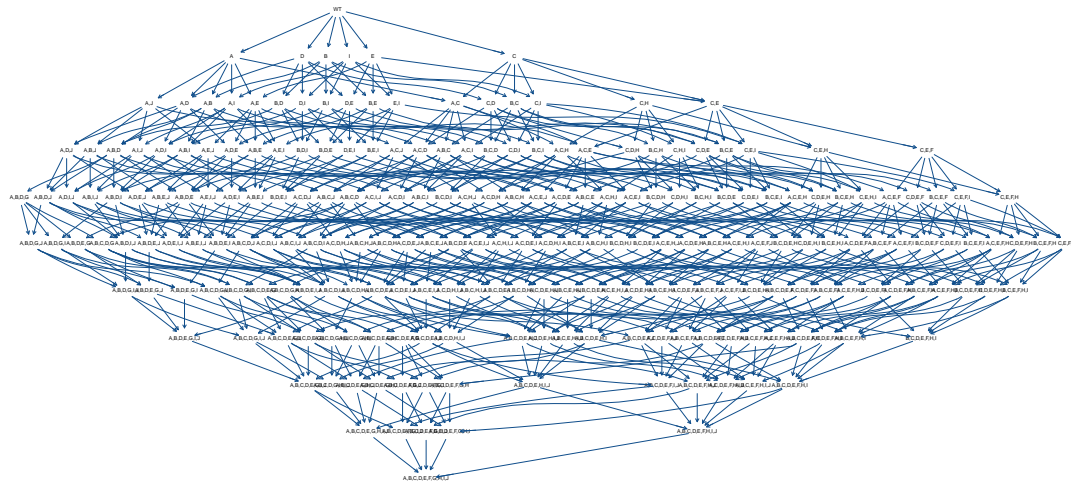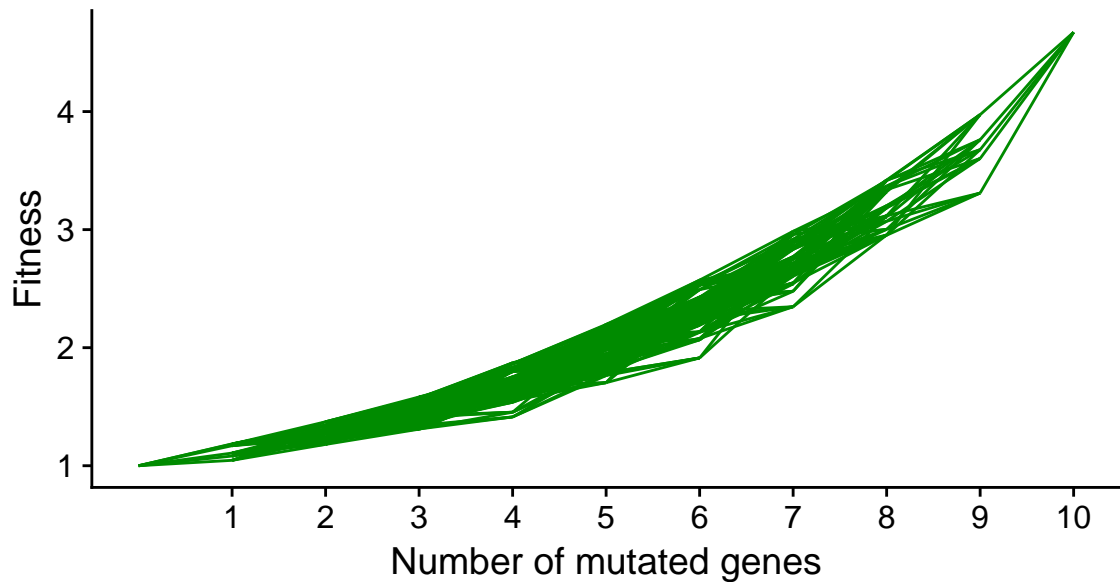



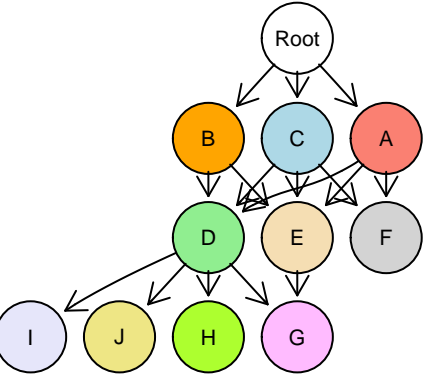

ID **KkQL102YepOiao9Bb**  
acc genotypes **60**  
peaks no back **1**  
removed edges **0**  
prop rem edges **0**

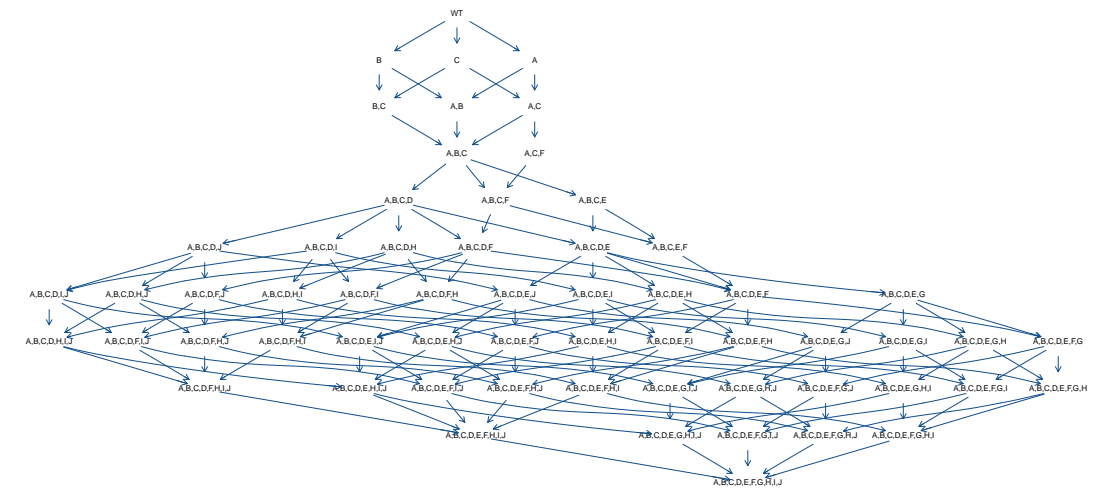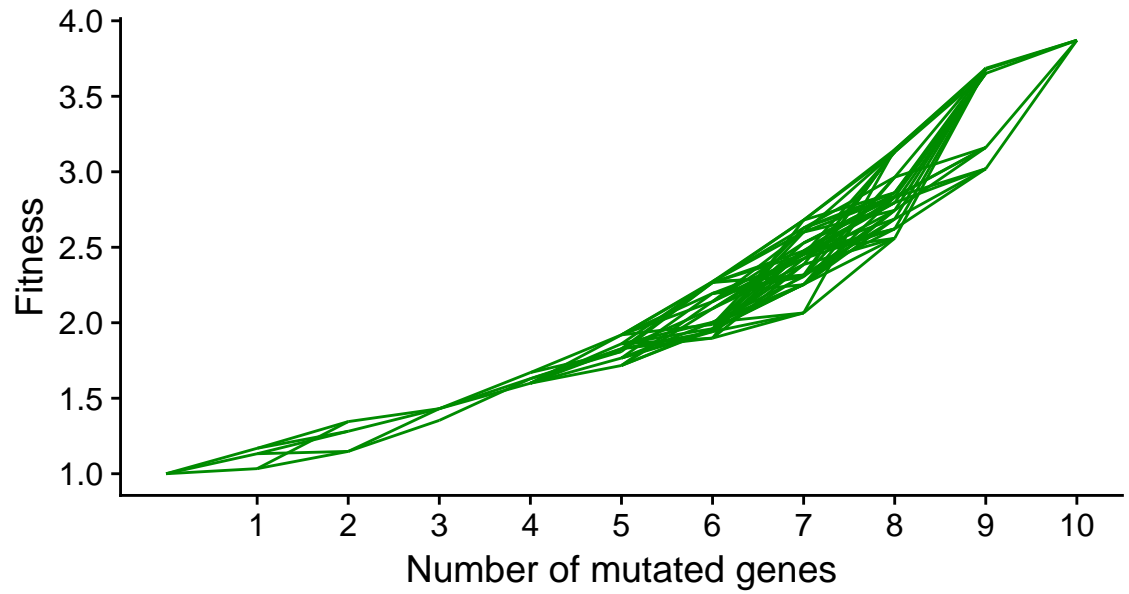

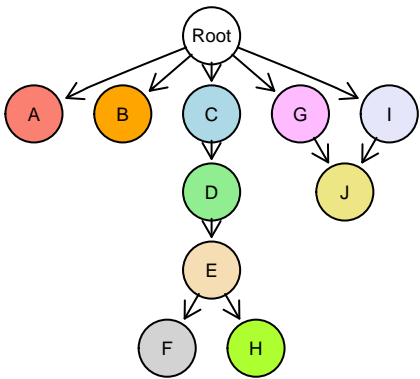

*ID* kpRFNq2Q10Ex8oSMG  
*acc genotypes* 140  
*peaks no back* 1  
*removed edges* 0  
*prop rem edges* 0

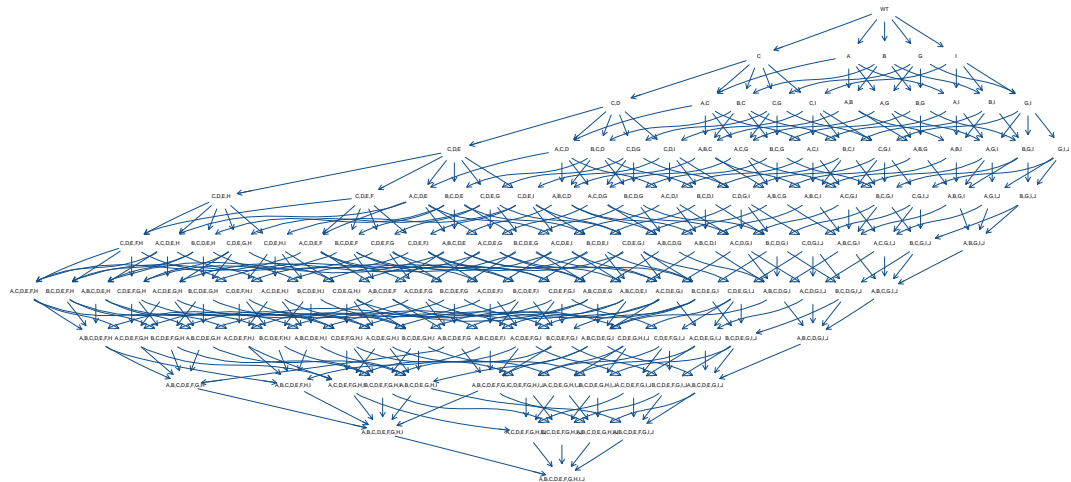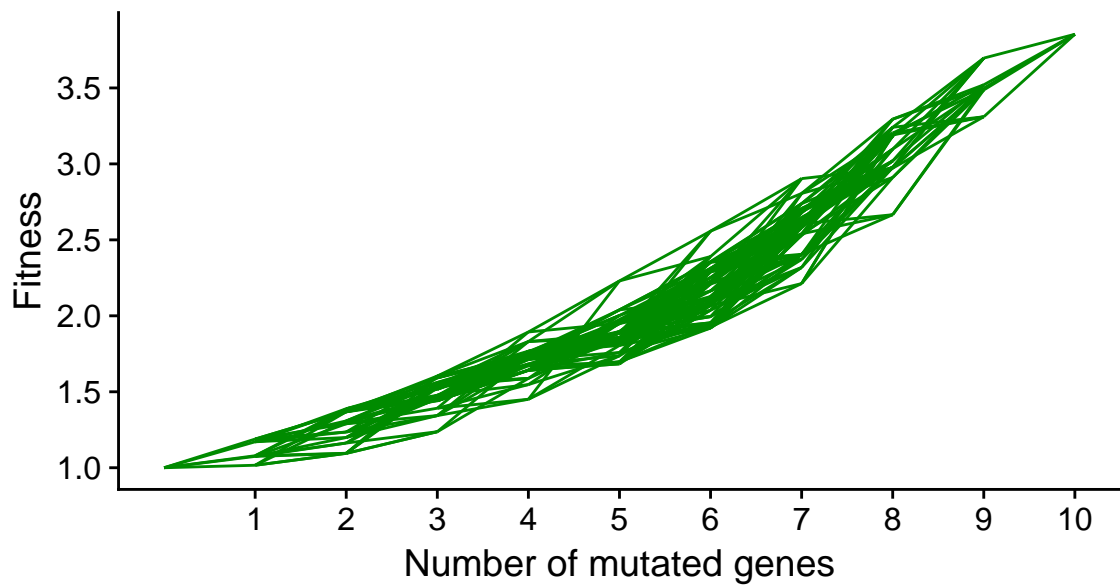

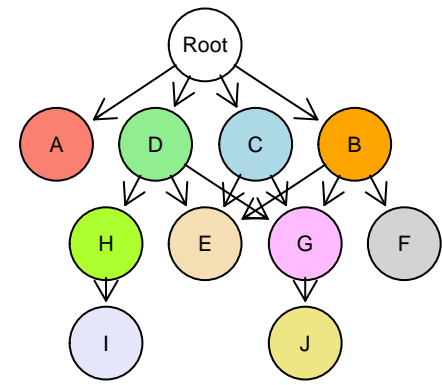

*ID* ktOHeXaq4zp10UQNO  
*acc genotypes* 108  
*peaks no back* 1  
*removed edges* 0  
*prop rem edges* 0

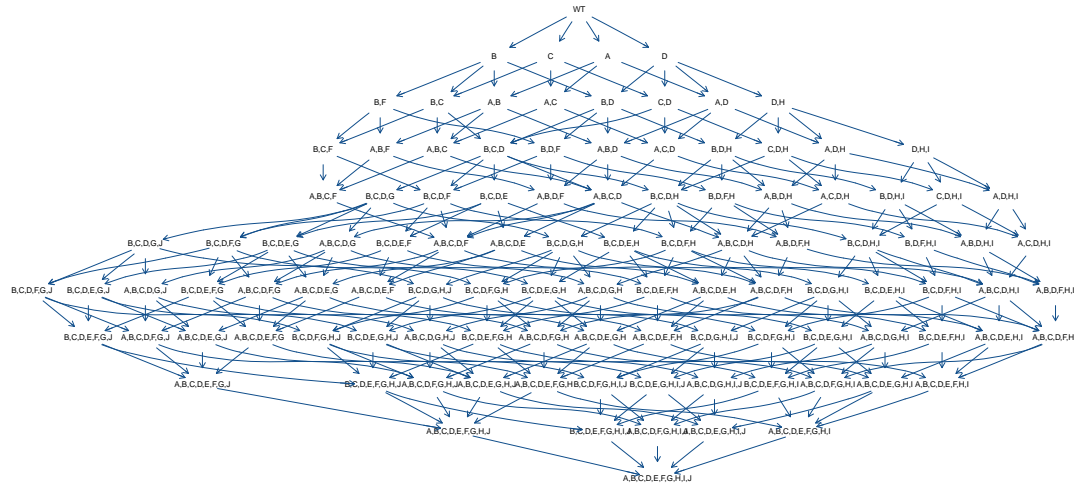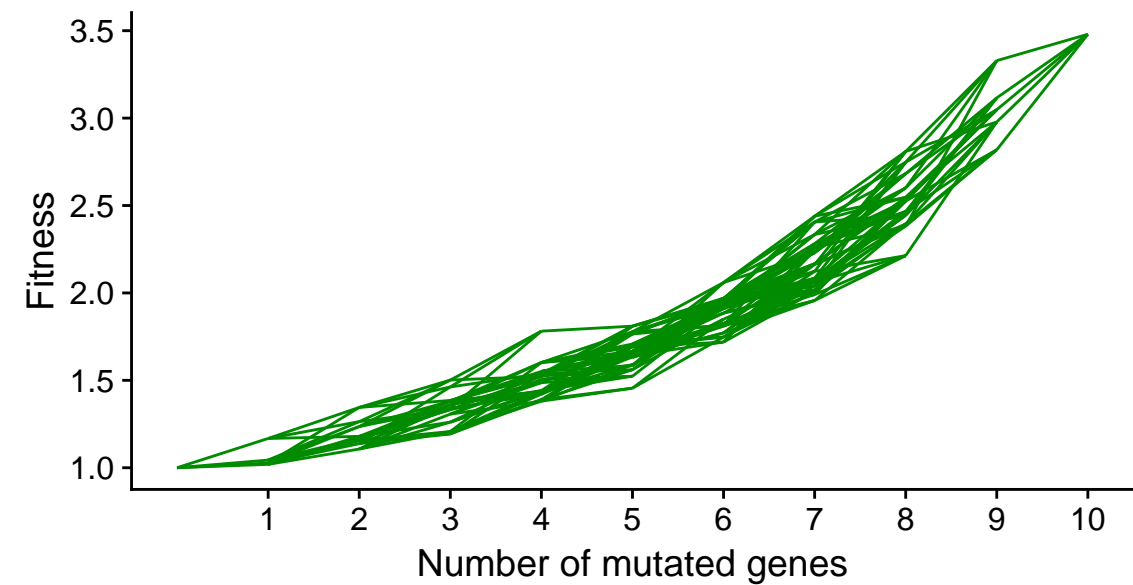

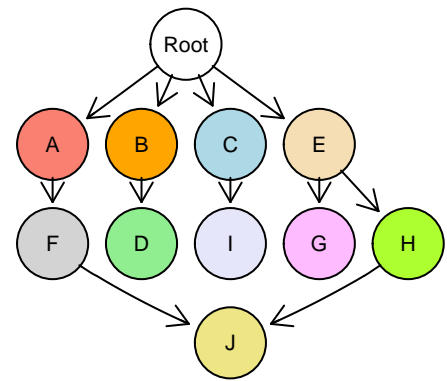

*ID* kvDLqWZKOAz5w43U  
*acc genotypes* 153  
*peaks no back* 1  
*removed edges* 0  
*prop rem edges* 0

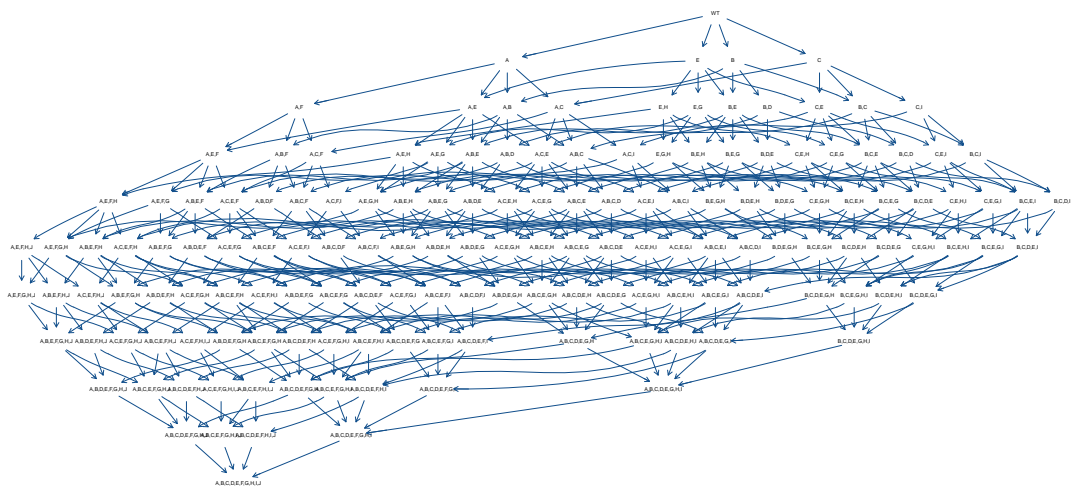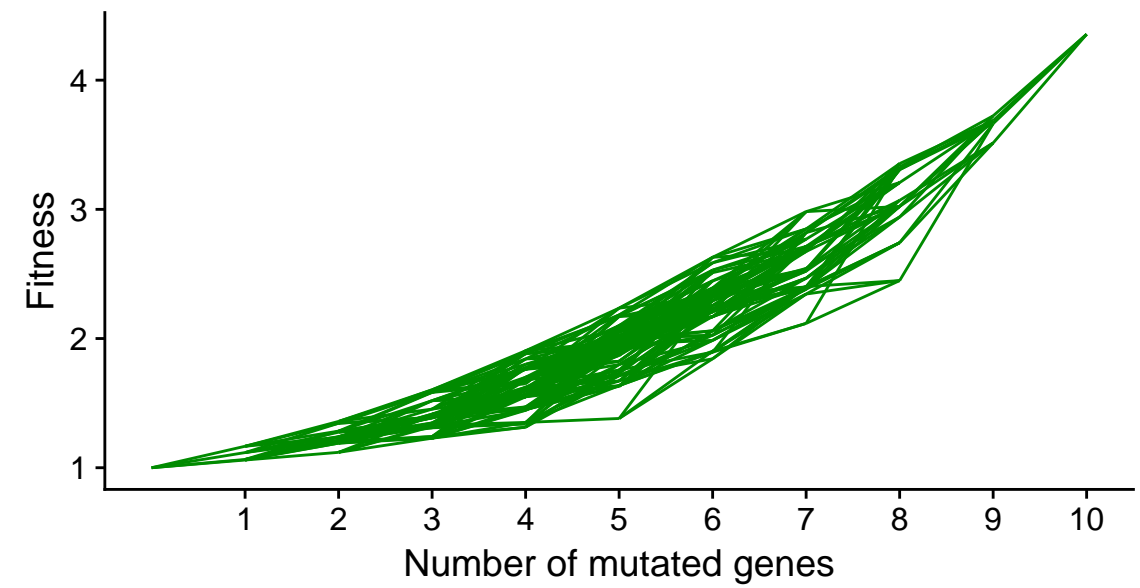

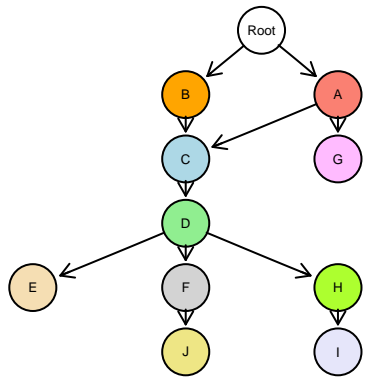

ID L*A*waf4n74KilOZv  
 acc genotypes 44  
 peaks no back 1  
 removed edges 0  
 prop rem edges 0

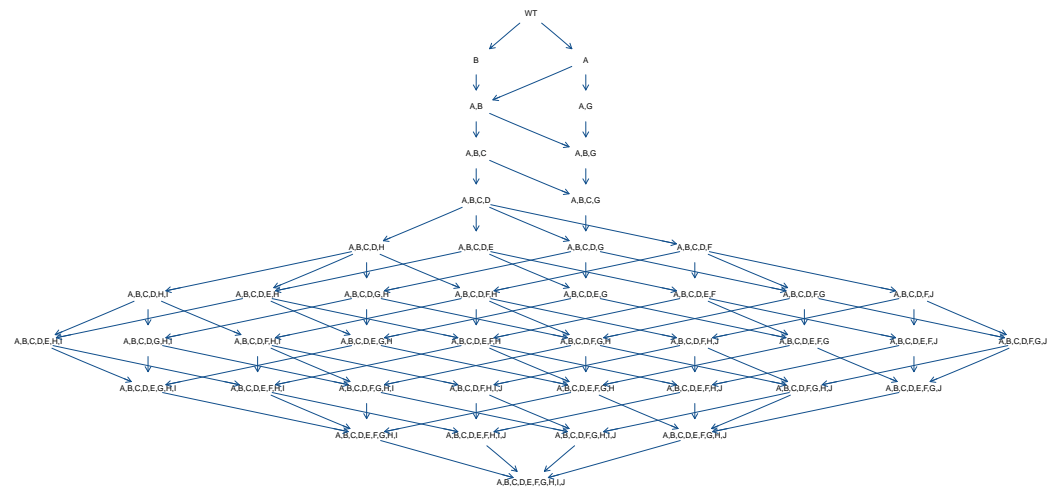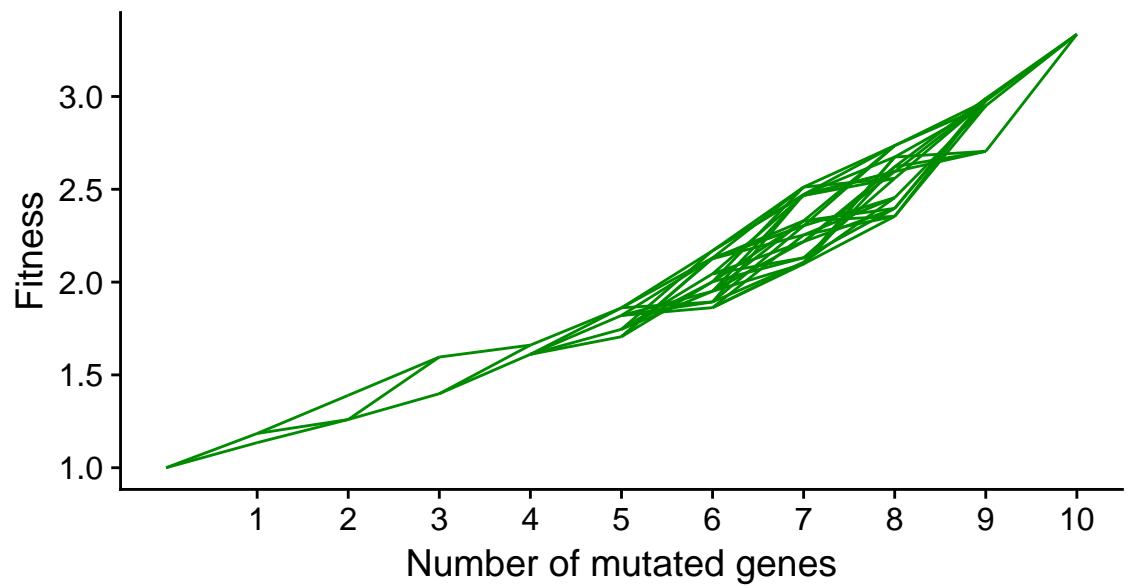

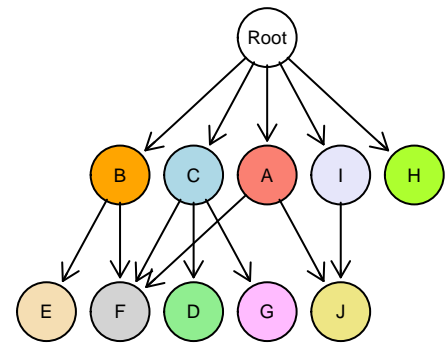

*ID* LgHU63NzyxJ8cVAR  
*acc genotypes* 198  
*peaks no back* 1  
*removed edges* 0  
*prop rem edges* 0

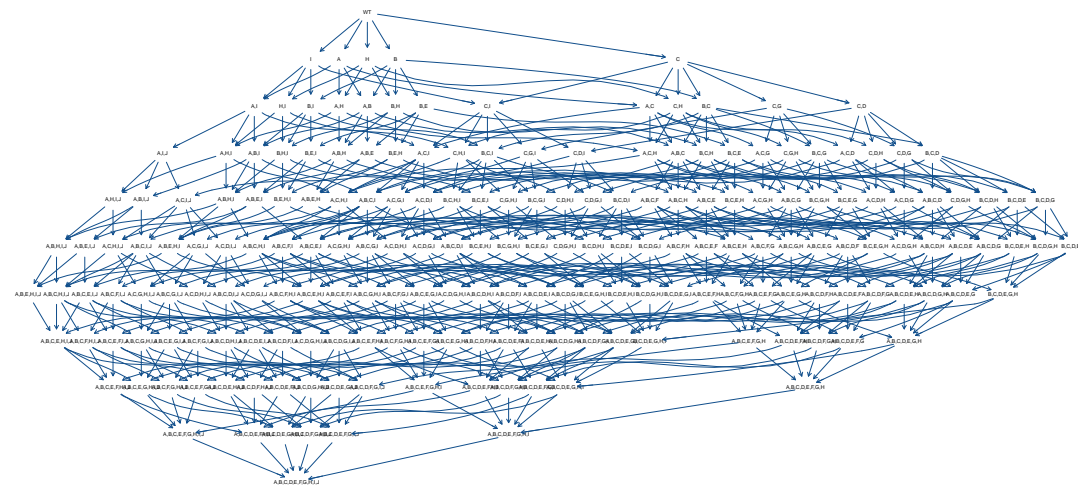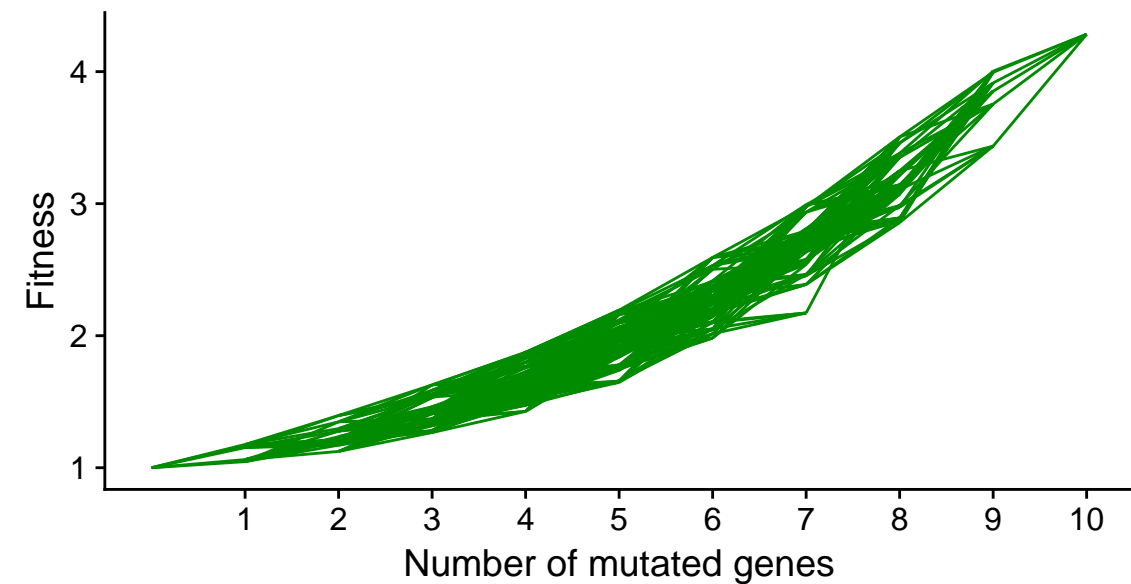

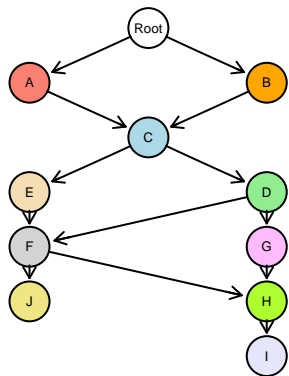

*ID* IIOath10wN5BQcye  
*acc genotypes* 18  
*peaks no back* 1  
*removed edges* 0  
*prop rem edges* 0

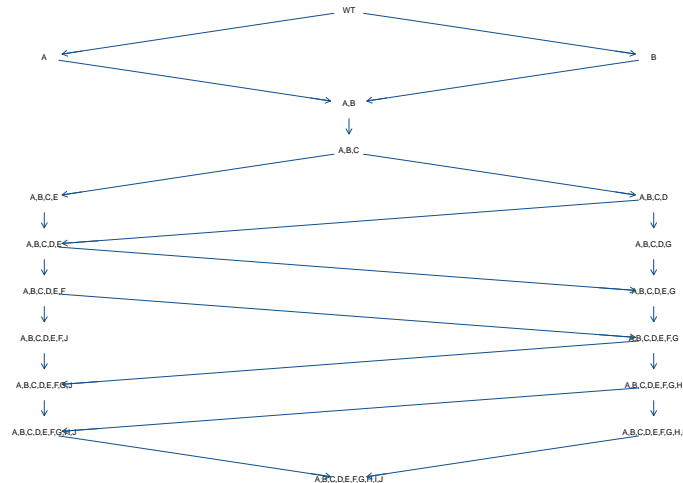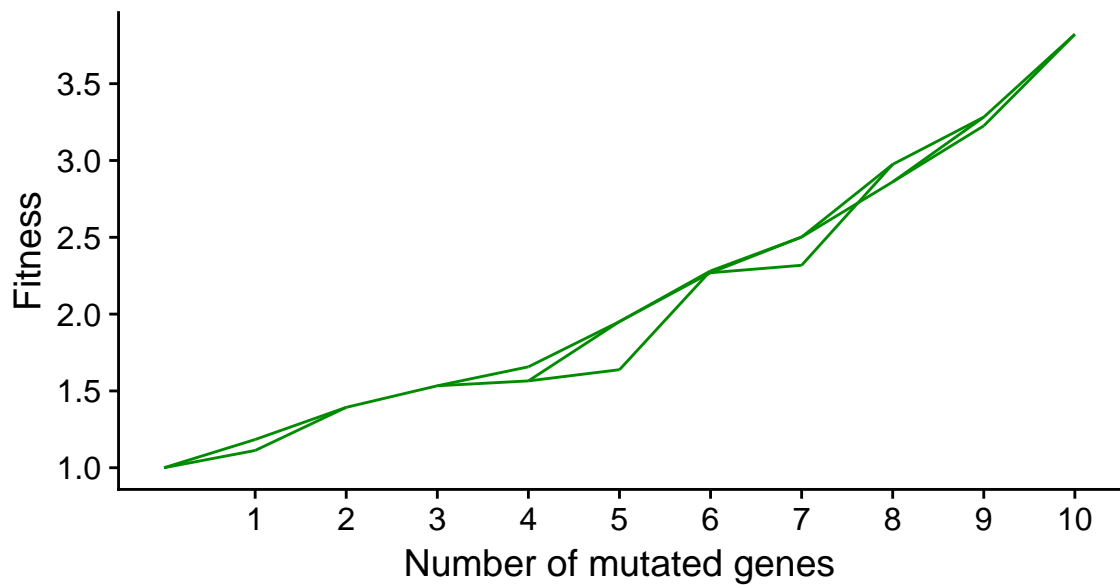

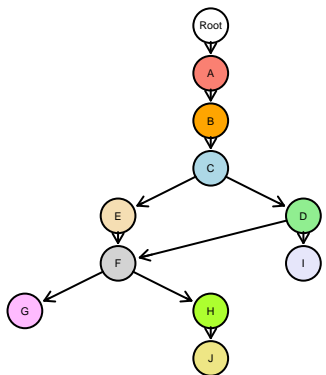

ID LiqVyEk5185gj87  
 acc genotypes 21  
 peaks no back 1  
 removed edges 0  
 prop rem edges 0

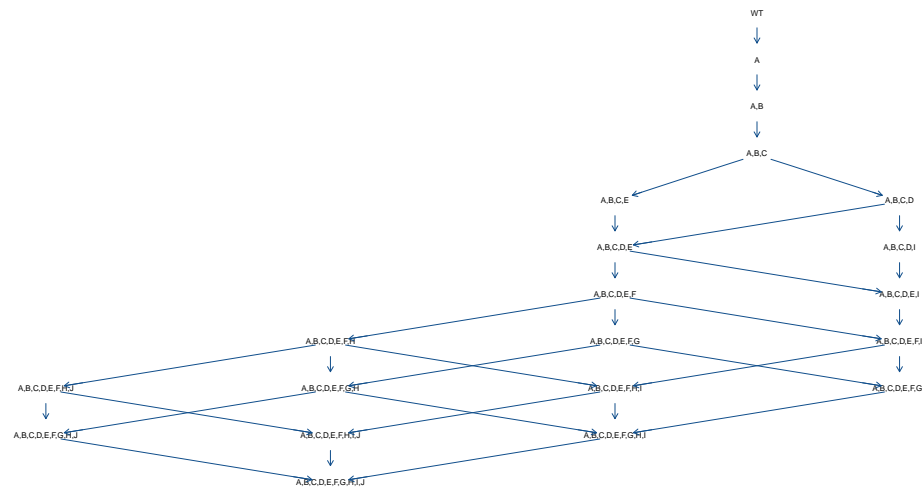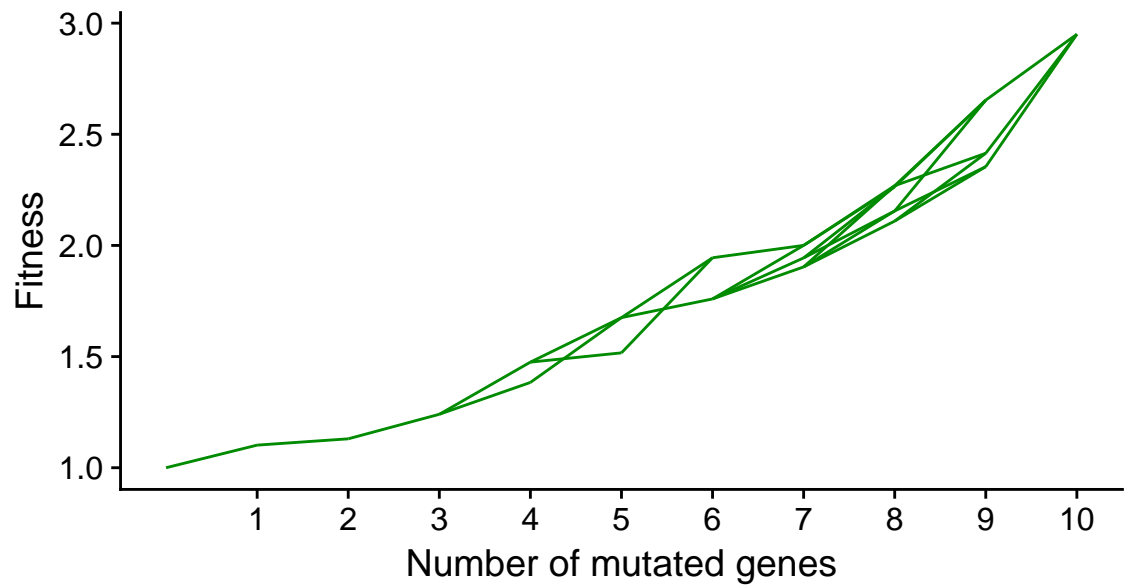



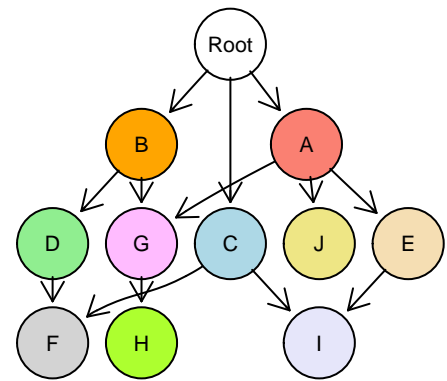

*ID* IJ3M9zaA46iBzYO2  
*acc genotypes* 95  
*peaks no back* 1  
*removed edges* 0  
*prop rem edges* 0

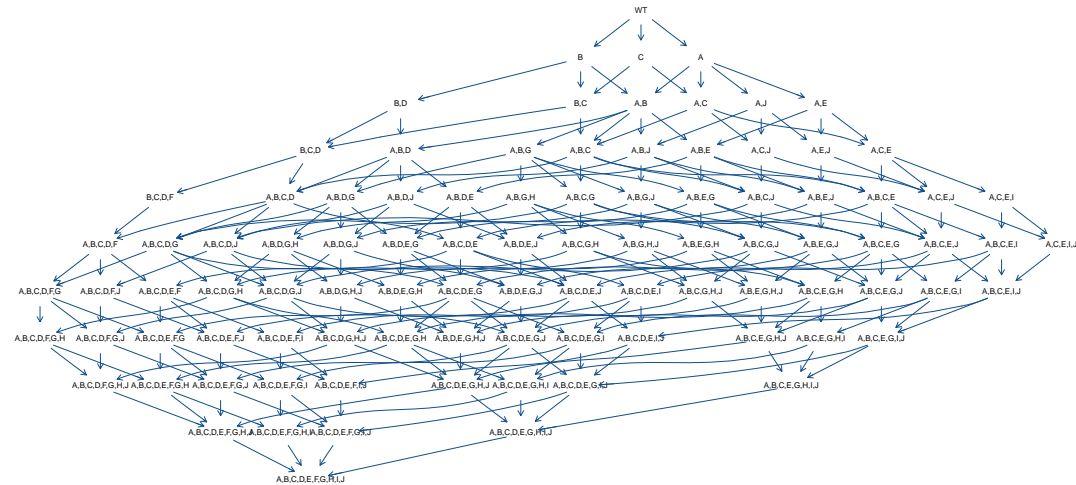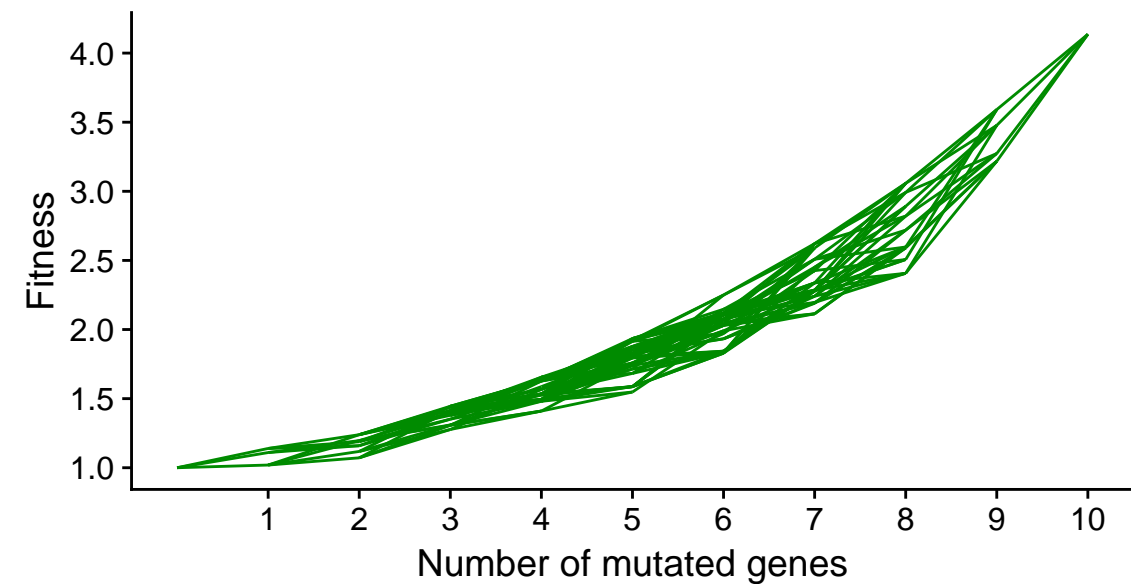

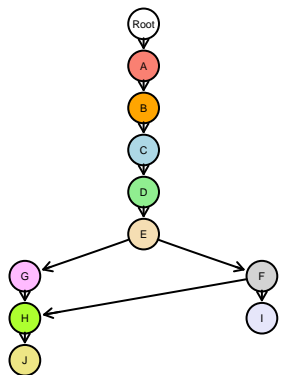

*ID* LKzTjEtauR10FkWvl  
*acc genotypes* 15  
*peaks no back* 1  
*removed edges* 0  
*prop rem edges* 0

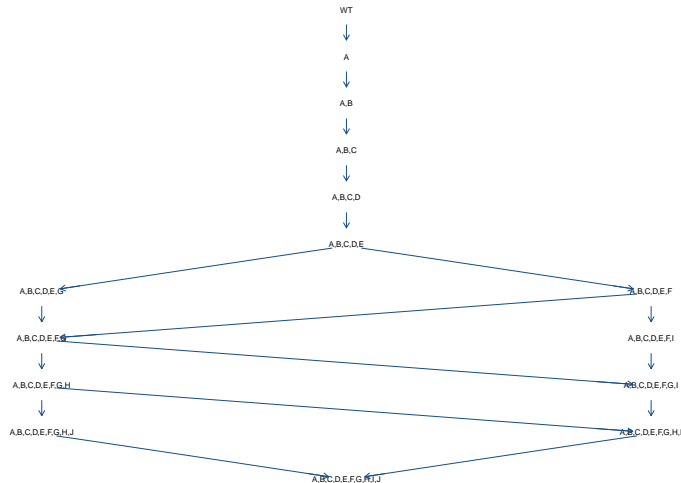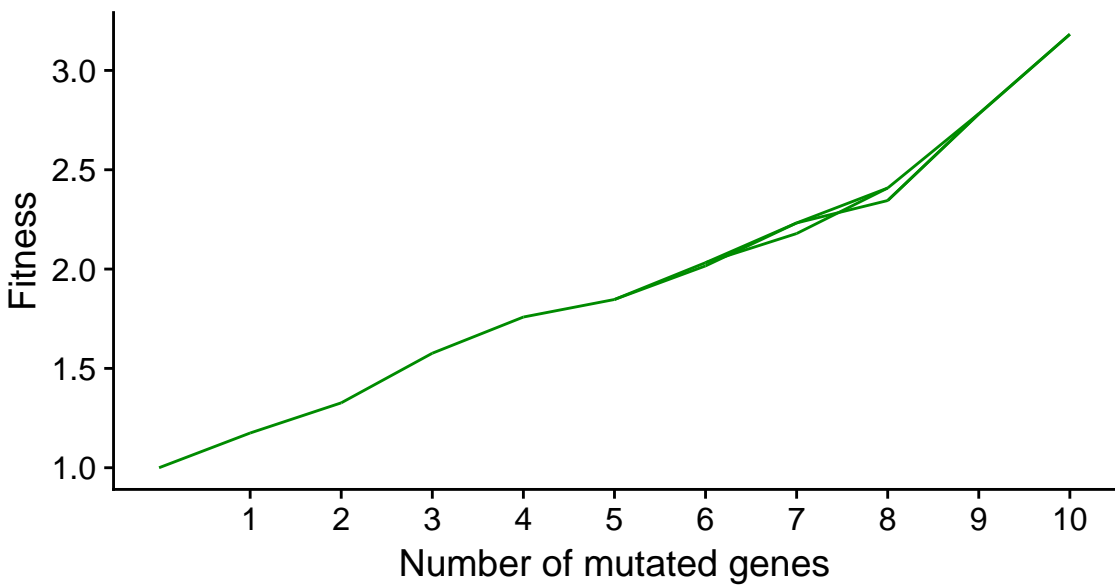

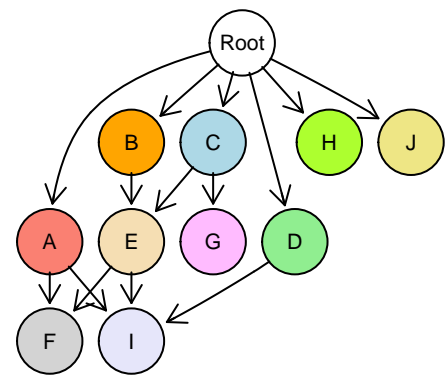

*ID* LLARXmNmlvPm7fLH  
*acc genotypes* 160  
*peaks no back* 1  
*removed edges* 0  
*prop rem edges* 0

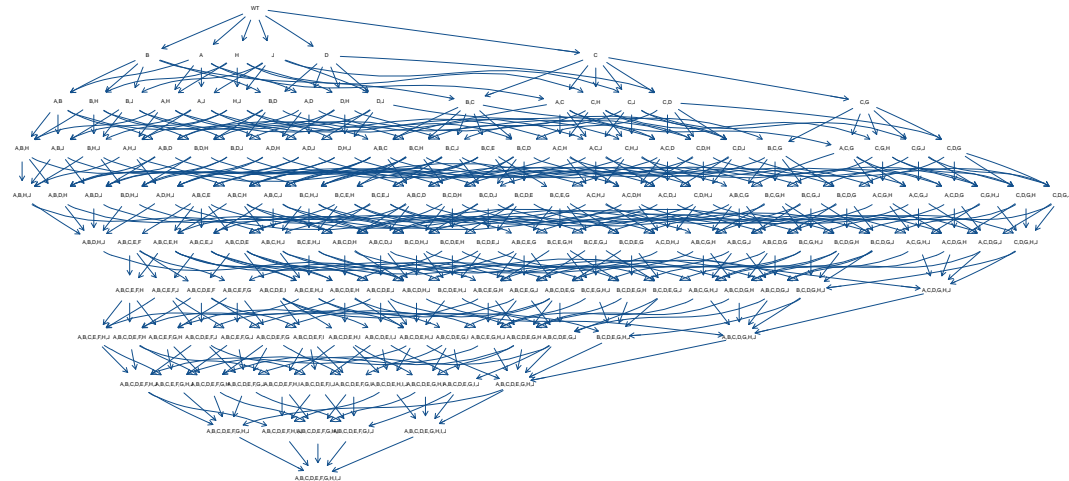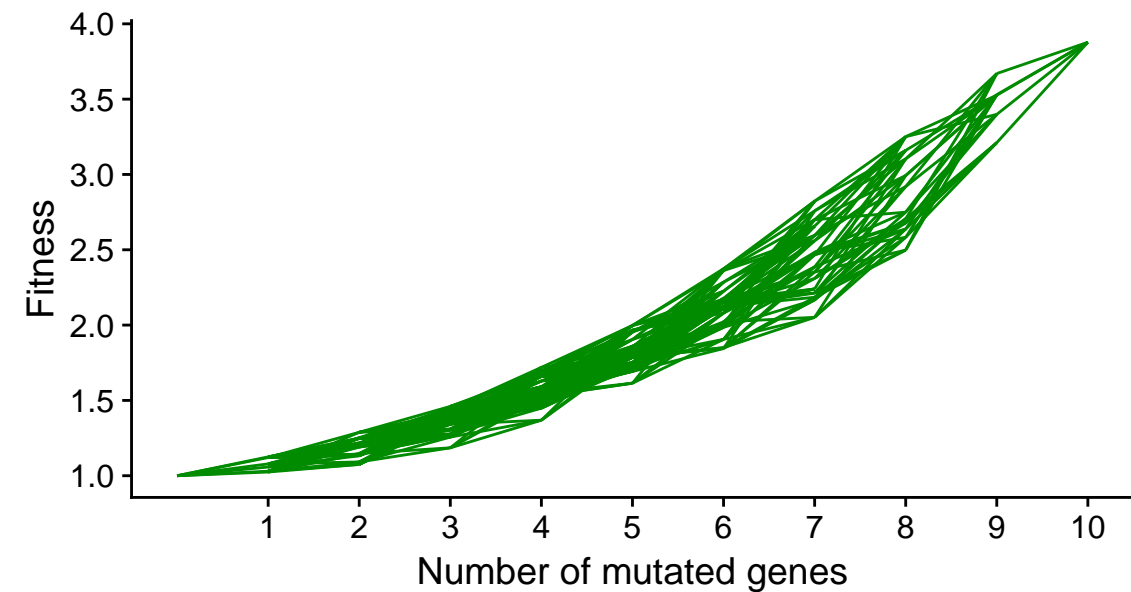

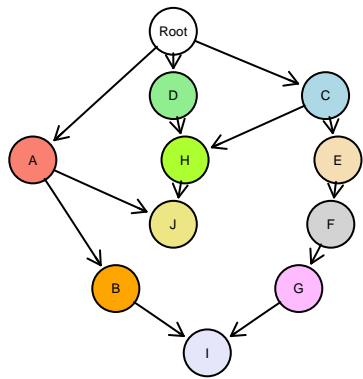

ID **LoVQjzyAttkUHwB8**  
 acc genotypes **54**  
 peaks no back **1**  
 removed edges **0**  
 prop rem edges **0**

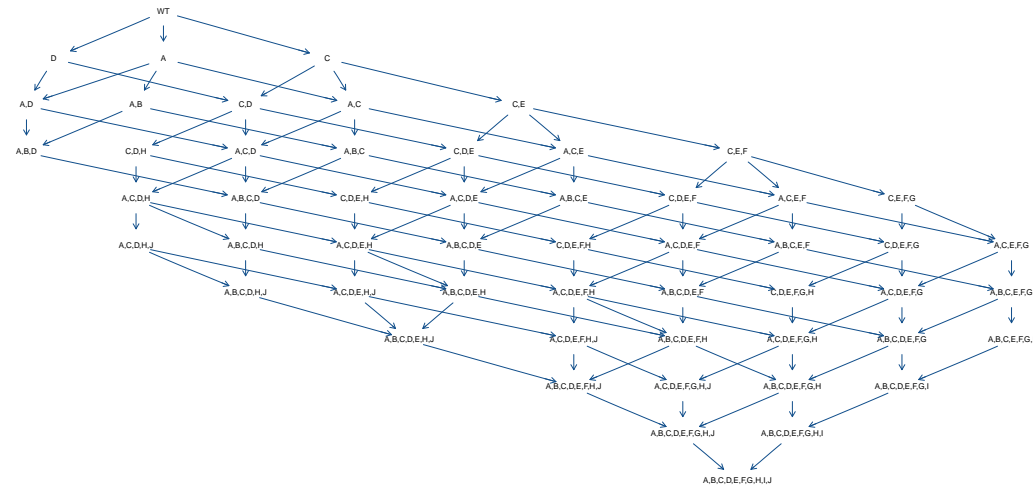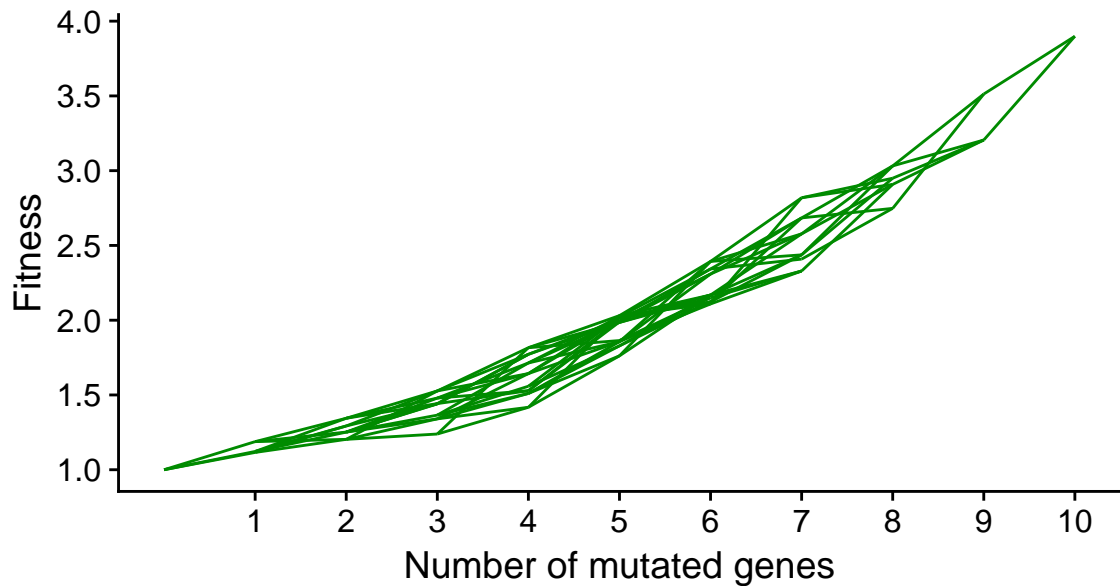

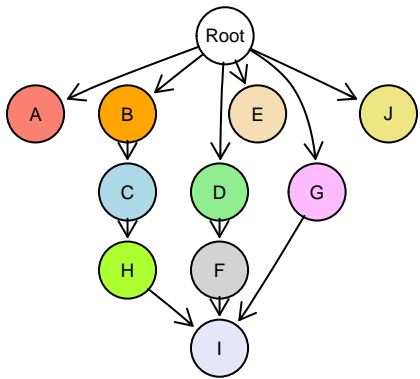

ID **m2LJE5DdVSyhA9R9**  
 acc genotypes **200**  
 peaks no back **1**  
 removed edges **0**  
 prop rem edges **0**

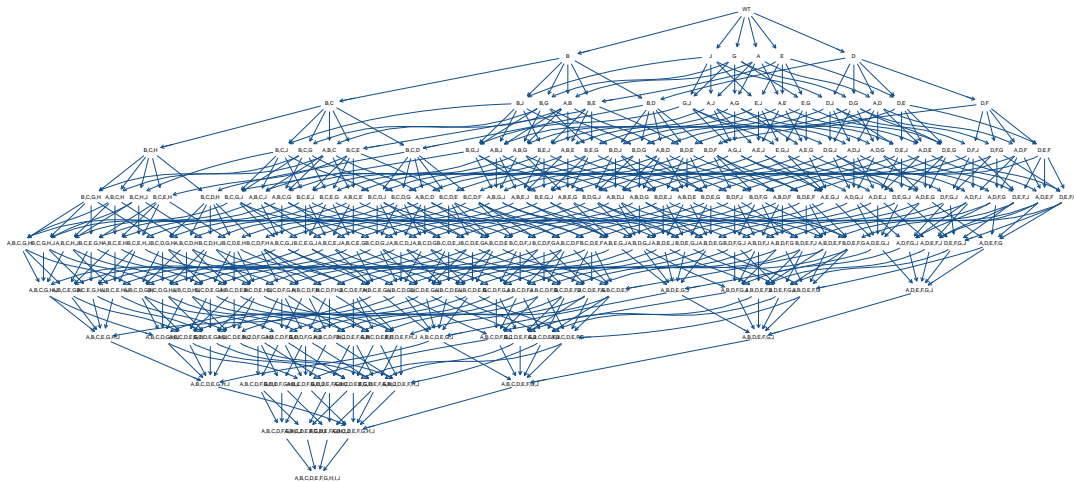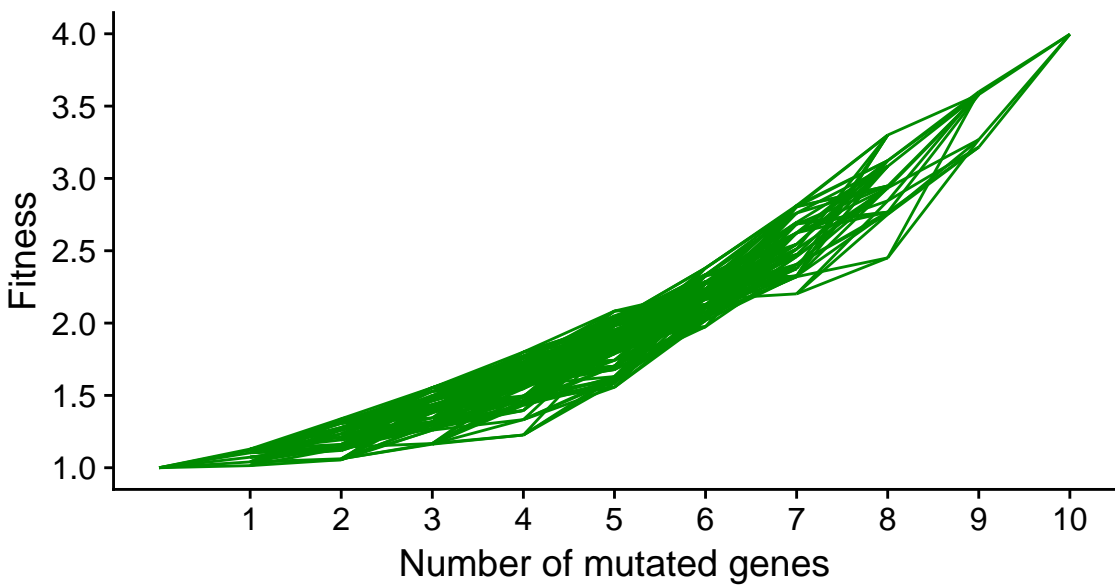

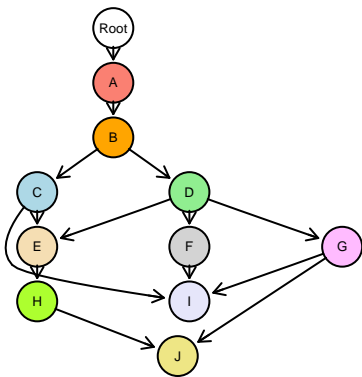

ID M5NjxUHUHAKU7nQF  
 acc genotypes 26  
 peaks no back 1  
 removed edges 0  
 prop rem edges 0

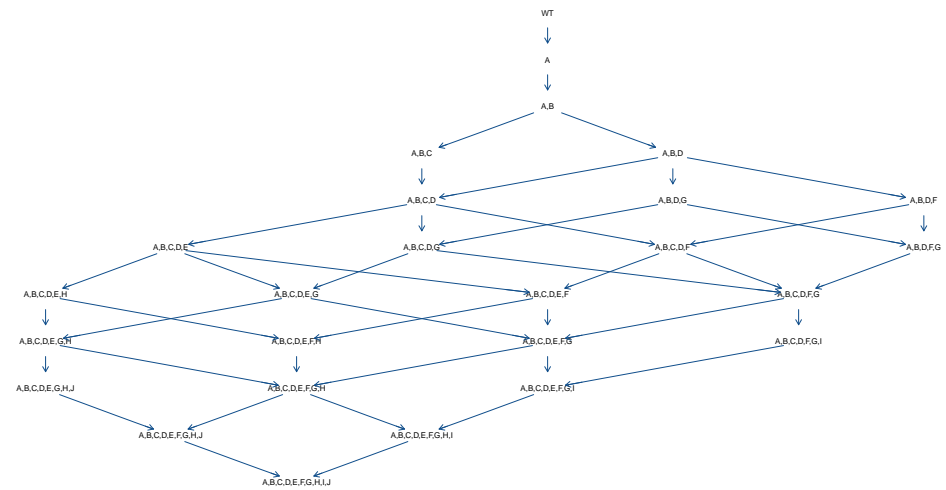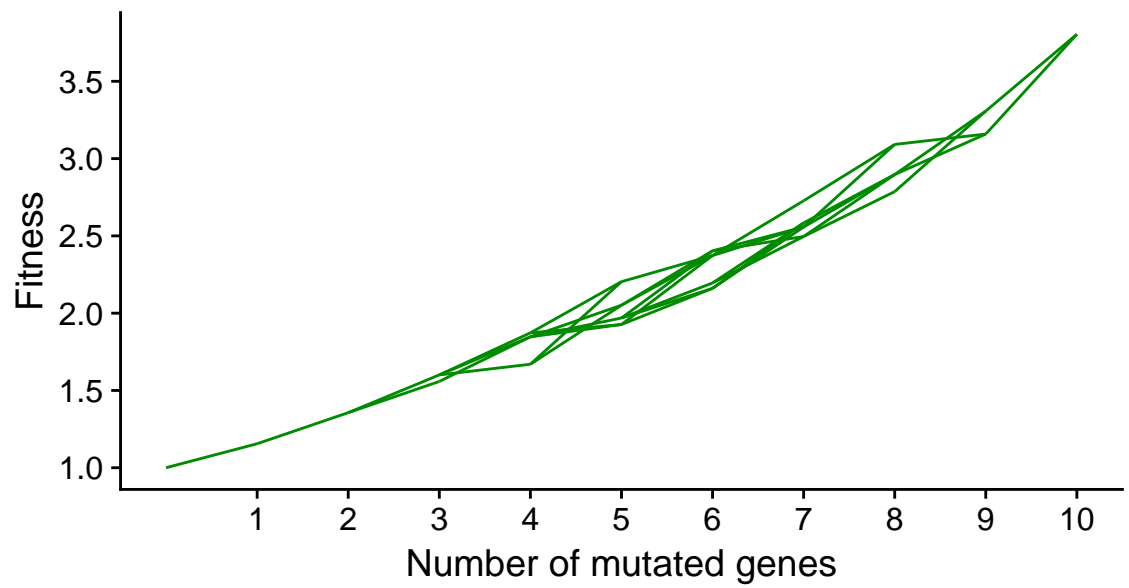

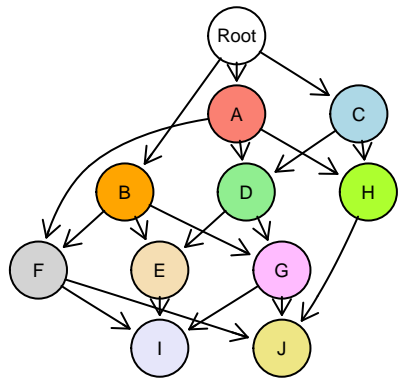

*ID* MJxO4QrzOUXVWzXM  
*acc genotypes* 36  
*peaks no back* 1  
*removed edges* 0  
*prop rem edges* 0

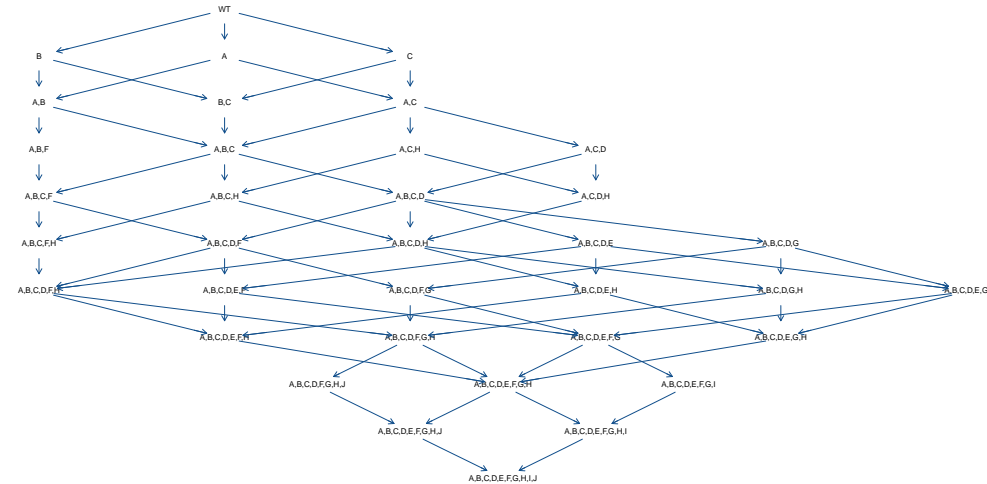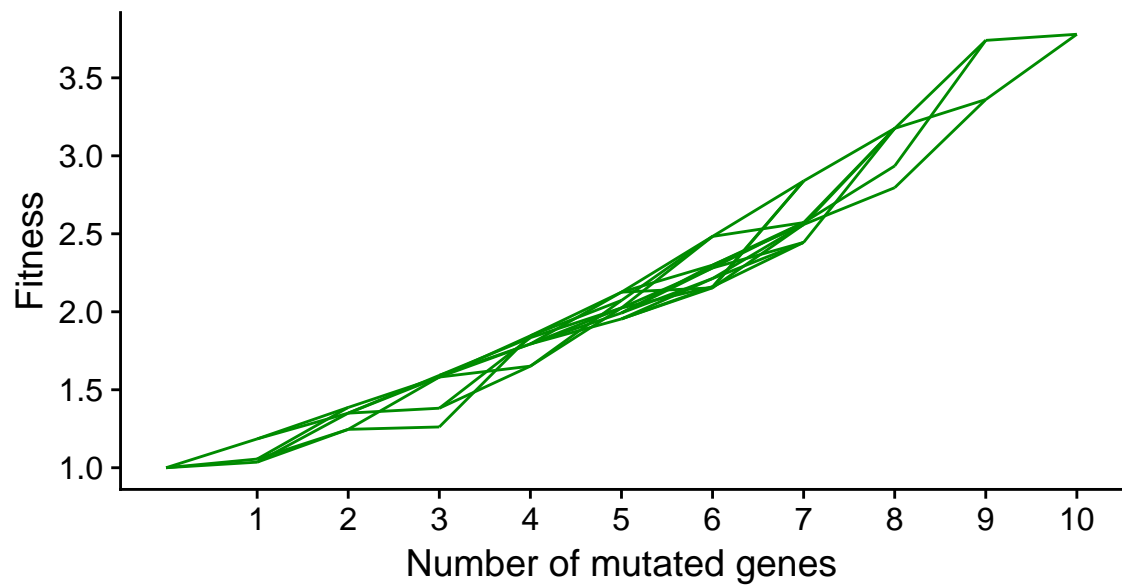

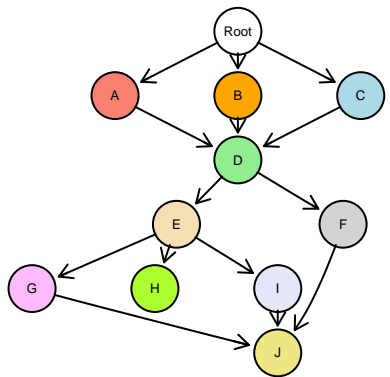

*ID* **MkJPmR2HWGDw34xG**  
*acc genotypes* **28**  
*peaks no back* 1  
*removed edges* 0  
*prop rem edges* 0

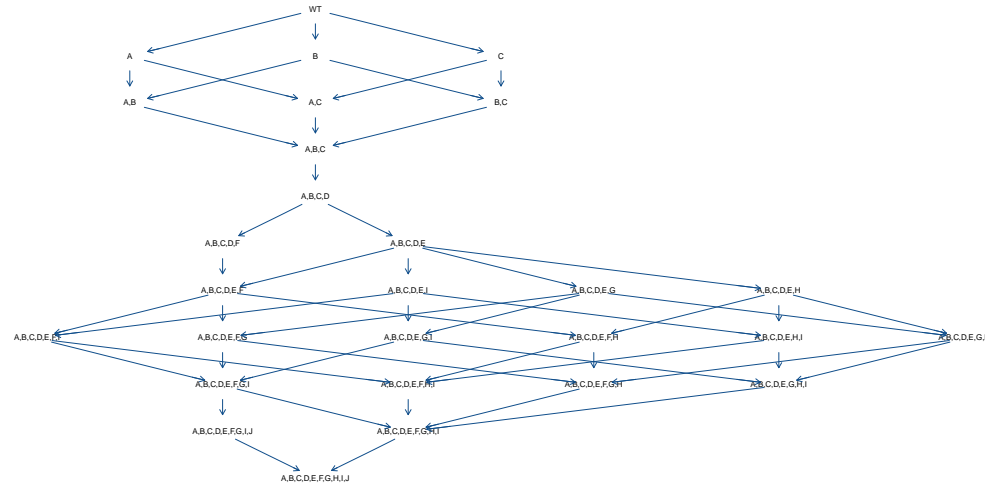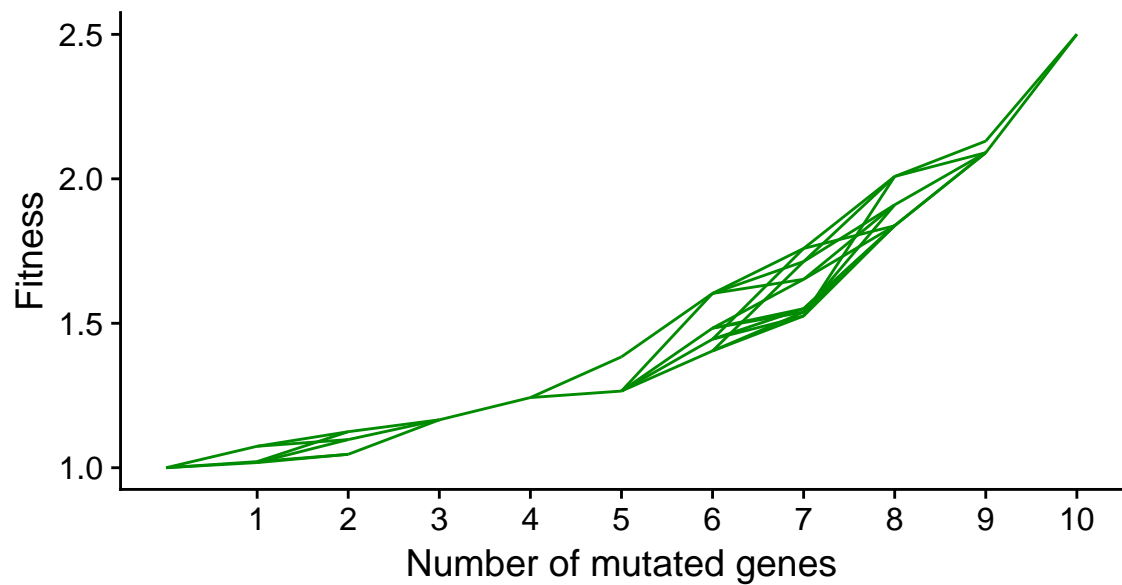



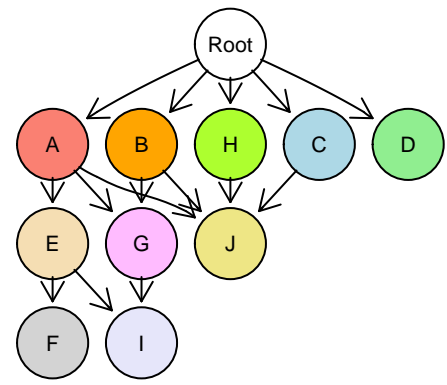

ID **MocksvQ5er102Pjpk**  
 acc genotypes **120**  
 peaks no back **1**  
 removed edges **0**  
 prop rem edges **0**

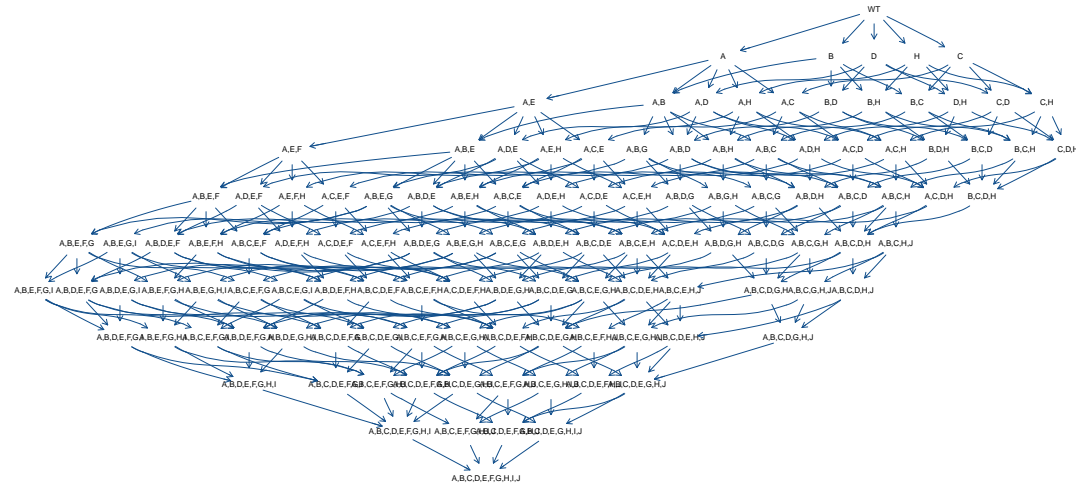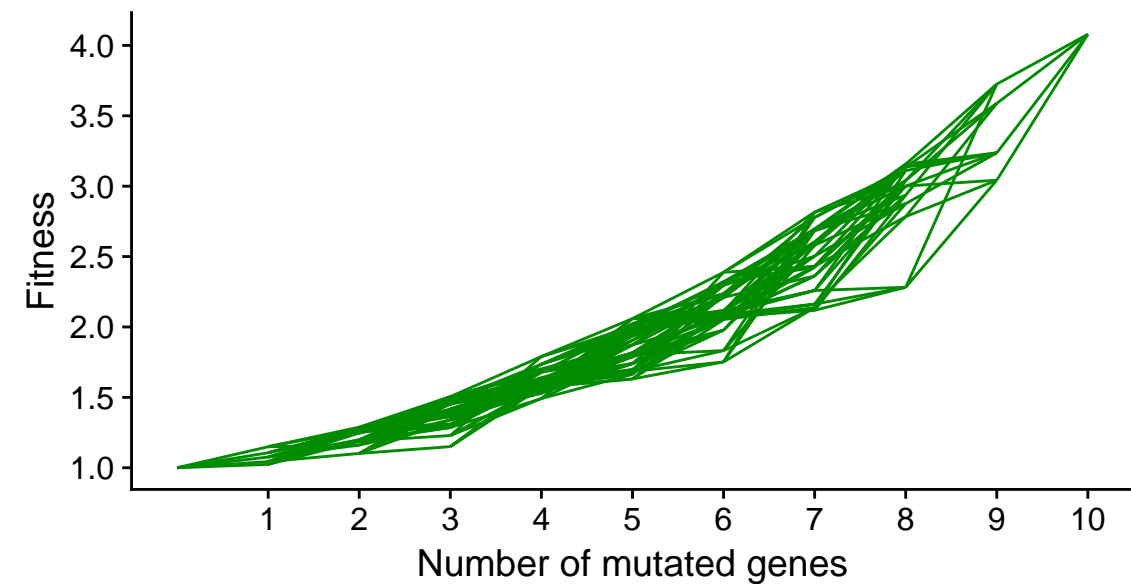

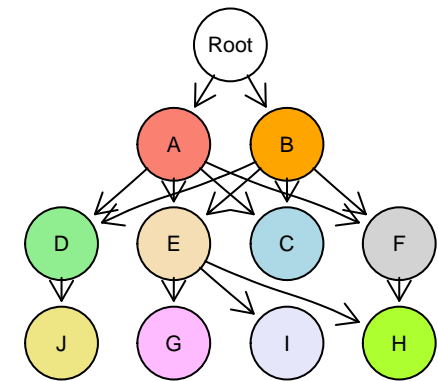

*ID*    MPXnkjvgPoPYXZbV  
*acc genotypes*    87  
*peaks no back*    1  
*removed edges*    0  
*prop rem edges*    0

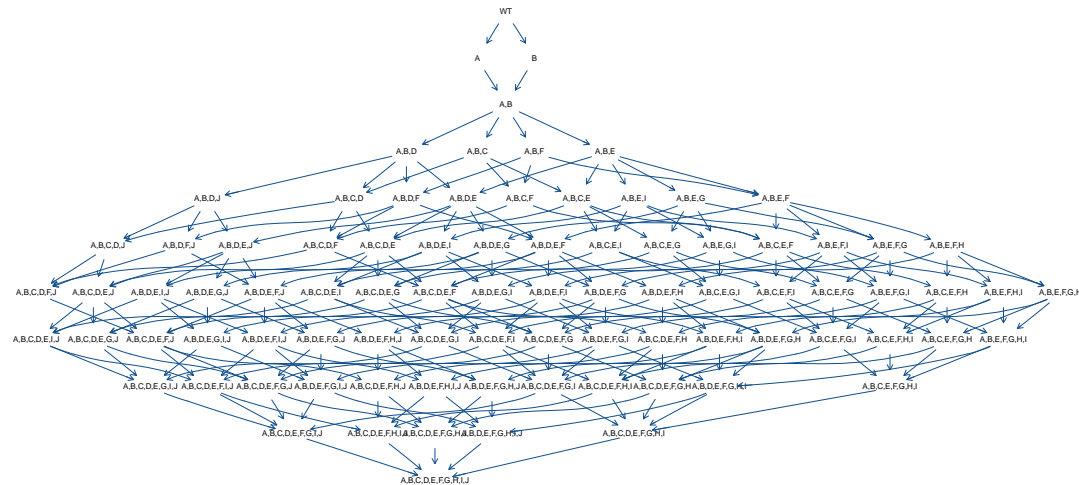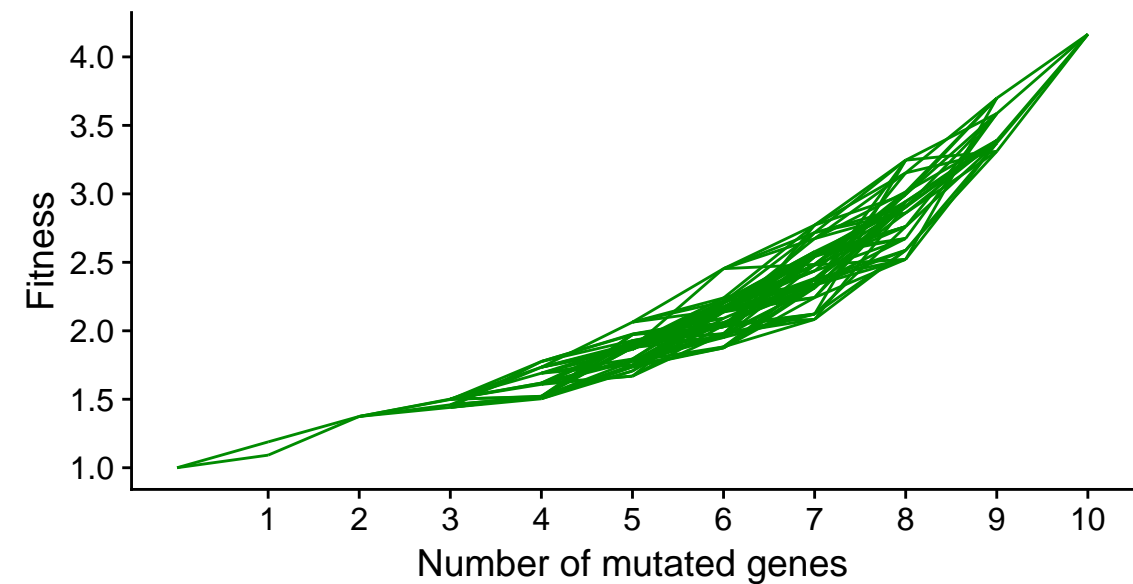

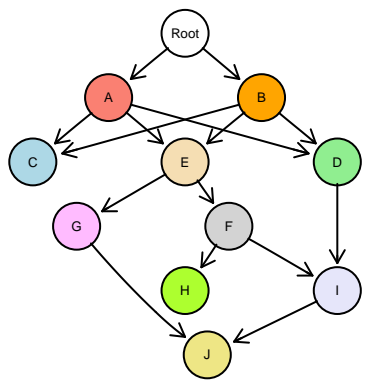

*ID* msWBh10MLRgzEH10BX  
*acc genotypes* 43  
*peaks no back* 1  
*removed edges* 0  
*prop rem edges* 0

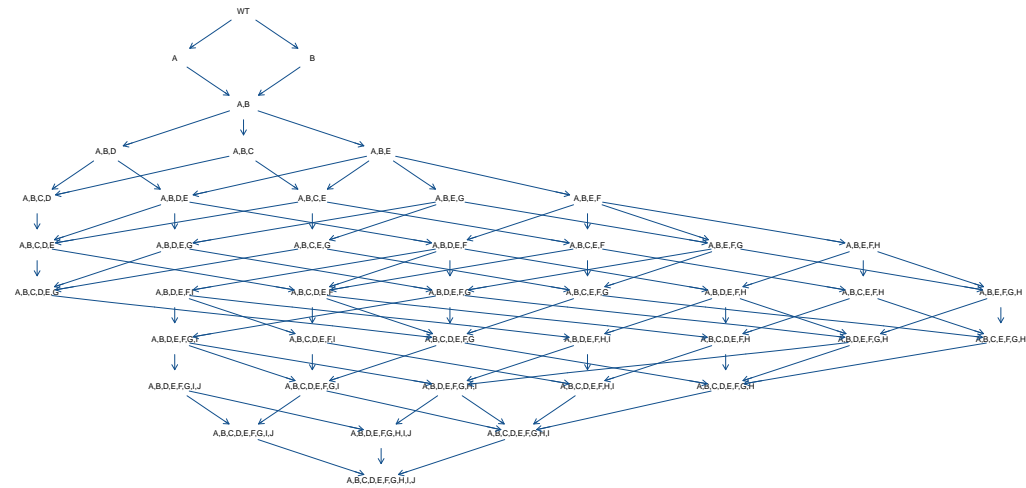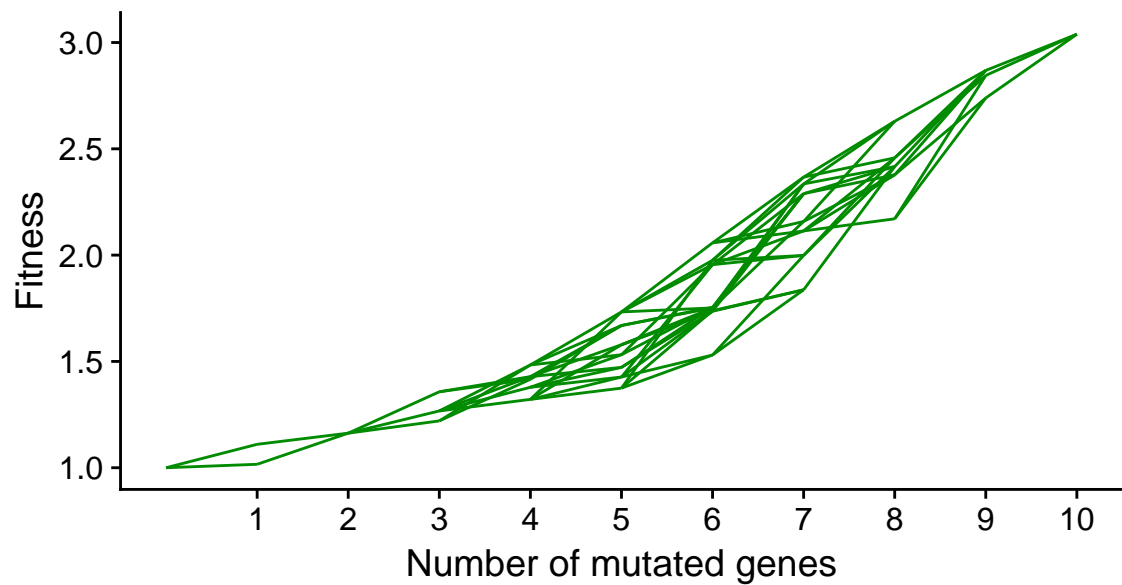

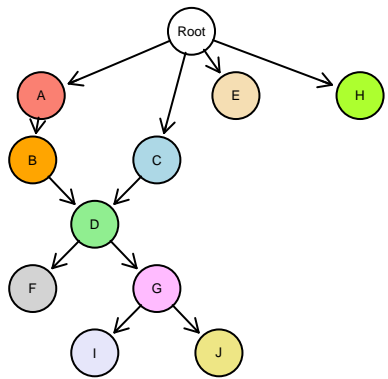

ID MT7WzjxZkqx10snFO  
 acc genotypes 64  
 peaks no back 1  
 removed edges 0  
 prop rem edges 0

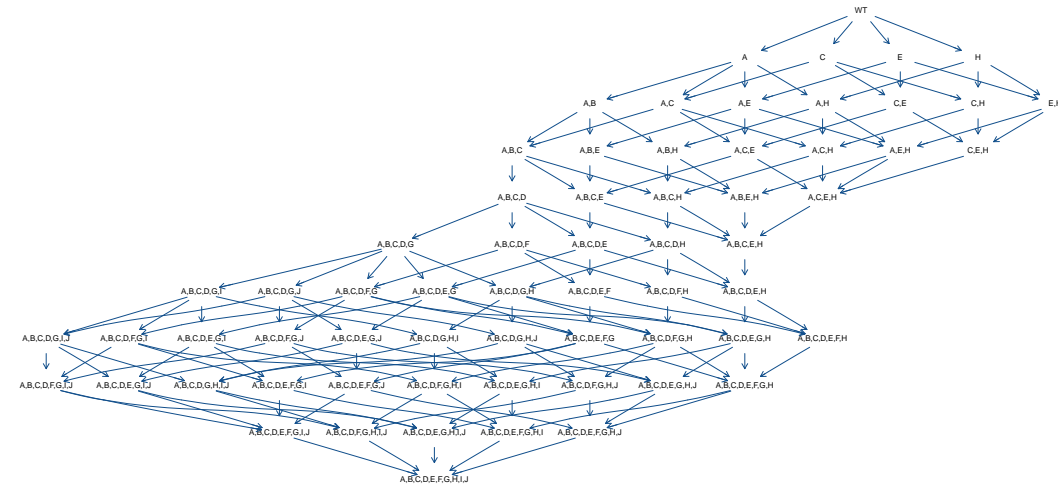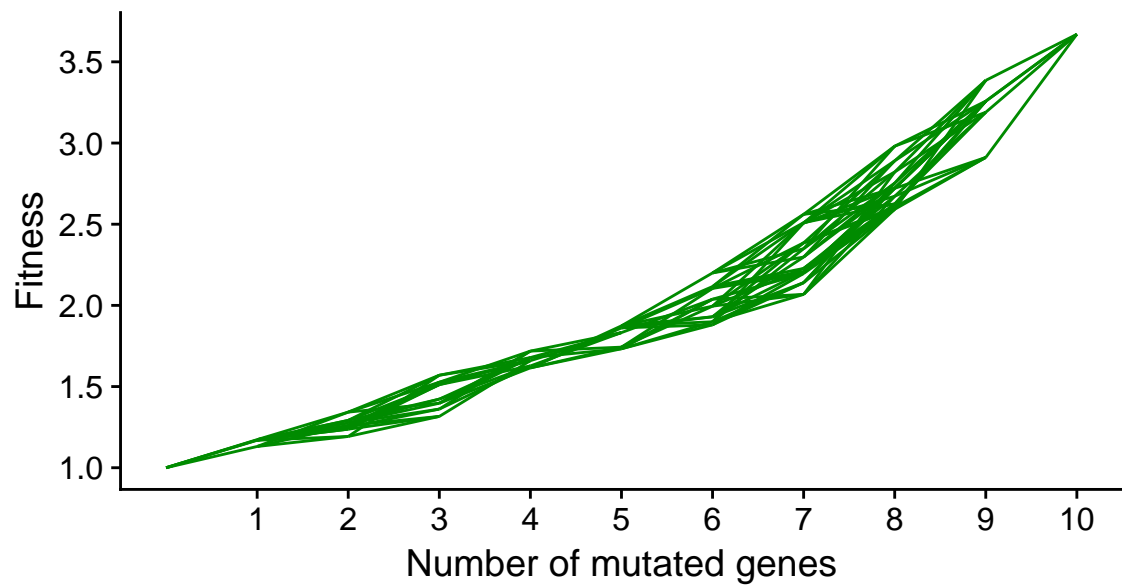

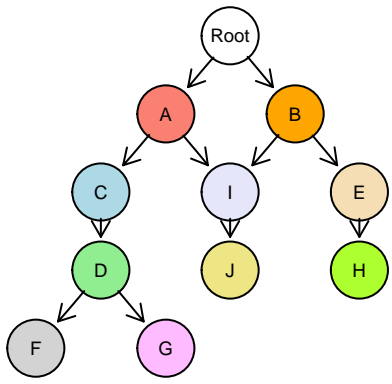

ID n210BxEwpJXJV8VL6  
 acc genotypes 64  
 peaks no back 1  
 removed edges 0  
 prop rem edges 0

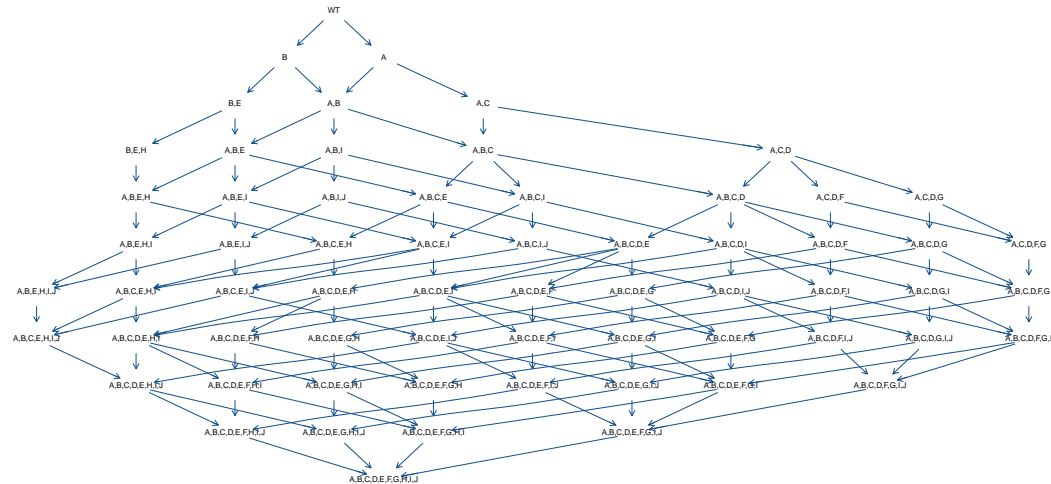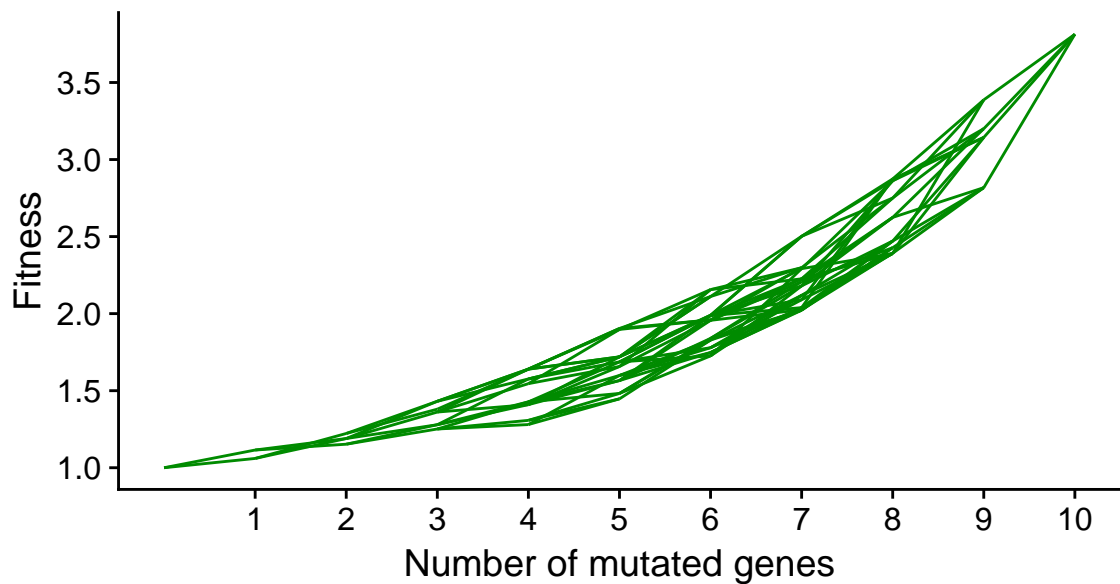

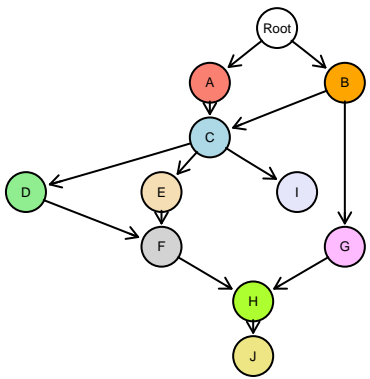

*ID* Nd5tXtGonmFk3JtF  
*acc genotypes* 30  
*peaks no back* 1  
*removed edges* 0  
*prop rem edges* 0

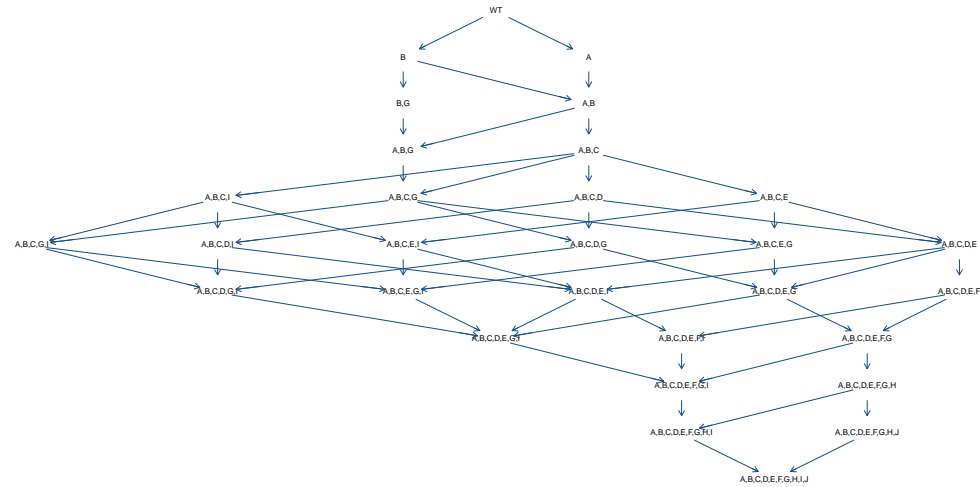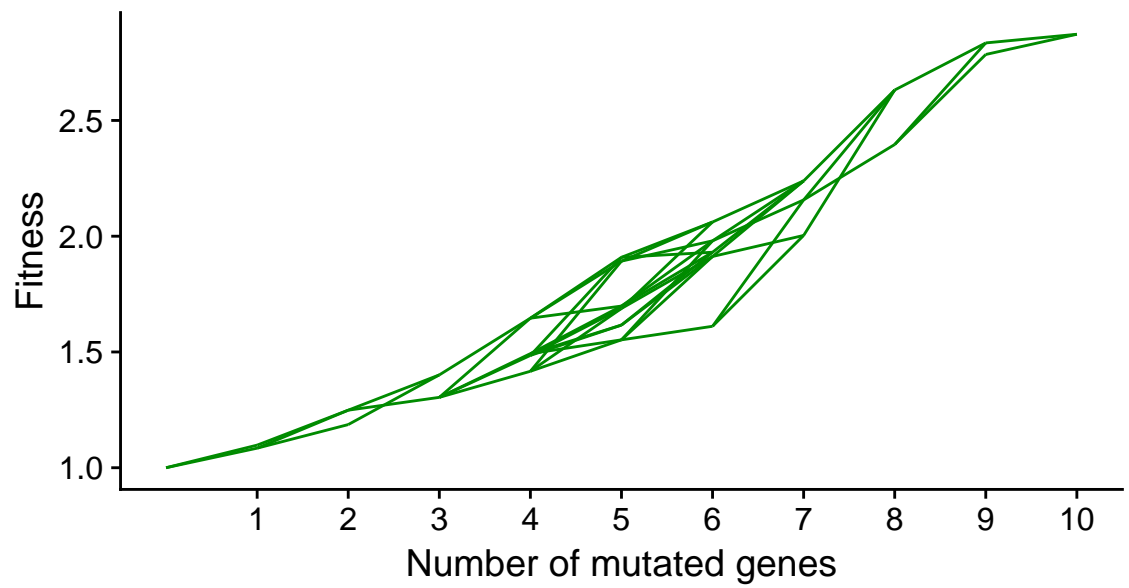

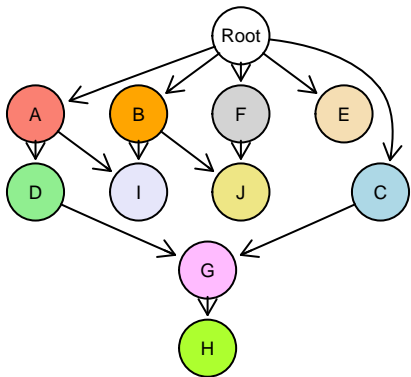

ID **njDxDAtFc4uTrco**  
 acc genotypes **116**  
 peaks no back 1  
 removed edges 0  
 prop rem edges 0

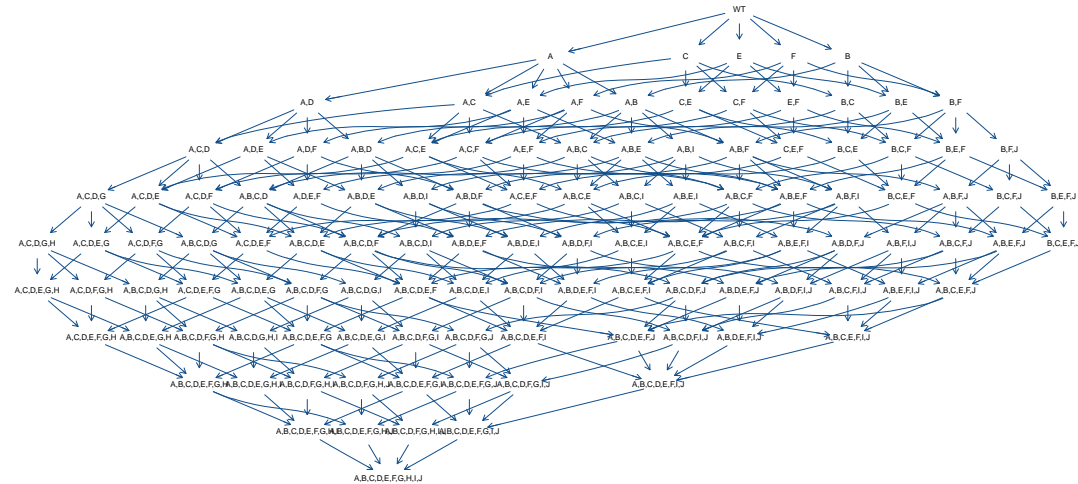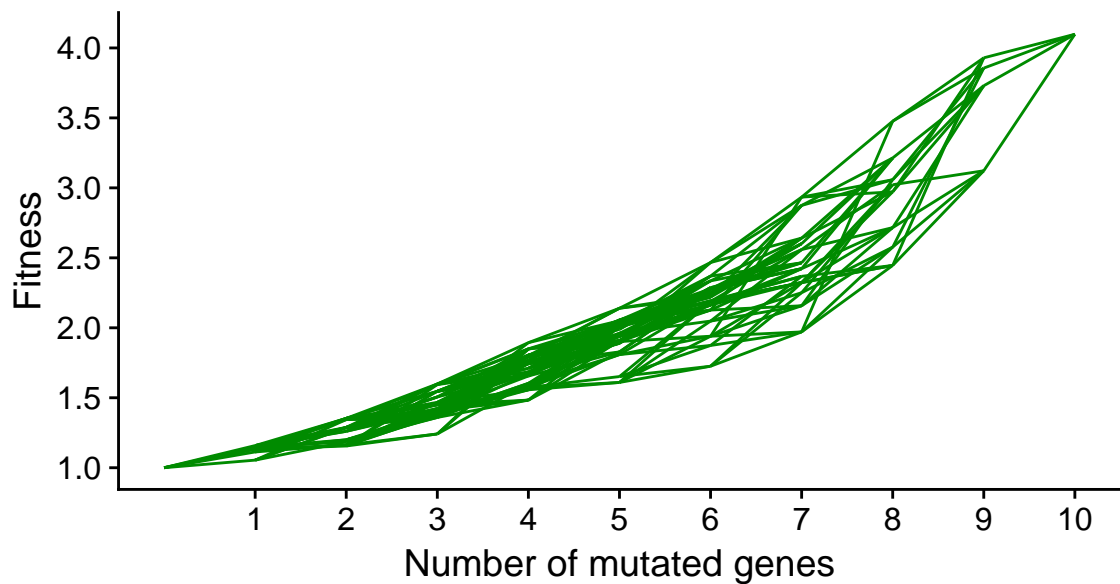

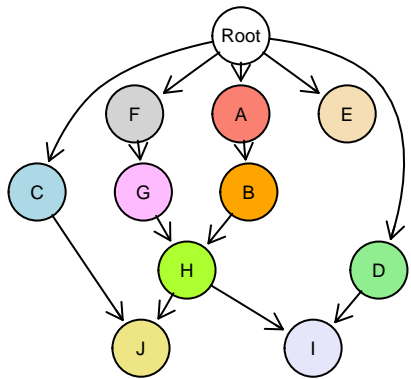

ID **nO5yu7D15ZhqKnN9**  
 acc genotypes **90**  
 peaks no back **1**  
 removed edges **0**  
 prop rem edges **0**

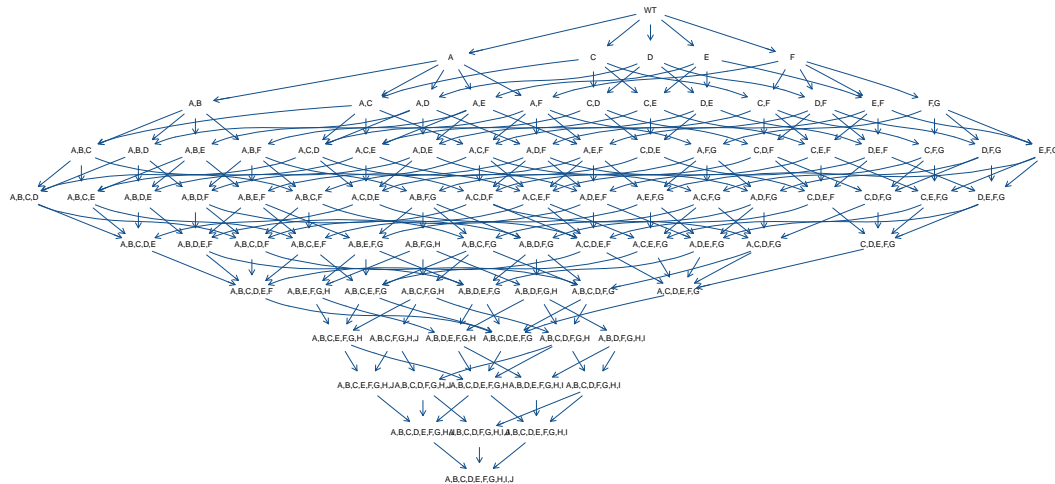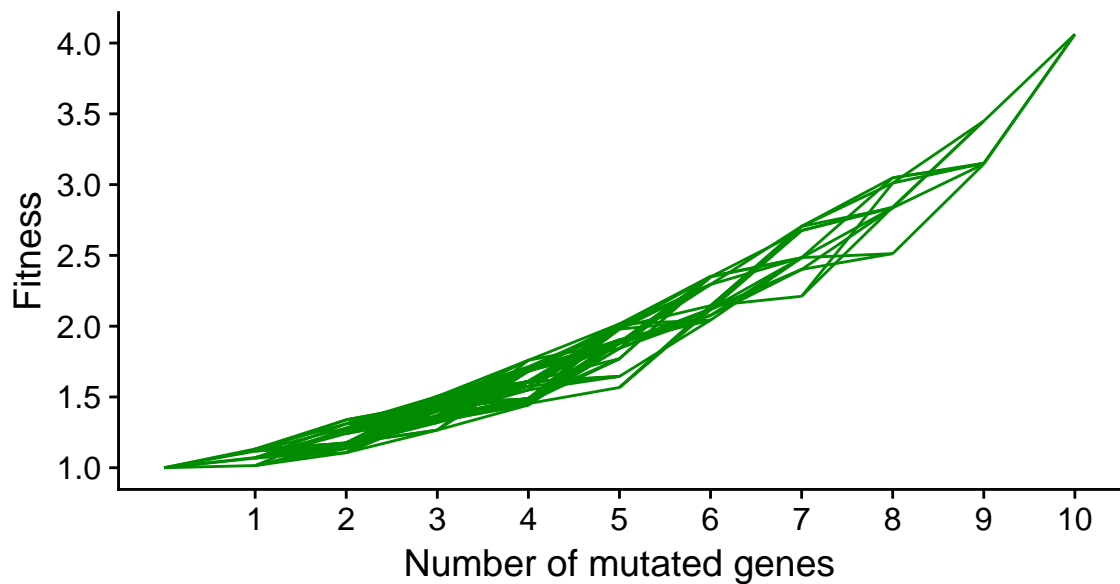



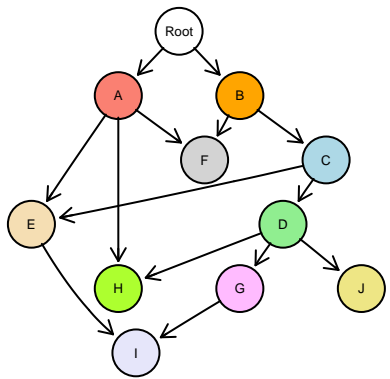

ID NP7ssqpSWvlesNBx  
 acc genotypes 54  
 peaks no back 1  
 removed edges 0  
 prop rem edges 0

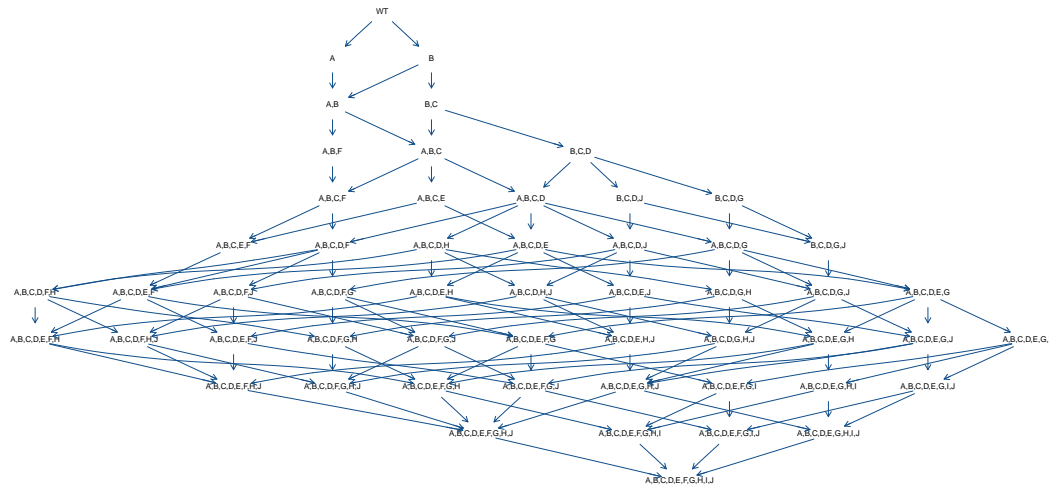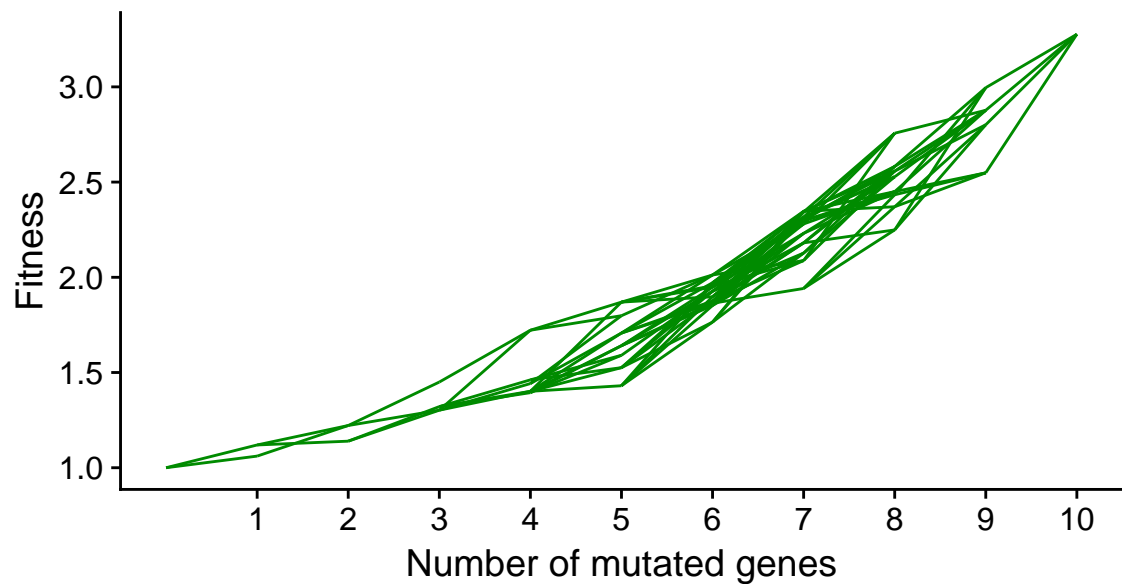

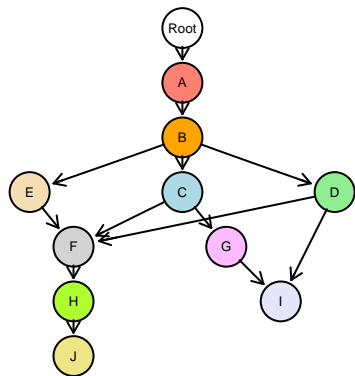

*ID* NyMcE3XWsePNxuEs  
*acc genotypes* 25  
*peaks no back* 1  
*removed edges* 0  
*prop rem edges* 0

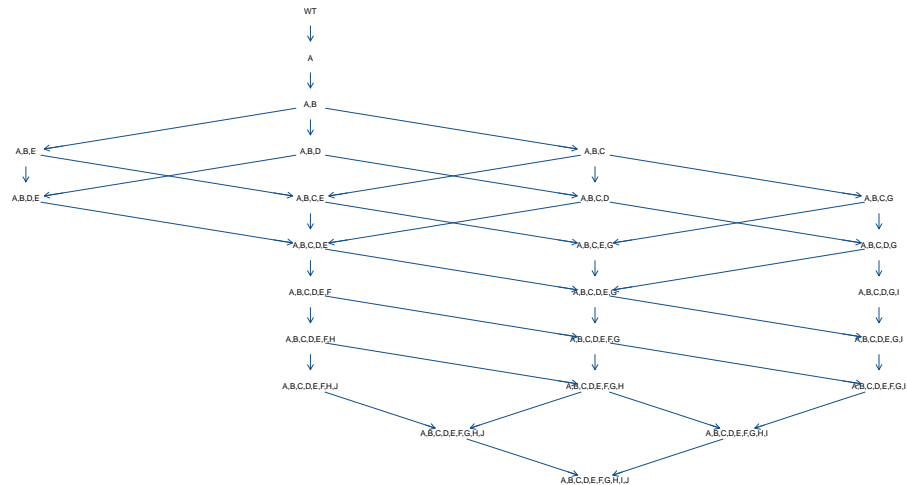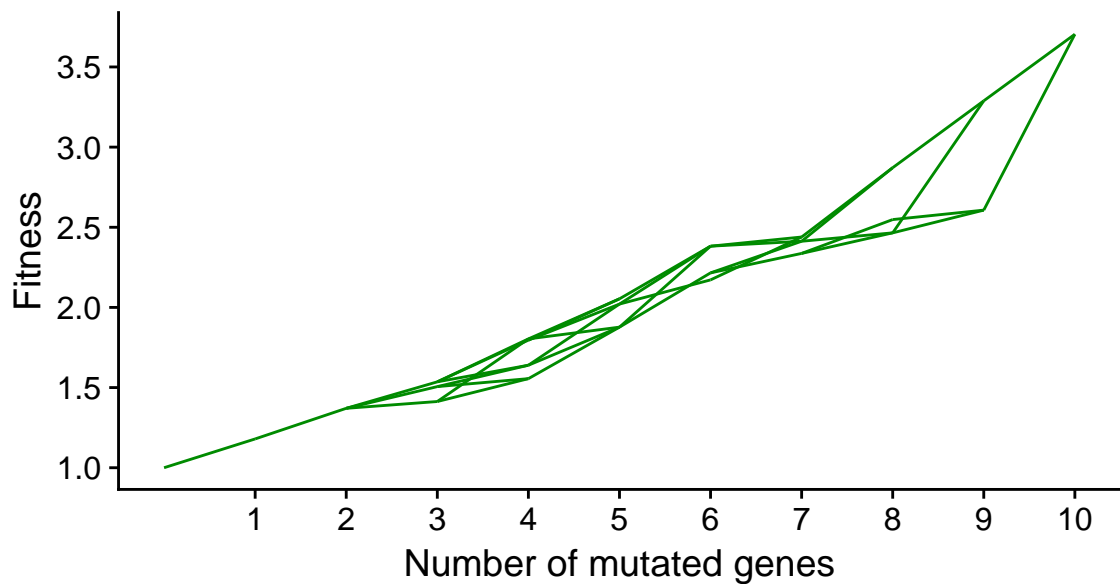

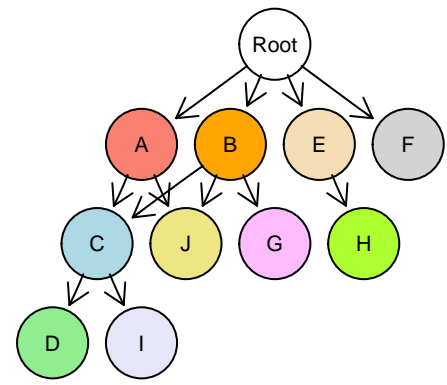

*ID* o10BaslJKzTznq5sp  
*acc genotypes* 144  
*peaks no back* 1  
*removed edges* 0  
*prop rem edges* 0

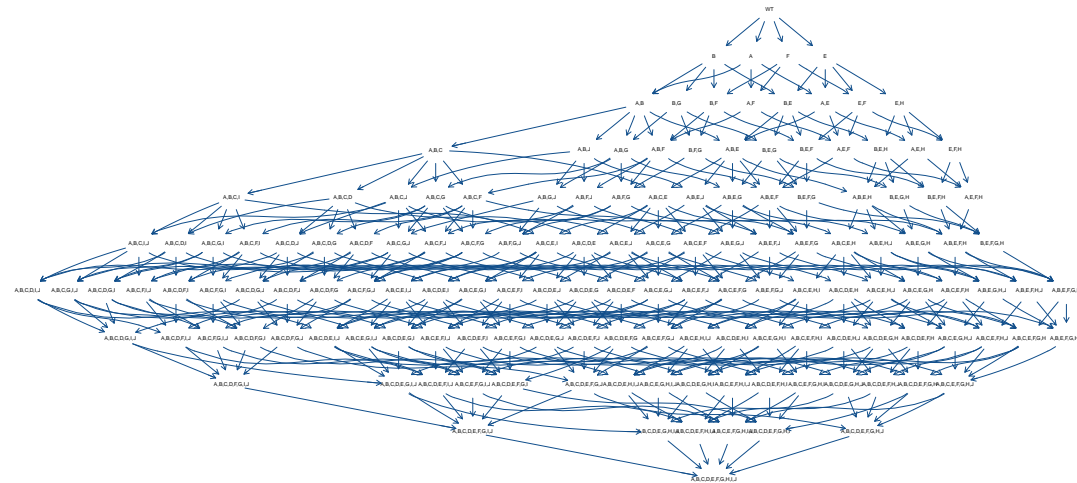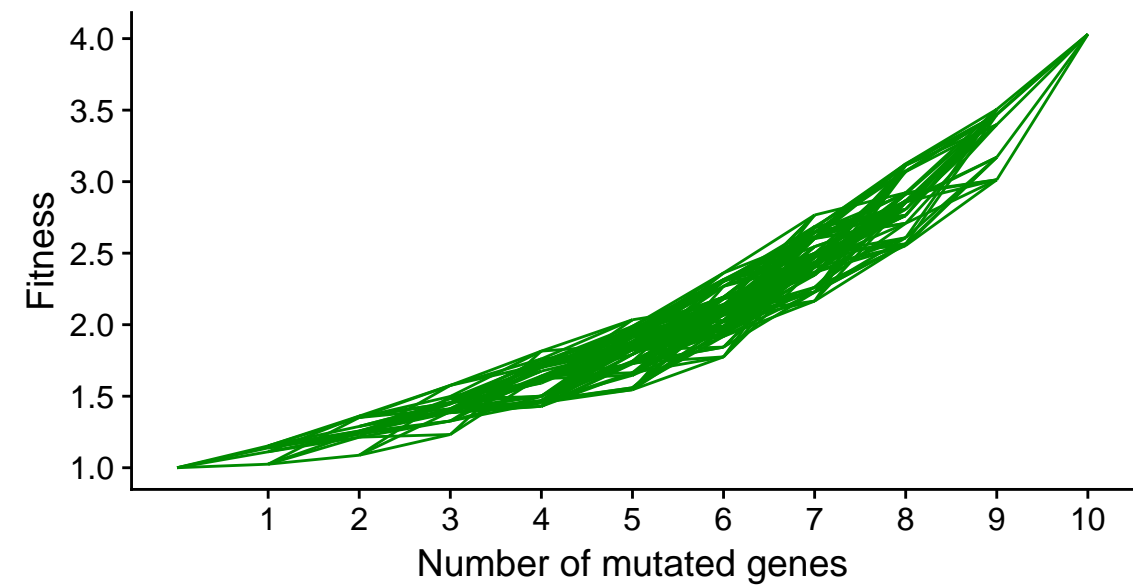

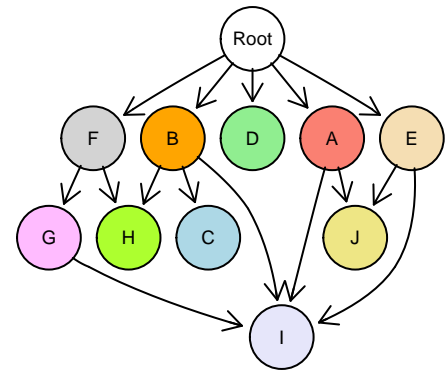

ID **o89L6ak94kWOZRNA**  
 acc genotypes **146**  
 peaks no back **1**  
 removed edges **0**  
 prop rem edges **0**

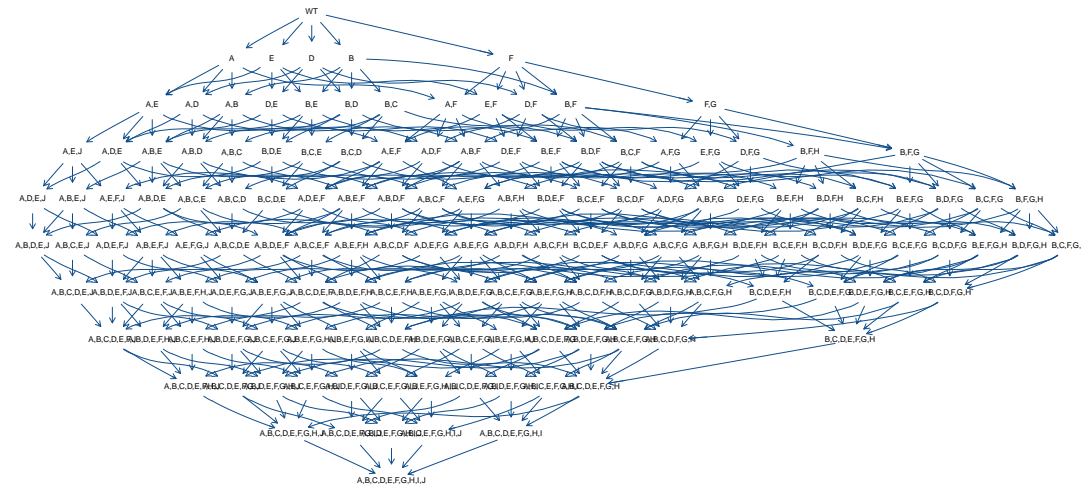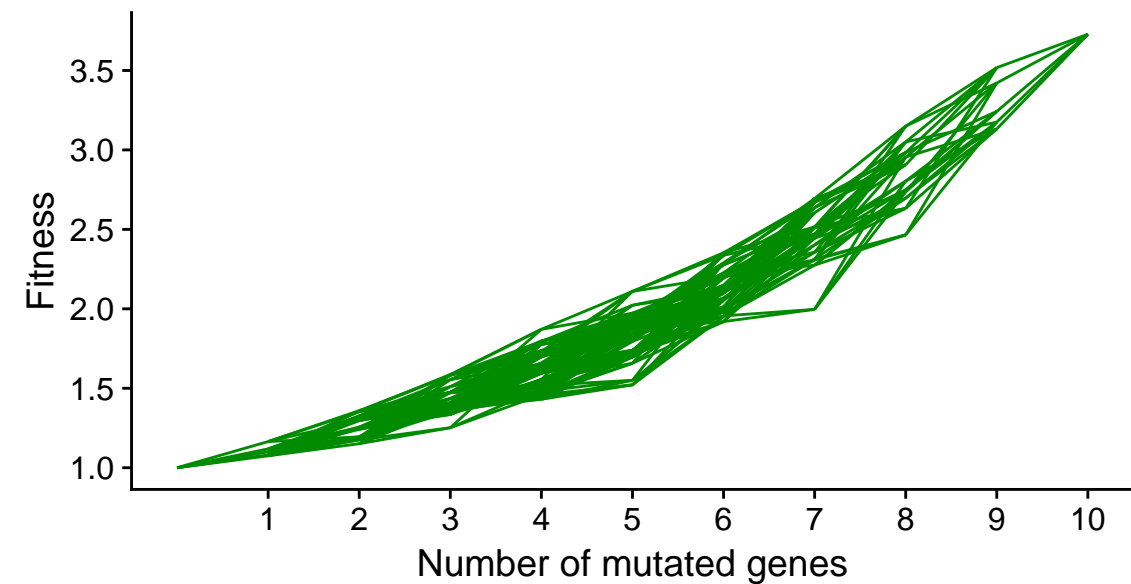

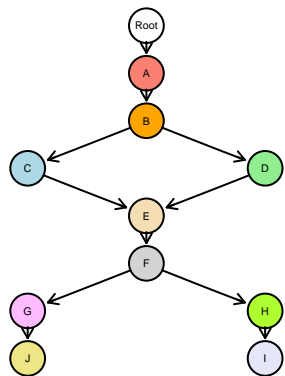

ID **ocx2Aw4wa94NsR64**  
 acc genotypes **16**  
 peaks no back 1  
 removed edges 0  
 prop rem edges 0

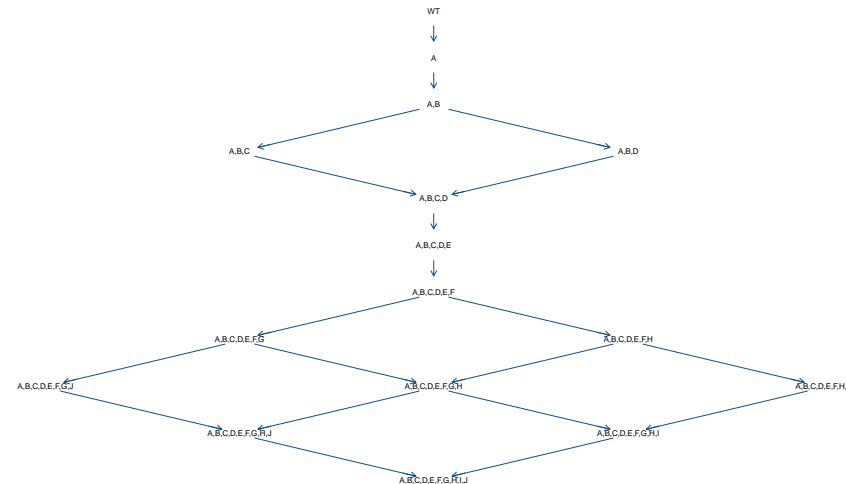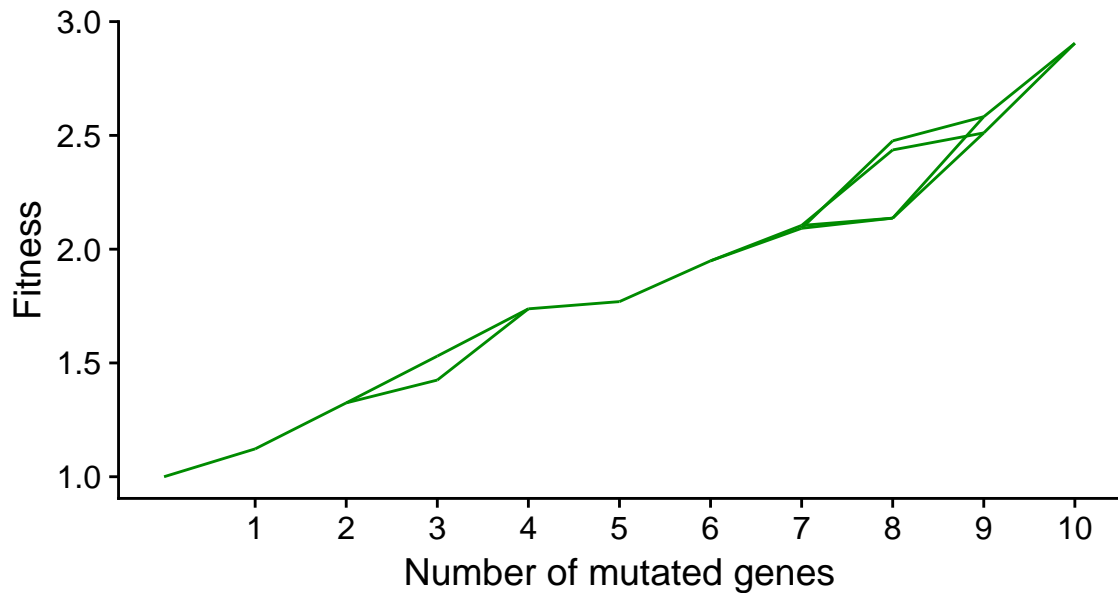

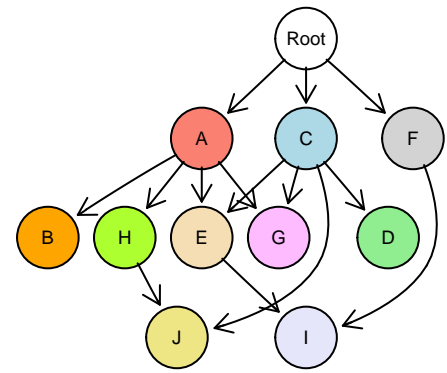

ID OGeUcOzxp4J7ocOW  
 acc genotypes 134  
 peaks no back 1  
 removed edges 0  
 prop rem edges 0

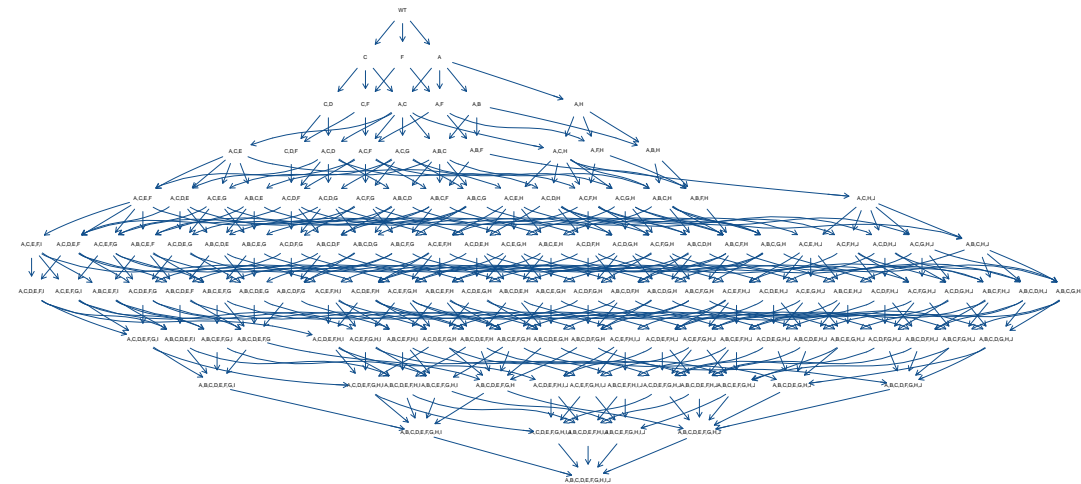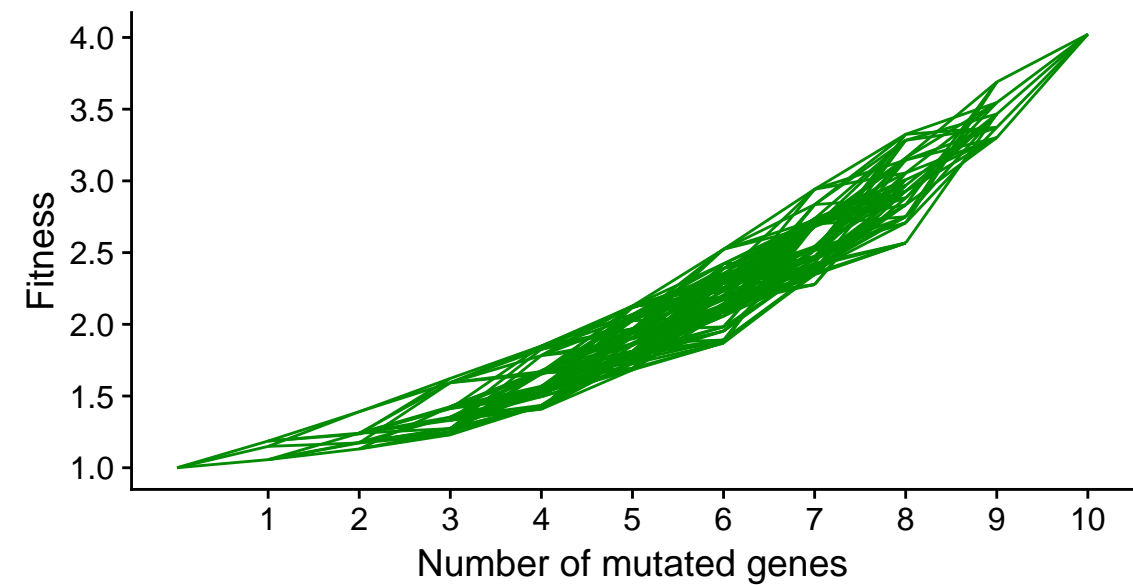

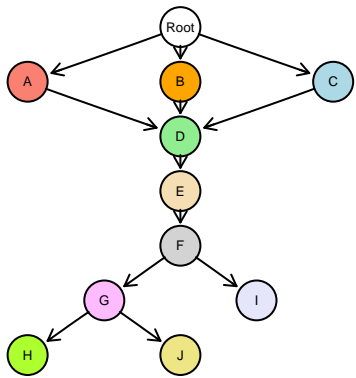

ID oGhD99FEVEPwA8X8  
 acc genotypes 20  
 peaks no back 1  
 removed edges 0  
 prop rem edges 0

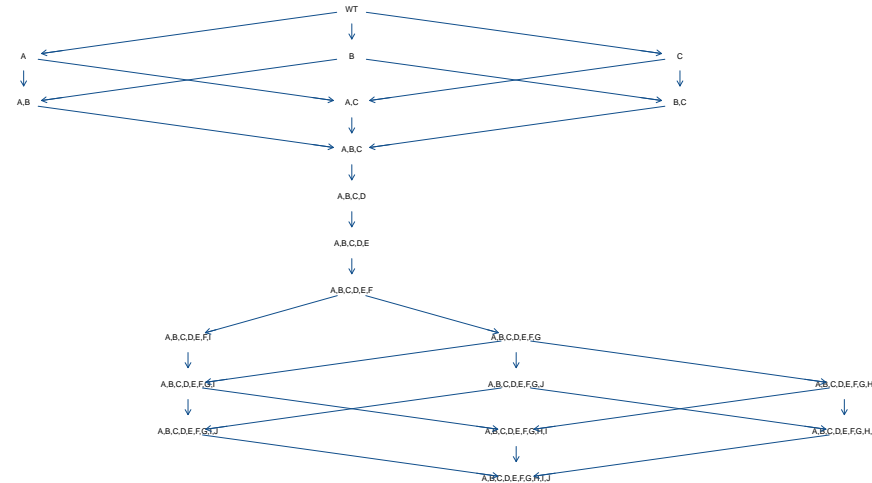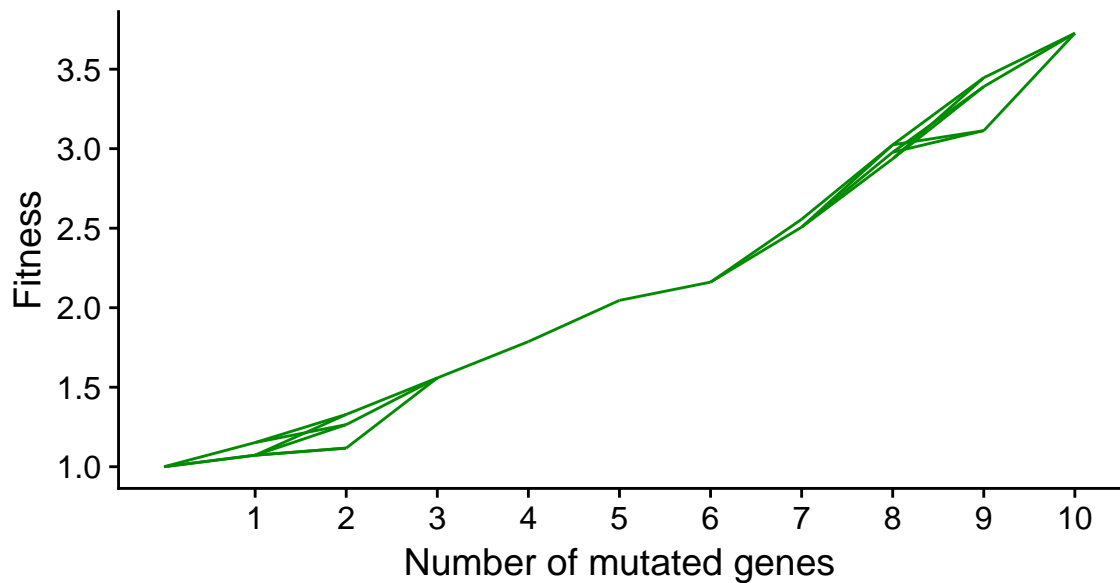

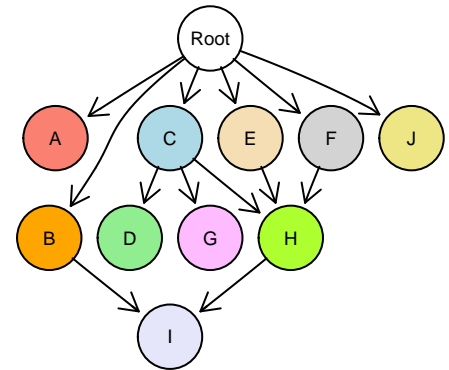

ID **ohfmWmj2mPmljDEY**  
 acc genotypes **208**  
 peaks no back **1**  
 removed edges **0**  
 prop rem edges **0**

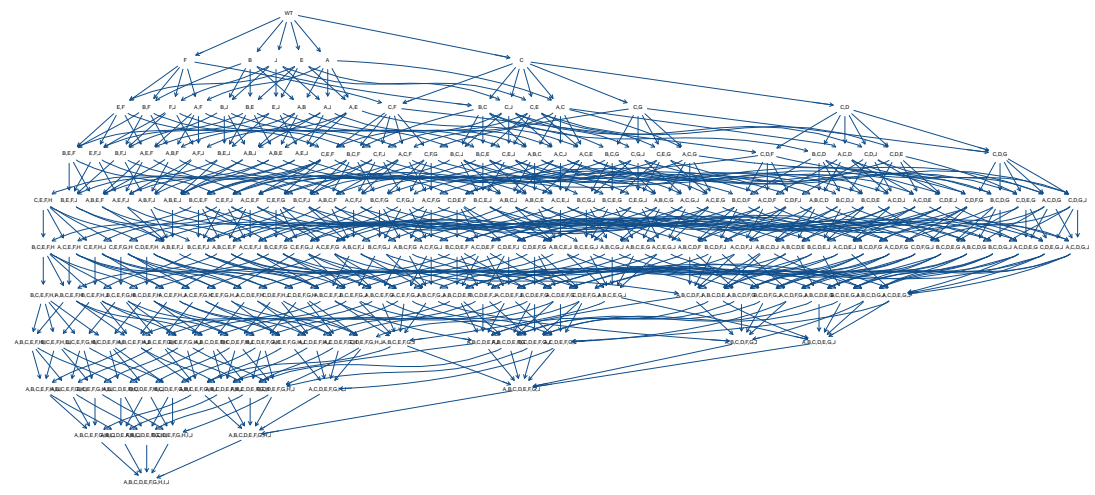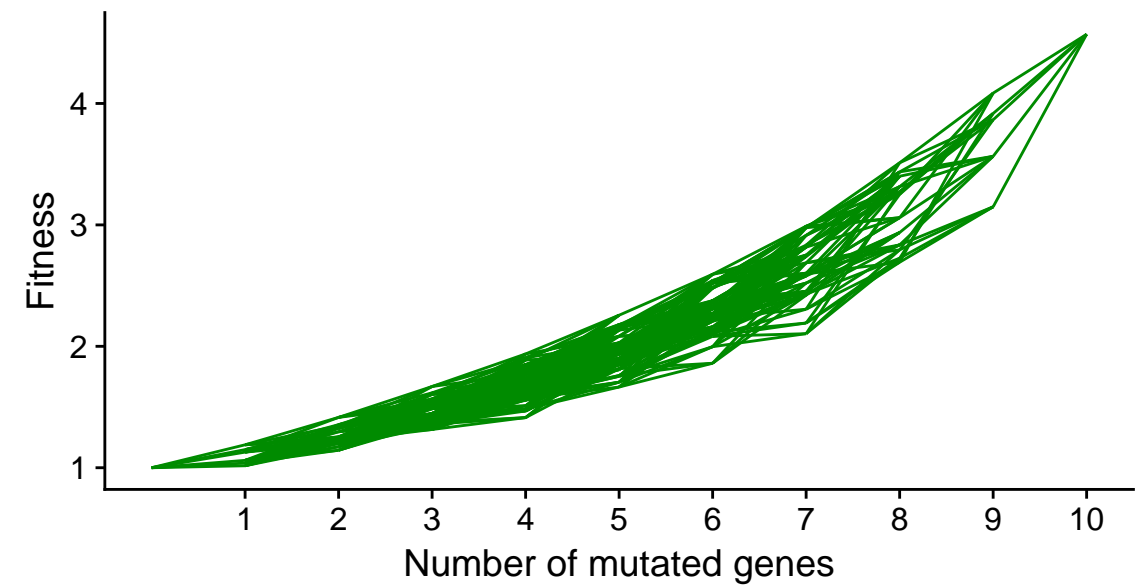



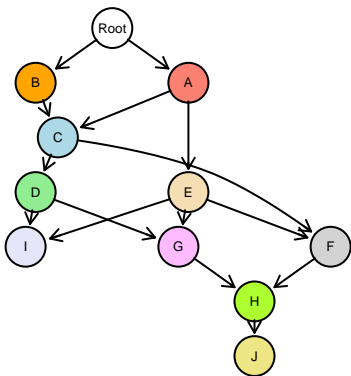

ID oRJlh1e10mdF10GFUm  
 acc genotypes 22  
 peaks no back 1  
 removed edges 0  
 prop rem edges 0

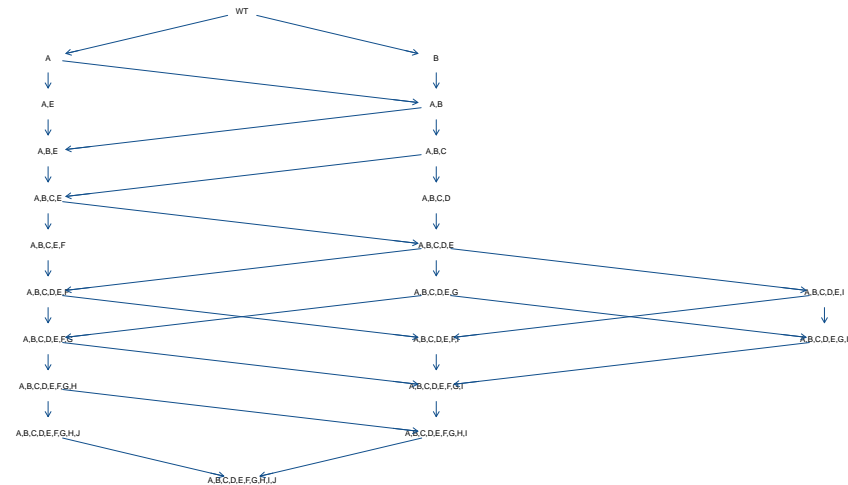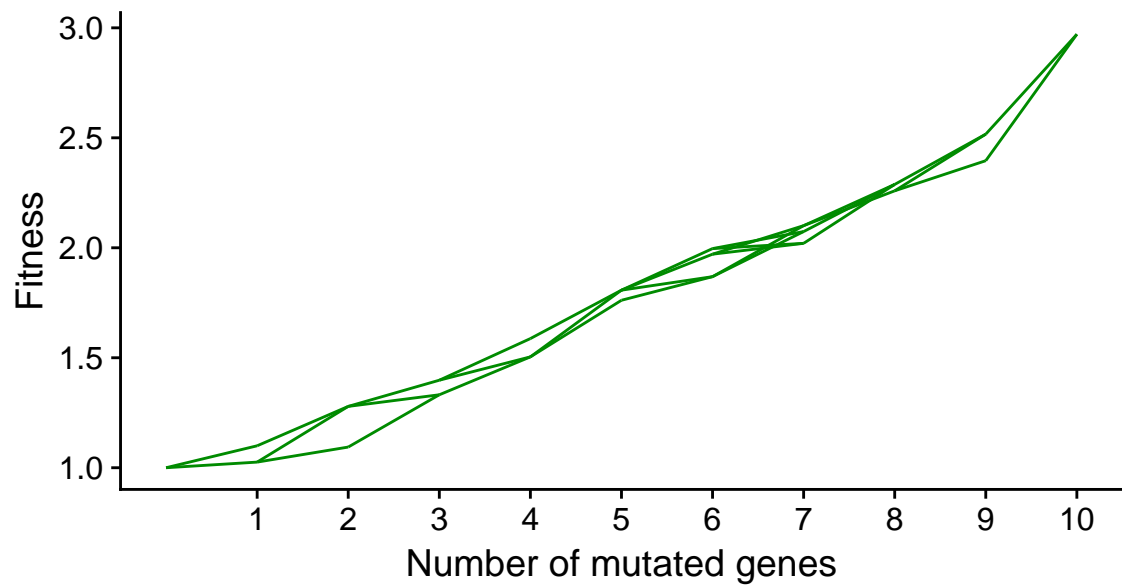

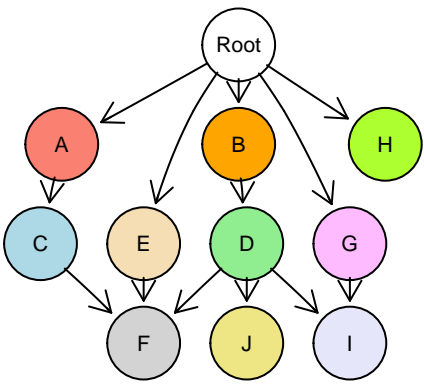

ID PEUXKMJo1Ym7Cv4Z  
 acc genotypes 132  
 peaks no back 1  
 removed edges 0  
 prop rem edges 0

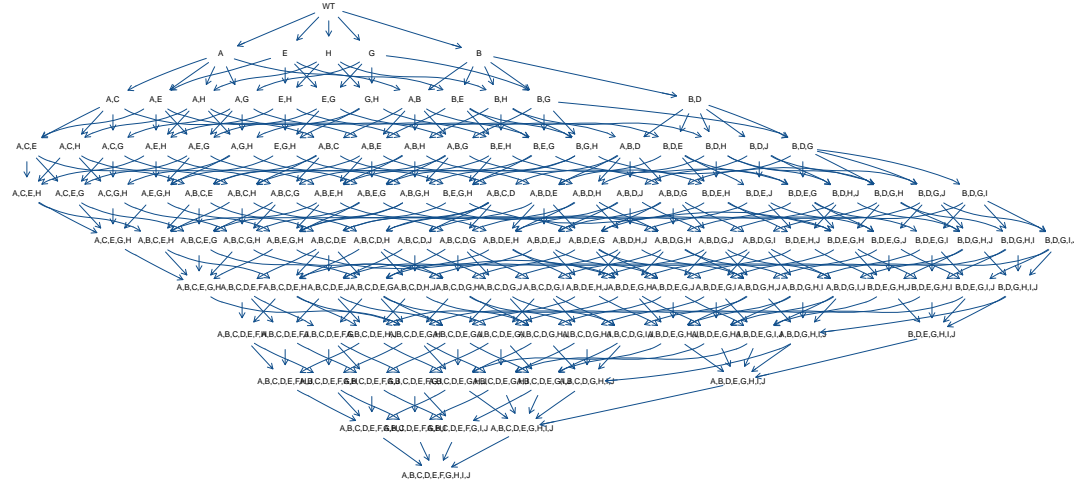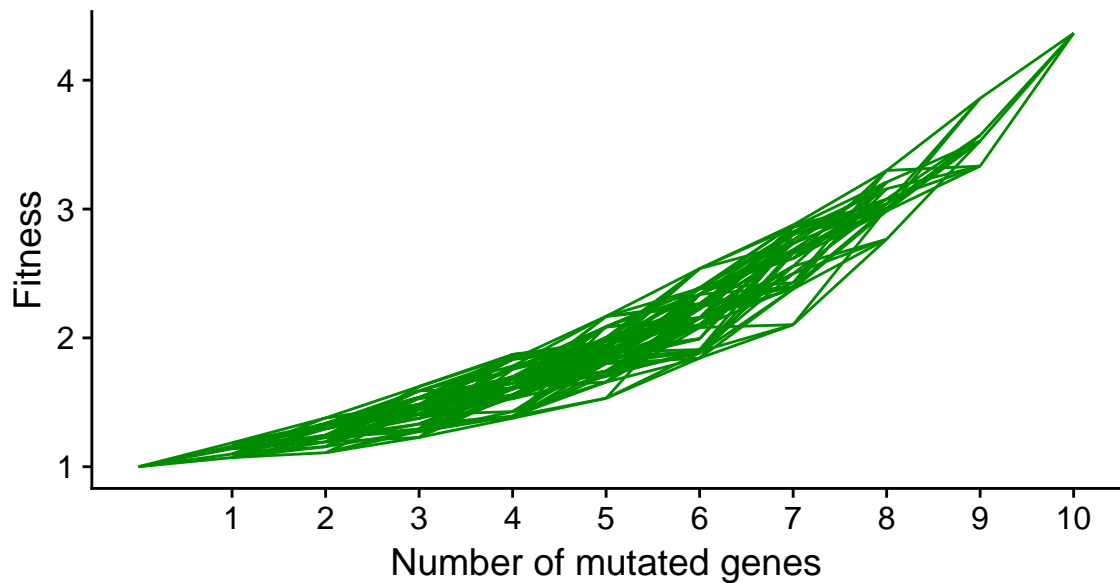

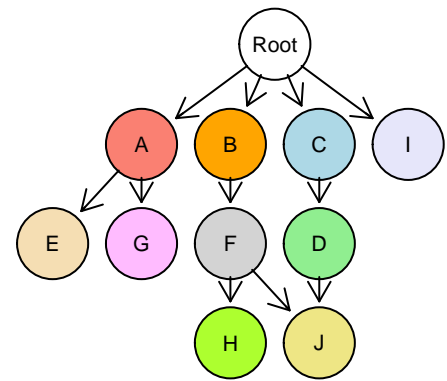

ID PhaG1vE1MZA6aPS7  
 acc genotypes 140  
 peaks no back 1  
 removed edges 0  
 prop rem edges 0

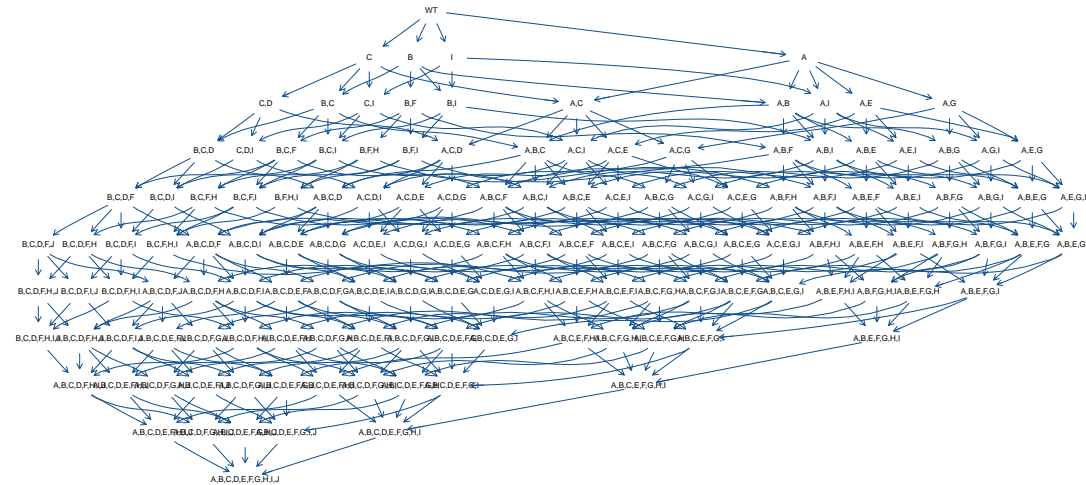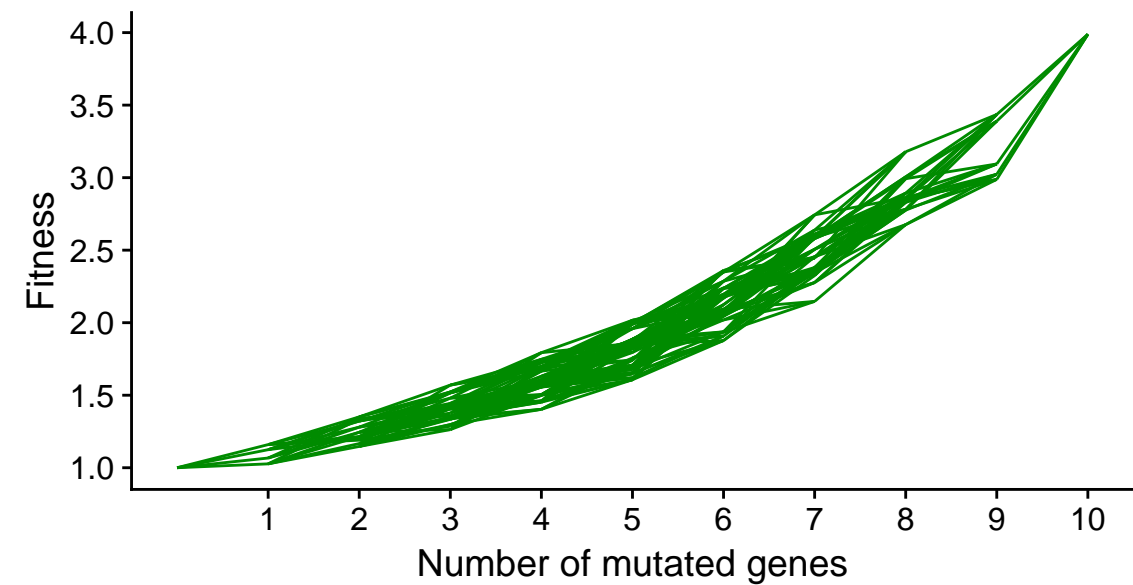

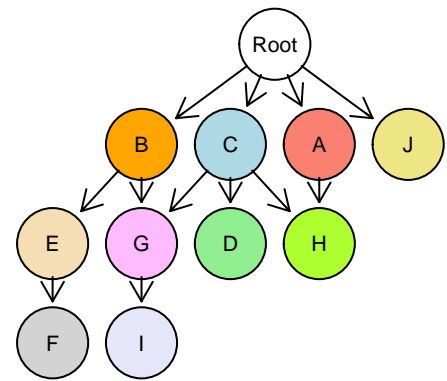

*ID* P110ybVHbxKrShrRr  
*acc genotypes* 136  
*peaks no back* 1  
*removed edges* 0  
*prop rem edges* 0

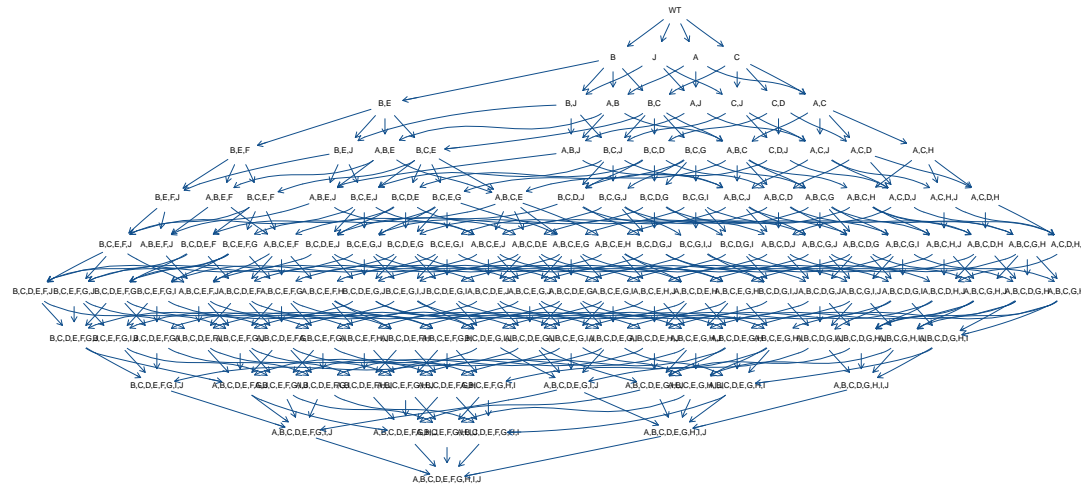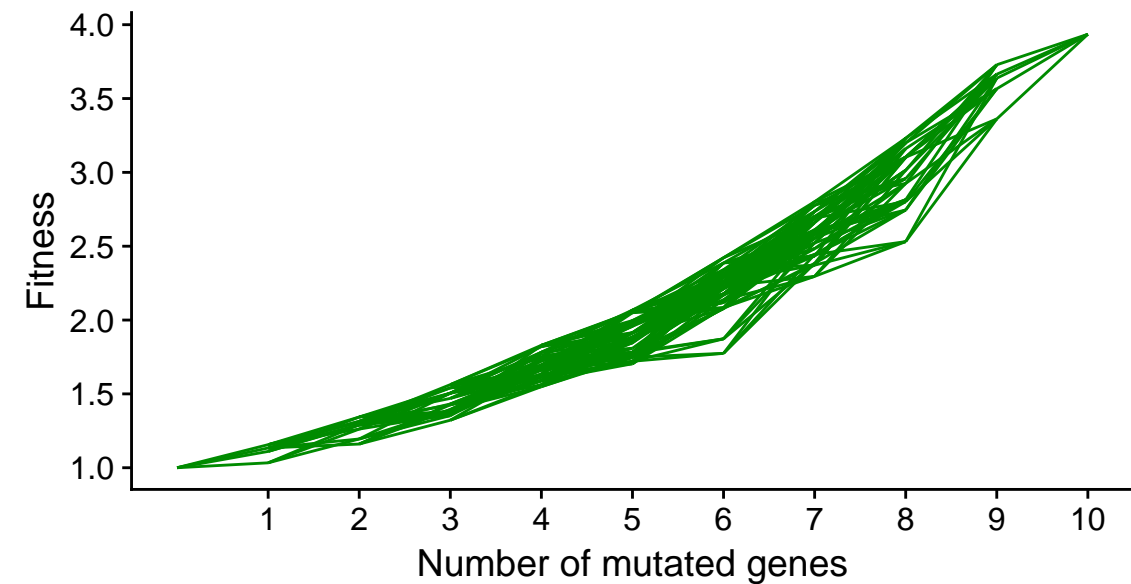

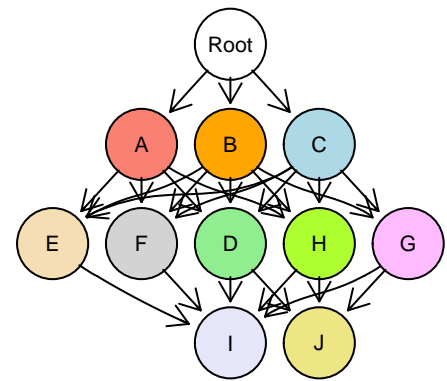

ID pTNzMT9igvRzIPi  
 acc genotypes 46  
 peaks no back 1  
 removed edges 0  
 prop rem edges 0

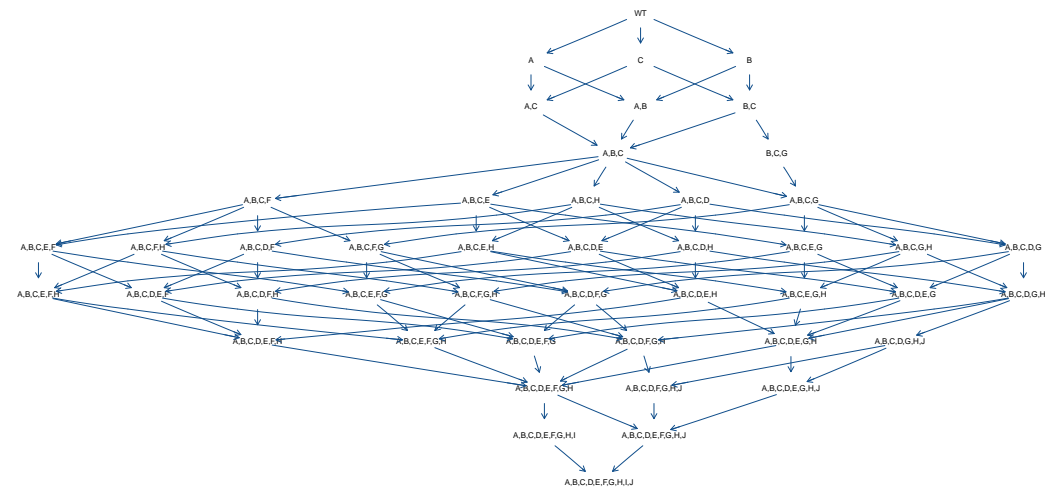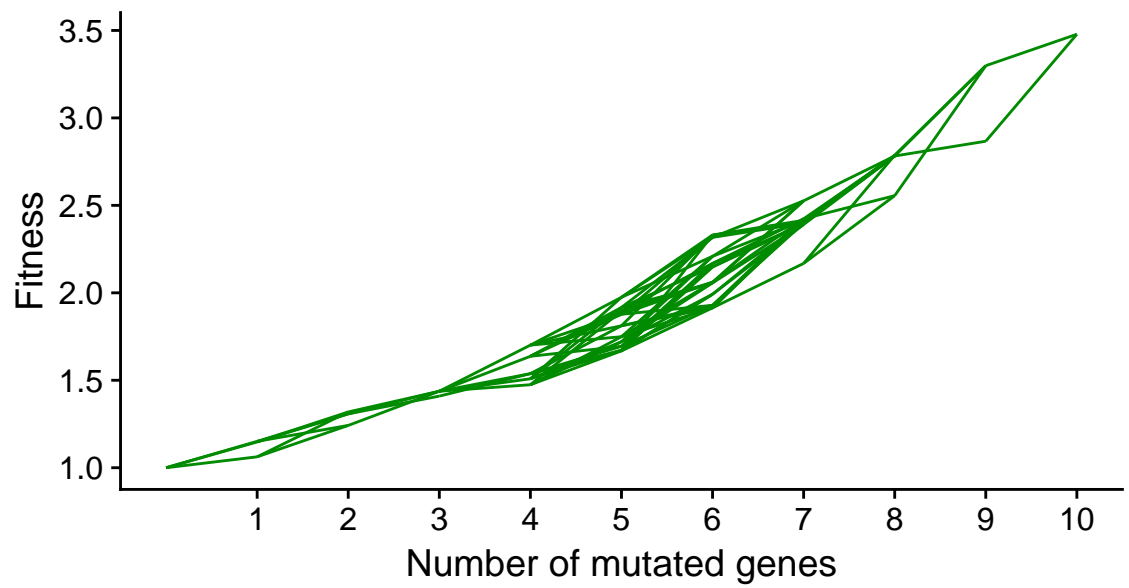

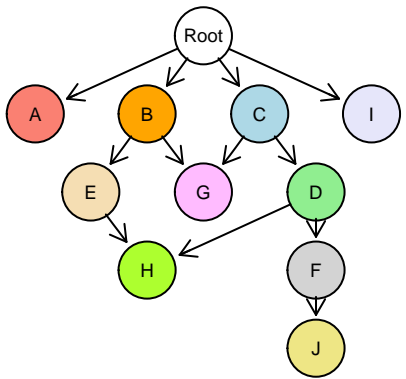

*ID* Pu5M3F61IUoT6zBD  
*acc genotypes* 116  
*peaks no back* 1  
*removed edges* 0  
*prop rem edges* 0

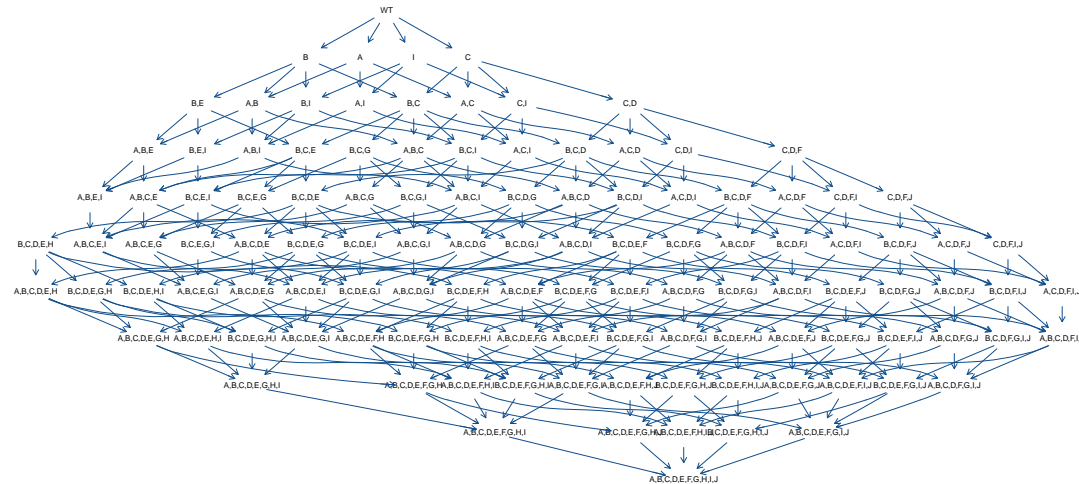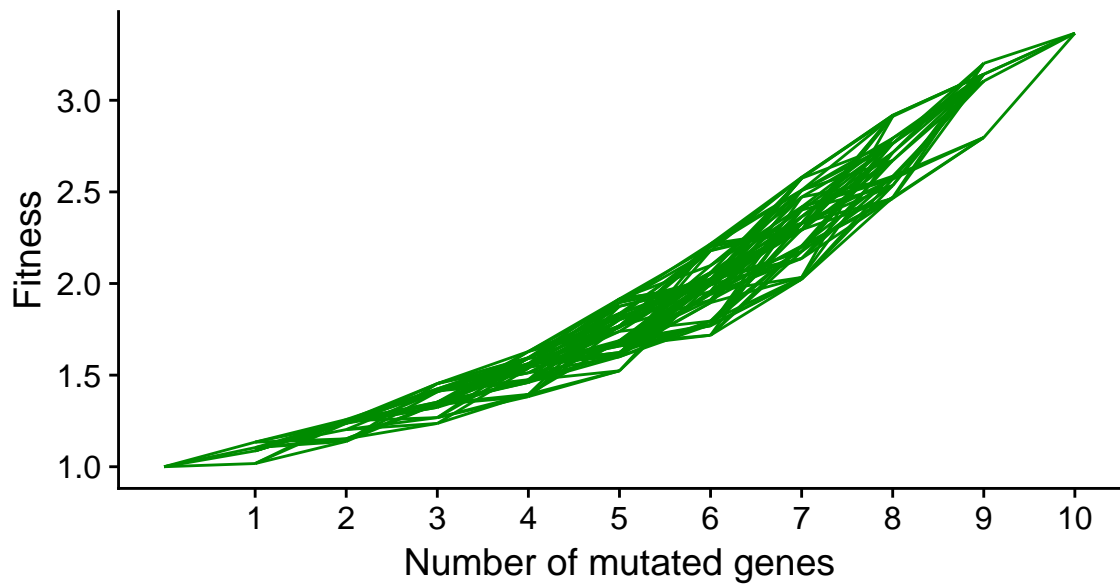

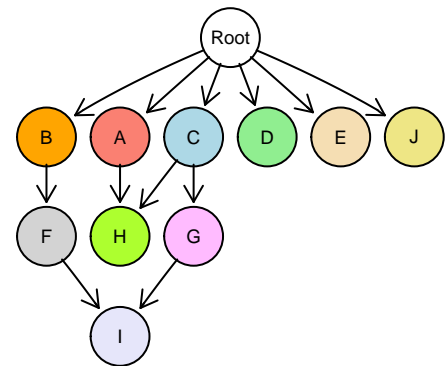

*ID* PVfJTINJUgHLfOjP  
*acc genotypes* 216  
*peaks no back* 1  
*removed edges* 0  
*prop rem edges* 0

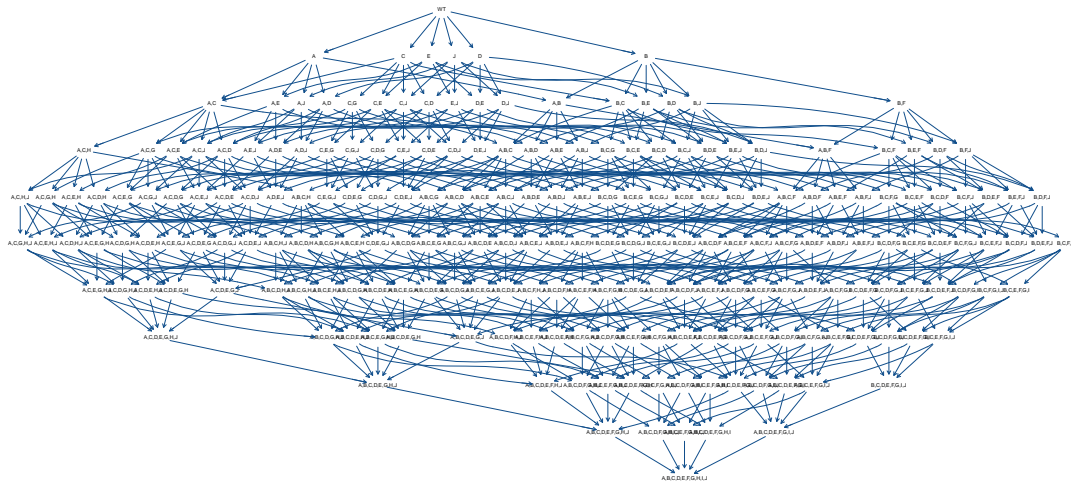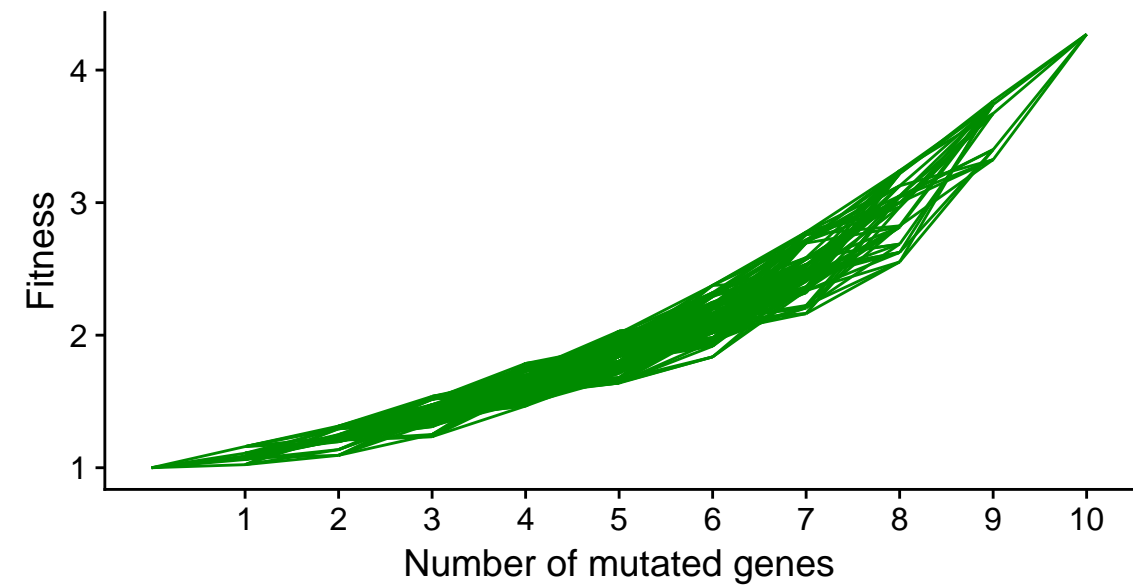

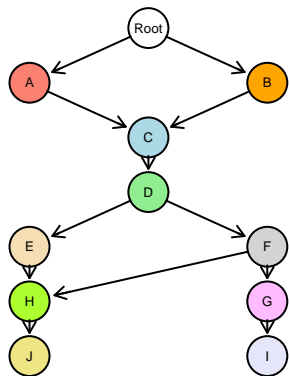

ID pwyaau7tK7LZumPR  
 acc genotypes 19  
 peaks no back 1  
 removed edges 0  
 prop rem edges 0

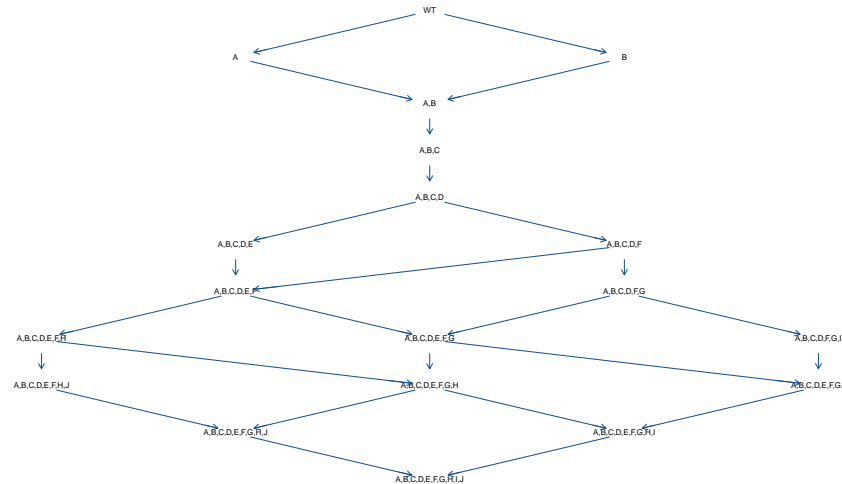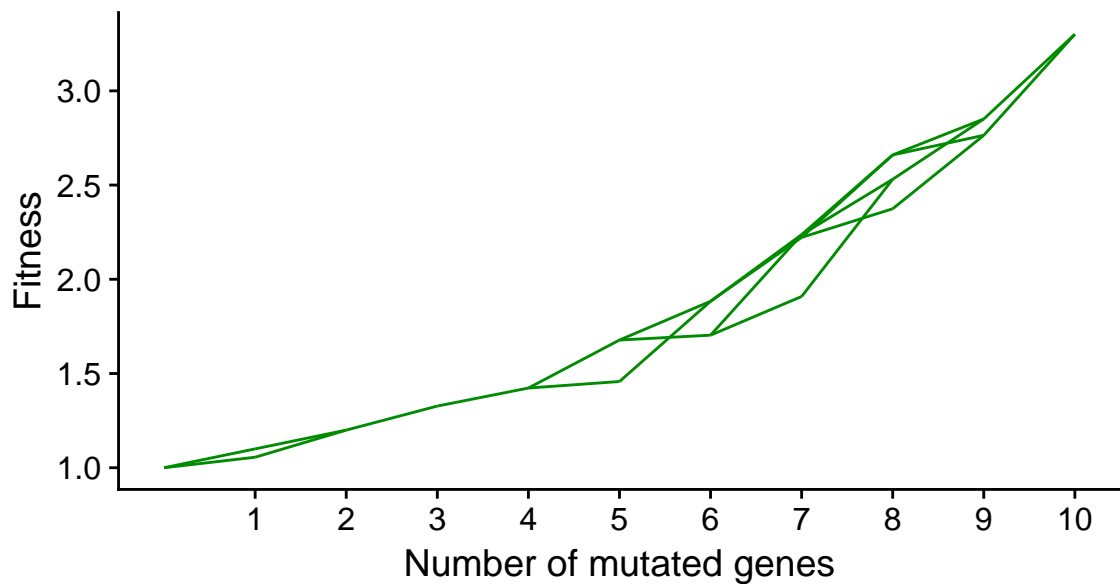



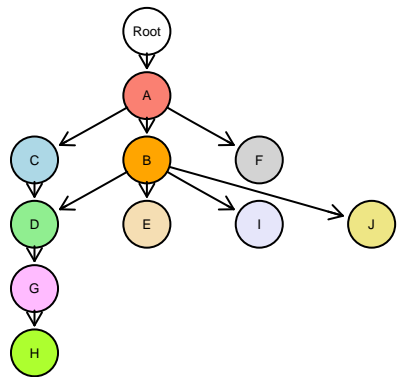

*ID* QePxqp7BQd10uZ5Ko  
*acc genotypes* 85  
*peaks no back* 1  
*removed edges* 0  
*prop rem edges* 0

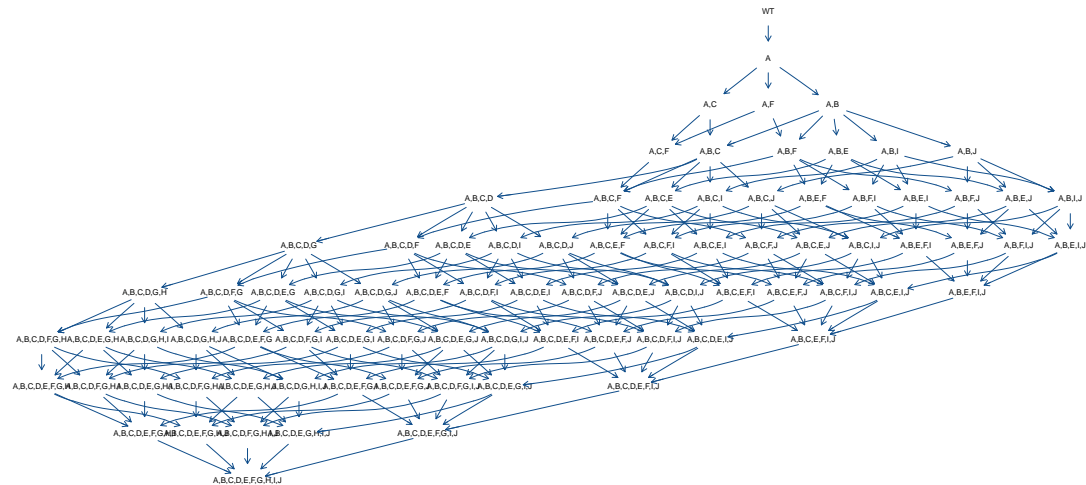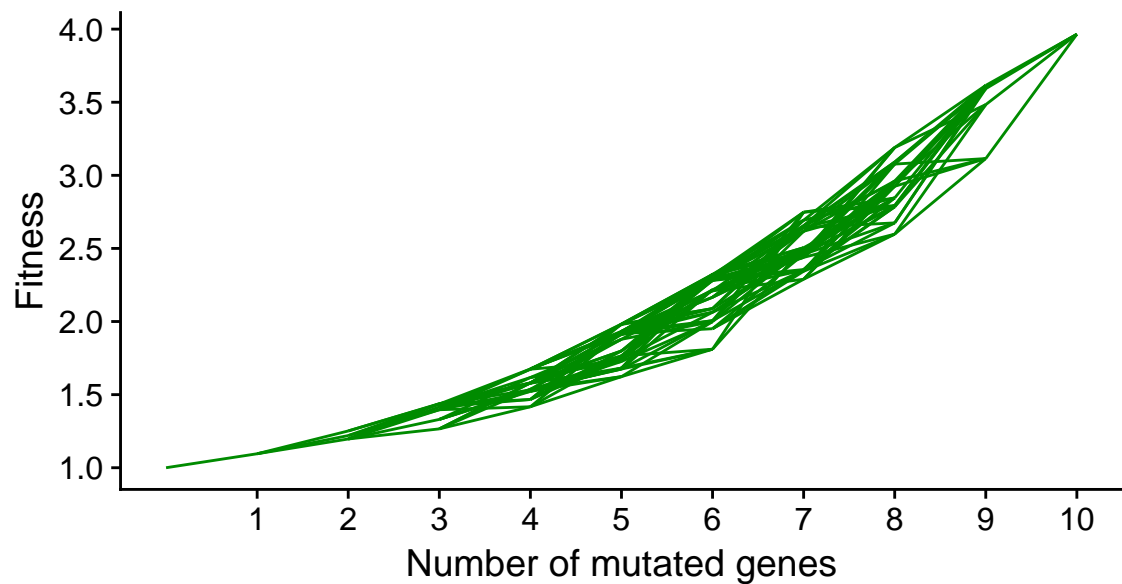

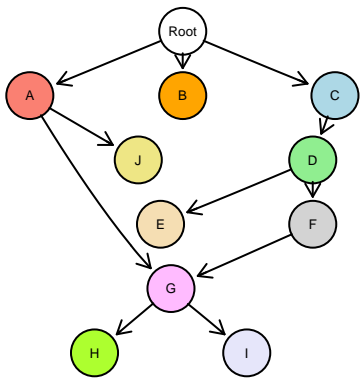

ID **QGRVIBiM3bkC395C**  
 acc genotypes **68**  
 peaks no back **1**  
 removed edges **0**  
 prop rem edges **0**

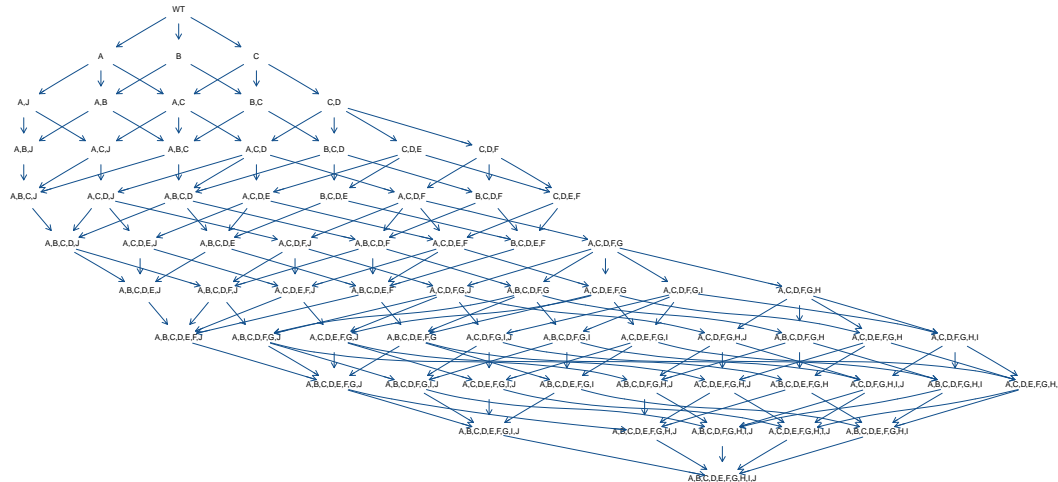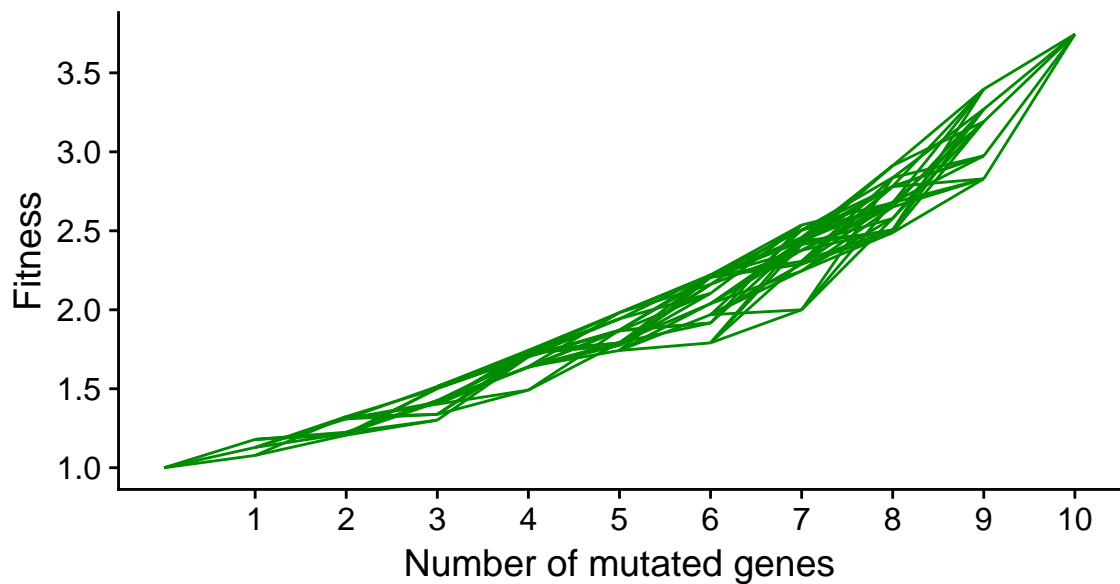

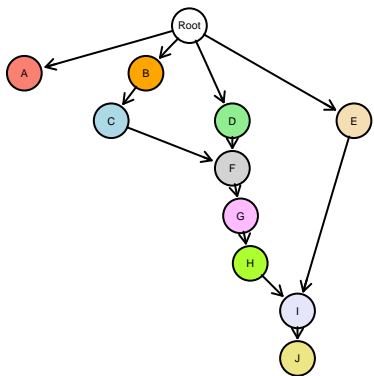

ID Qt7h8PhrOcDVjbUJ  
 acc genotypes 40  
 peaks no back 1  
 removed edges 0  
 prop rem edges 0

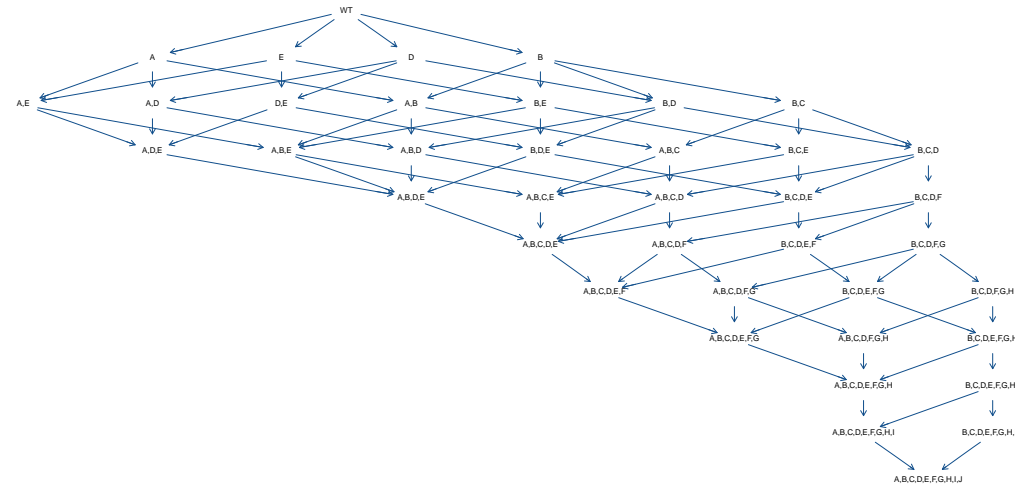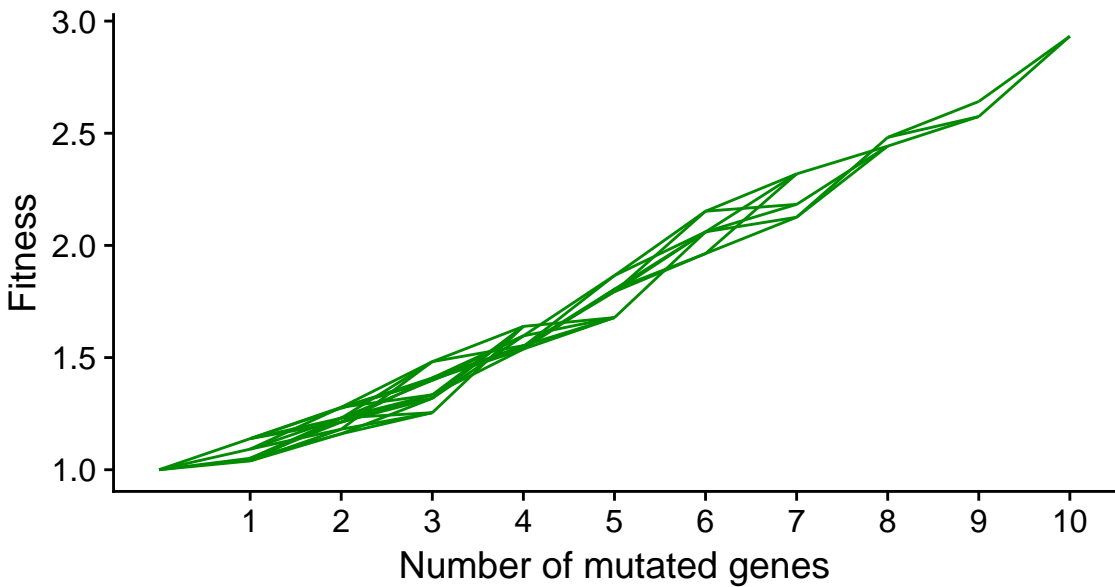

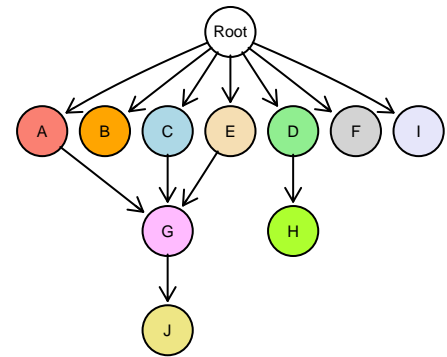

*ID* Rgqi10zX3omumQ9oh  
*acc genotypes* 240  
*peaks no back* 1  
*removed edges* 0  
*prop rem edges* 0

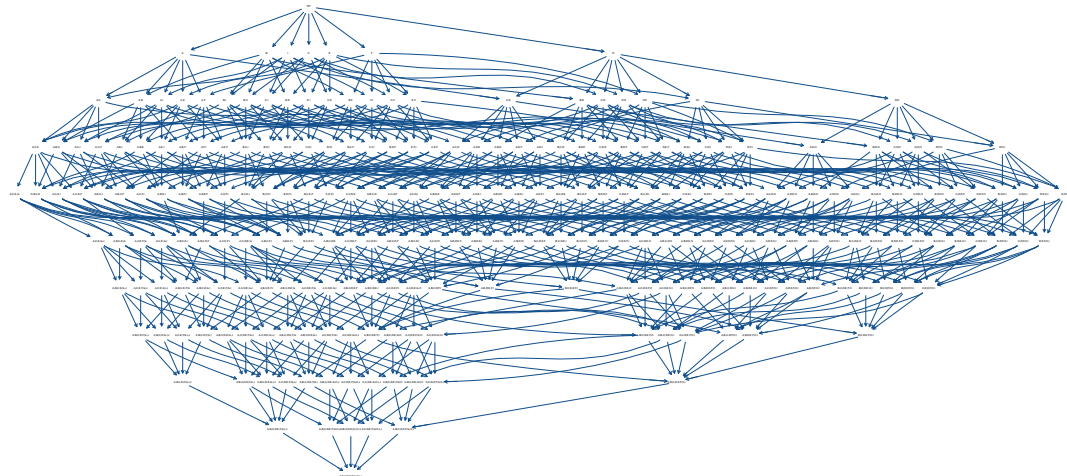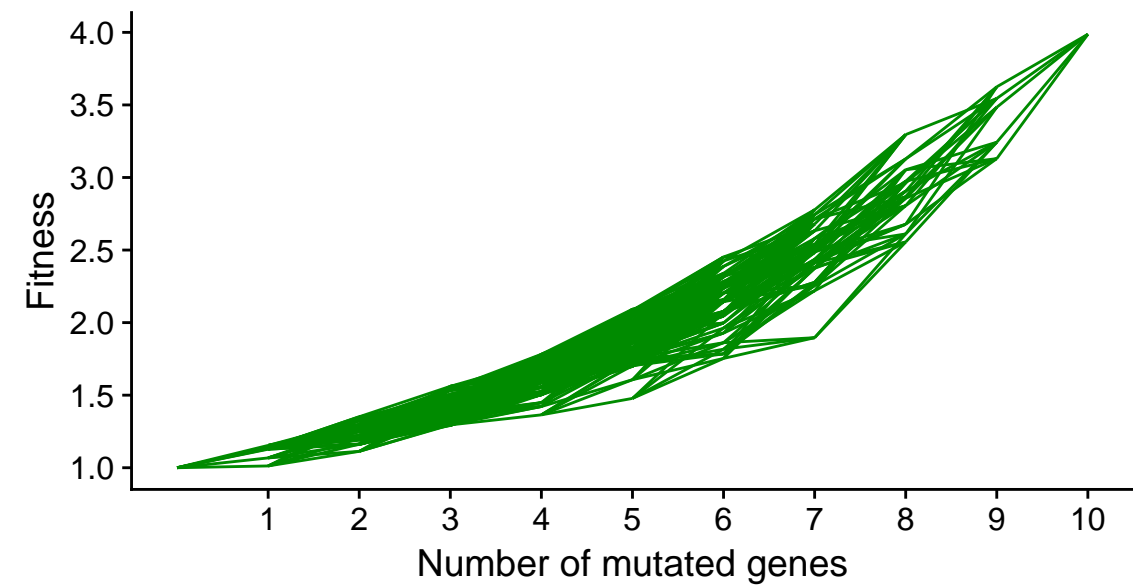

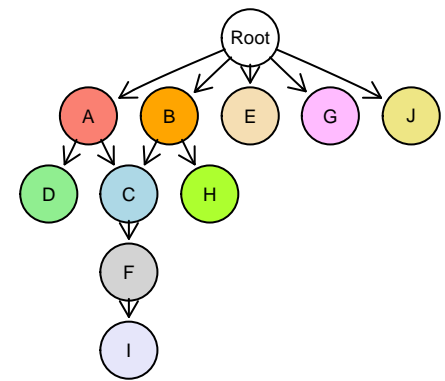

*ID* RHdC3iuVYPR6IBD10  
*acc genotypes* 168  
*peaks no back* 1  
*removed edges* 0  
*prop rem edges* 0

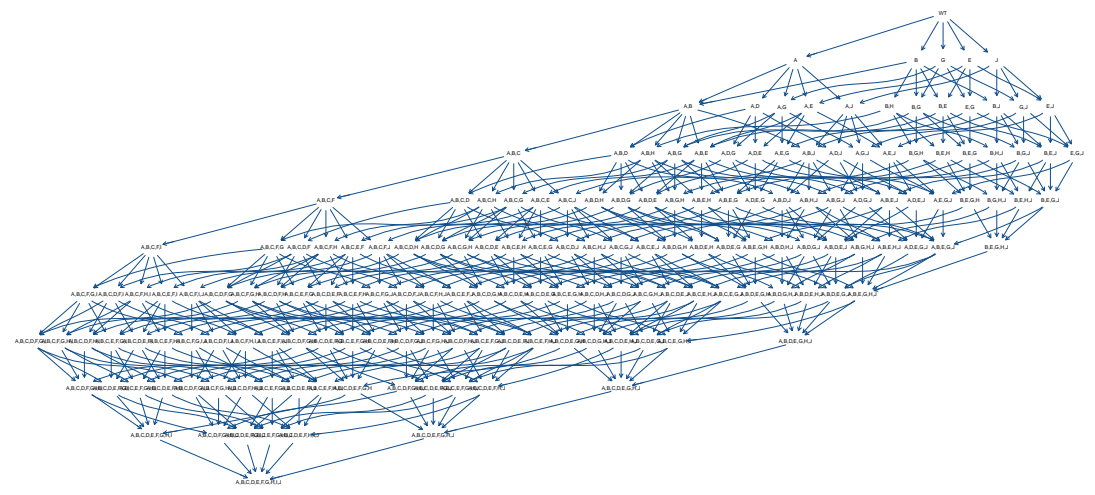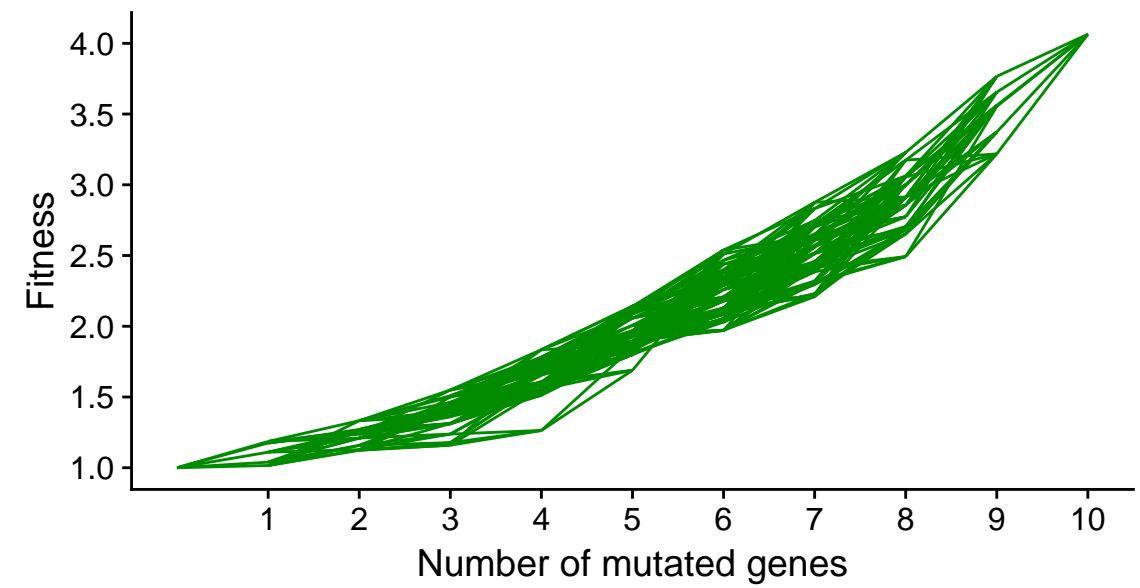

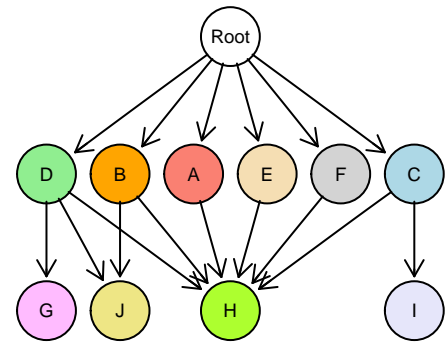

*ID* RM2aZBkyRpQtZvKY  
*acc genotypes* 200  
*peaks no back* 1  
*removed edges* 0  
*prop rem edges* 0

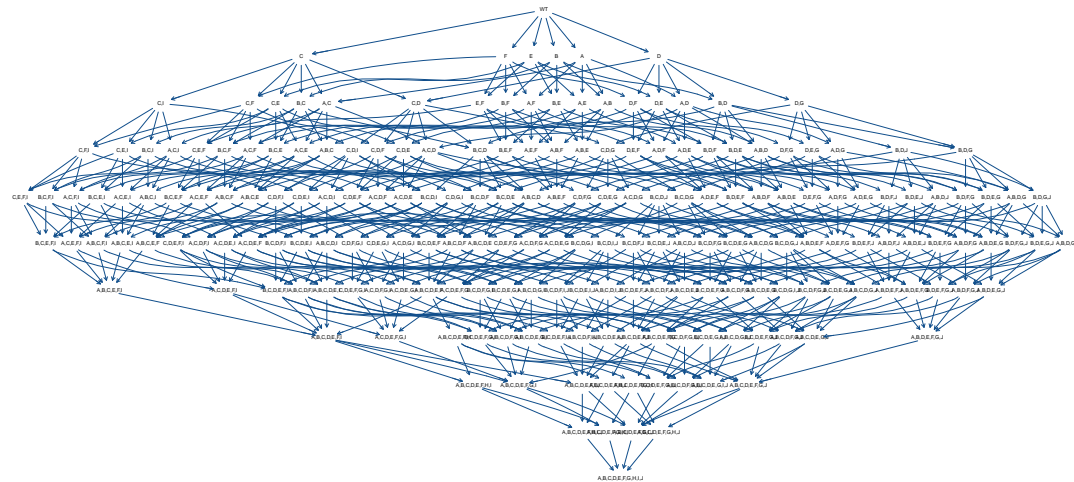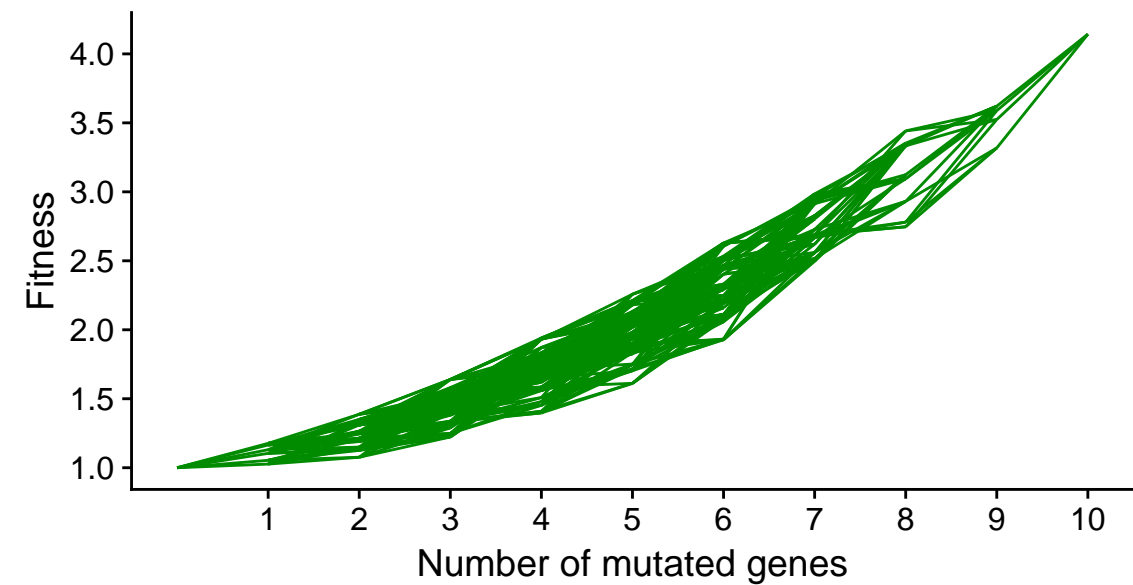

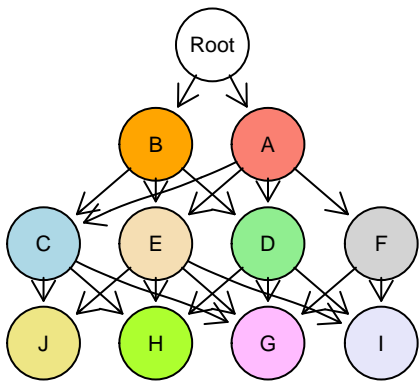

*ID* RNqpQsaM6eeS7RWA  
*acc genotypes* 41  
*peaks no back* 1  
*removed edges* 0  
*prop rem edges* 0

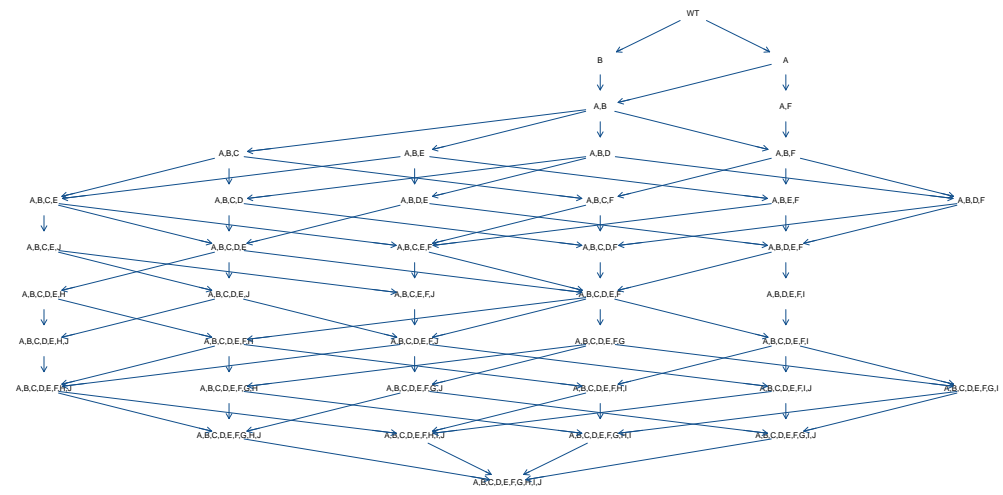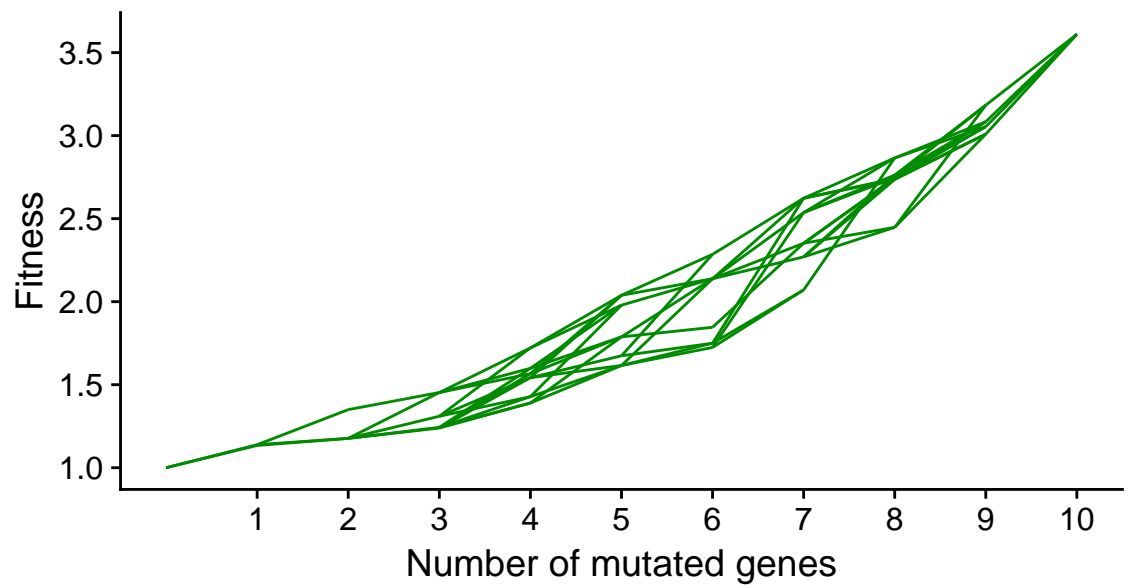

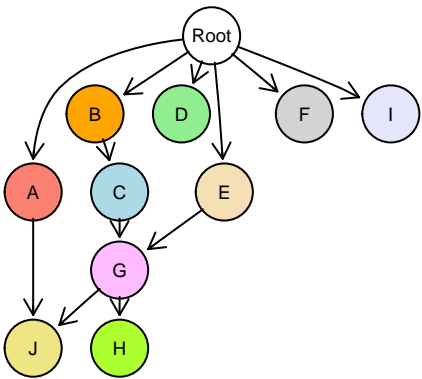

ID rRVesv4UIXP10d31k  
 acc genotypes 144  
 peaks no back 1  
 removed edges 0  
 prop rem edges 0

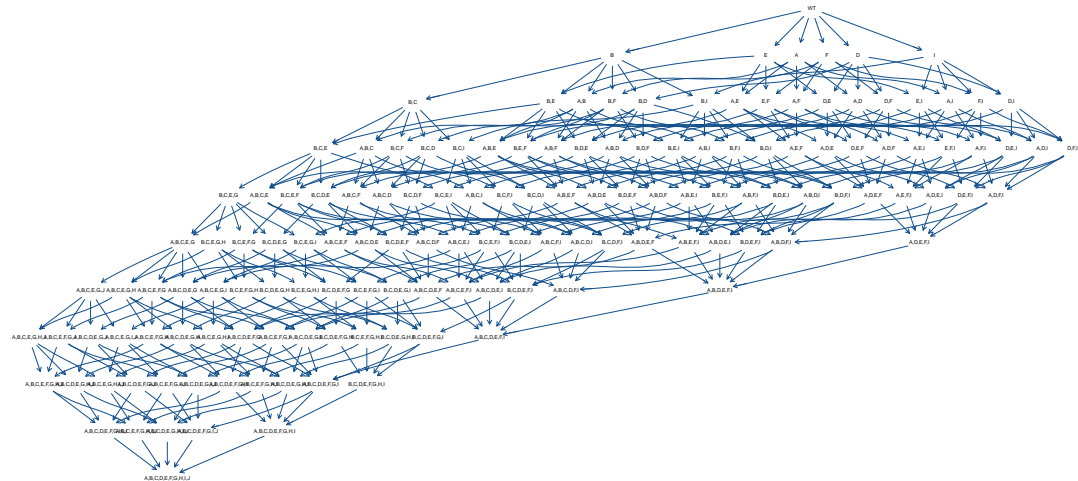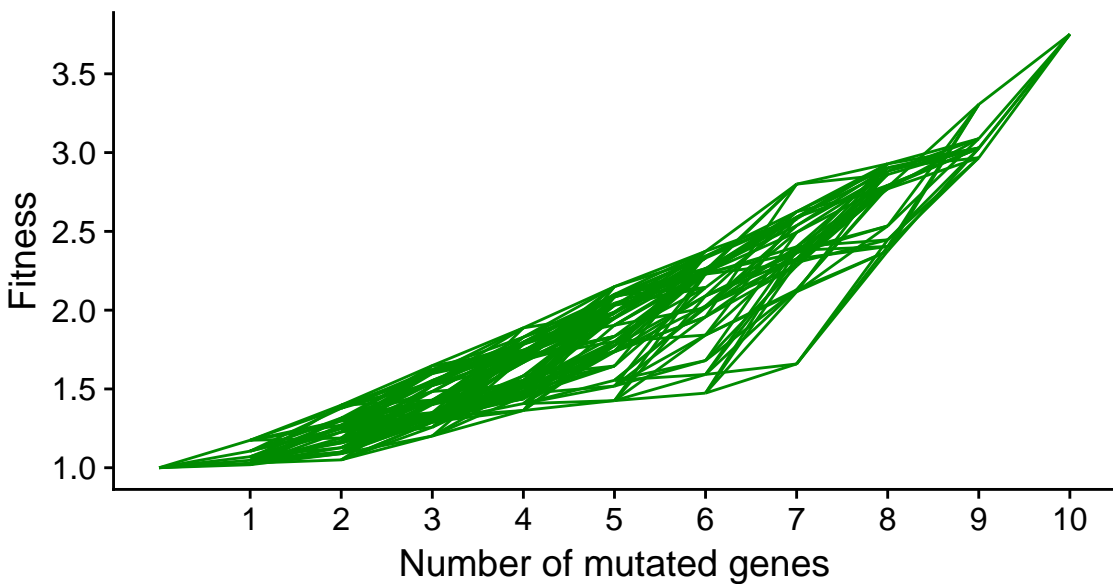



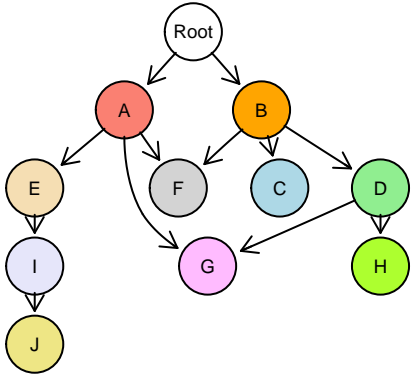

*ID* rsk7tlpjfEVKOLgb  
*acc genotypes* 91  
*peaks no back* 1  
*removed edges* 0  
*prop rem edges* 0

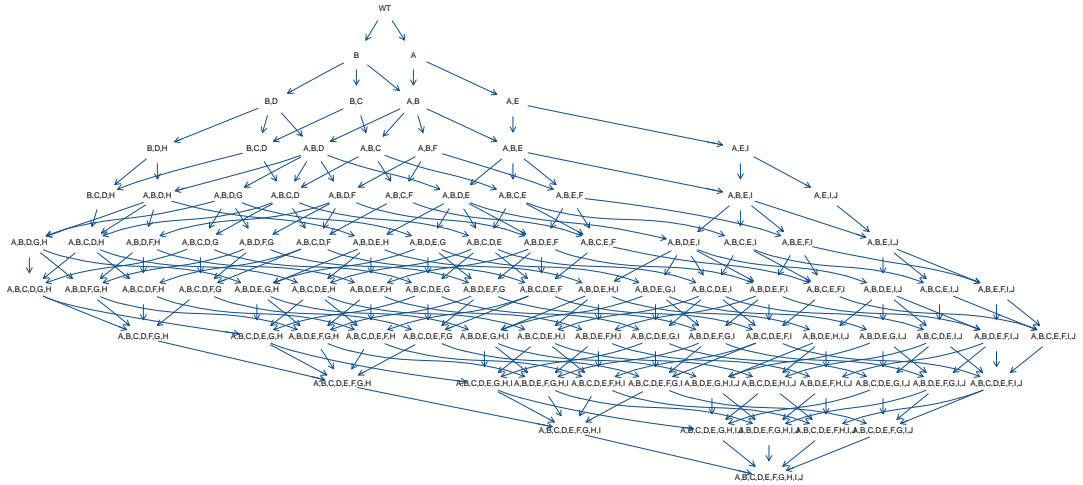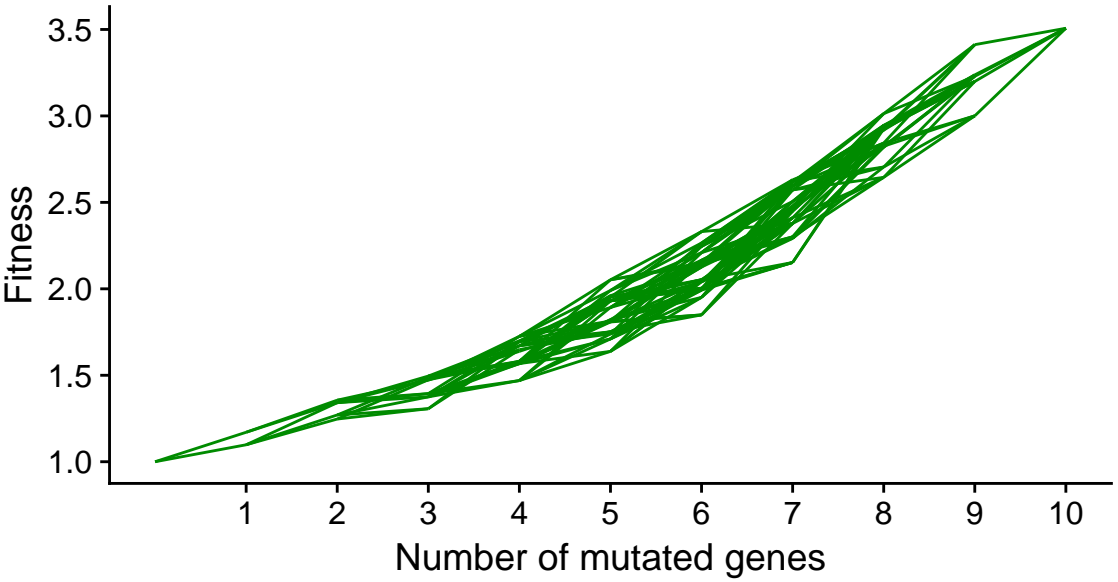

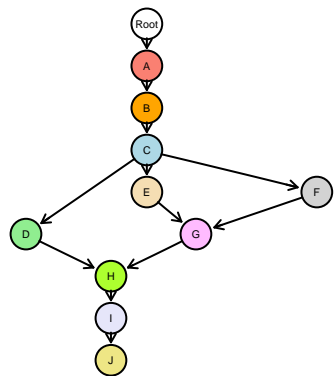

ID **rXEM4KMif4W386fC**  
 acc genotypes **16**  
 peaks no back 1  
 removed edges 0  
 prop rem edges 0

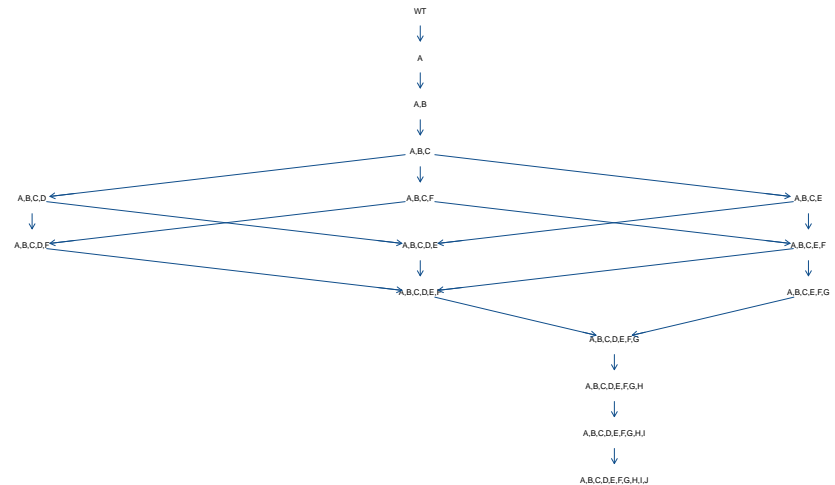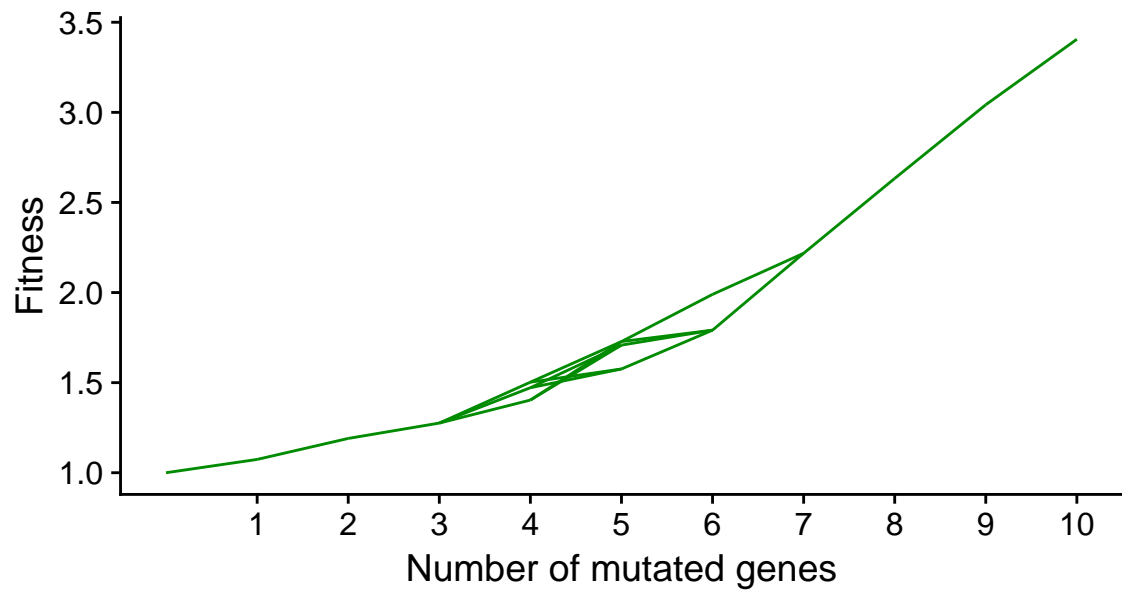

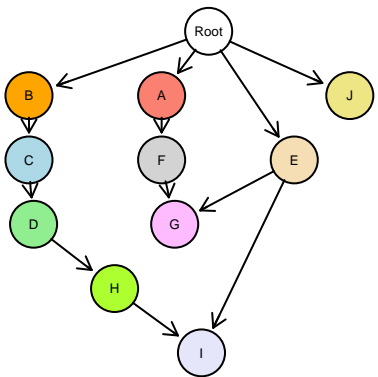

ID **rZYDGyZC7mmbrvG7**  
 acc genotypes **78**  
 peaks no back **1**  
 removed edges **0**  
 prop rem edges **0**

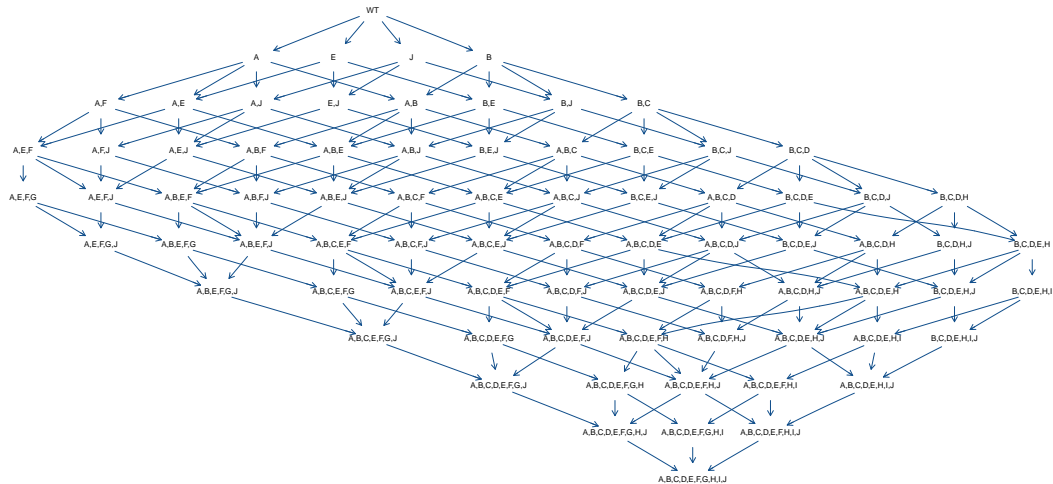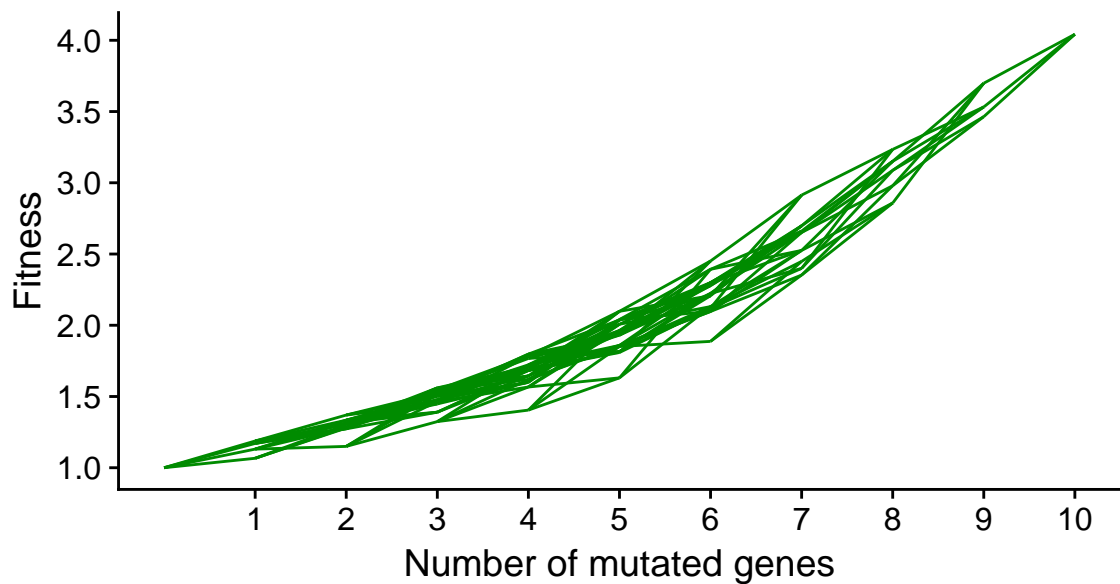

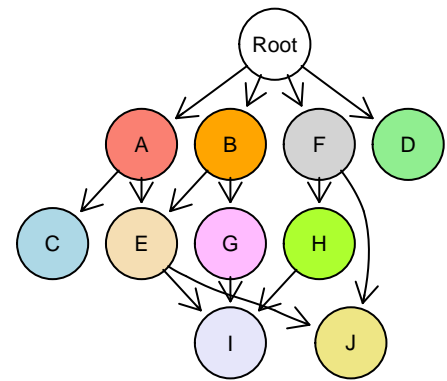

ID **sH934jpdq10yYeSf**  
 acc genotypes **102**  
 peaks no back **1**  
 removed edges **0**  
 prop rem edges **0**

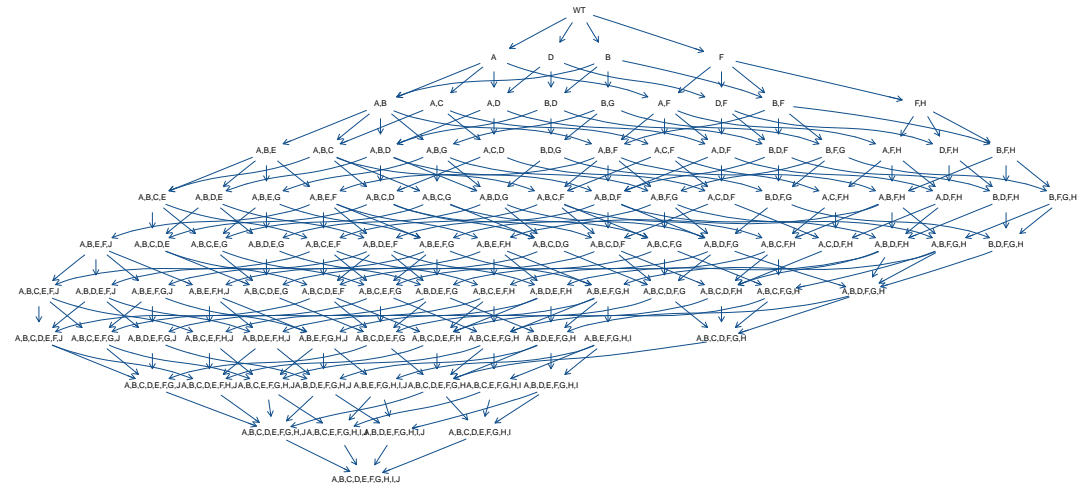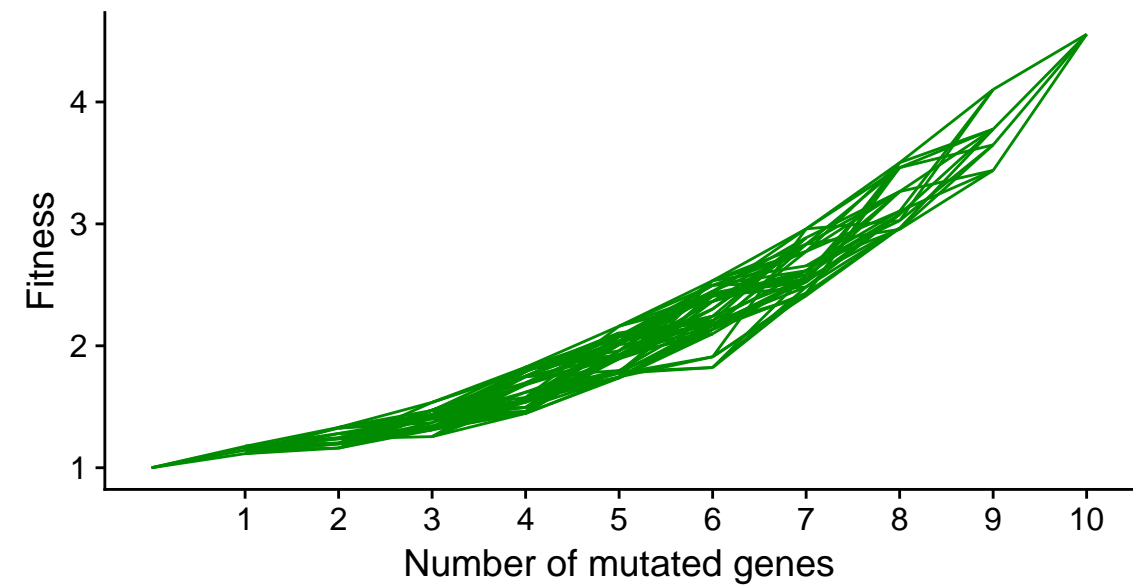

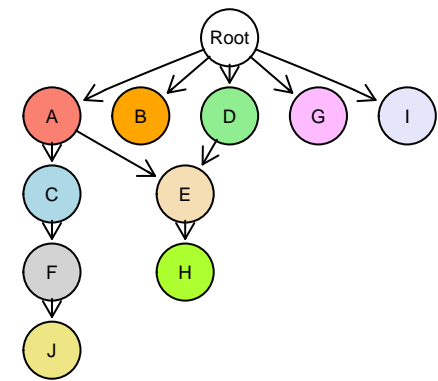

ID **sisQewhG7QPpthsD**  
 acc genotypes **144**  
 peaks no back 1  
 removed edges 0  
 prop rem edges 0

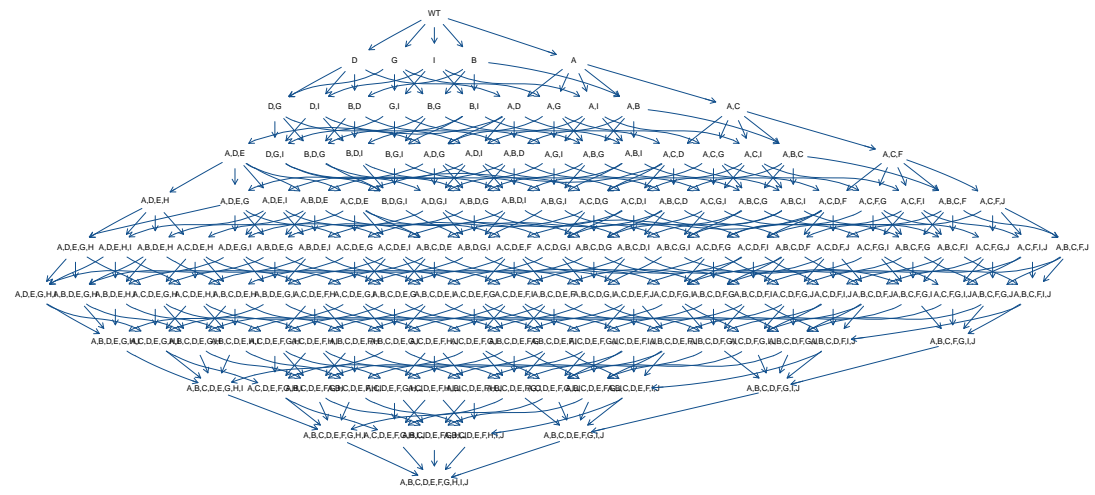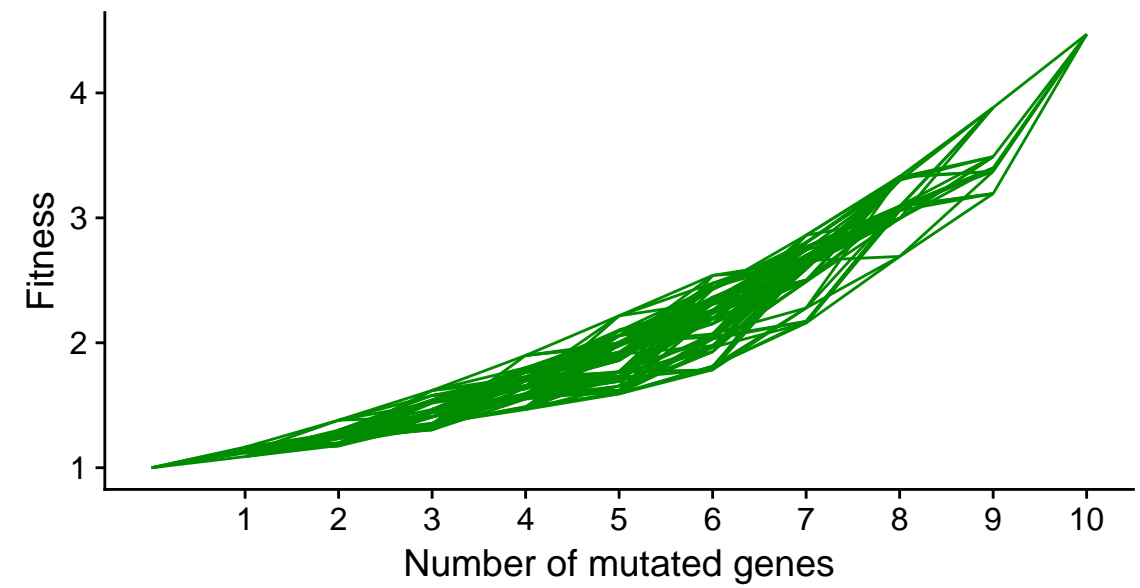

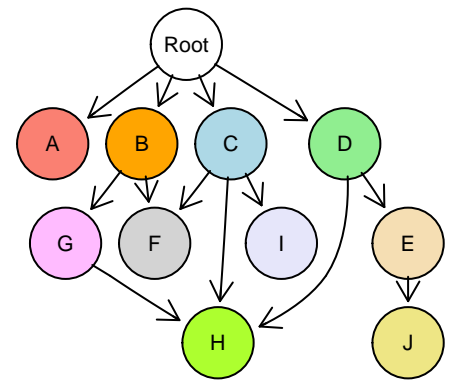

*ID* sNgShm95dlSfotH4  
*acc genotypes* 128  
*peaks no back* 1  
*removed edges* 0  
*prop rem edges* 0

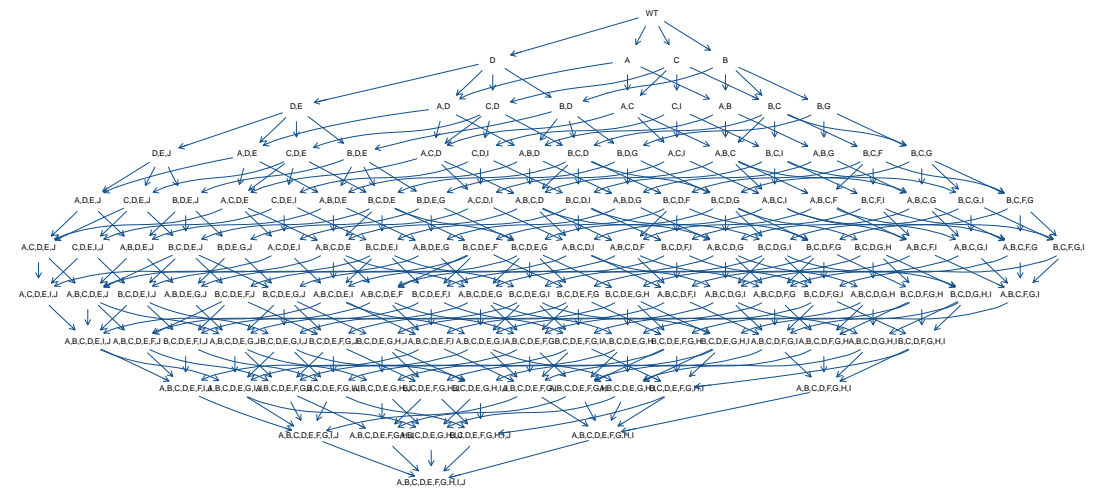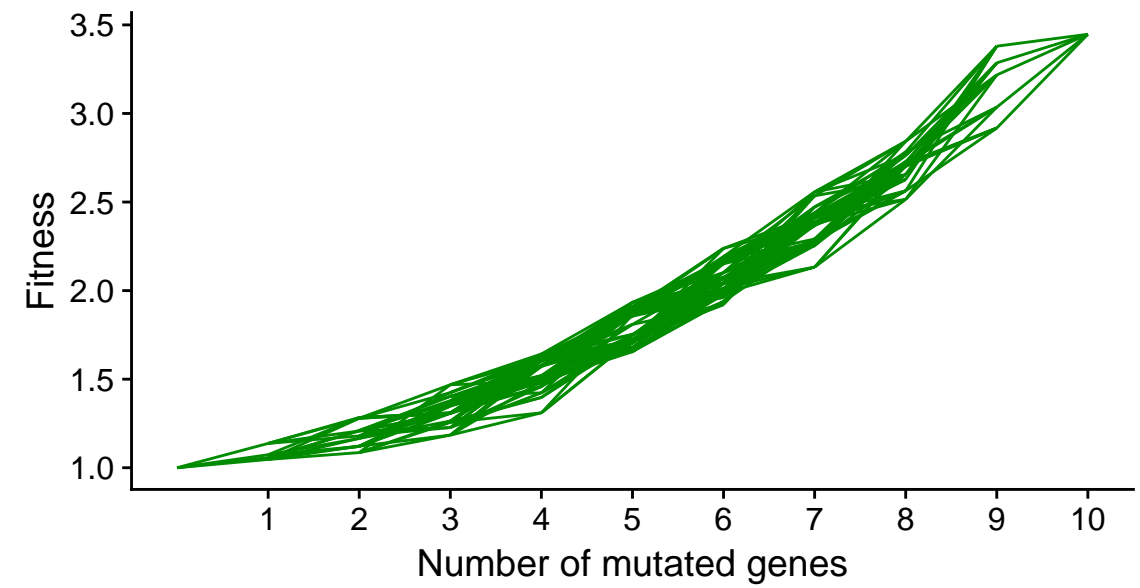

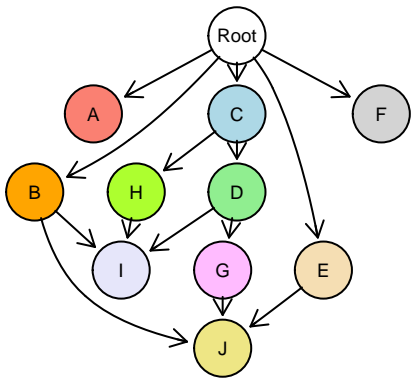

*ID* sQiN7joZyxfMKsXn  
*acc genotypes* 140  
*peaks no back* 1  
*removed edges* 0  
*prop rem edges* 0

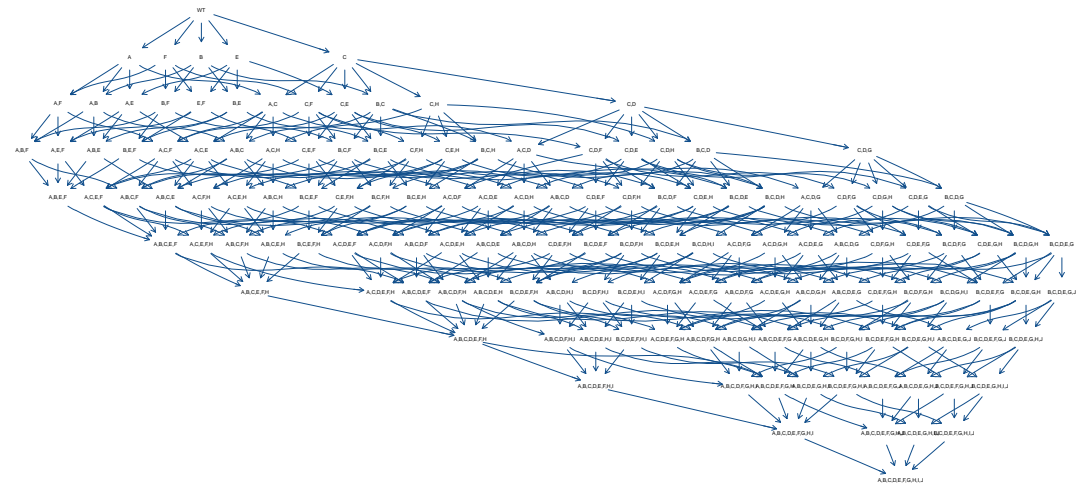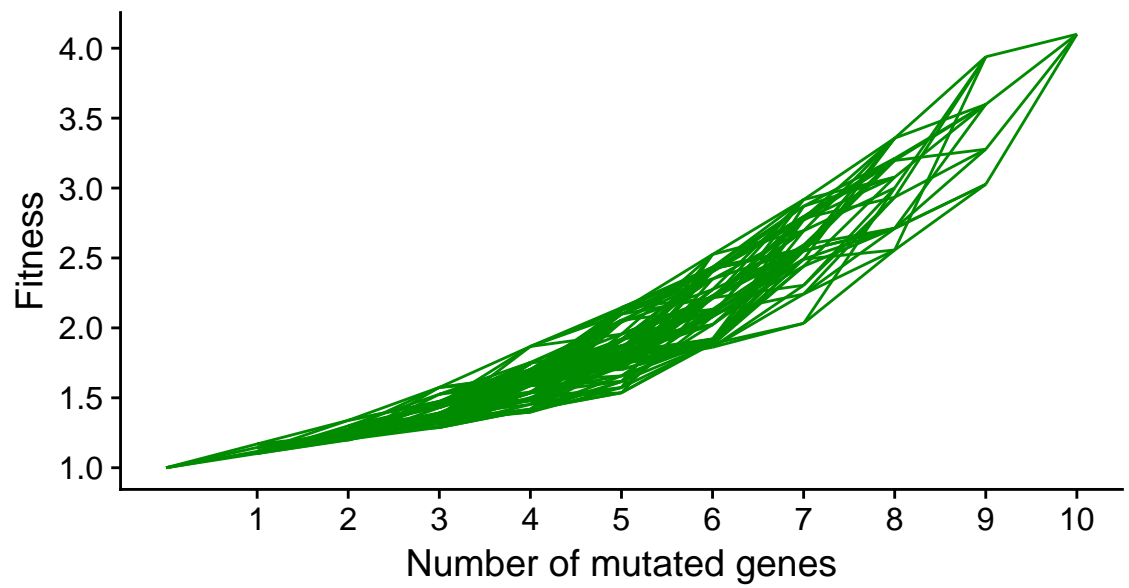

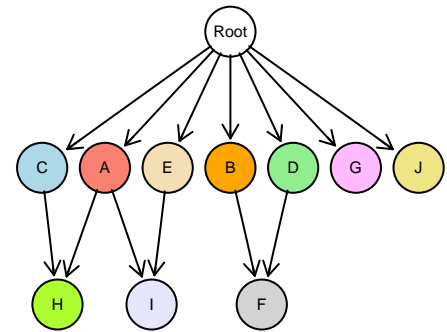

*ID* sUfgZw6OOPt5SCir  
*acc genotypes* 260  
*peaks no back* 1  
*removed edges* 0  
*prop rem edges* 0

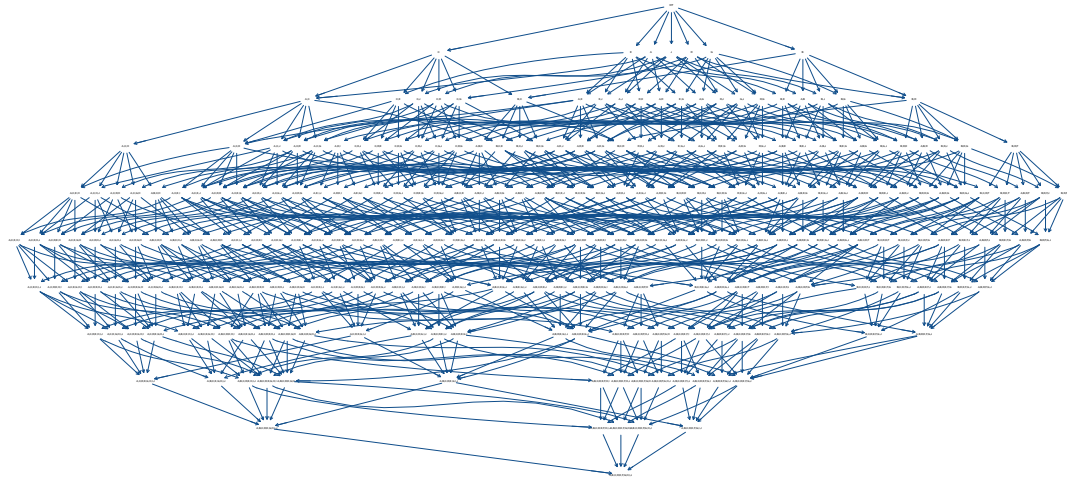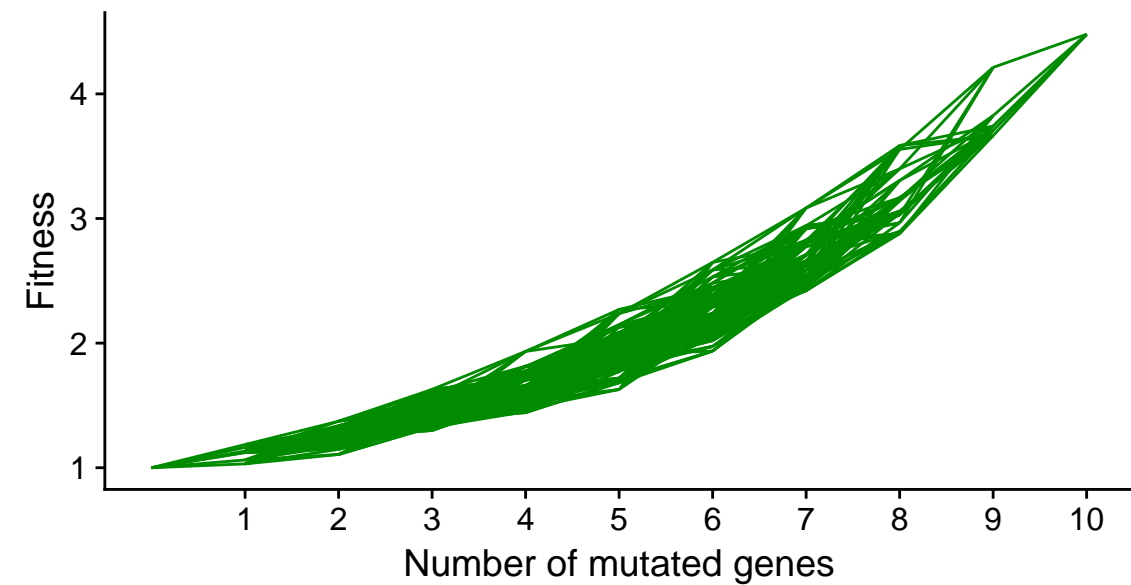



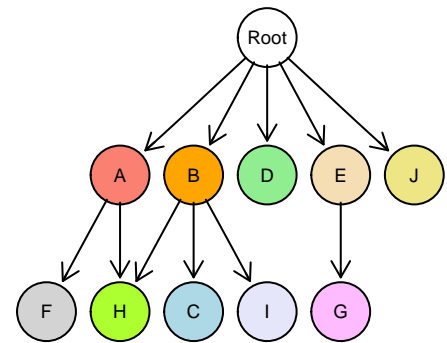

*ID* svUNVWKM4yHG4ZG6  
*acc genotypes* 276  
*peaks no back* 1  
*removed edges* 0  
*prop rem edges* 0

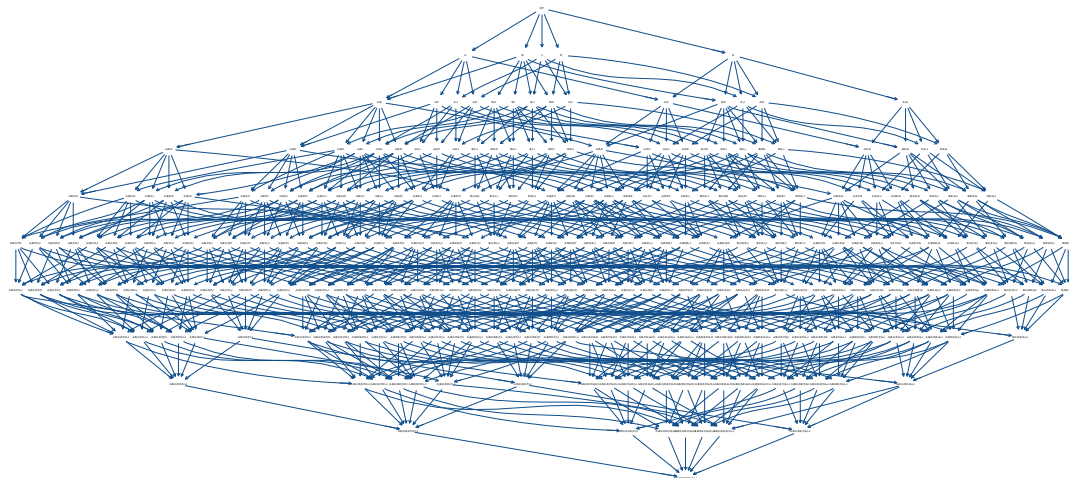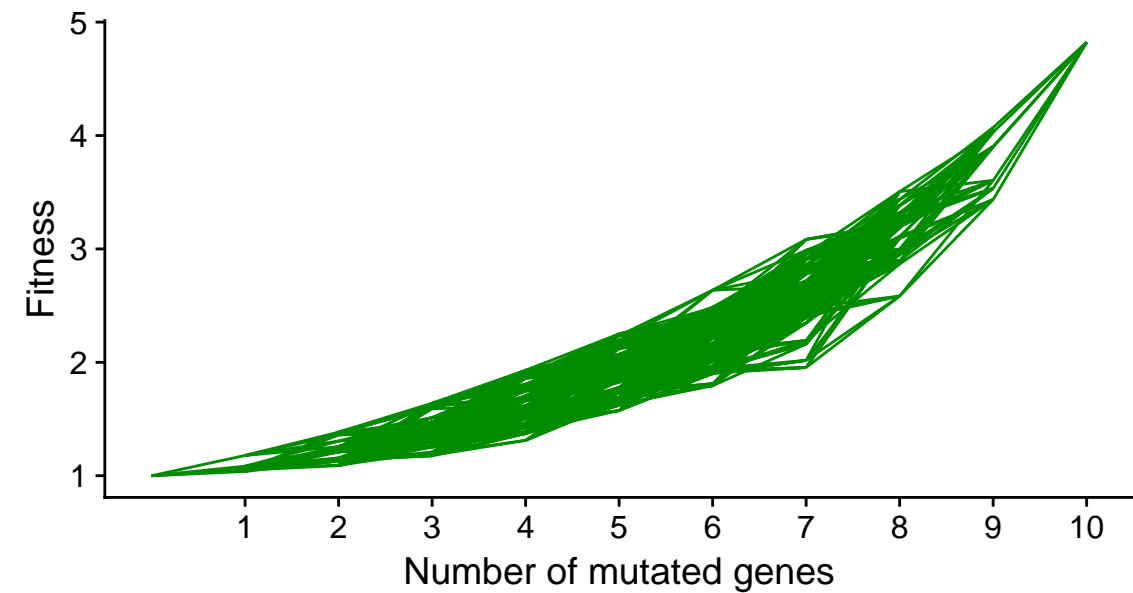

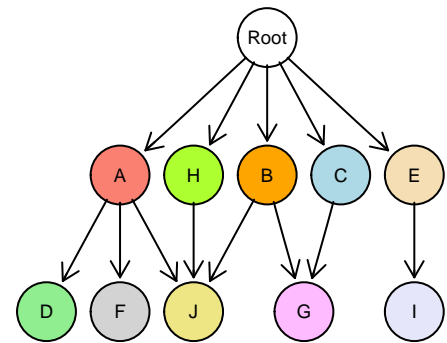

*ID* **tbhoAhVYmdTD8tmZ**  
*acc genotypes* **186**  
*peaks no back* **1**  
*removed edges* **0**  
*prop rem edges* **0**

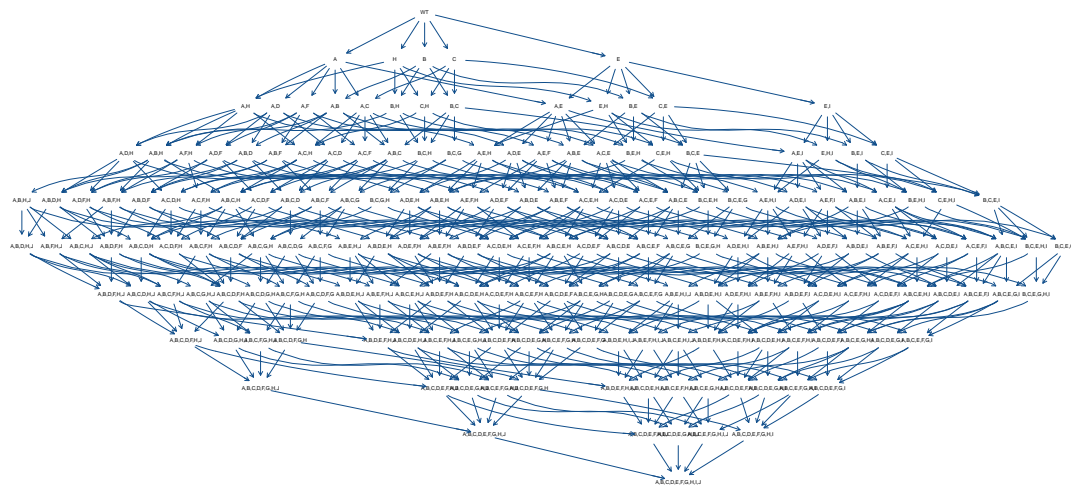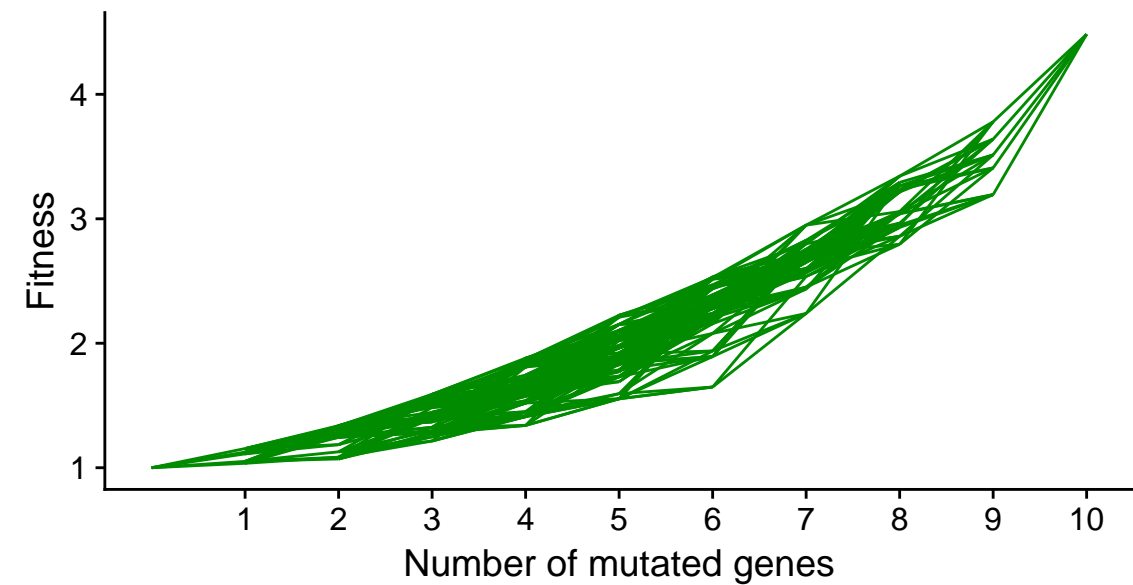

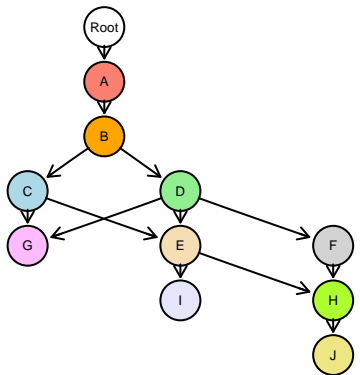

ID TFxs2KpM5WO9Abi10  
 acc genotypes 26  
 peaks no back 1  
 removed edges 0  
 prop rem edges 0

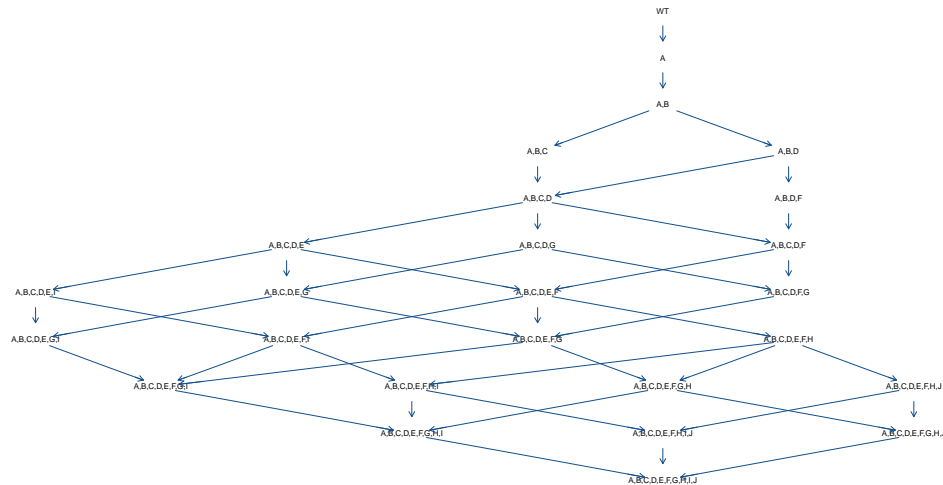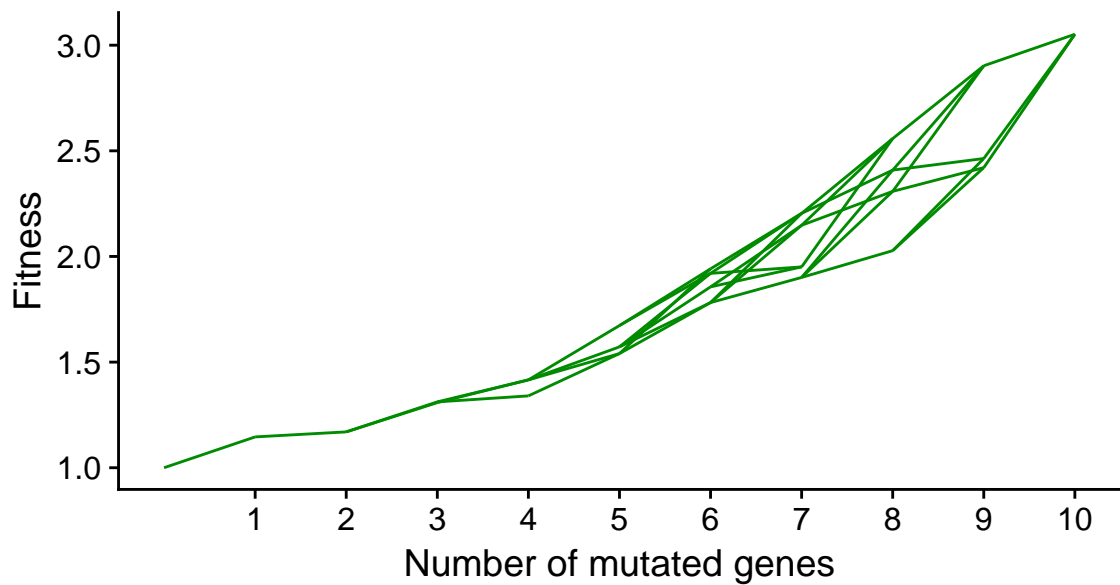

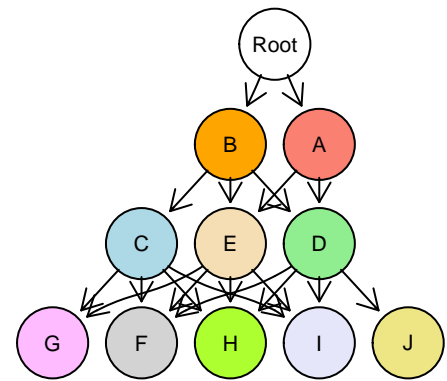

*ID* TH4wayDxtpPQJ3zV  
*acc genotypes* 47  
*peaks no back* 1  
*removed edges* 0  
*prop rem edges* 0

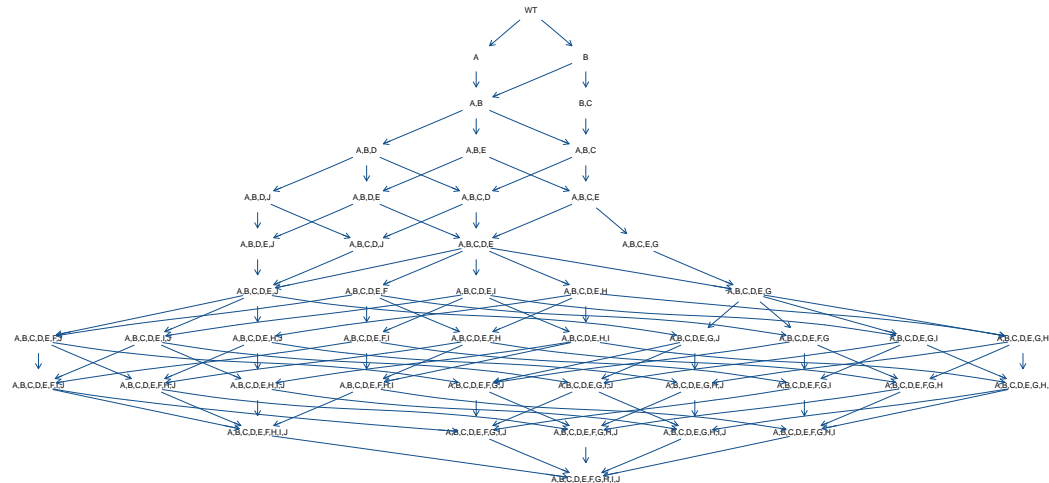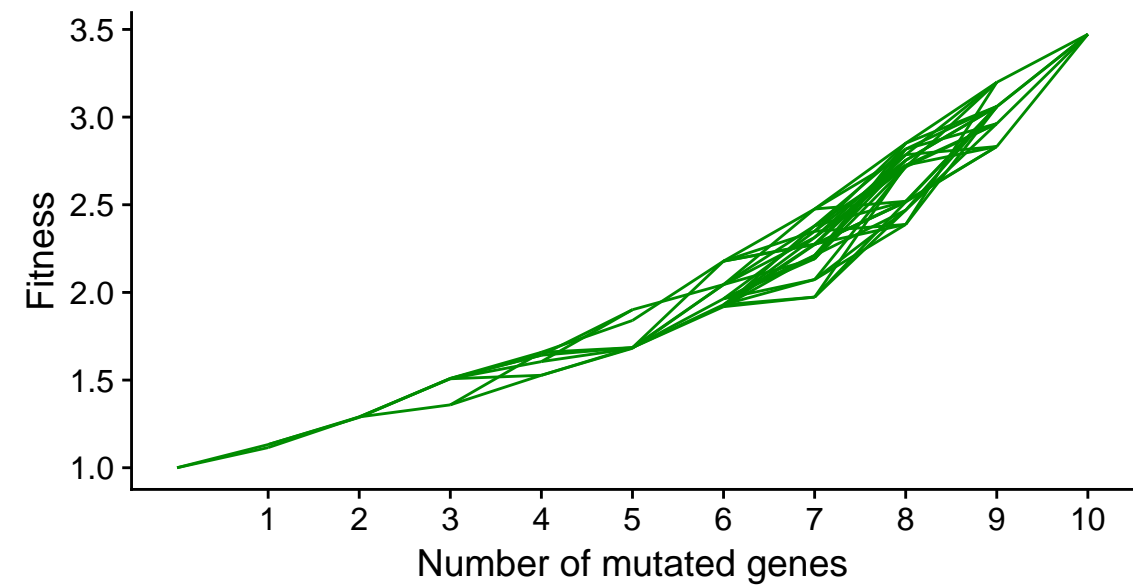

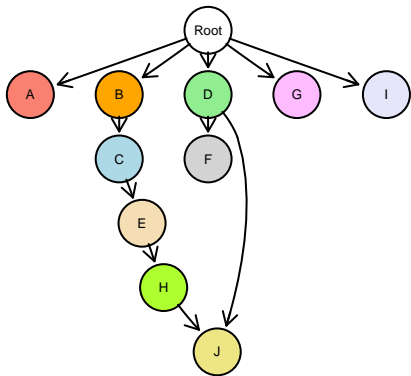

ID **t17D6tCILmHkt9fG**  
 acc genotypes **136**  
 peaks no back 1  
 removed edges 0  
 prop rem edges 0

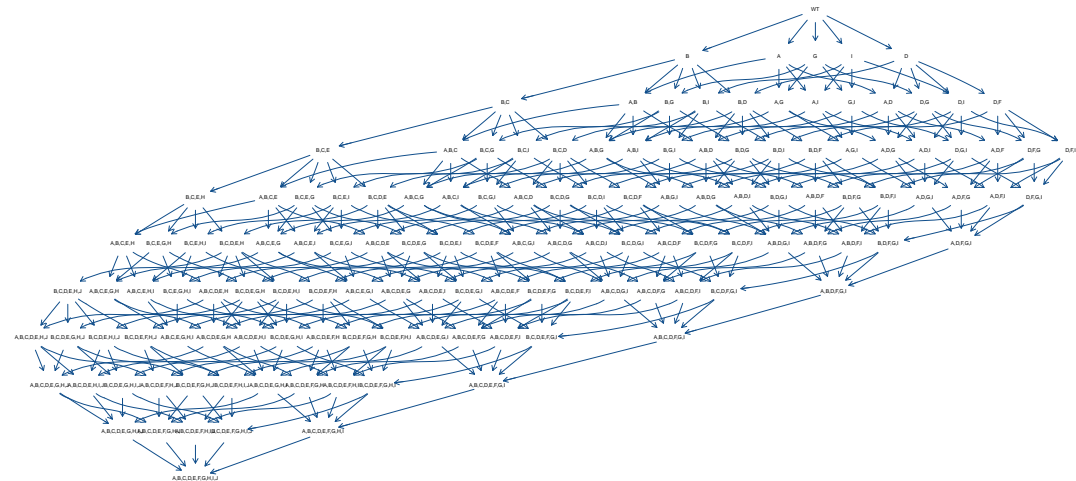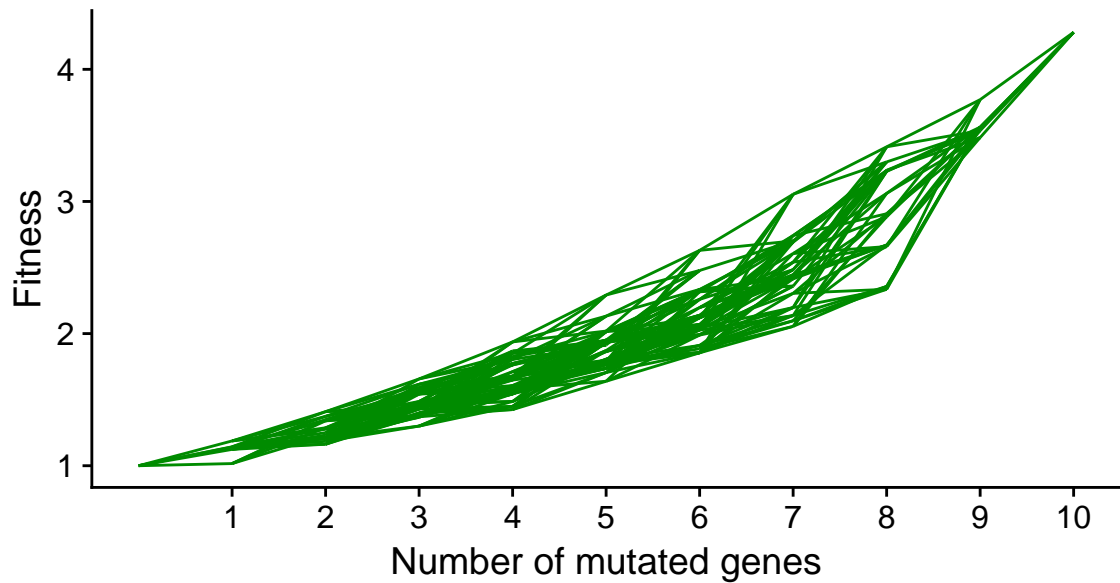

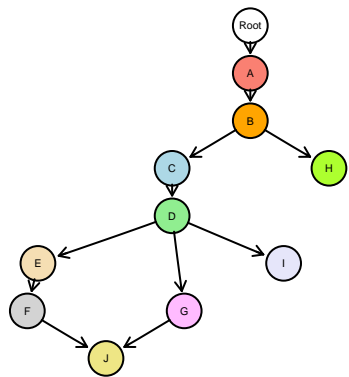

ID **tq7jgfG17AM4IqGW**  
 acc genotypes **34**  
 peaks no back **1**  
 removed edges **0**  
 prop rem edges **0**

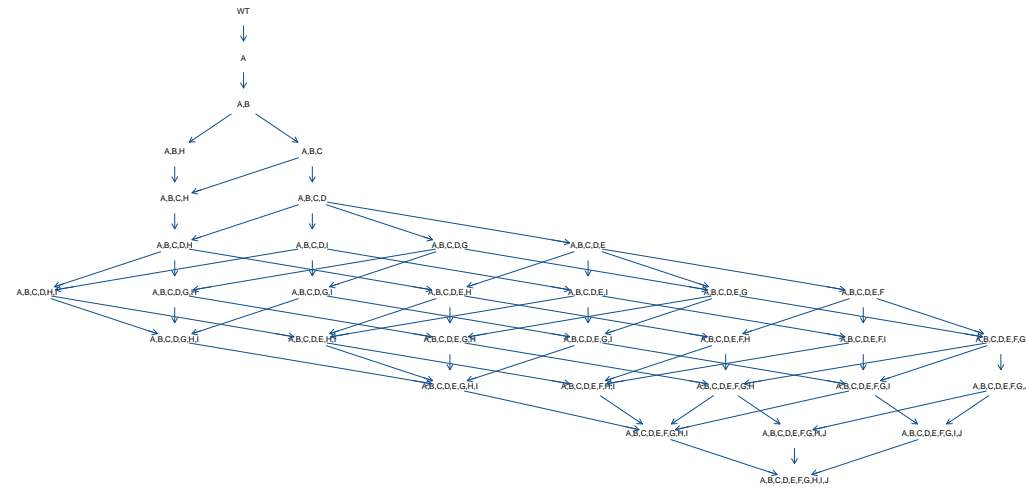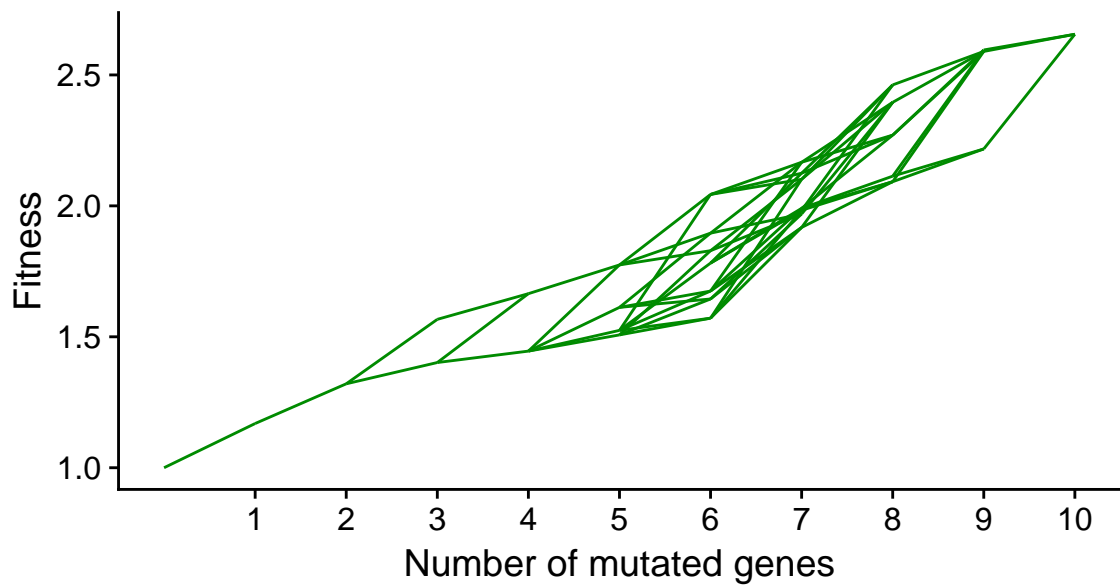

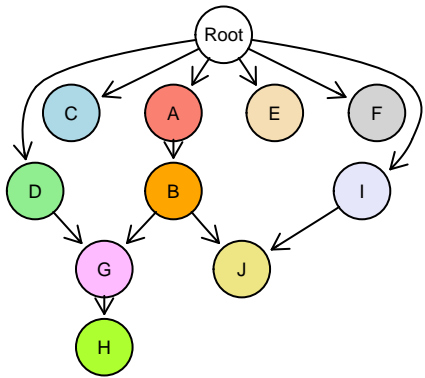

*ID* TVJsMGLUm85XS67g  
*acc genotypes* 160  
*peaks no back* 1  
*removed edges* 0  
*prop rem edges* 0

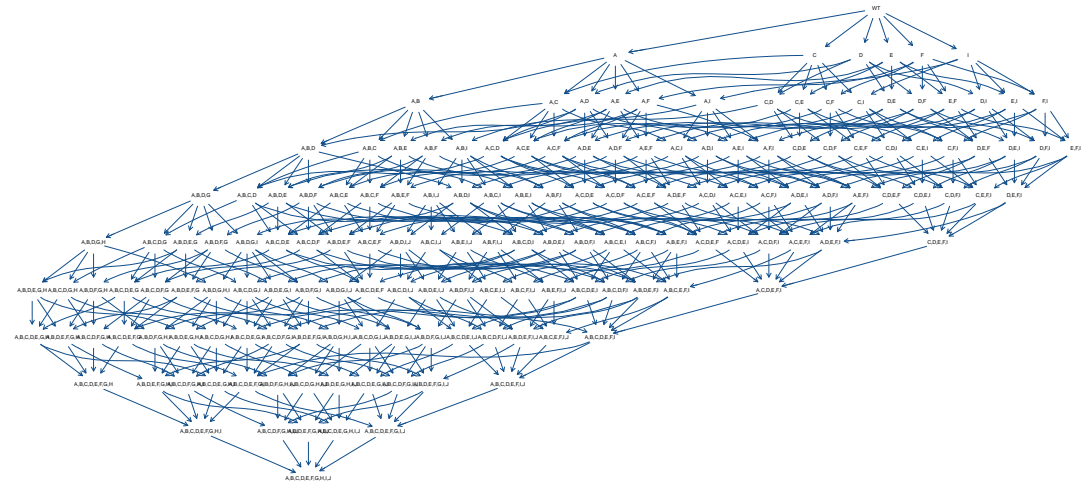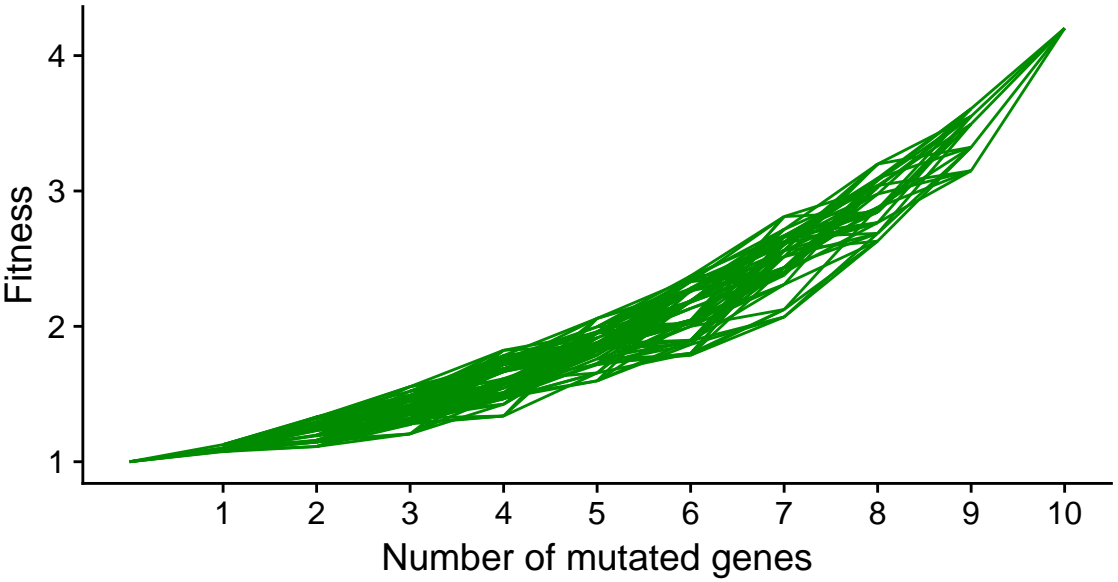

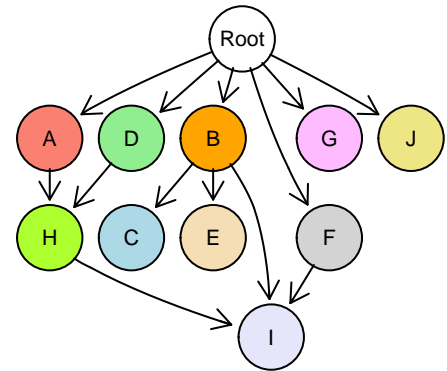

ID TXSYGzi7tgHRqH7B  
 acc genotypes 216  
 peaks no back 1  
 removed edges 0  
 prop rem edges 0

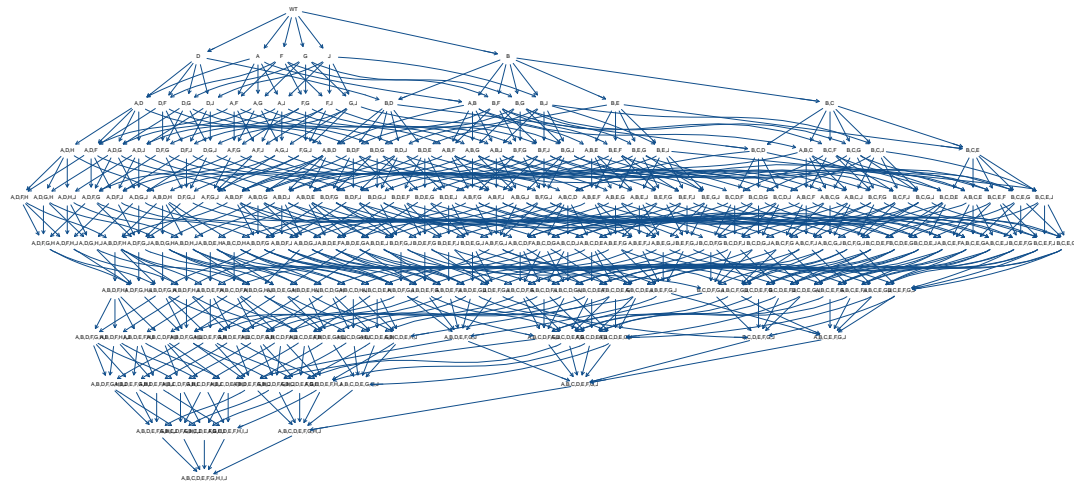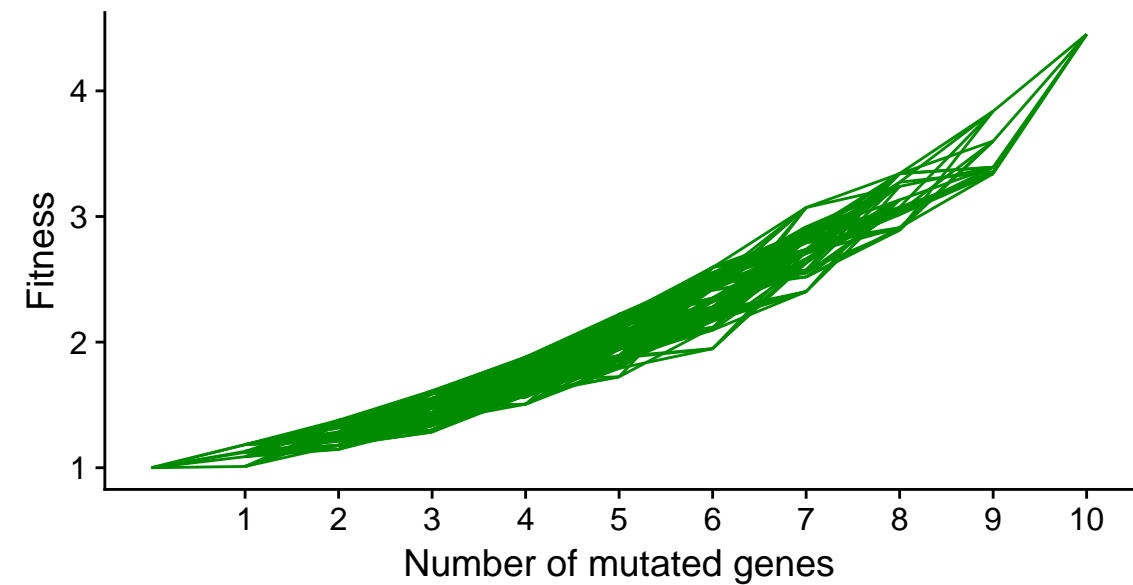



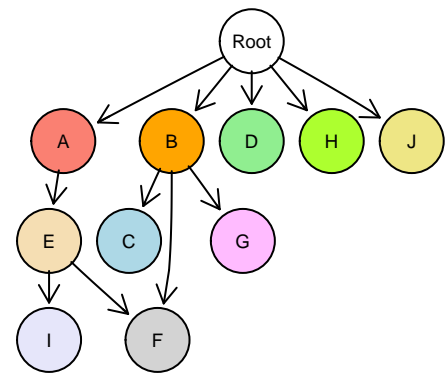

*ID* u1Pu1FhBeoVLcUwQ  
*acc genotypes* 224  
*peaks no back* 1  
*removed edges* 0  
*prop rem edges* 0

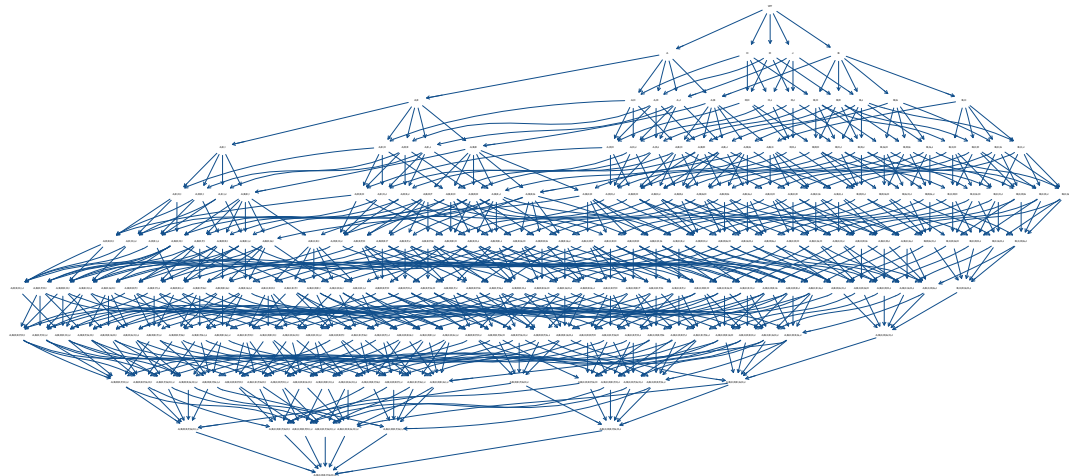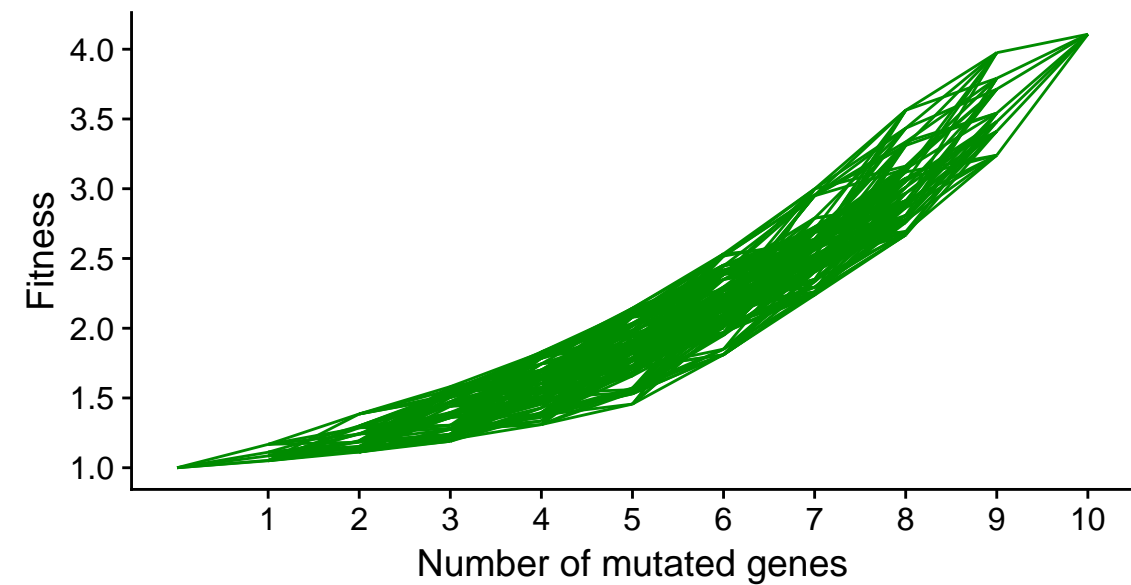

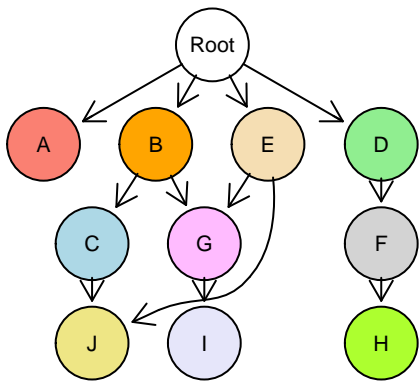

*ID* u7NcTlp7H7vgrd6Z  
*acc genotypes* 104  
*peaks no back* 1  
*removed edges* 0  
*prop rem edges* 0

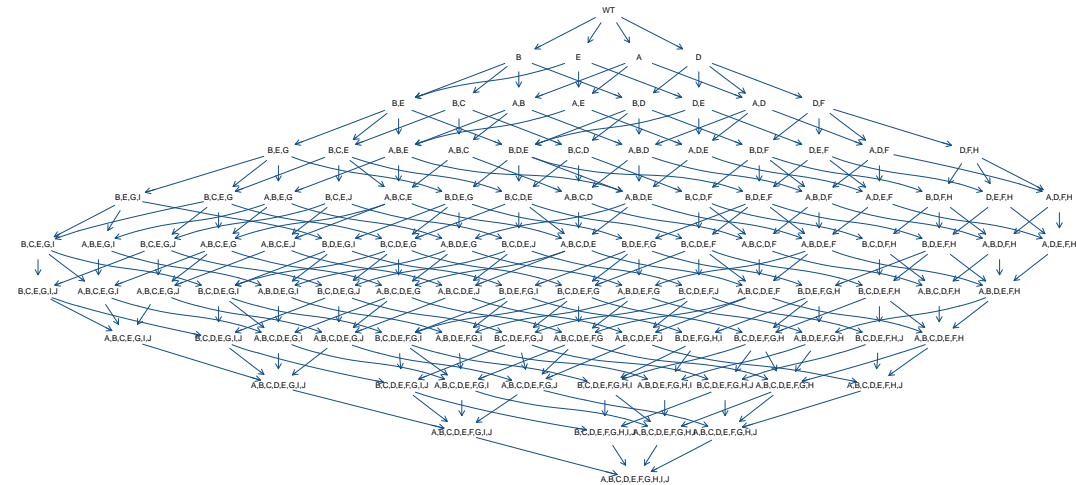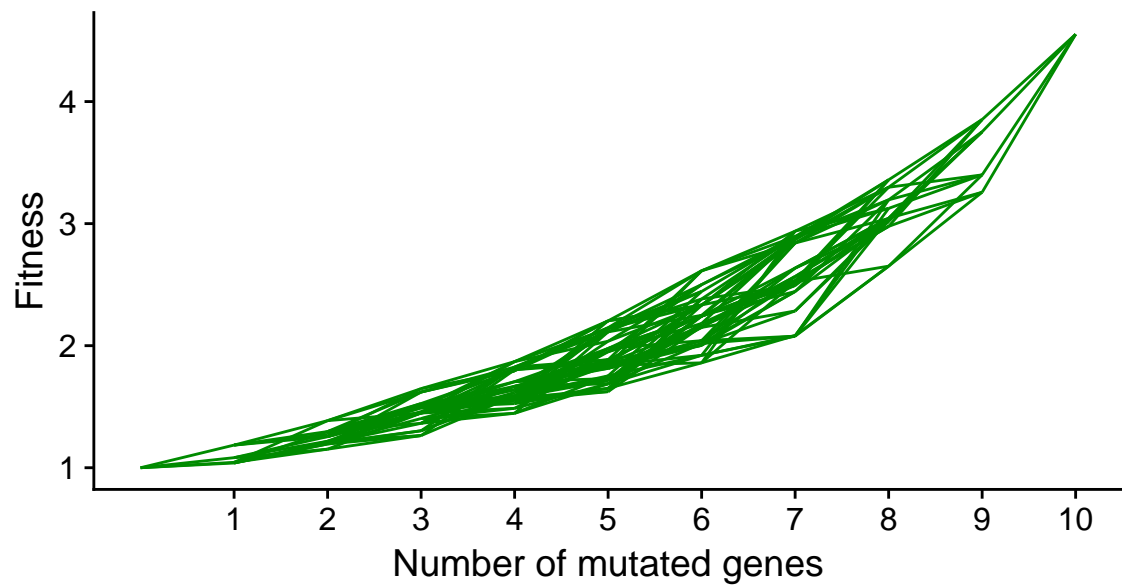

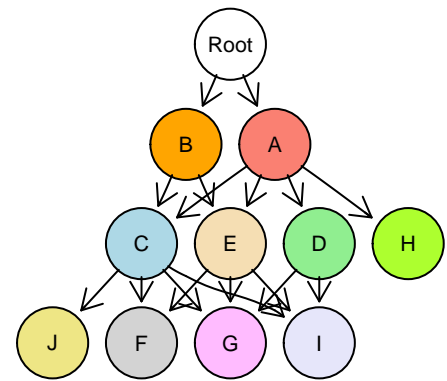

*ID* u8LSkOke6emtVQOi  
*acc genotypes* 62  
*peaks no back* 1  
*removed edges* 0  
*prop rem edges* 0

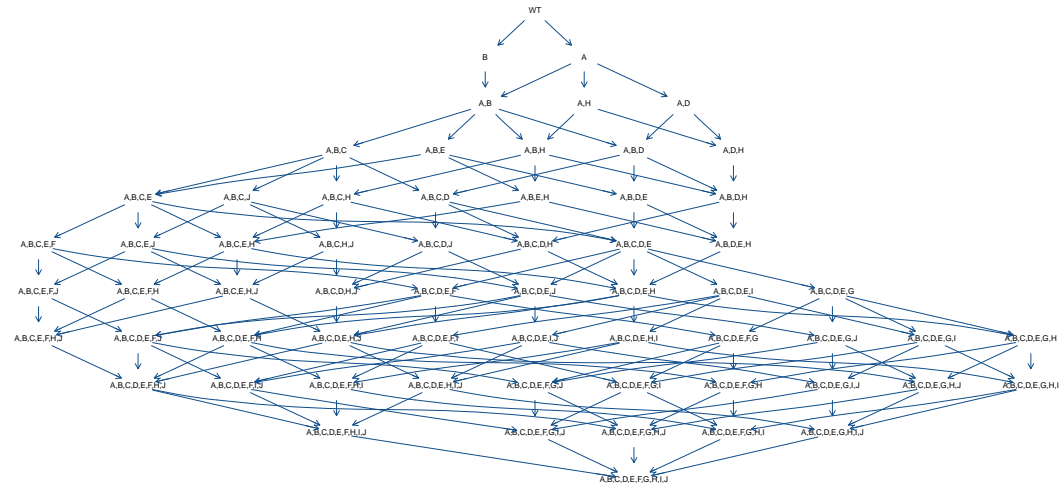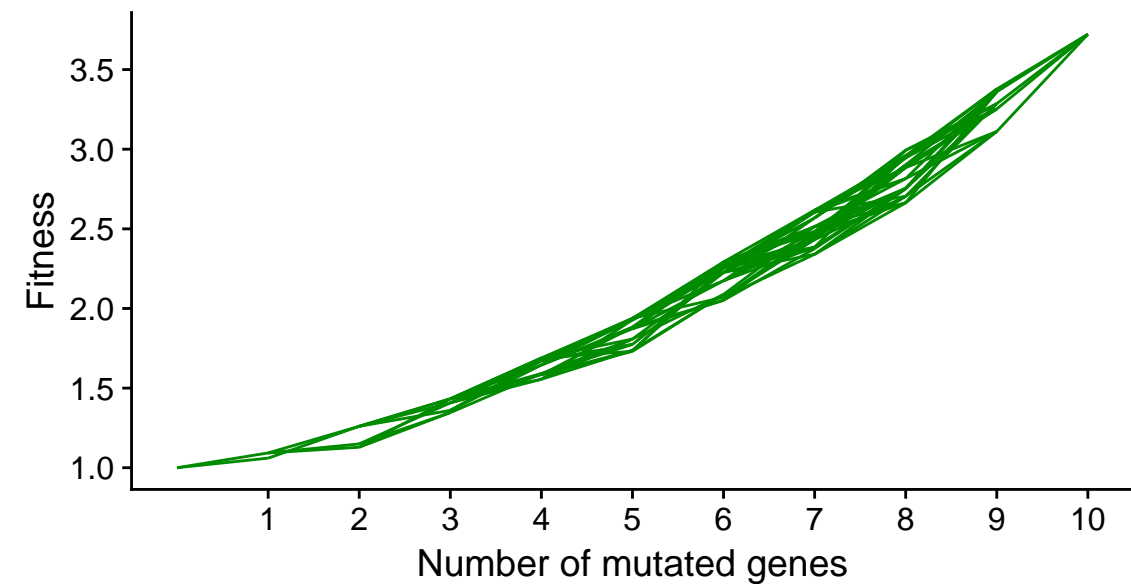

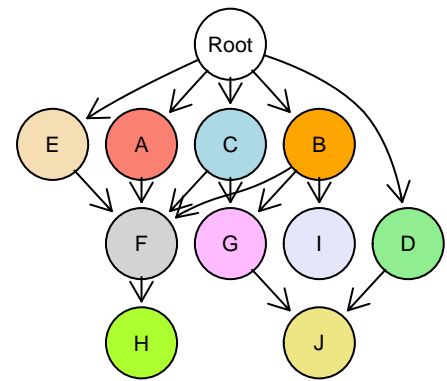

*ID* UjXjH4wCYwemR9Ik  
*acc genotypes* 92  
*peaks no back* 1  
*removed edges* 0  
*prop rem edges* 0

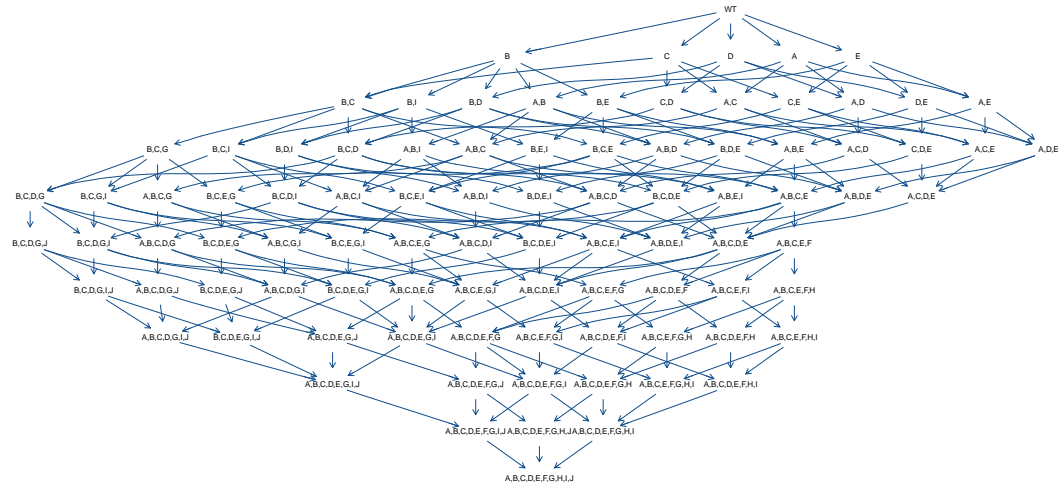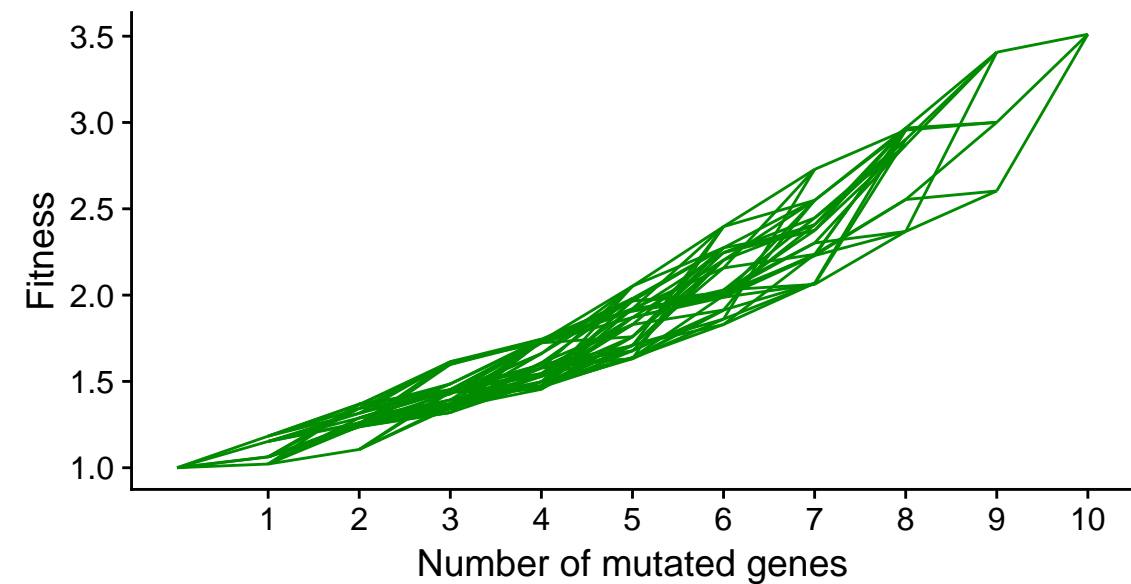

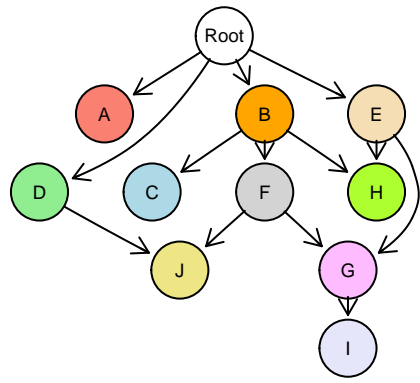

*ID* UPacqPOLUgev2Qbz  
*acc genotypes* 116  
*peaks no back* 1  
*removed edges* 0  
*prop rem edges* 0

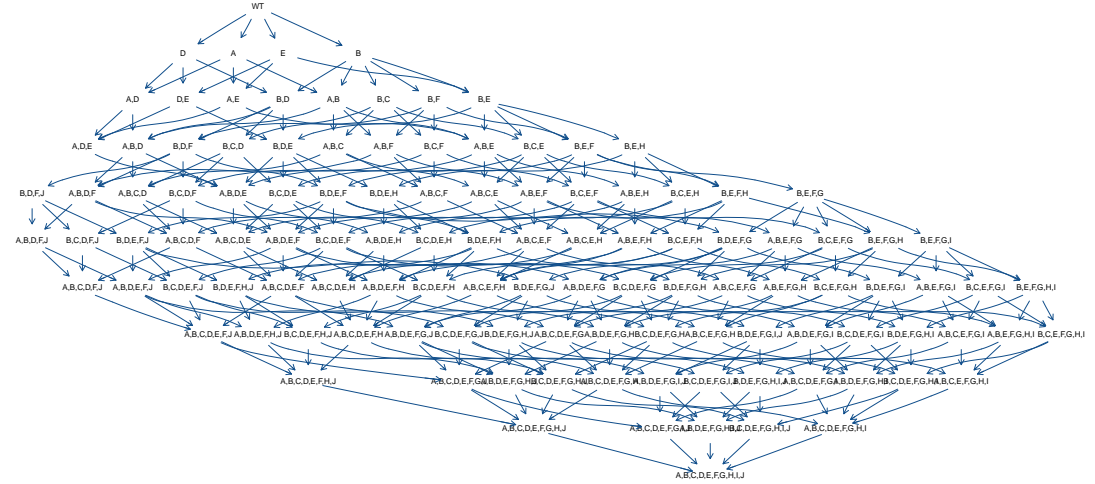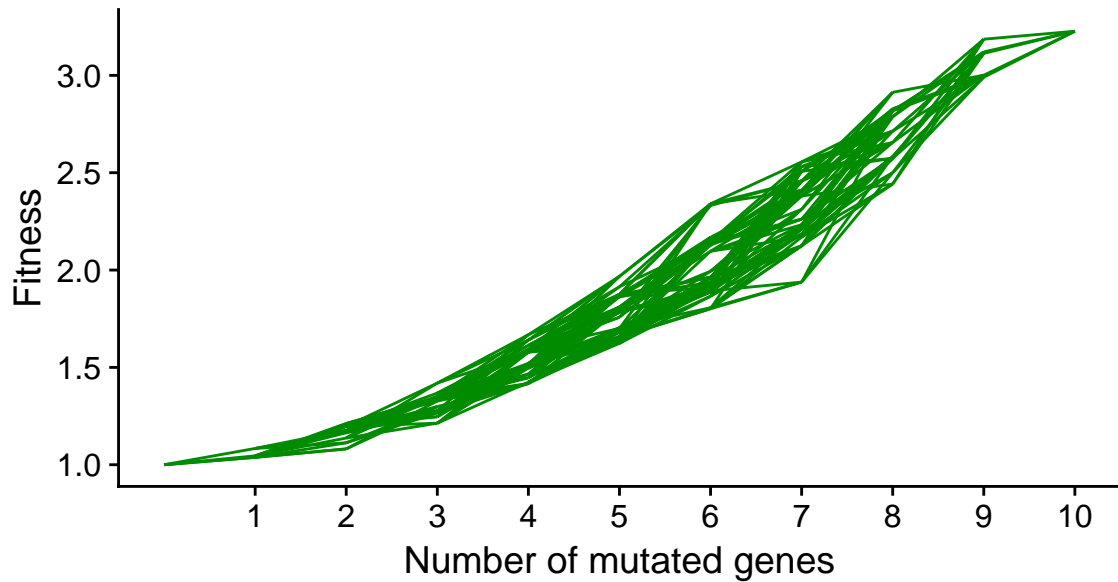

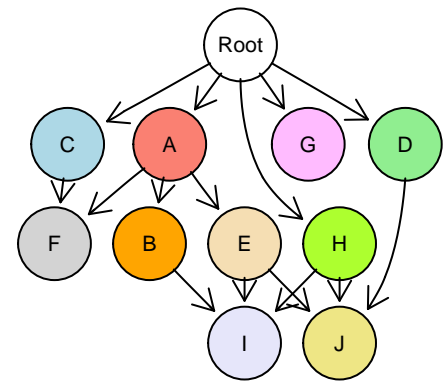

ID **UtTIZN4ssUPI1042T**  
 acc genotypes **142**  
 peaks no back 1  
 removed edges 0  
 prop rem edges 0

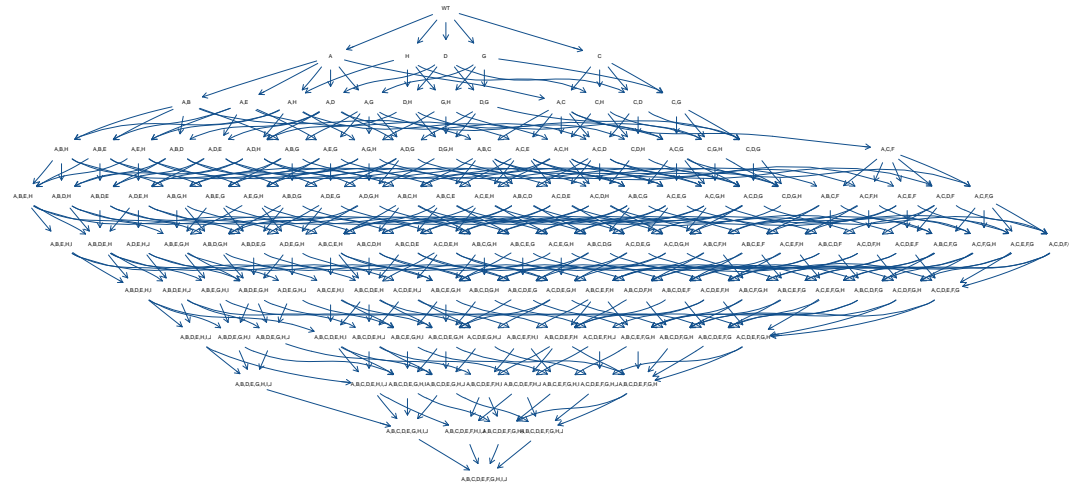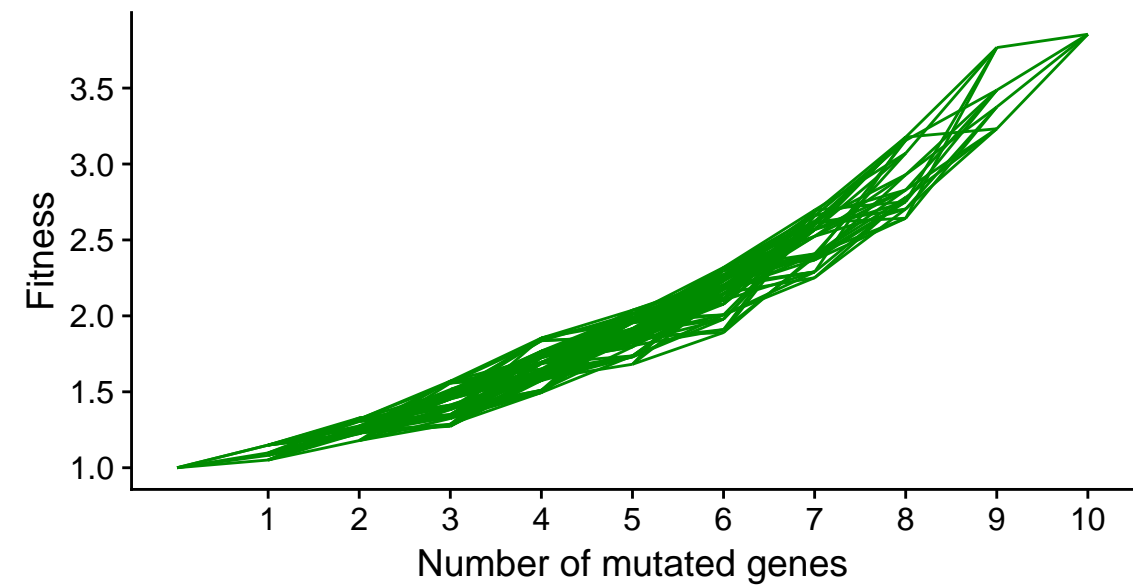

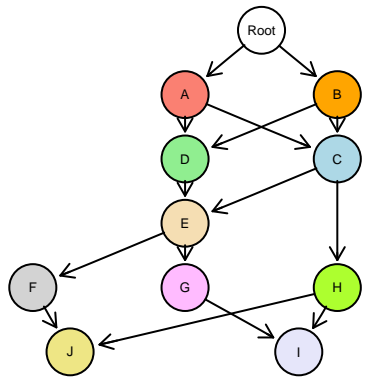

ID uU3eWnOFxxJy7Vct  
 acc genotypes 22  
 peaks no back 1  
 removed edges 0  
 prop rem edges 0

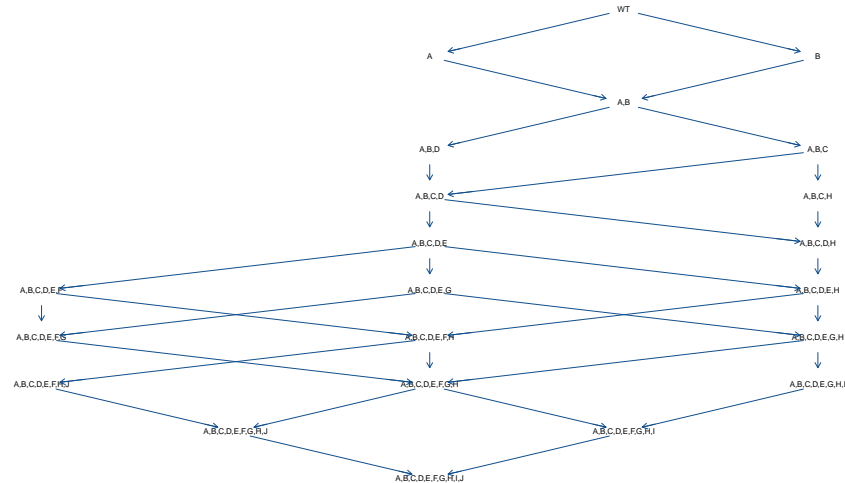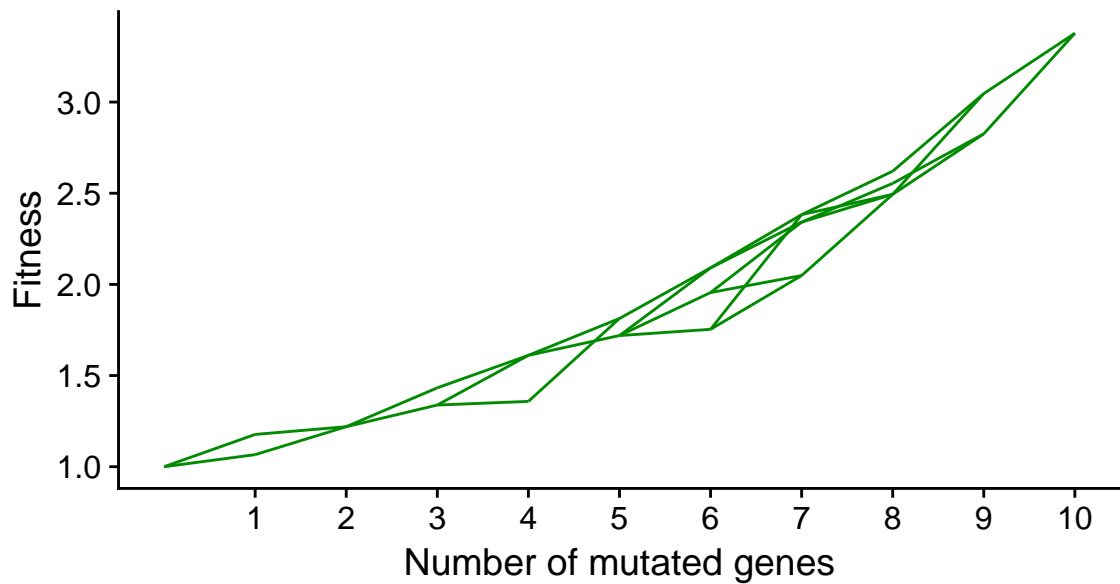

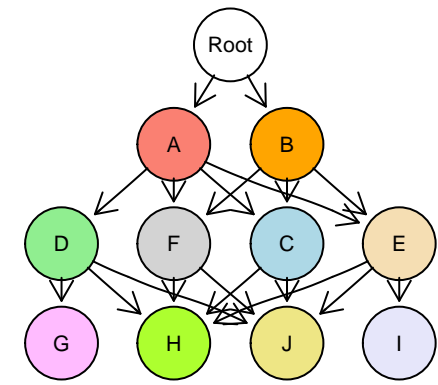

ID UvbbY5R10xG3o3Fbv  
 acc genotypes 53  
 peaks no back 1  
 removed edges 0  
 prop rem edges 0

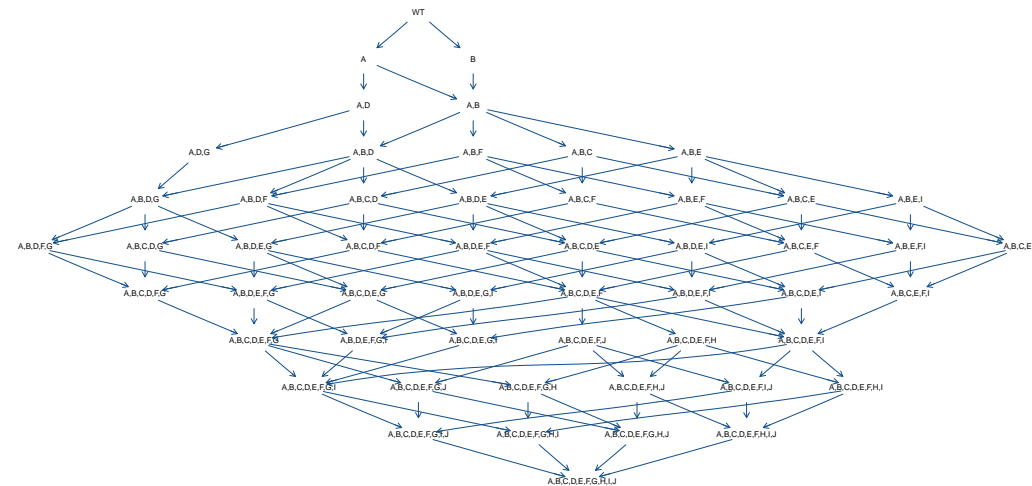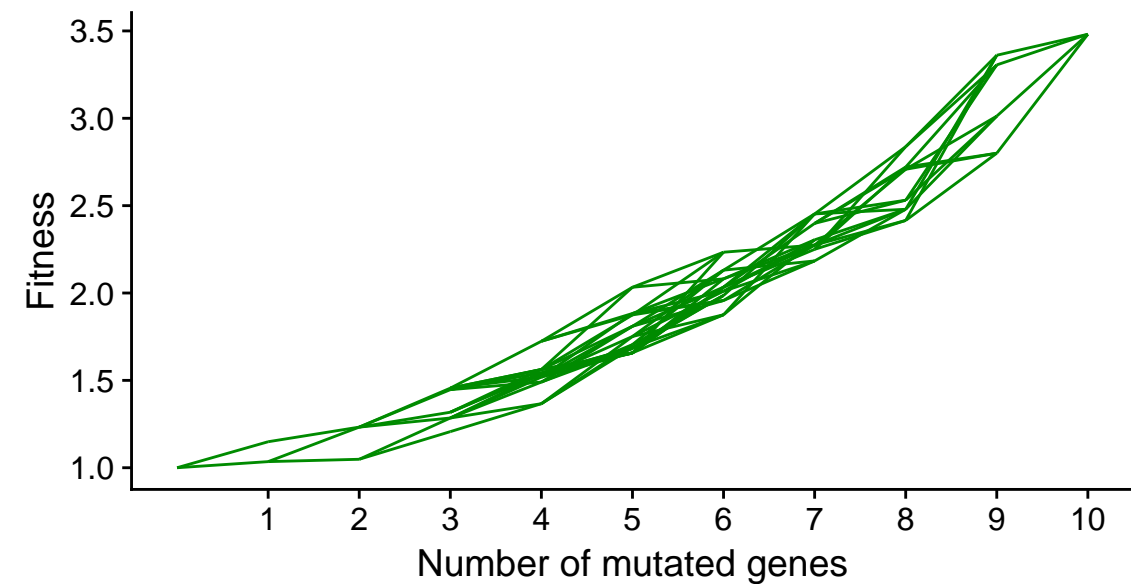



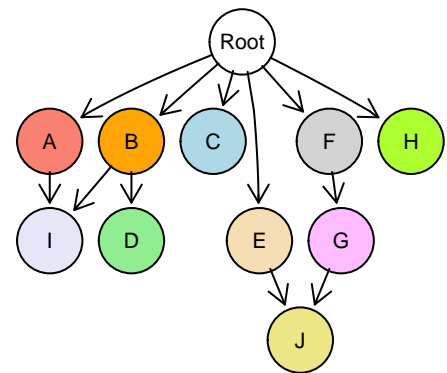

*ID* uVPTmh9a12FoeCLG  
*acc genotypes* 224  
*peaks no back* 1  
*removed edges* 0  
*prop rem edges* 0

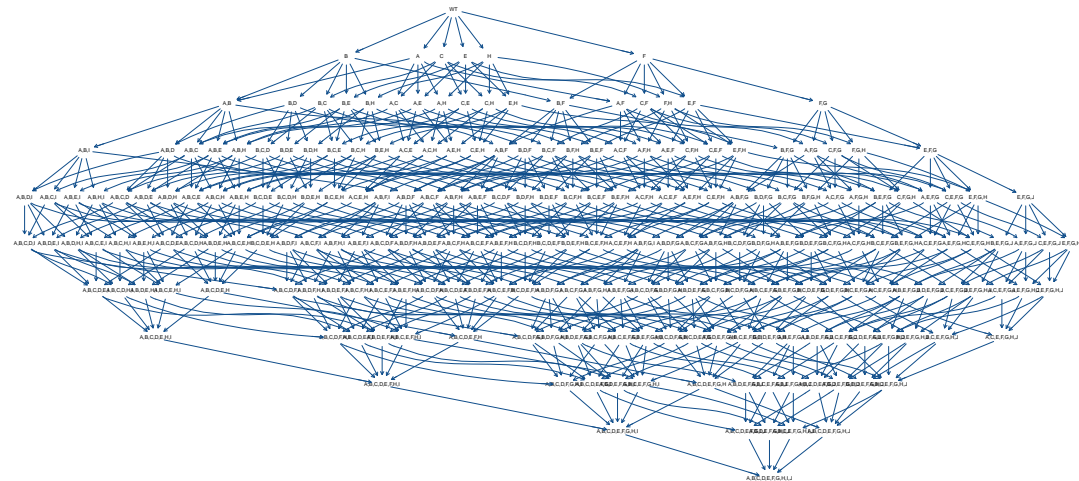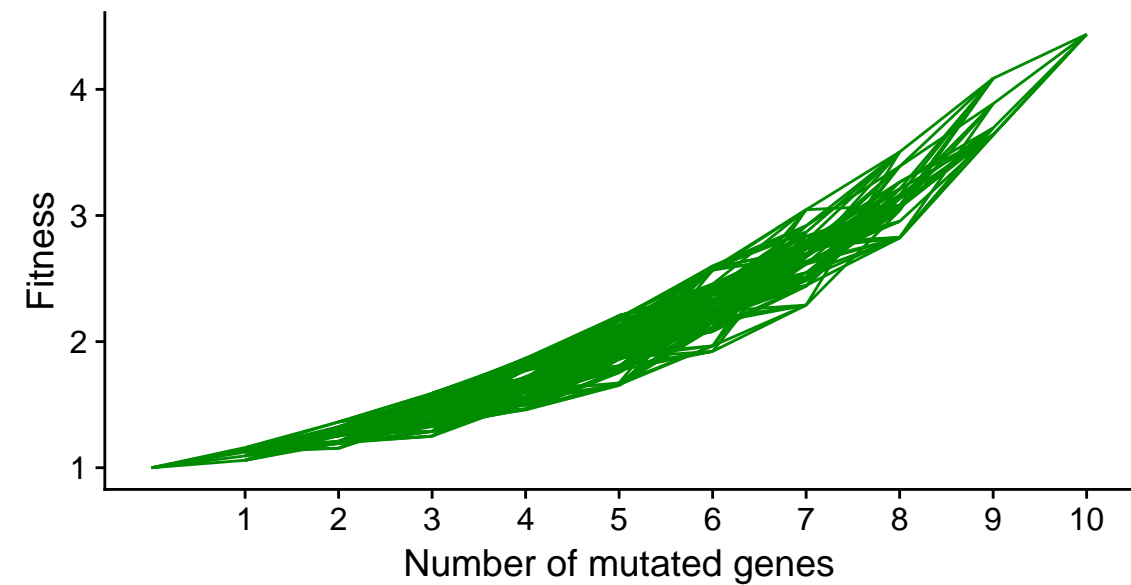

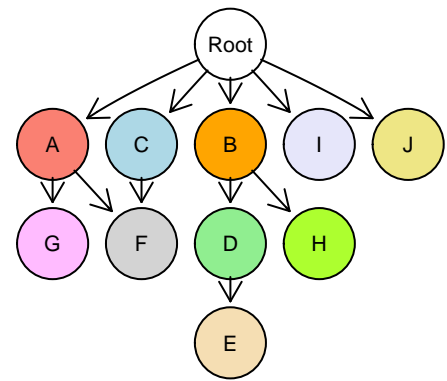

*ID* uWAn38F57JFUrkMr  
*acc genotypes* 224  
*peaks no back* 1  
*removed edges* 0  
*prop rem edges* 0

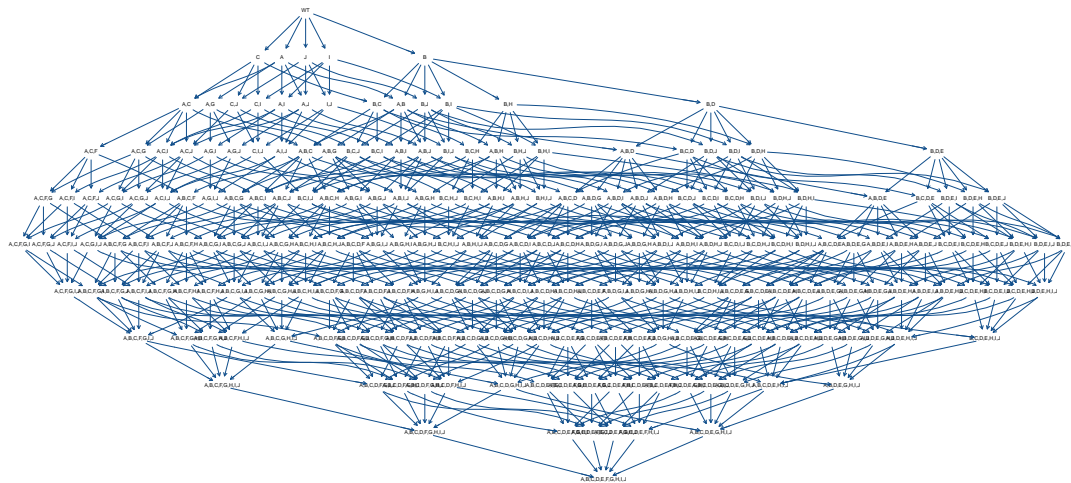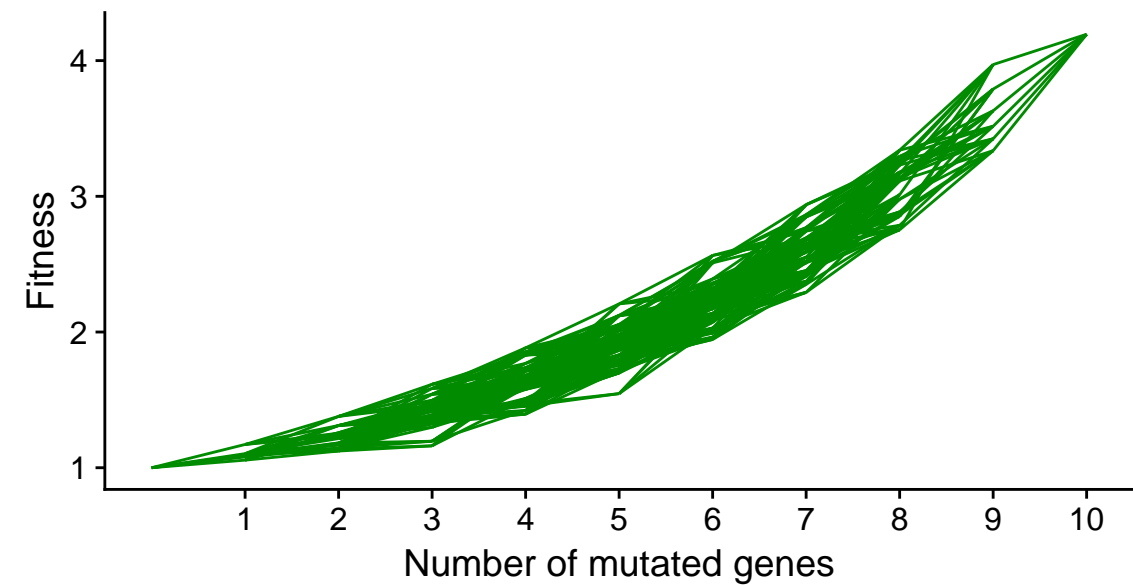

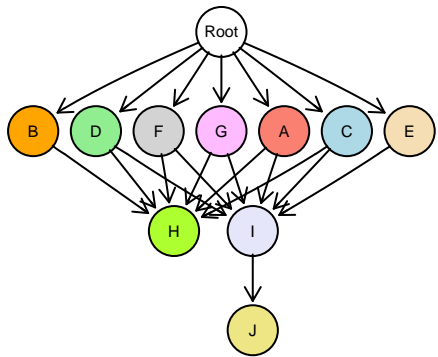

*ID* UXtvtbe61fs7Xr8g  
*acc genotypes* 136  
*peaks no back* 1  
*removed edges* 0  
*prop rem edges* 0

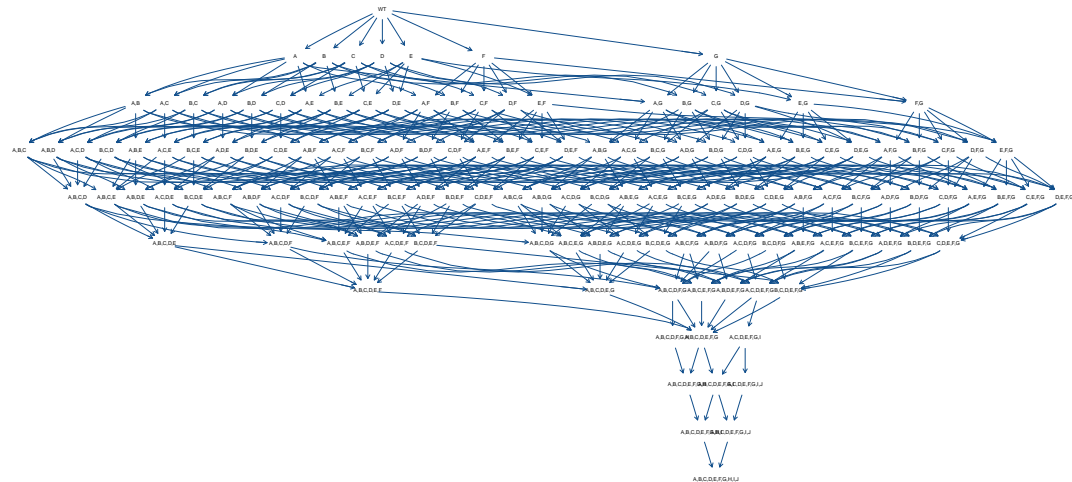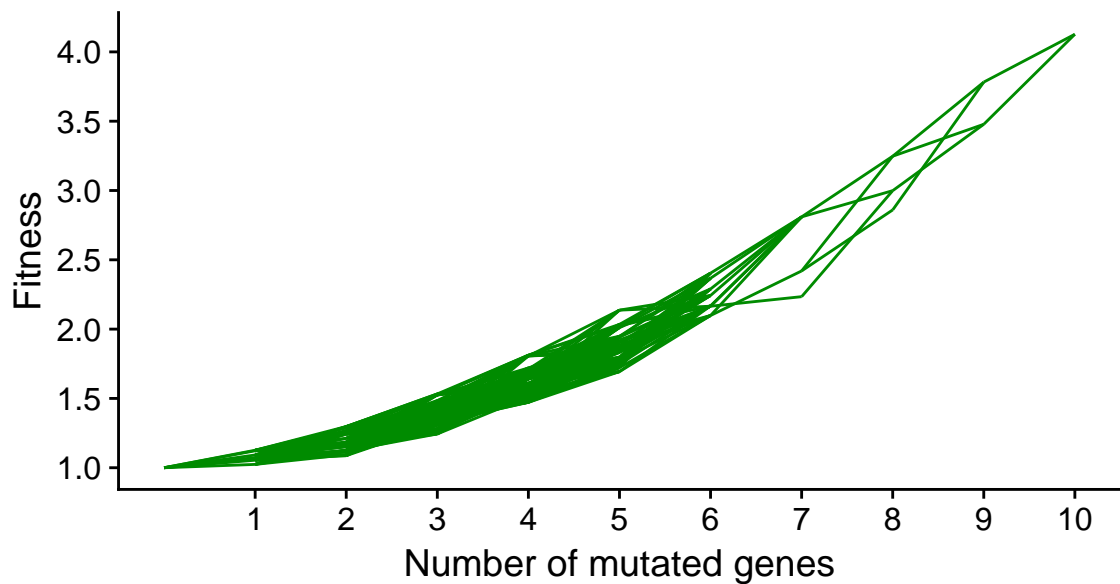

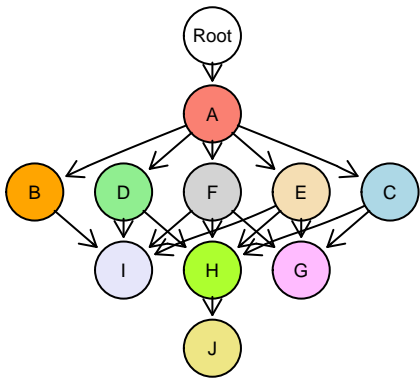

*ID* v7v1qJcKO4kxs78T  
*acc genotypes* 52  
*peaks no back* 1  
*removed edges* 0  
*prop rem edges* 0

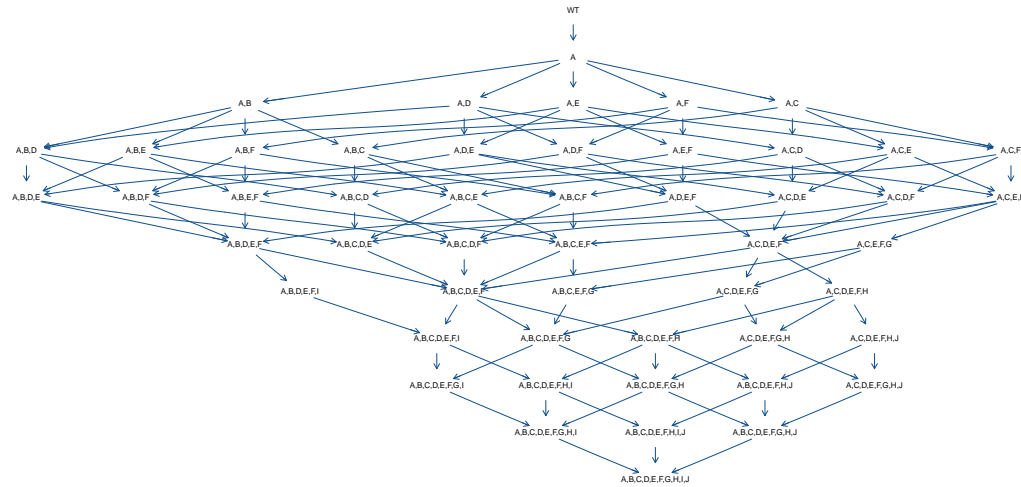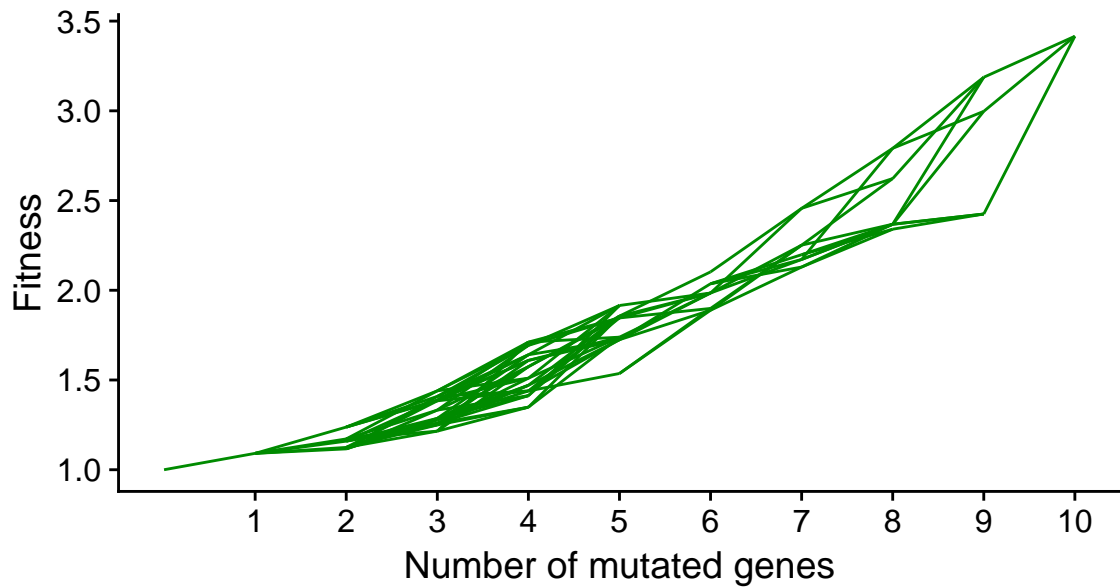

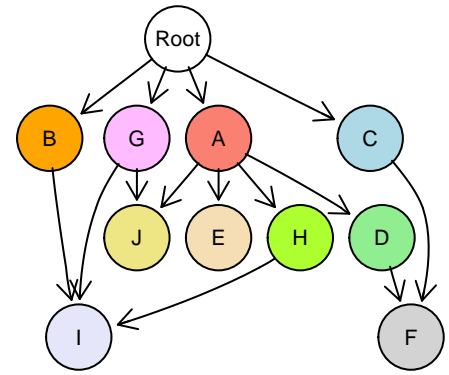

*ID* VdRwaw10j2G10mqCxP  
*acc genotypes* 148  
*peaks no back* 1  
*removed edges* 0  
*prop rem edges* 0

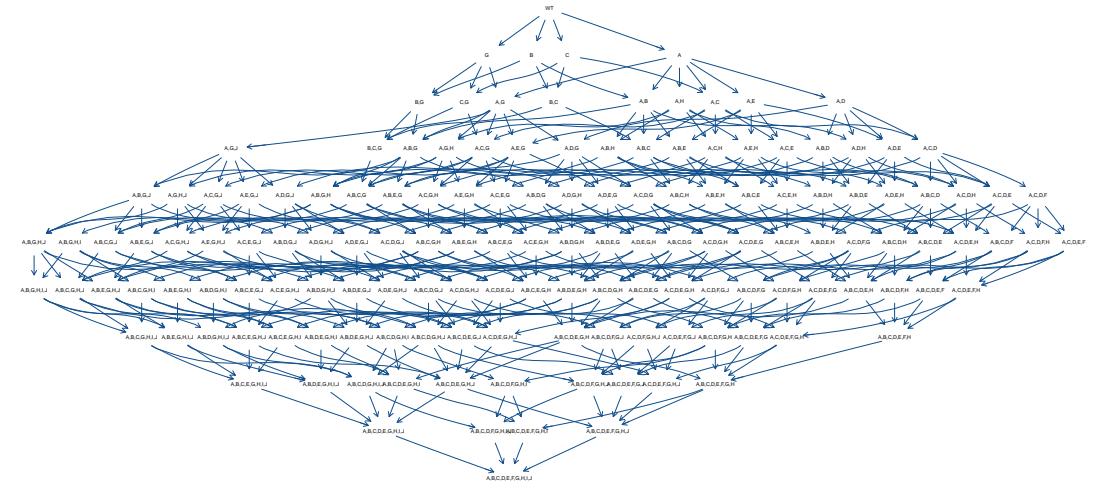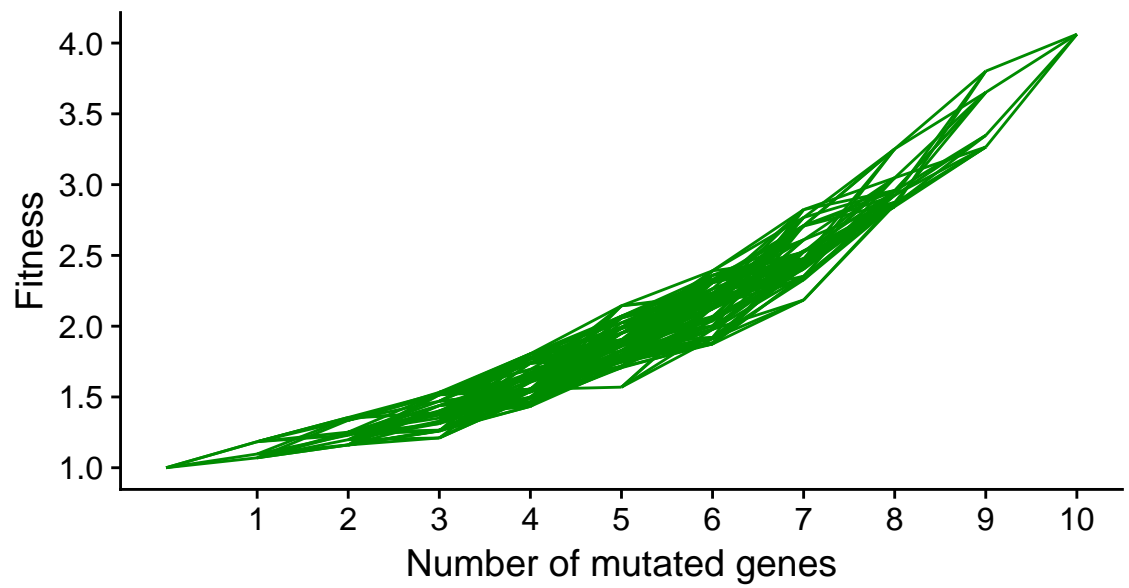

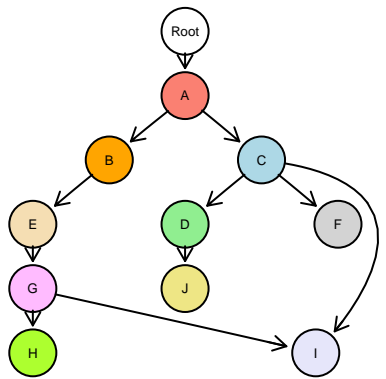

*ID* **VlIrIHndJDehvx8p**  
*acc genotypes* **48**  
*peaks no back* **1**  
*removed edges* **0**  
*prop rem edges* **0**

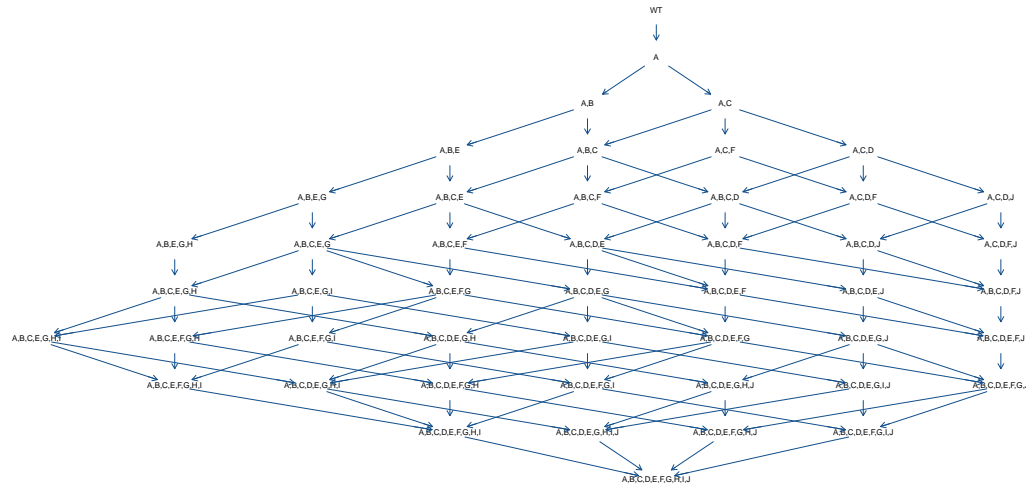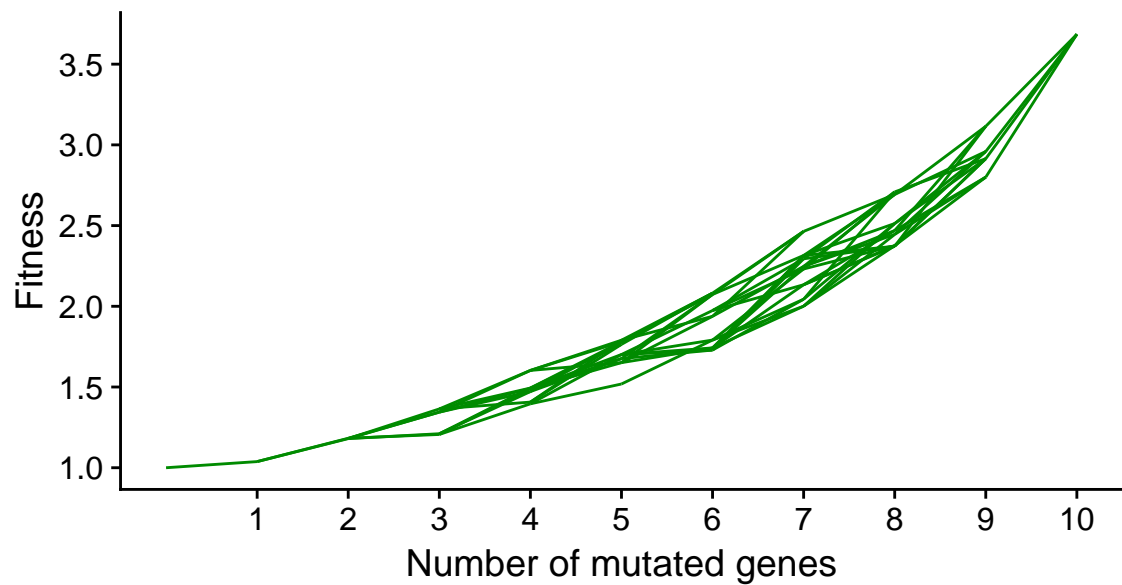

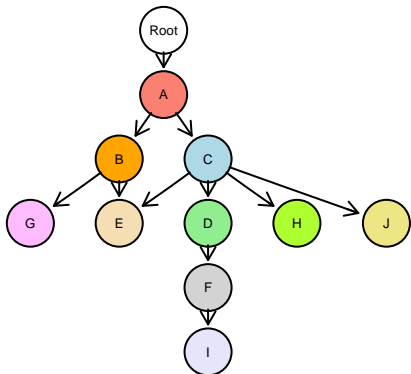

ID vKqR1PxaeGDS6o2G  
 acc genotypes 84  
 peaks no back 1  
 removed edges 0  
 prop rem edges 0

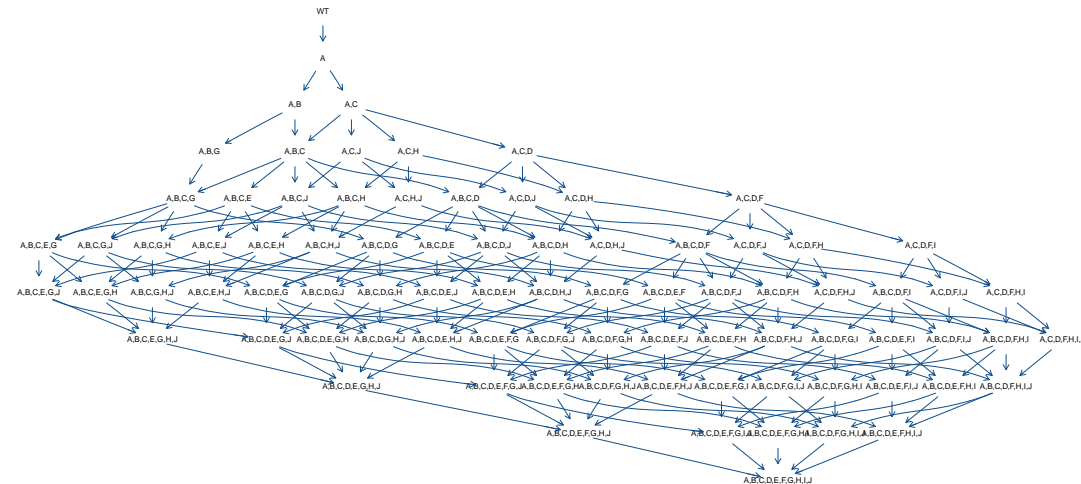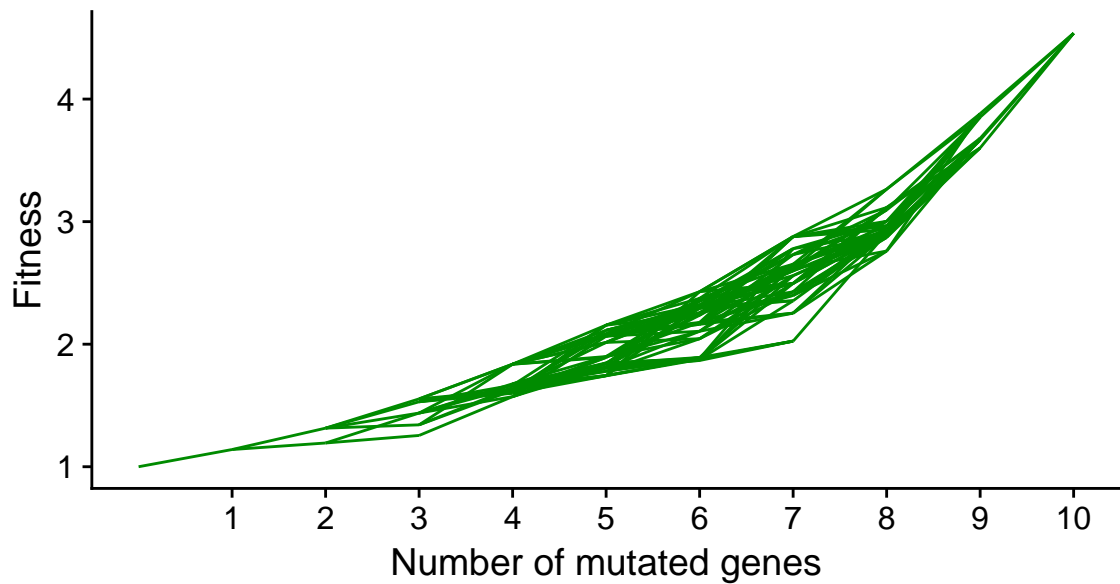

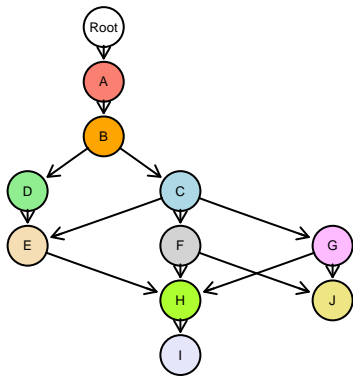

ID vWa8dLmVr7VaMvrU  
 acc genotypes 23  
 peaks no back 1  
 removed edges 0  
 prop rem edges 0

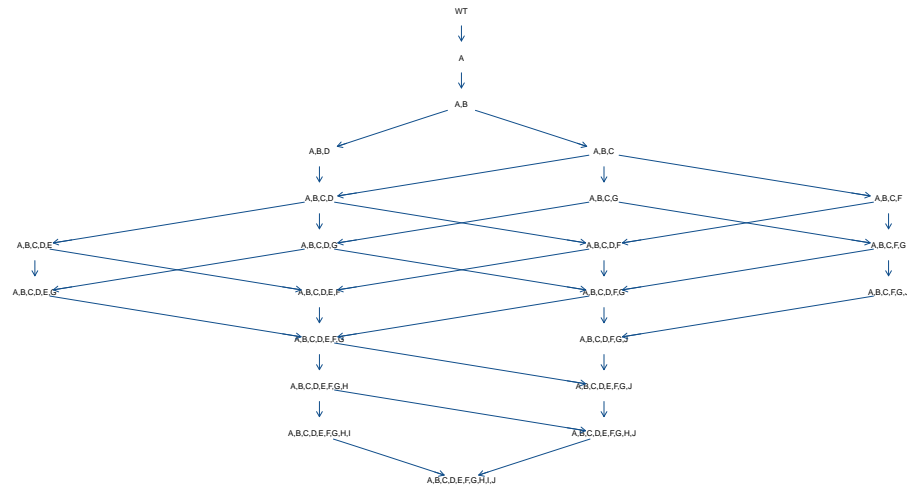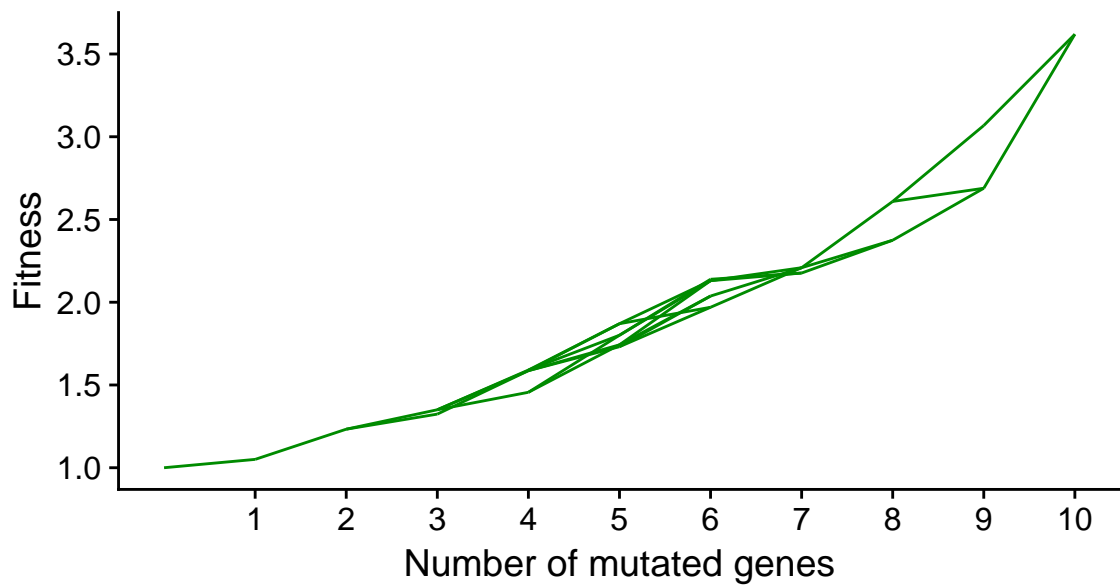



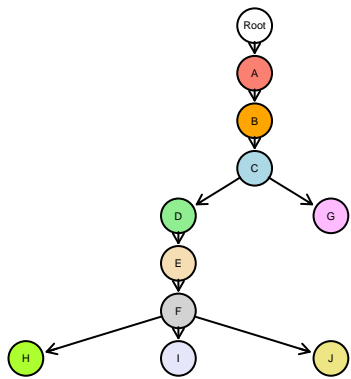

*ID* W10RExqb1hvnBZhkz  
*acc genotypes* 25  
*peaks no back* 1  
*removed edges* 0  
*prop rem edges* 0

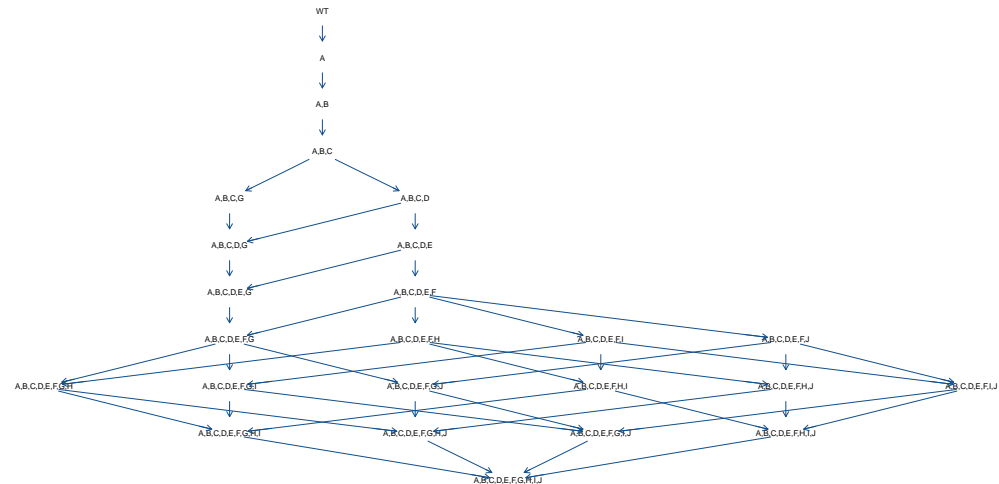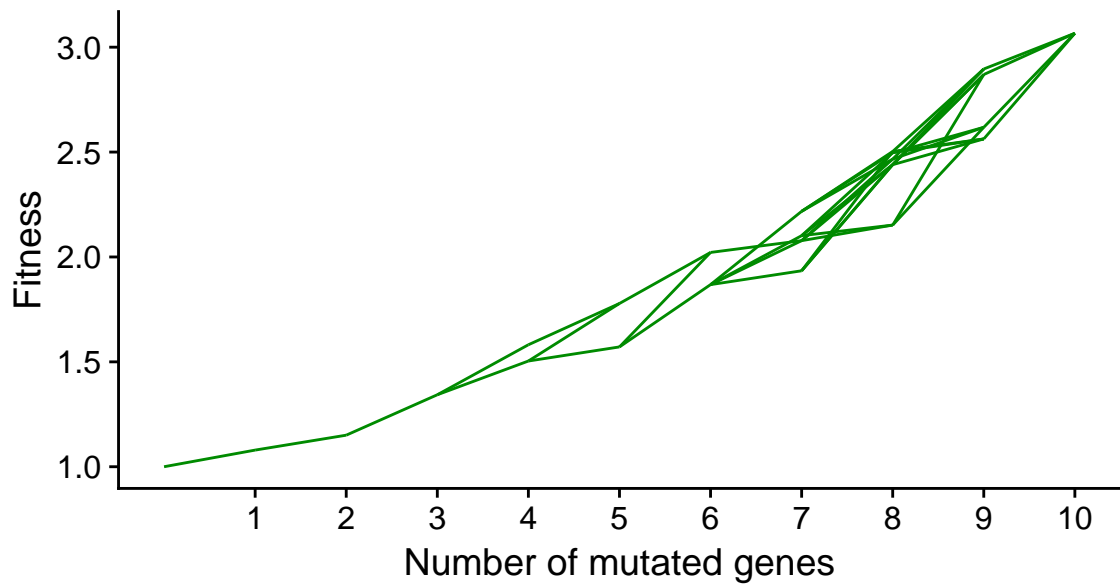

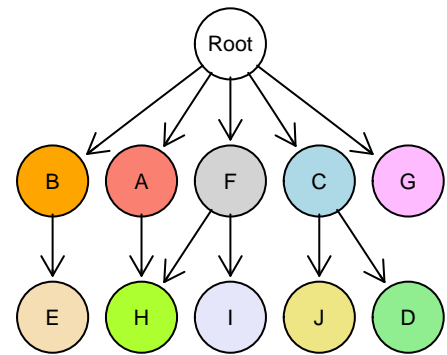

|                       |                  |
|-----------------------|------------------|
| <i>ID</i>             | w2LGyrZeMILULsIK |
| <i>acc genotypes</i>  | 240              |
| <i>peaks no back</i>  | 1                |
| <i>removed edges</i>  | 0                |
| <i>prop rem edges</i> | 0                |

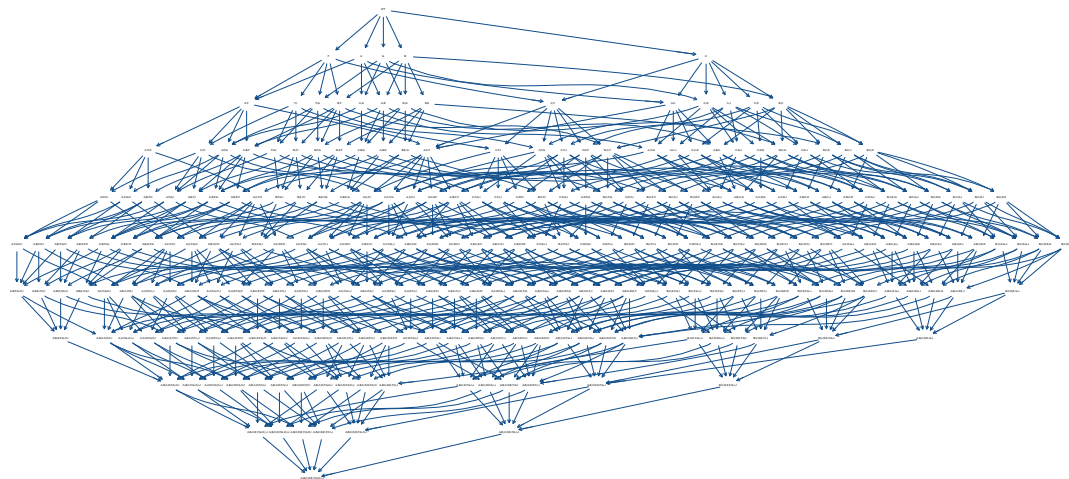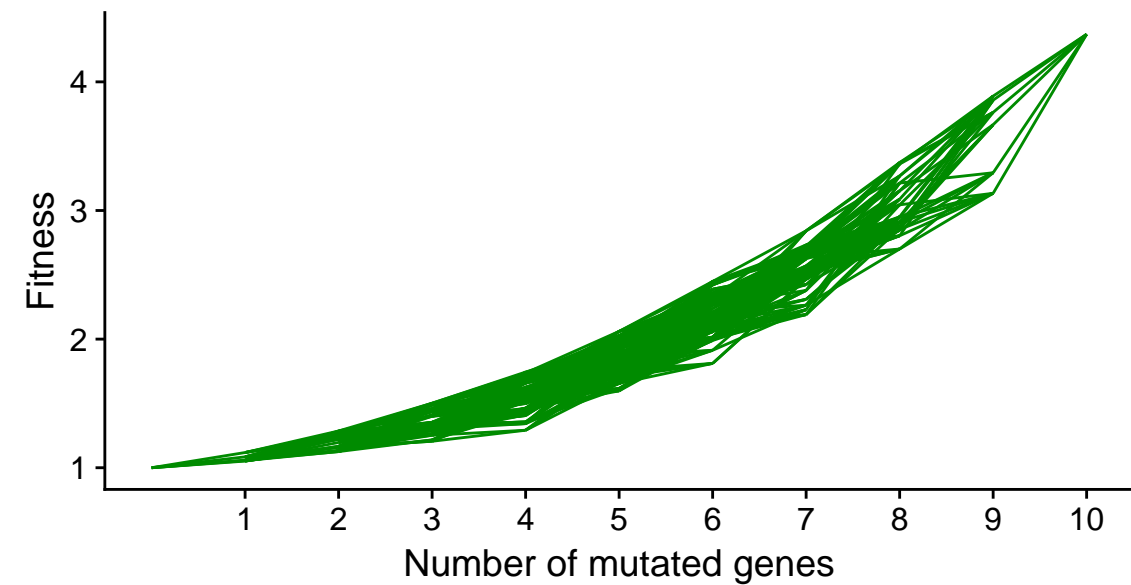

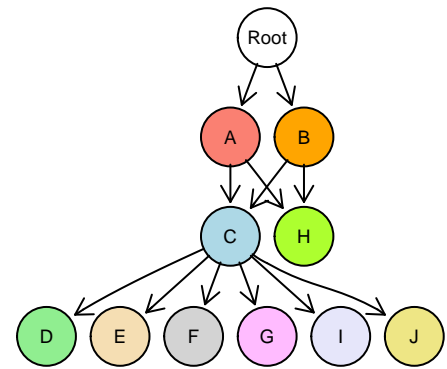

*ID* wOVnm2kwBXXY2Fm4  
*acc genotypes* 133  
*peaks no back* 1  
*removed edges* 0  
*prop rem edges* 0

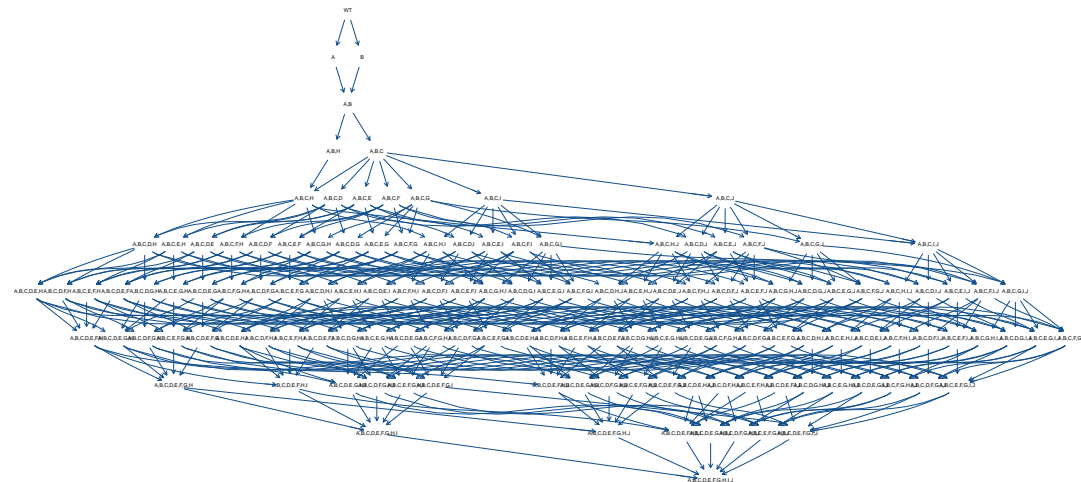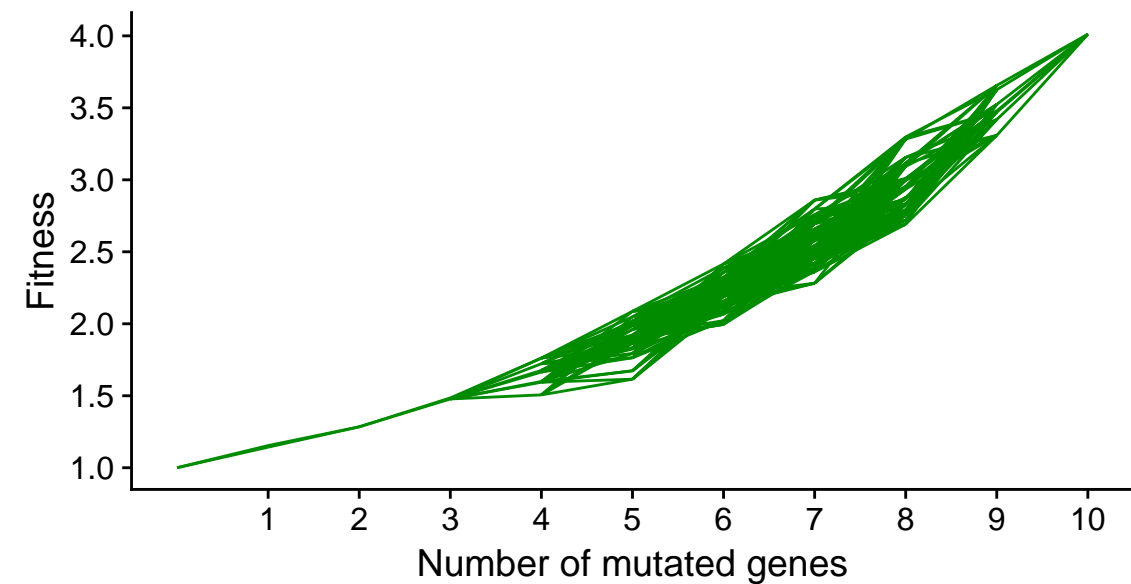

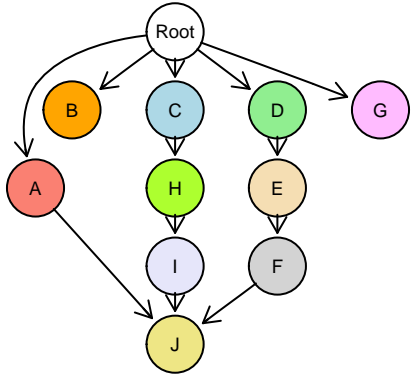

ID **WX2rq5CKiTz10Vbzs**  
 acc genotypes **132**  
 peaks no back 1  
 removed edges 0  
 prop rem edges 0

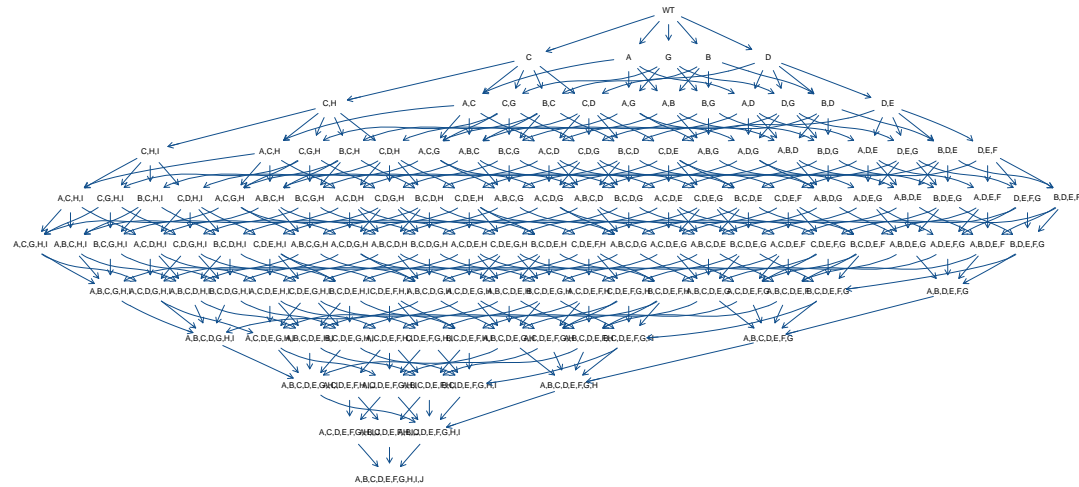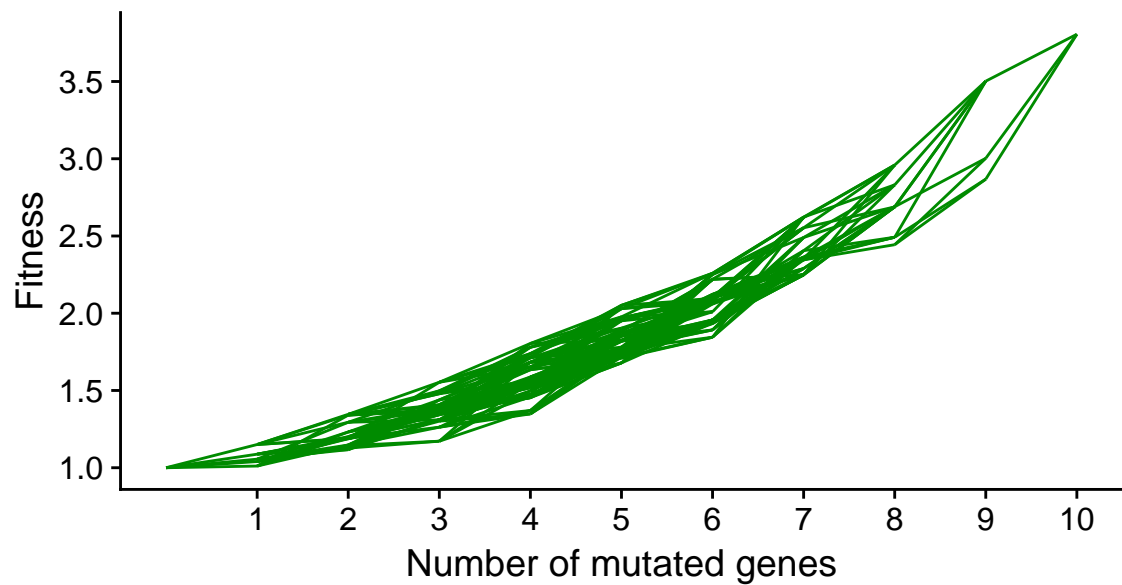

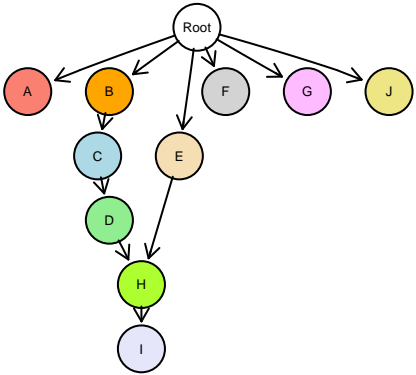

ID X73CthbrahOJ65dM  
 acc genotypes 160  
 peaks no back 1  
 removed edges 0  
 prop rem edges 0

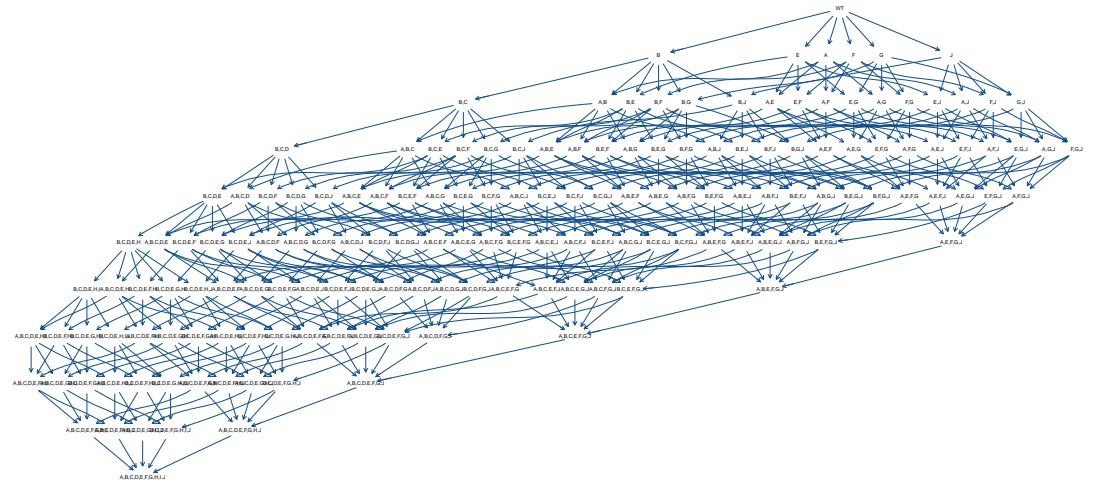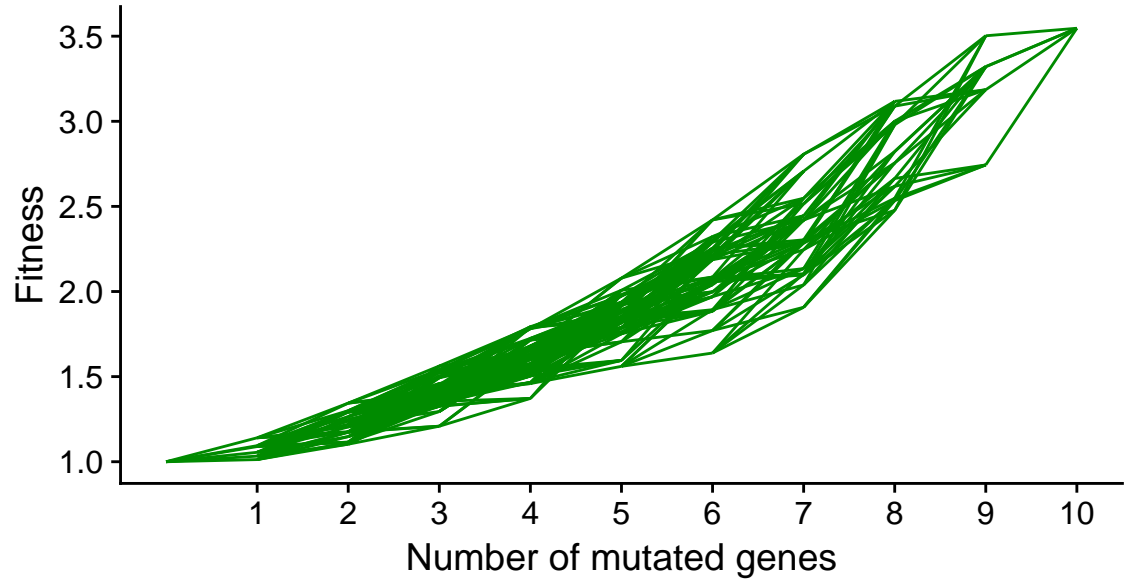

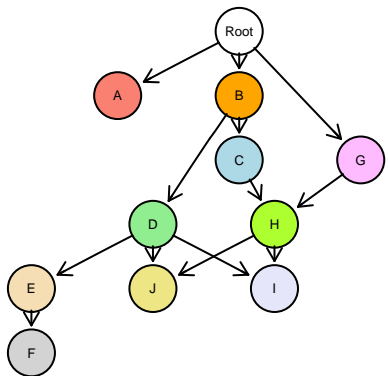

ID xghzdPbC2Ste8yA4  
 acc genotypes 62  
 peaks no back 1  
 removed edges 0  
 prop rem edges 0

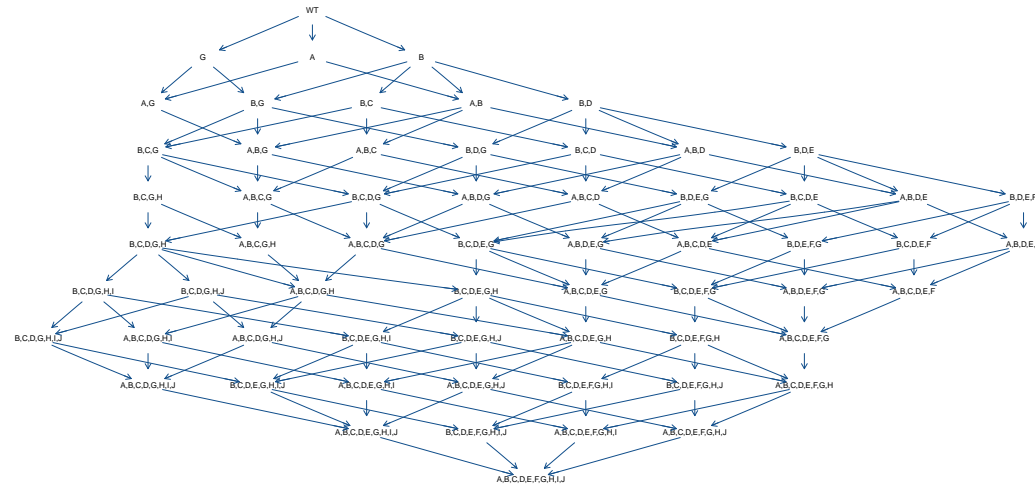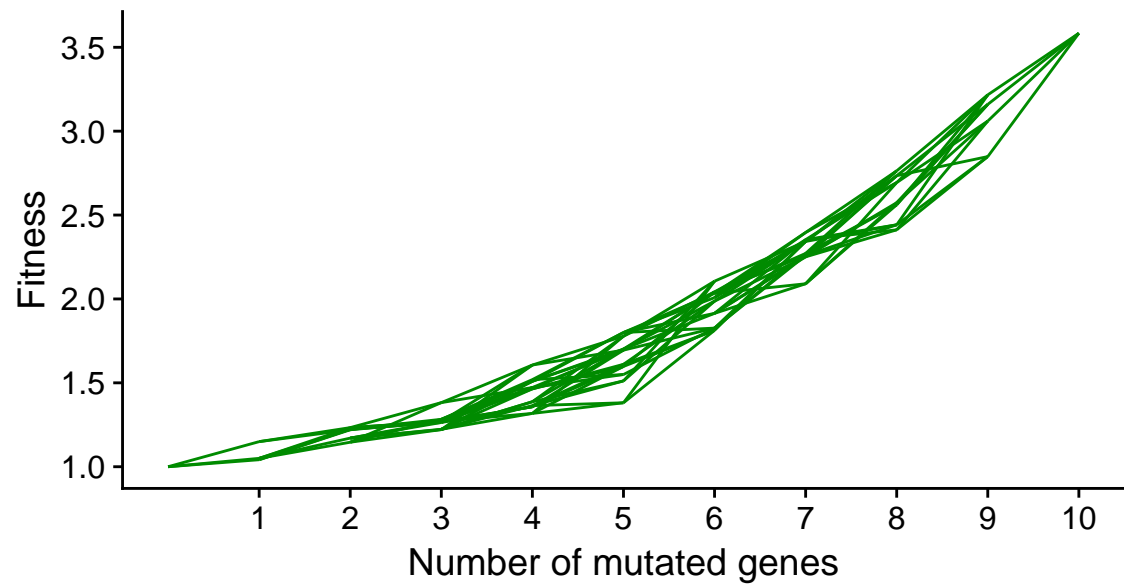

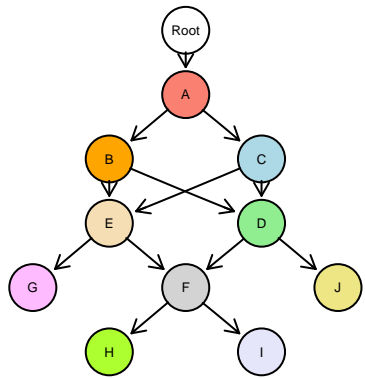

*ID*      **xsBe1fvNRQrAYKEK**  
*acc genotypes*      **29**  
*peaks no back*      **1**  
*removed edges*      **0**  
*prop rem edges*      **0**

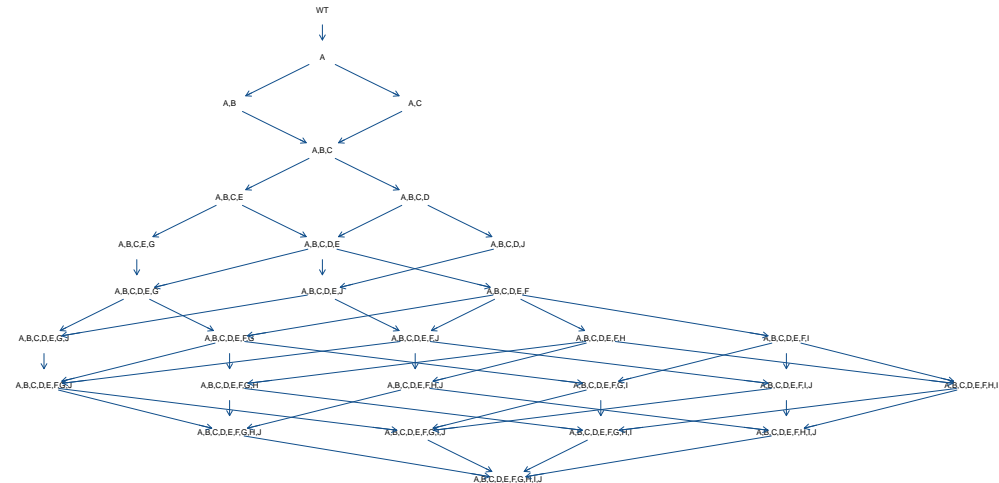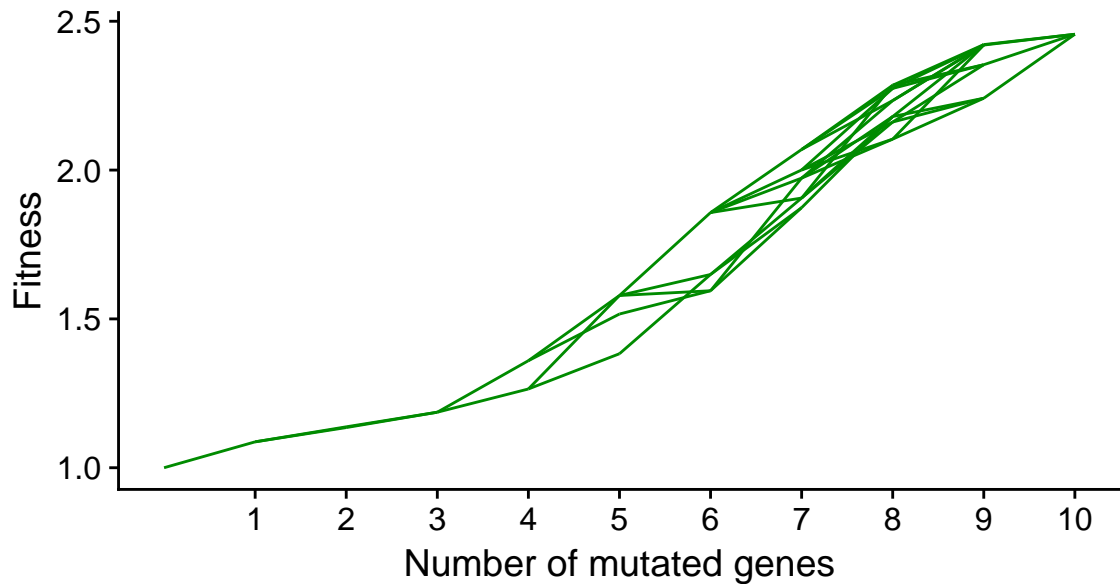

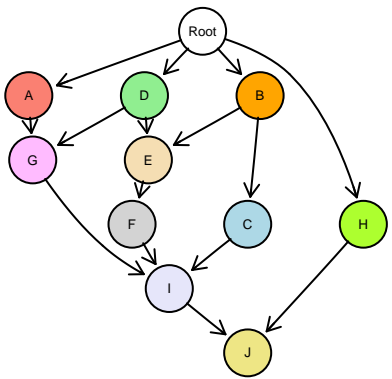

*ID* xTeo6GEUfqWOarjY  
*acc genotypes* 57  
*peaks no back* 1  
*removed edges* 0  
*prop rem edges* 0

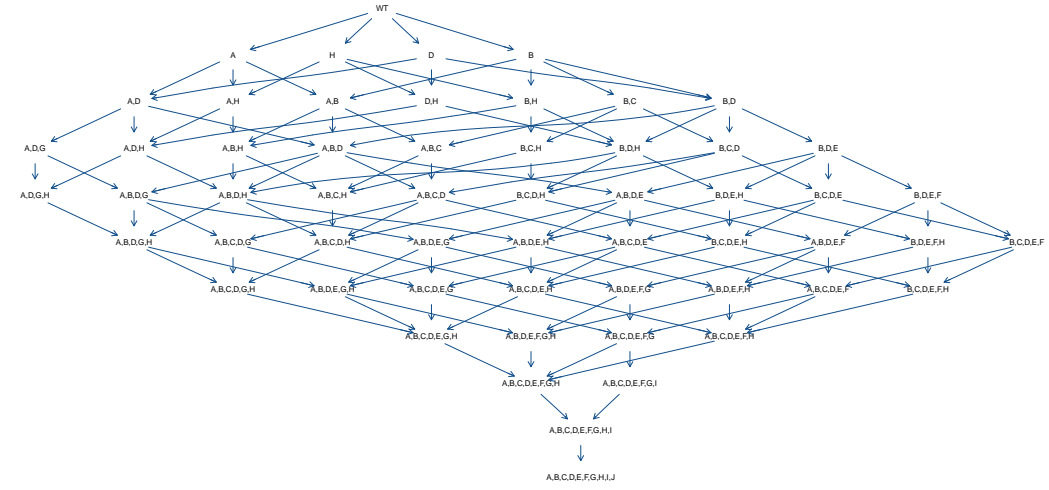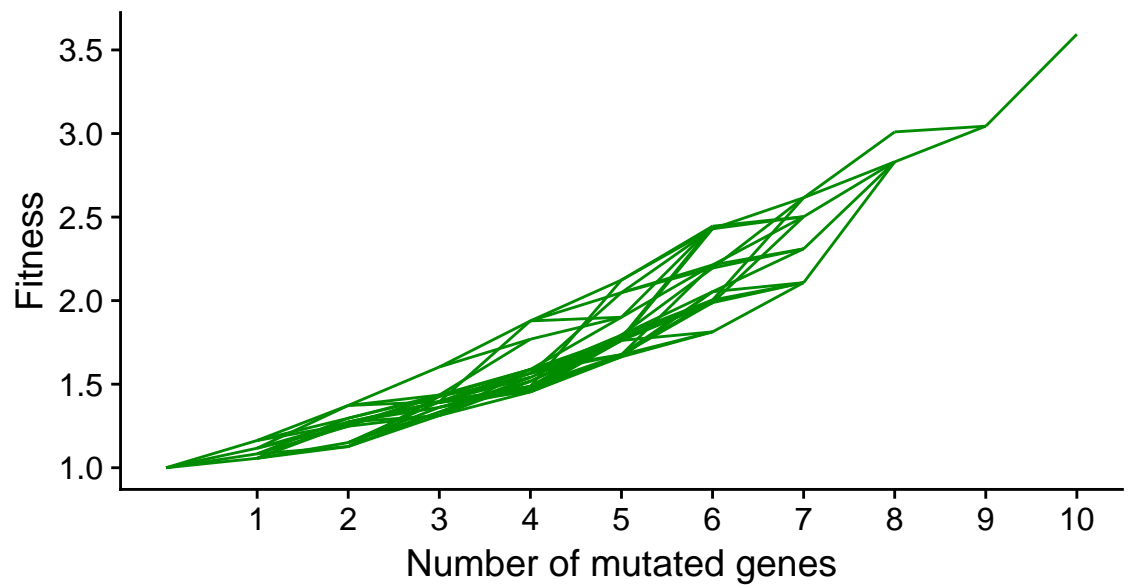



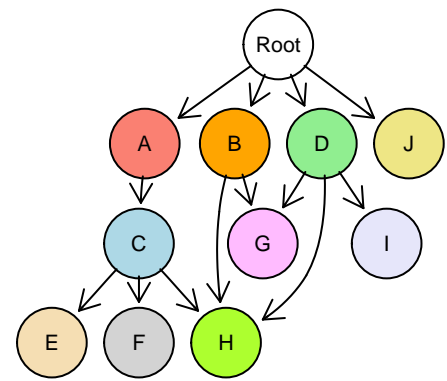

*ID* xUB10YVej3P32RKli  
*acc genotypes* 128  
*peaks no back* 1  
*removed edges* 0  
*prop rem edges* 0

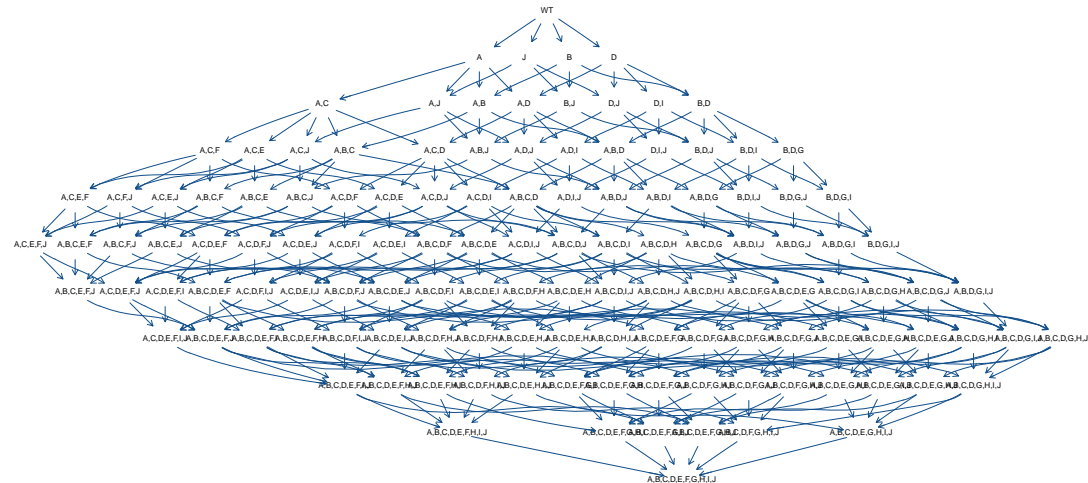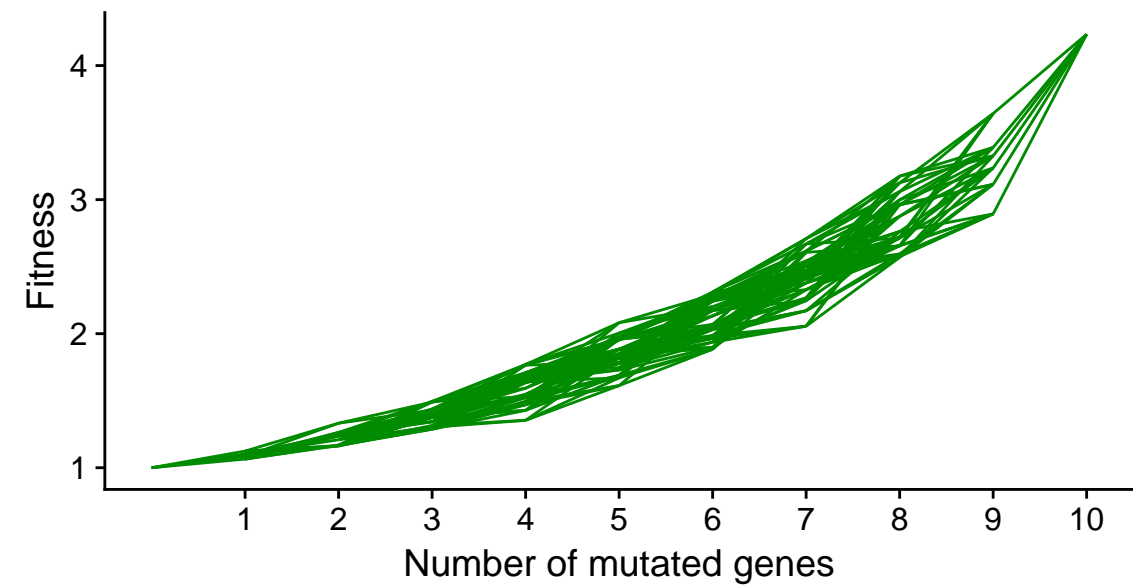

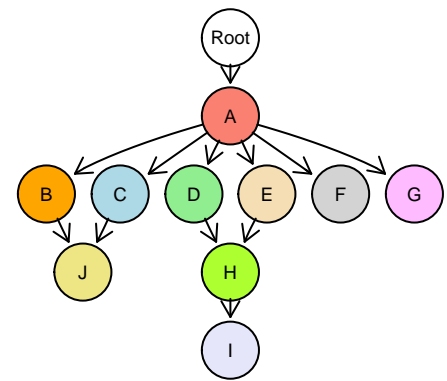

*ID* xVYnsd10xBjzI3Lt2  
*acc genotypes* 121  
*peaks no back* 1  
*removed edges* 0  
*prop rem edges* 0

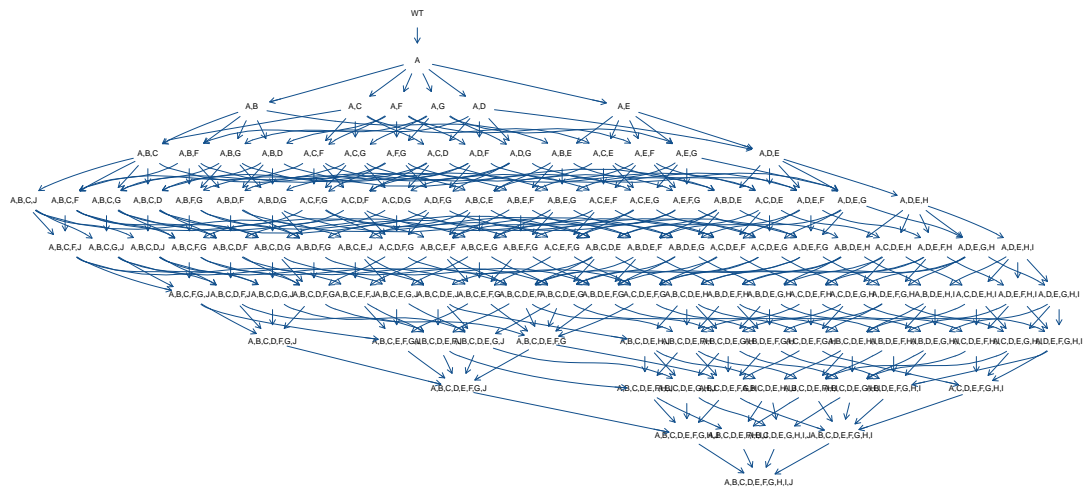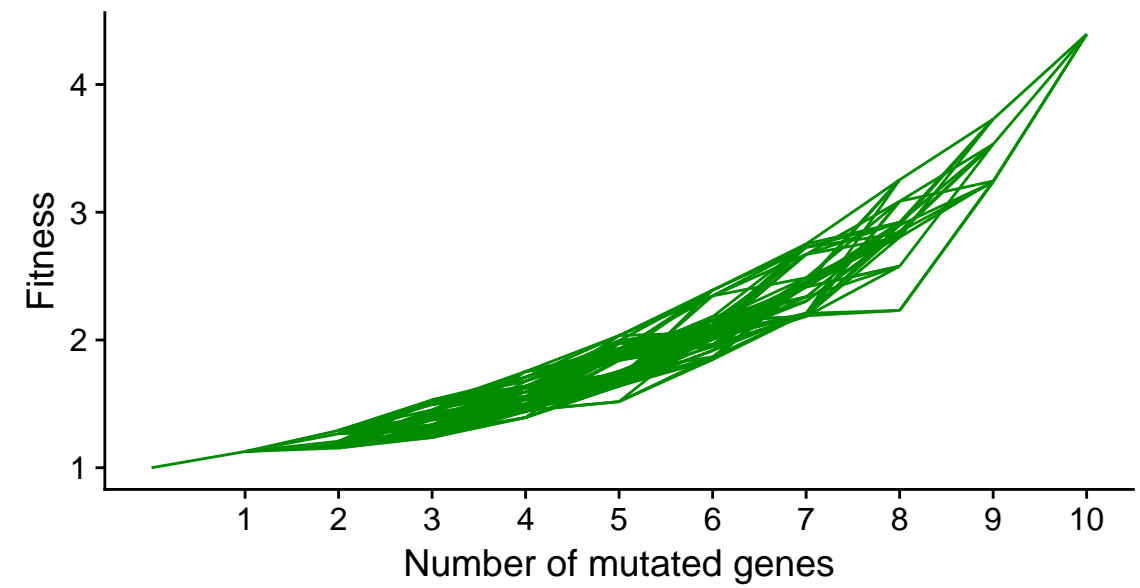

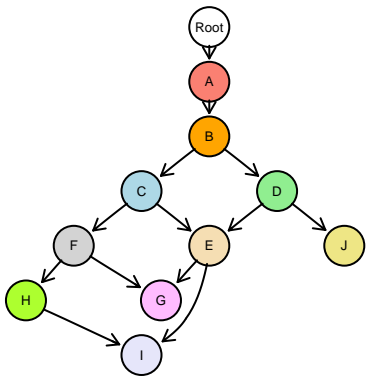

ID xWR3MCuUy8RkrLHF  
 acc genotypes 28  
 peaks no back 1  
 removed edges 0  
 prop rem edges 0

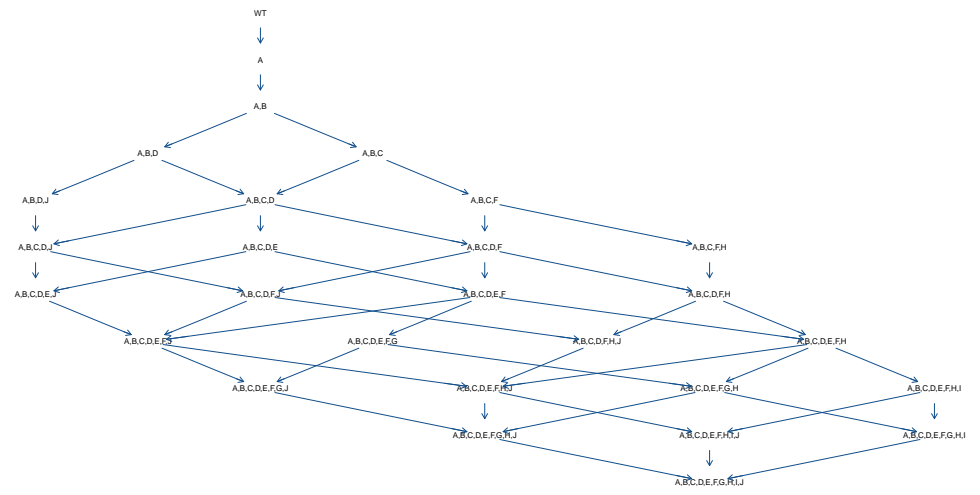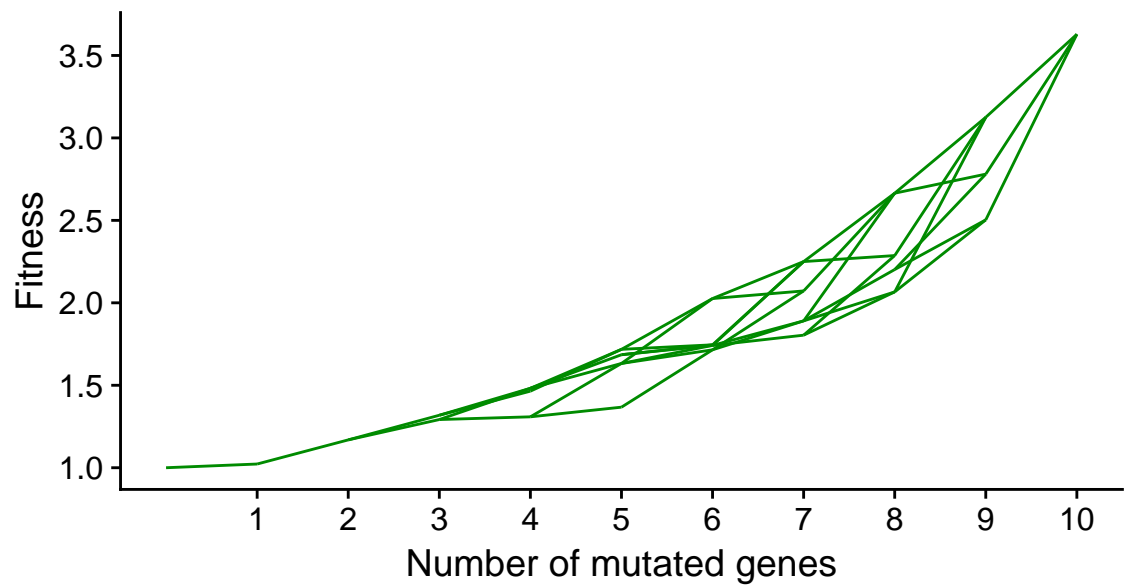

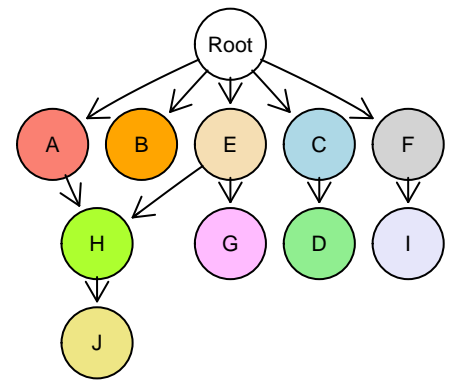

ID XYVDPIvrNBjwJzR  
 acc genotypes 180  
 peaks no back 1  
 removed edges 0  
 prop rem edges 0

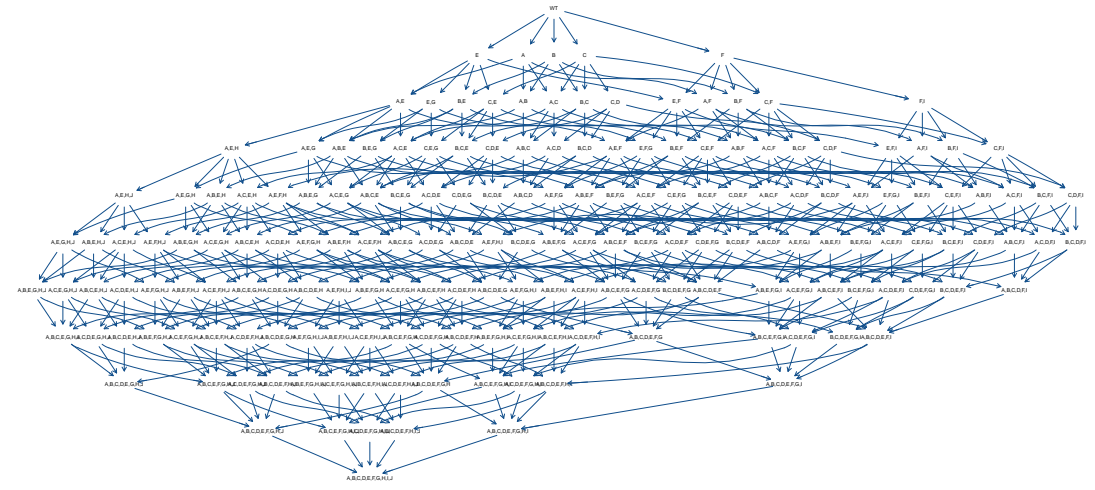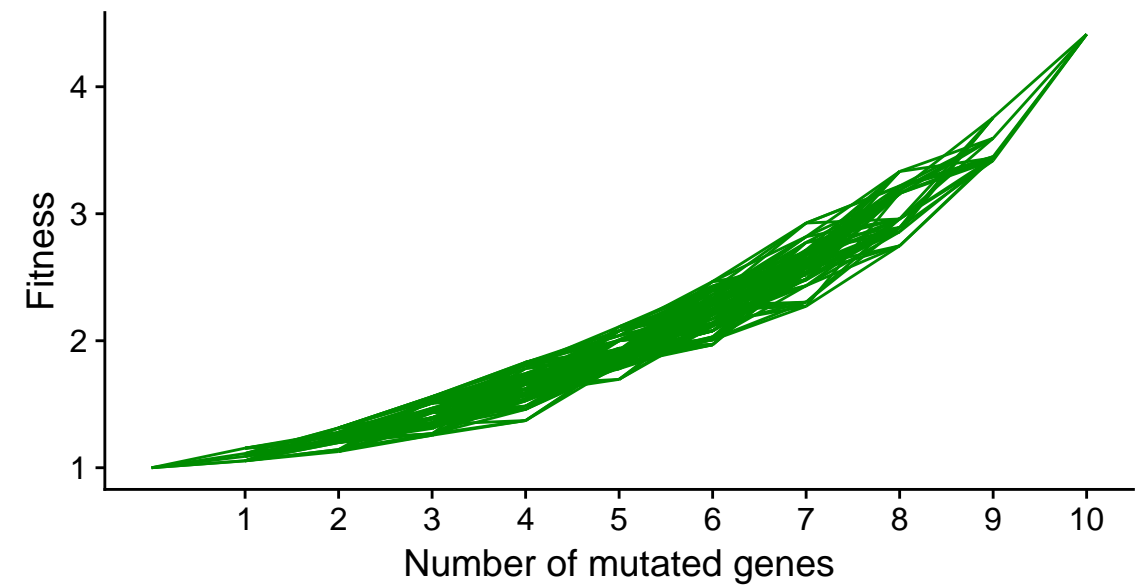

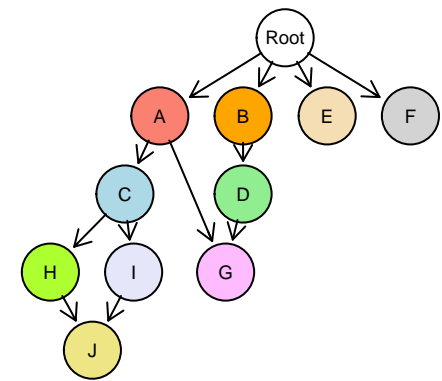

ID **y1DWAEMgCsc8ELI2**  
 acc genotypes **108**  
 peaks no back **1**  
 removed edges **0**  
 prop rem edges **0**

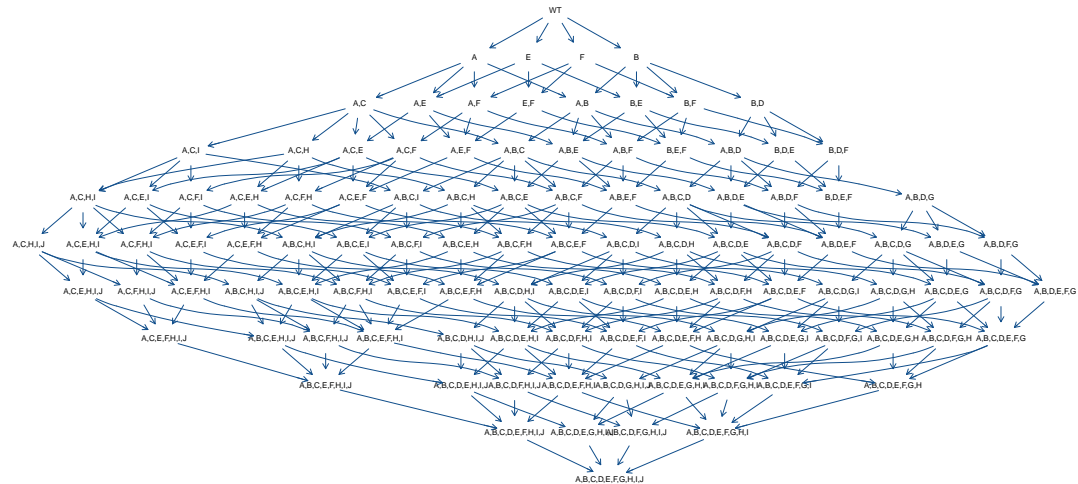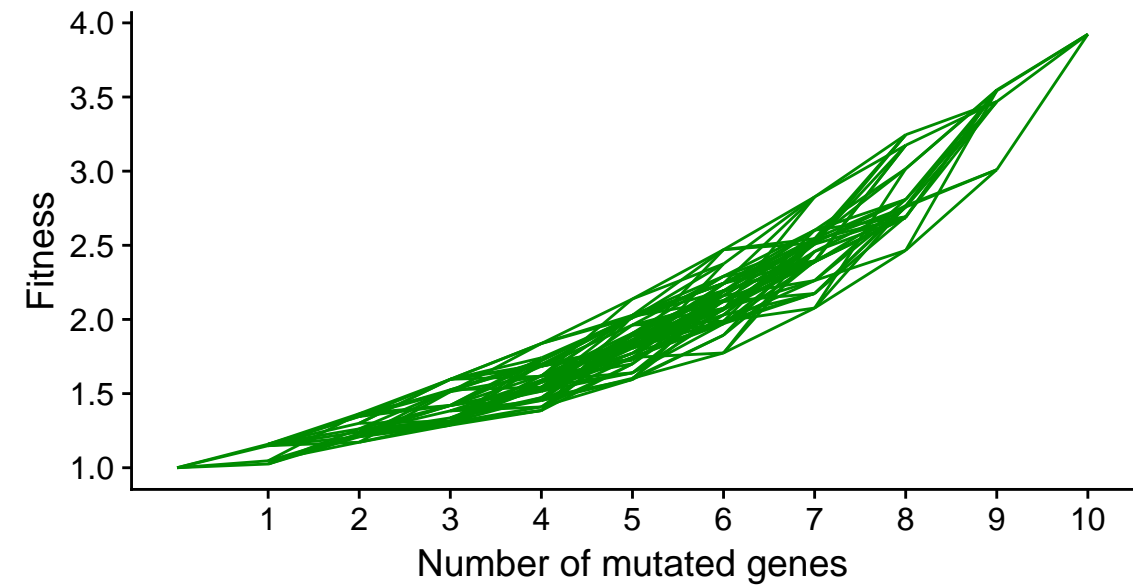

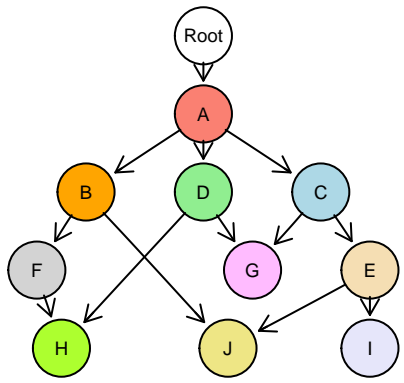

ID **y910g6HDInpD8GSSB**  
 acc genotypes **57**  
 peaks no back 1  
 removed edges 0  
 prop rem edges 0

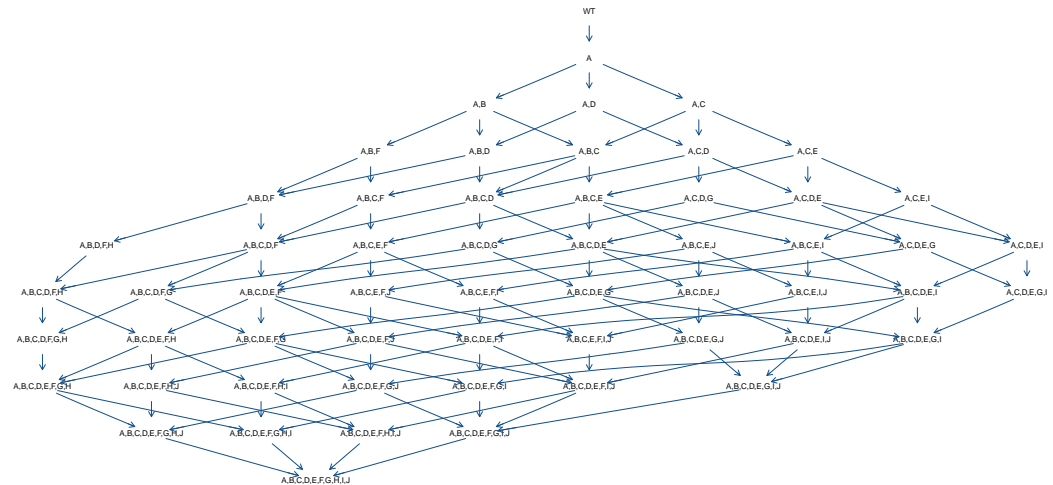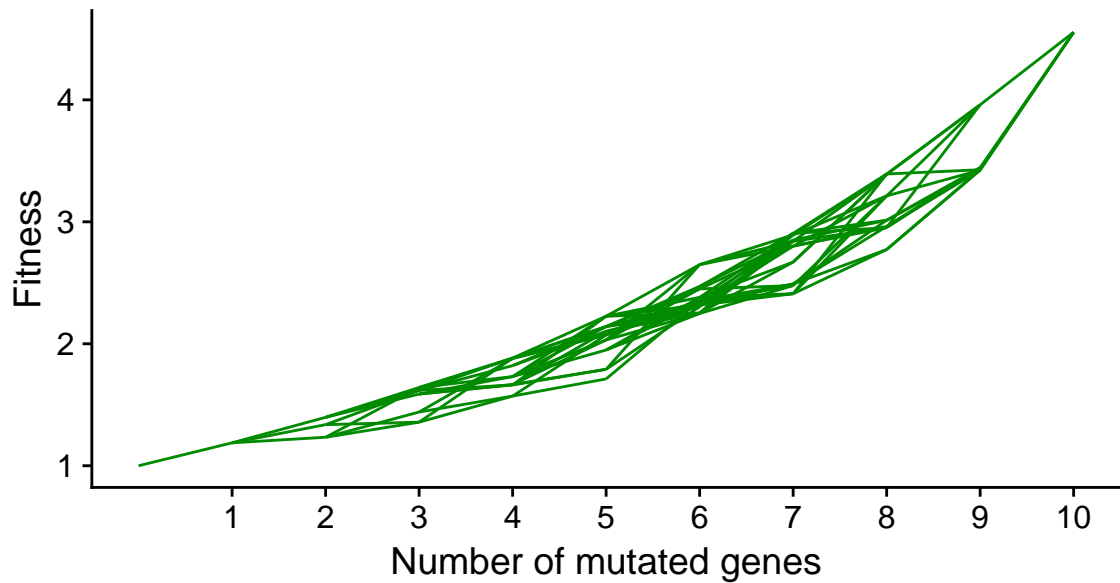

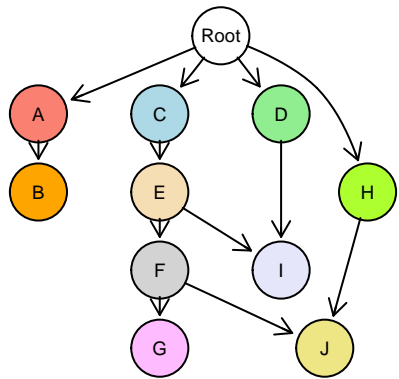

*ID* YbPjwENMtPWo53FW  
*acc genotypes* 96  
*peaks no back* 1  
*removed edges* 0  
*prop rem edges* 0

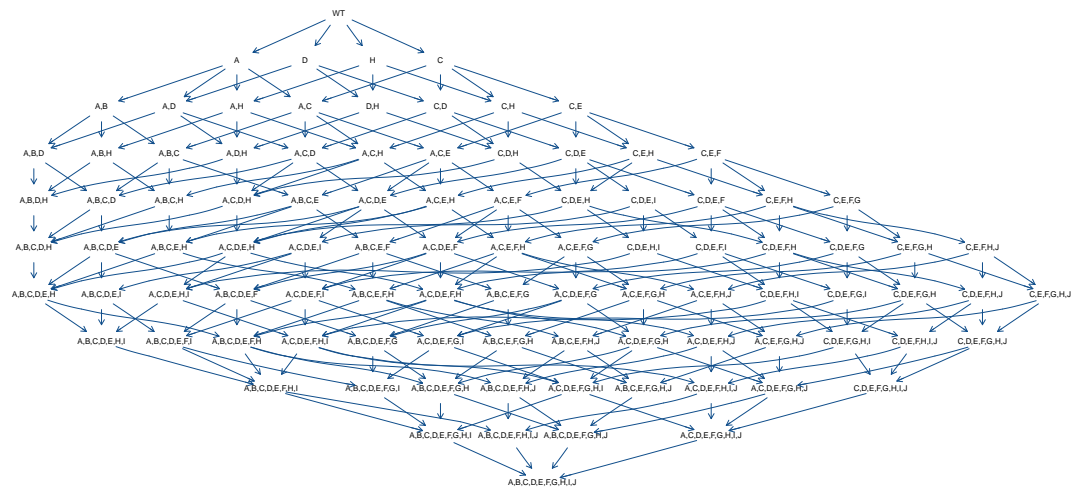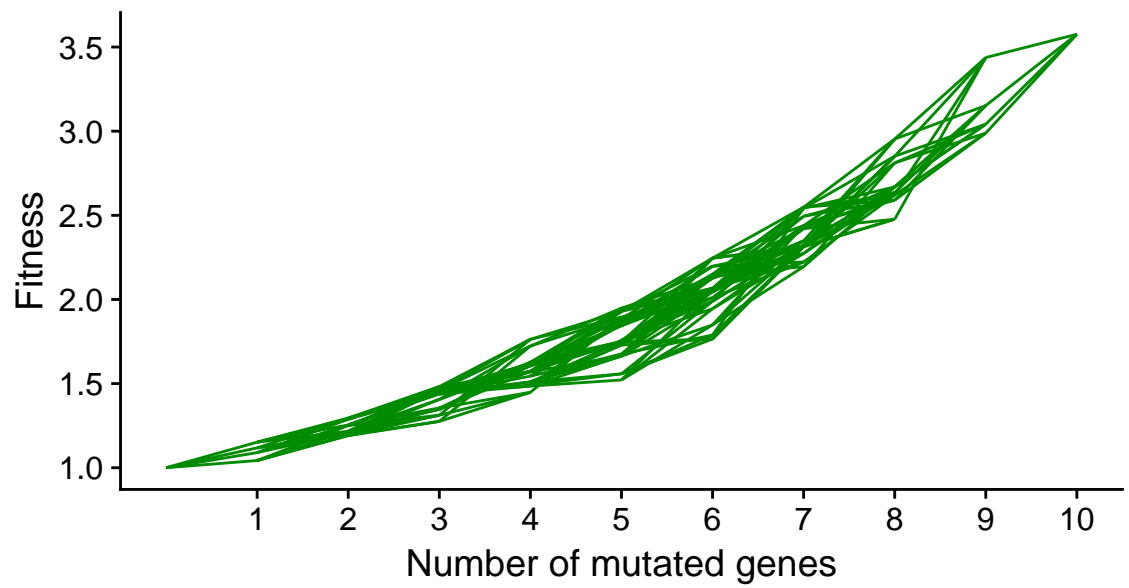

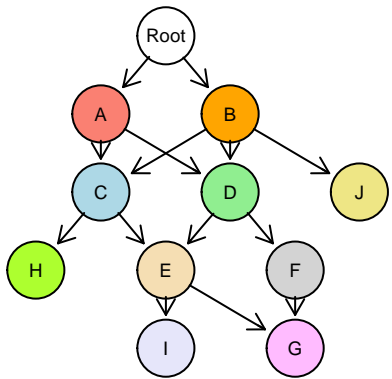

ID YDOzLX10m8IHyrpAK  
 acc genotypes 46  
 peaks no back 1  
 removed edges 0  
 prop rem edges 0

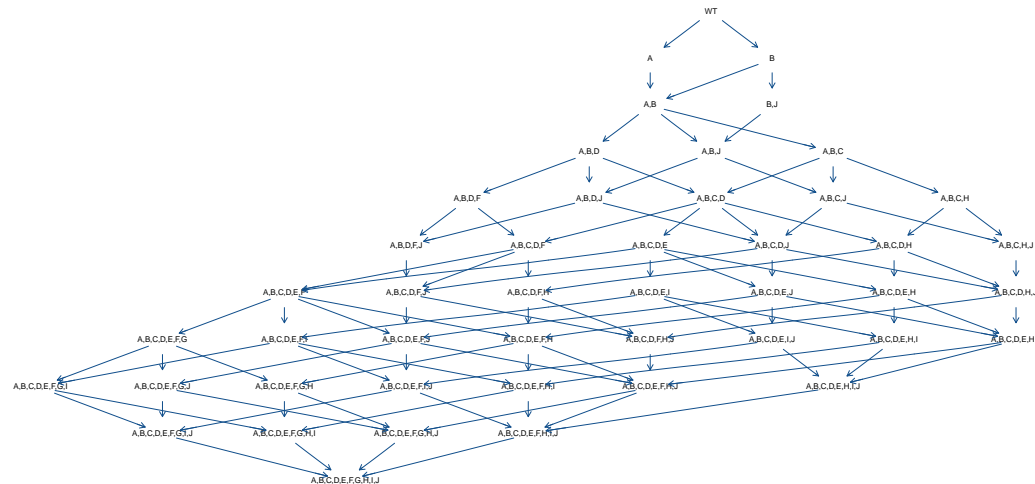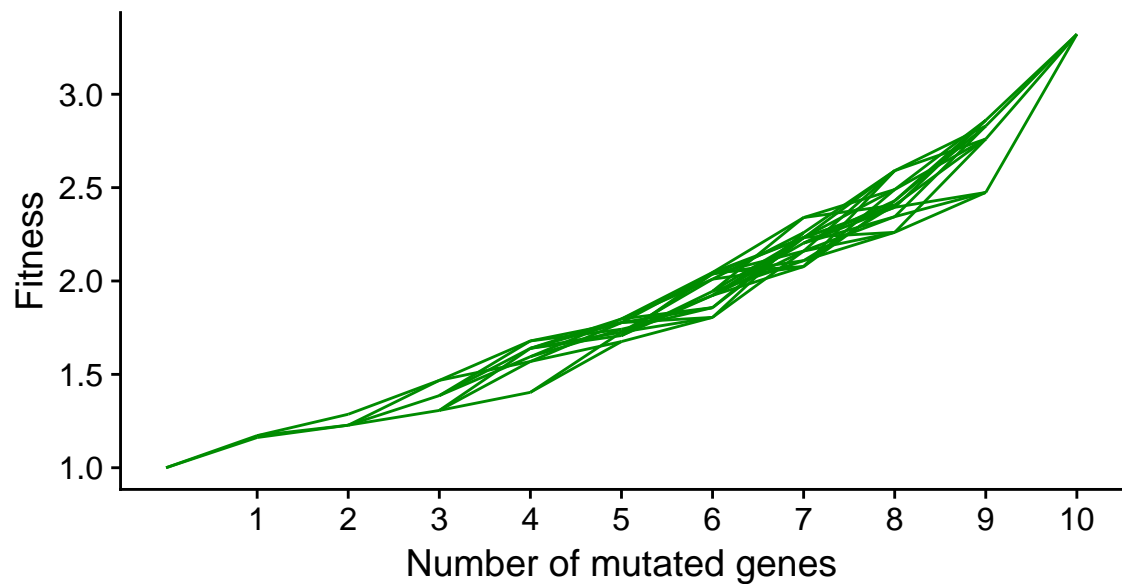



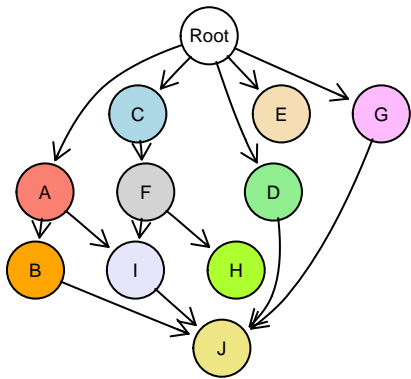

ID **yKg7RfKP7wBk10kV3**  
 acc genotypes **132**  
 peaks no back 1  
 removed edges 0  
 prop rem edges 0

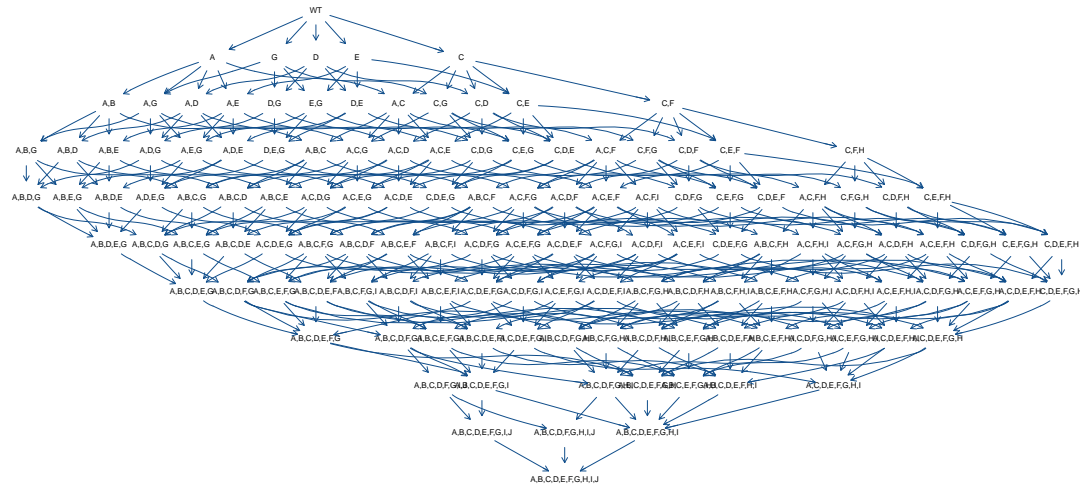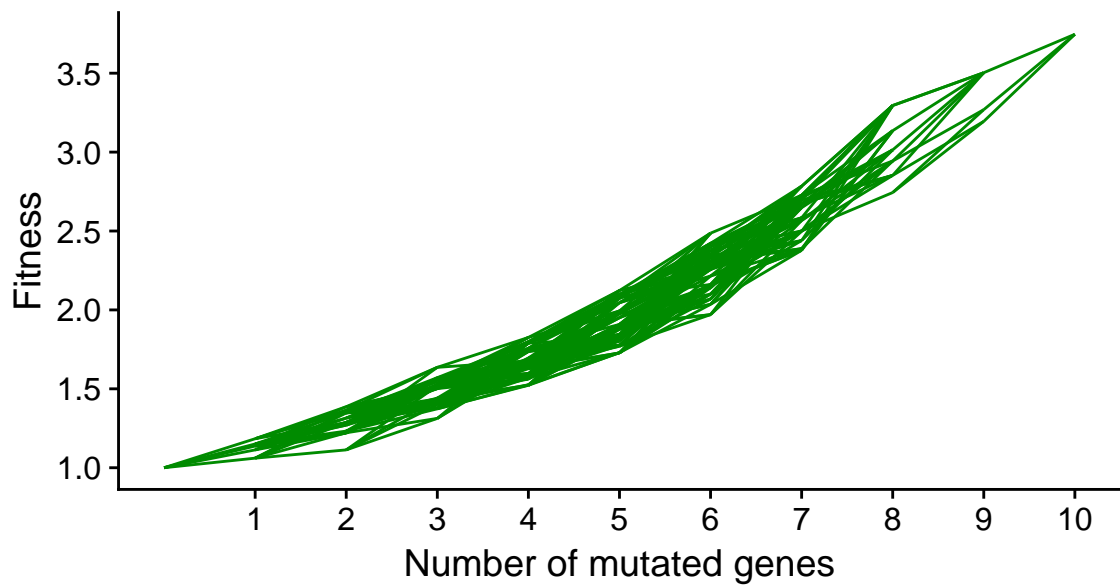

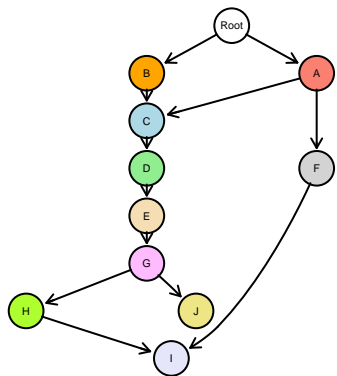

ID YINcYnp363stUXfS  
 acc genotypes 22  
 peaks no back 1  
 removed edges 0  
 prop rem edges 0

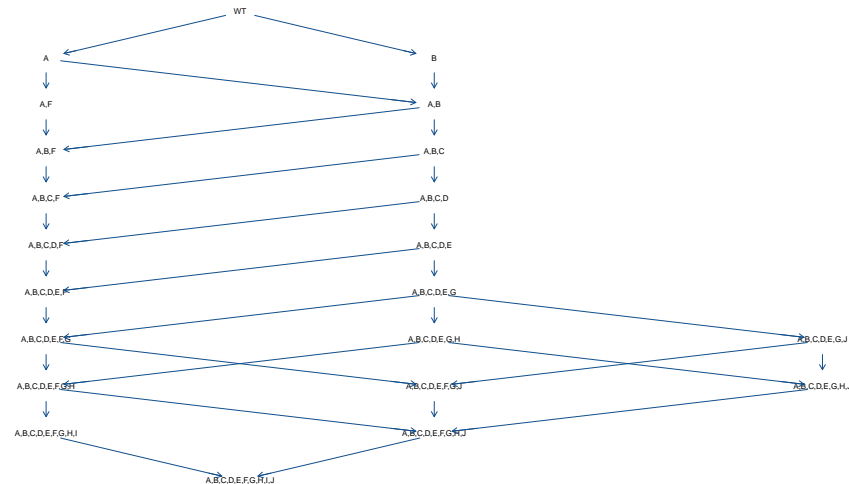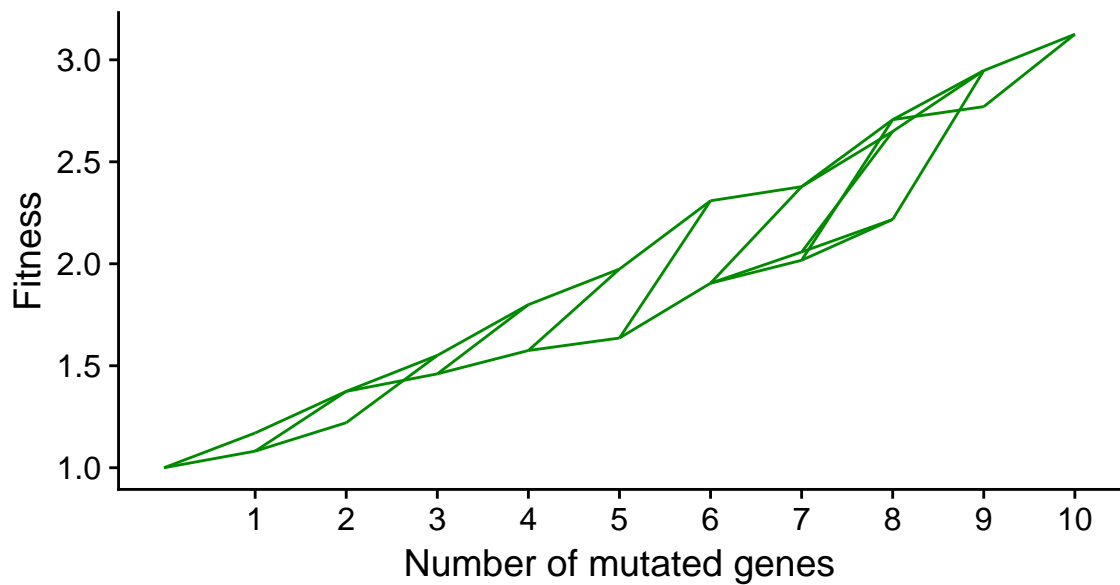

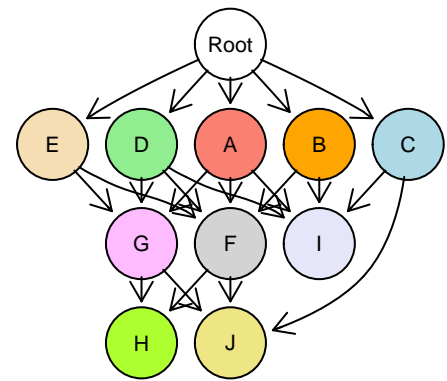

ID **YlnEDjC9bTawZFRa**  
 acc genotypes **52**  
 peaks no back 1  
 removed edges 0  
 prop rem edges 0

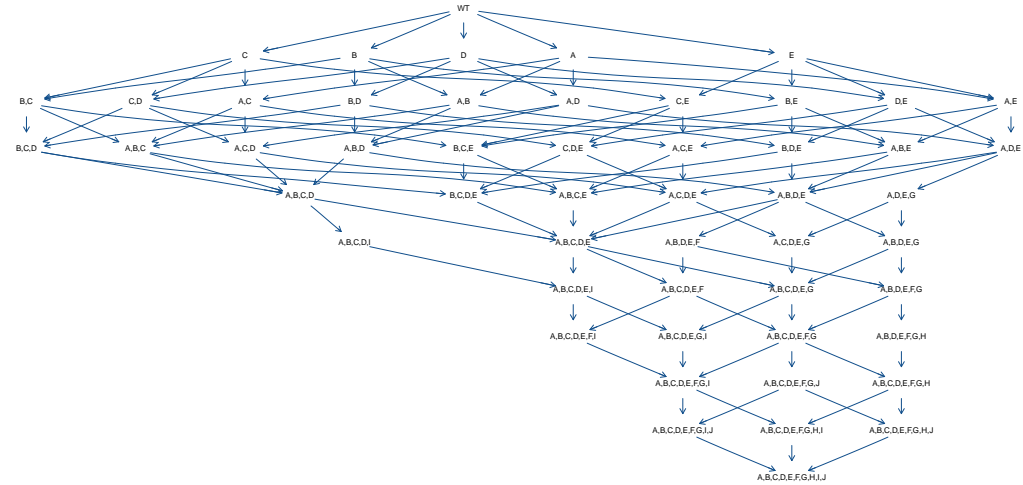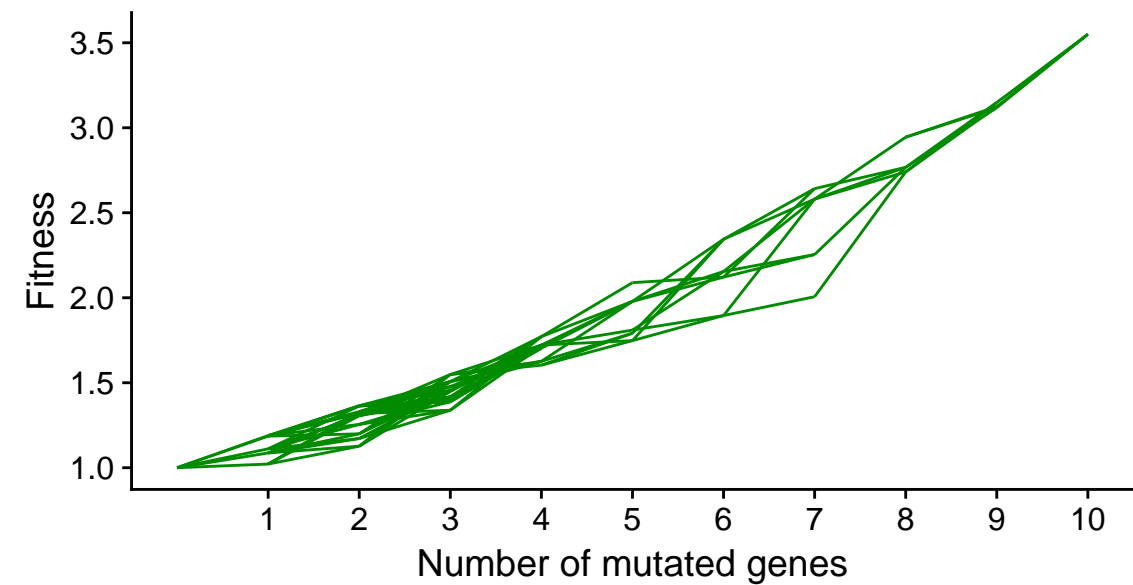

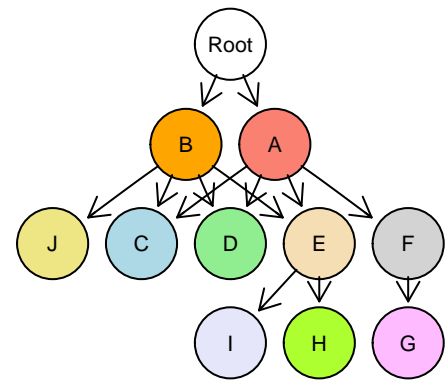

ID YsJ3QBe72KOpkYgG  
 acc genotypes 126  
 peaks no back 1  
 removed edges 0  
 prop rem edges 0

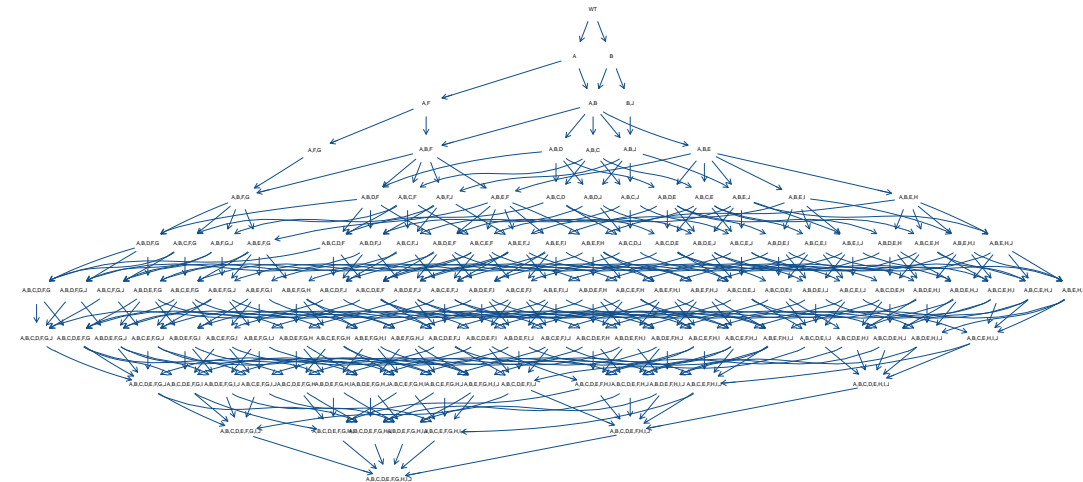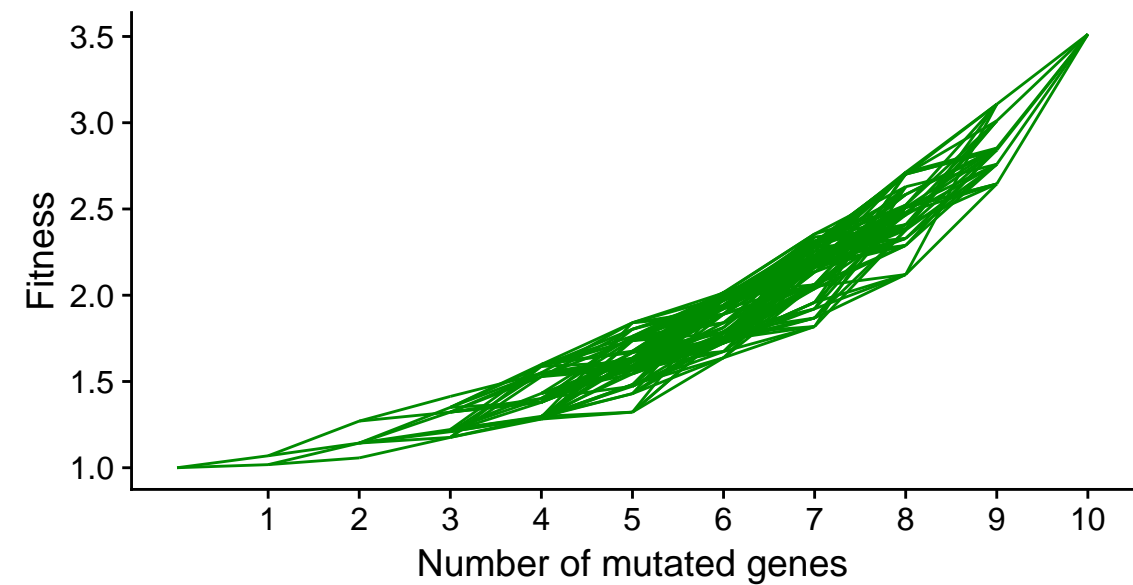

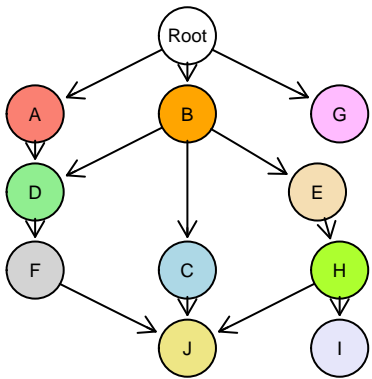

*ID* yUkCSfeekAS3UsYq  
*acc genotypes* 72  
*peaks no back* 1  
*removed edges* 0  
*prop rem edges* 0

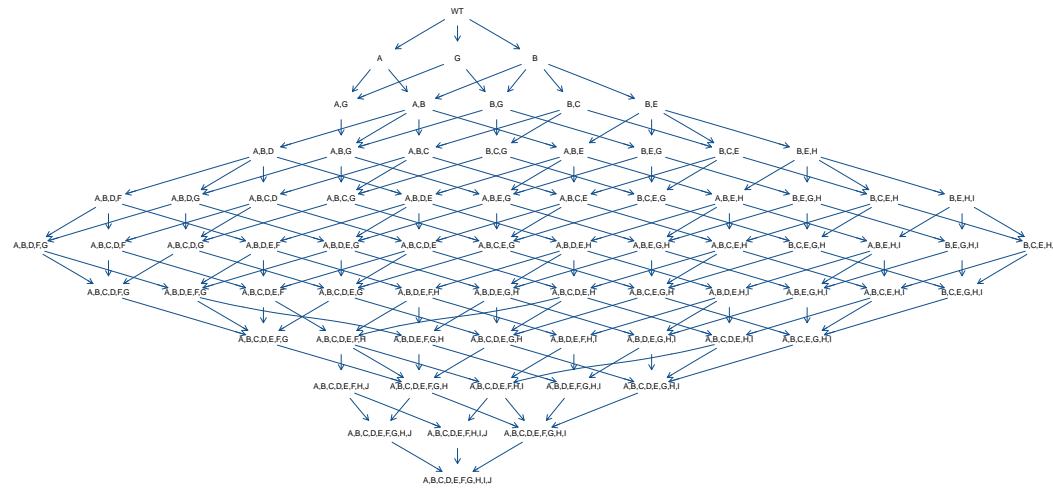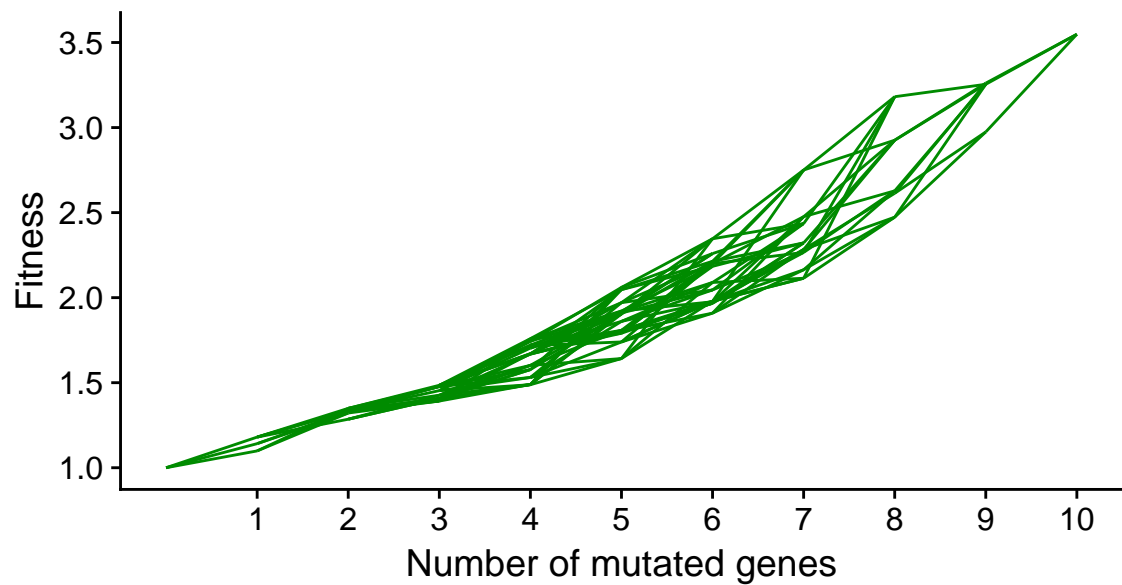

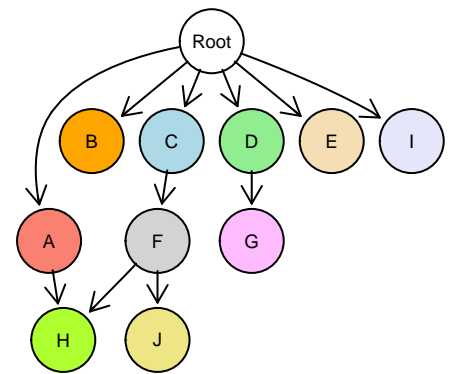

*ID* z1gqmdhtodgm6biP  
*acc genotypes* 240  
*peaks no back* 1  
*removed edges* 0  
*prop rem edges* 0

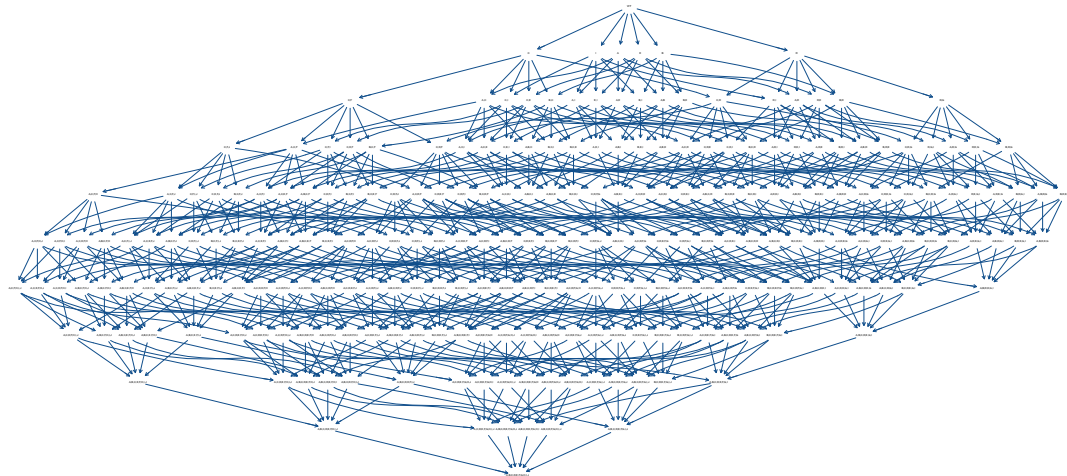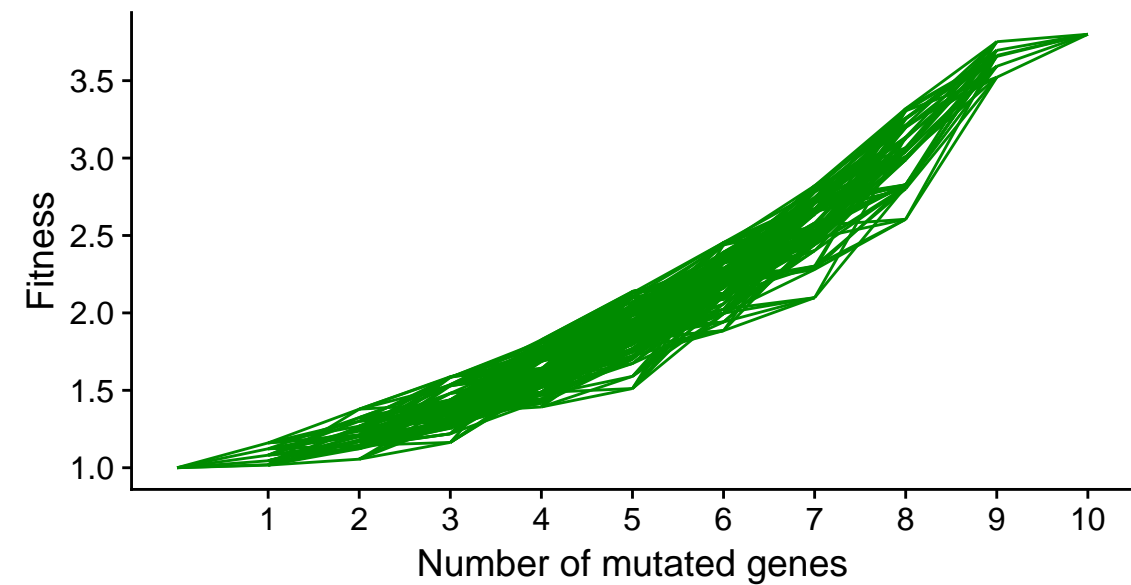

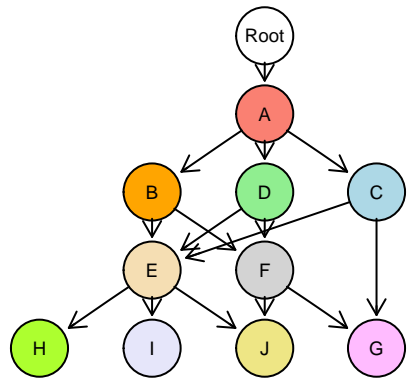

ID **z55GMs5PYH8kzvrX**  
 acc genotypes **32**  
 peaks no back **1**  
 removed edges **0**  
 prop rem edges **0**

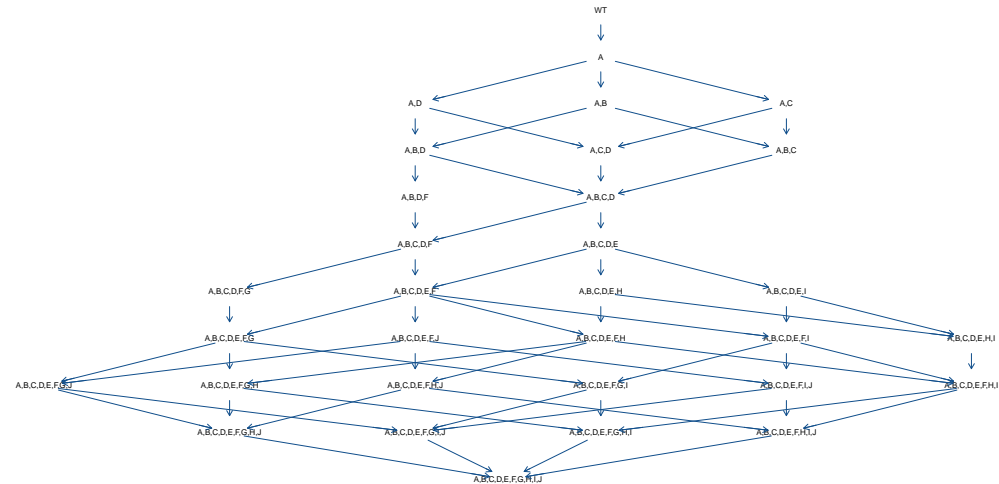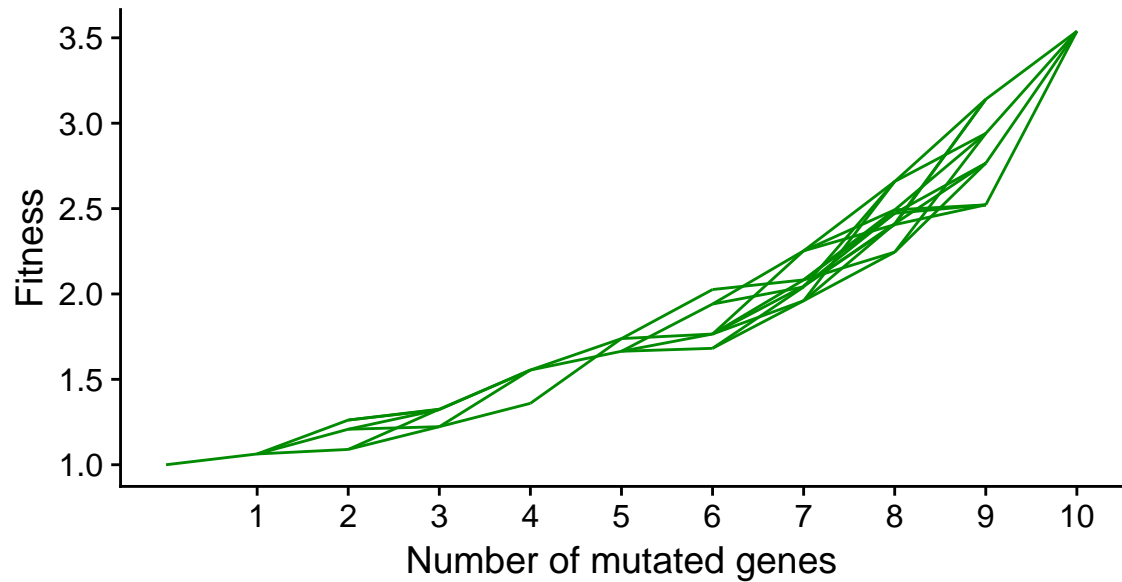

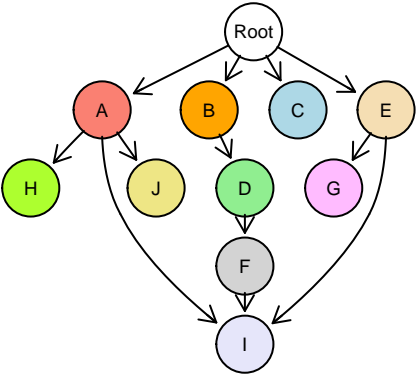

*ID* ZEOZqZ8hAfpI29IT  
*acc genotypes* 136  
*peaks no back* 1  
*removed edges* 0  
*prop rem edges* 0

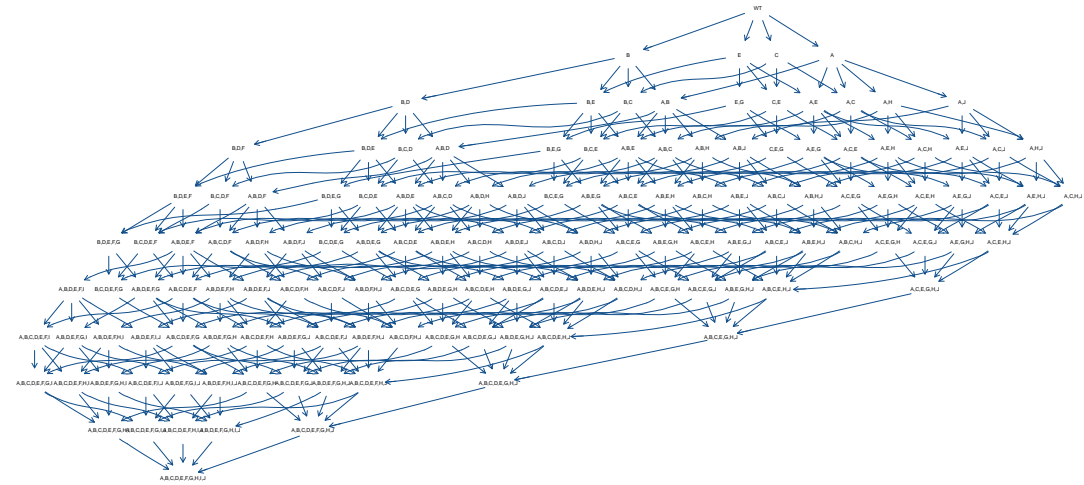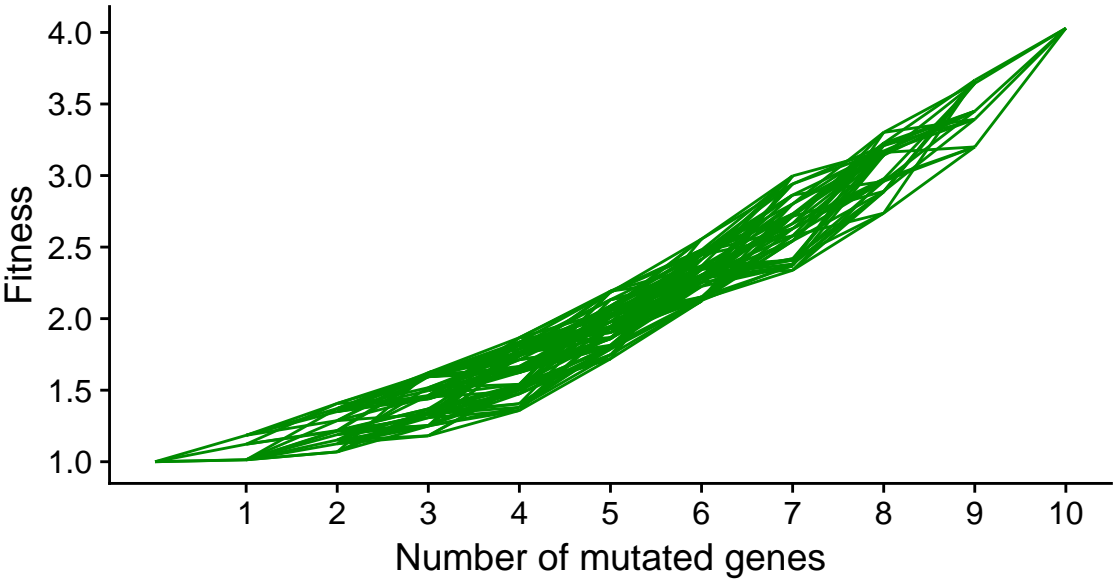



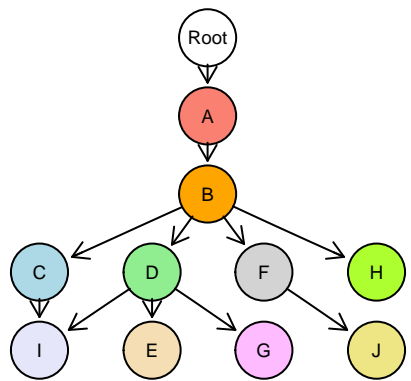

*ID*      **zibjAEA10MPGwv10fw**  
*acc genotypes*    **86**  
*peaks no back*     1  
*removed edges*    0  
*prop rem edges*    0

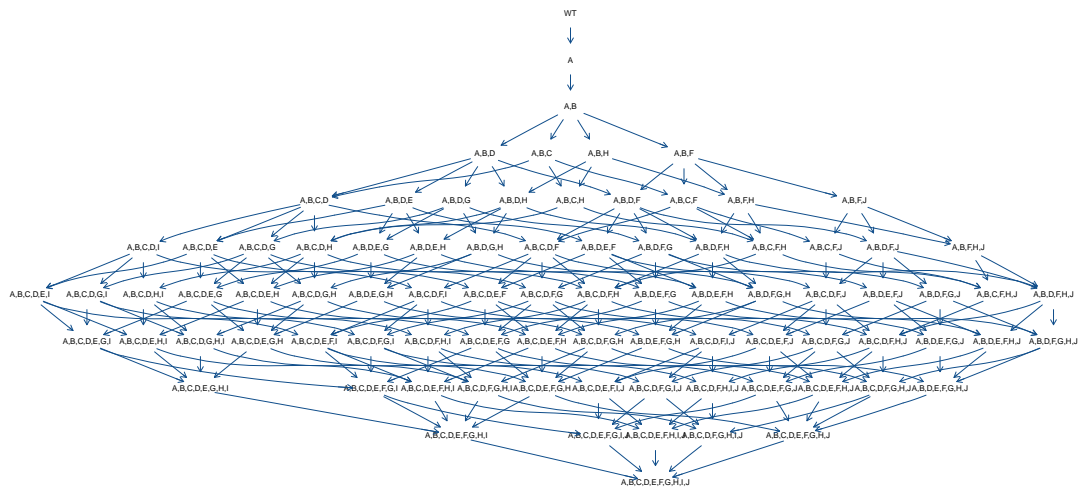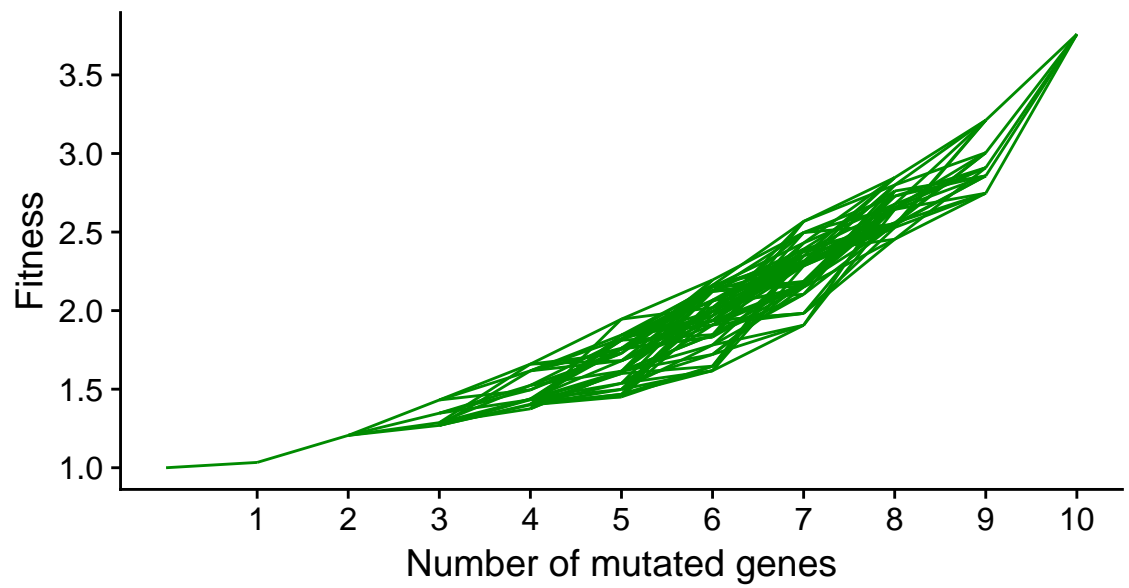

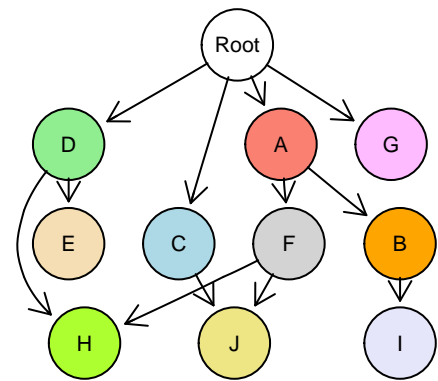

*ID* zwBgTR5JXPWHn1B  
*acc genotypes* 138  
*peaks no back* 1  
*removed edges* 0  
*prop rem edges* 0

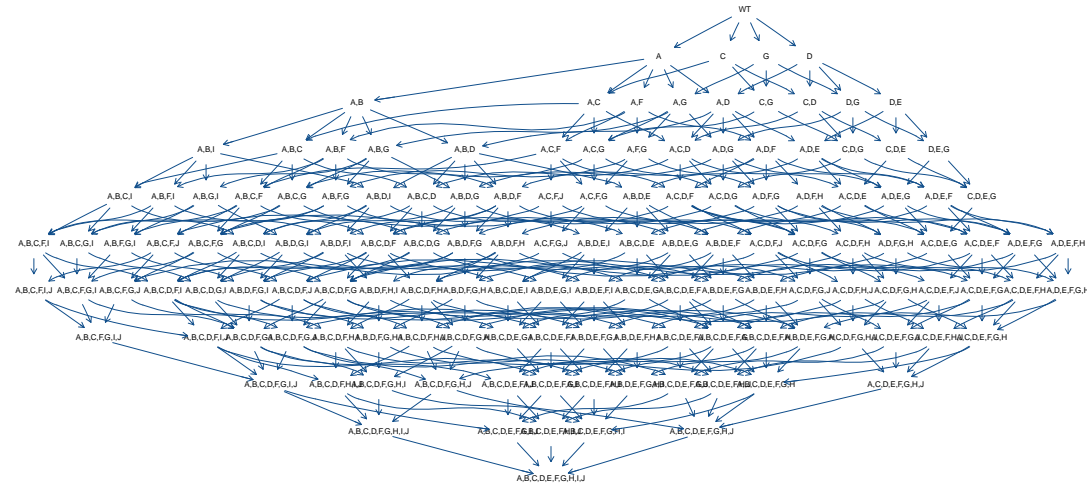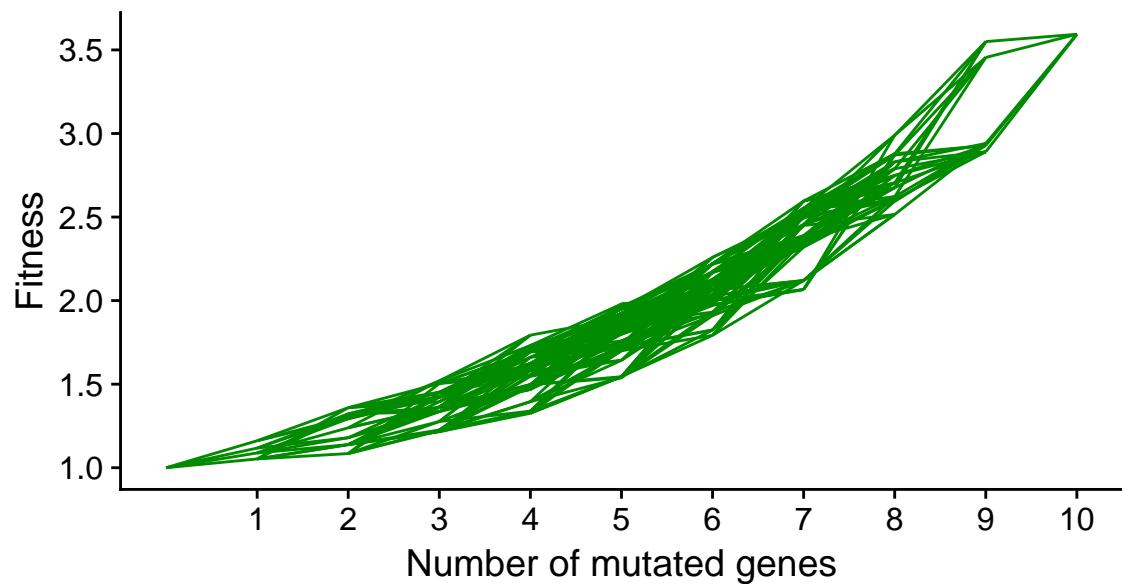

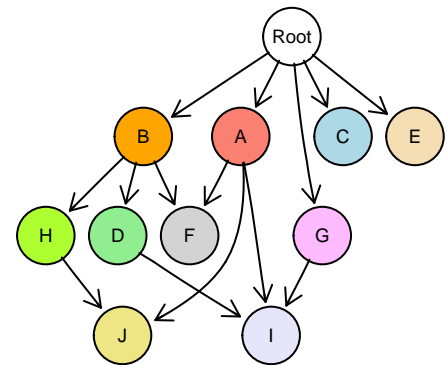

ID **1007yB4hzcMcCLWhO**  
 acc genotypes **168**  
 peaks no back **15**  
 removed edges **123**  
 prop rem edges **0.228**

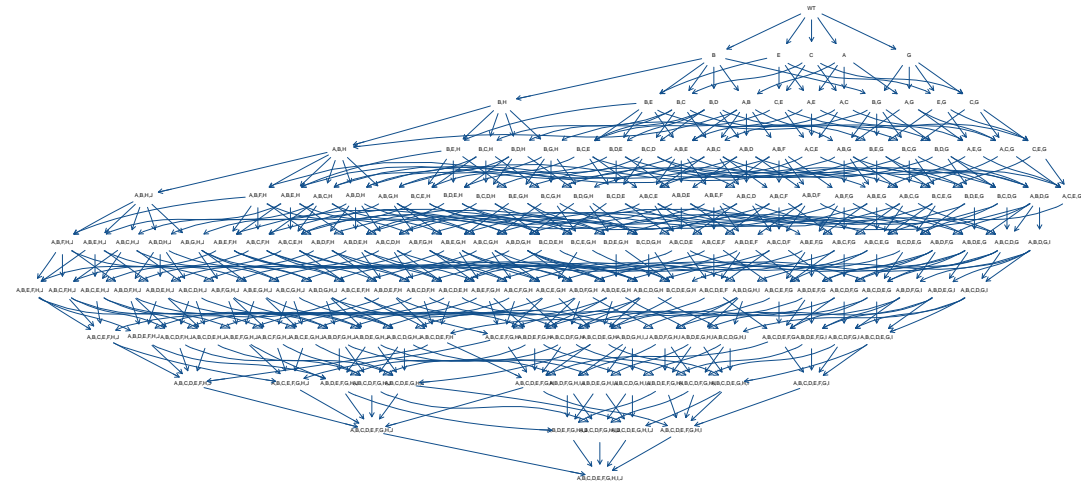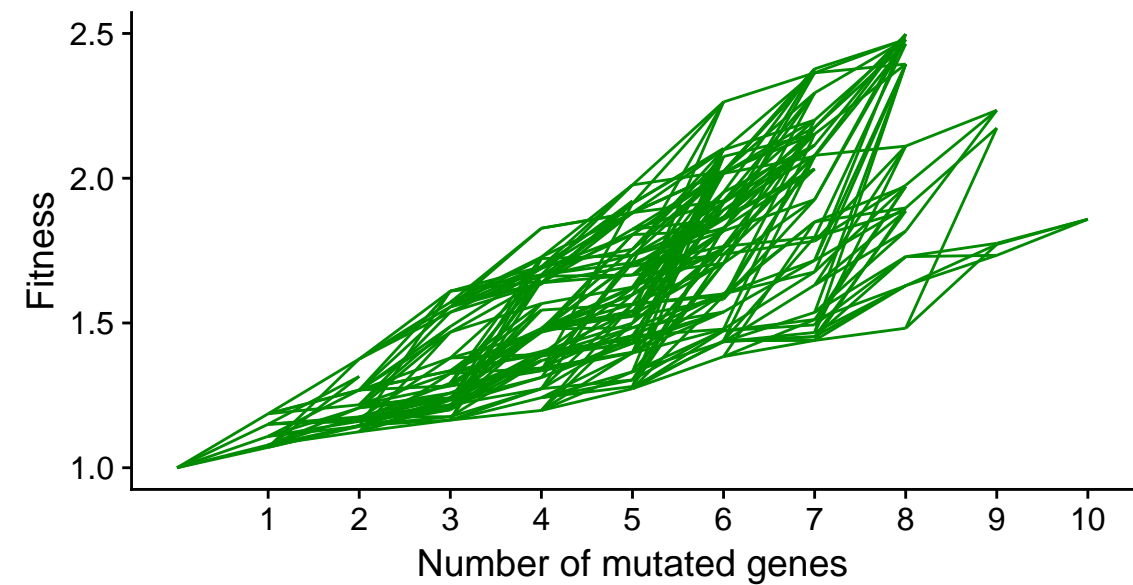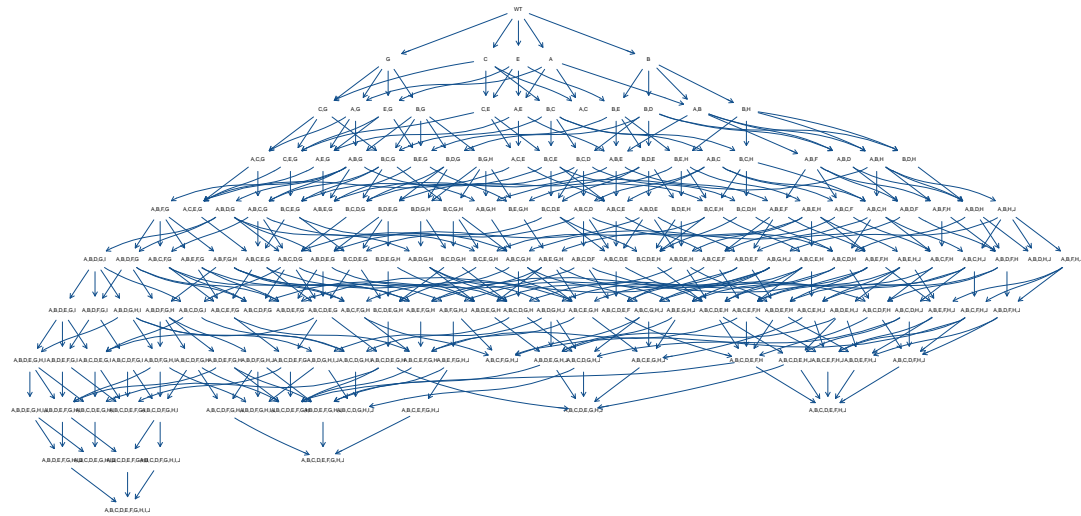

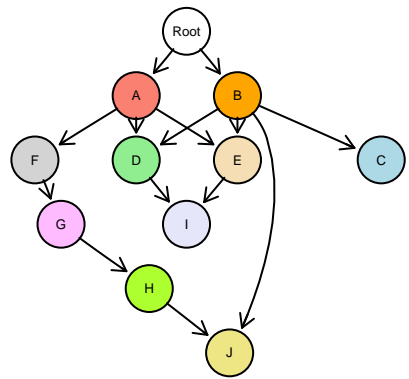

ID 1cfjEhrDN713Rg8k  
 acc genotypes 57  
 peaks no back 7  
 removed edges 19  
 prop rem edges 0.15

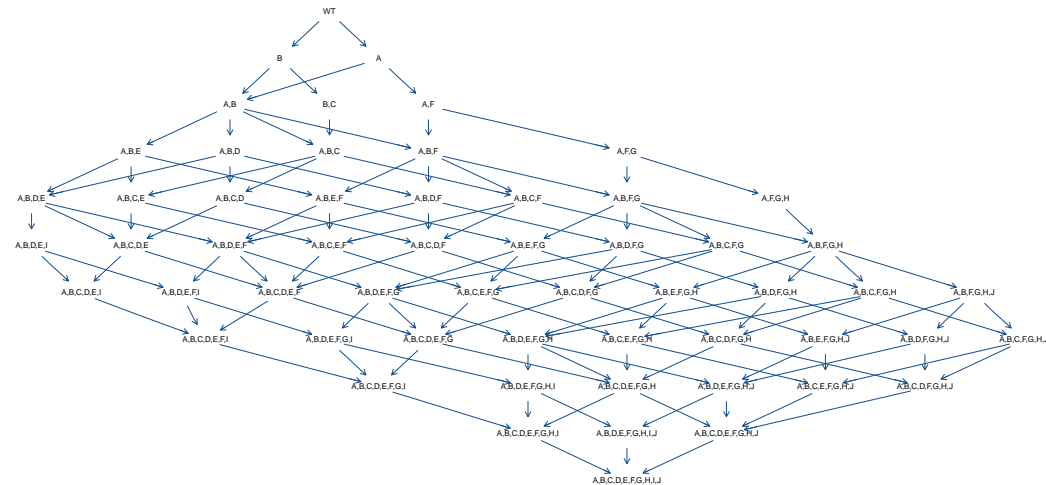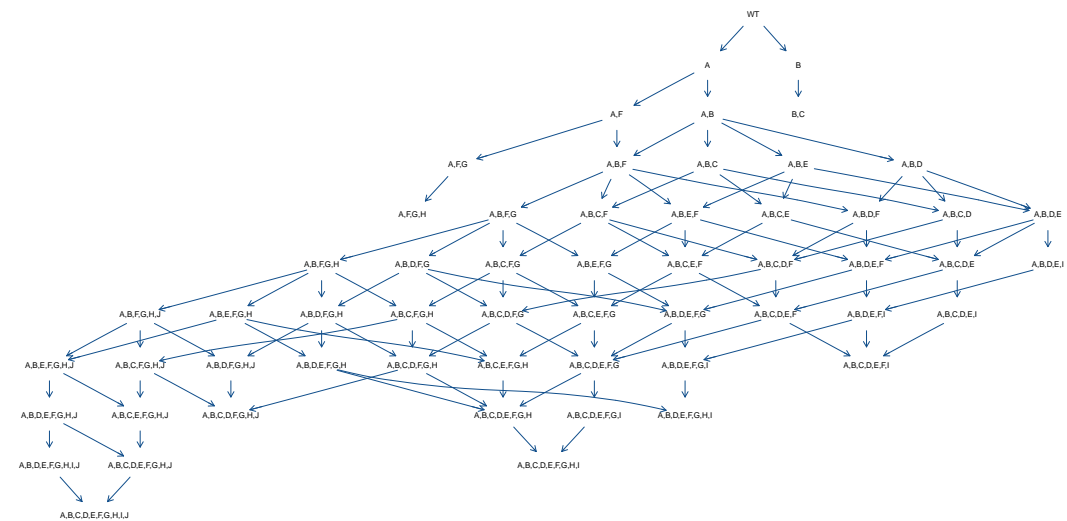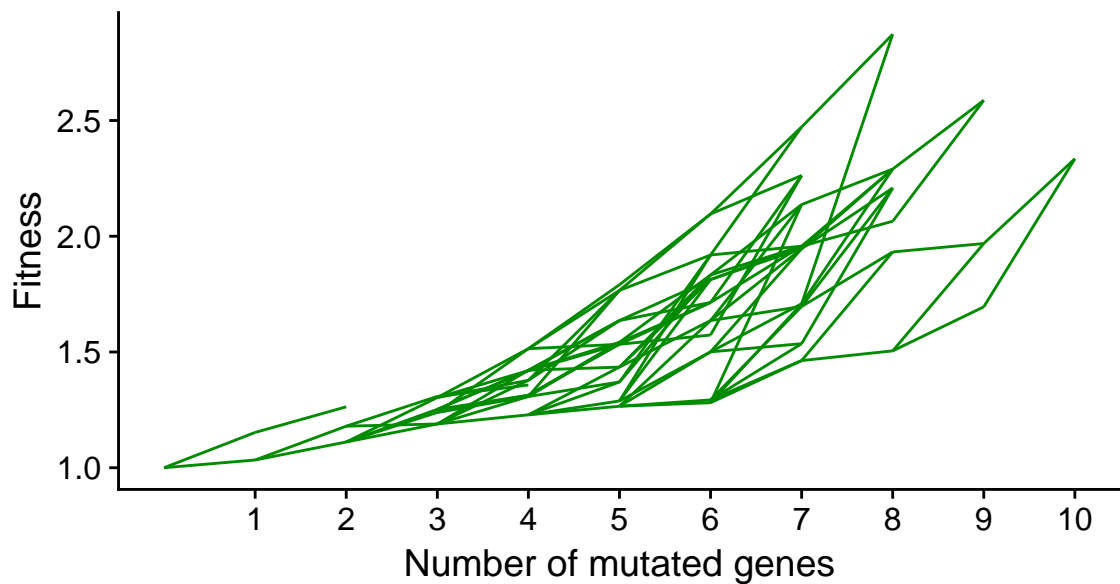

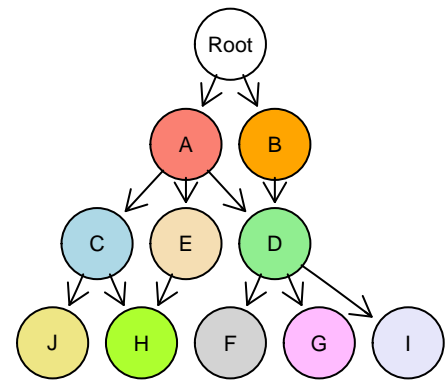

ID [1fJ9gvVlxHu10I4I](#)  
 acc genotypes 82  
 peaks no back 10  
 removed edges 36  
 prop rem edges 0.167

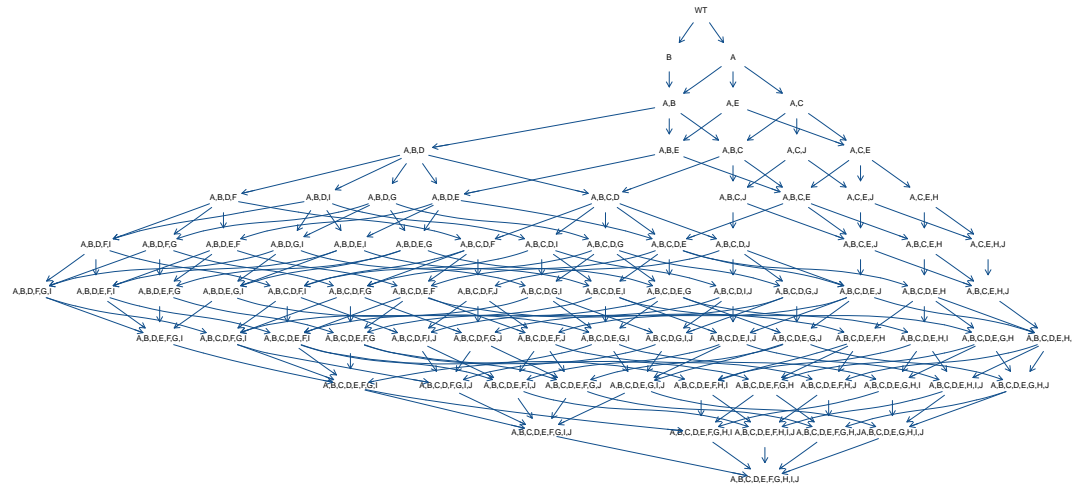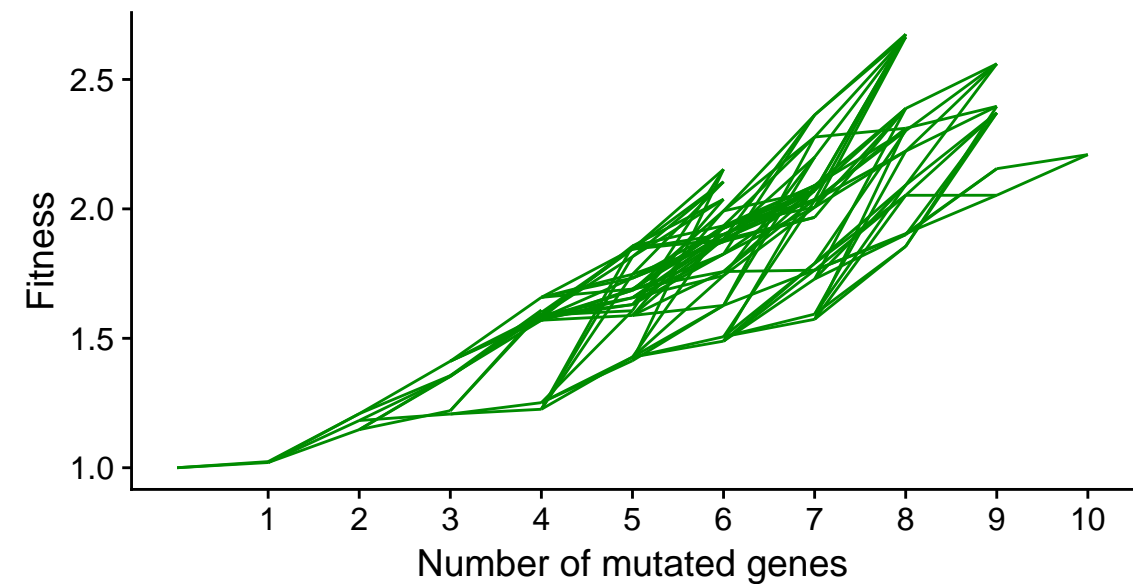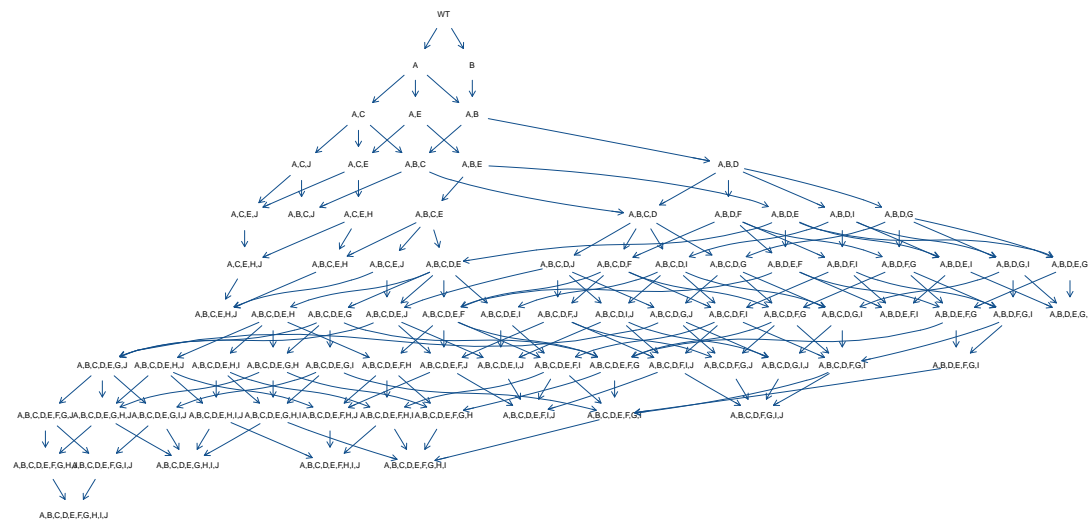

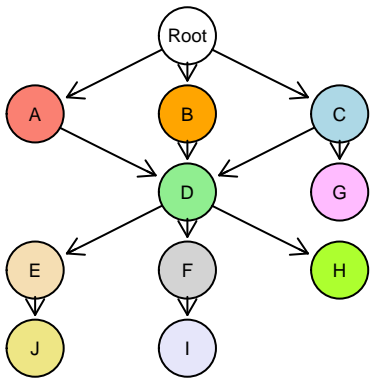

ID 1LRNI4YXQOtosQeO  
 acc genotypes 48  
 peaks no back 7  
 removed edges 20  
 prop rem edges 0.189

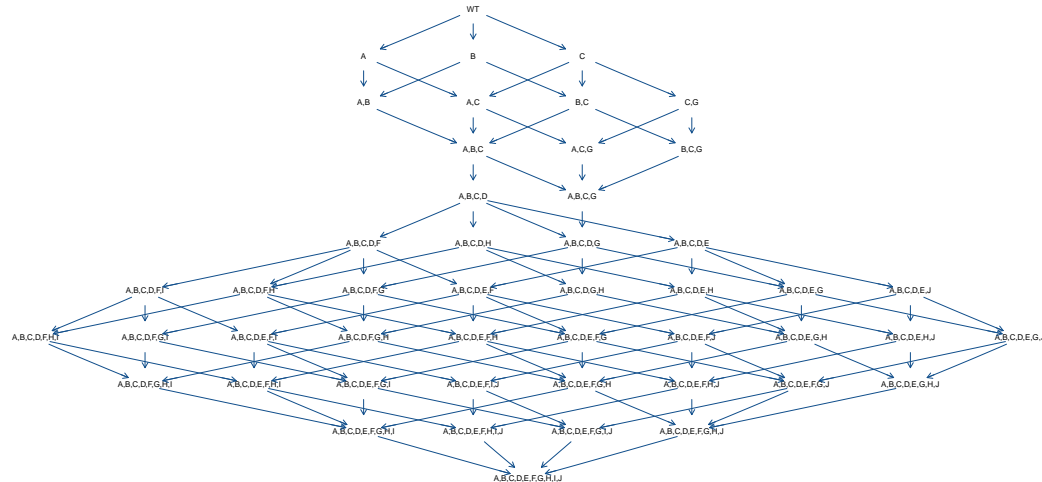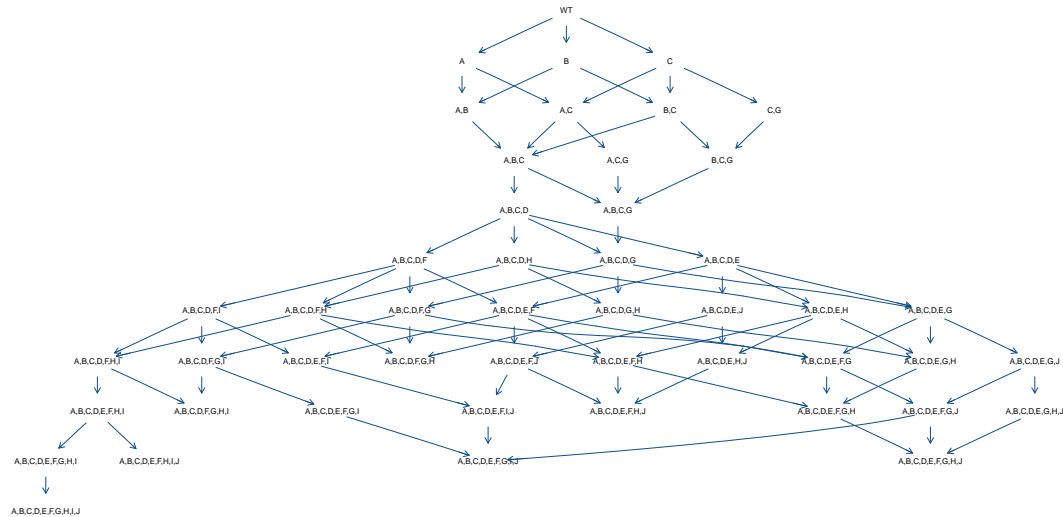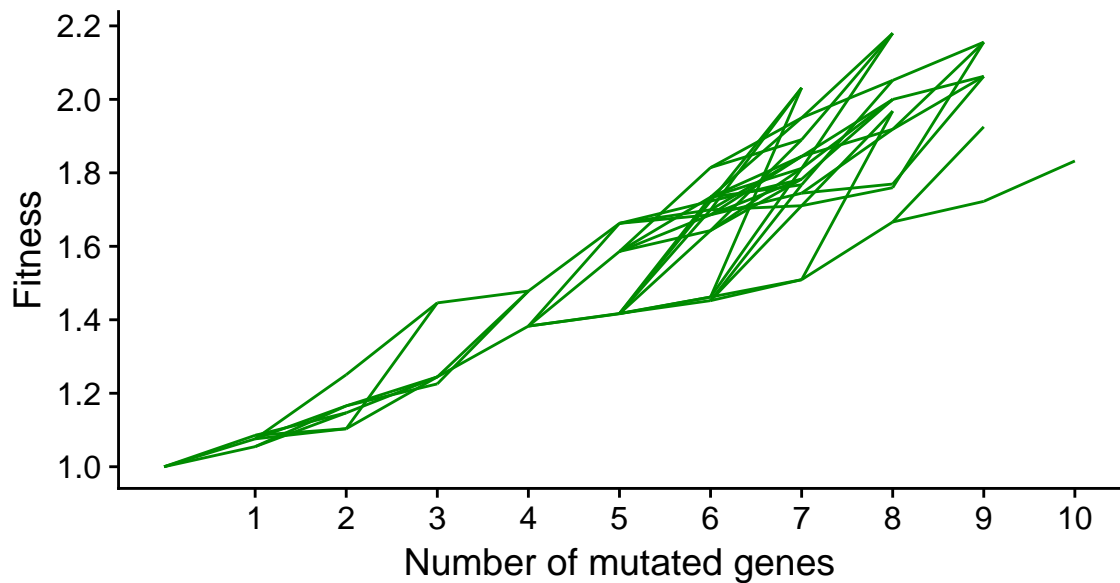

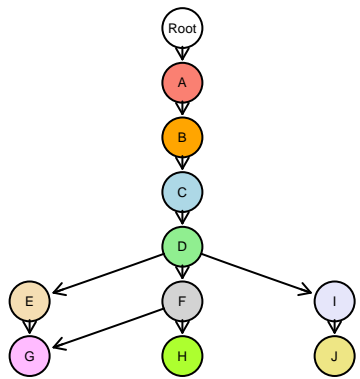

ID 24psYb2Z5uoeEiGL  
 acc genotypes 28  
 peaks no back 5  
 removed edges 9  
 prop rem edges 0.18

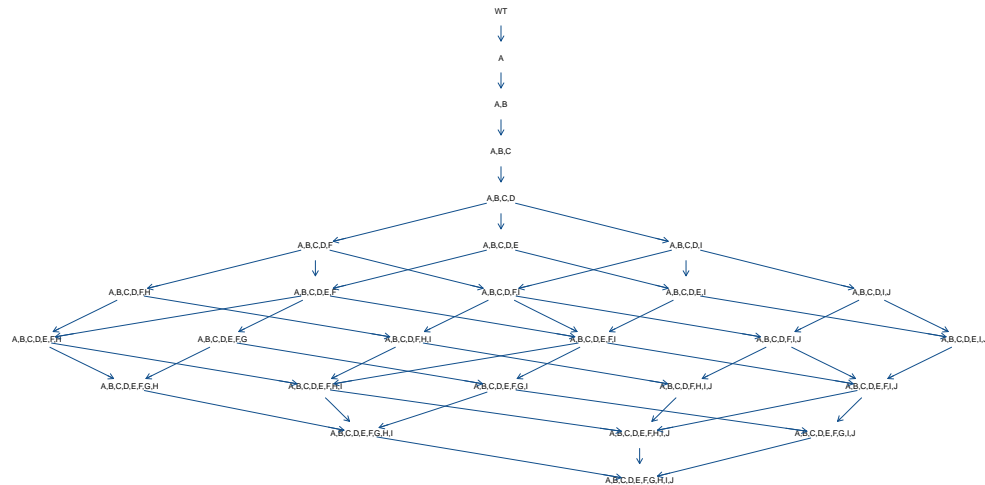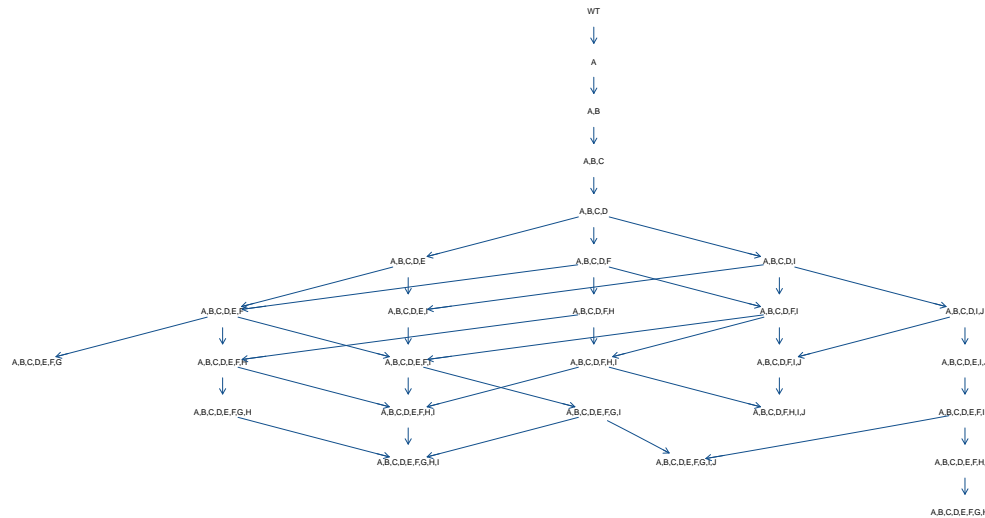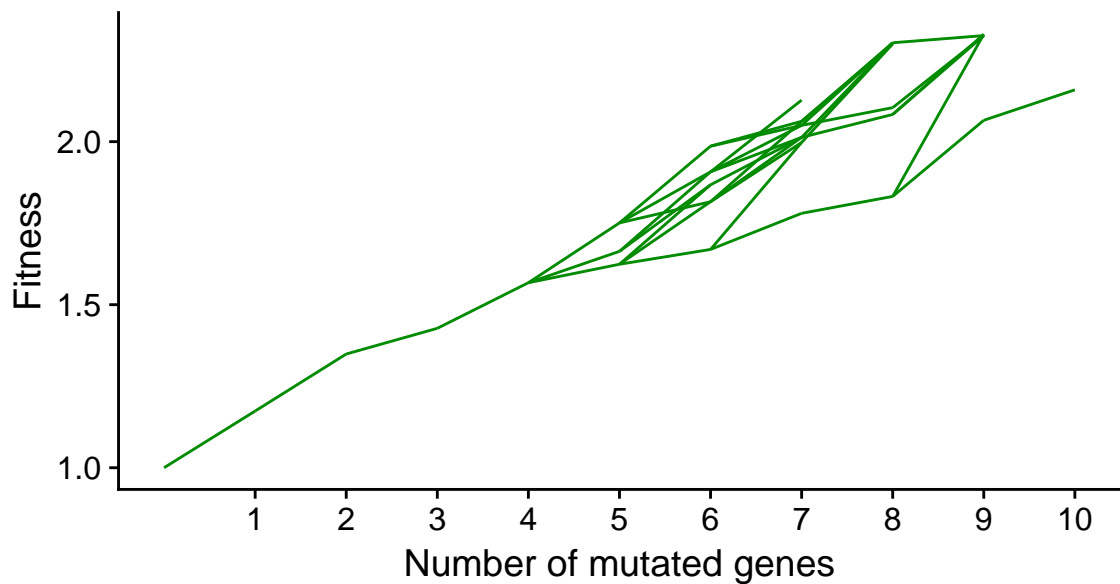

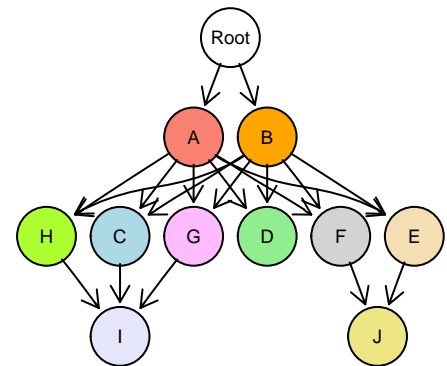

ID 26j4DR9Ab9swRweC  
 acc genotypes 93  
 peaks no back 10  
 removed edges 40  
 prop rem edges 0.149

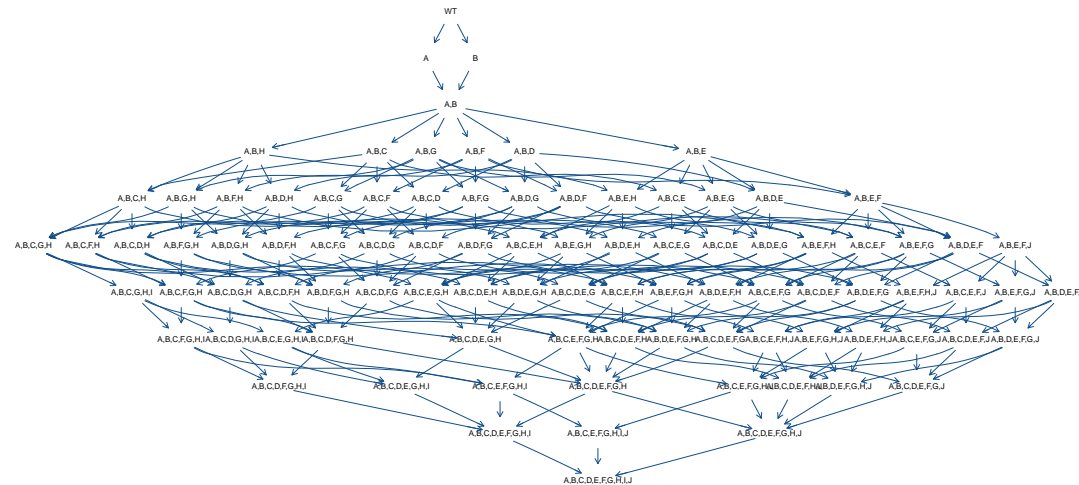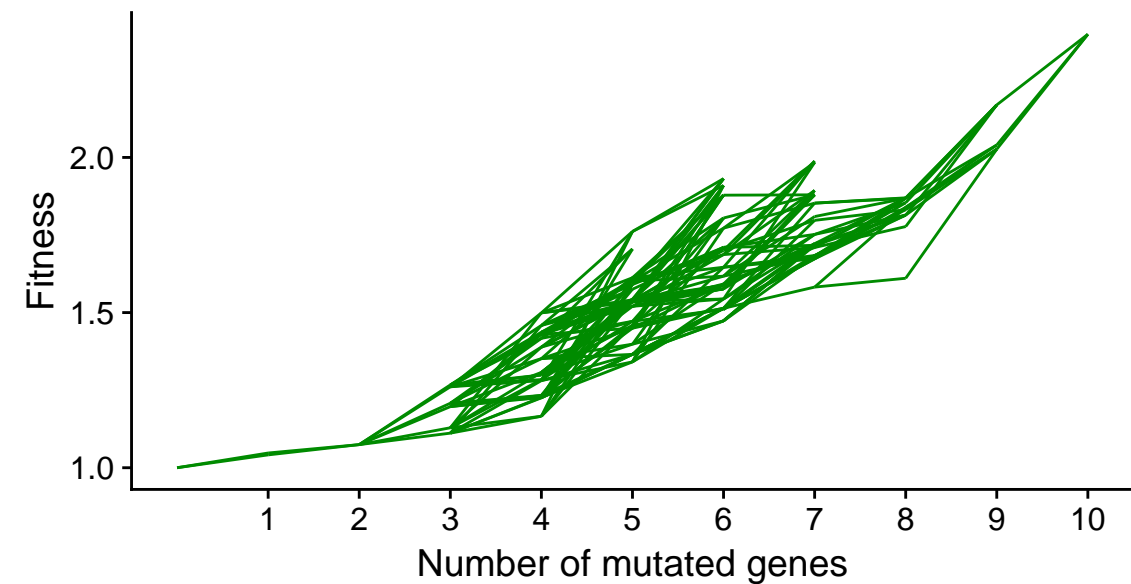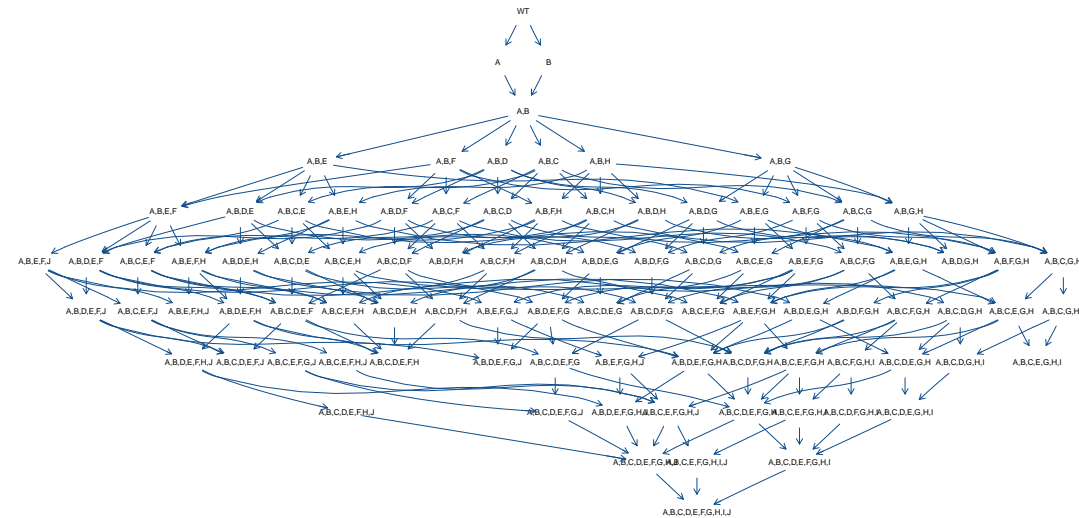



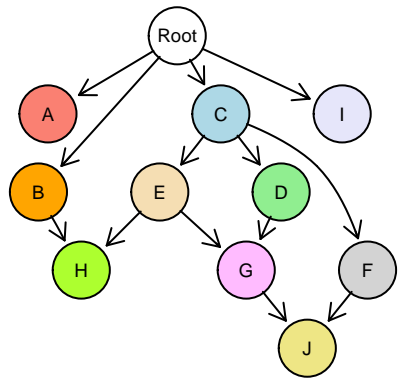

ID 29J8aMCesoGoSpvM  
 acc genotypes 124  
 peaks no back 10  
 removed edges 55  
 prop rem edges 0.149

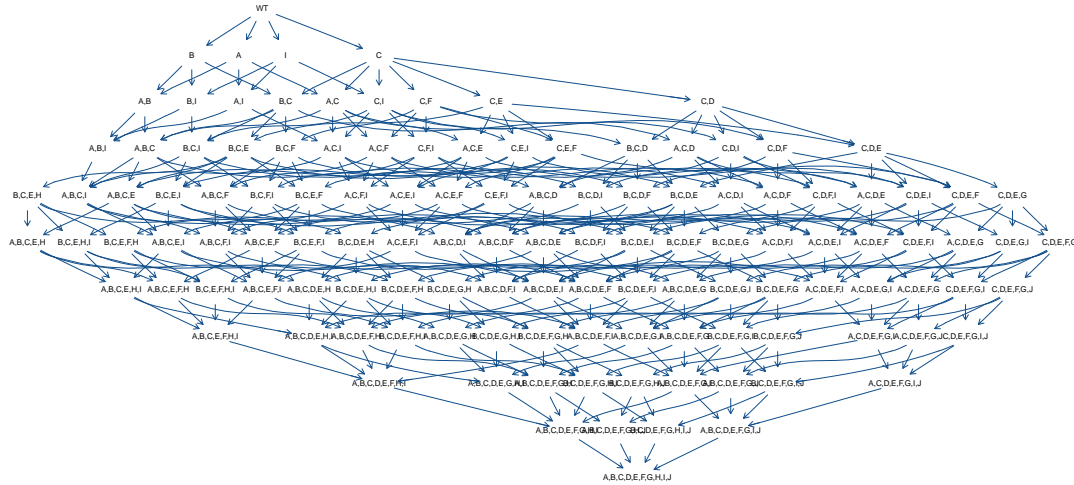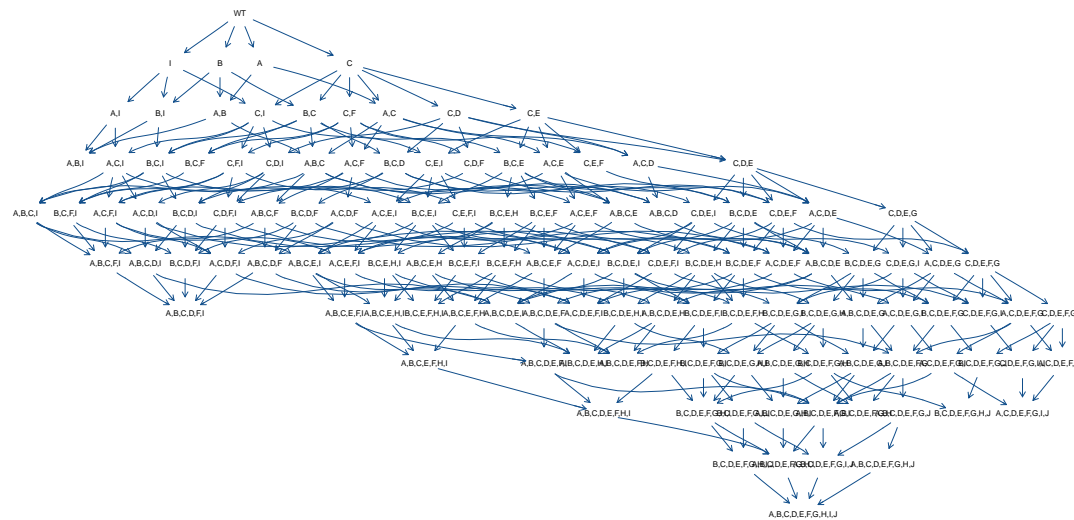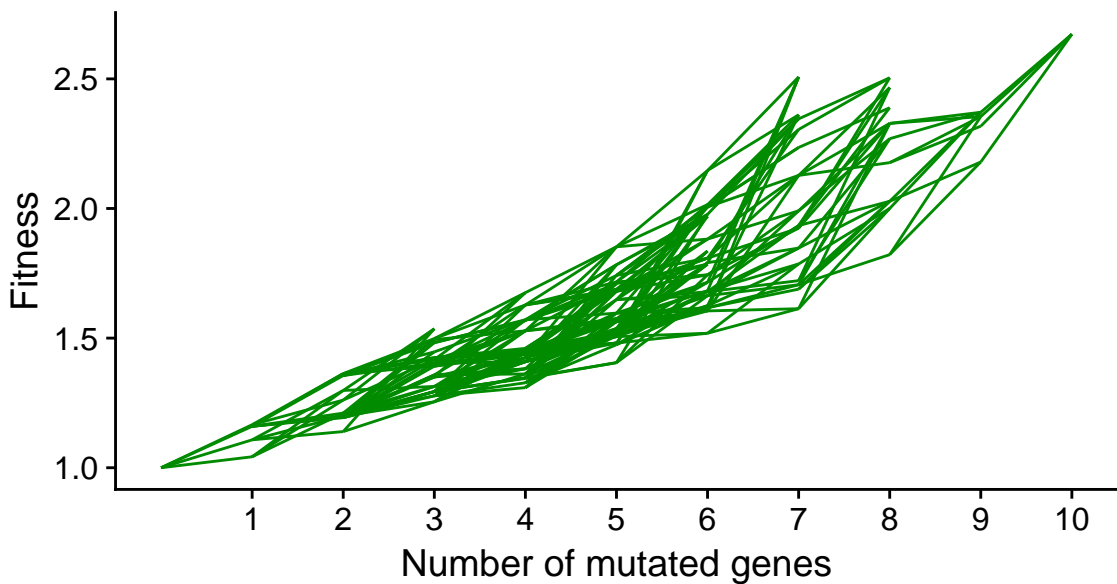

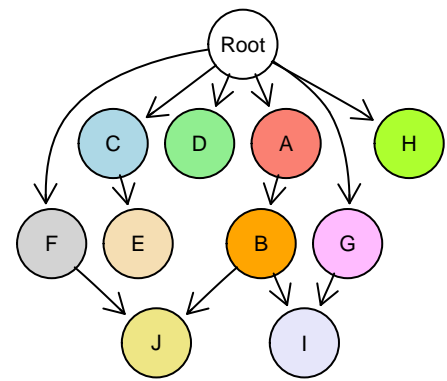

ID **2e8NW3WSIIdSHqm**  
 acc genotypes **204**  
 peaks no back **16**  
 removed edges **139**  
 prop rem edges **0.206**

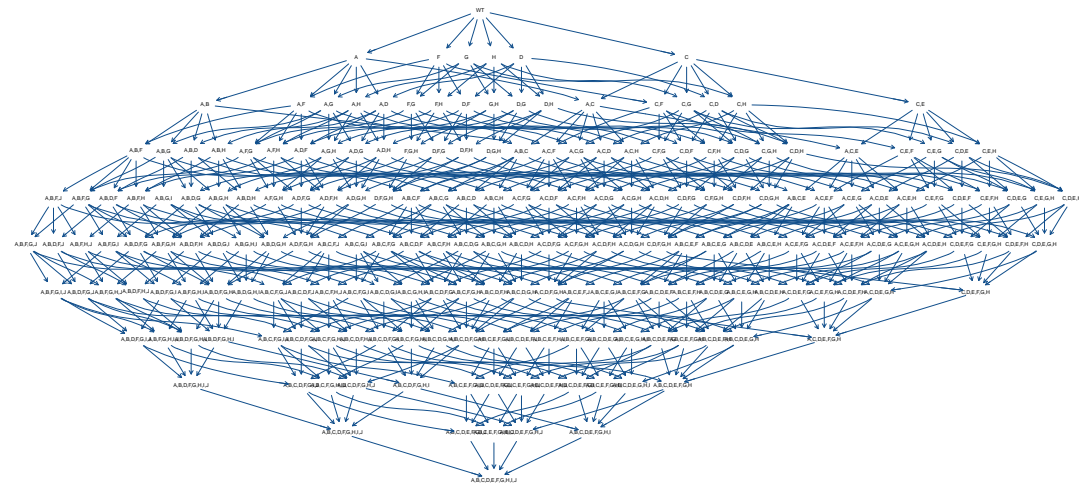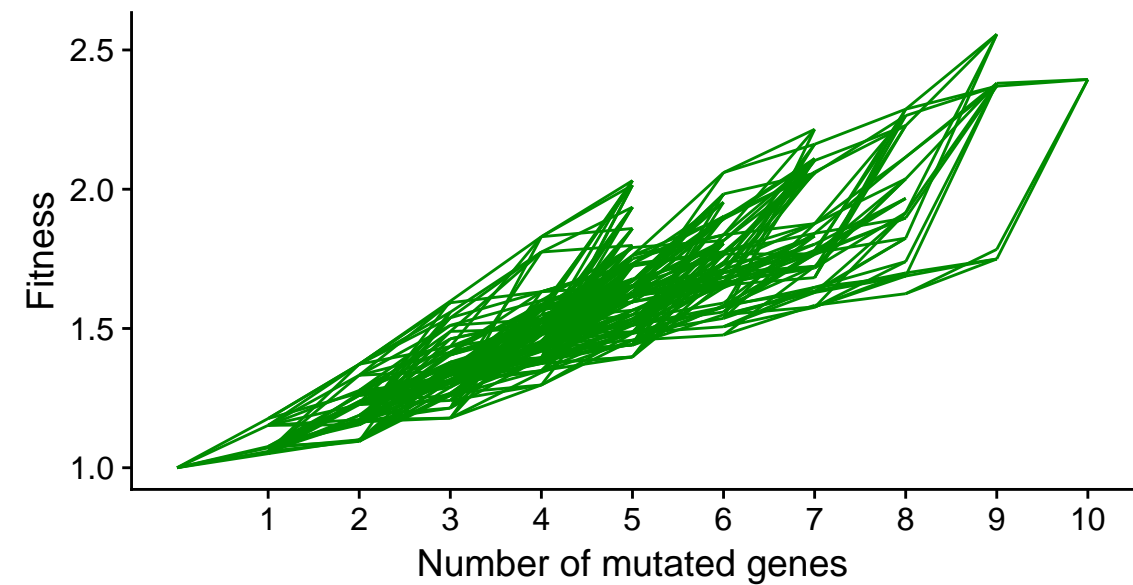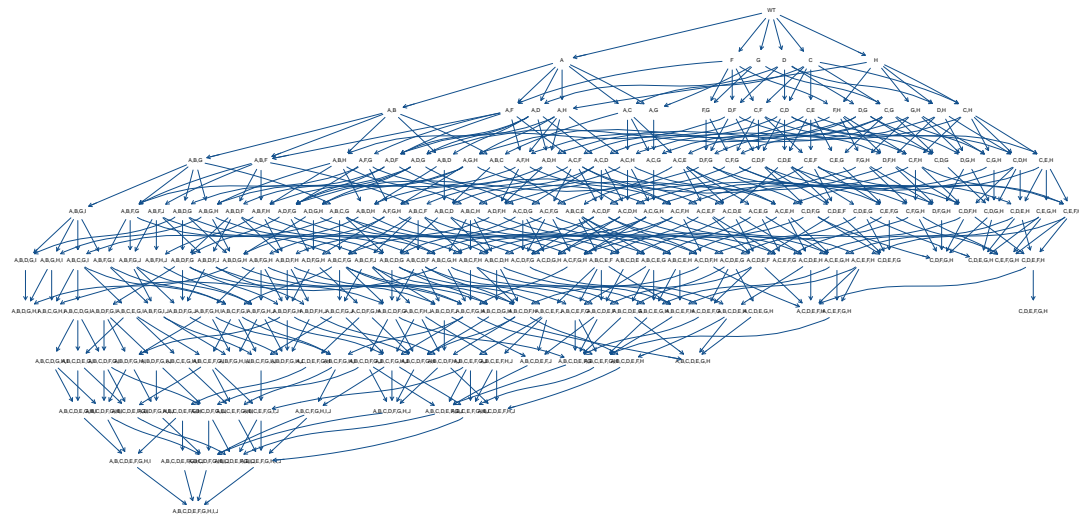

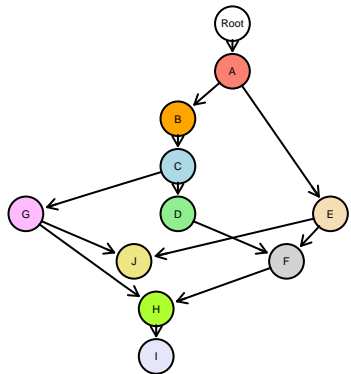

ID 2NKDNCMNshVULJ2E  
 acc genotypes 22  
 peaks no back 2  
 removed edges 3  
 prop rem edges 0.091

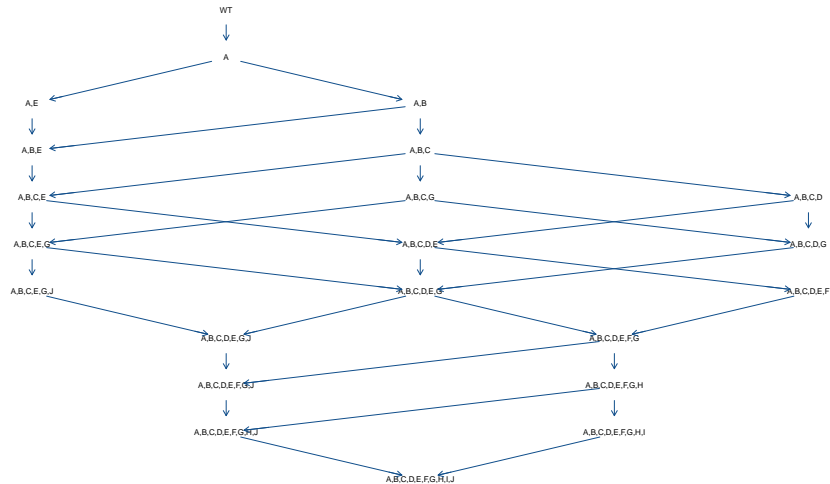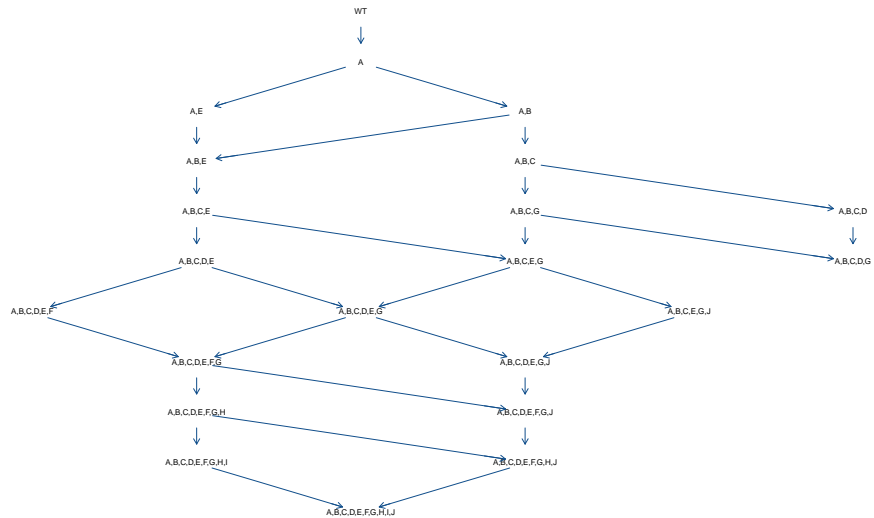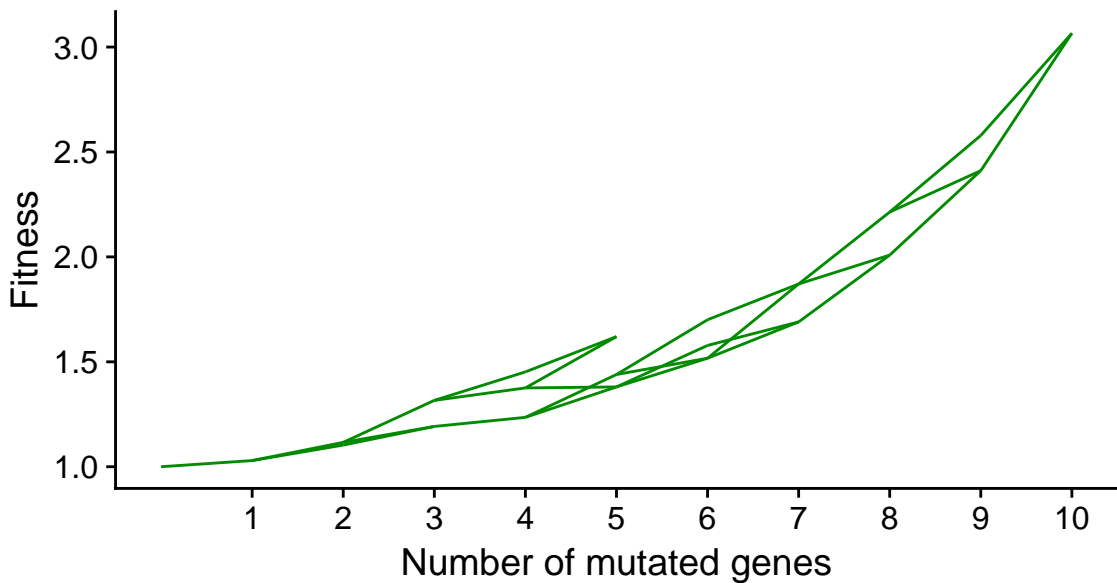

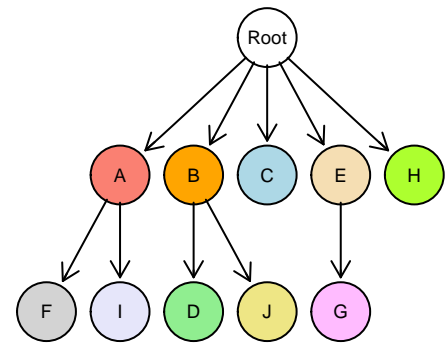

ID 2ti105XmgduWICPHP  
acc genotypes 300  
peaks no back 24  
removed edges 245  
prop rem edges 0.223

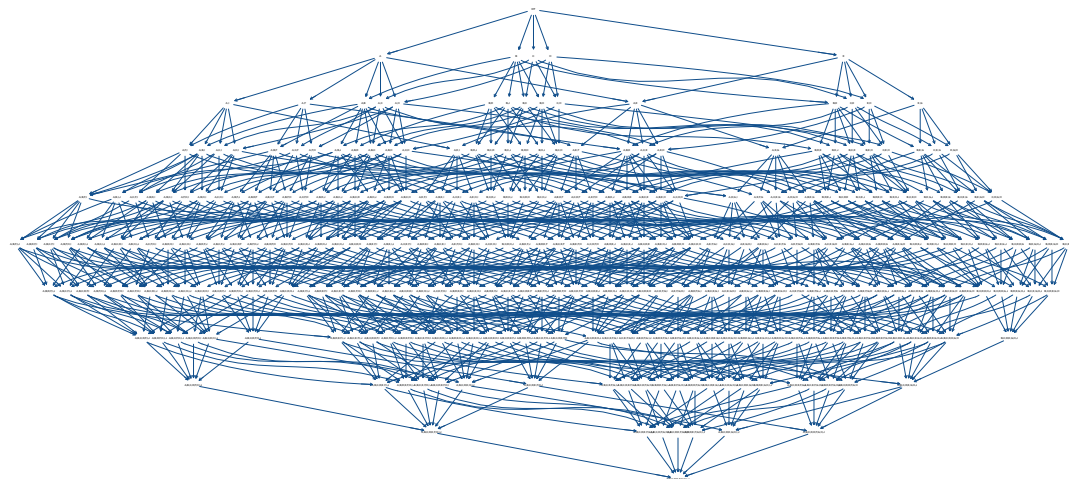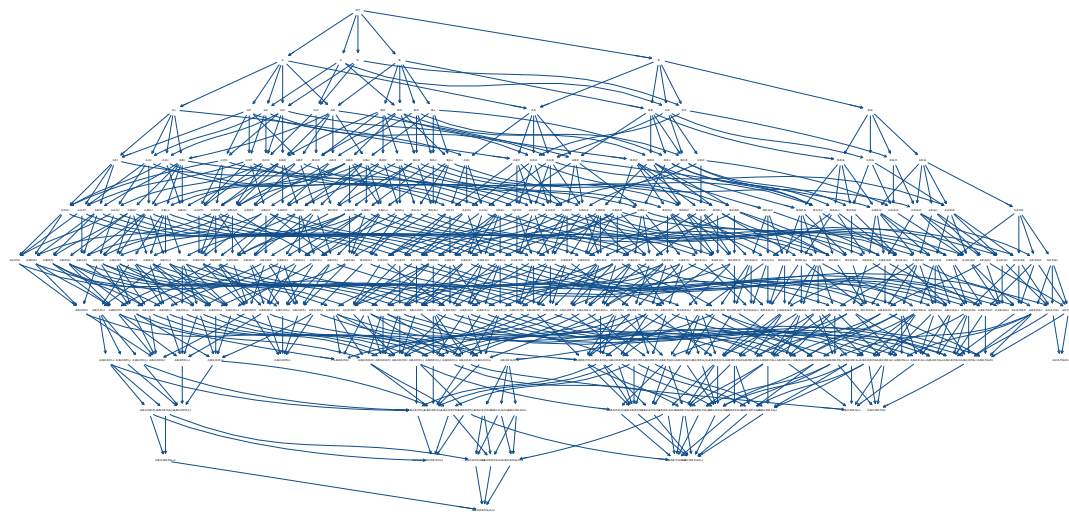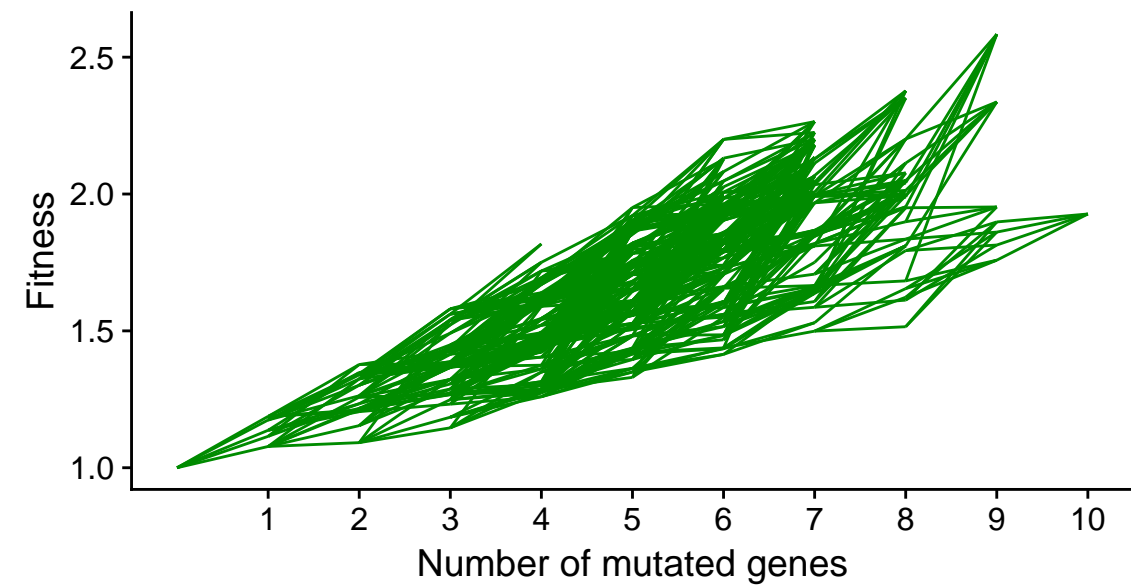

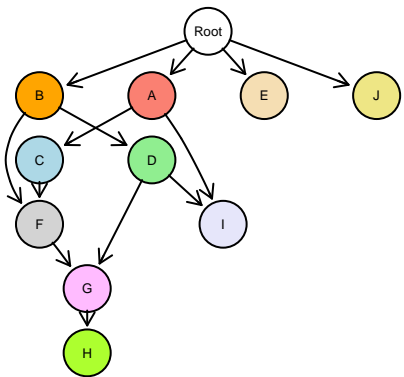

ID 3a7jMzPzBxEpCMra  
 acc genotypes 72  
 peaks no back 11  
 removed edges 42  
 prop rem edges 0.239

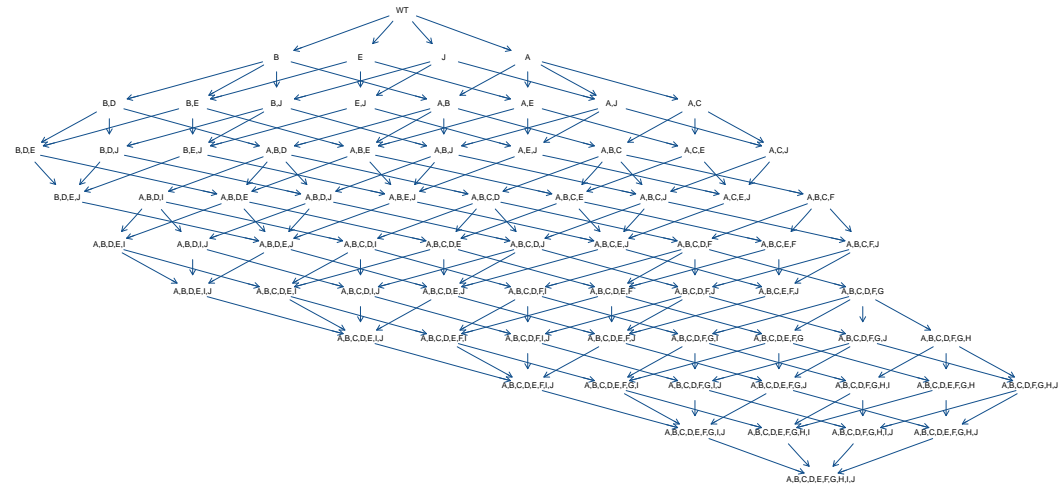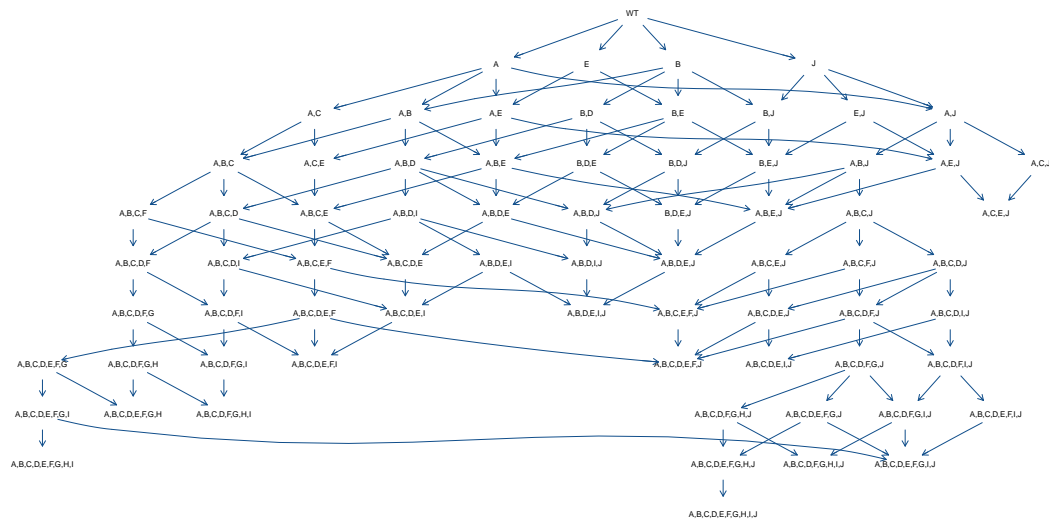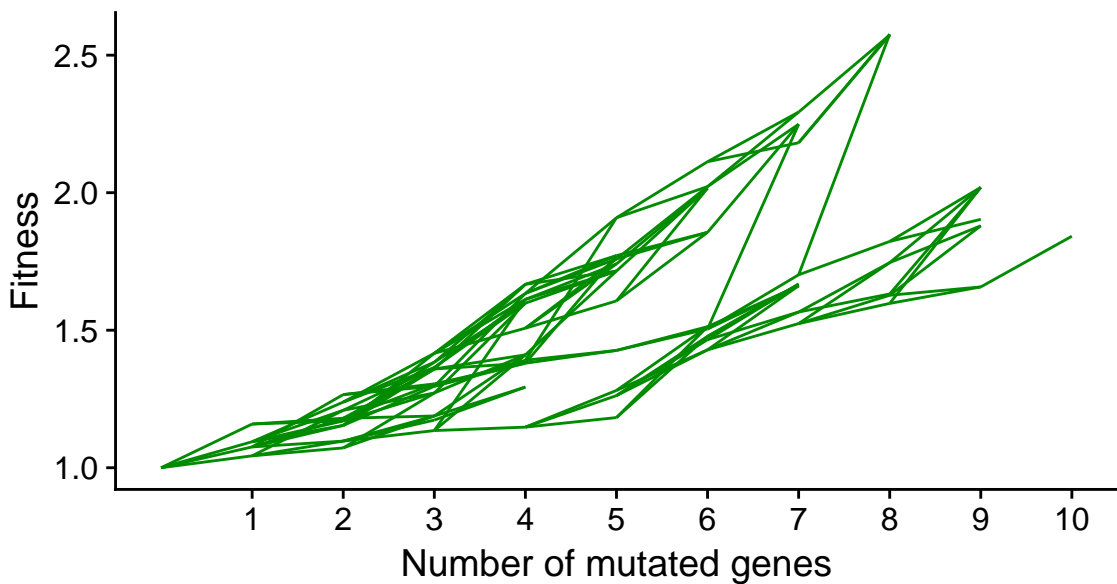

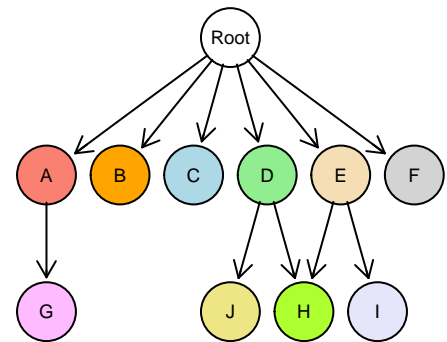

*ID* 46TSoH89nM3Ac4Jd  
*acc genotypes* 312  
*peaks no back* 23  
*removed edges* 210  
*prop rem edges* 0.182

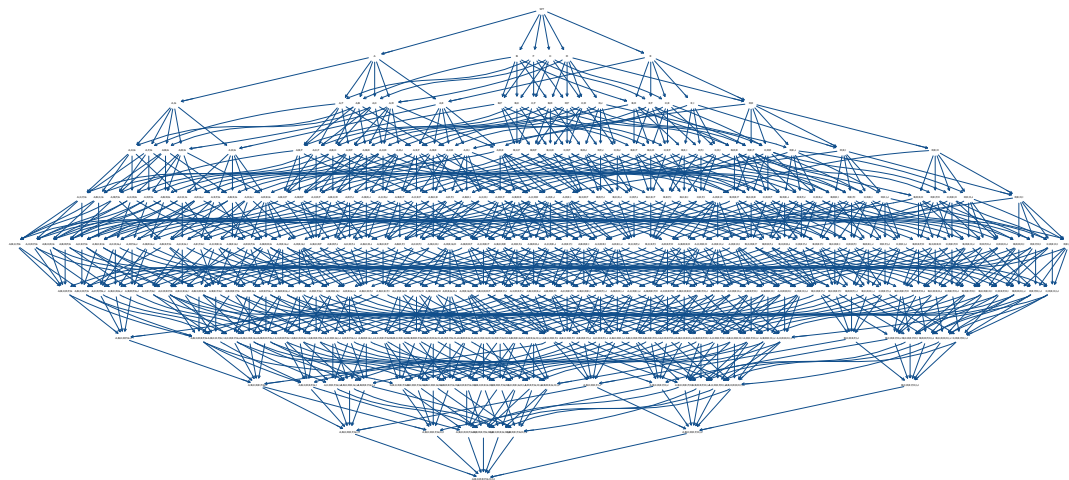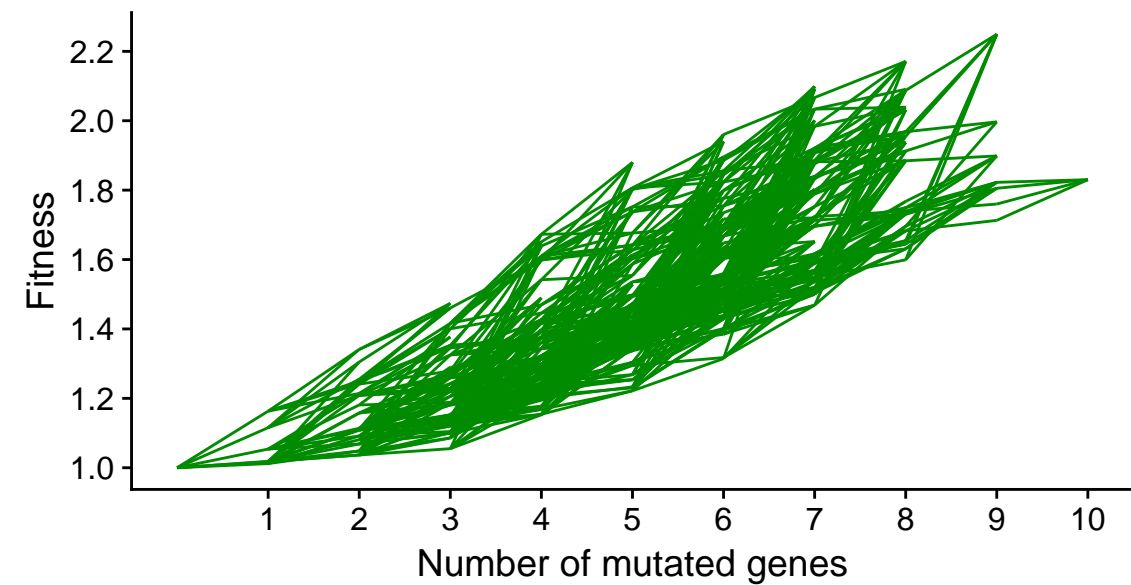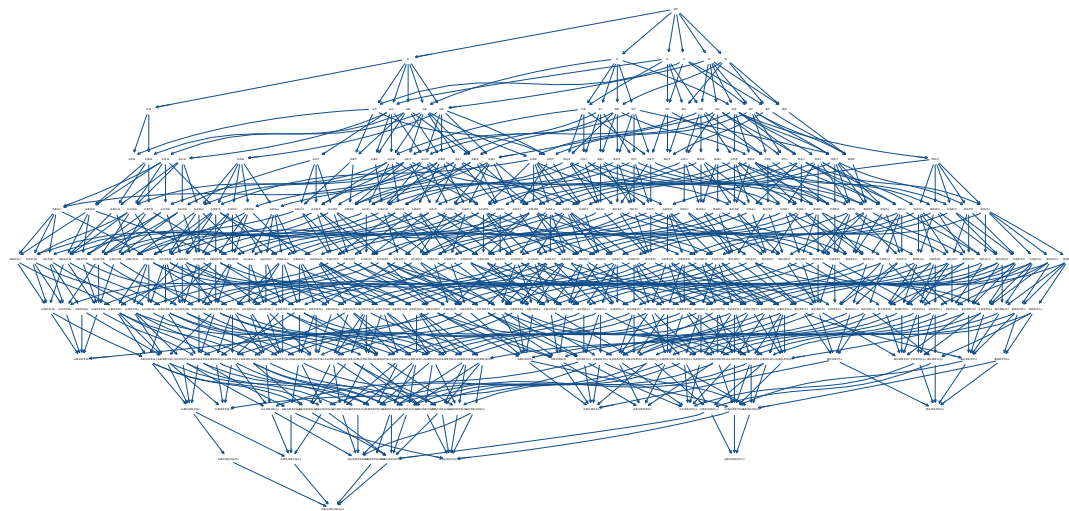

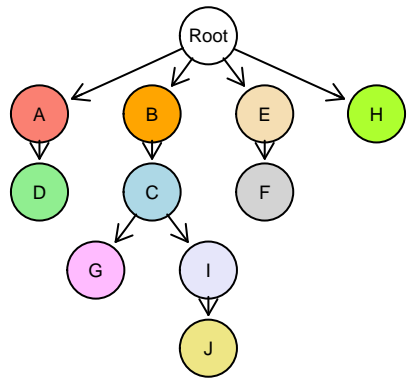

*ID* 4KWL9eg4fUjg1ndt  
*acc genotypes* 144  
*peaks no back* 15  
*removed edges* 97  
*prop rem edges* 0.228

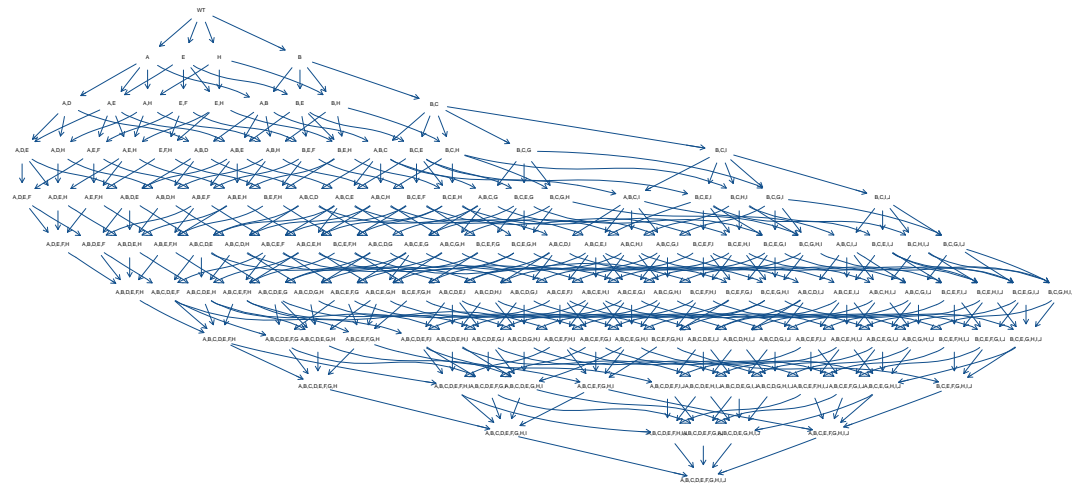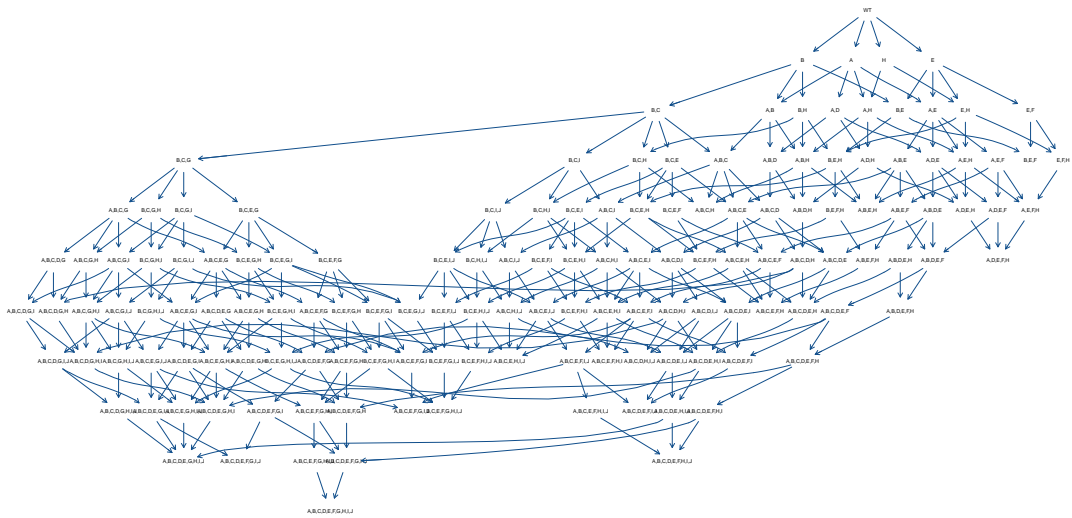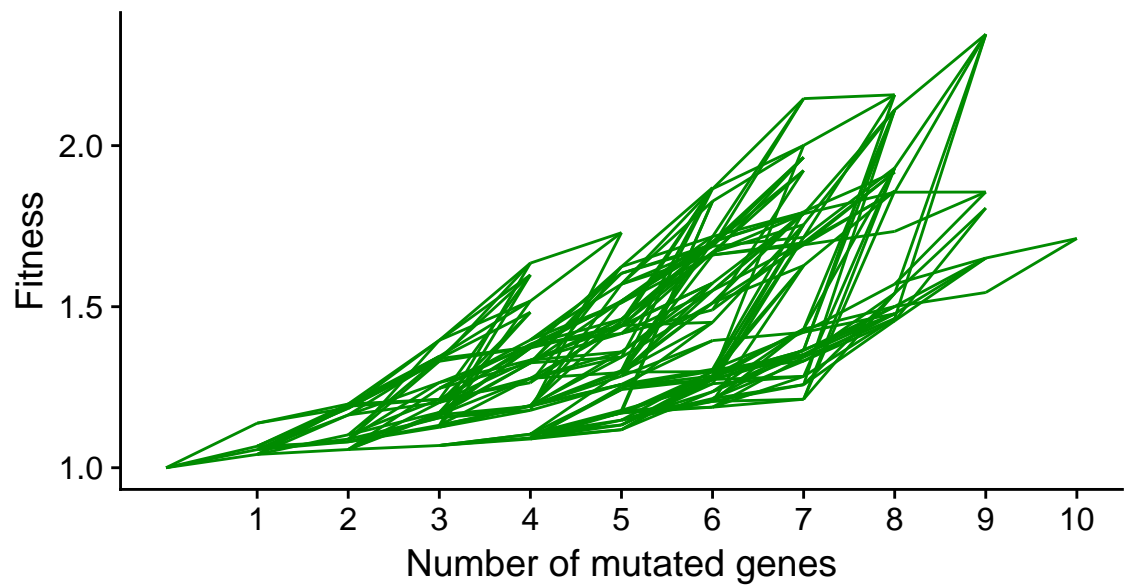

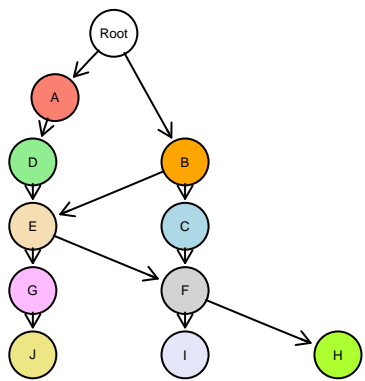

ID 4r7diBoGWUyNOWMY  
 acc genotypes 27  
 peaks no back 5  
 removed edges 6  
 prop rem edges 0.136

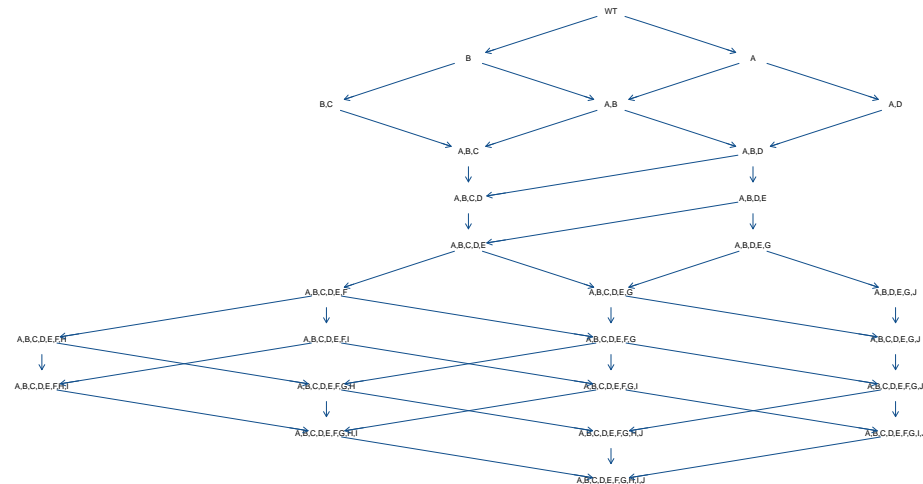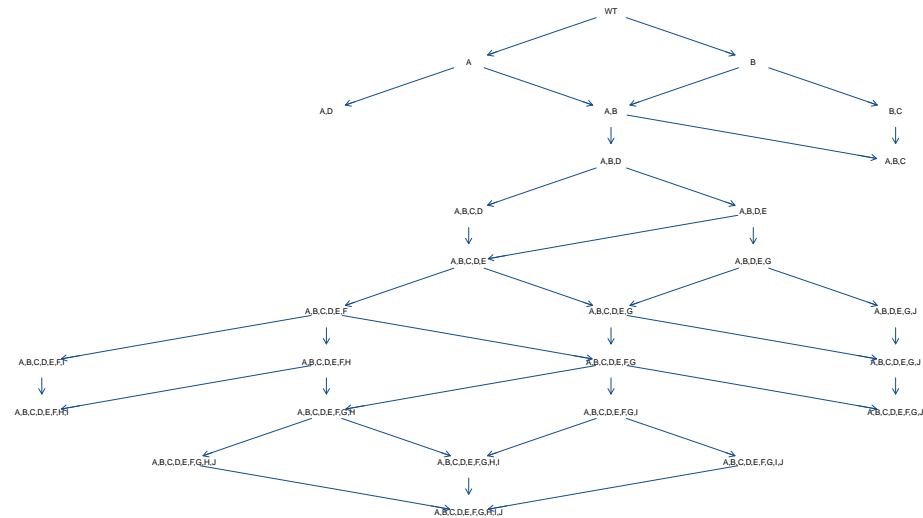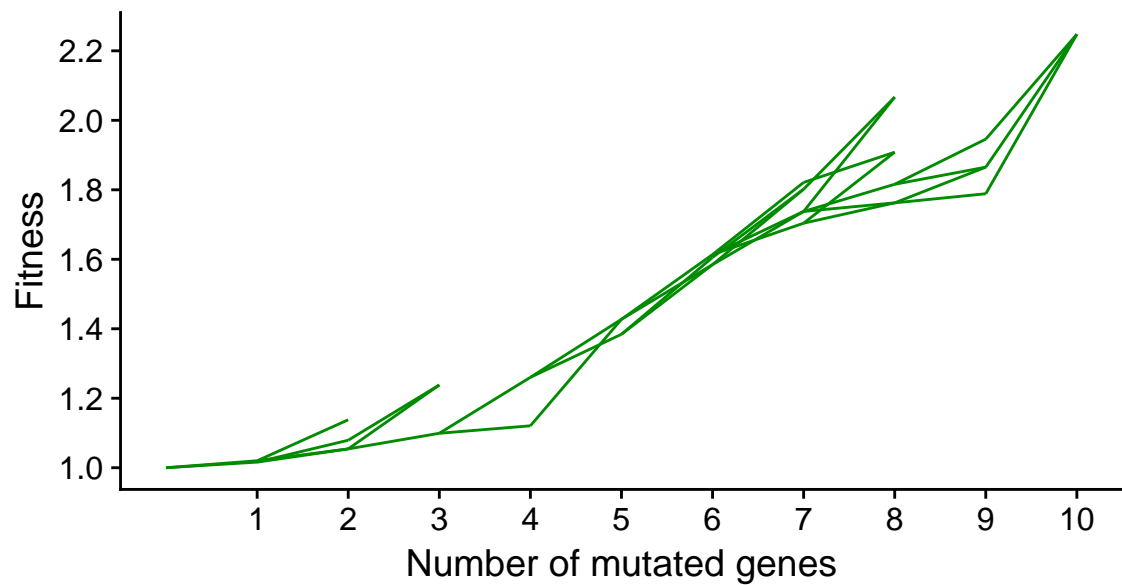



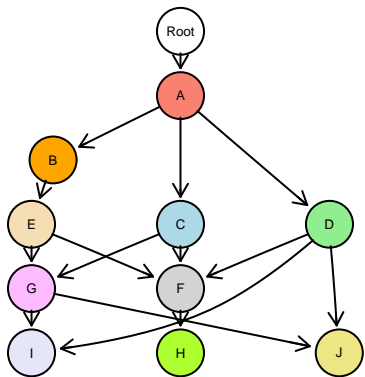

ID **56zMgtzUdnUxiwN9**  
 acc genotypes **28**  
 peaks no back **6**  
 removed edges **8**  
 prop rem edges **0.167**

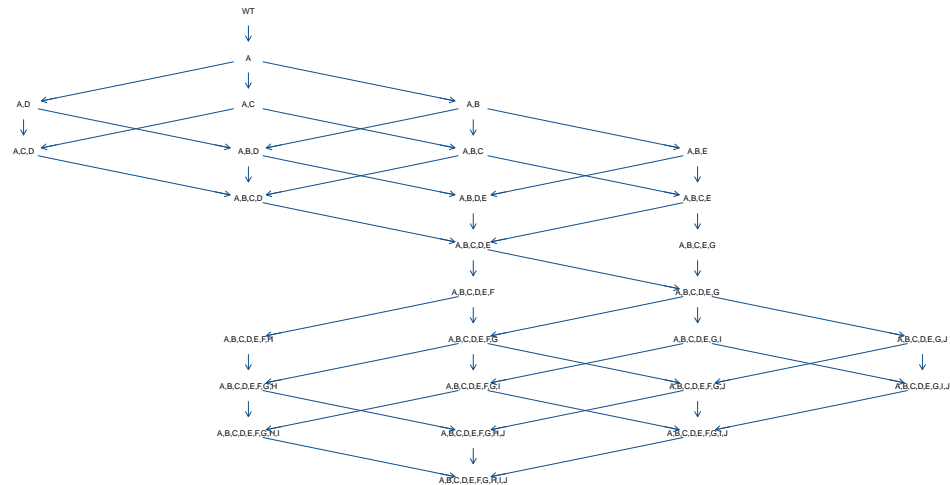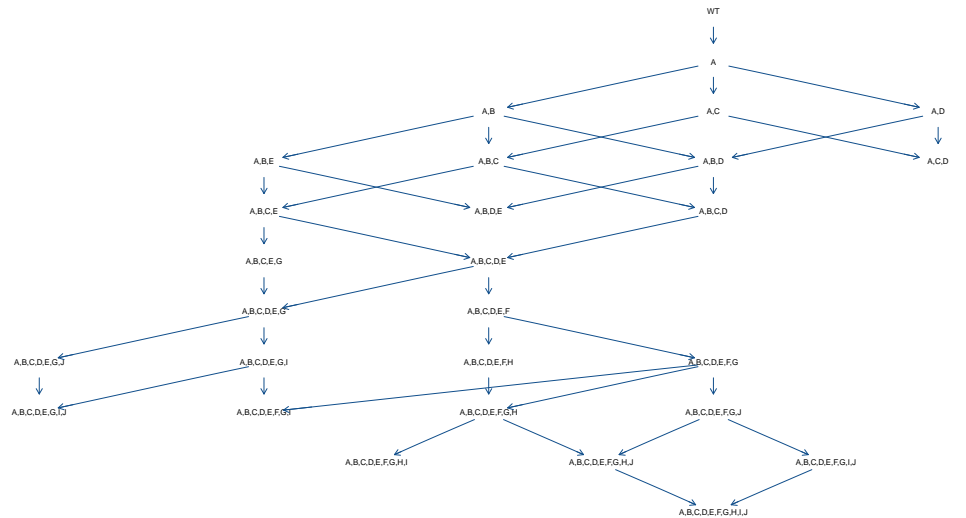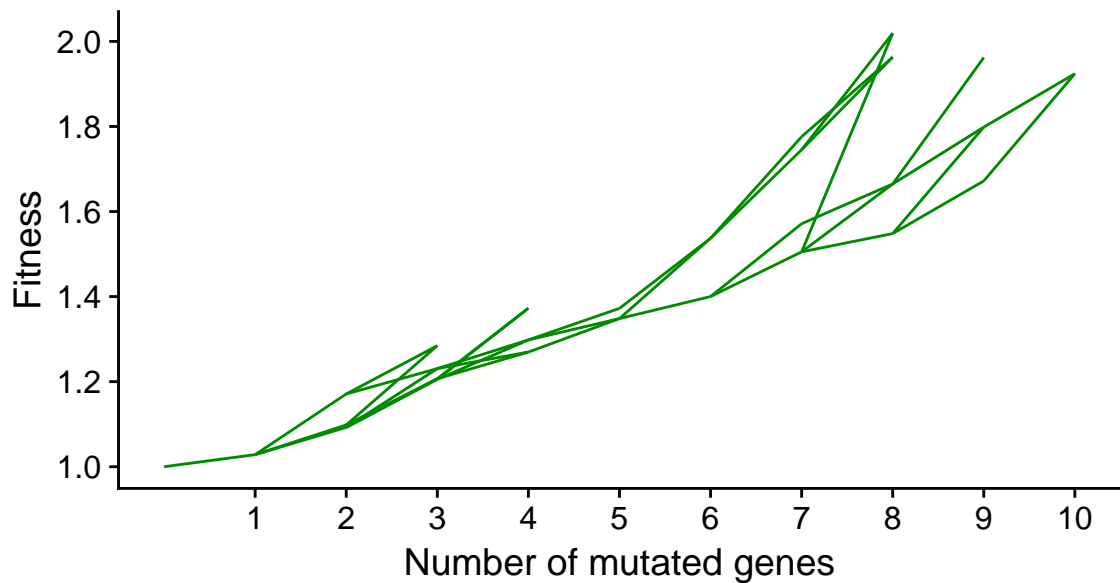

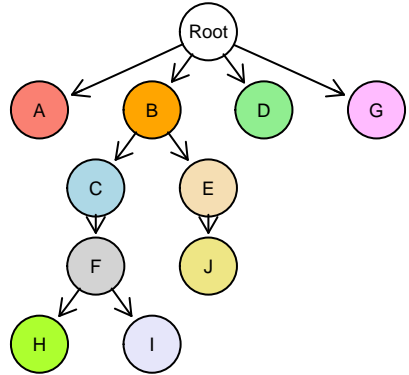

ID **5D4EKkcfVoj4fHS**  
 acc genotypes **152**  
 peaks no back **14**  
 removed edges **94**  
 prop rem edges **0.197**

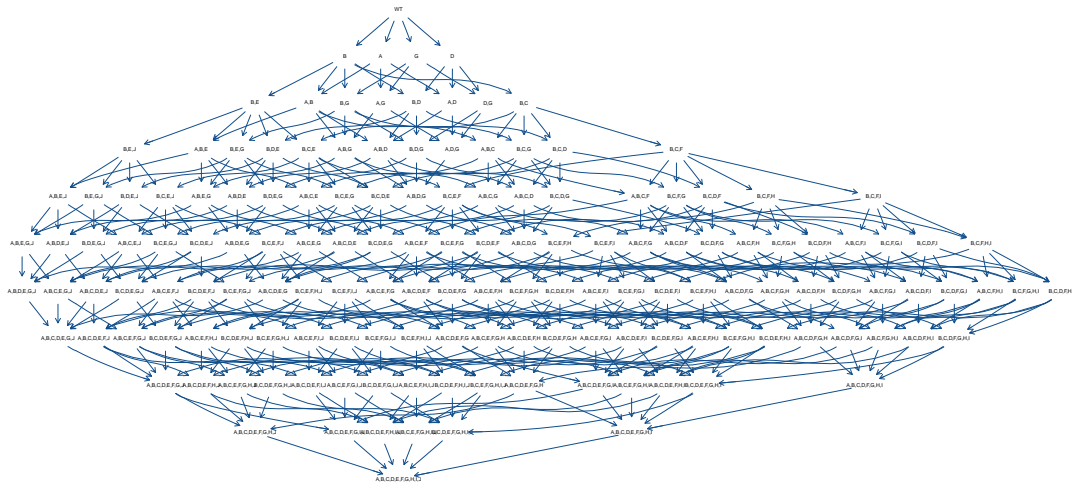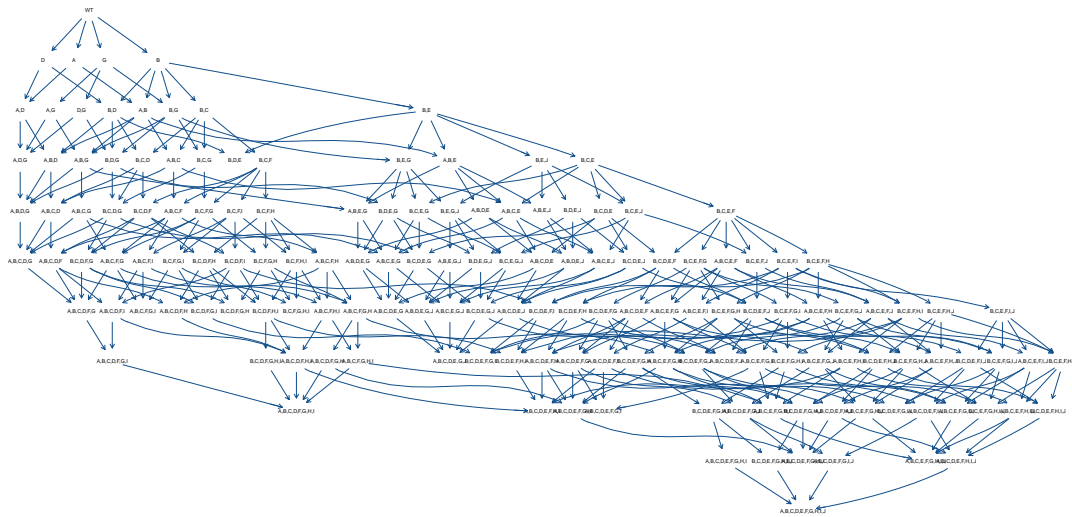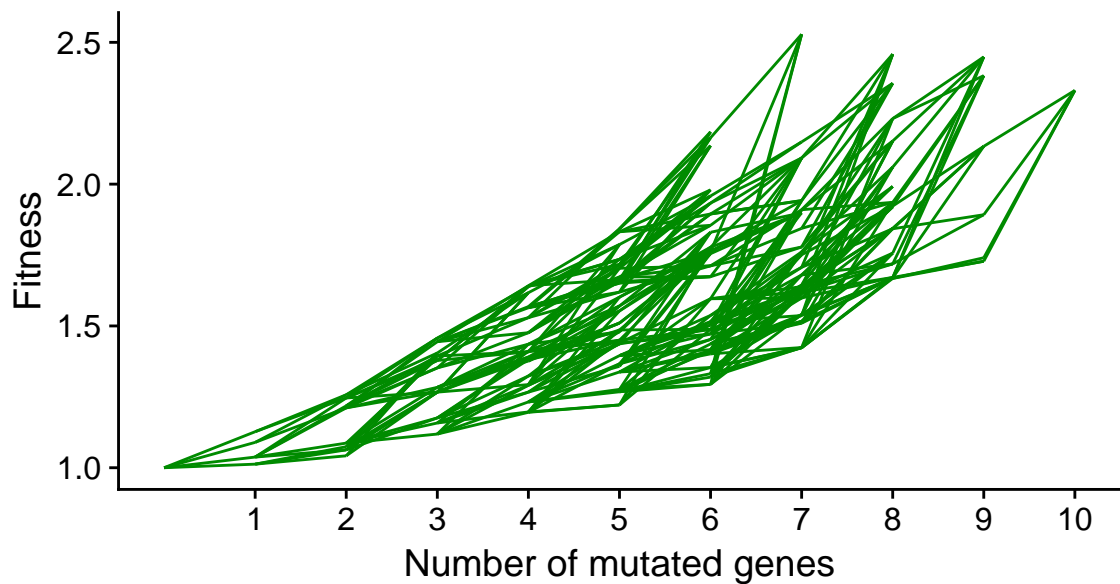

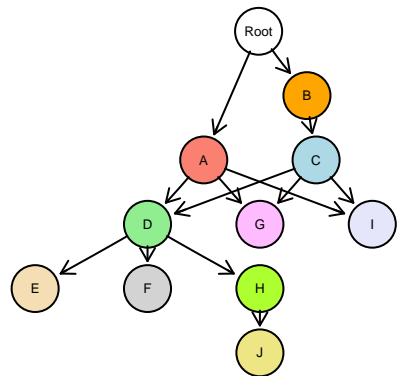

ID 5DSInm8xyZVZ5wT9  
 acc genotypes 57  
 peaks no back 8  
 removed edges 20  
 prop rem edges 0.14

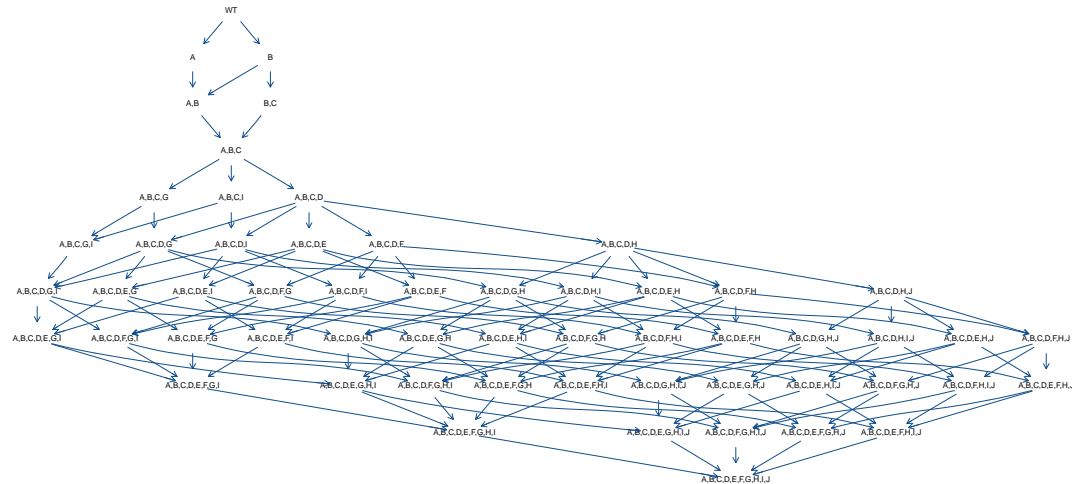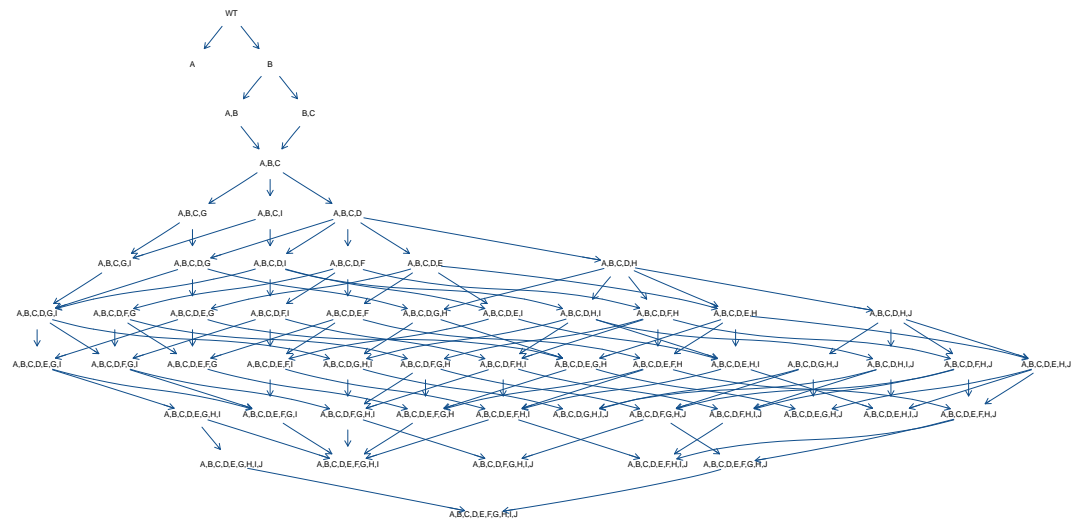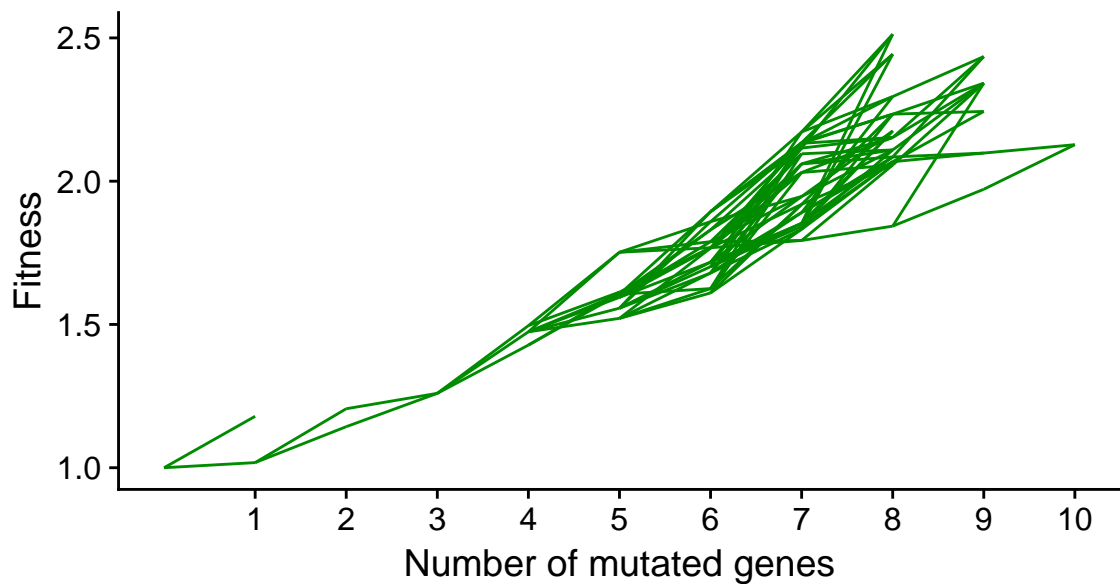

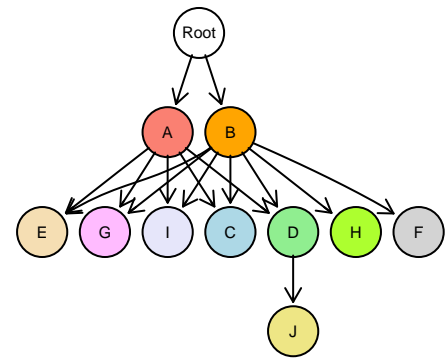

*ID* 5ervwavRLQyVUmM4  
*acc genotypes* 198  
*peaks no back* 19  
*removed edges* 124  
*prop rem edges* 0.173

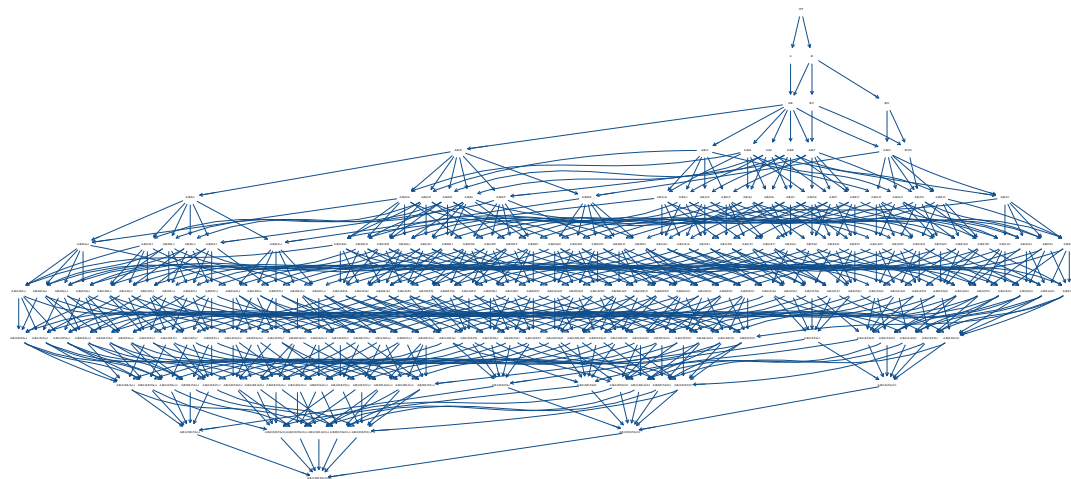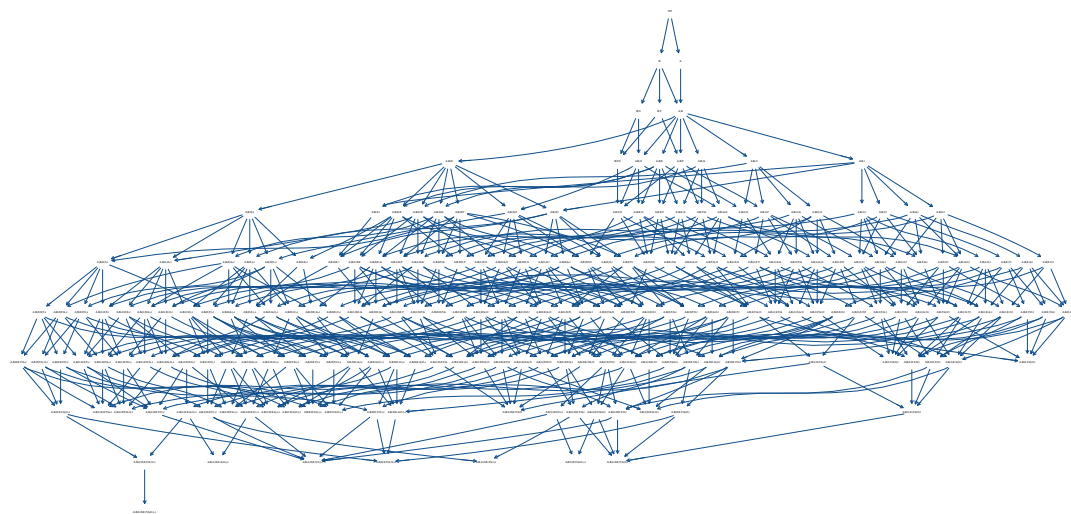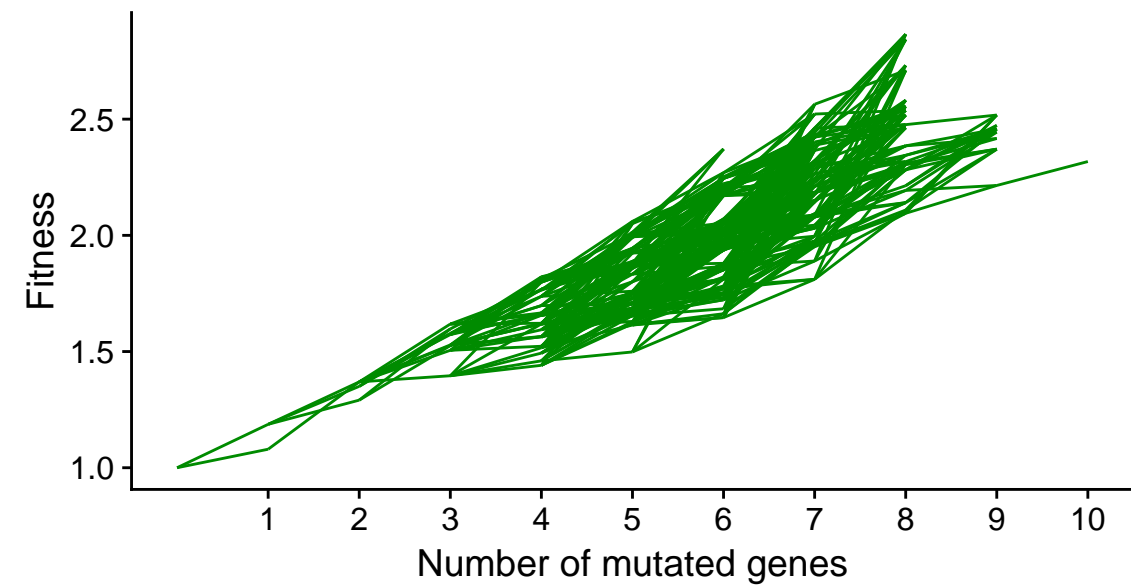

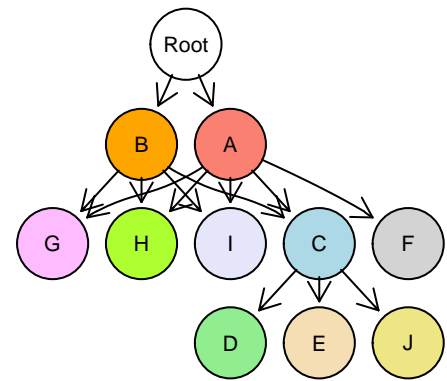

ID 5Kk3ENaa6v1KQQvo  
 acc genotypes 148  
 peaks no back 18  
 removed edges 100  
 prop rem edges 0.199

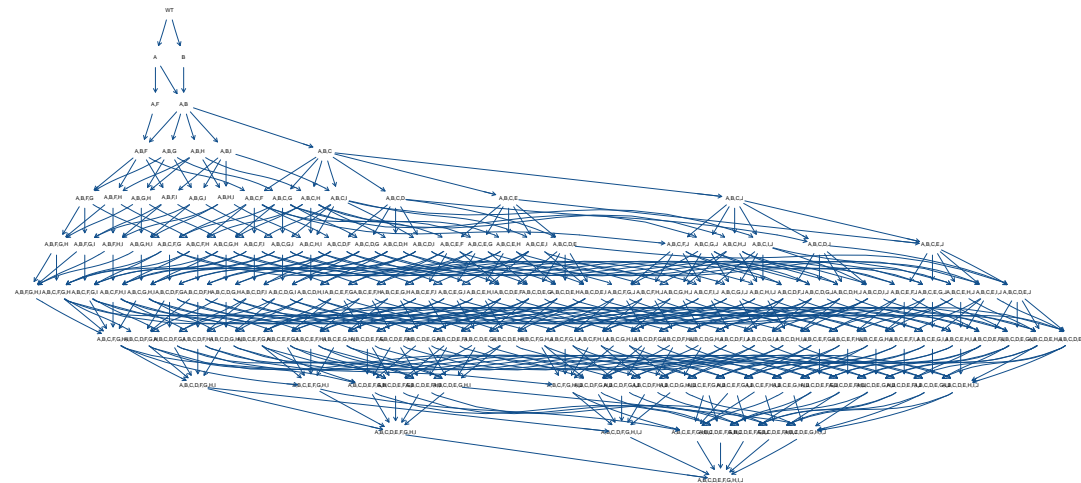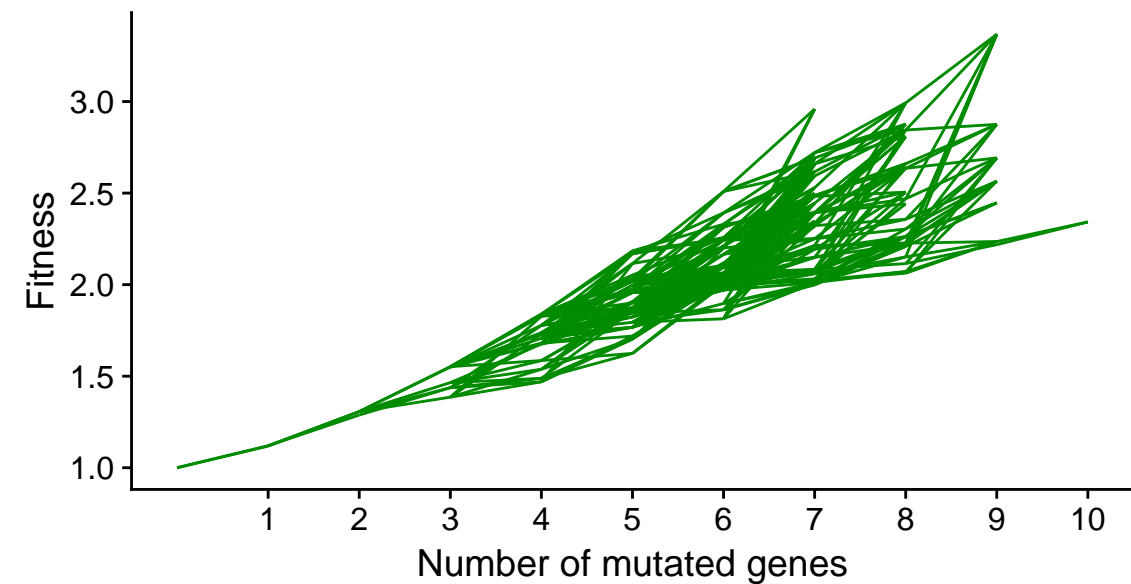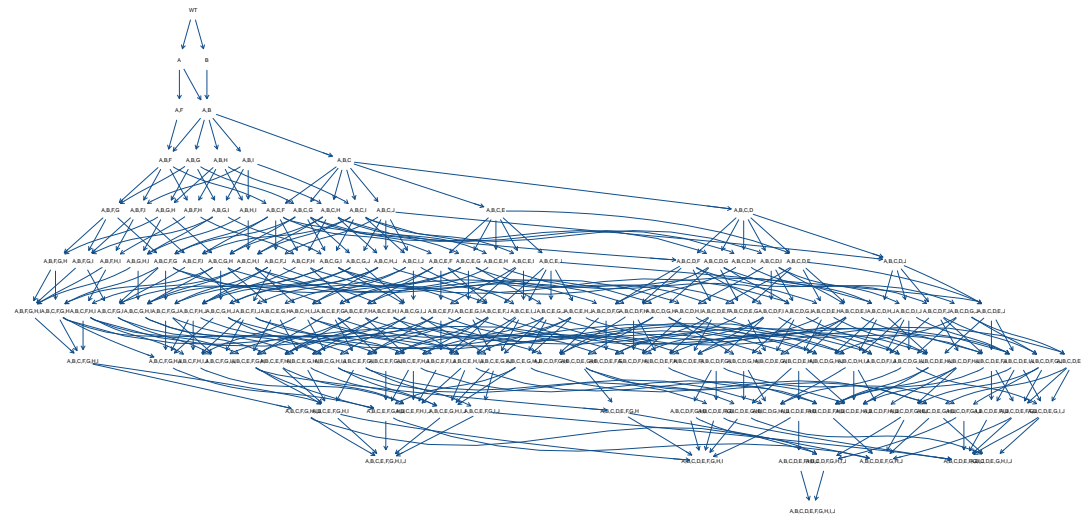

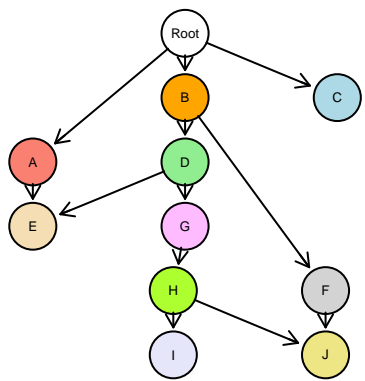

*ID* 5MCNYearEvdy7pit  
*acc genotypes* 72  
*peaks no back* 8  
*removed edges* 33  
*prop rem edges* 0.188

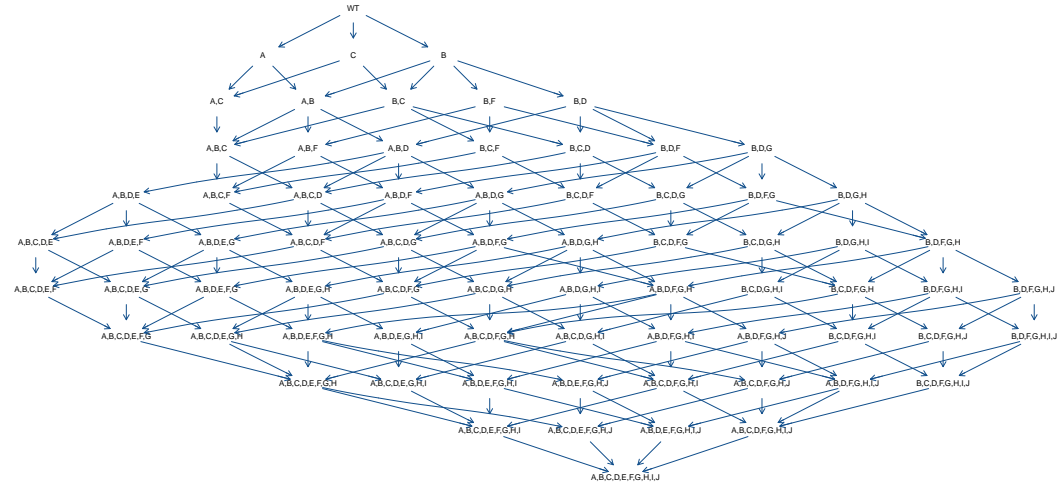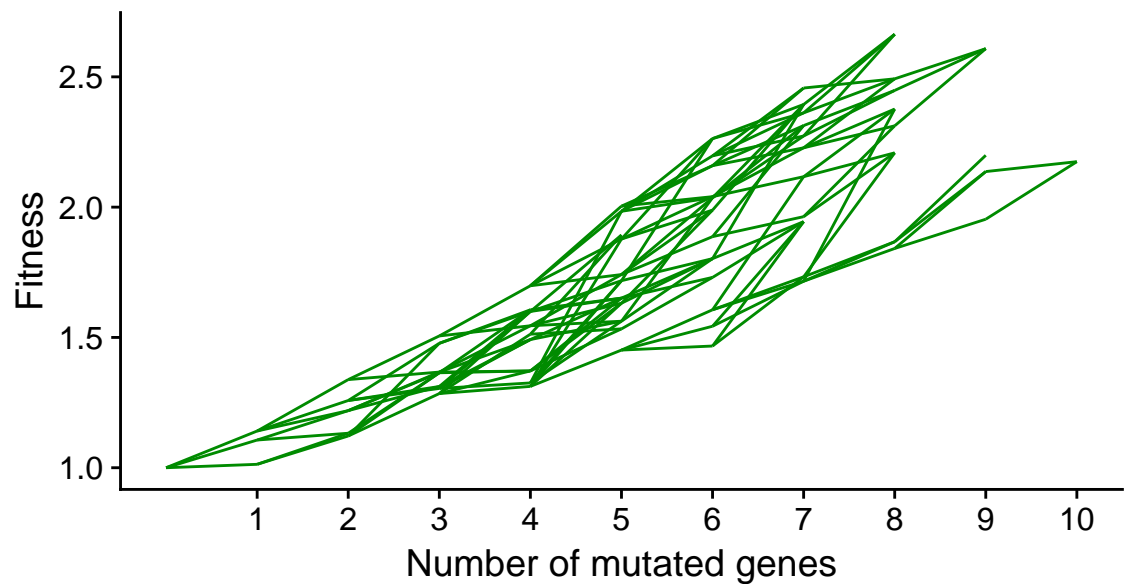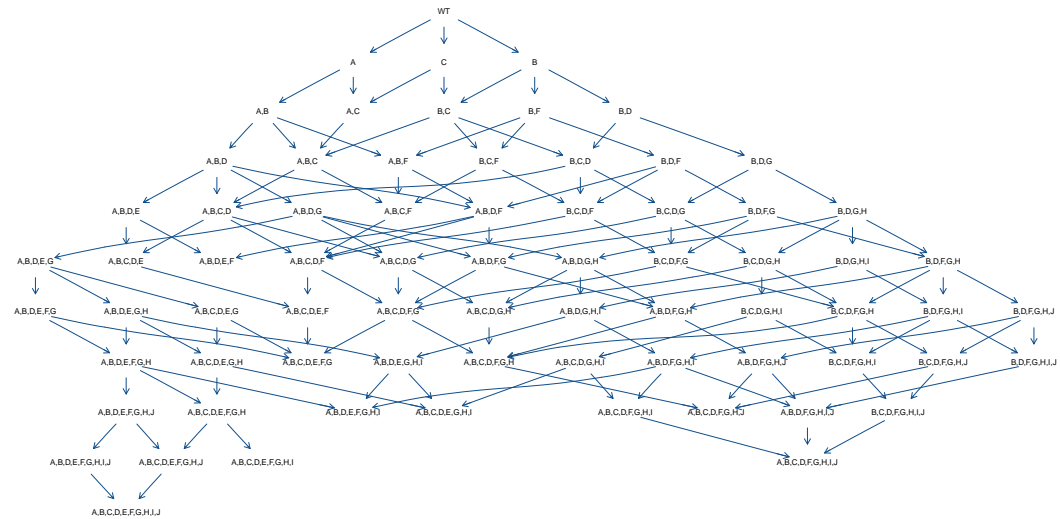

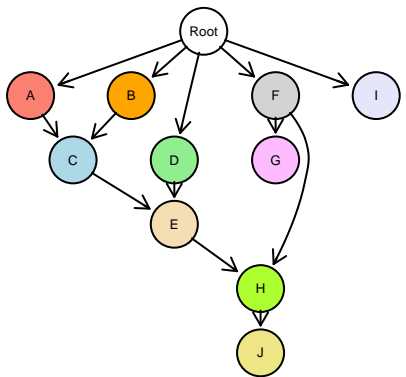

*ID* 5MxLARdmCMPqgUDW  
*acc genotypes* 74  
*peaks no back* 9  
*removed edges* 35  
*prop rem edges* 0.185

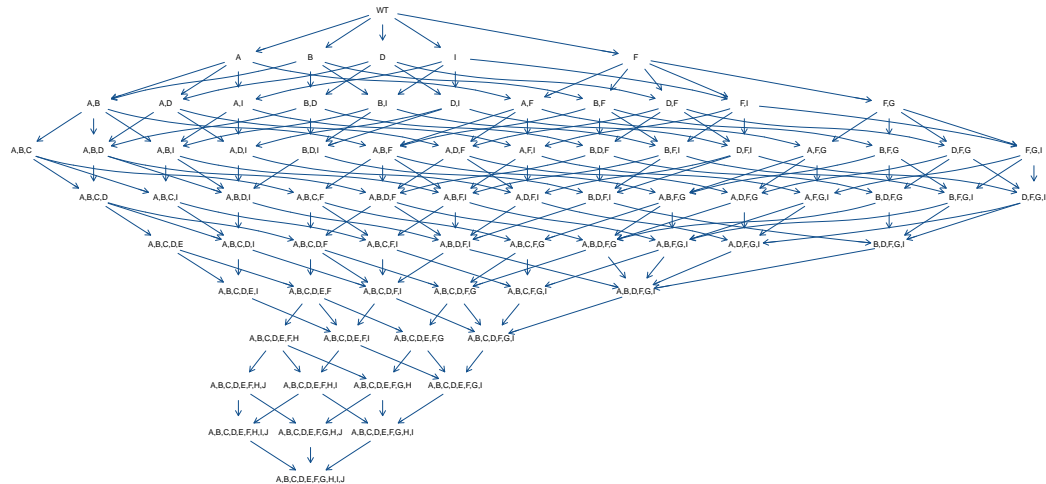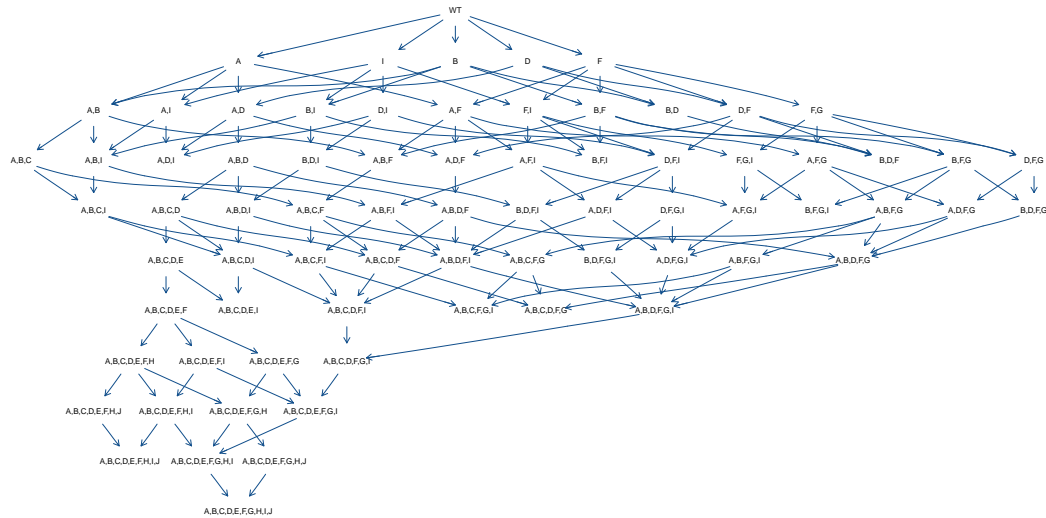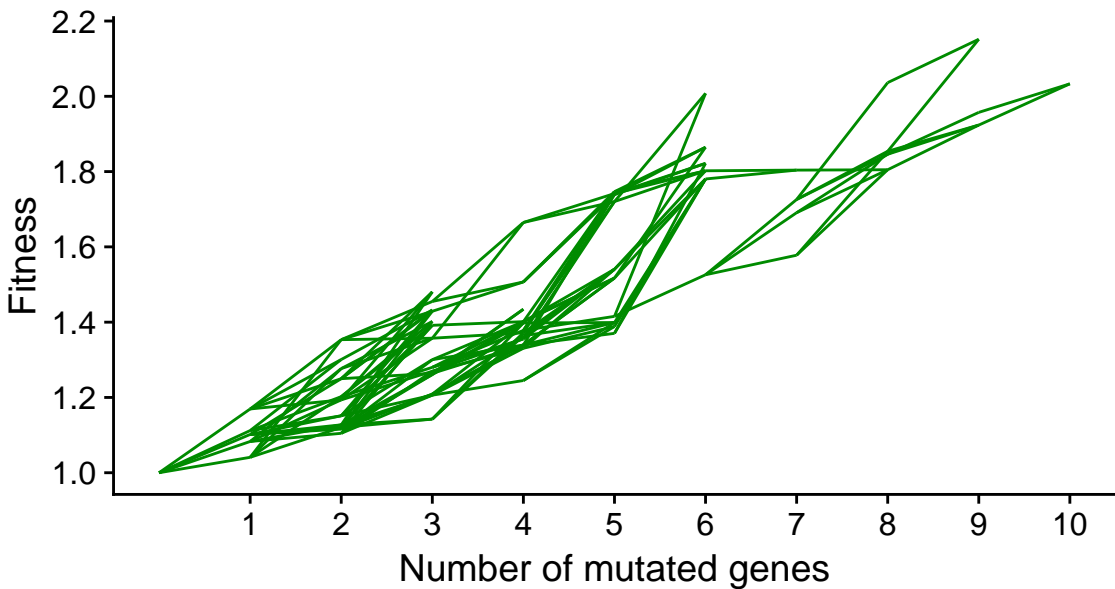

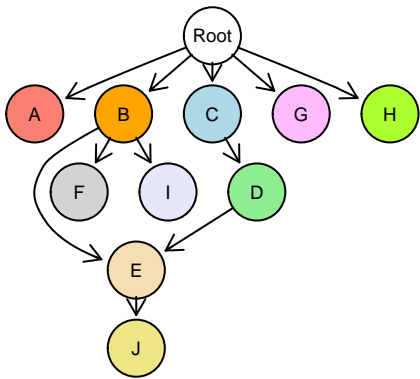

*ID* 5URt4ktIFolpEsp3  
*acc genotypes* 184  
*peaks no back* 19  
*removed edges* 120  
*prop rem edges* 0.199

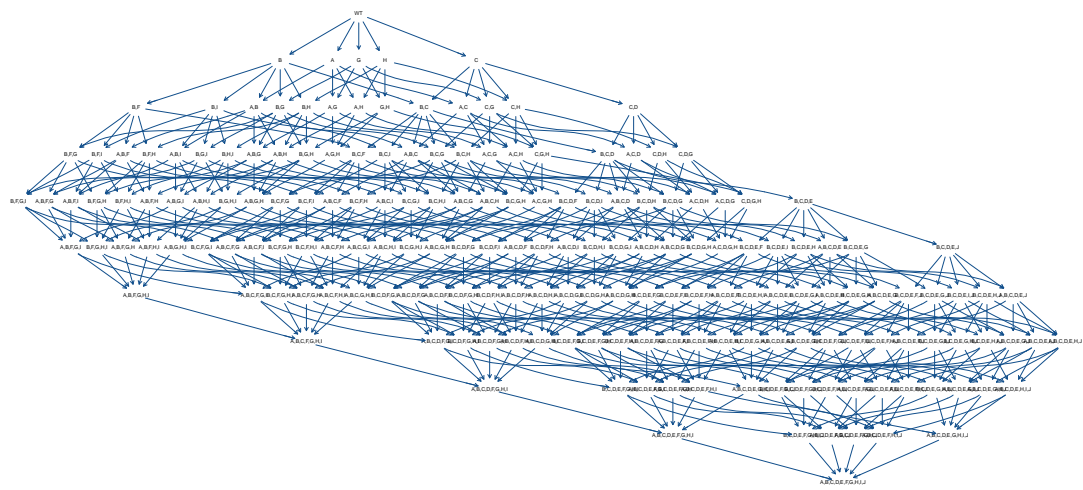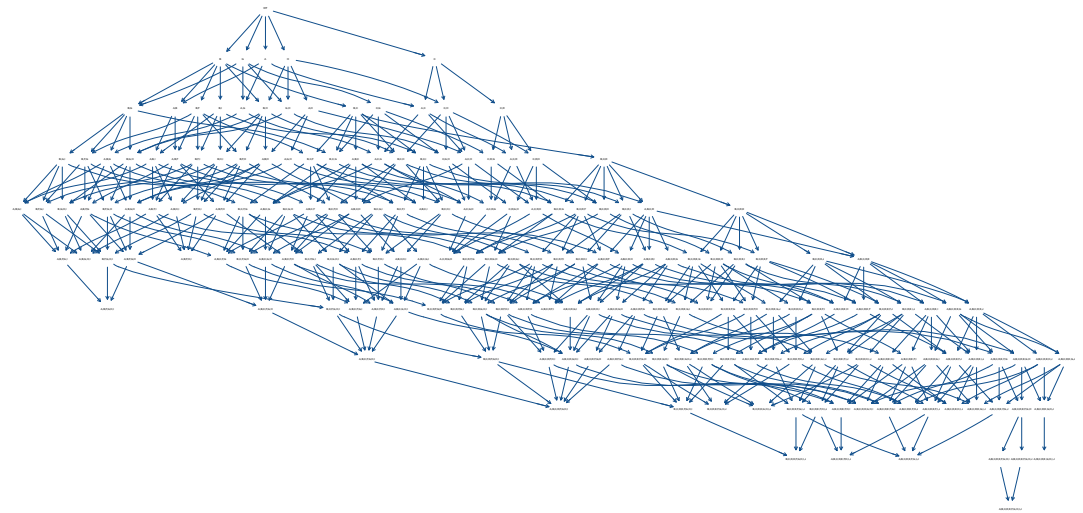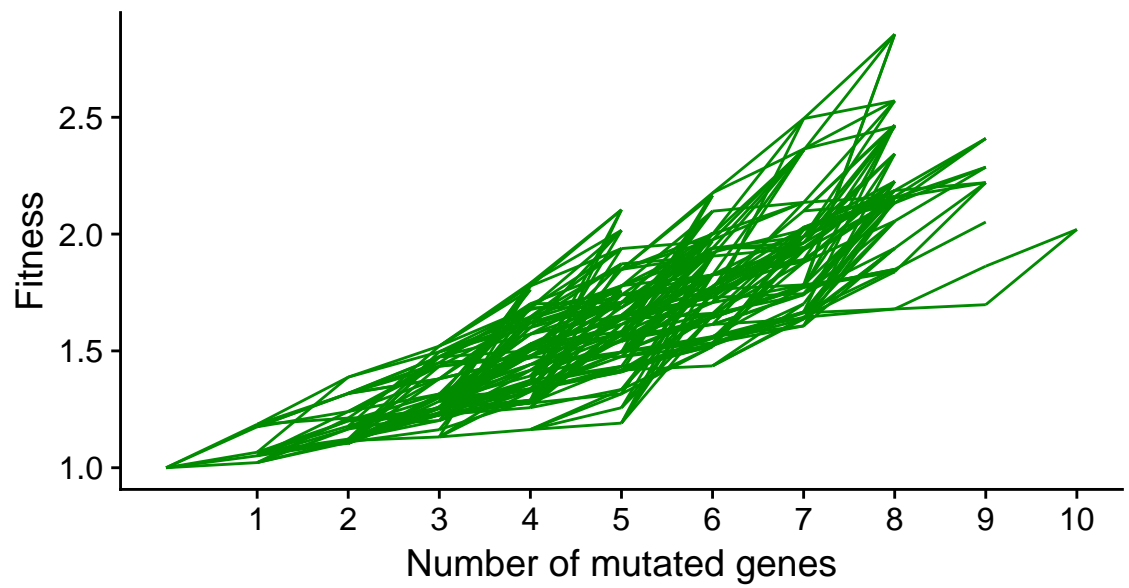



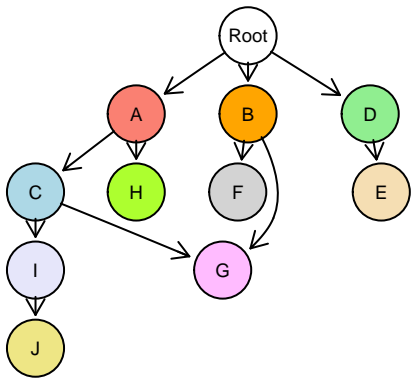

*ID* 64xXOCLCH1gftB10v  
*acc genotypes* 117  
*peaks no back* 12  
*removed edges* 78  
*prop rem edges* 0.239

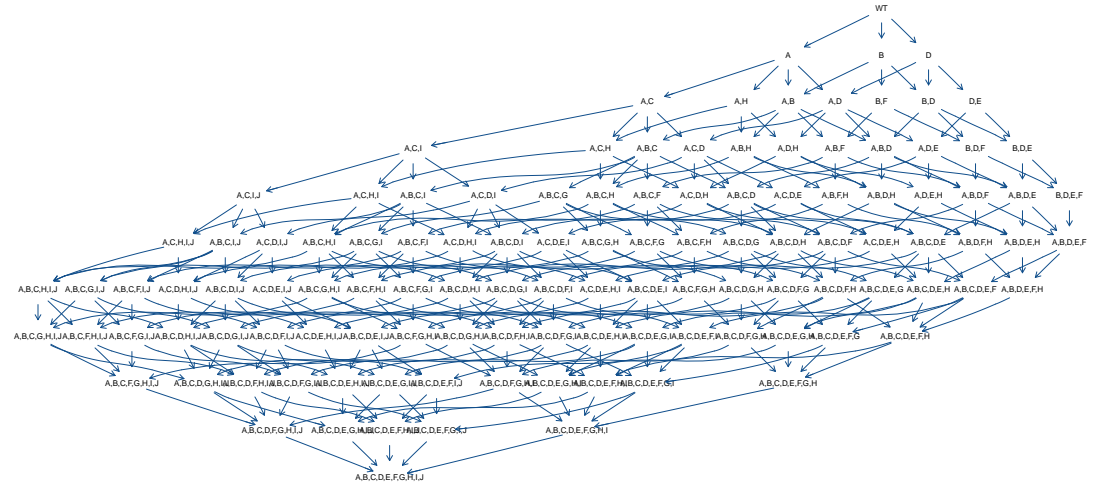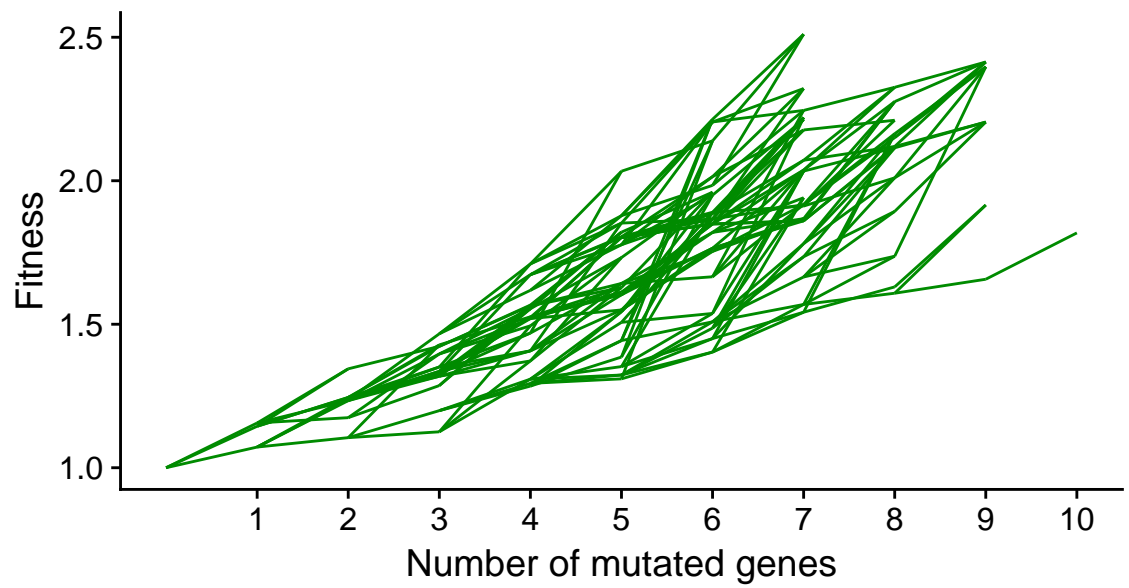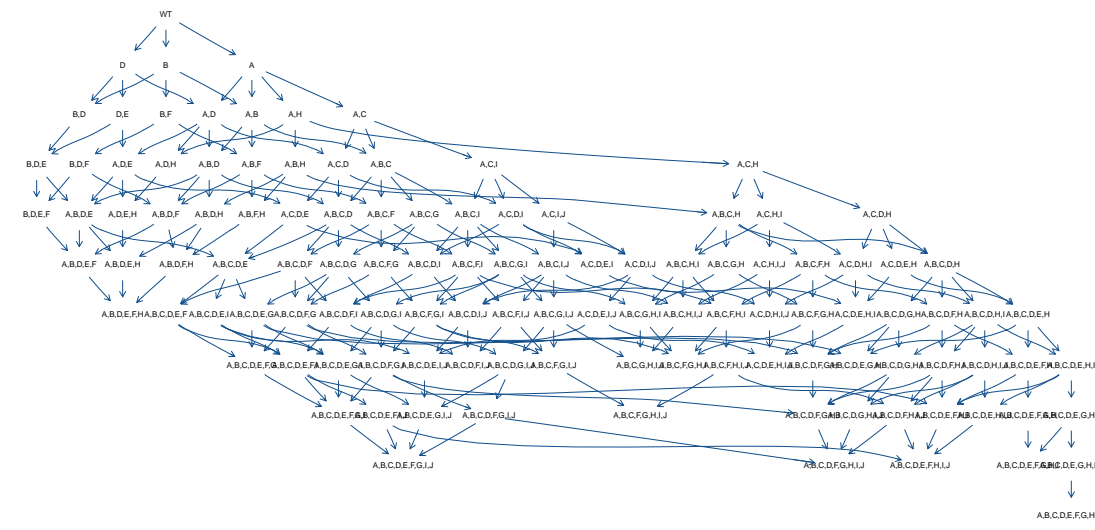

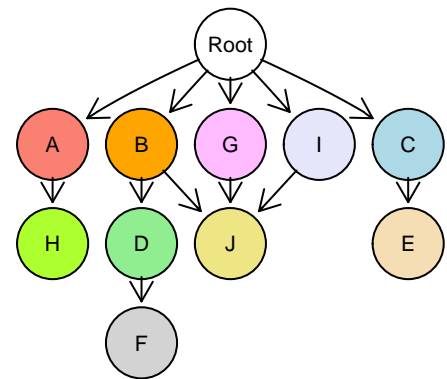

*ID* 69GLOdUeTxOq6MVW  
*acc genotypes* 171  
*peaks no back* 13  
*removed edges* 102  
*prop rem edges* 0.194

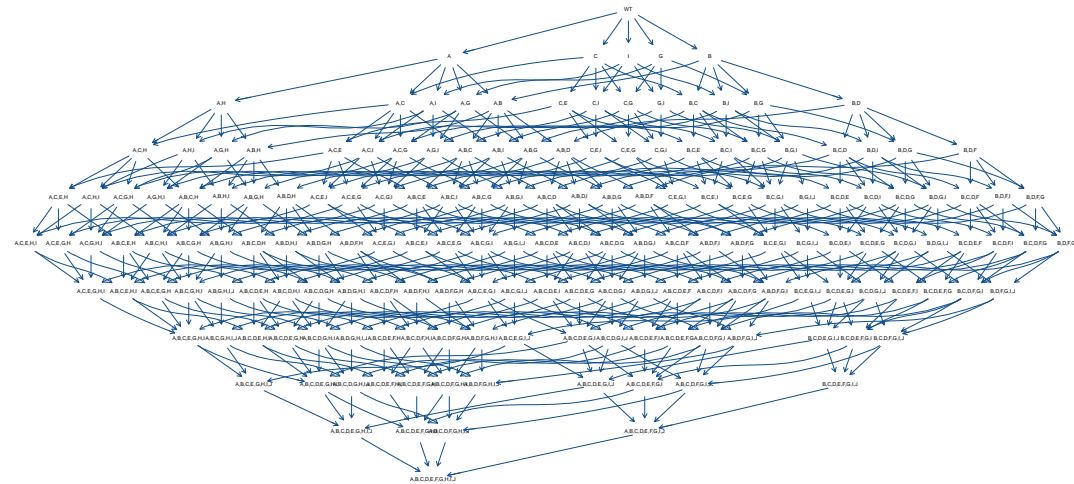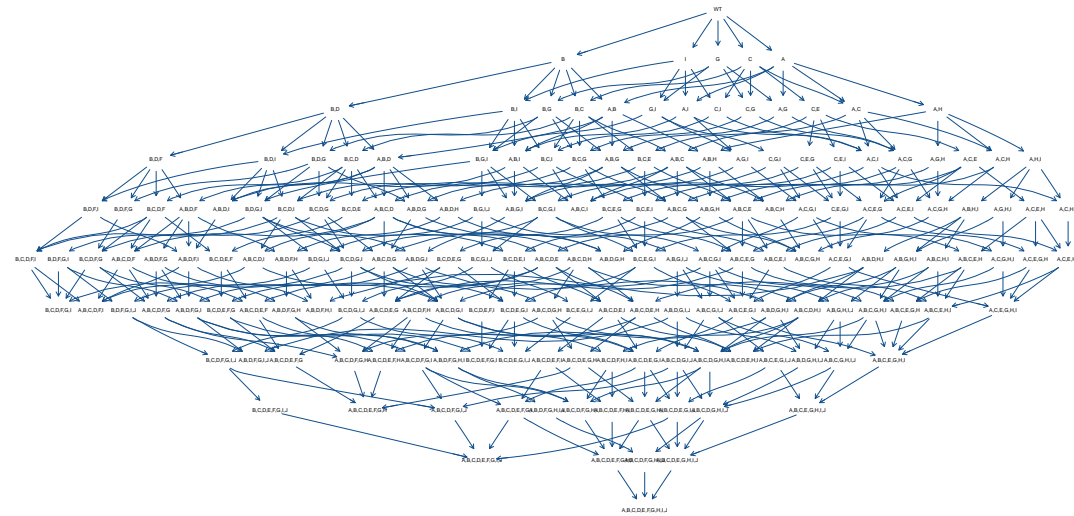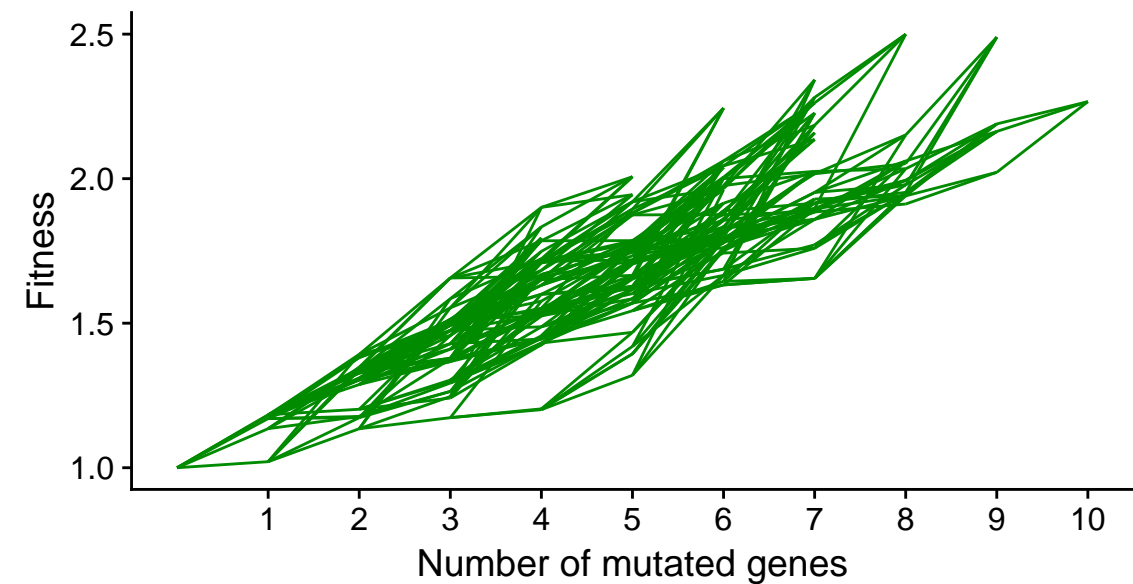

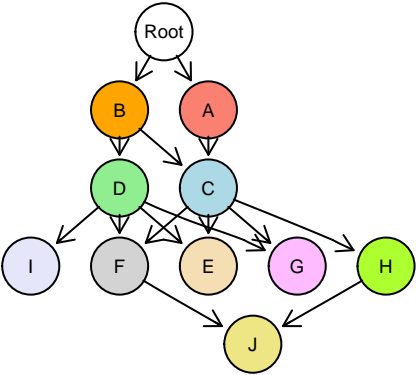

ID 6dNxcxBCKj6SRe7c  
 acc genotypes 50  
 peaks no back 7  
 removed edges 19  
 prop rem edges 0.164

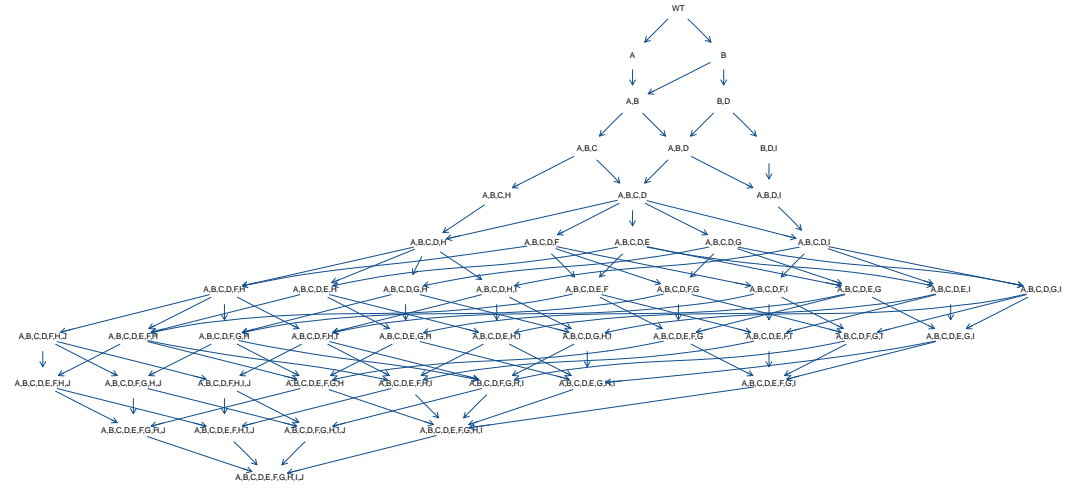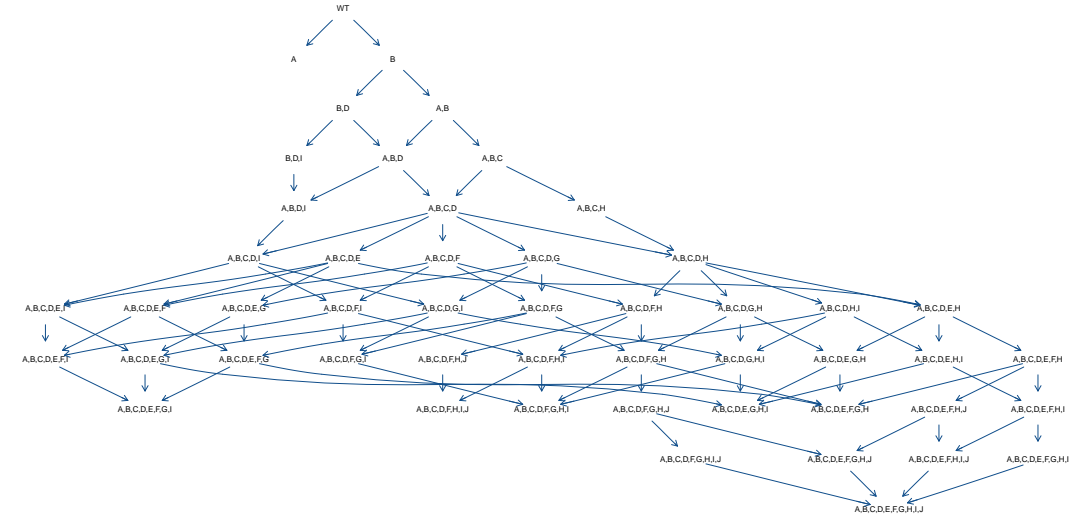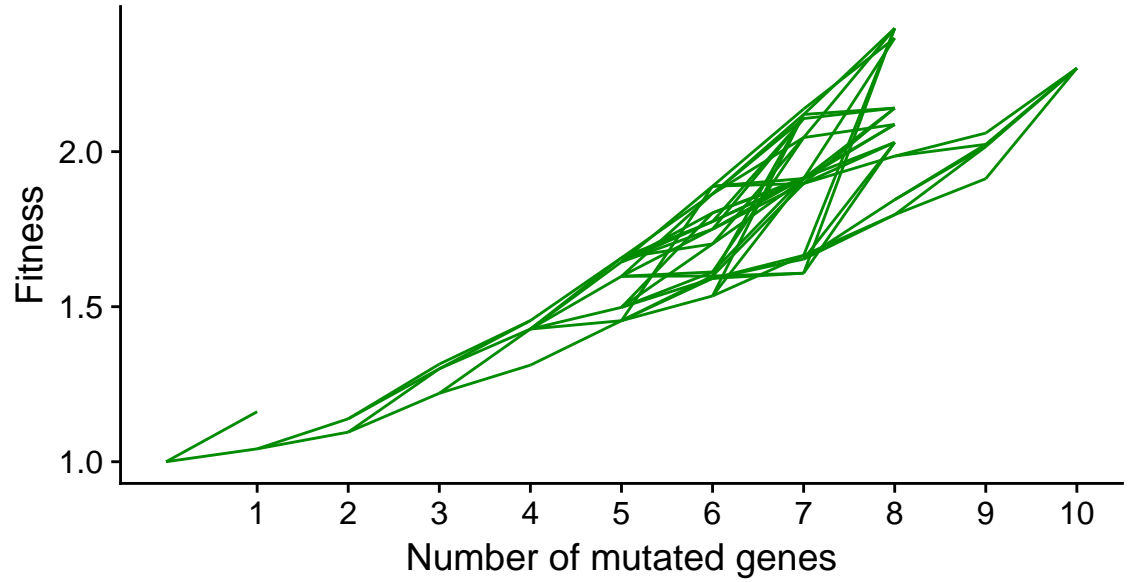

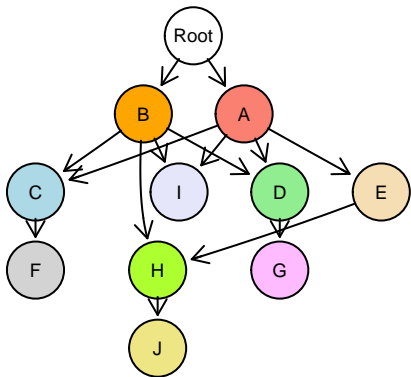

ID 6fale6UPTkVnVhjC  
 acc genotypes 76  
 peaks no back 7  
 removed edges 24  
 prop rem edges 0.125

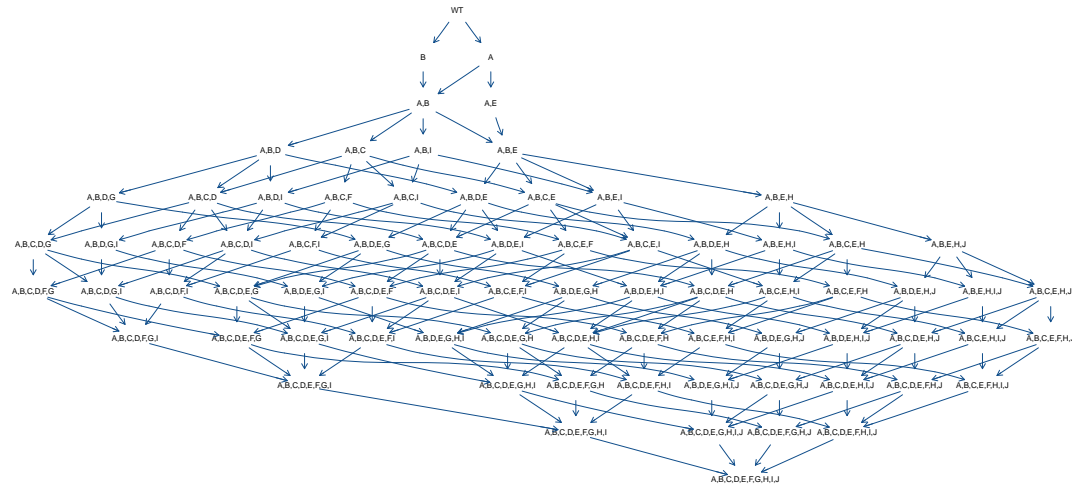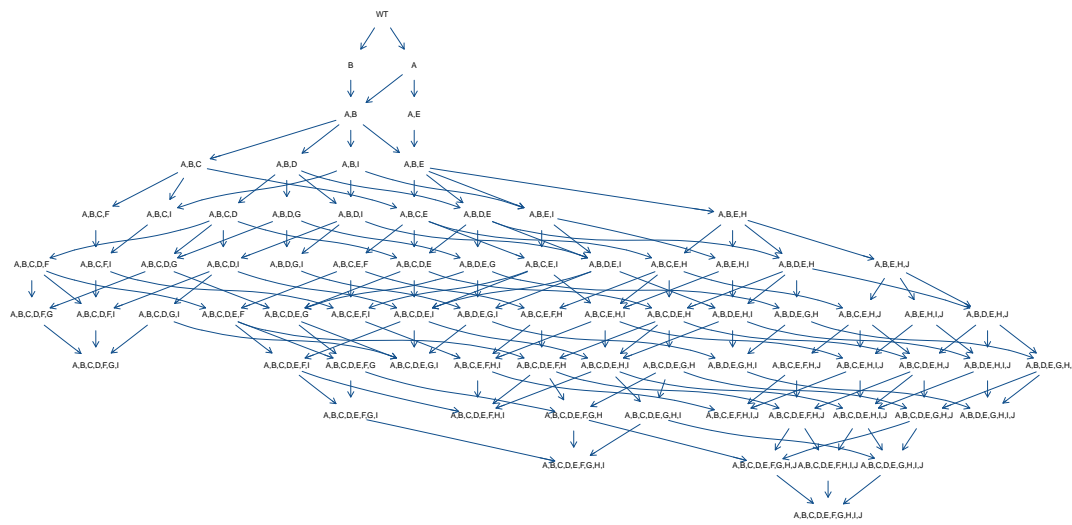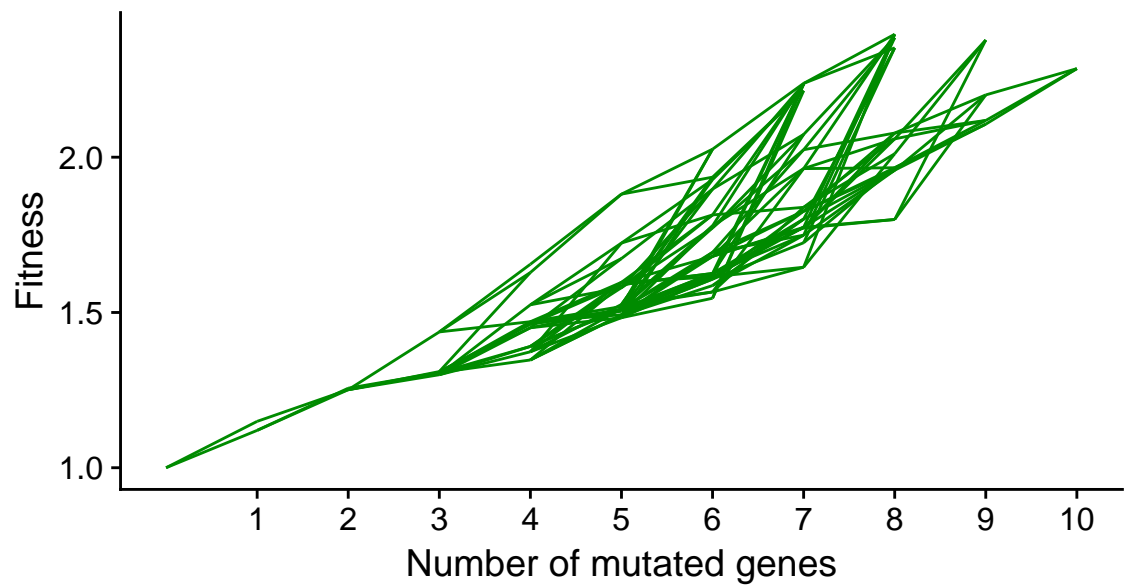

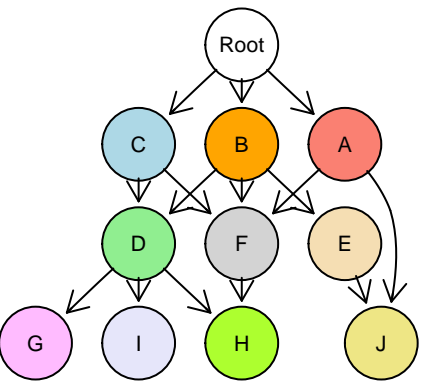

ID 6j2DyMAhErFeSJJe  
 acc genotypes 61  
 peaks no back 9  
 removed edges 26  
 prop rem edges 0.186

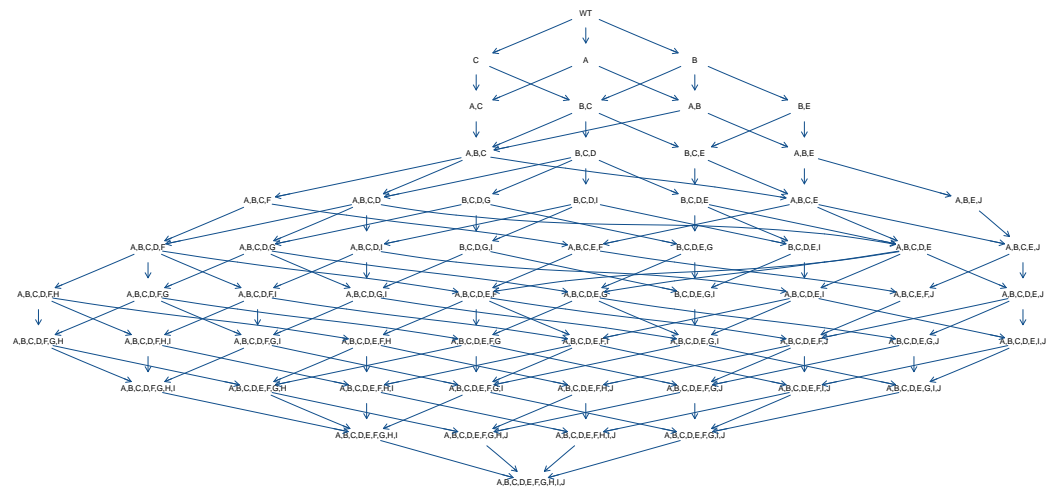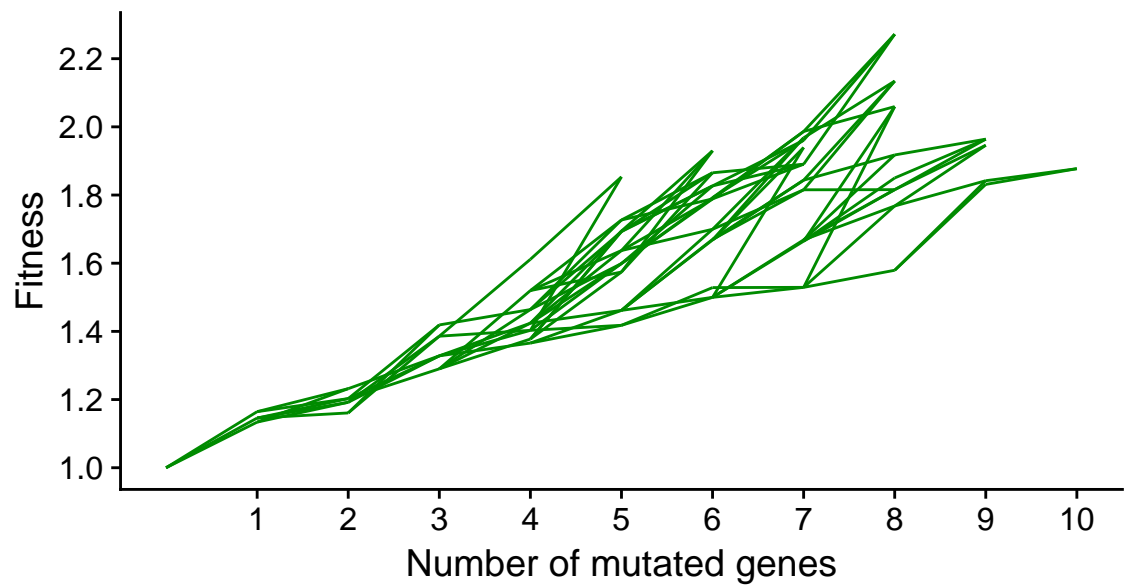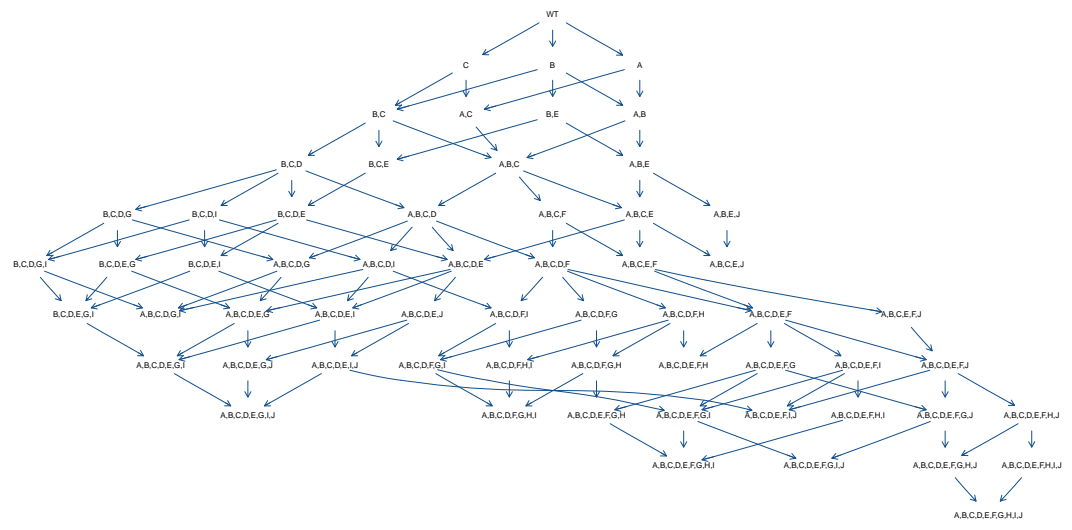

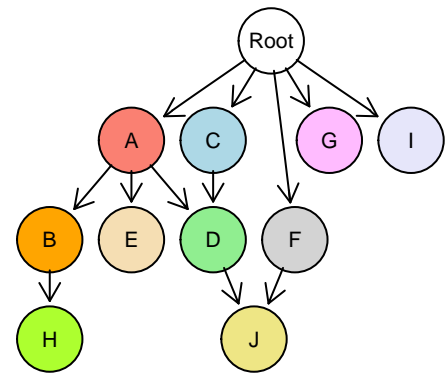

ID **7wUPQMRQPYFpPVSq**  
 acc genotypes **184**  
 peaks no back **17**  
 removed edges **135**  
 prop rem edges **0.224**

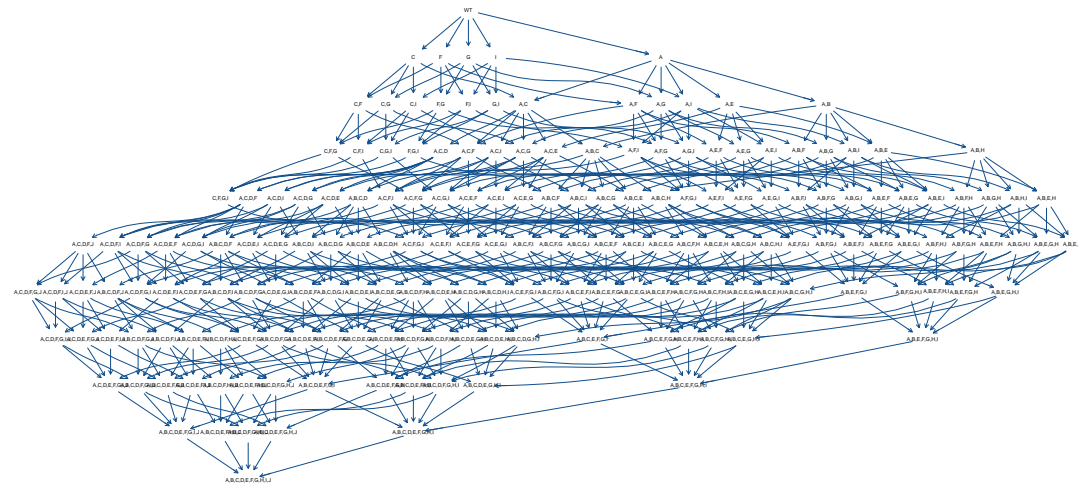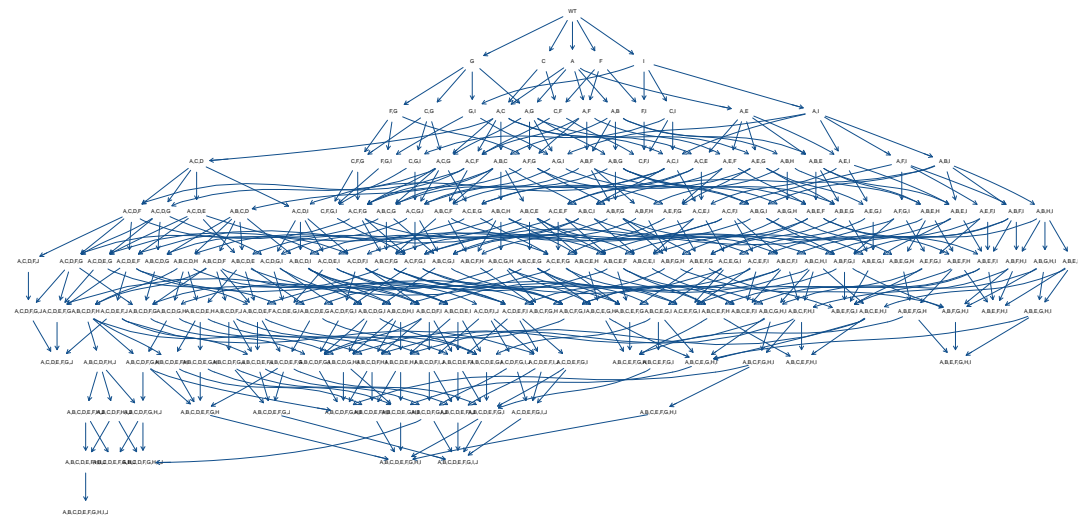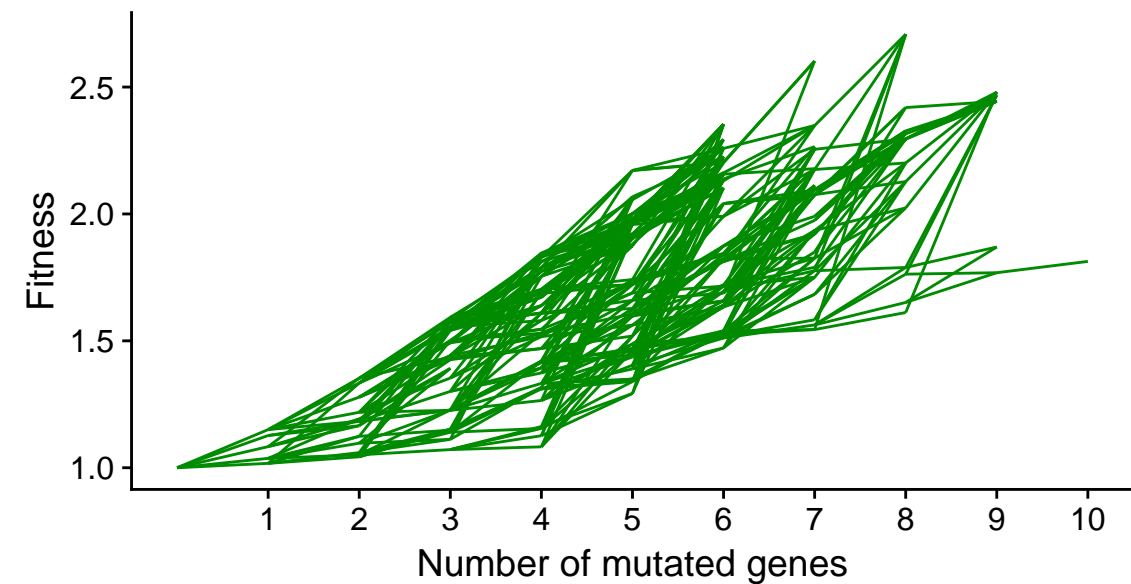

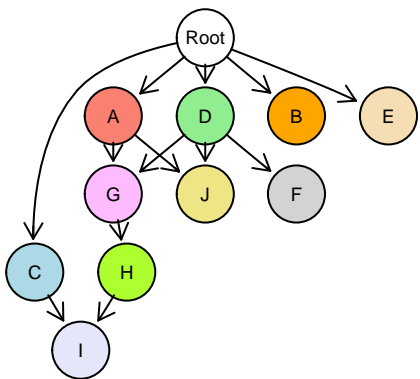

ID 87fcnp96NbP7zN7N  
 acc genotypes 144  
 peaks no back 13  
 removed edges 63  
 prop rem edges 0.141

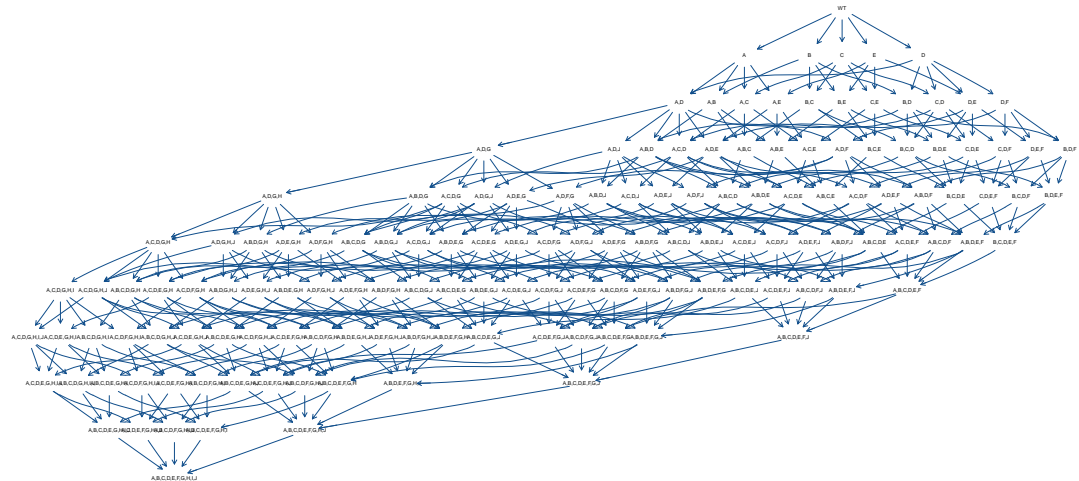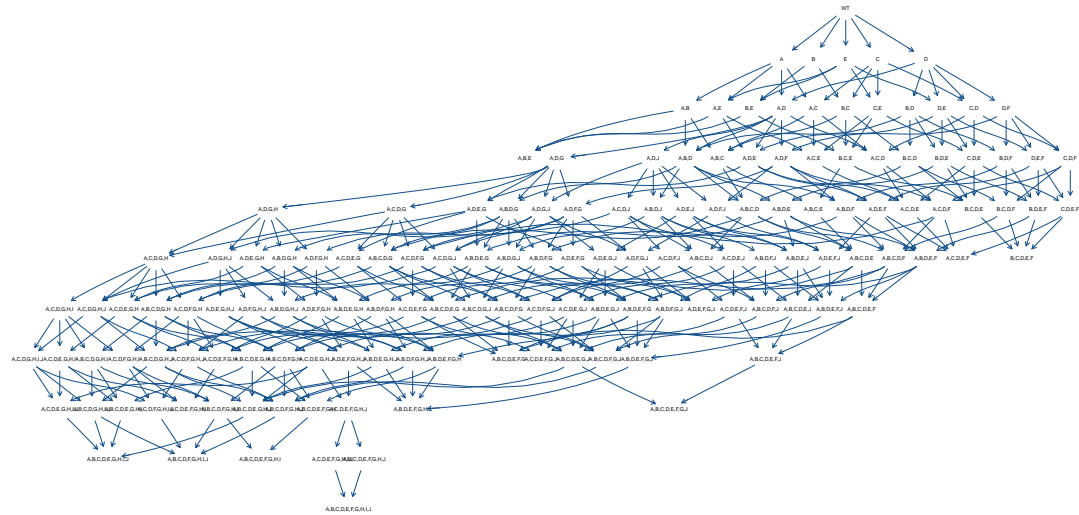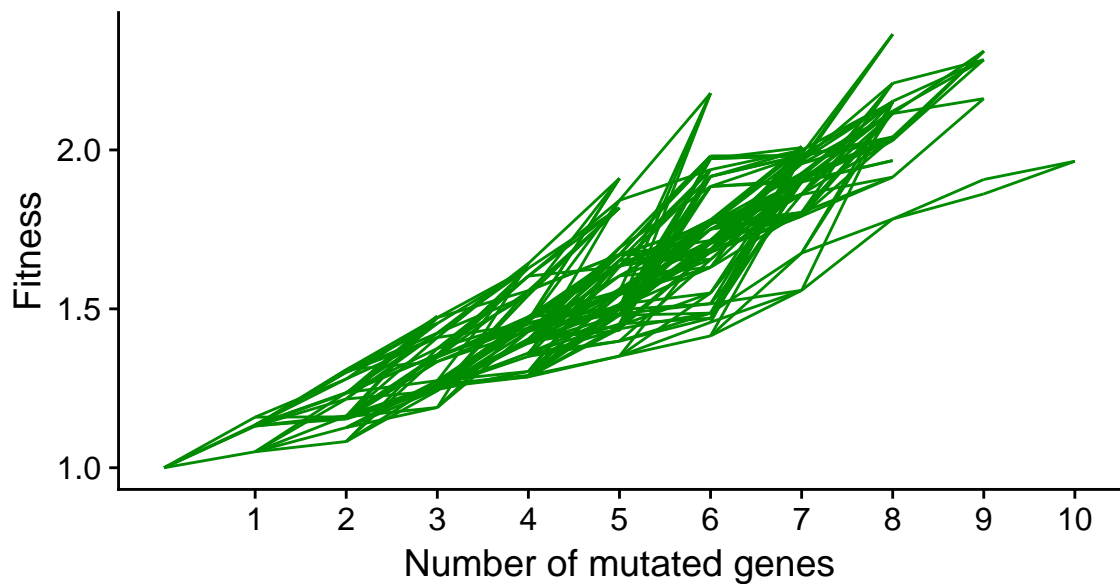

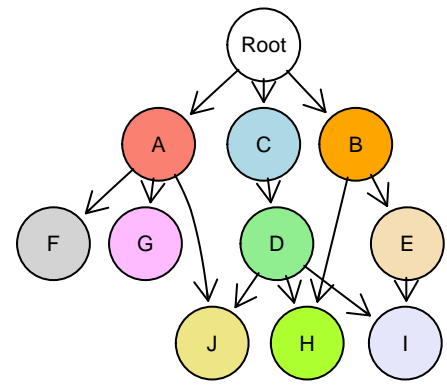

ID 8GlpgW8kSqHXEOja  
 acc genotypes 93  
 peaks no back 9  
 removed edges 40  
 prop rem edges 0.165

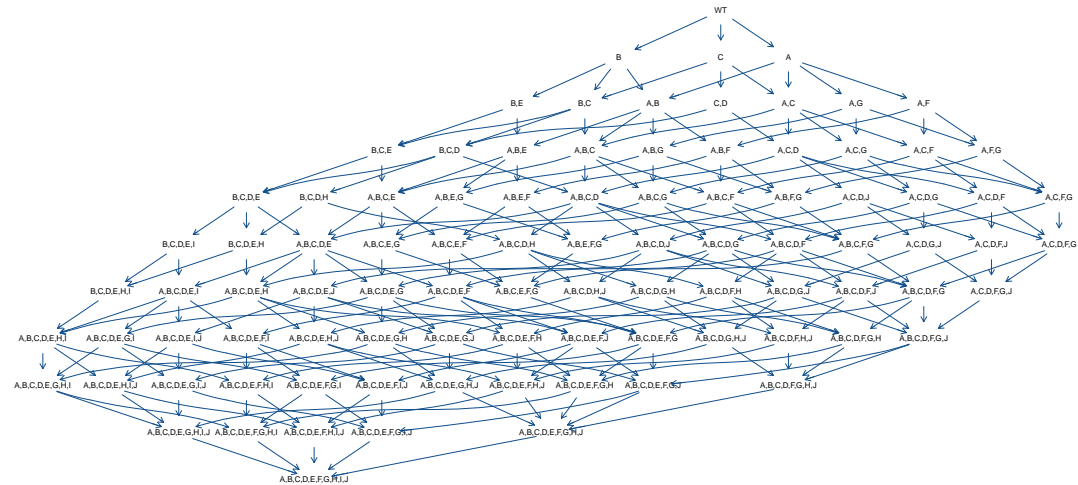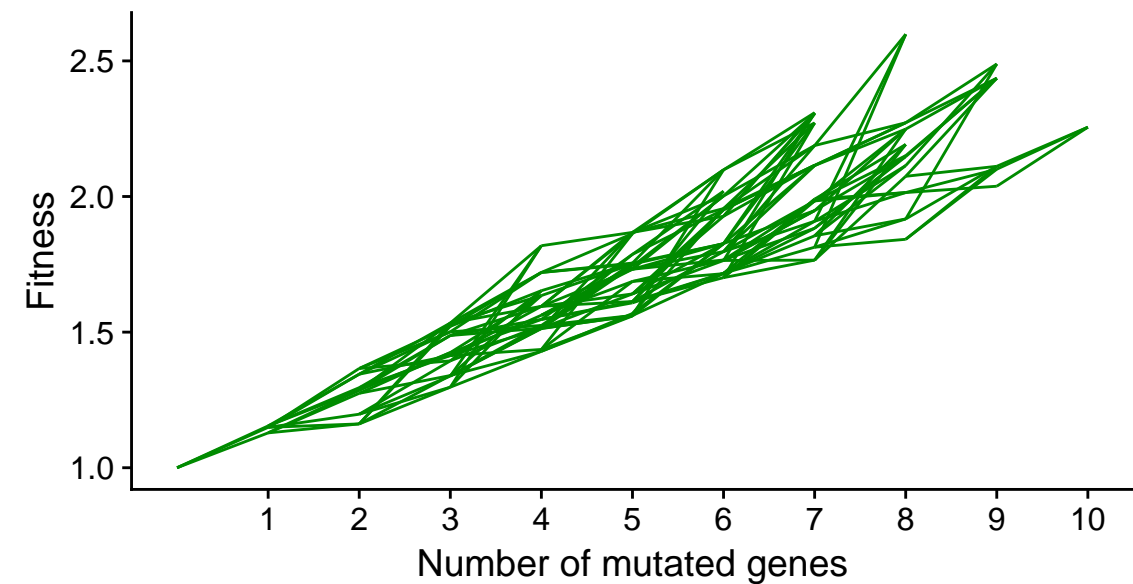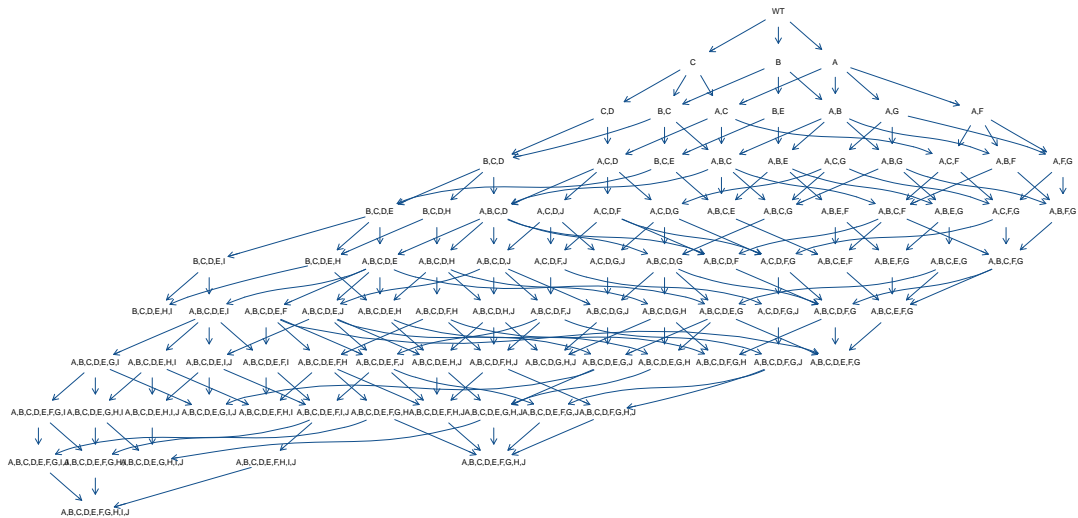



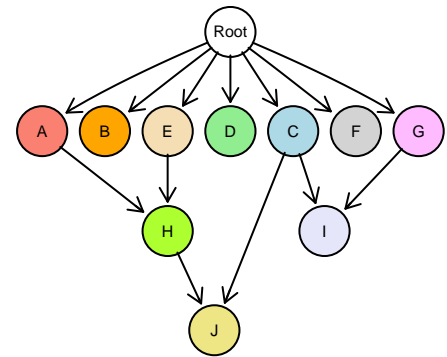

*ID* 8OAYTmnWfxxdHTRV  
*acc genotypes* 224  
*peaks no back* 18  
*removed edges* 163  
*prop rem edges* 0.21

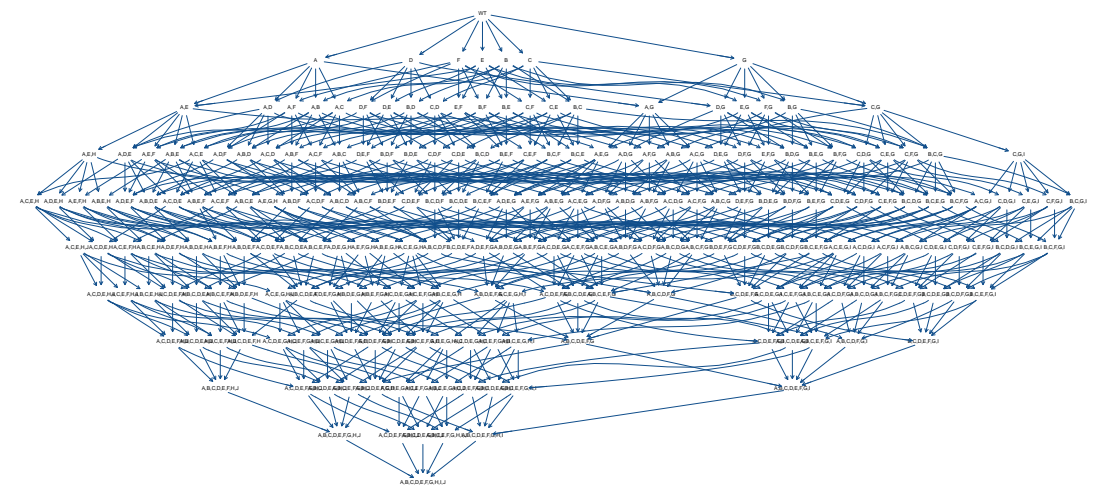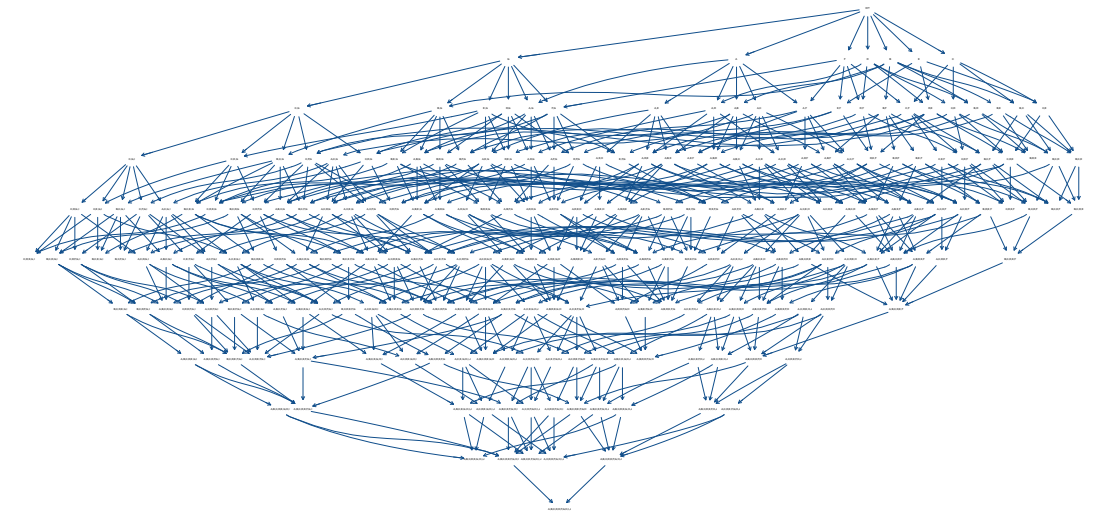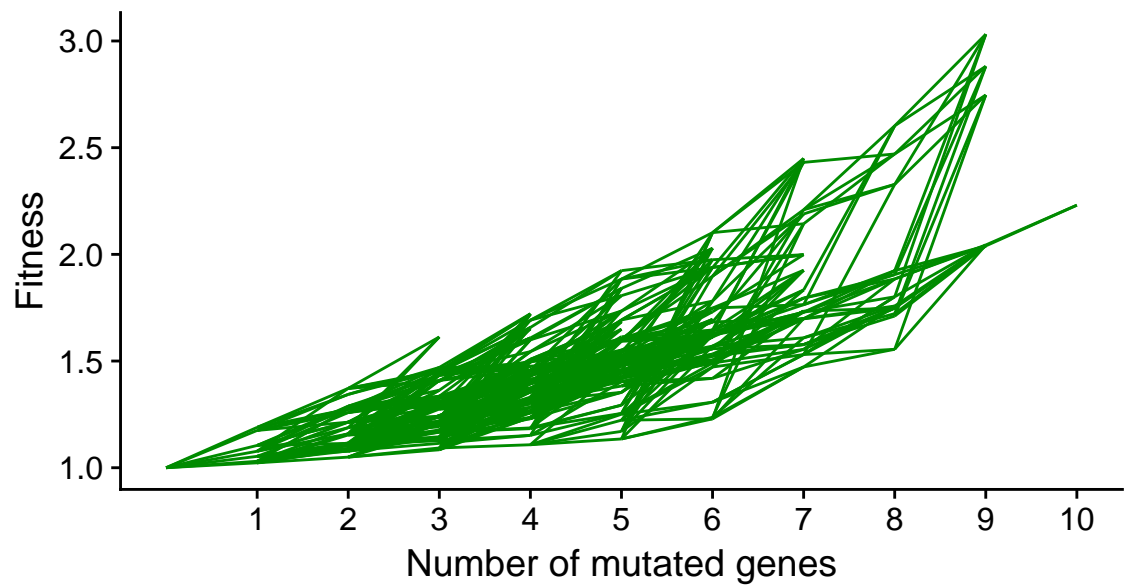

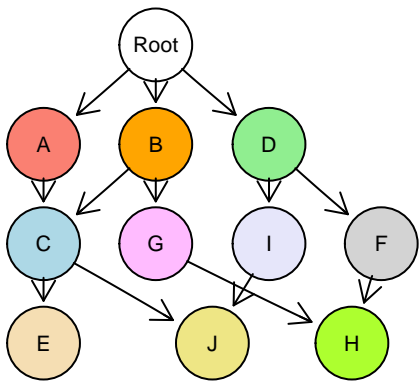

ID 8pBC5Dt22yGwrF10l  
 acc genotypes 68  
 peaks no back 2  
 removed edges 15  
 prop rem edges 0.095

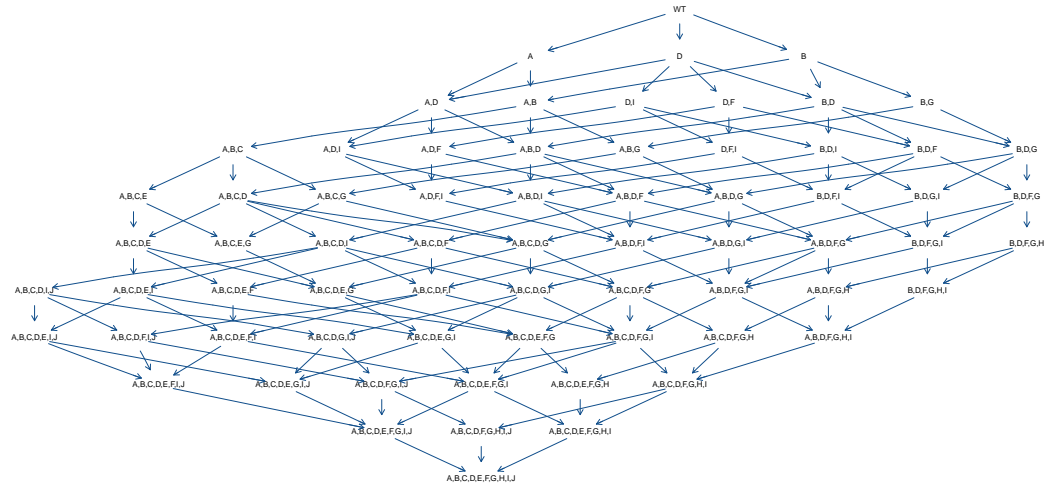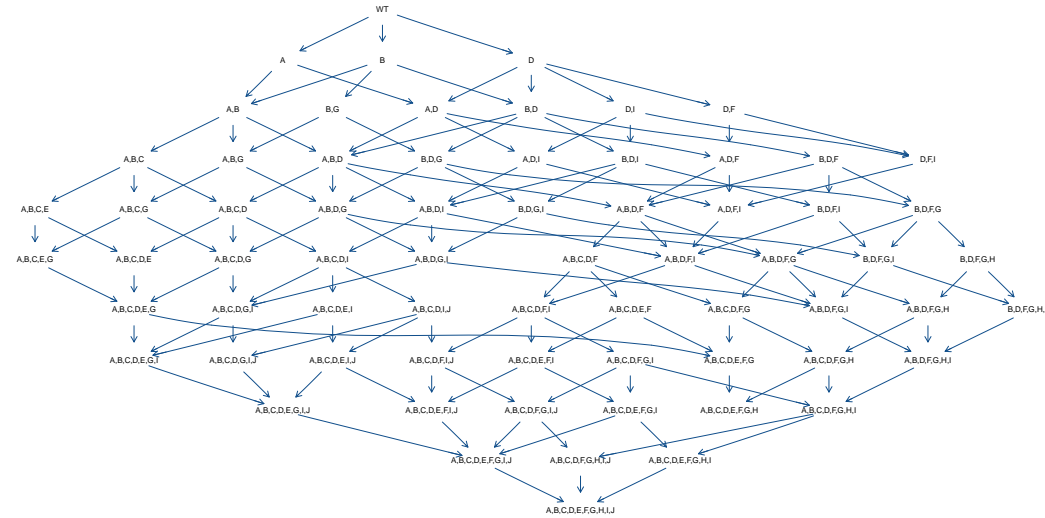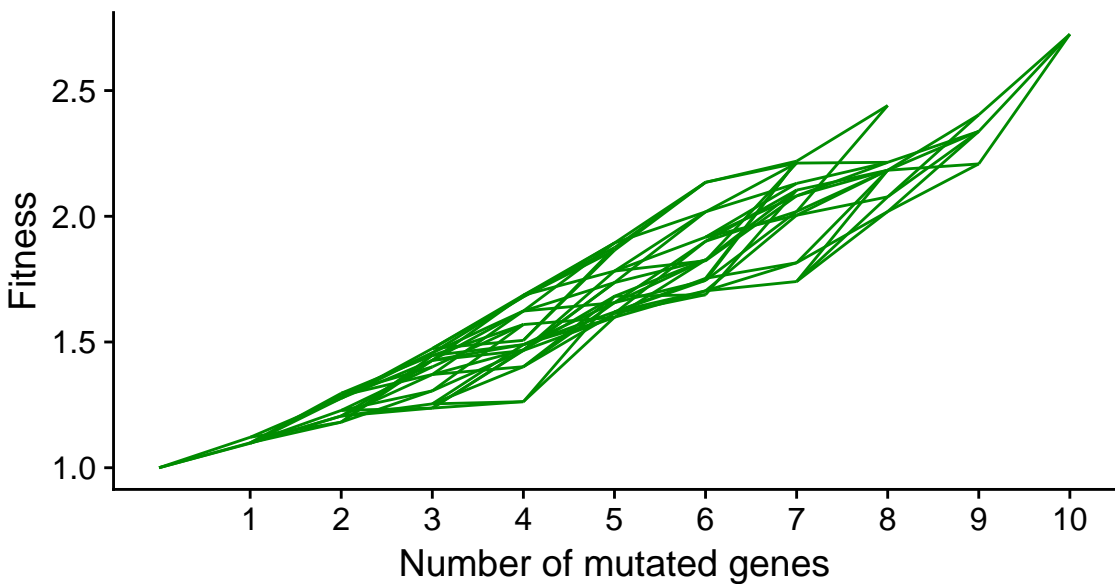

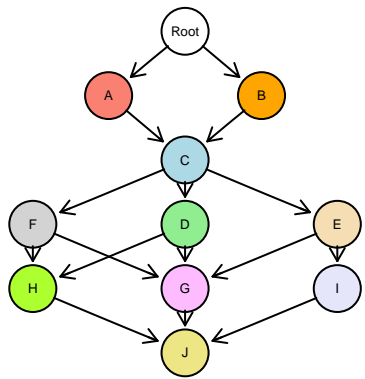

ID **8zRUVMJqJUMsBBkl**  
 acc genotypes **24**  
 peaks no back **4**  
 removed edges **3**  
 prop rem edges **0.077**

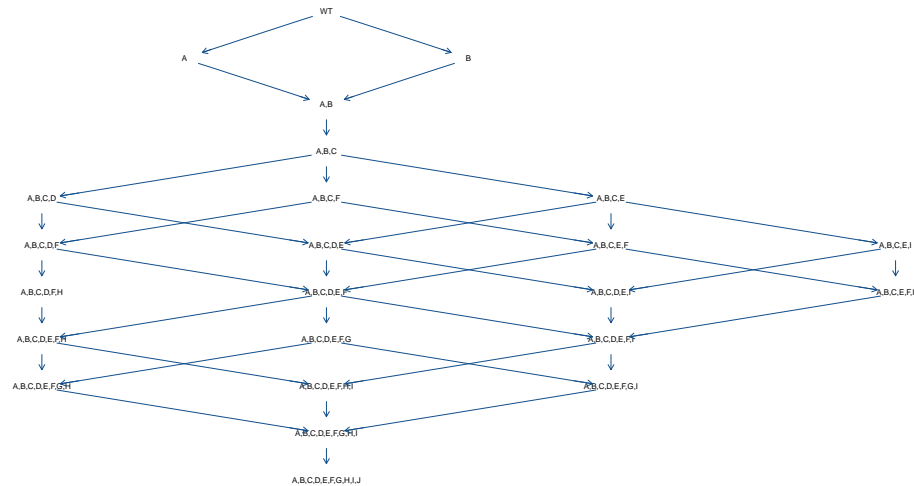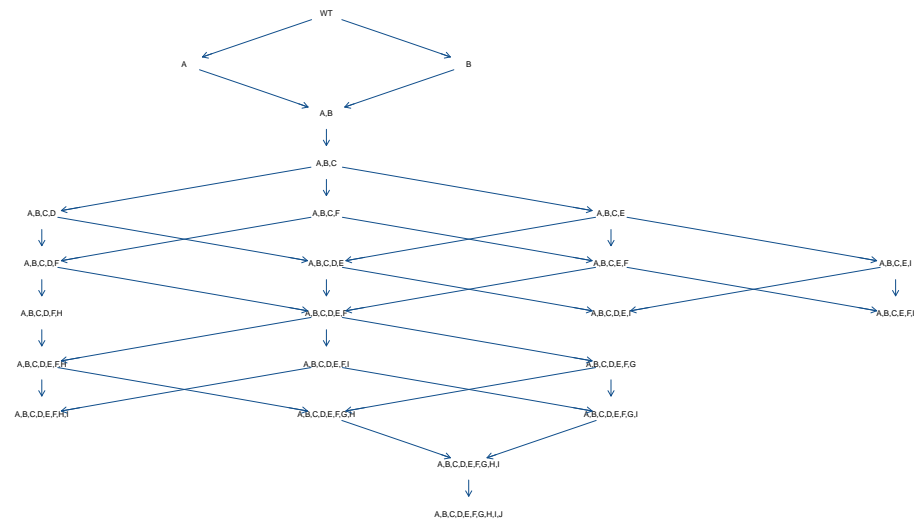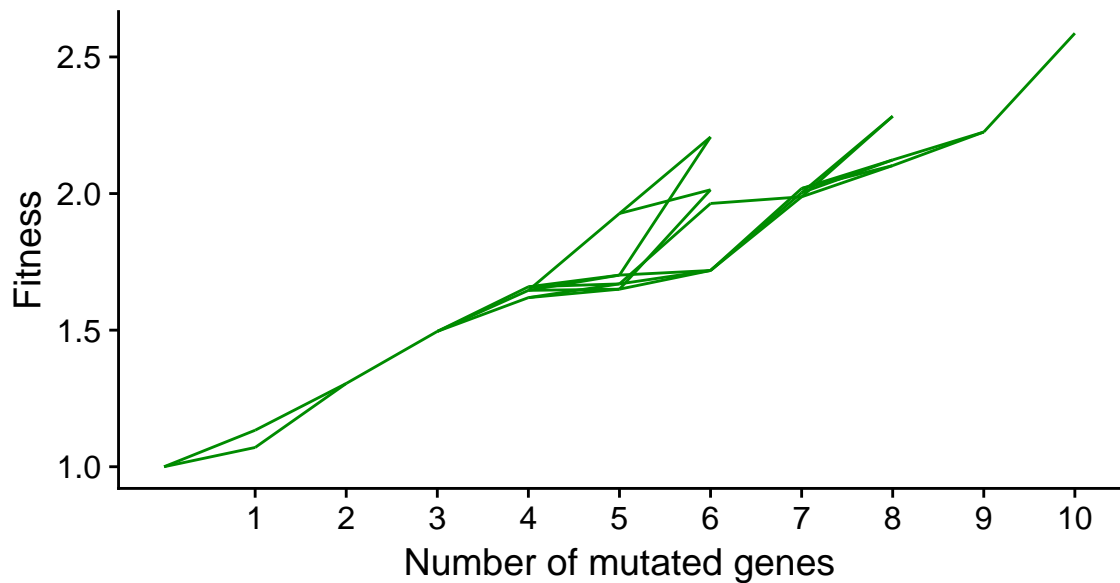

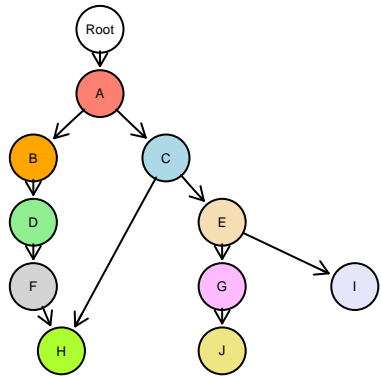

ID 8ZUclGXESgYkqacc  
 acc genotypes 40  
 peaks no back 6  
 removed edges 13  
 prop rem edges 0.171

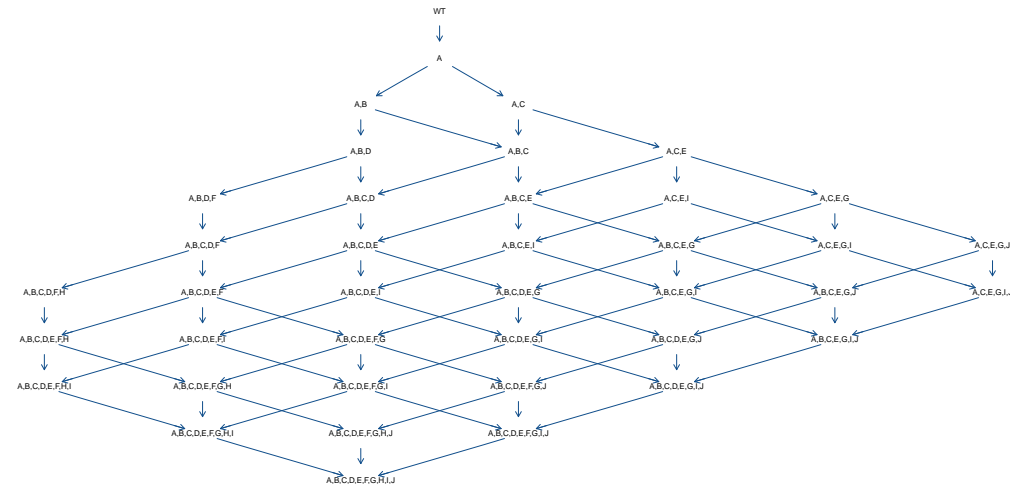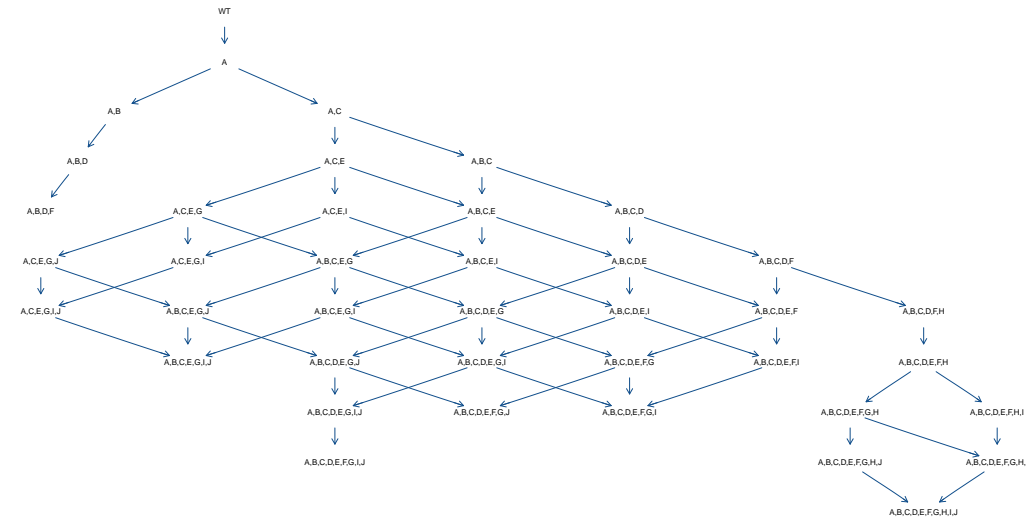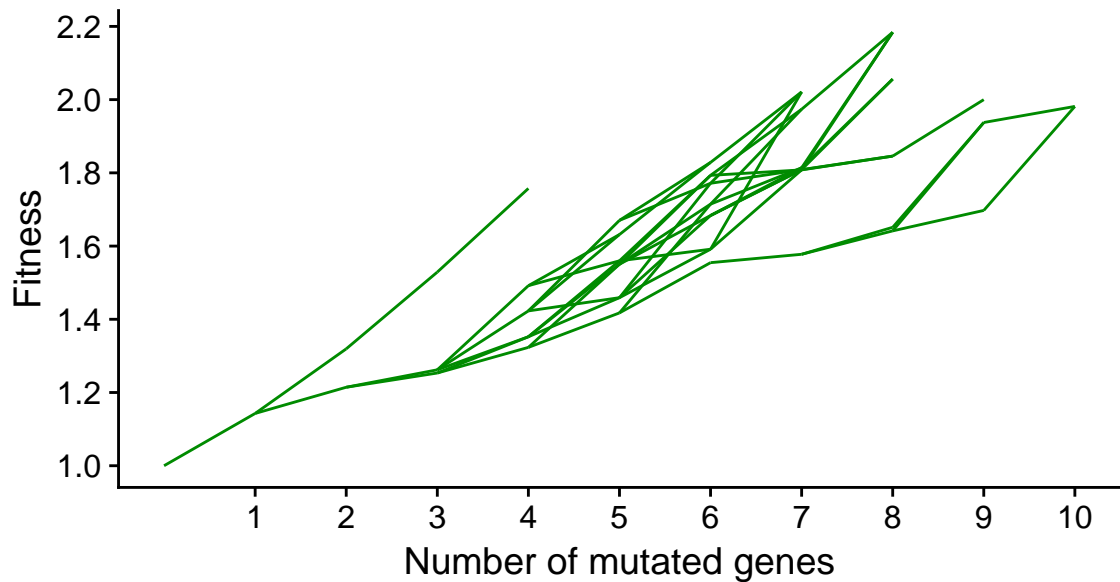

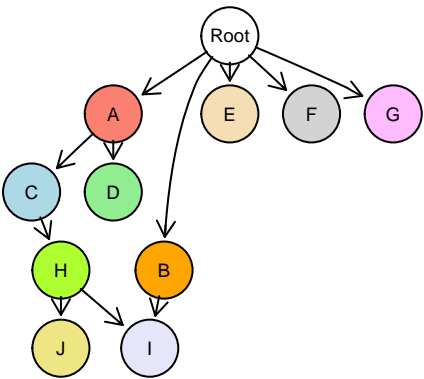

ID 92mZfe3axm10pyB100  
 acc genotypes 176  
 peaks no back 15  
 removed edges 108  
 prop rem edges 0.188

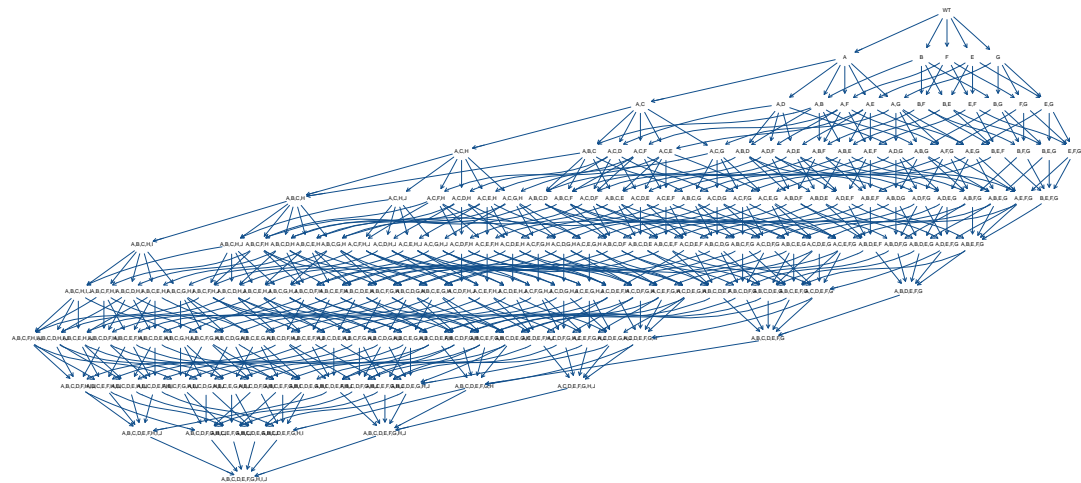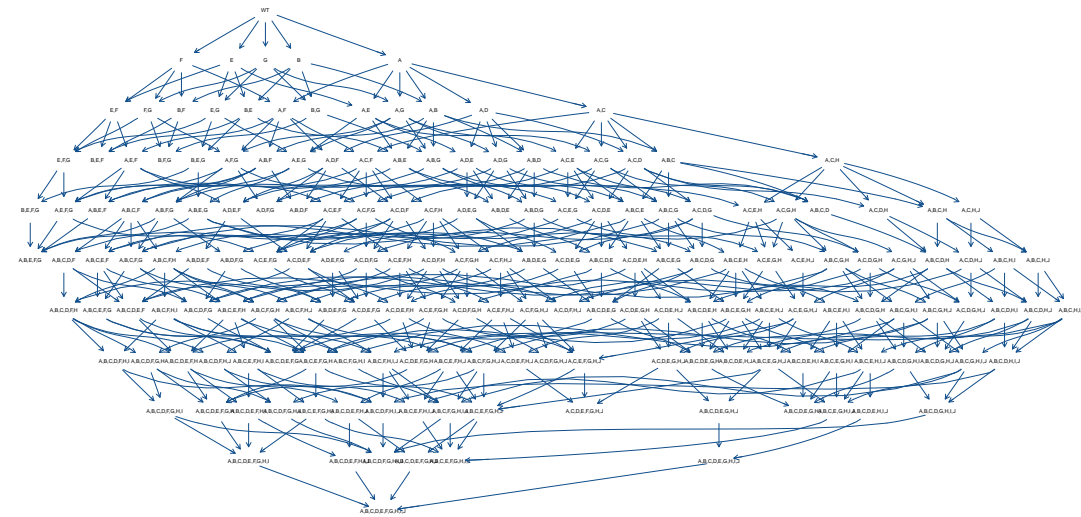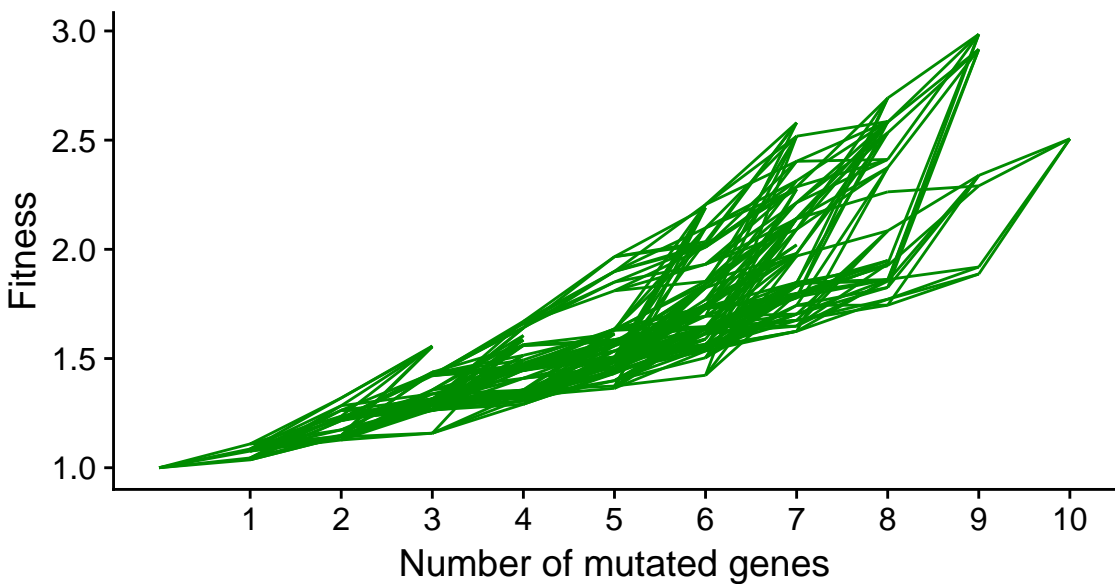

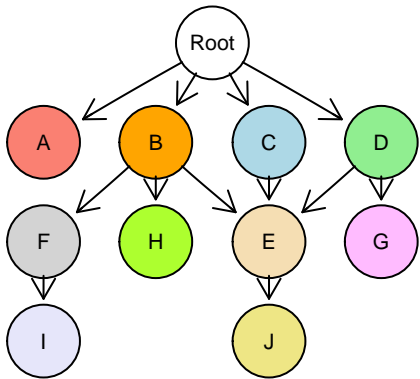

*ID* 9tzPJQwcPFgCvZpS  
*acc genotypes* 132  
*peaks no back* 12  
*removed edges* 78  
*prop rem edges* 0.201

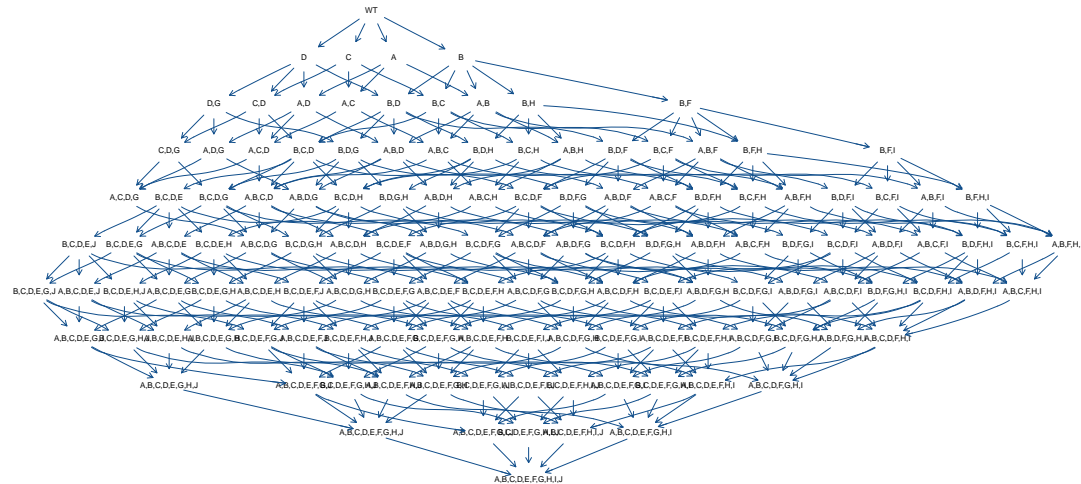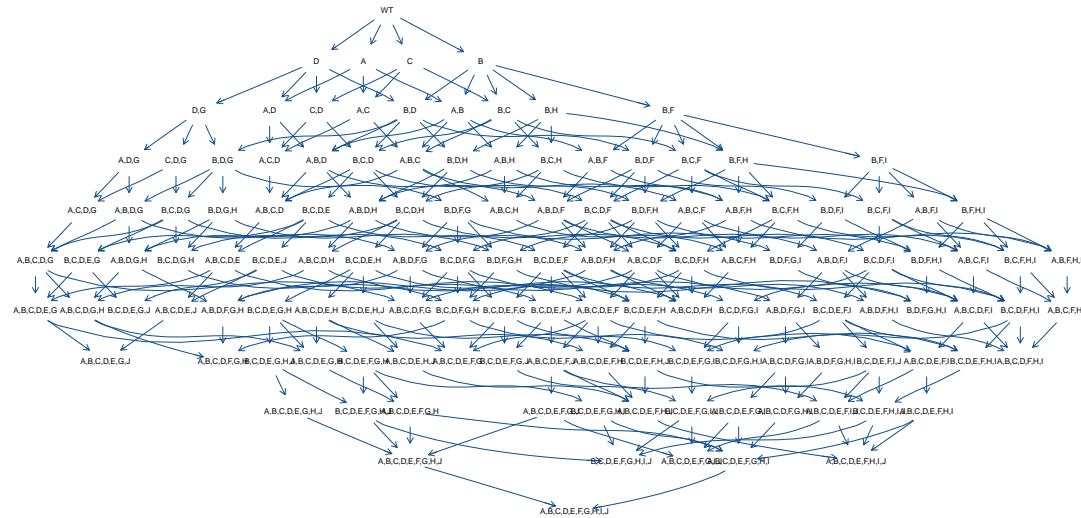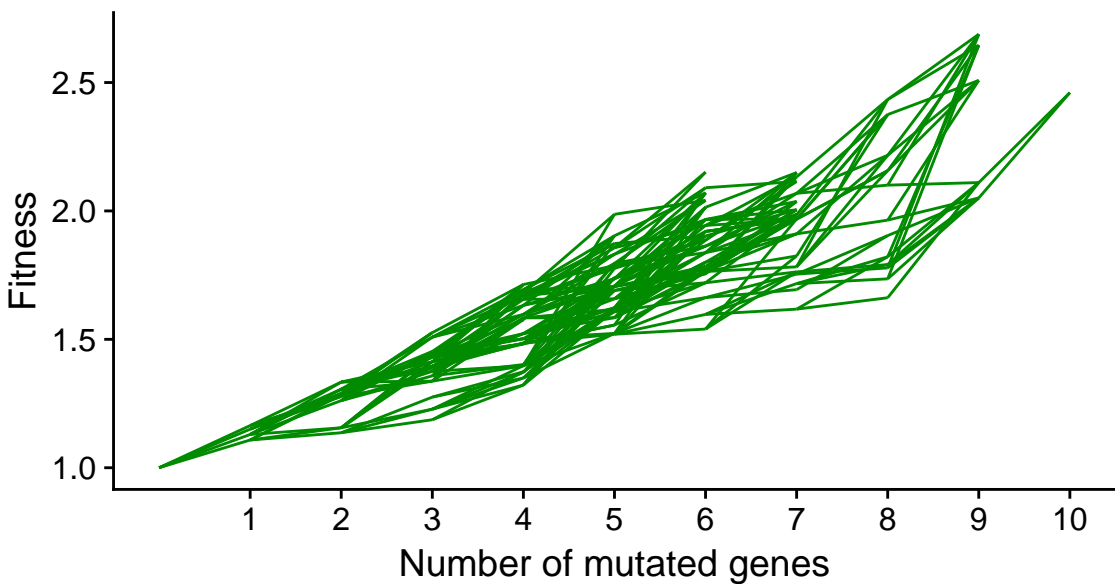

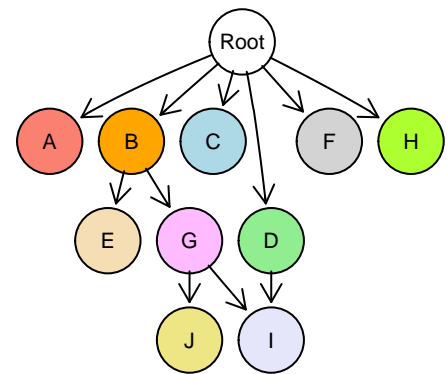

*ID* 9XhdPR4OnXtyF10ls  
*acc genotypes* 288  
*peaks no back* 21  
*removed edges* 224  
*prop rem edges* 0.209

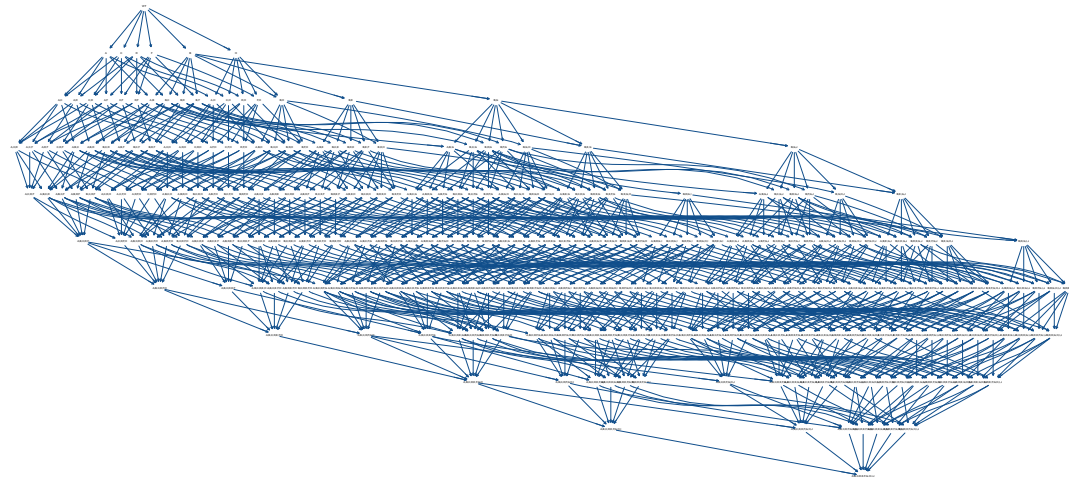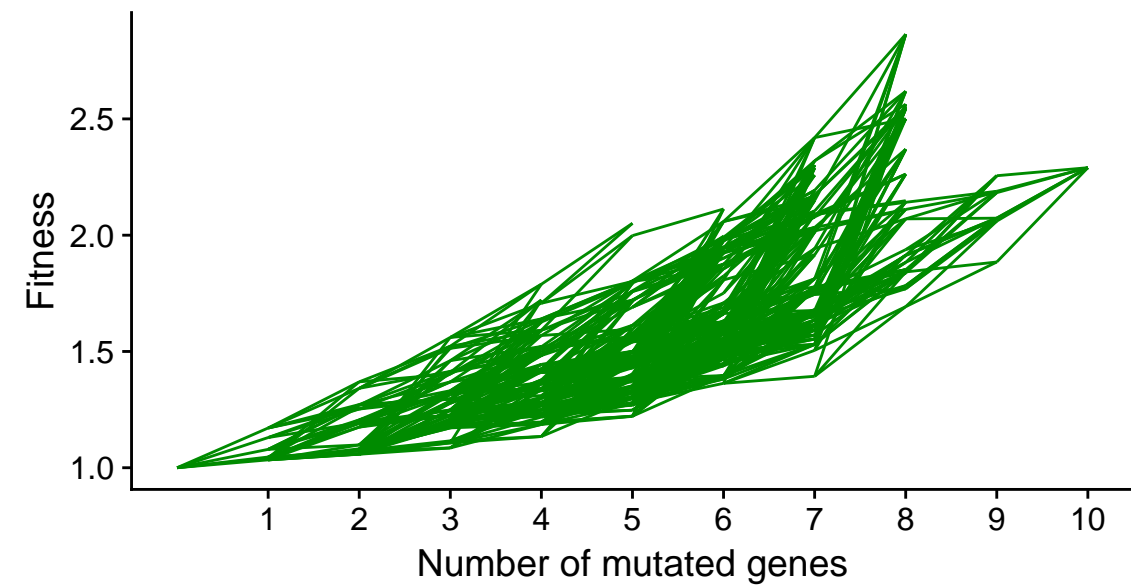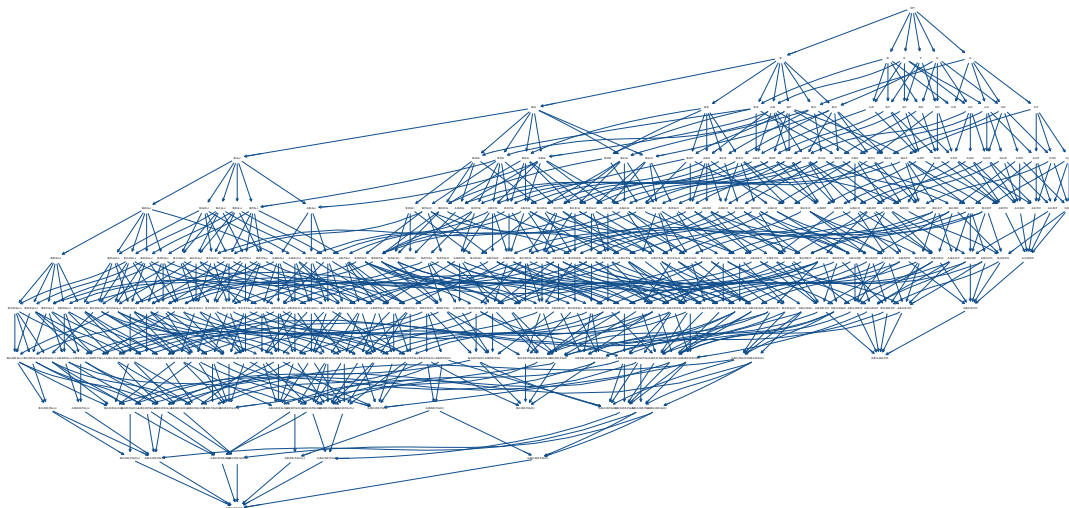

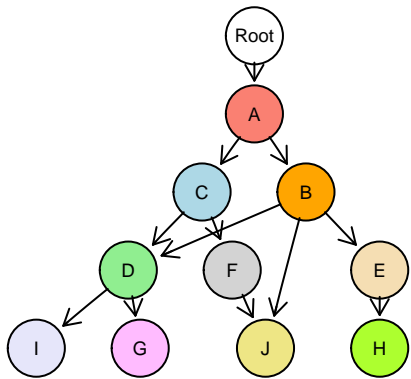

ID **AAvENuRd7EV7ymhh**  
 acc genotypes **52**  
 peaks no back **8**  
 removed edges **21**  
 prop rem edges **0.181**

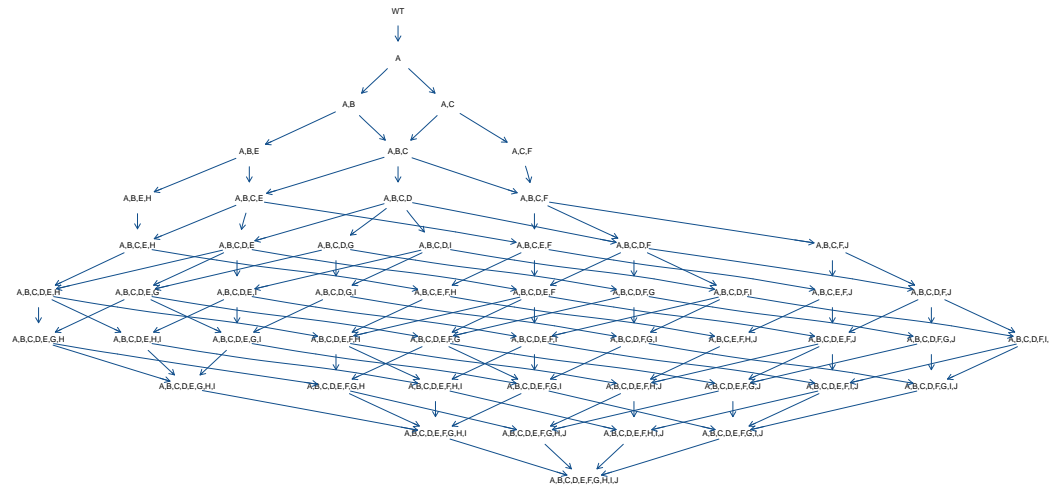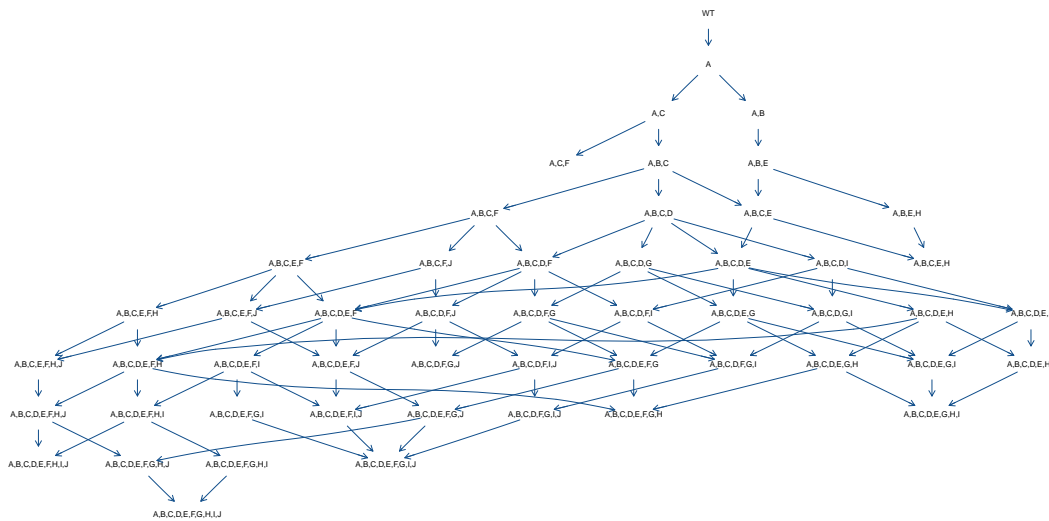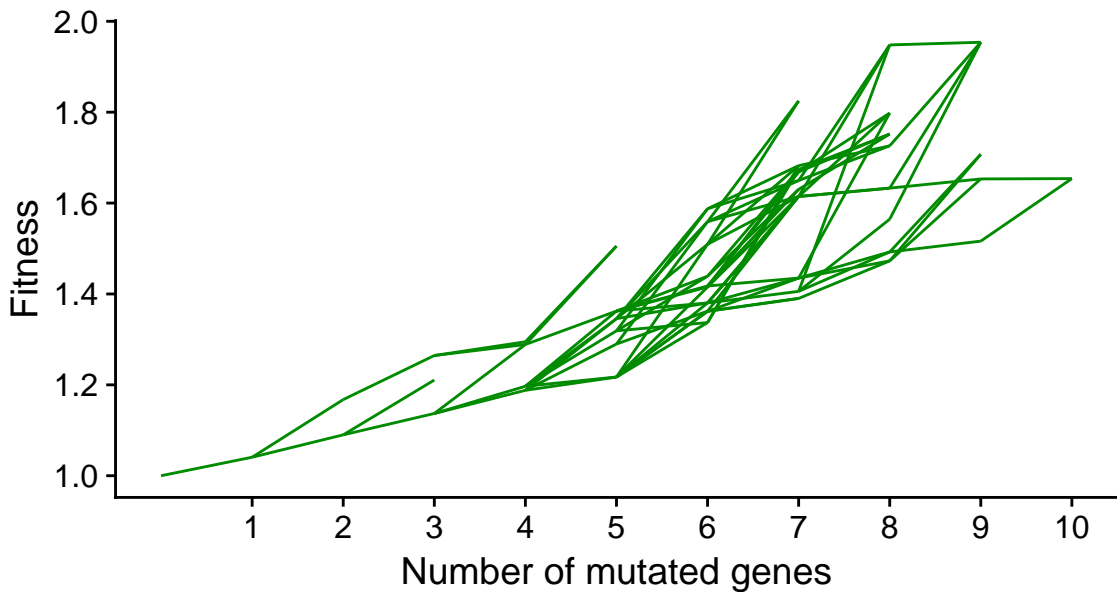



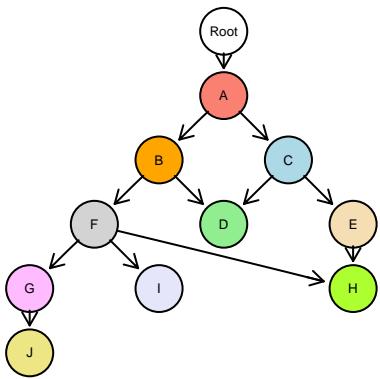

*ID* aeSijOttBLISw1Z1  
*acc genotypes* 51  
*peaks no back* 8  
*removed edges* 21  
*prop rem edges* 0.186

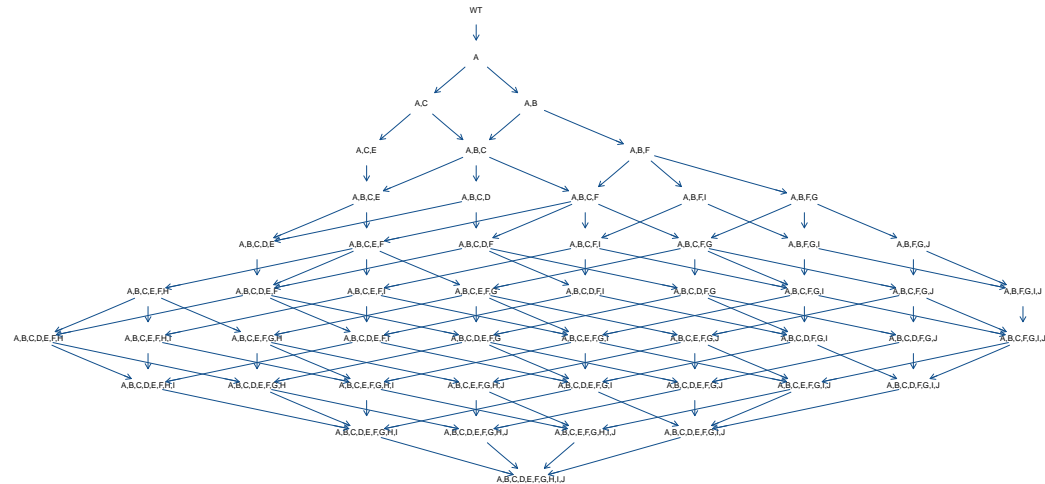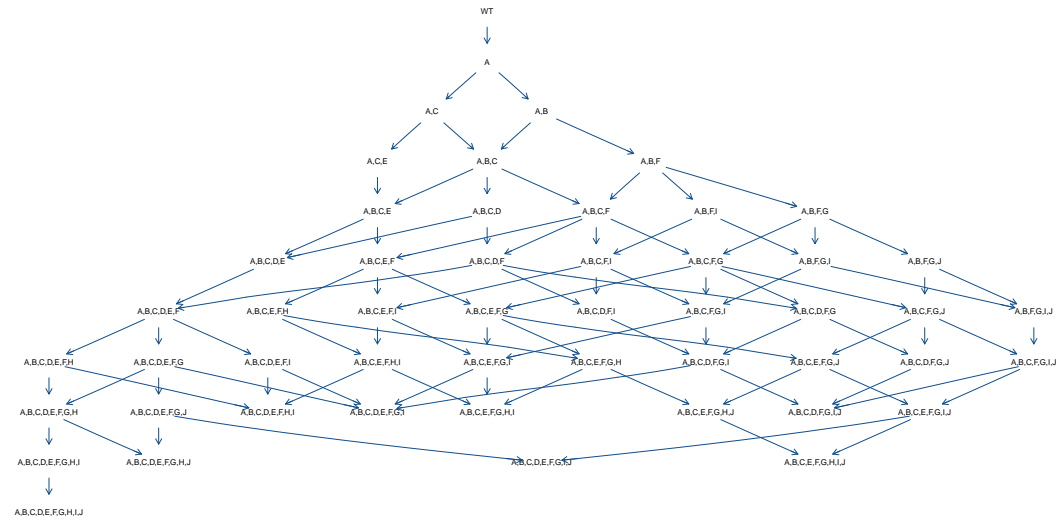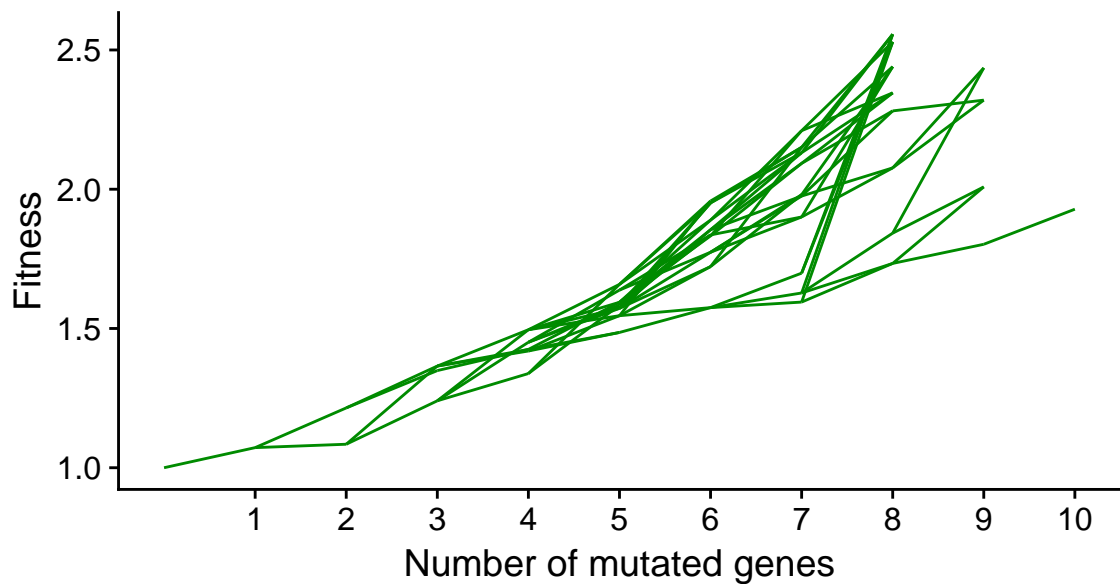

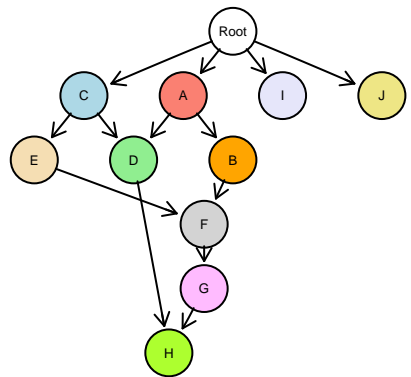

ID **aFSJF5G7y4DBZWSr**  
 acc genotypes **72**  
 peaks no back **8**  
 removed edges **39**  
 prop rem edges **0.217**

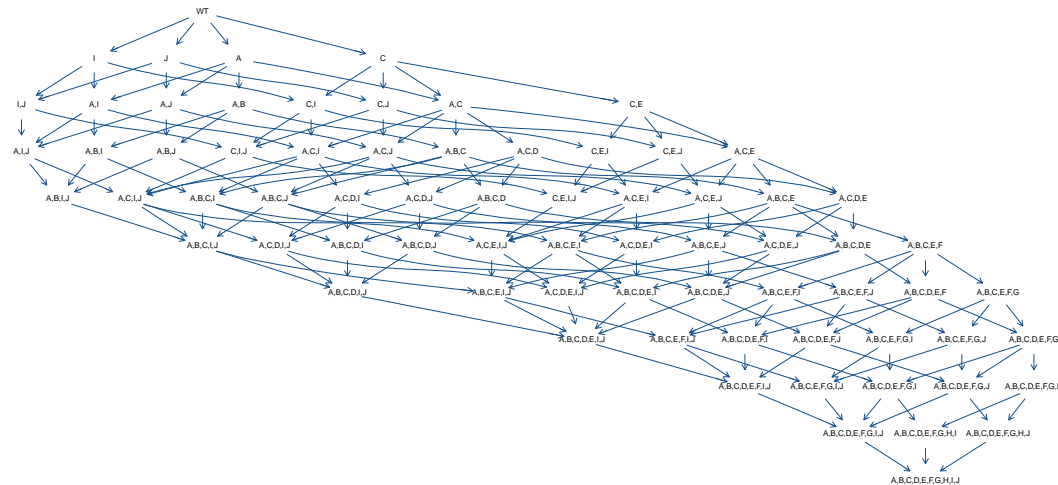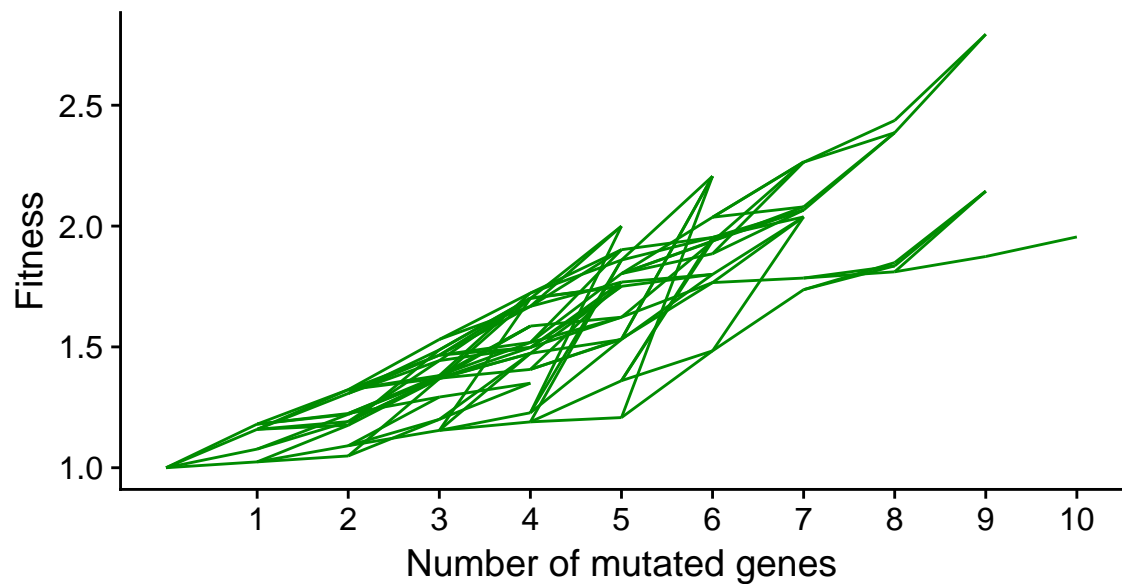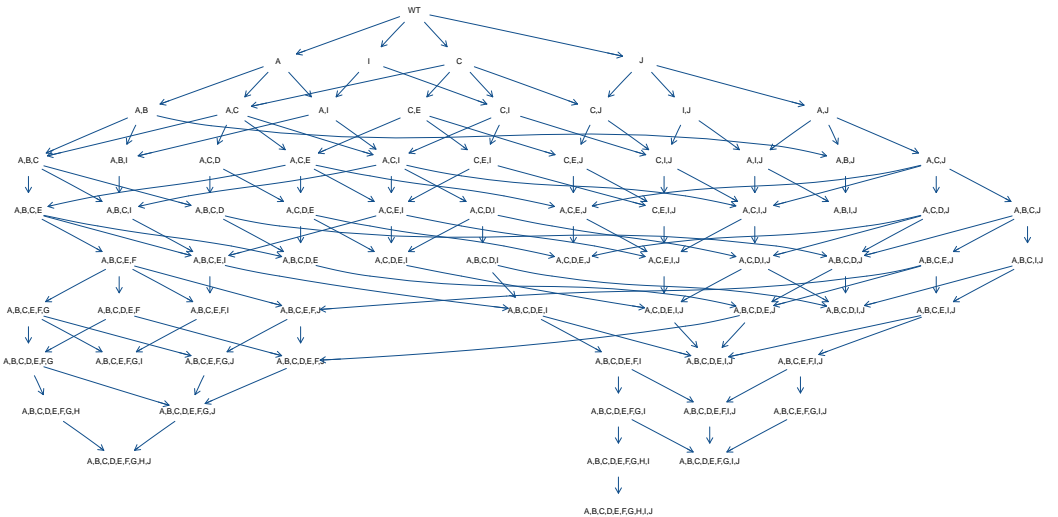

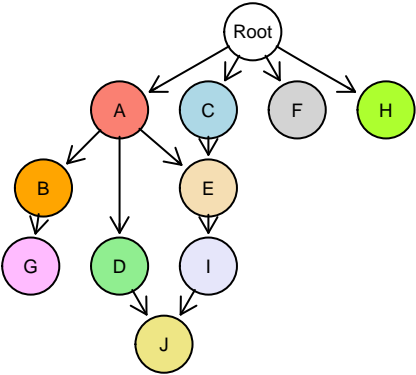

*ID* AjFtq103DguBWTFLW  
*acc genotypes* 116  
*peaks no back* 10  
*removed edges* 74  
*prop rem edges* 0.223

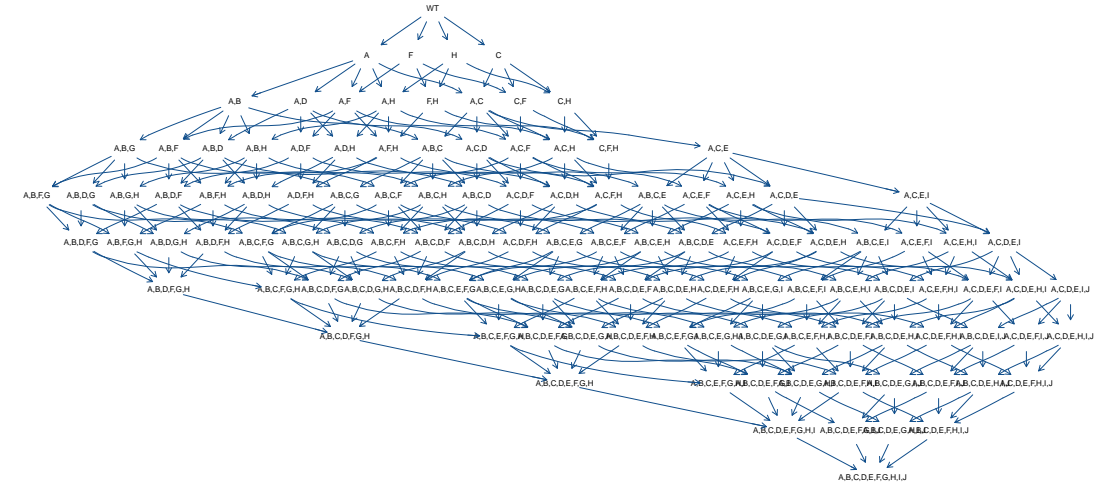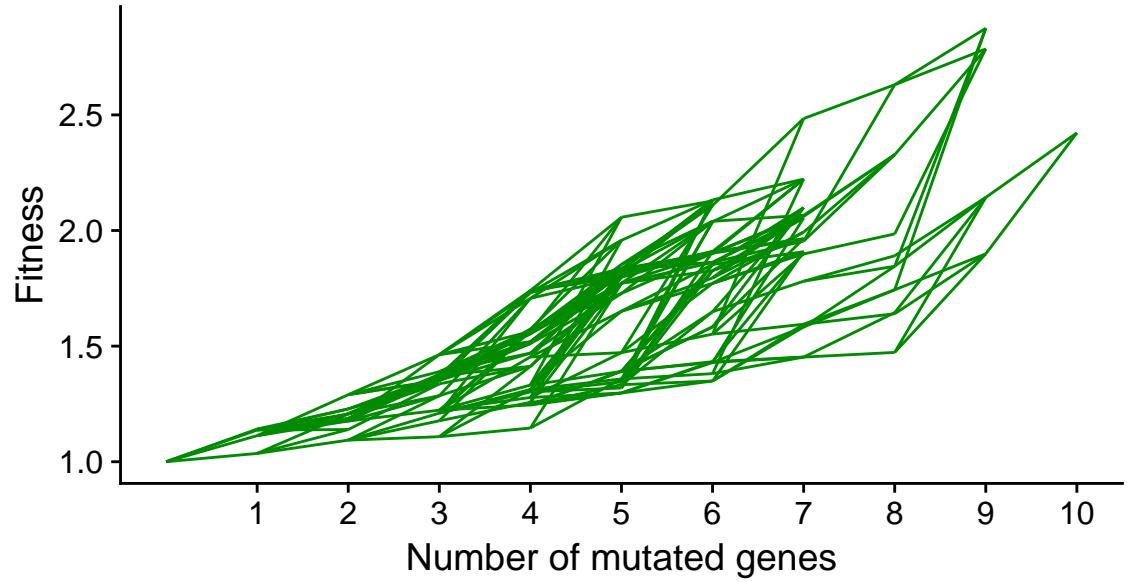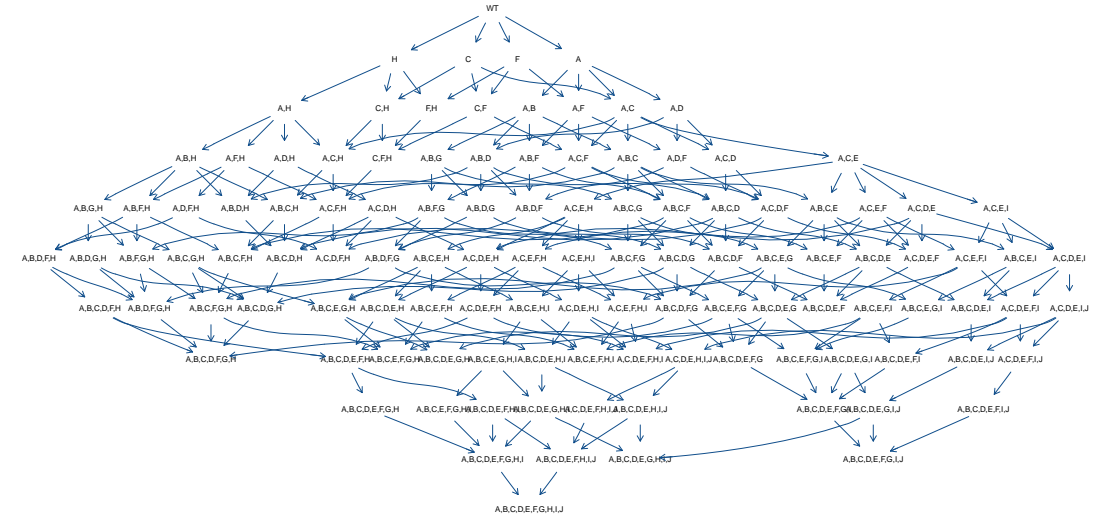

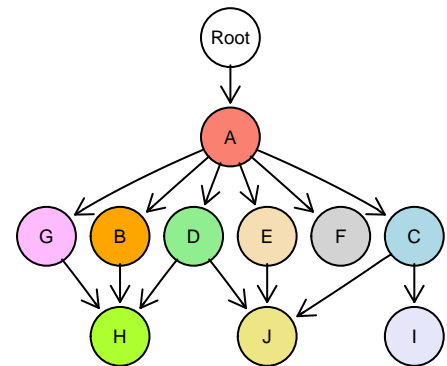

ID **B10D8cwK5cY9qVLNq**  
 acc genotypes **129**  
 peaks no back **13**  
 removed edges **86**  
 prop rem edges **0.217**

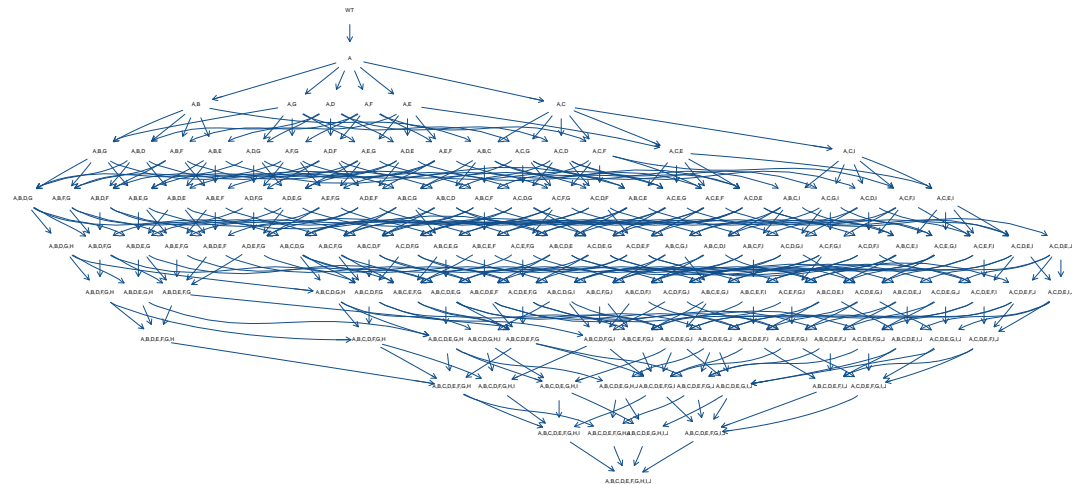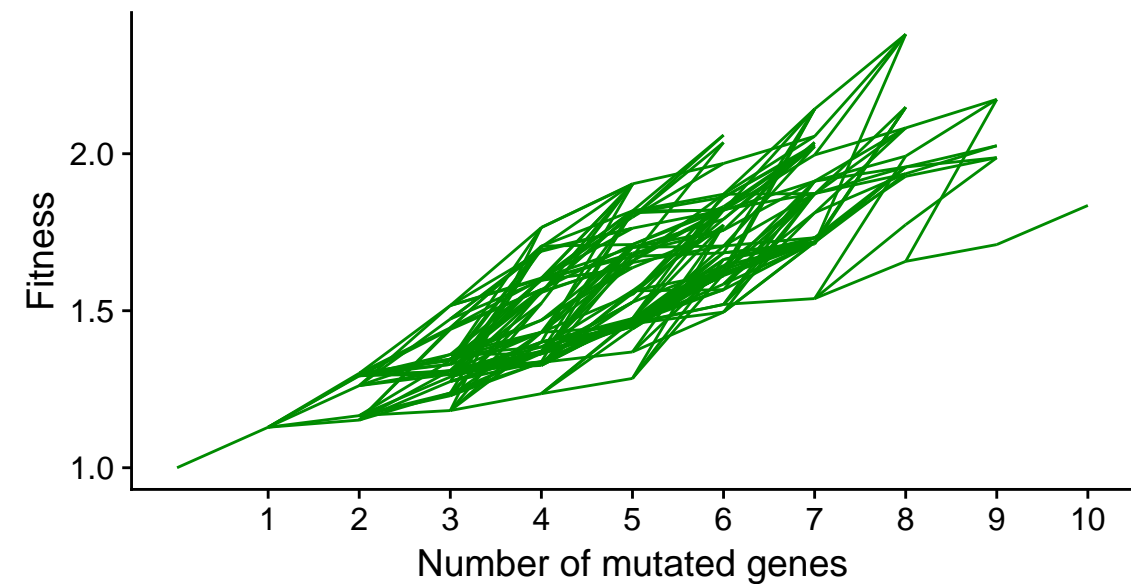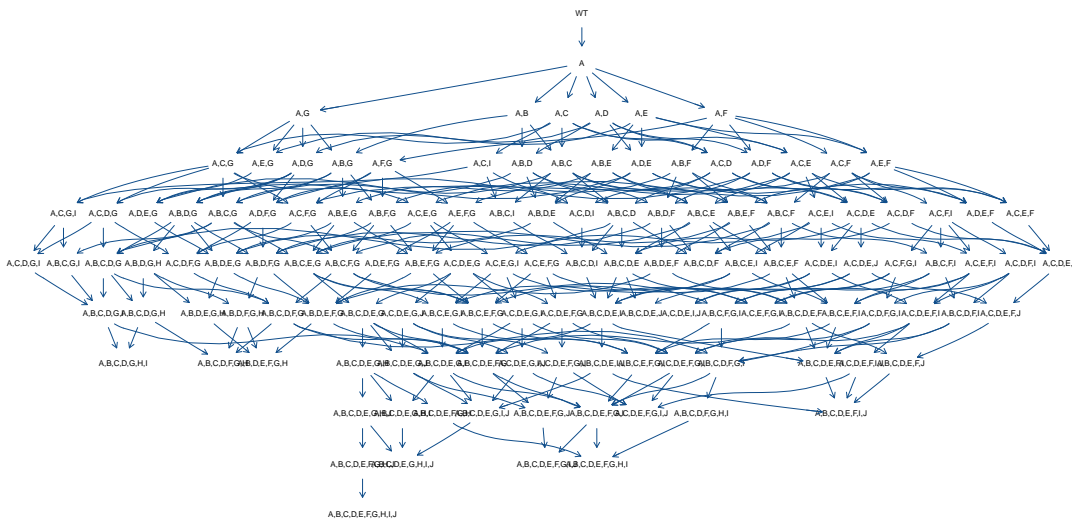

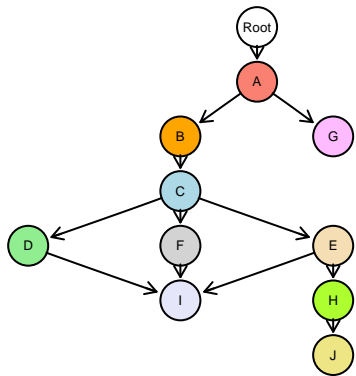

ID **b2dBTAqsSxgbkkTE**  
 acc genotypes **43**  
 peaks no back **7**  
 removed edges **14**  
 prop rem edges **0.152**

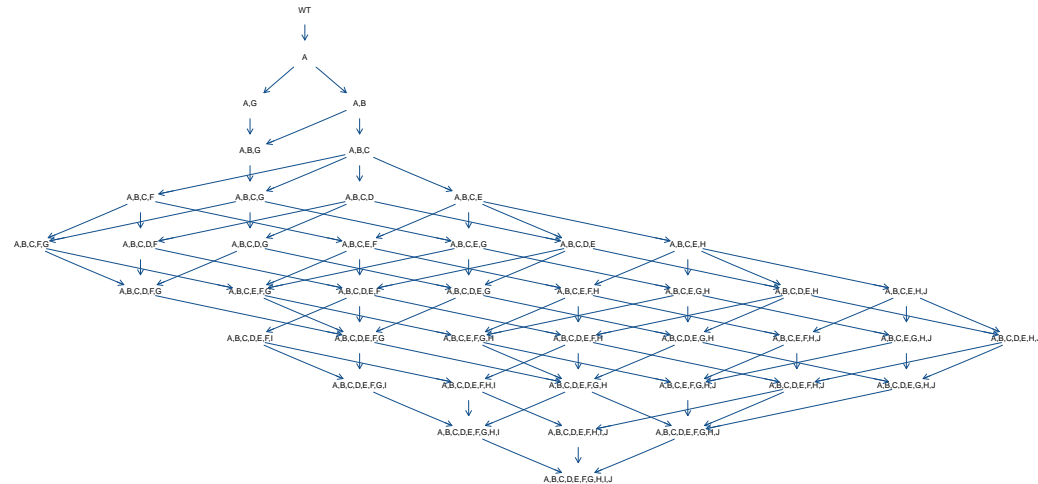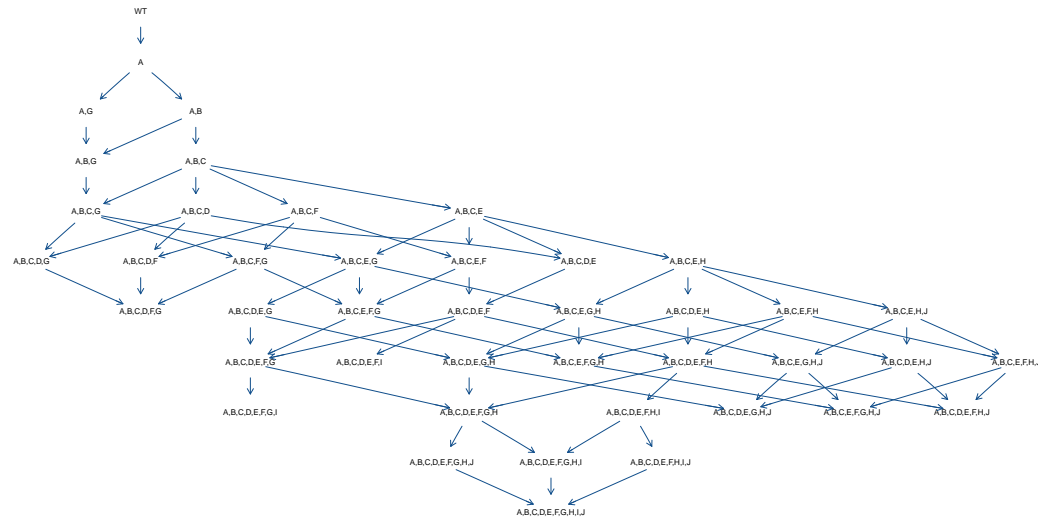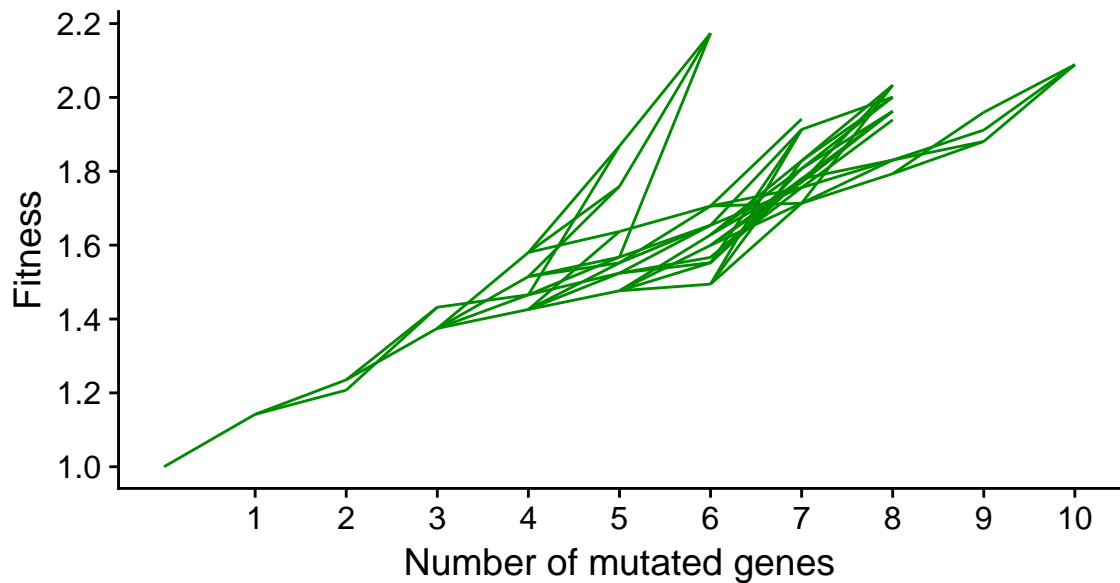

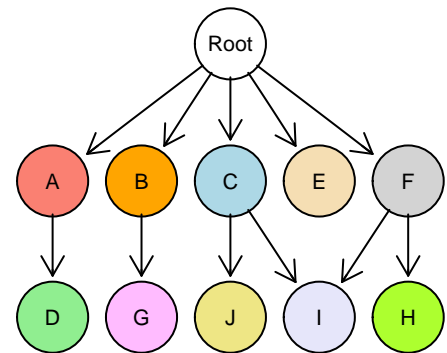

*ID* B8LF4EJa7H2B21J3  
*acc genotypes* 234  
*peaks no back* 14  
*removed edges* 130  
*prop rem edges* 0.165

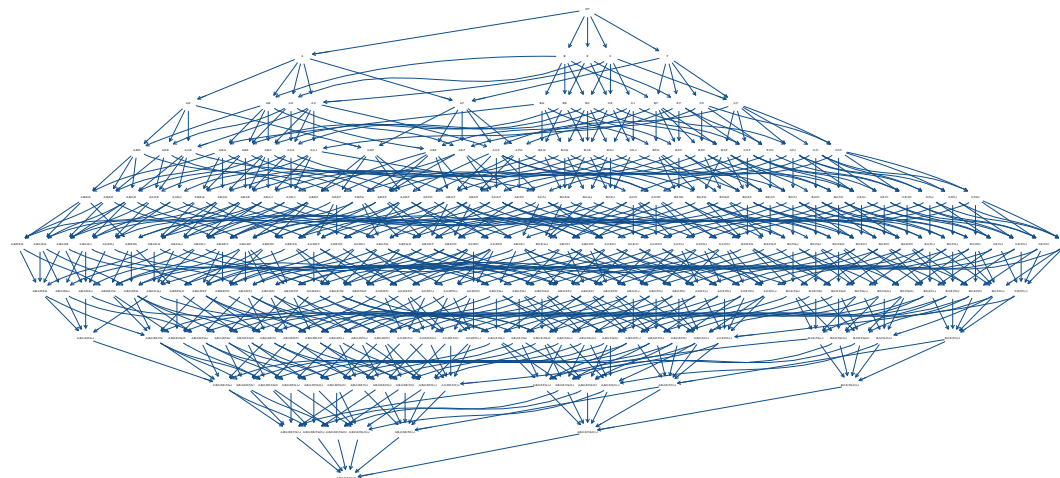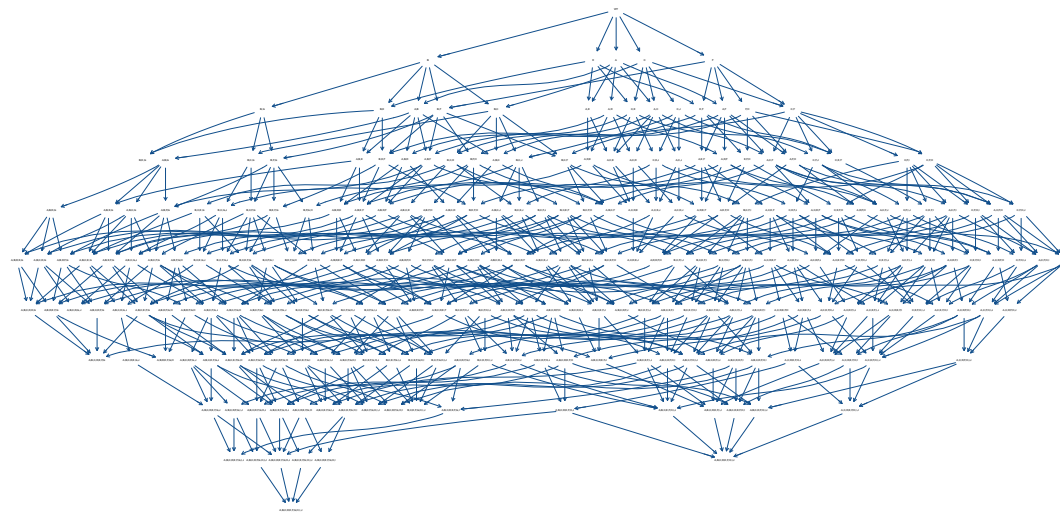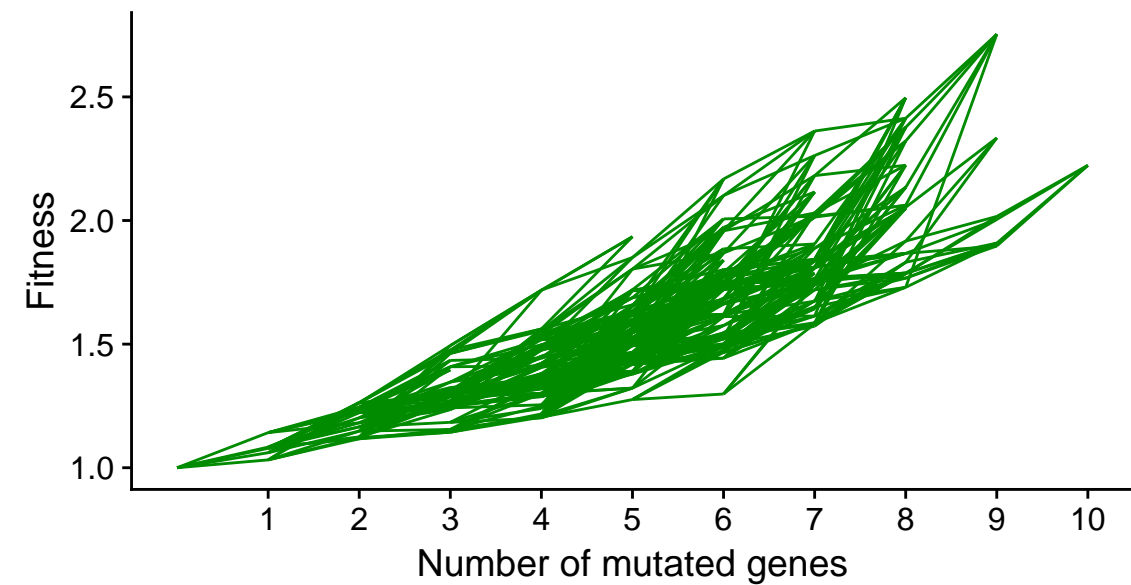

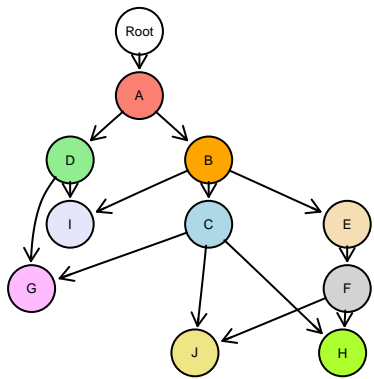

ID **BoCaqtWu6XR9fw10u**  
 acc genotypes **42**  
 peaks no back **9**  
 removed edges **20**  
 prop rem edges **0.235**

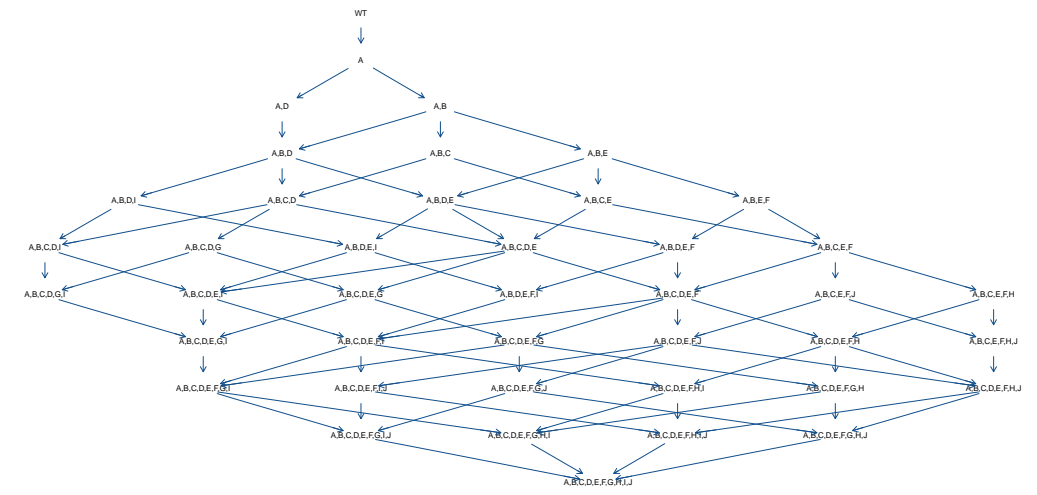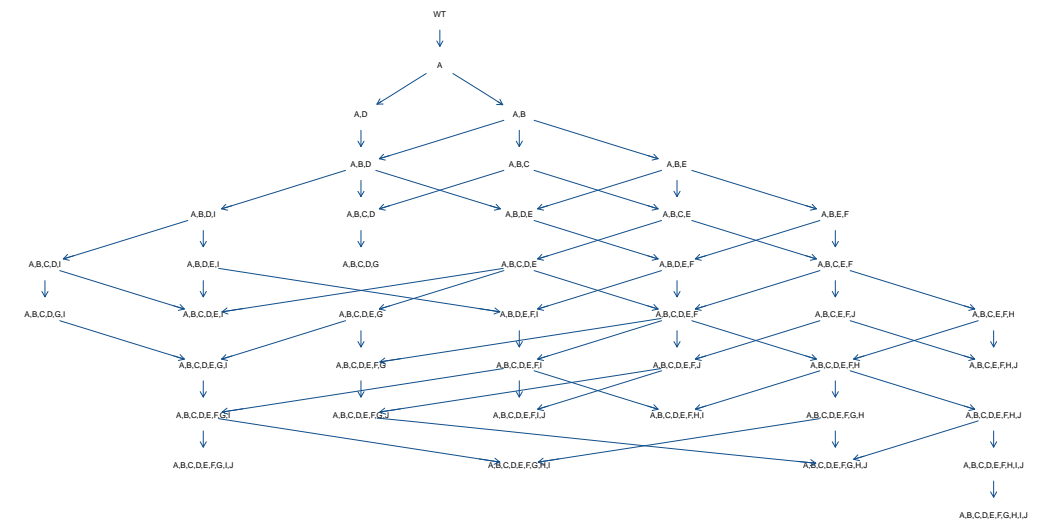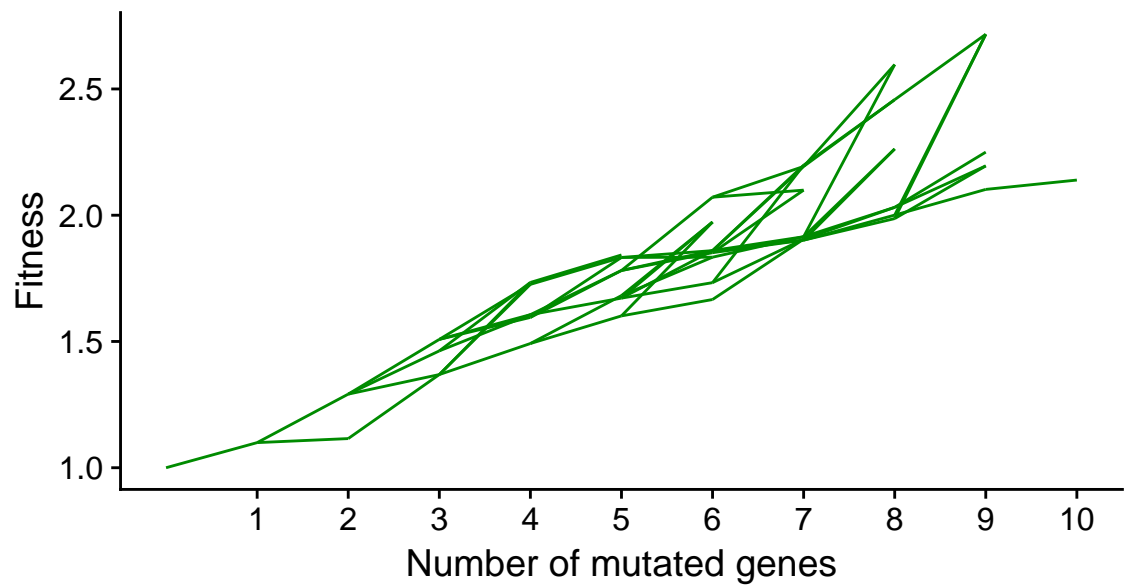

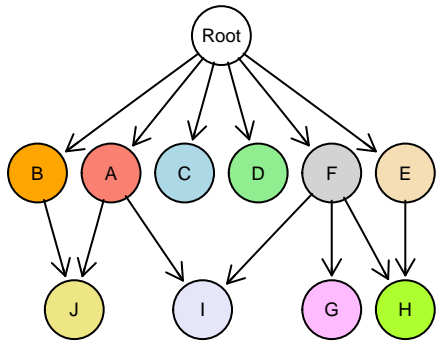

ID **BpzeoBLsEJ3xTD7v**  
 acc genotypes **232**  
 peaks no back **17**  
 removed edges **155**  
 prop rem edges **0.195**

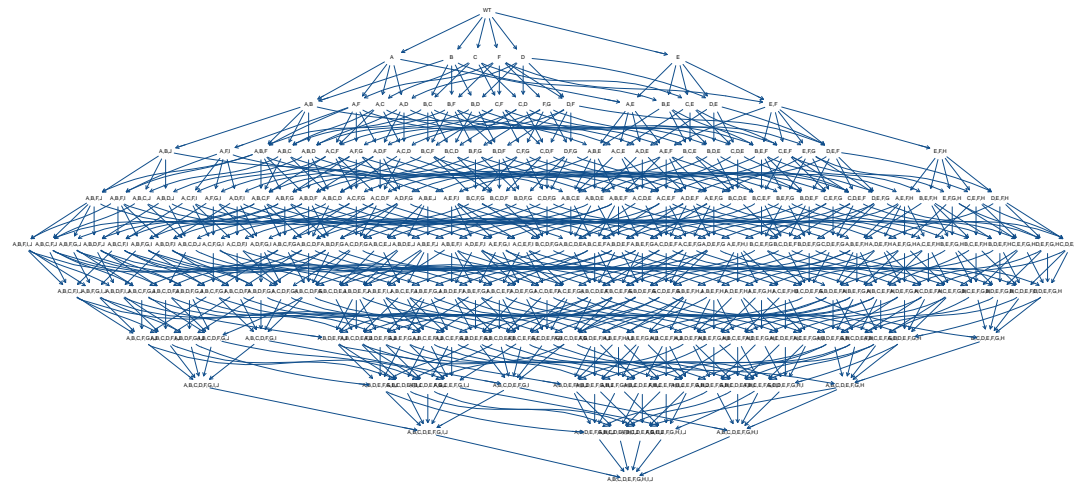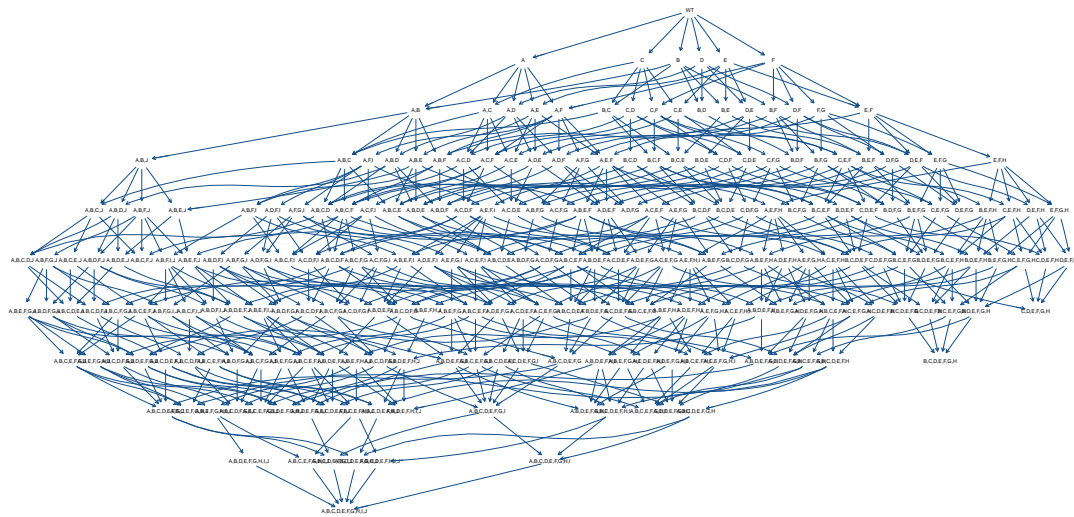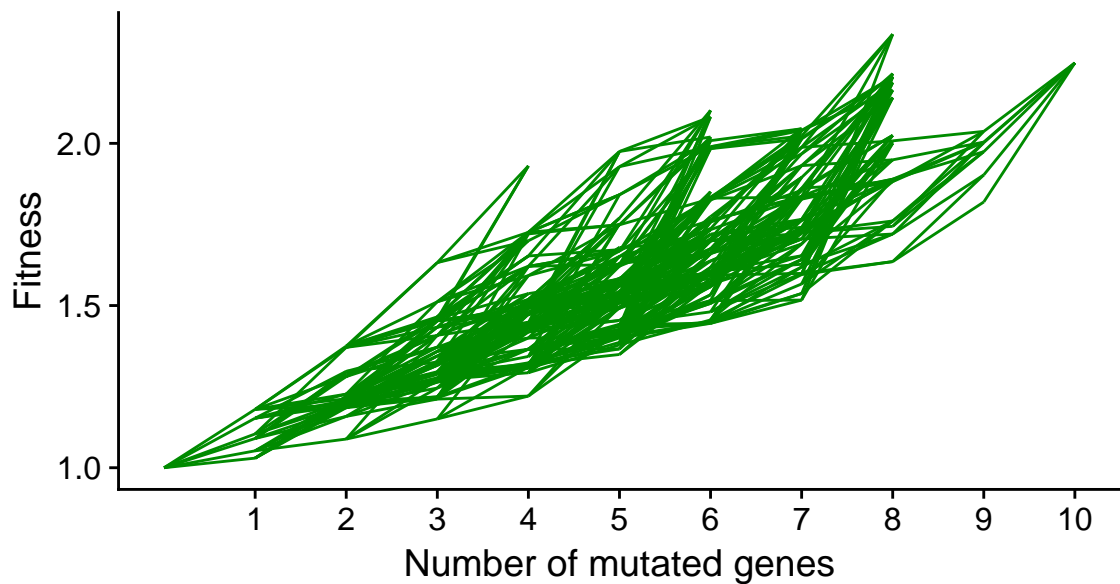



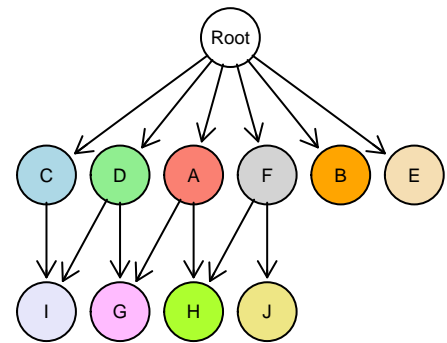

*ID* Bqkt5YbsNE7niJz9  
*acc genotypes* 220  
*peaks no back* 19  
*removed edges* 183  
*prop rem edges* 0.247

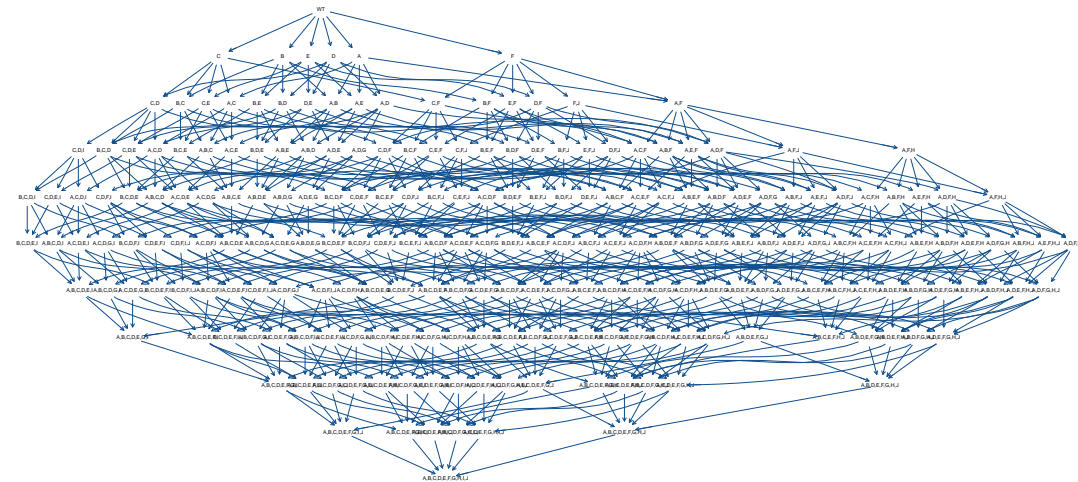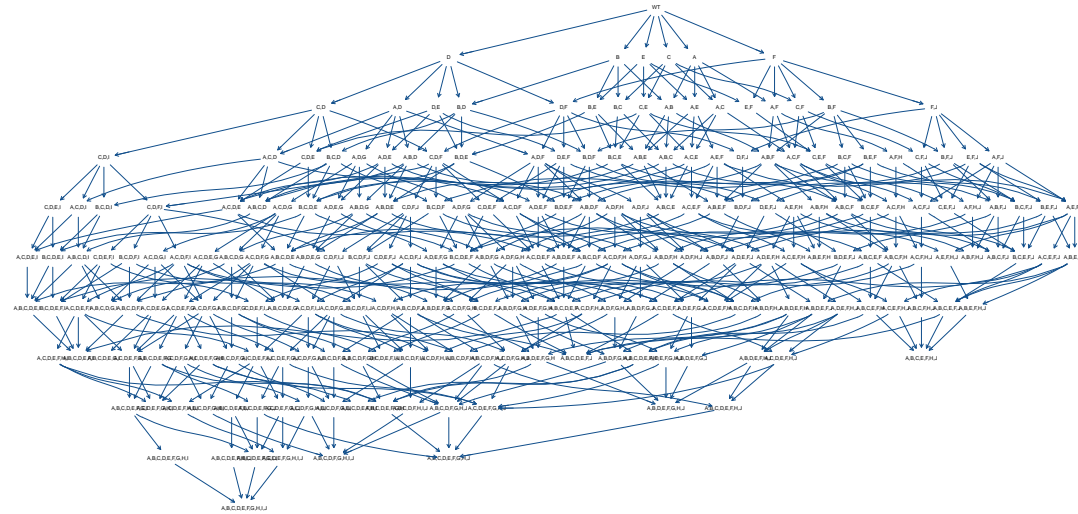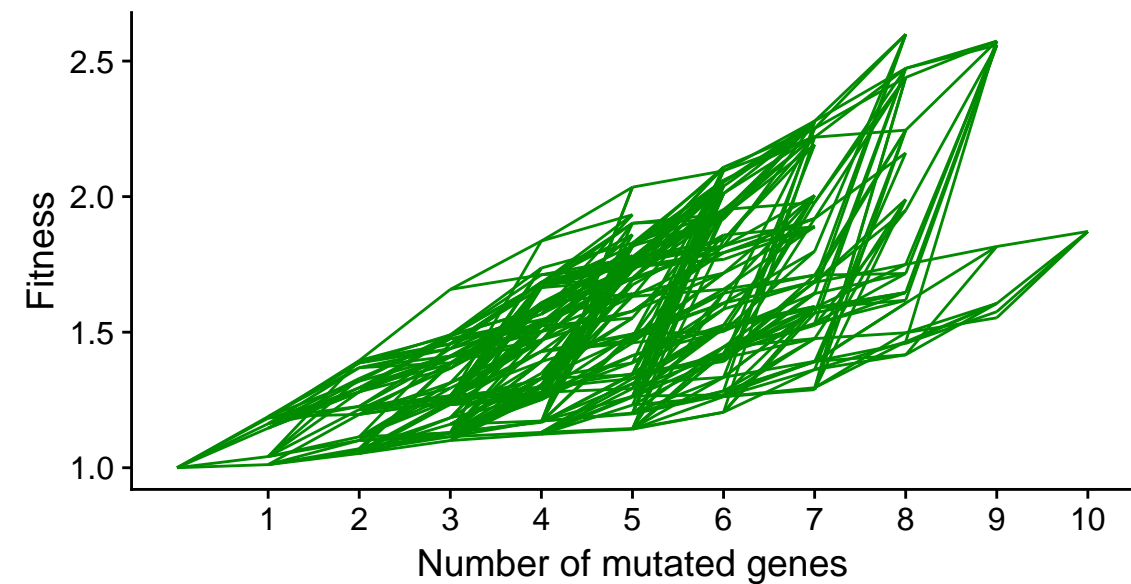

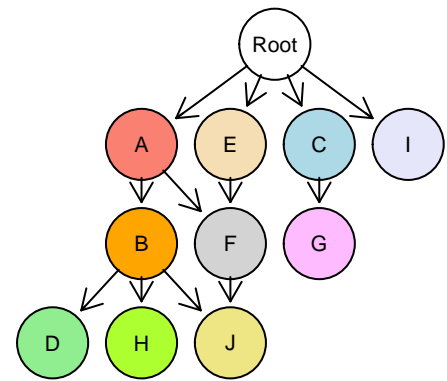

ID **c10jy6210kvQdZBVg**  
 acc genotypes **126**  
 peaks no back **16**  
 removed edges **70**  
 prop rem edges **0.193**

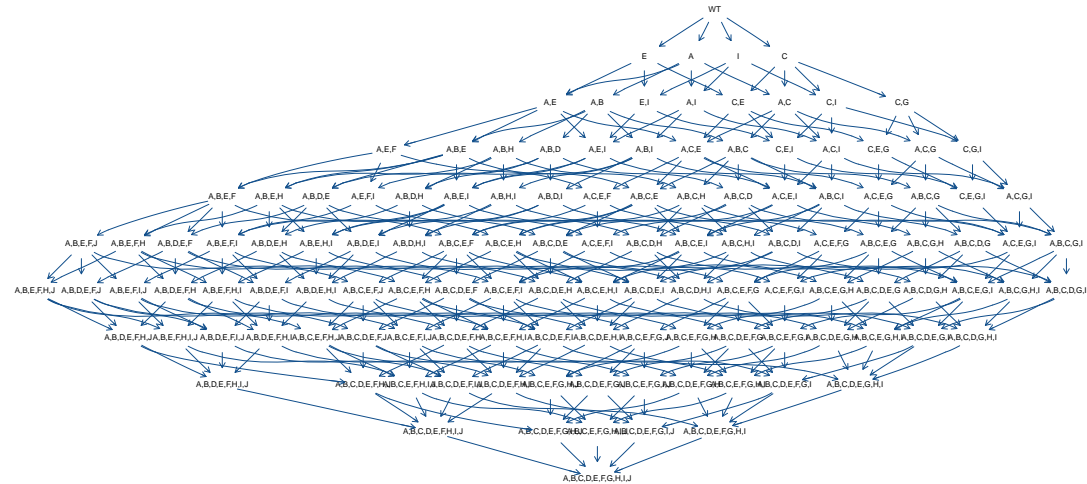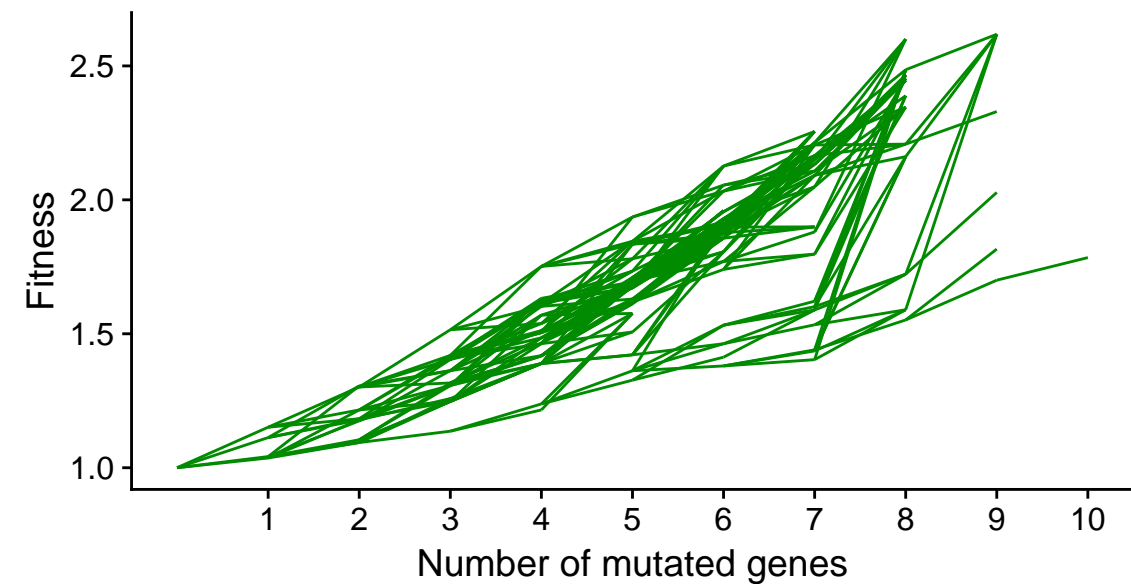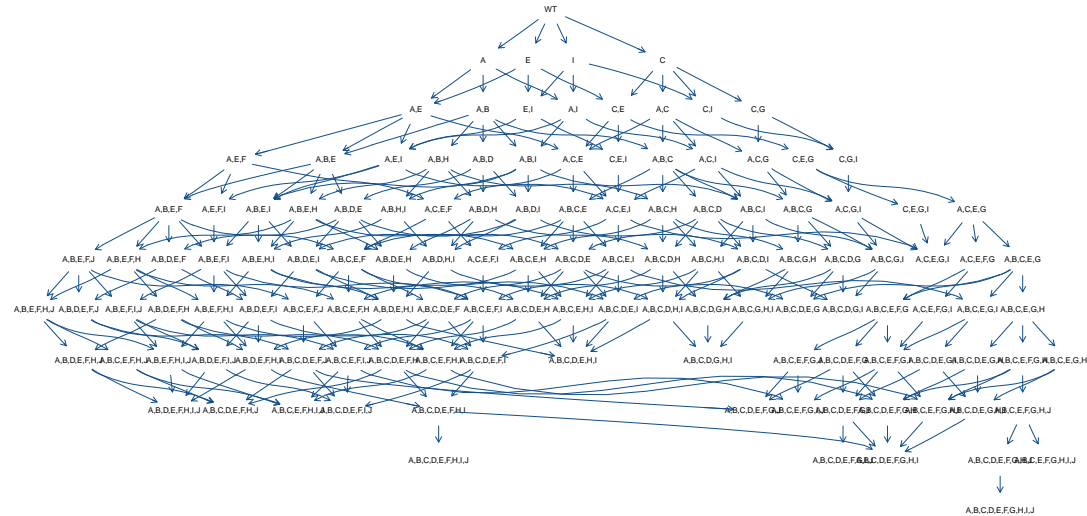

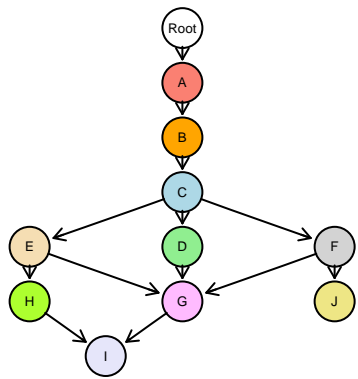

ID C4drUyloTXoBU6JC  
 acc genotypes 27  
 peaks no back 4  
 removed edges 9  
 prop rem edges 0.191

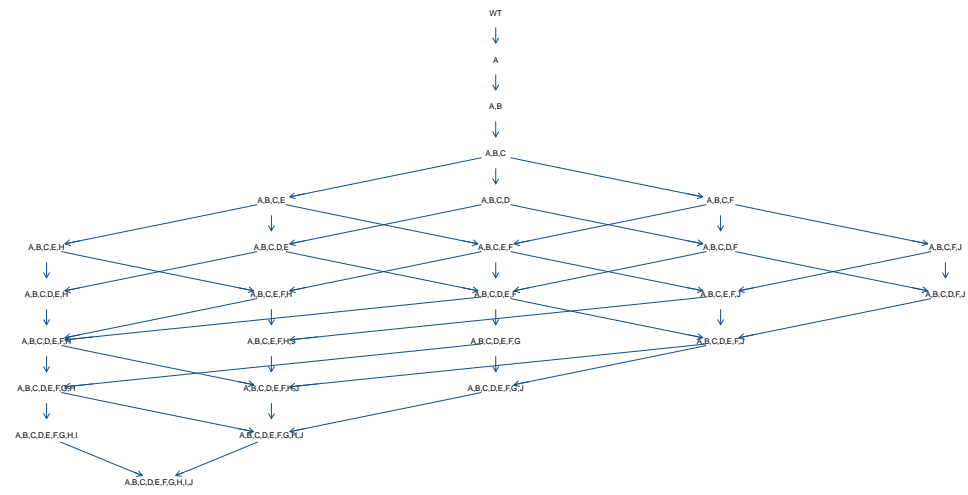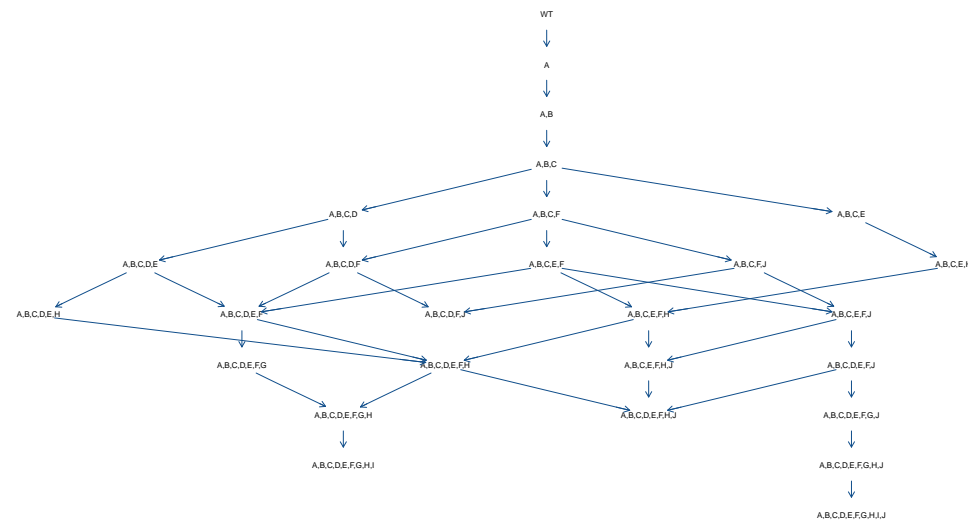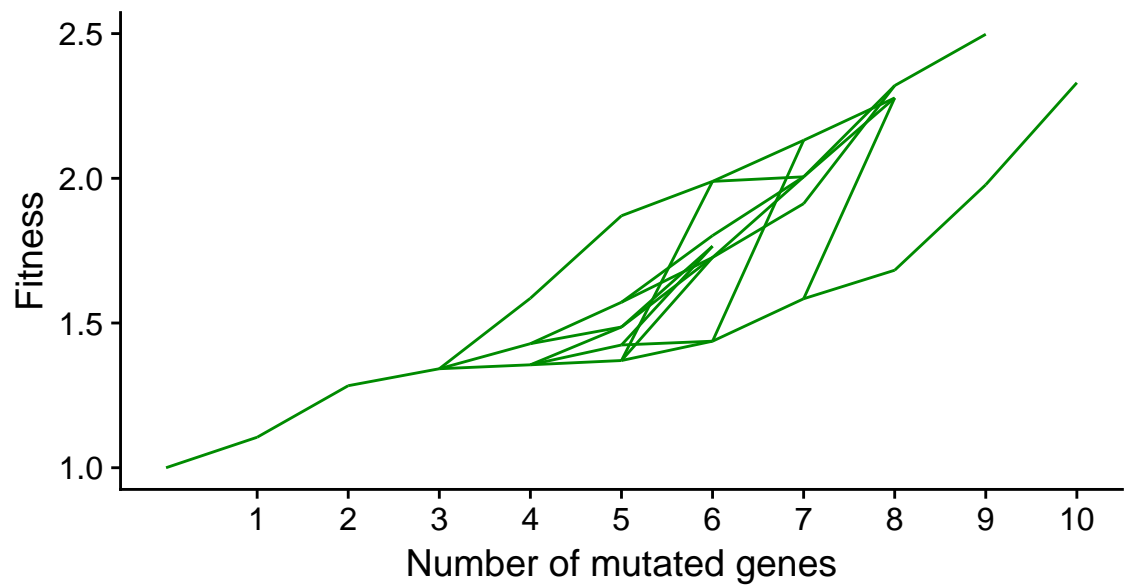

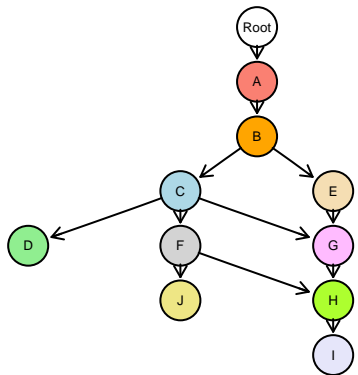

*ID* CDprcl8u4ZcaFn7F  
*acc genotypes* 30  
*peaks no back* 4  
*removed edges* 6  
*prop rem edges* 0.111

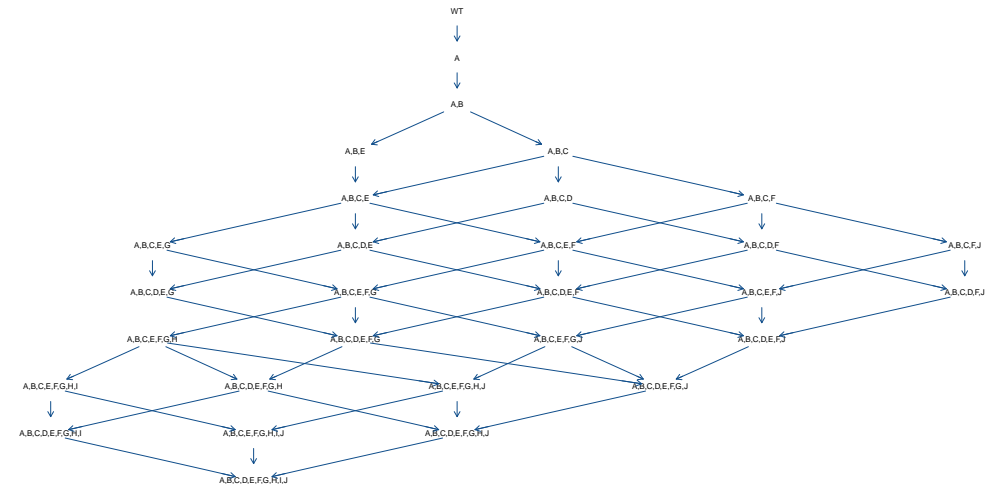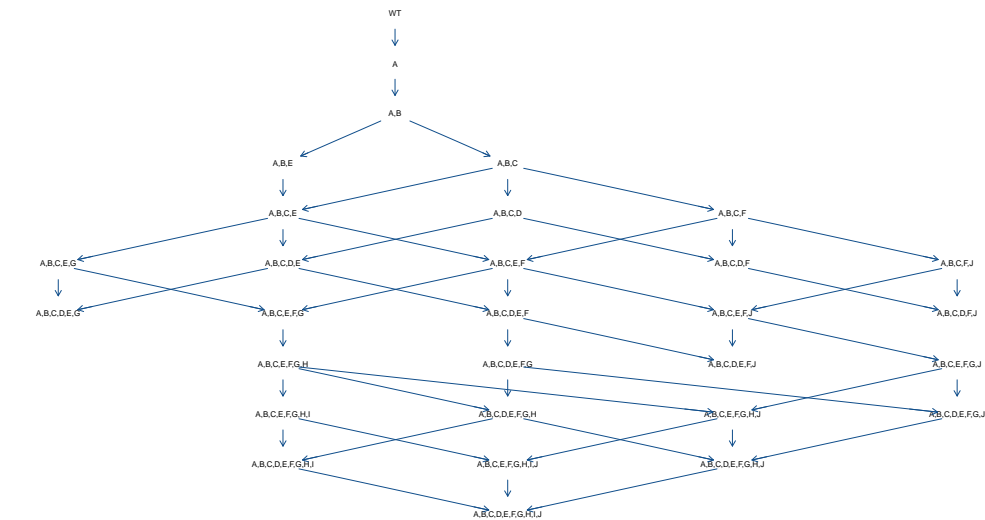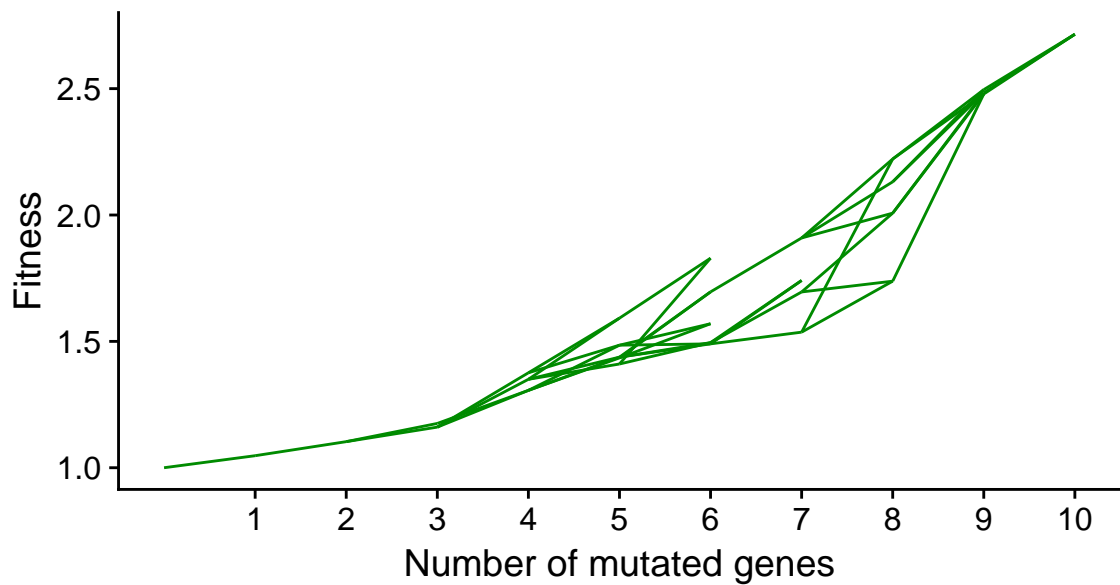

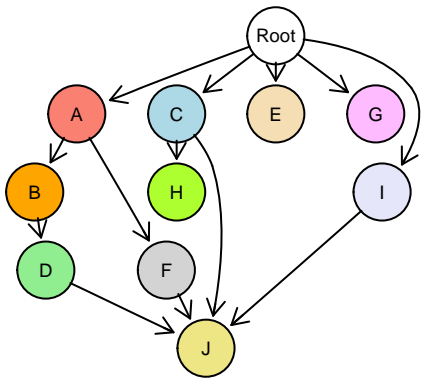

ID **cGm7gRR3s42NqkyP**  
 acc genotypes **176**  
 peaks no back **16**  
 removed edges **116**  
 prop rem edges **0.201**

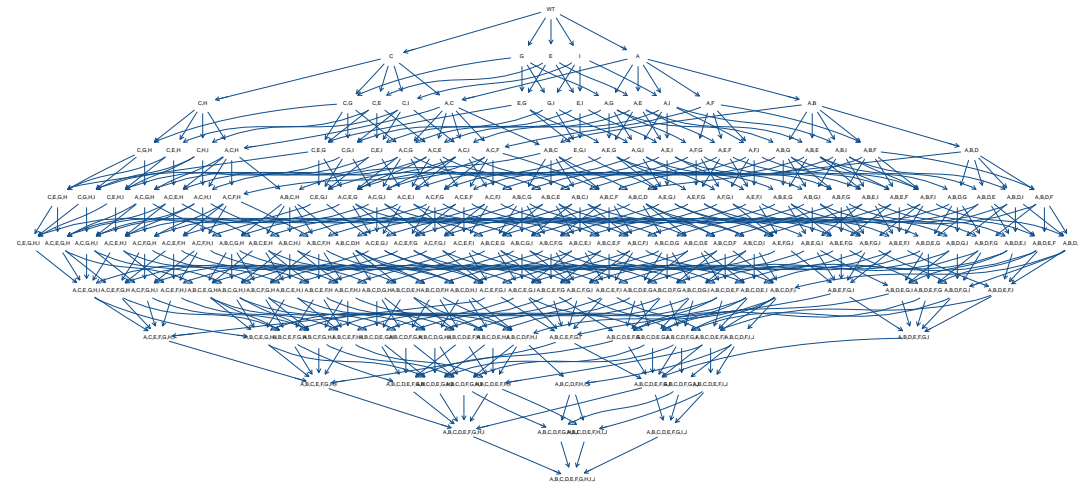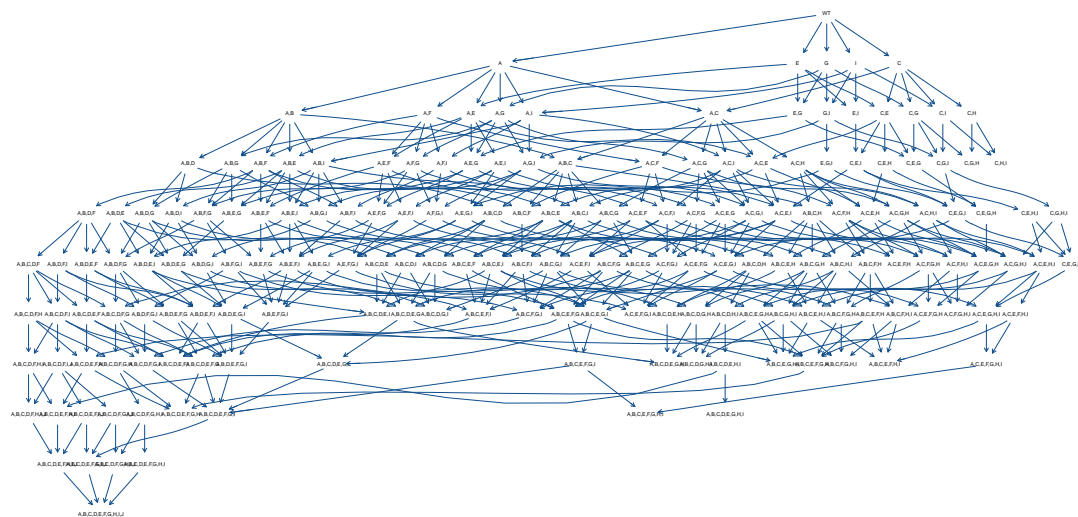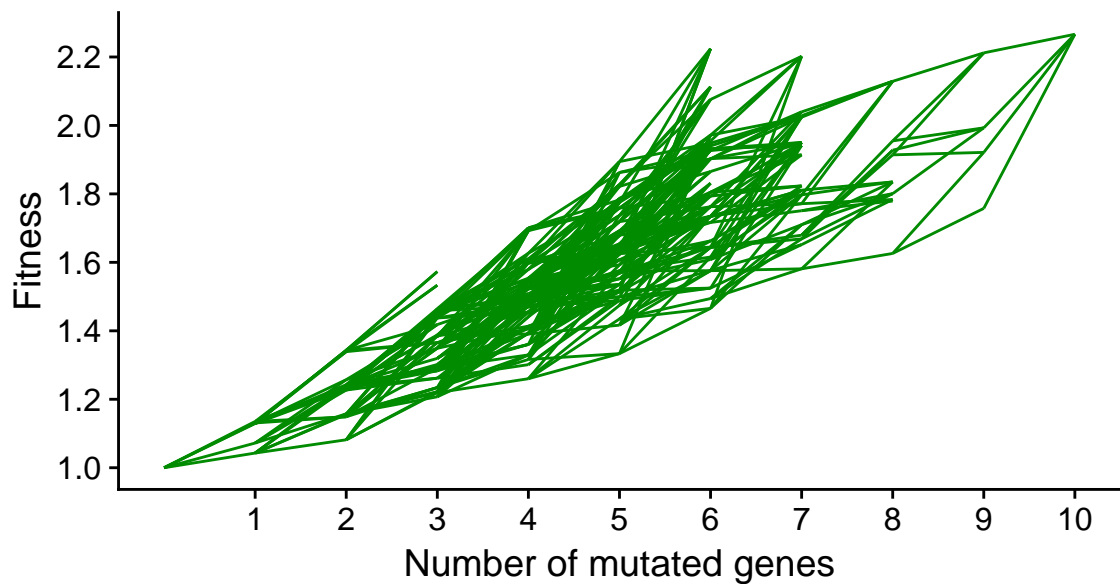

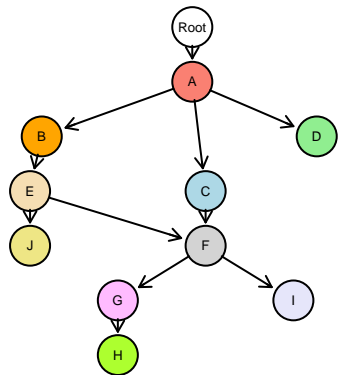

ID CjDx5CPhar7wxBYH  
 acc genotypes 41  
 peaks no back 7  
 removed edges 22  
 prop rem edges 0.259

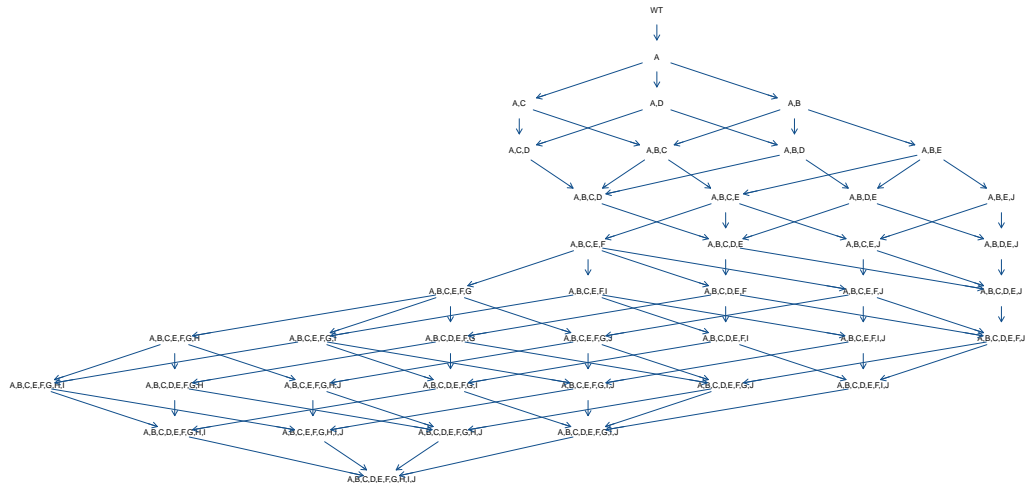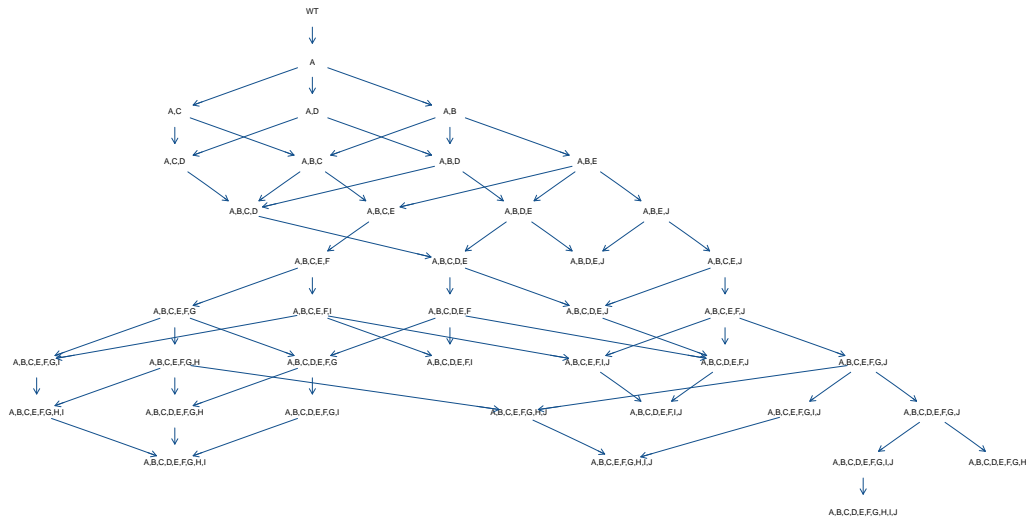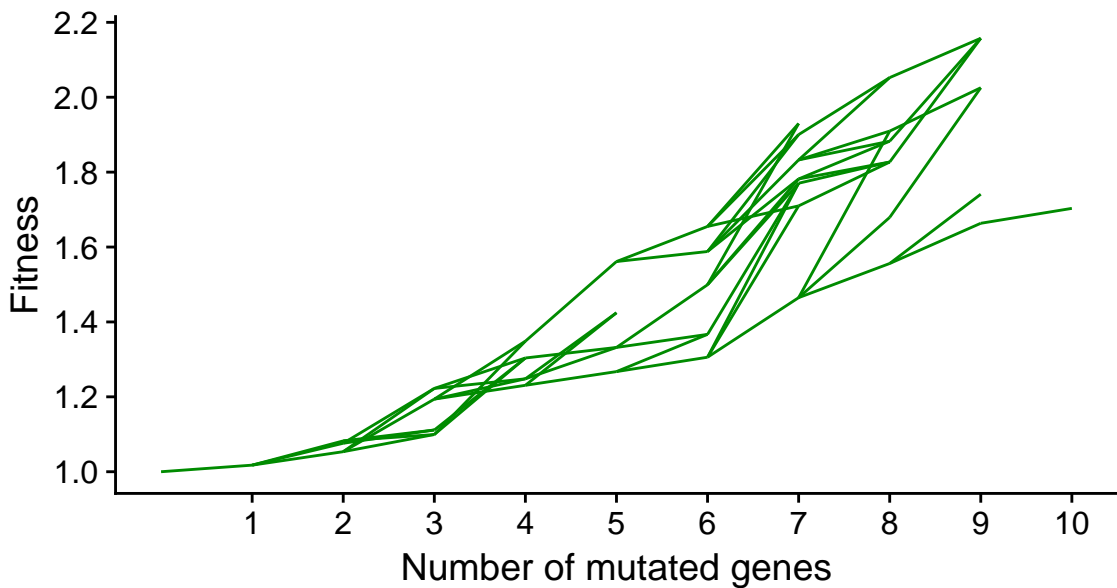

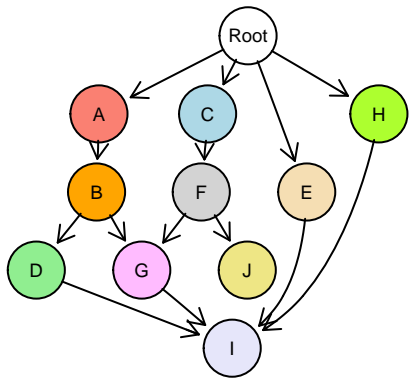

ID [dC6vMuFmbDjoadOo](#)  
 acc genotypes 82  
 peaks no back 10  
 removed edges 39  
 prop rem edges 0.185

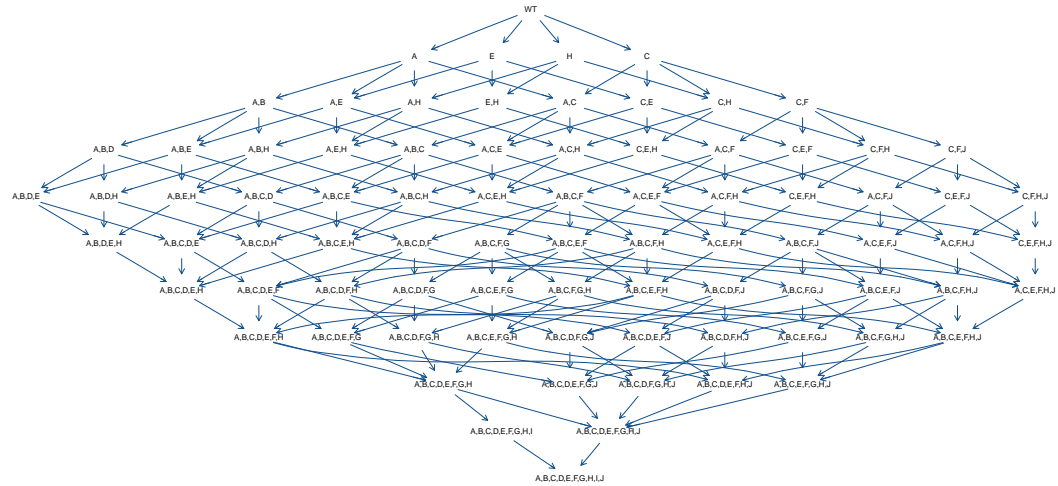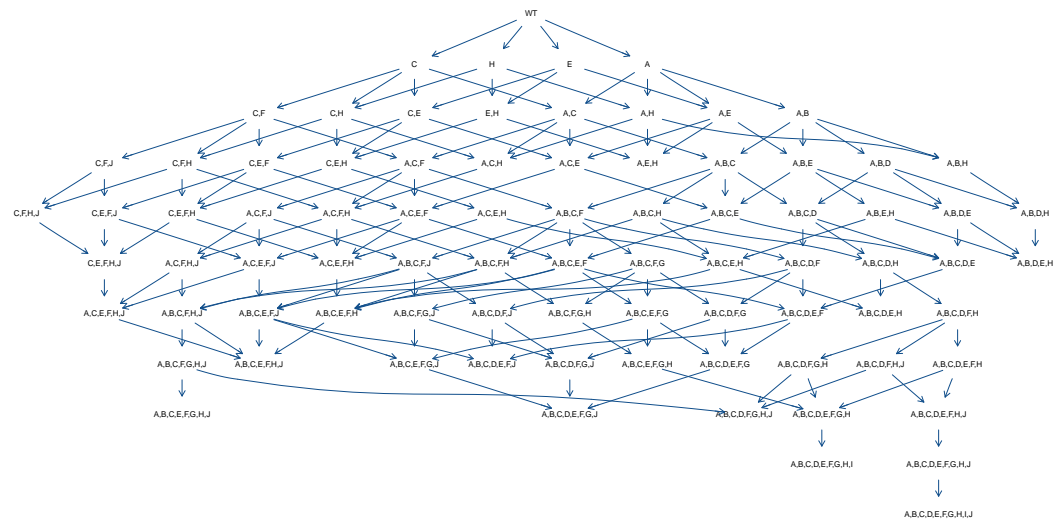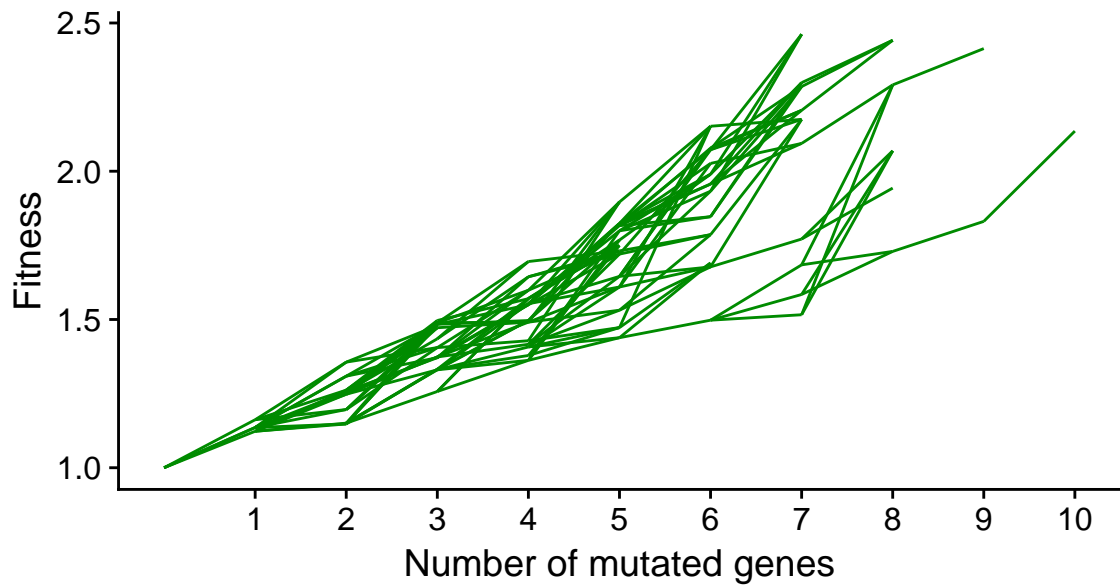

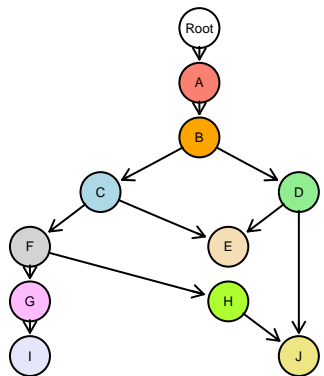

ID **DcAnAY4JLtfHe55I**  
 acc genotypes **31**  
 peaks no back **4**  
 removed edges **8**  
 prop rem edges **0.143**

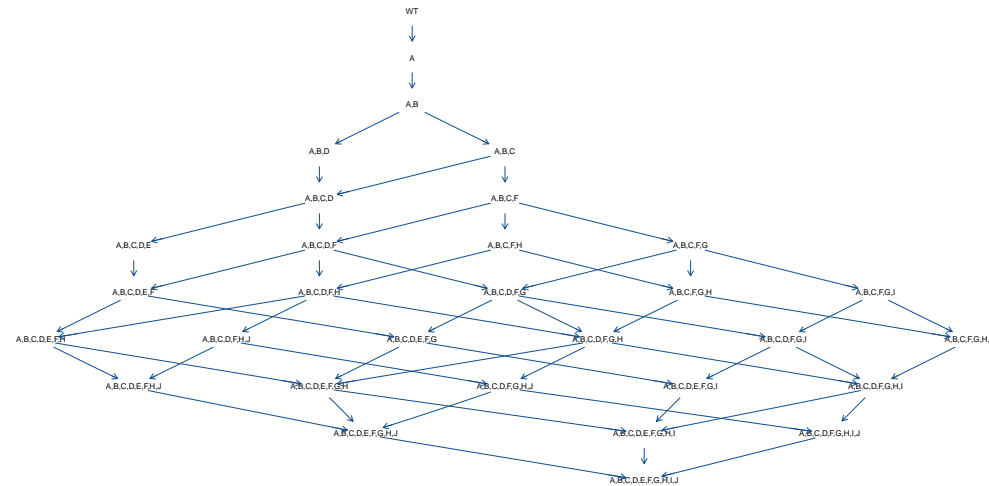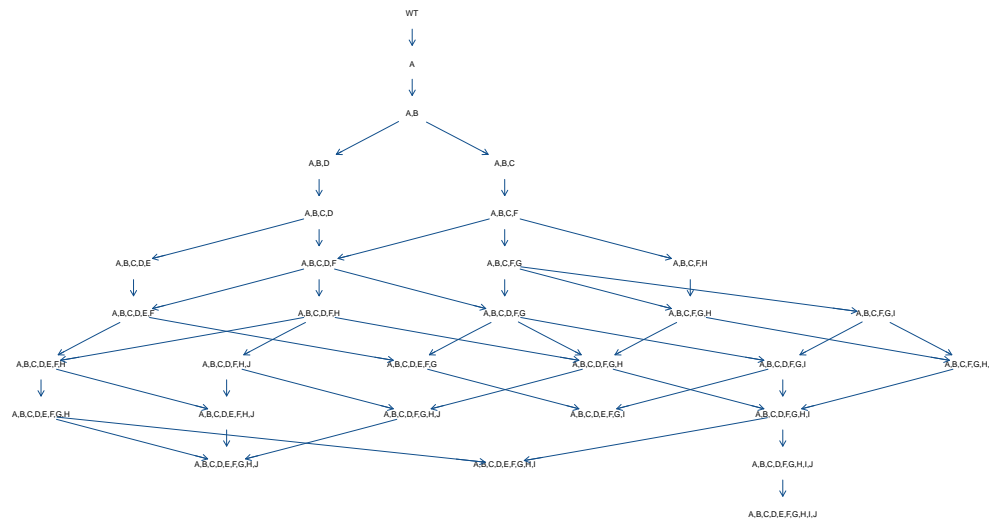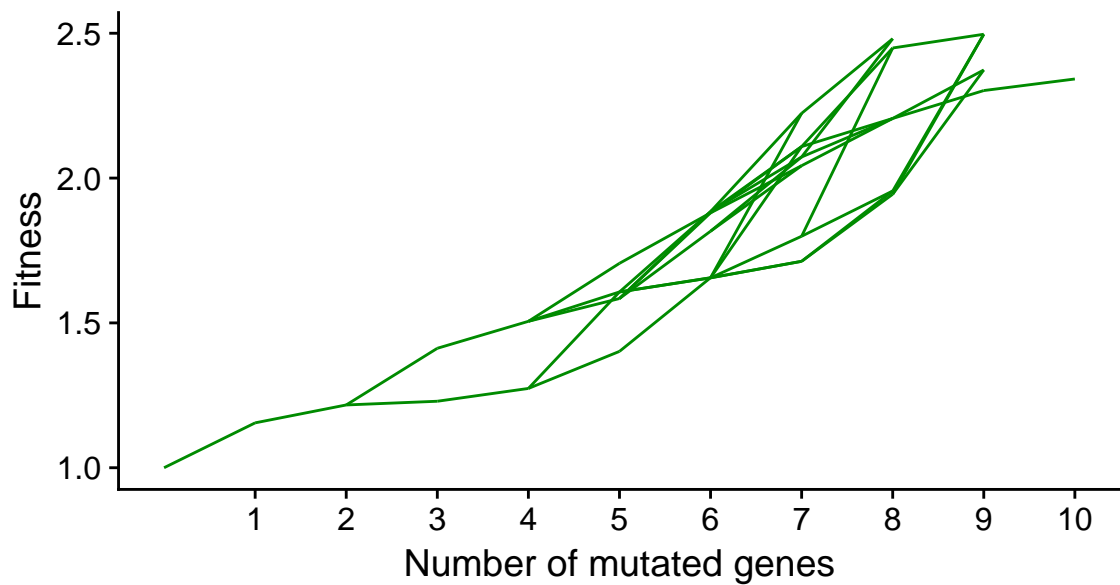



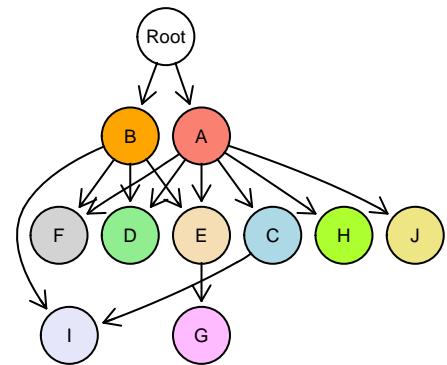

ID **dDZ4CvpAmrvxLFyS**  
 acc genotypes **154**  
 peaks no back **13**  
 removed edges **111**  
 prop rem edges **0.221**

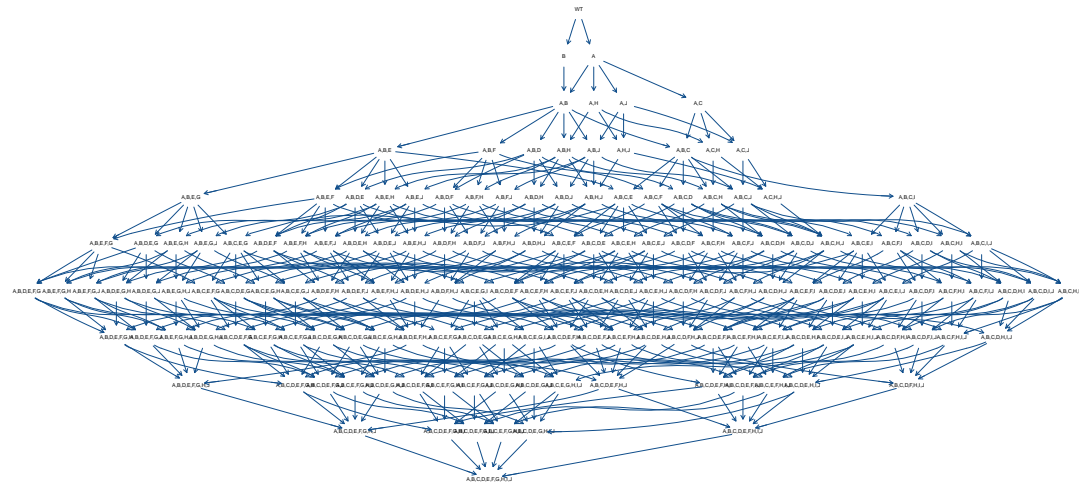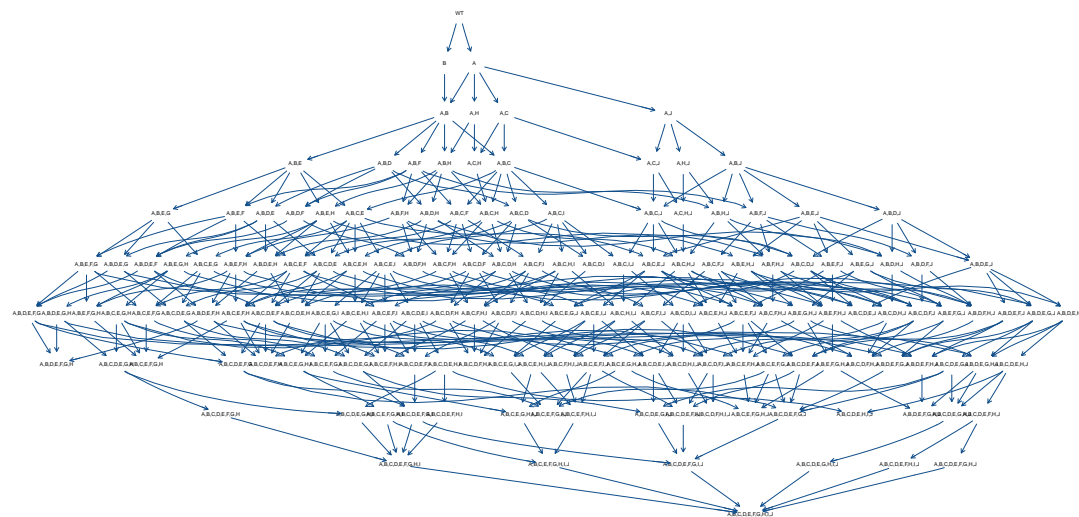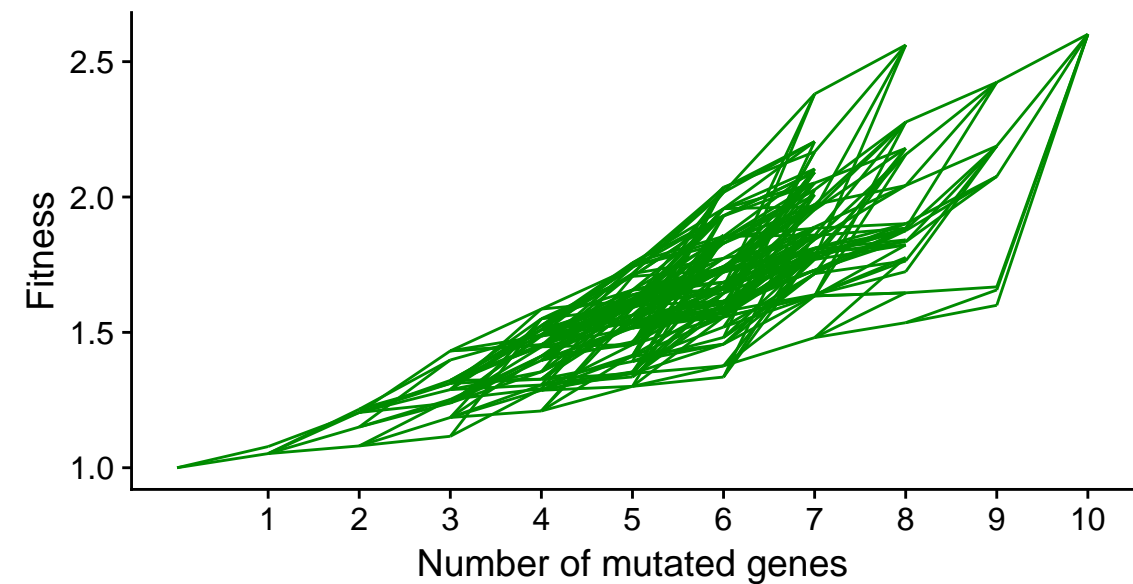

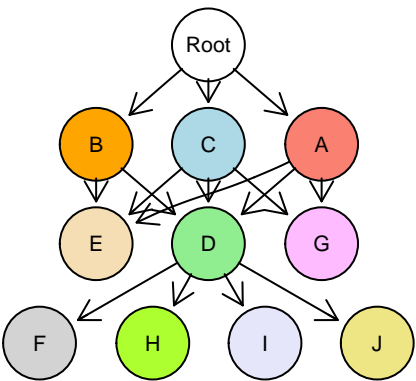

ID **DFTK3ko7MizoABxk**  
 acc genotypes **76**  
 peaks no back **9**  
 removed edges **40**  
 prop rem edges **0.187**

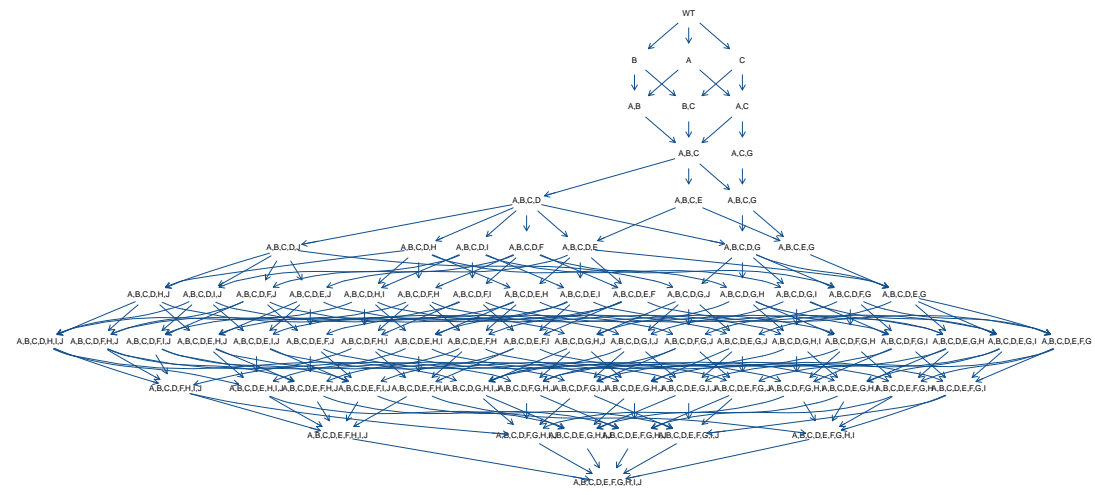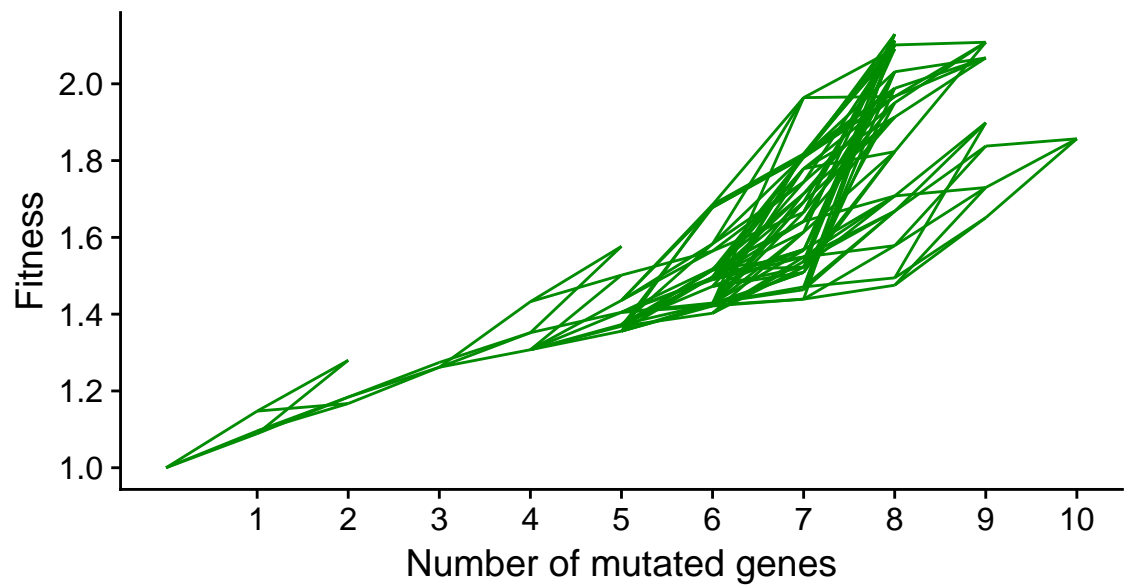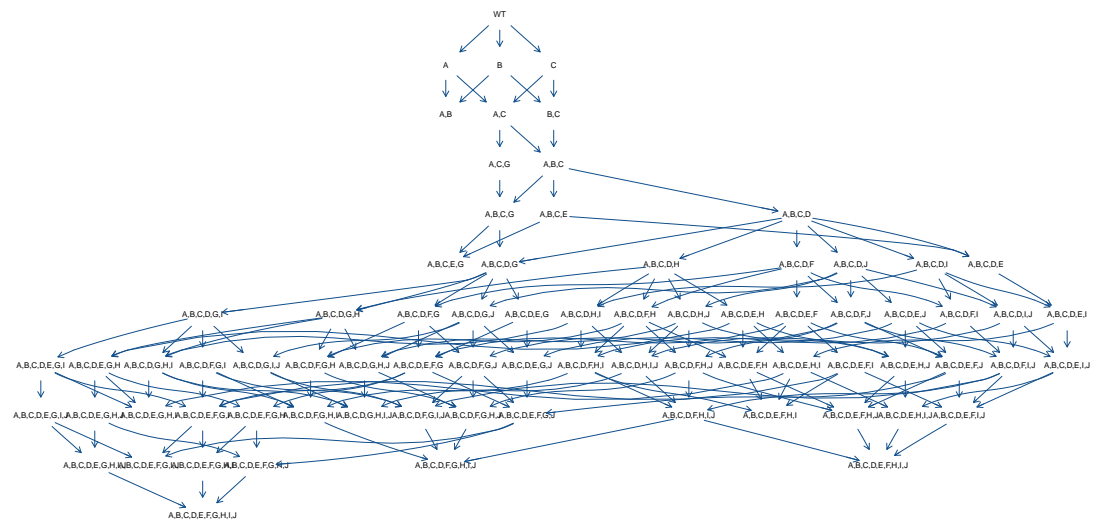

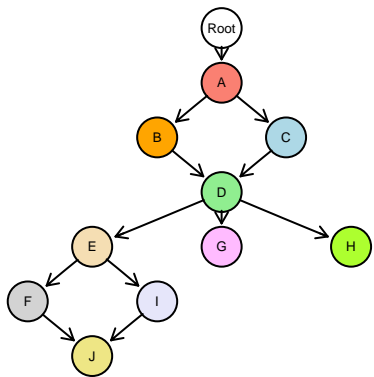

ID **DXTB5tpZMuV2IF2I**  
 acc genotypes **29**  
 peaks no back **5**  
 removed edges **8**  
 prop rem edges **0.148**

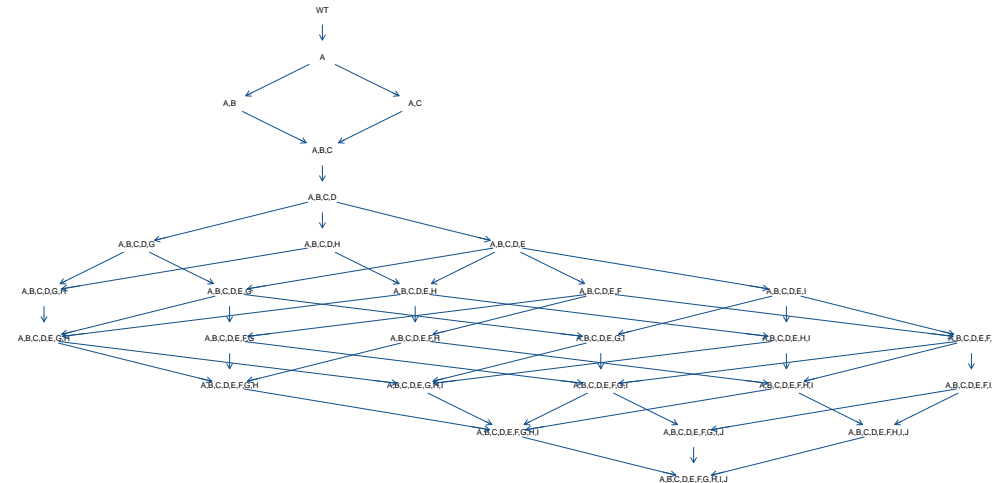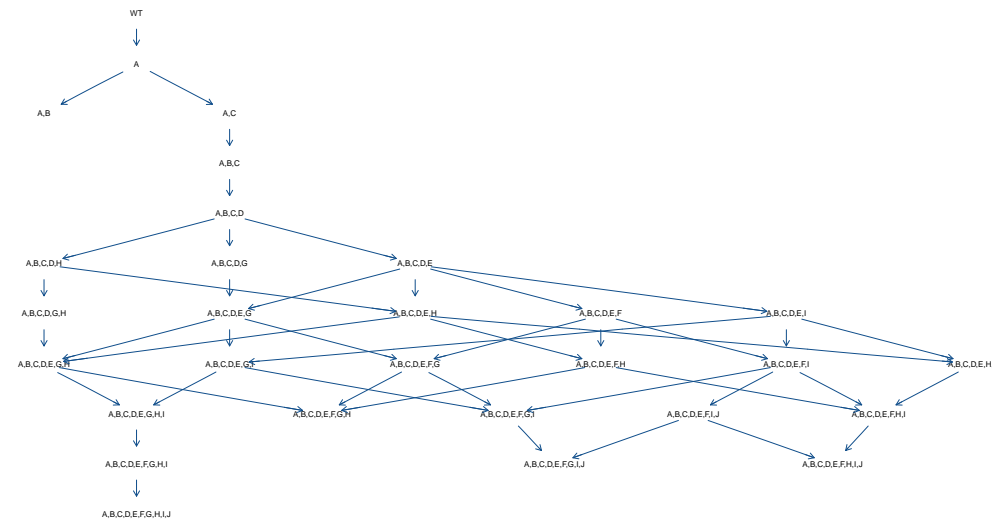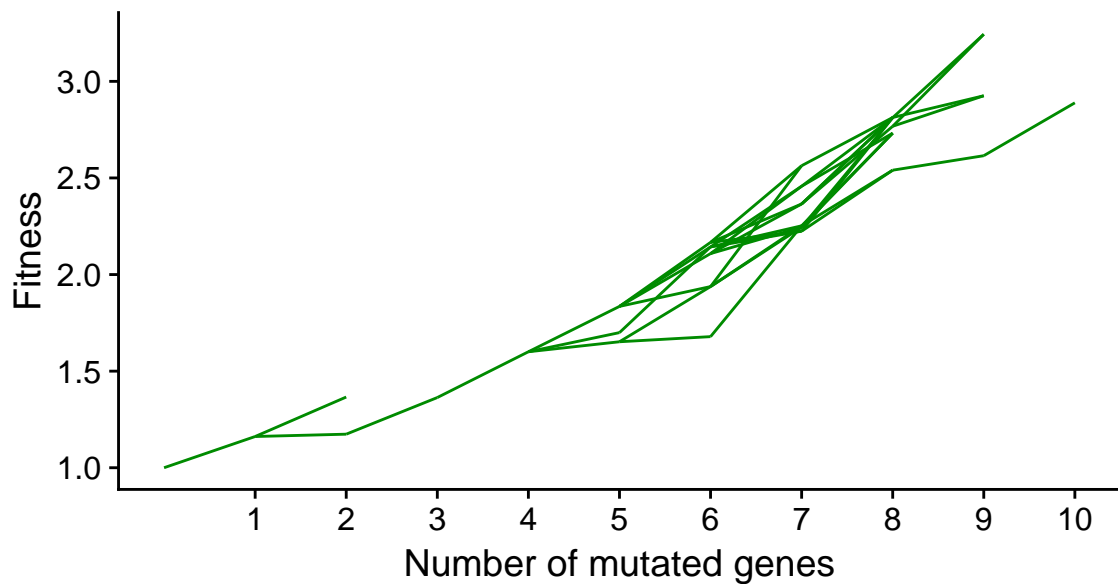

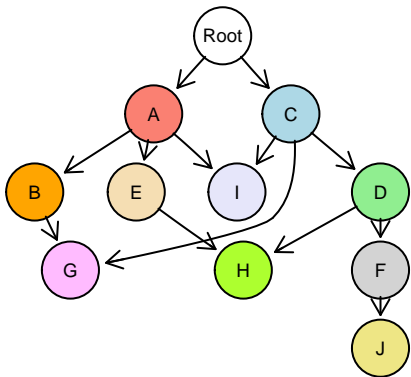

ID **dYeC4QsDciy4hwa3**  
 acc genotypes **75**  
 peaks no back **10**  
 removed edges **32**  
 prop rem edges **0.174**

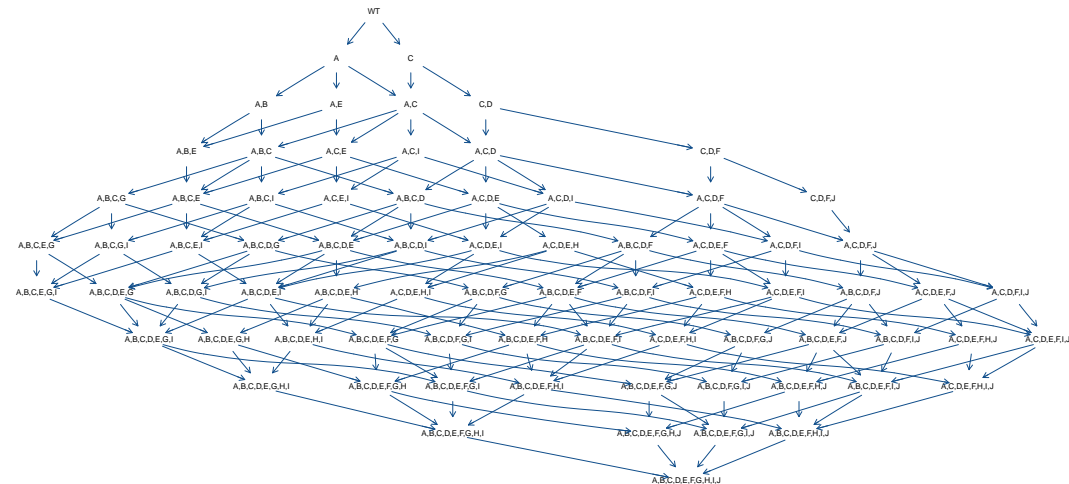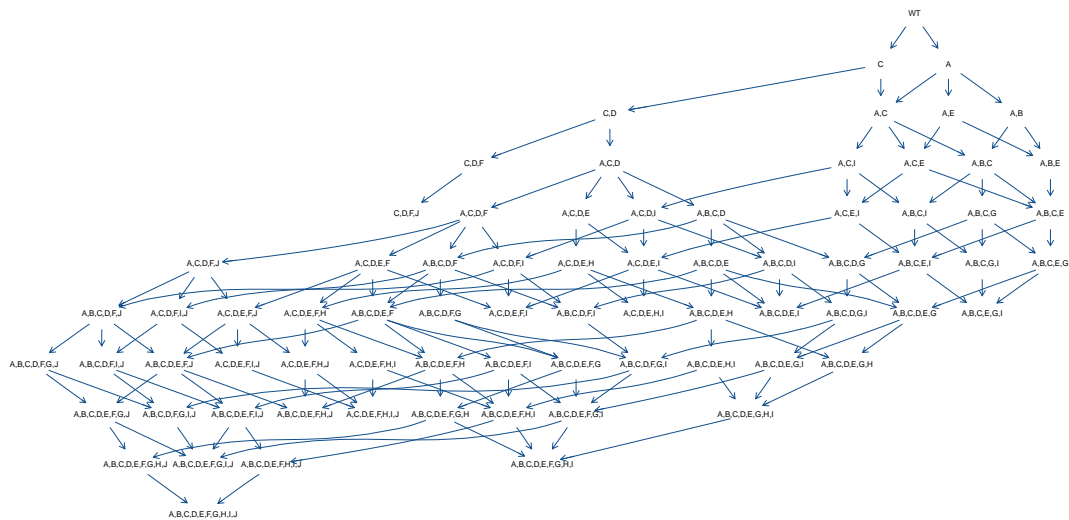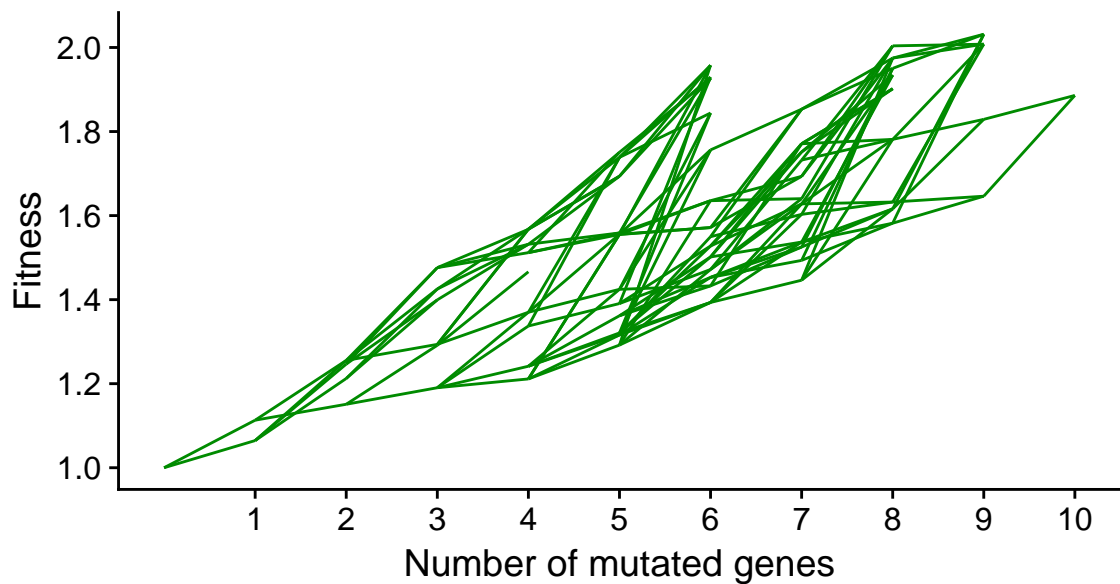

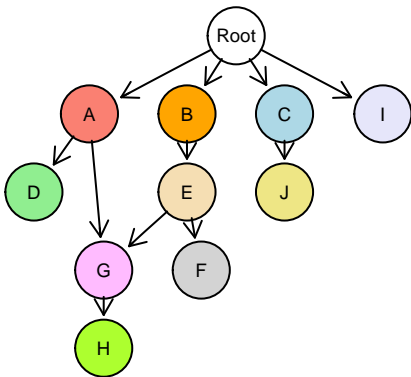

*ID* E8p8hmTg4KHAS8DL  
*acc genotypes* 120  
*peaks no back* 12  
*removed edges* 61  
*prop rem edges* 0.18

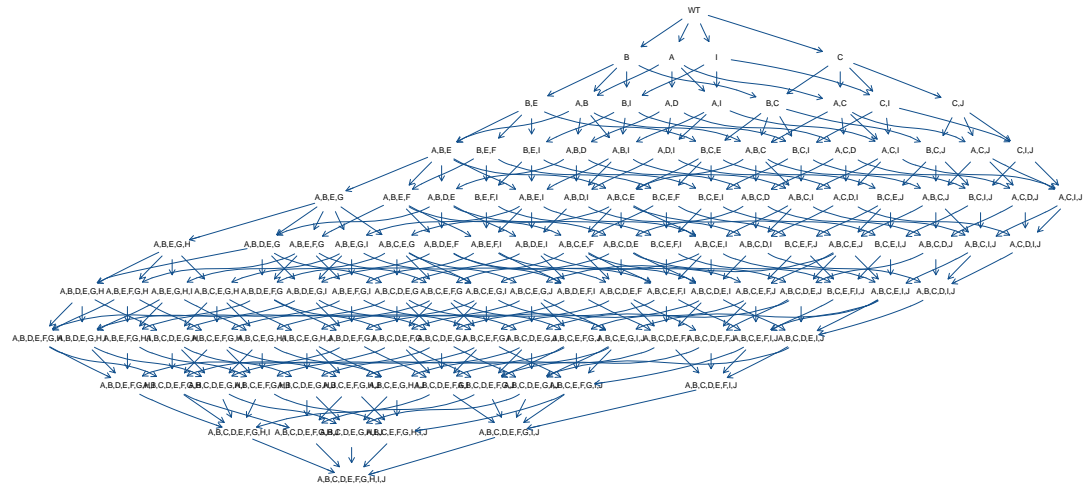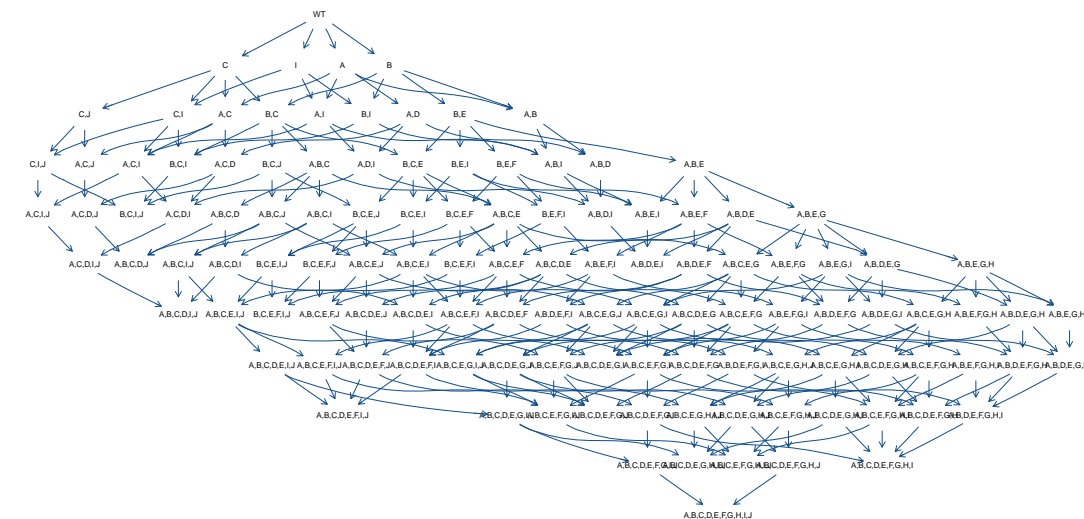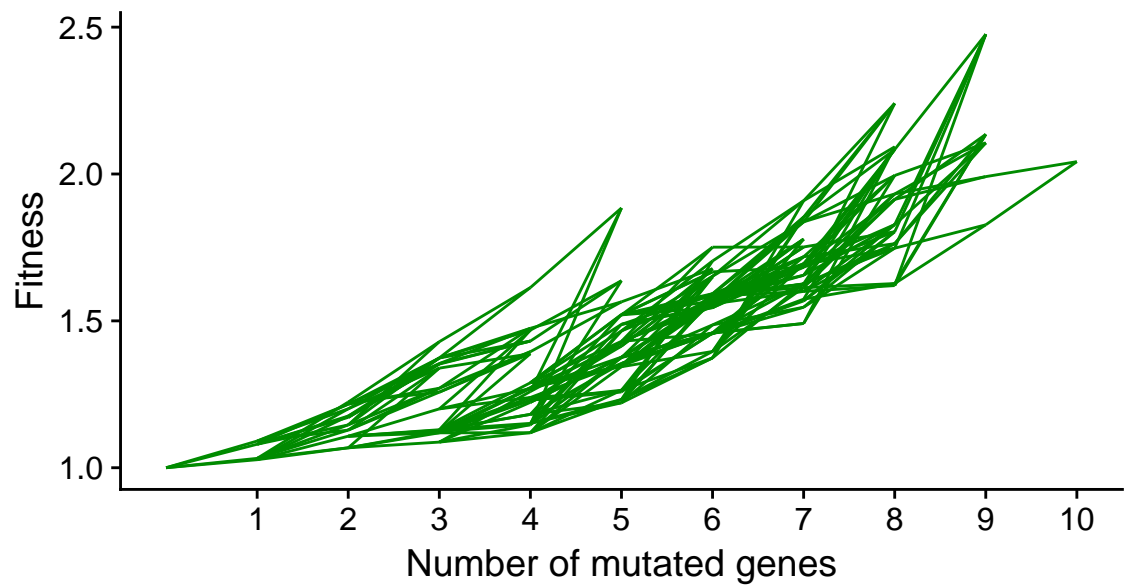

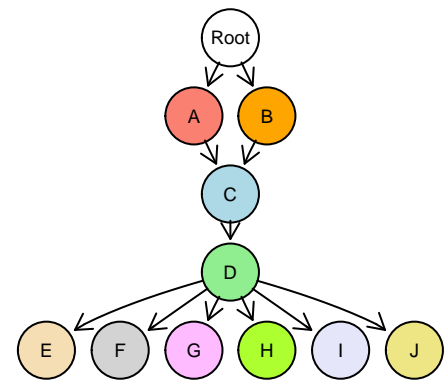

*ID* eBeyysHajtLINILT  
*acc genotypes* 69  
*peaks no back* 8  
*removed edges* 35  
*prop rem edges* 0.177

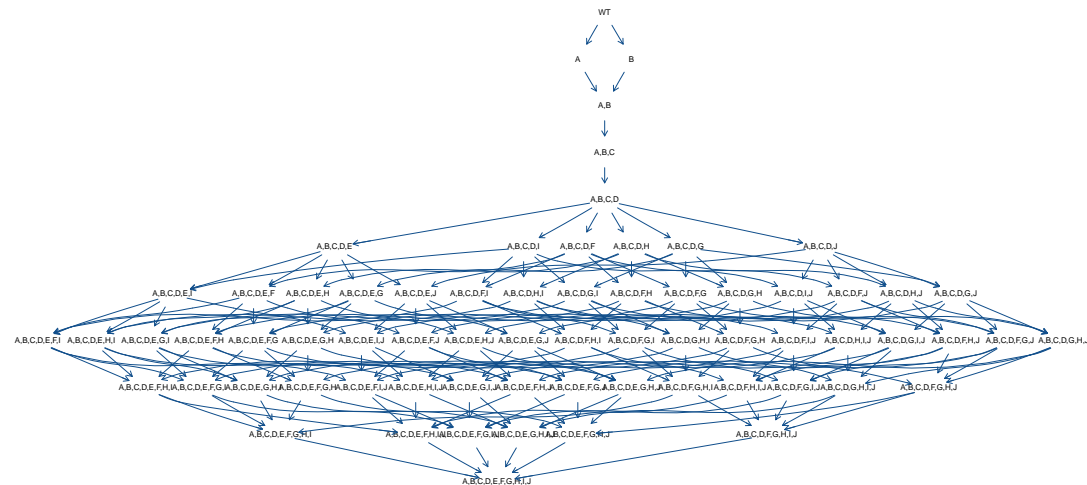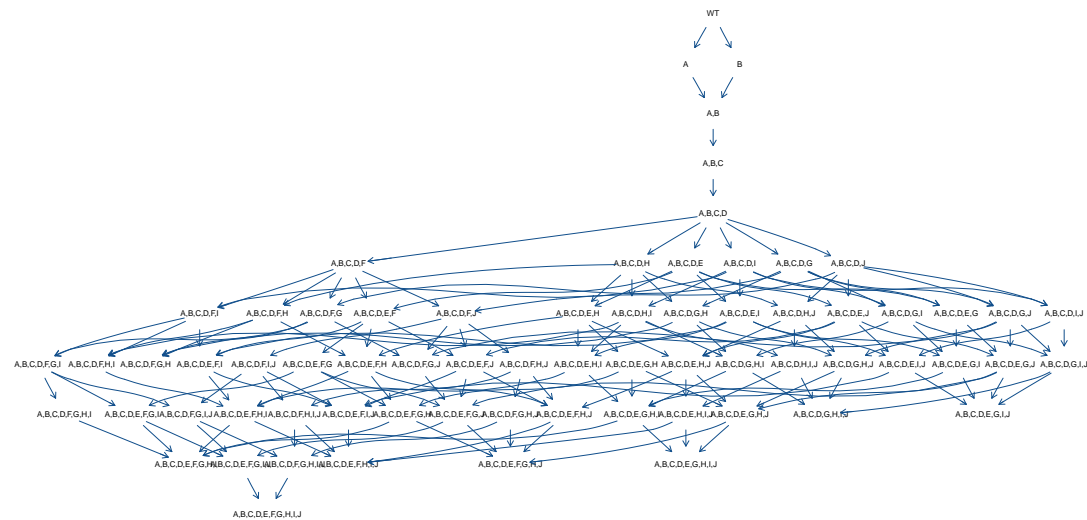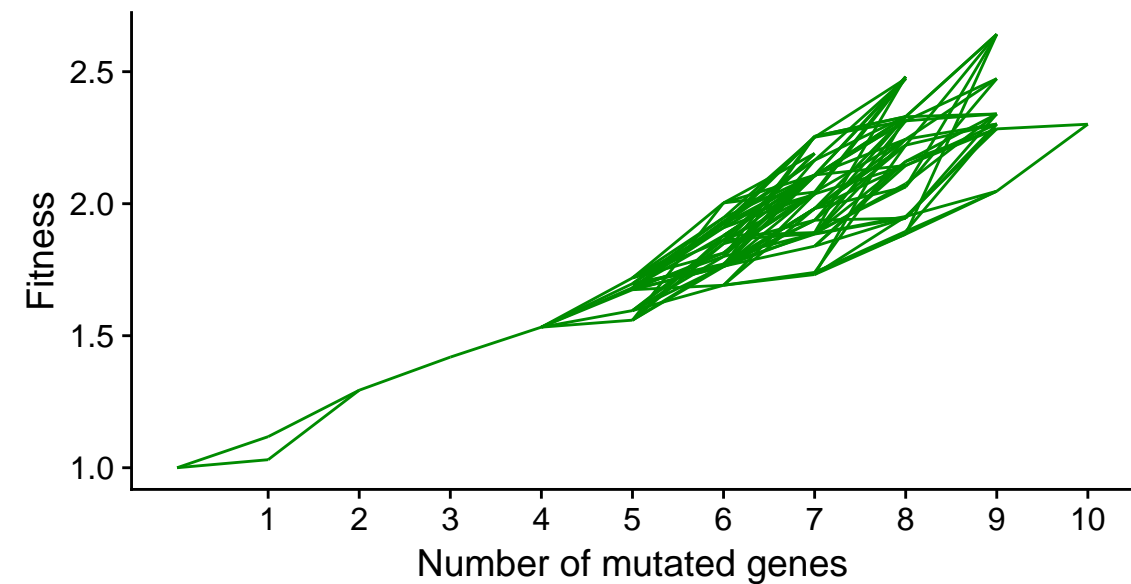

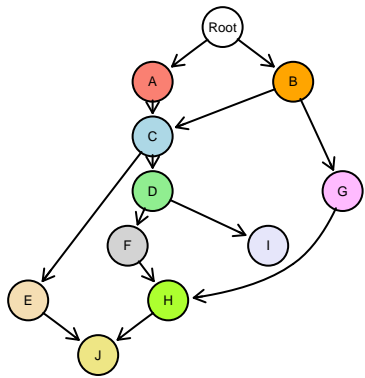

ID **EflrY474a8aE1bD2**  
 acc genotypes **32**  
 peaks no back **5**  
 removed edges **8**  
 prop rem edges **0.133**

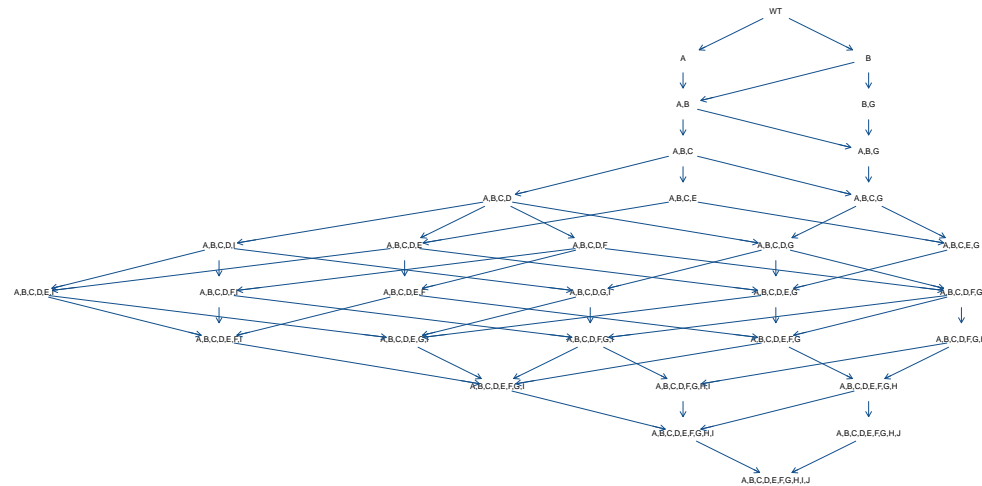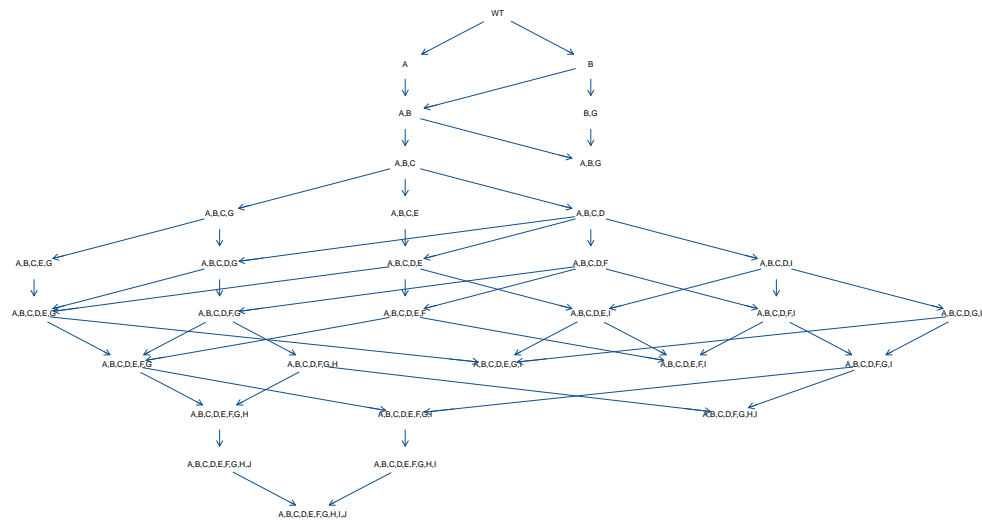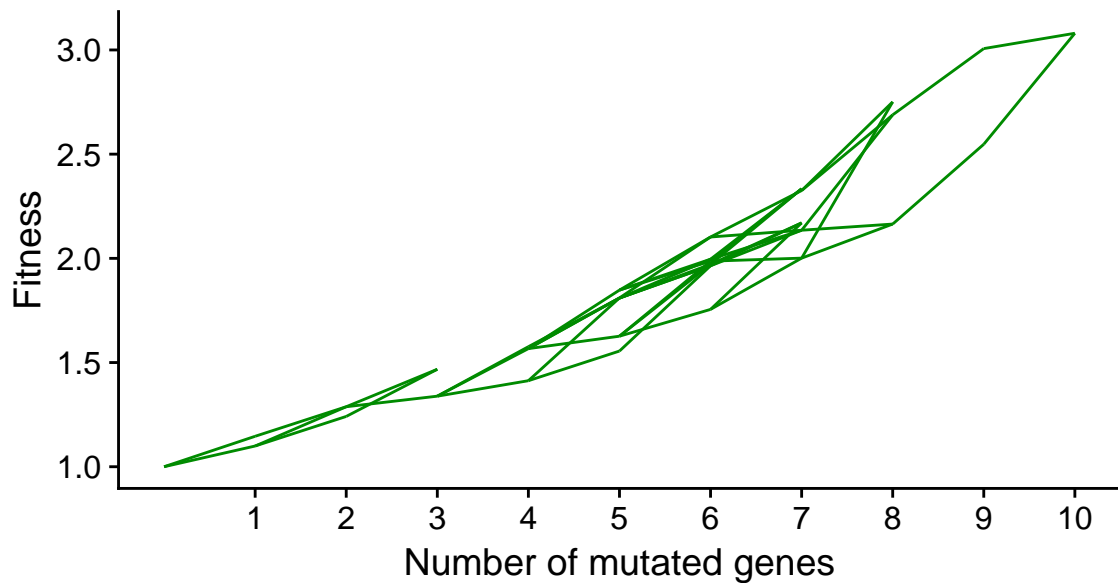

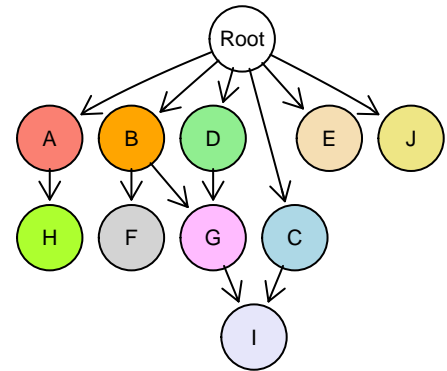

*ID* EjeOkmz5yWV10GMyo  
*acc genotypes* 216  
*peaks no back* 14  
*removed edges* 134  
*prop rem edges* 0.183

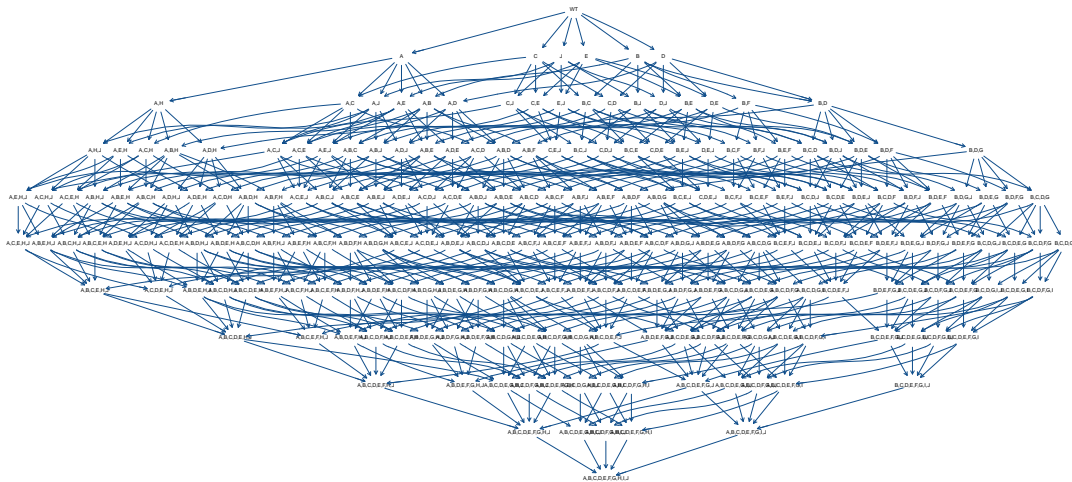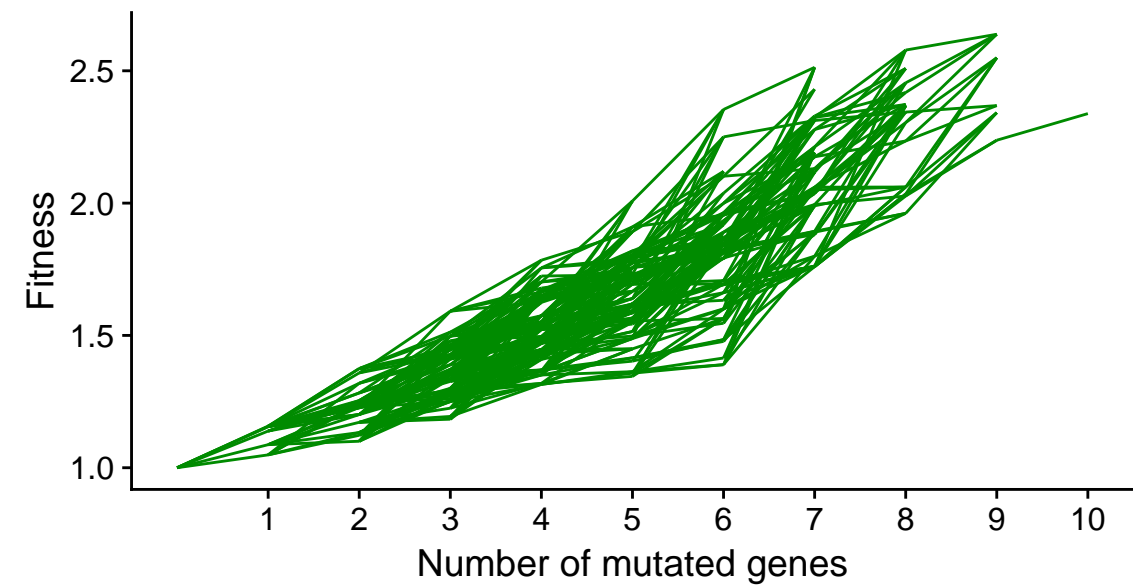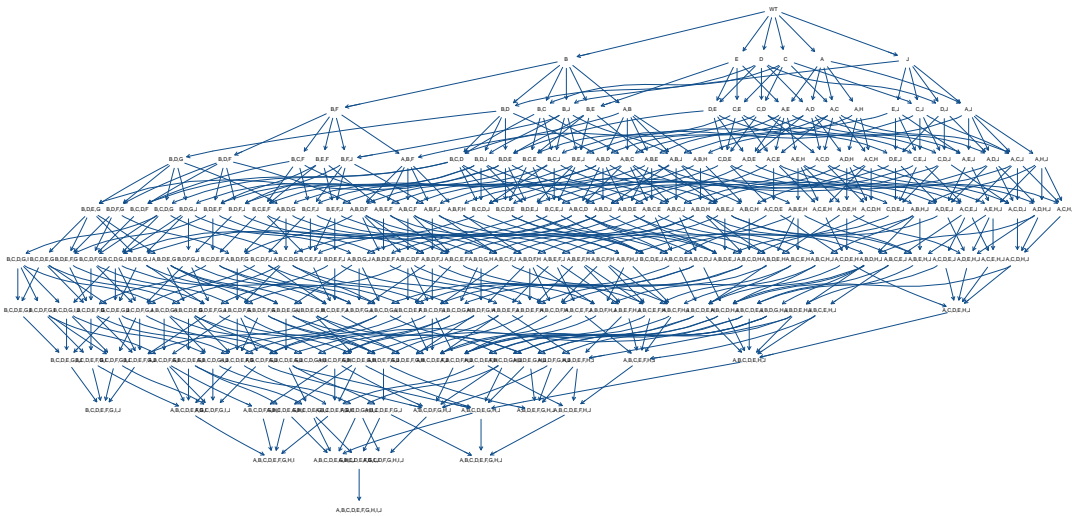



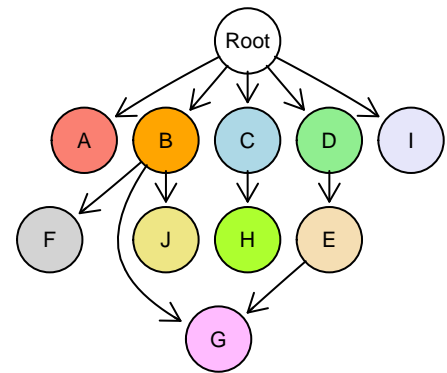

*ID* EJVLcdkFsVSwbukT  
*acc genotypes* 228  
*peaks no back* 18  
*removed edges* 157  
*prop rem edges* 0.202

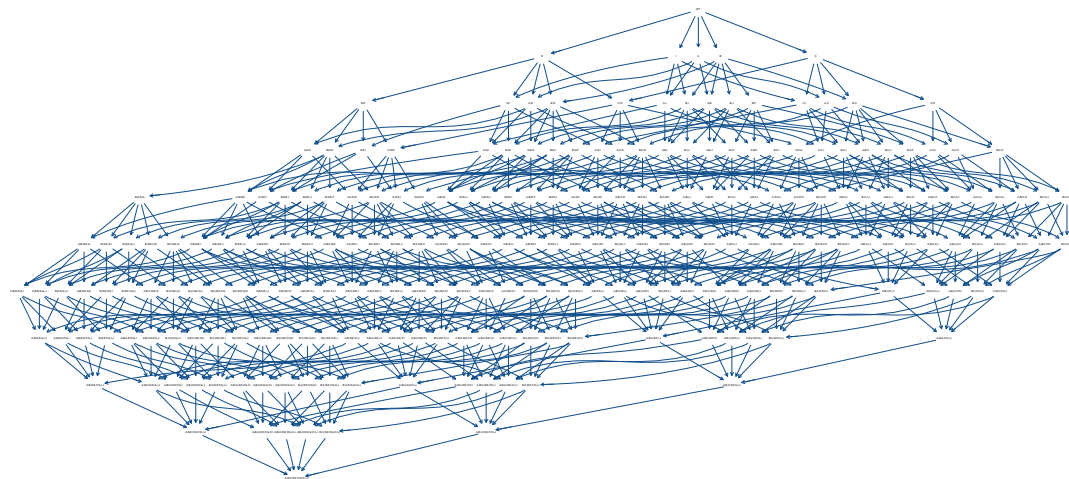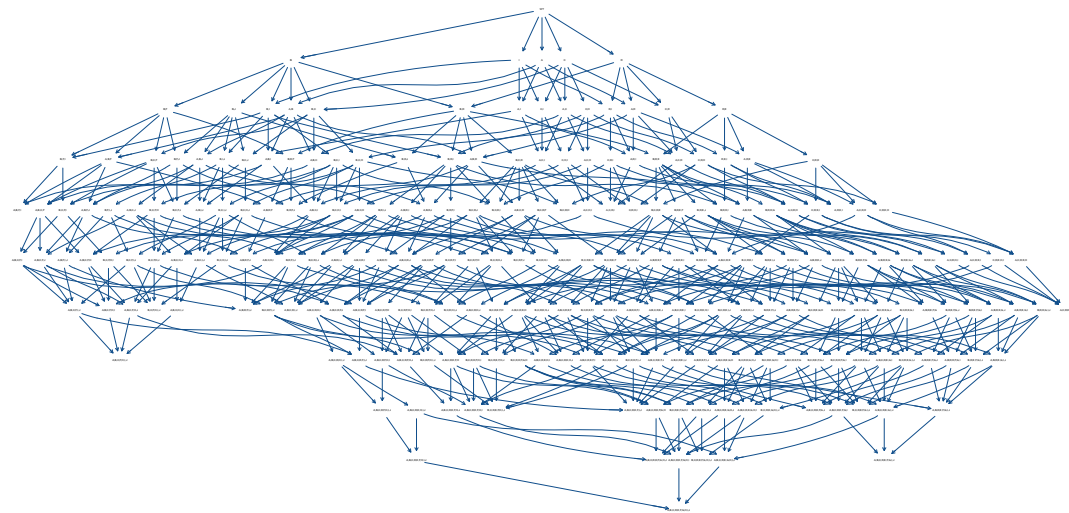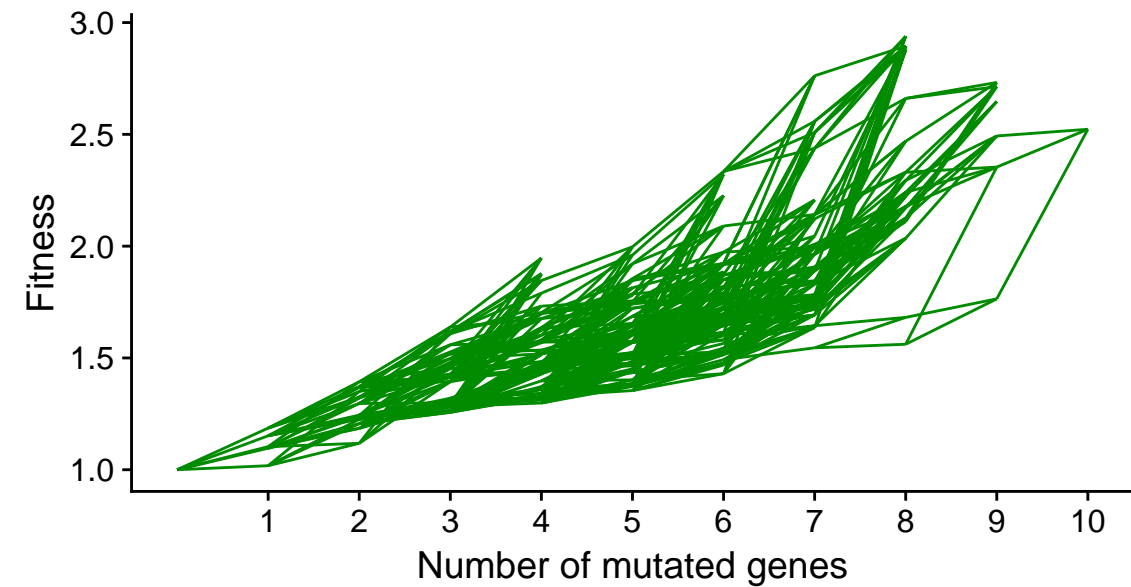

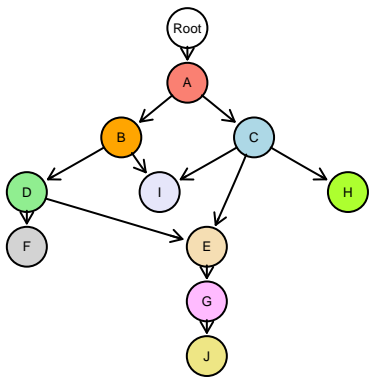

ID EkGrTn9N4iF6FhfE  
 acc genotypes 43  
 peaks no back 5  
 removed edges 15  
 prop rem edges 0.165

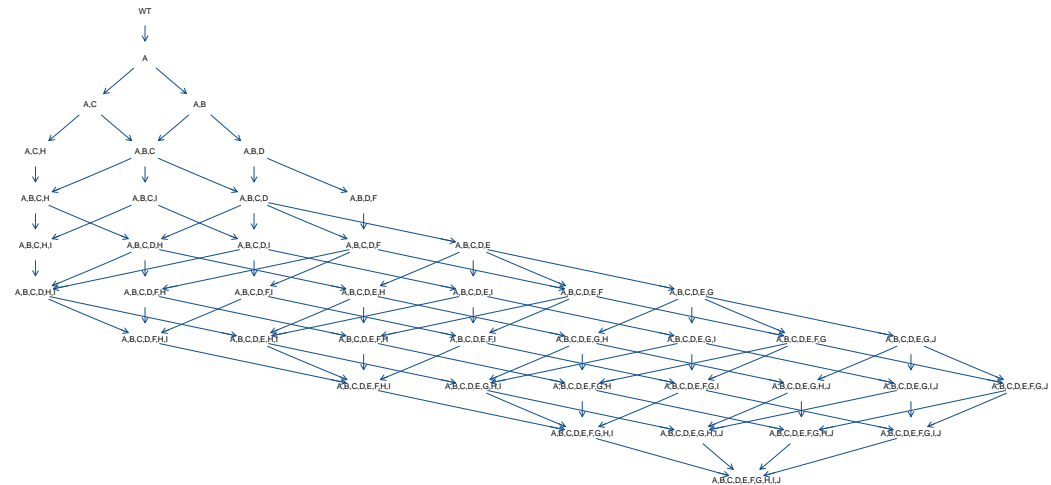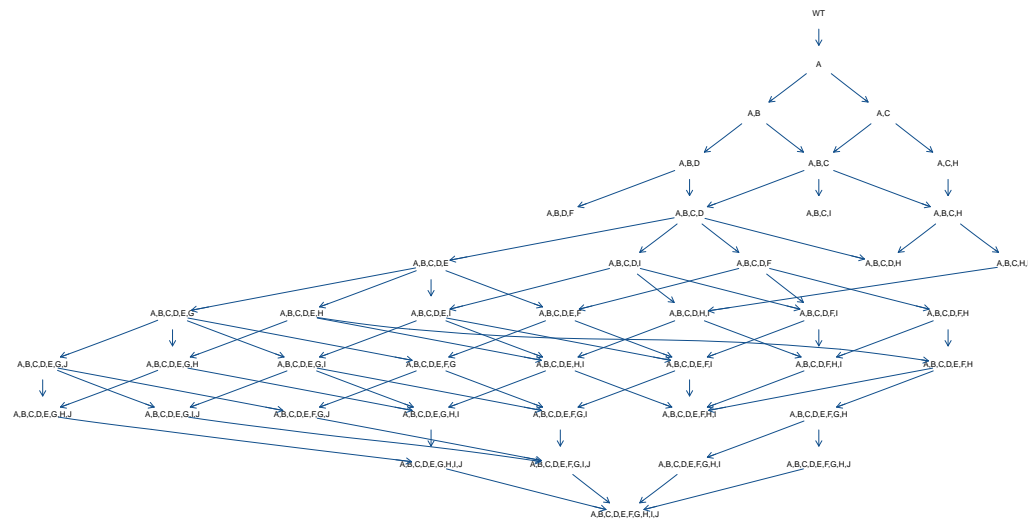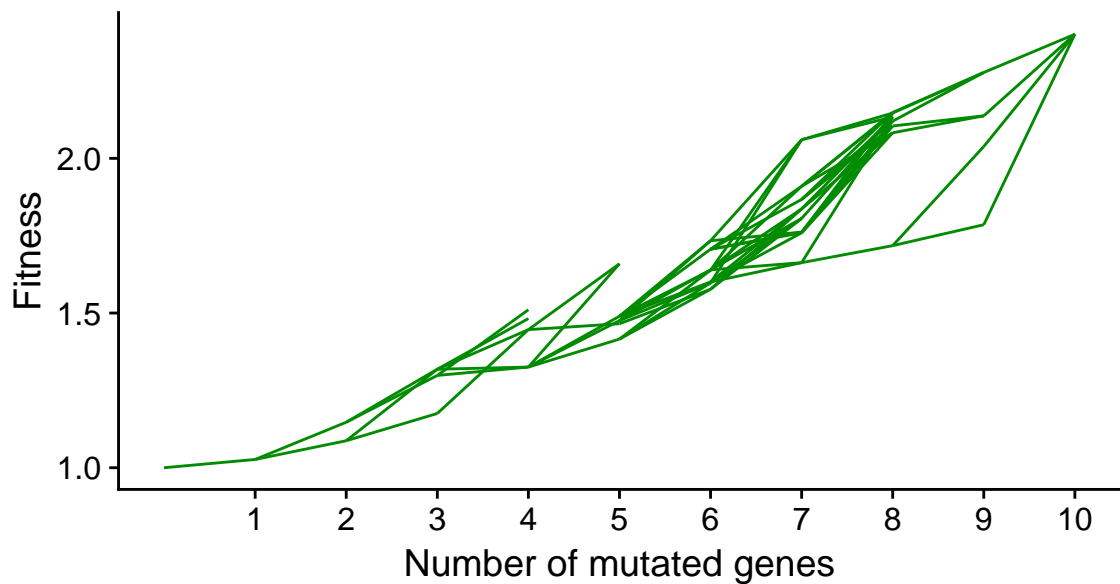

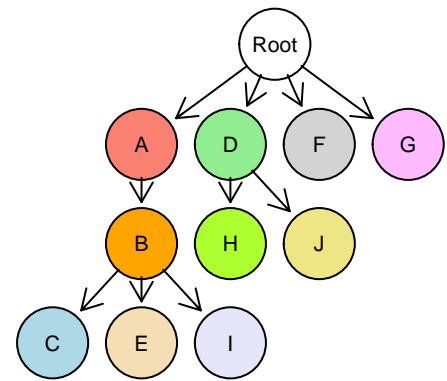

ID **EMu88ff7108oDY2Nd**  
 acc genotypes **200**  
 peaks no back **21**  
 removed edges **136**  
 prop rem edges **0.2**

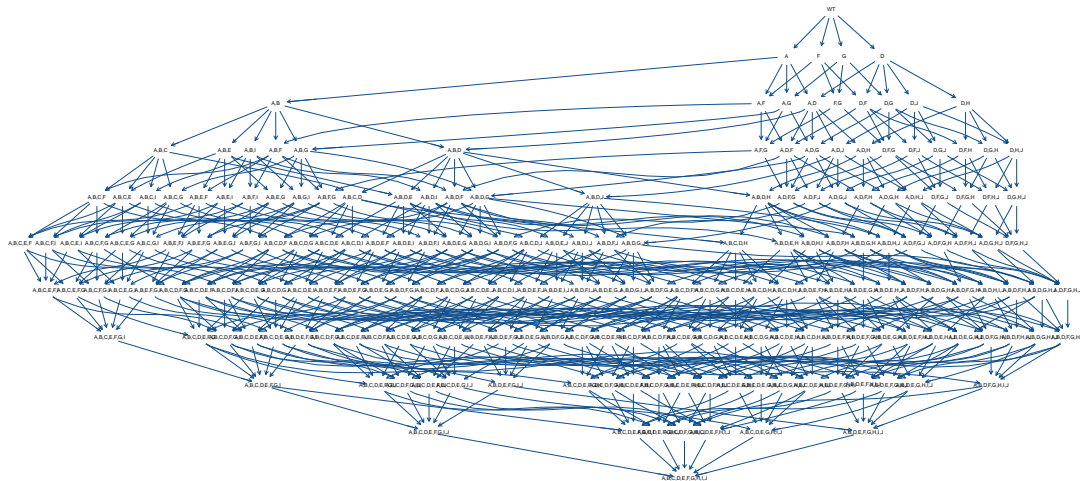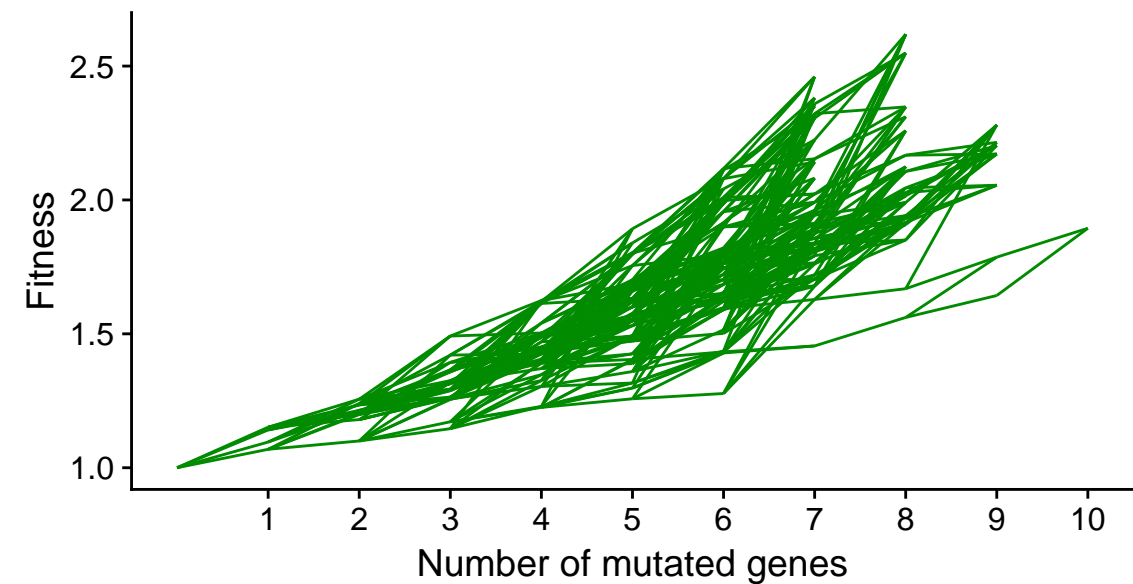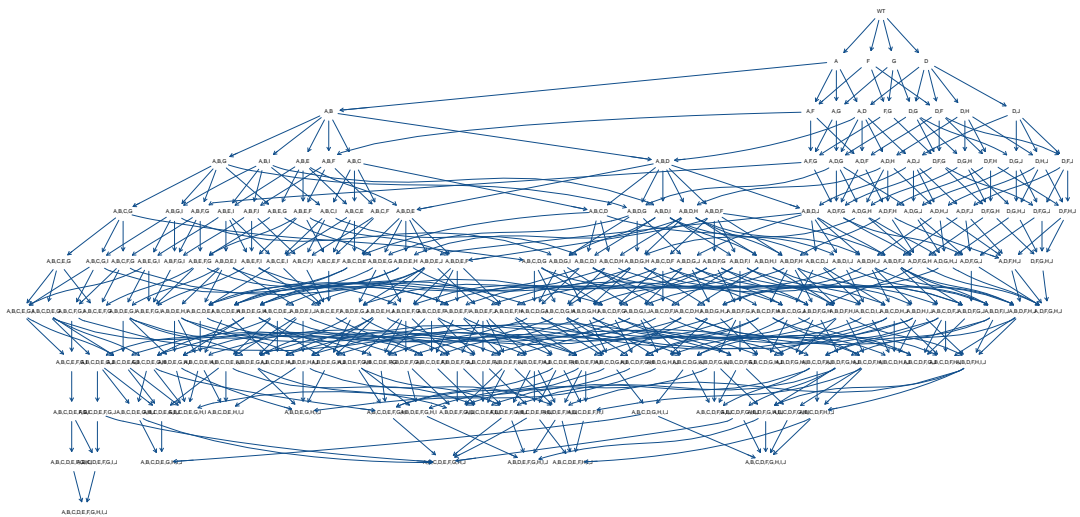

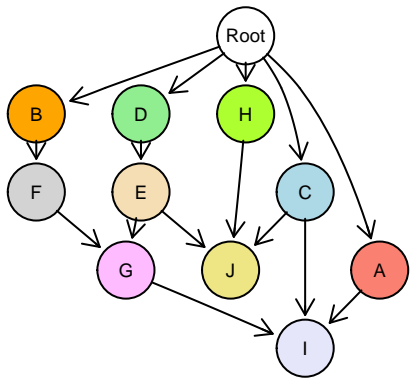

*ID* EnDJ6doxjCtQ9zue  
*acc genotypes* 91  
*peaks no back* 11  
*removed edges* 52  
*prop rem edges* 0.211

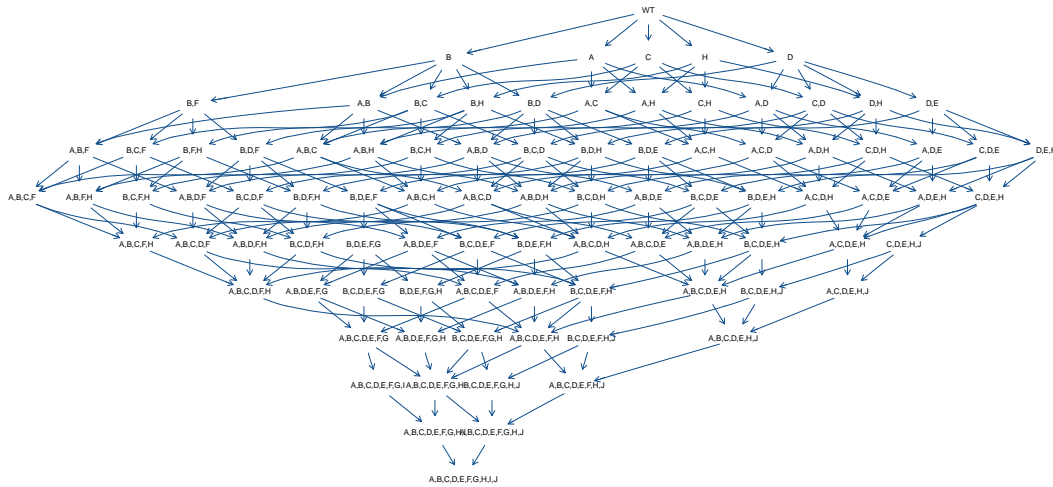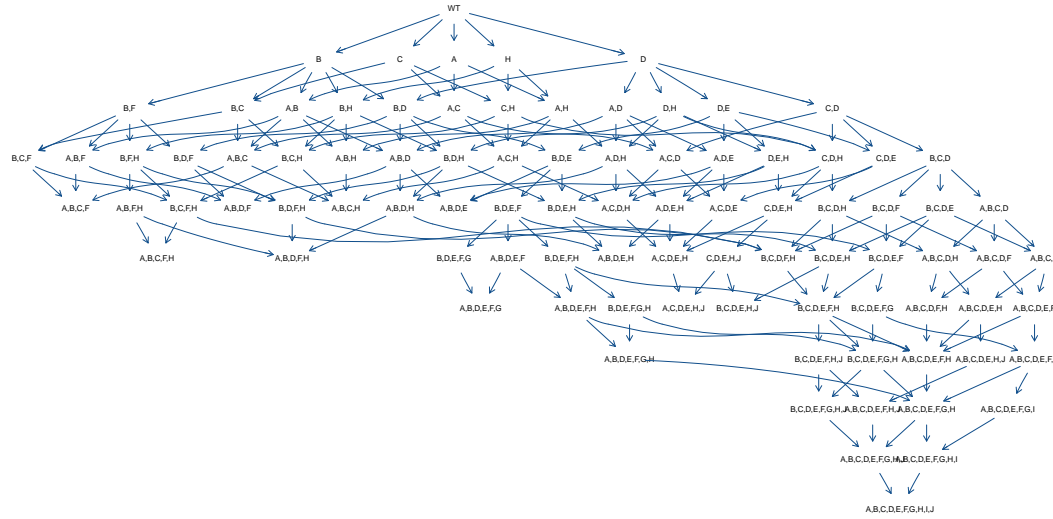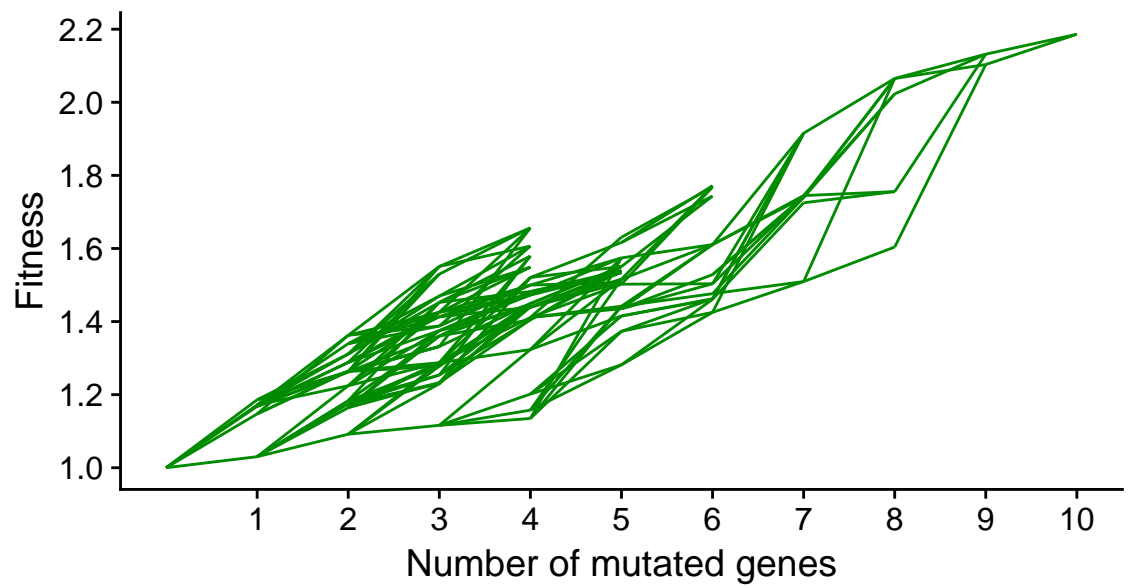

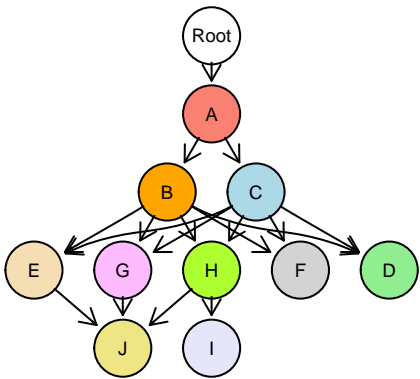

ID EPFiT9RotYTgEnMR  
 acc genotypes 60  
 peaks no back 7  
 removed edges 30  
 prop rem edges 0.196

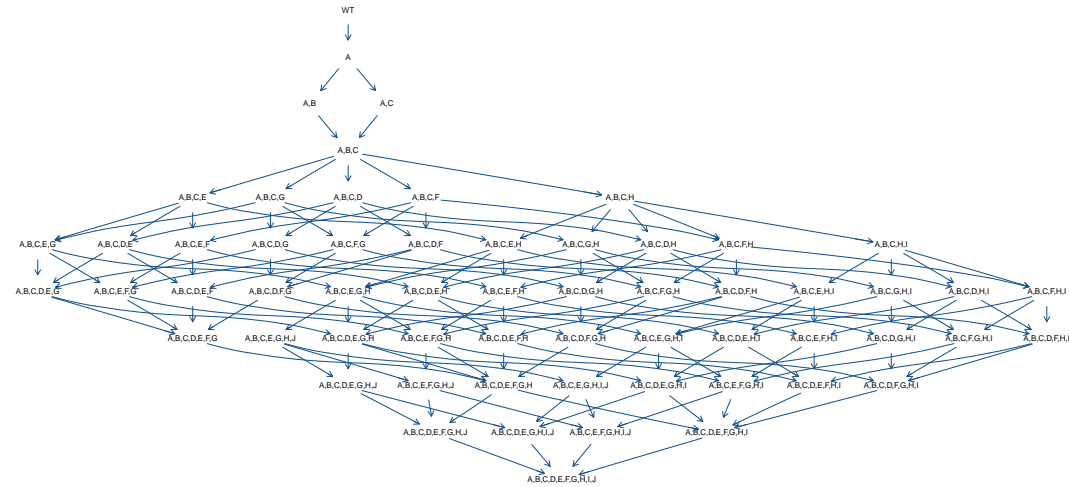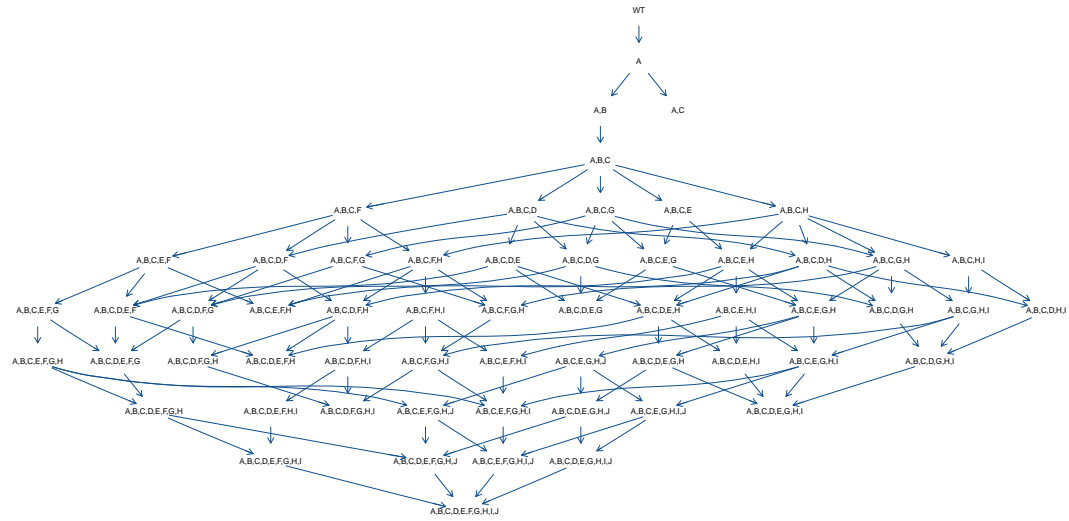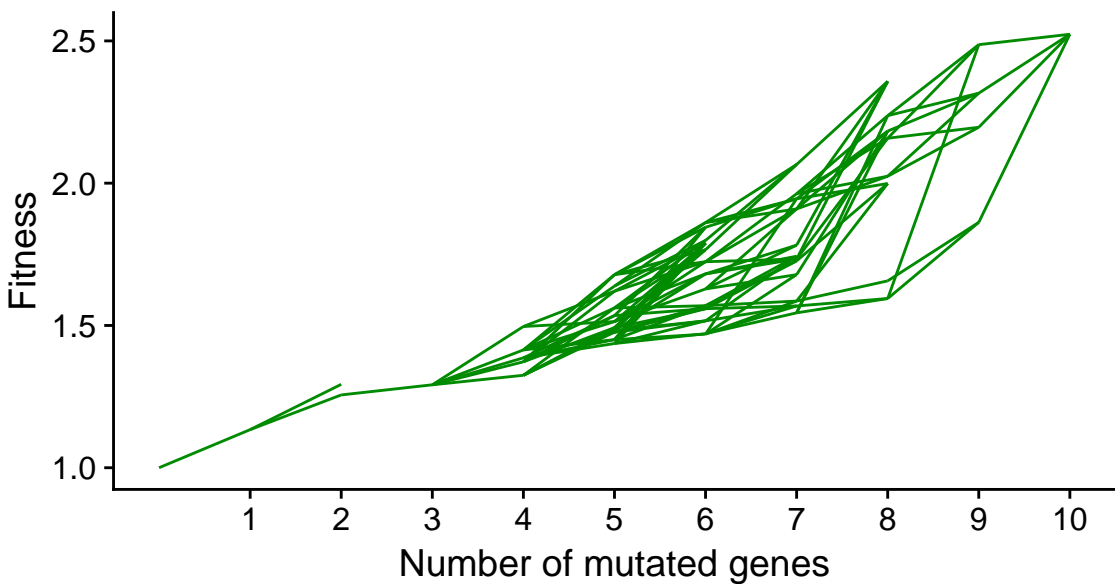

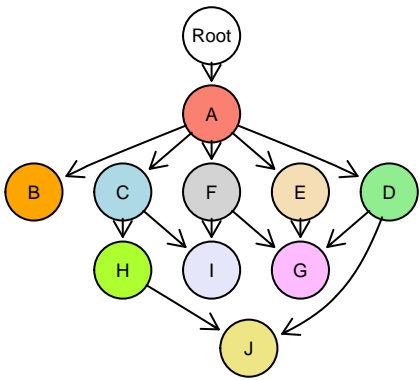

ID **FcFcGhQtL910uSnWI**  
 acc genotypes **91**  
 peaks no back **10**  
 removed edges **51**  
 prop rem edges **0.207**

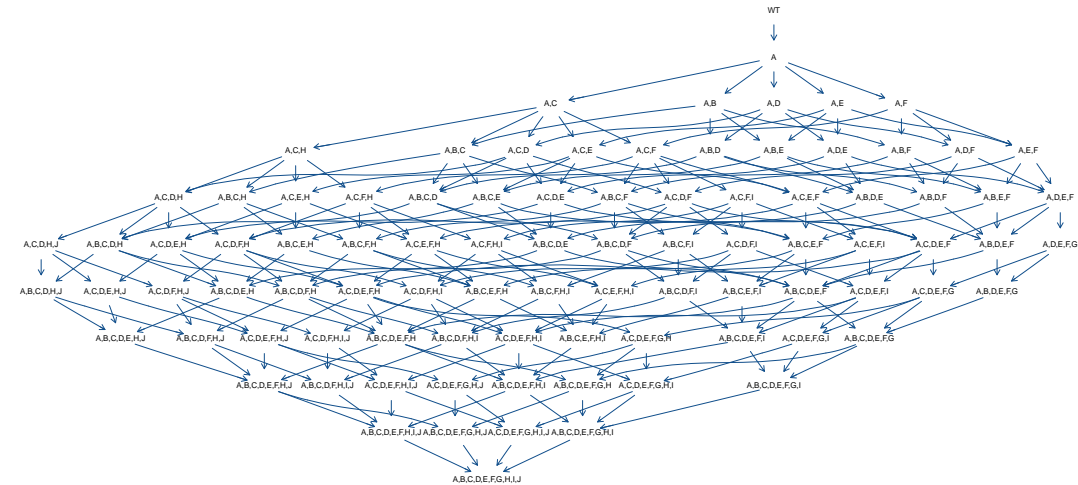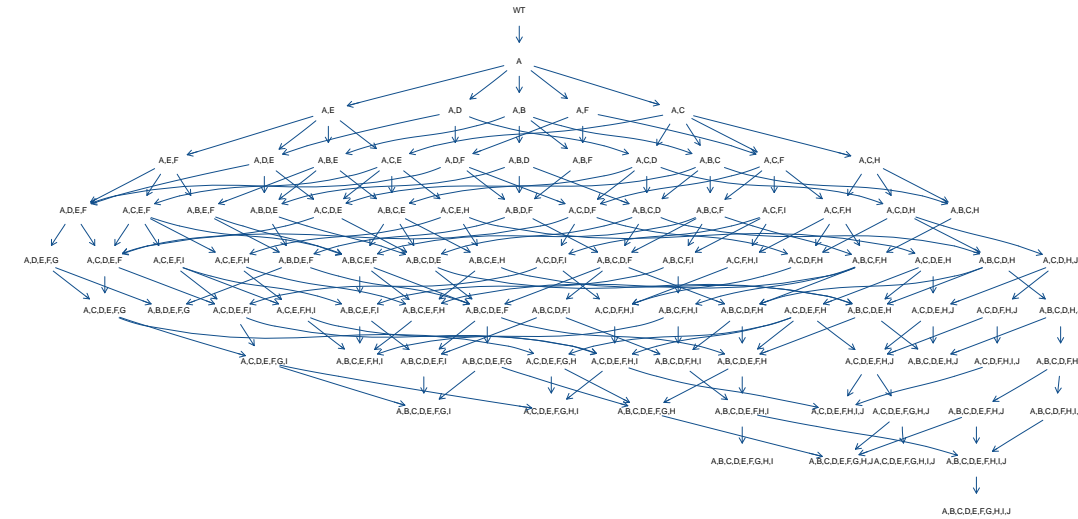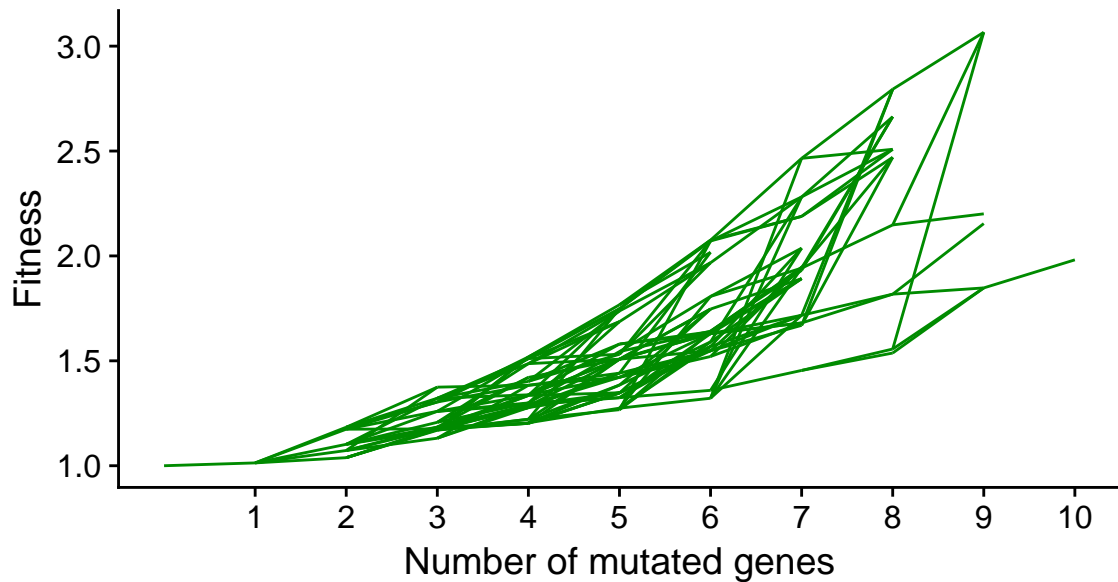

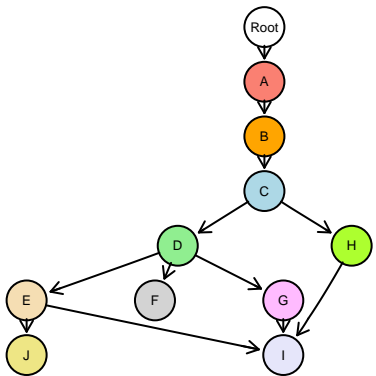

ID **fCI5UMNFVGXtbOWb**  
 acc genotypes **33**  
 peaks no back **2**  
 removed edges **4**  
 prop rem edges **0.061**

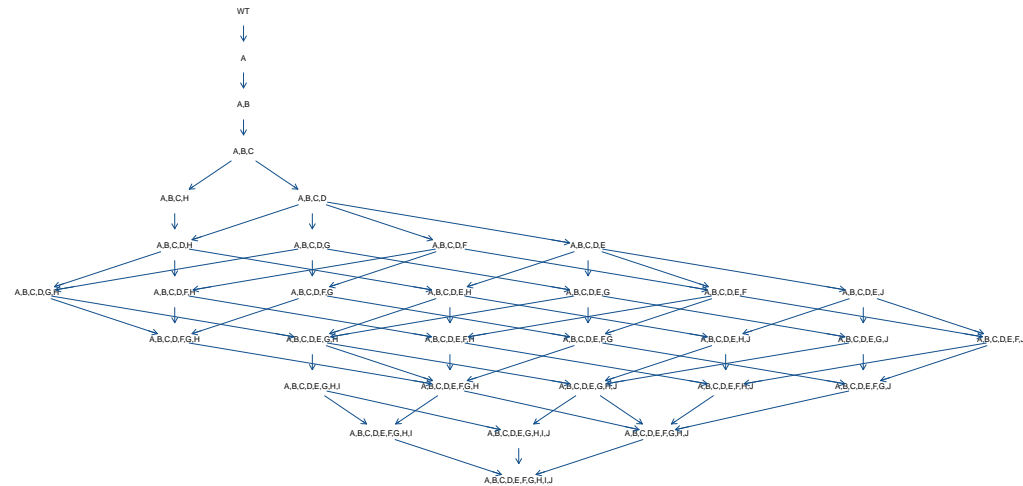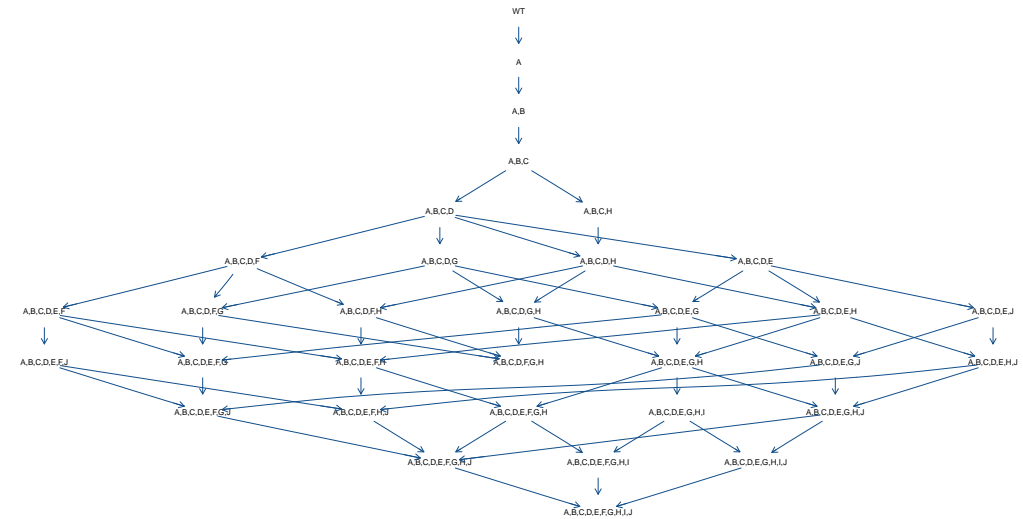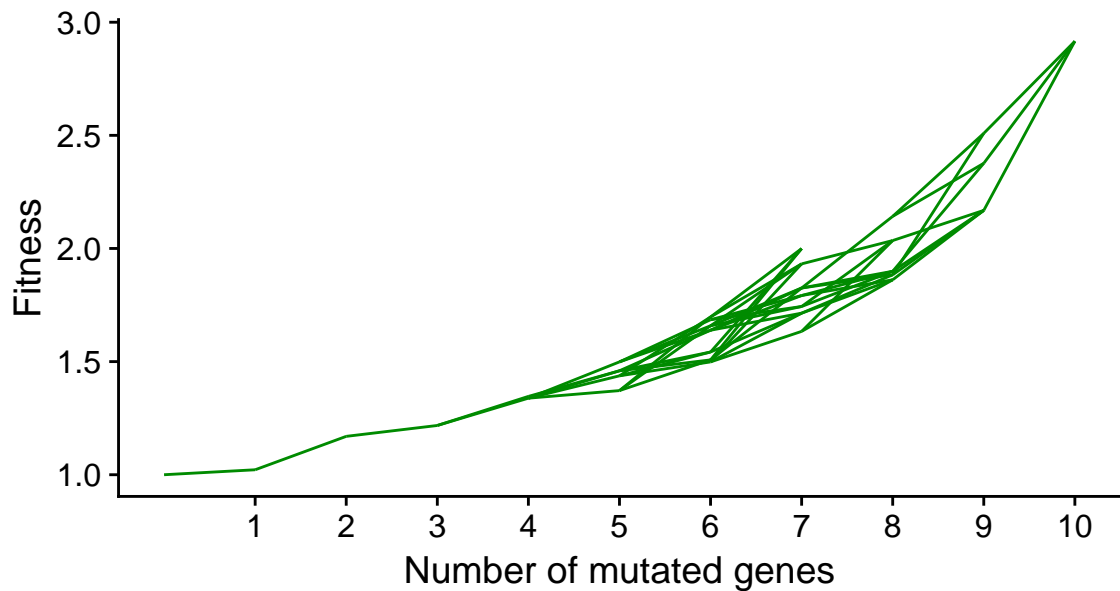

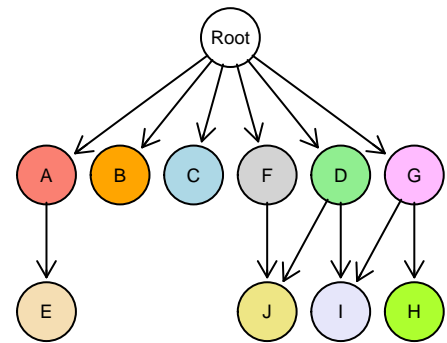

ID fjYI5FajfI1I9TqE  
 acc genotypes 252  
 peaks no back 17  
 removed edges 166  
 prop rem edges 0.189

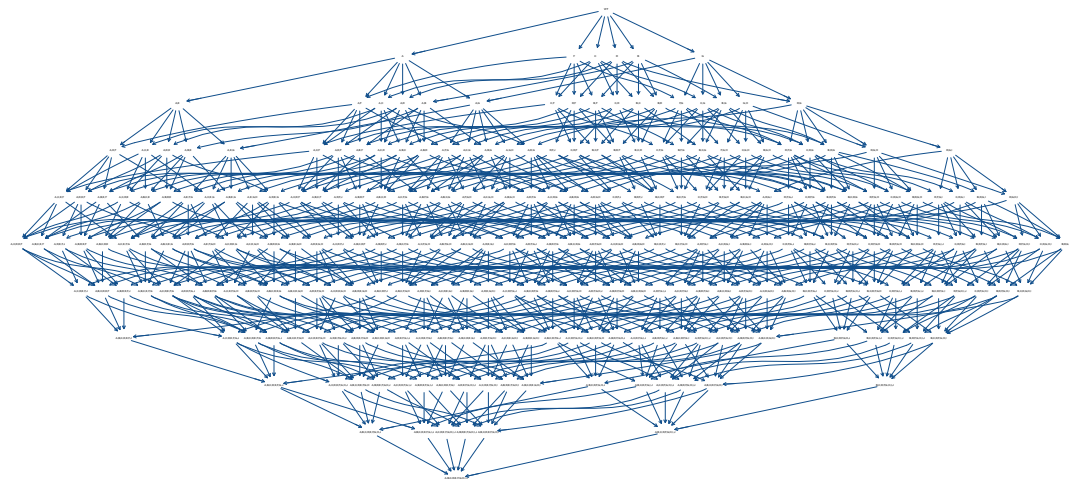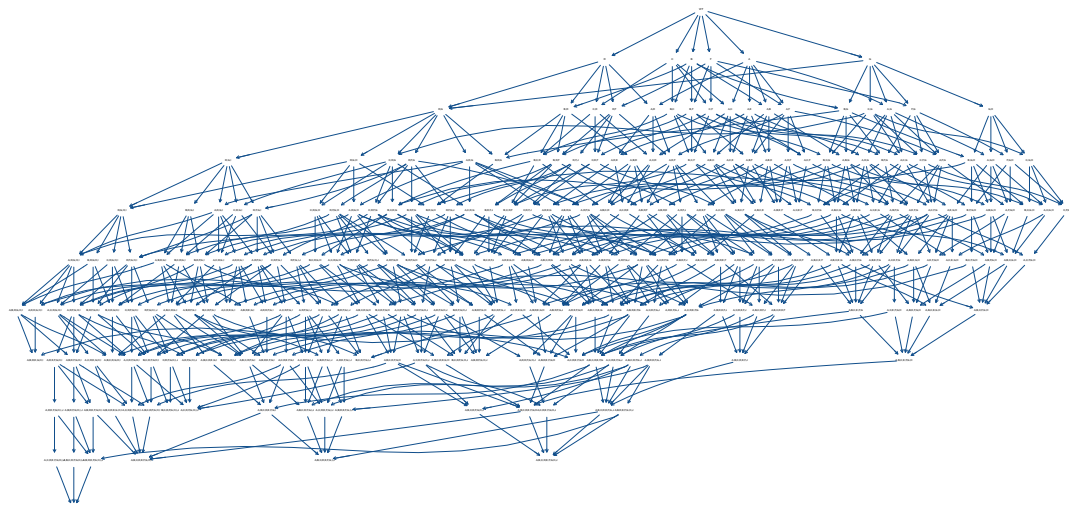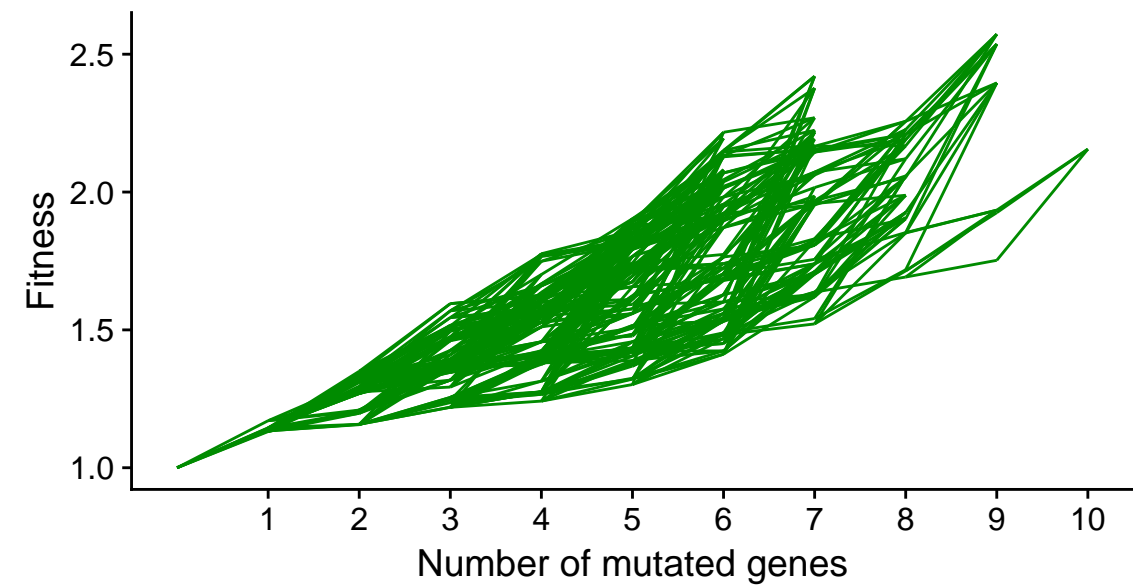



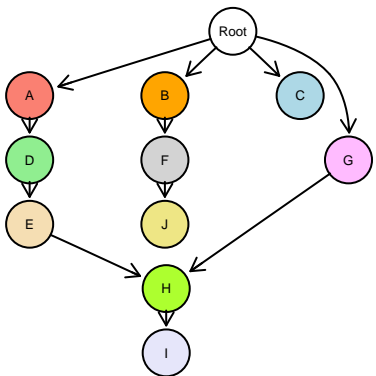

ID **FNDb716ELrbzr3xJ**  
 acc genotypes **80**  
 peaks no back **3**  
 removed edges **22**  
 prop rem edges **0.112**

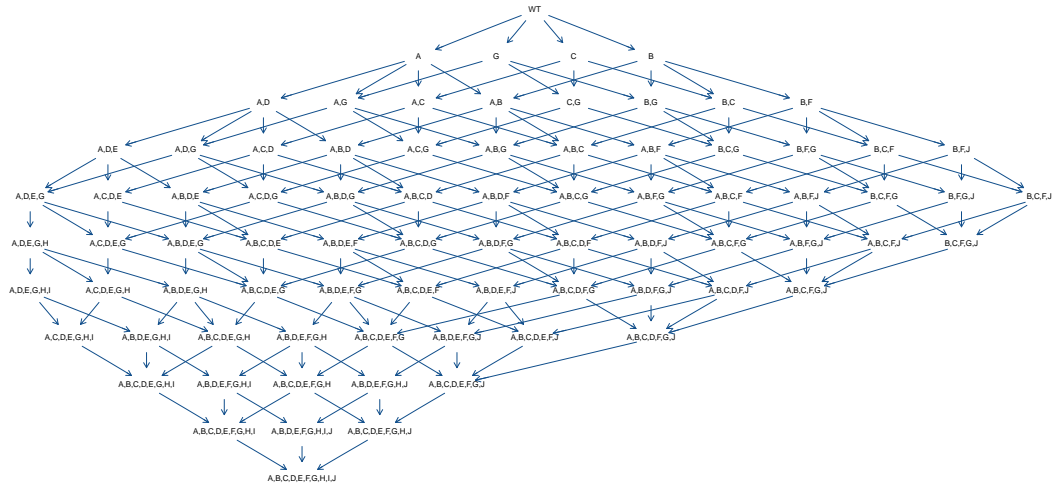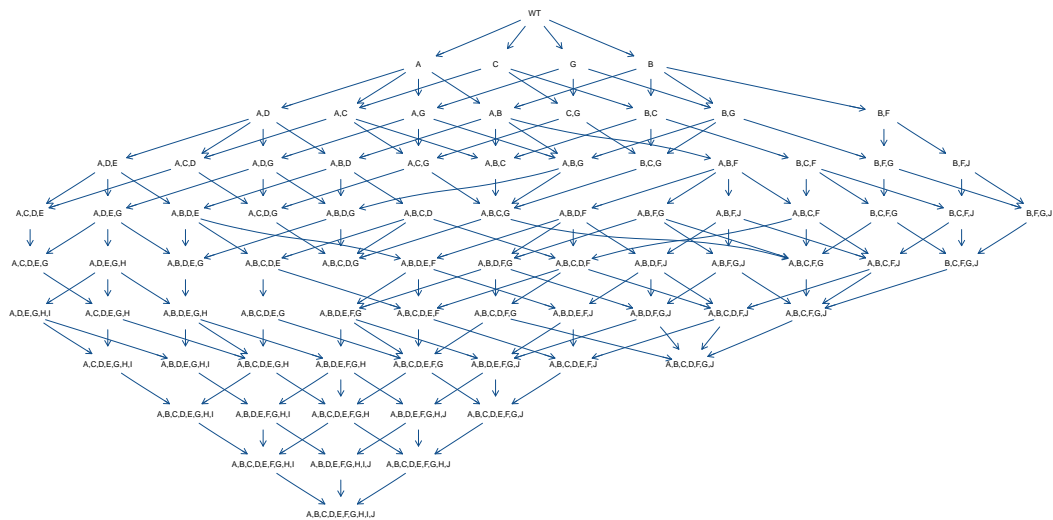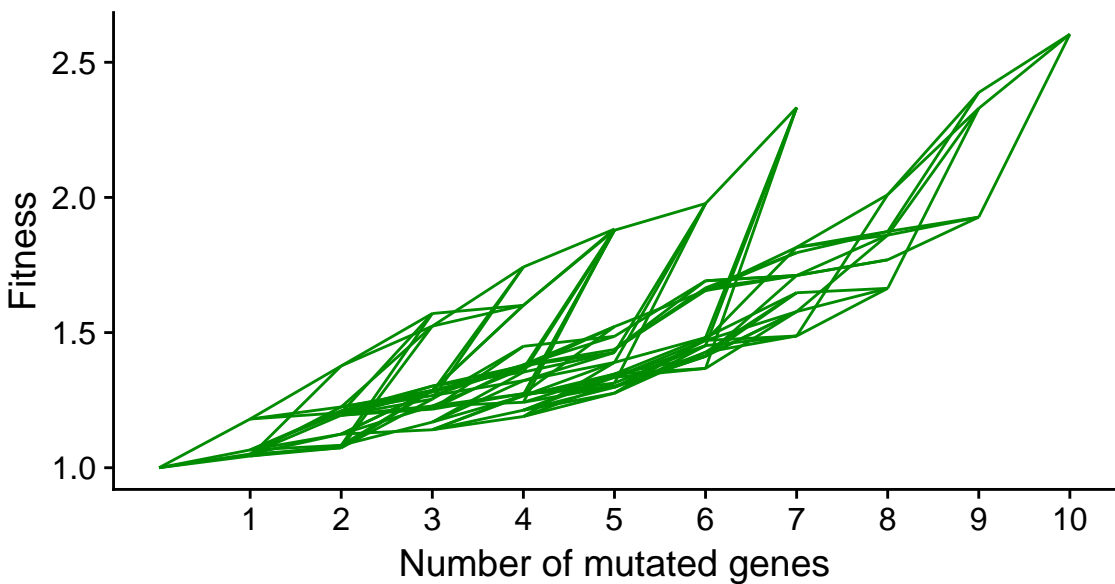

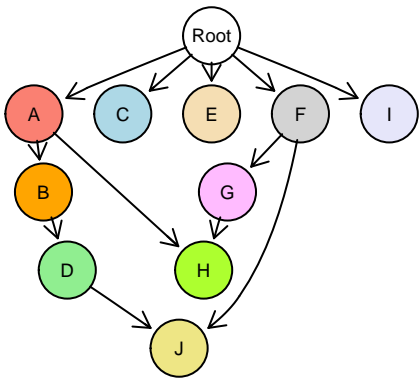

*ID* Fp1fshyDCkcvIW97  
*acc genotypes* 144  
*peaks no back* 13  
*removed edges* 95  
*prop rem edges* 0.22

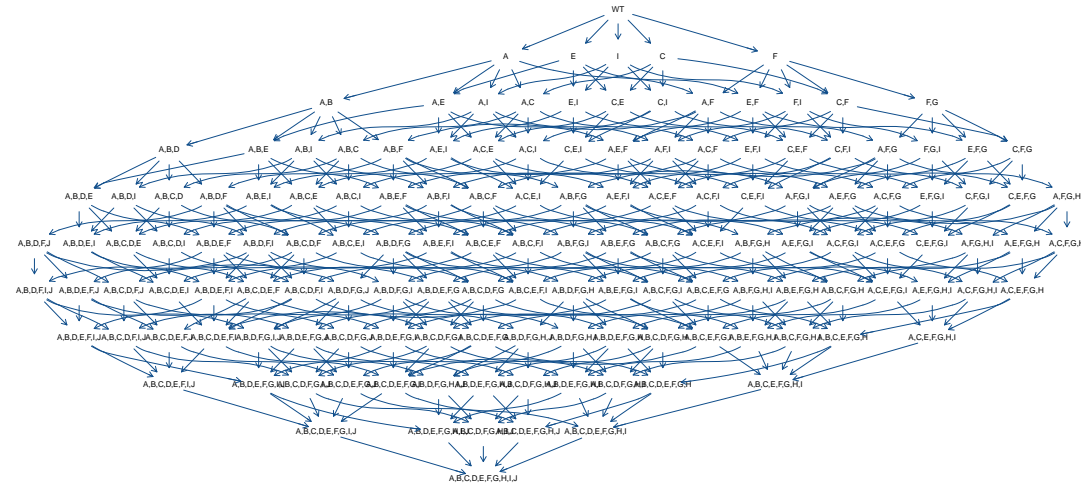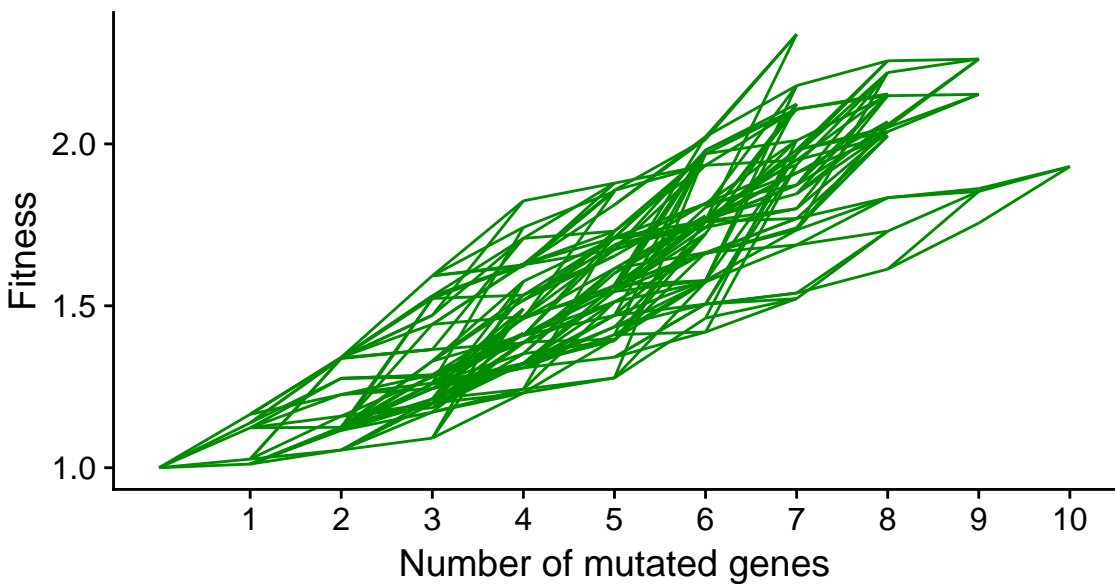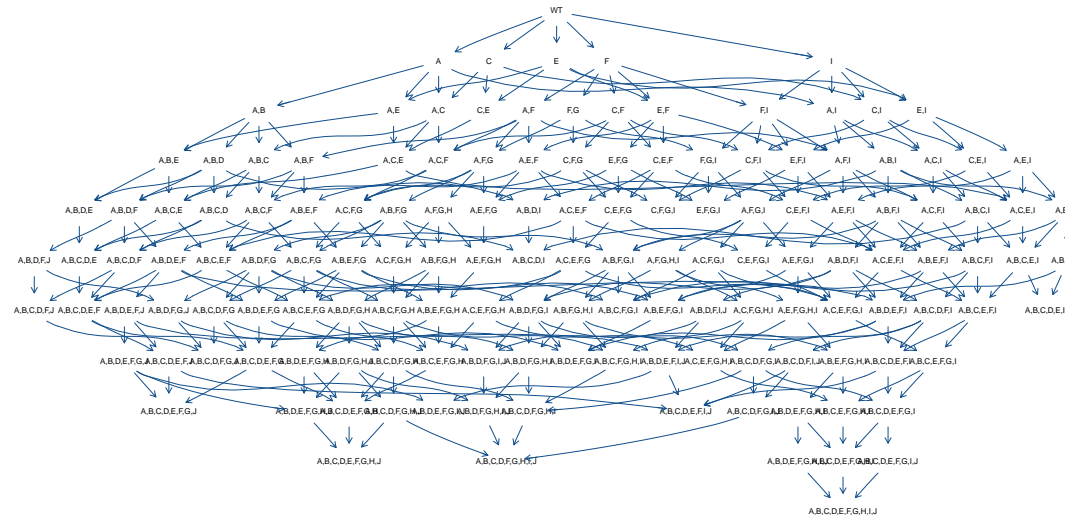

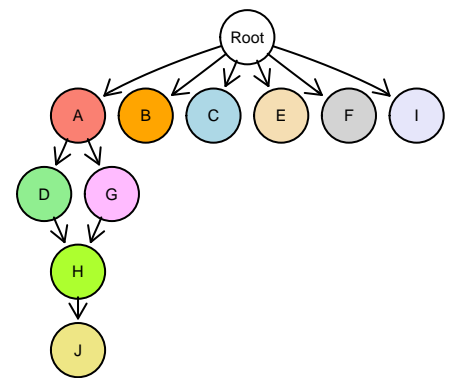

*ID* ftHhRYTFn79eRdaP  
*acc genotypes* 224  
*peaks no back* 19  
*removed edges* 143  
*prop rem edges* 0.182

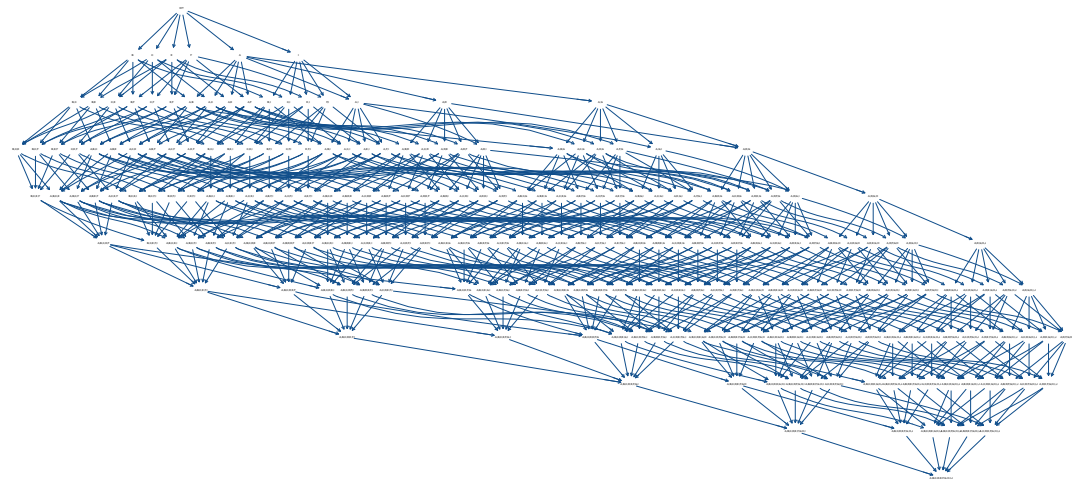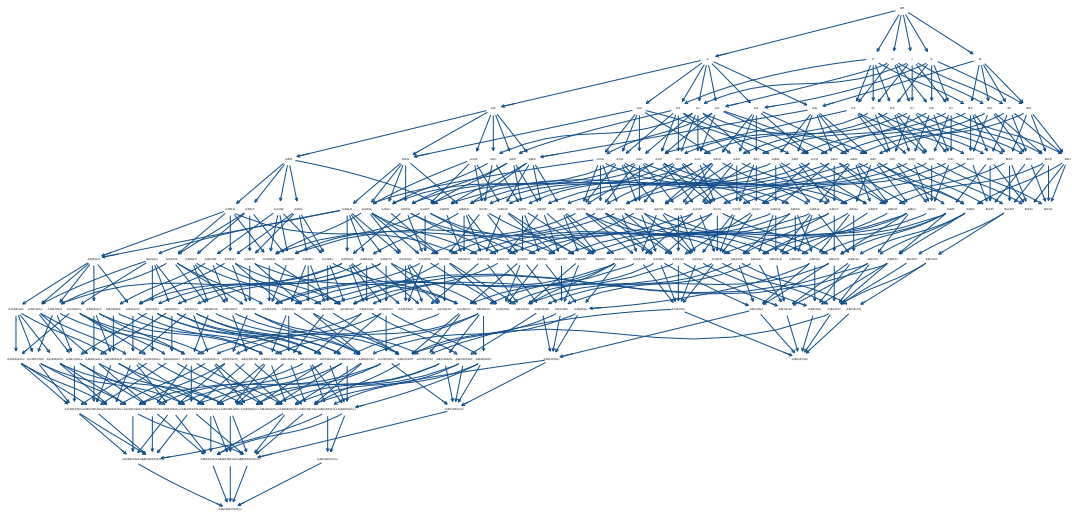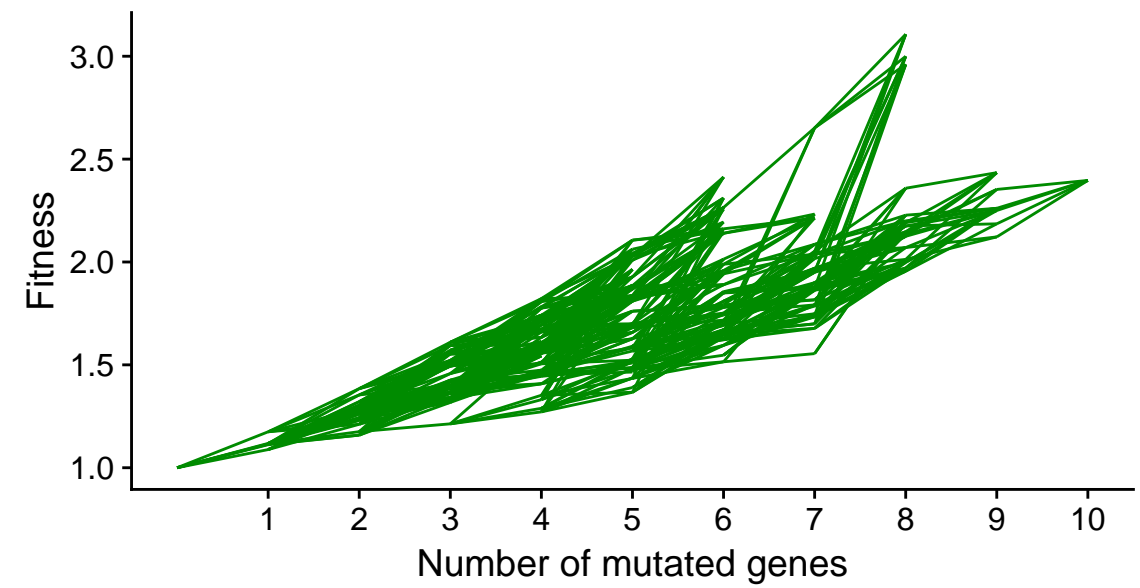

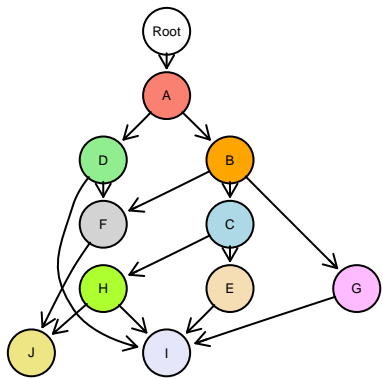

ID **fV68aMwNjcqHIZQX**  
 acc genotypes **40**  
 peaks no back **3**  
 removed edges **11**  
 prop rem edges **0.134**

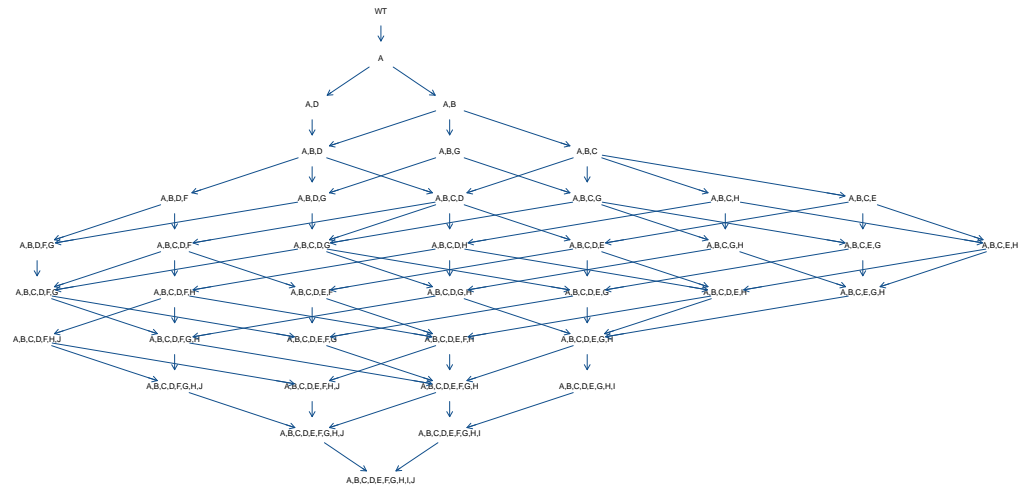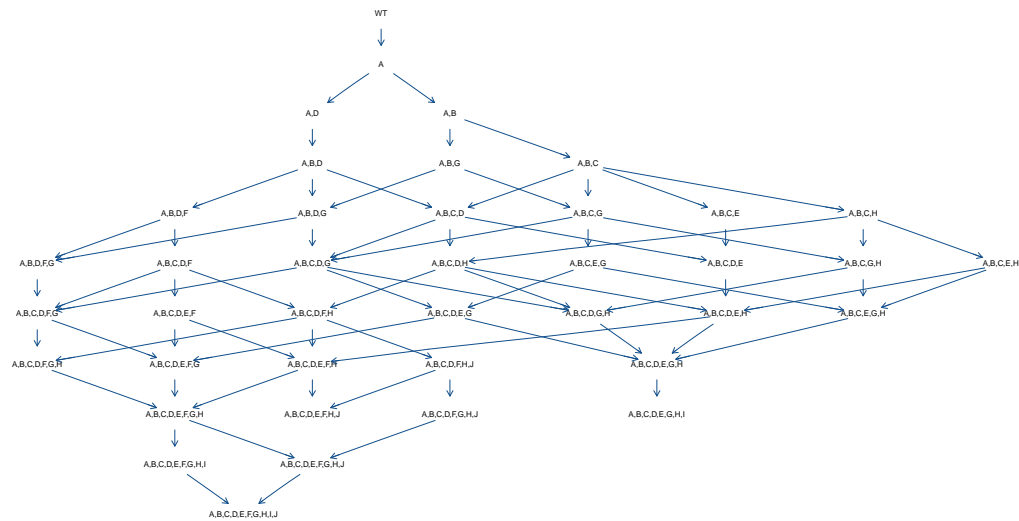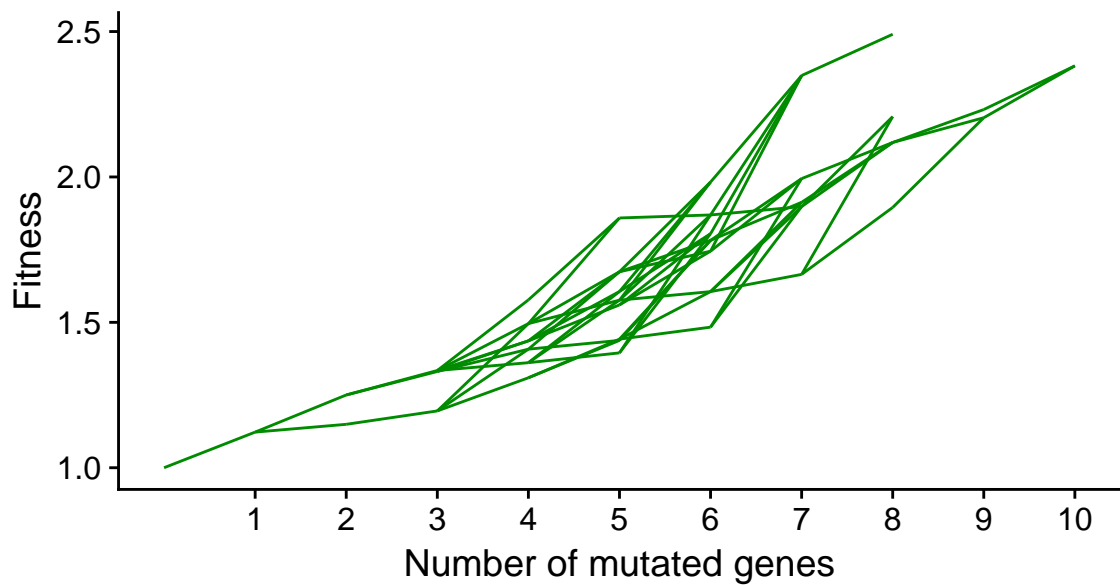

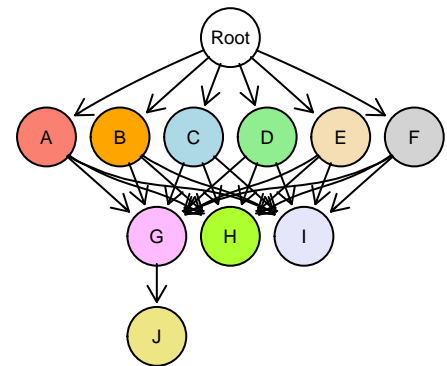

ID **g632uhVWzFmg59eK**  
 acc genotypes **75**  
 peaks no back **10**  
 removed edges **31**  
 prop rem edges **0.146**

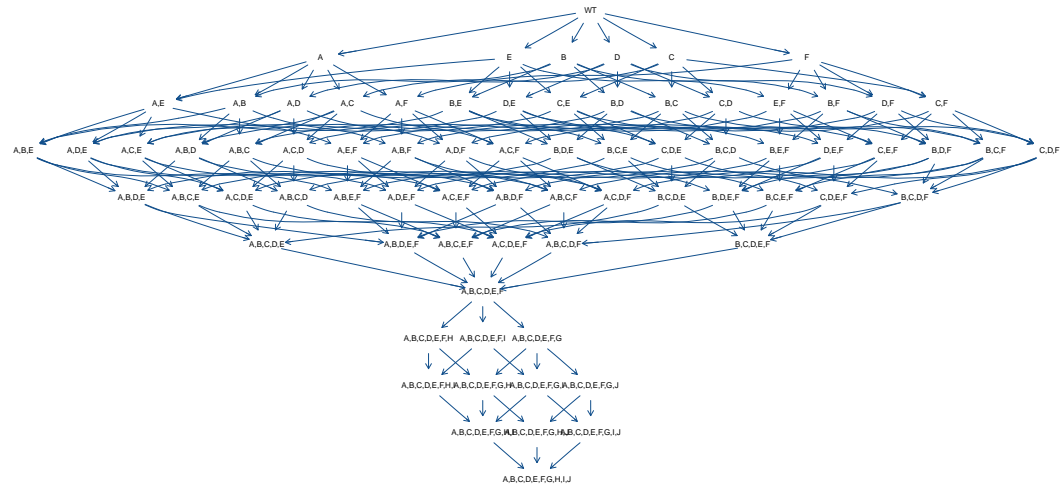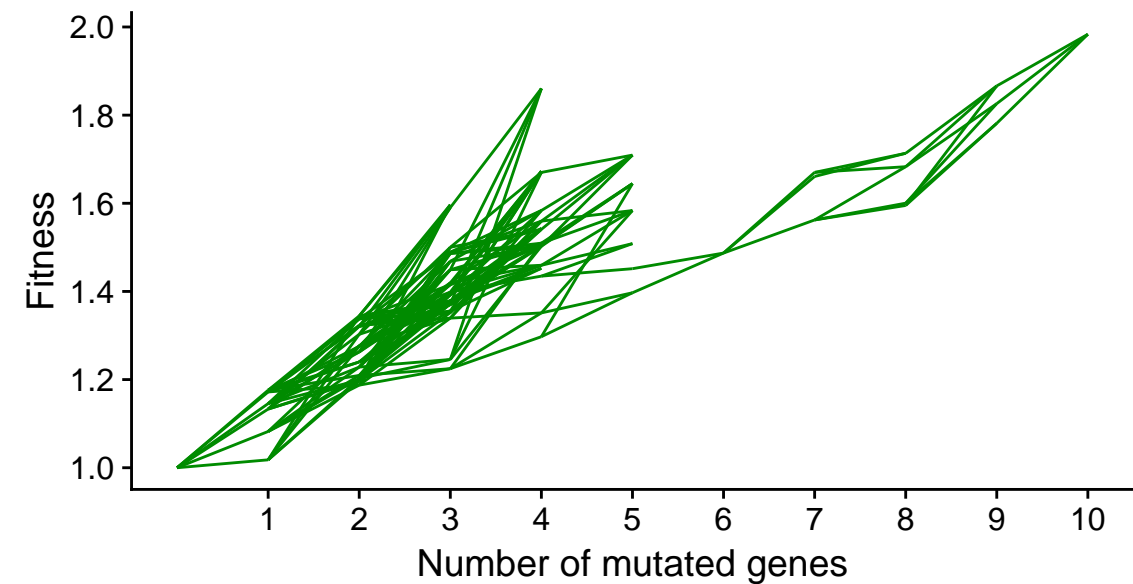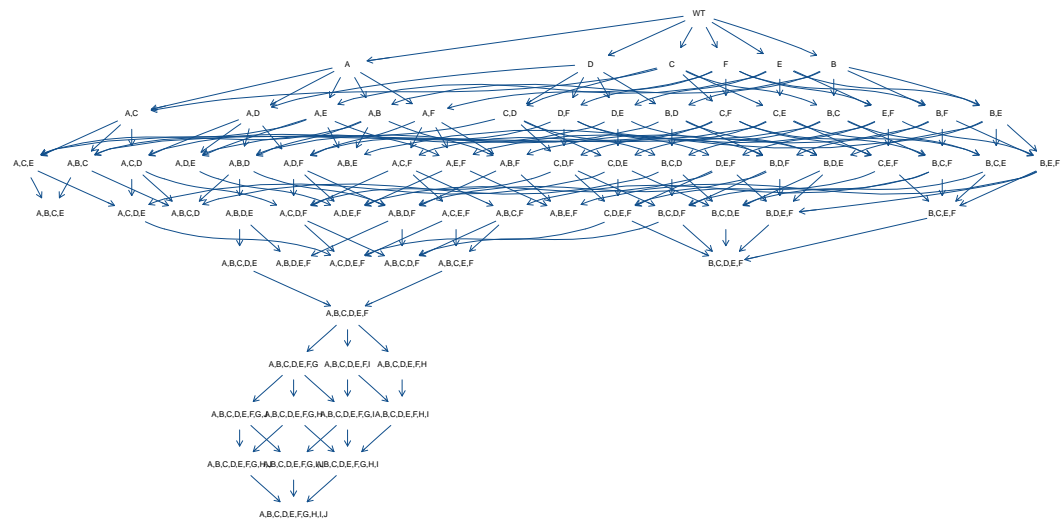

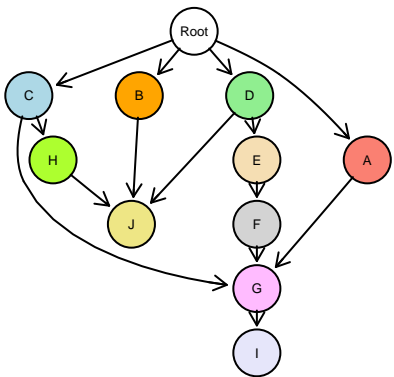

ID **G9yrl22aEcqd1Y23**  
 acc genotypes **64**  
 peaks no back **8**  
 removed edges **28**  
 prop rem edges **0.188**

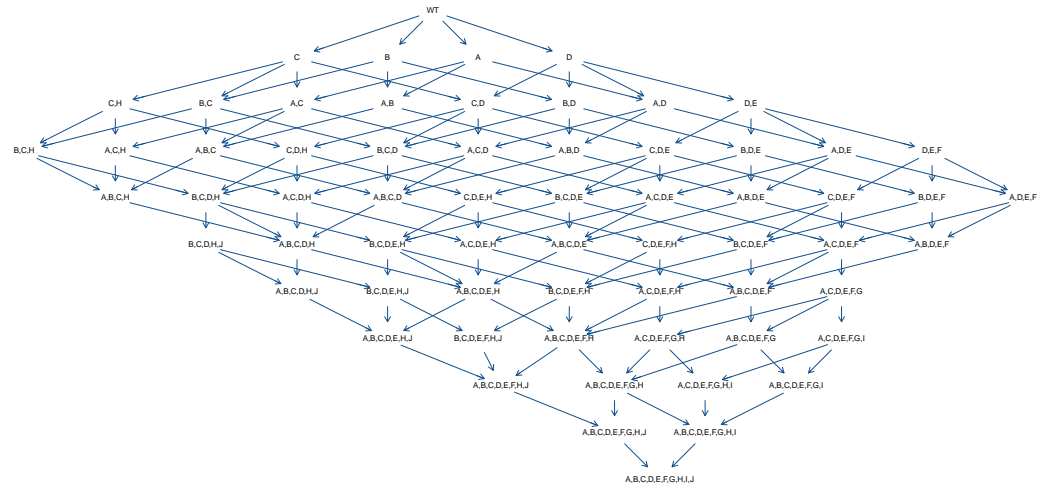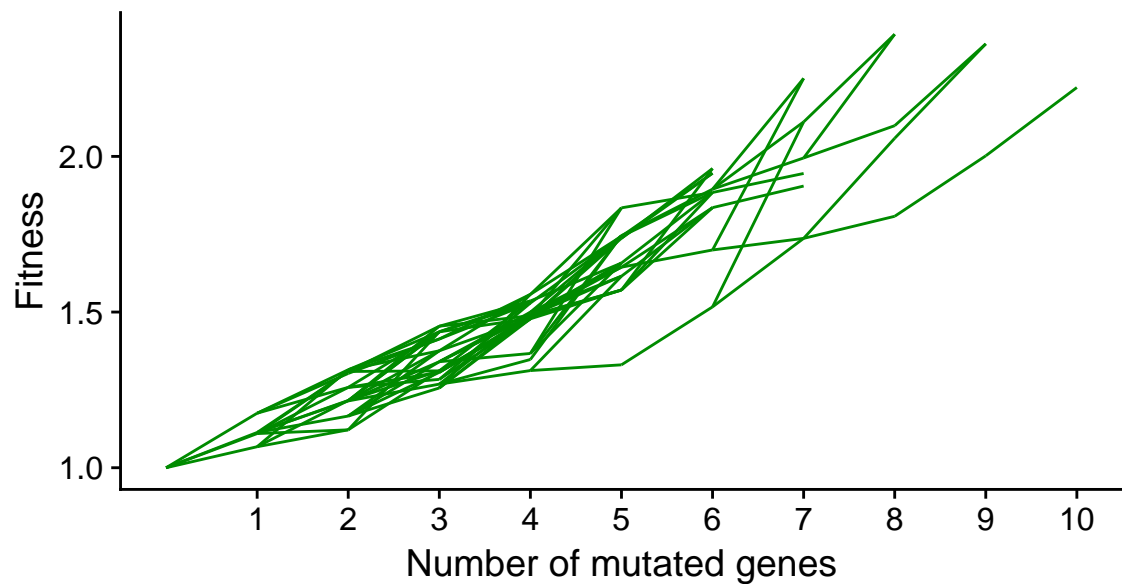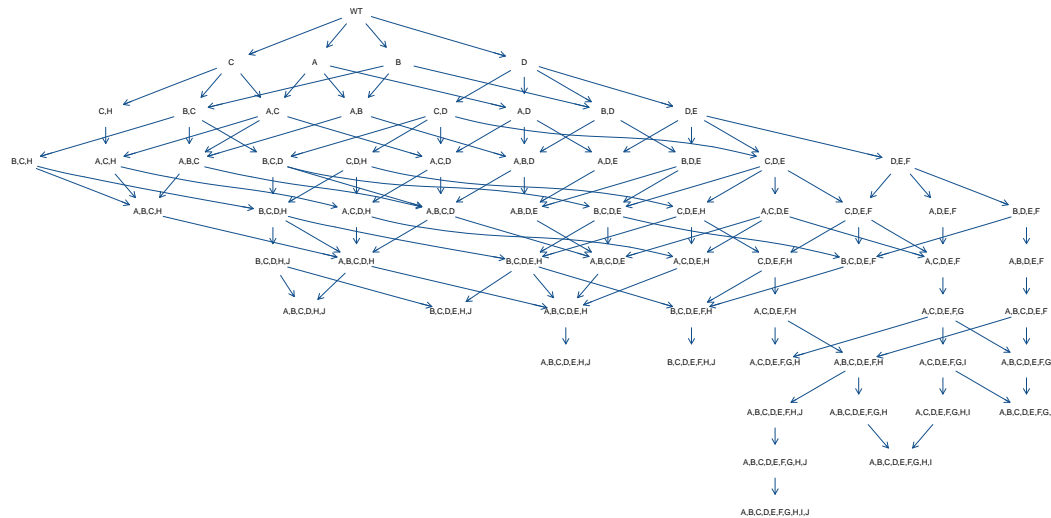

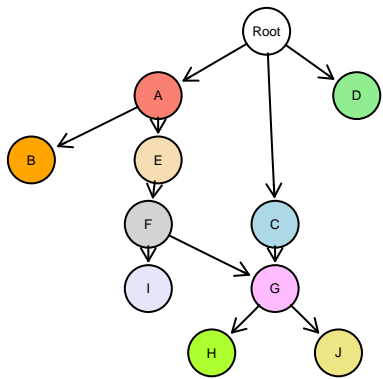

ID **gA76bffYxtXYMJa2**  
 acc genotypes **68**  
 peaks no back **11**  
 removed edges **30**  
 prop rem edges **0.179**

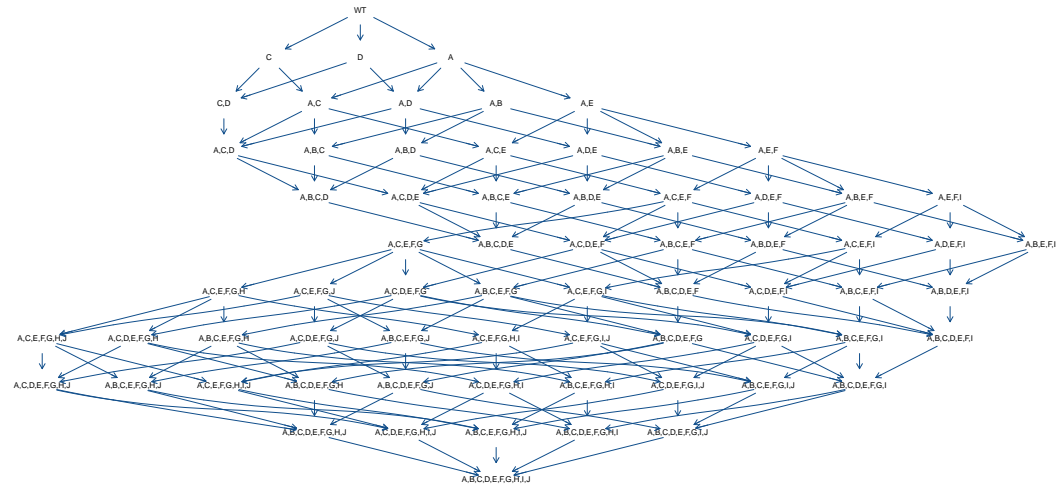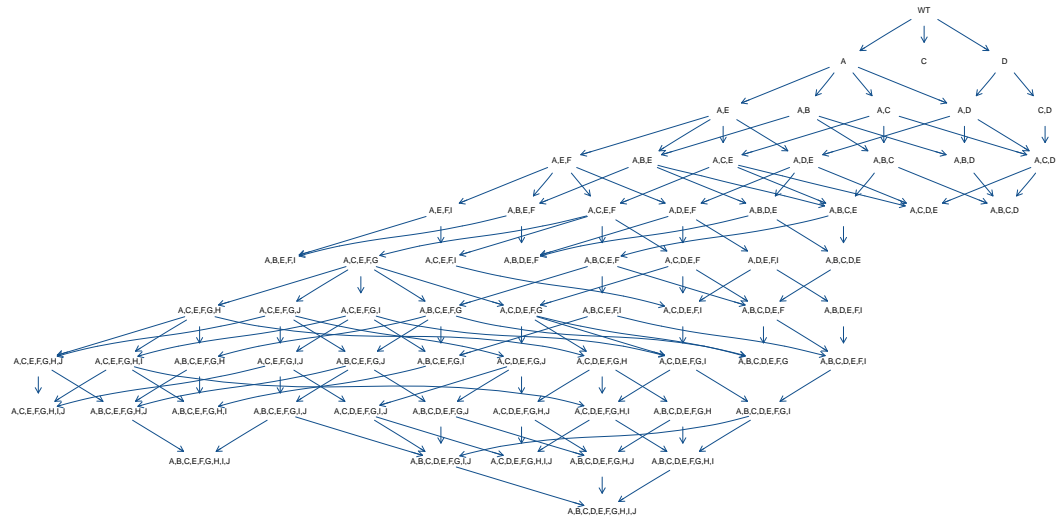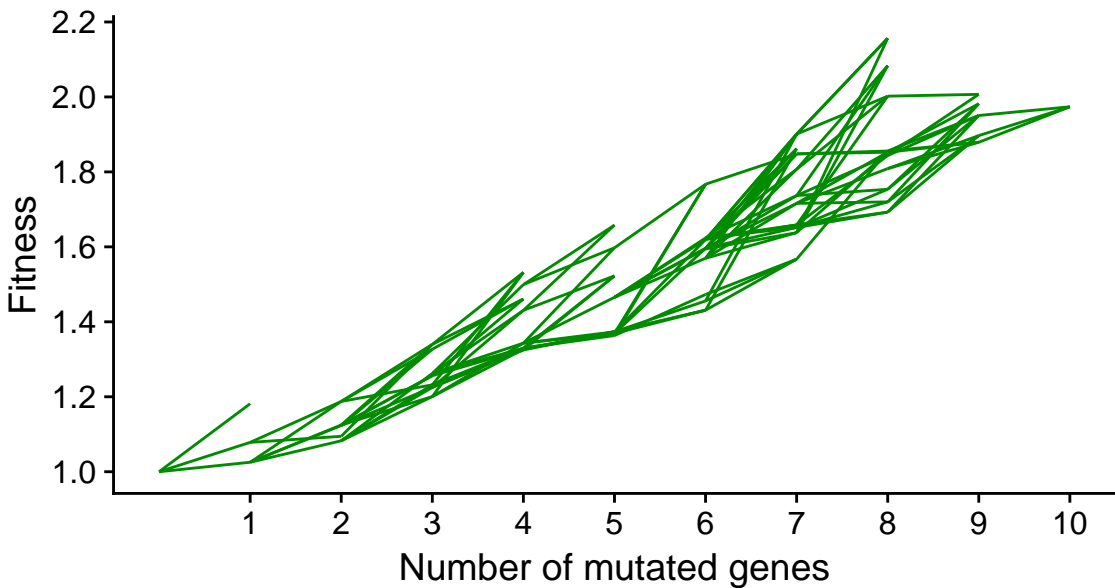

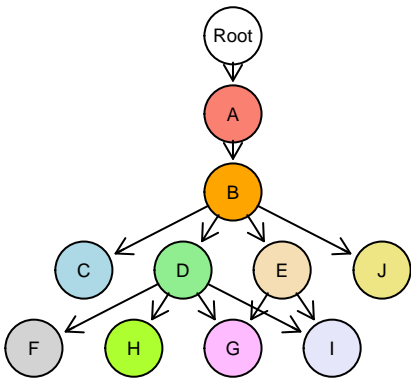

ID [GeE6ZIWGbvglE7V](#)  
 acc genotypes 90  
 peaks no back 11  
 removed edges 56  
 prop rem edges 0.214

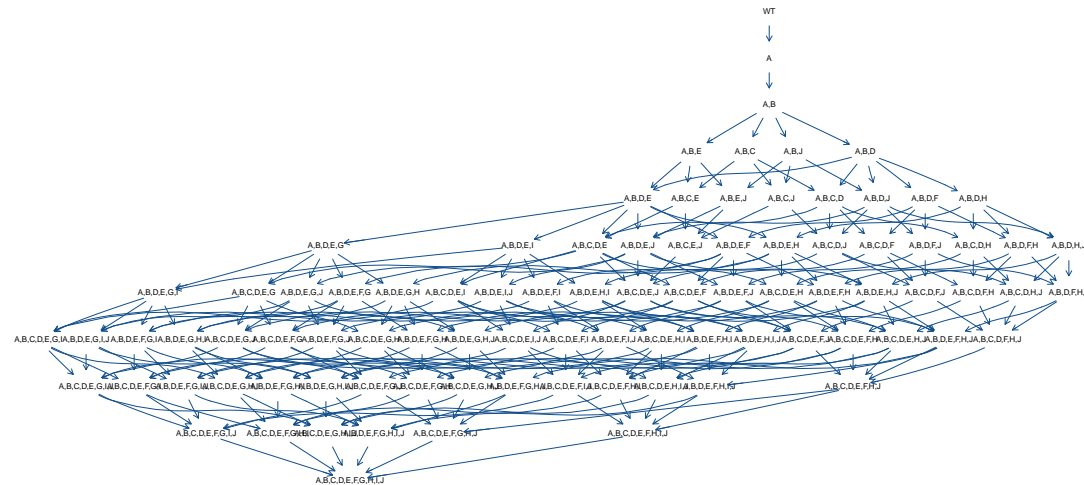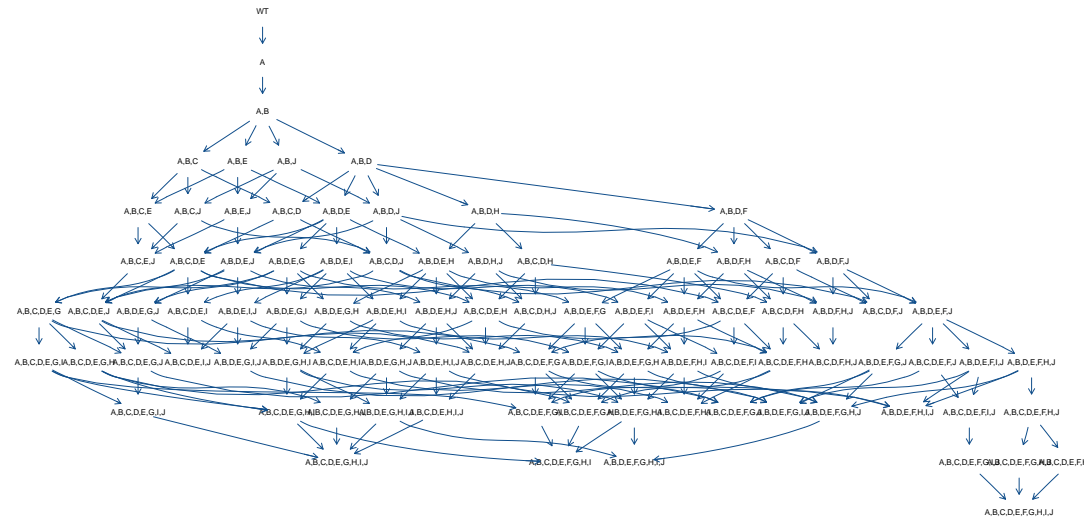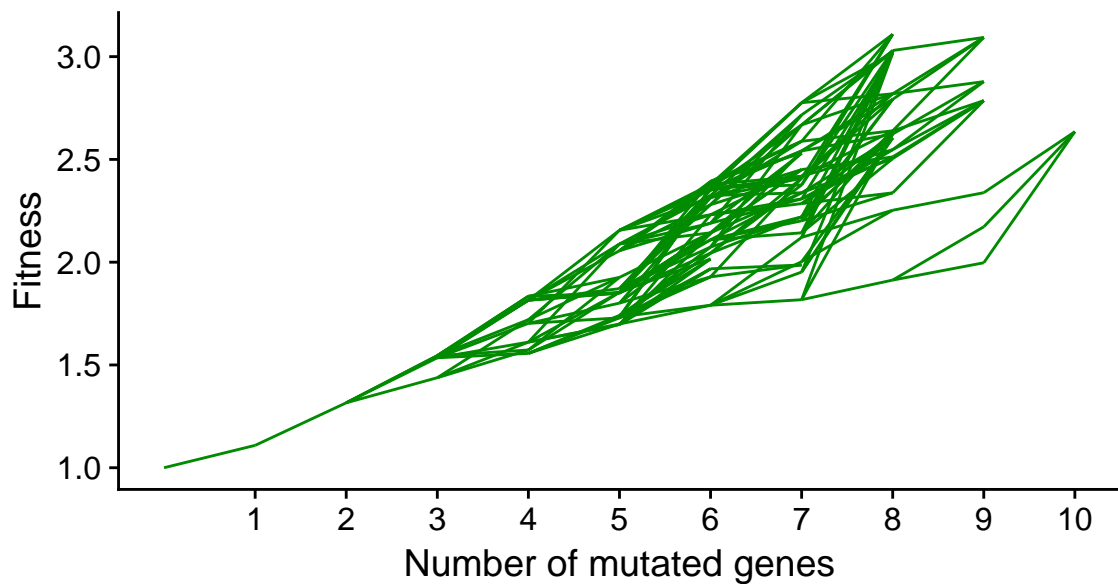



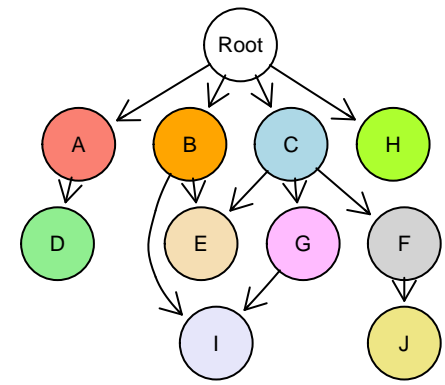

*ID* giZLyxZUhrKmiuln  
*acc genotypes* 156  
*peaks no back* 15  
*removed edges* 101  
*prop rem edges* 0.212

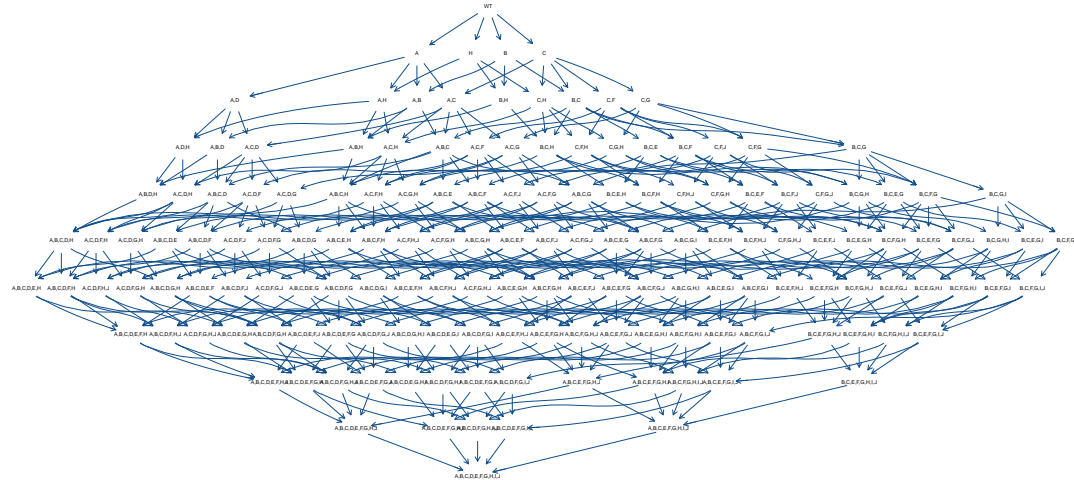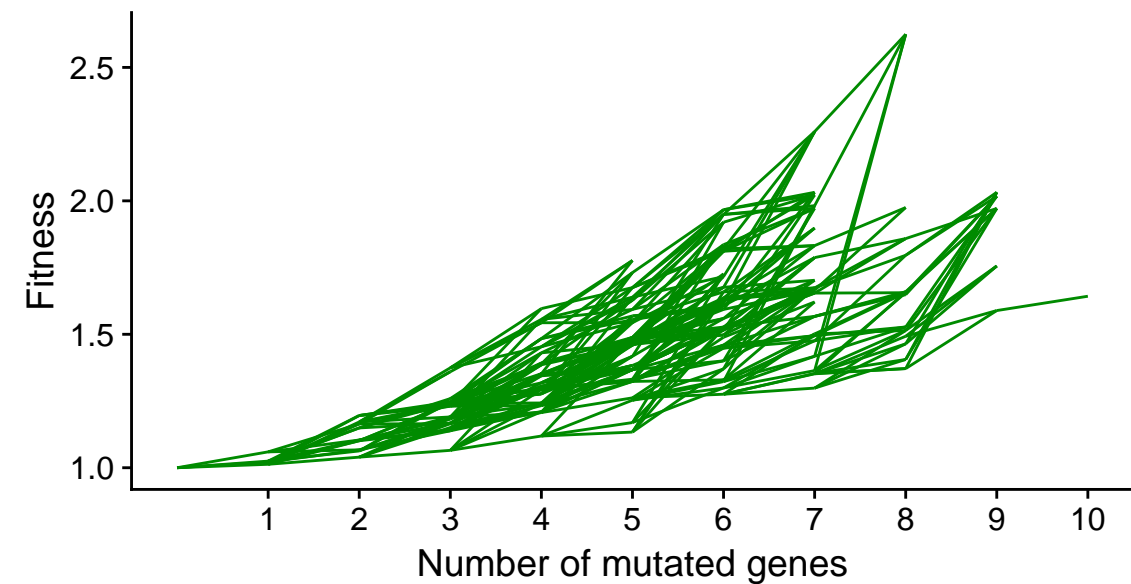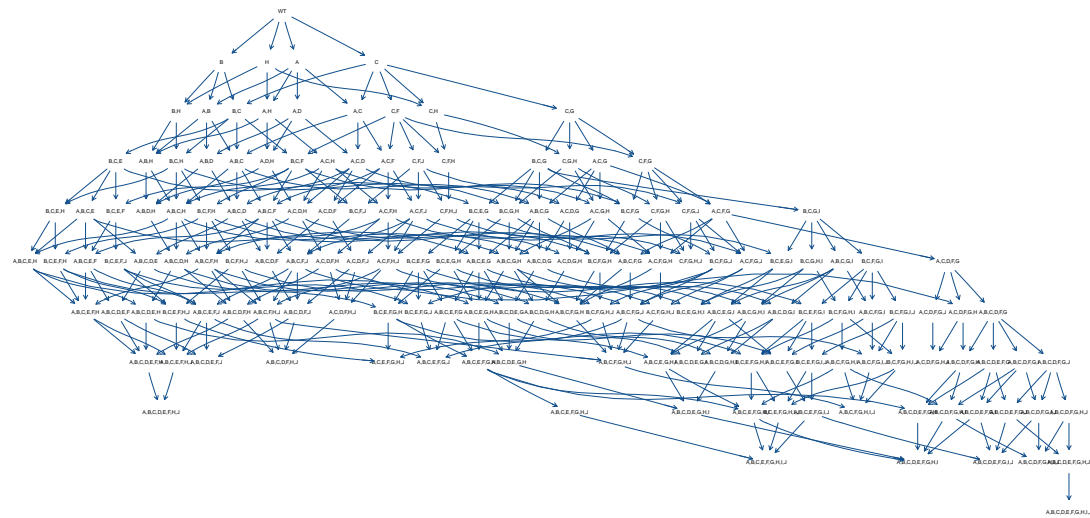

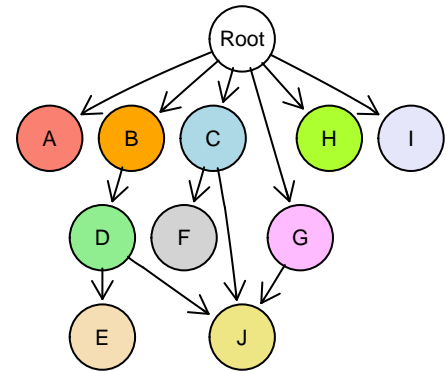

ID [gIDXei6qj95q3lss](#)  
 acc genotypes **224**  
 peaks no back 18  
 removed edges 174  
 prop rem edges 0.227

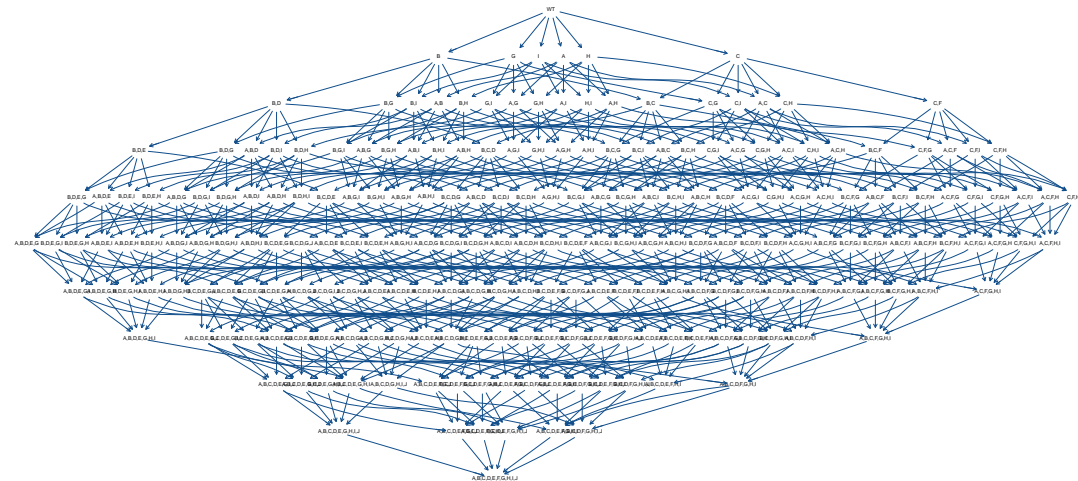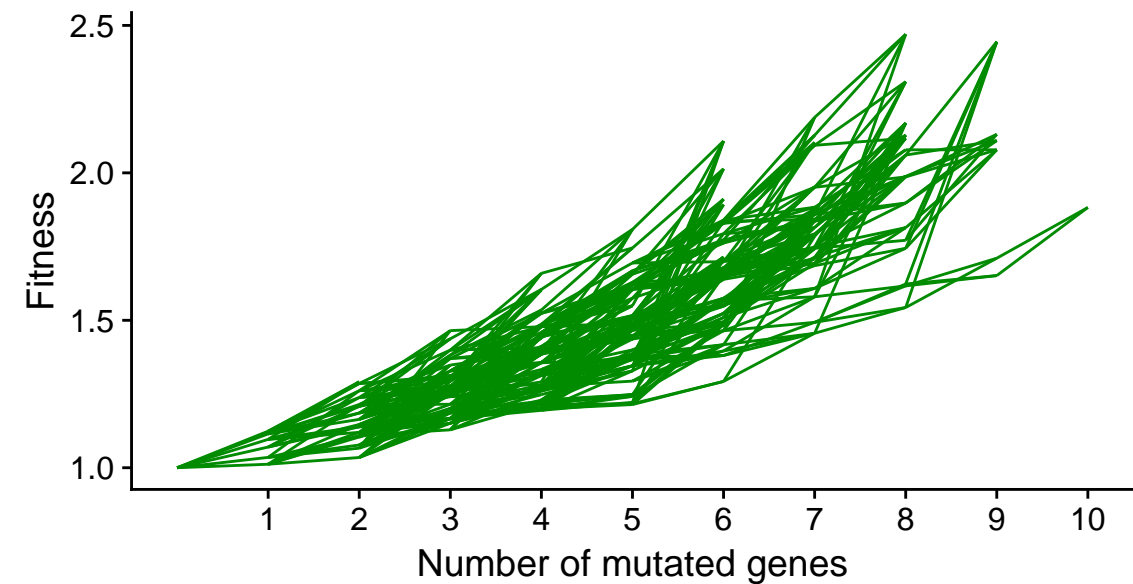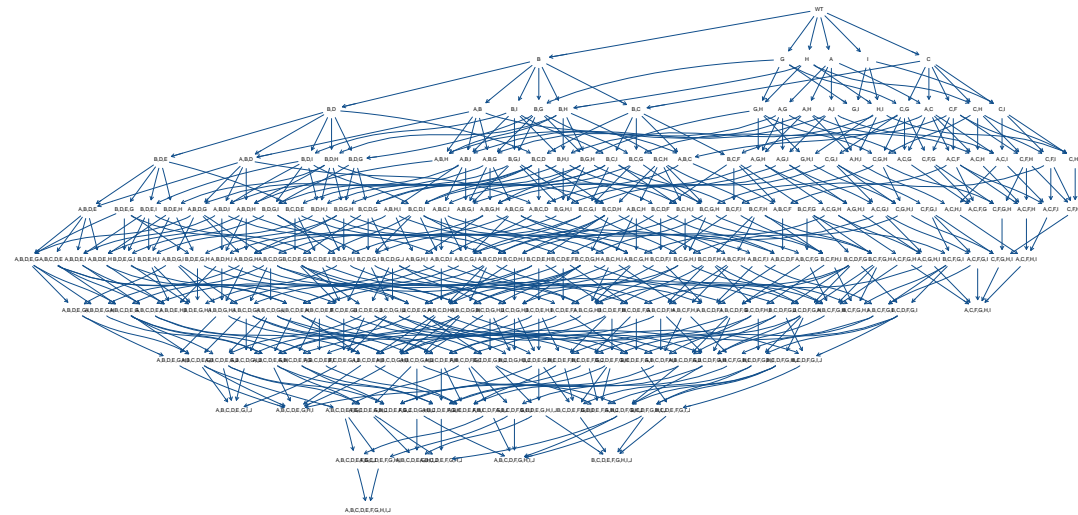

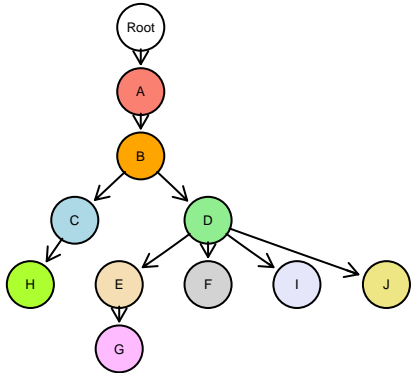

ID gnxoxbzJ9TsWIPFr  
 acc genotypes 77  
 peaks no back 9  
 removed edges 45  
 prop rem edges 0.213

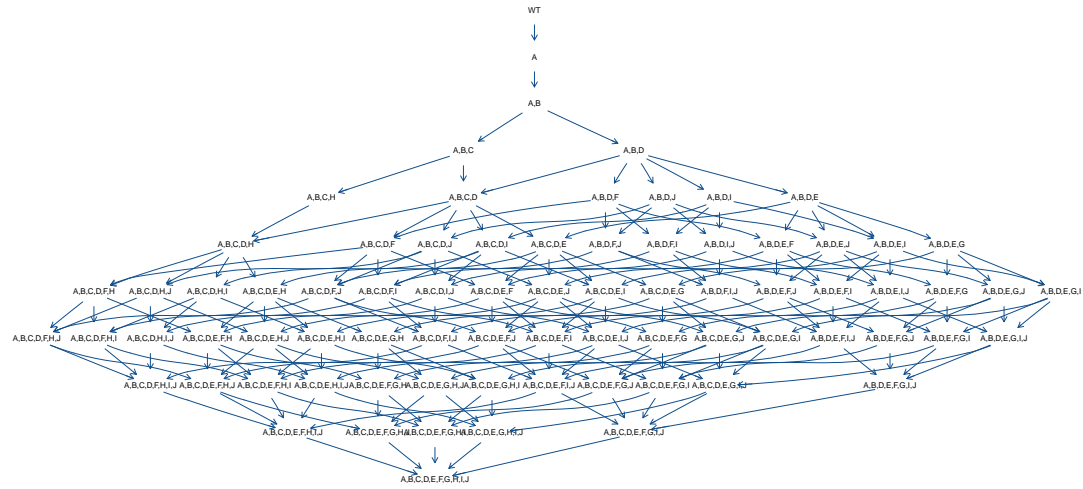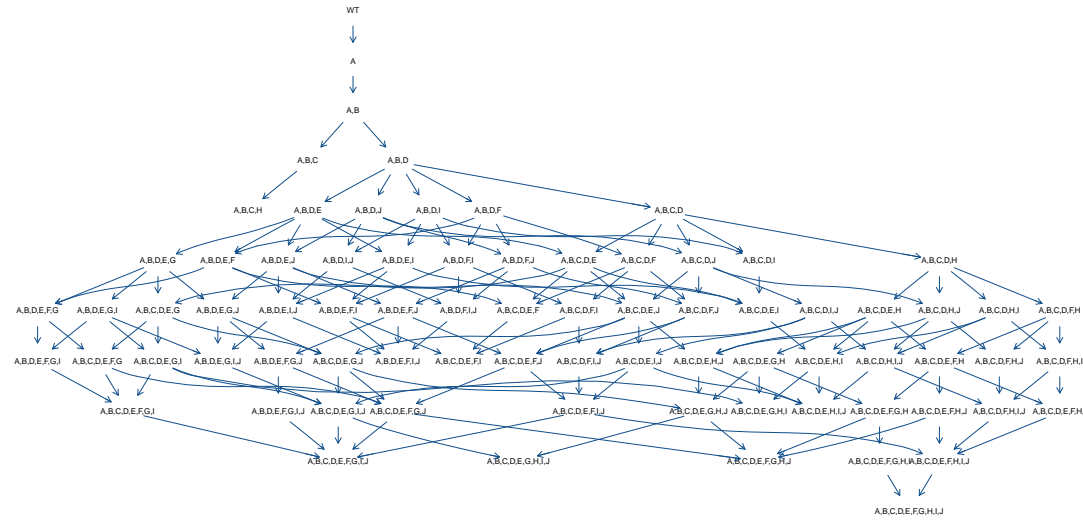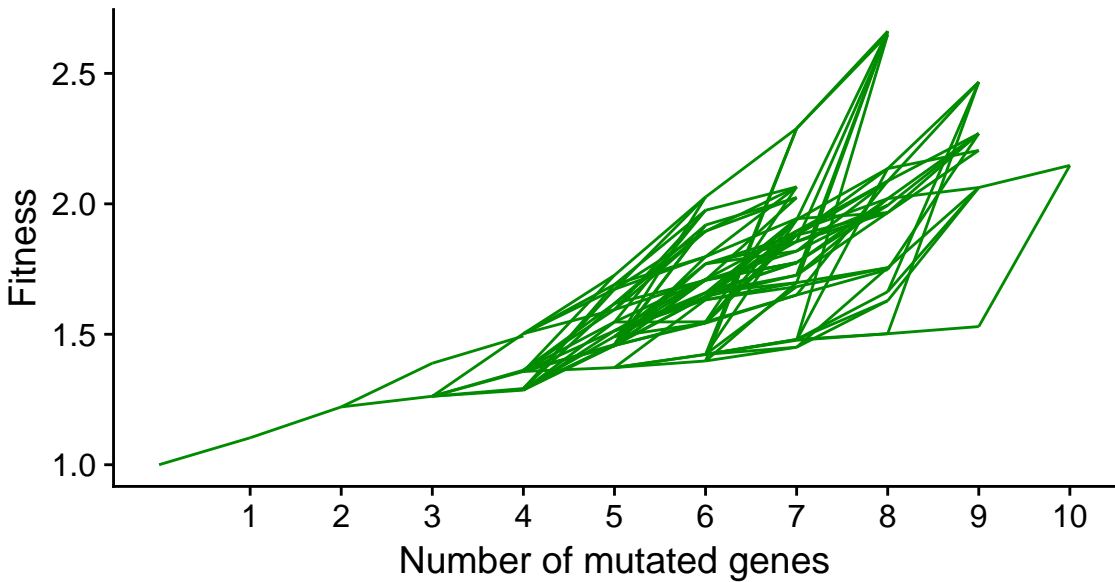

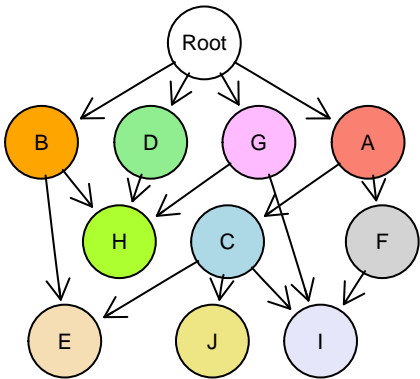

ID **Gw7Lw136jeS105BFu**  
 acc genotypes **99**  
 peaks no back **6**  
 removed edges **44**  
 prop rem edges **0.165**

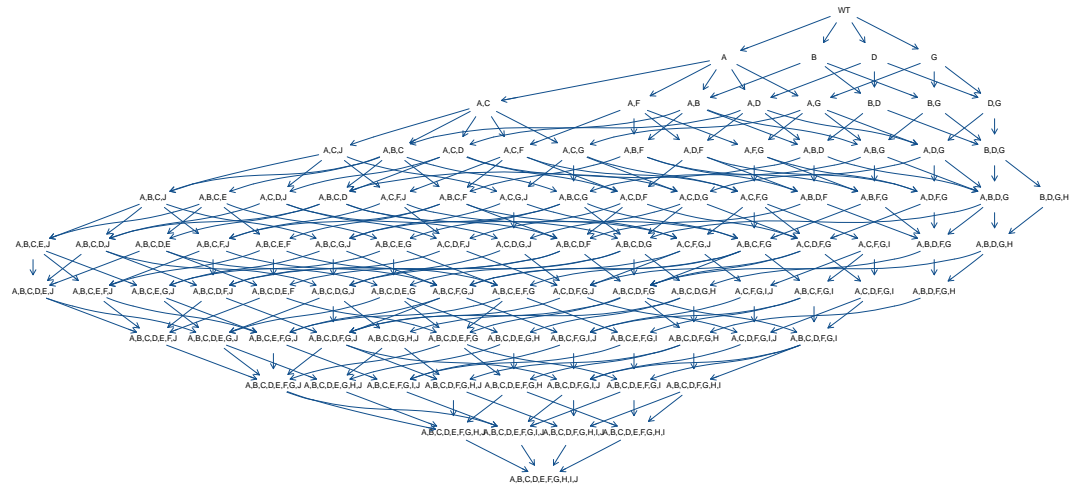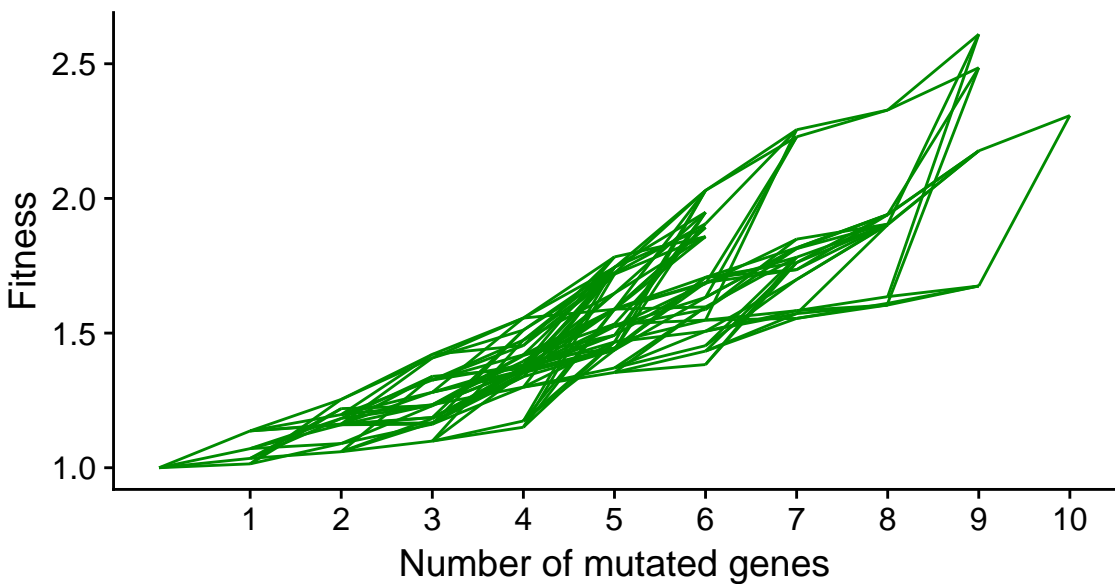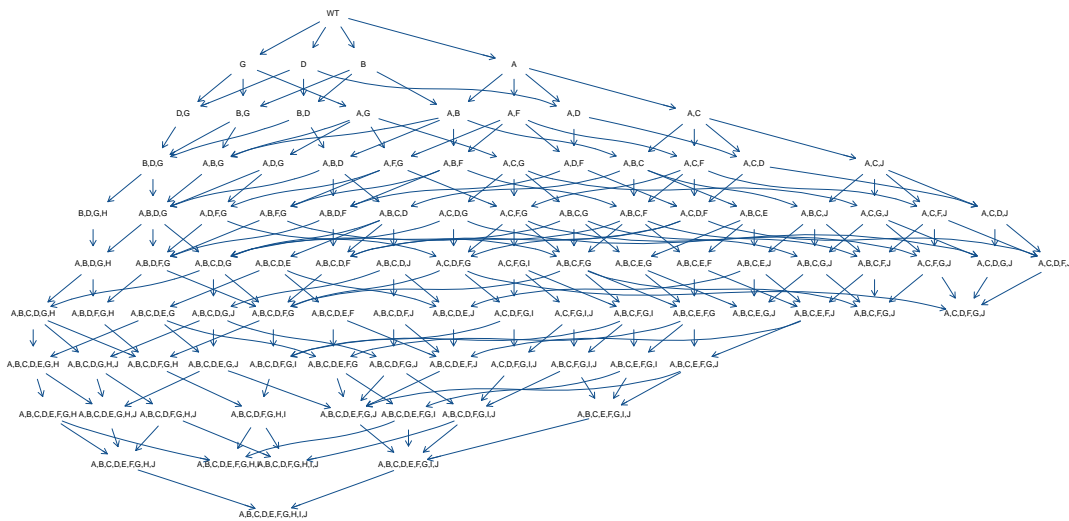

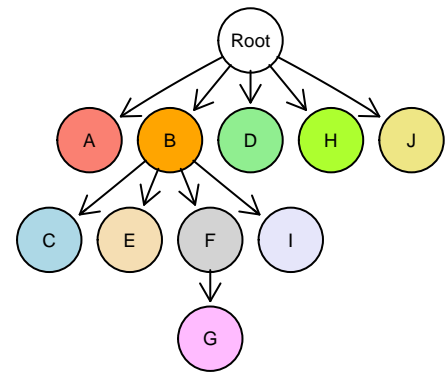

*ID* hEMMzV7G9fteqwr  
*acc genotypes* 400  
*peaks no back* 24  
*removed edges* 307  
*prop rem edges* 0.186

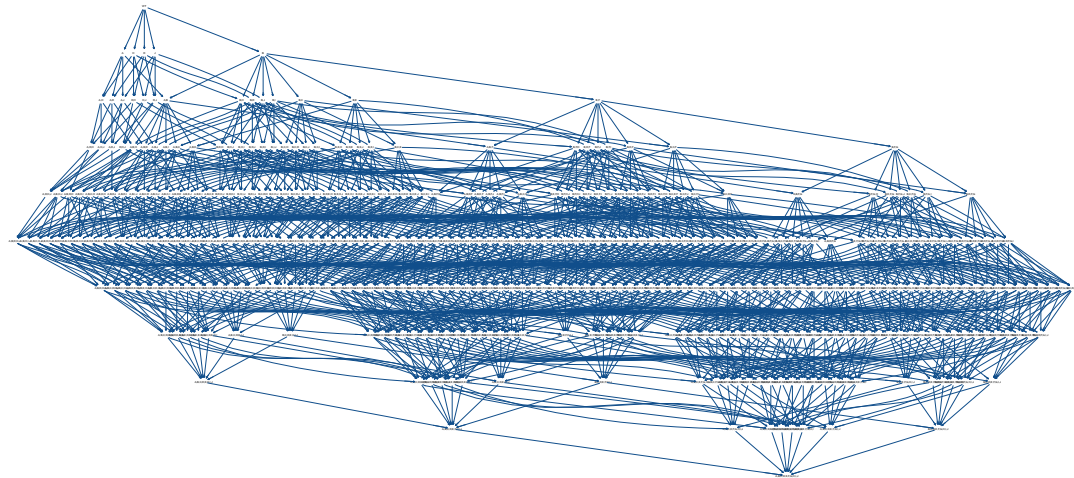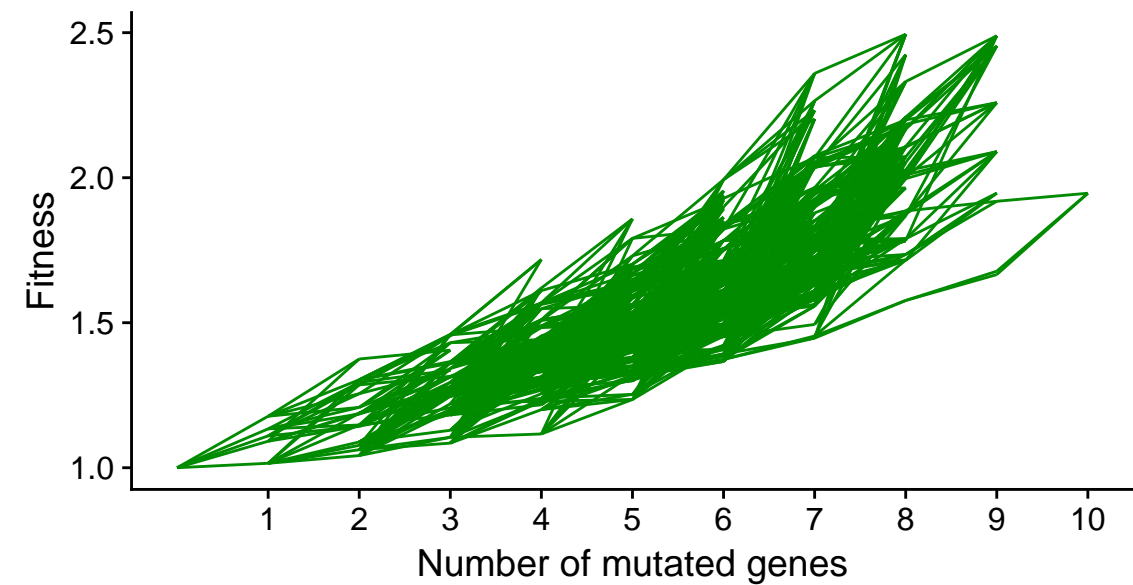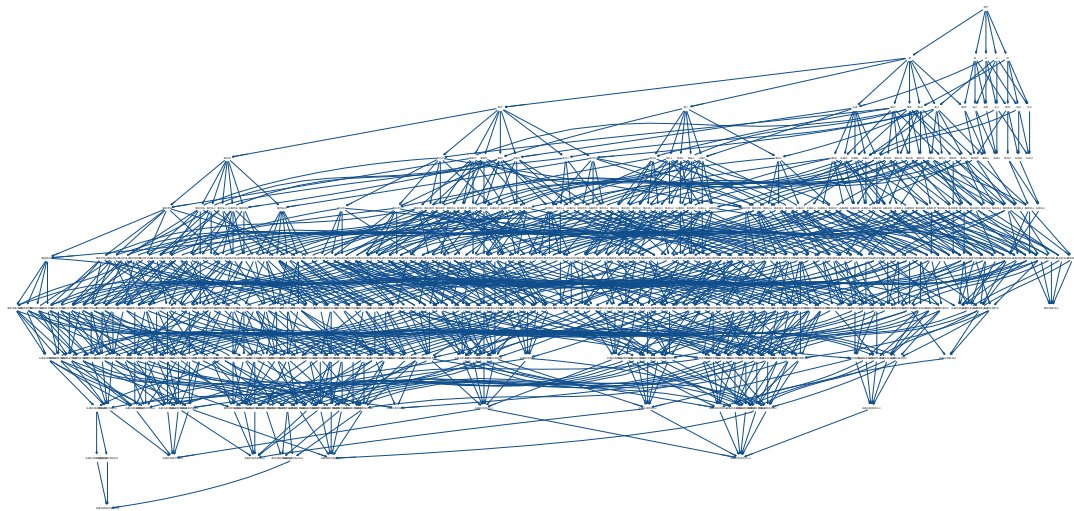

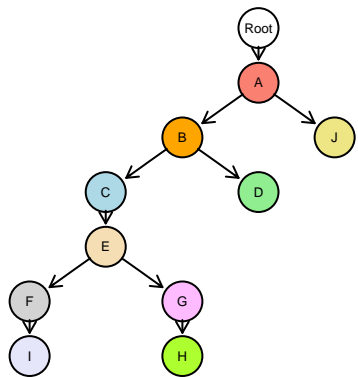

ID **HJf8BvCZrOXnhdpP**  
 acc genotypes **47**  
 peaks no back **5**  
 removed edges **21**  
 prop rem edges **0.202**

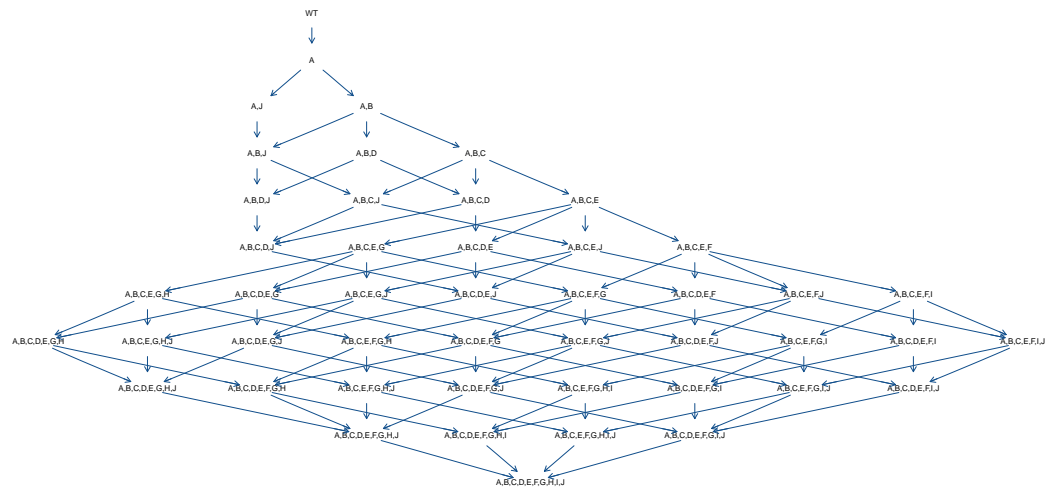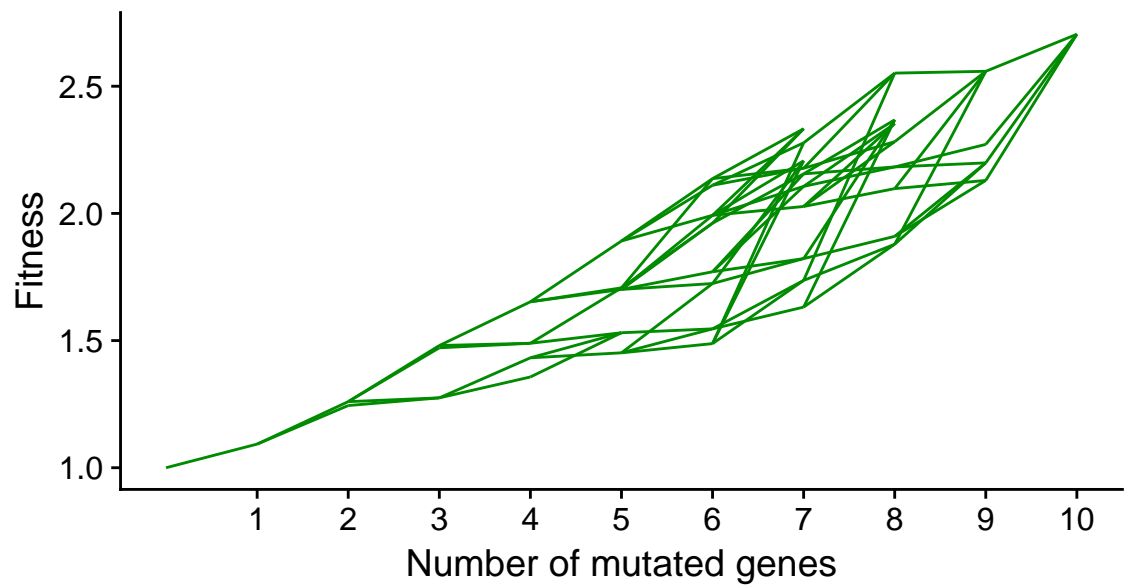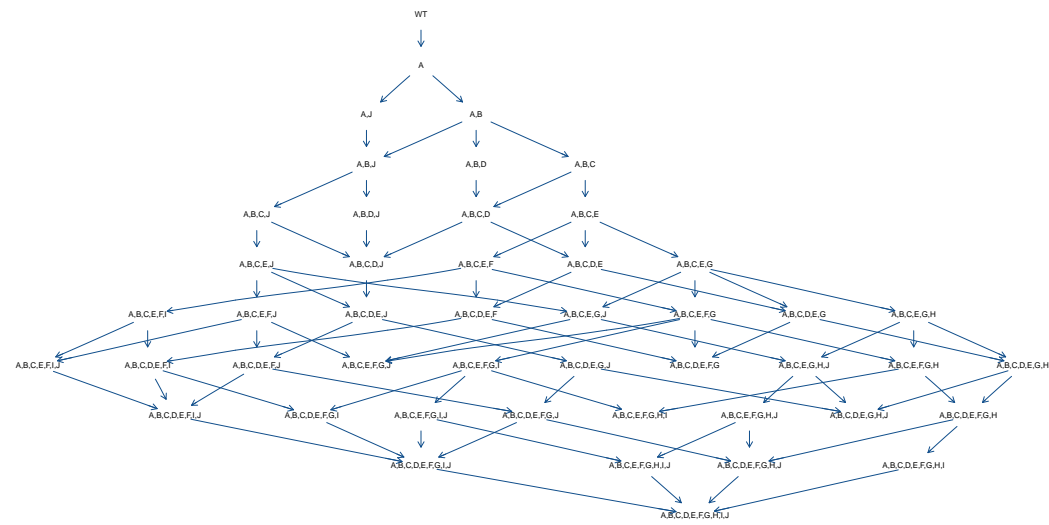

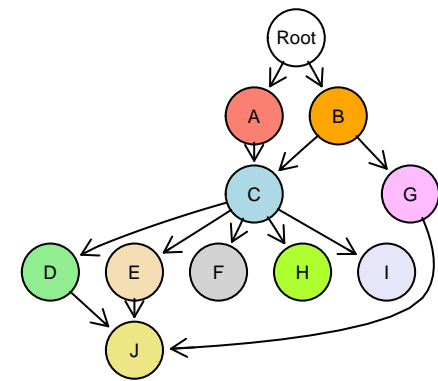

ID **hjGRWsJhOh106RXPY**  
 acc genotypes **78**  
 peaks no back **8**  
 removed edges **48**  
 prop rem edges **0.217**

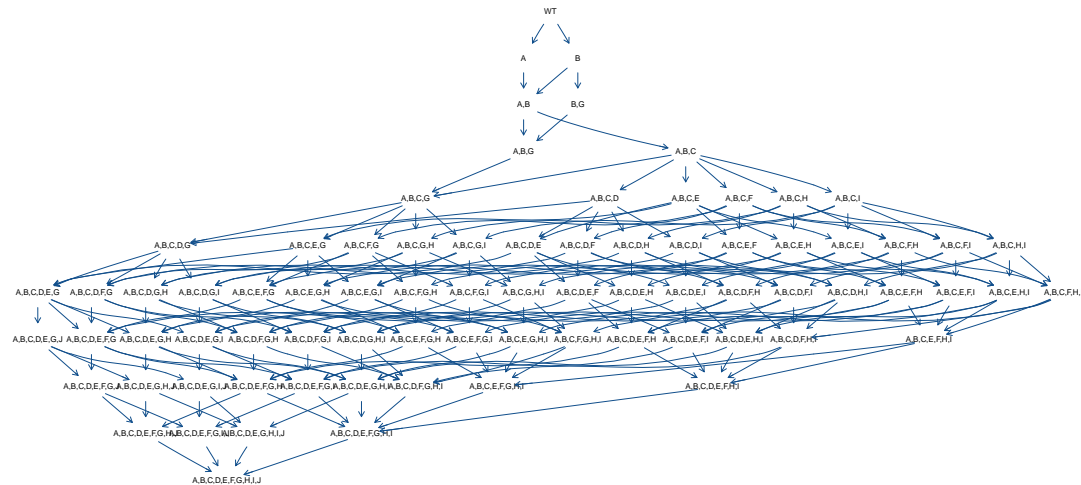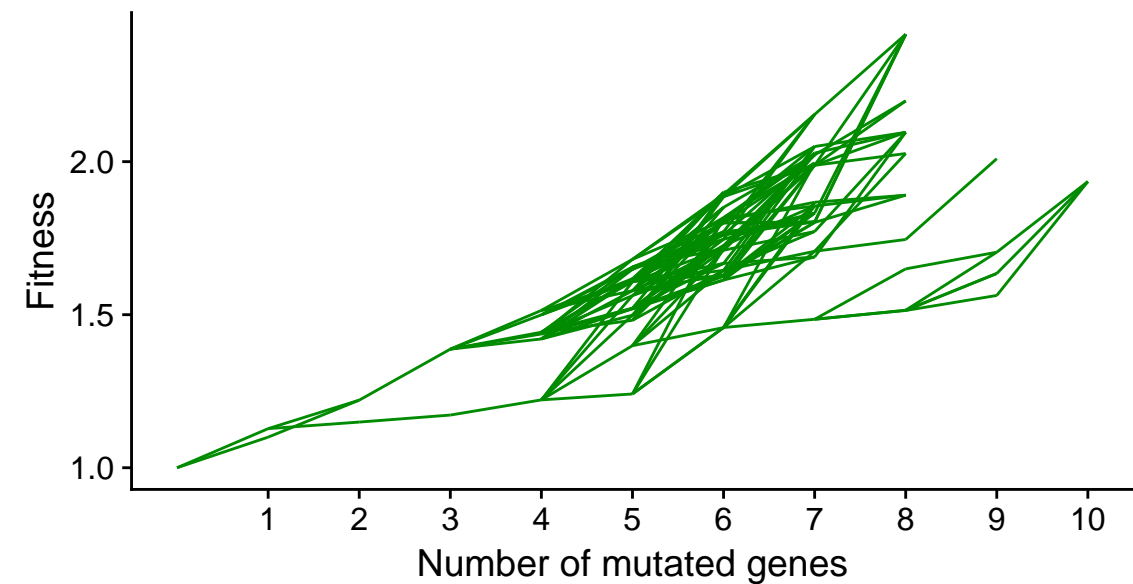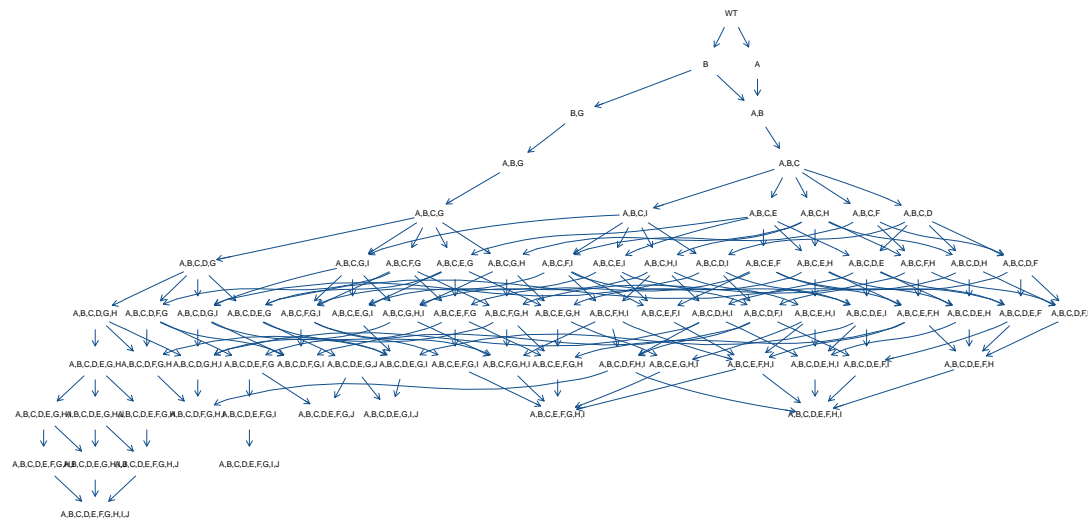

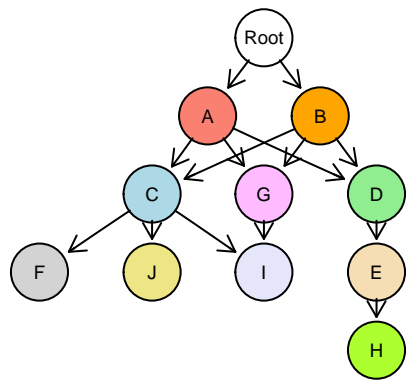

ID **HjmKaDaJUp3CbAMd**  
 acc genotypes **59**  
 peaks no back **9**  
 removed edges **21**  
 prop rem edges **0.152**

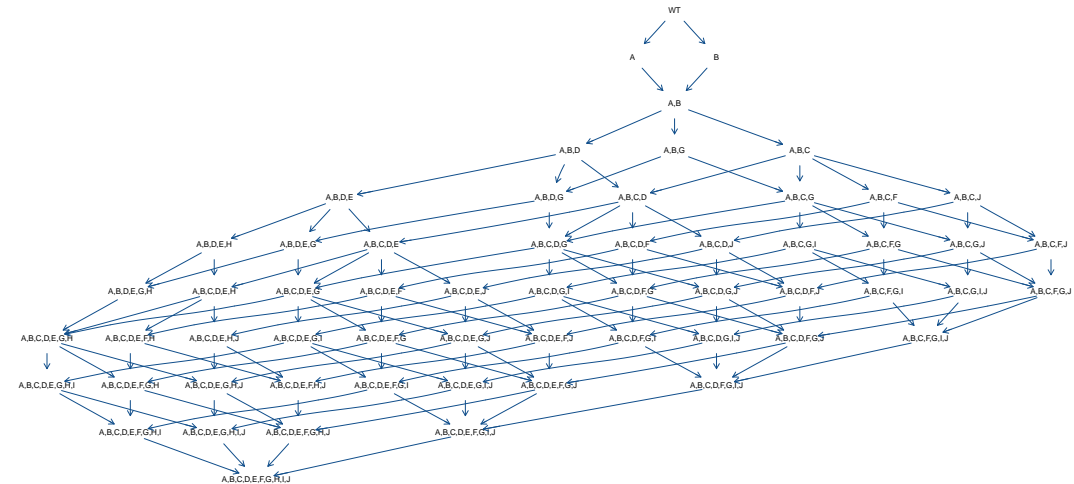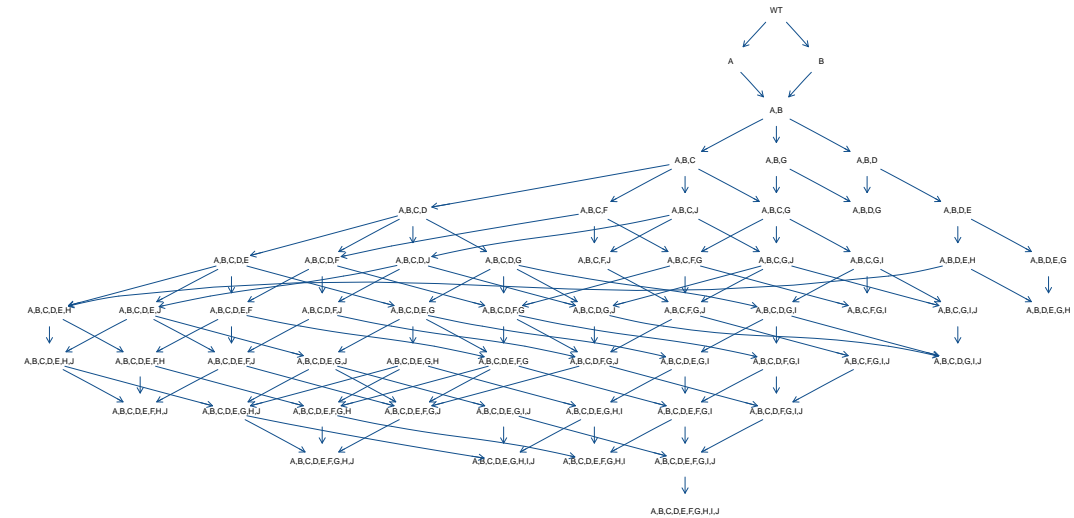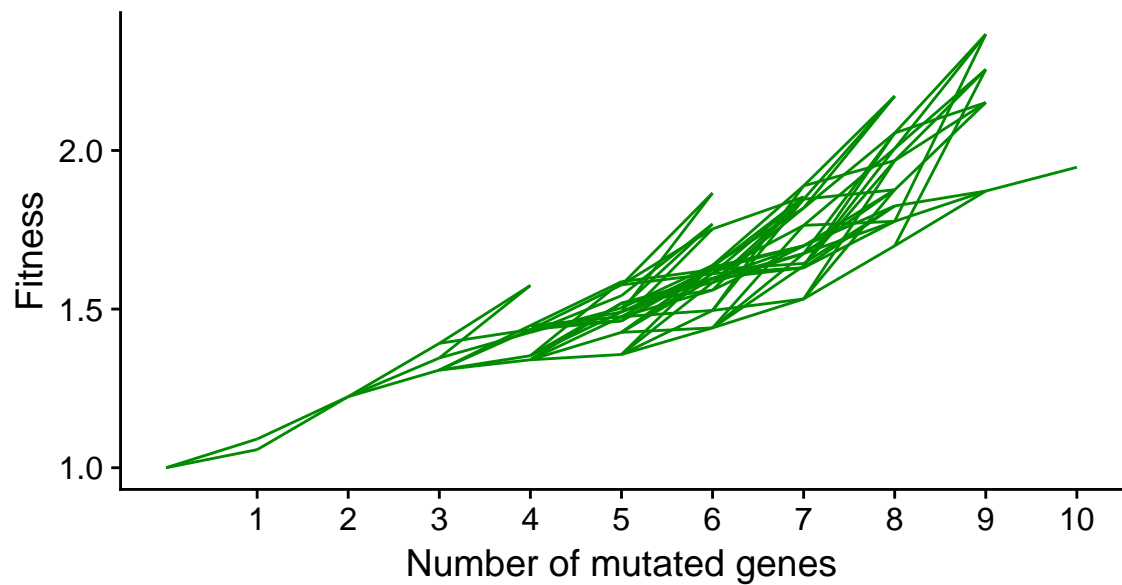



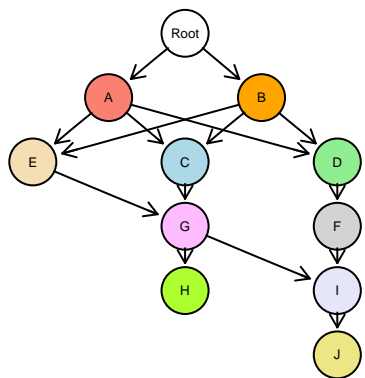

ID **hootgr4D2eT9wPQw**  
 acc genotypes **25**  
 peaks no back 2  
 removed edges 3  
 prop rem edges 0.075

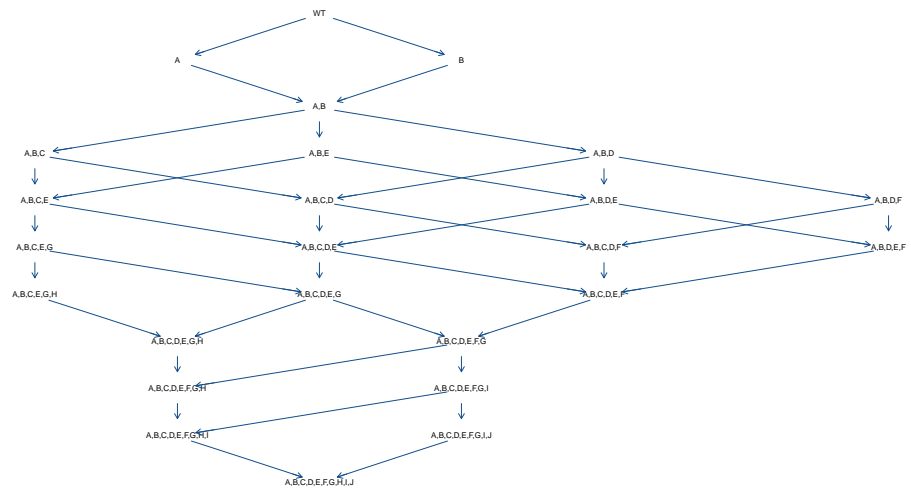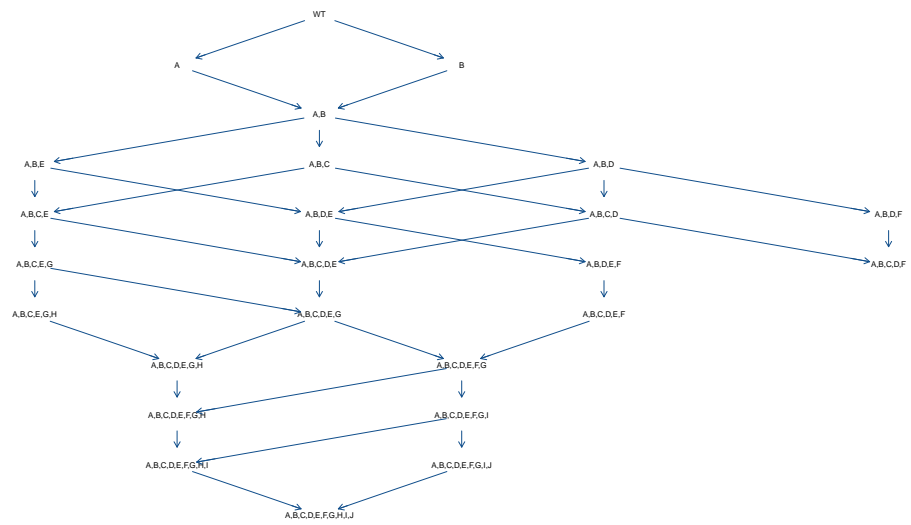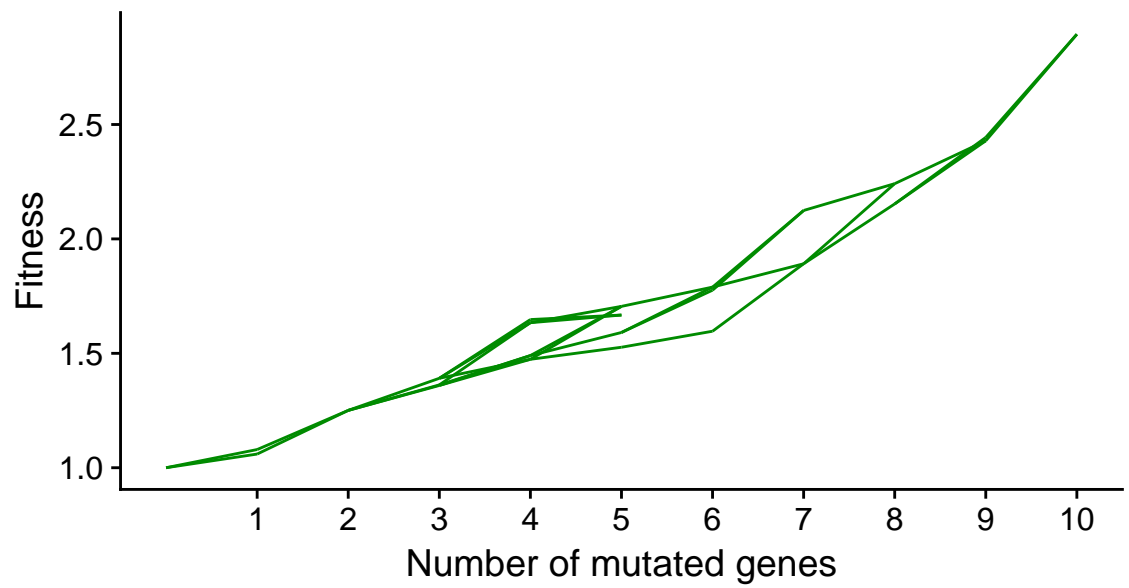

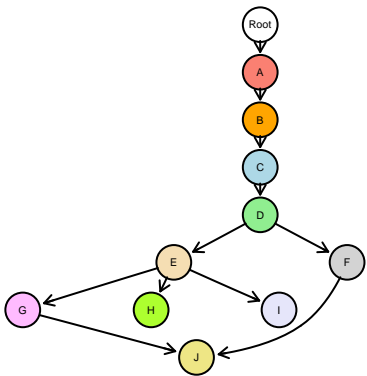

ID **i210cnkWHYkaWwl3I**  
 acc genotypes **26**  
 peaks no back **4**  
 removed edges **7**  
 prop rem edges **0.149**

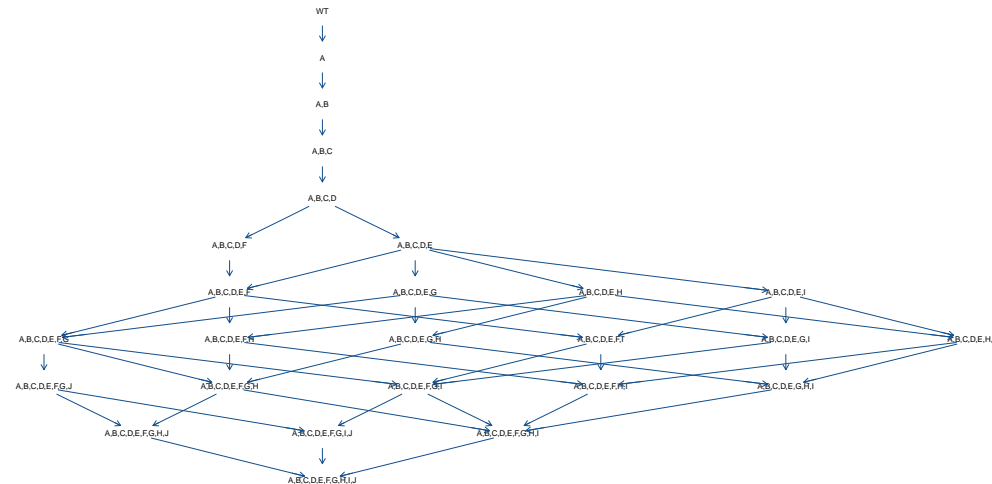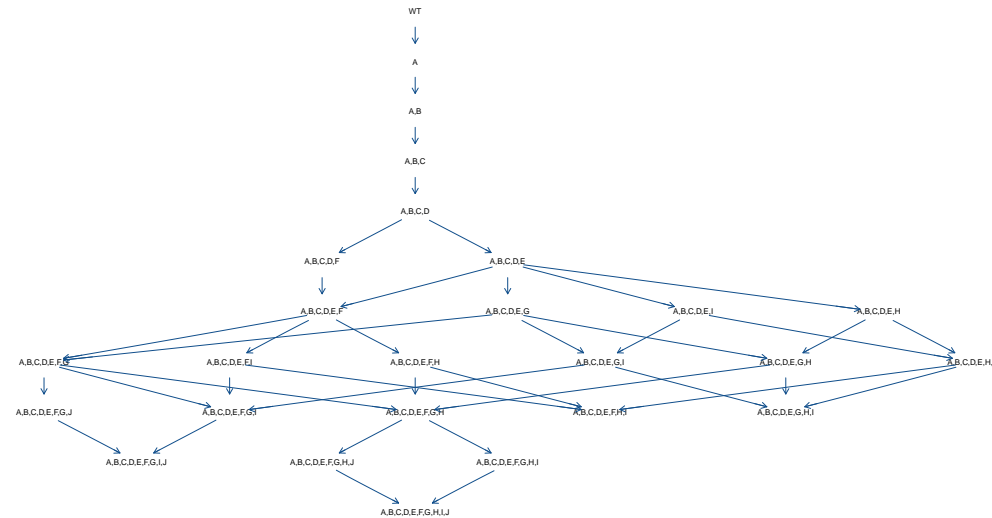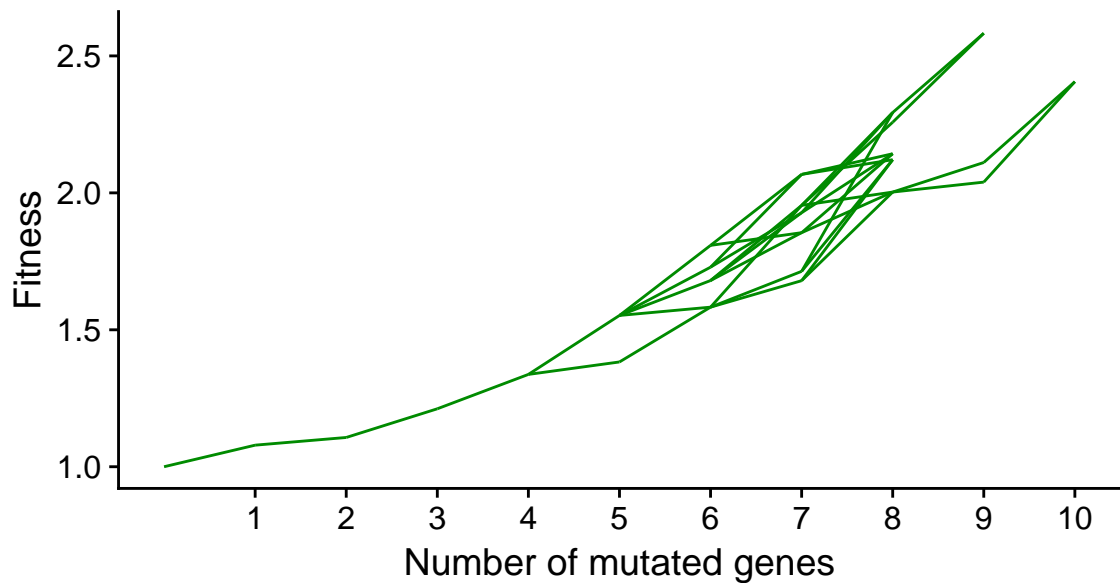

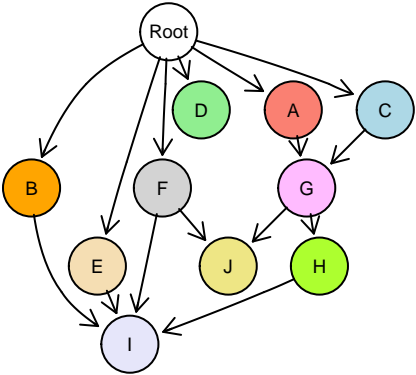

*ID* 19aZnfSBnGVPEGvO  
*acc genotypes* 116  
*peaks no back* 14  
*removed edges* 89  
*prop rem edges* 0.259

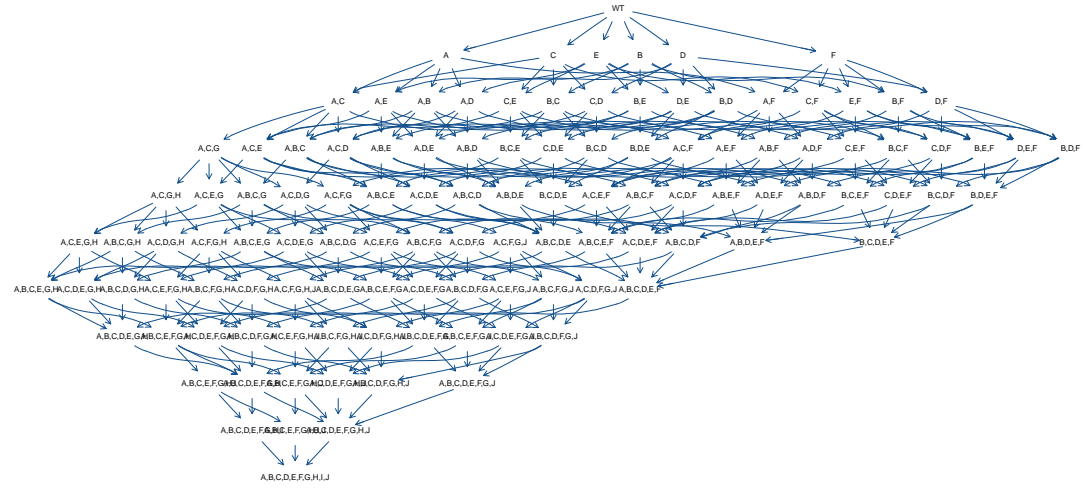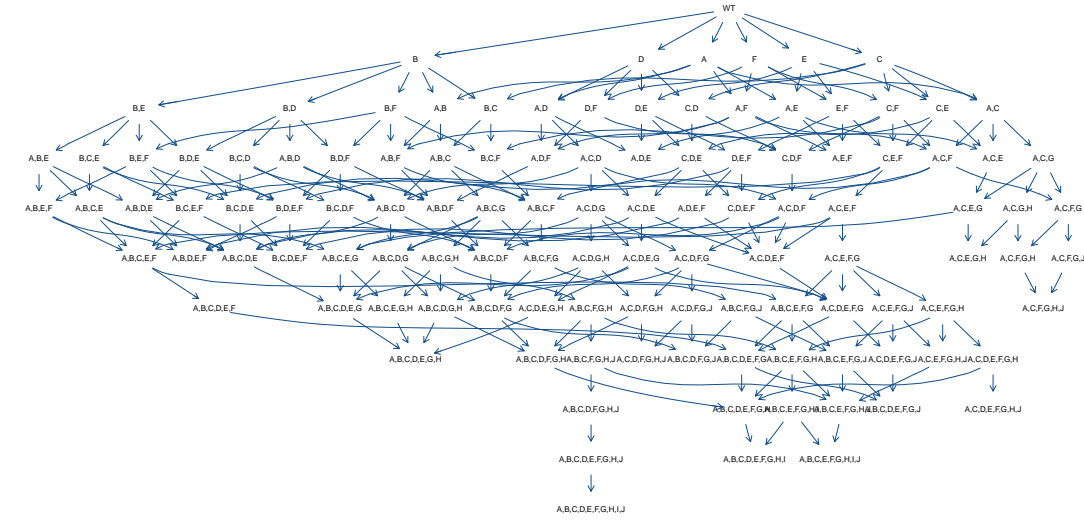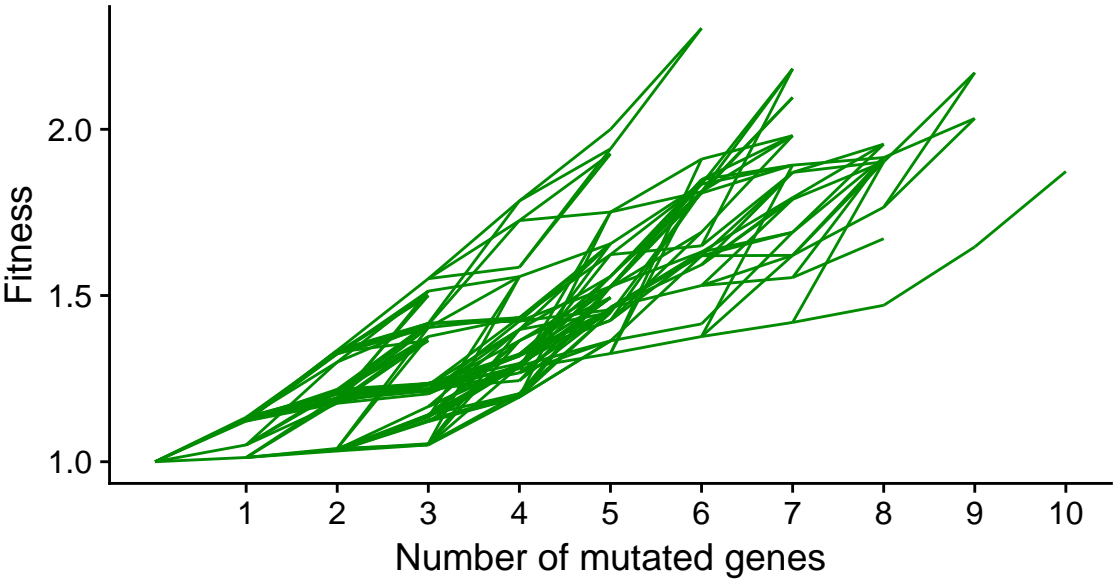

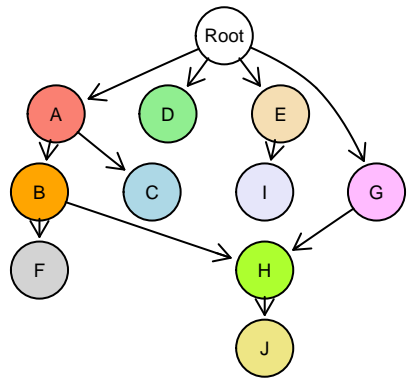

*ID*    **ibcyCqVRdZgkjmP**  
*acc genotypes*    **132**  
*peaks no back*    **13**  
*removed edges*    **62**  
*prop rem edges*    **0.16**

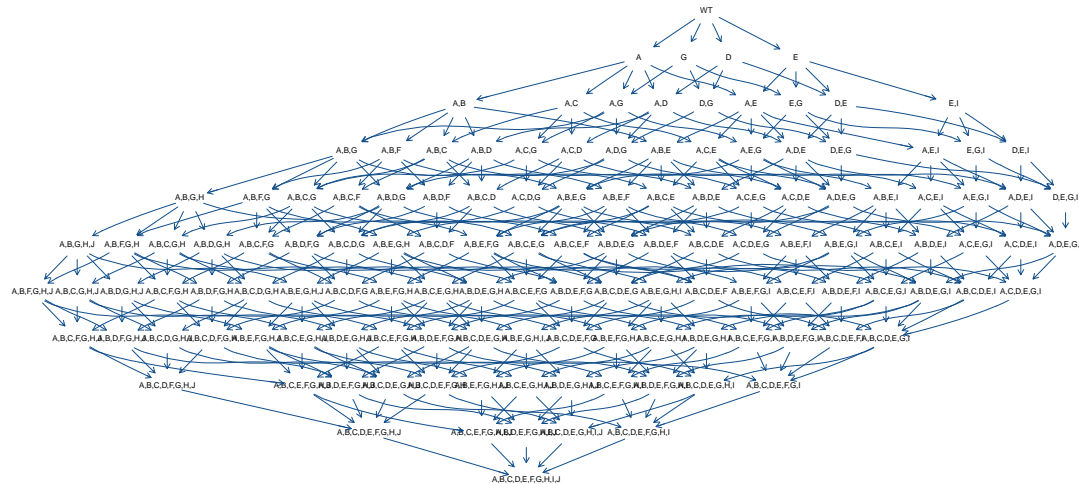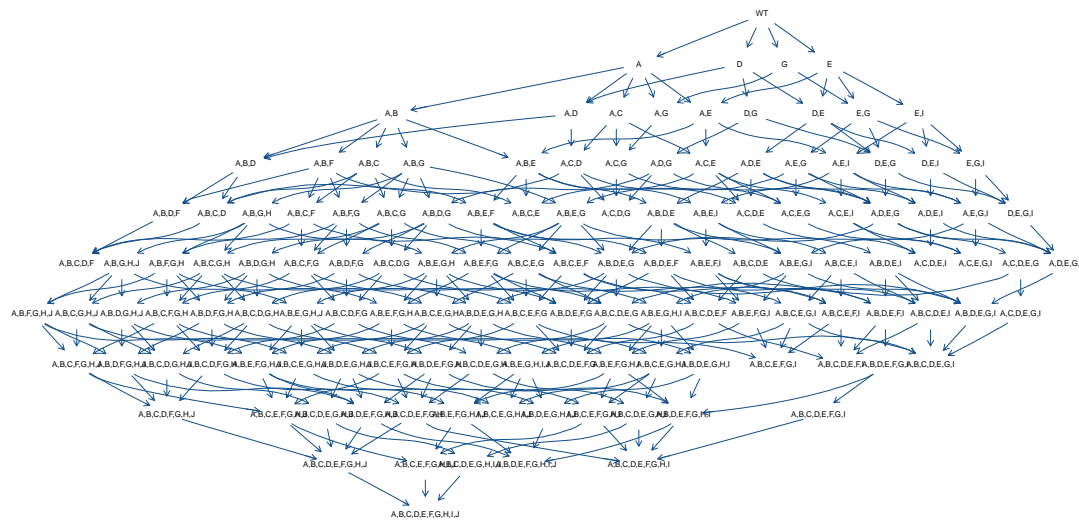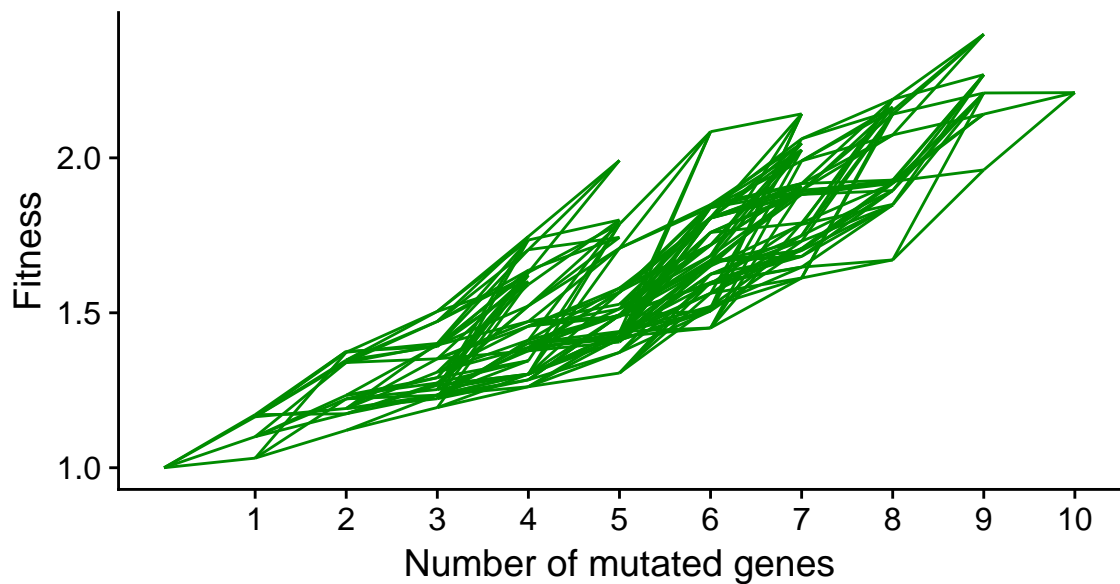

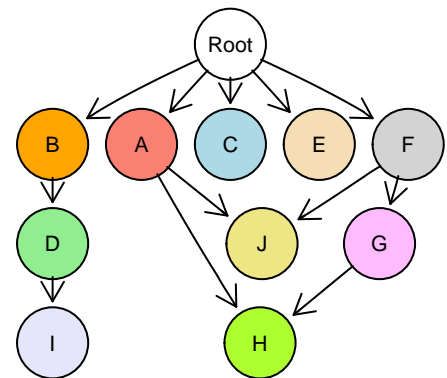

ID **Ihbe9R5g4X8LVErf**  
 acc genotypes **160**  
 peaks no back **12**  
 removed edges **76**  
 prop rem edges **0.156**

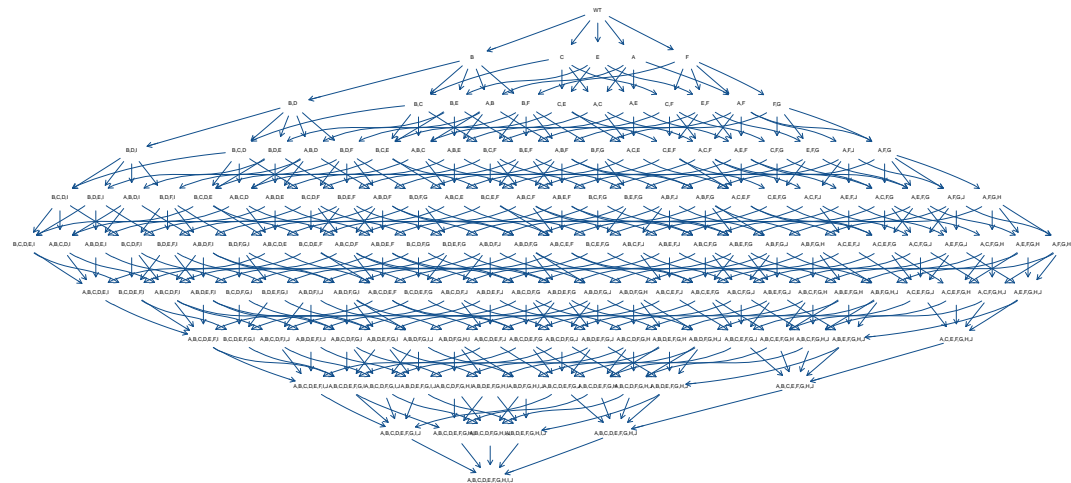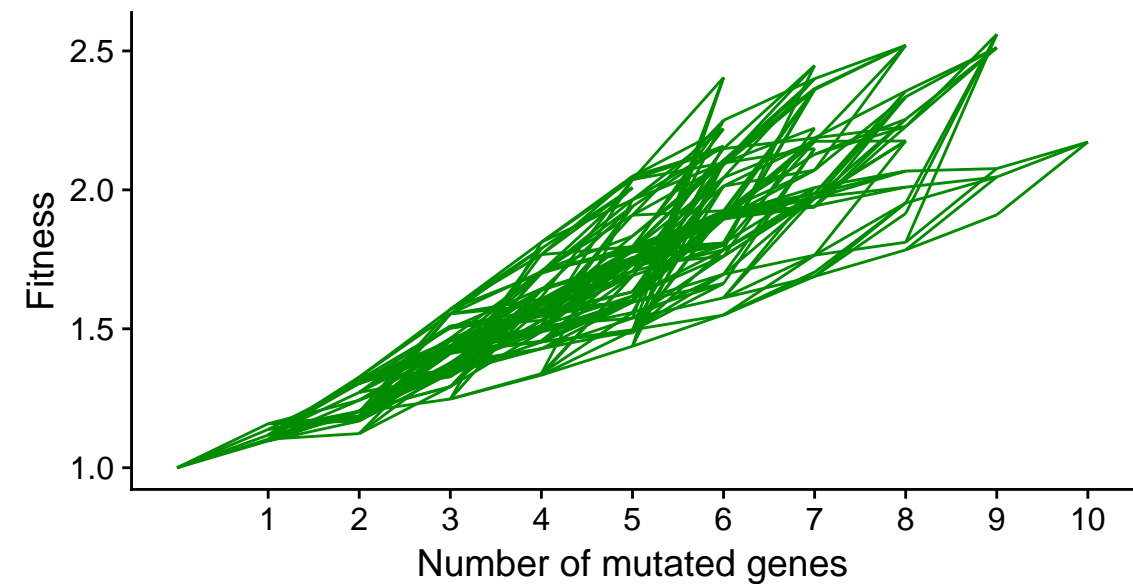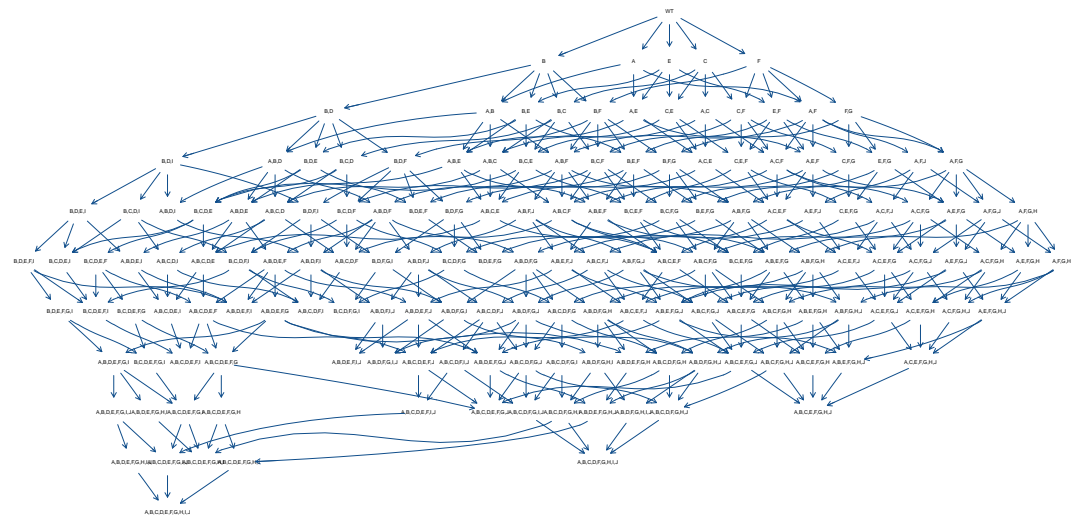

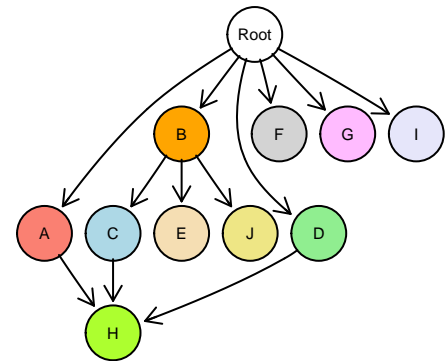

|                       |                   |
|-----------------------|-------------------|
| <i>ID</i>             | IJHDmeIG9vA10Rtnv |
| <i>acc genotypes</i>  | 320               |
| <i>peaks no back</i>  | 21                |
| <i>removed edges</i>  | 305               |
| <i>prop rem edges</i> | 0.244             |

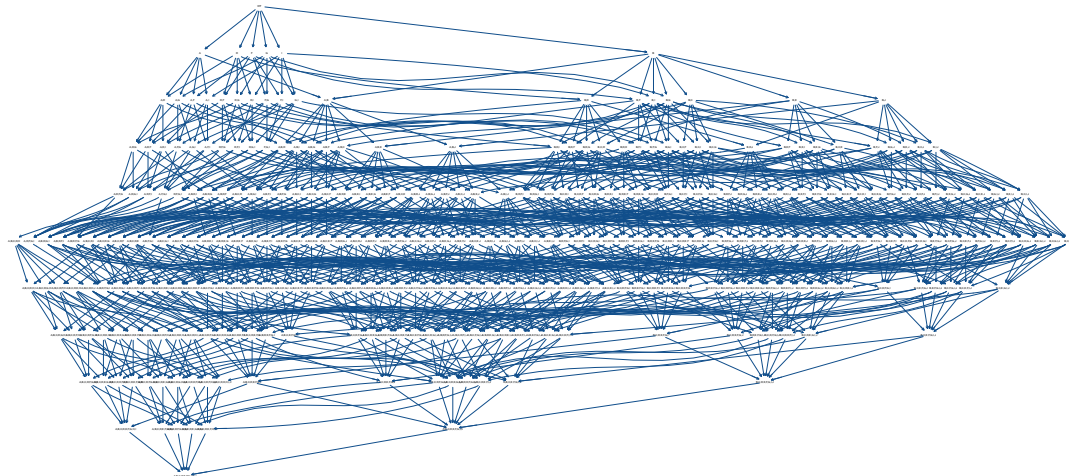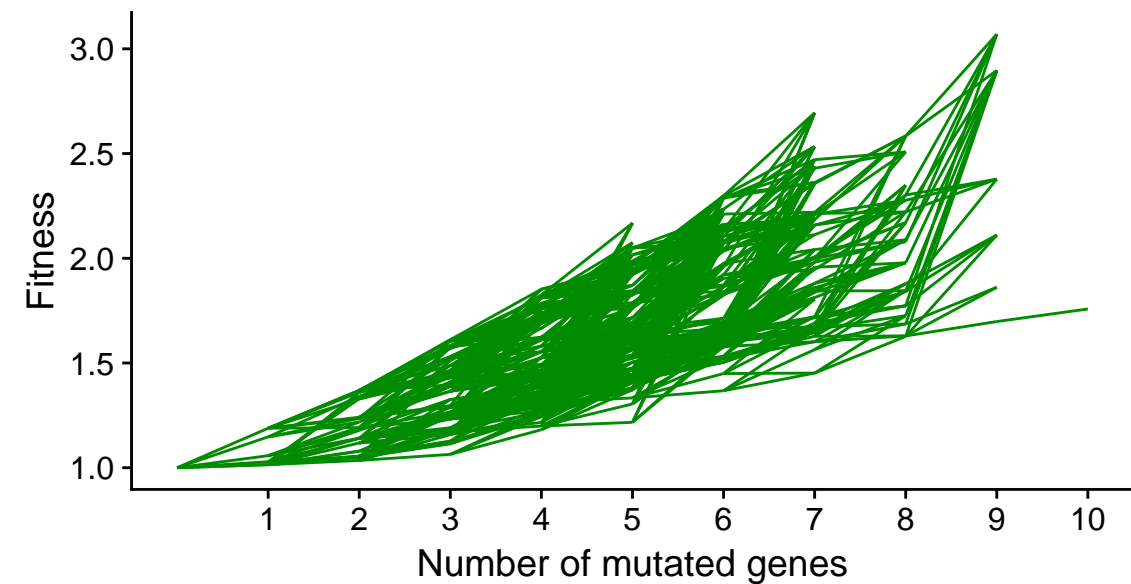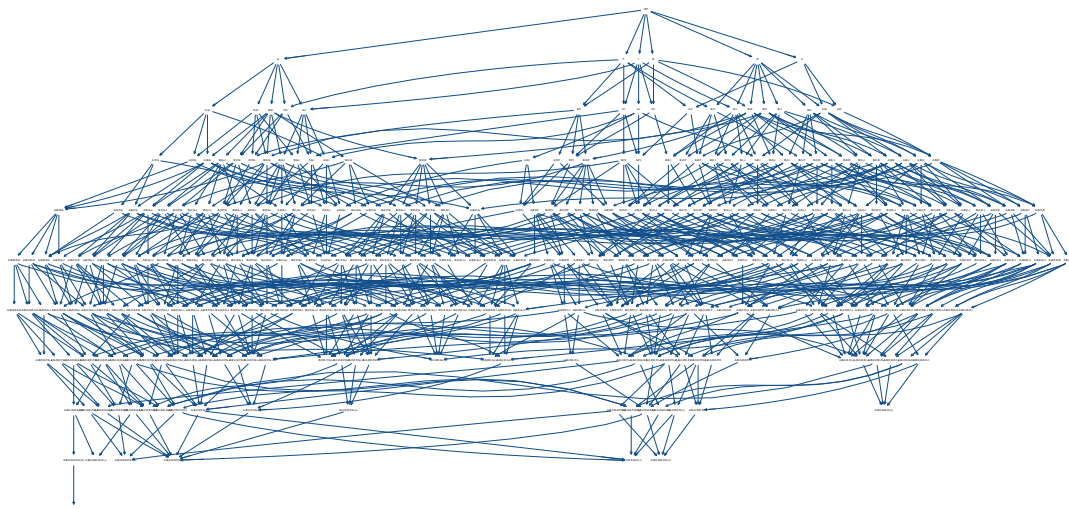

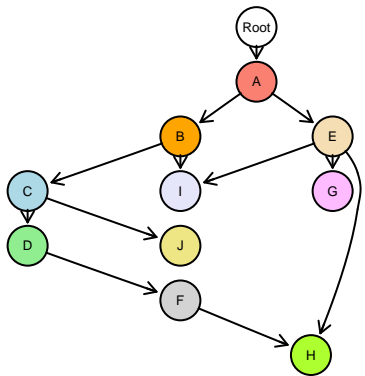

ID InQKKeVbAQbH5g2SM  
 acc genotypes 47  
 peaks no back 7  
 removed edges 18  
 prop rem edges 0.178

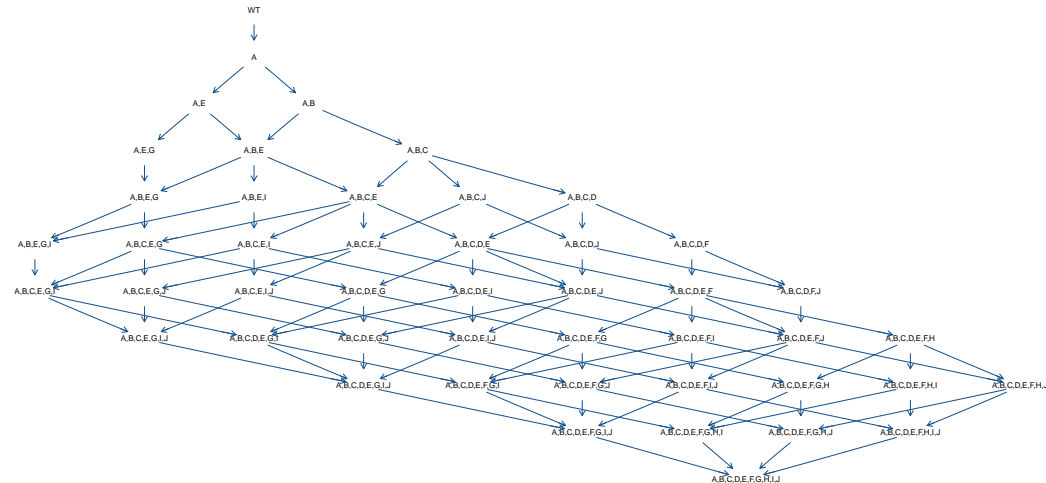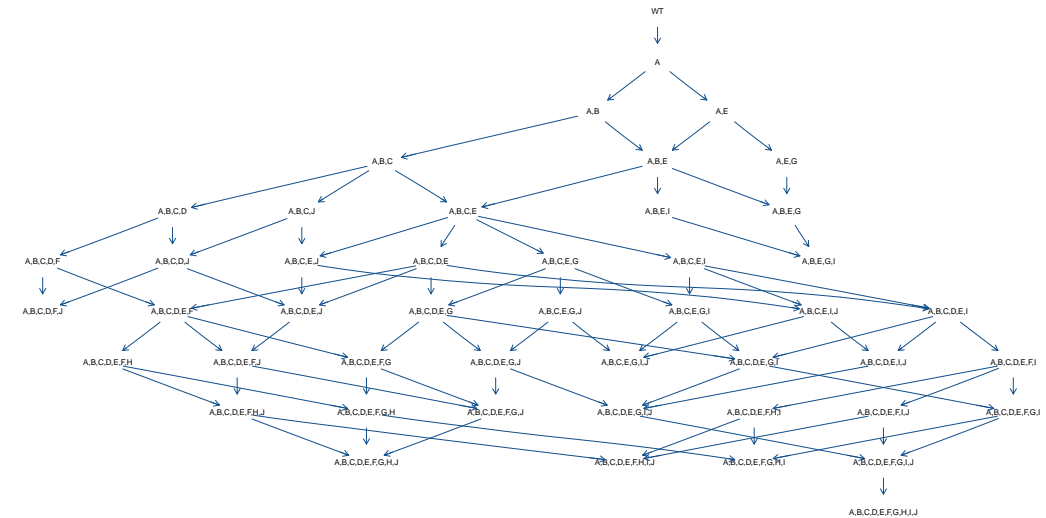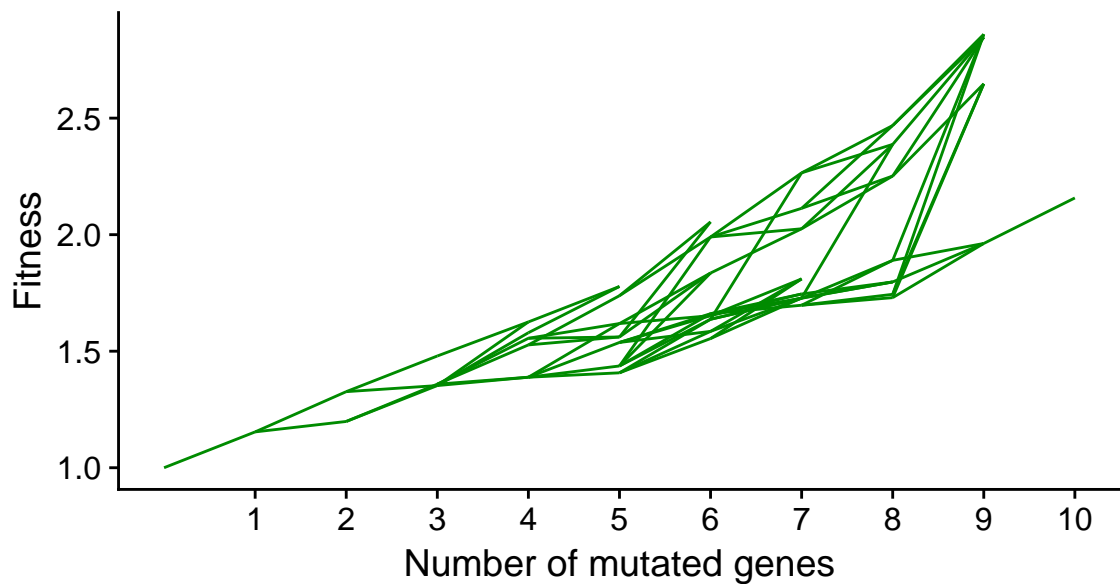

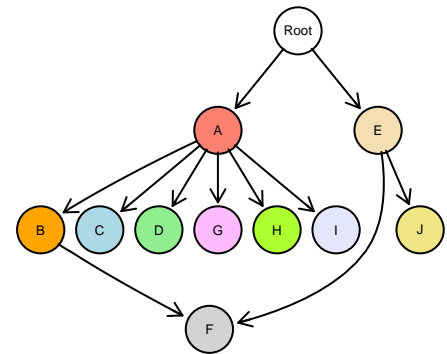

*ID* [iudi9ykQn8Kp10Gil](#)  
*acc genotypes* 259  
*peaks no back* 19  
*removed edges* 140  
*prop rem edges* 0.145

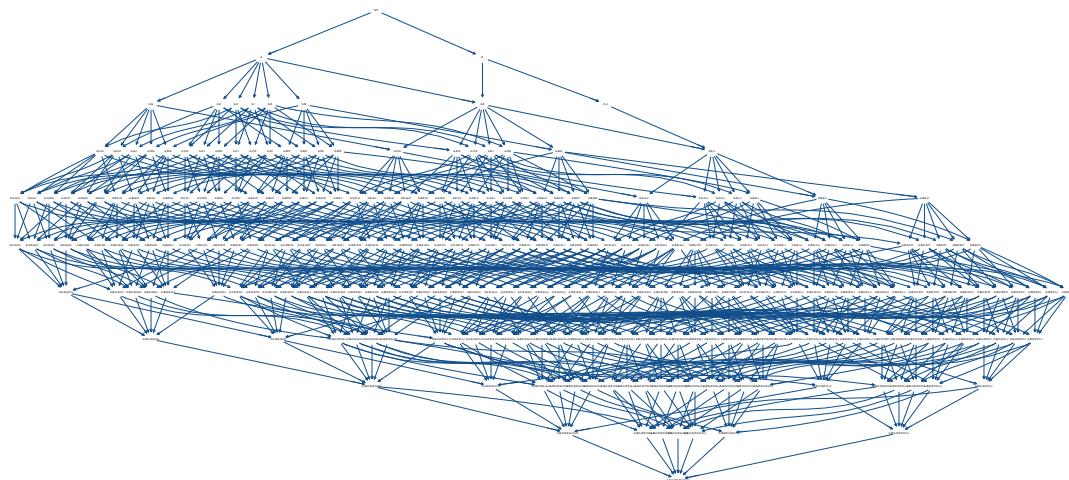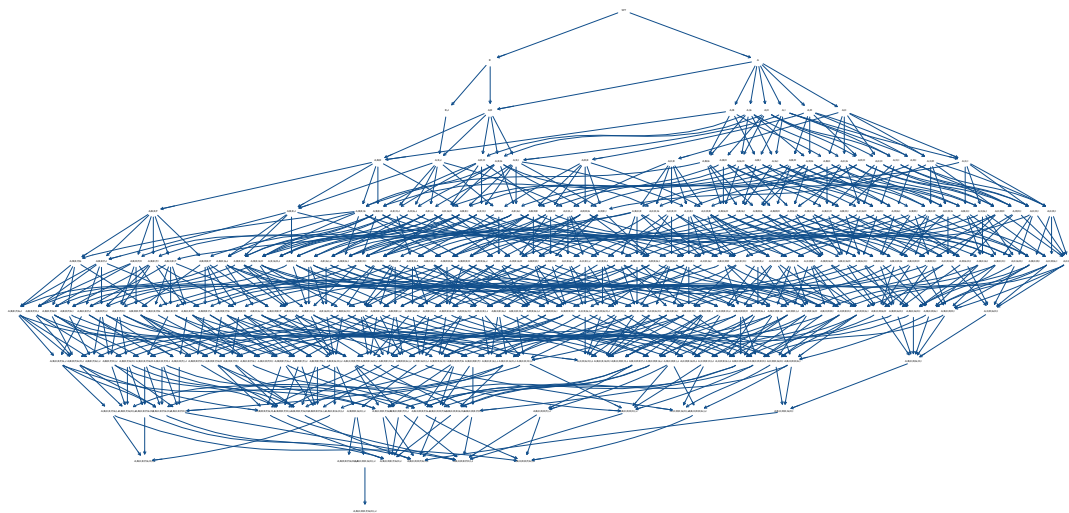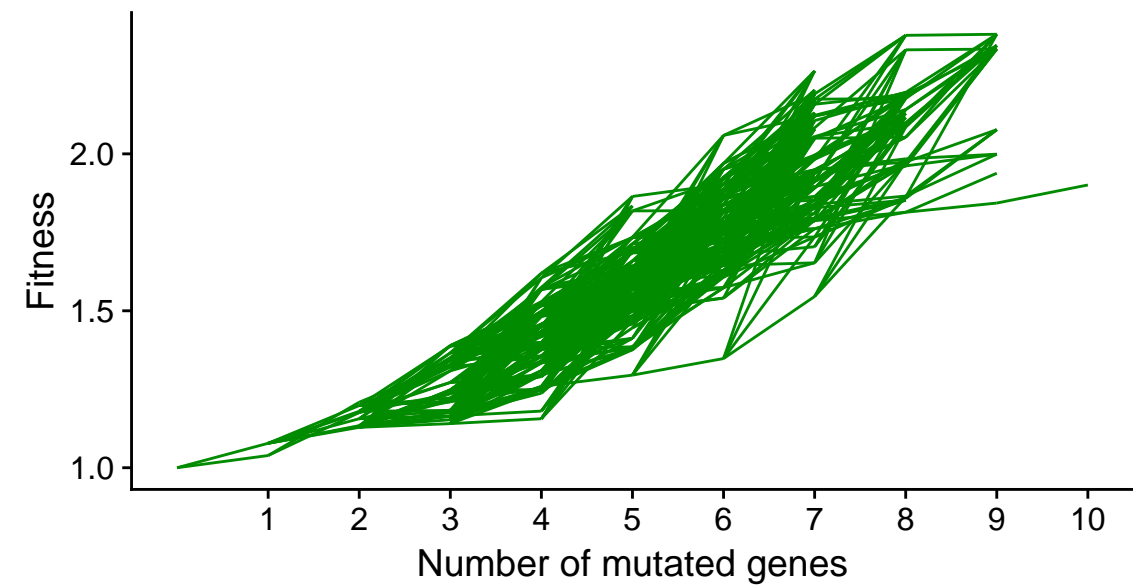



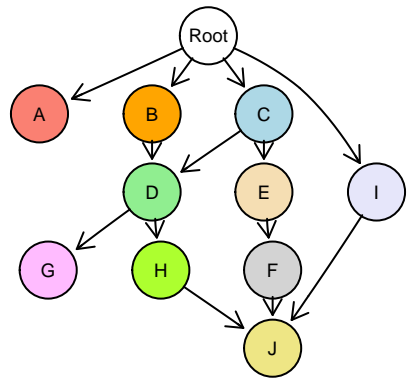

ID [iyeU83TTZklien106](#)  
 acc genotypes 84  
 peaks no back 9  
 removed edges 37  
 prop rem edges 0.168

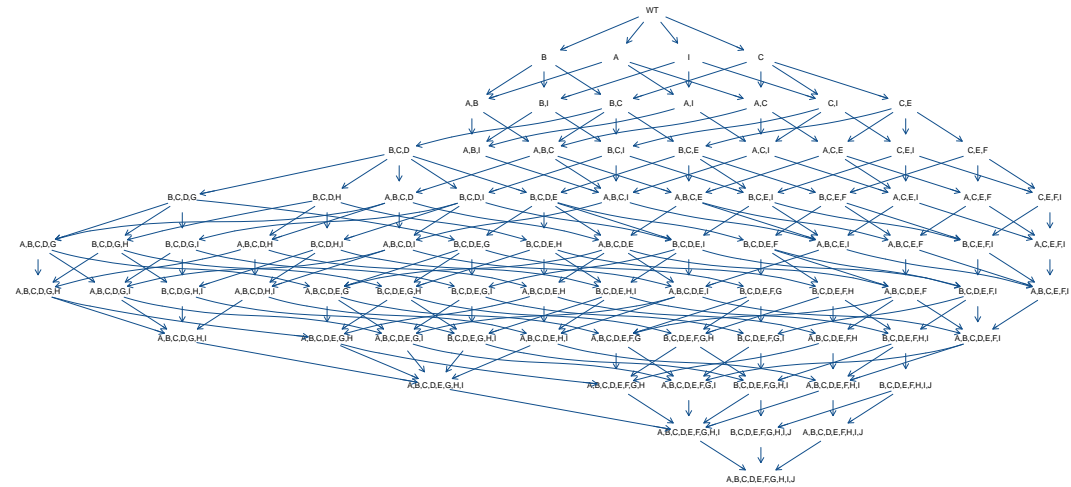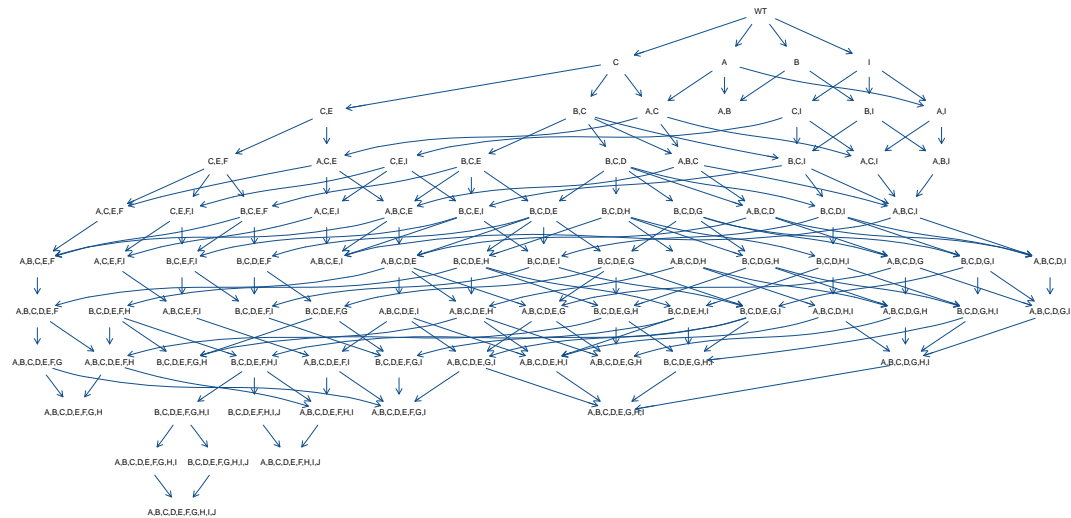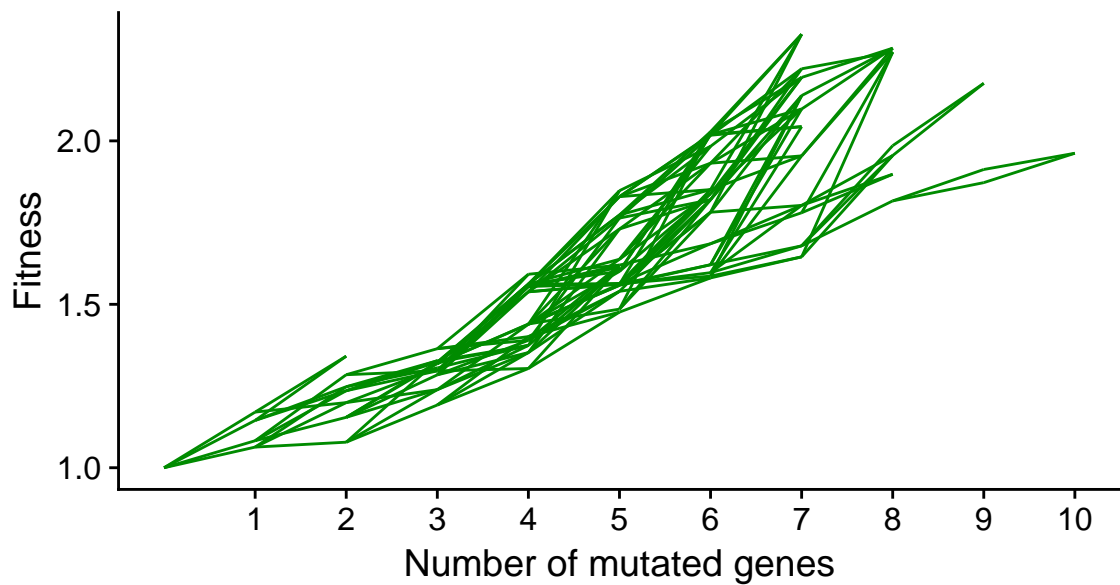

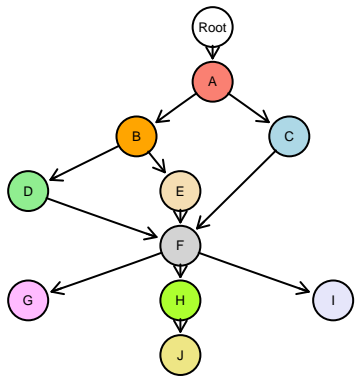

ID iyF6c65slZnguySA  
 acc genotypes 23  
 peaks no back 2  
 removed edges 2  
 prop rem edges 0.054

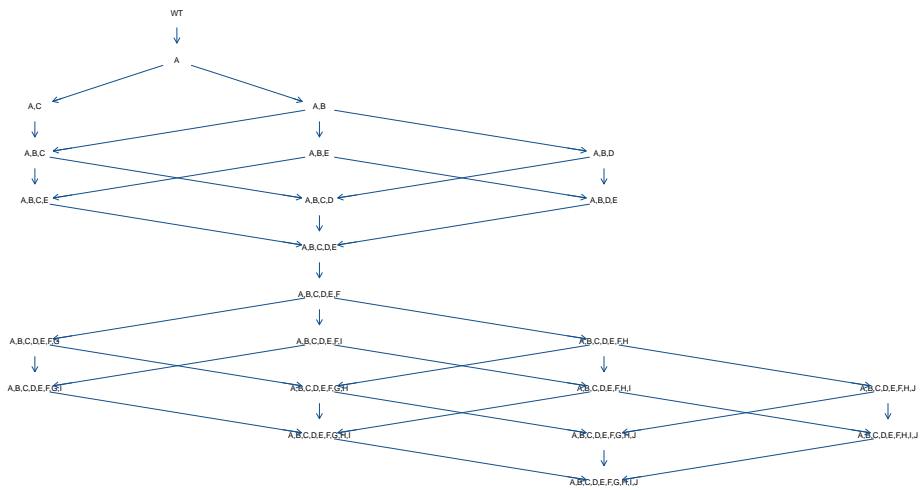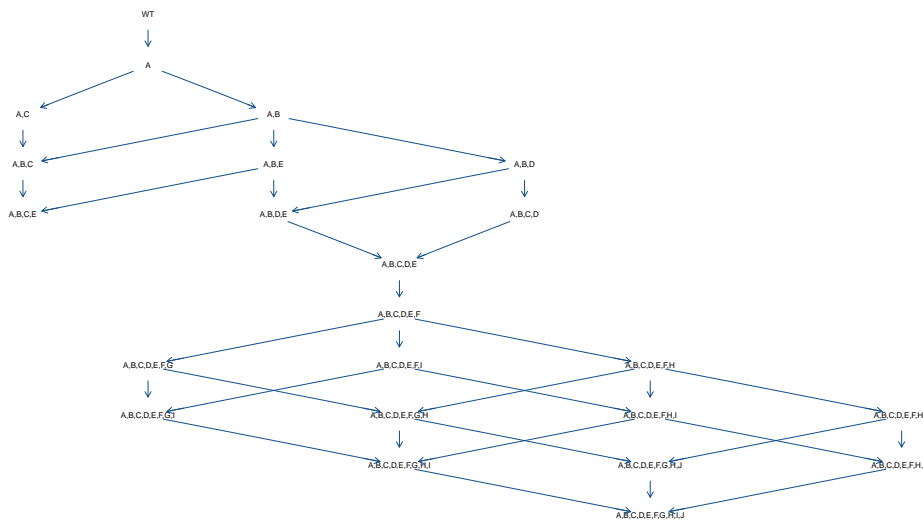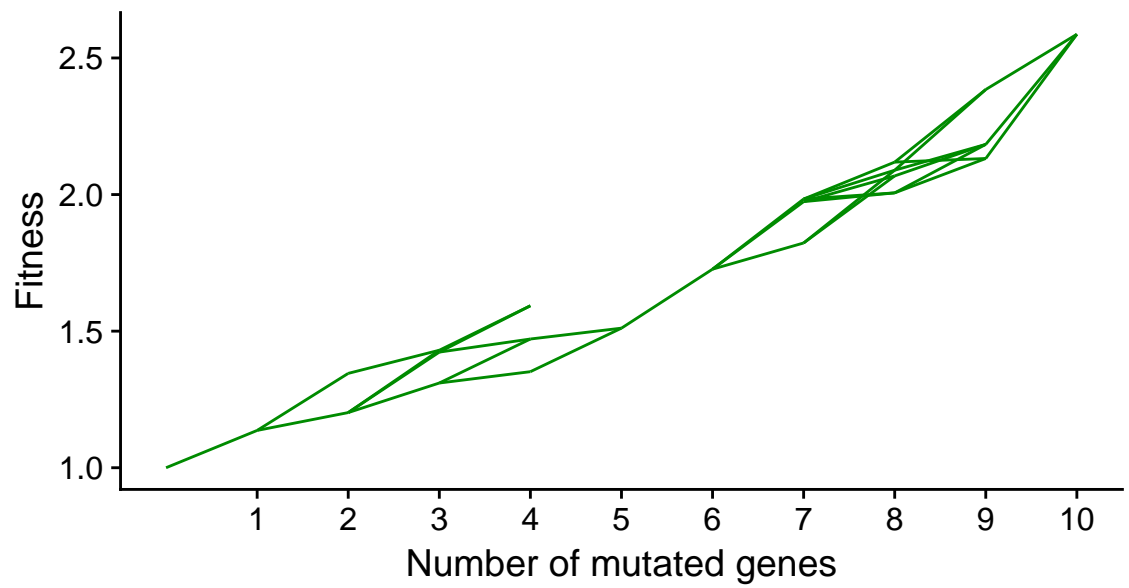

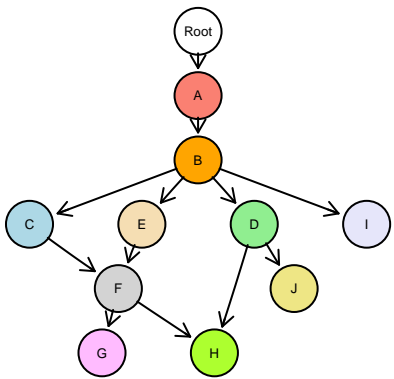

*ID* iYOTCycsSTgt6LB1  
*acc genotypes* 46  
*peaks no back* 4  
*removed edges* 12  
*prop rem edges* 0.12

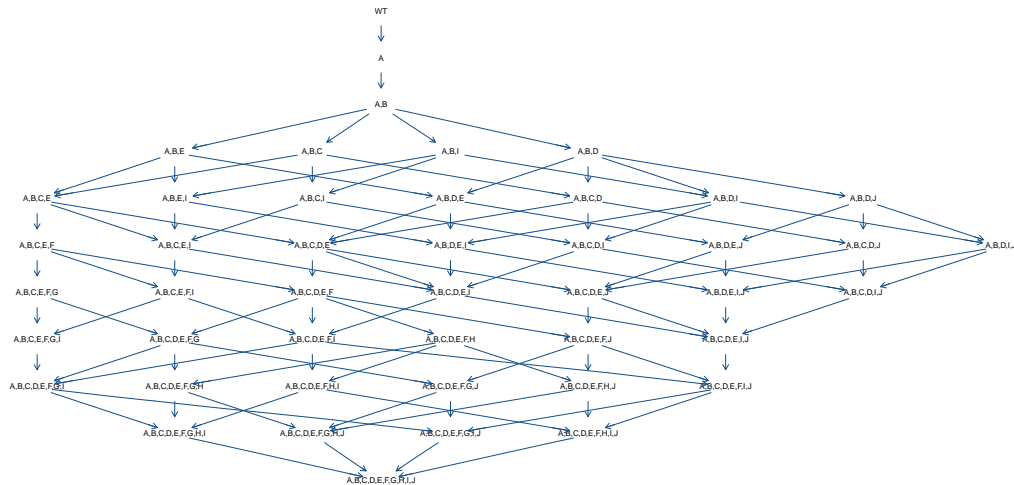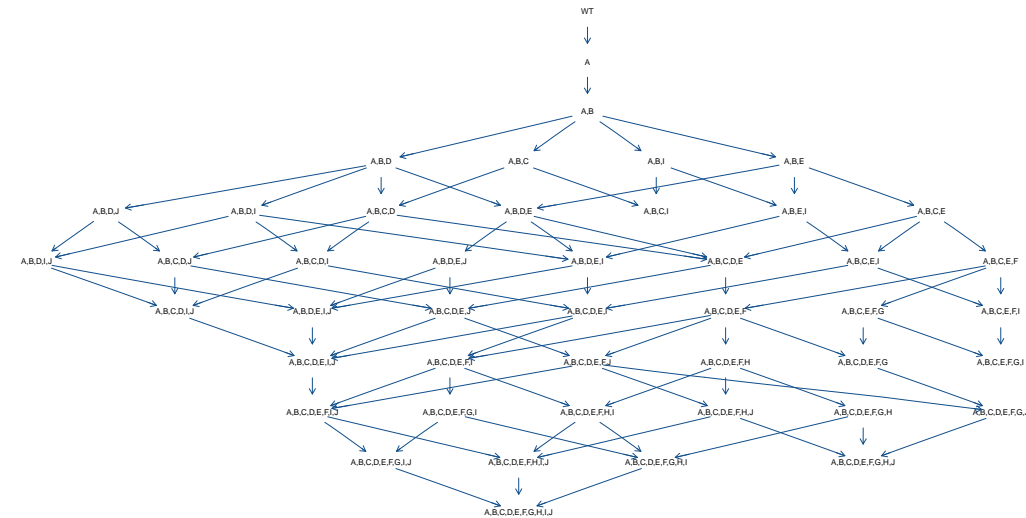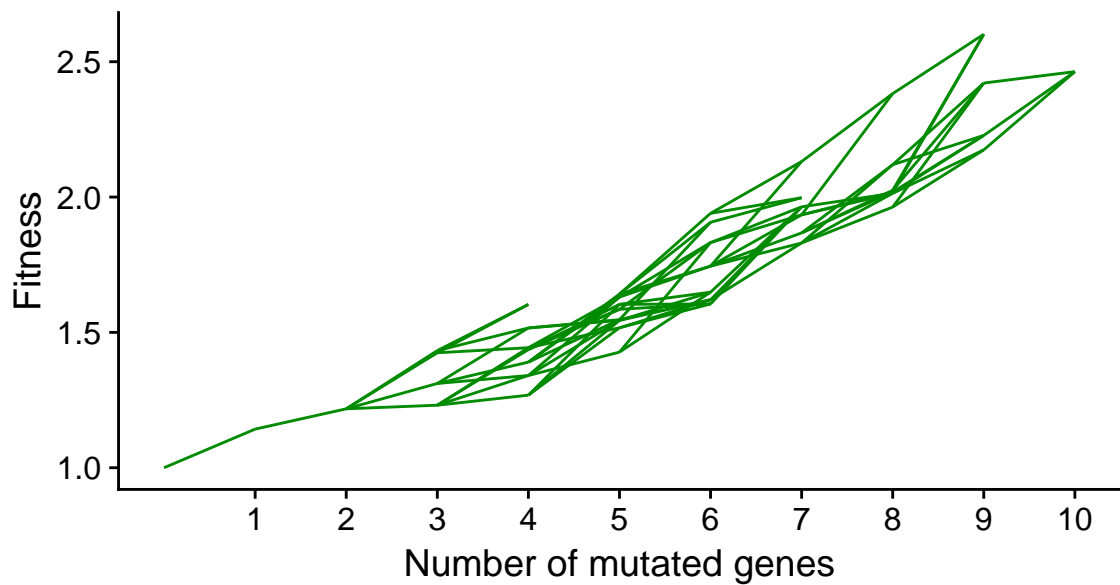

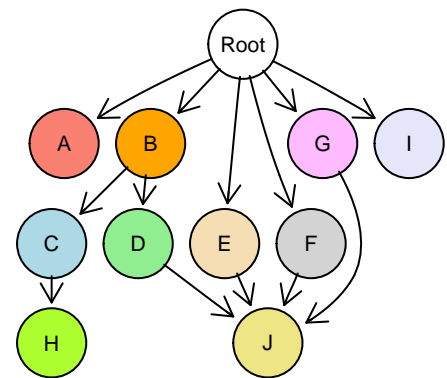

*ID* ja5K99Pb6N9URztp  
*acc genotypes* 236  
*peaks no back* 17  
*removed edges* 192  
*prop rem edges* 0.226

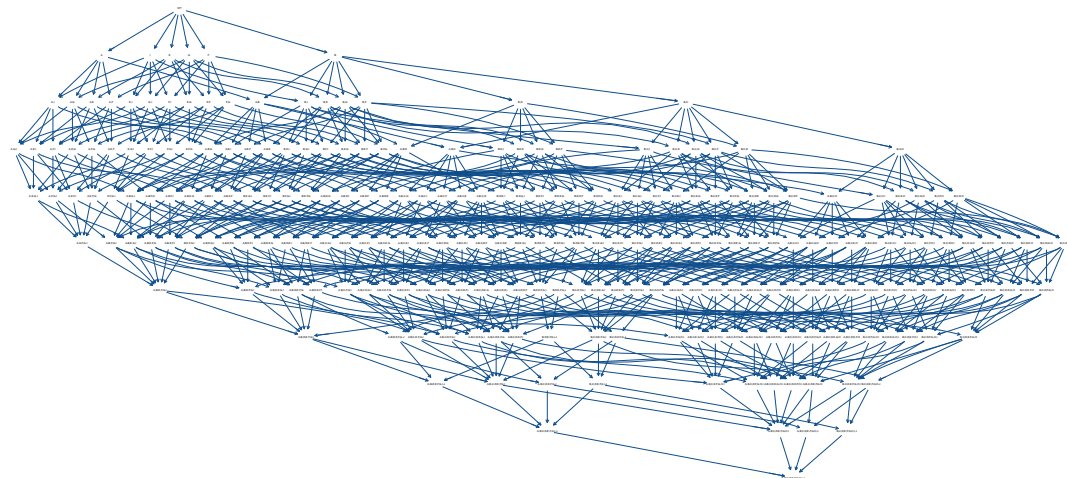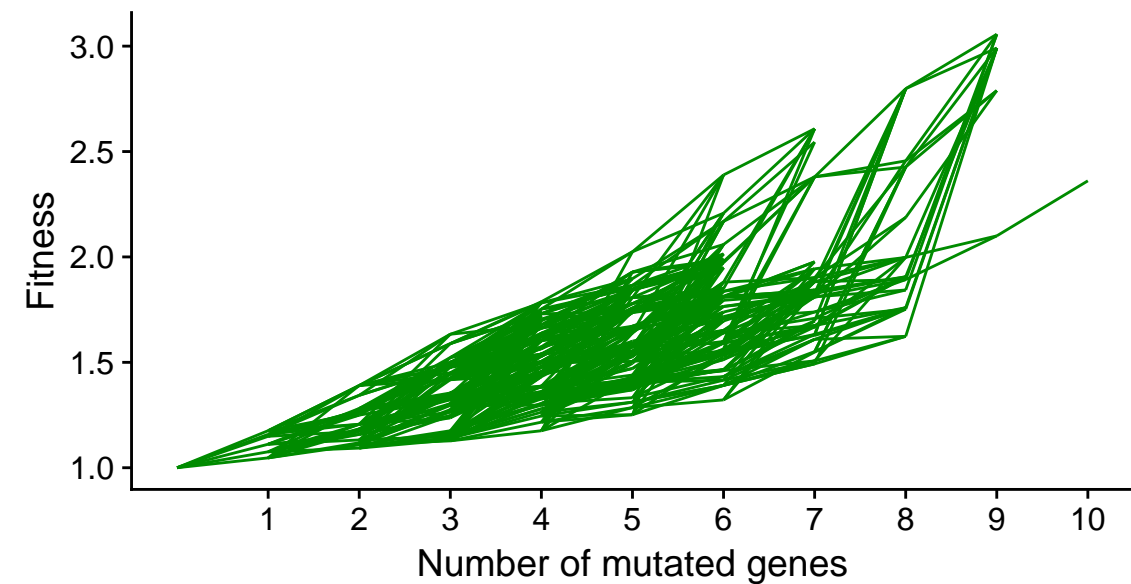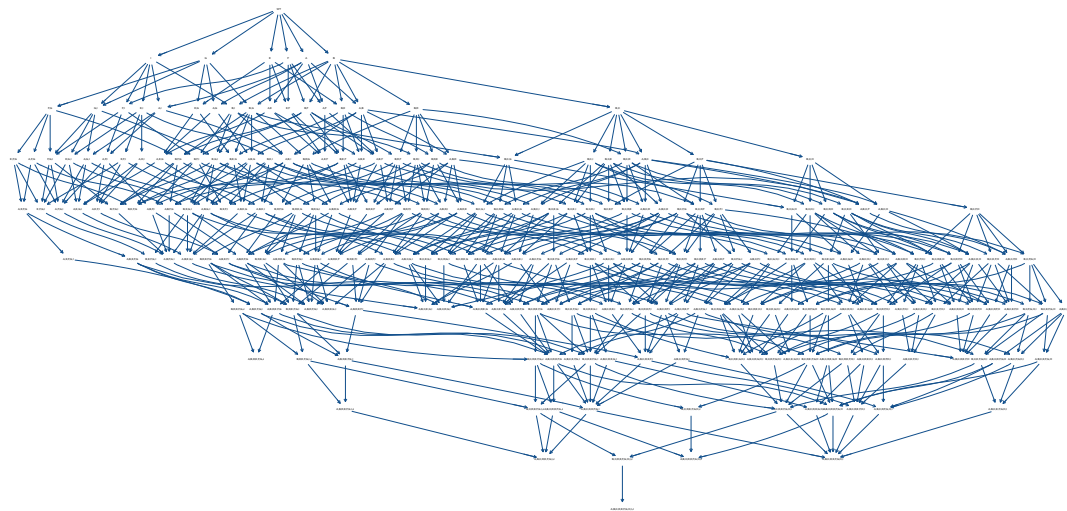

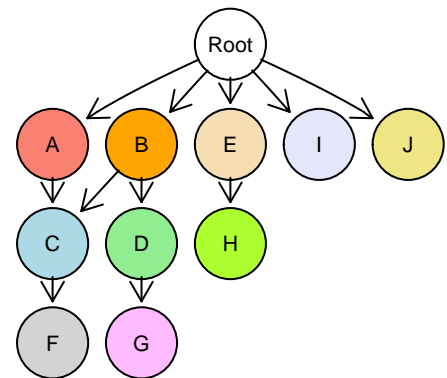

ID **jBiKG5Scuo10UusyUf**  
 acc genotypes **168**  
 peaks no back **14**  
 removed edges **111**  
 prop rem edges **0.213**

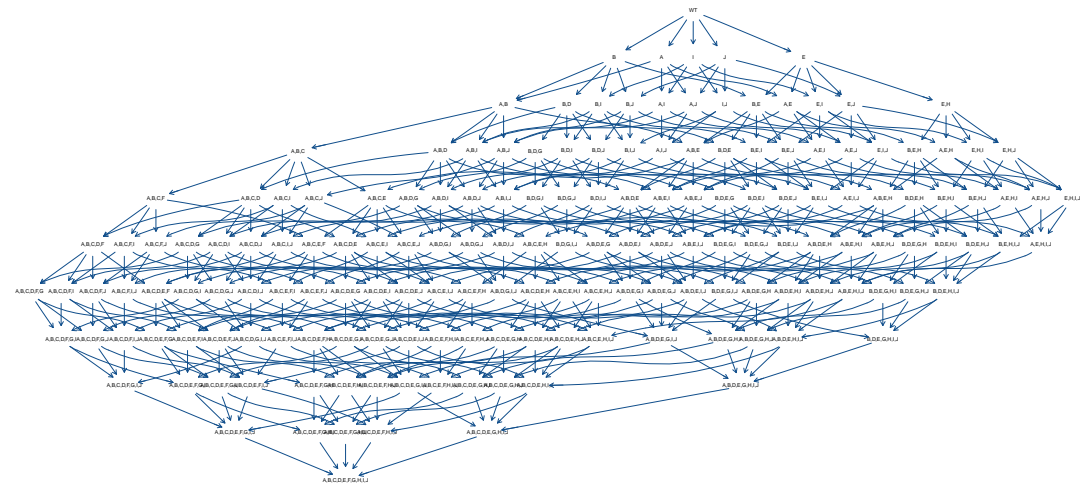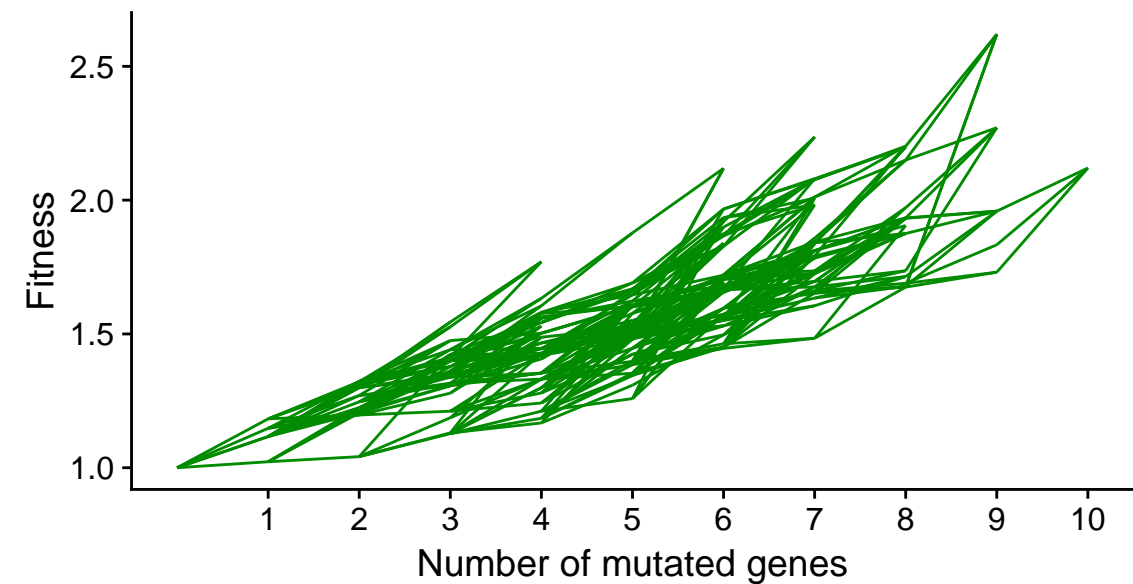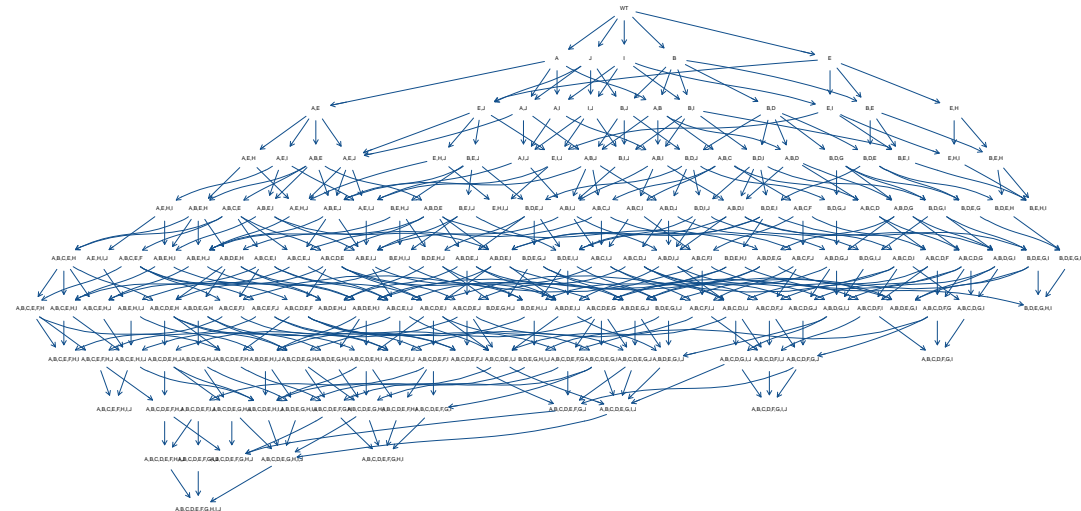

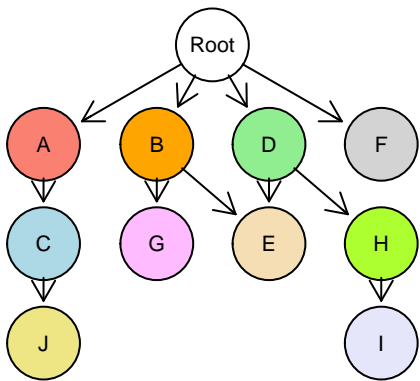

*ID* jelgNCENfpAlgFTL  
*acc genotypes* 144  
*peaks no back* 15  
*removed edges* 89  
*prop rem edges* 0.212

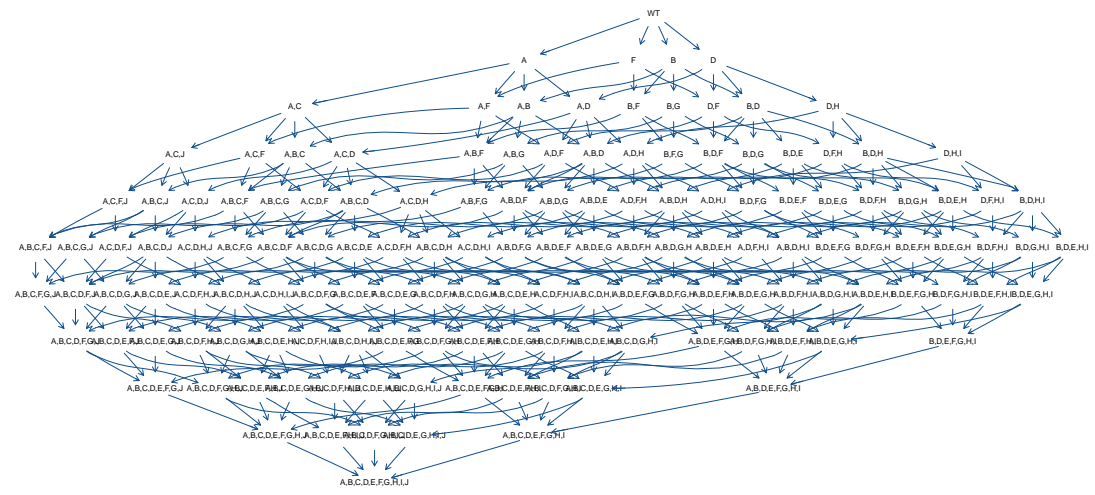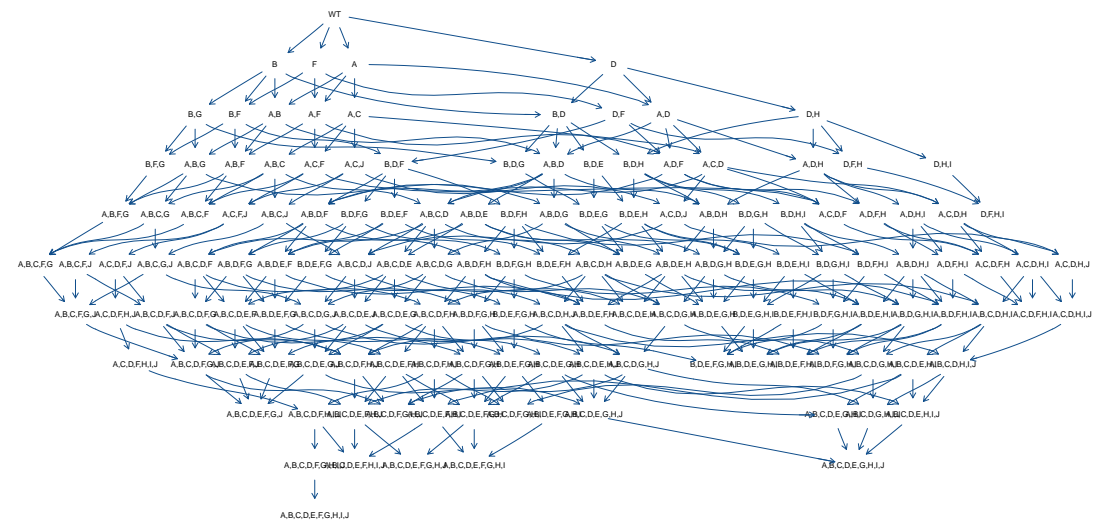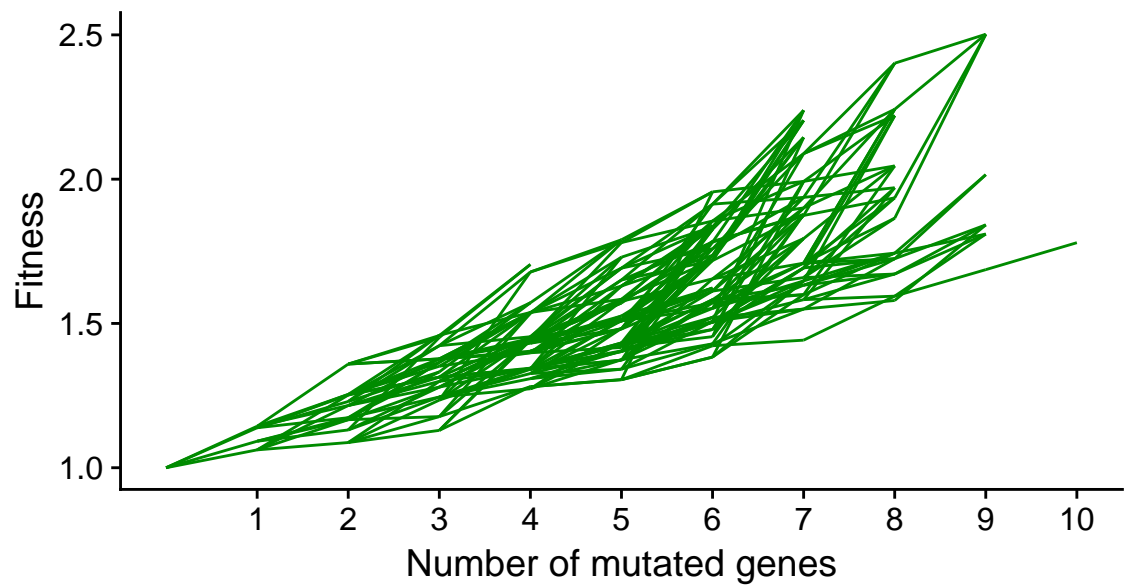

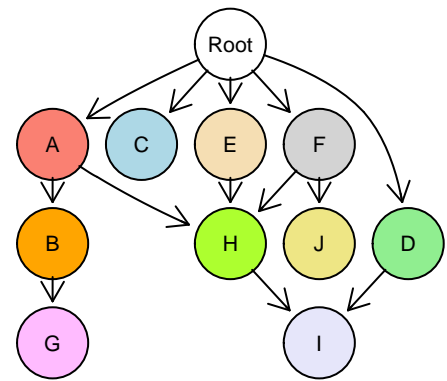

ID [k9iq8ysBwZDbv105Y](#)  
 acc genotypes 132  
 peaks no back 12  
 removed edges 78  
 prop rem edges 0.201

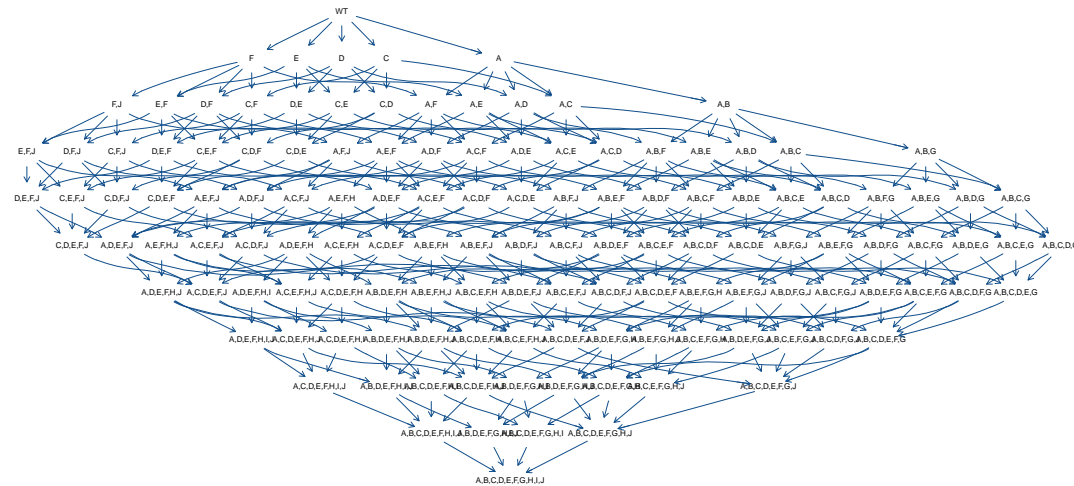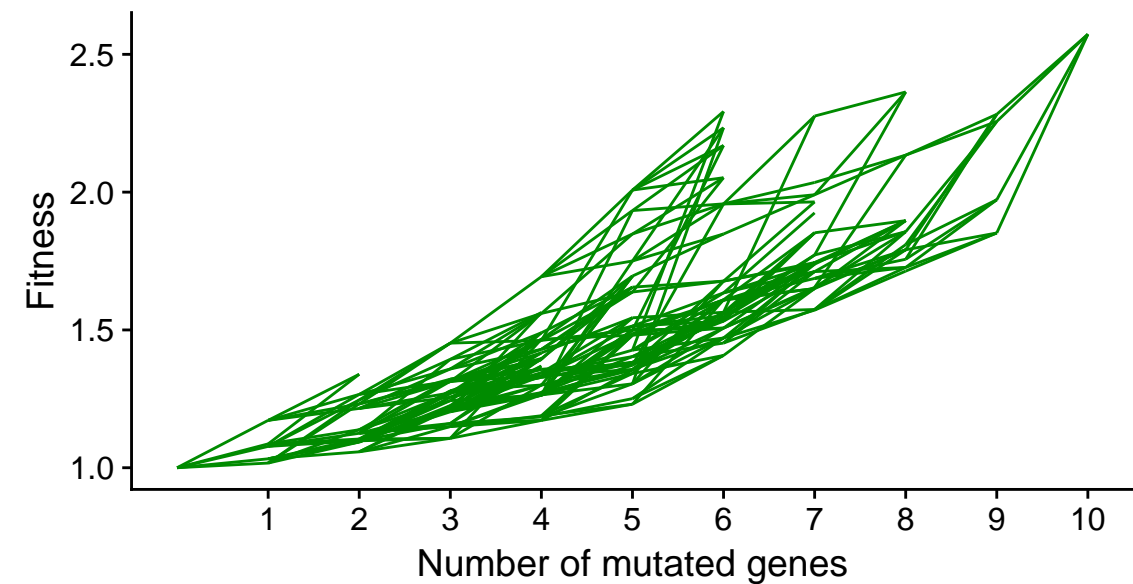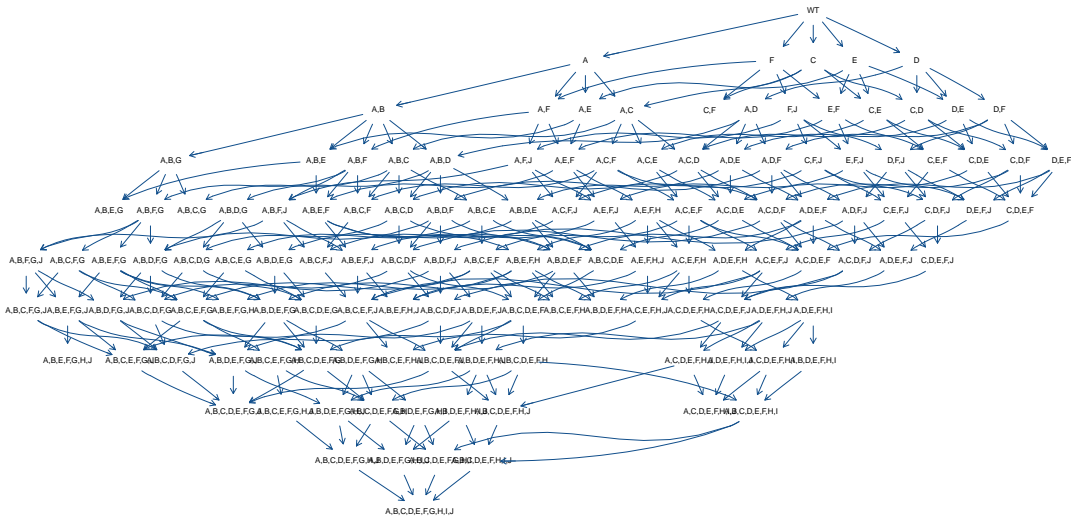

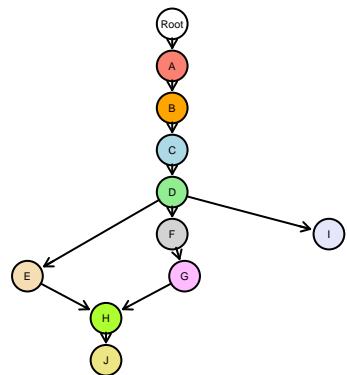

ID **KbbfhCf9UoSKy10IE**  
 acc genotypes **20**  
 peaks no back **2**  
 removed edges **1**  
 prop rem edges **0.033**

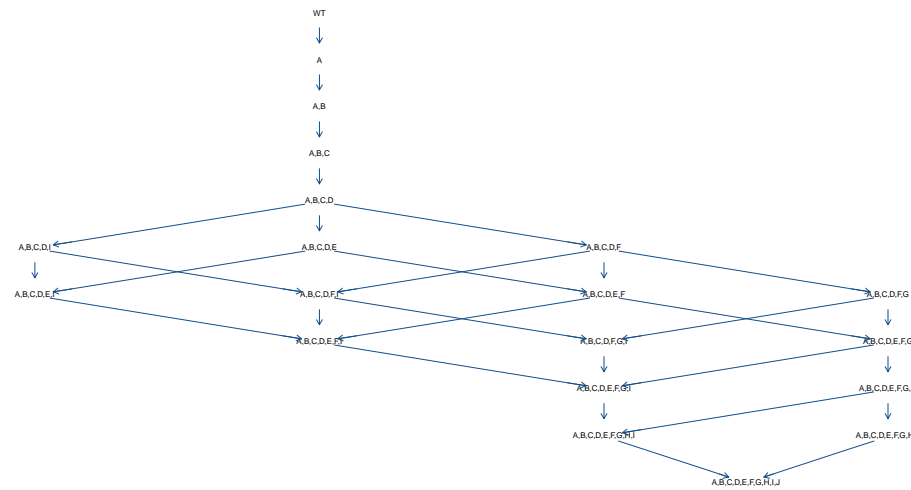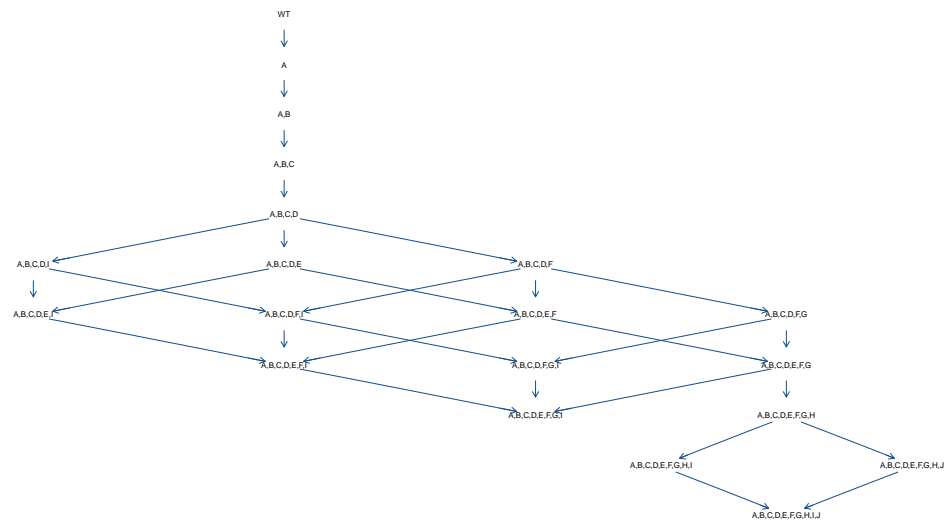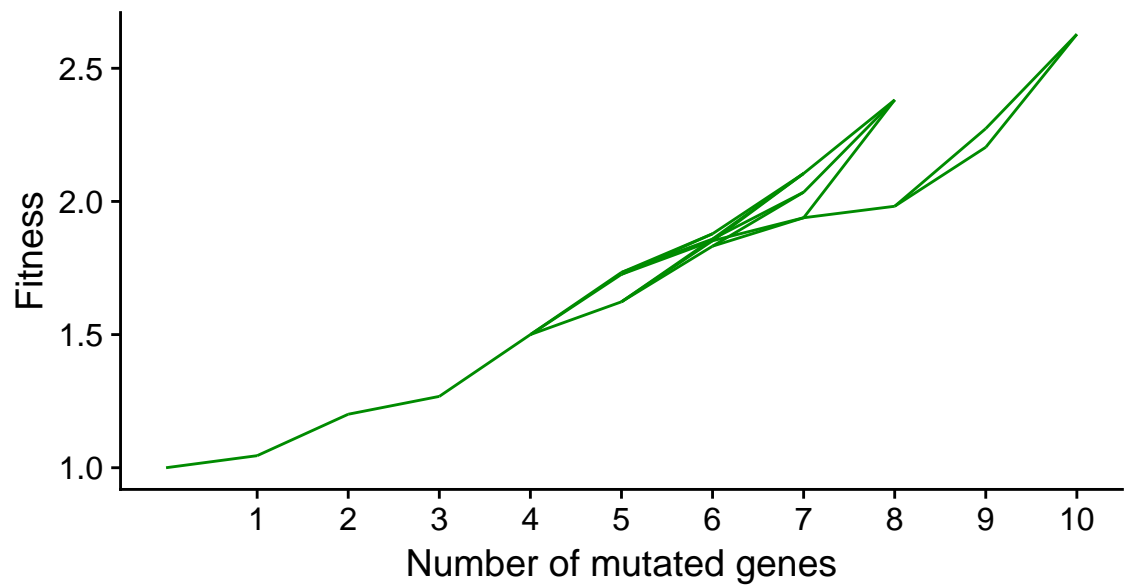



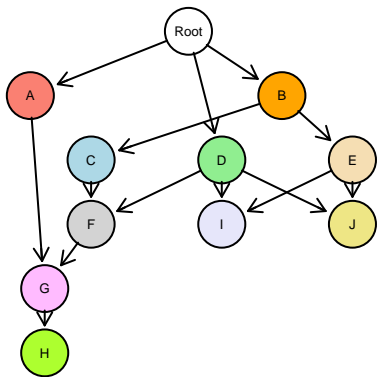

ID **KEEVYiND4AYuzrNr**  
 acc genotypes **52**  
 peaks no back **7**  
 removed edges **19**  
 prop rem edges **0.168**

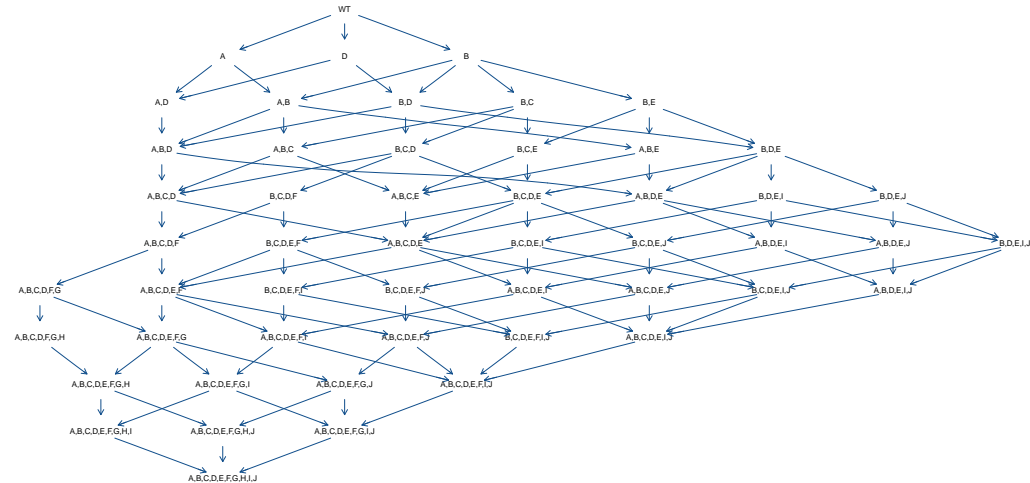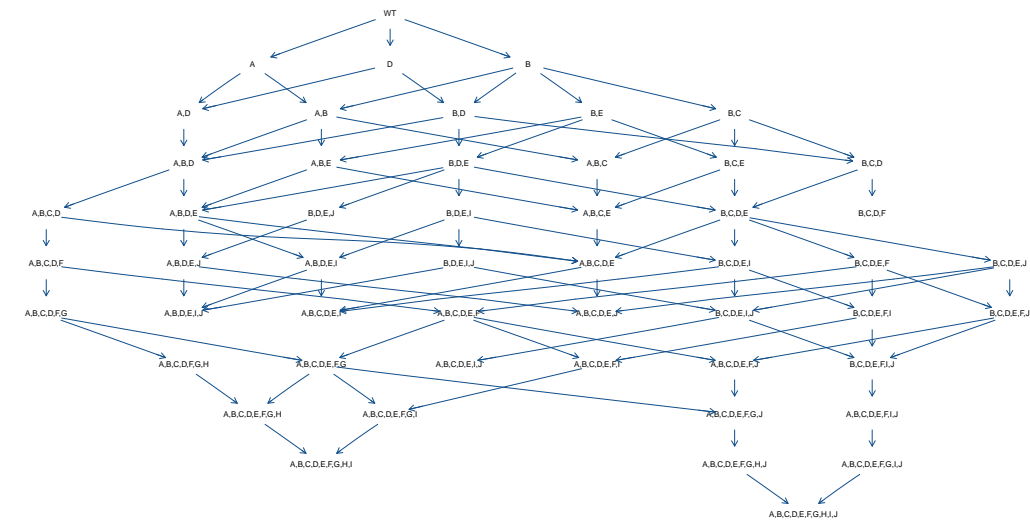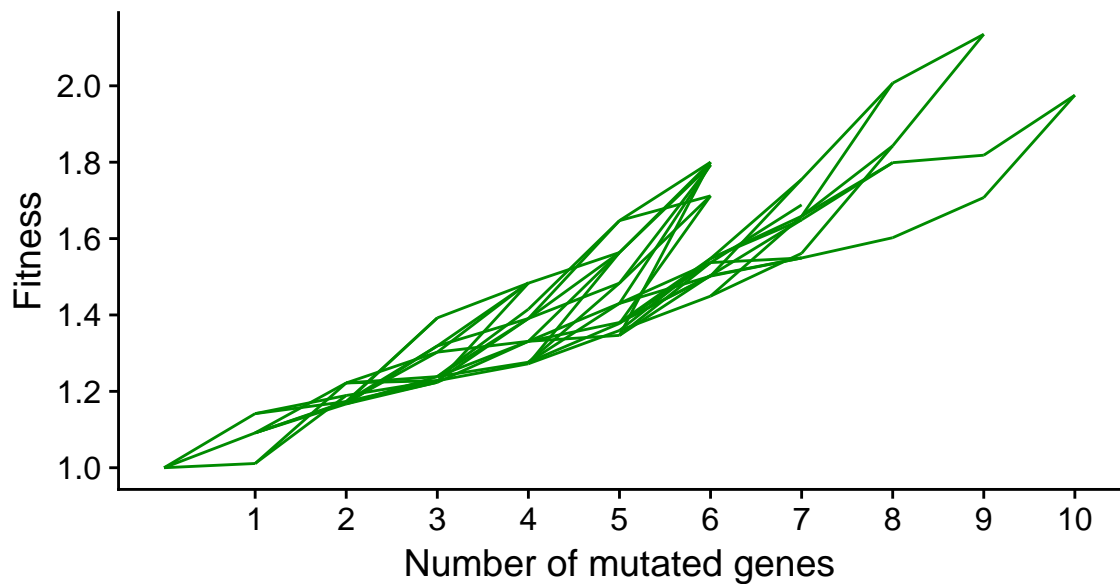

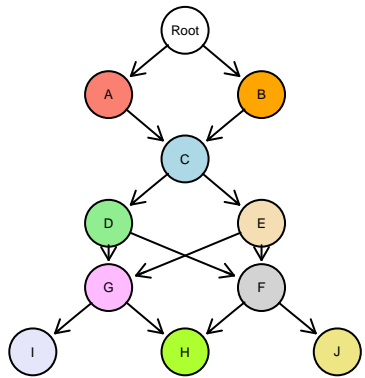

ID **KpASsdOSpsoQXAqF**  
 acc genotypes **20**  
 peaks no back **5**  
 removed edges **5**  
 prop rem edges **0.172**

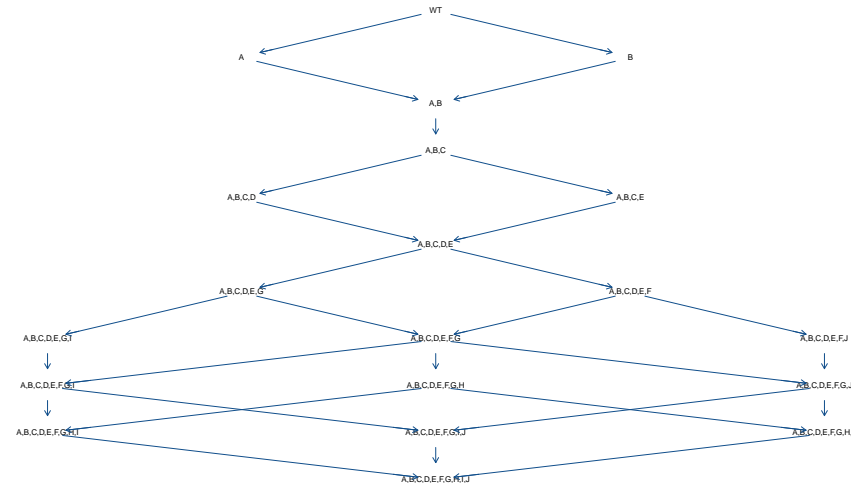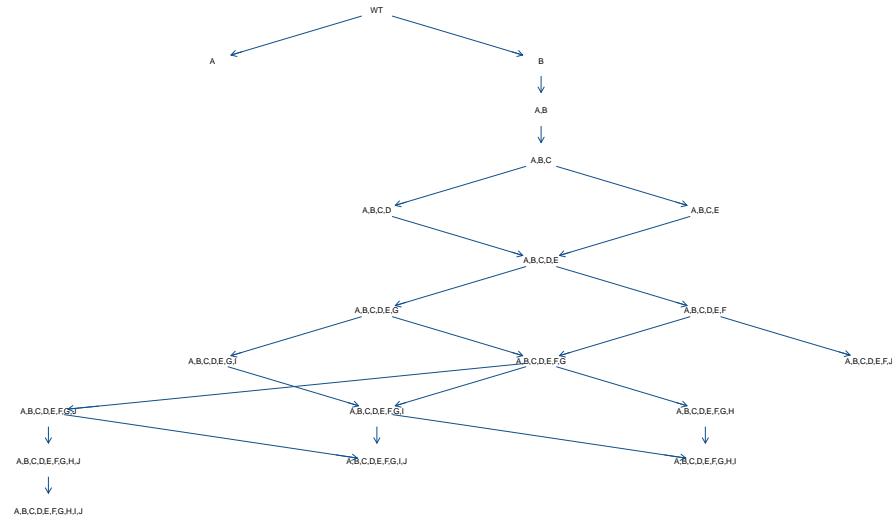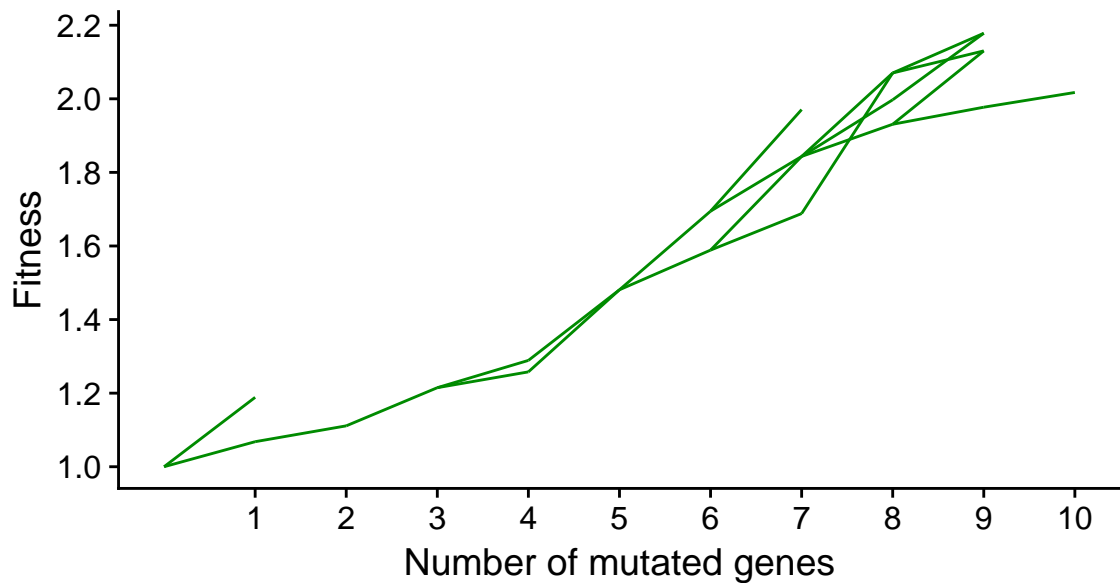

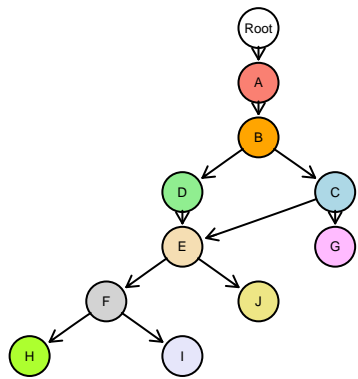

ID **KTPDesITE10I68VaZ**  
 acc genotypes **28**  
 peaks no back **5**  
 removed edges **6**  
 prop rem edges **0.118**

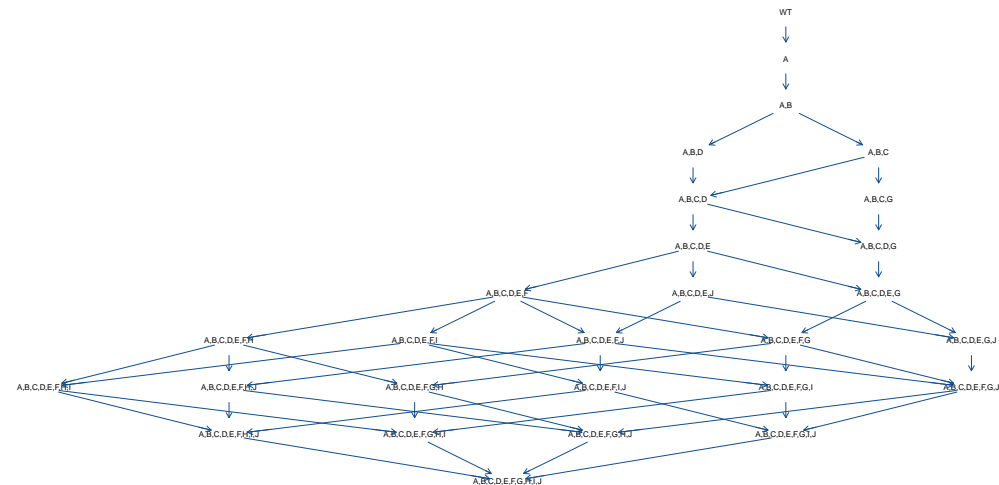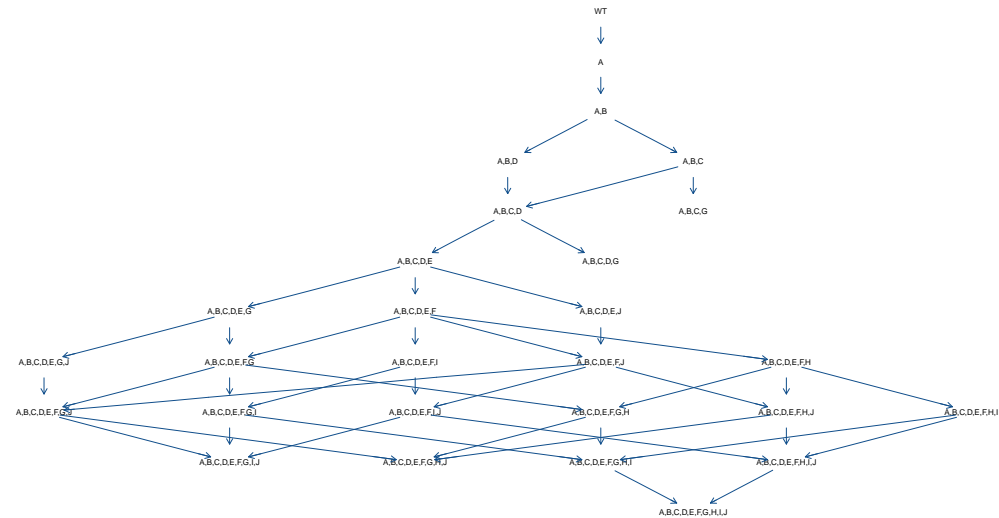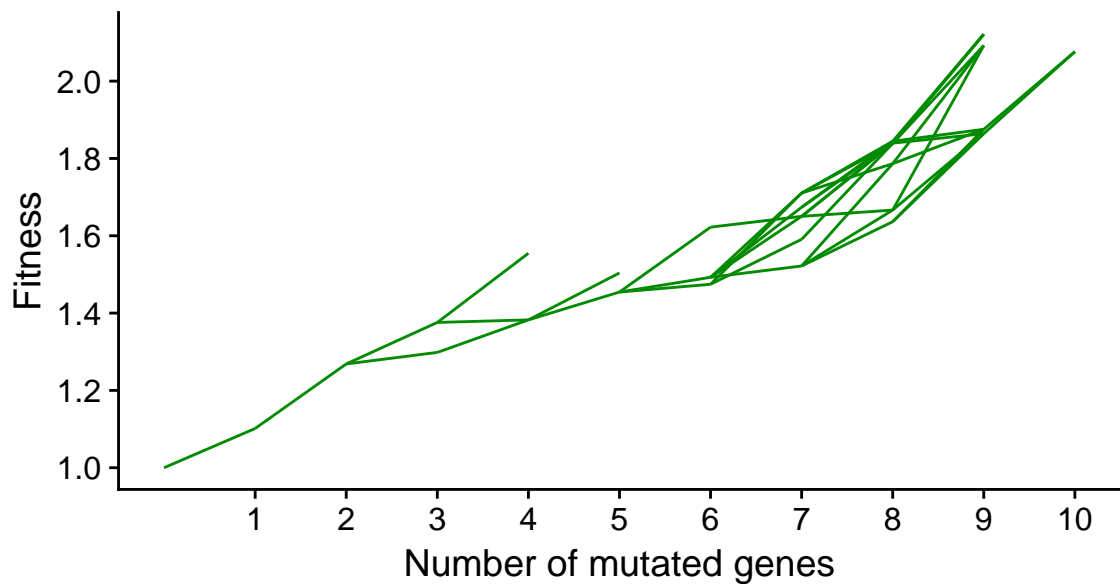

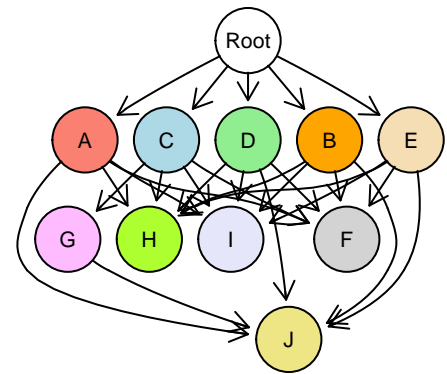

ID **ku30JGvU29I3Hlrg**  
 acc genotypes **70**  
 peaks no back **9**  
 removed edges **32**  
 prop rem edges **0.179**

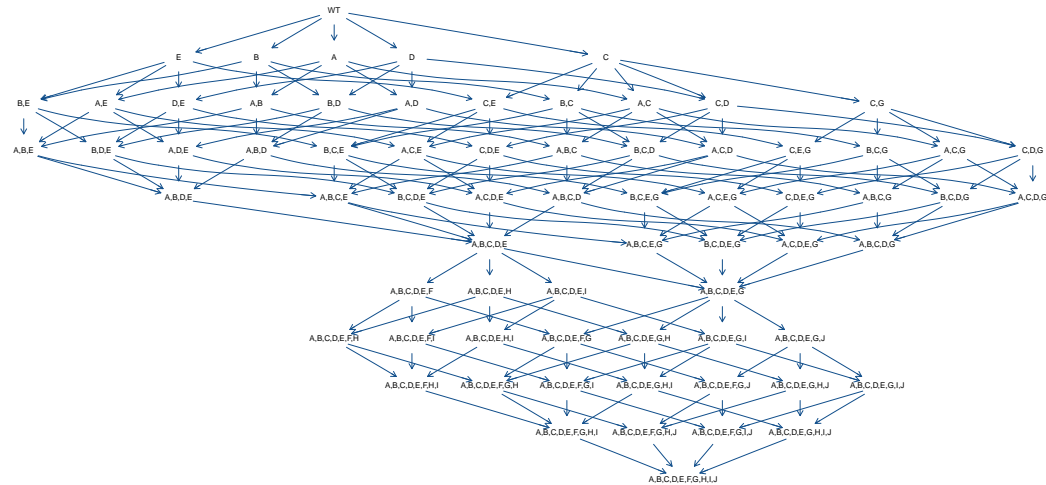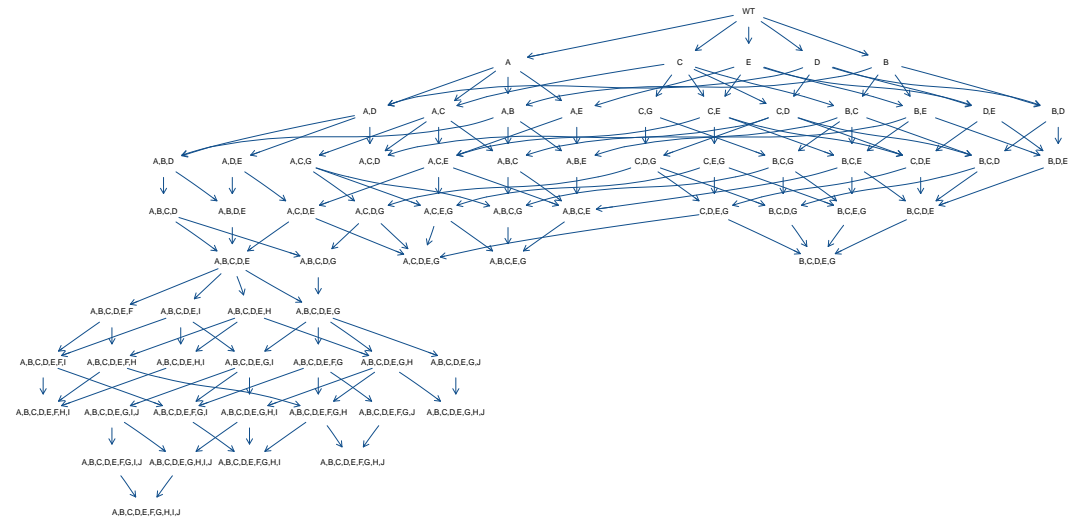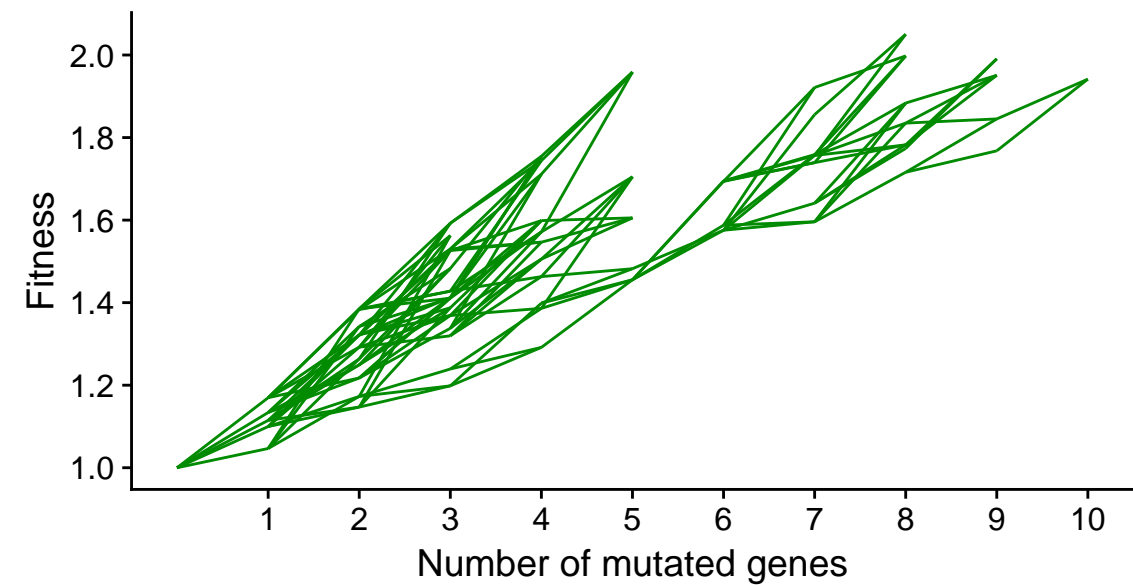

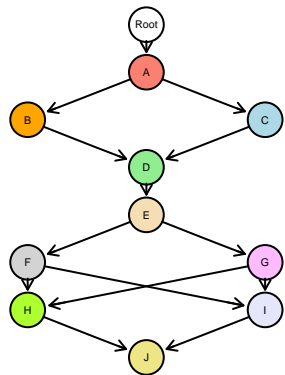

ID **kuiBBxD31RFF9NEj**  
 acc genotypes **14**  
 peaks no back **2**  
 removed edges **1**  
 prop rem edges **0.062**

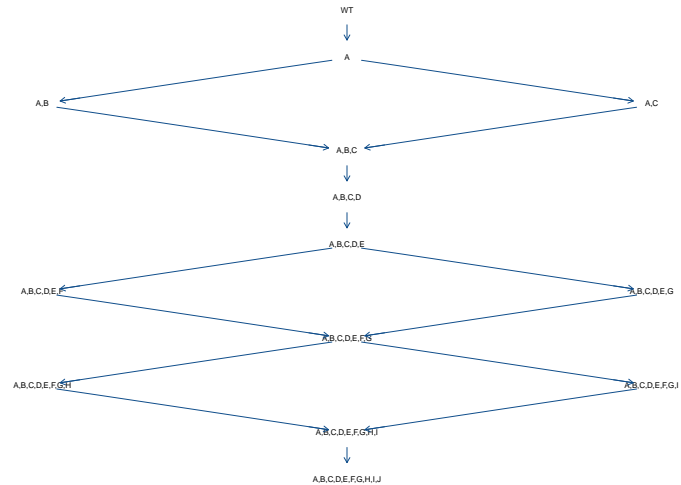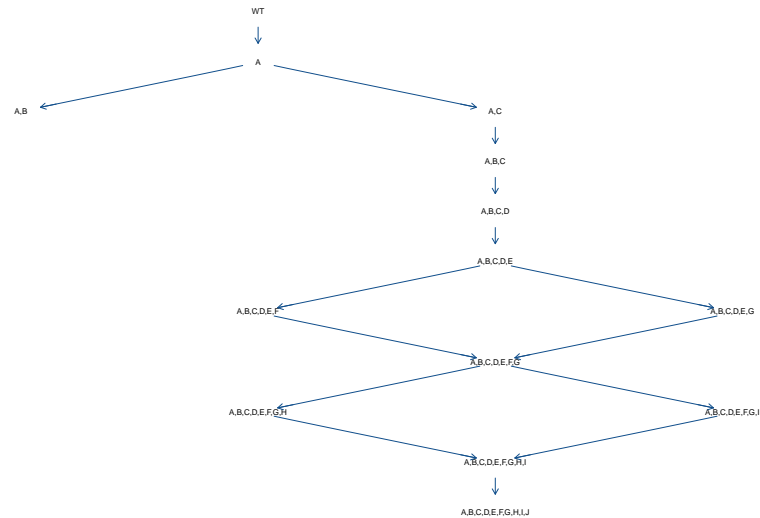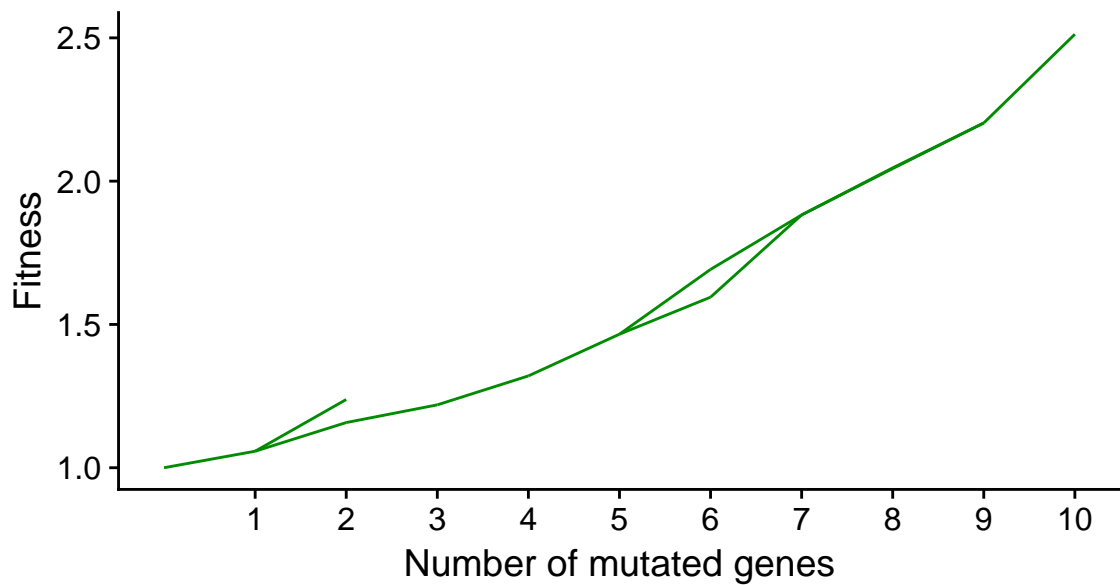

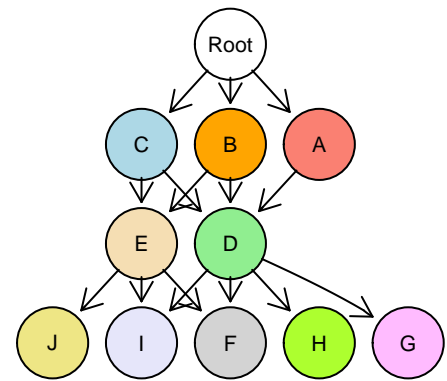

*ID* kvFyL8XIKXwZvz1L  
*acc genotypes* 48  
*peaks no back* 9  
*removed edges* 30  
*prop rem edges* 0.275

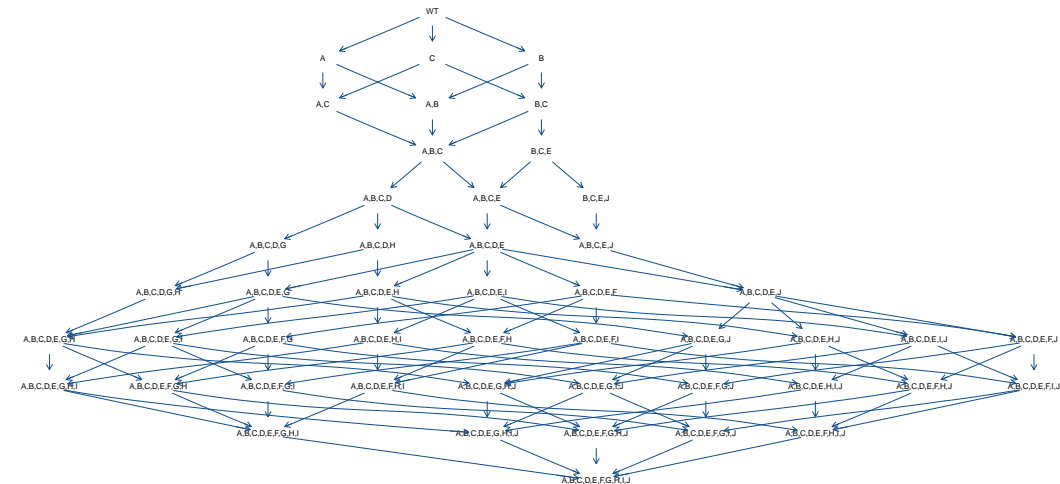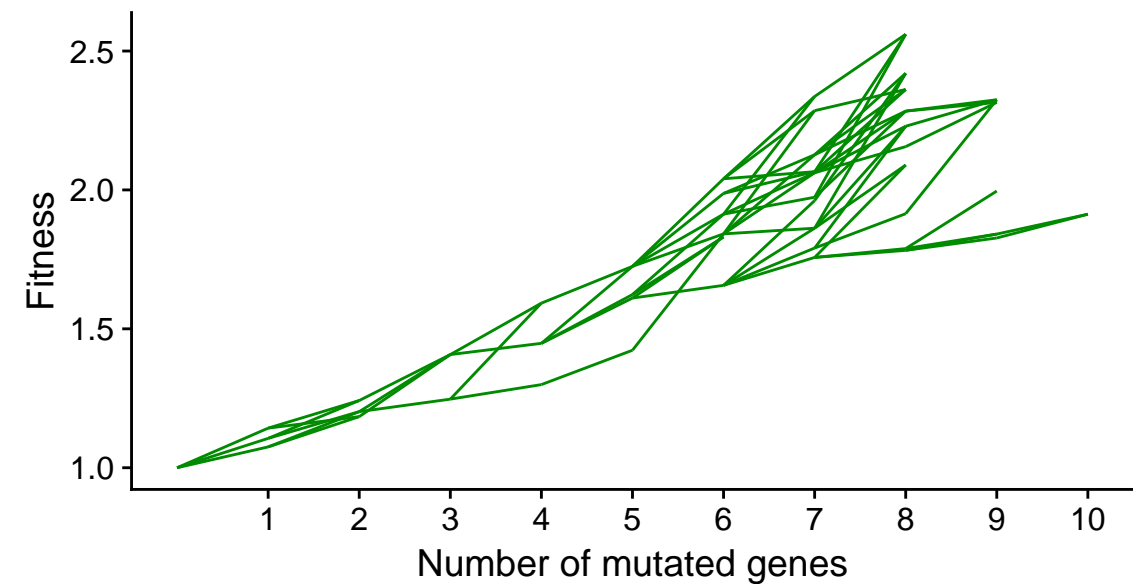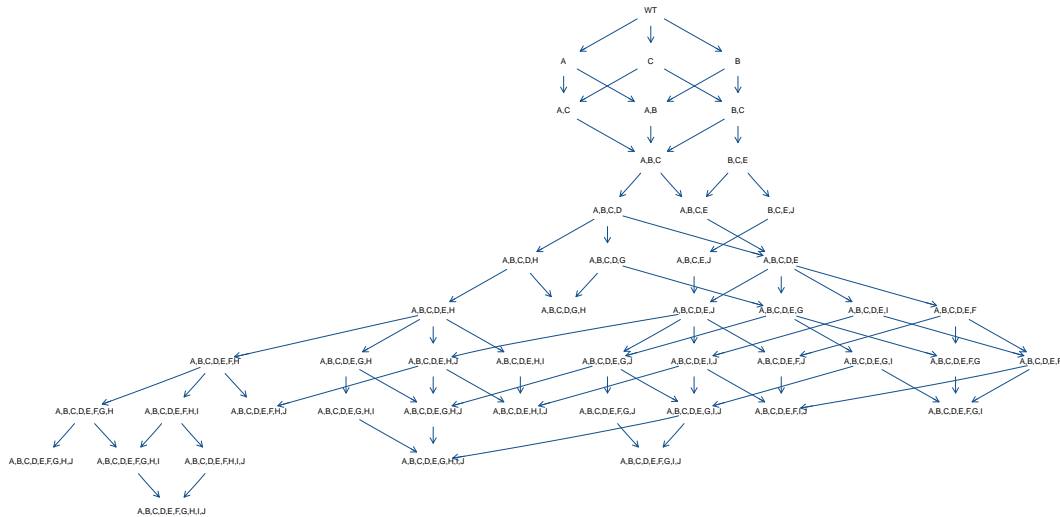

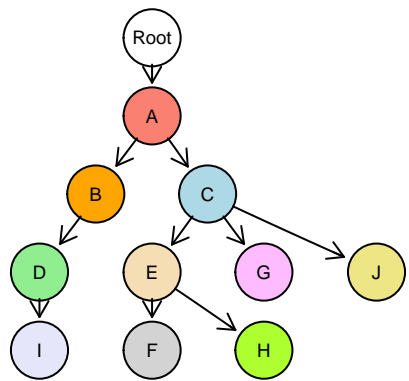

ID **I37sHoyzCWlv8at2**  
 acc genotypes **85**  
 peaks no back **10**  
 removed edges **42**  
 prop rem edges **0.184**

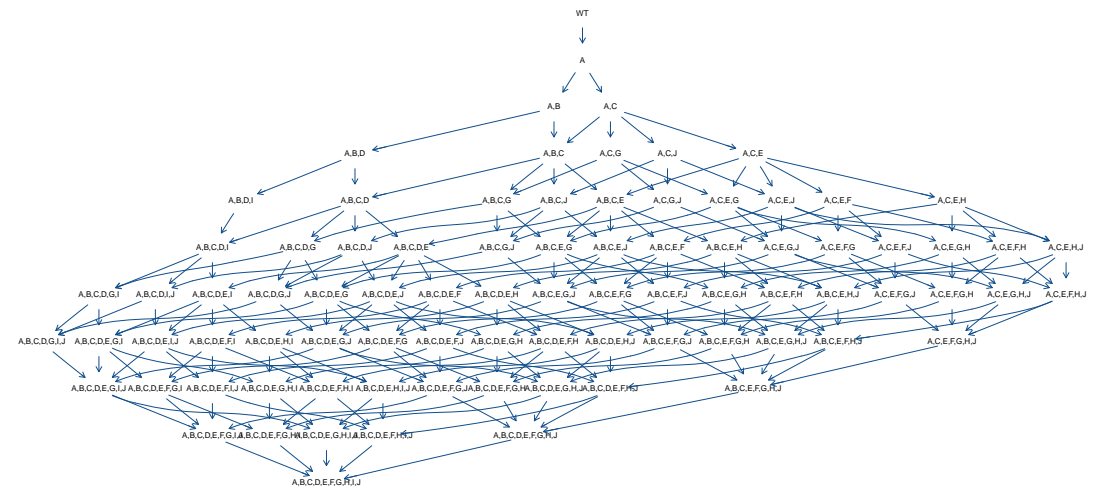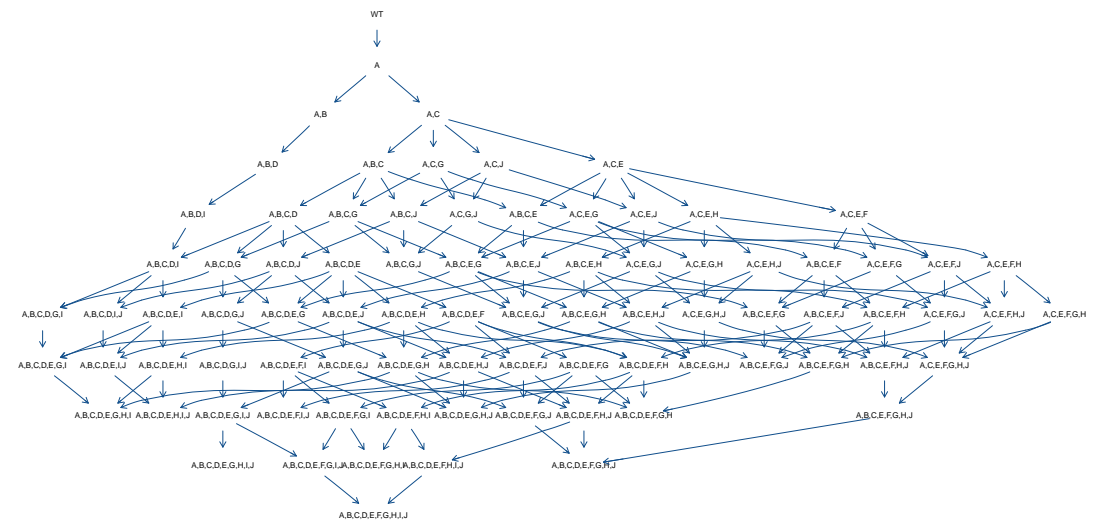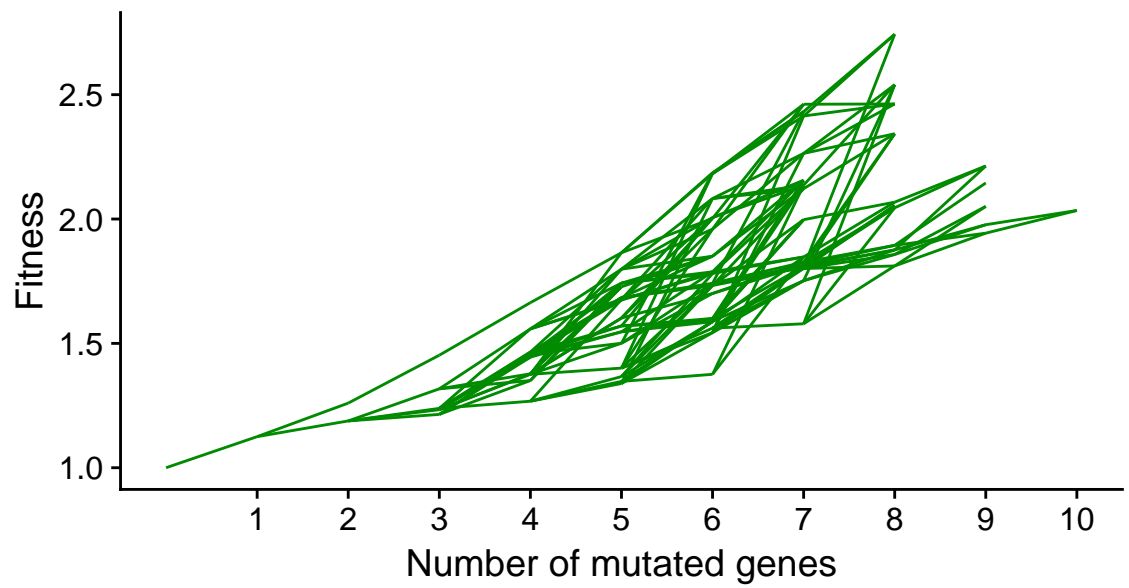

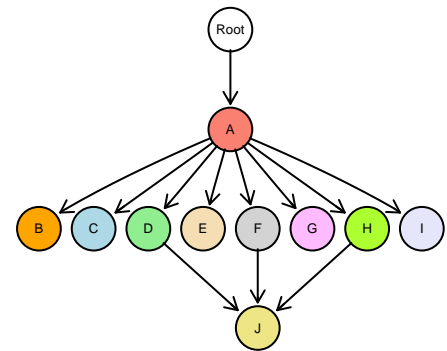

*ID* **lMrqdoPtFXSjeam**  
*acc genotypes* **289**  
*peaks no back* 21  
*removed edges* 252  
*prop rem edges* 0.222

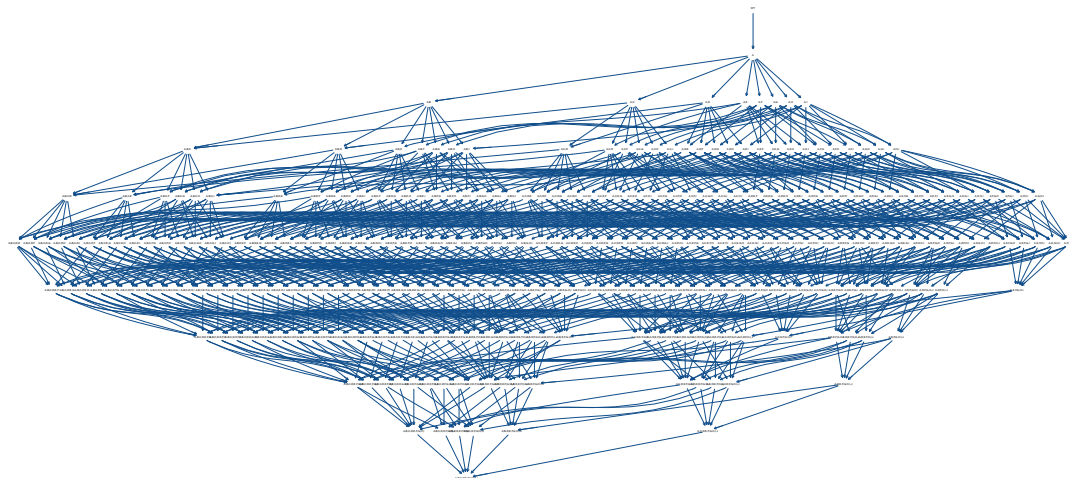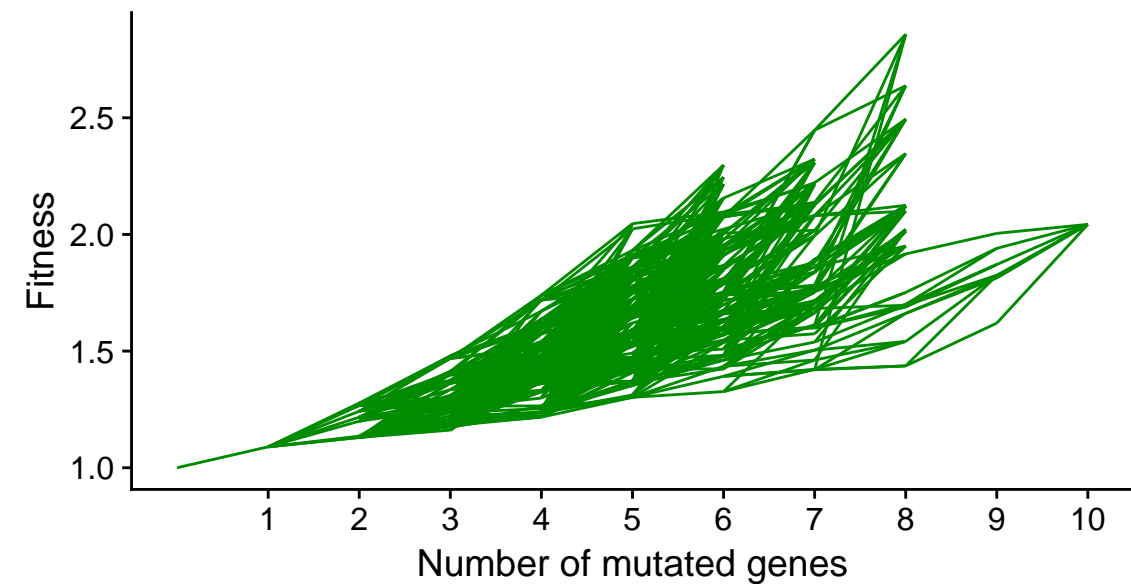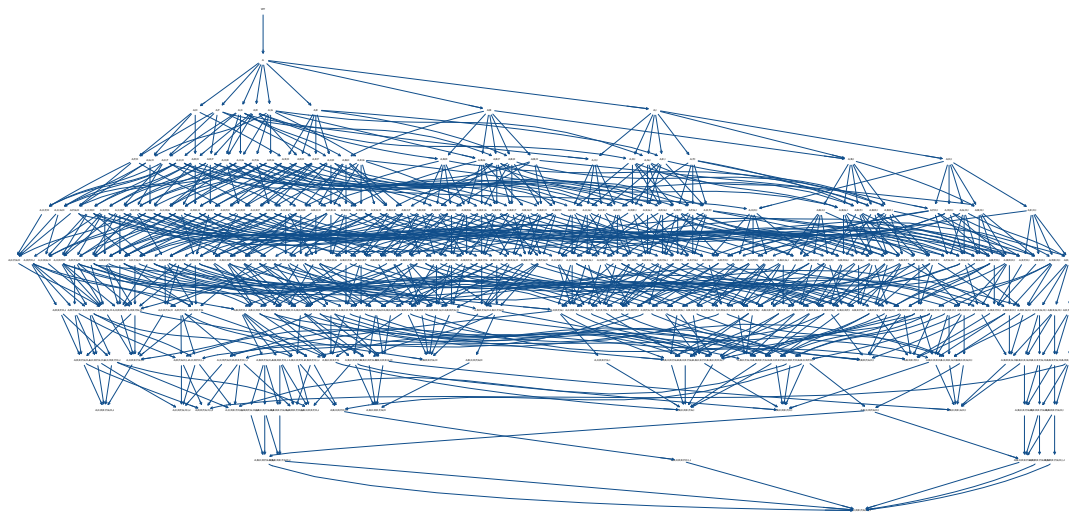



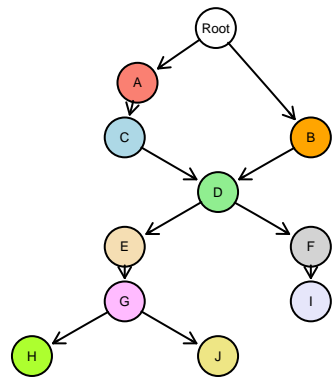

ID LsTIGYZJWFqEXMCQ  
 acc genotypes 24  
 peaks no back 5  
 removed edges 6  
 prop rem edges 0.158

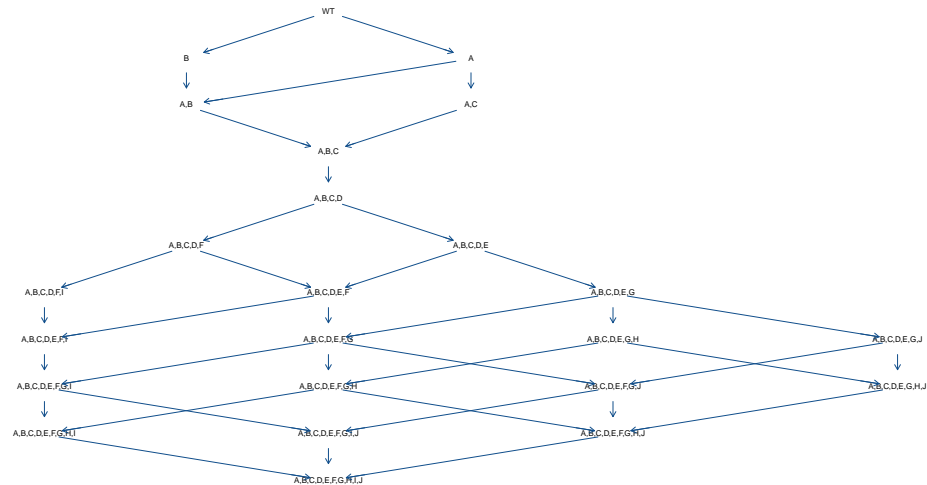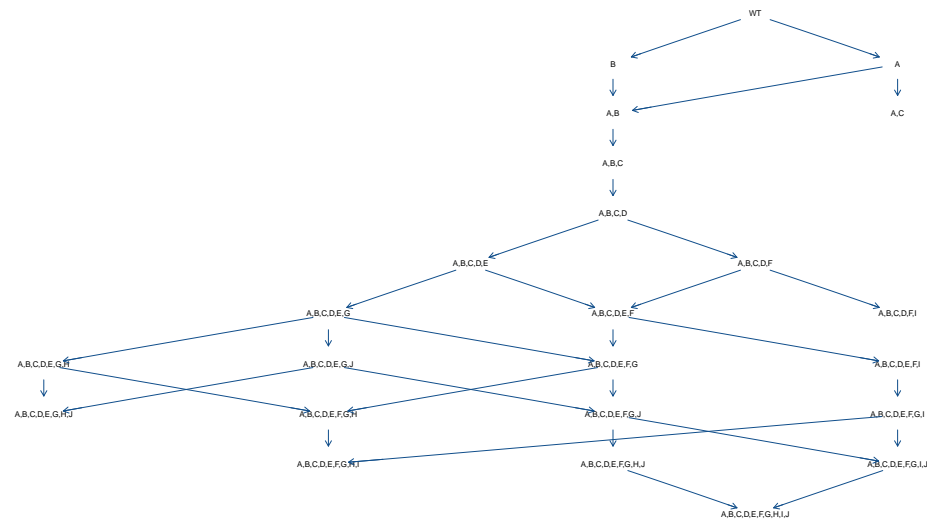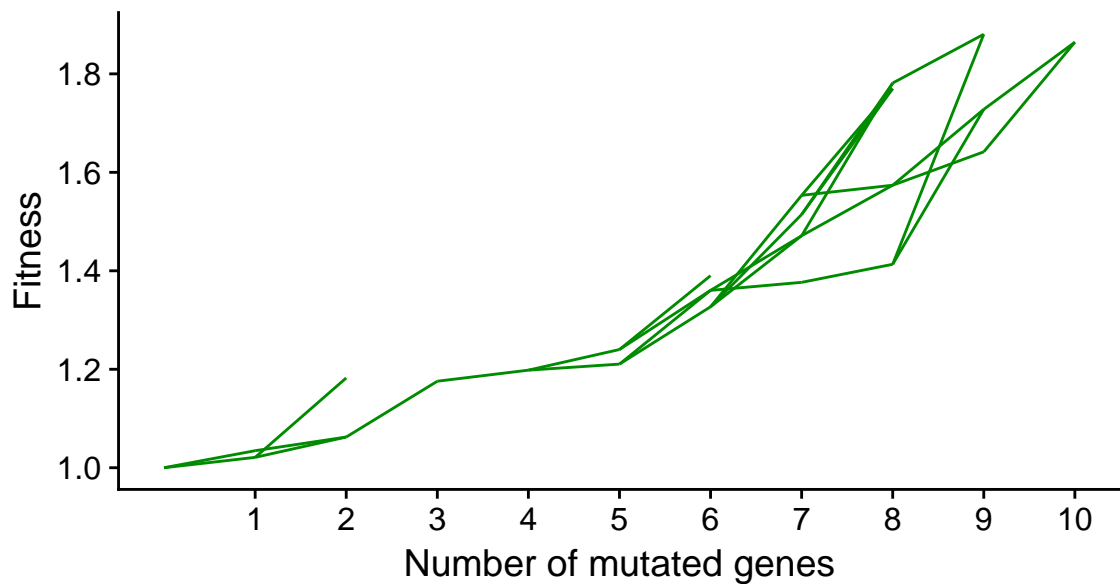

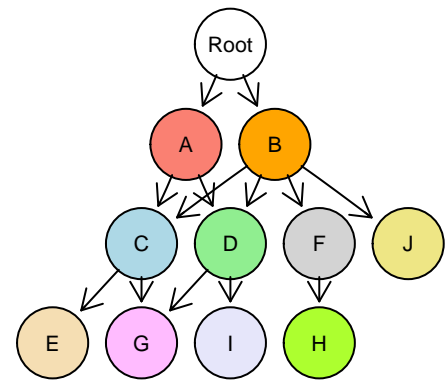

ID LZ8ykaYM2CcUTFrI  
 acc genotypes 86  
 peaks no back 10  
 removed edges 44  
 prop rem edges 0.194

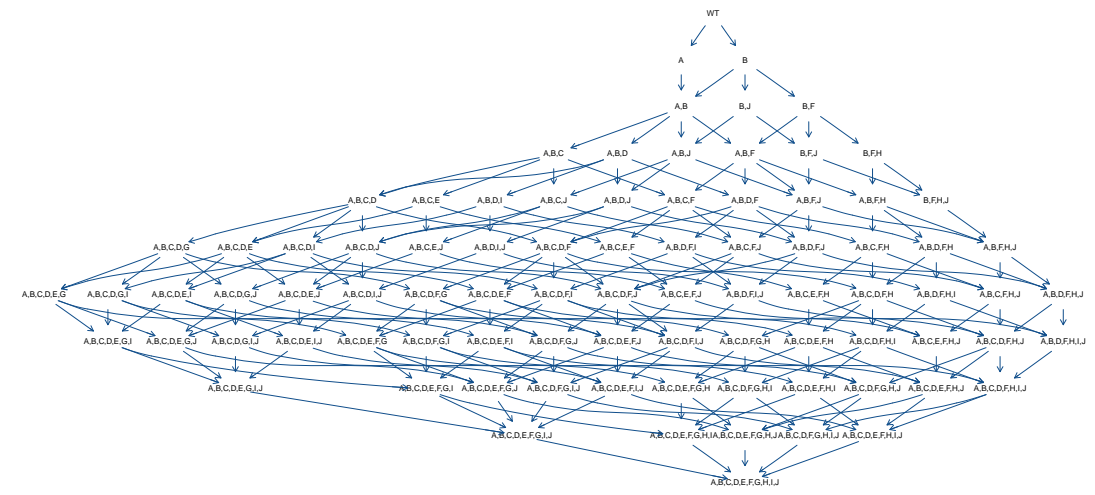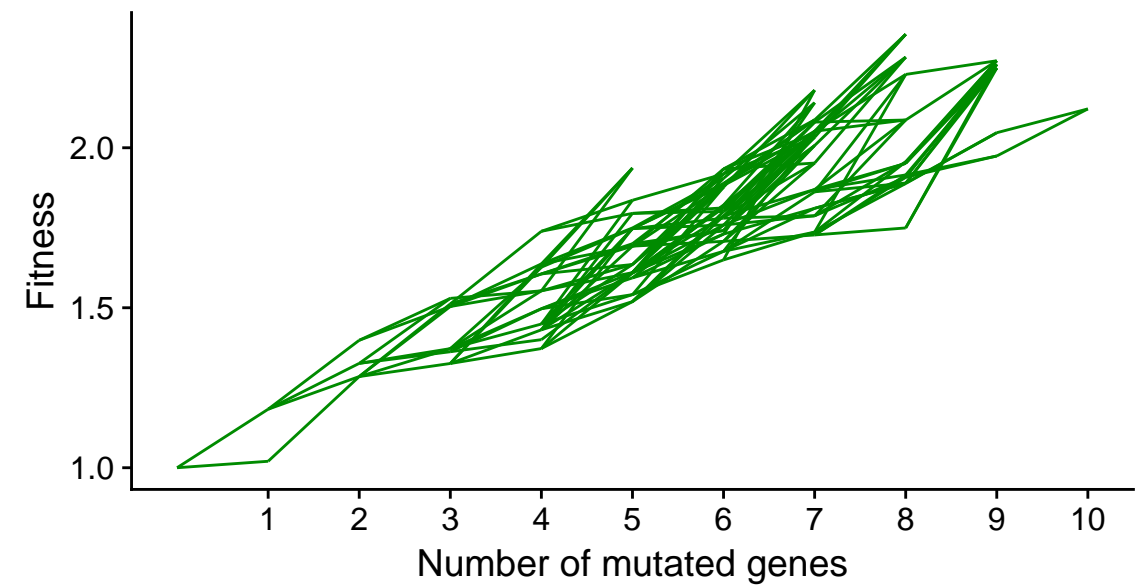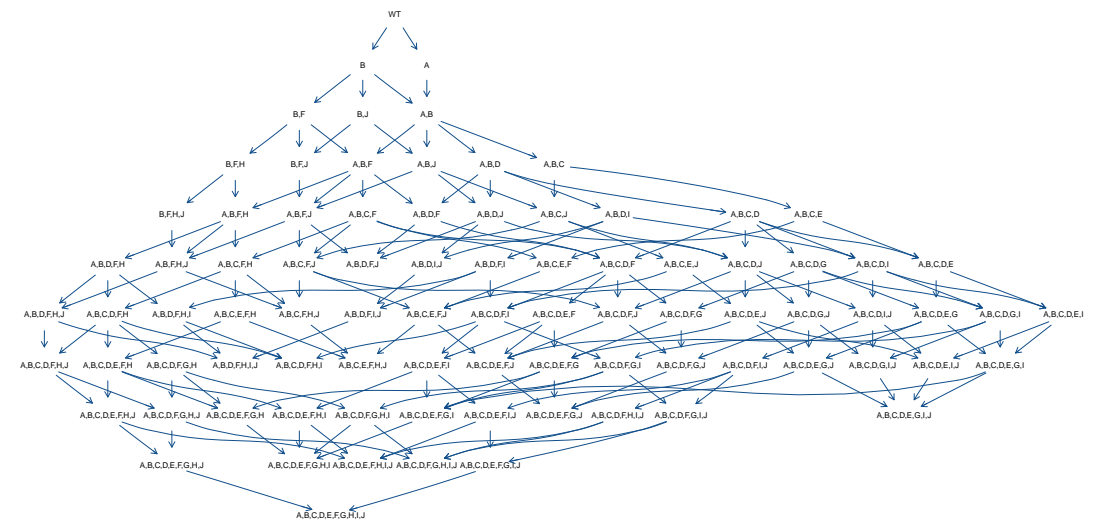

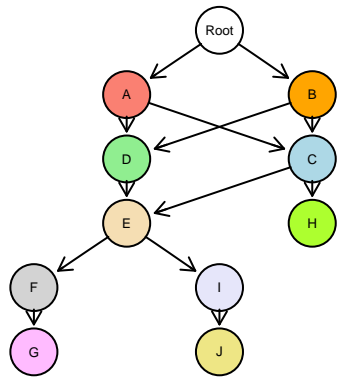

ID **m39LVsPQFf4Car10C**  
 acc genotypes **27**  
 peaks no back **4**  
 removed edges **6**  
 prop rem edges **0.13**

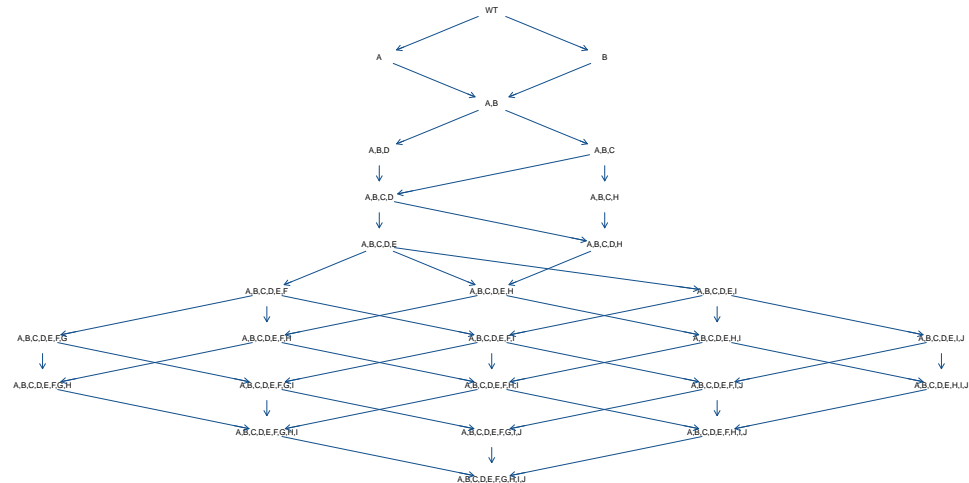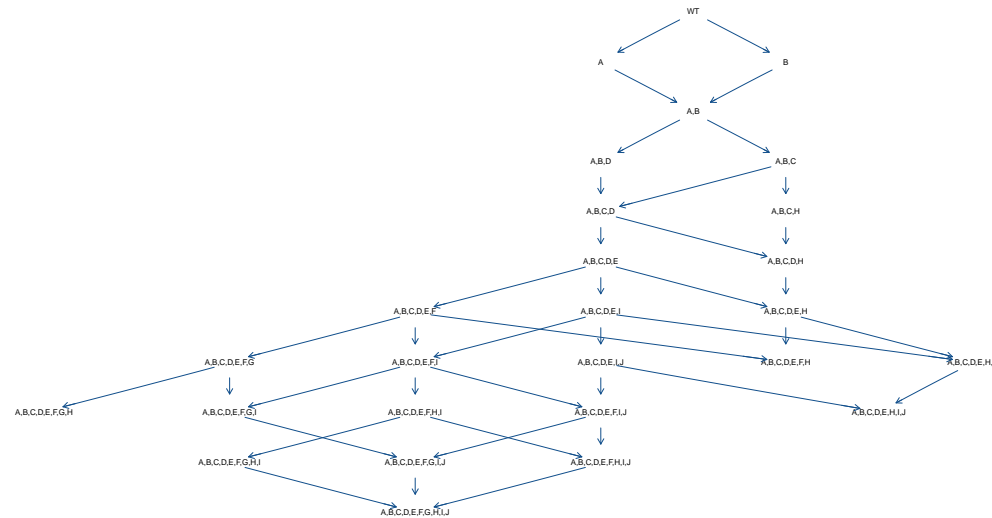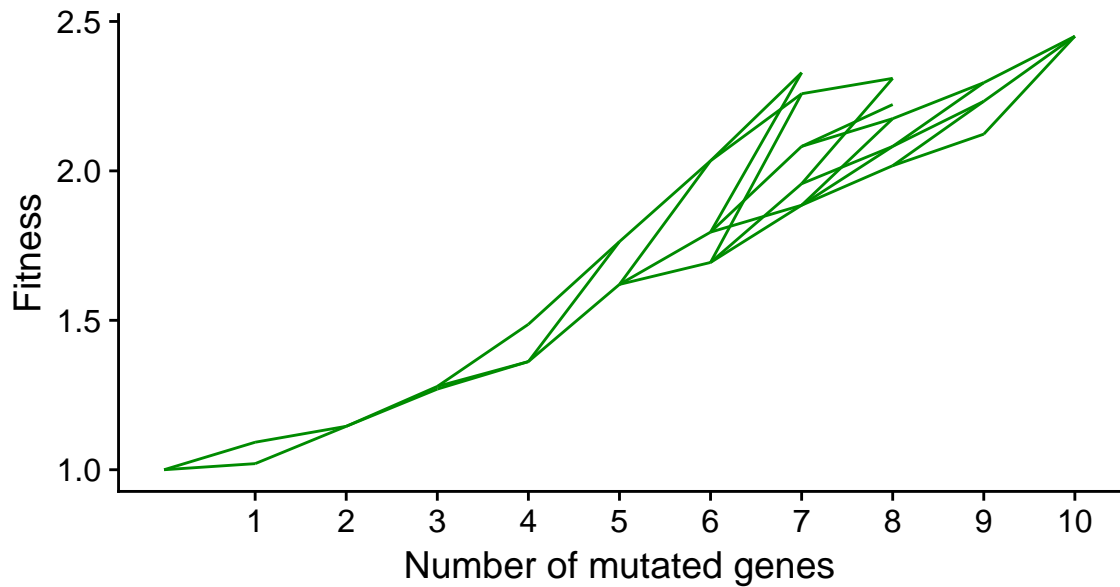

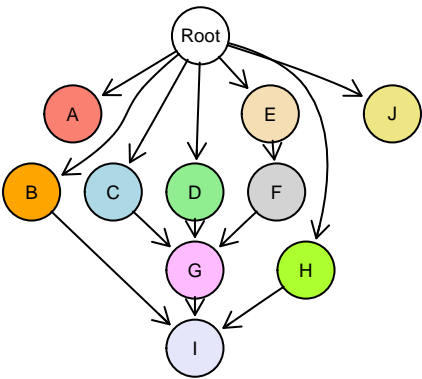

*ID* M7TqwZkMb4FqiZxL  
*acc genotypes* 212  
*peaks no back* 18  
*removed edges* 178  
*prop rem edges* 0.234

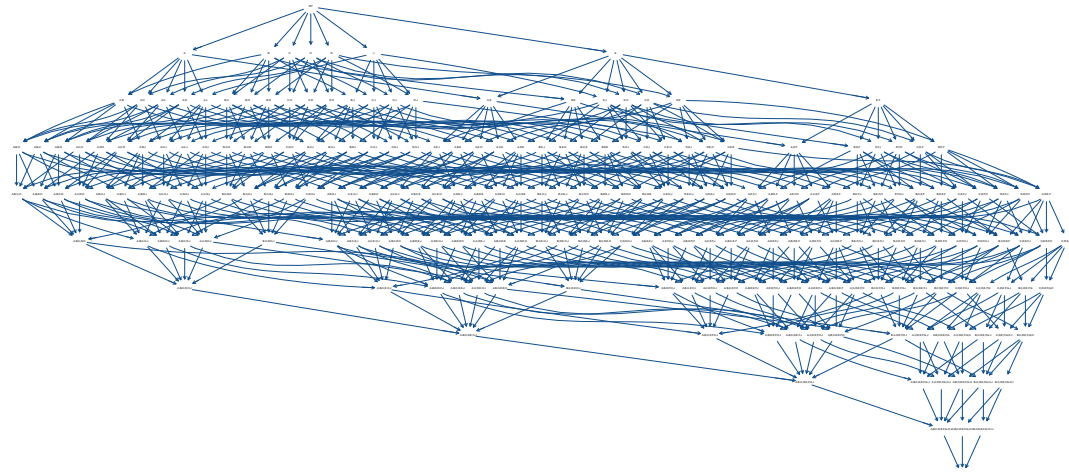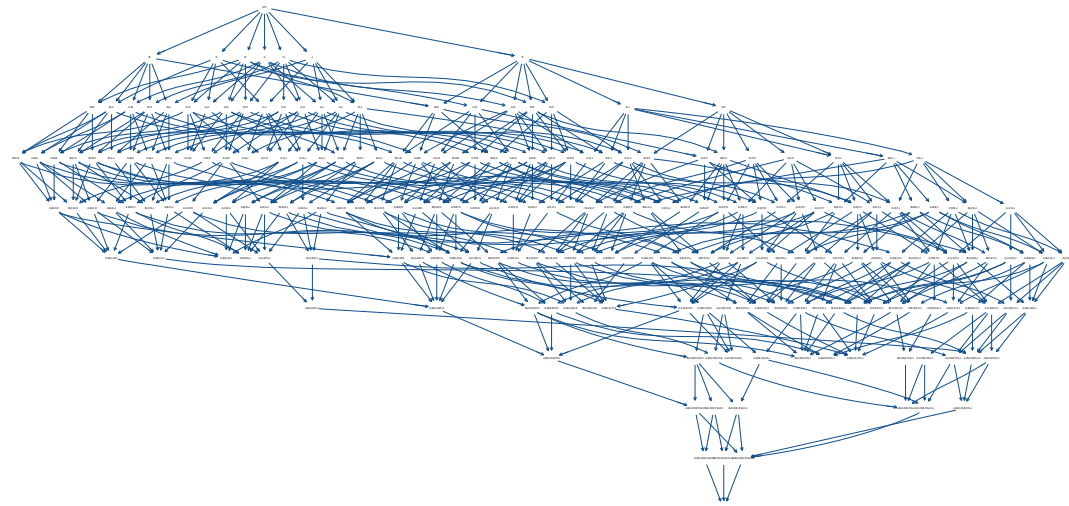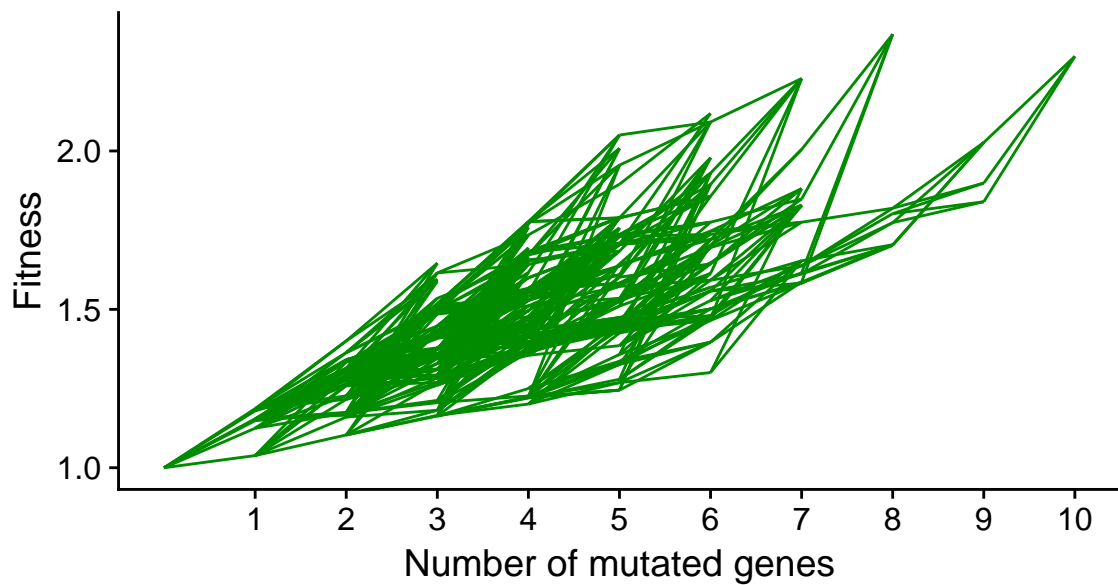

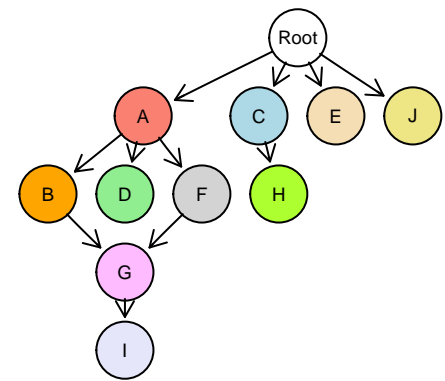

ID MbPTZwyHjCzW5F3T  
 acc genotypes 156  
 peaks no back 12  
 removed edges 87  
 prop rem edges 0.178

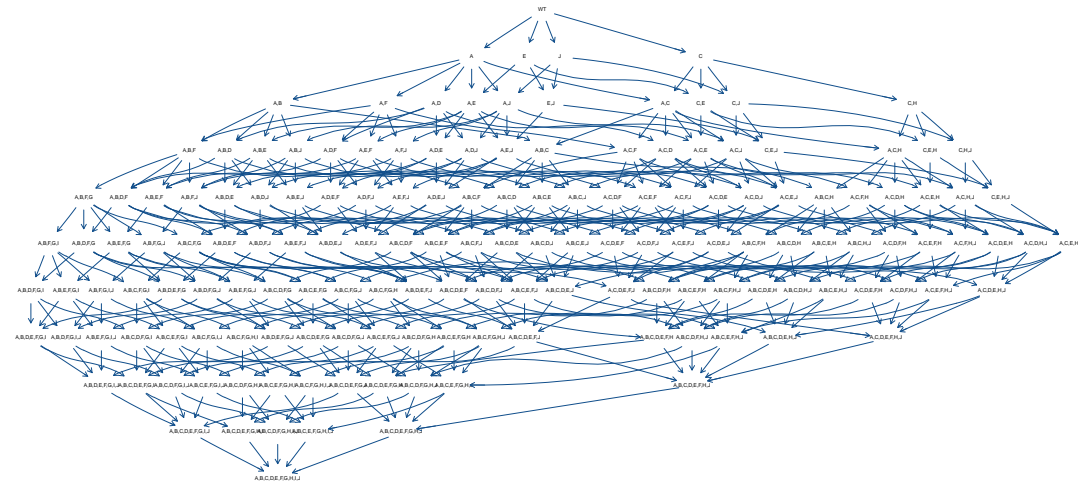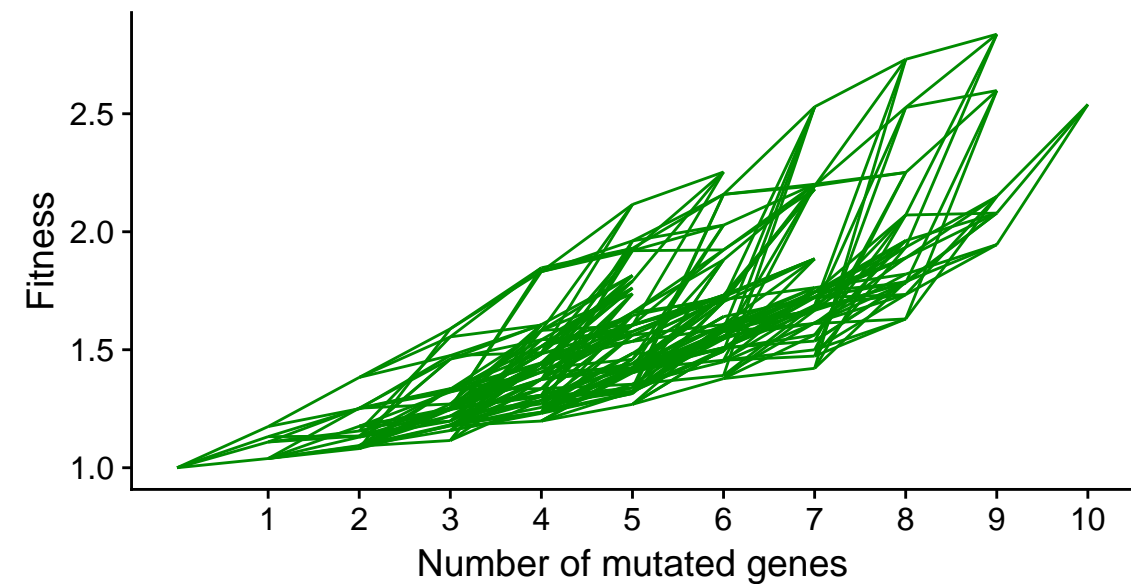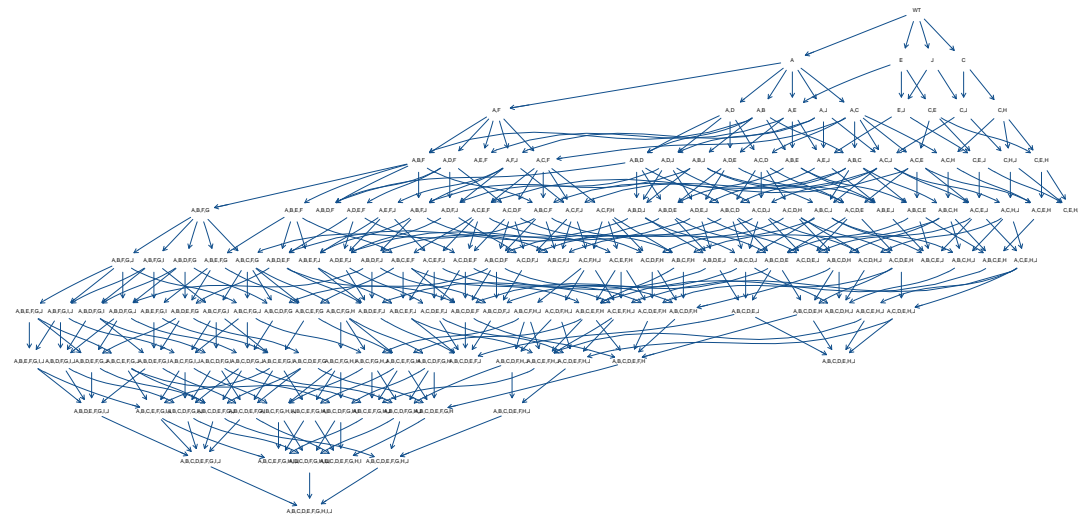

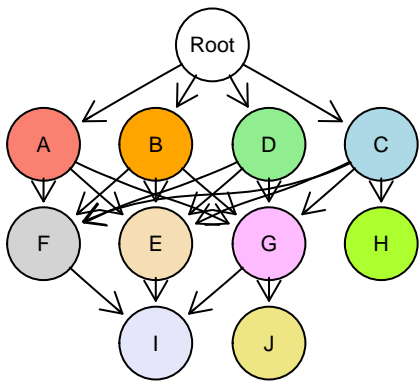

ID **MEBeweDPZbszojRQ**  
 acc genotypes **50**  
 peaks no back **9**  
 removed edges **20**  
 prop rem edges **0.18**

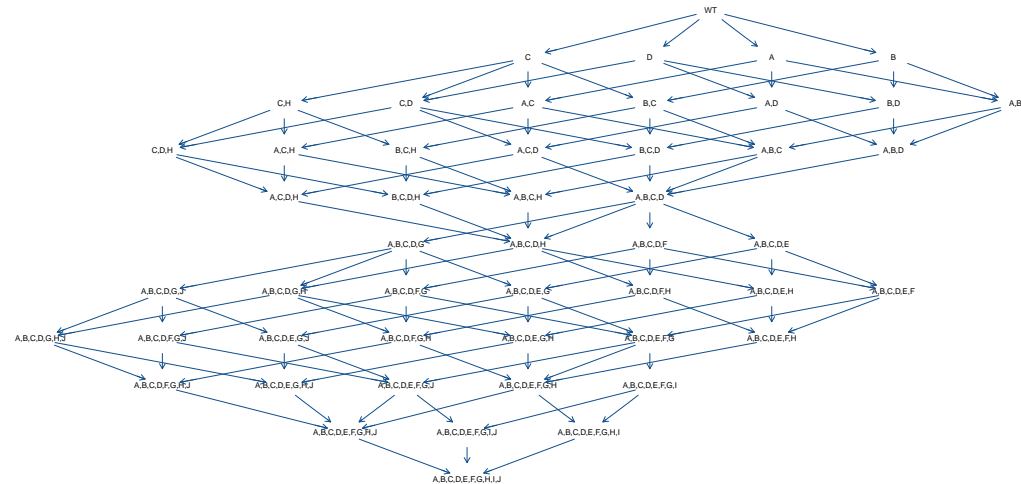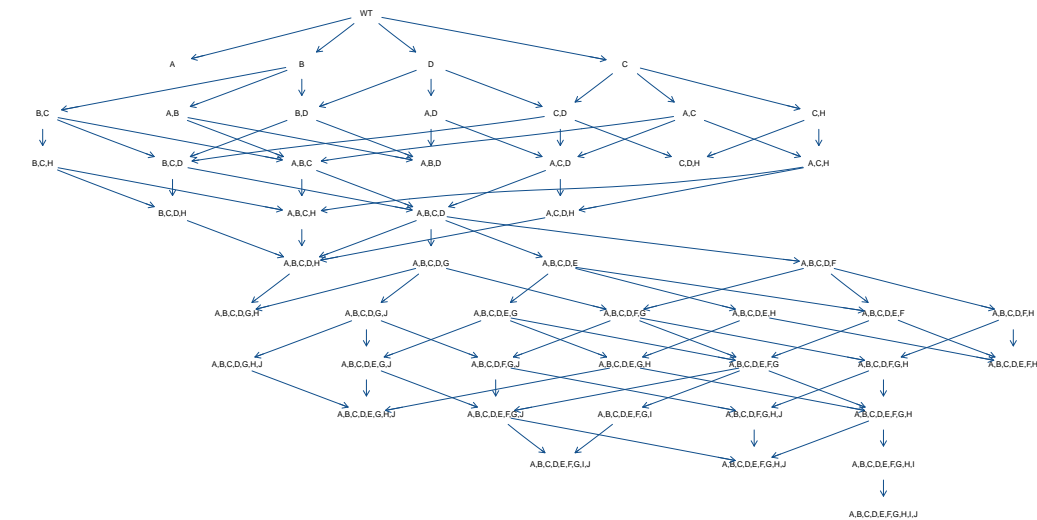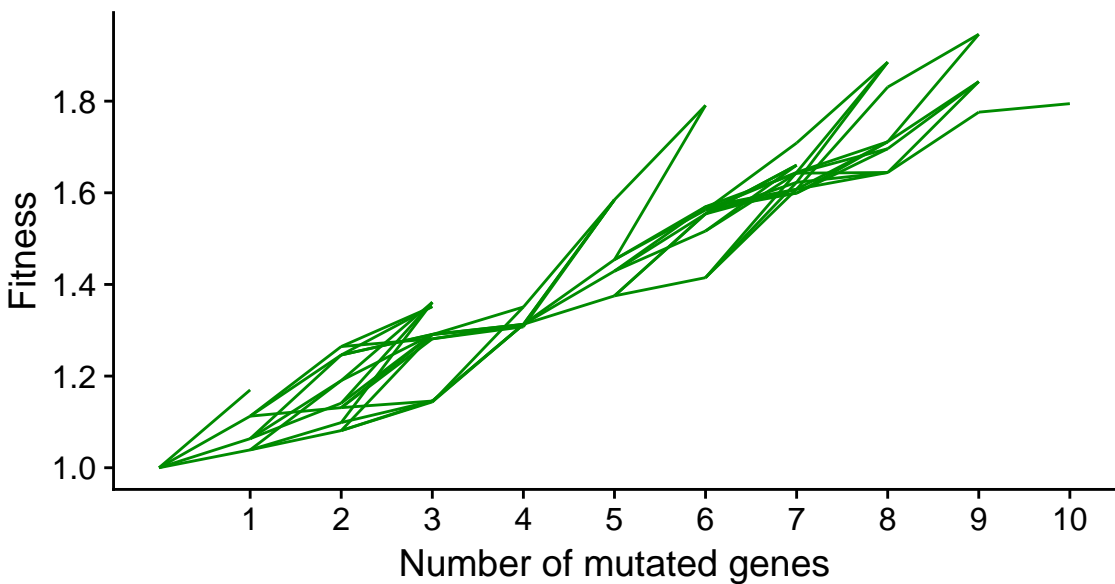

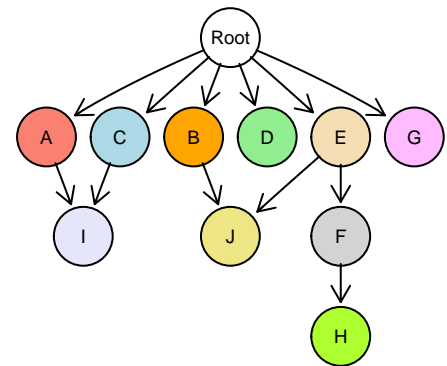

*ID* MeQOZBLaWrCfm8Ns  
*acc genotypes* 220  
*peaks no back* 19  
*removed edges* 135  
*prop rem edges* 0.182

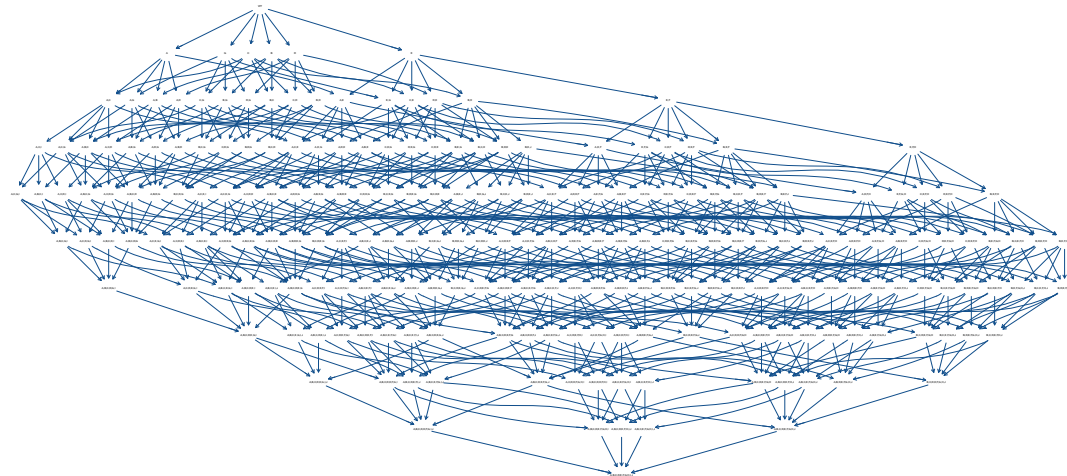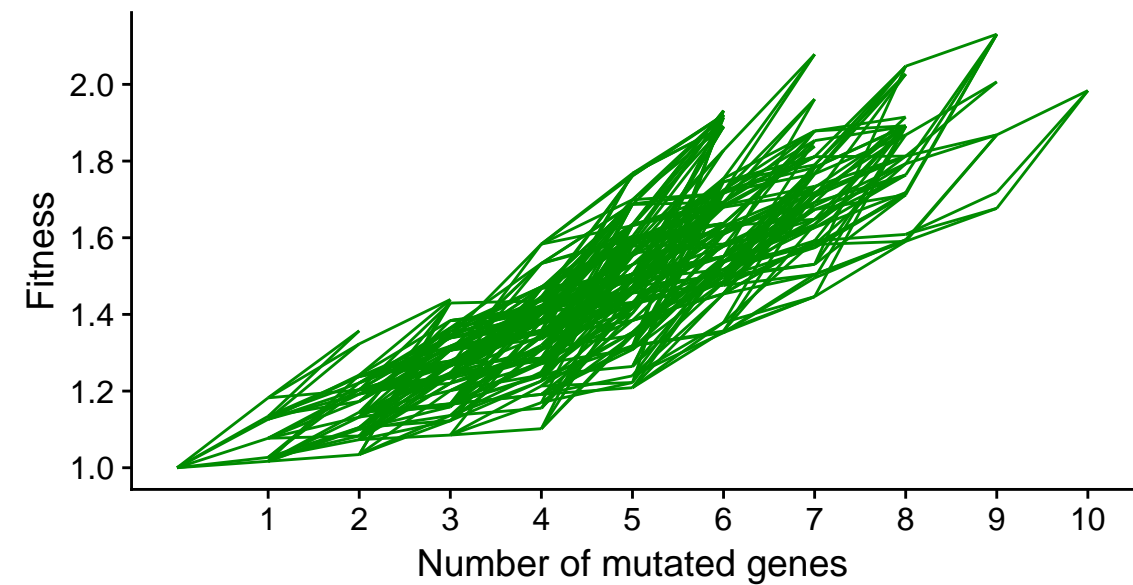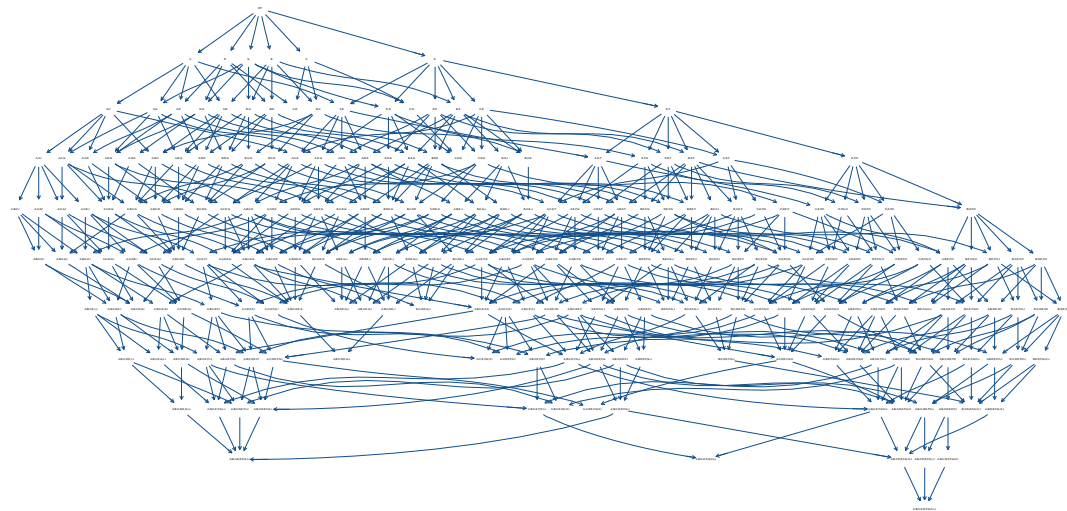

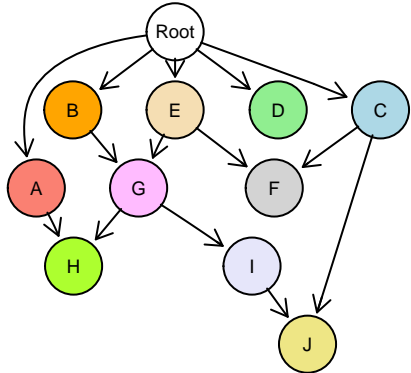

*ID* mHOgZGLqndvBGxt  
*acc genotypes* 88  
*peaks no back* 10  
*removed edges* 35  
*prop rem edges* 0.154

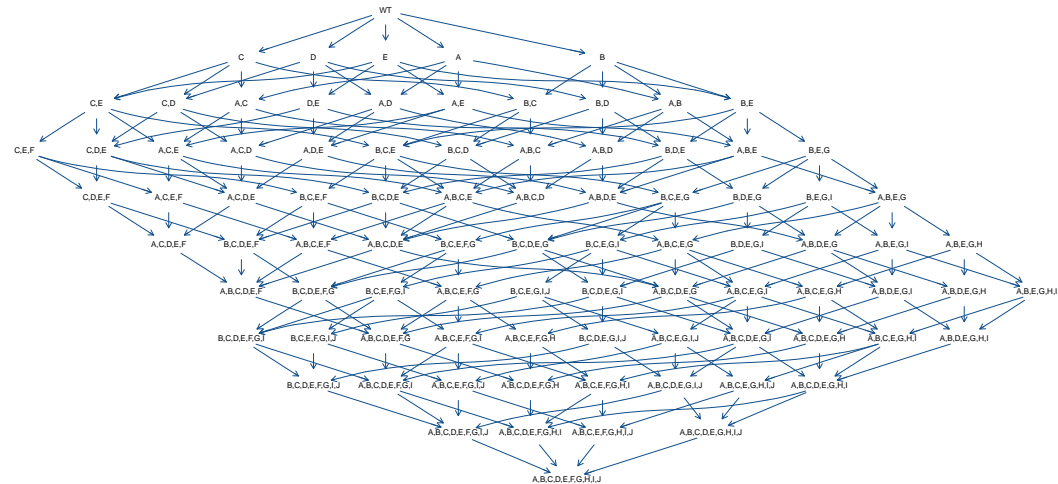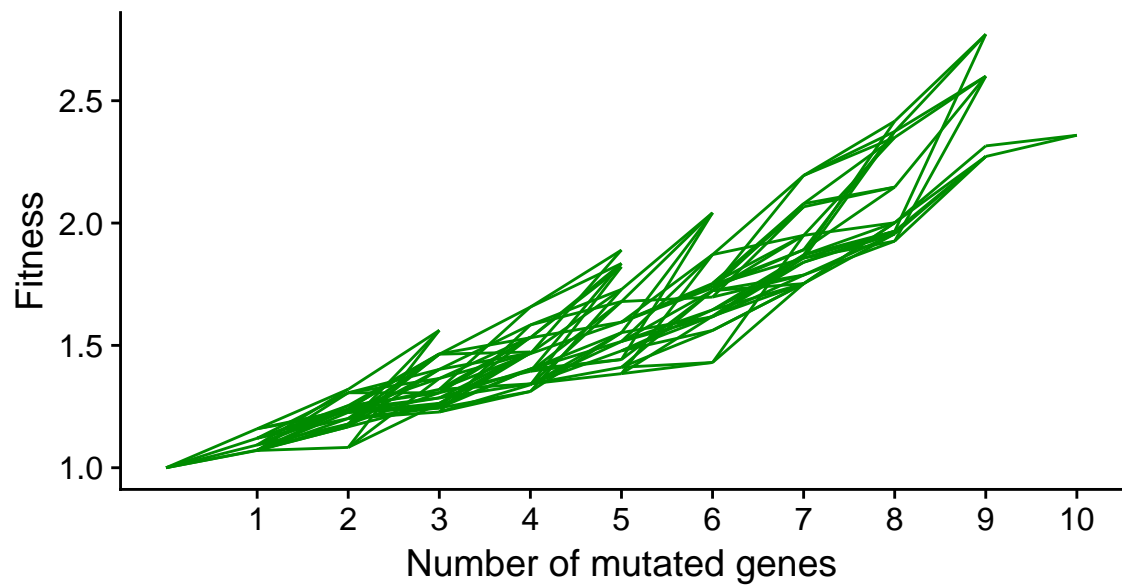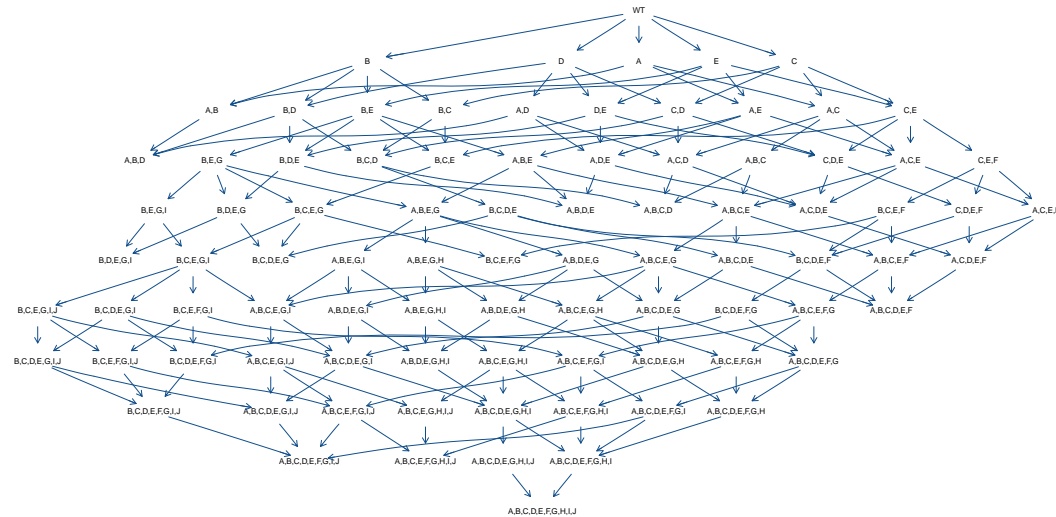



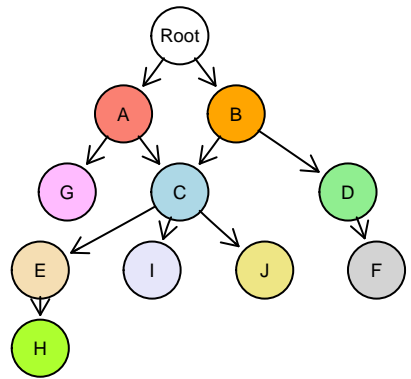

ID **mHXf10tSNigHlcwWO**  
 acc genotypes **84**  
 peaks no back **9**  
 removed edges **44**  
 prop rem edges **0.194**

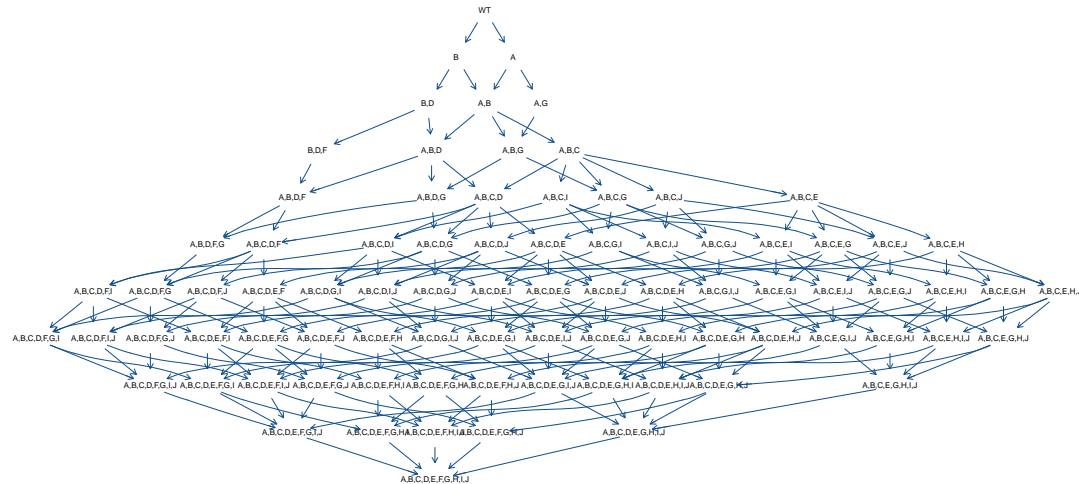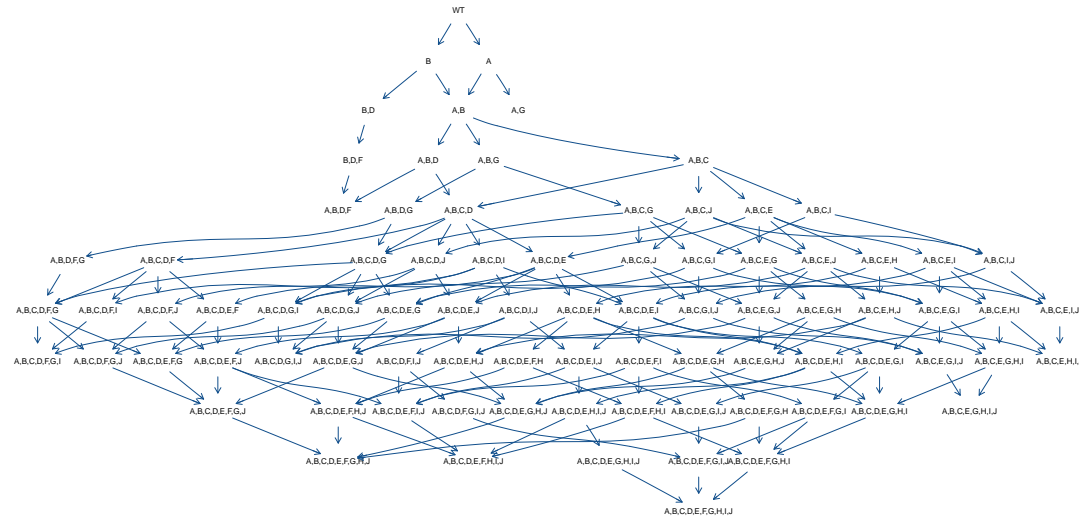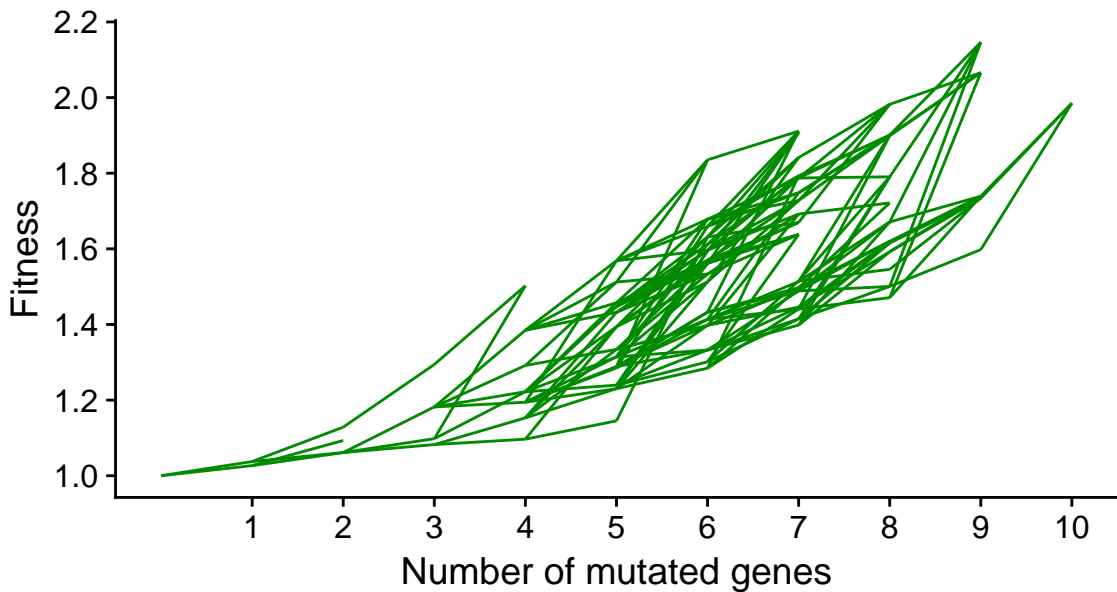

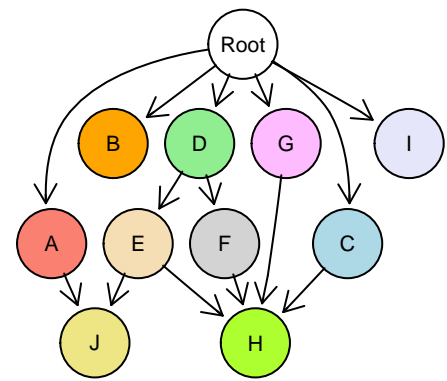

ID MW1p5m710opywel6d  
 acc genotypes 204  
 peaks no back 15  
 removed edges 126  
 prop rem edges 0.179

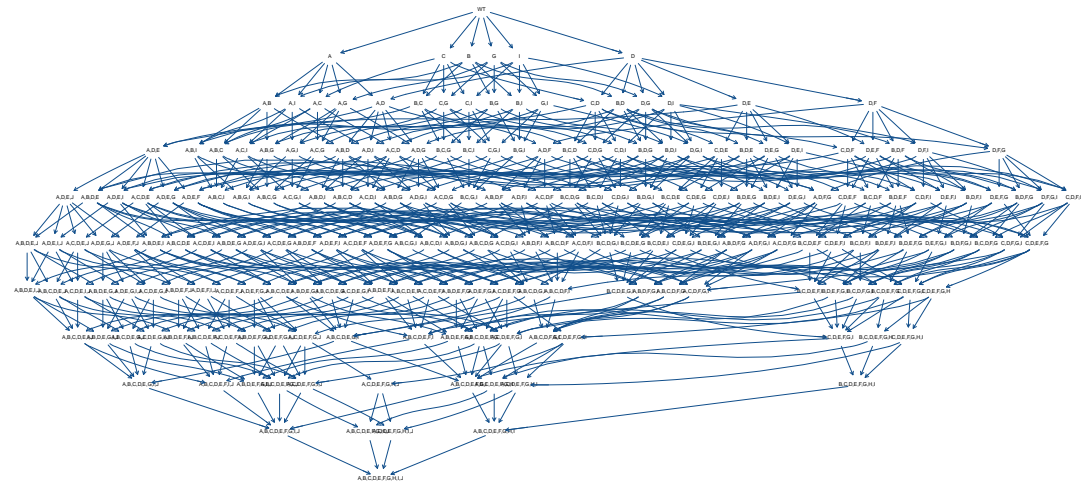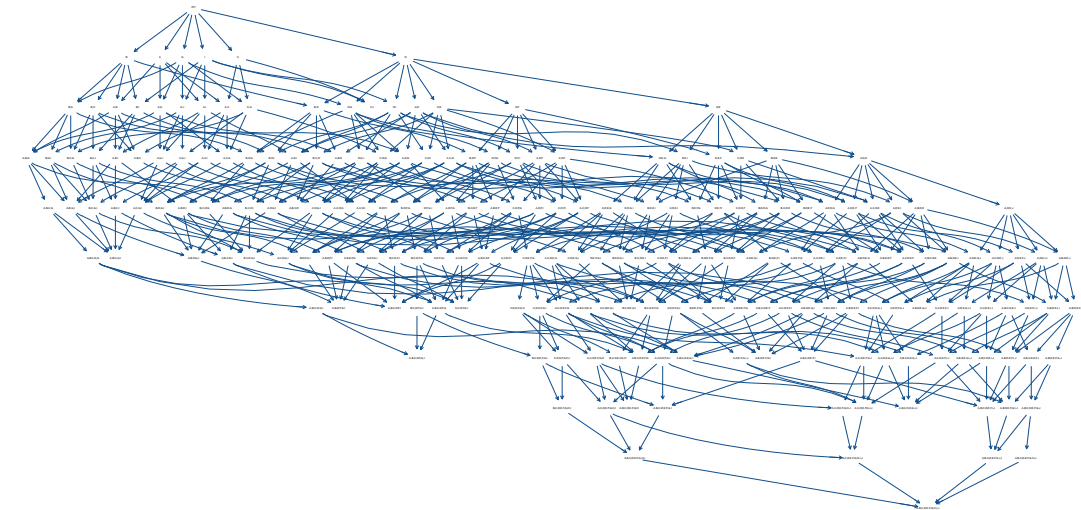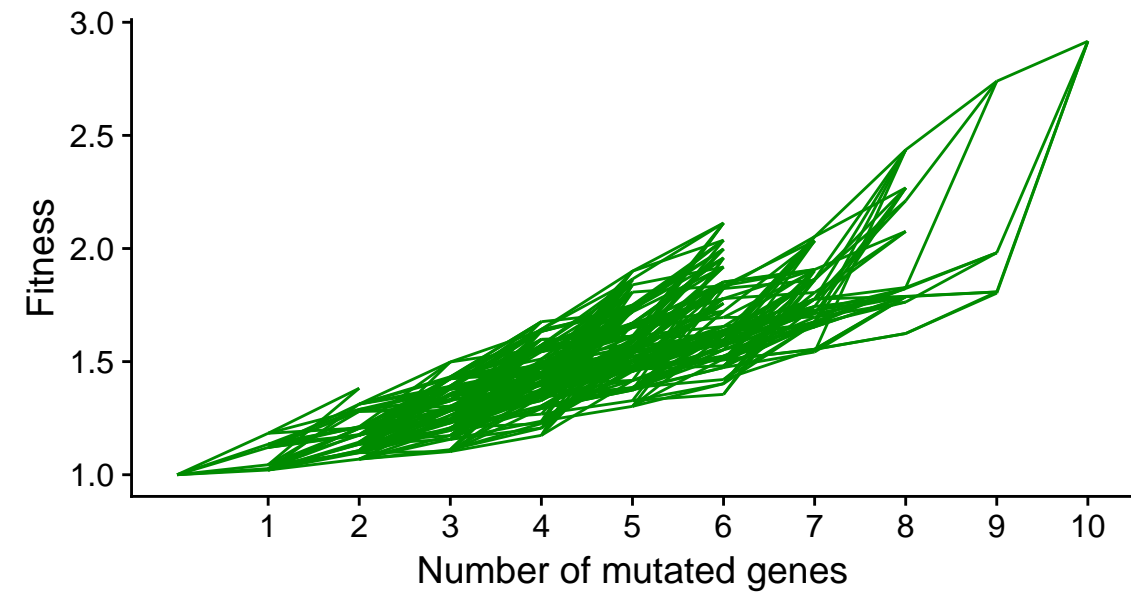

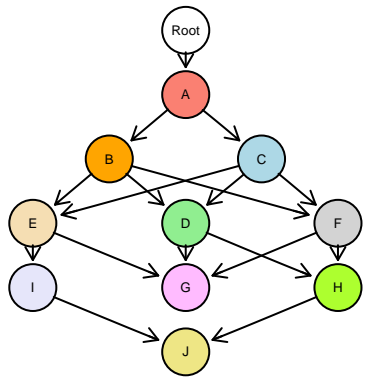

ID **N3AGZj5WtBq10w7rq**  
 acc genotypes **25**  
 peaks no back **5**  
 removed edges **6**  
 prop rem edges **0.146**

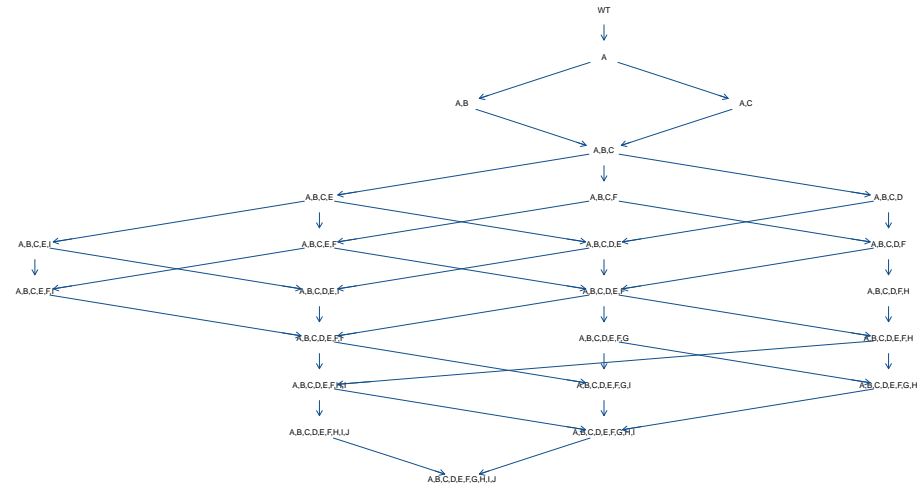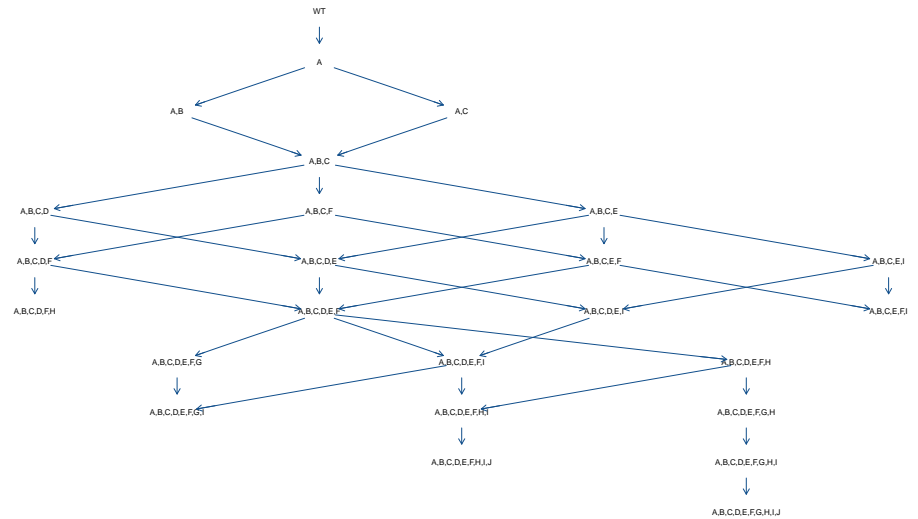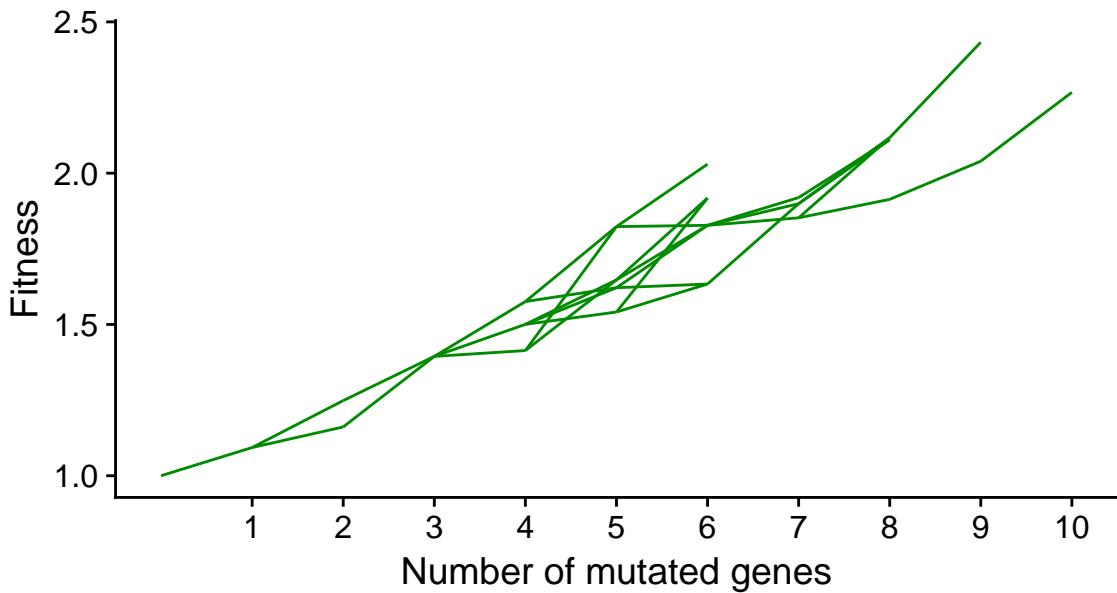

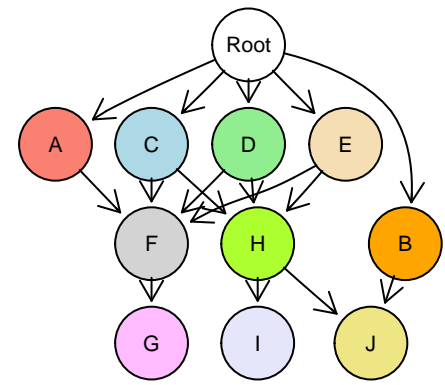

ID **n3mpftu4orkSLBLy**  
 acc genotypes **60**  
 peaks no back **10**  
 removed edges **25**  
 prop rem edges **0.179**

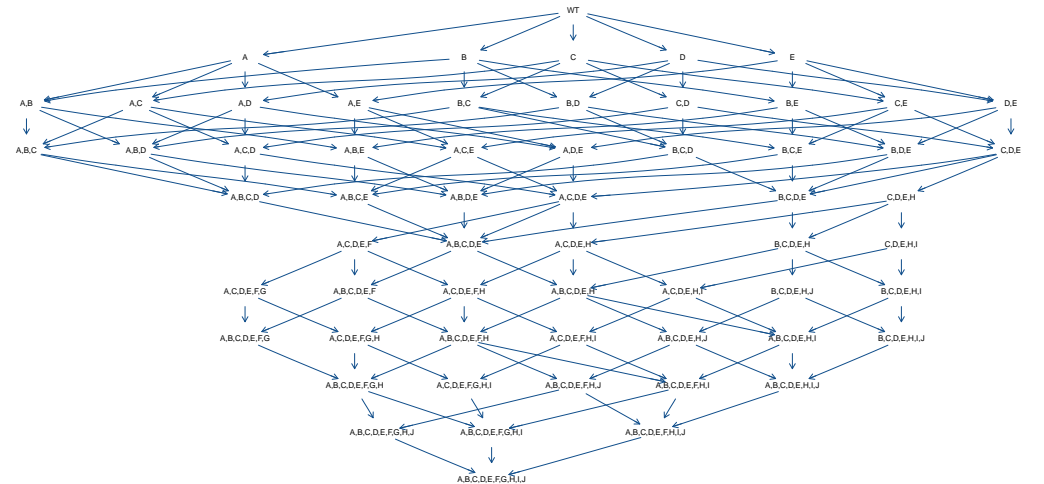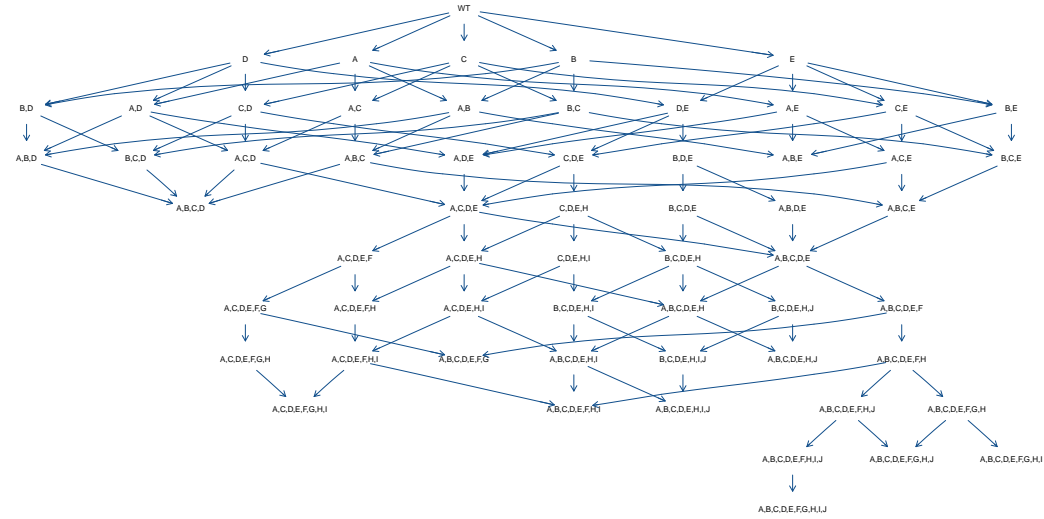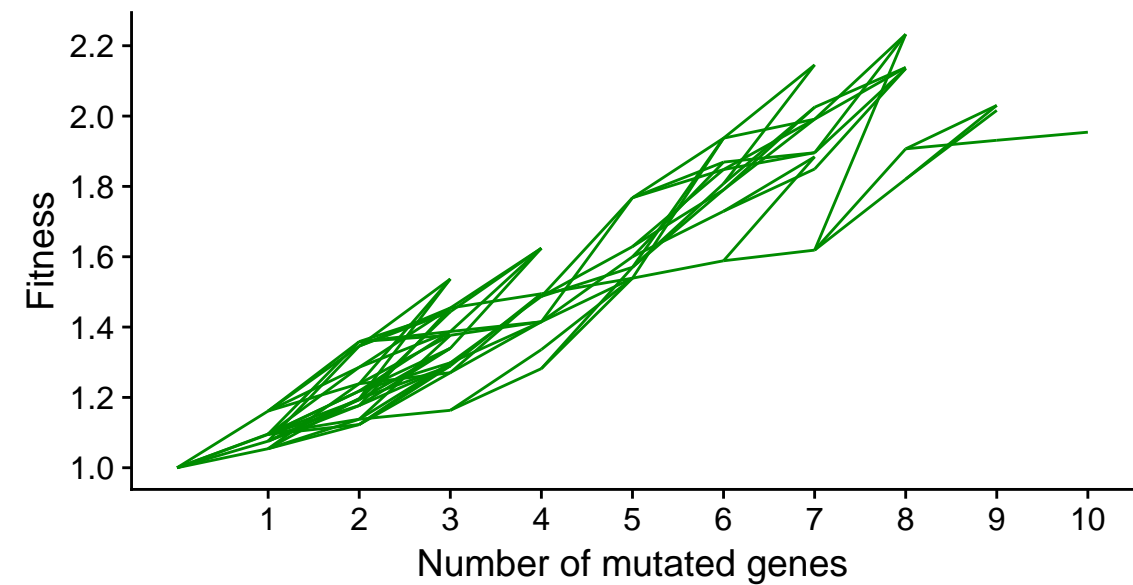

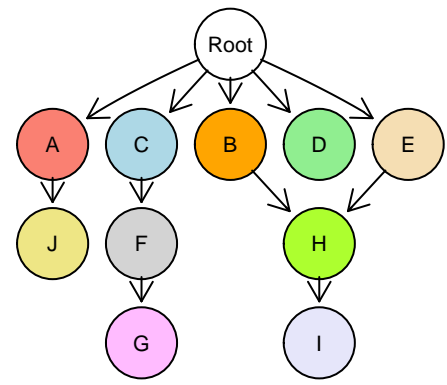

*ID* n67tOyWUKcVonUTn  
*acc genotypes* 144  
*peaks no back* 11  
*removed edges* 76  
*prop rem edges* 0.181

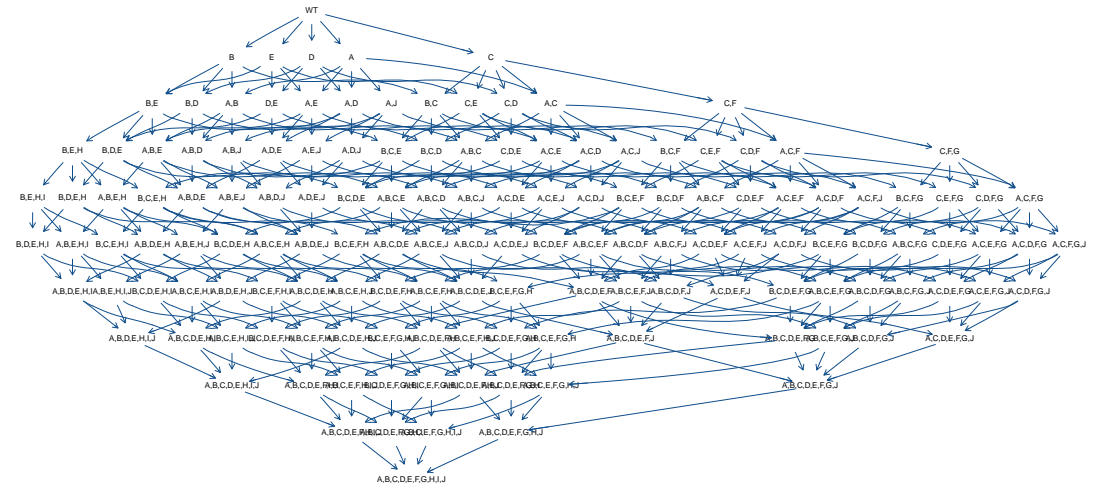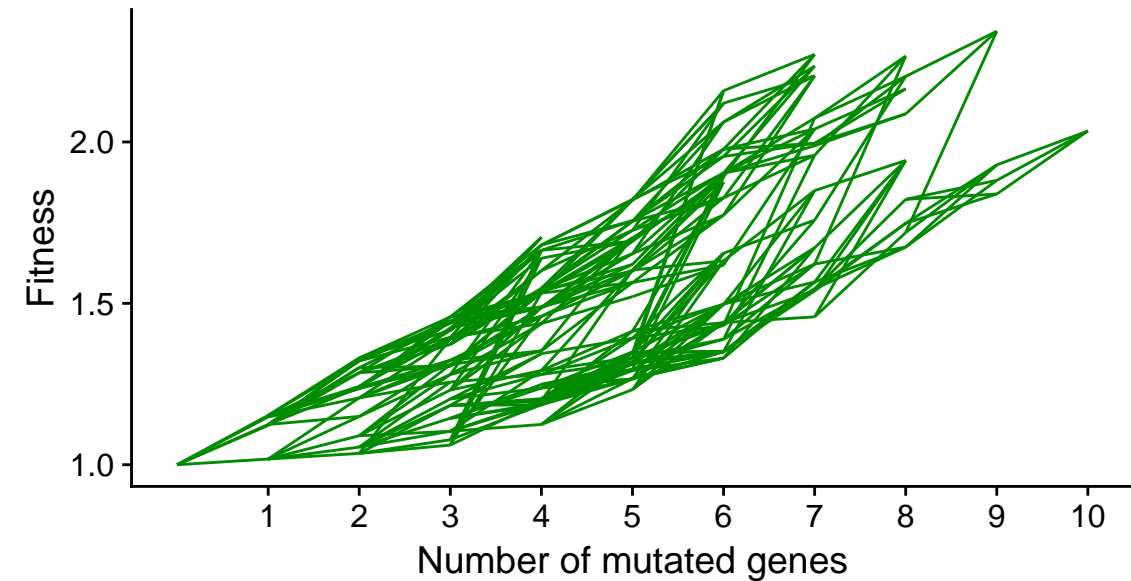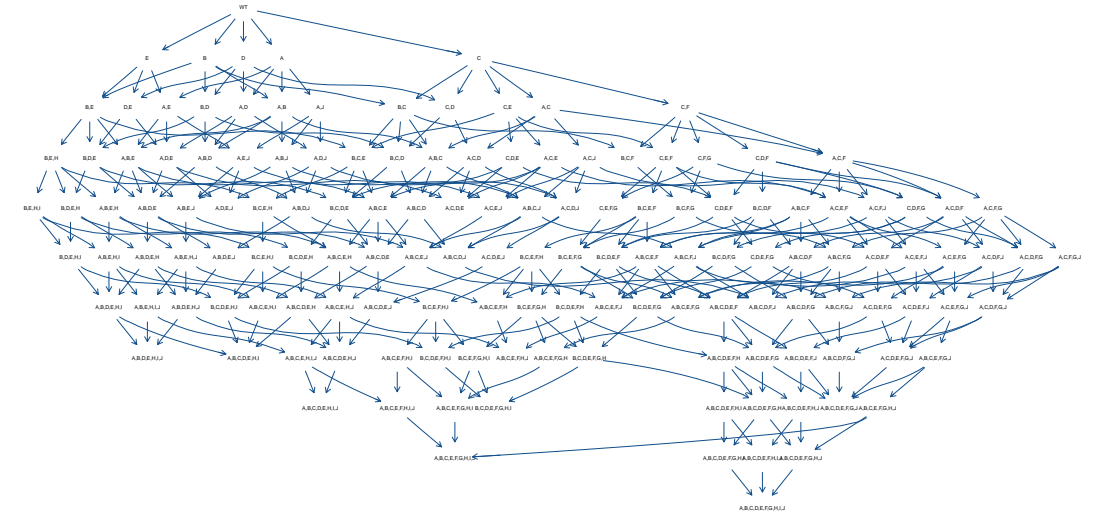

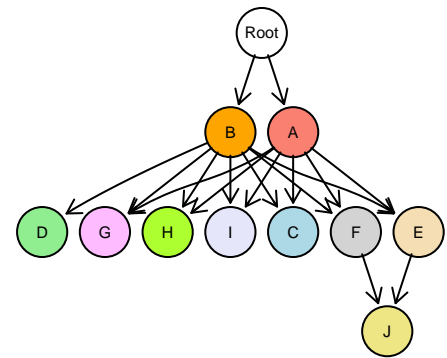

ID **n6N43lpBlanX2OCS**  
 acc genotypes **164**  
 peaks no back **15**  
 removed edges **95**  
 prop rem edges **0.168**

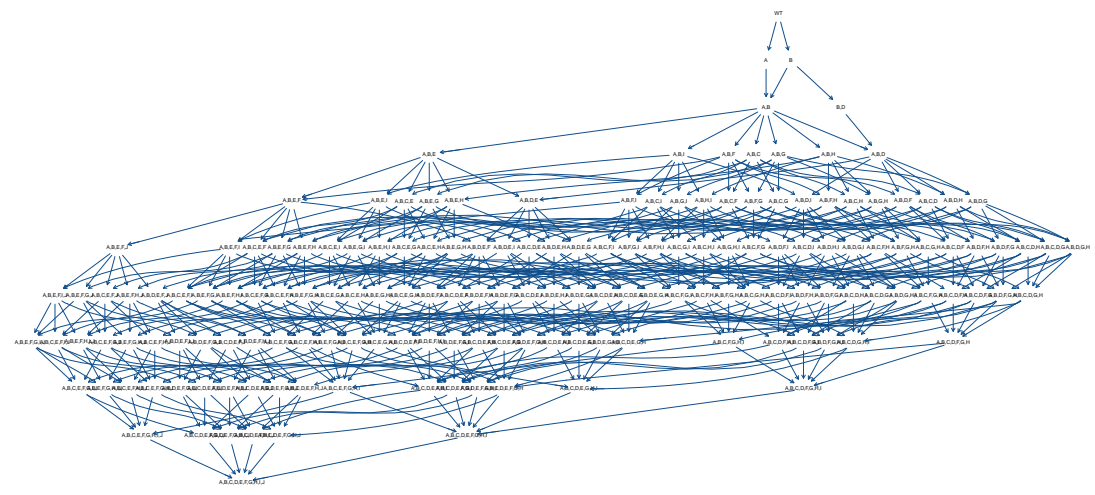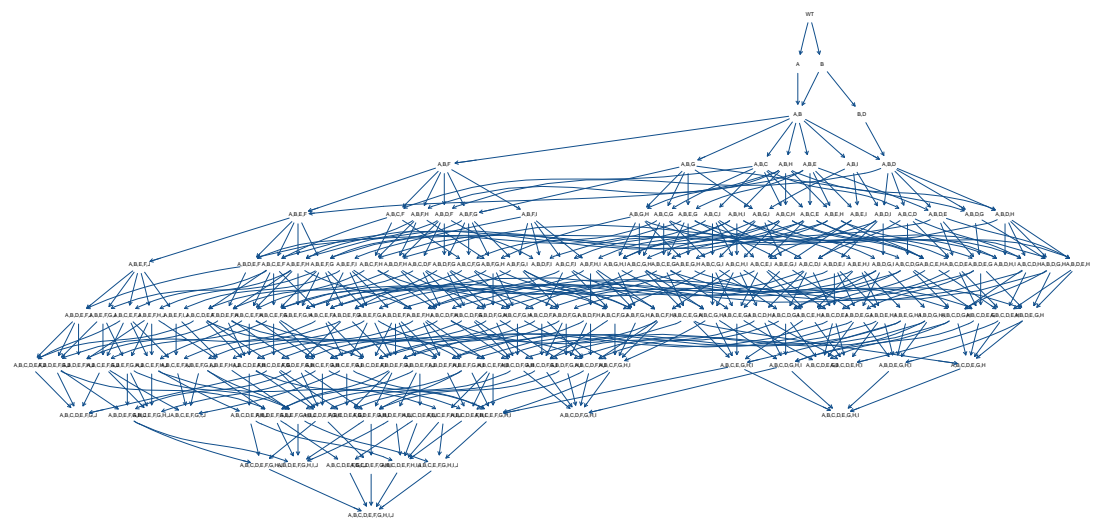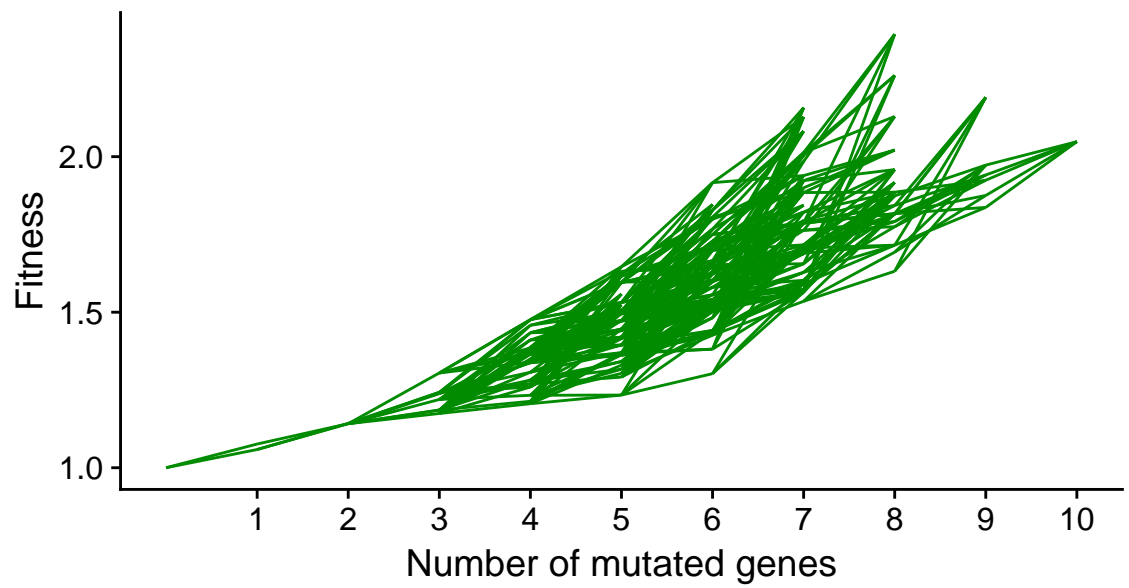

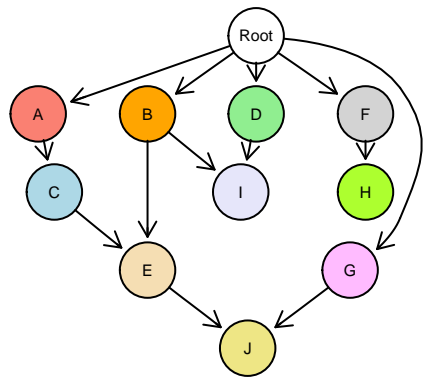

ID **NHvOV5oluQFLza23**  
 acc genotypes **117**  
 peaks no back **11**  
 removed edges **59**  
 prop rem edges **0.18**

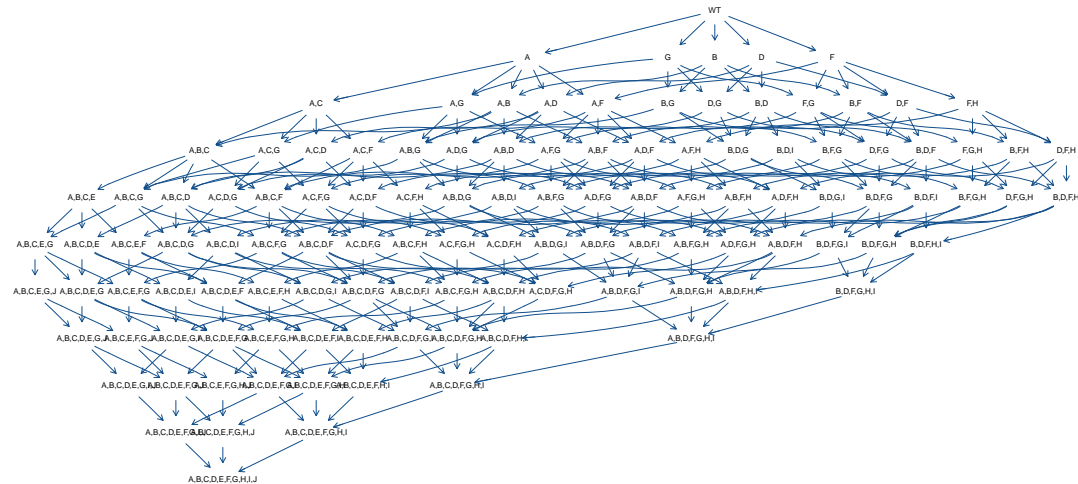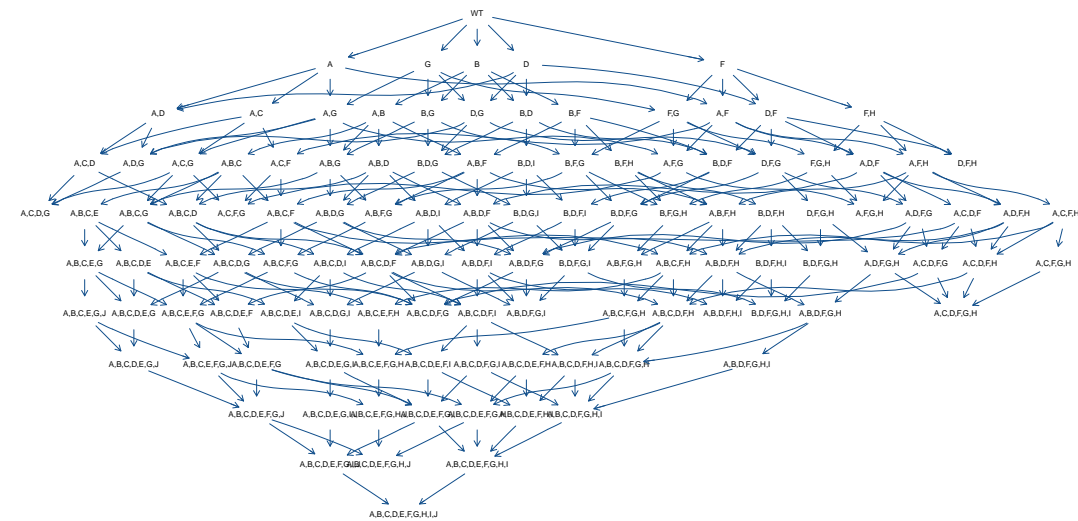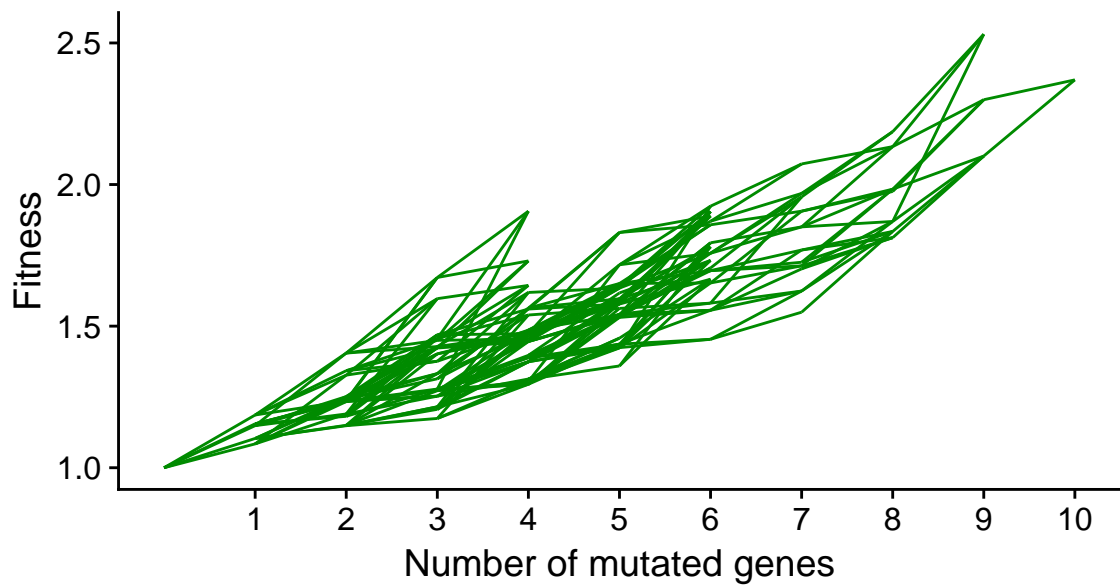

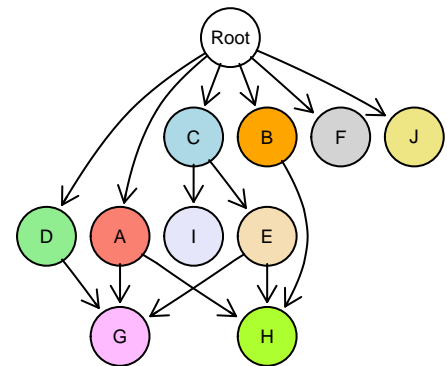

*ID* nLayuUMxBrwliw43  
*acc genotypes* 200  
*peaks no back* 17  
*removed edges* 135  
*prop rem edges* 0.197

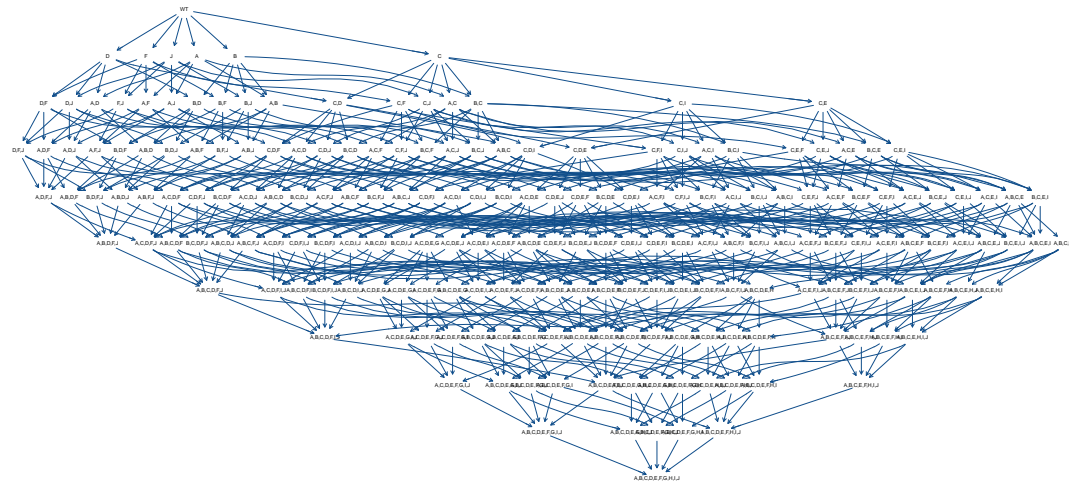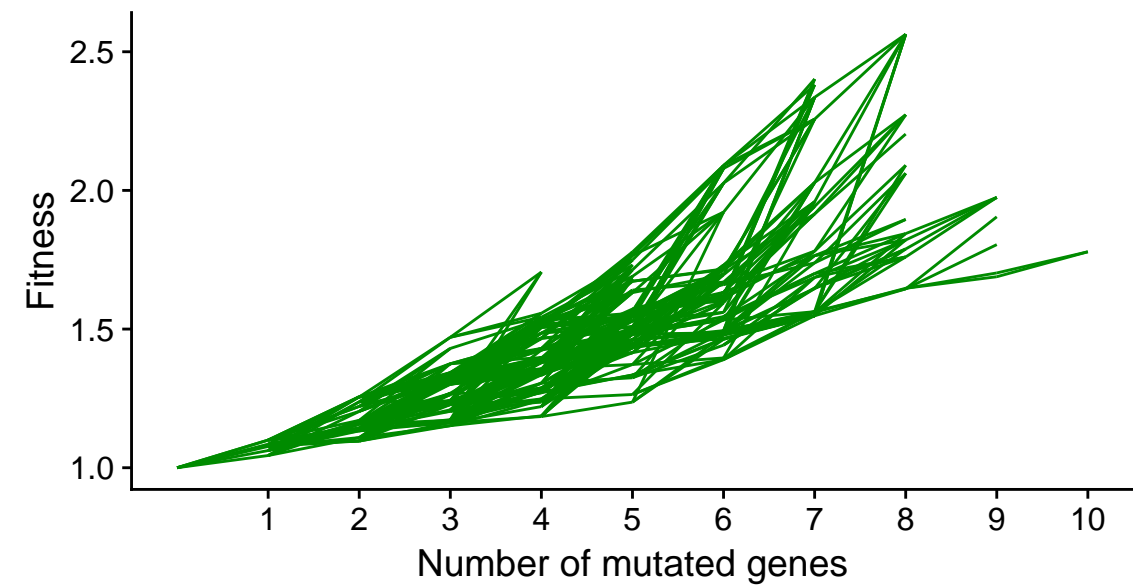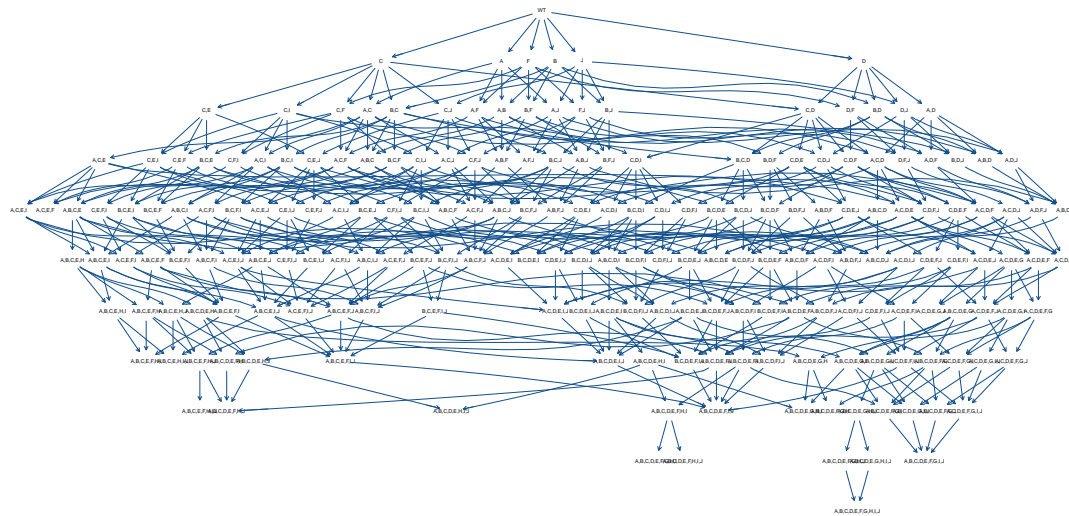



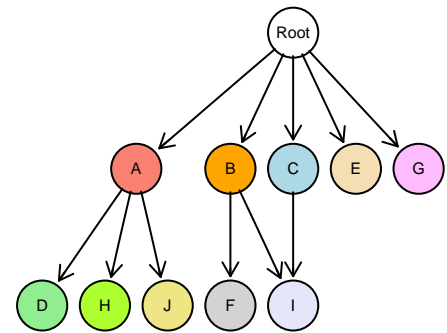

*ID* nOAHFfiFZ4dc4UPV  
*acc genotypes* 288  
*peaks no back* 24  
*removed edges* 255  
*prop rem edges* 0.24

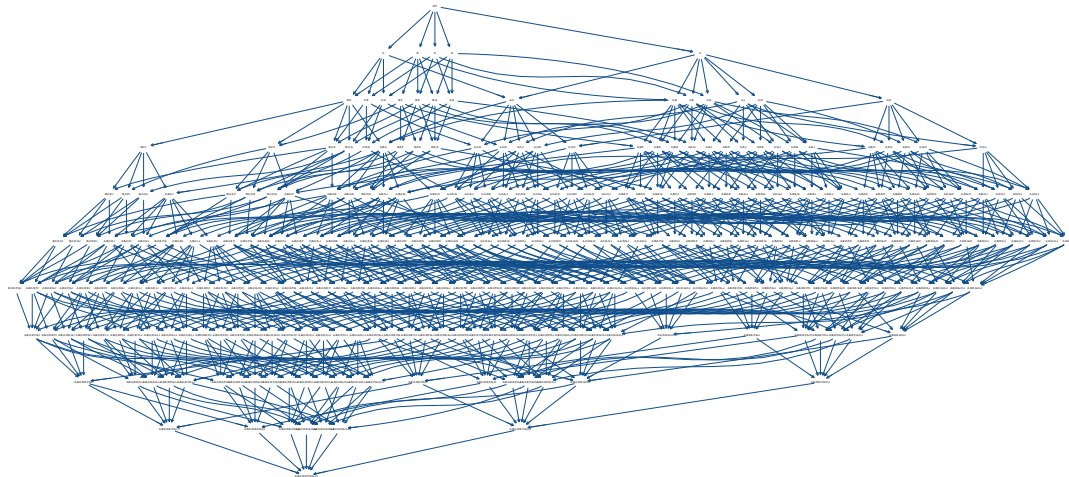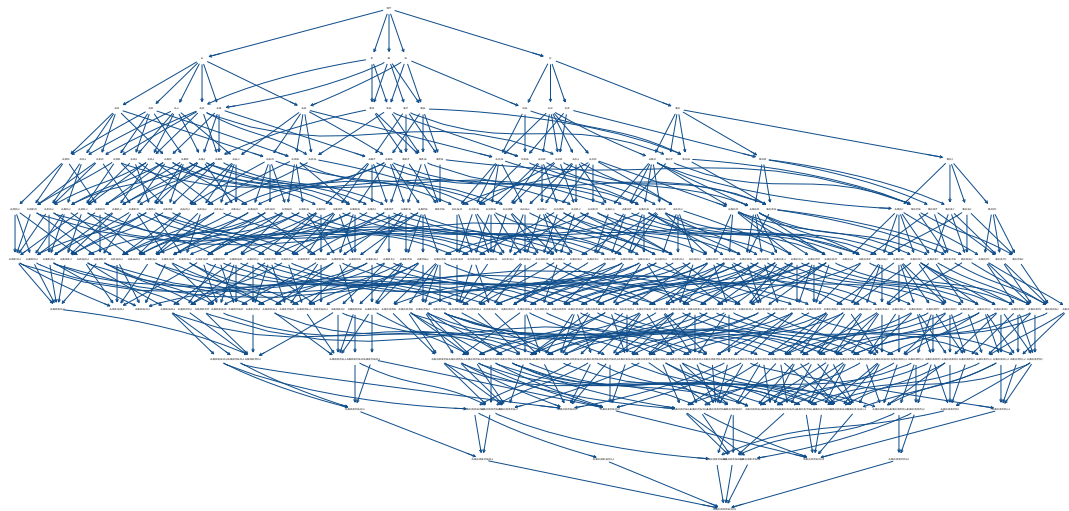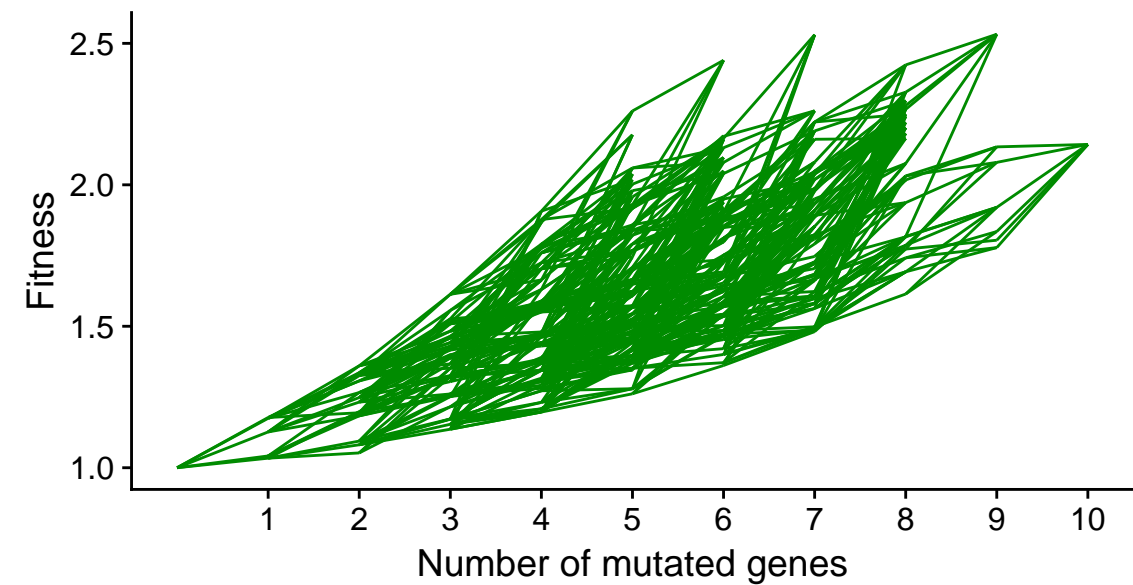

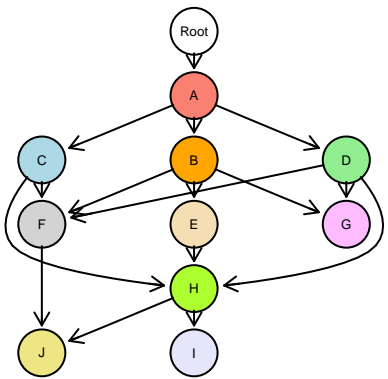

ID **noHAVtQI4KdH8hEq**  
 acc genotypes **33**  
 peaks no back **5**  
 removed edges **12**  
 prop rem edges **0.197**

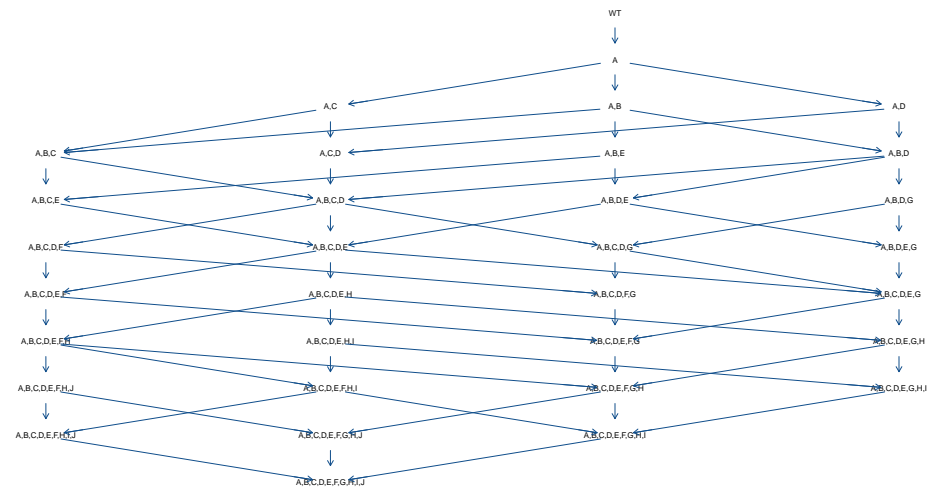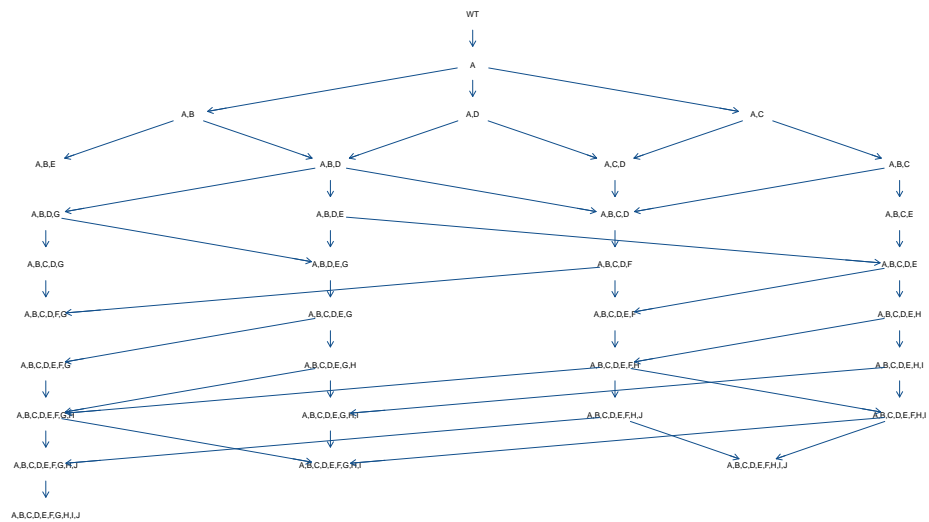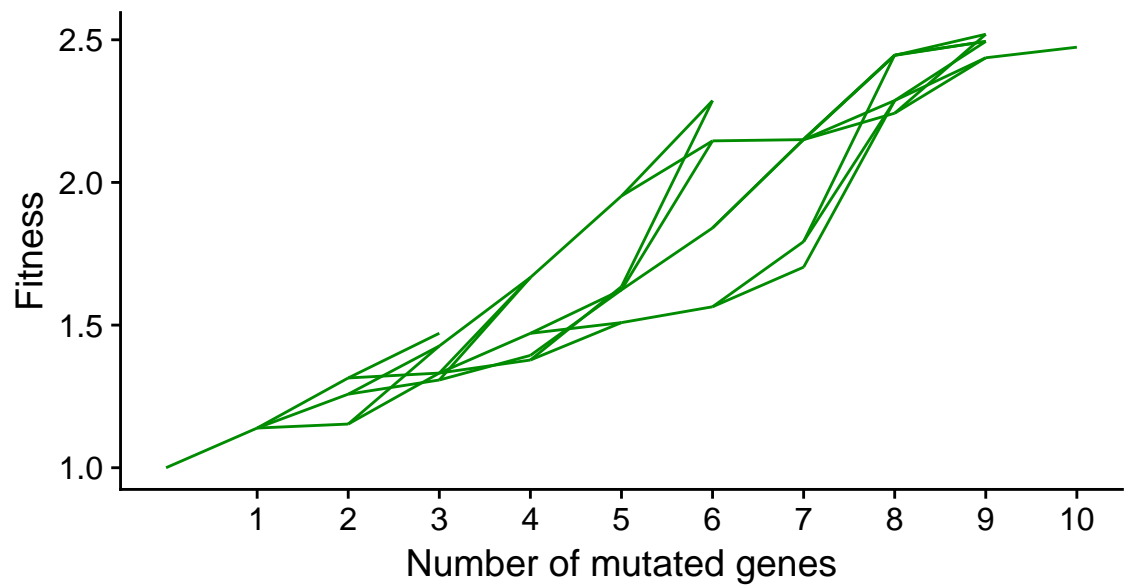

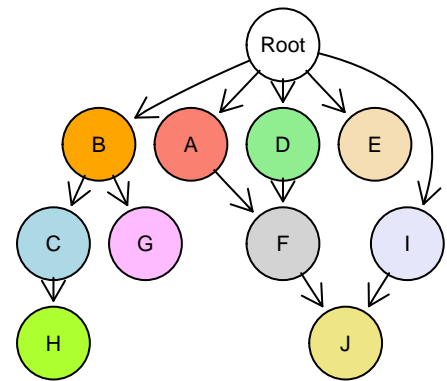

ID **NSqT8kGDJ9iU108hE**  
 acc genotypes **154**  
 peaks no back **11**  
 removed edges **75**  
 prop rem edges **0.157**

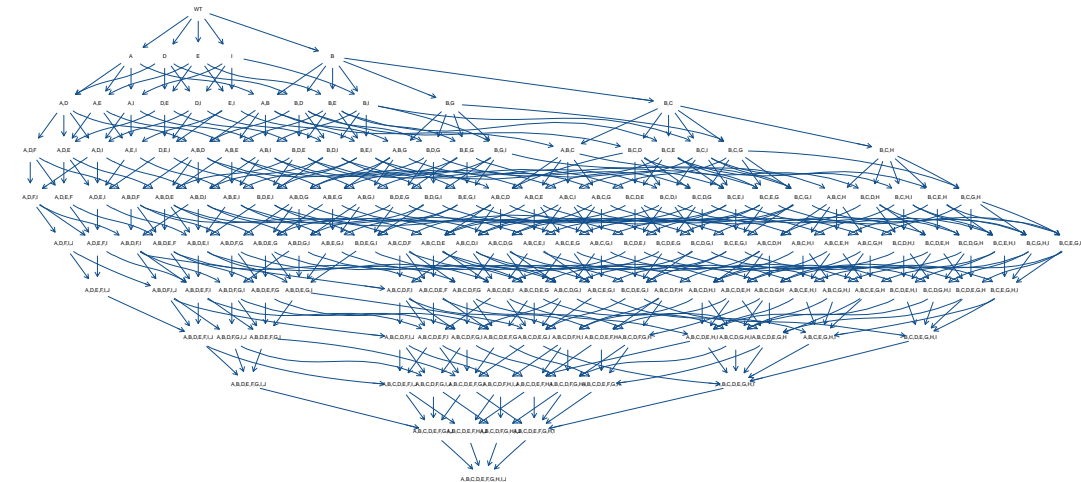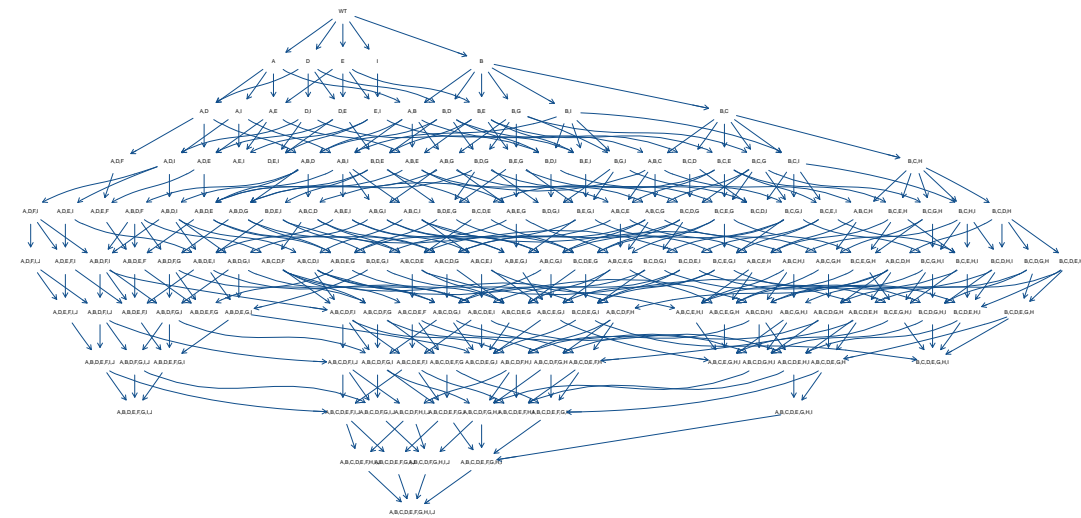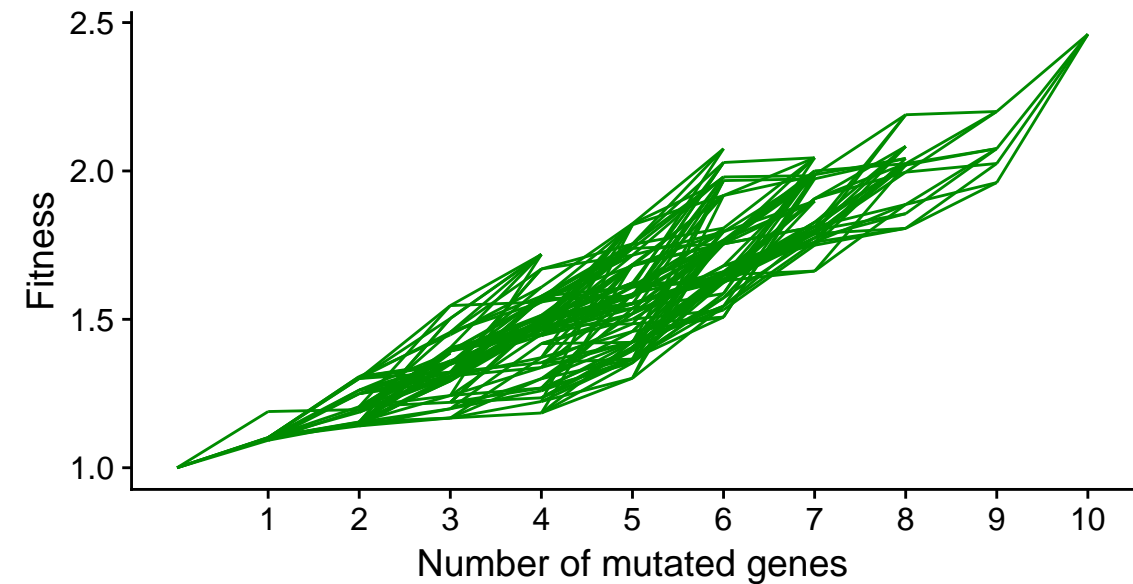

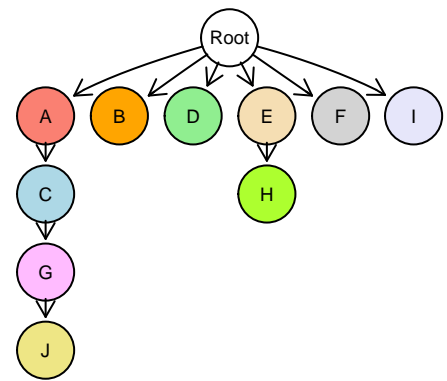

*ID* nTjCF9qeG8JYDoN8  
*acc genotypes* 240  
*peaks no back* 19  
*removed edges* 158  
*prop rem edges* 0.19

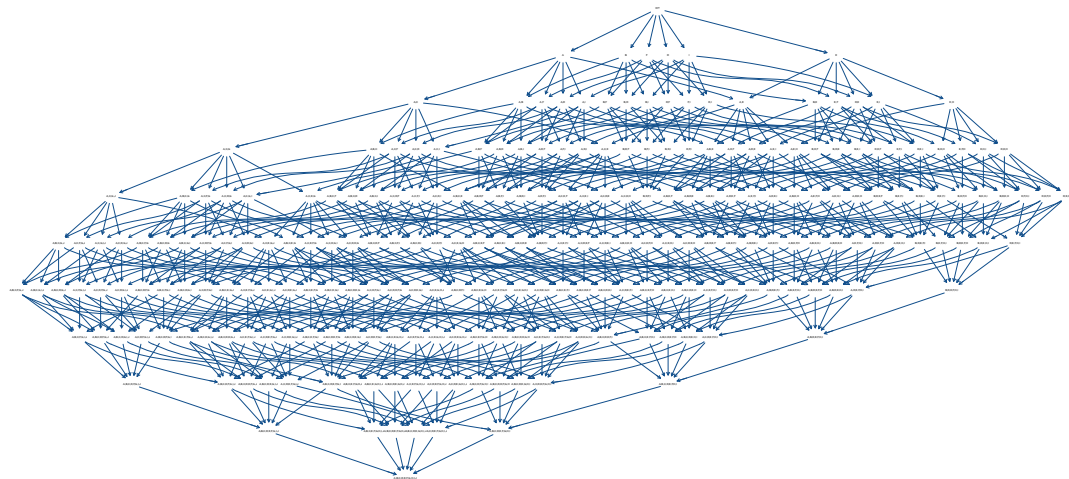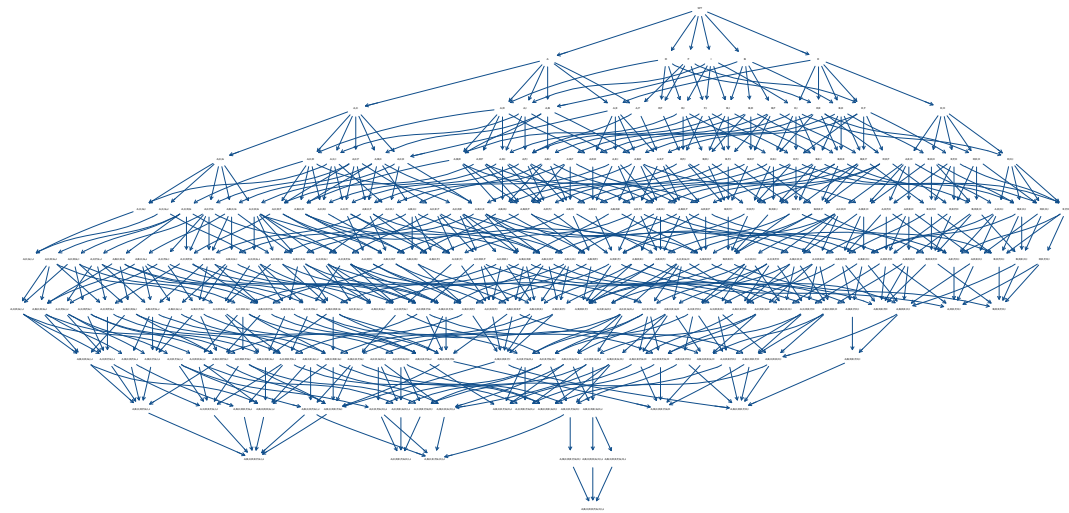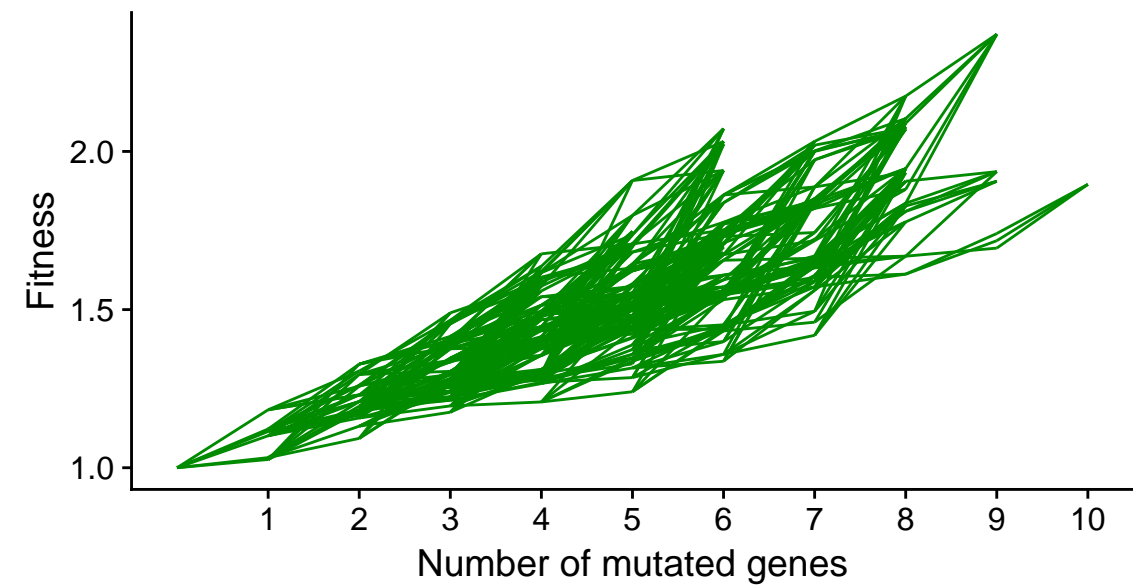

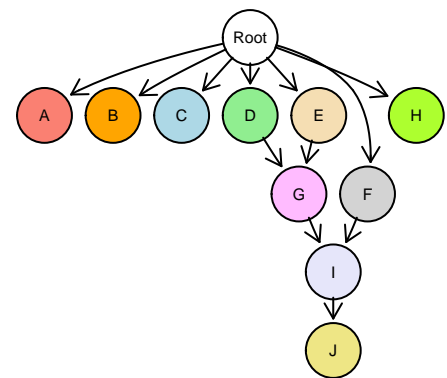

ID **nVi510c50JbnQRcl5**  
 acc genotypes **192**  
 peaks no back **17**  
 removed edges **126**  
 prop rem edges **0.192**

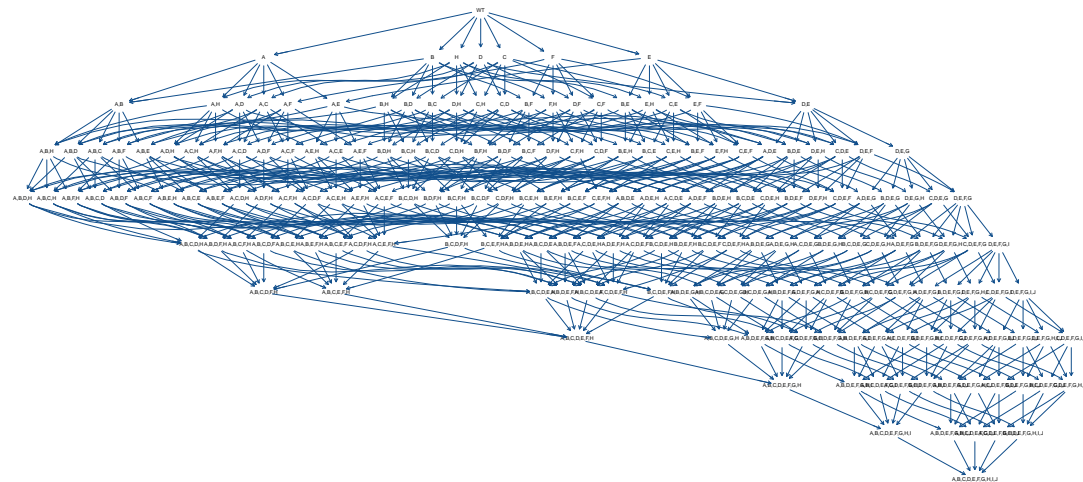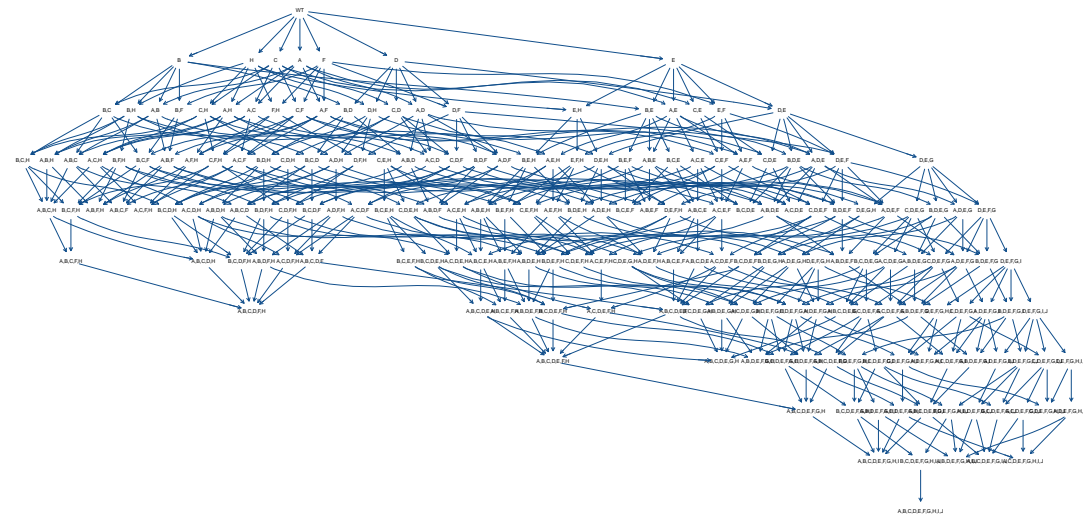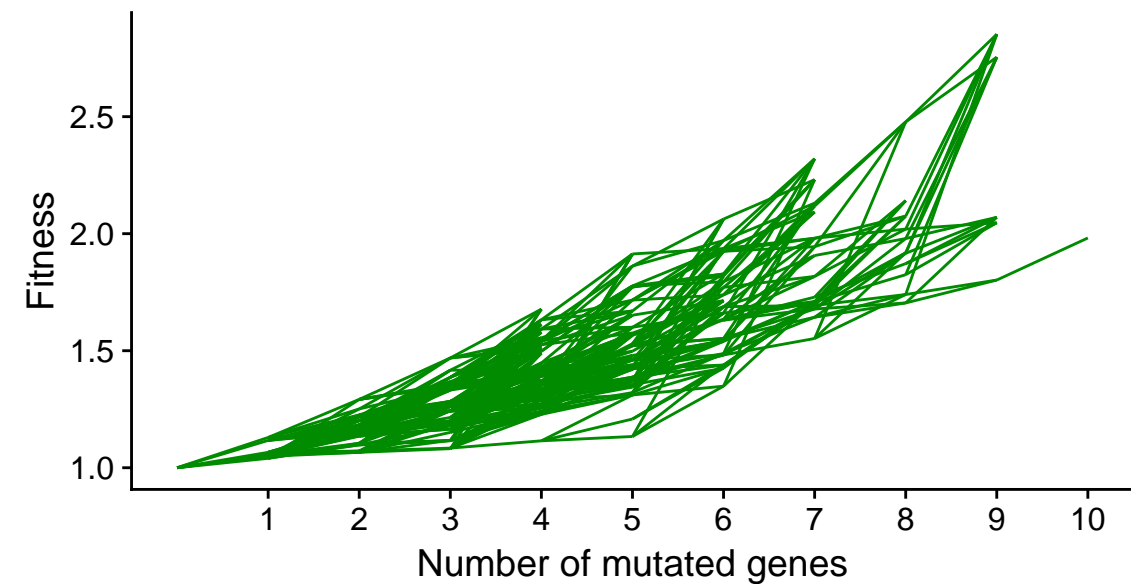

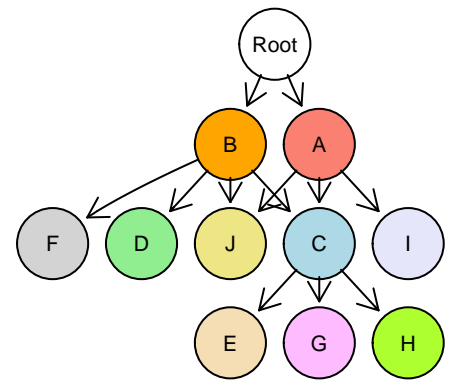

ID NXDMDVPfzyoQDyuP  
 acc genotypes 151  
 peaks no back 11  
 removed edges 90  
 prop rem edges 0.177

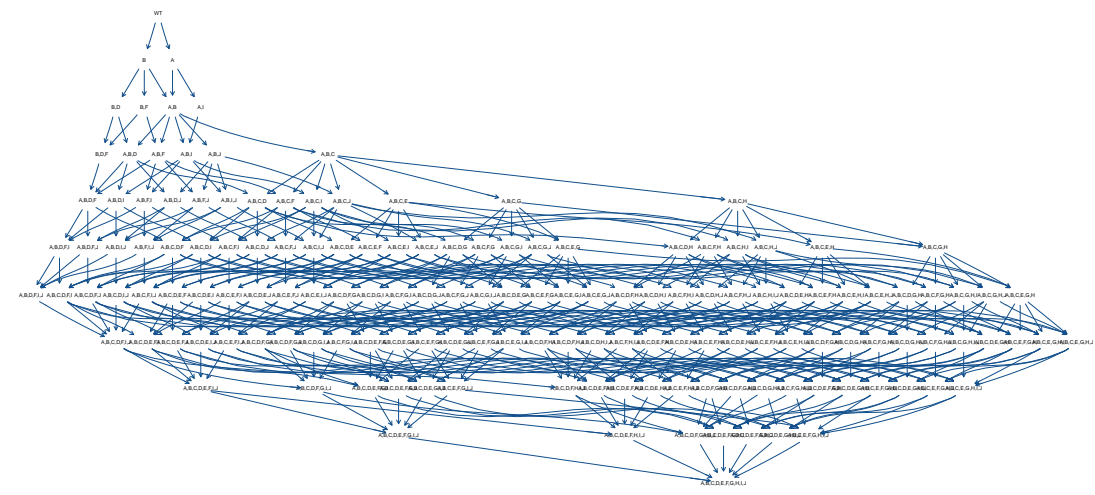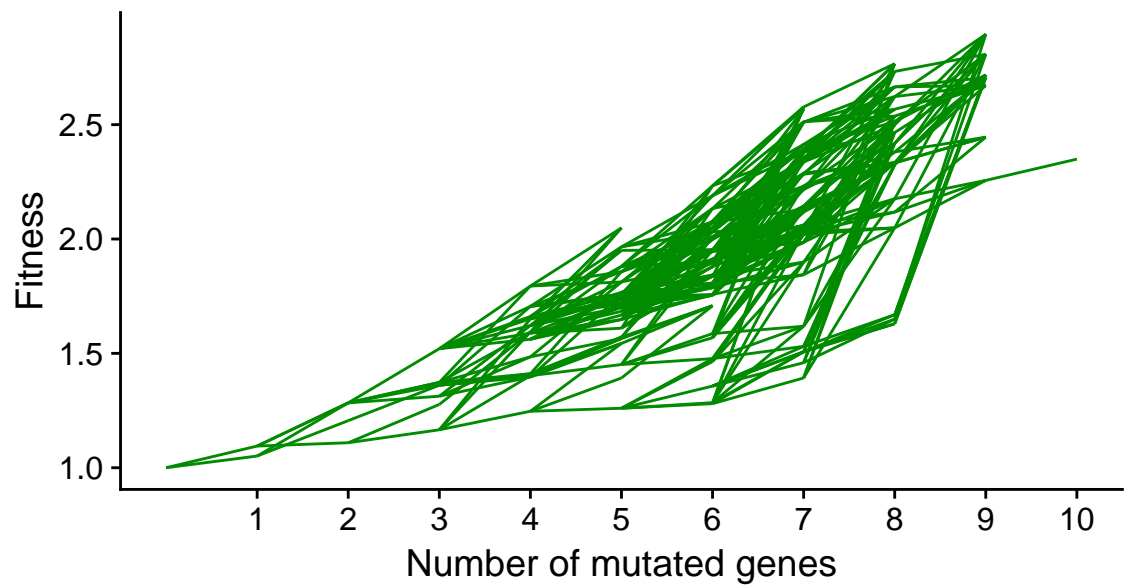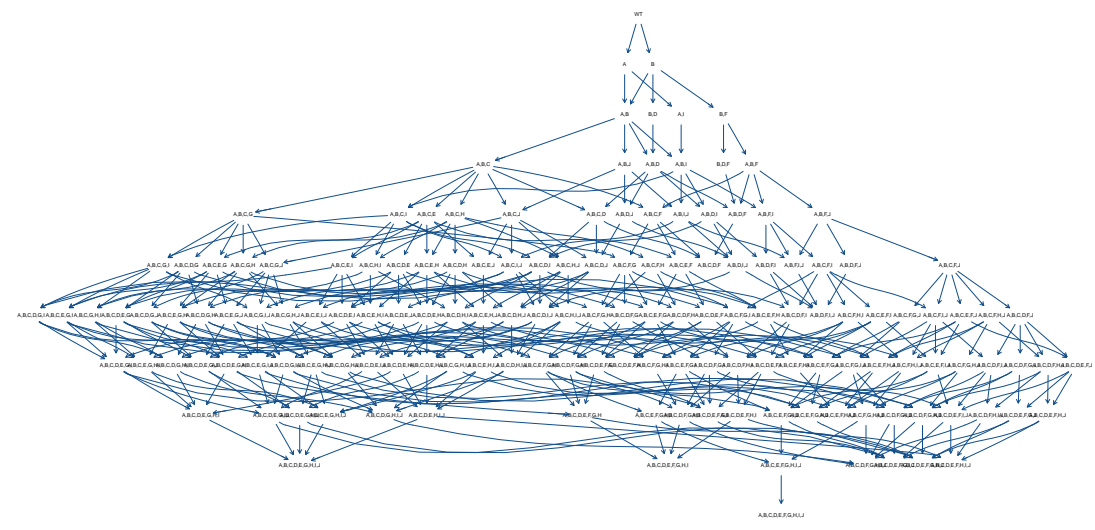

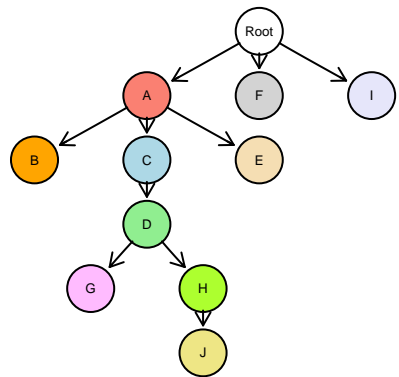

ID o8OvpWleTYvSAYxY  
 acc genotypes 132  
 peaks no back 13  
 removed edges 67  
 prop rem edges 0.164

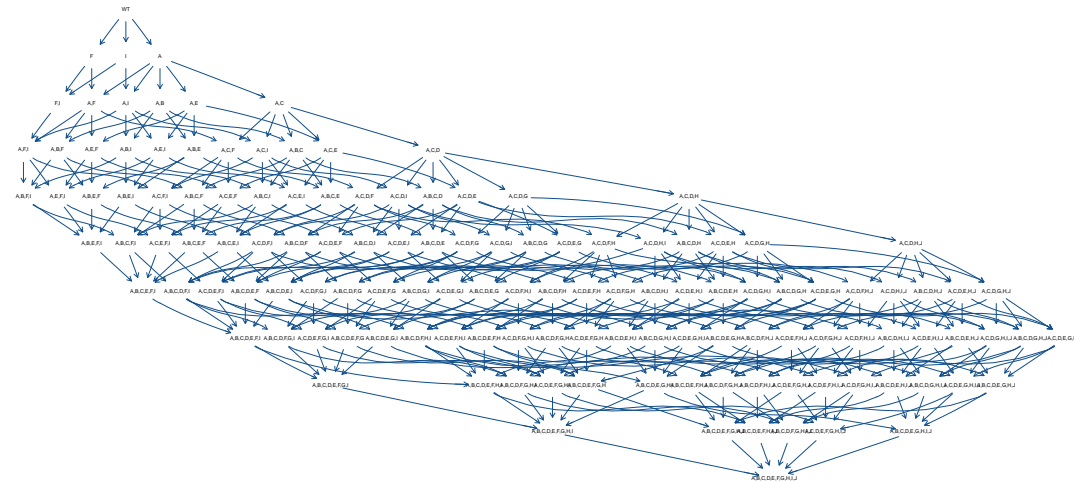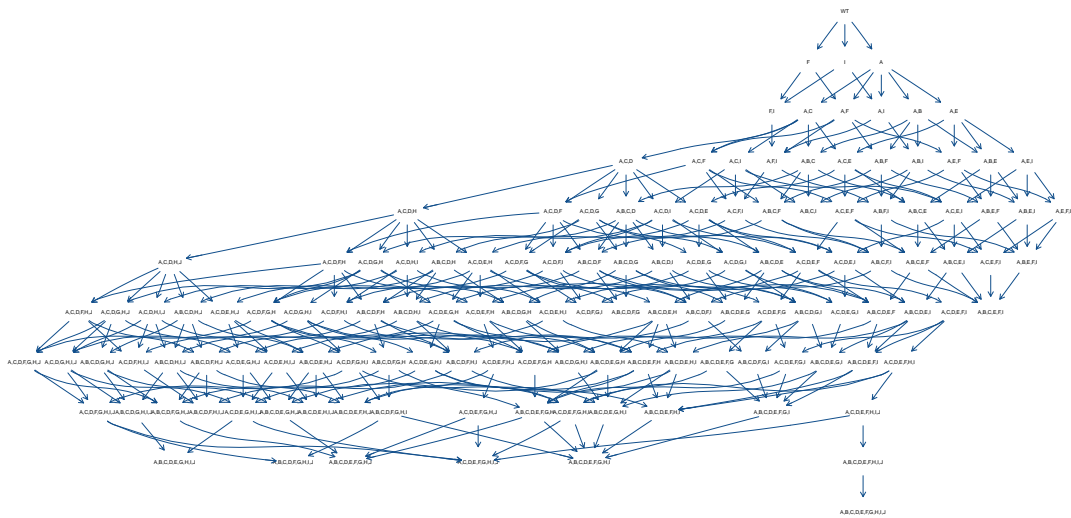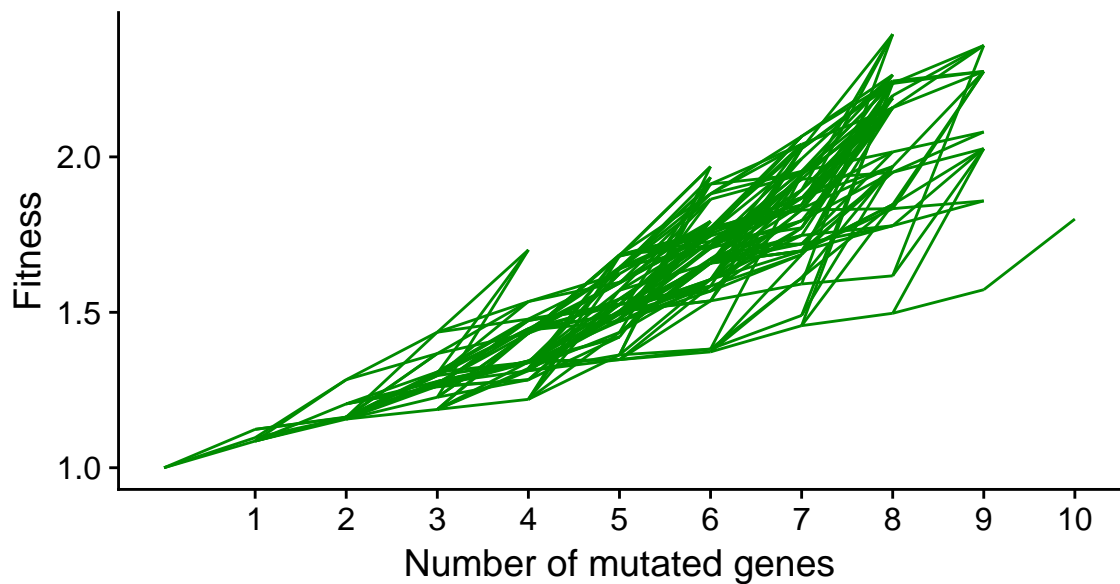

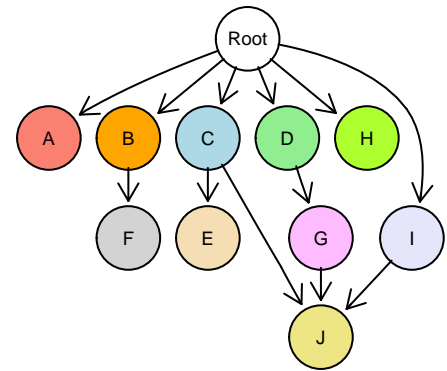

*ID* ochEhkNsBx3ftyMD  
*acc genotypes* 240  
*peaks no back* 19  
*removed edges* 173  
*prop rem edges* 0.208

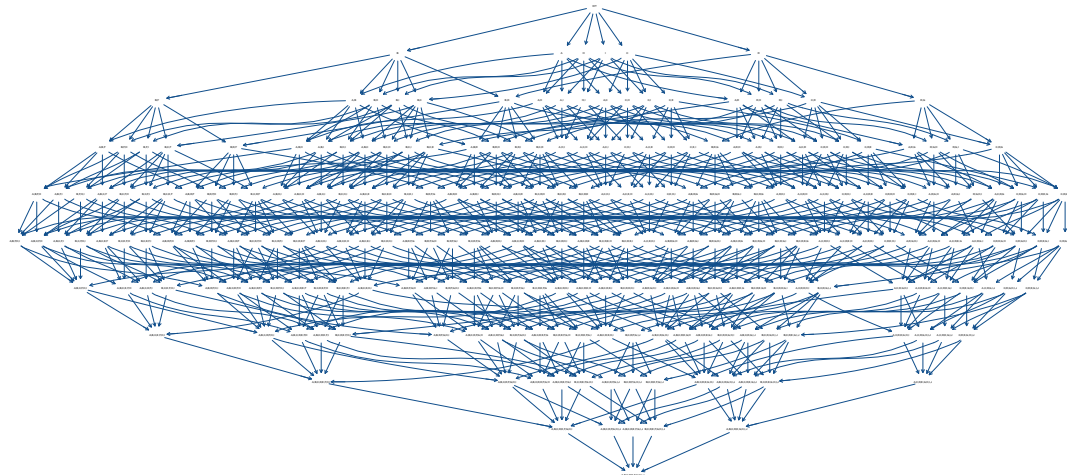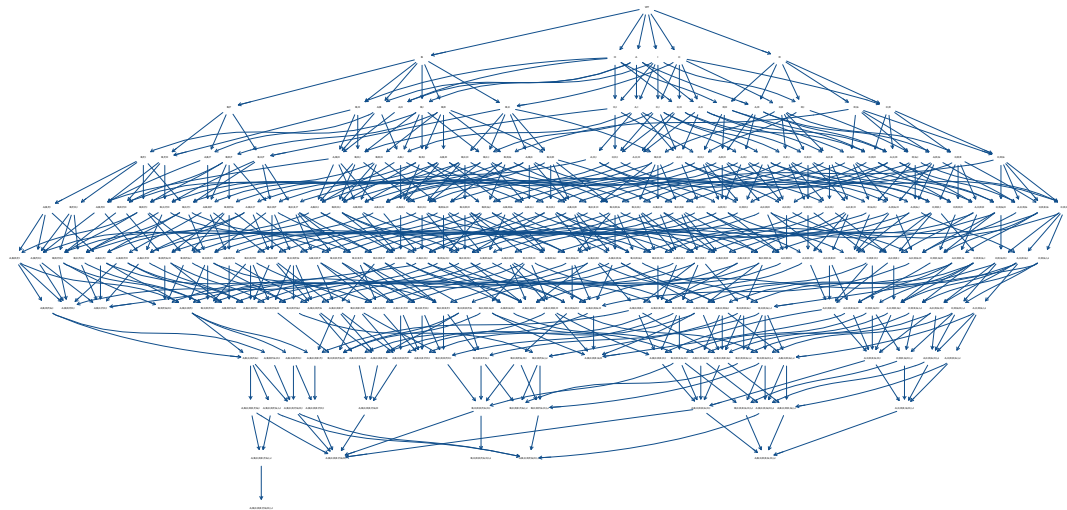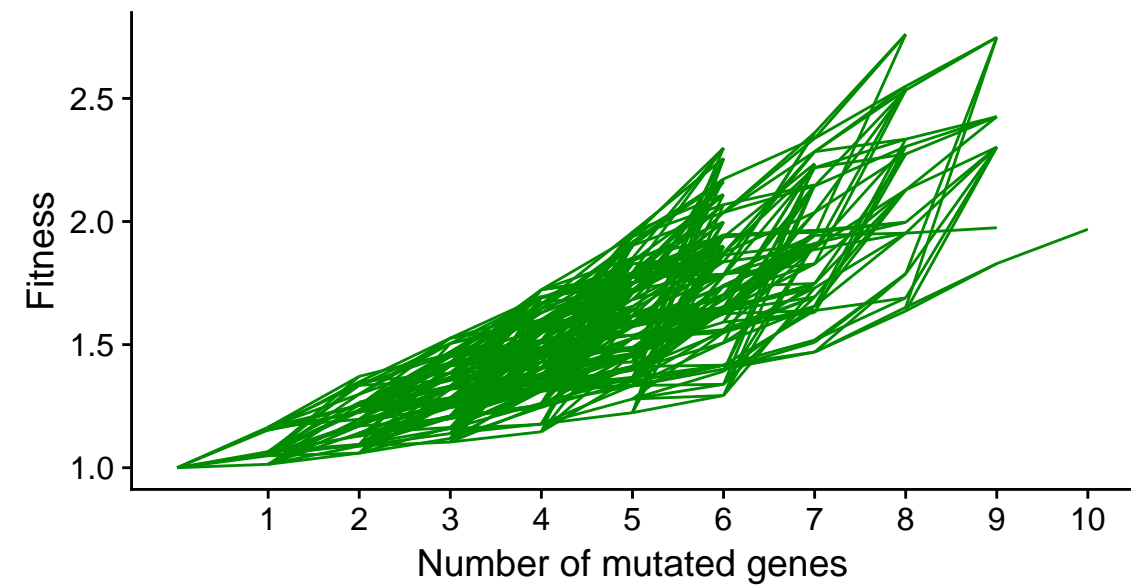



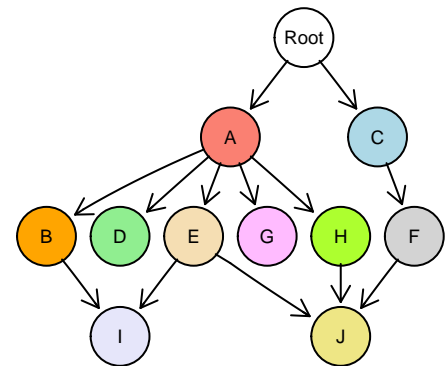

ID **OCRTvAy6n6Rv7KAn**  
 acc genotypes **135**  
 peaks no back **11**  
 removed edges **80**  
 prop rem edges **0.192**

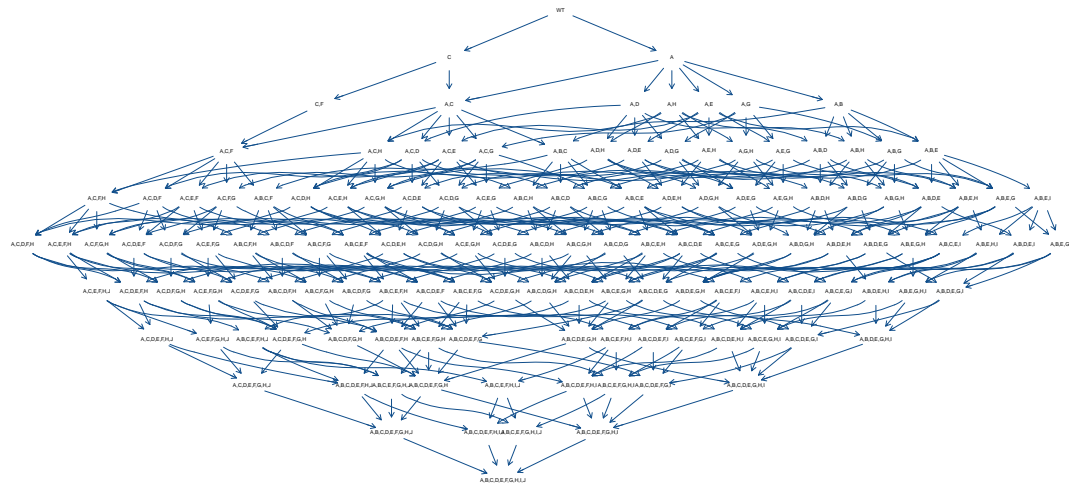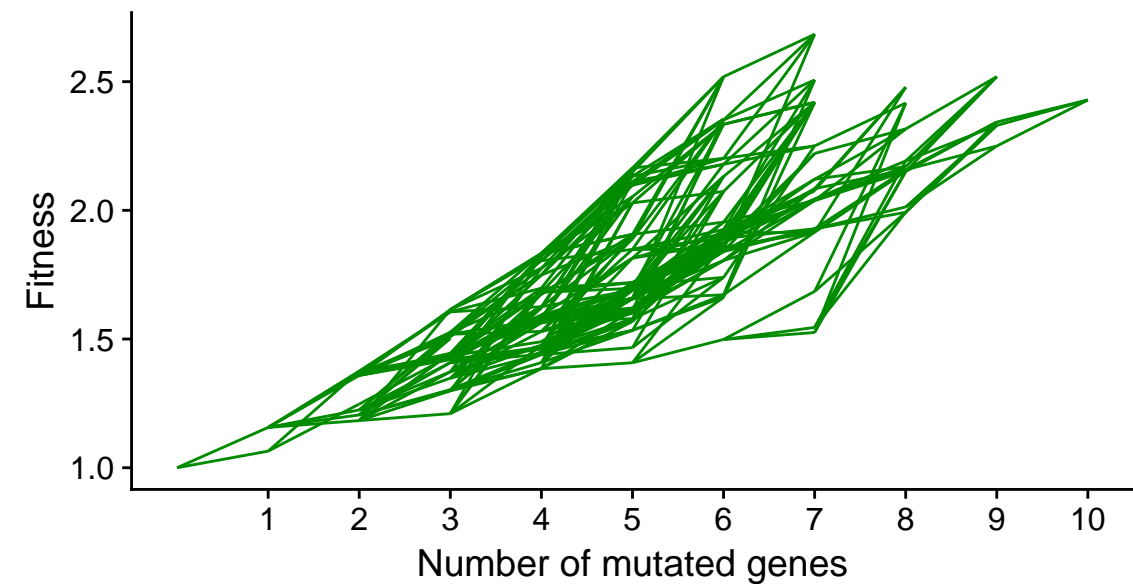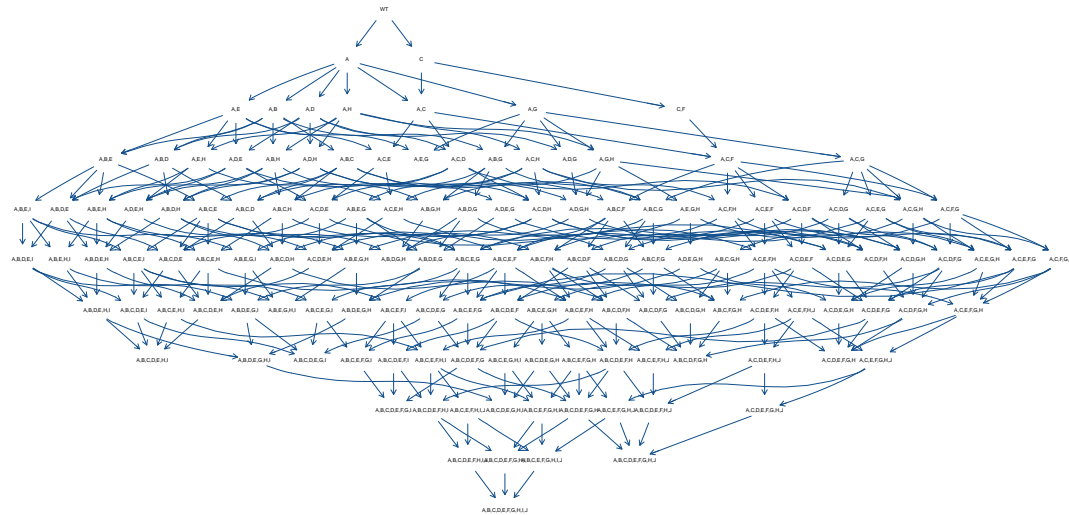

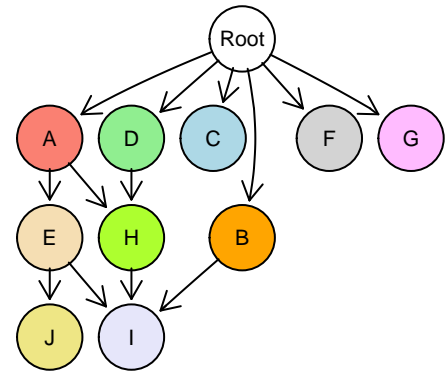

ID **Oo5hmM8b710XcCc1x**  
 acc genotypes **192**  
 peaks no back **15**  
 removed edges **118**  
 prop rem edges **0.184**

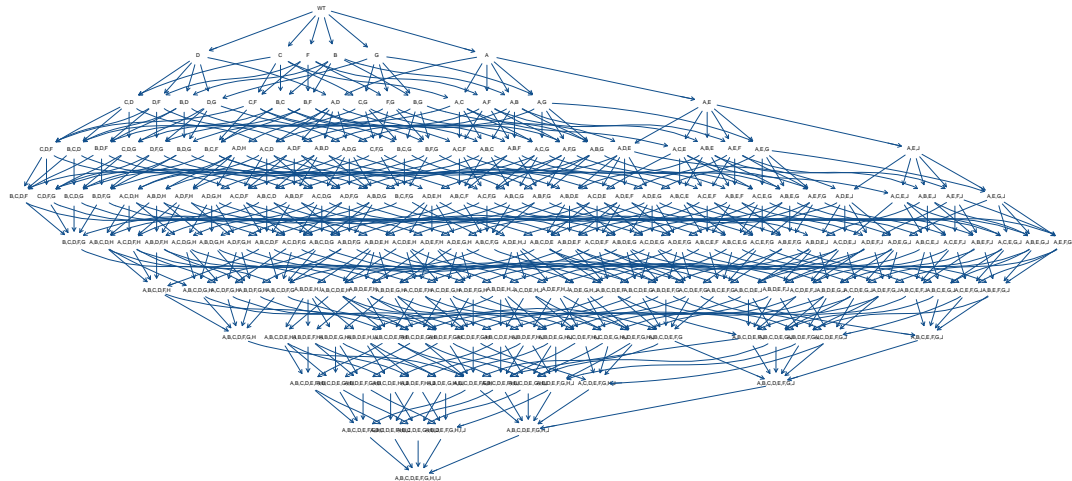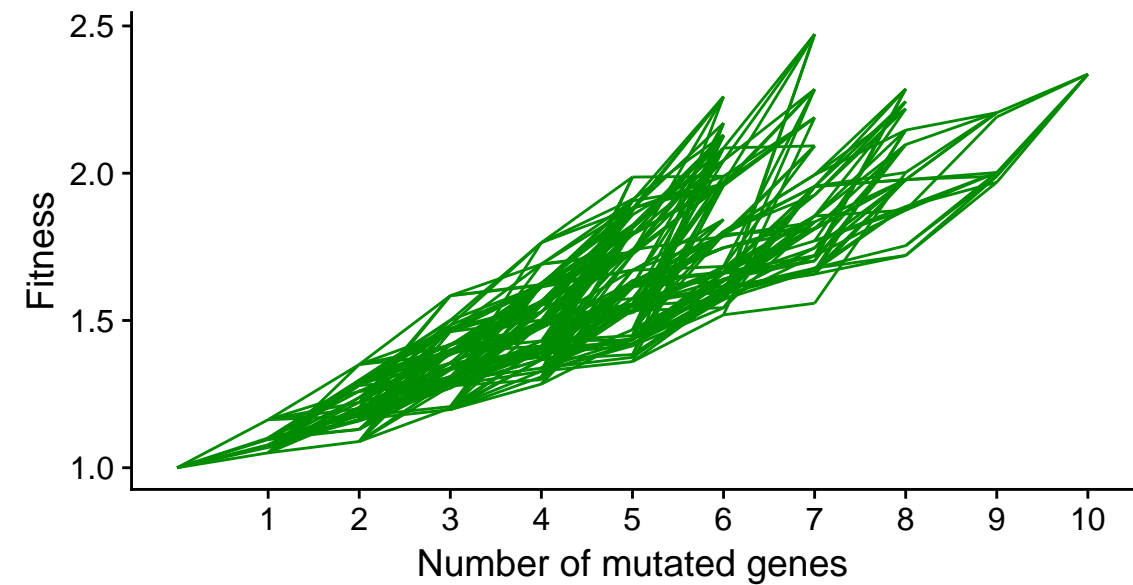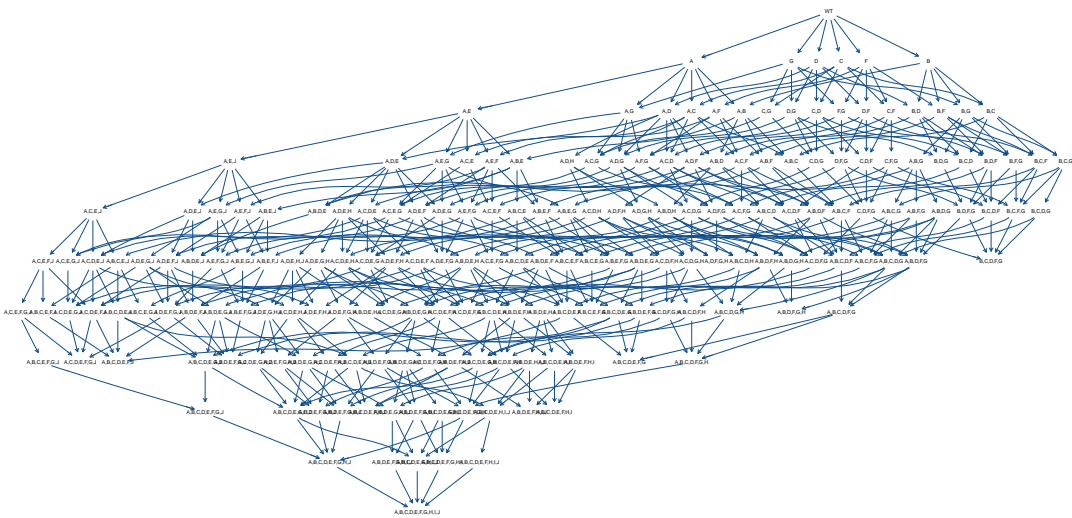

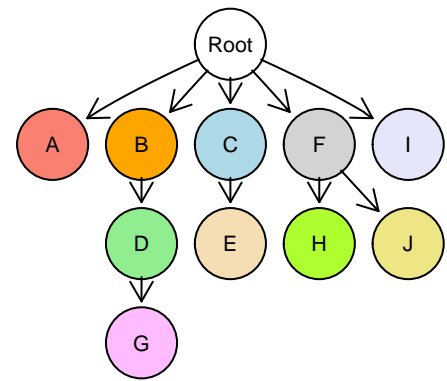

*ID* OrLY4wrCbAM10e8mH  
*acc genotypes* 240  
*peaks no back* 16  
*removed edges* 141  
*prop rem edges* 0.172

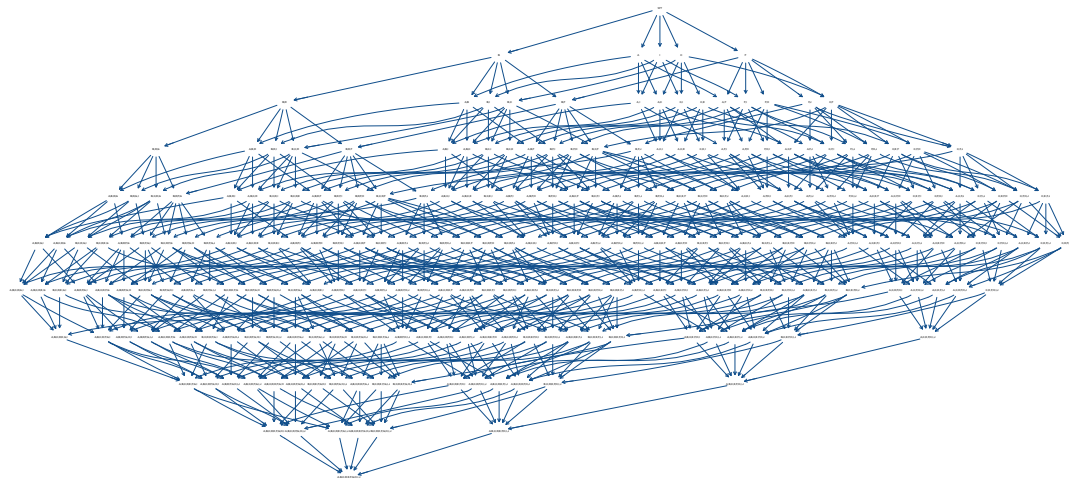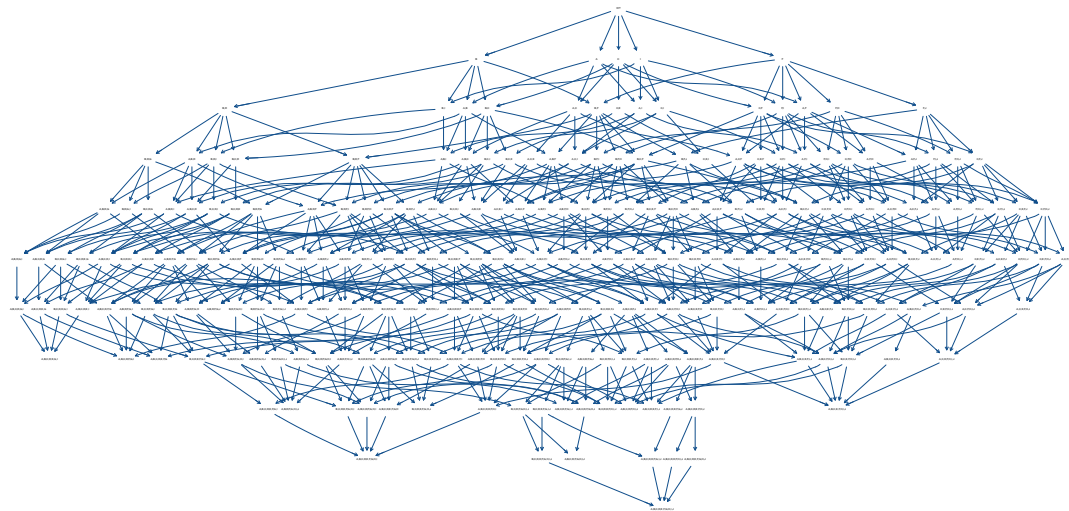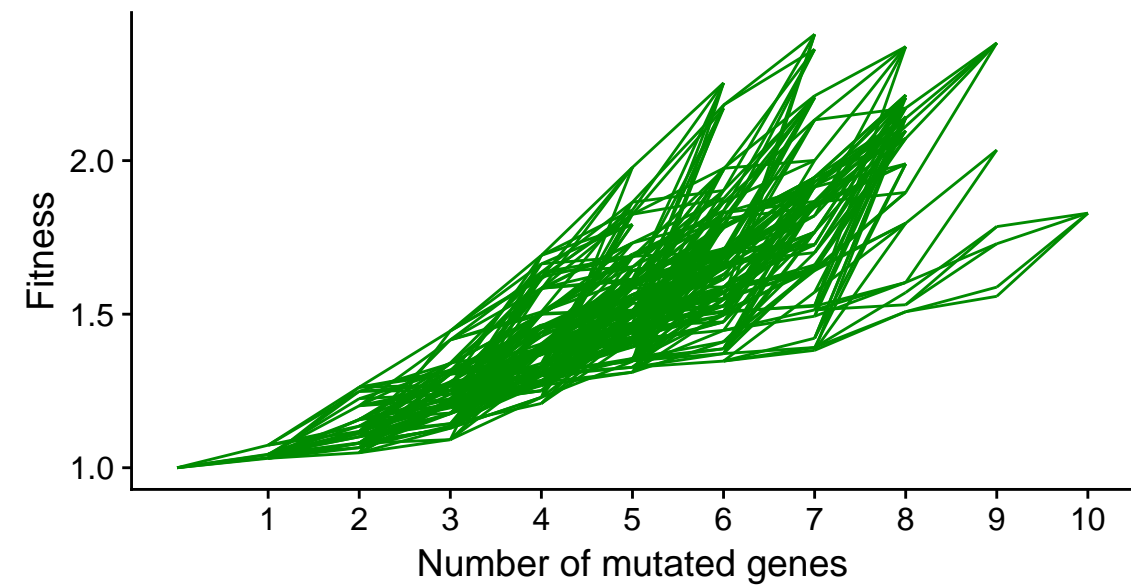

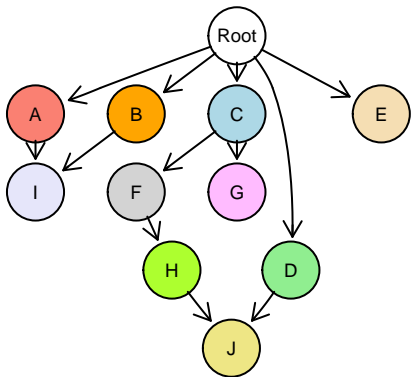

*ID* OSil7blkeOUdWfpZ  
*acc genotypes* 160  
*peaks no back* 16  
*removed edges* 100  
*prop rem edges* 0.2

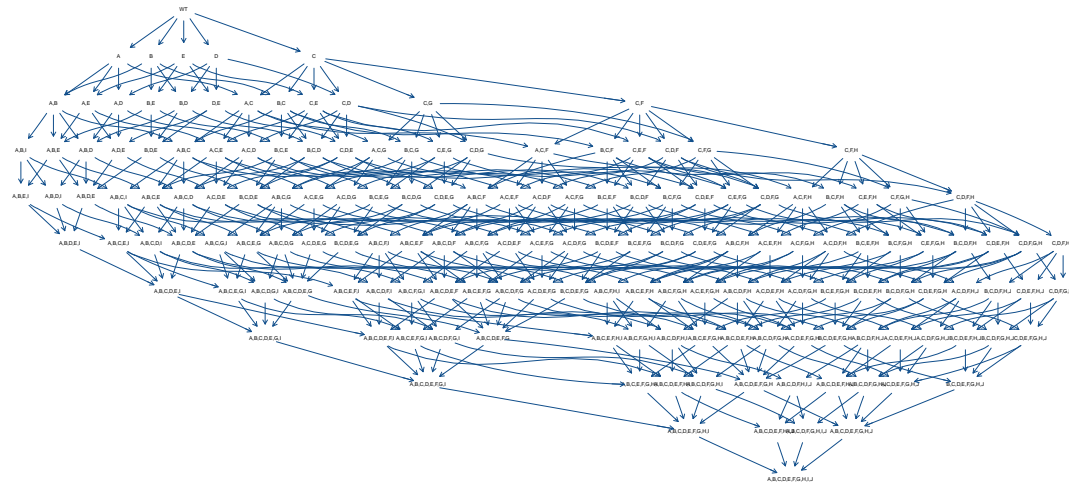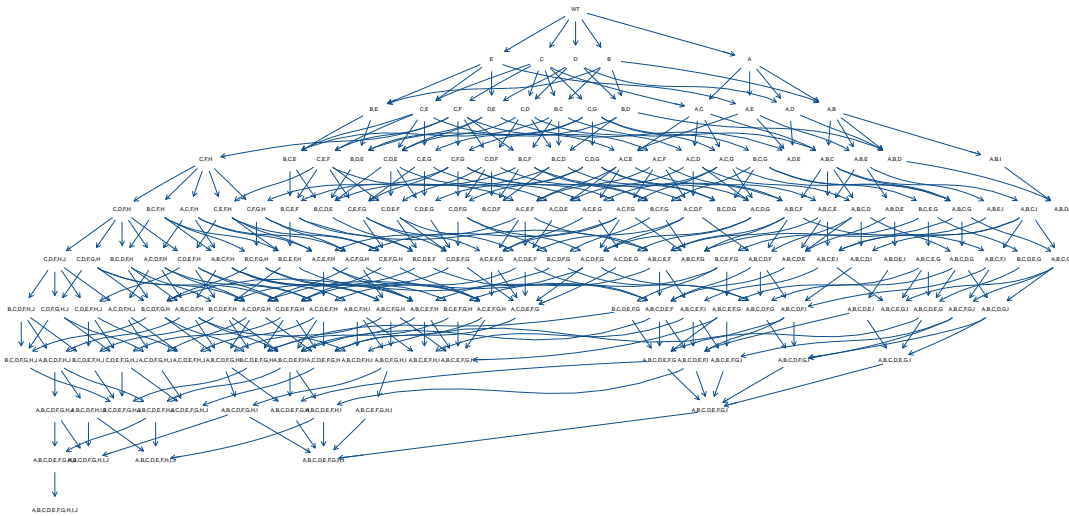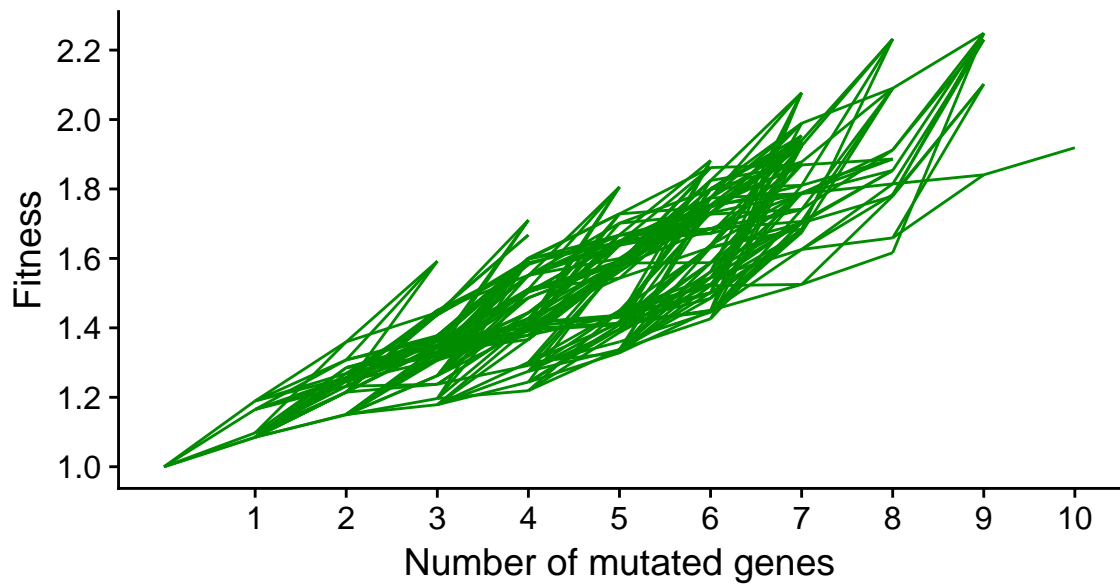

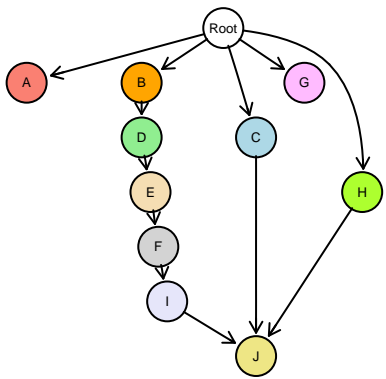

ID OXbm8SnMAxb9VCsc  
 acc genotypes 100  
 peaks no back 10  
 removed edges 49  
 prop rem edges 0.175

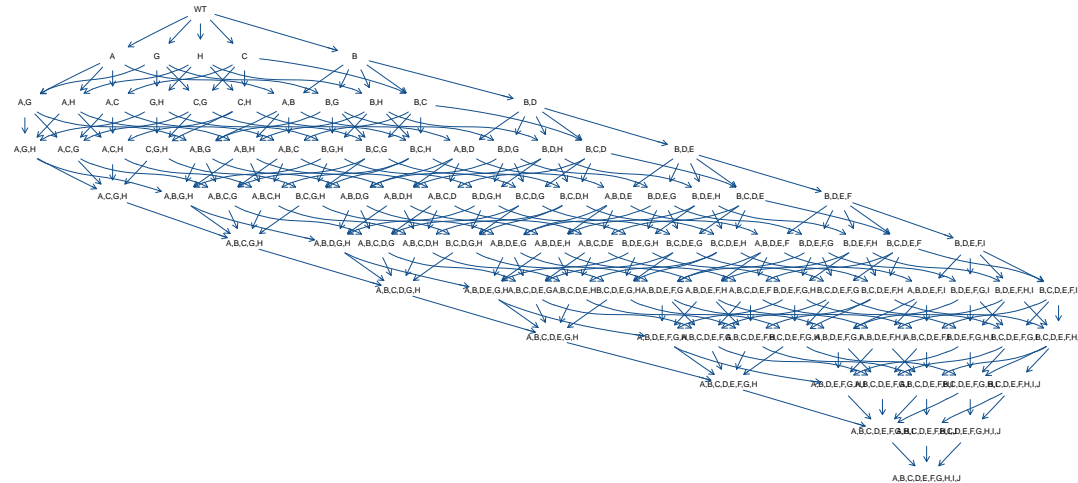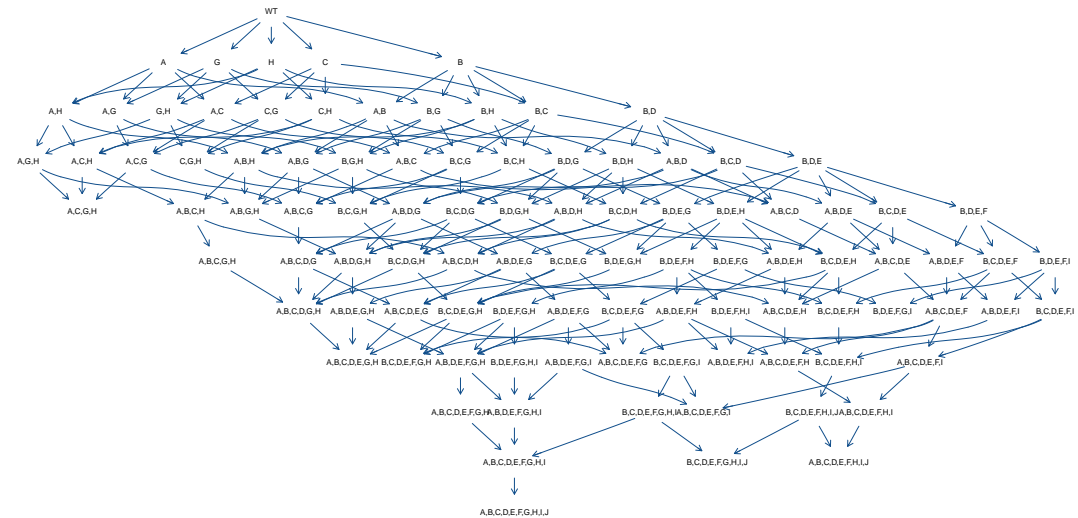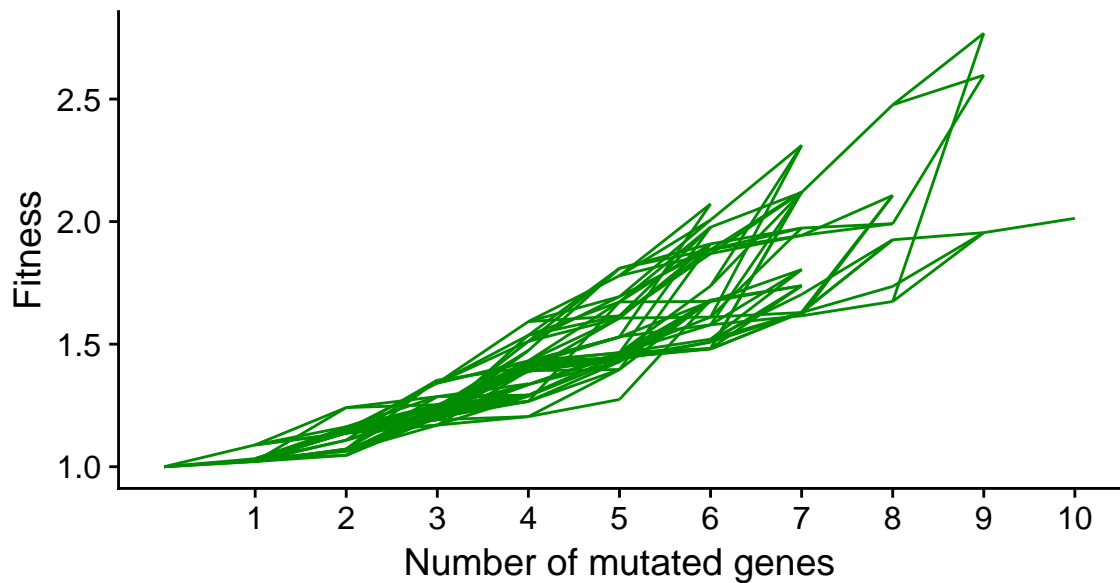

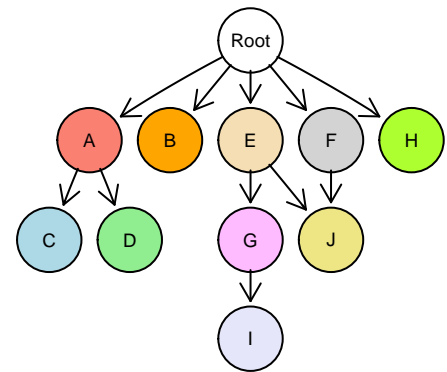

*ID* PG8DkzMLvLzGnrF10  
*acc genotypes* 220  
*peaks no back* 18  
*removed edges* 161  
*prop rem edges* 0.218

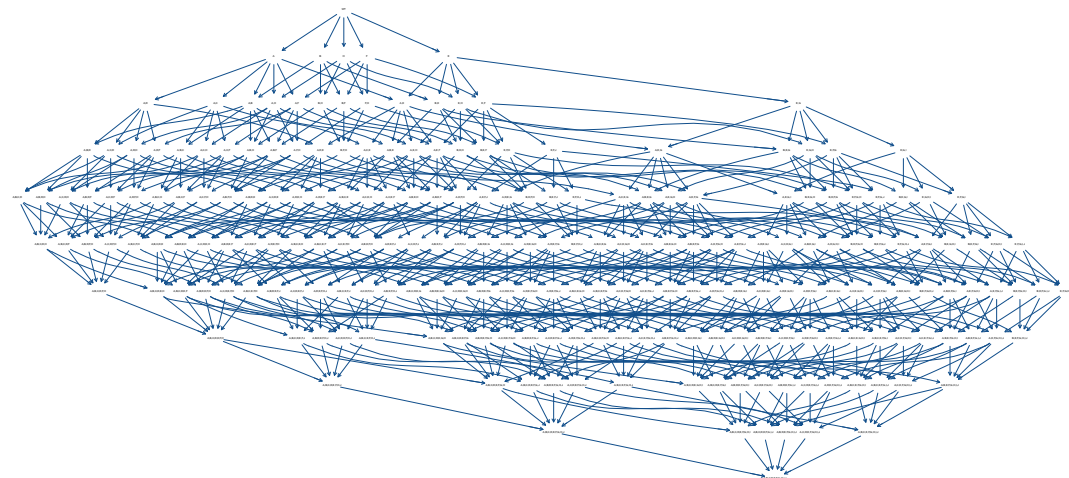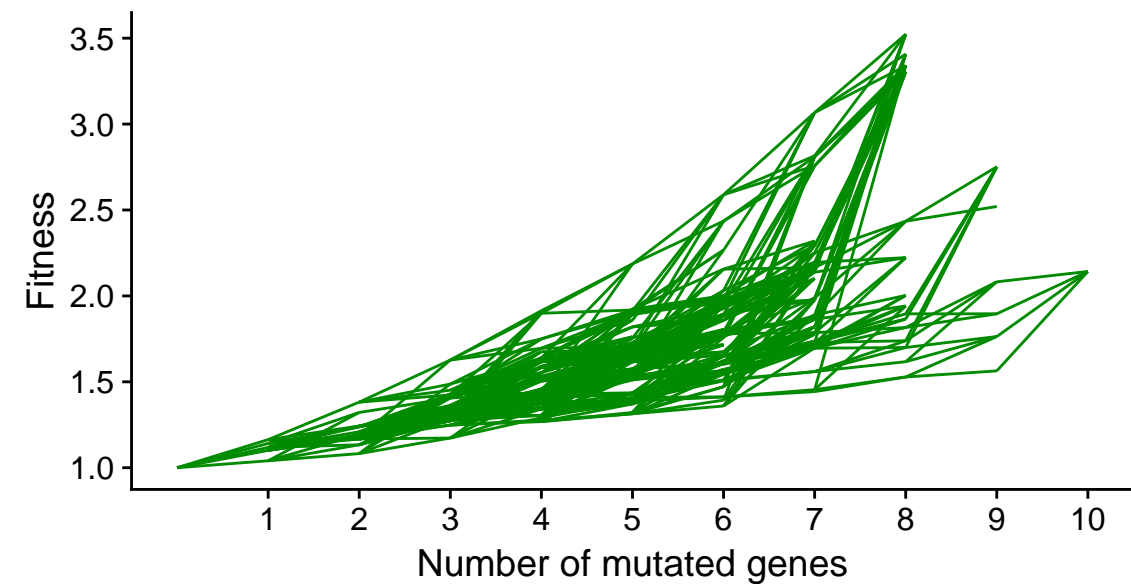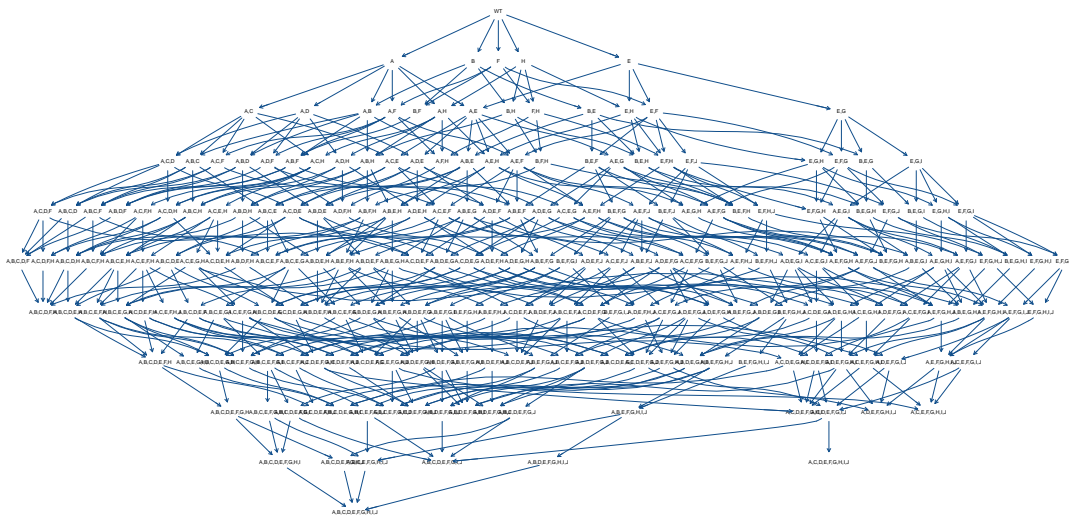

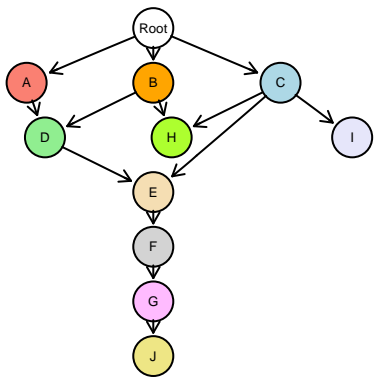

ID [pLto5Tz84T9OOoht](#)  
 acc genotypes 37  
 peaks no back 6  
 removed edges 13  
 prop rem edges 0.186

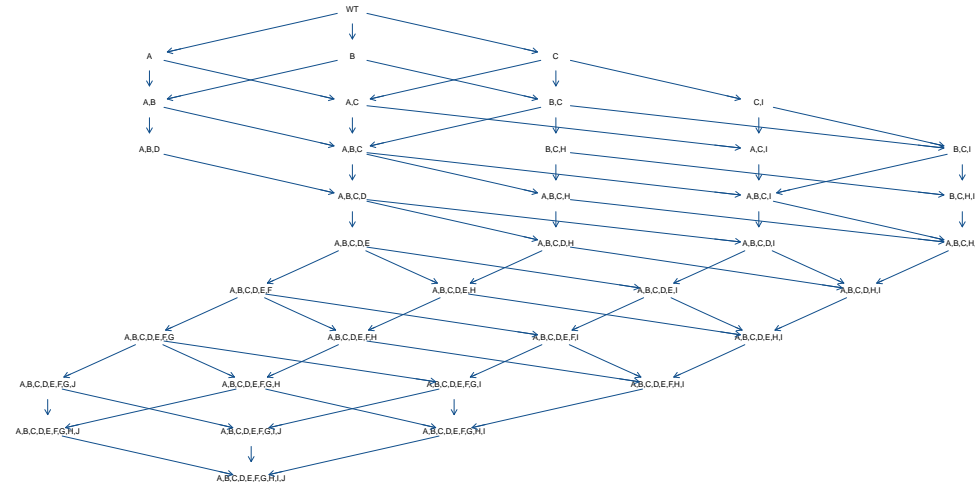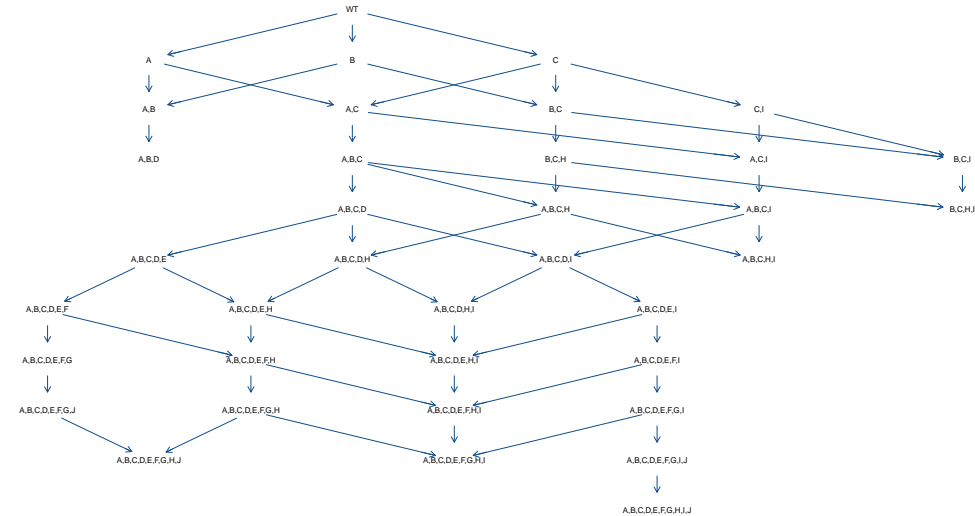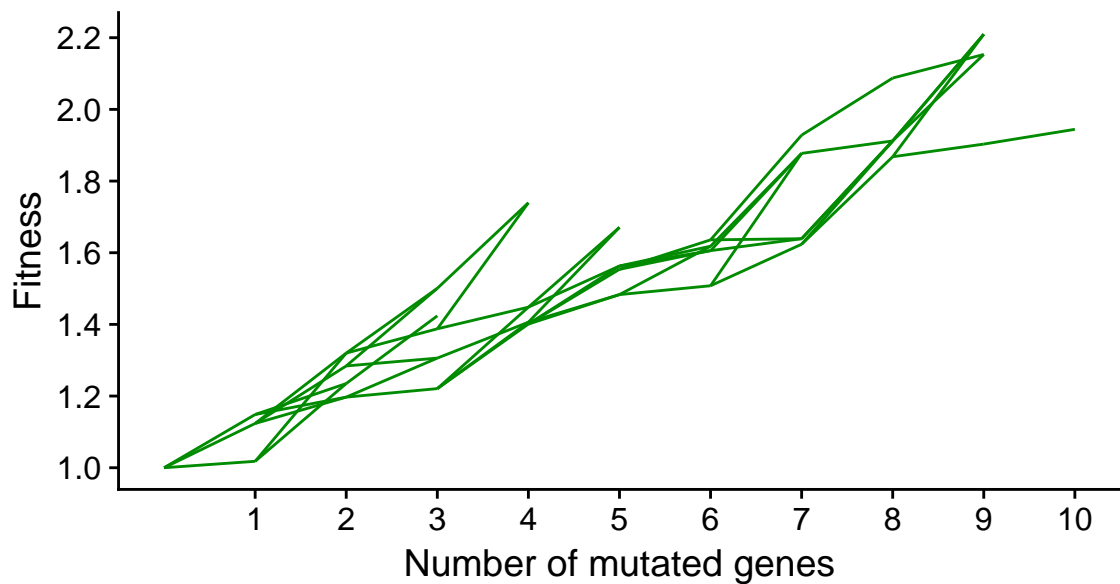

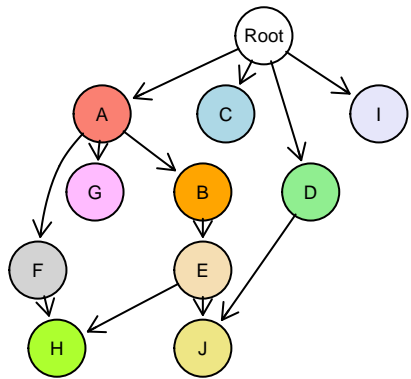

ID **PNEwdgl2i1dRkK3p**  
 acc genotypes **144**  
 peaks no back **15**  
 removed edges **87**  
 prop rem edges **0.194**

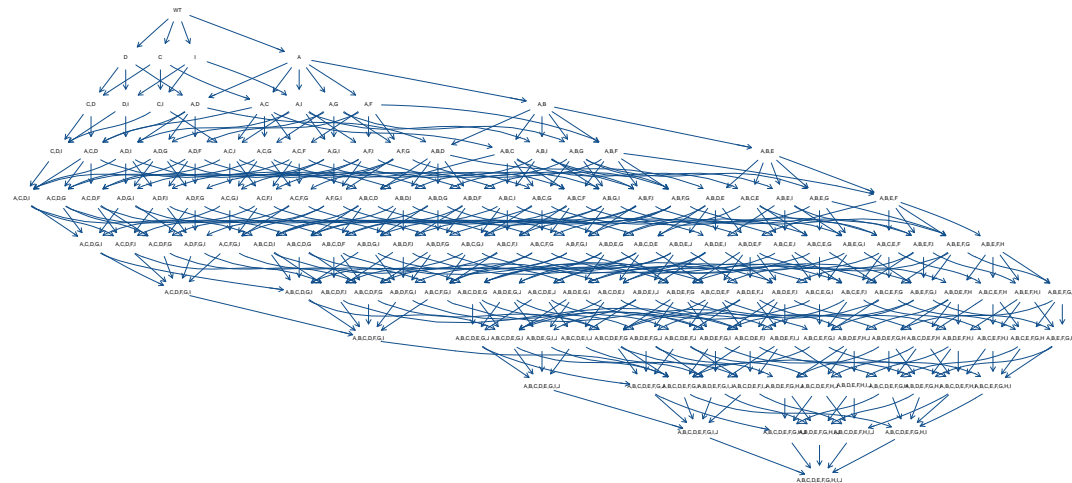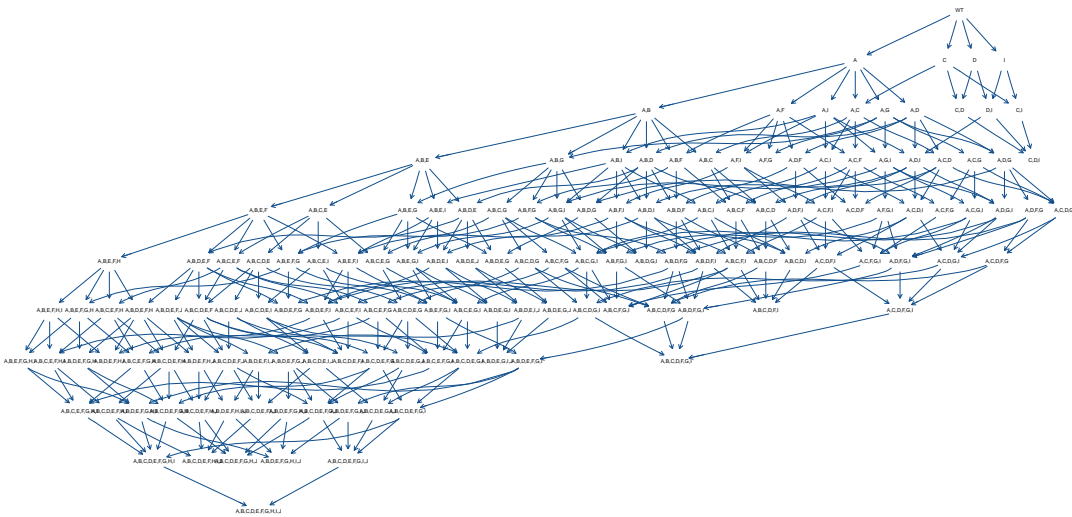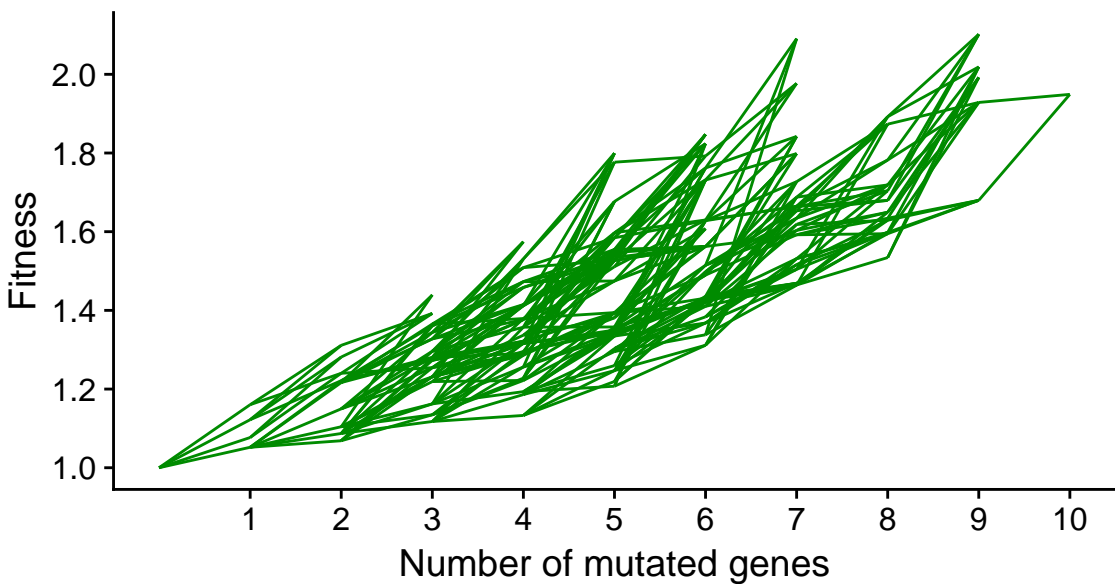



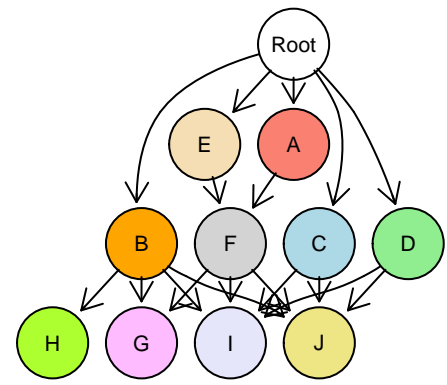

ID PpAWVK9tbBJENITR  
 acc genotypes 80  
 peaks no back 12  
 removed edges 43  
 prop rem edges 0.207

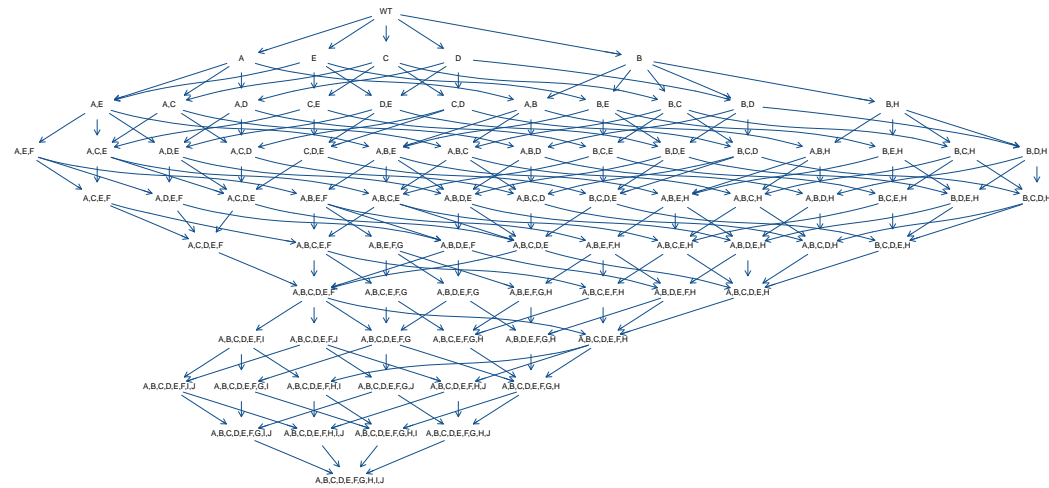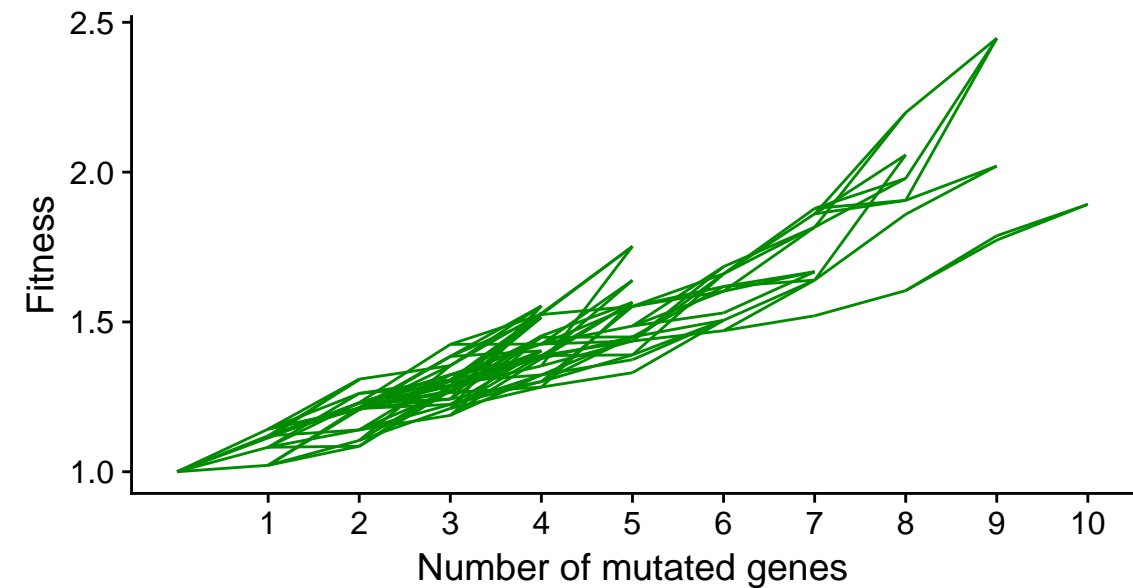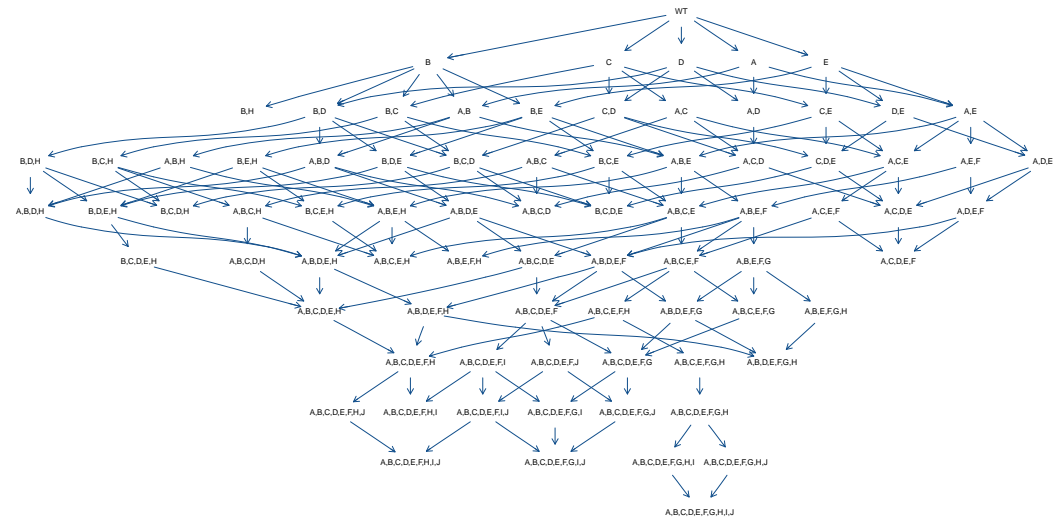

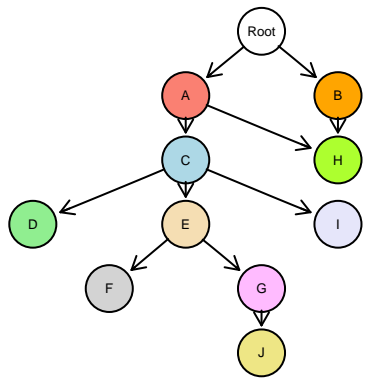

ID Pqr5tjYF1SZIZUV10  
 acc genotypes 89  
 peaks no back 9  
 removed edges 46  
 prop rem edges 0.189

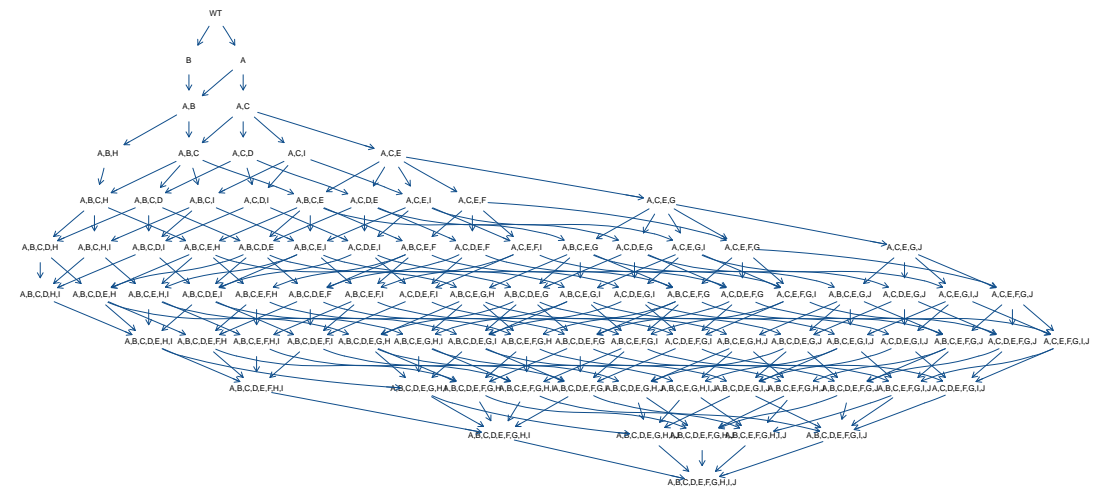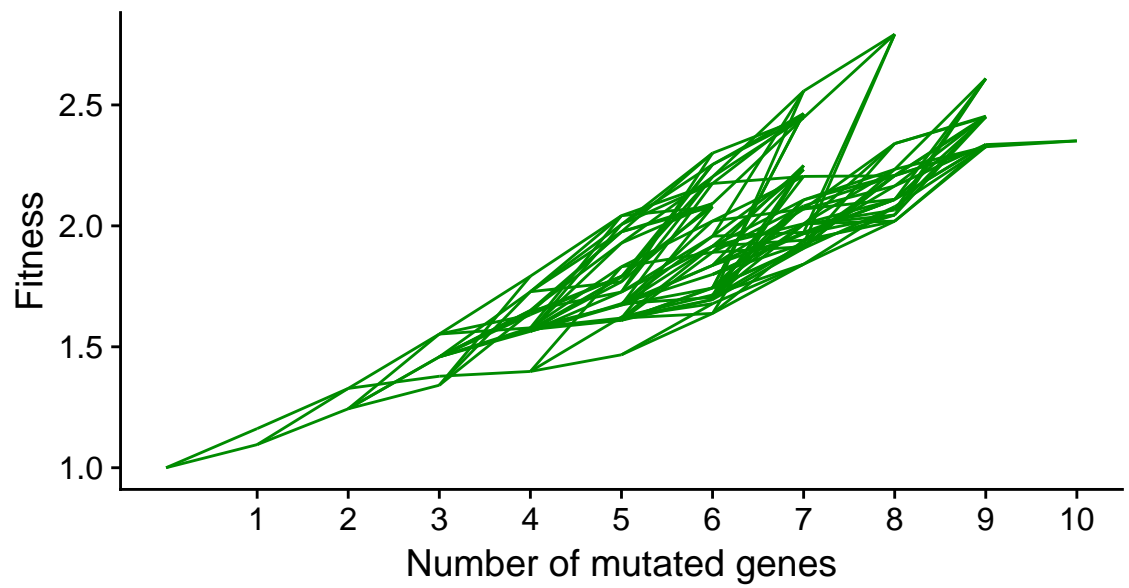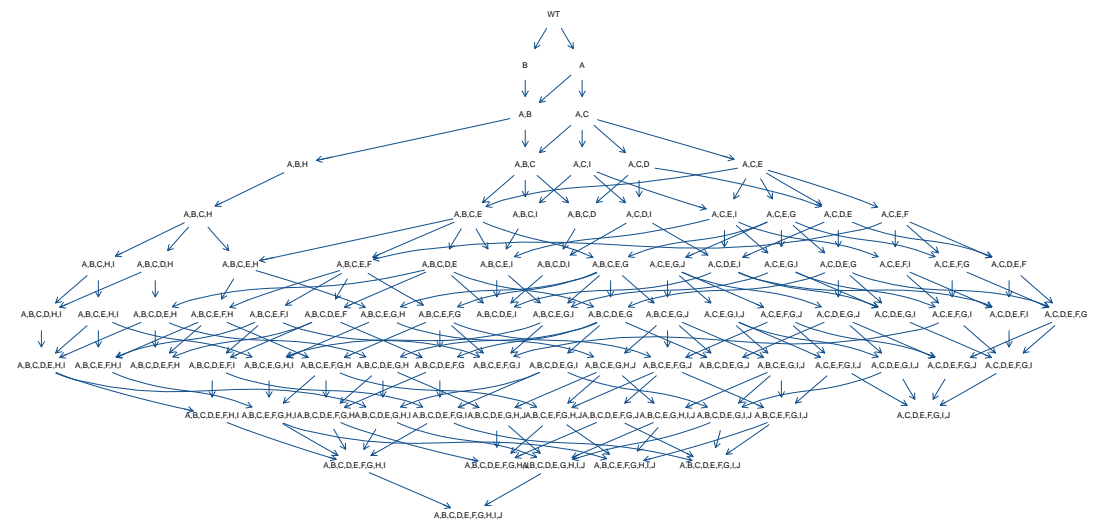

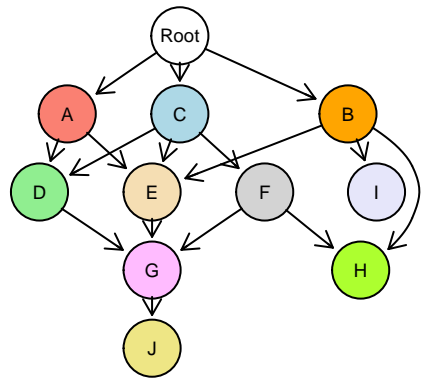

ID **q4xh5ljukplhq9H9**  
 acc genotypes **50**  
 peaks no back **7**  
 removed edges **20**  
 prop rem edges **0.187**

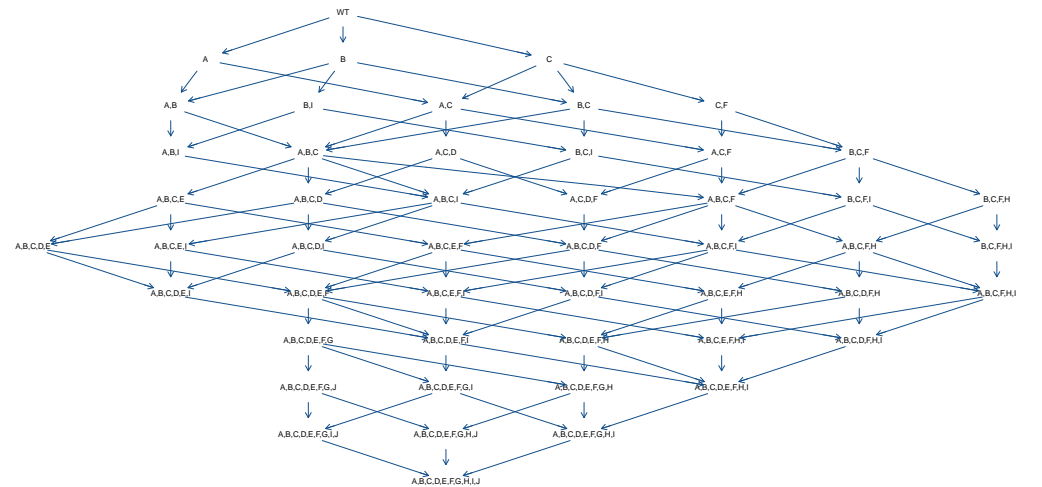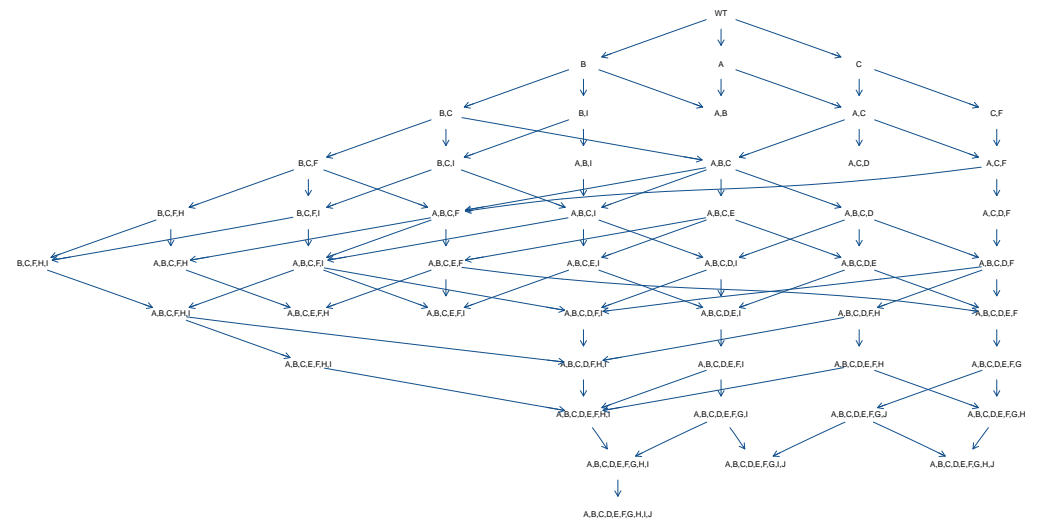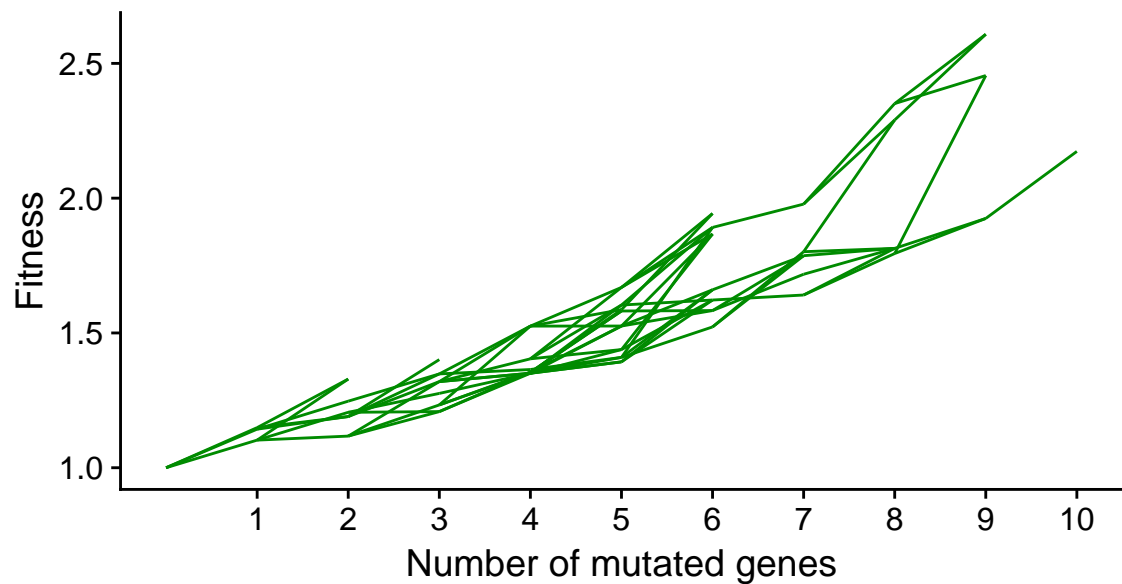

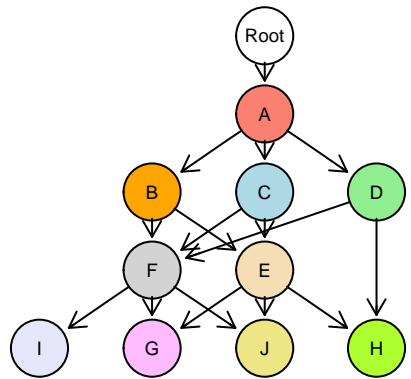

ID q7yEvxoMttQHd9KY  
 acc genotypes 30  
 peaks no back 7  
 removed edges 10  
 prop rem edges 0.182

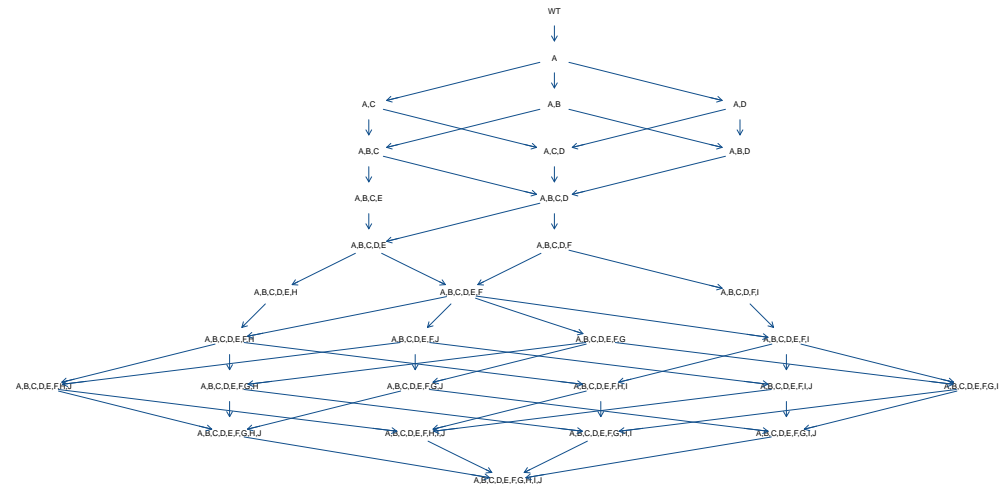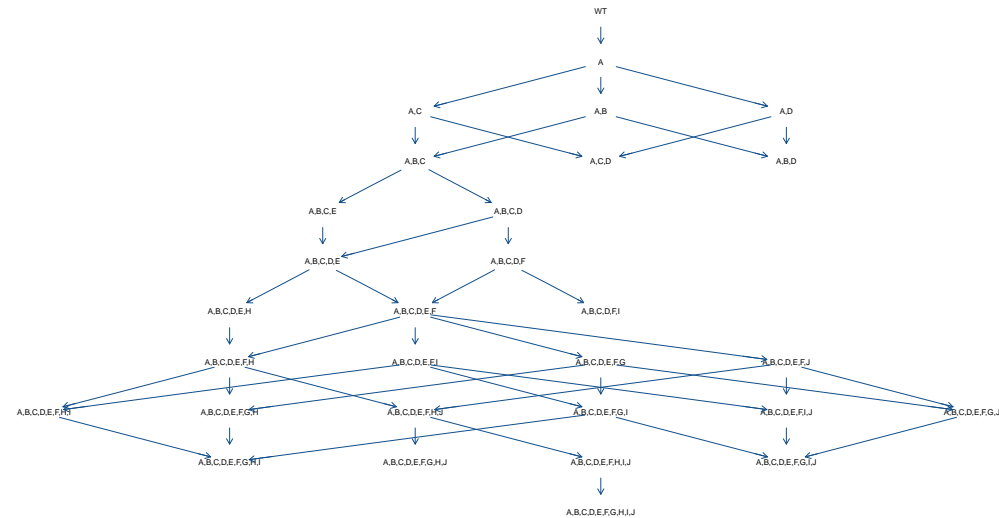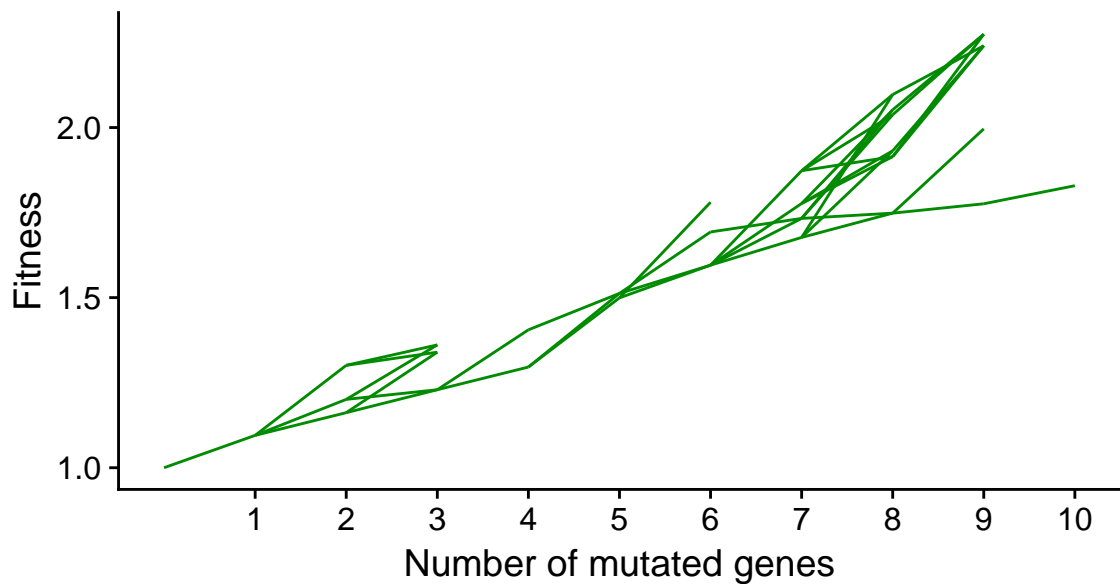

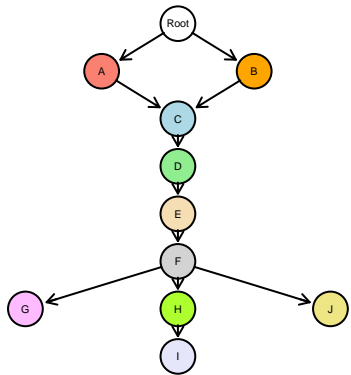

ID **qA5UjjBYFJWi5Ddc**  
 acc genotypes **19**  
 peaks no back **3**  
 removed edges **2**  
 prop rem edges **0.071**

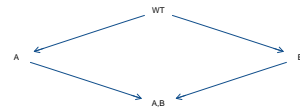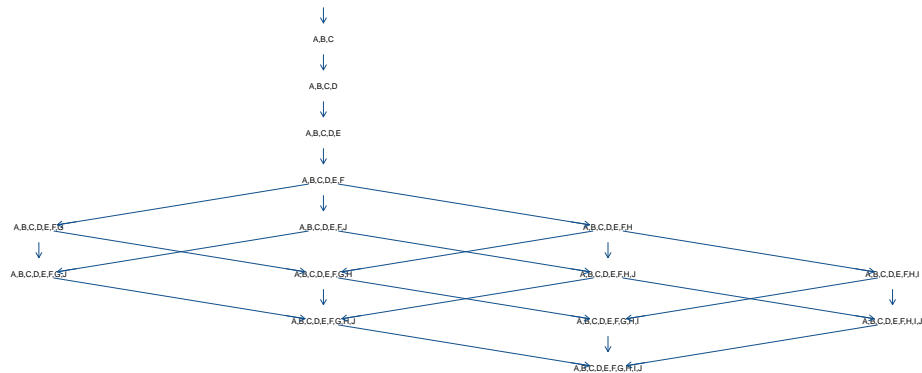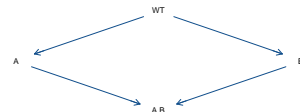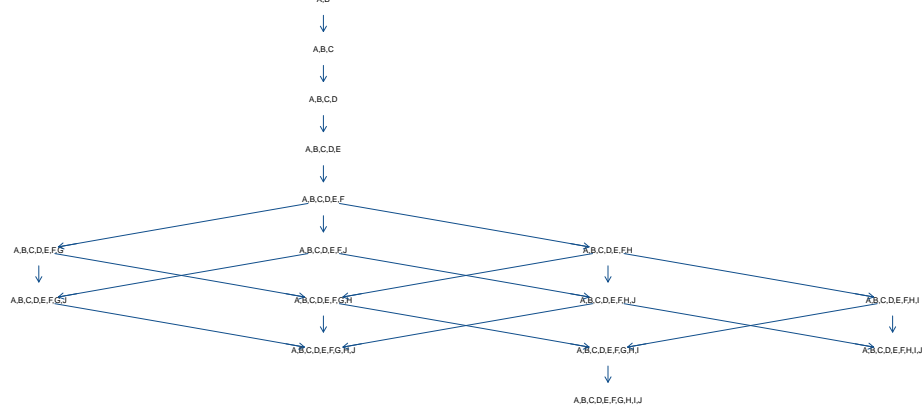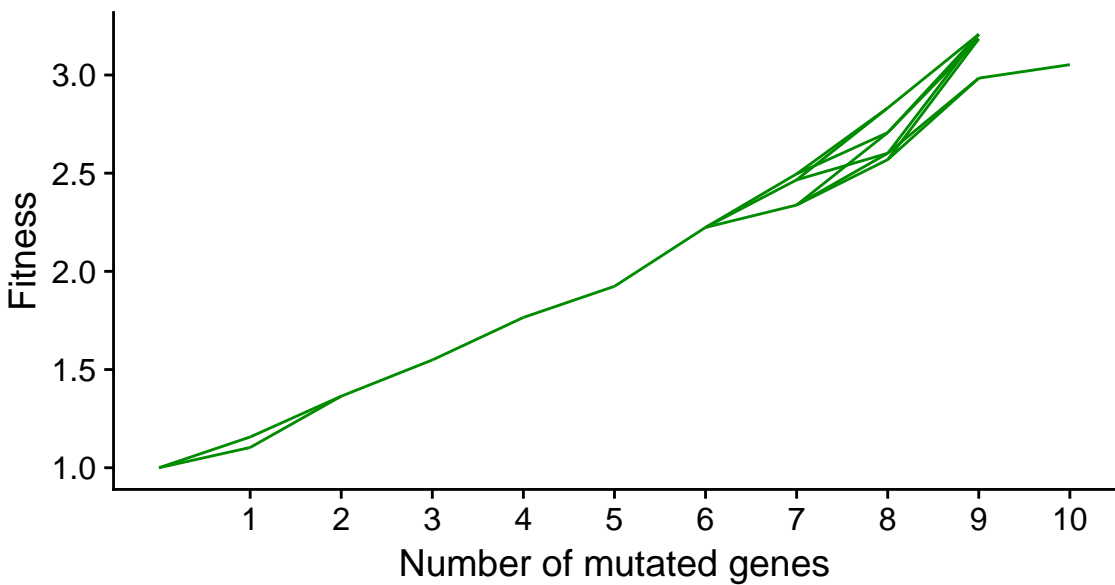

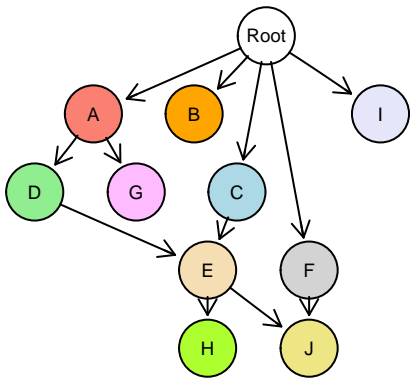

*ID* QpSOnt7M3hBKpMNs  
*acc genotypes* 128  
*peaks no back* 13  
*removed edges* 84  
*prop rem edges* 0.219

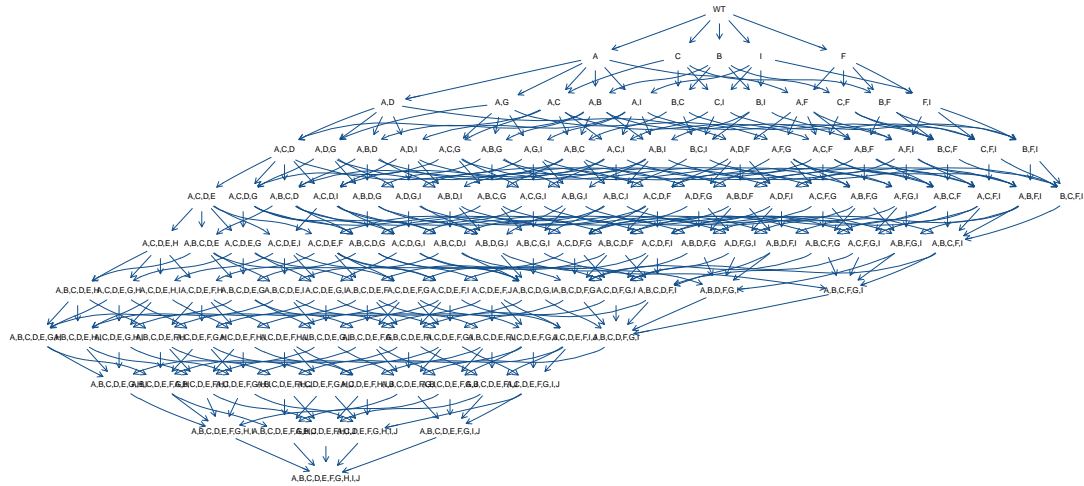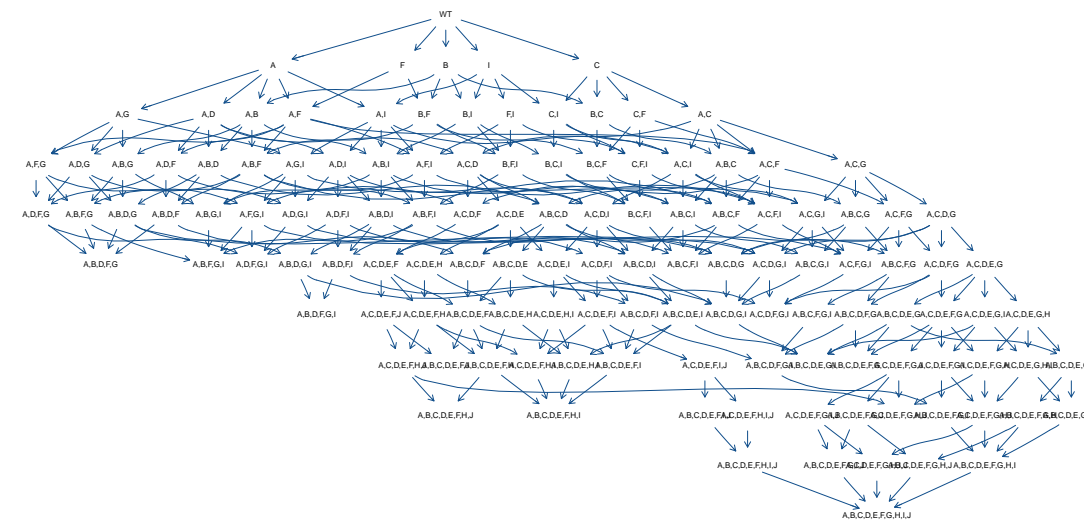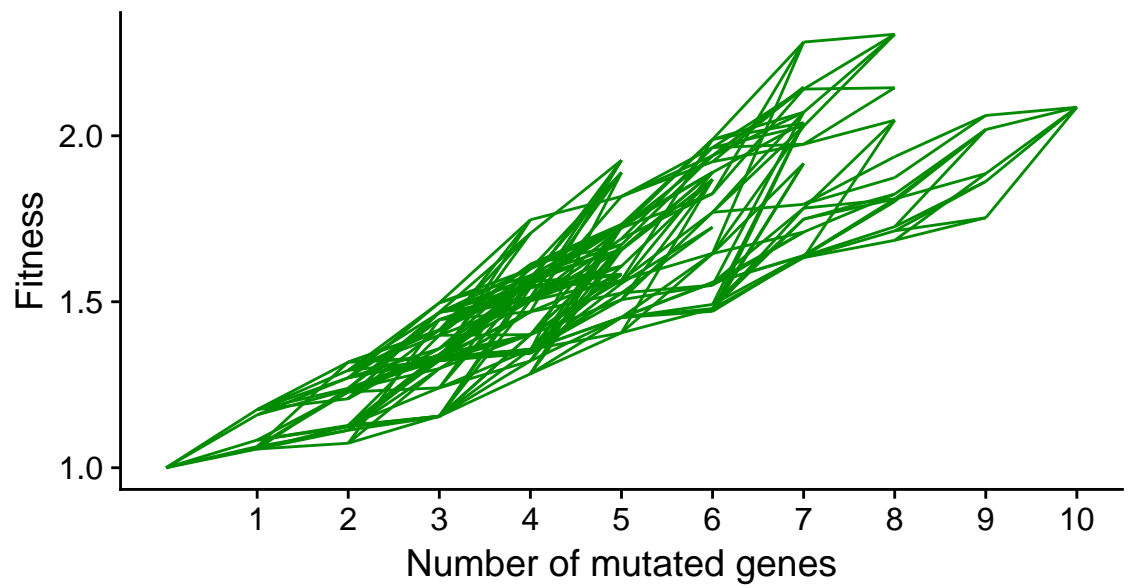

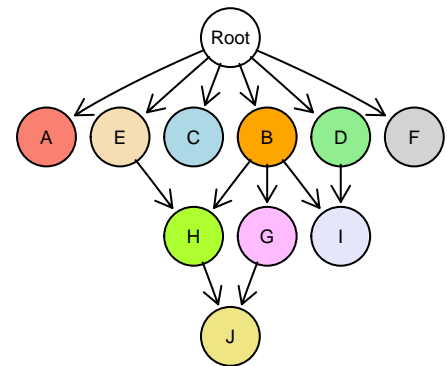

ID **QTeBb3tzhv6dF9ly**  
 acc genotypes **200**  
 peaks no back **16**  
 removed edges **103**  
 prop rem edges **0.154**

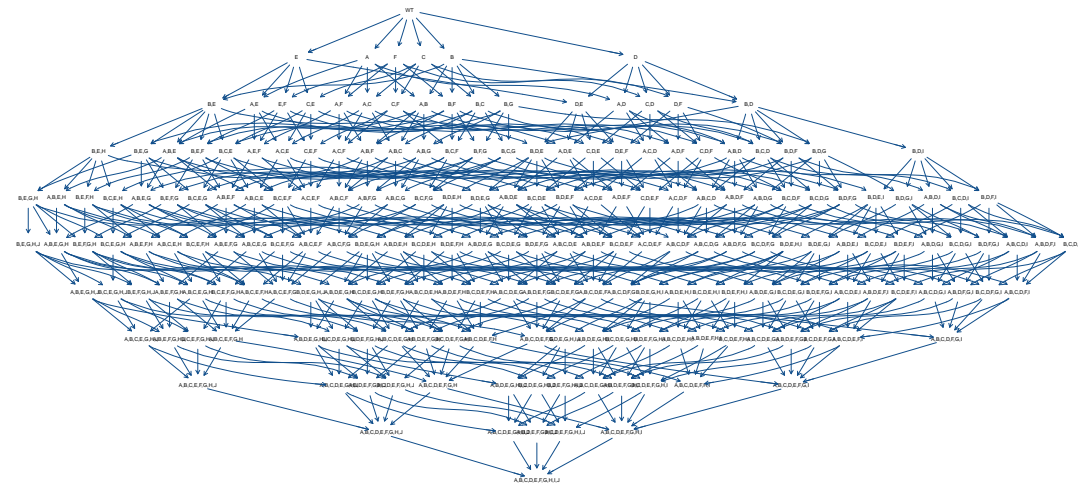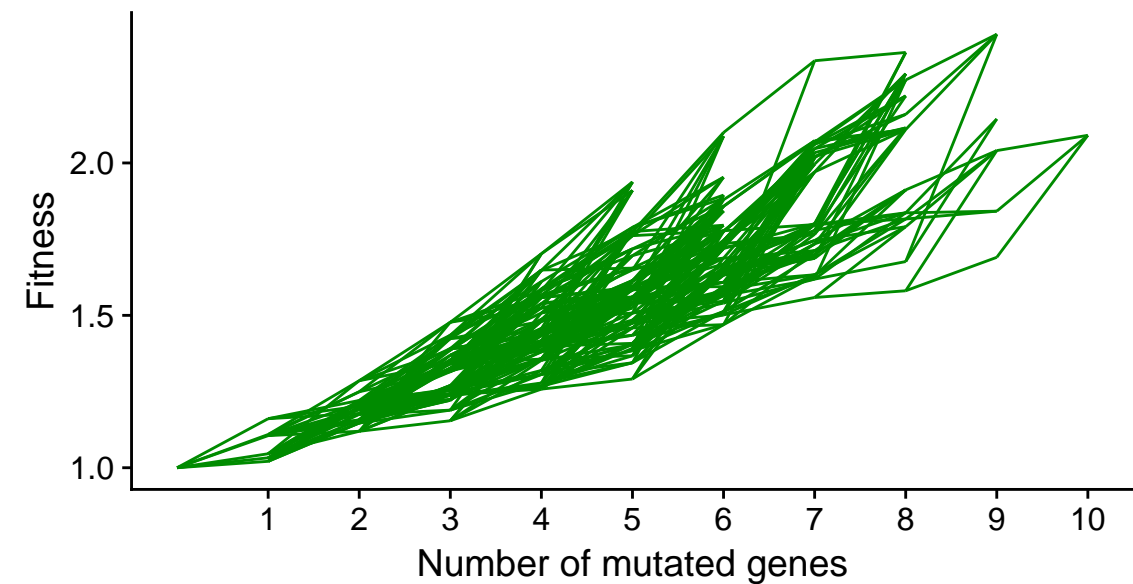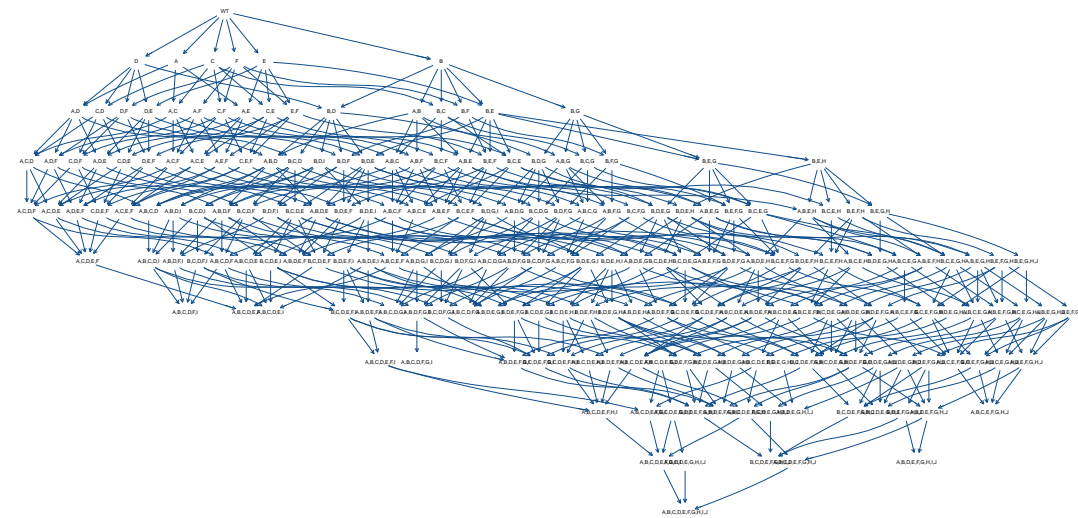

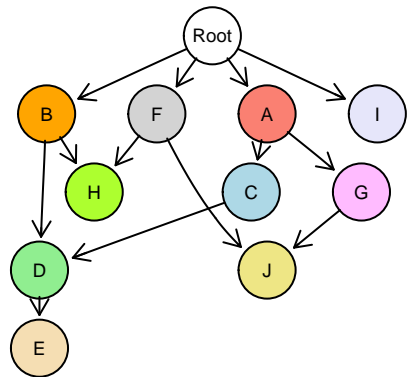

*ID* QVEfHMuWmdeBZFrT  
*acc genotypes* 94  
*peaks no back* 11  
*removed edges* 42  
*prop rem edges* 0.171

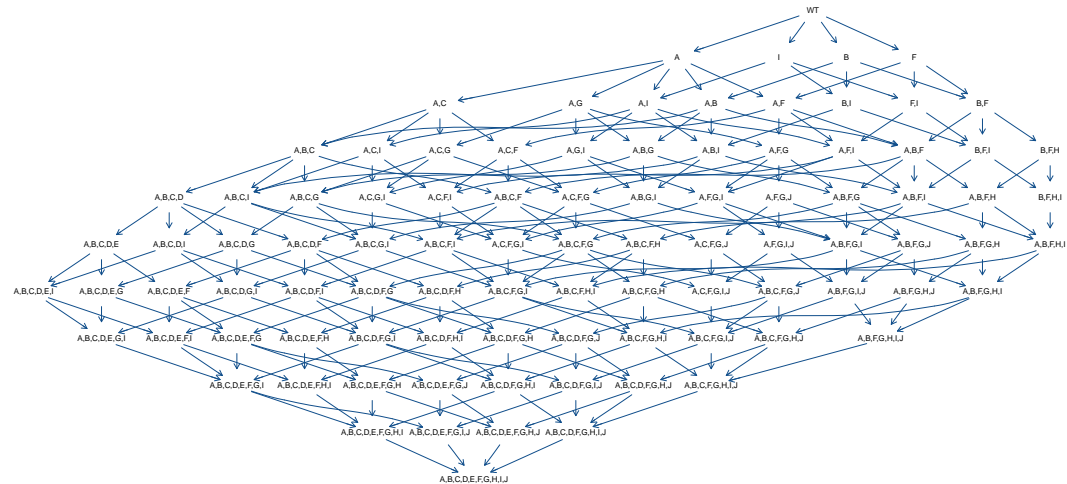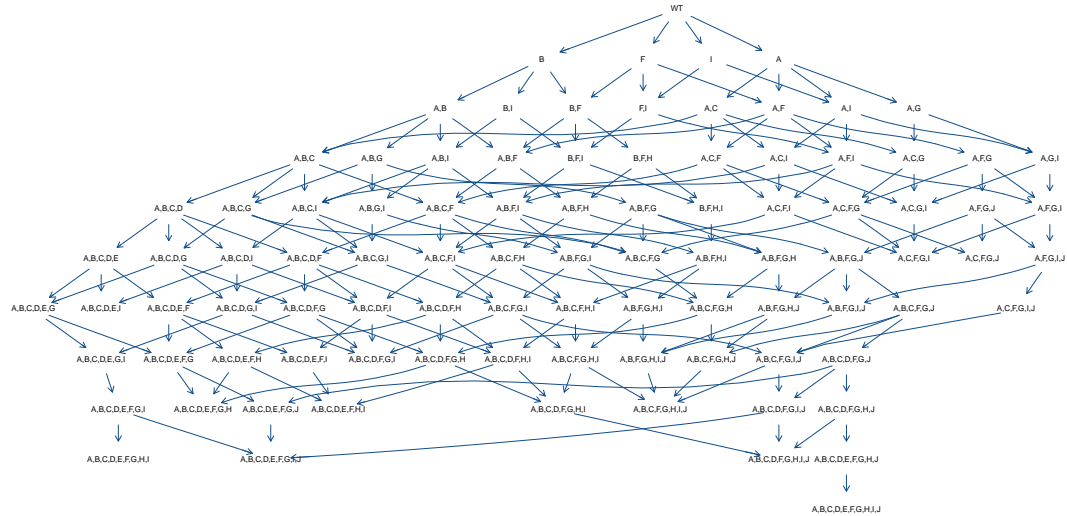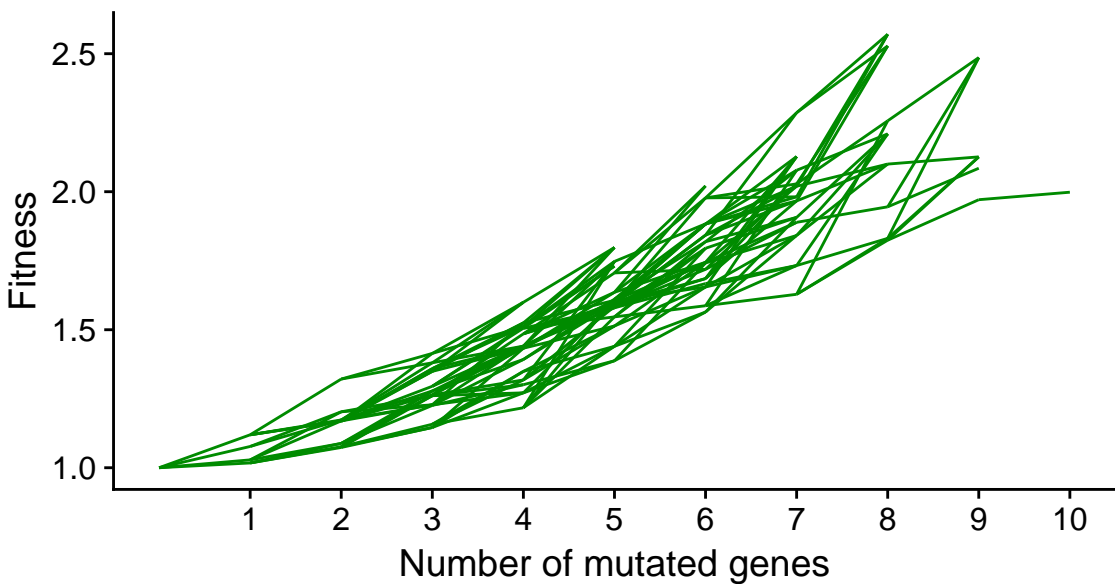



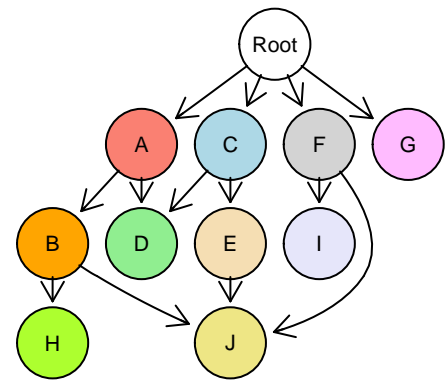

*ID* qzPma2ONgy7W10OcP  
*acc genotypes* 124  
*peaks no back* 12  
*removed edges* 68  
*prop rem edges* 0.192

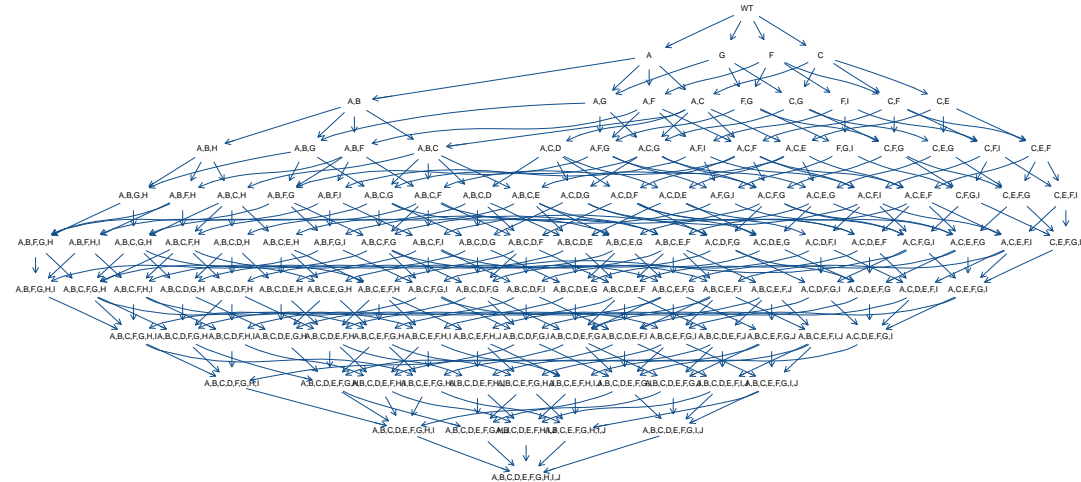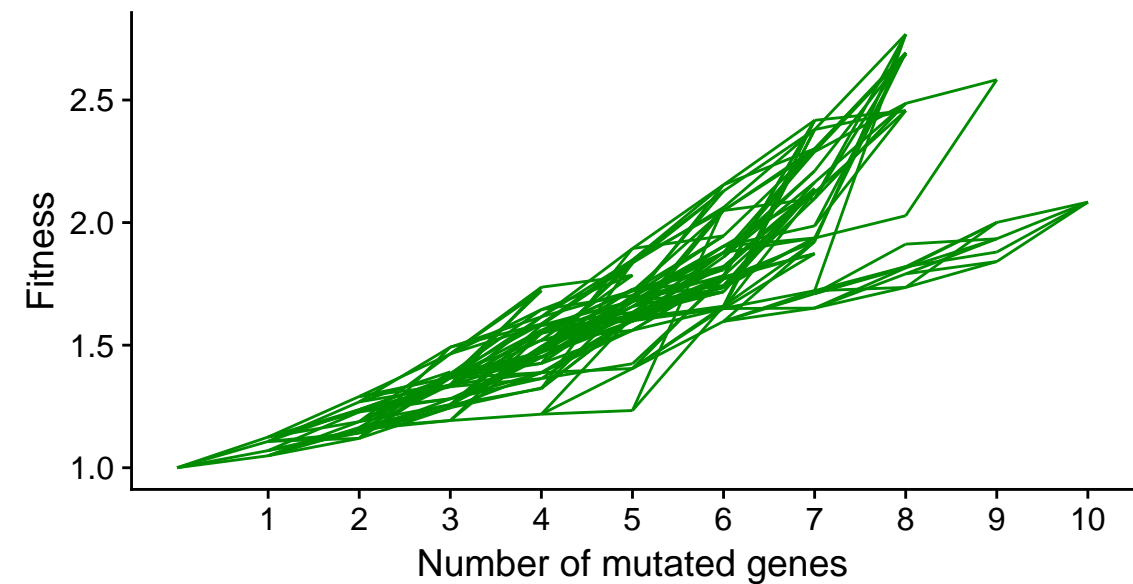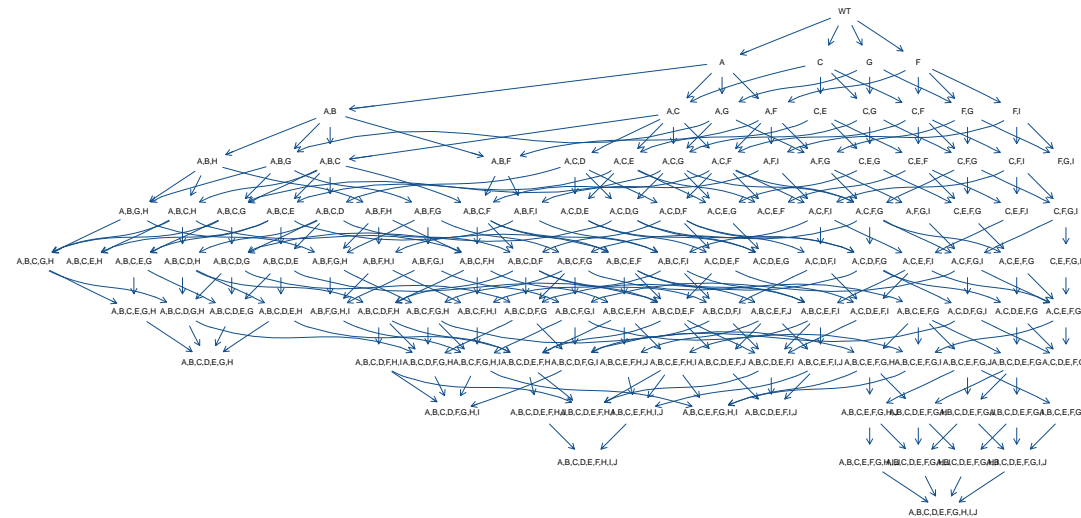

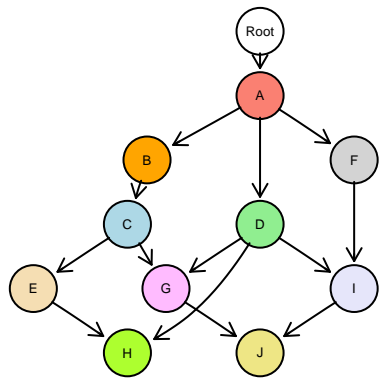

ID **r10ojqpU7Q5rU9ub3**  
 acc genotypes **36**  
 peaks no back **6**  
 removed edges **12**  
 prop rem edges **0.179**

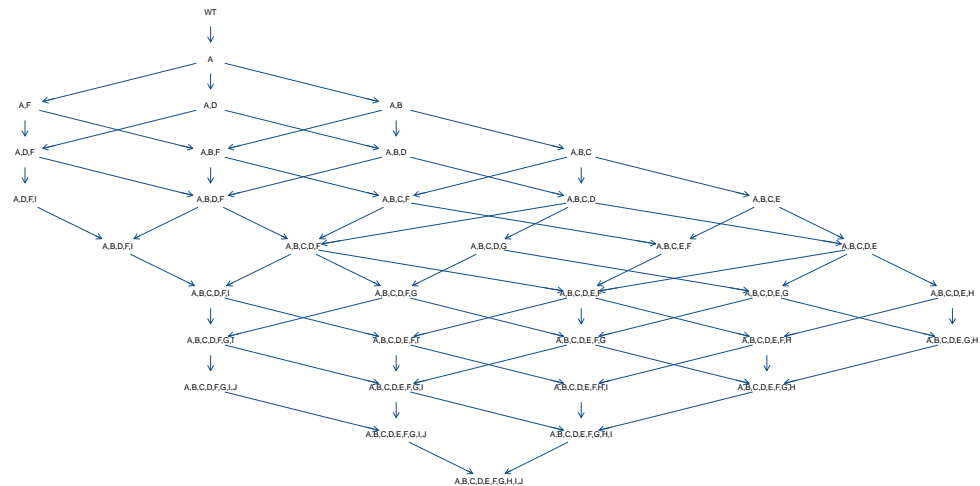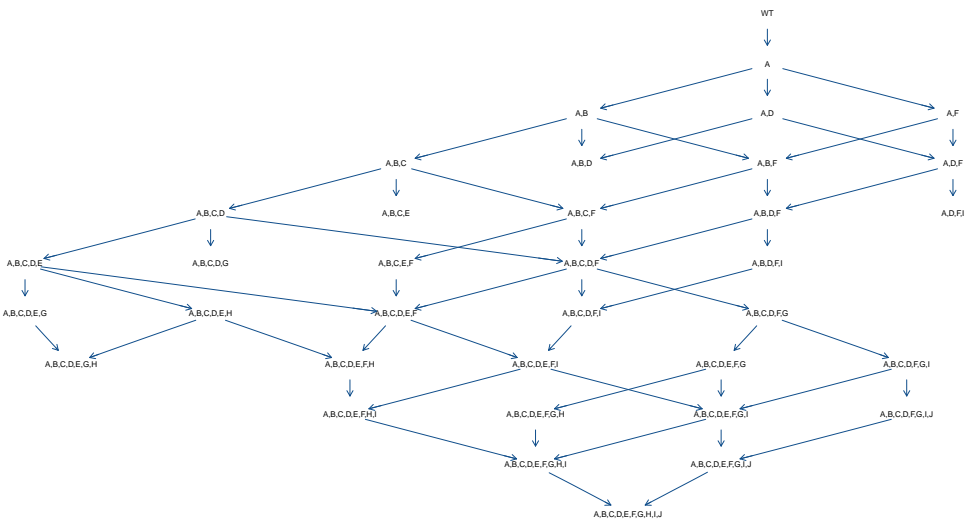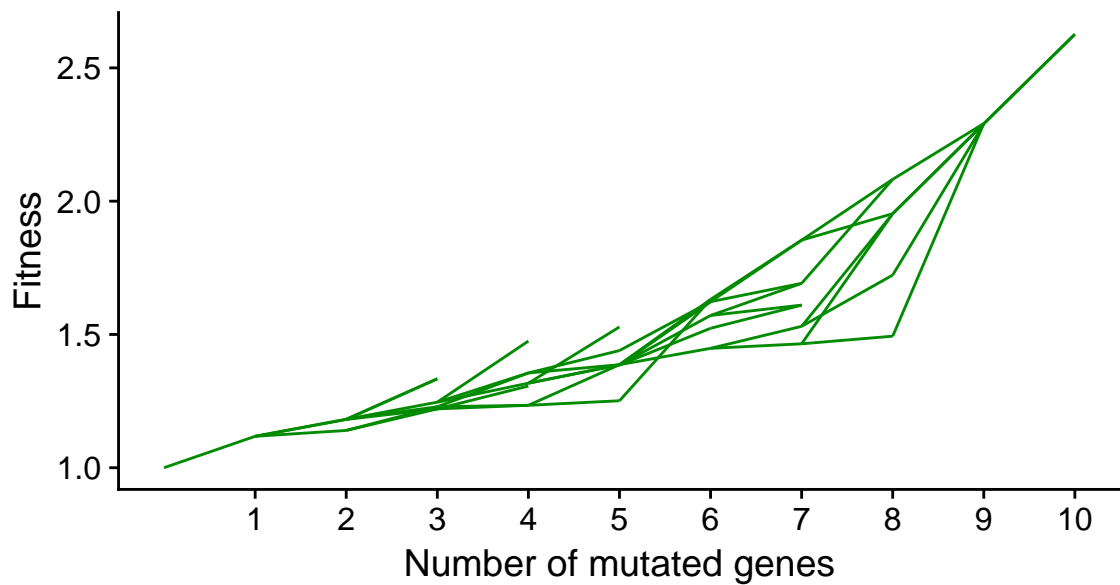

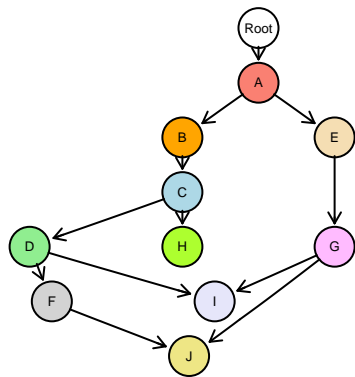

ID R4ZN7nnB4ujxYI9L  
 acc genotypes 33  
 peaks no back 5  
 removed edges 8  
 prop rem edges 0.133

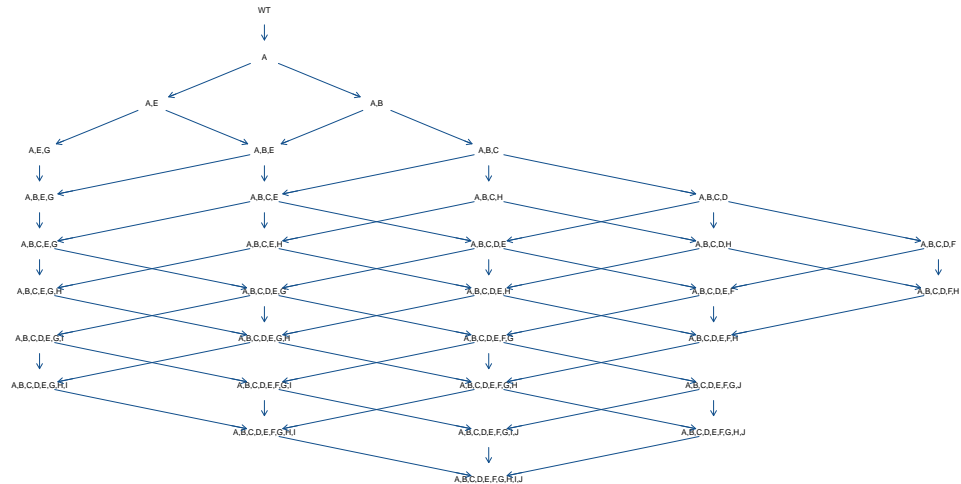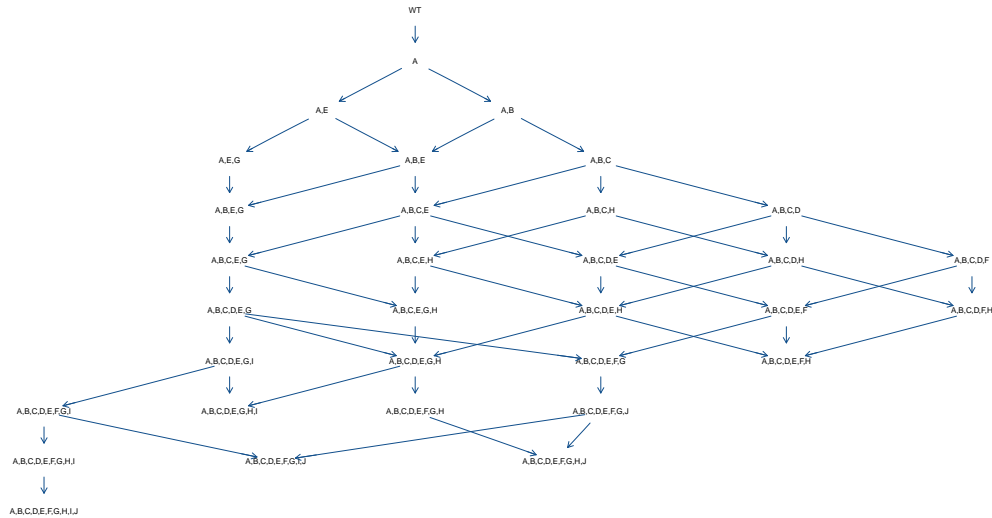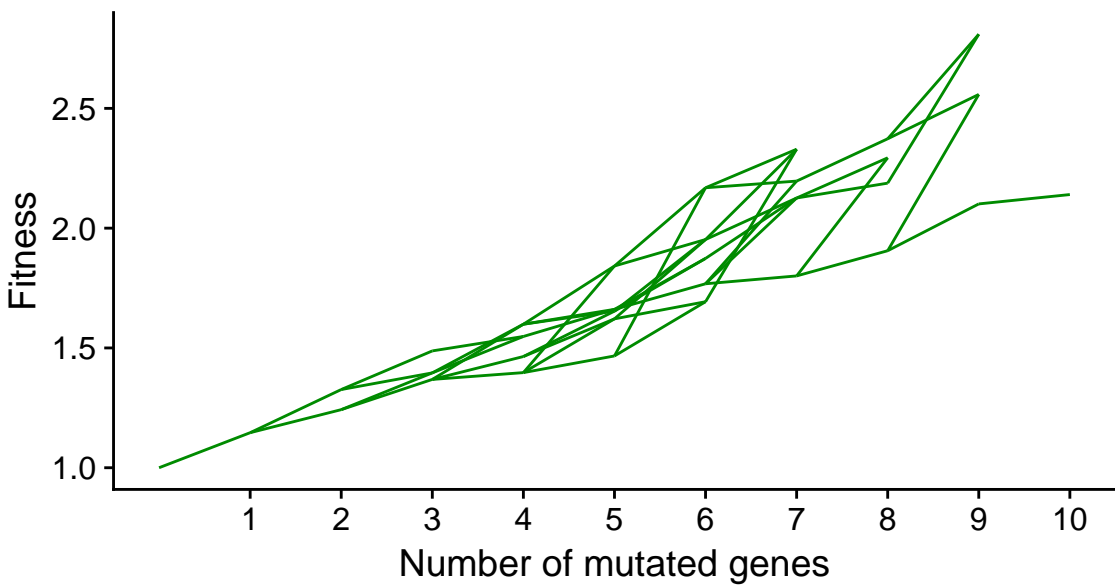

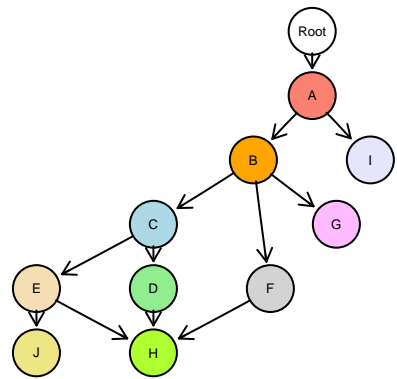

ID **R5Ulg5w7GGy7xUcV**  
 acc genotypes **67**  
 peaks no back **8**  
 removed edges **36**  
 prop rem edges **0.209**

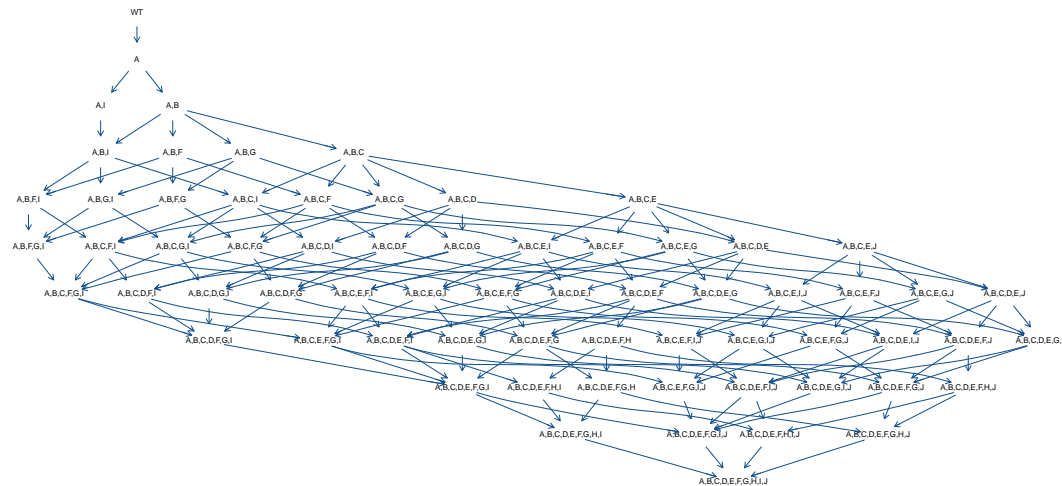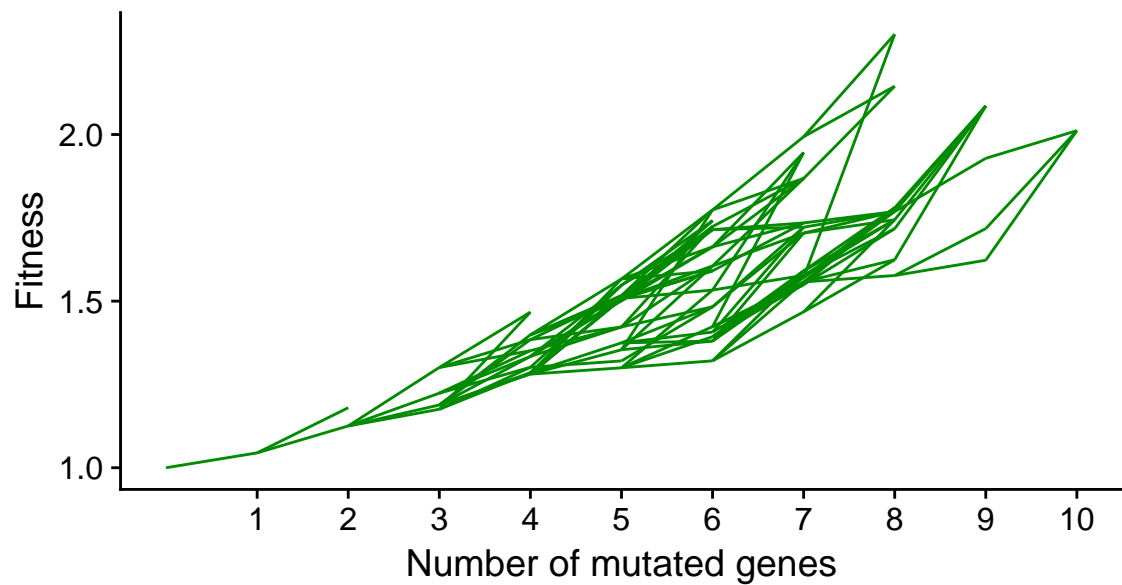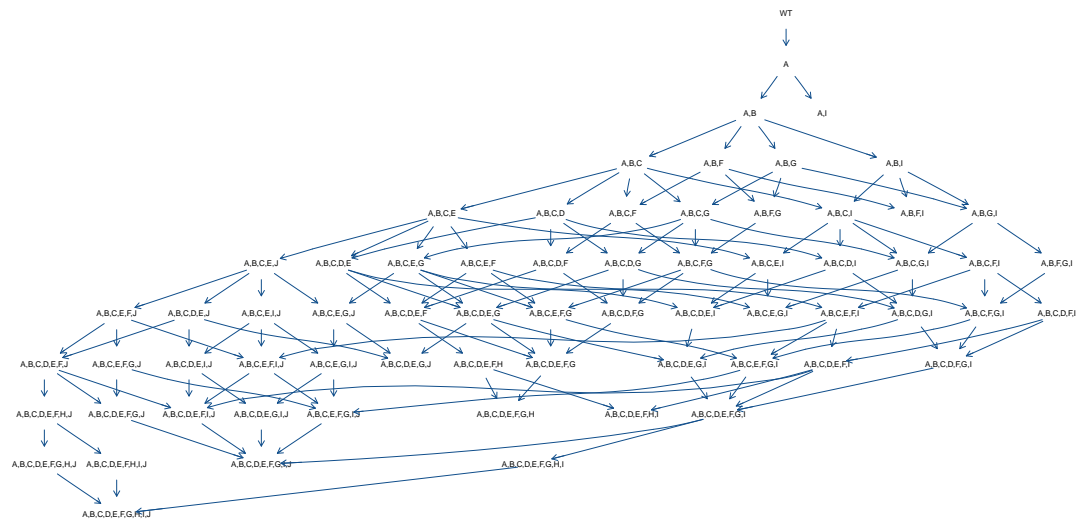

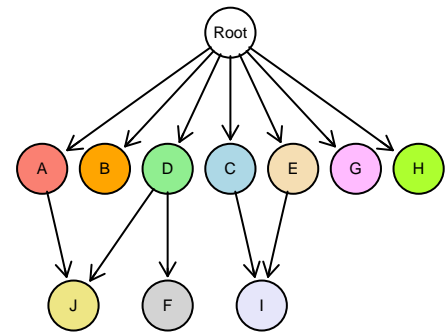

*ID* RcLGnMwFAV7yHcPX  
*acc genotypes* 320  
*peaks no back* 19  
*removed edges* 237  
*prop rem edges* 0.198

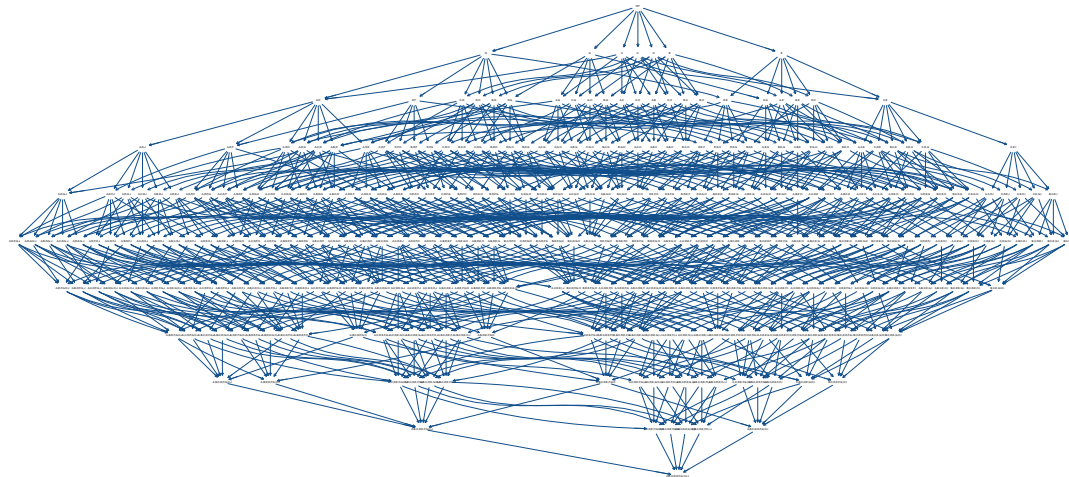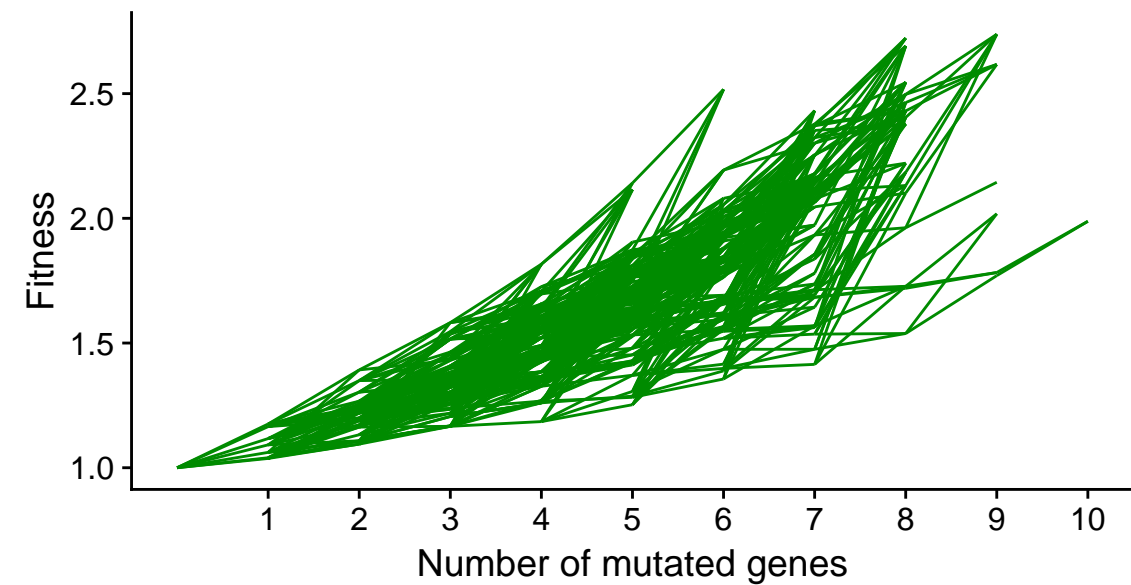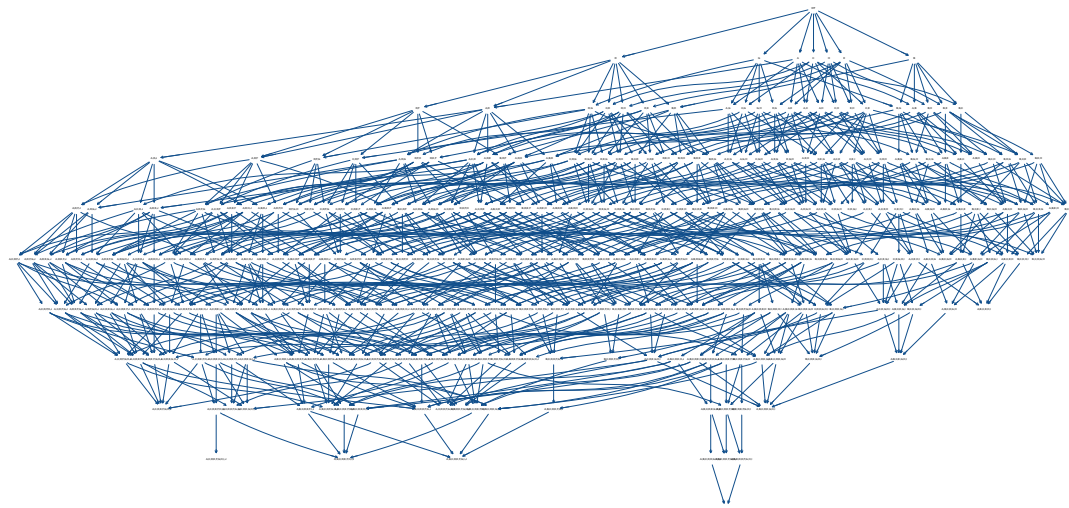

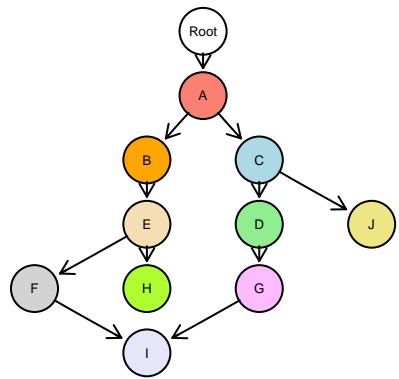

ID RMPsjUicmruxvFMT  
 acc genotypes 47  
 peaks no back 8  
 removed edges 22  
 prop rem edges 0.222

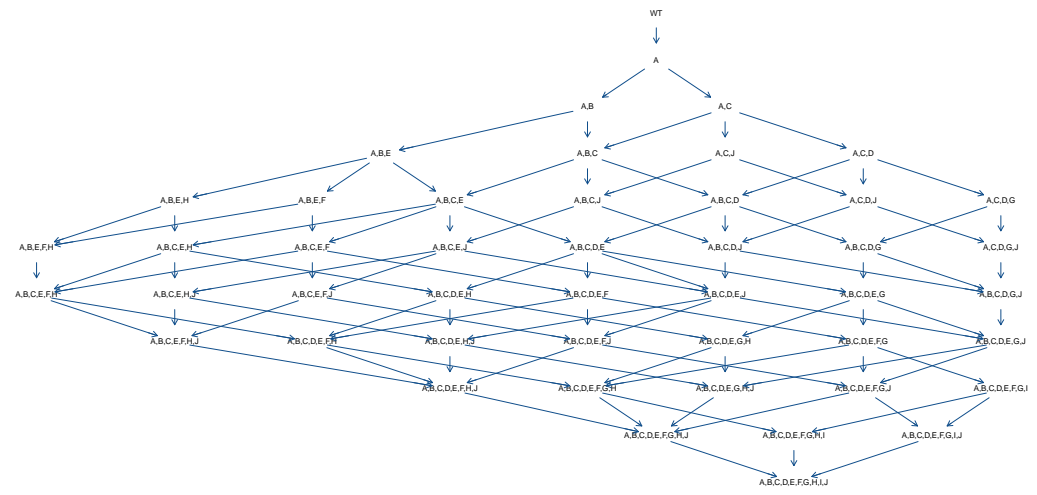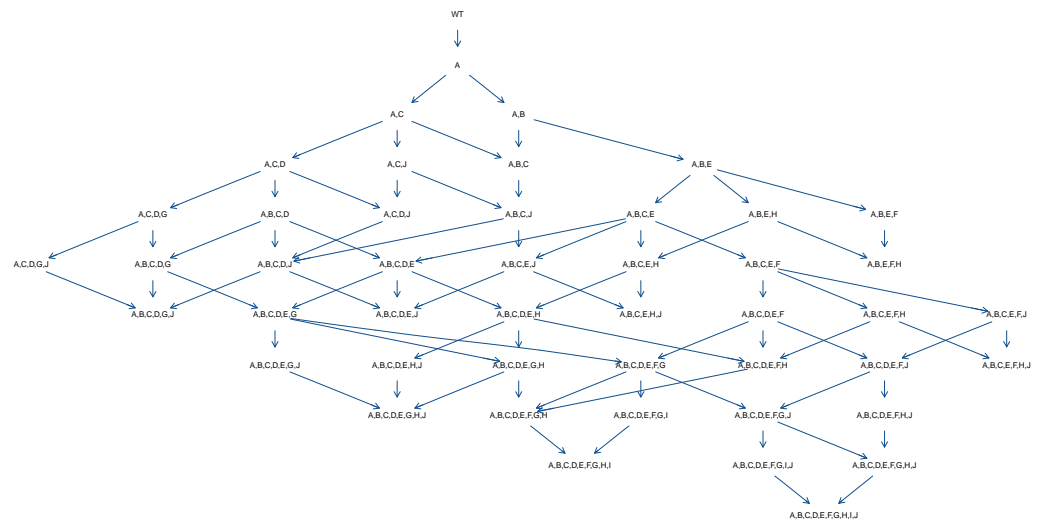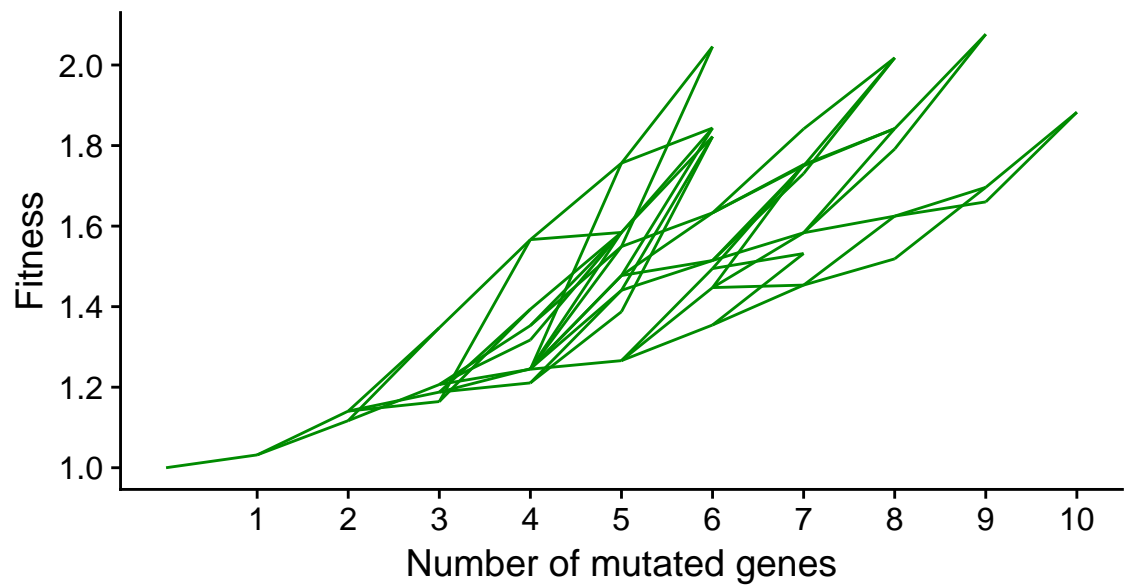

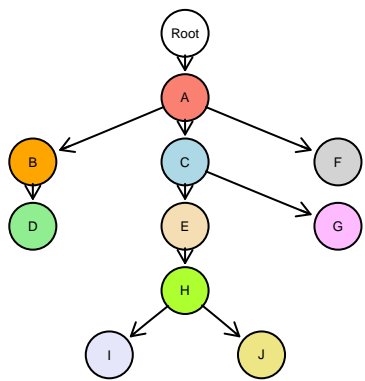

ID **rRQ3Bws3107fO7mHM**  
 acc genotypes **79**  
 peaks no back **11**  
 removed edges **41**  
 prop rem edges **0.199**

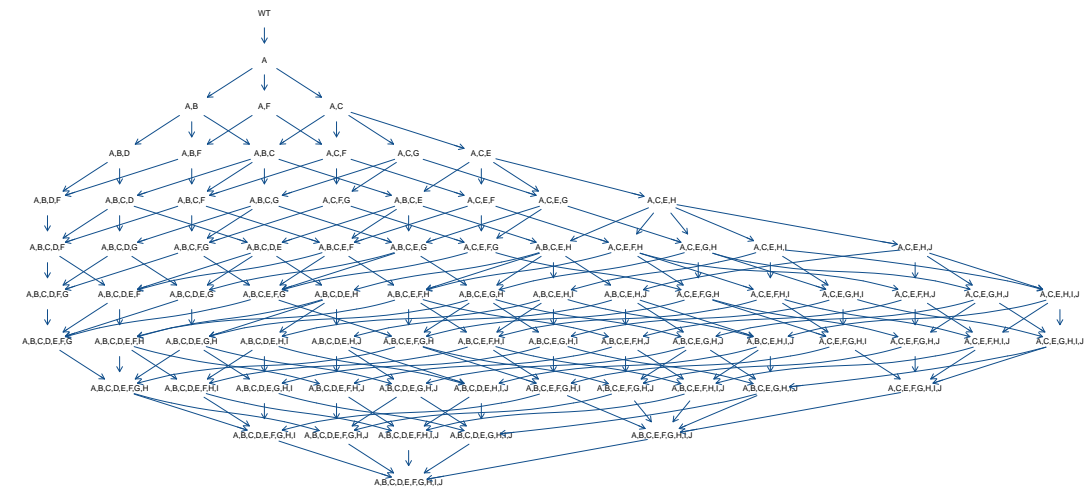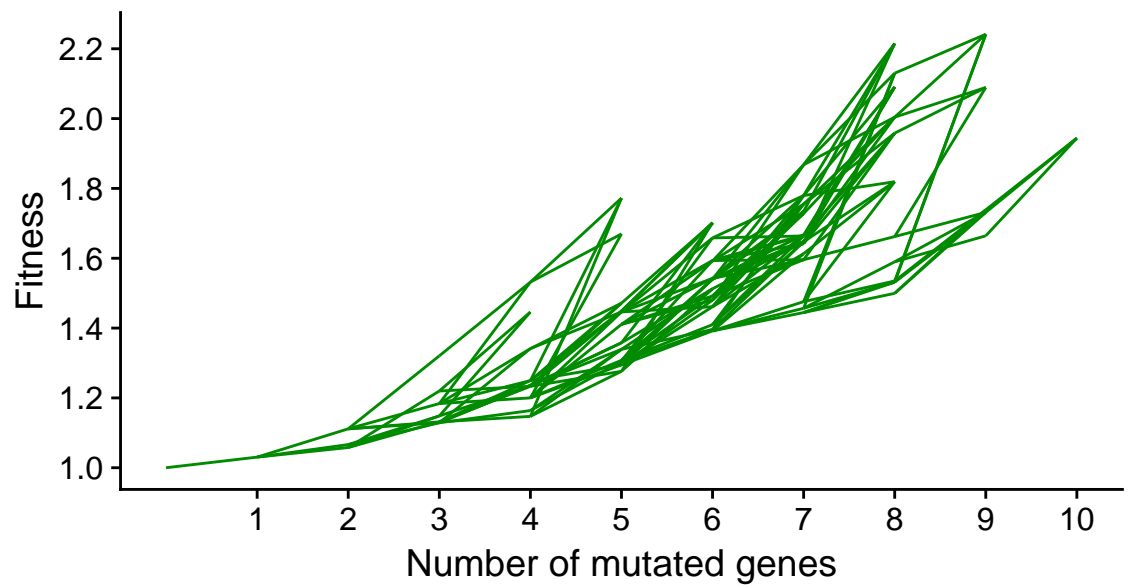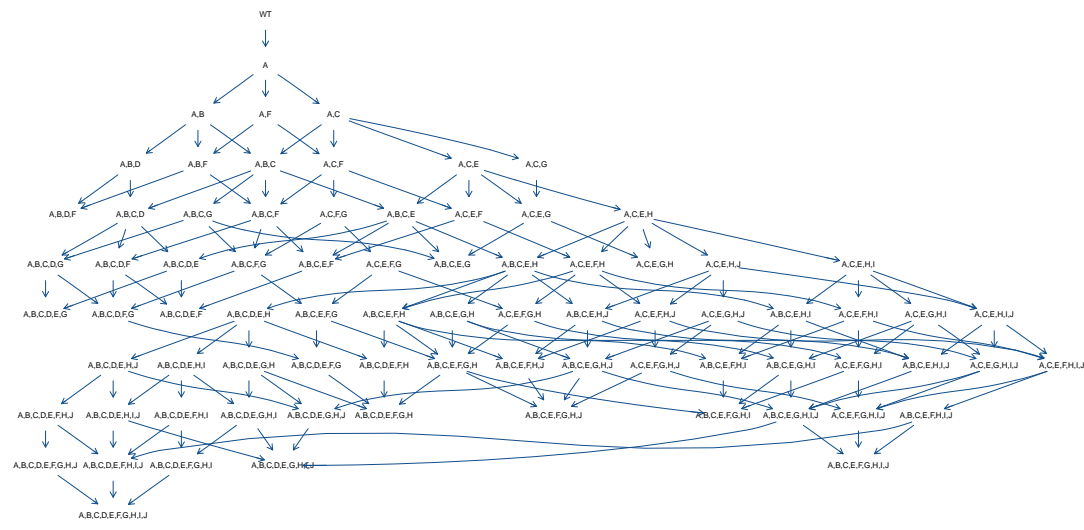

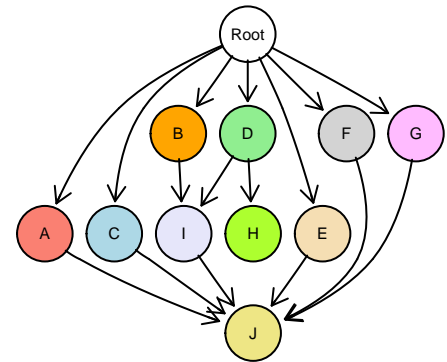

*ID*      **SArTeHv6MV7tVCry**  
*acc genotypes*      **258**  
*peaks no back*      **16**  
*removed edges*      **161**  
*prop rem edges*      **0.167**

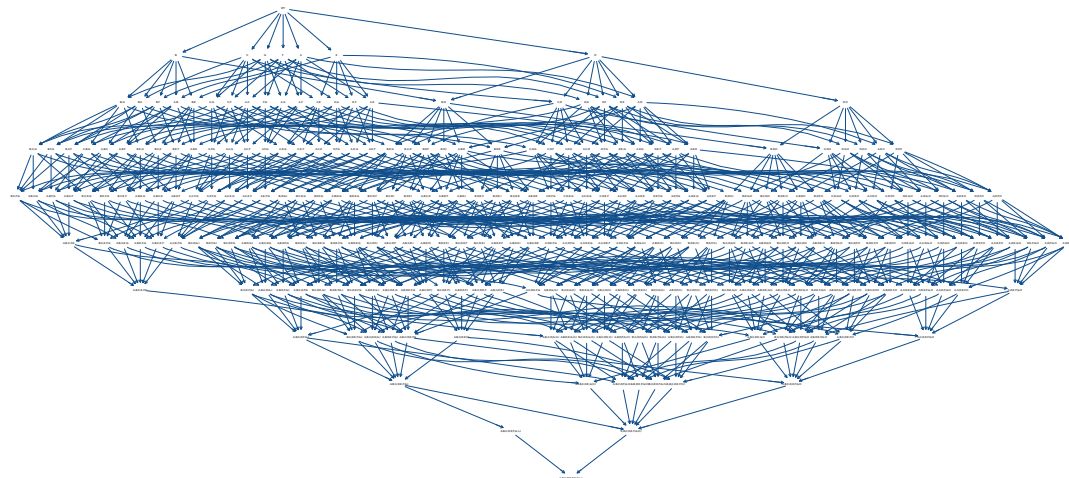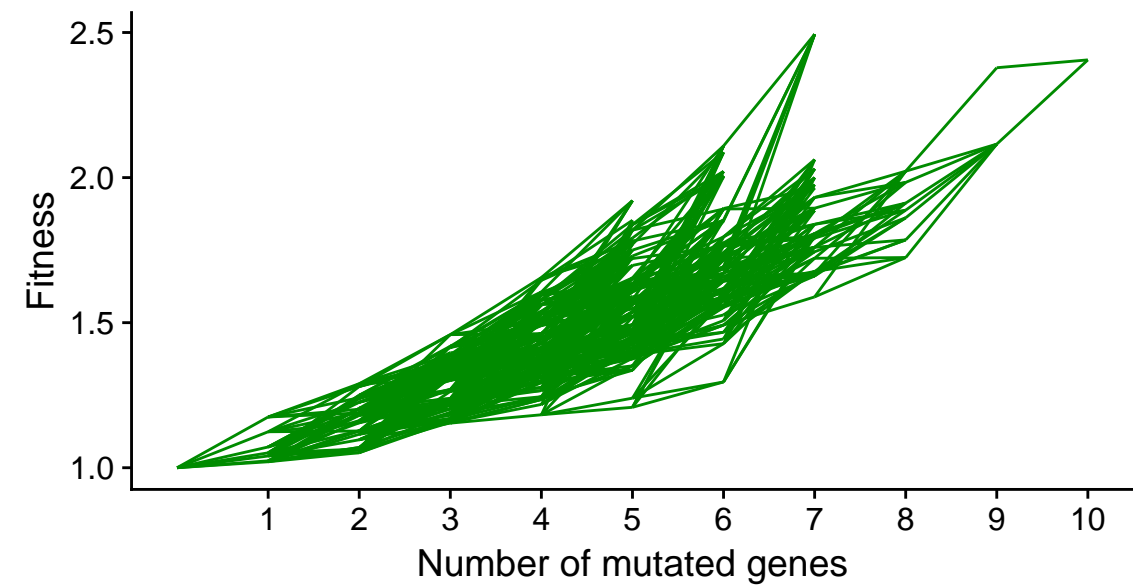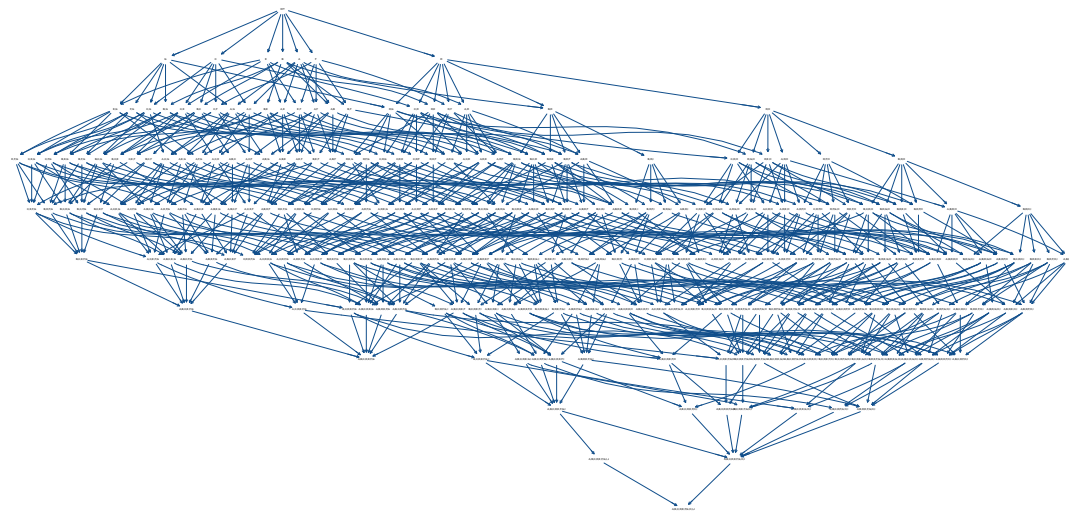



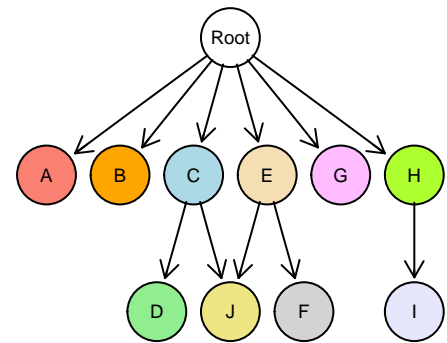

*ID* SIYbZPVjDjsPd3OJ  
*acc genotypes* 312  
*peaks no back* 21  
*removed edges* 259  
*prop rem edges* 0.224

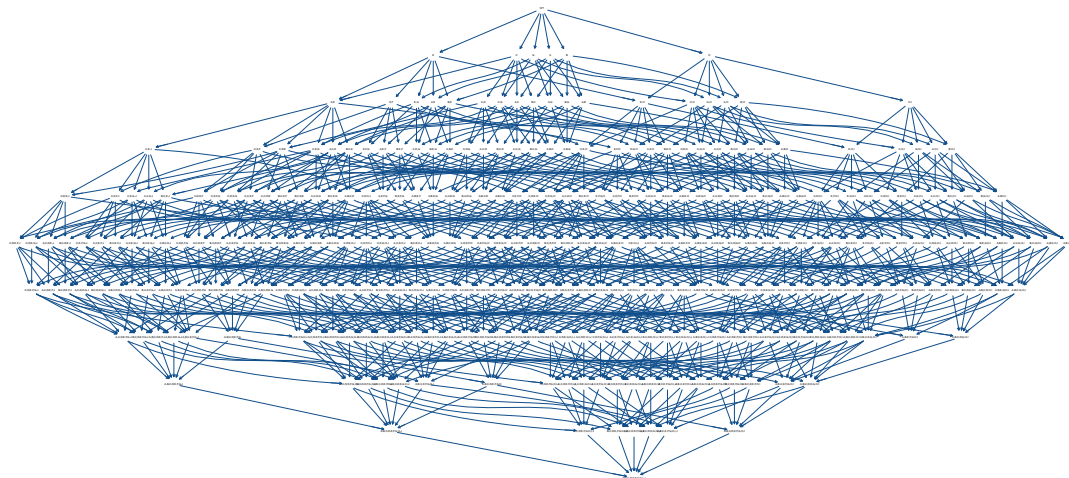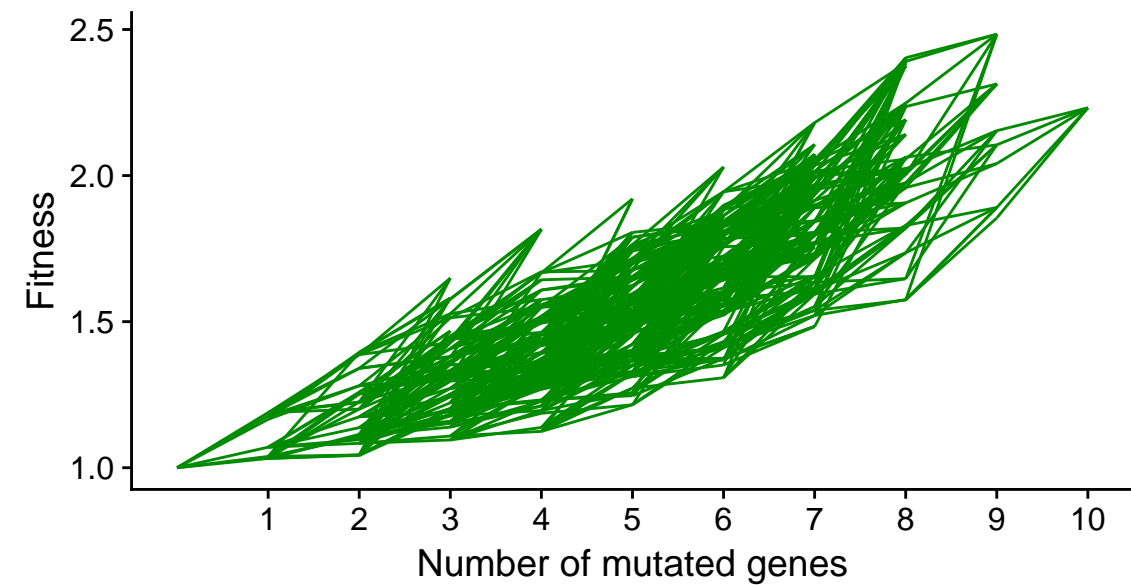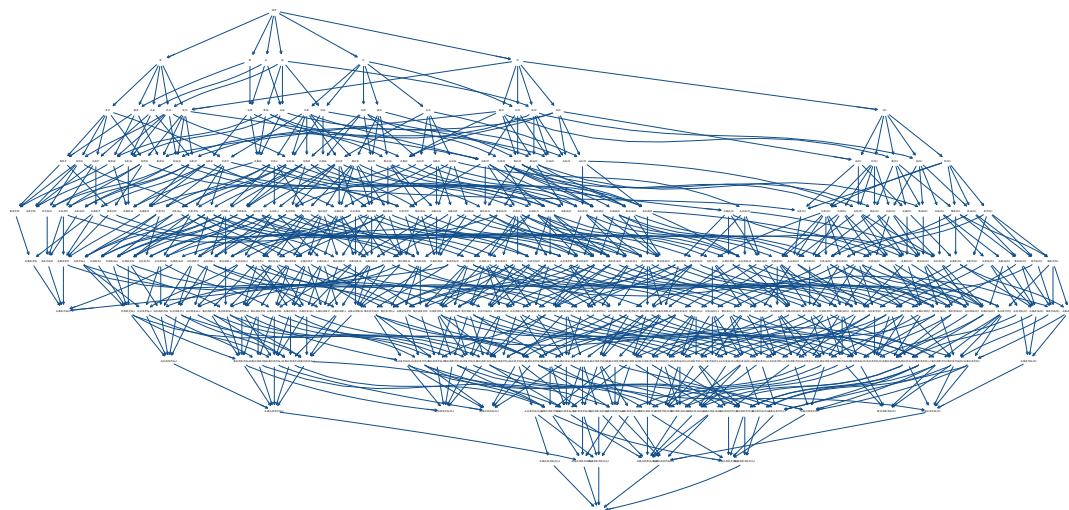

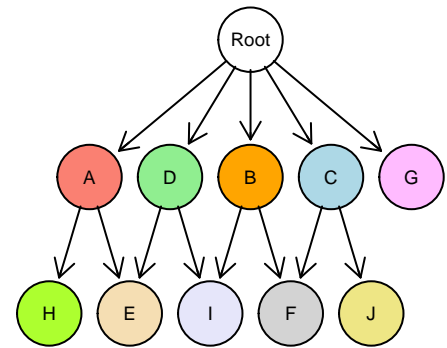

ID smwY8F2IPkzSNFOb  
 acc genotypes 178  
 peaks no back 17  
 removed edges 101  
 prop rem edges 0.181

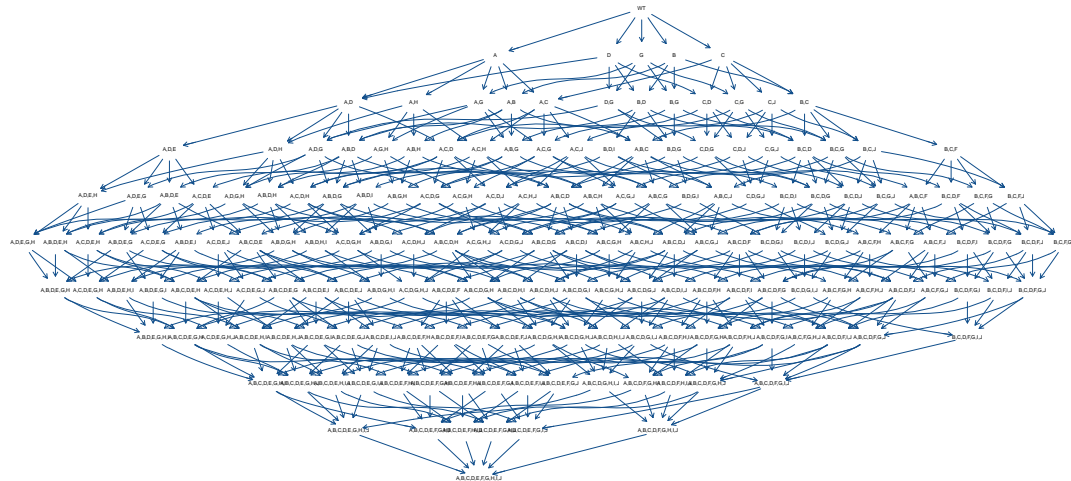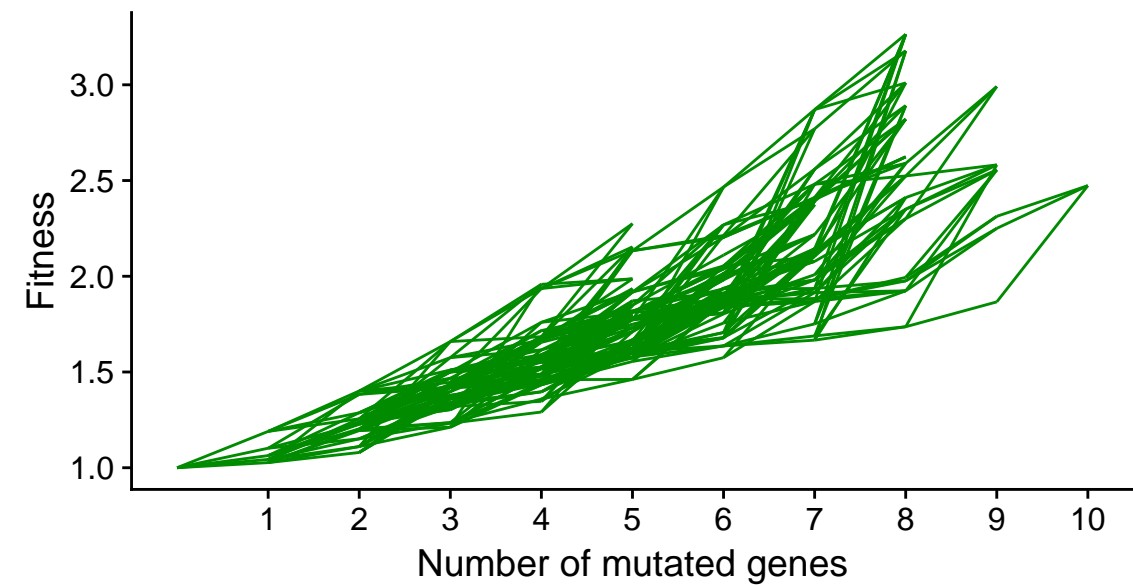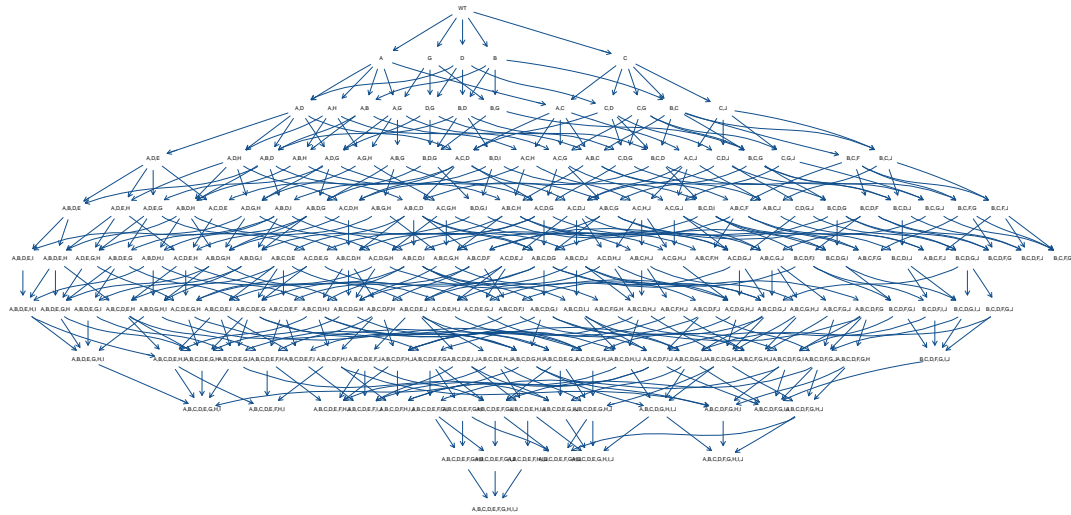

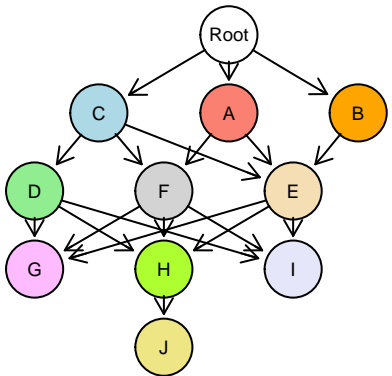

ID [sO7ye5yMrhvX10WZQ](#)  
 acc genotypes 31  
 peaks no back 2  
 removed edges 2  
 prop rem edges 0.036

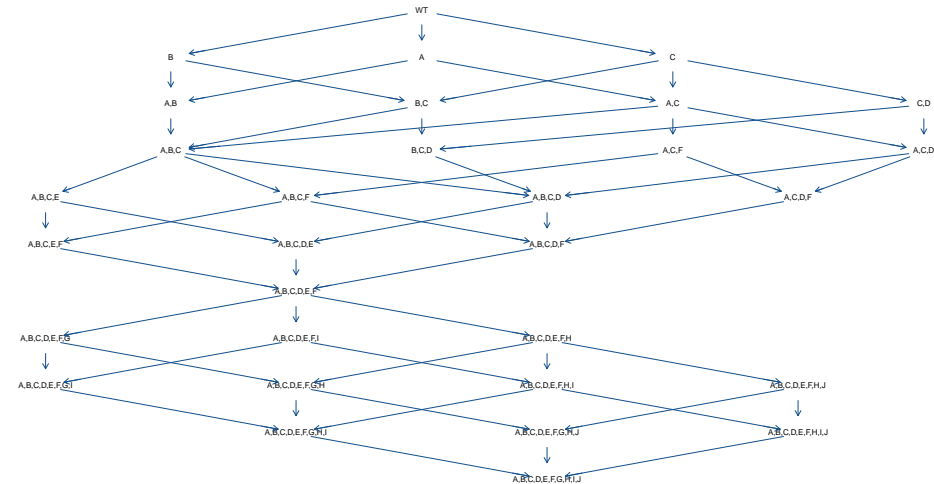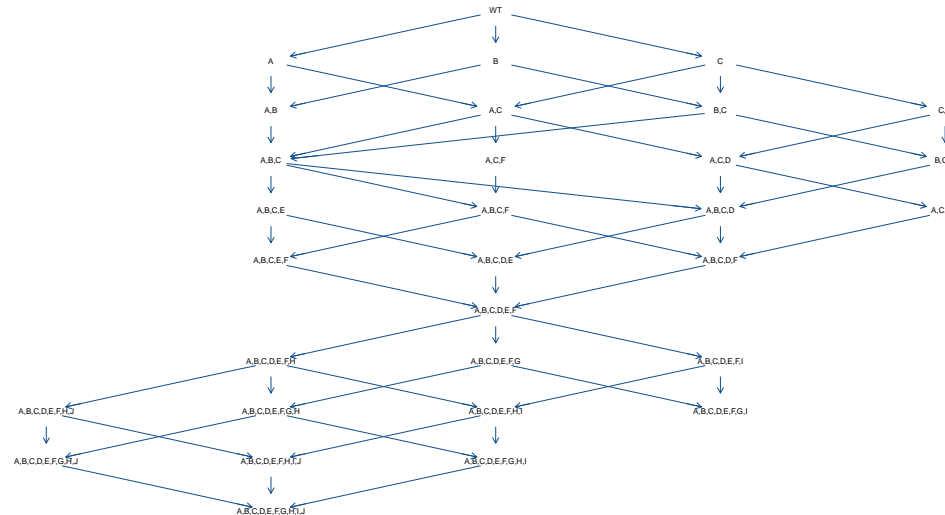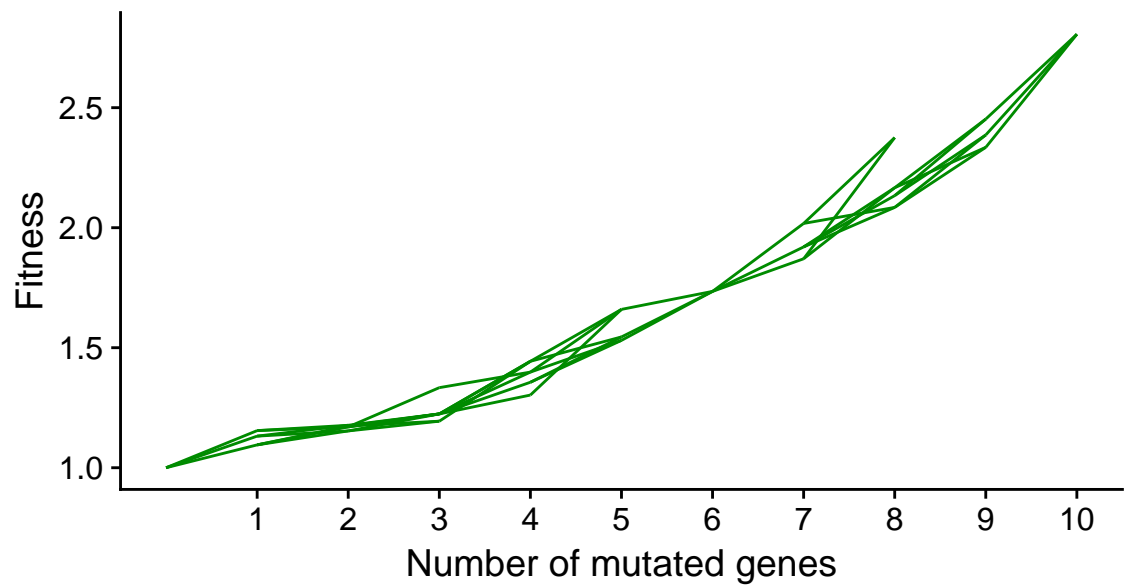

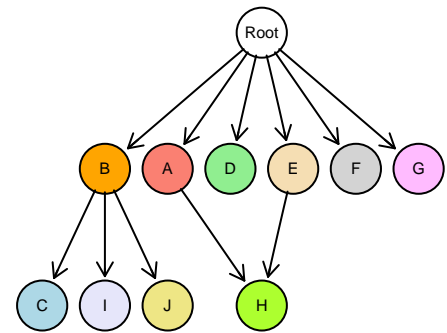

*ID* sUe5FH9IUIMDii10B  
*acc genotypes* 360  
*peaks no back* 23  
*removed edges* 252  
*prop rem edges* 0.177

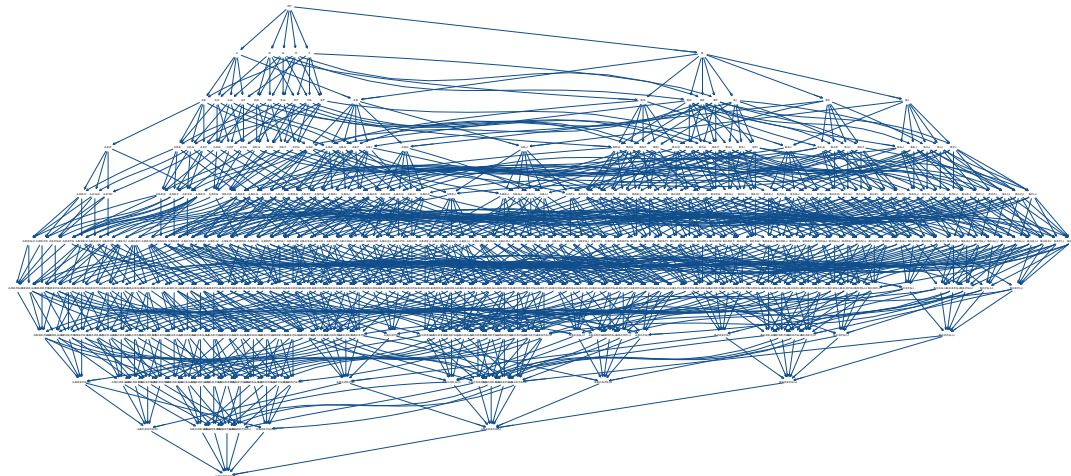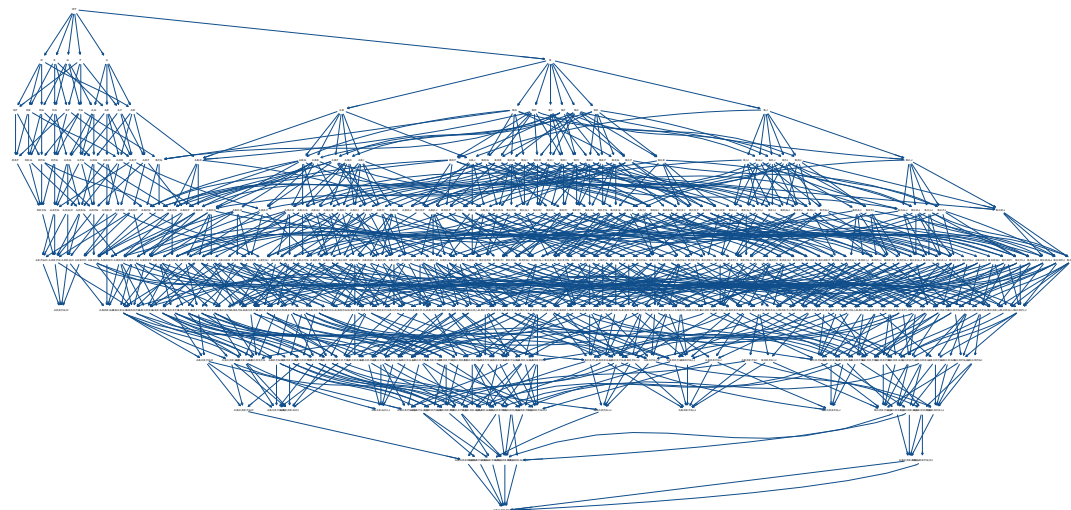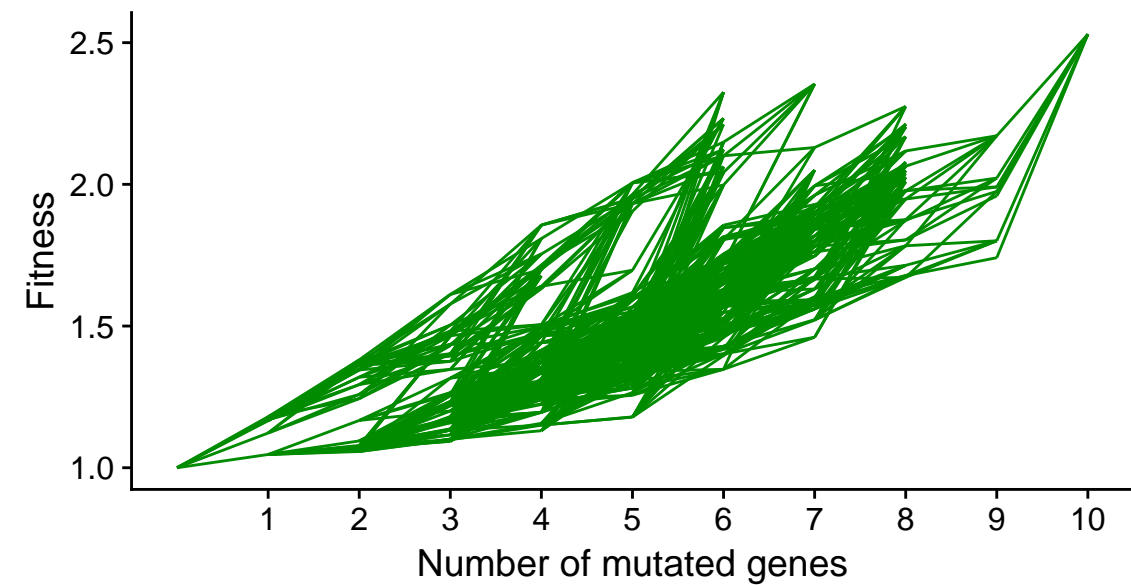

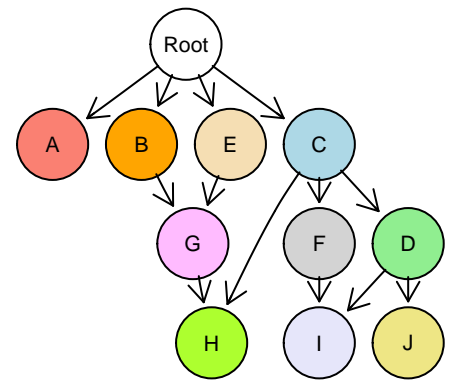

*ID* SWgUDoSpxMcdnnQM  
*acc genotypes* 106  
*peaks no back* 12  
*removed edges* 52  
*prop rem edges* 0.18

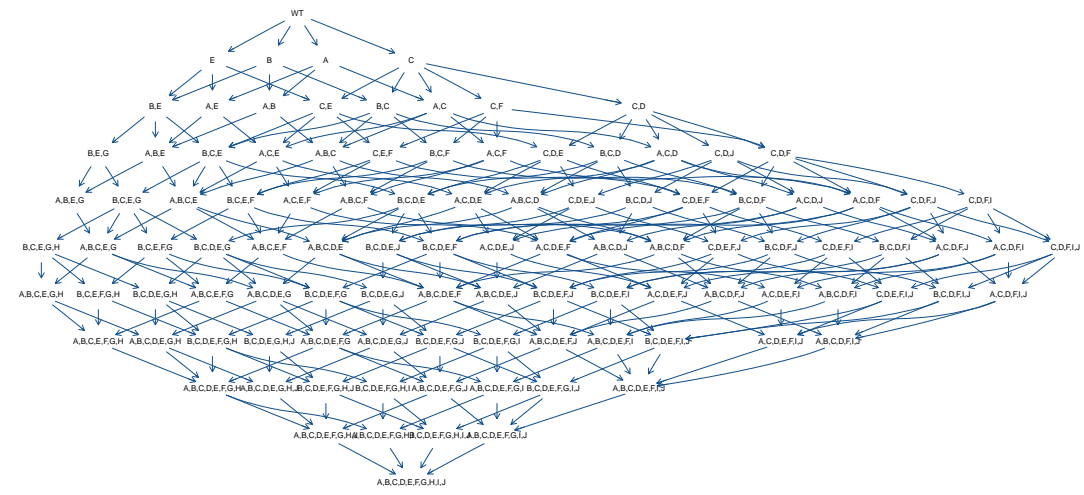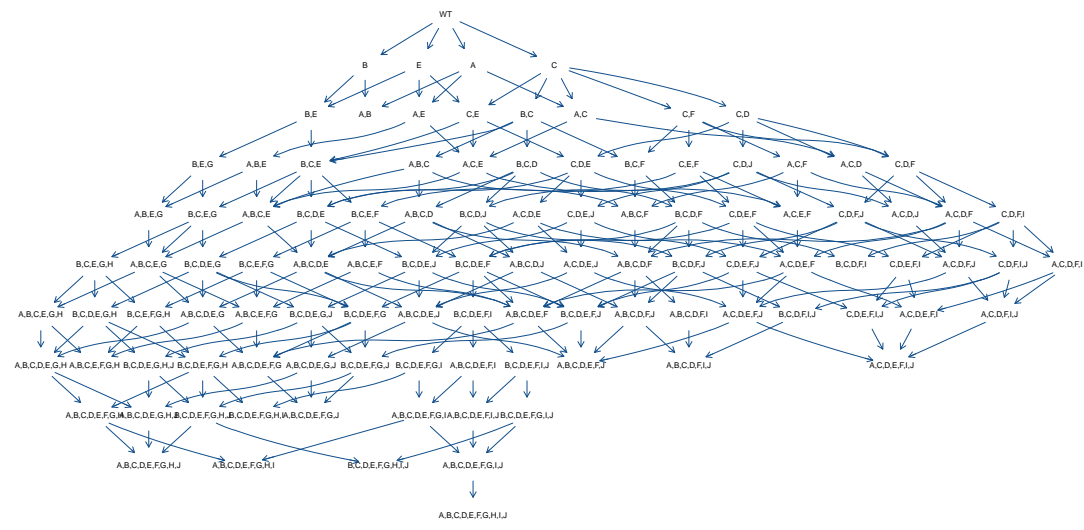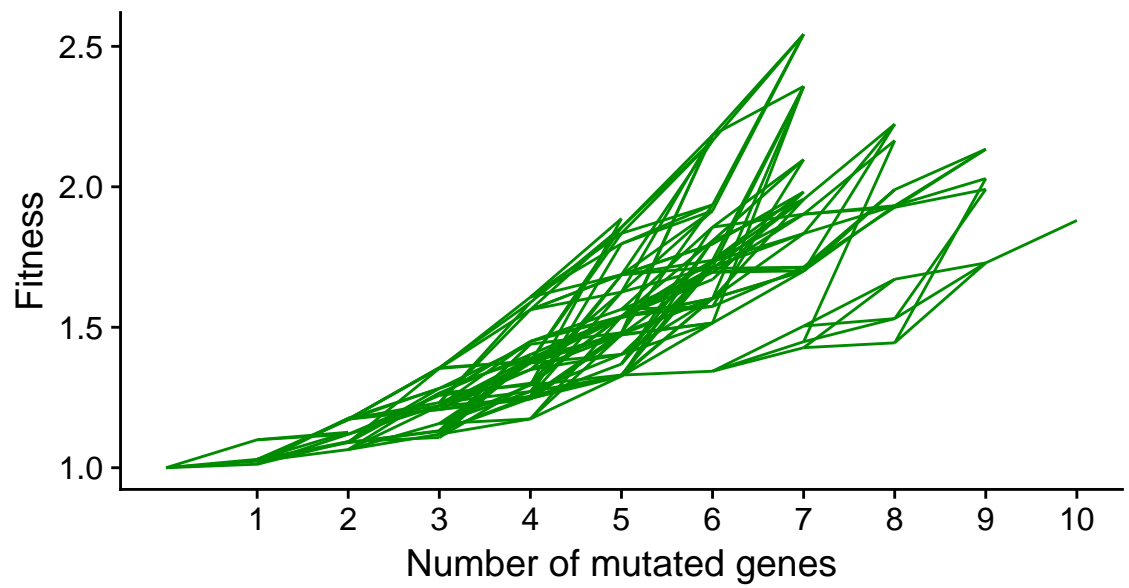

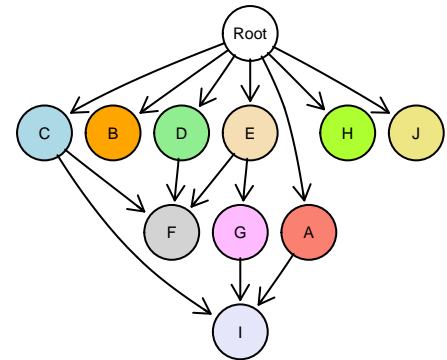

*ID* [sxE6qJHh512sjV9a](#)  
*acc genotypes* 248  
*peaks no back* 16  
*removed edges* 163  
*prop rem edges* 0.183

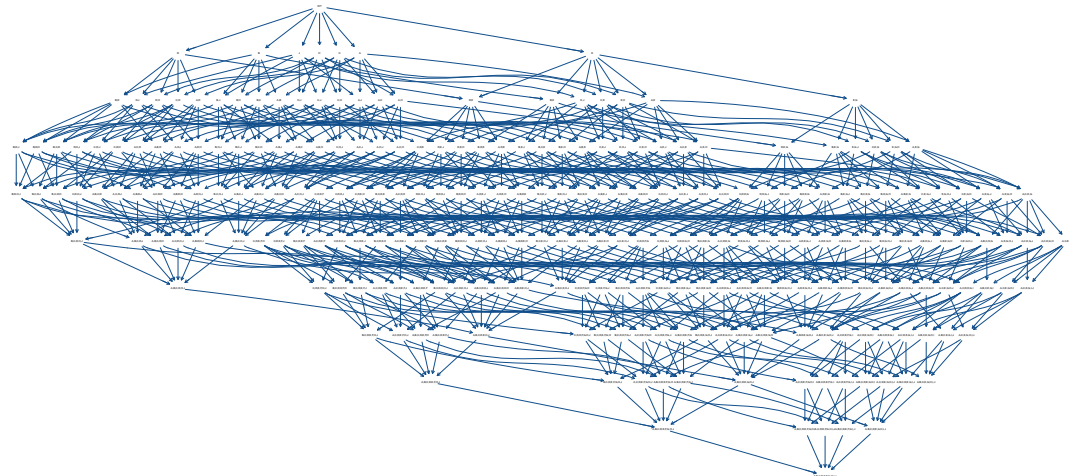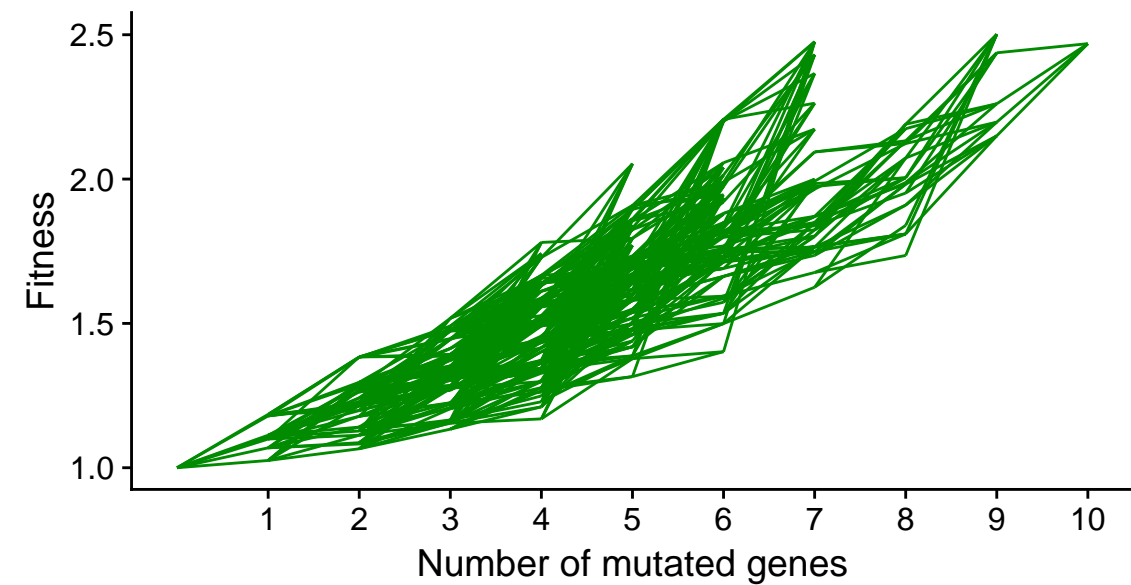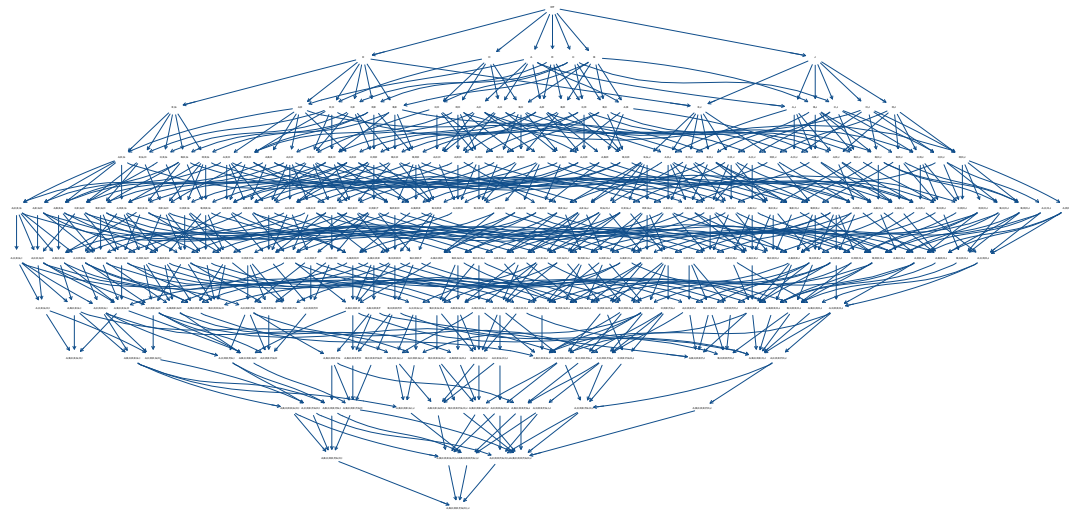

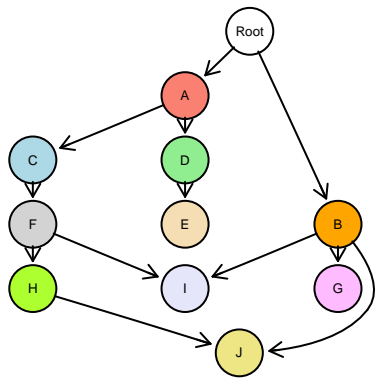

ID **t10jgW9R9zZrcAqjl**  
 acc genotypes **63**  
 peaks no back **12**  
 removed edges **30**  
 prop rem edges **0.208**

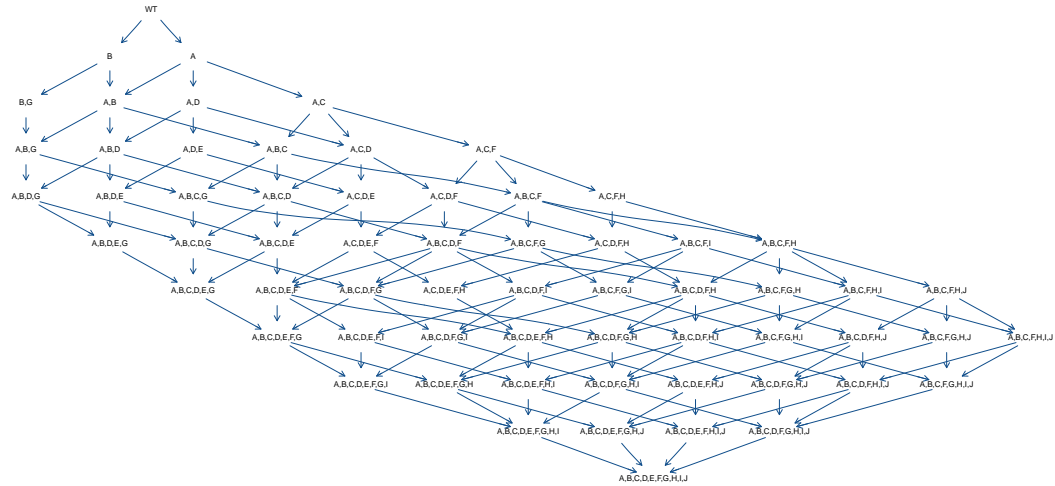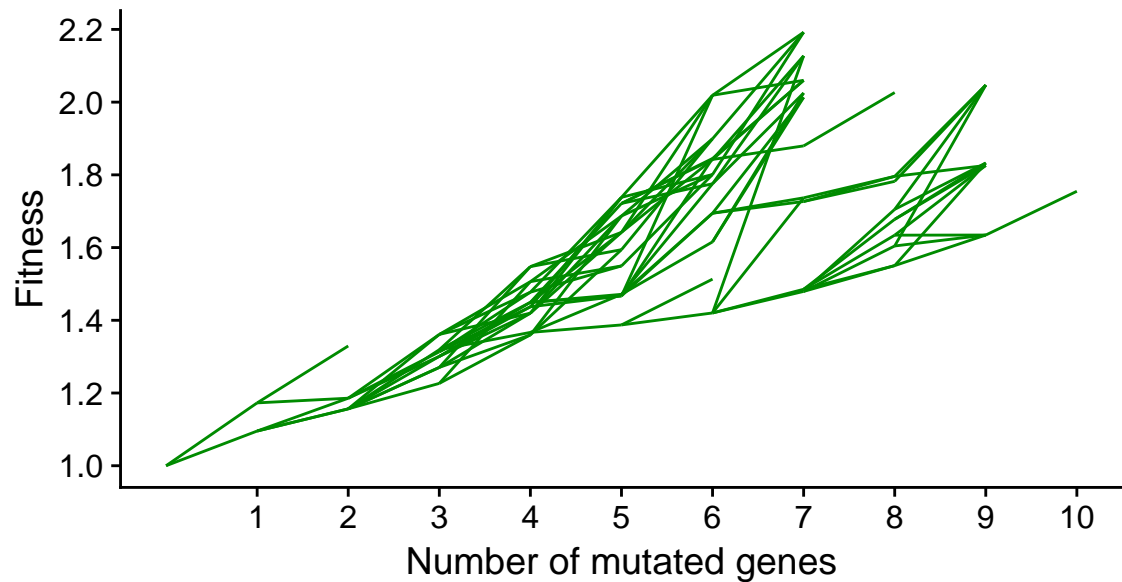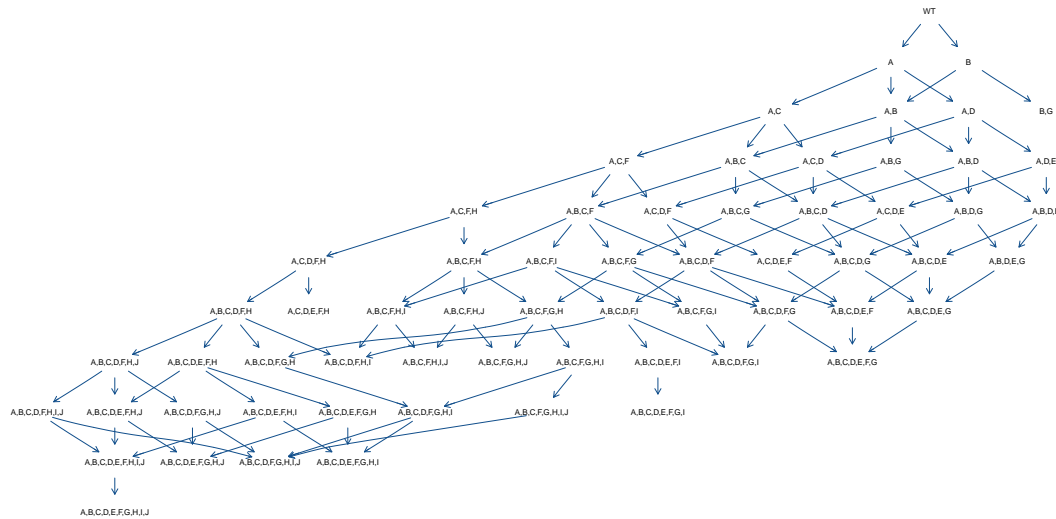

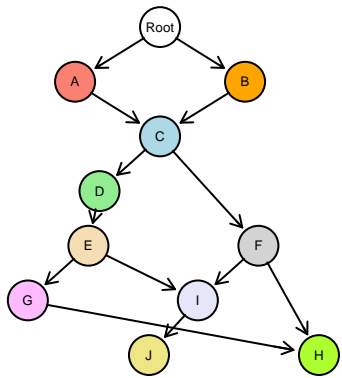

ID **t1yUXsv5fVuo10GRi**  
 acc genotypes **19**  
 peaks no back **2**  
 removed edges **2**  
 prop rem edges **0.077**

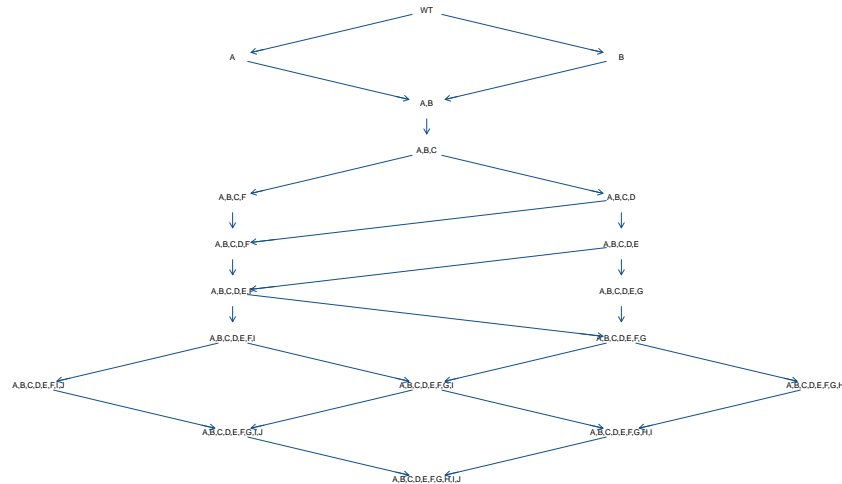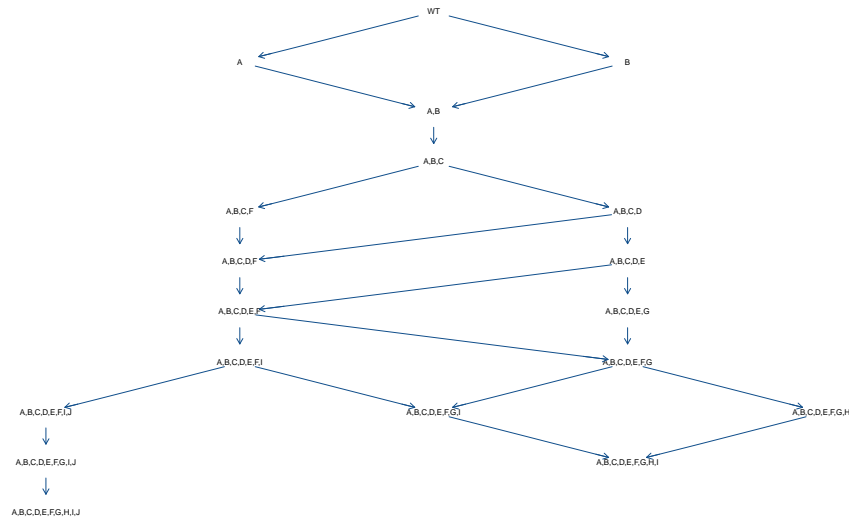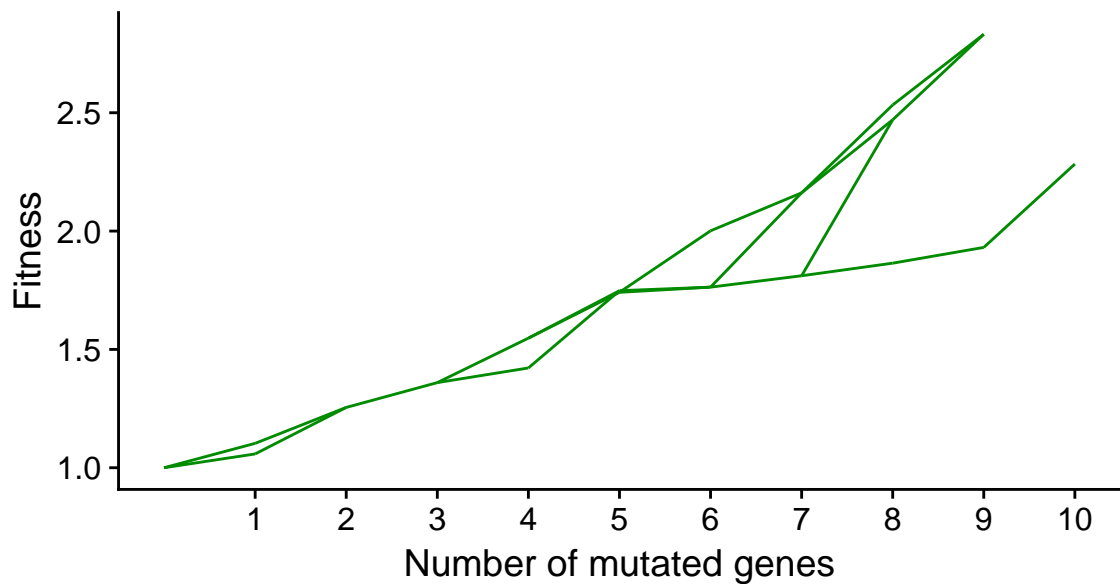



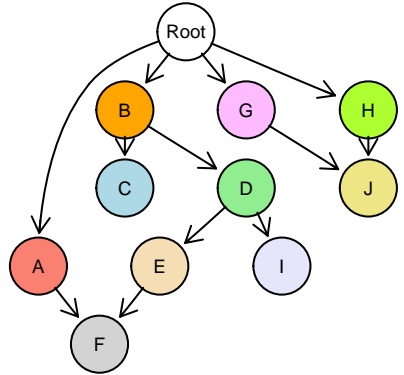

ID **tBuq3Z94BsQjawUL**  
 acc genotypes **130**  
 peaks no back **14**  
 removed edges **92**  
 prop rem edges **0.239**

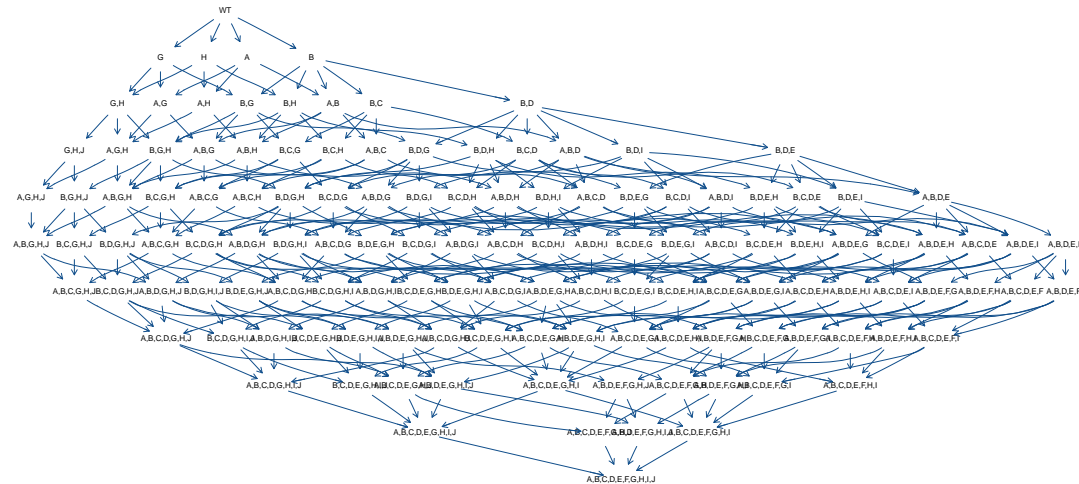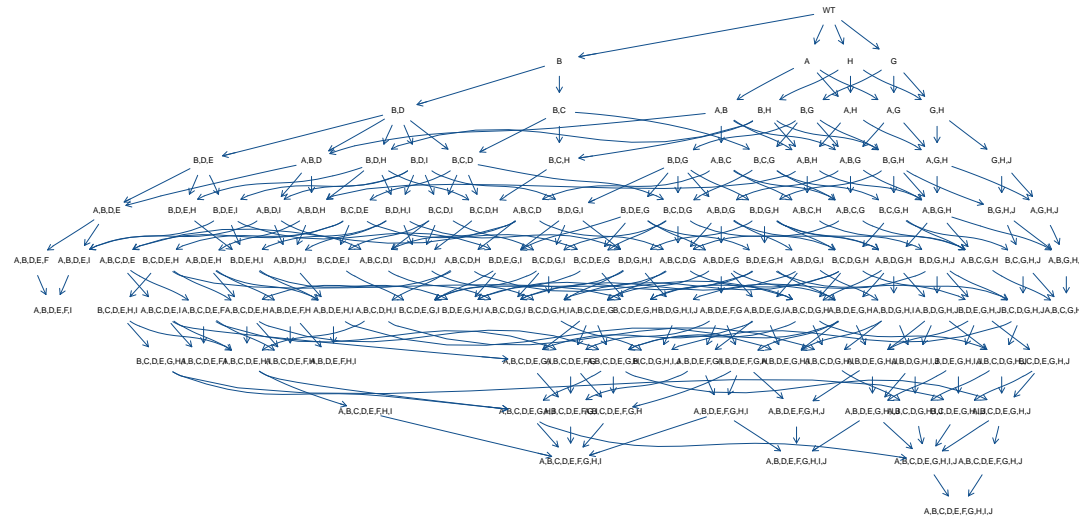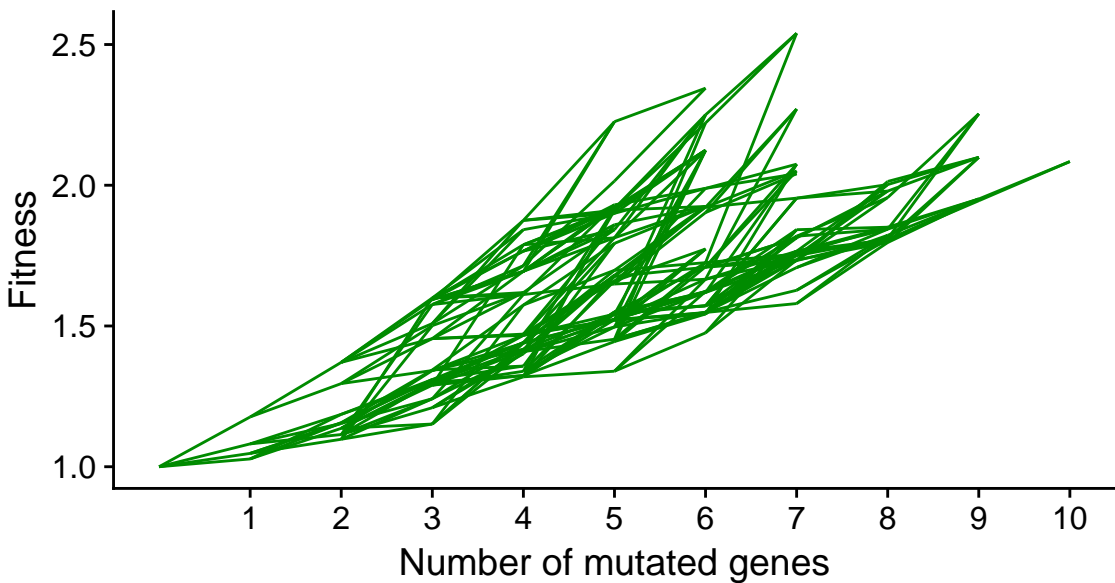

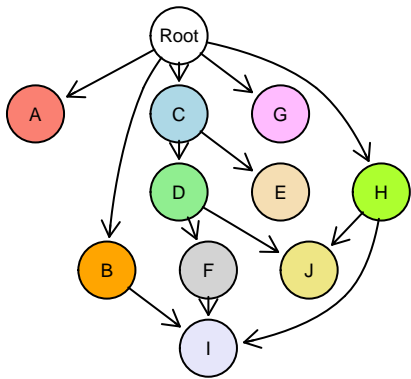

*ID* tGIKPZvUbRWHgDHV  
*acc genotypes* 160  
*peaks no back* 16  
*removed edges* 89  
*prop rem edges* 0.174

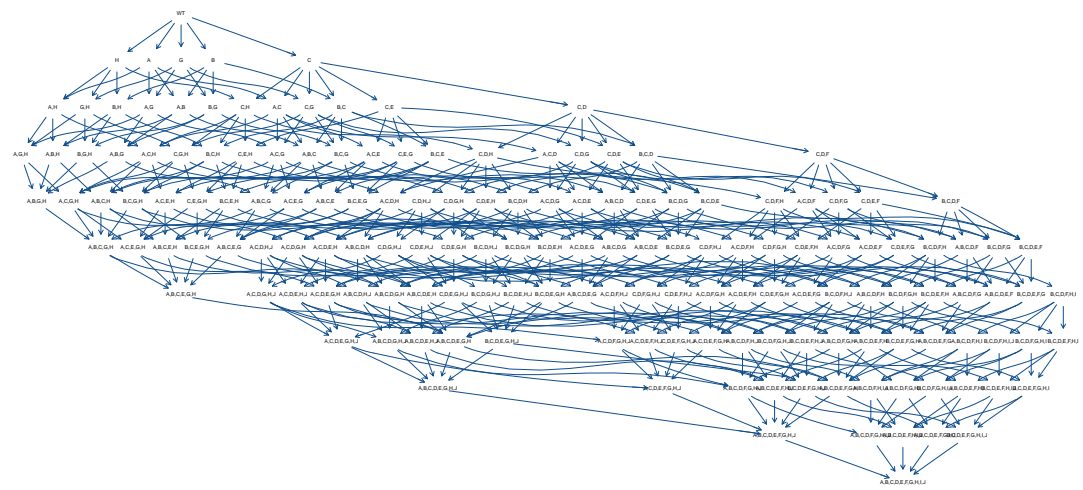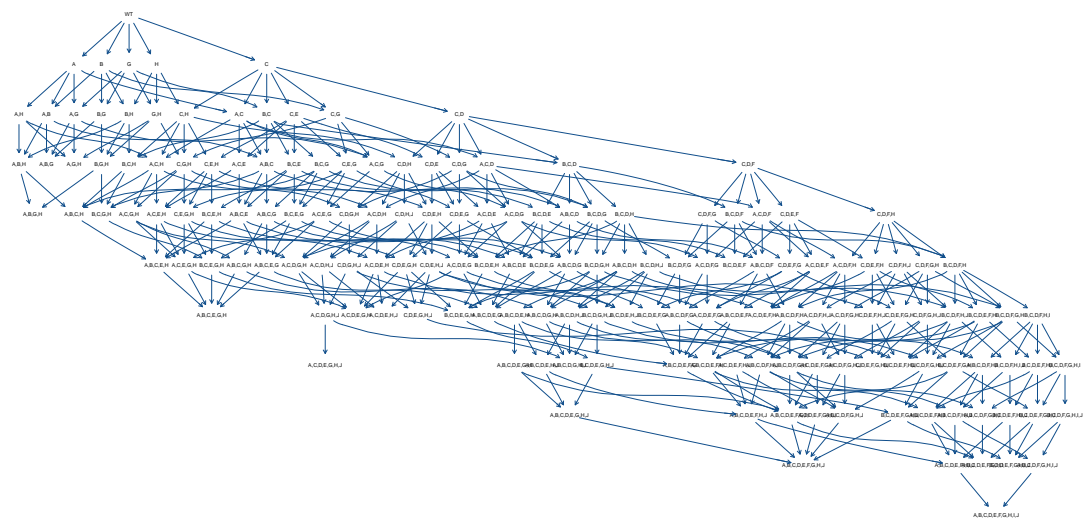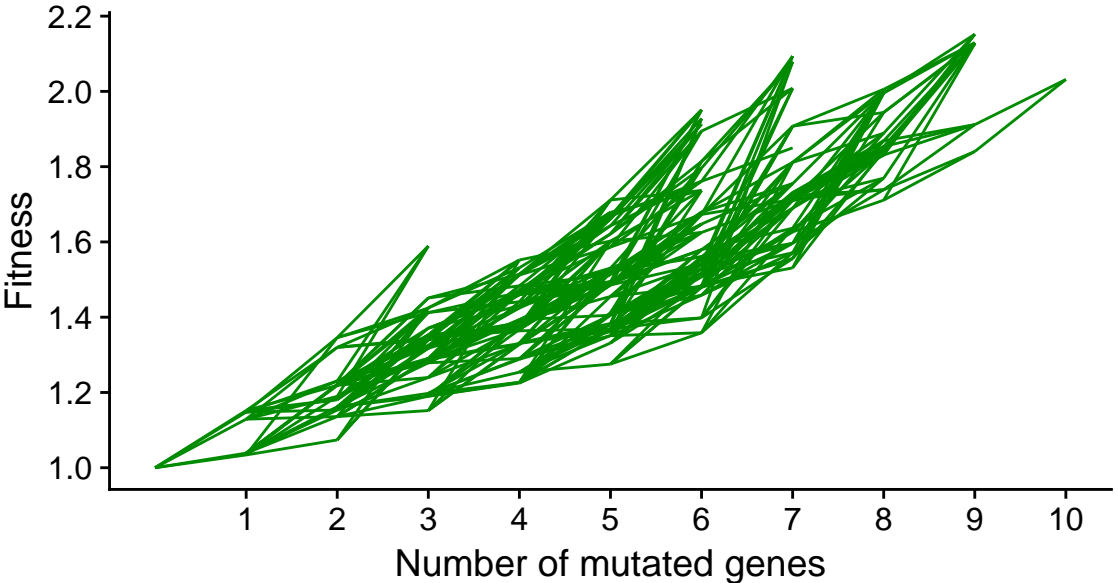

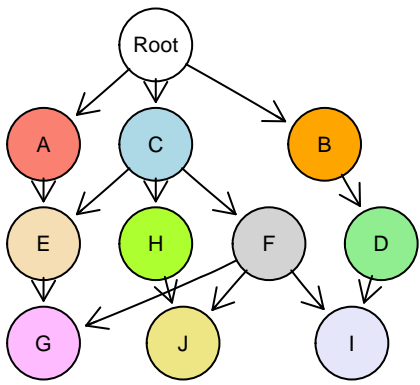

ID **TGzeGSf7DK40TwG2**  
 acc genotypes **72**  
 peaks no back **8**  
 removed edges **32**  
 prop rem edges **0.19**

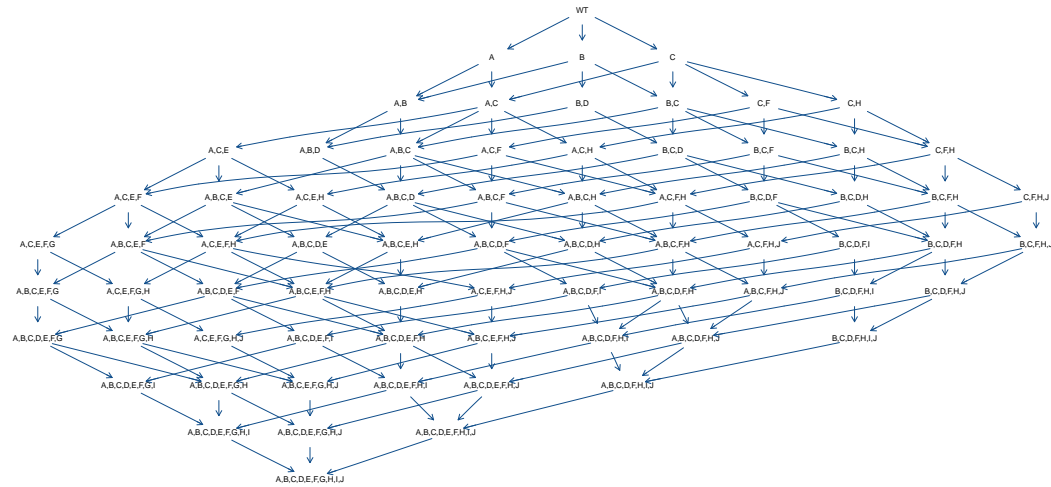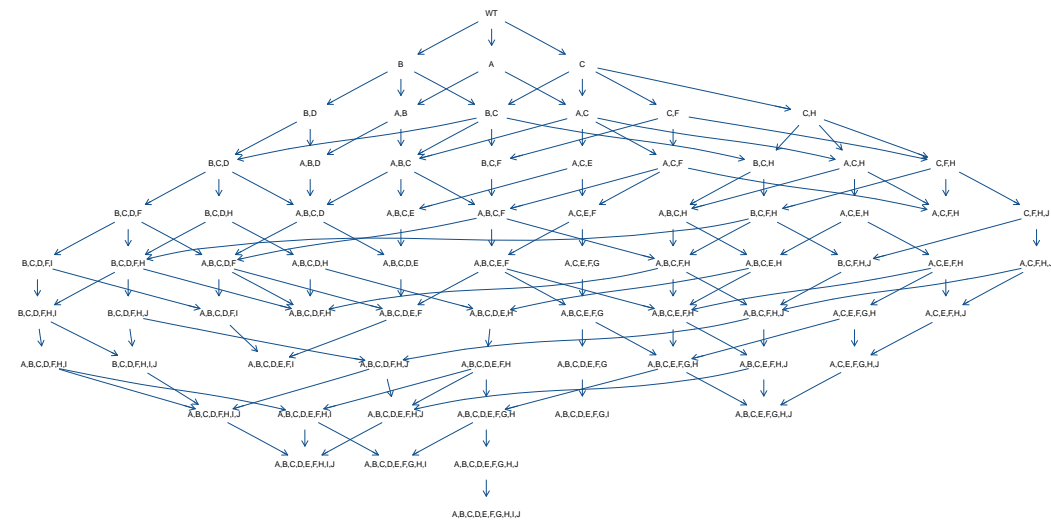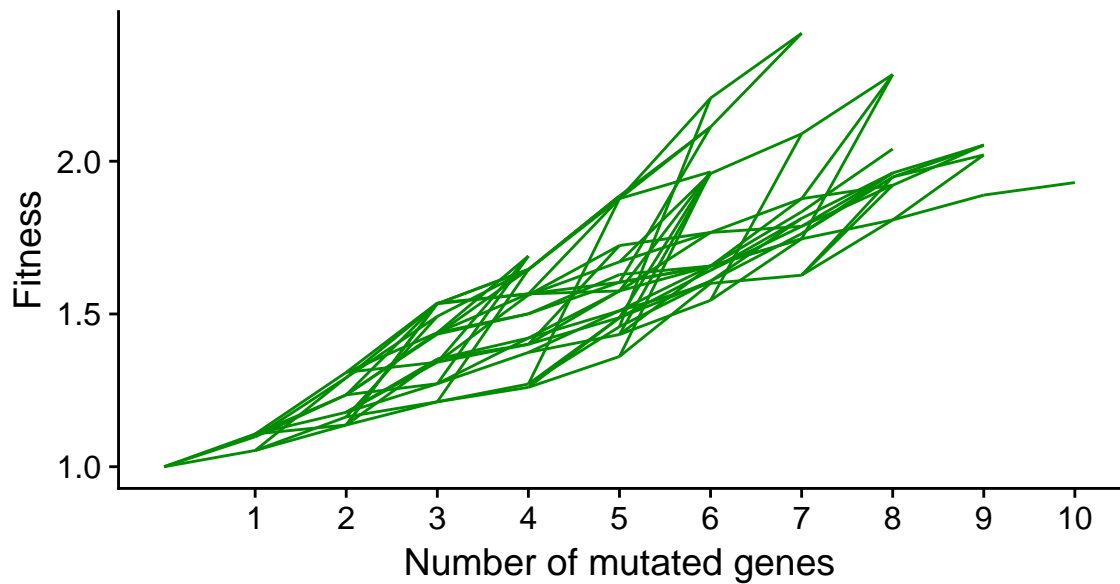

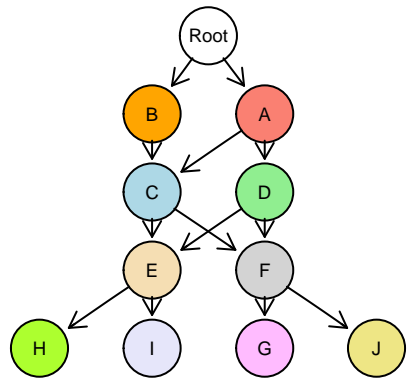

ID **tl8GpDHXTWuBAEB4**  
 acc genotypes **32**  
 peaks no back **6**  
 removed edges **11**  
 prop rem edges **0.183**

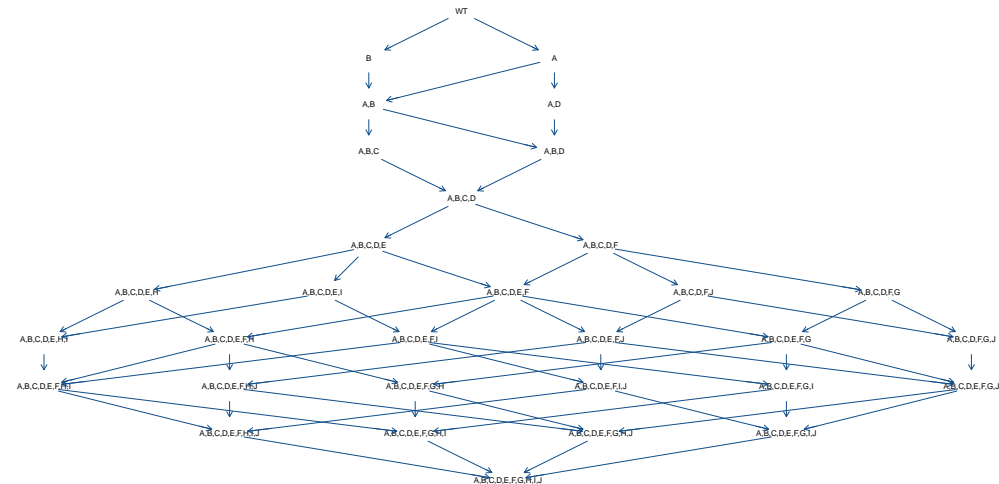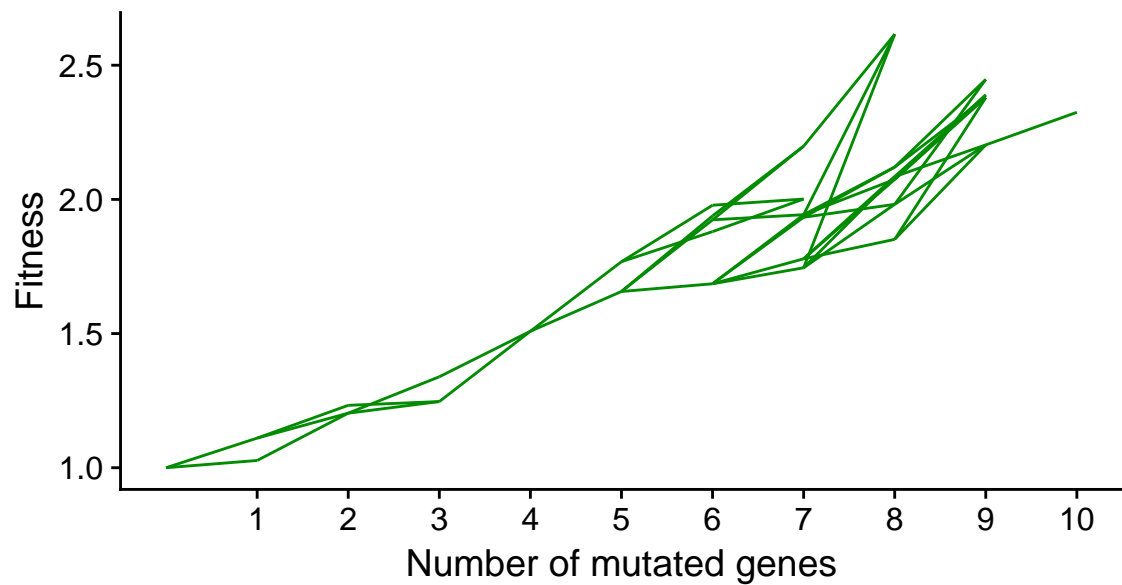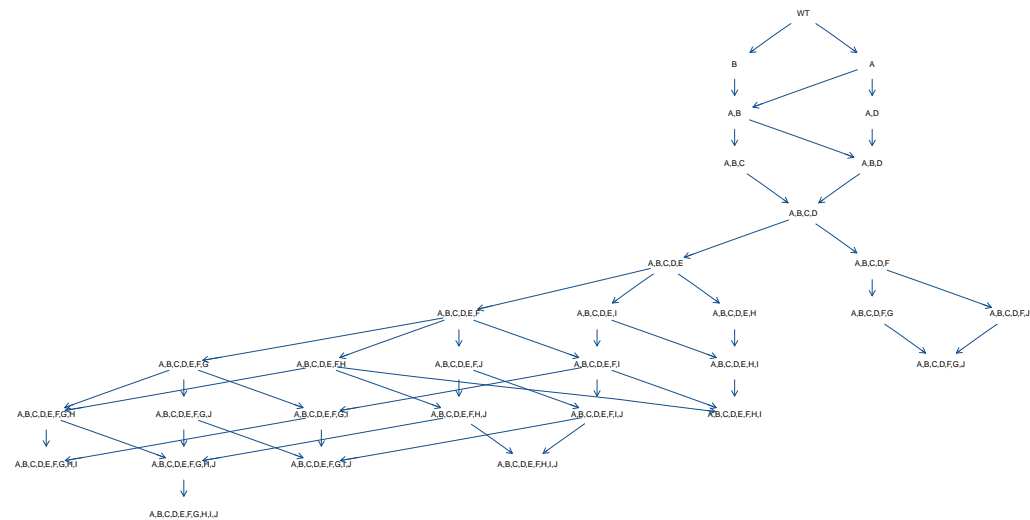

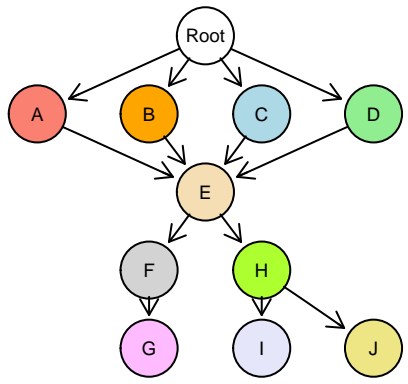

ID TnFE10L2B9qFy8hMT  
 acc genotypes 31  
 peaks no back 5  
 removed edges 8  
 prop rem edges 0.138

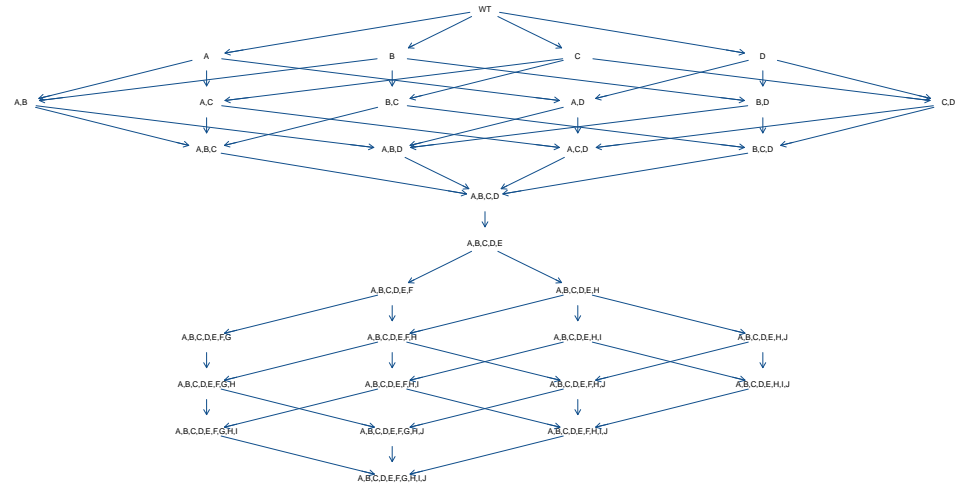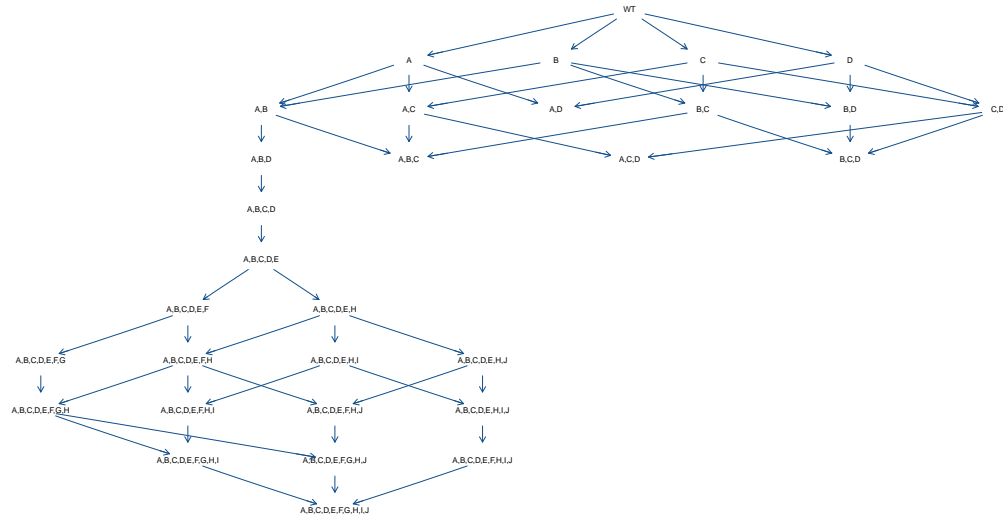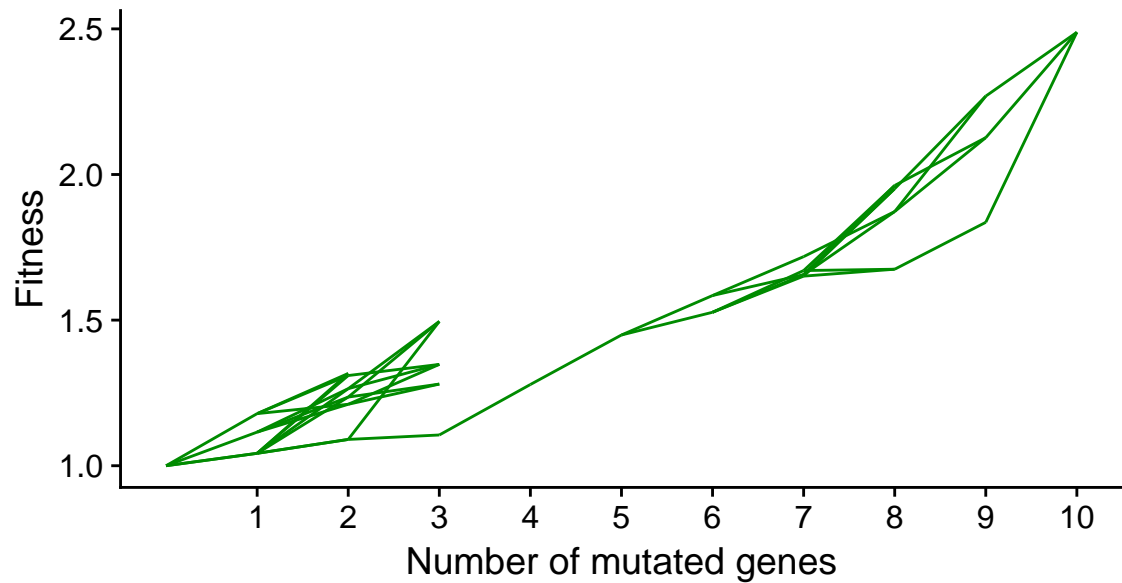

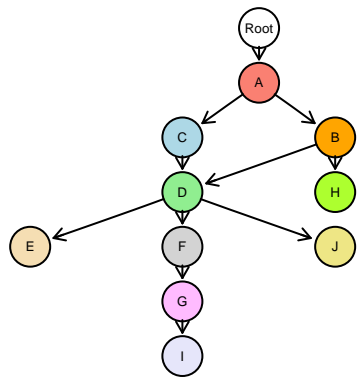

ID **ToRaV610sJqVtMv2b**  
 acc genotypes **39**  
 peaks no back **7**  
 removed edges **14**  
 prop rem edges **0.171**

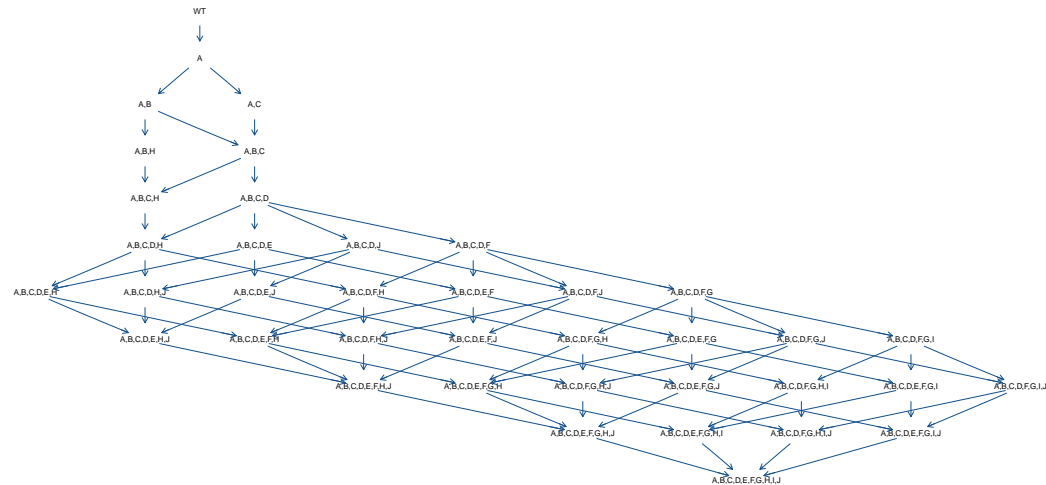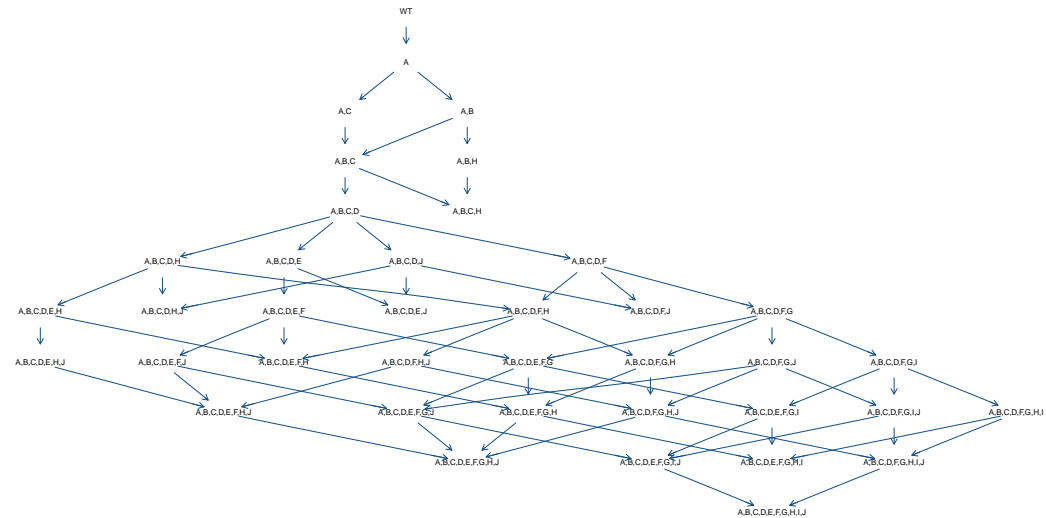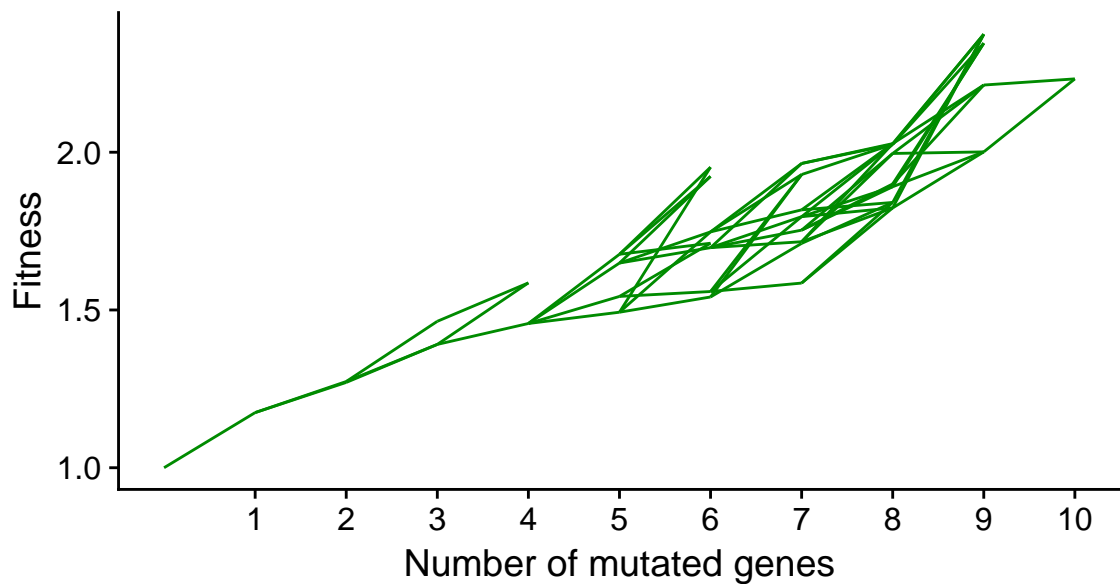

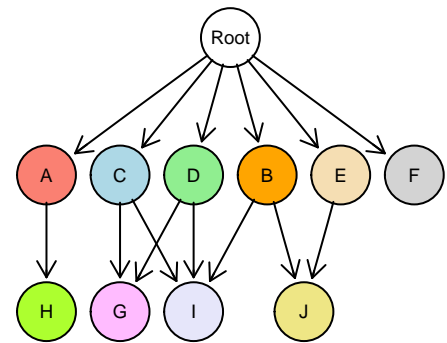

*ID* TQnQiOlfxYRUpqrU  
*acc genotypes* 186  
*peaks no back* 13  
*removed edges* 112  
*prop rem edges* 0.188

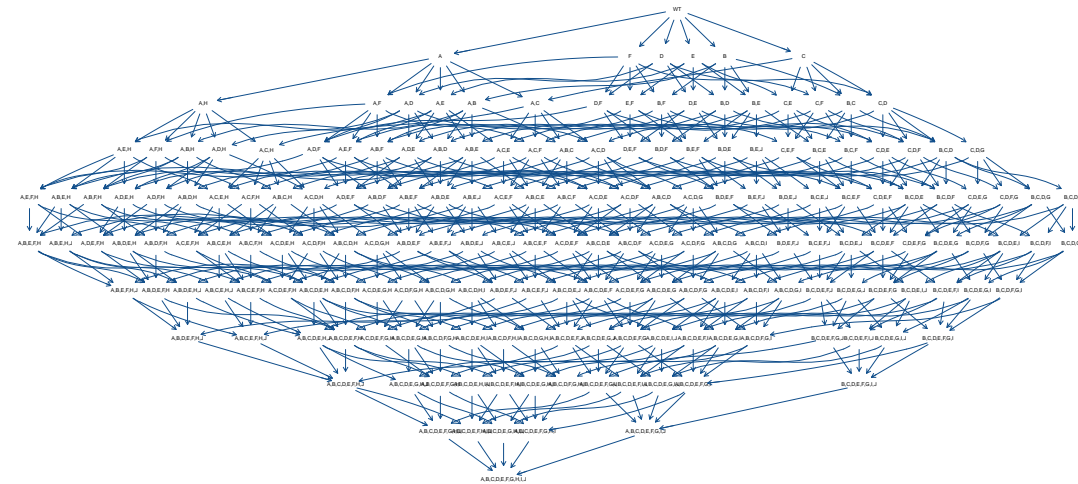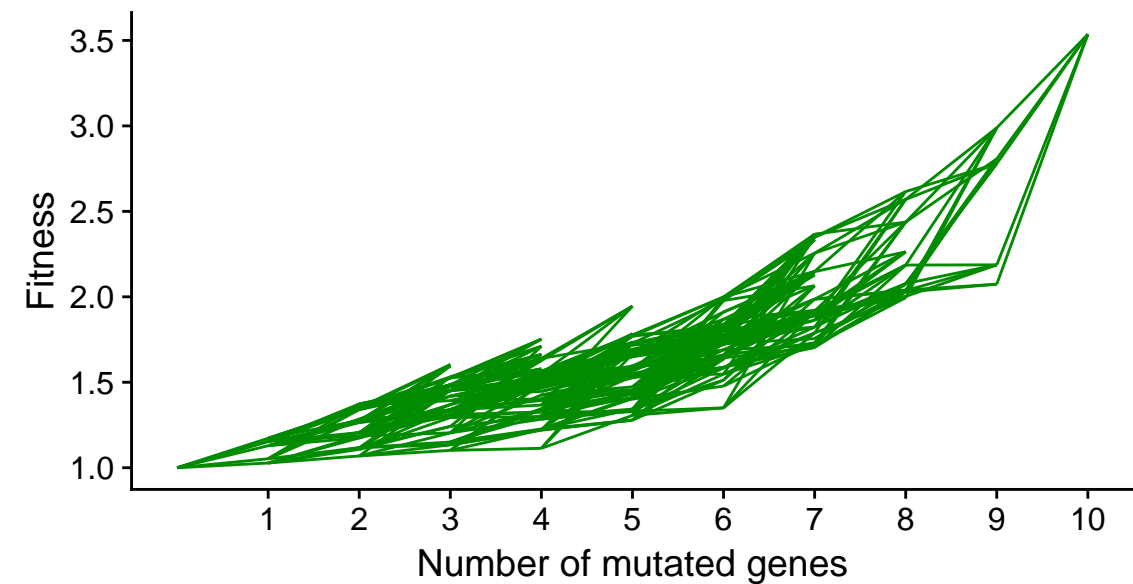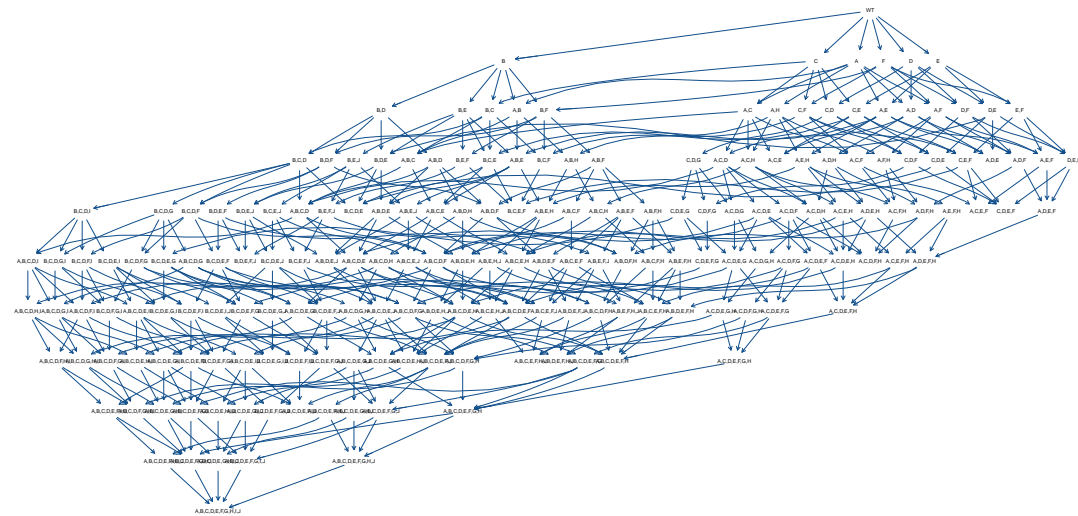

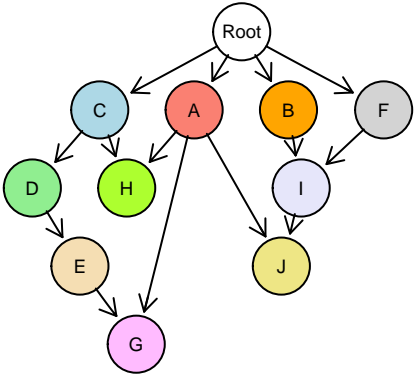

ID TVG98obaysdZVe7G  
 acc genotypes 74  
 peaks no back 8  
 removed edges 33  
 prop rem edges 0.189

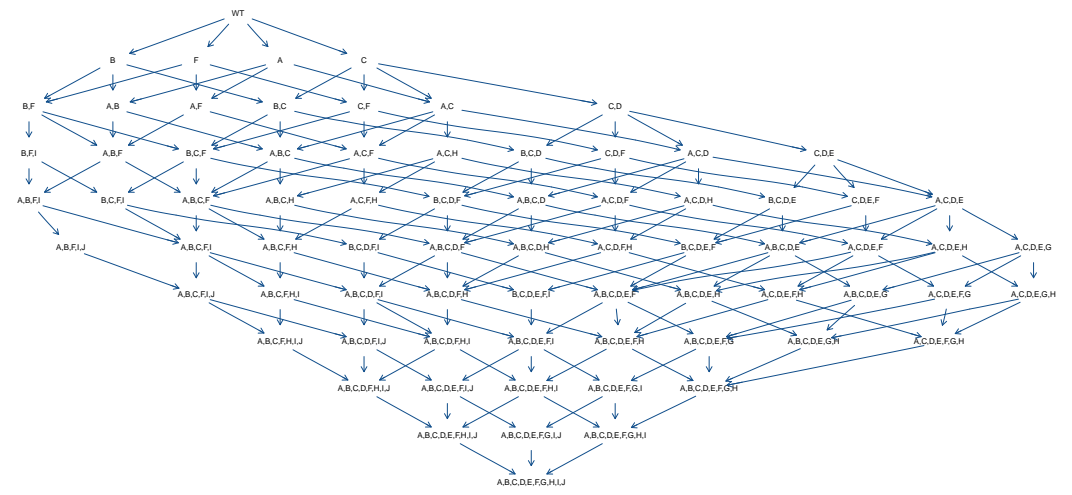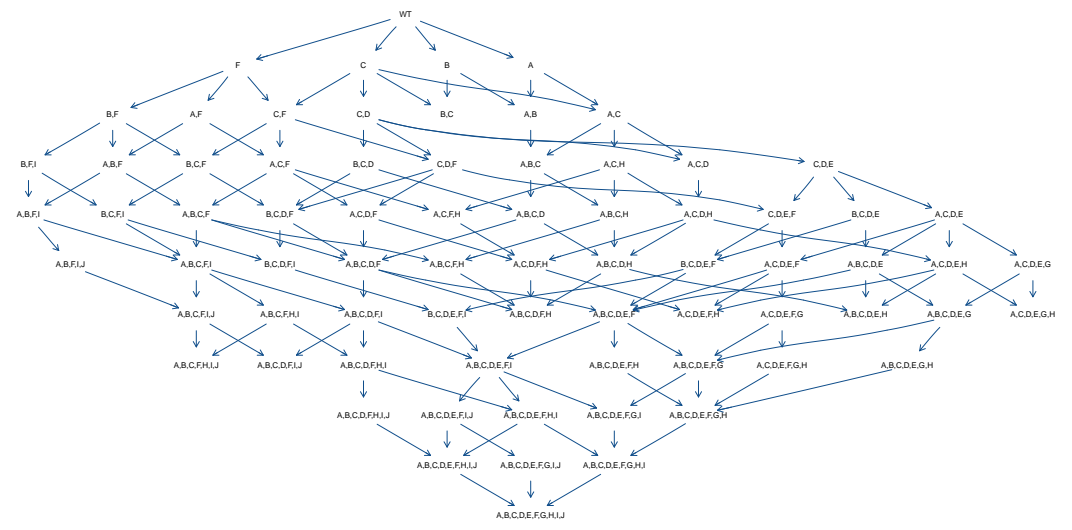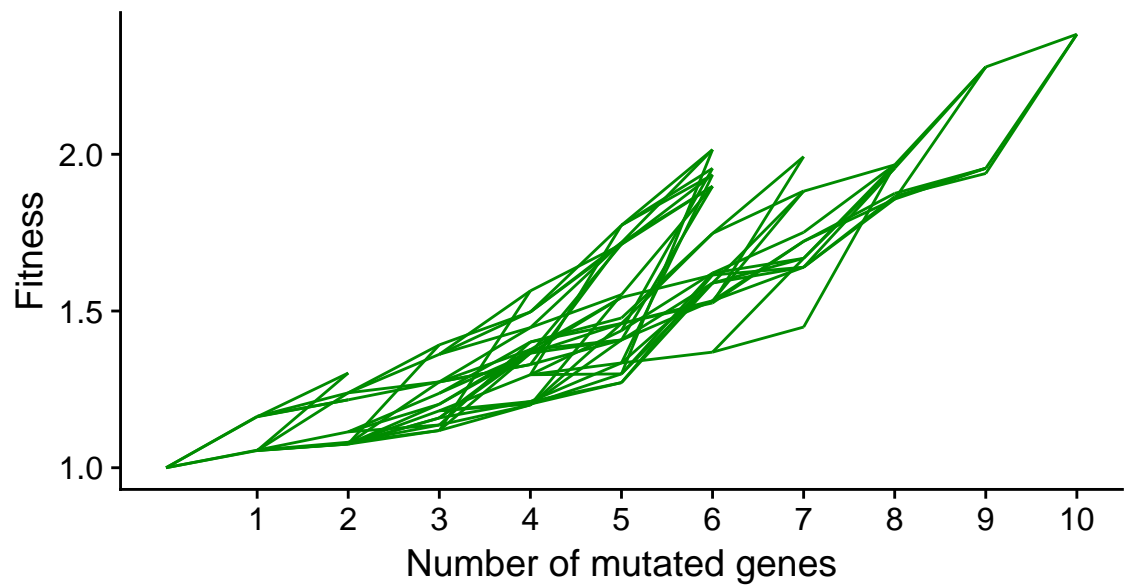



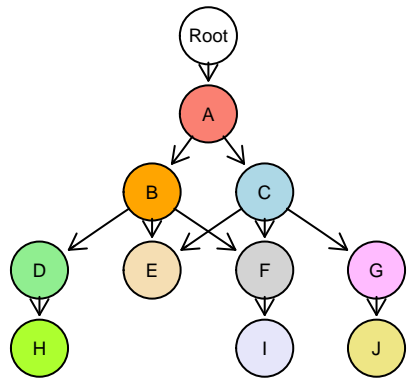

ID **tytbSnHlzi26177A**  
 acc genotypes **62**  
 peaks no back **7**  
 removed edges **18**  
 prop rem edges **0.122**

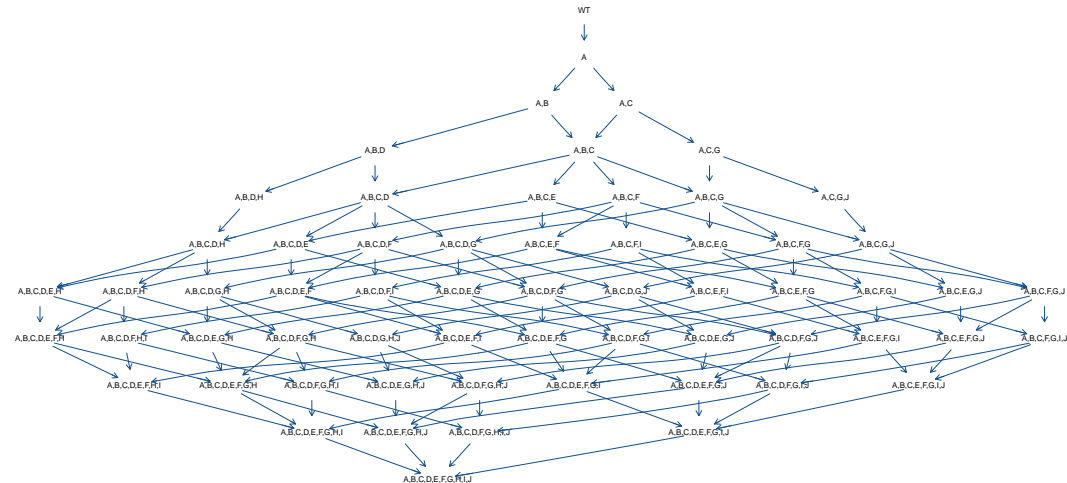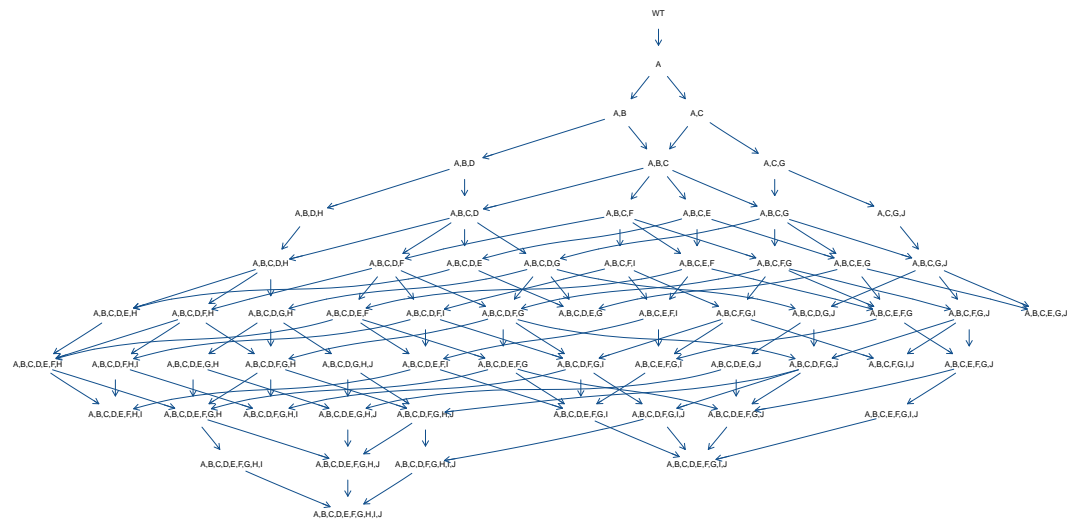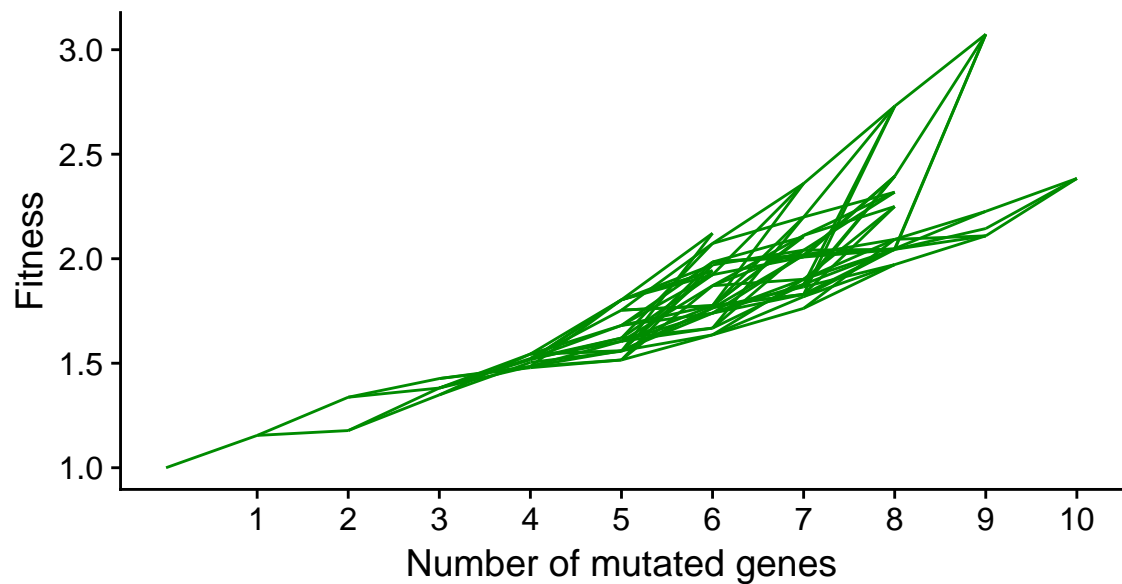

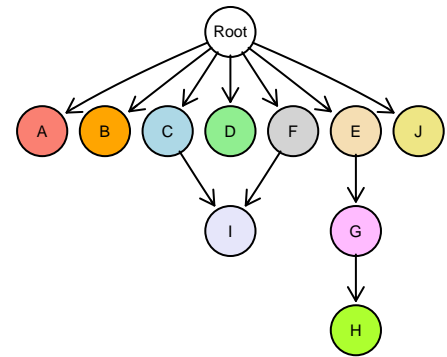

|                       |                  |
|-----------------------|------------------|
| <i>ID</i>             | TZFzcsBmlMqGXCih |
| <i>acc genotypes</i>  | 320              |
| <i>peaks no back</i>  | 22               |
| <i>removed edges</i>  | 231              |
| <i>prop rem edges</i> | 0.192            |

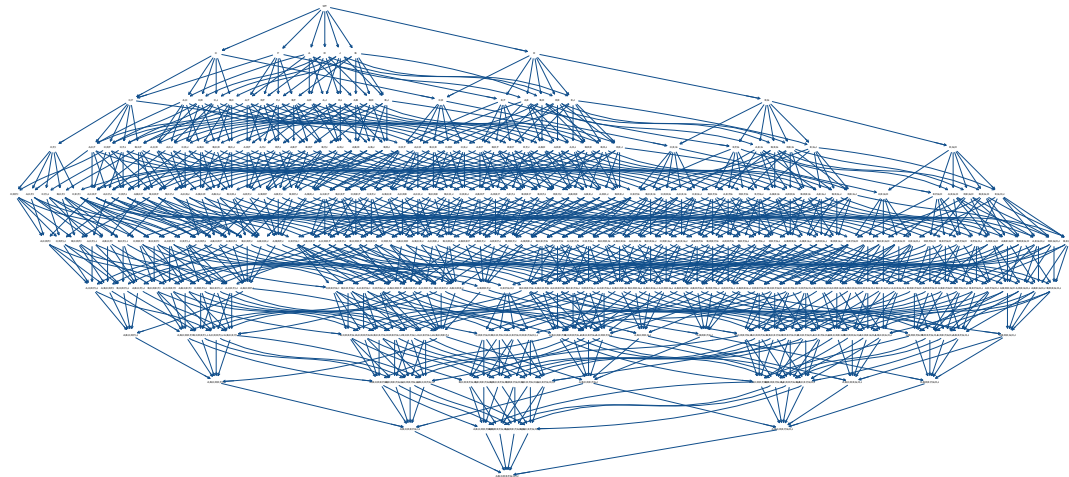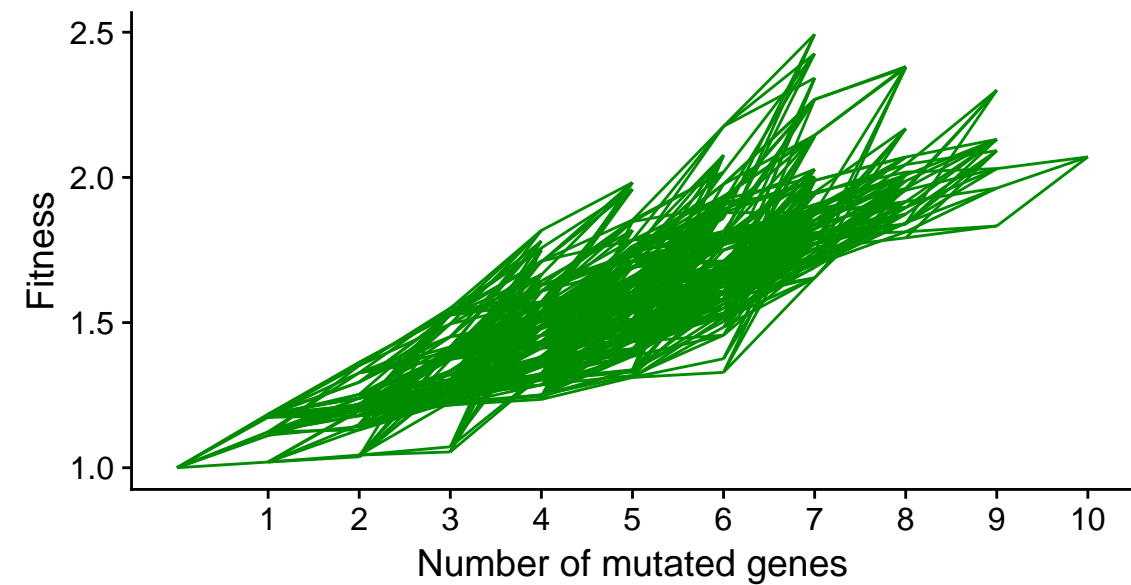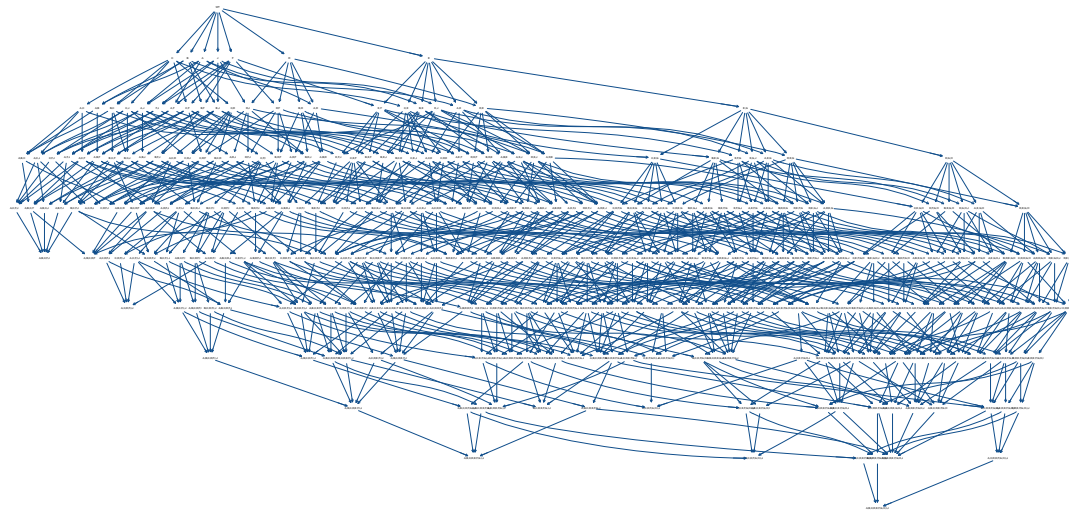

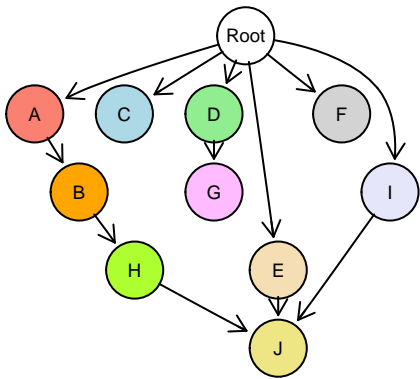

ID UBKJVjkEIEDOKL7t  
 acc genotypes 204  
 peaks no back 14  
 removed edges 117  
 prop rem edges 0.17

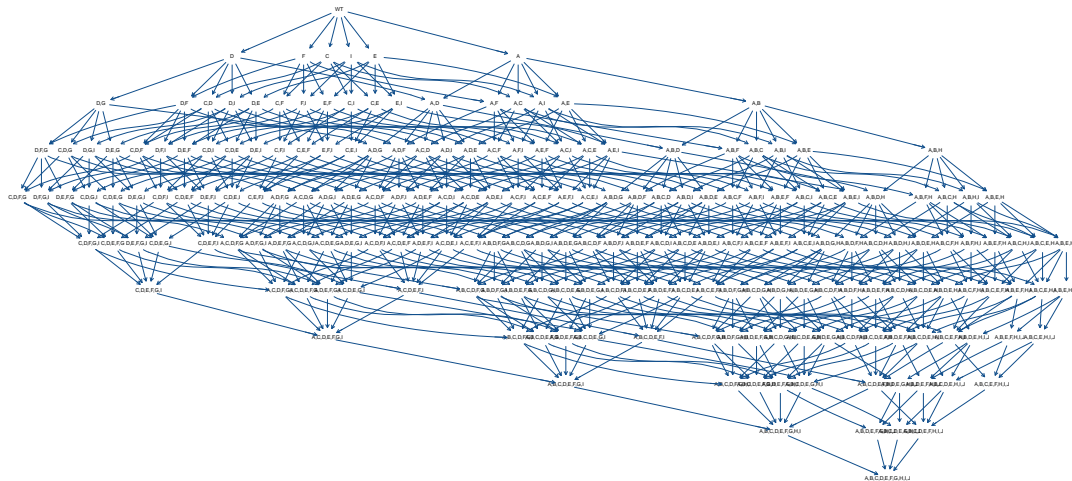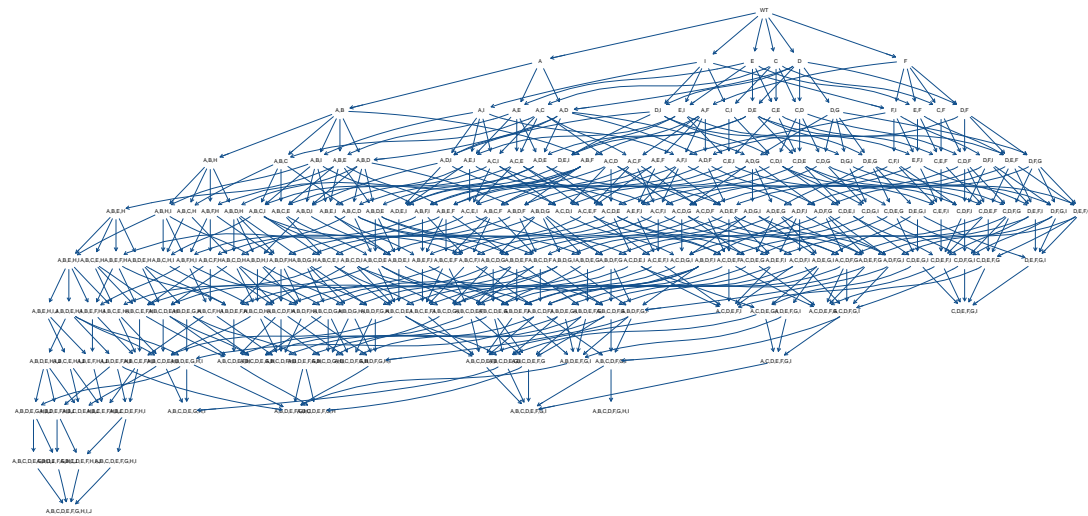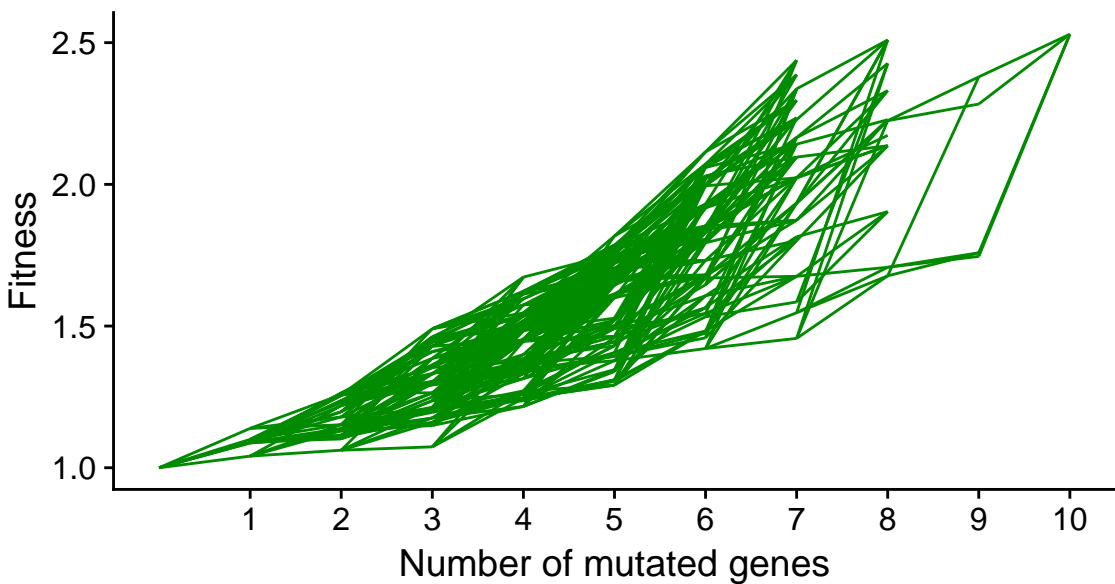

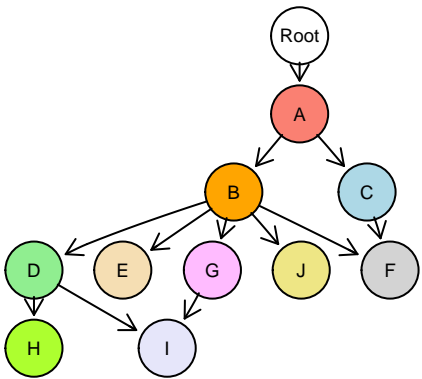

*ID* Ue10Y3AbLFXoQDQkX  
*acc genotypes* 99  
*peaks no back* 13  
*removed edges* 62  
*prop rem edges* 0.218

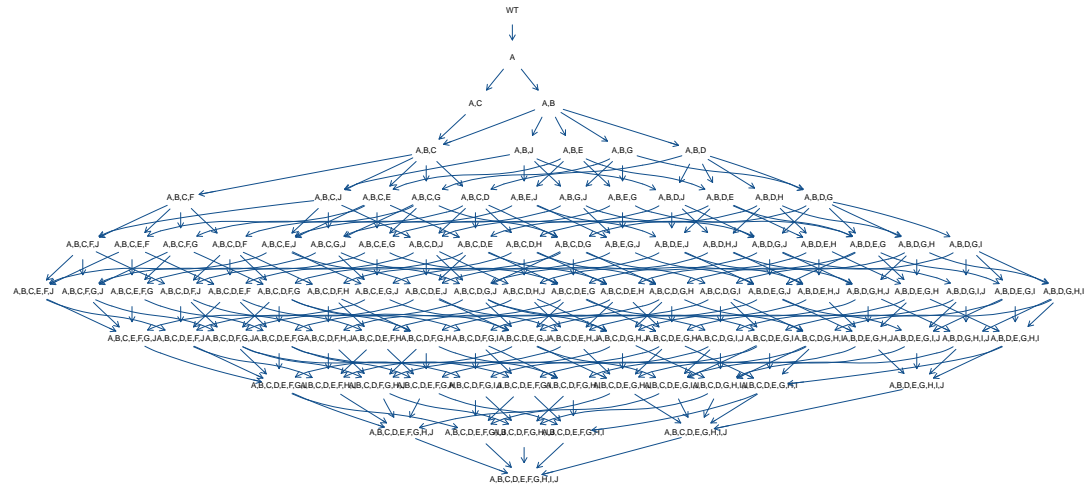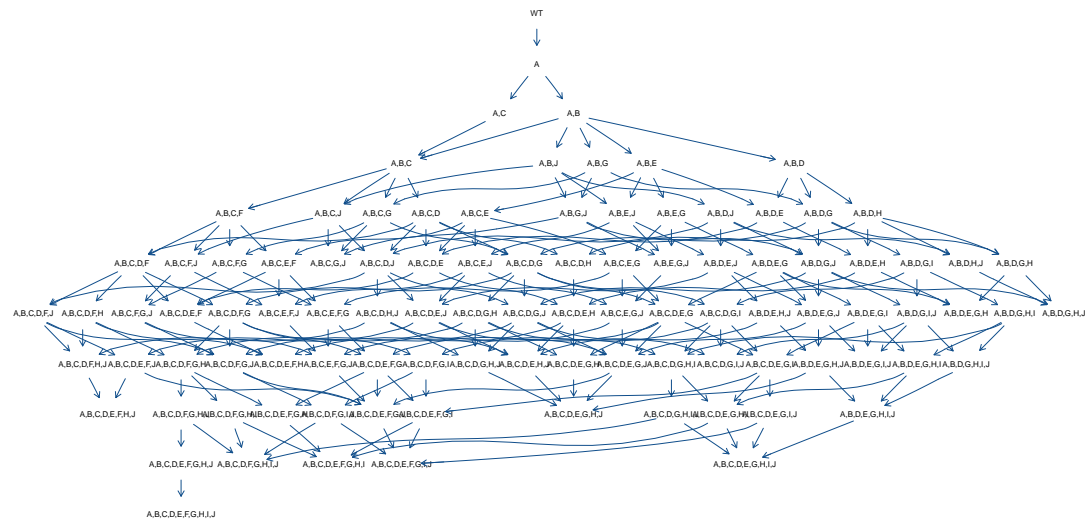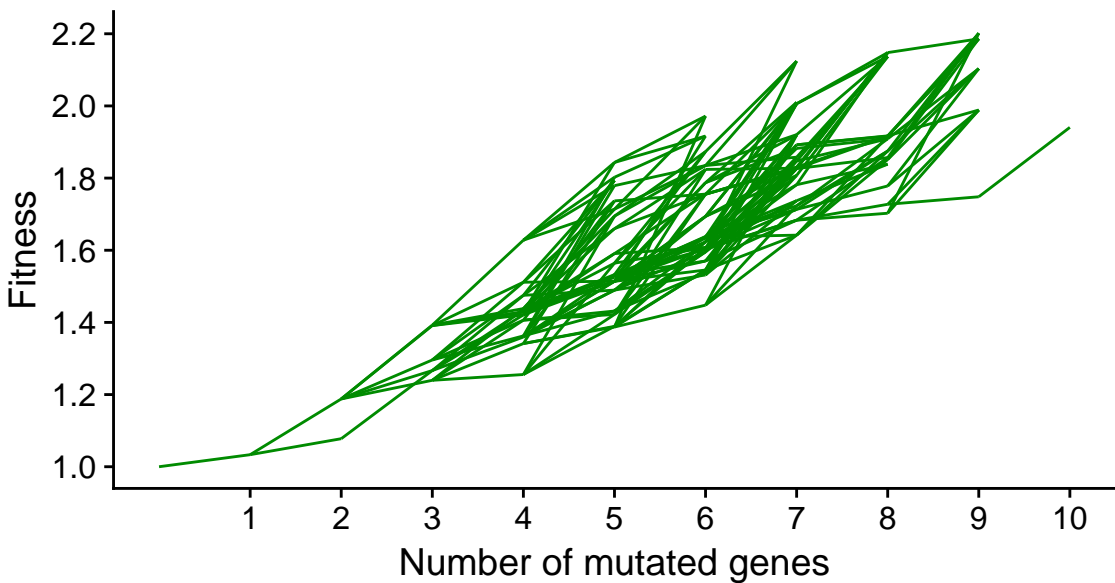

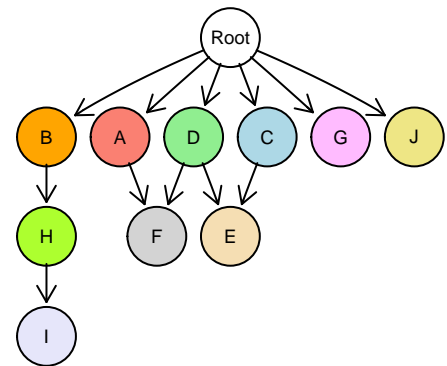

ID **UEcQih9YNrZ2uptX**  
 acc genotypes **208**  
 peaks no back **18**  
 removed edges **127**  
 prop rem edges **0.186**

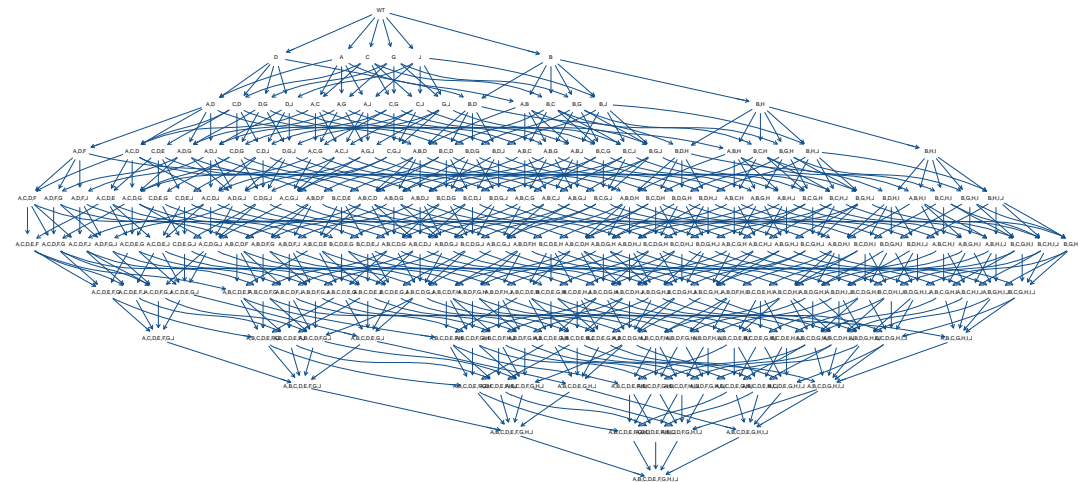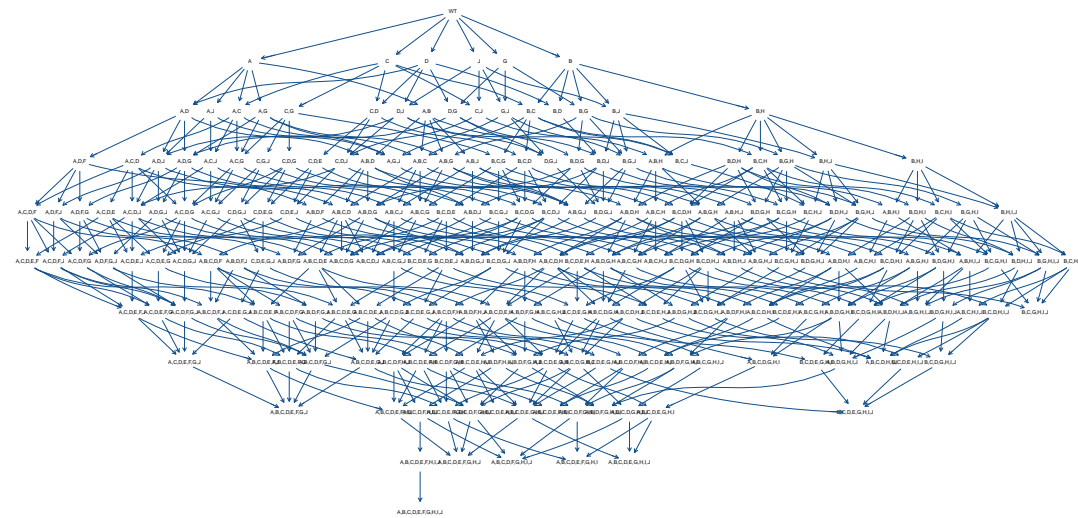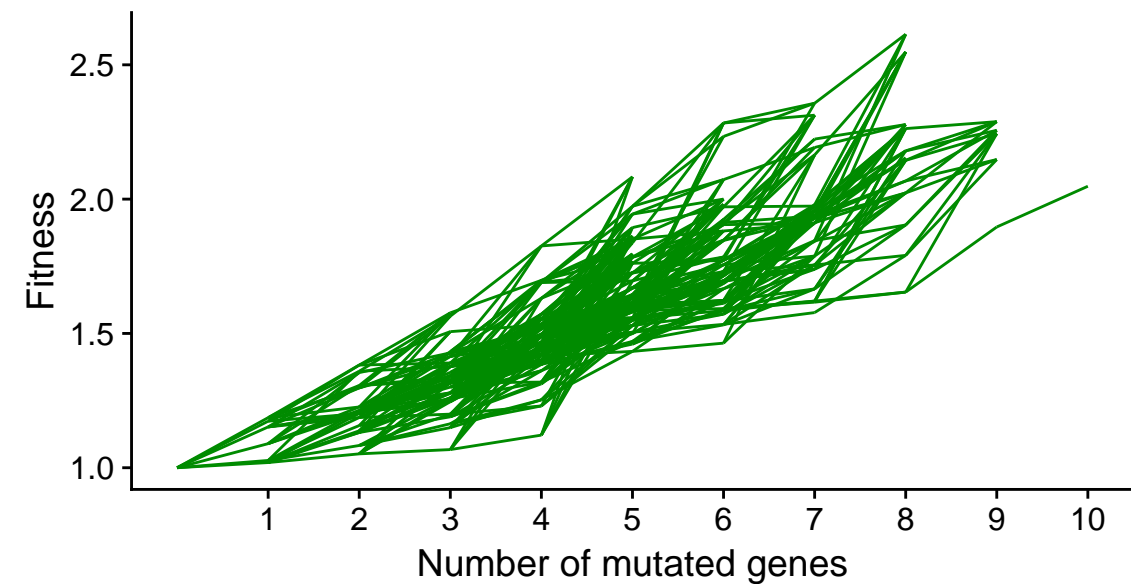

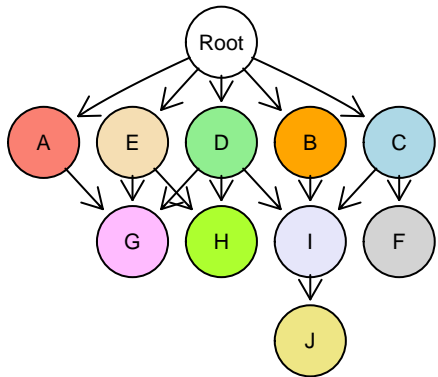

ID UHMlcOOkS2hFJbTg  
 acc genotypes 104  
 peaks no back 10  
 removed edges 51  
 prop rem edges 0.182

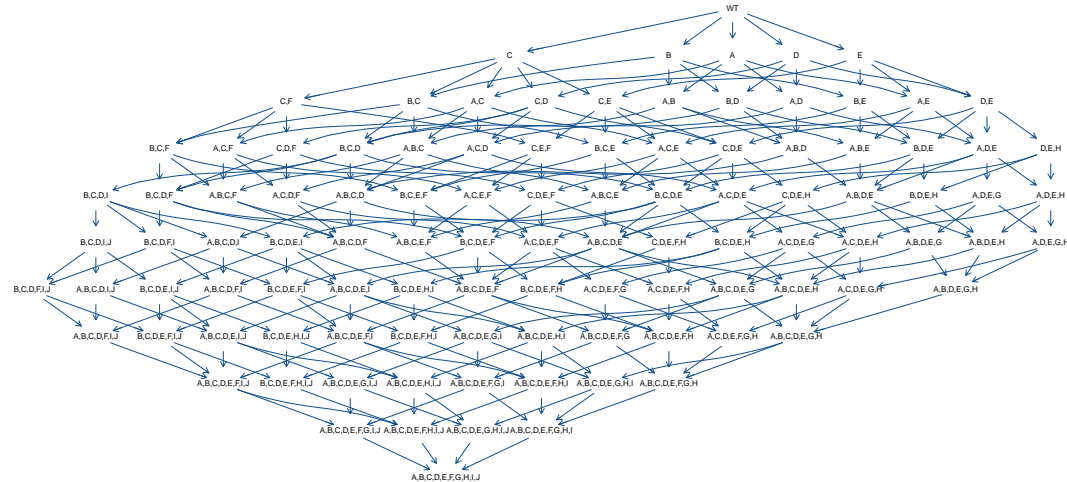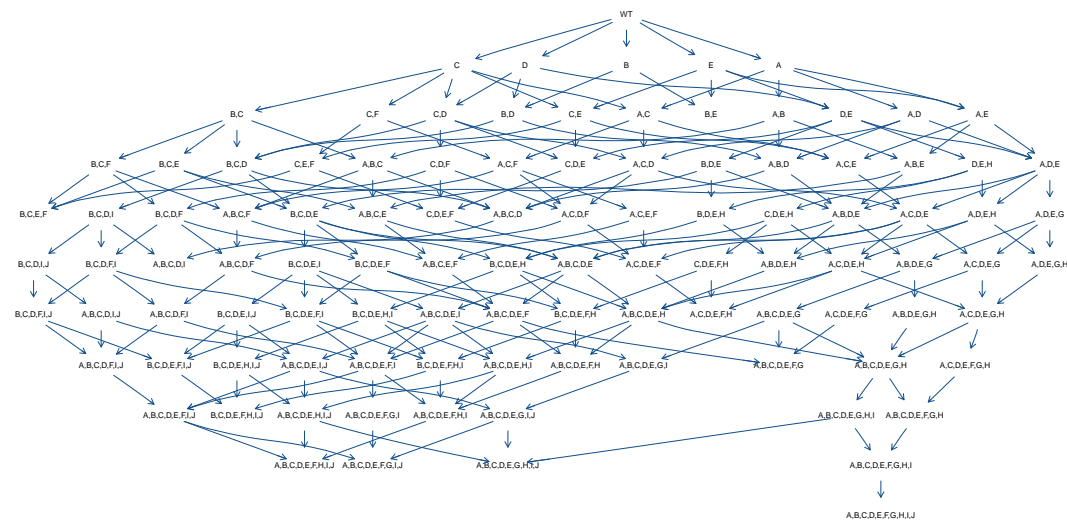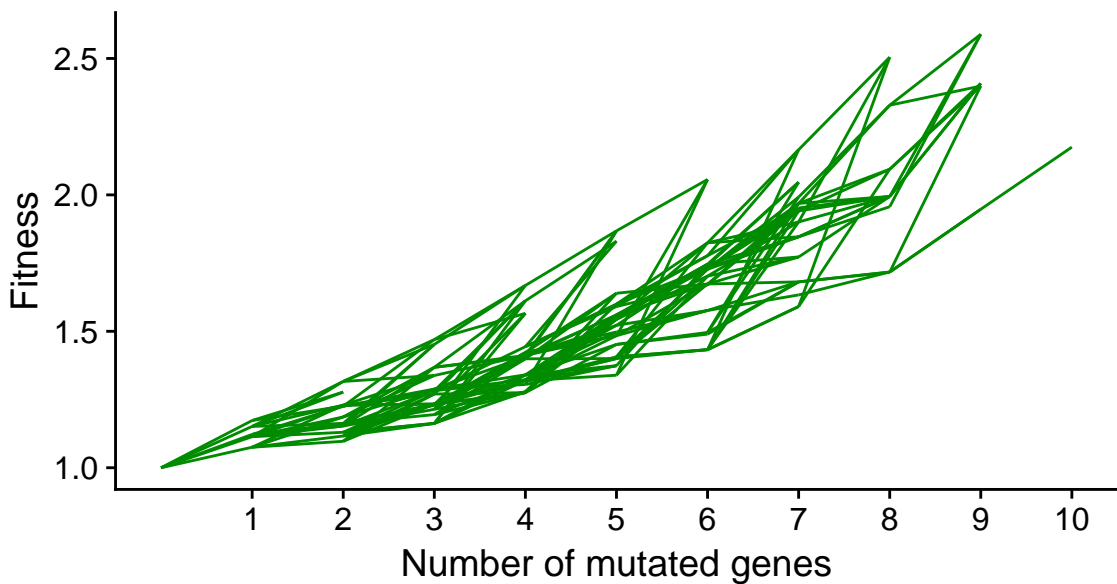

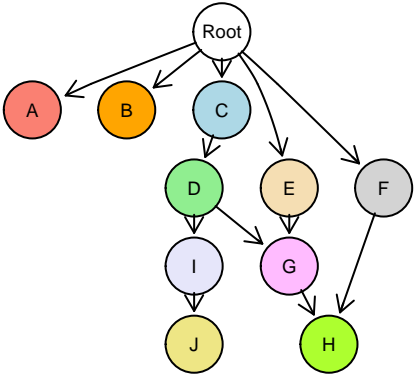

ID **uKmhMNcyKeLI3N10d**  
 acc genotypes **116**  
 peaks no back **12**  
 removed edges **59**  
 prop rem edges **0.178**

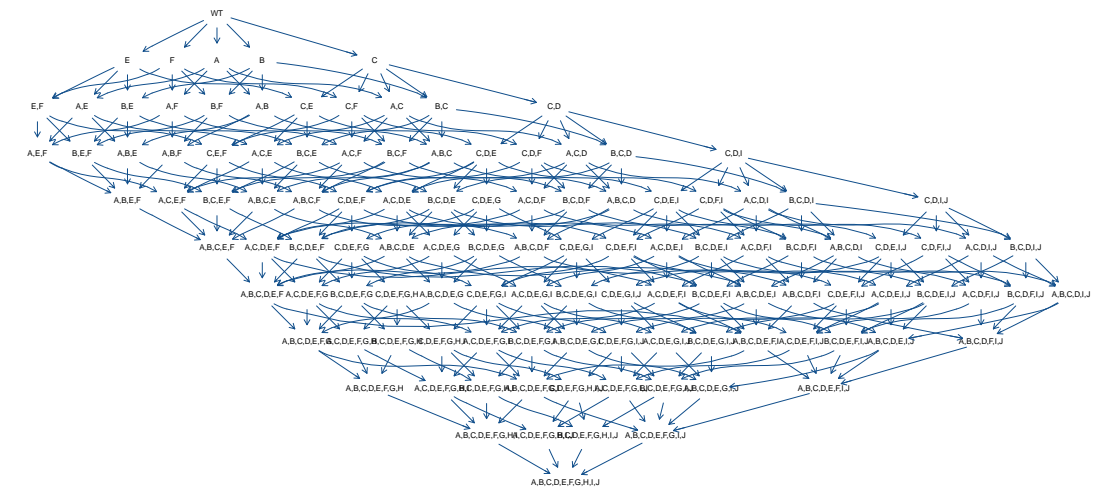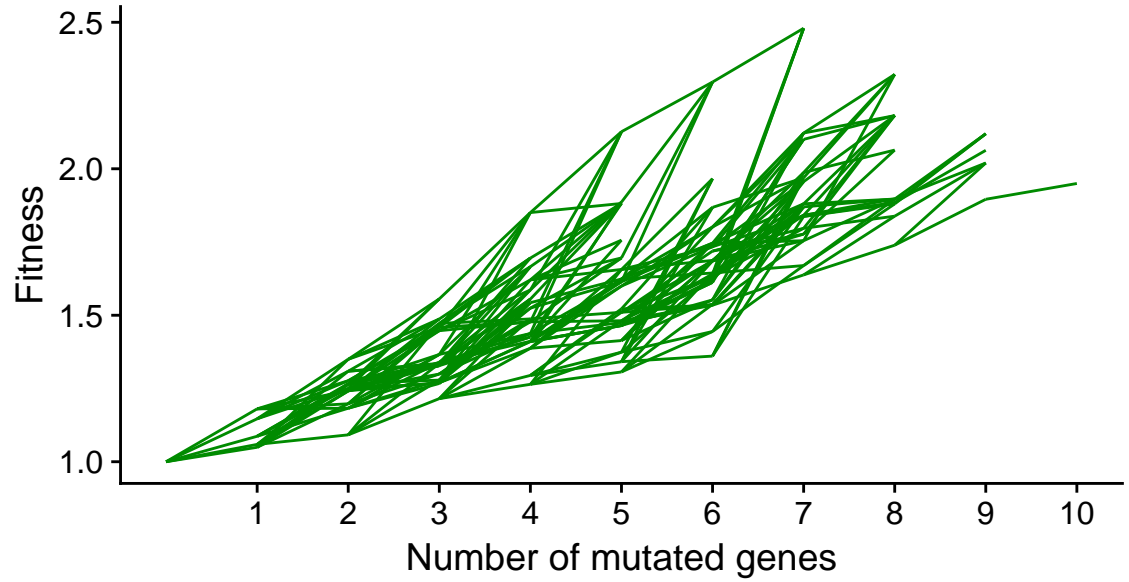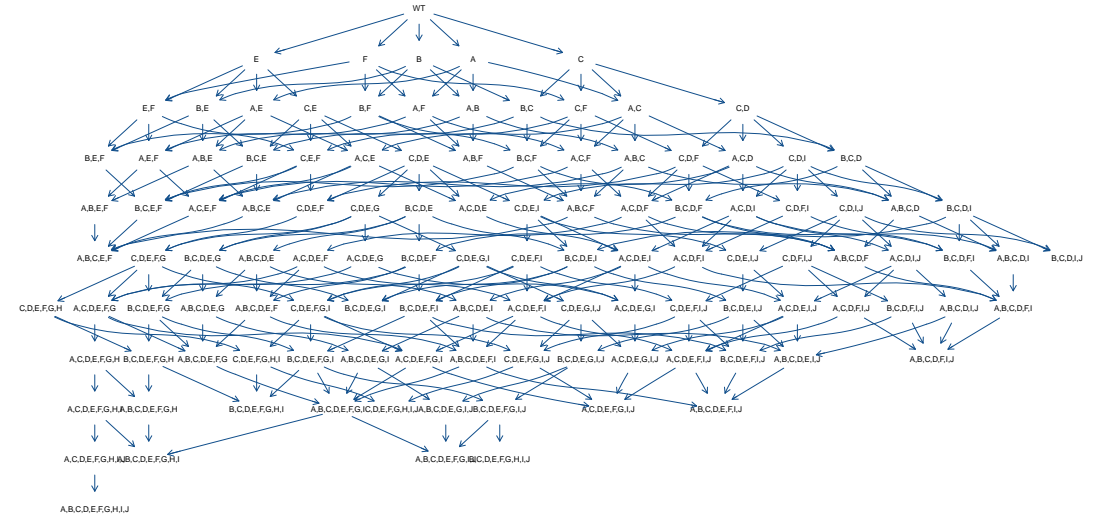

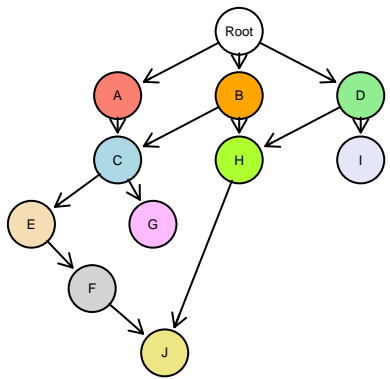

ID UoHyw1GDeCOAnn4H  
 acc genotypes 50  
 peaks no back 6  
 removed edges 23  
 prop rem edges 0.217

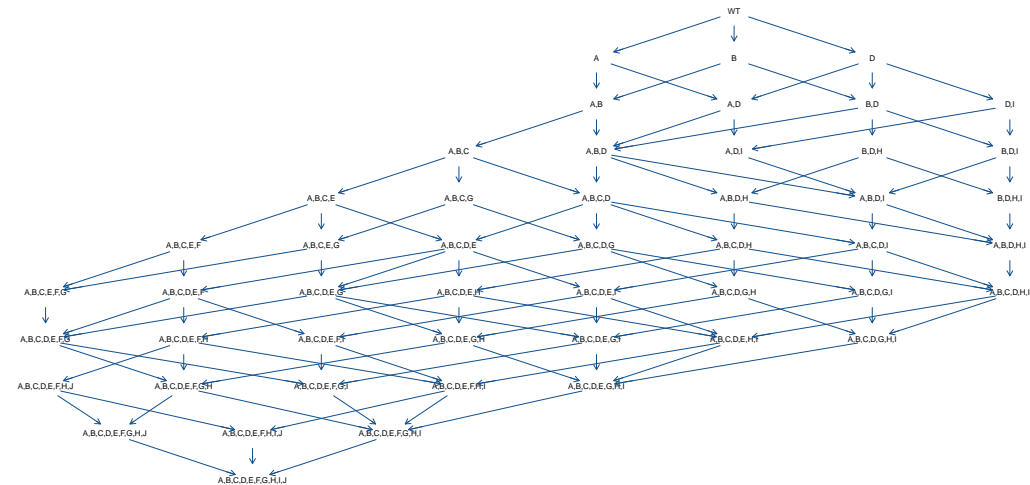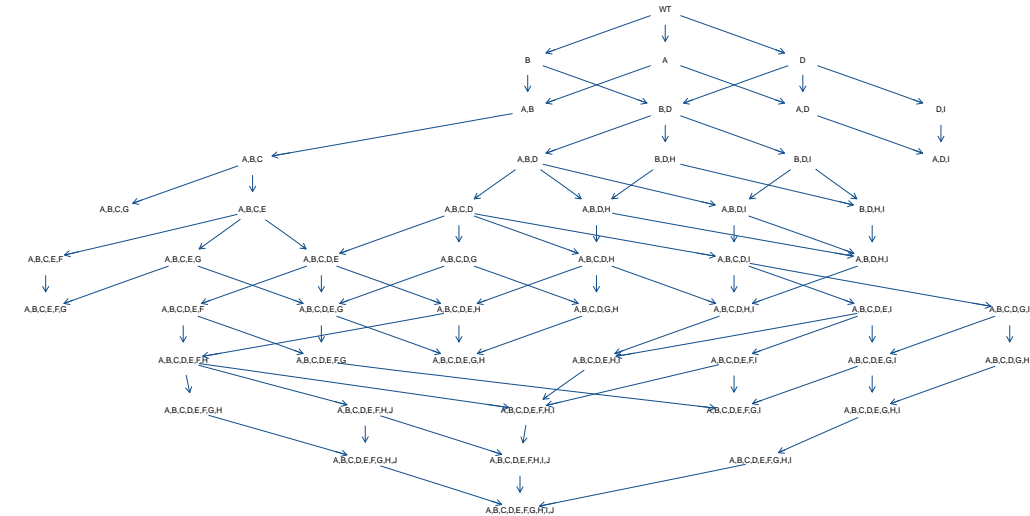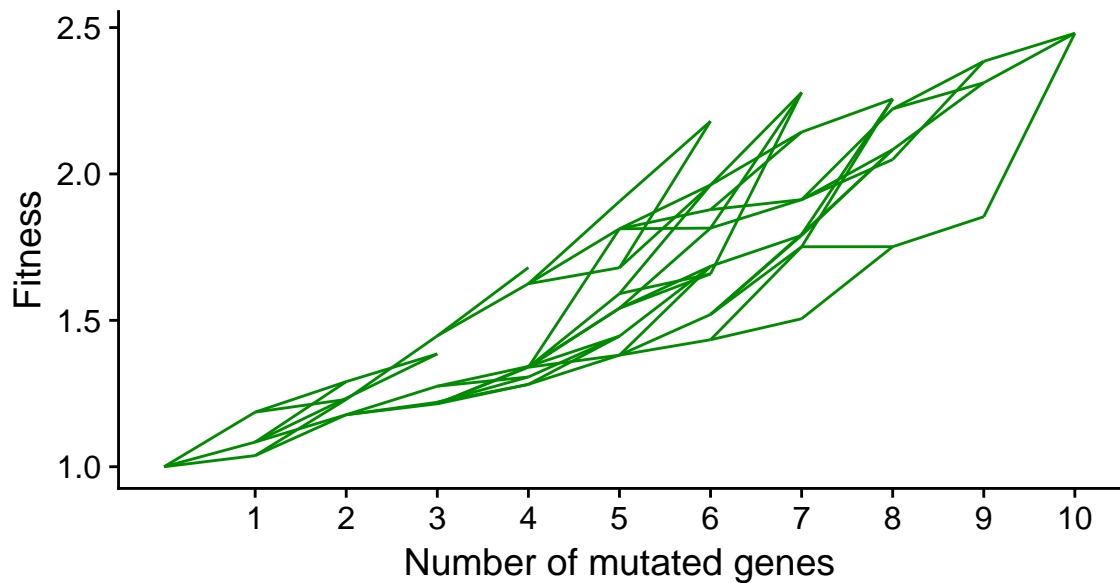



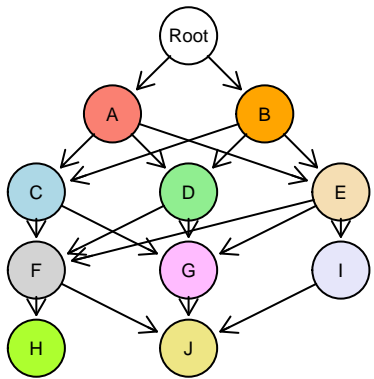

ID utFV4f4ZwaTtF6F7  
 acc genotypes 27  
 peaks no back 5  
 removed edges 7  
 prop rem edges 0.152

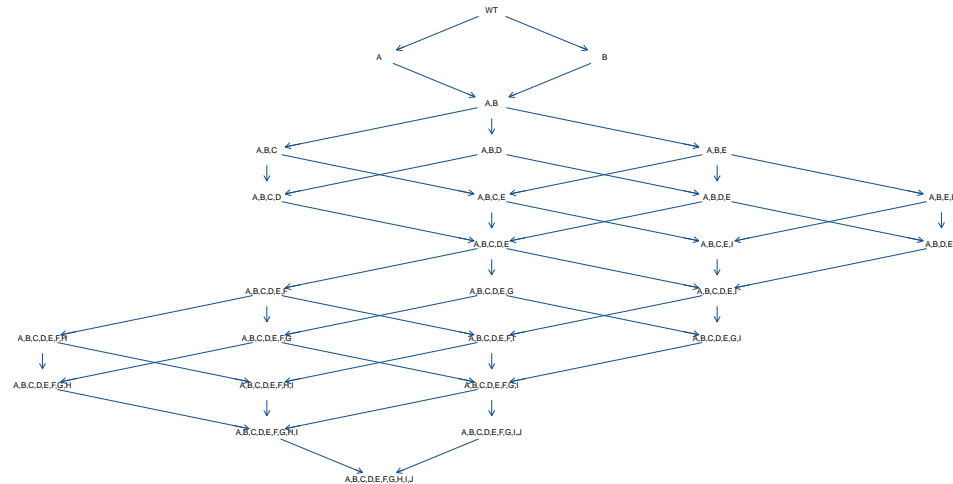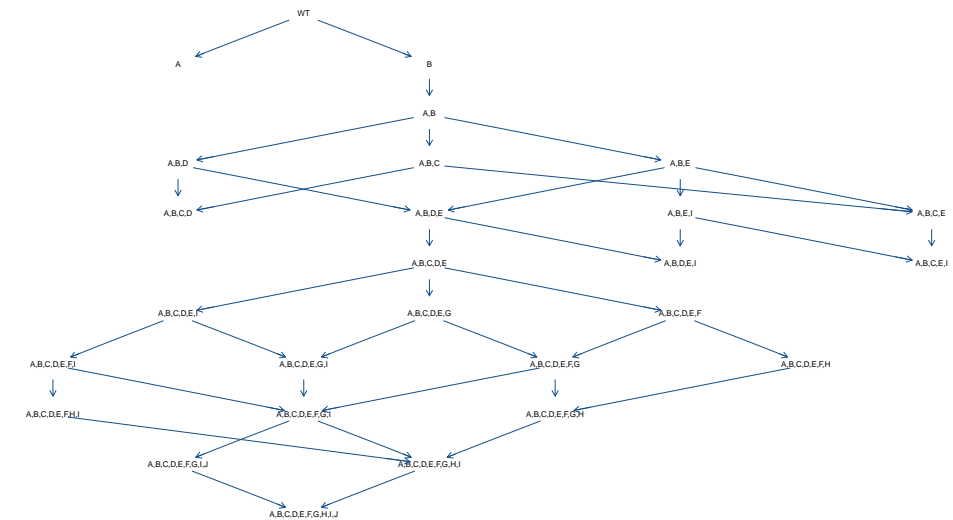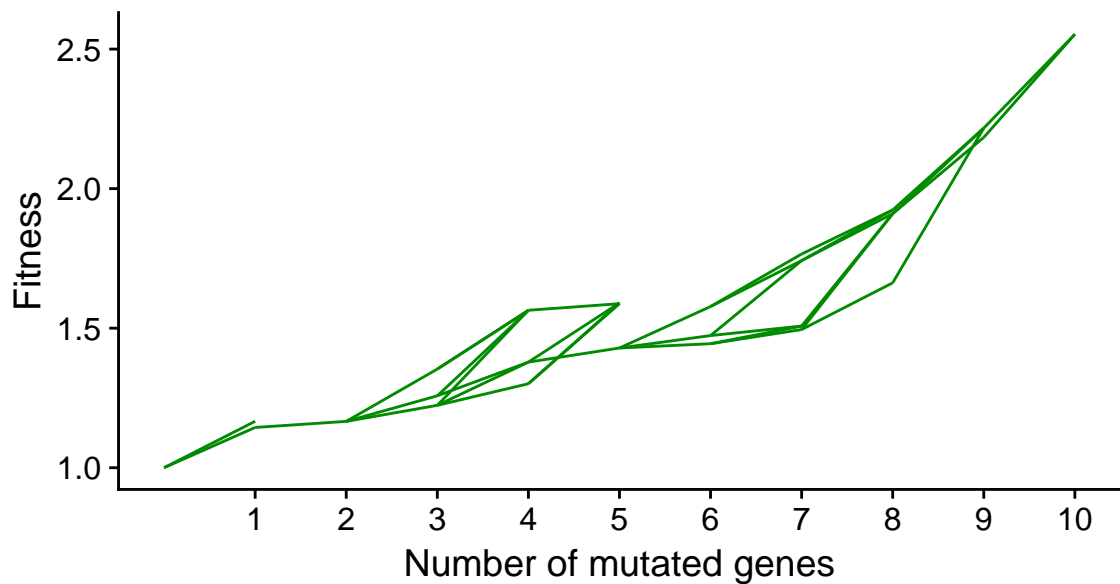

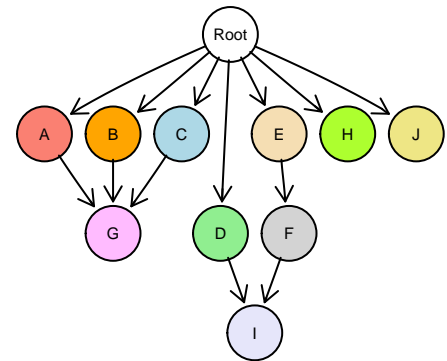

*ID* uzycnOVVW3JNvHXq  
*acc genotypes* 252  
*peaks no back* 17  
*removed edges* 162  
*prop rem edges* 0.179

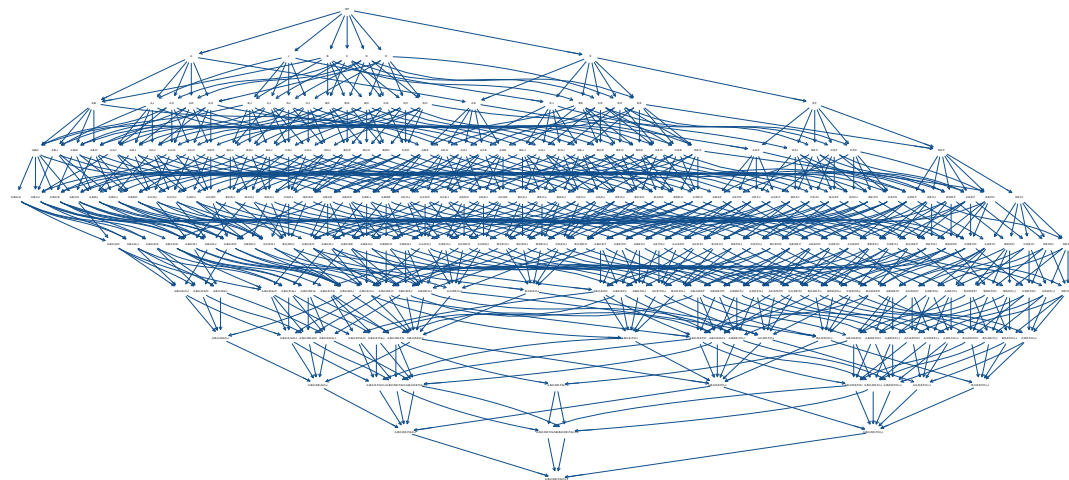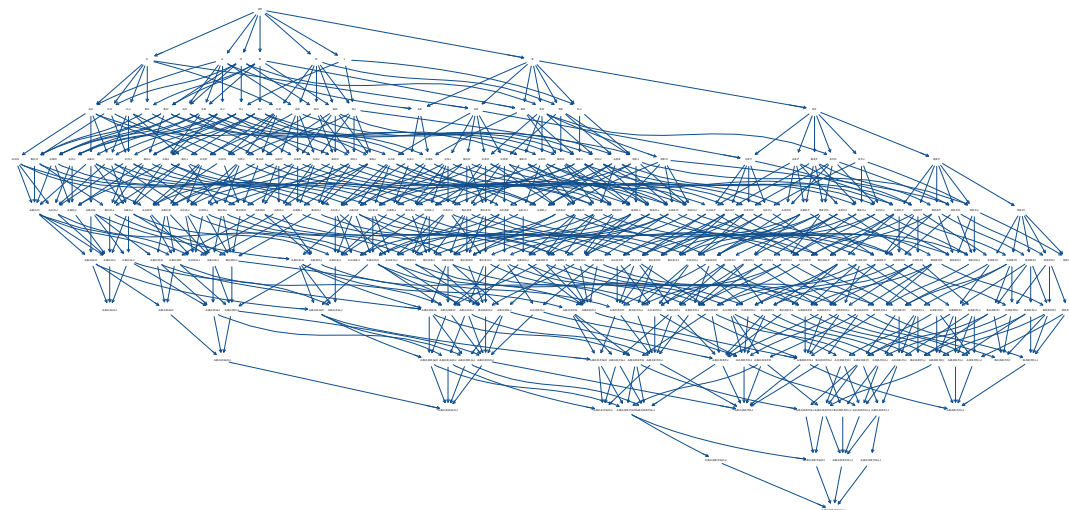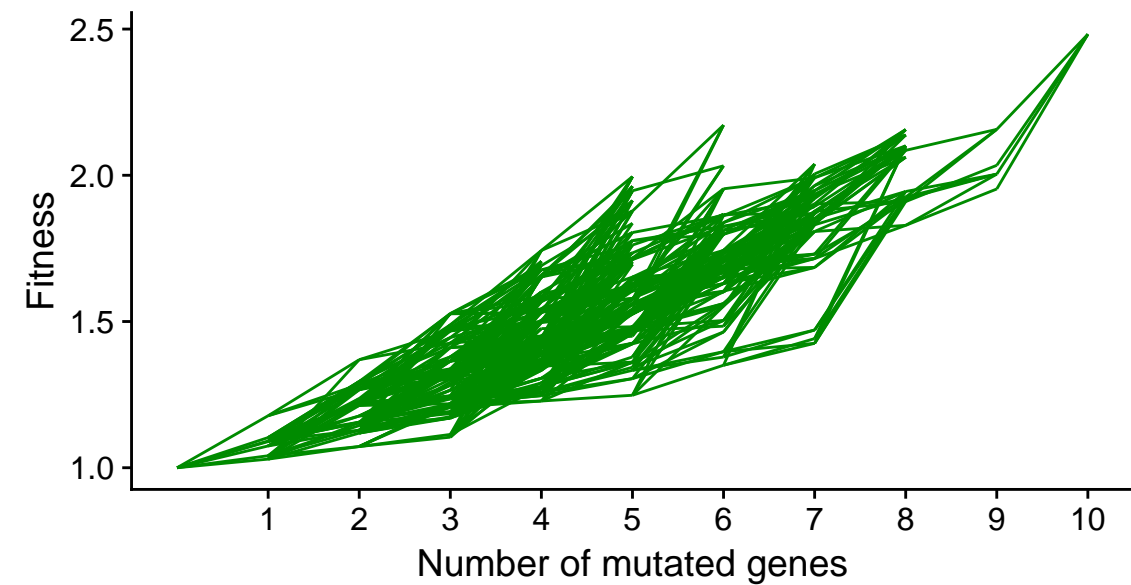

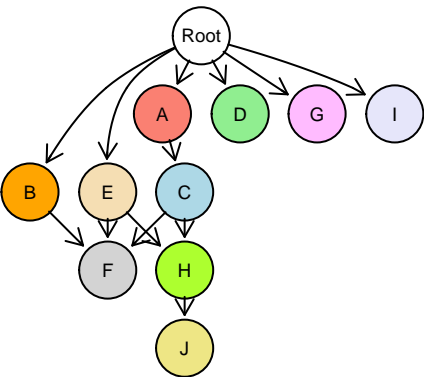

ID V3Myq6Ap7yTWkyC1  
 acc genotypes 152  
 peaks no back 19  
 removed edges 116  
 prop rem edges 0.244

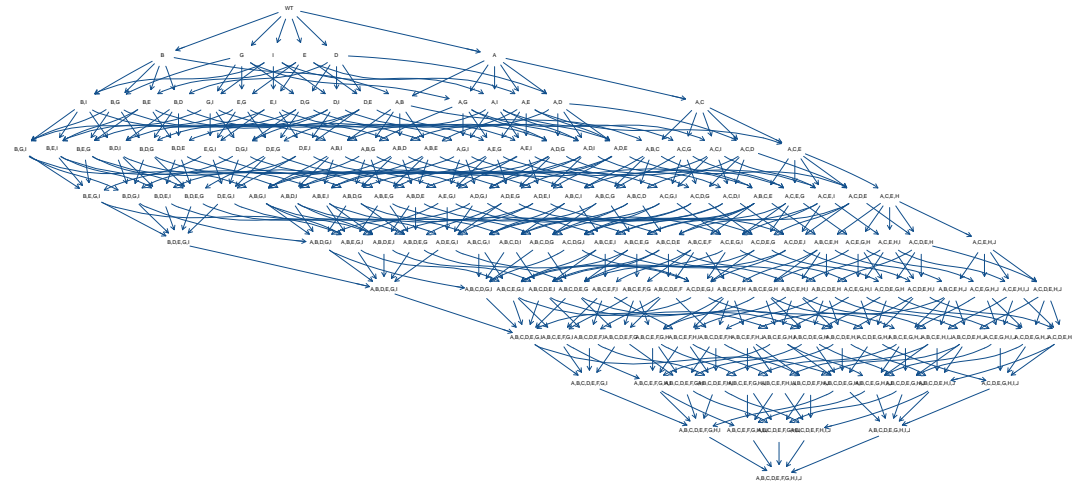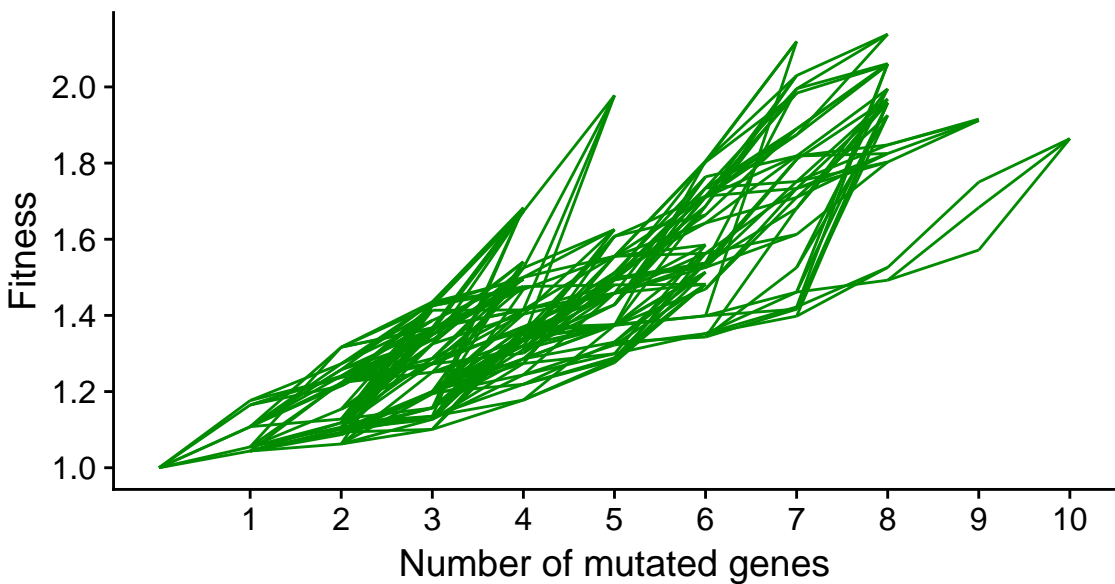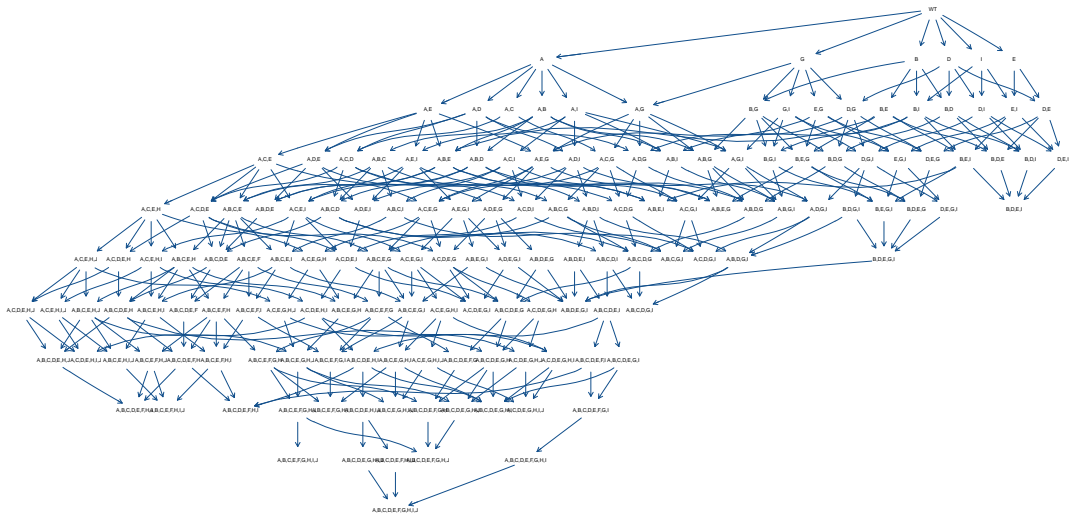

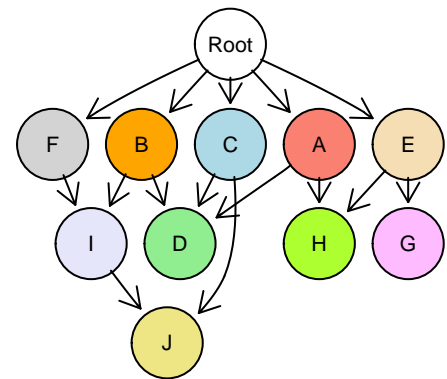

ID **v3T1IG10jXOD5TPVs**  
 acc genotypes **108**  
 peaks no back **11**  
 removed edges **62**  
 prop rem edges **0.212**

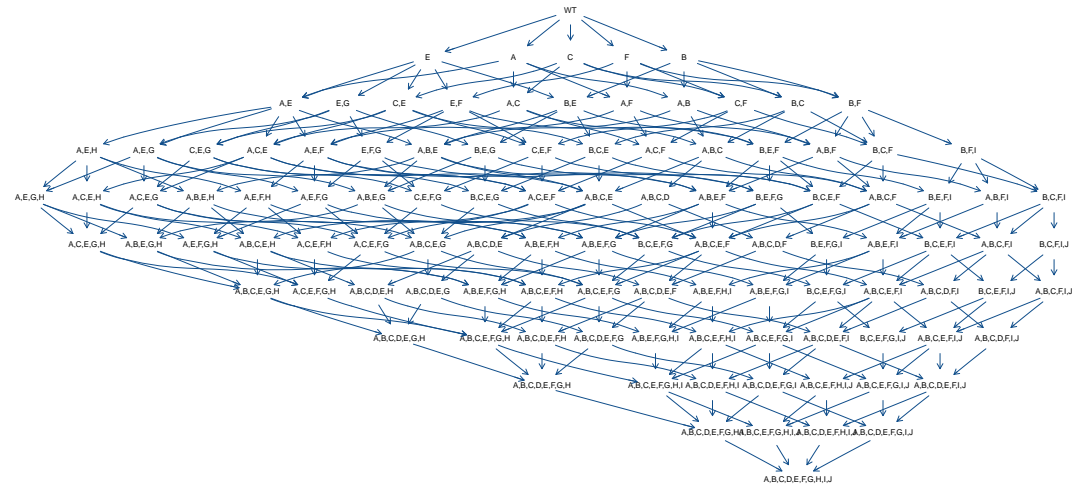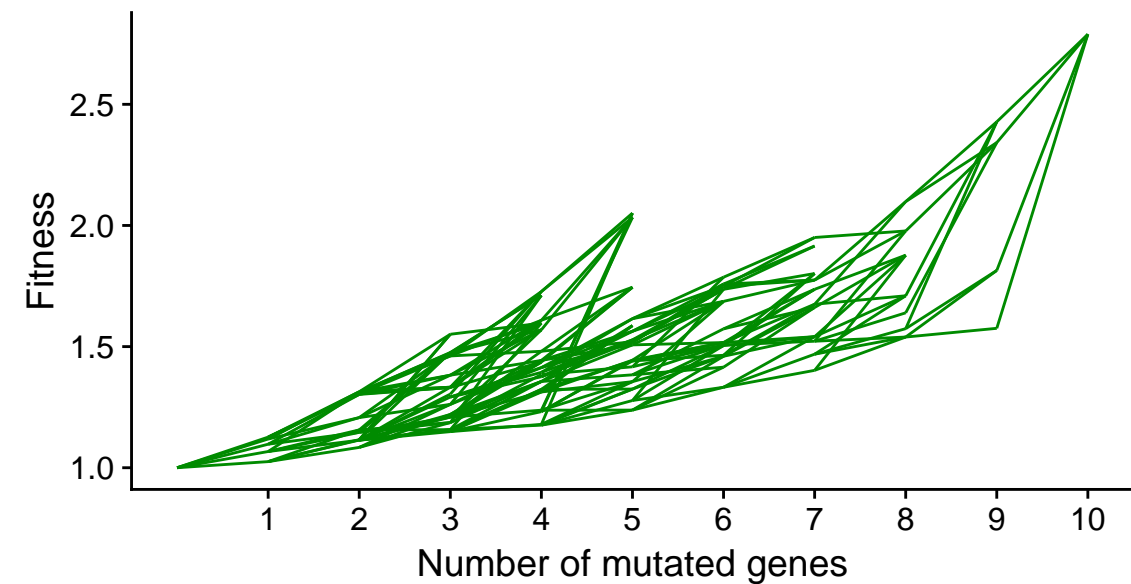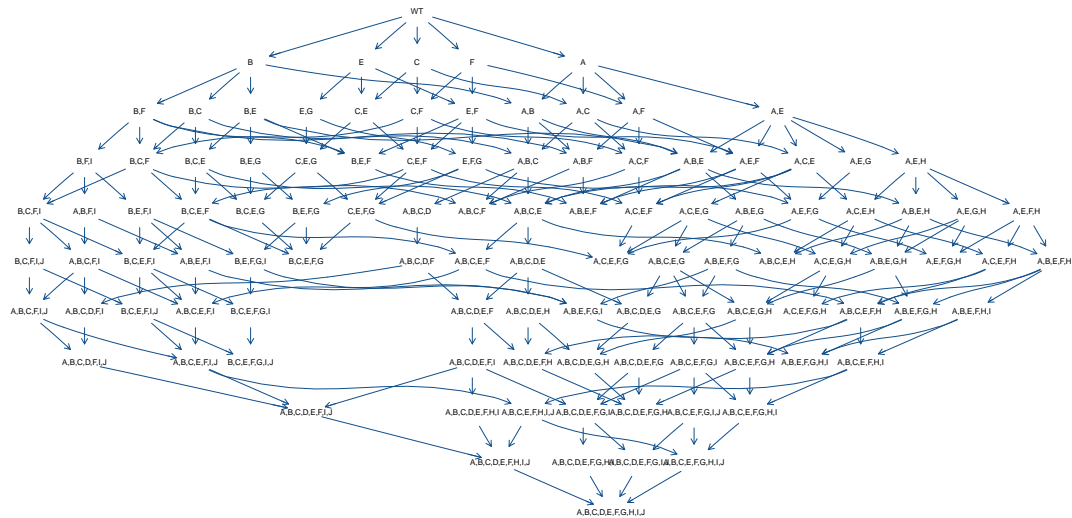

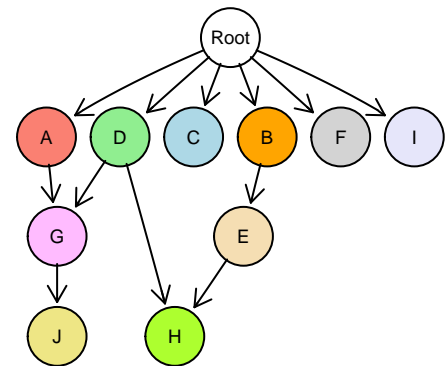

*ID* vDscwX1MSzAXnUjn  
*acc genotypes* 176  
*peaks no back* 14  
*removed edges* 95  
*prop rem edges* 0.17

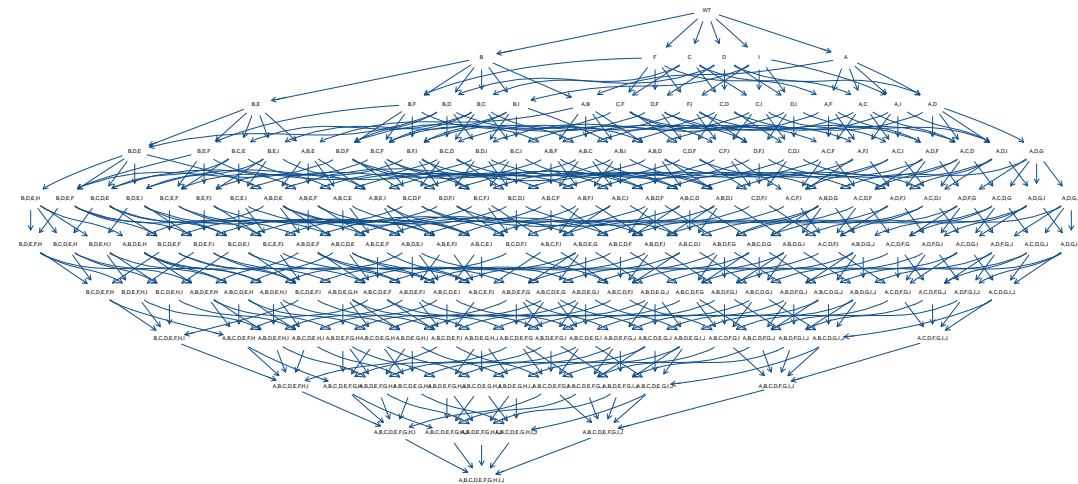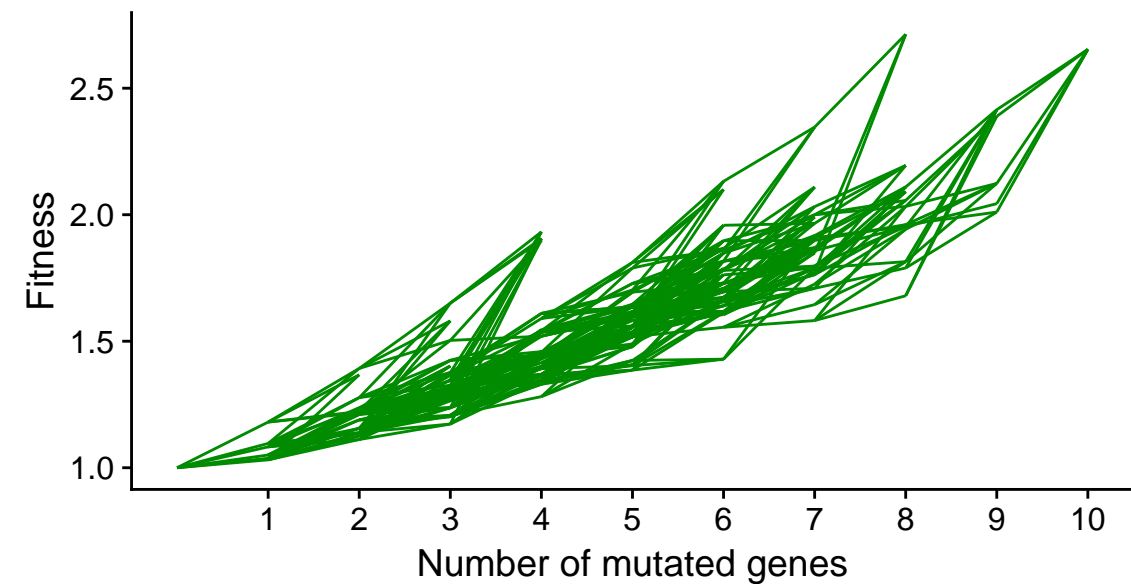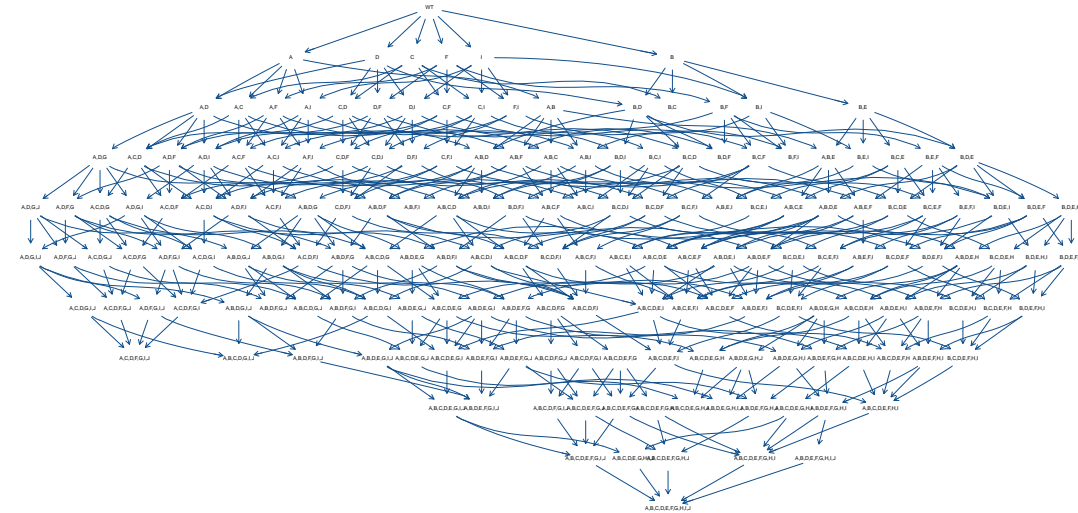

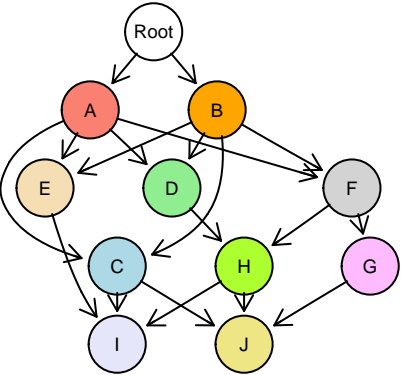

ID **veSOPRnIsirW3tXS**  
 acc genotypes **40**  
 peaks no back **7**  
 removed edges **18**  
 prop rem edges **0.214**

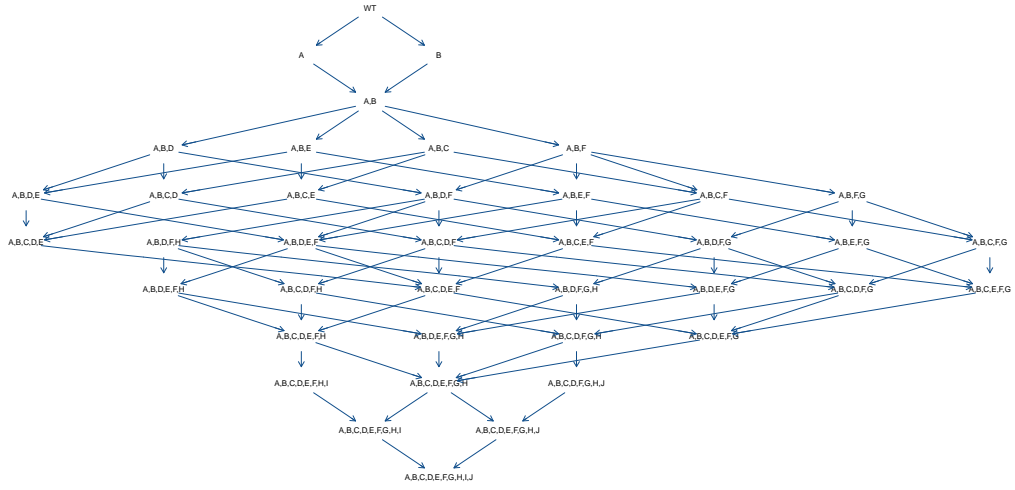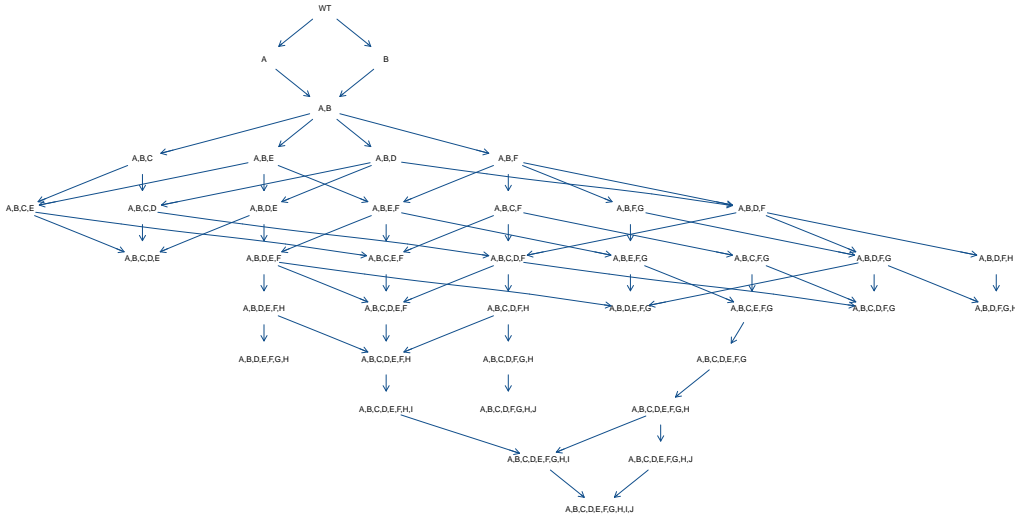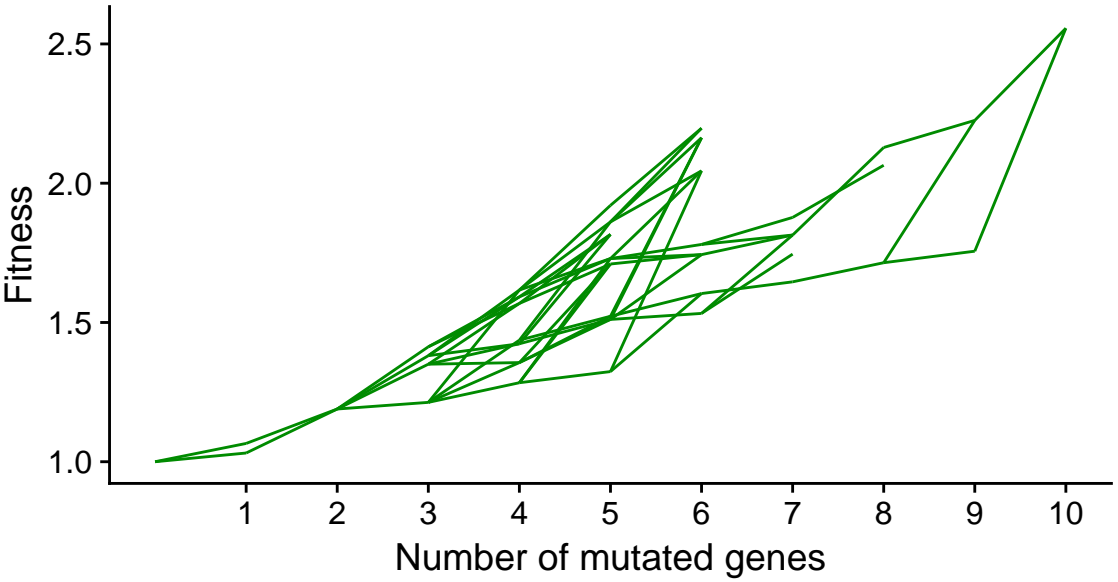

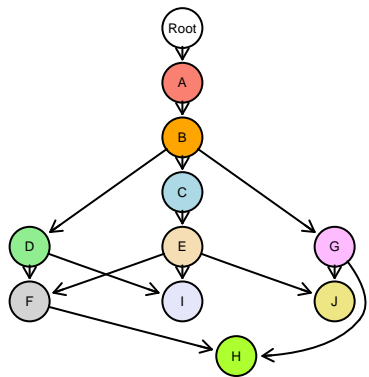

*ID* **vm585SzZroFfErOI**  
*acc genotypes* **29**  
*peaks no back* **2**  
*removed edges* **3**  
*prop rem edges* **0.059**

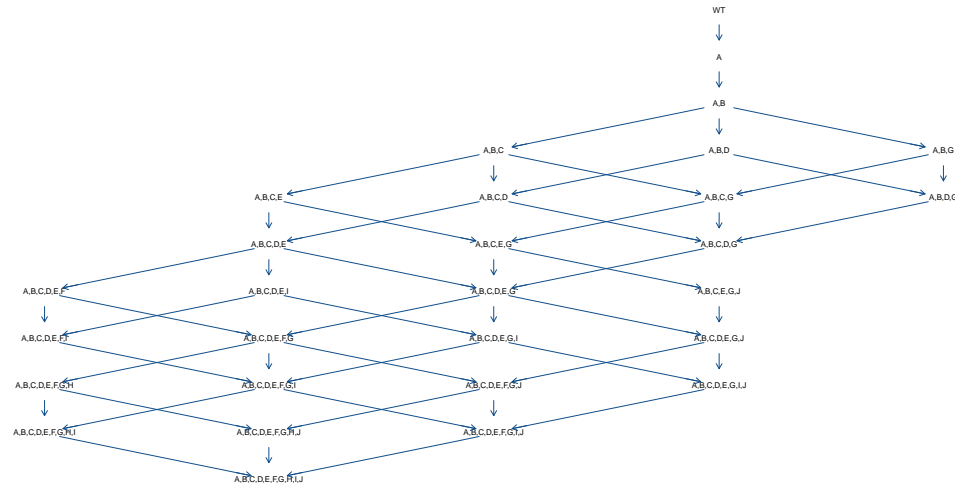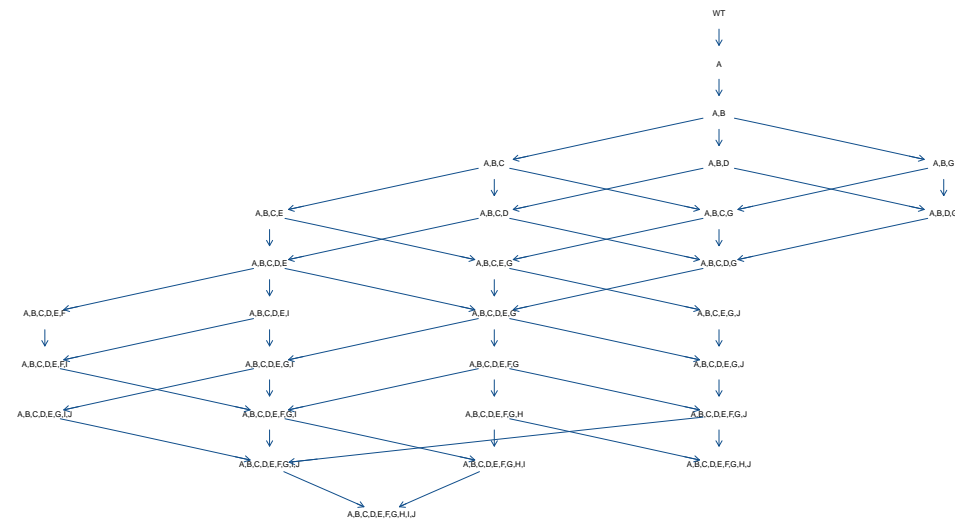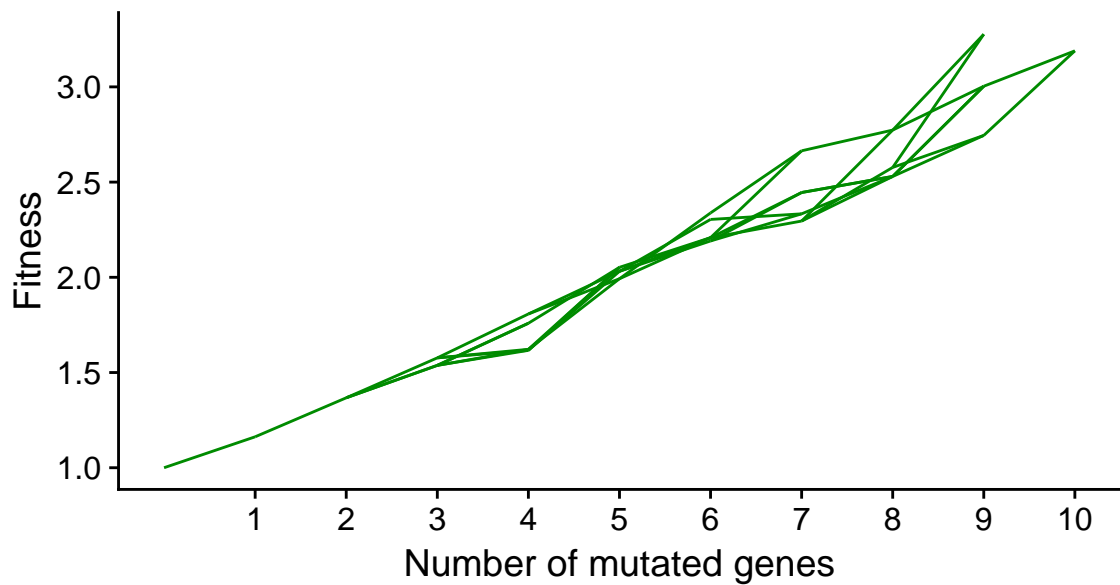

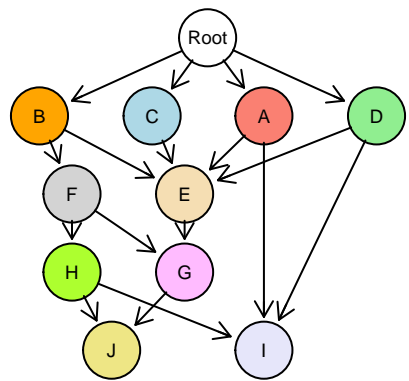

ID VNq9x3A103vjj6H6C  
 acc genotypes 43  
 peaks no back 6  
 removed edges 18  
 prop rem edges 0.2

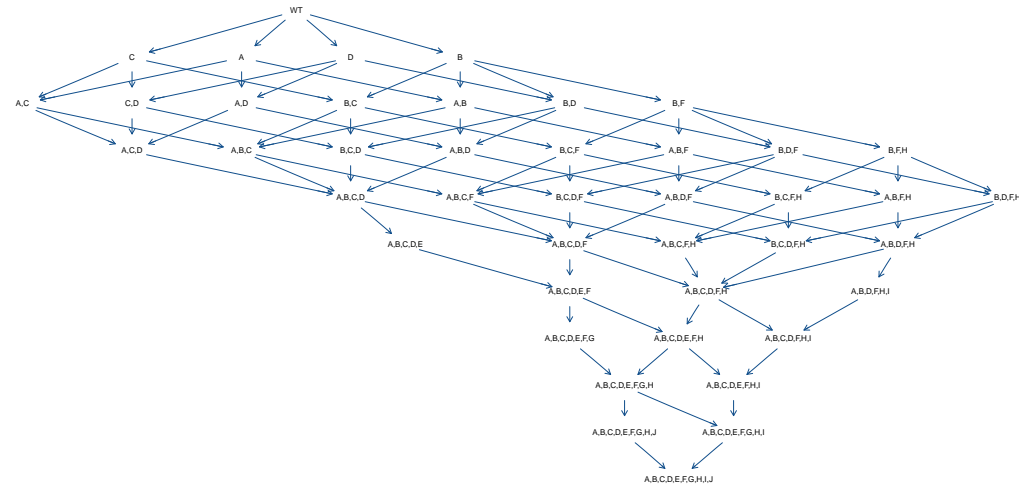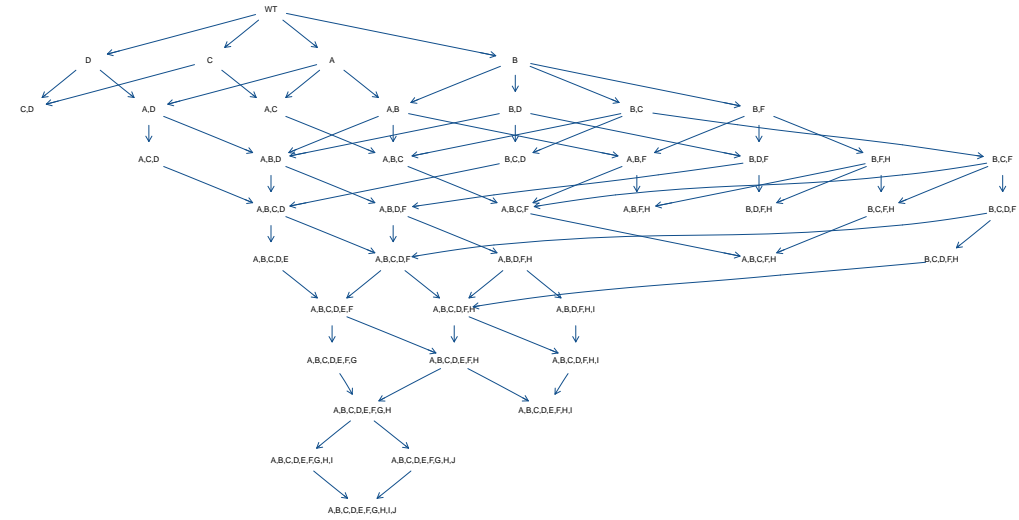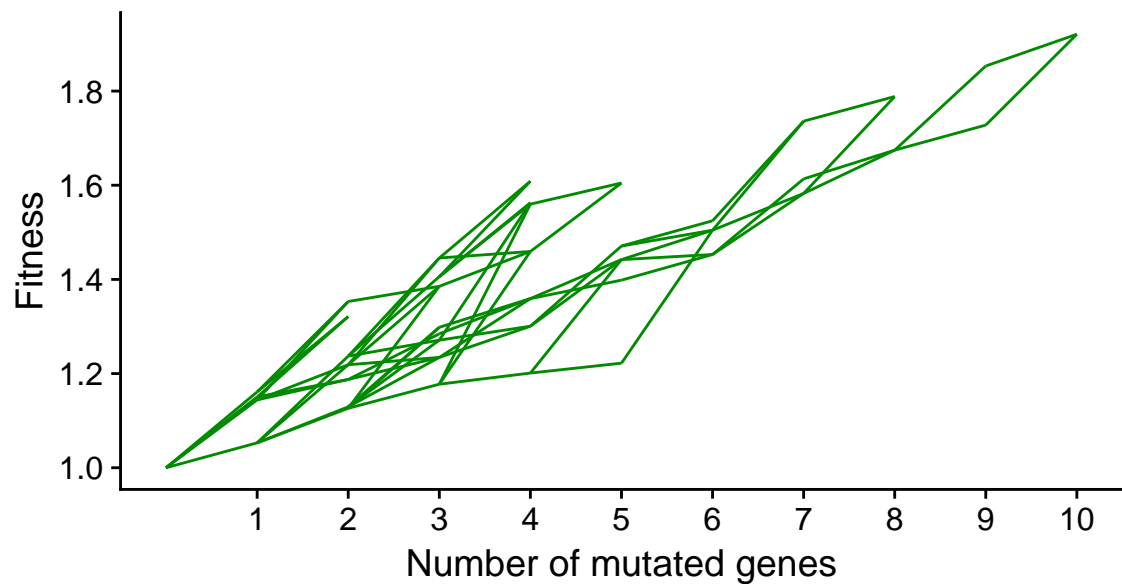



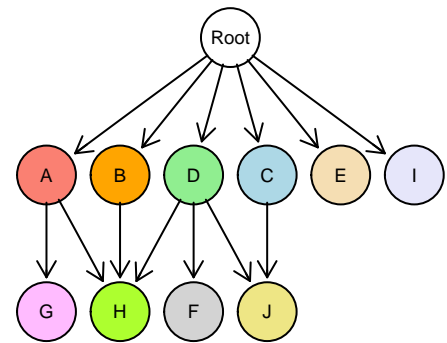

*ID* w2gKASMJutkLe4I3  
*acc genotypes* 240  
*peaks no back* 20  
*removed edges* 158  
*prop rem edges* 0.19

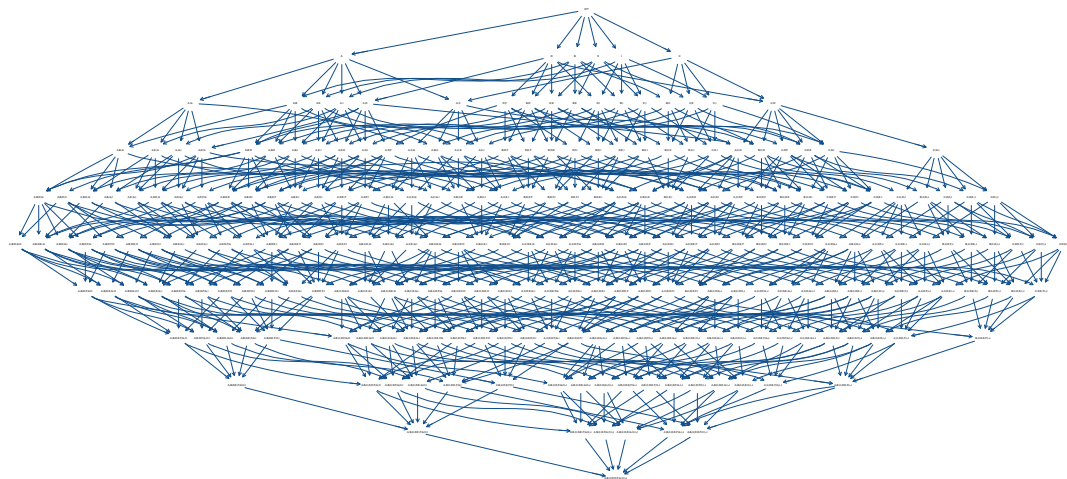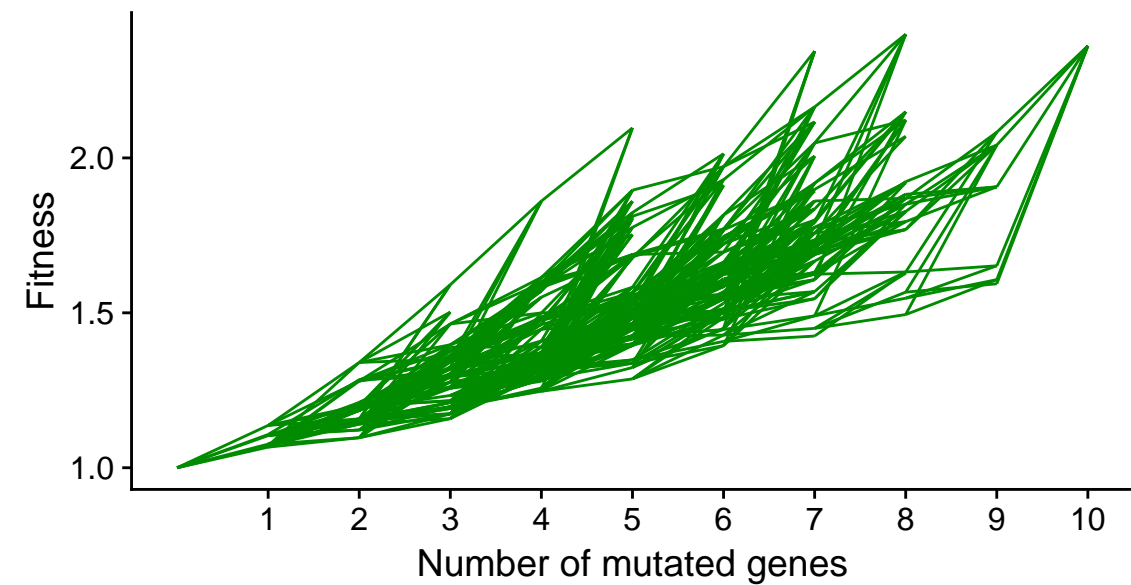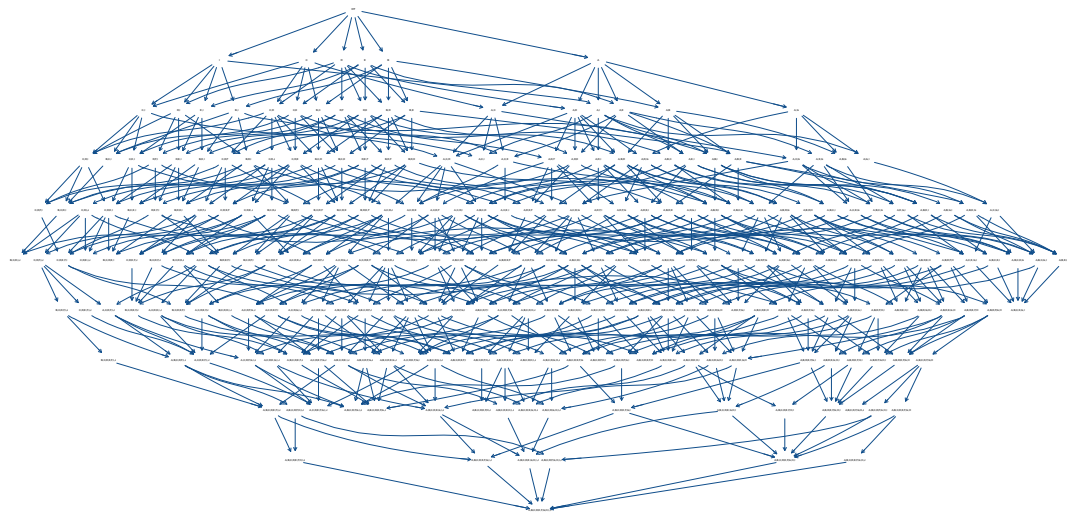

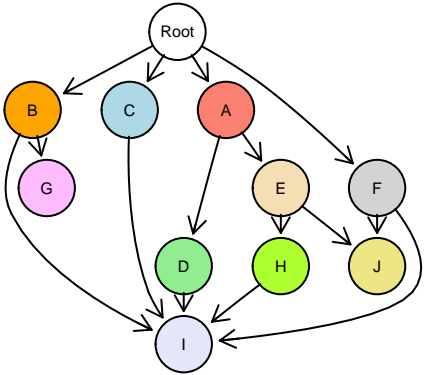

*ID* wavyEmnct10zXrBsJ  
*acc genotypes* 112  
*peaks no back* 11  
*removed edges* 68  
*prop rem edges* 0.212

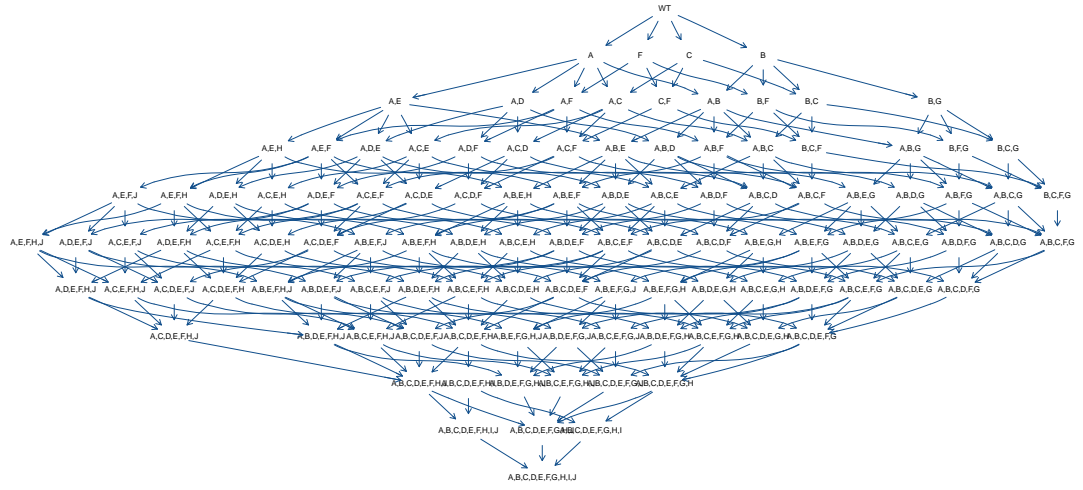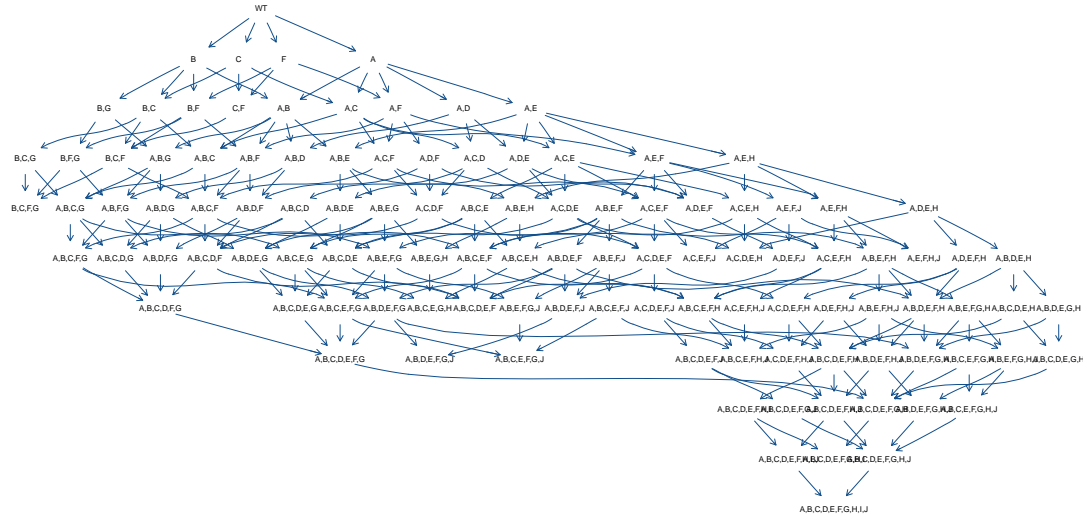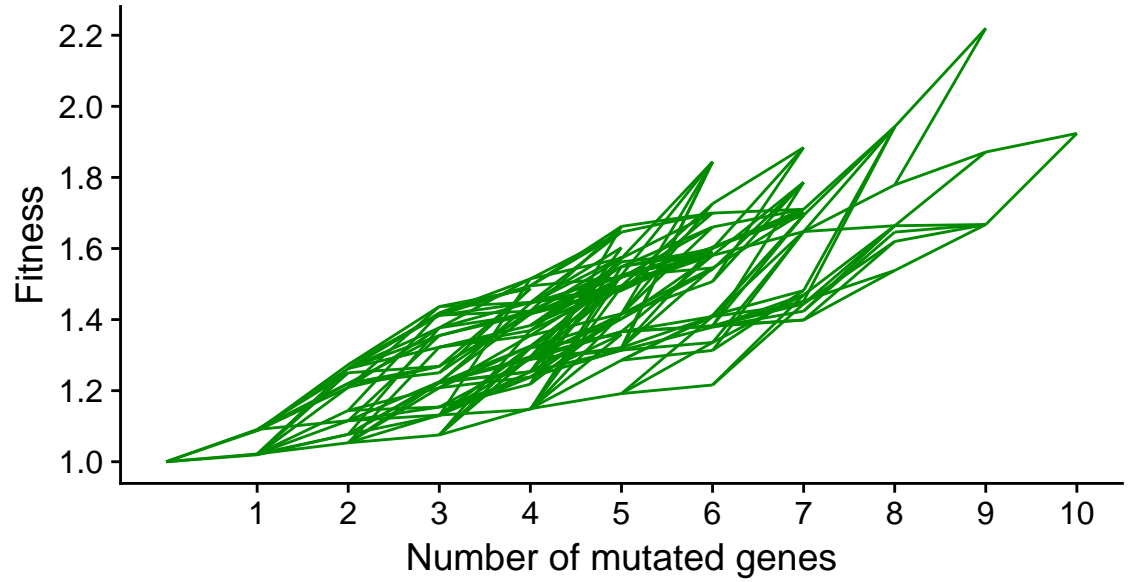

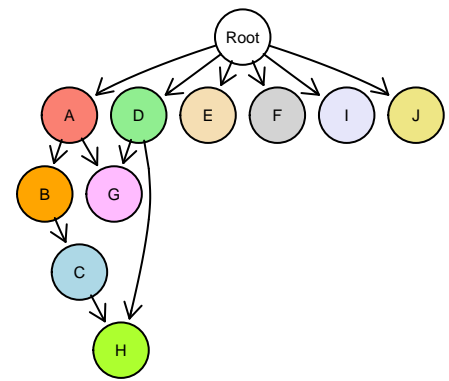

ID **wcH6gWqLOjM6KUvj**  
 acc genotypes **208**  
 peaks no back **21**  
 removed edges **145**  
 prop rem edges **0.206**

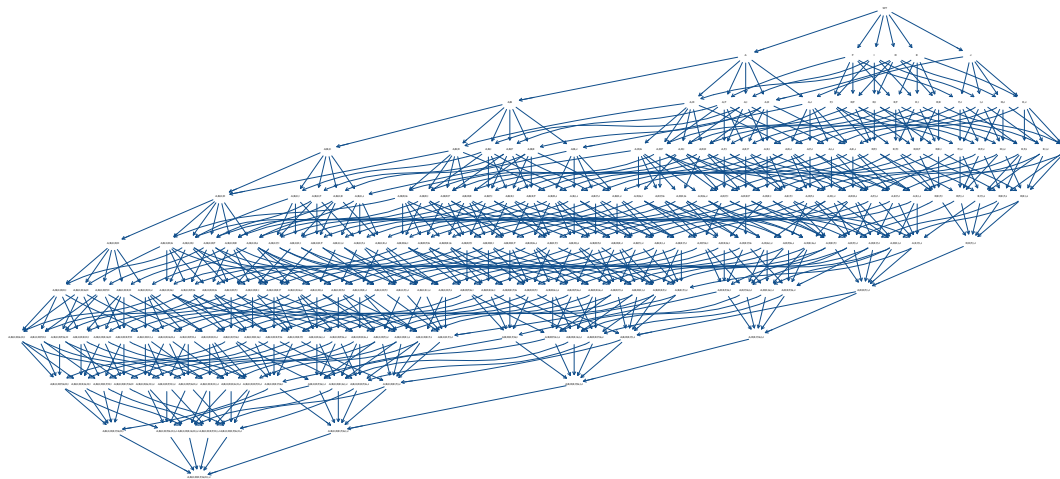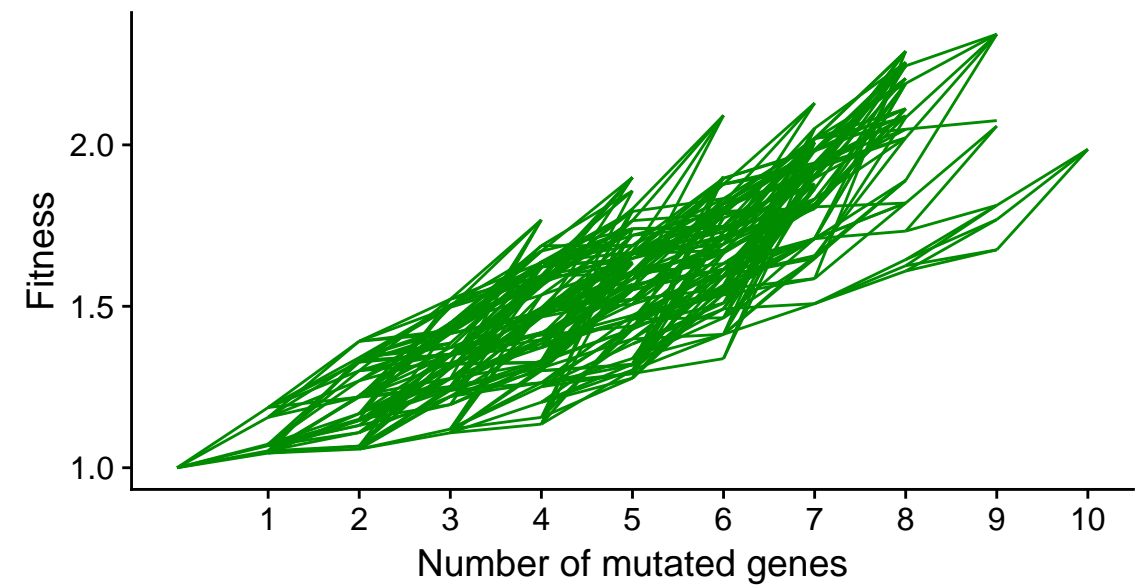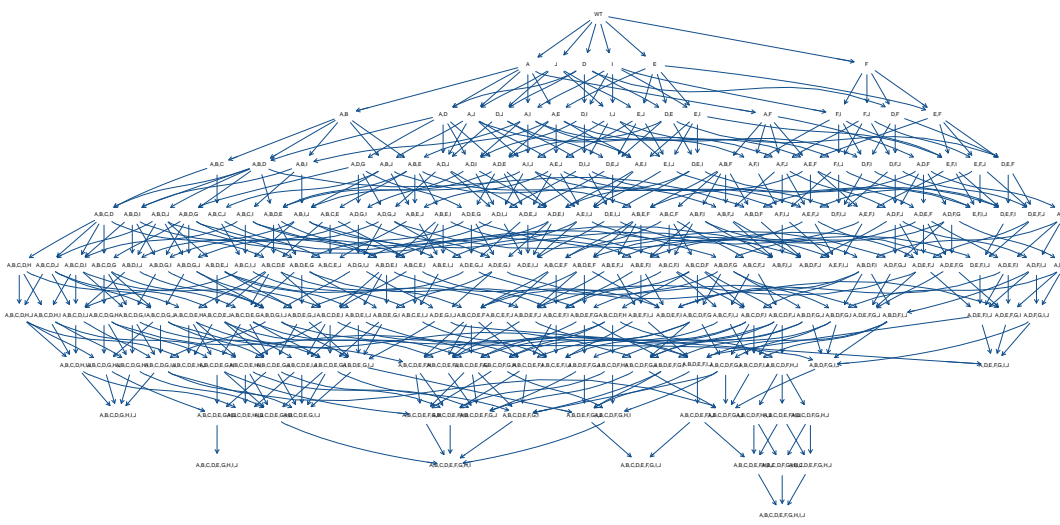

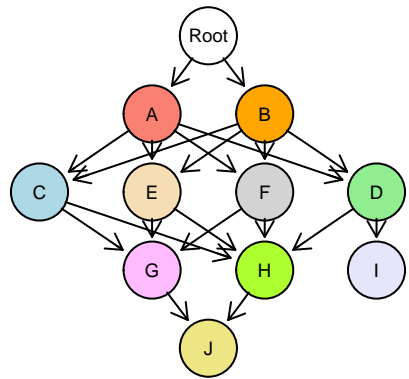

ID [wCi29Nr110GfPJ9ih](#)  
 acc genotypes 36  
 peaks no back 6  
 removed edges 10  
 prop rem edges 0.139

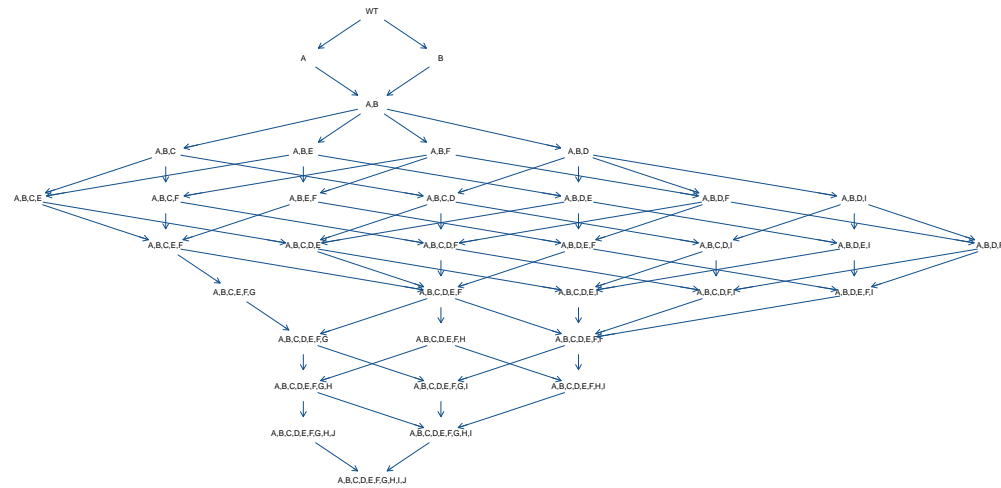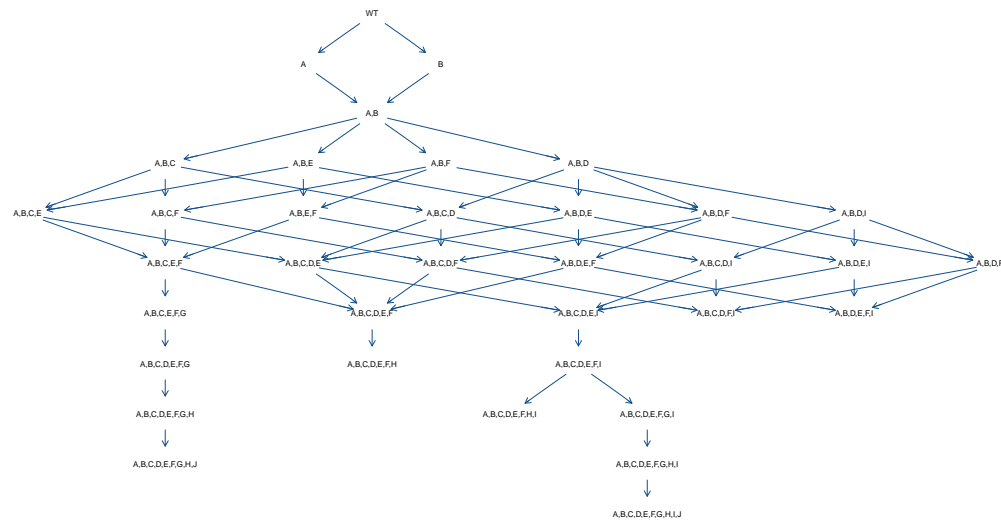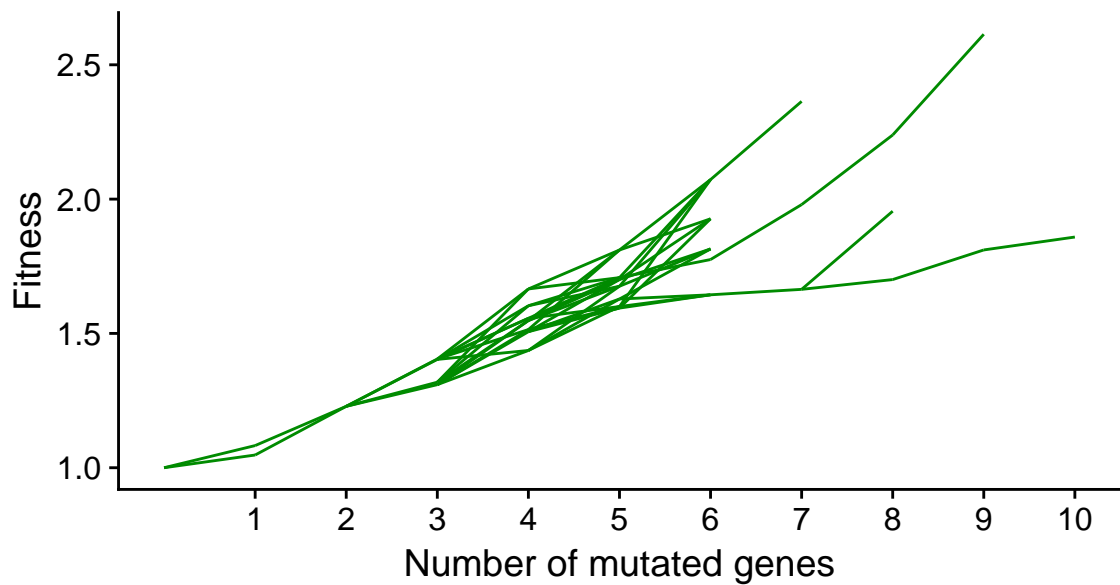

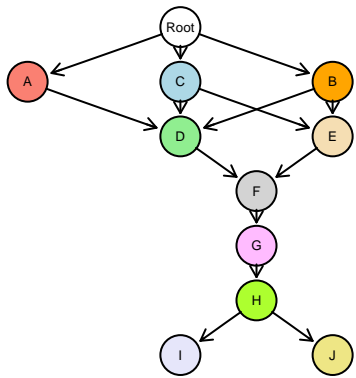

ID **WMUVgmnyi qxYFBg6**  
 acc genotypes **18**  
 peaks no back **2**  
 removed edges **2**  
 prop rem edges **0.08**

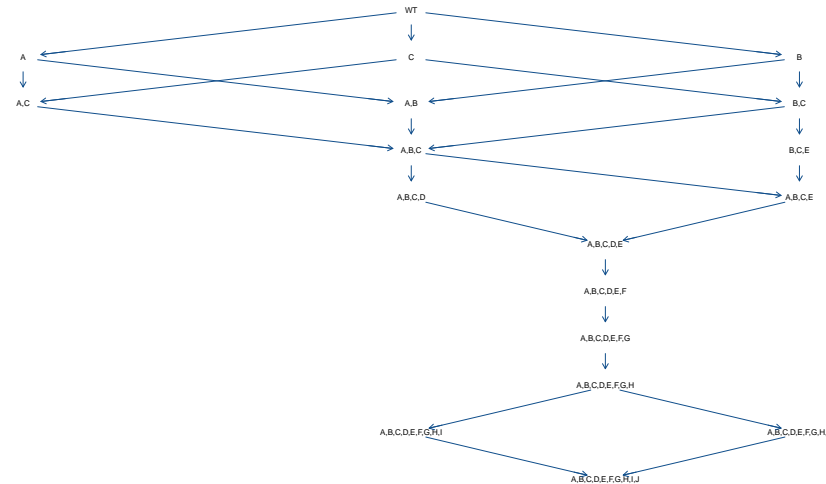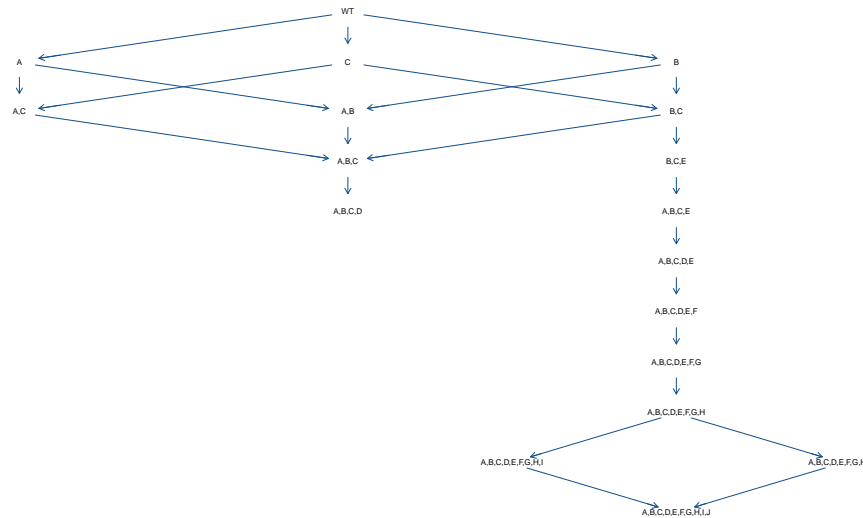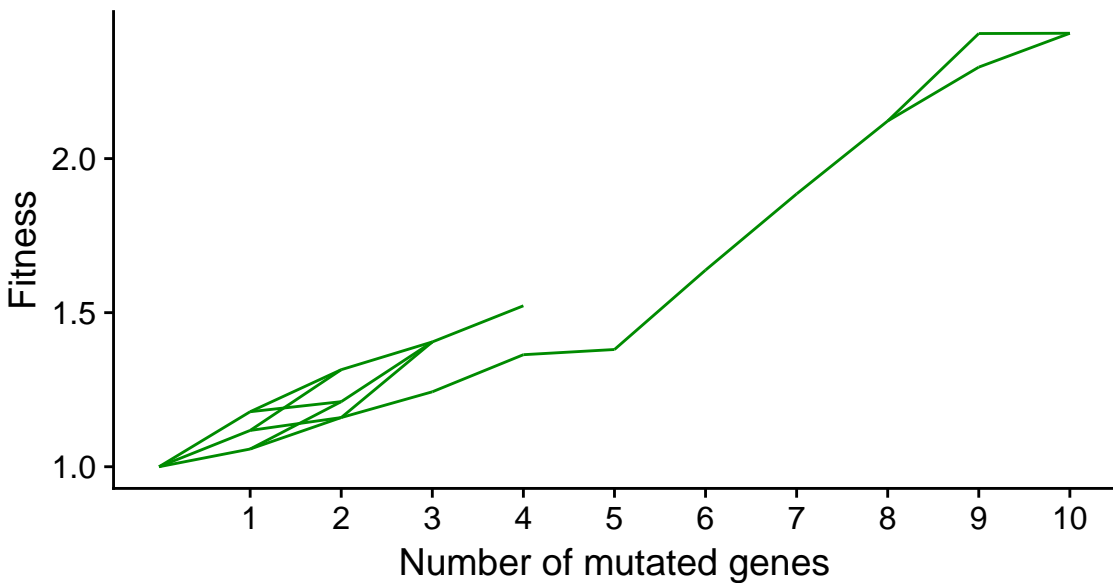

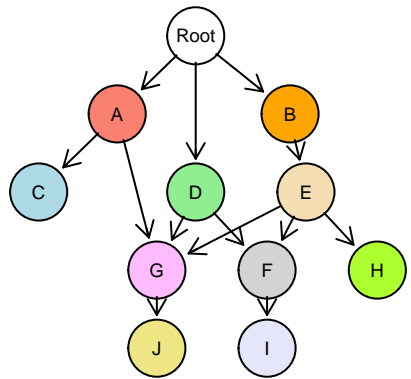

ID **WNDLFwNIHctCAAKK**  
 acc genotypes **60**  
 peaks no back **7**  
 removed edges **24**  
 prop rem edges **0.176**

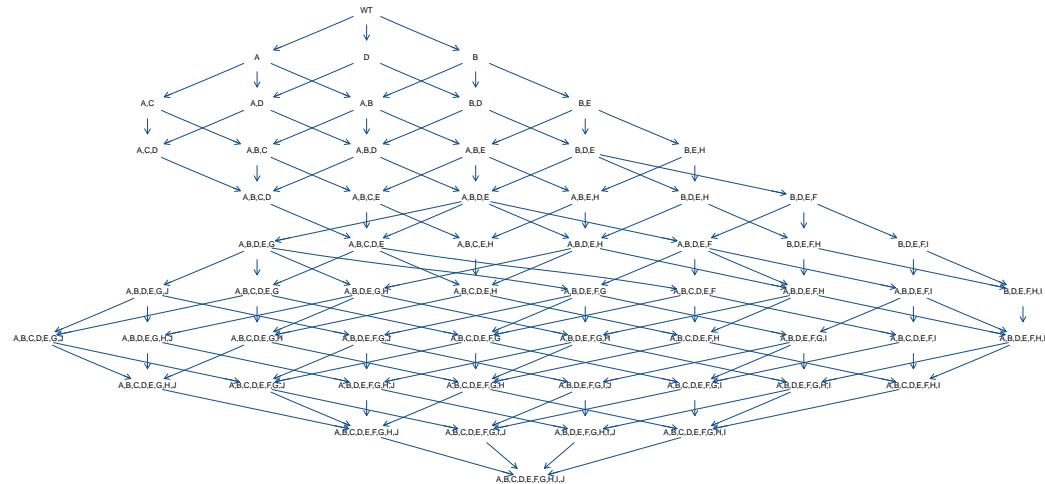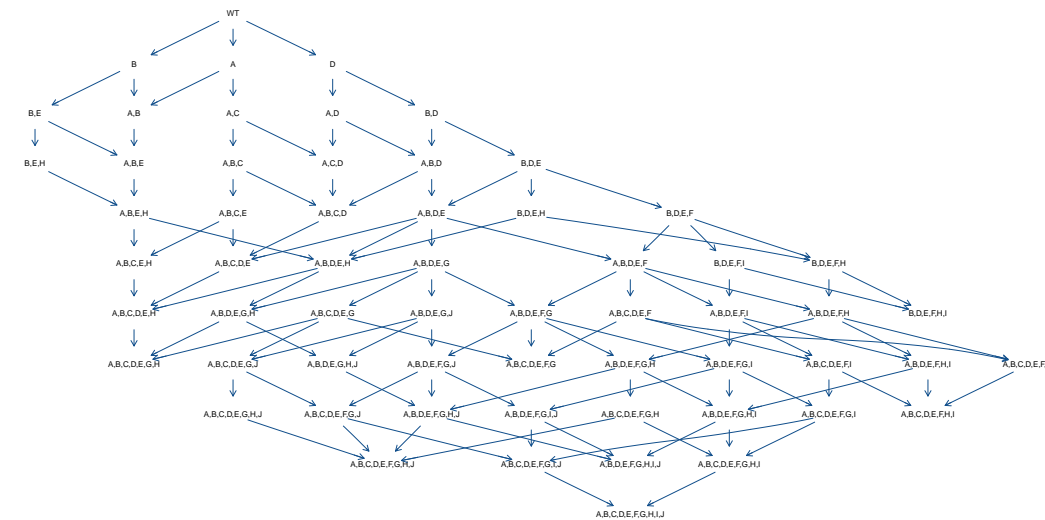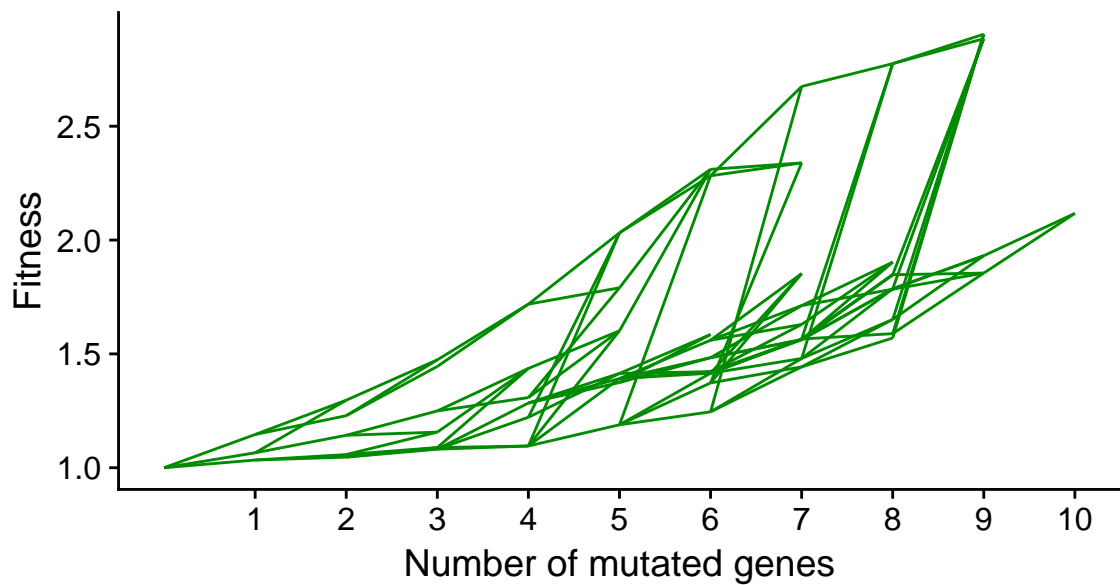

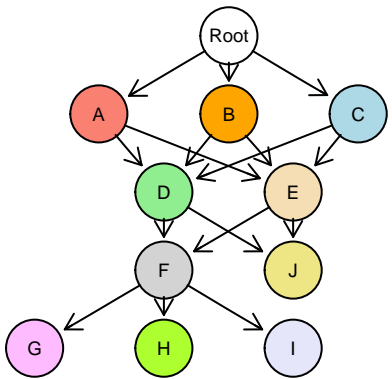

ID [wrYzolpOzxMG9bWu](#)  
 acc genotypes 28  
 peaks no back 4  
 removed edges 6  
 prop rem edges 0.118

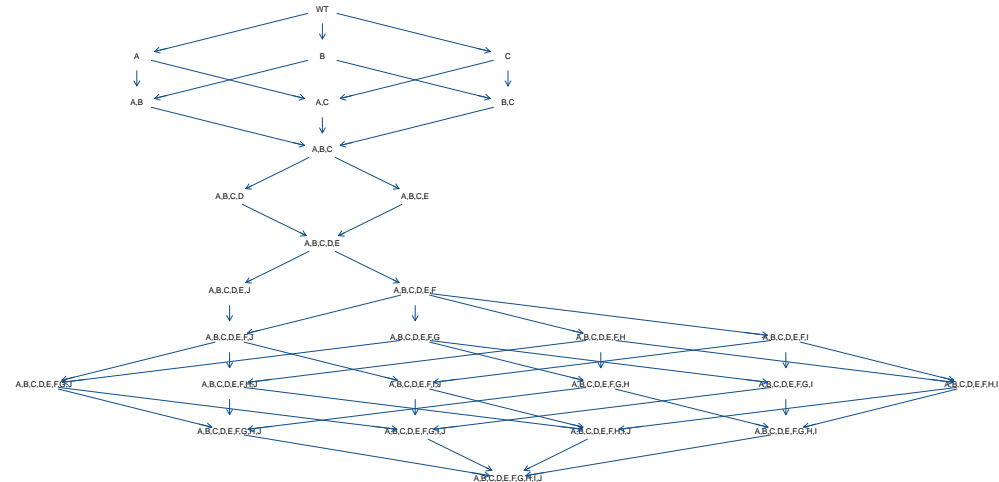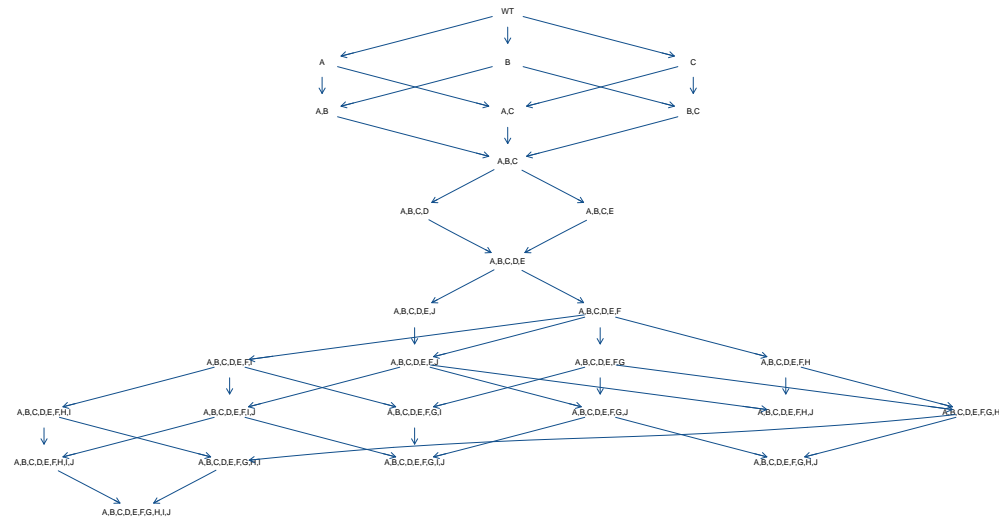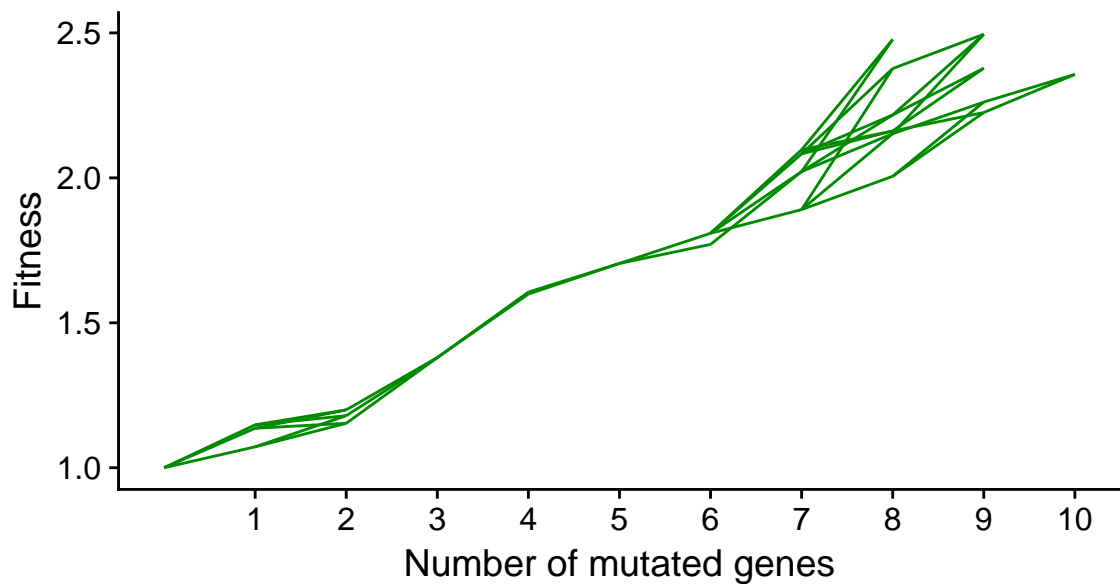

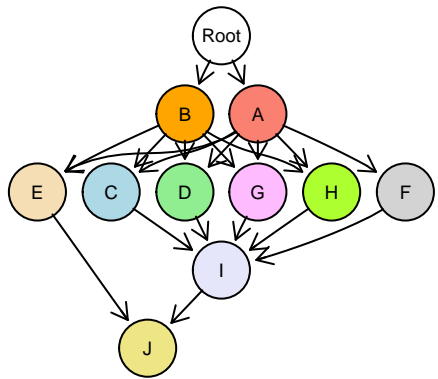

ID **ws10WbhFUWR9mXKoe**  
 acc genotypes **71**  
 peaks no back **8**  
 removed edges **29**  
 prop rem edges **0.144**

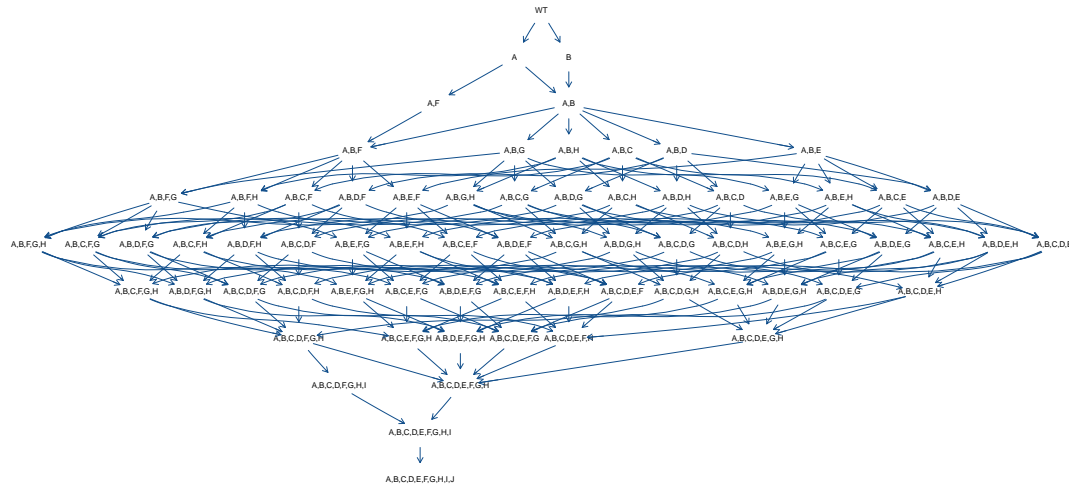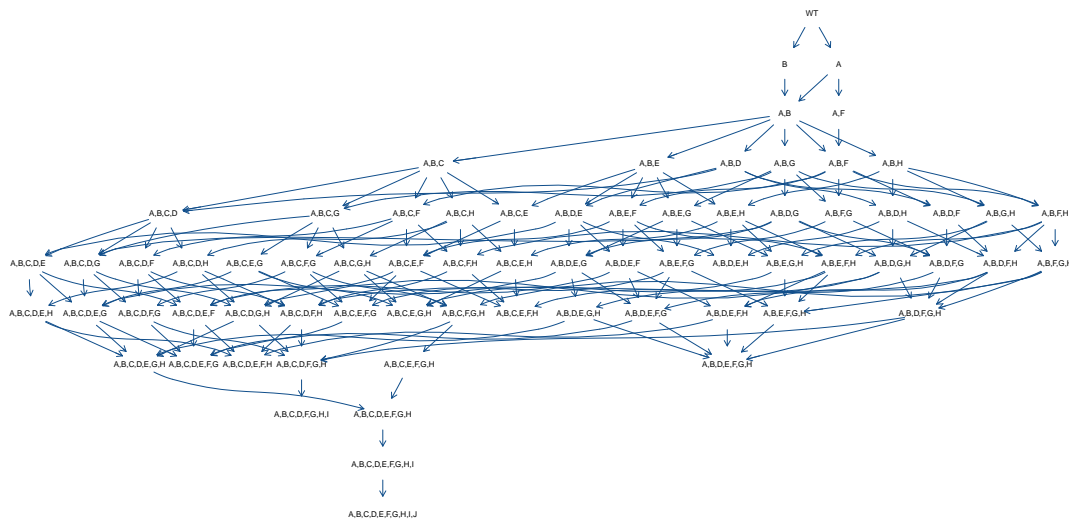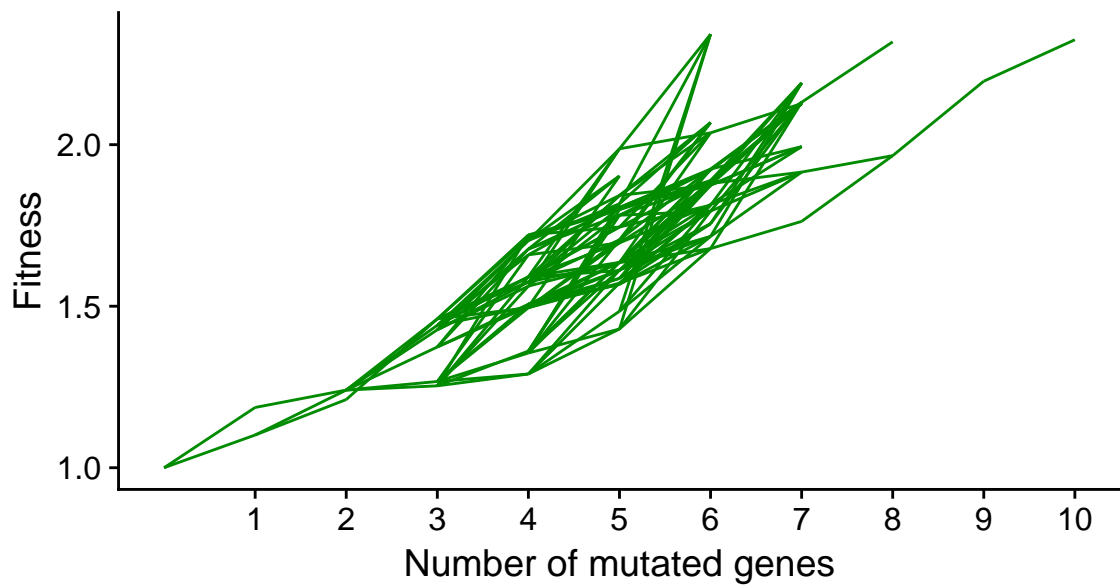



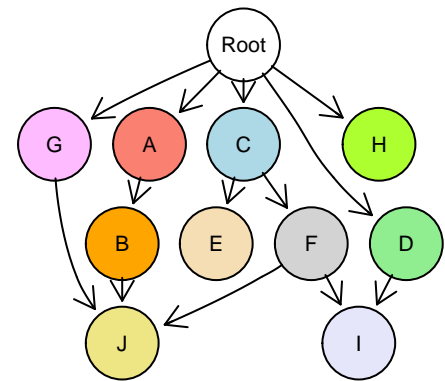

ID **wUaJscj5U6EXgDIC**  
 acc genotypes **156**  
 peaks no back **14**  
 removed edges **87**  
 prop rem edges **0.178**

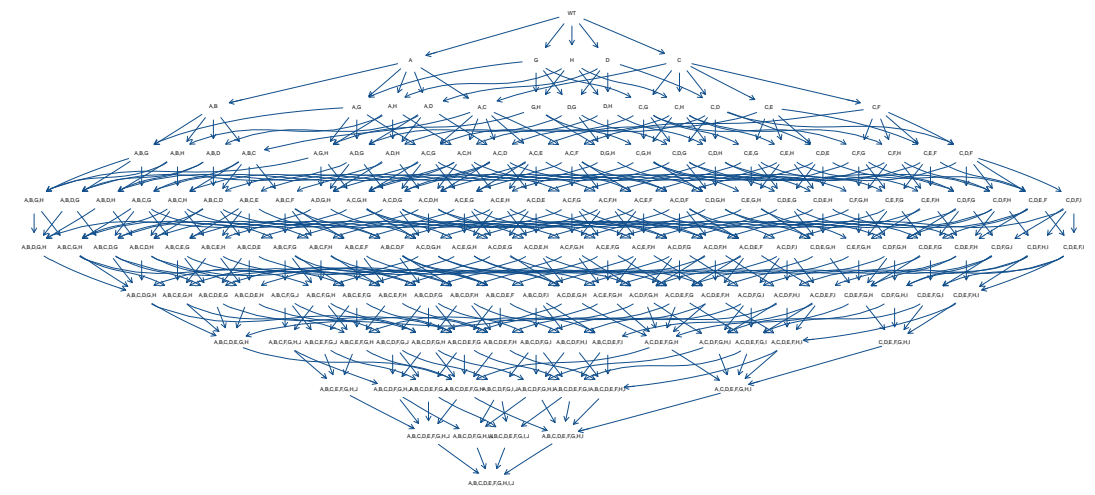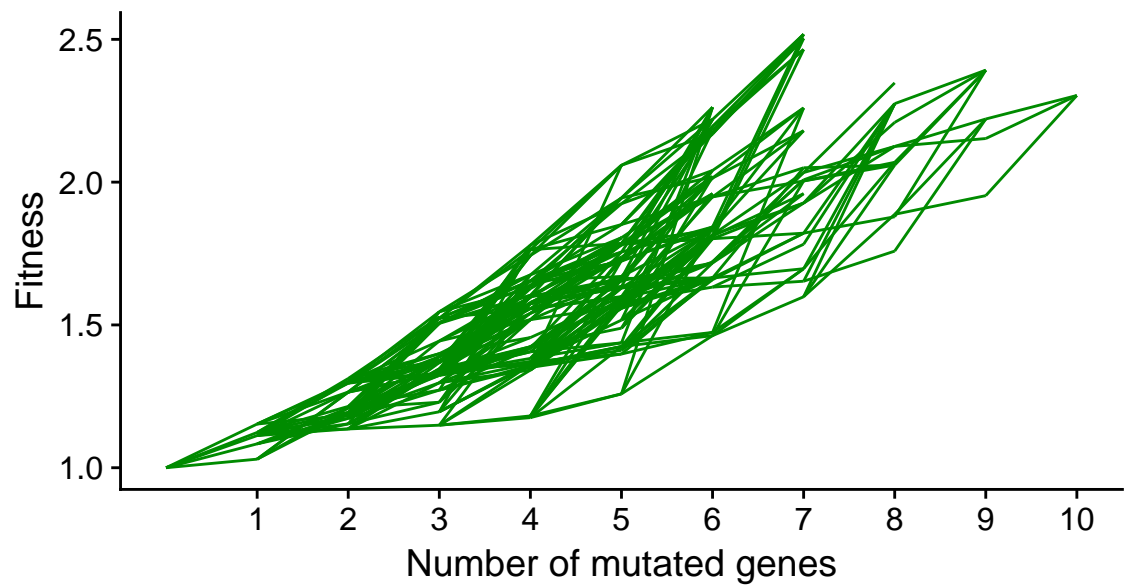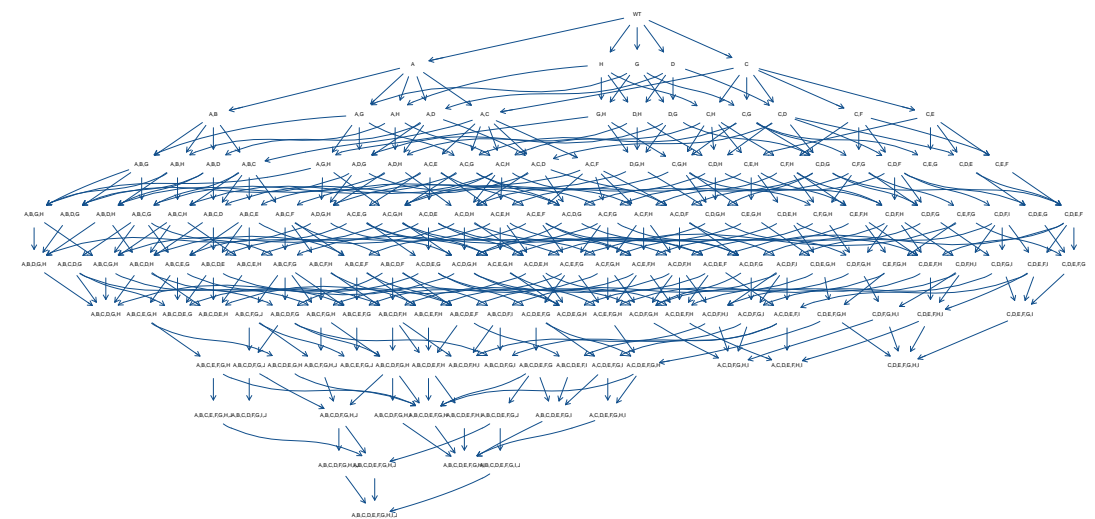

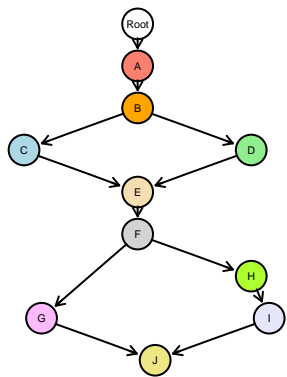

ID **Xajlk5zcAsLjK9cr**  
 acc genotypes **14**  
 peaks no back **3**  
 removed edges **2**  
 prop rem edges **0.125**

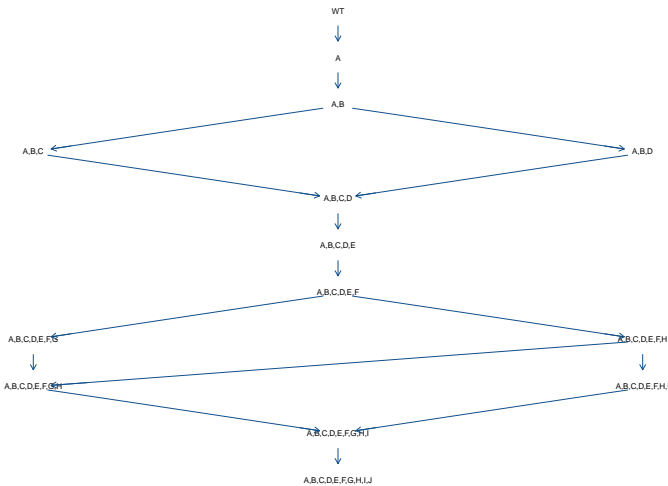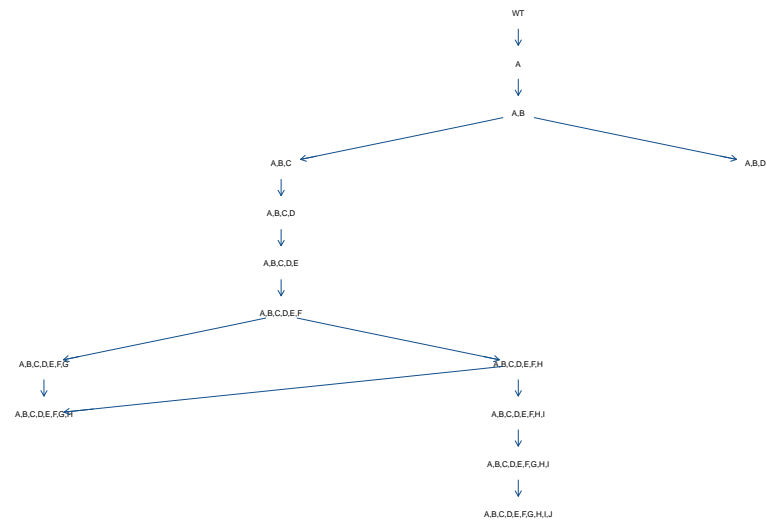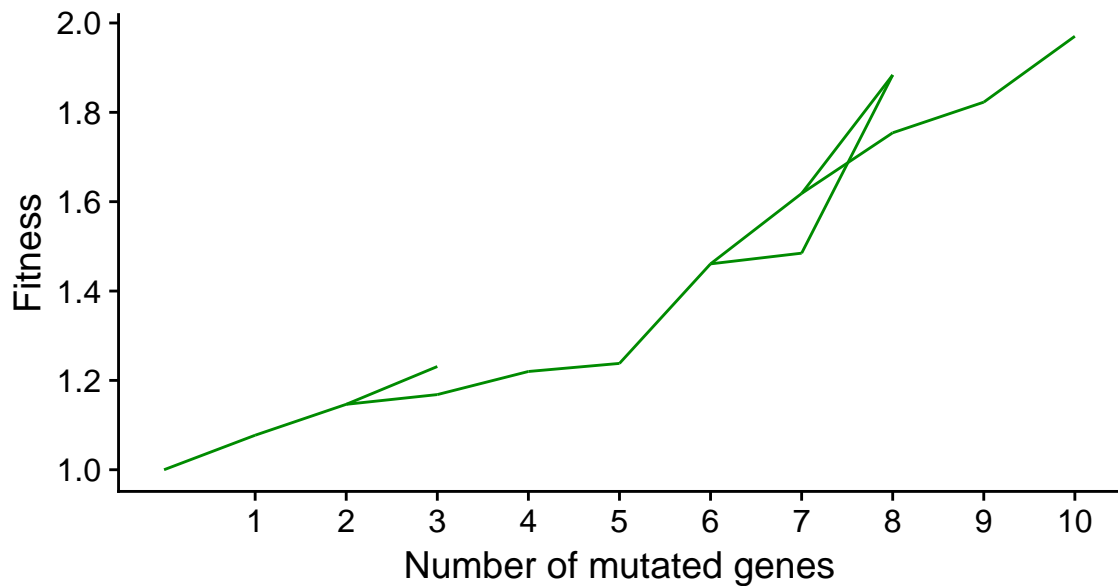

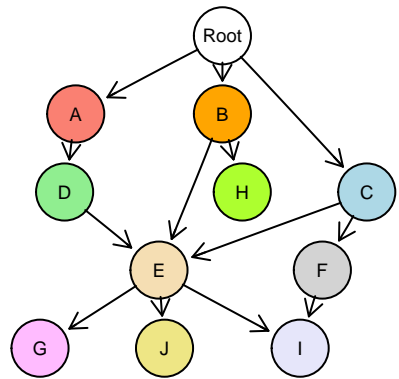

ID **xAYN10rolXAsrpbMd**  
 acc genotypes **51**  
 peaks no back **9**  
 removed edges **16**  
 prop rem edges **0.145**

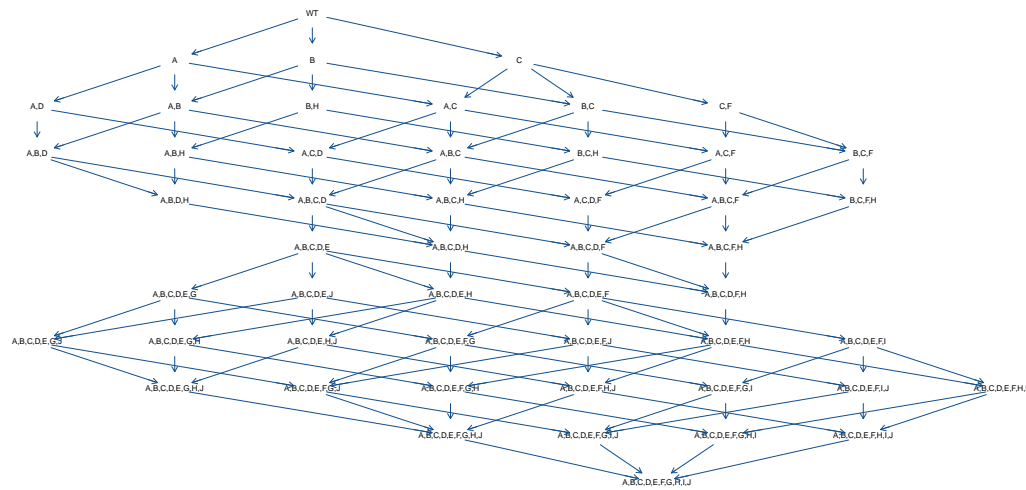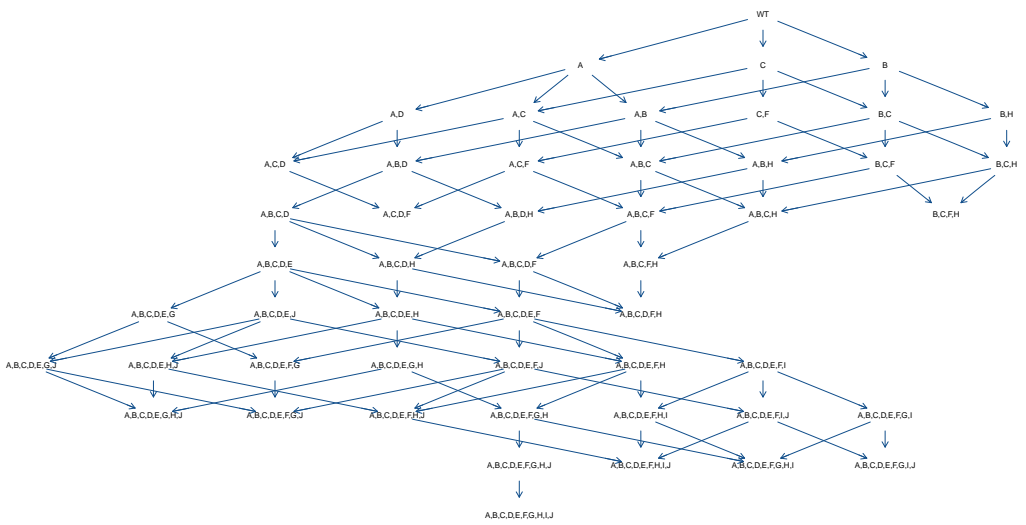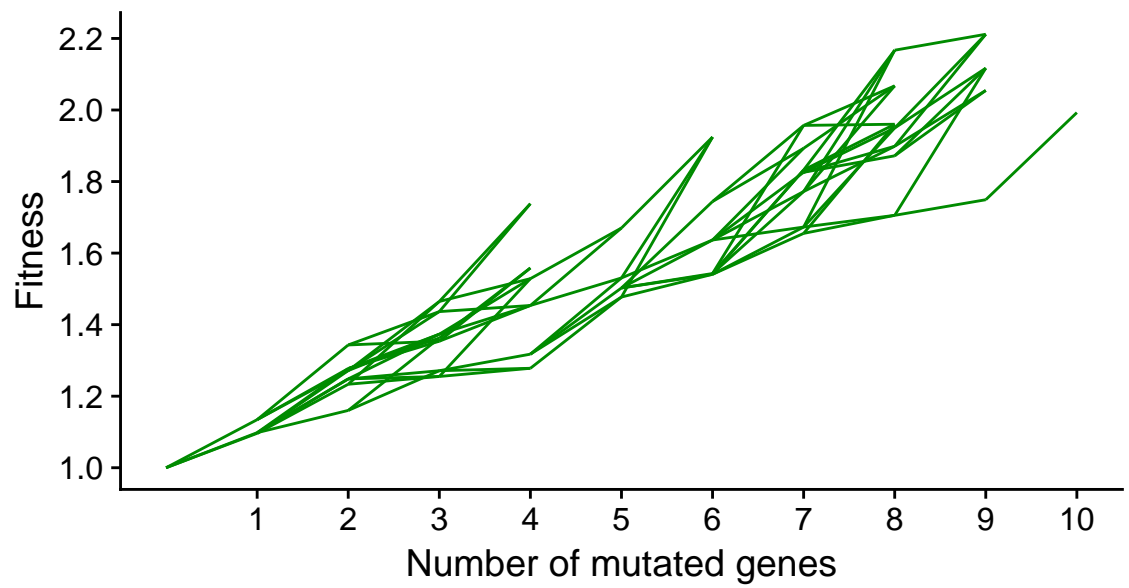

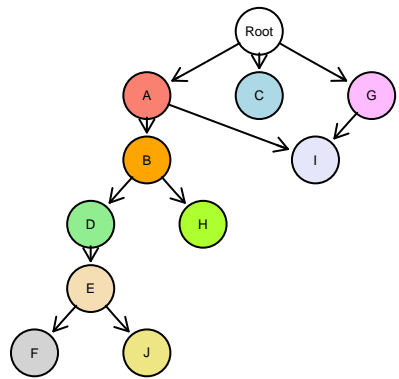

ID **XmnGrSjLnk1UkGT5**  
 acc genotypes **82**  
 peaks no back **12**  
 removed edges **57**  
 prop rem edges **0.268**

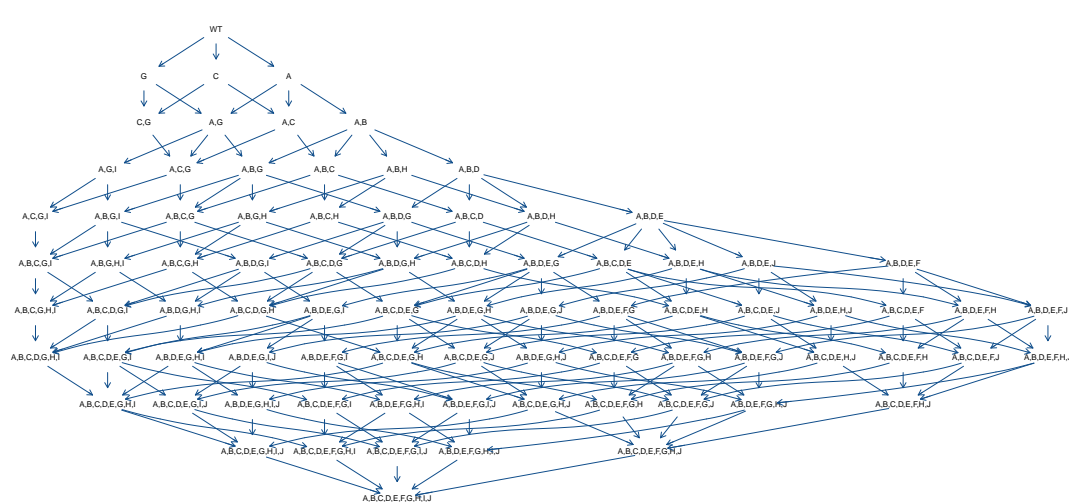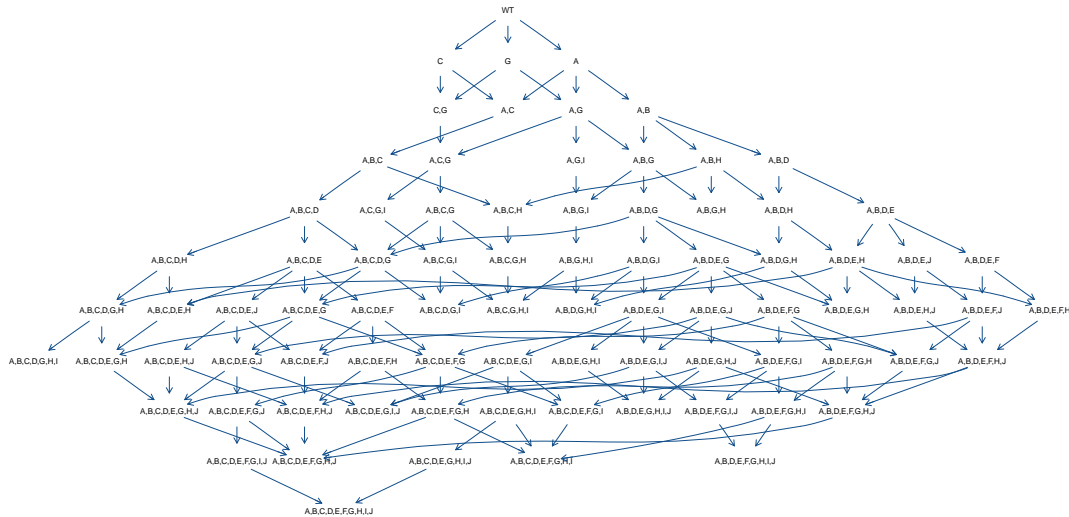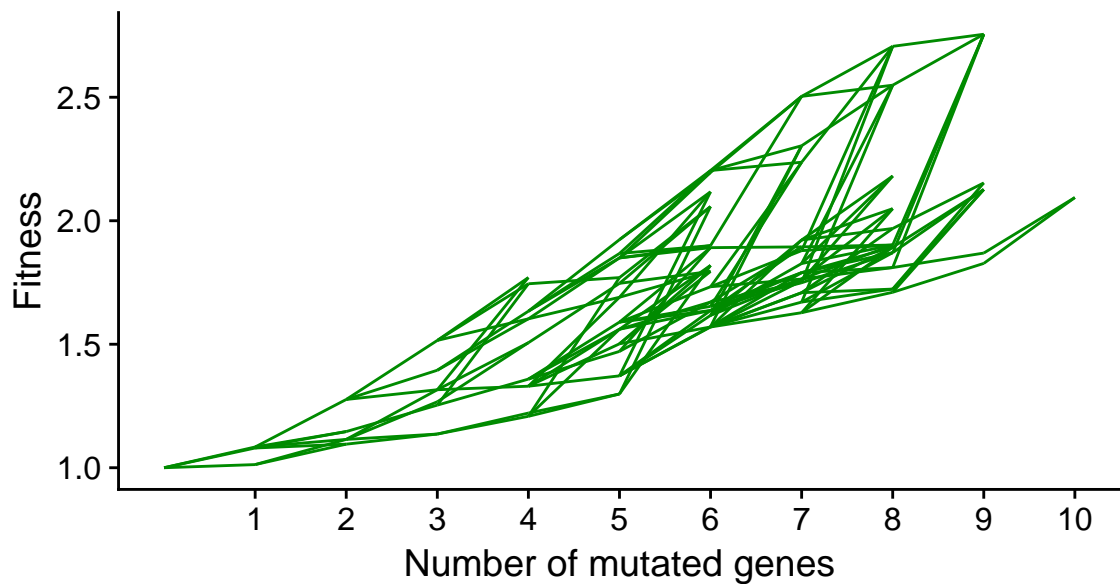

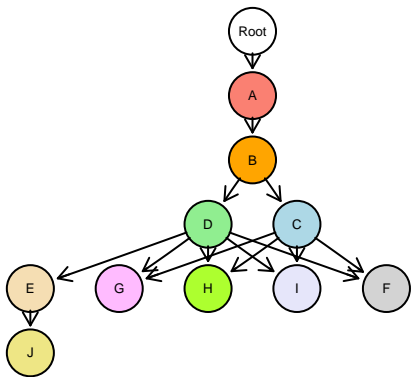

ID [y8uUVSfWKcZQiY4y](#)  
 acc genotypes 55  
 peaks no back 8  
 removed edges 22  
 prop rem edges 0.159

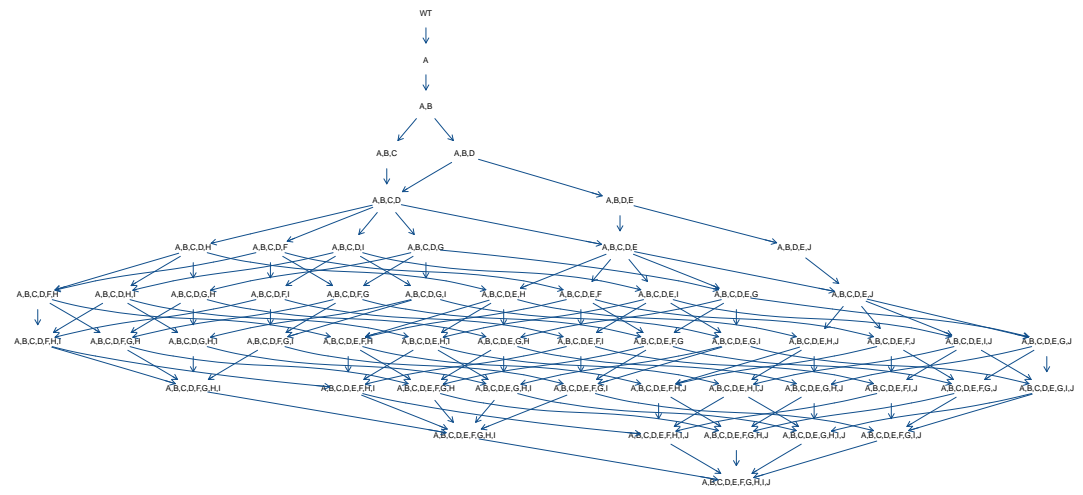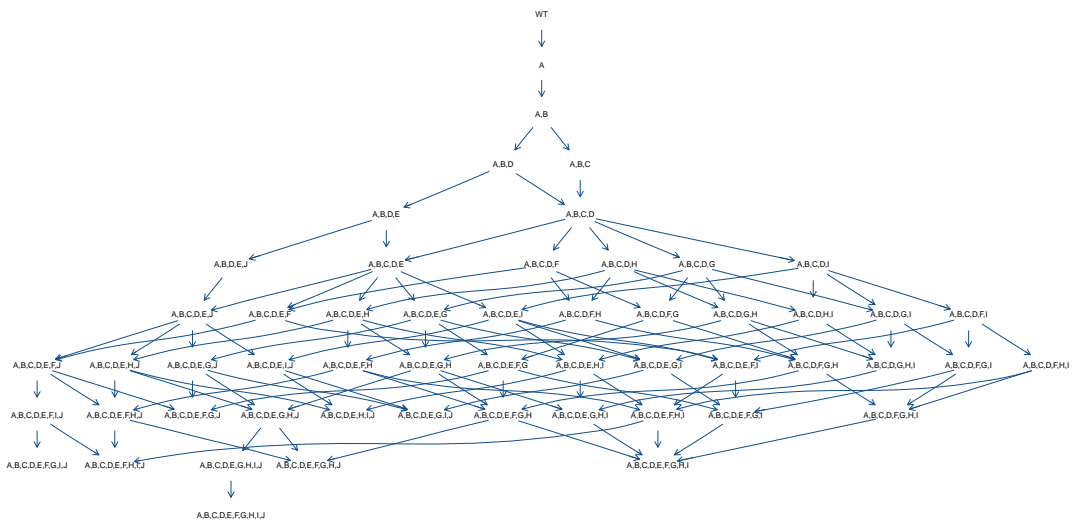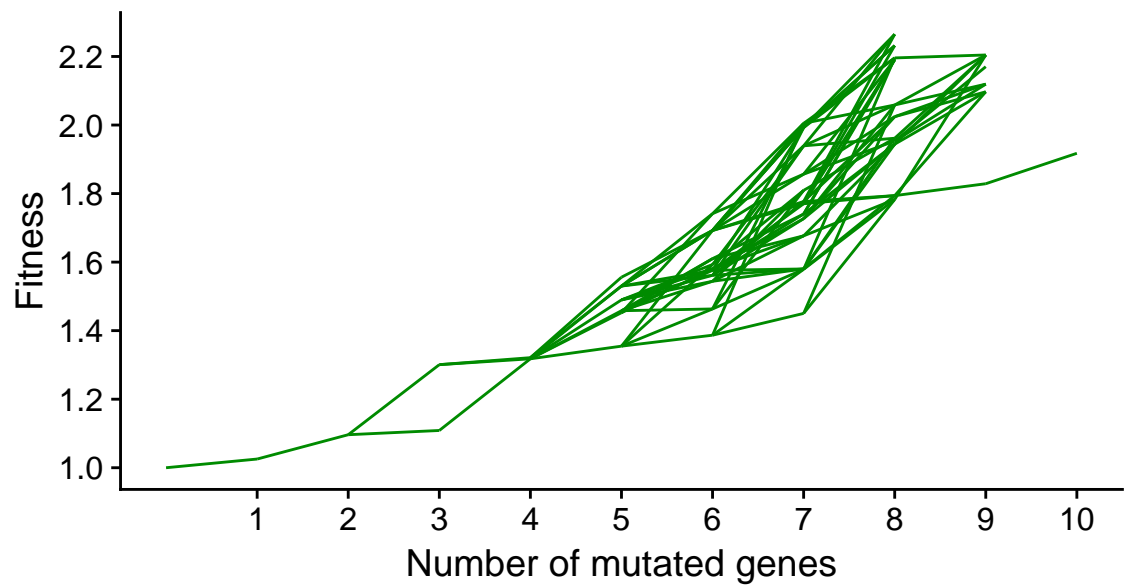

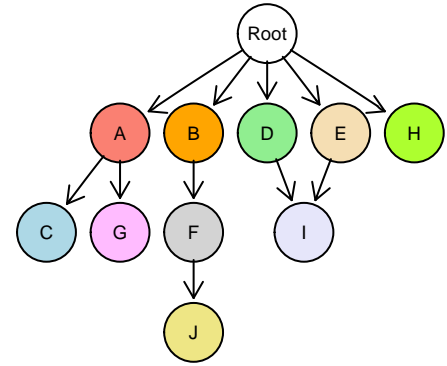

*ID* ypRiC10Qof6jAjsVJ  
*acc genotypes* 200  
*peaks no back* 18  
*removed edges* 112  
*prop rem edges* 0.172

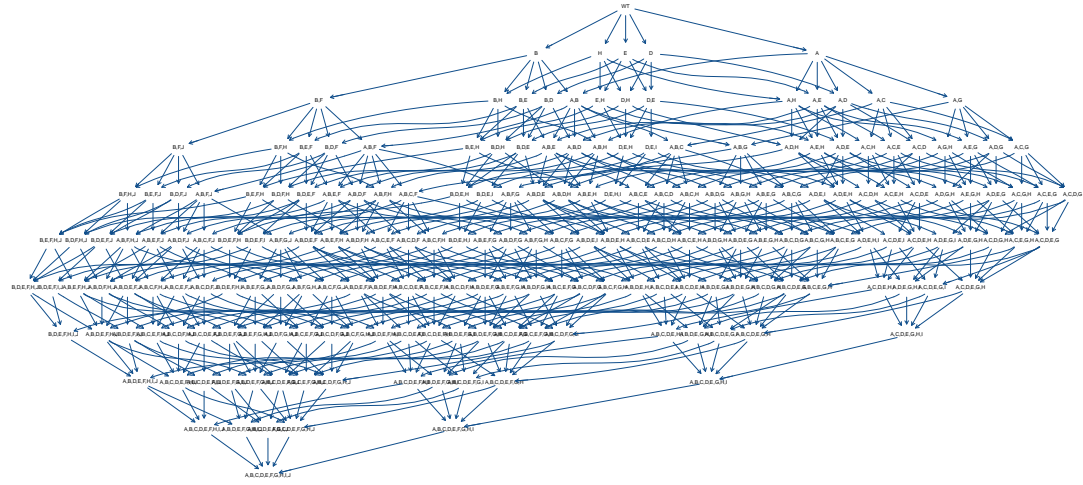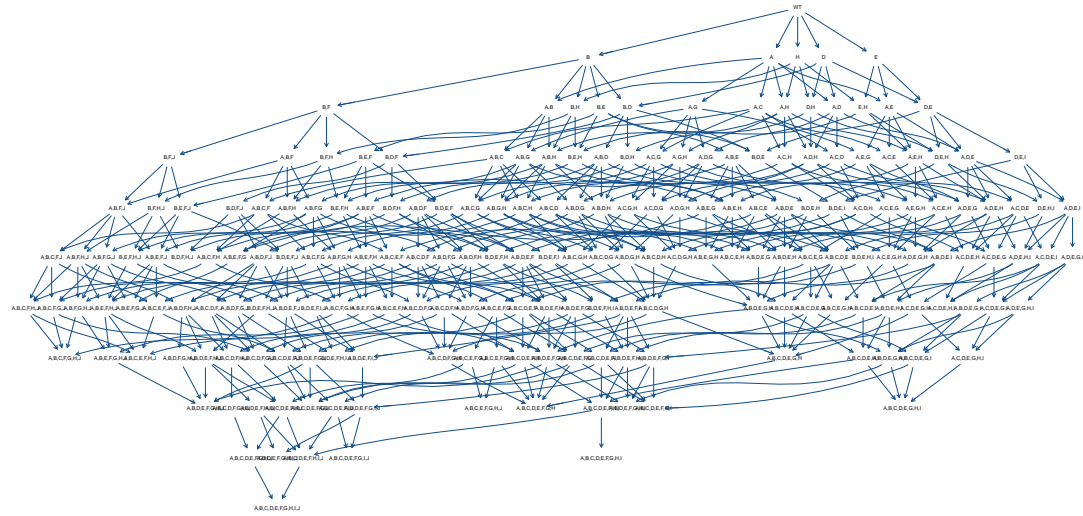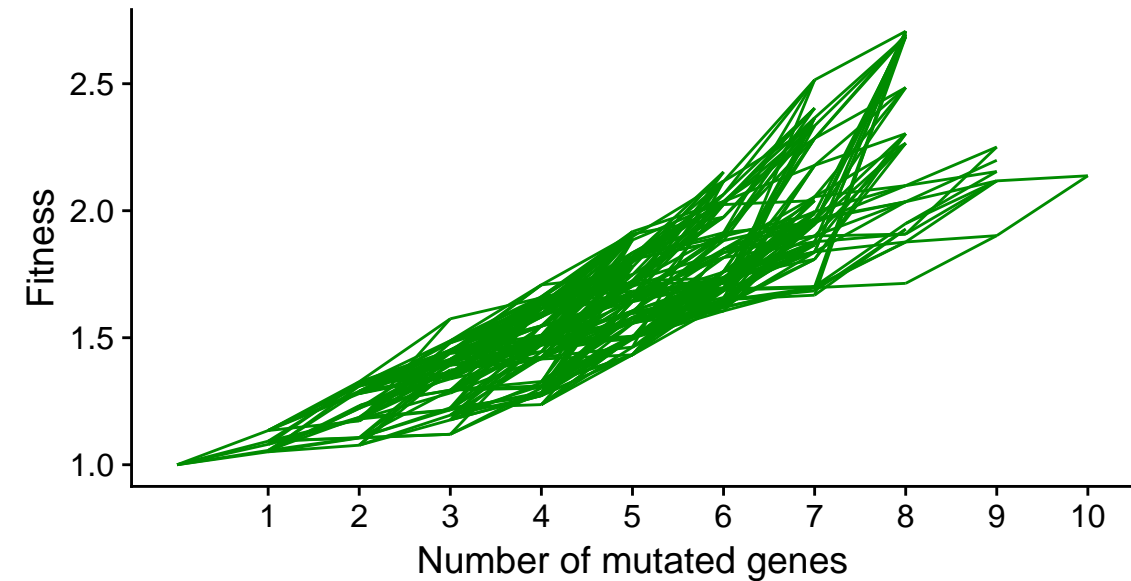

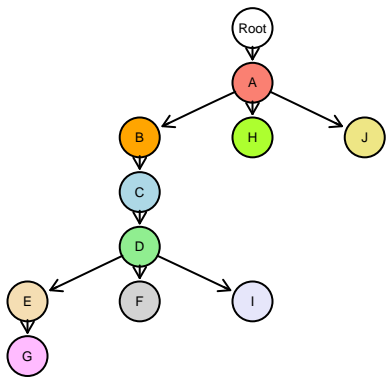

ID **YW7KQxwKMle2i7ar**  
 acc genotypes **61**  
 peaks no back **9**  
 removed edges **28**  
 prop rem edges **0.183**

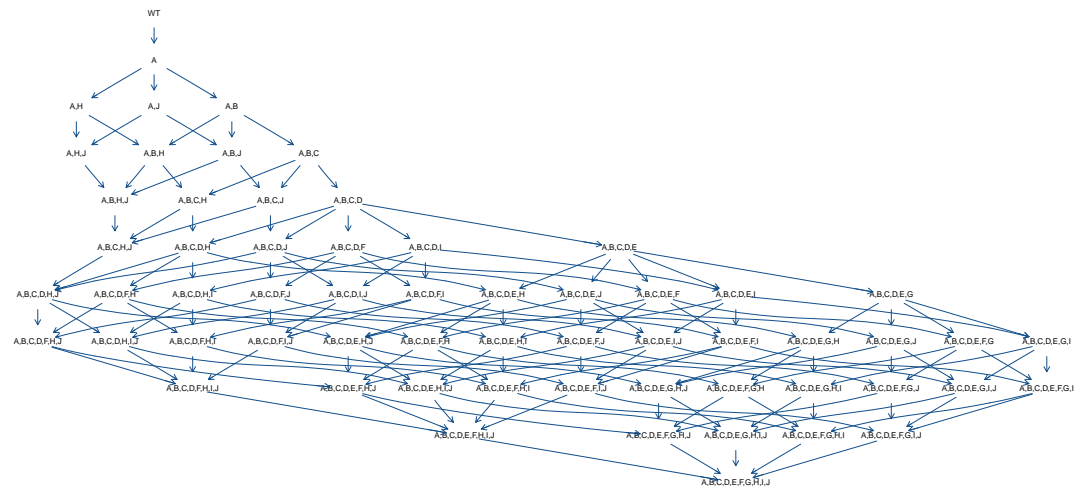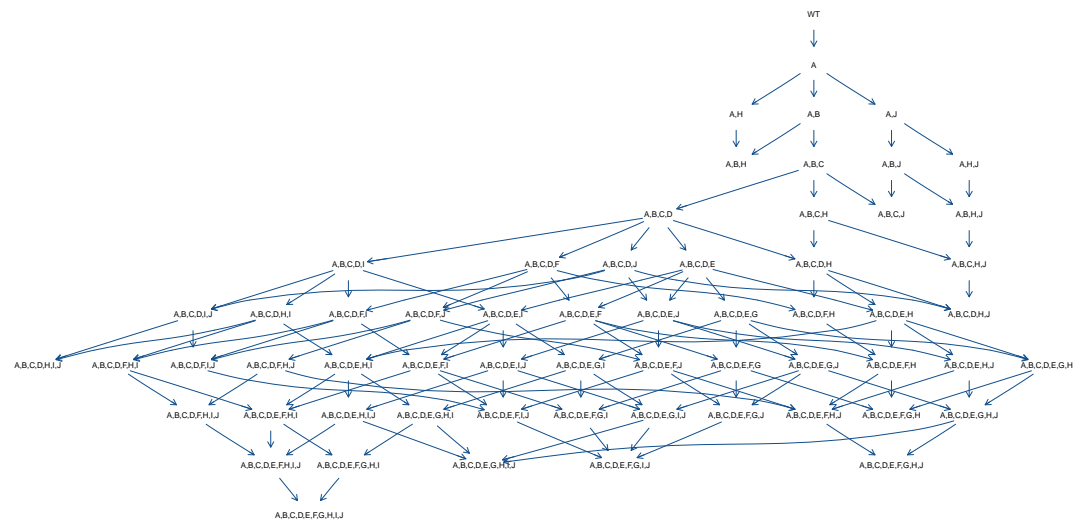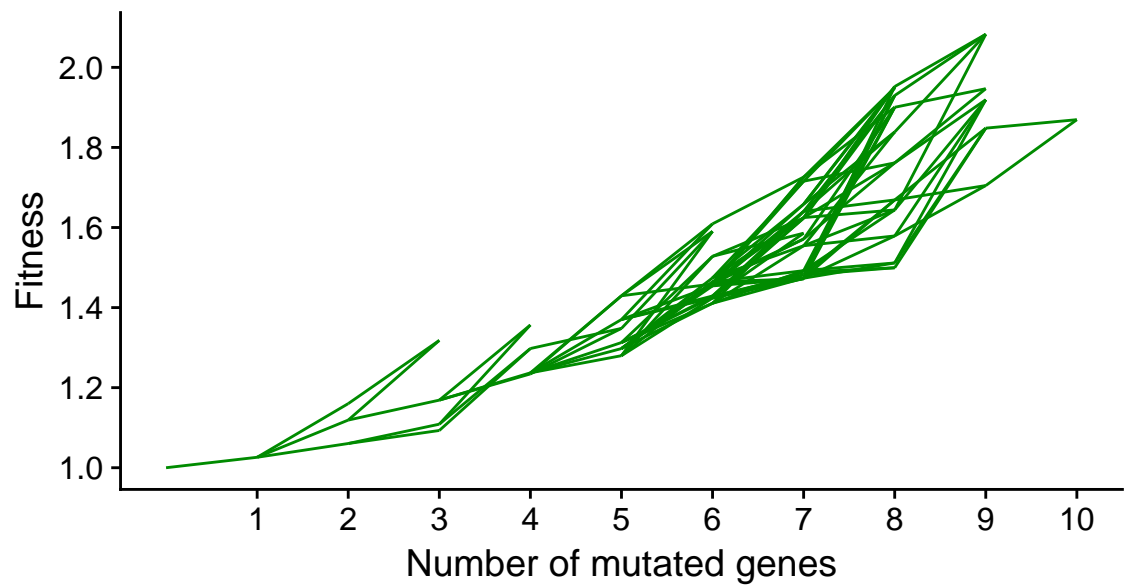

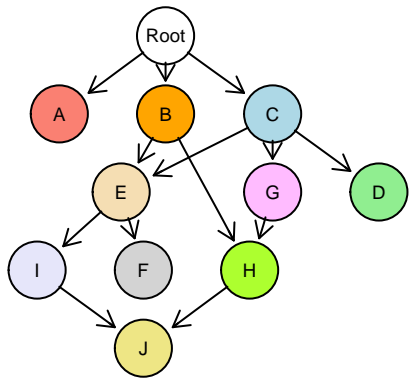

ID **z4RVEoFHLg5dwFWI**  
 acc genotypes **80**  
 peaks no back **9**  
 removed edges **44**  
 prop rem edges **0.212**

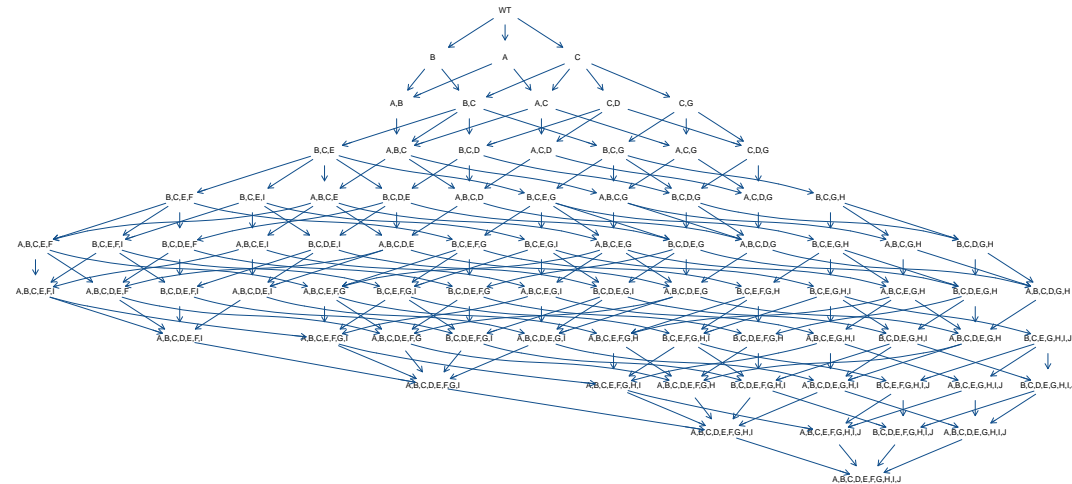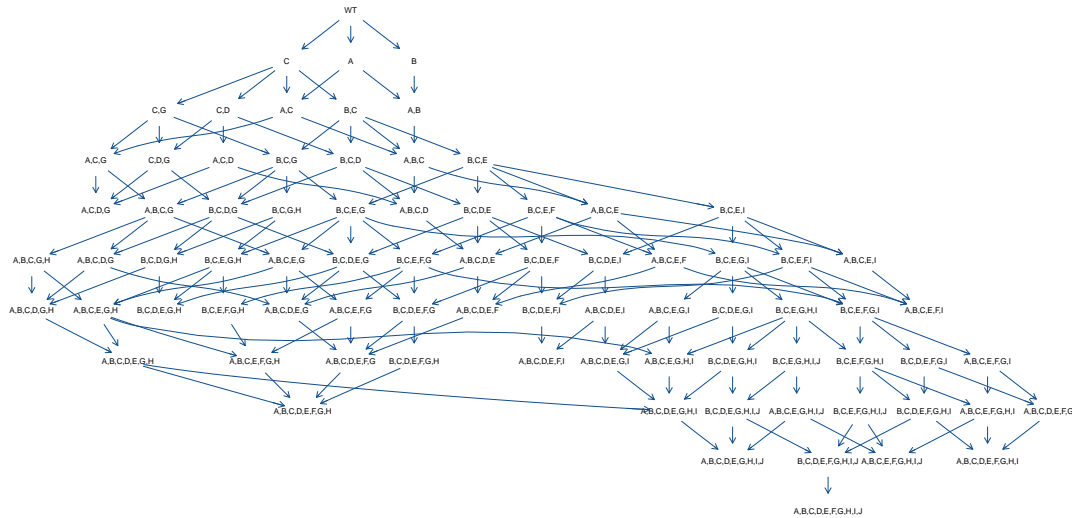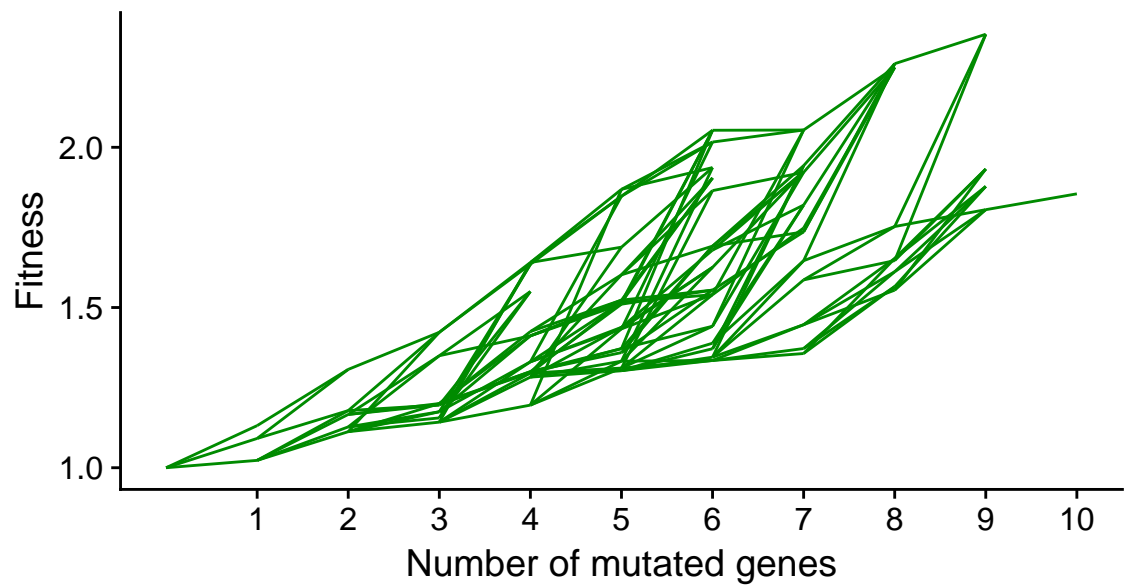



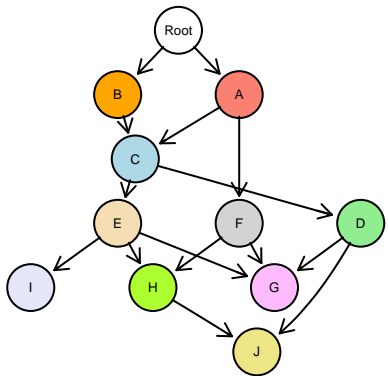

ID **zAMK2D5LDmq9X37r**  
 acc genotypes **30**  
 peaks no back **2**  
 removed edges **3**  
 prop rem edges **0.057**

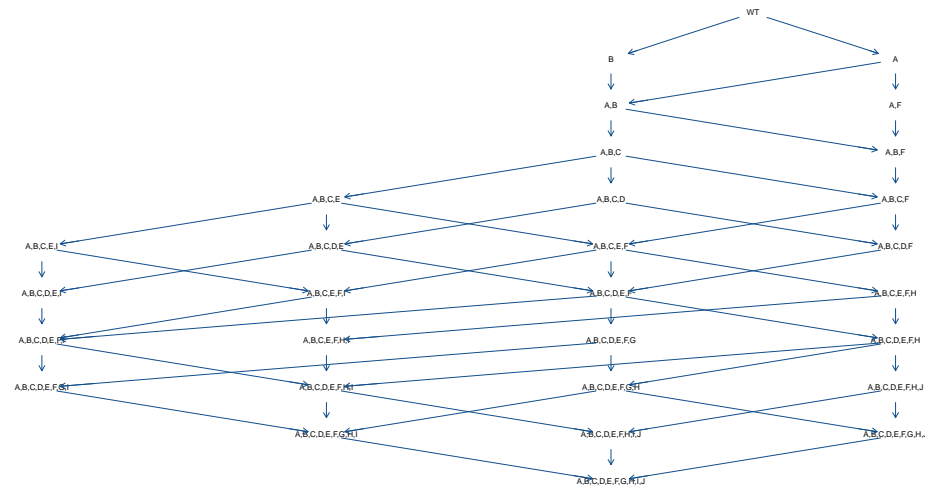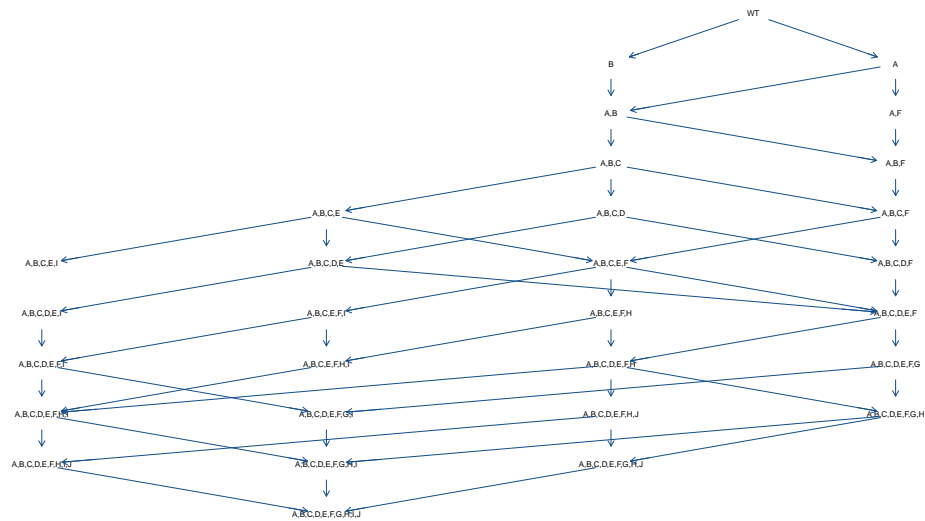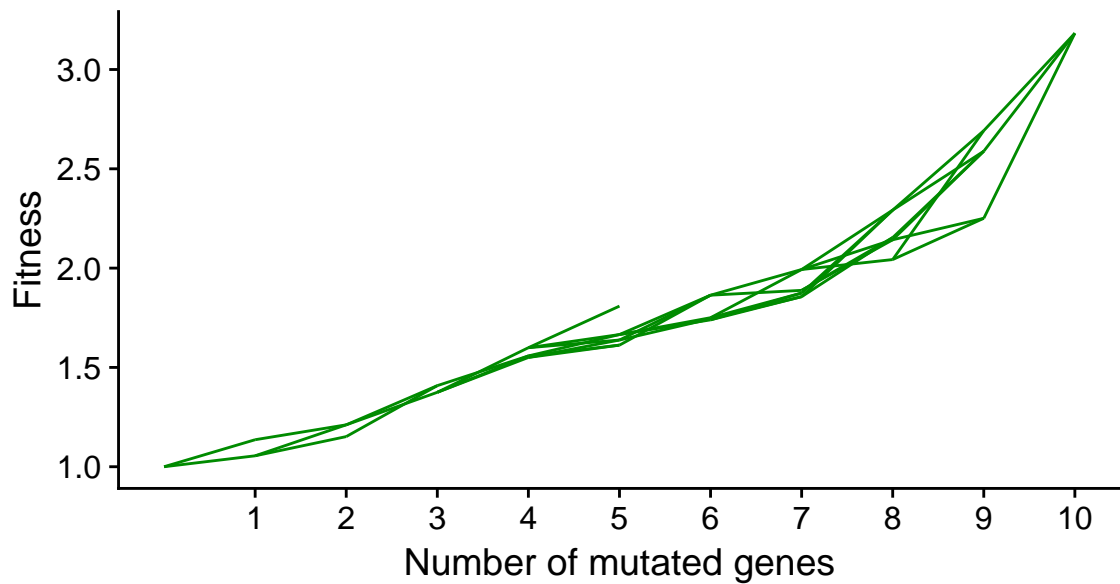

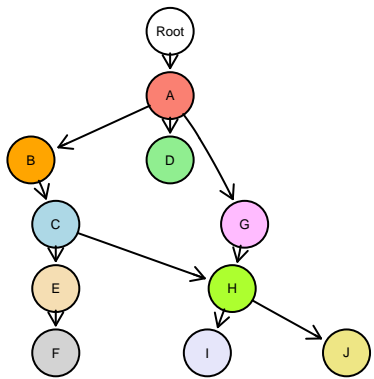

ID ZIBdVWiOnxT3sPfl  
 acc genotypes 45  
 peaks no back 7  
 removed edges 11  
 prop rem edges 0.116

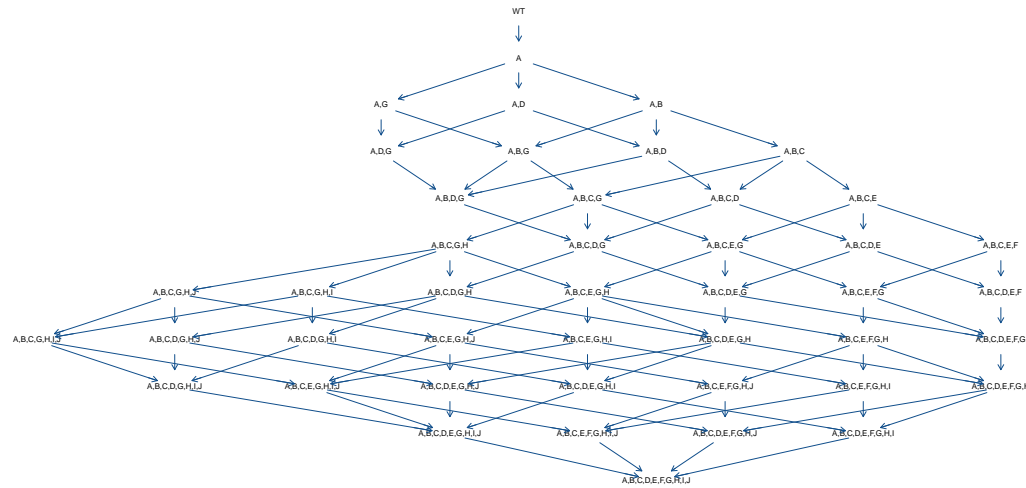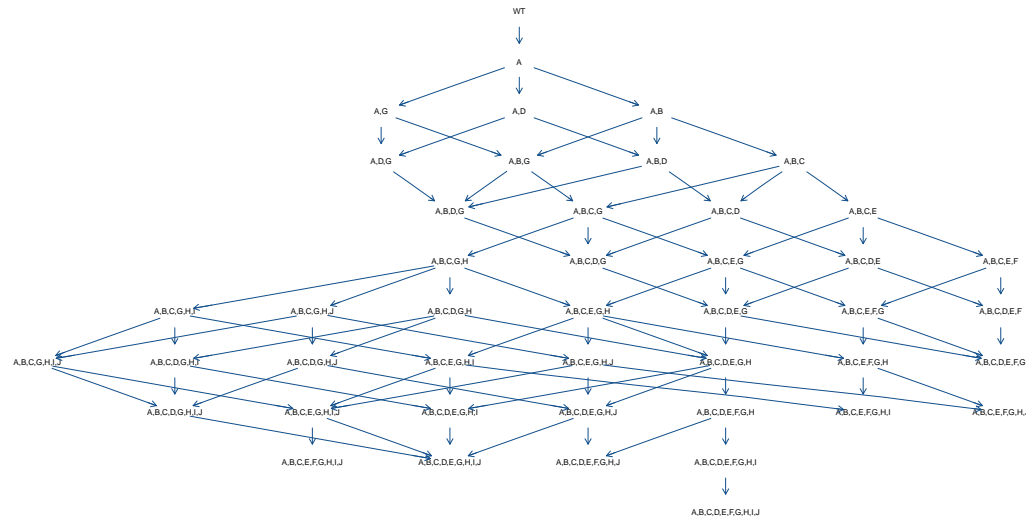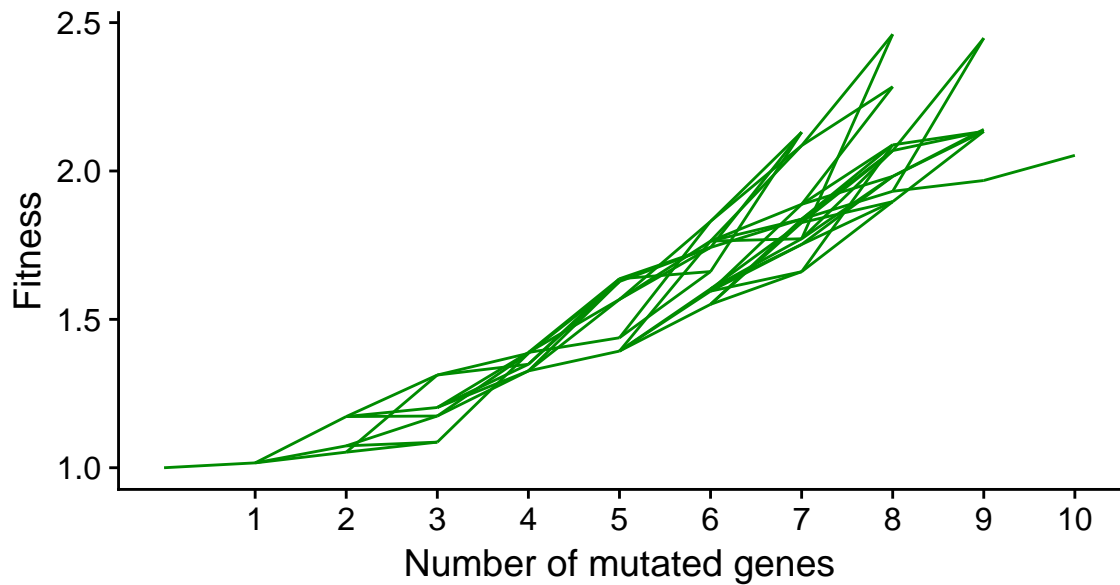

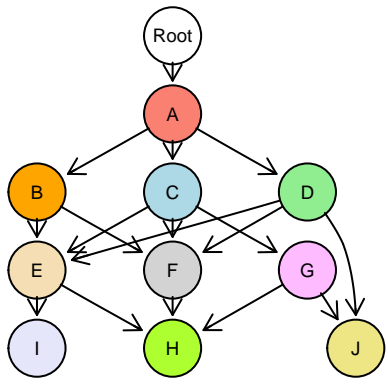

ID **zJtfsaG9cK5j5Hnm**  
 acc genotypes **34**  
 peaks no back **5**  
 removed edges **12**  
 prop rem edges **0.19**

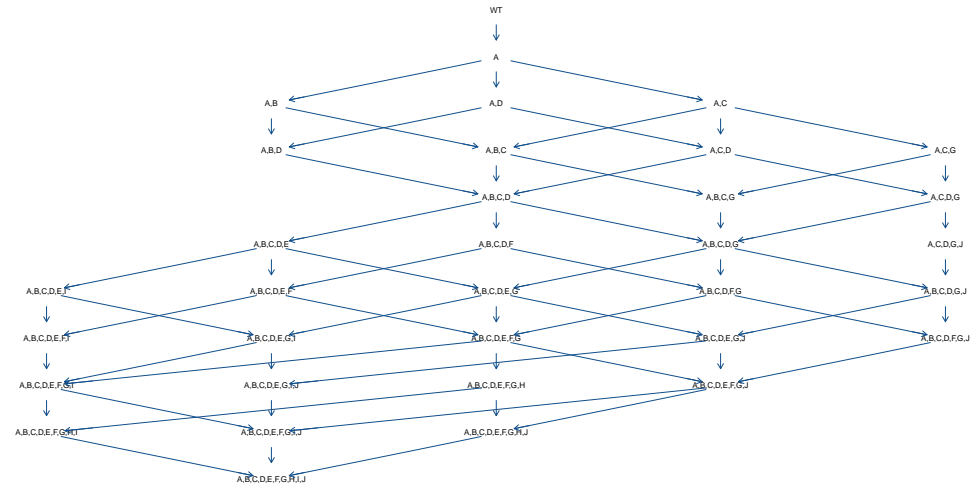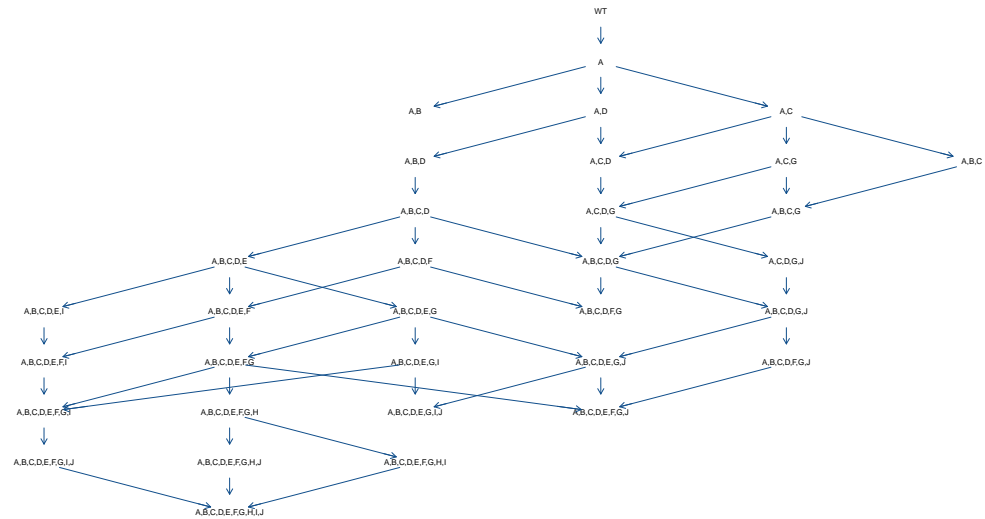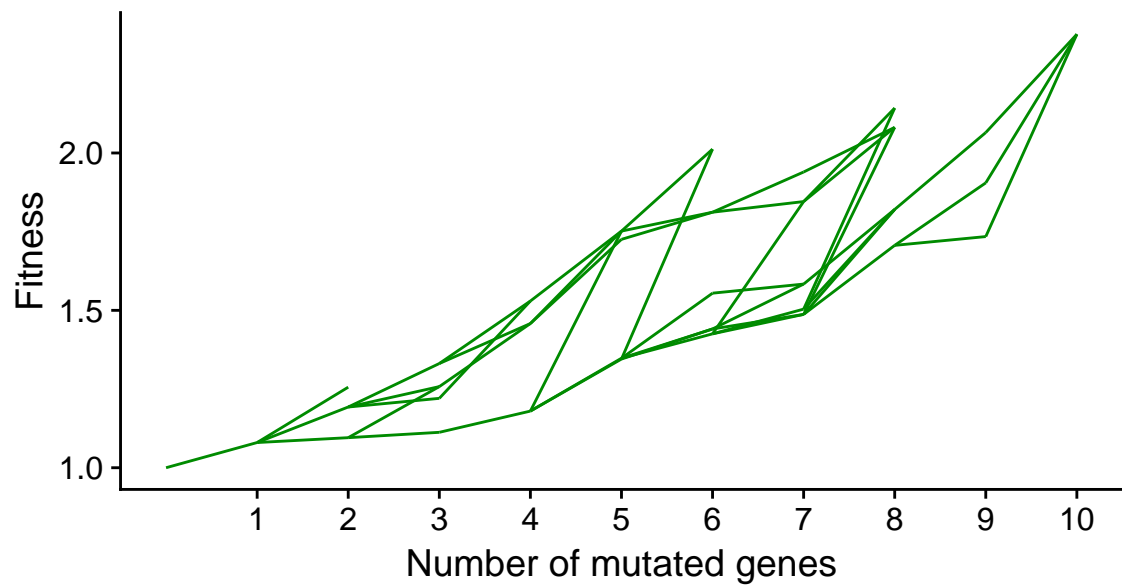

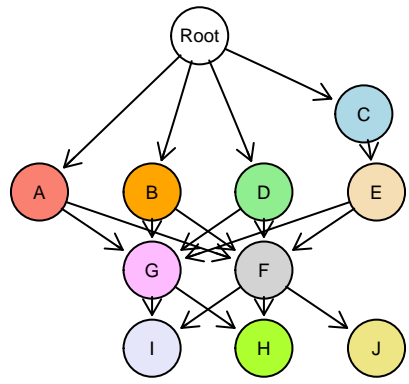

ID **ZKH10YvDZGVfsdHAY**  
 acc genotypes **35**  
 peaks no back 6  
 removed edges 9  
 prop rem edges 0.129

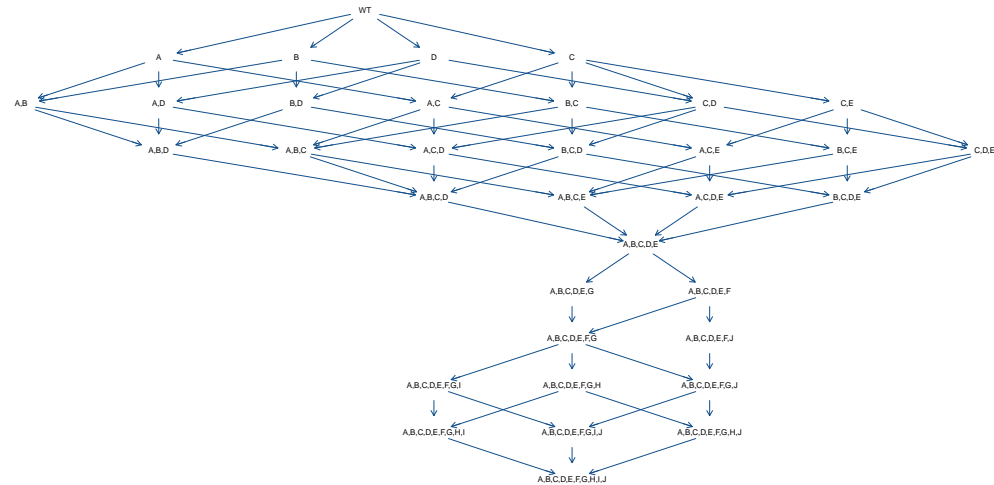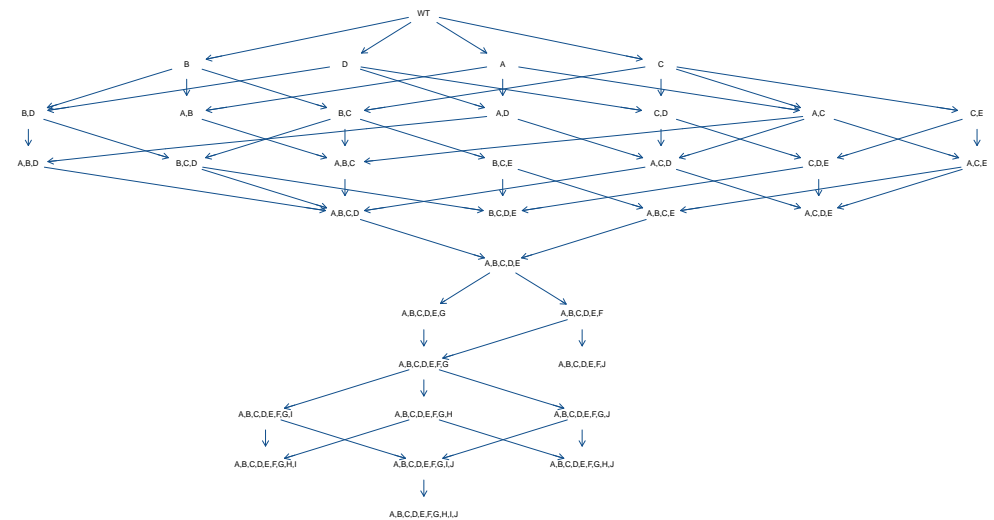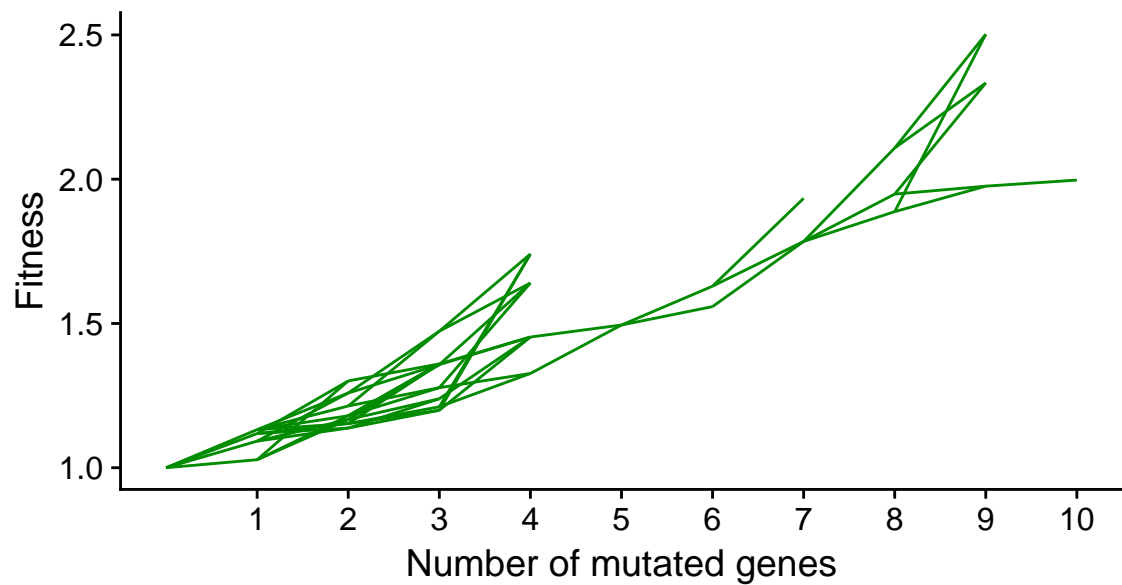

ID 103oxrJDcbfc2YpKa  
 acc genotypes 162  
 peaks no back 57  
 removed edges NA  
 prop rem edges NA

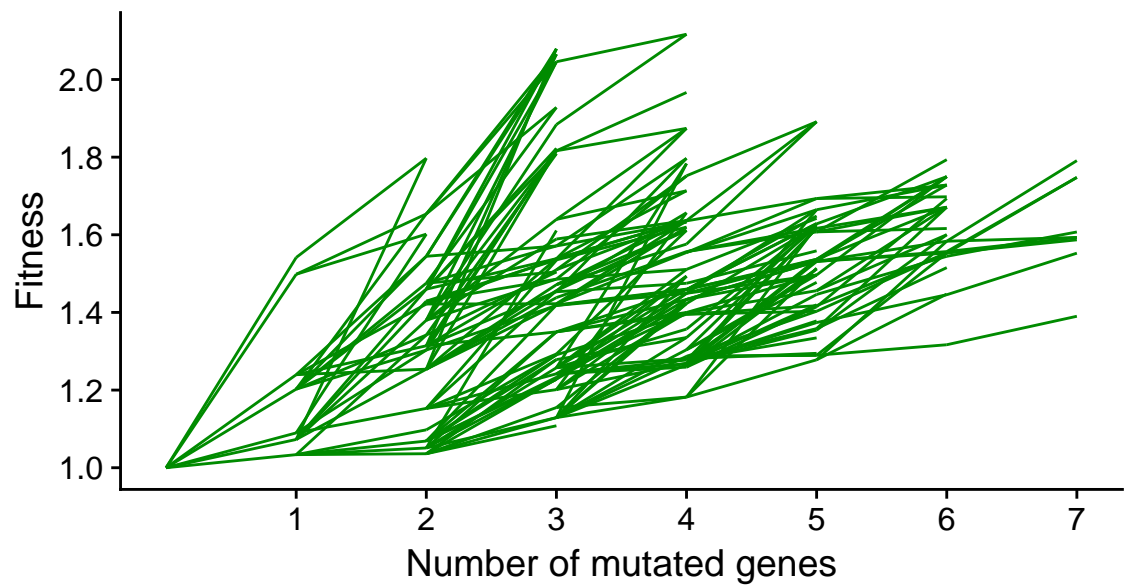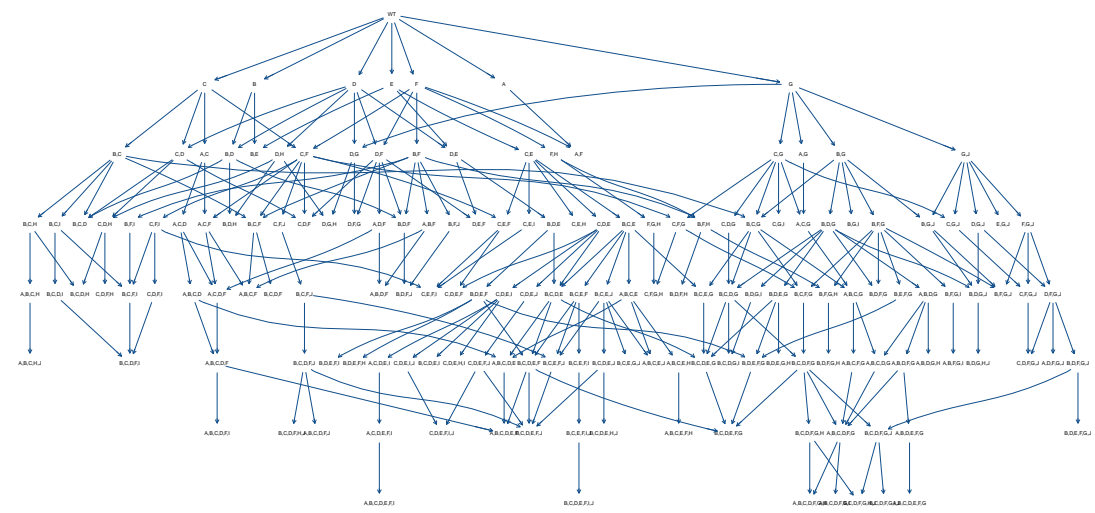

ID 10aJ10EAqKH7VA3ccp  
 acc genotypes 79  
 peaks no back 26  
 removed edges NA  
 prop rem edges NA

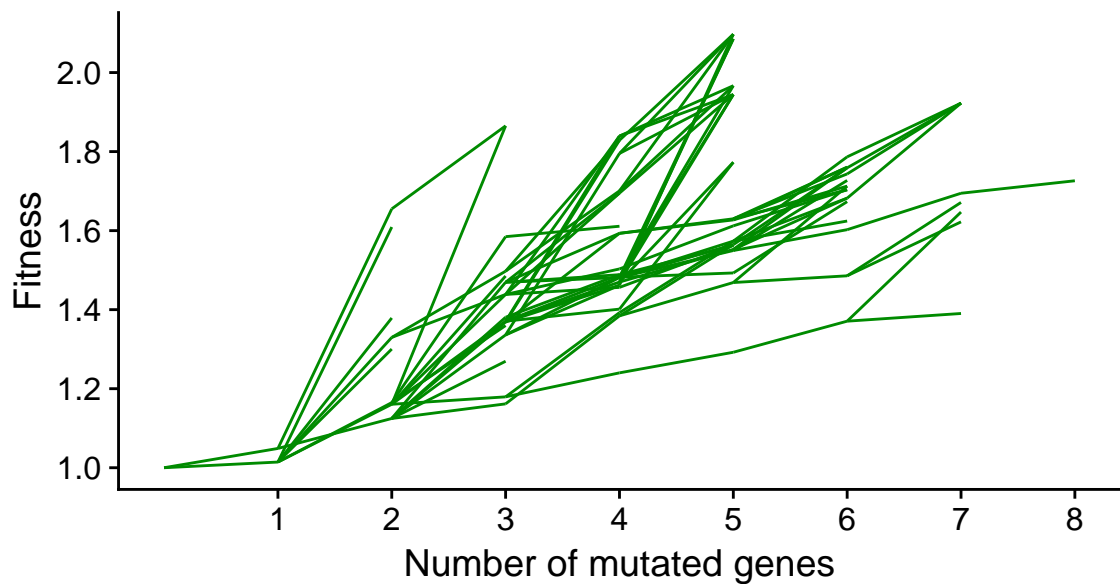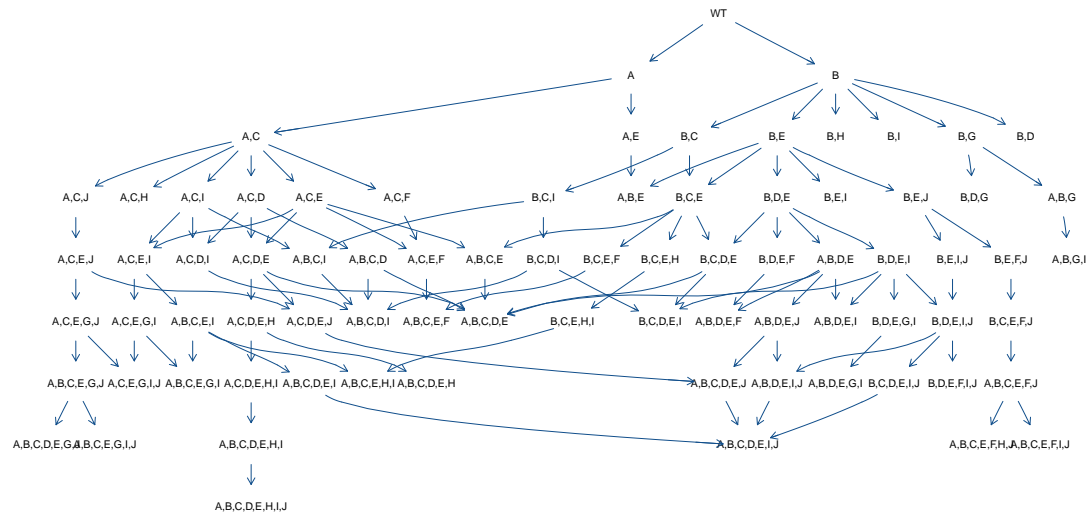

ID 10fyev4yPOAHqV3G4  
 acc genotypes 72  
 peaks no back 33  
 removed edges NA  
 prop rem edges NA

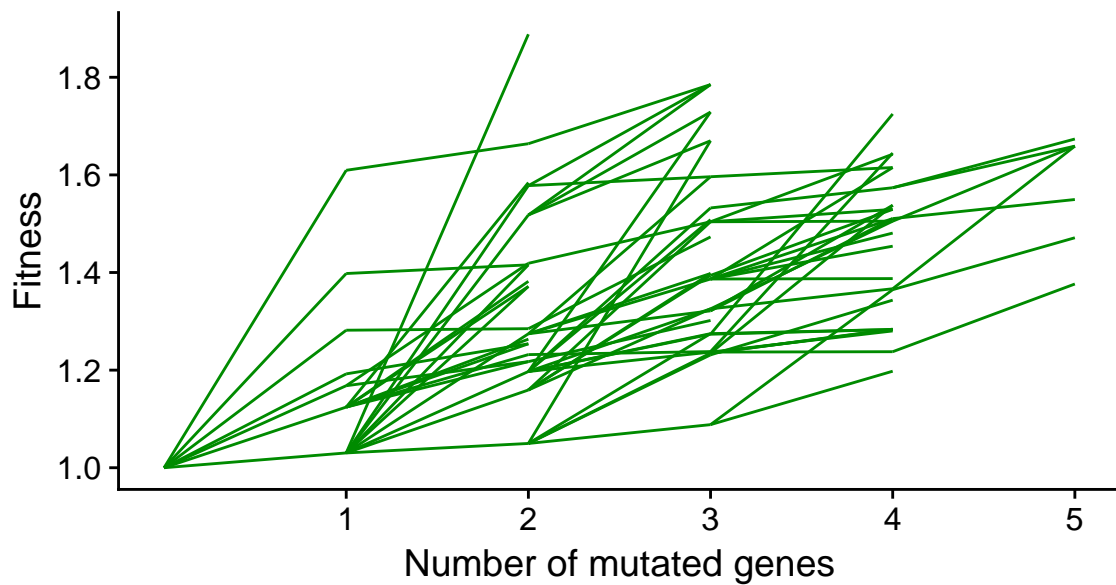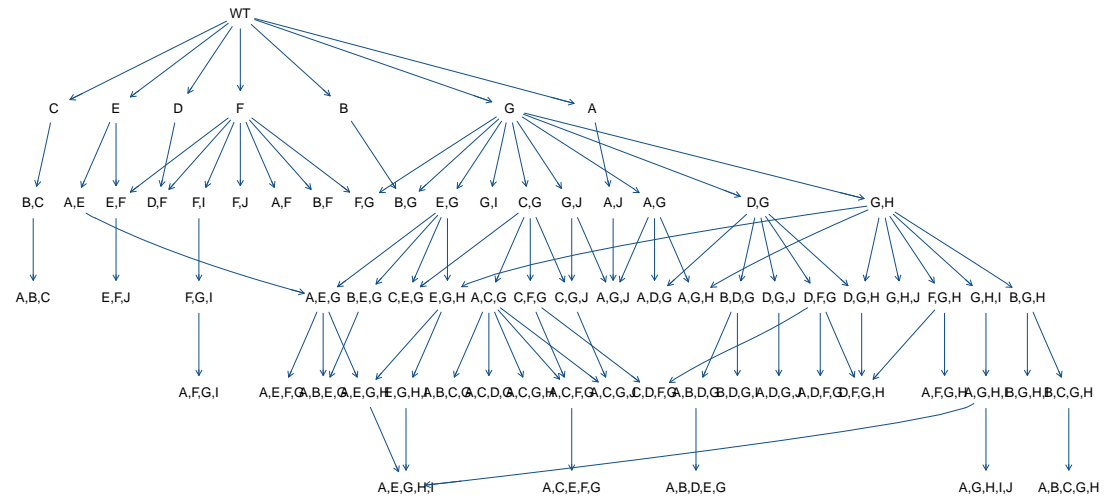

*ID* 10NjHwdZ4eQZuBASX  
*acc genotypes* 326  
*peaks no back* 116  
*removed edges* NA  
*prop rem edges* NA

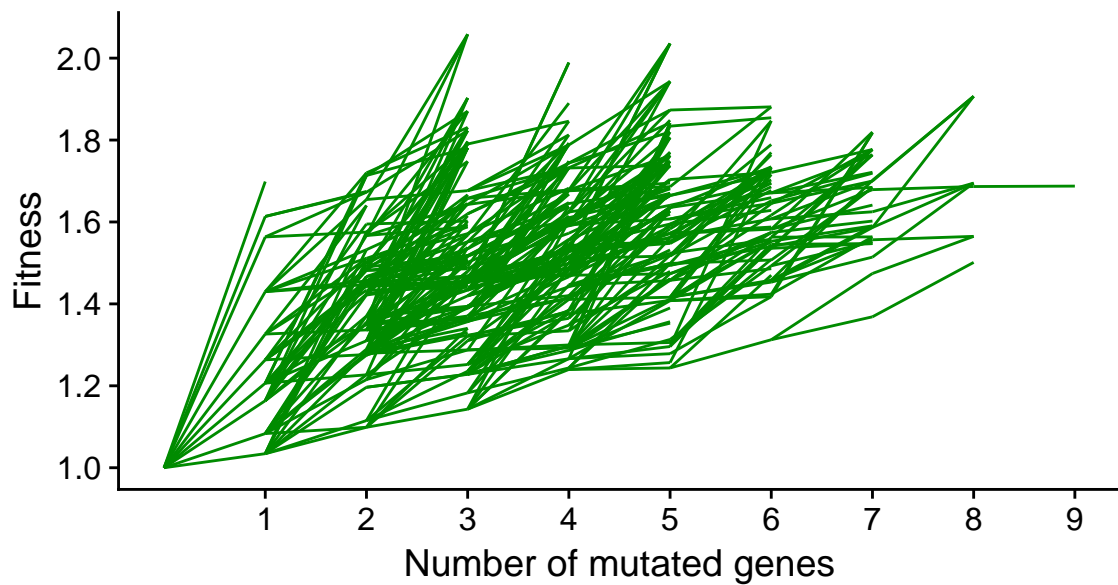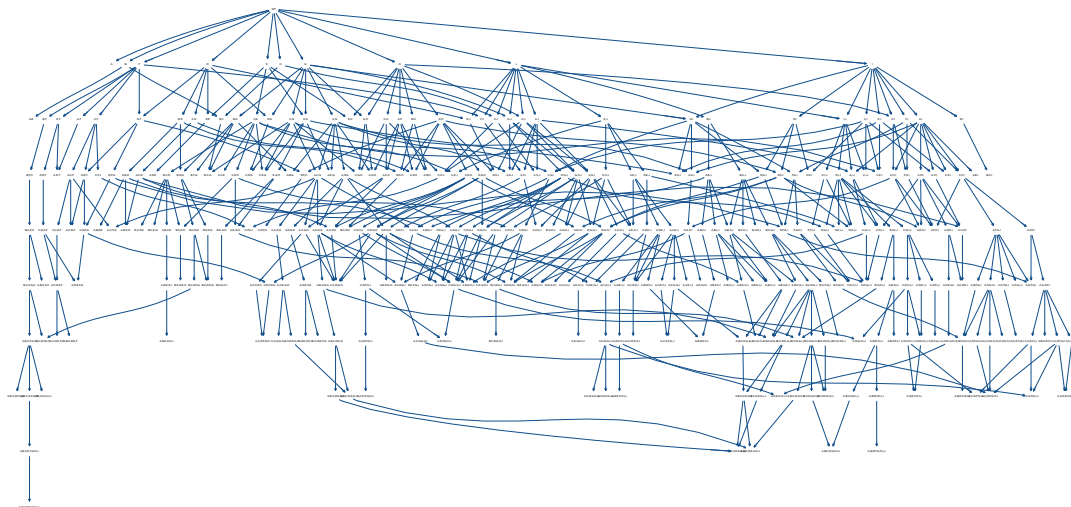



*ID* 10rm10ycggF6sUPqCV  
*acc genotypes* 330  
*peaks no back* 87  
*removed edges* NA  
*prop rem edges* NA

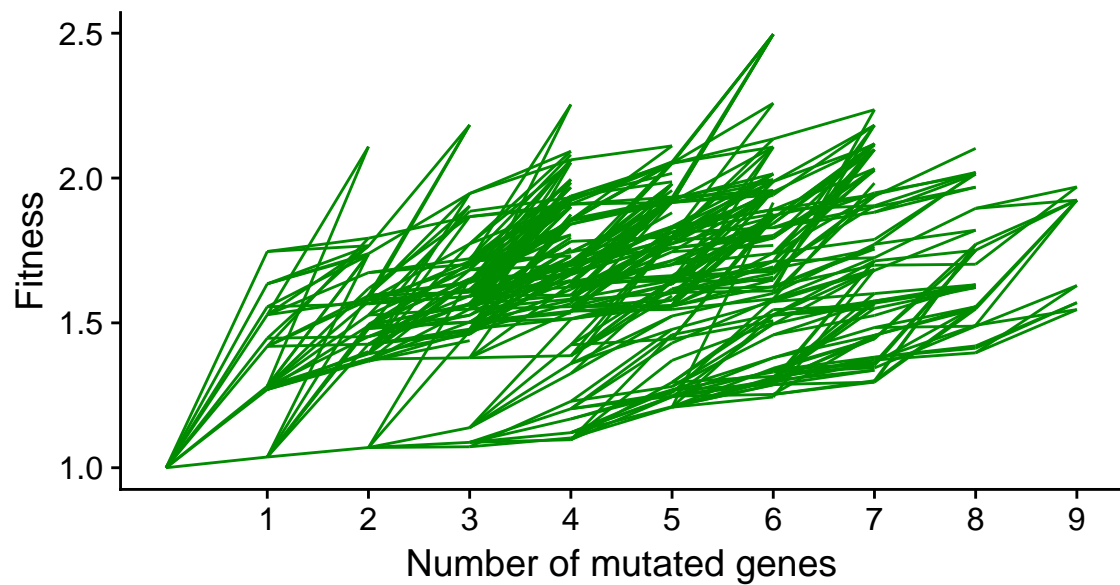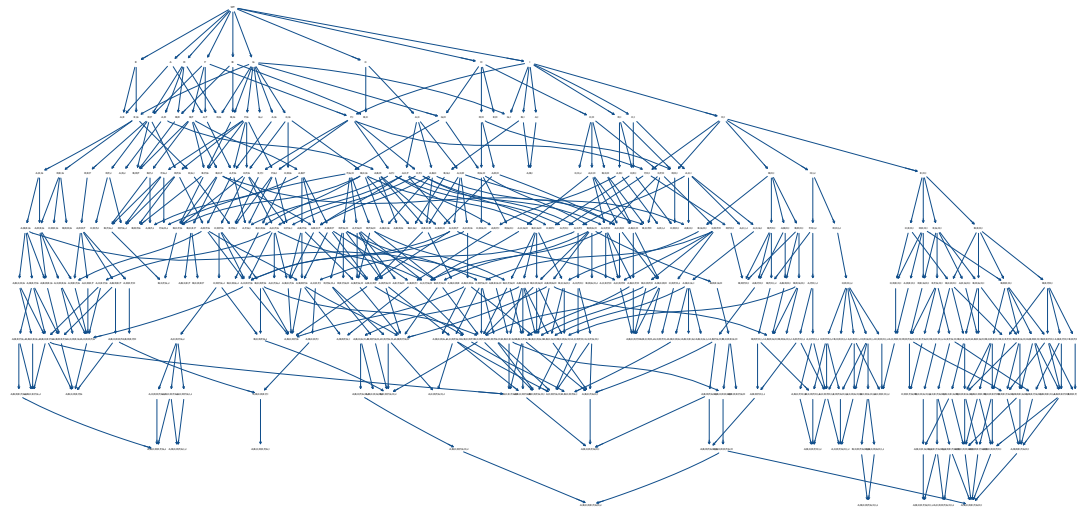

ID 10yJX7cQ5FF31Qv6f  
 acc genotypes 95  
 peaks no back 36  
 removed edges NA  
 prop rem edges NA

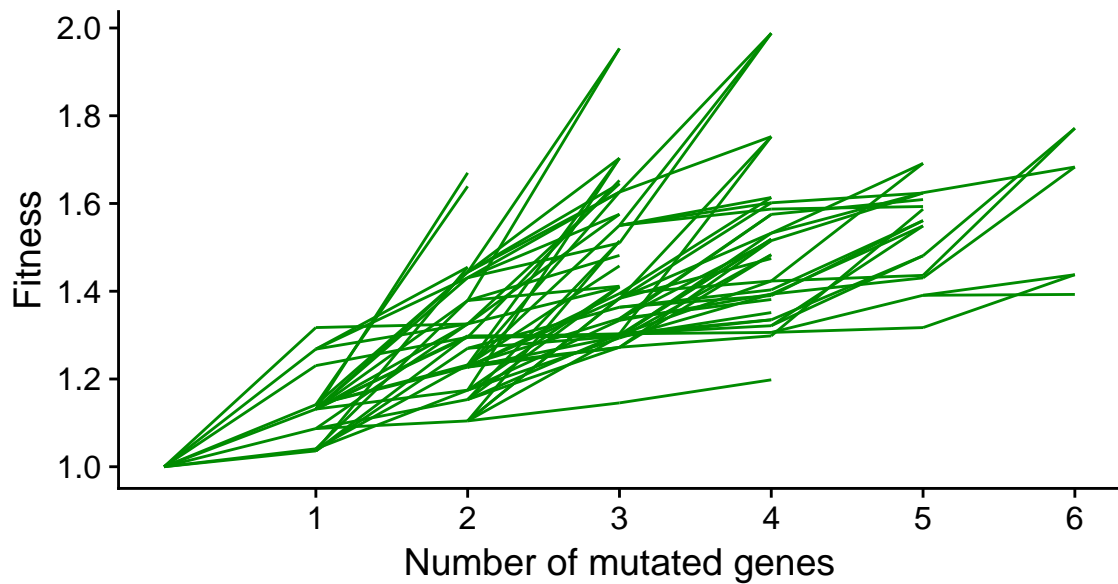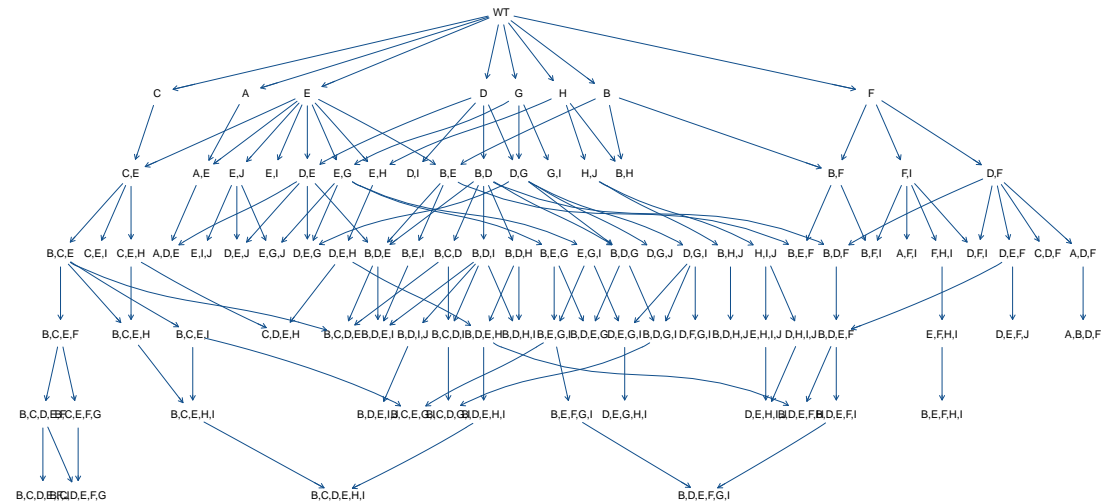

*ID* 1aUzp7cAshgfTICQ  
*acc genotypes* 44  
*peaks no back* 16  
*removed edges* NA  
*prop rem edges* NA

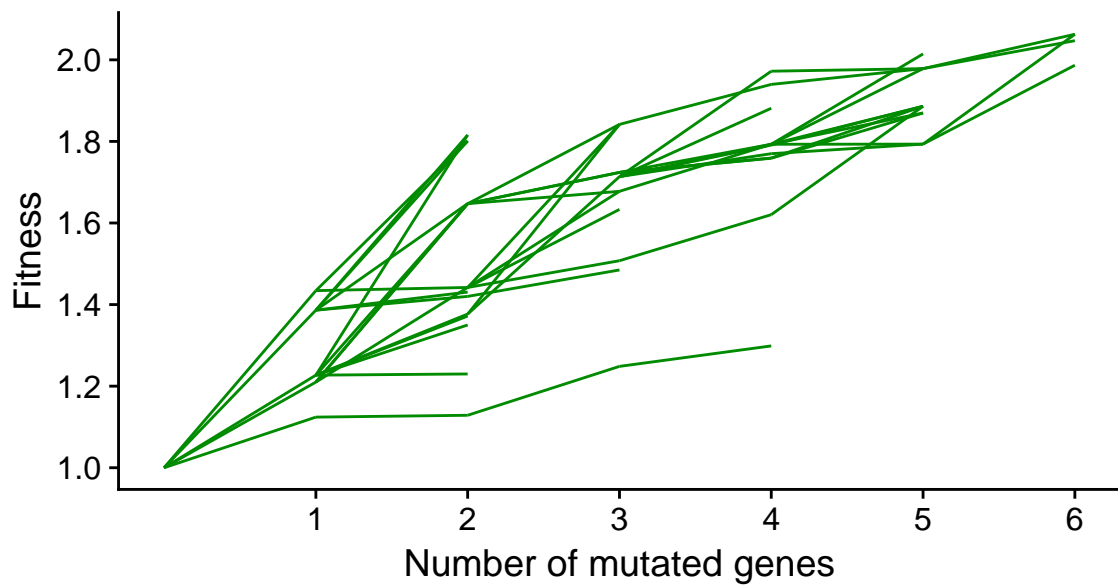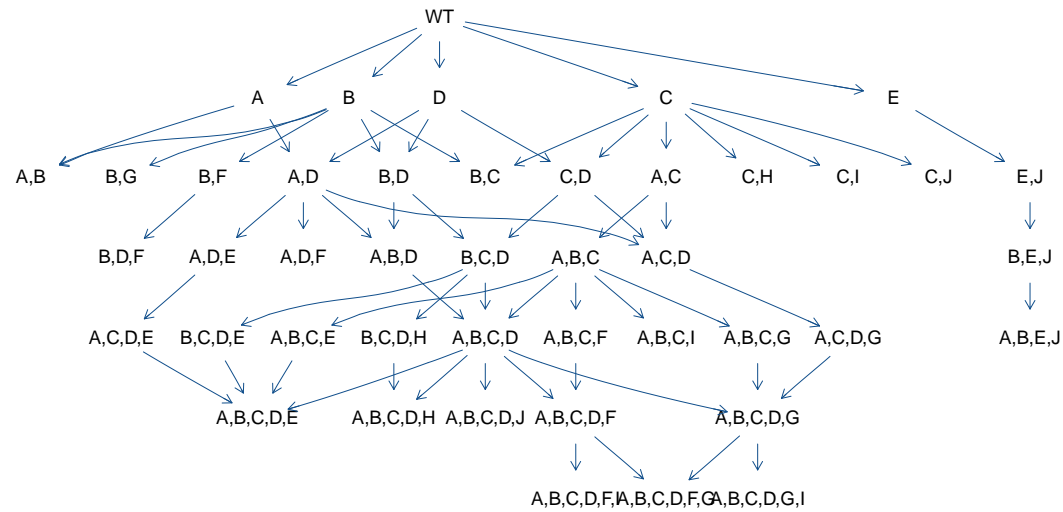

*ID* 1QFuLHW10HcmHRTX10  
*acc genotypes* 217  
*peaks no back* 81  
*removed edges* NA  
*prop rem edges* NA

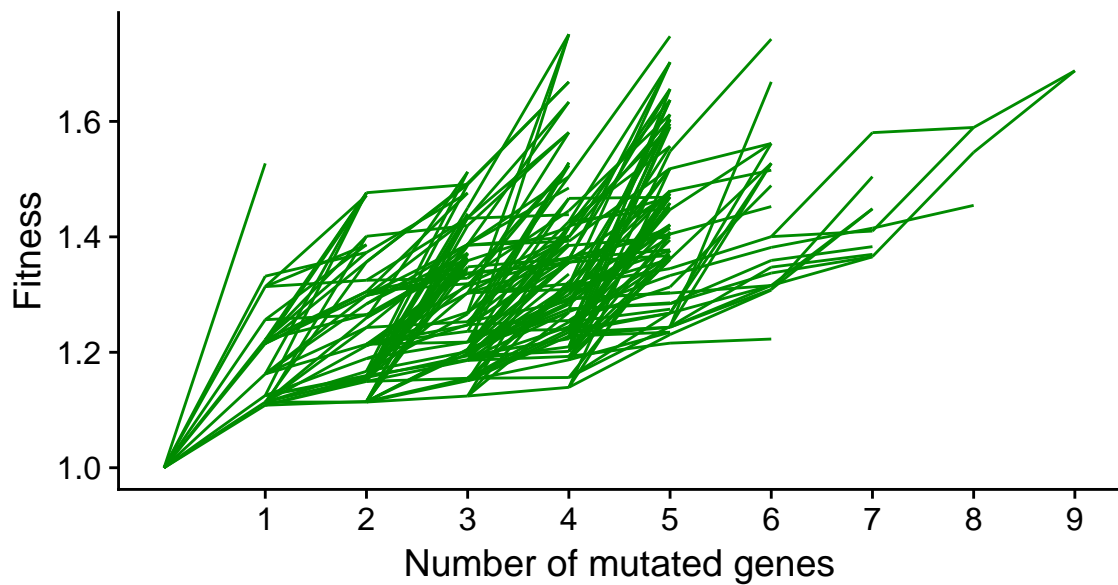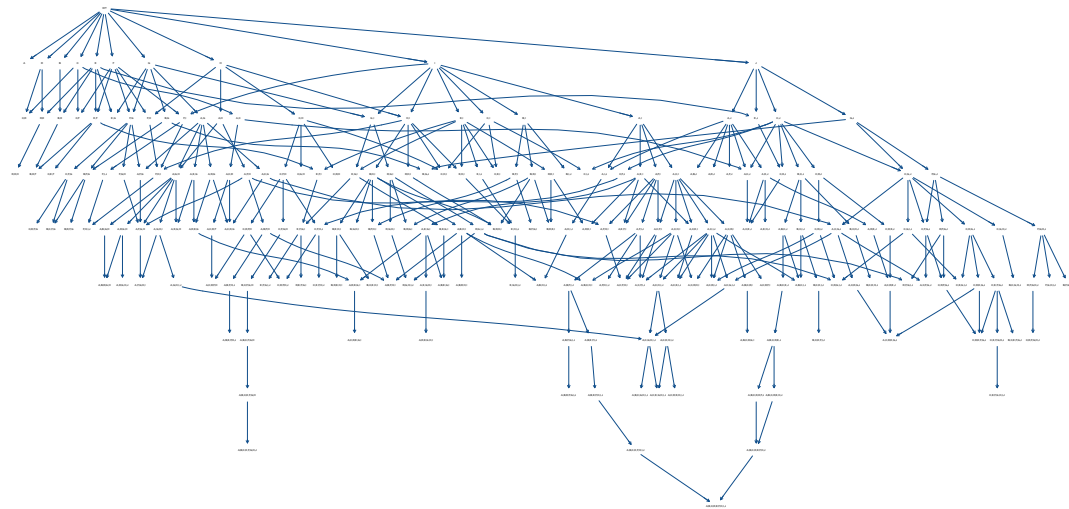

*ID* 2HoRF1oKBcGNaQYL  
*acc genotypes* 597  
*peaks no back* 113  
*removed edges* NA  
*prop rem edges* NA

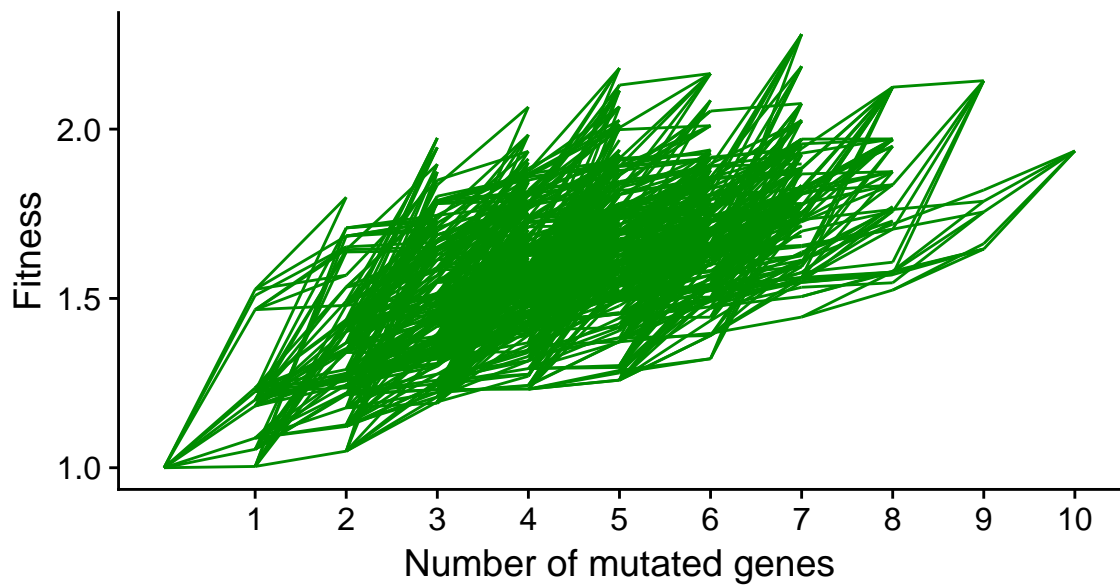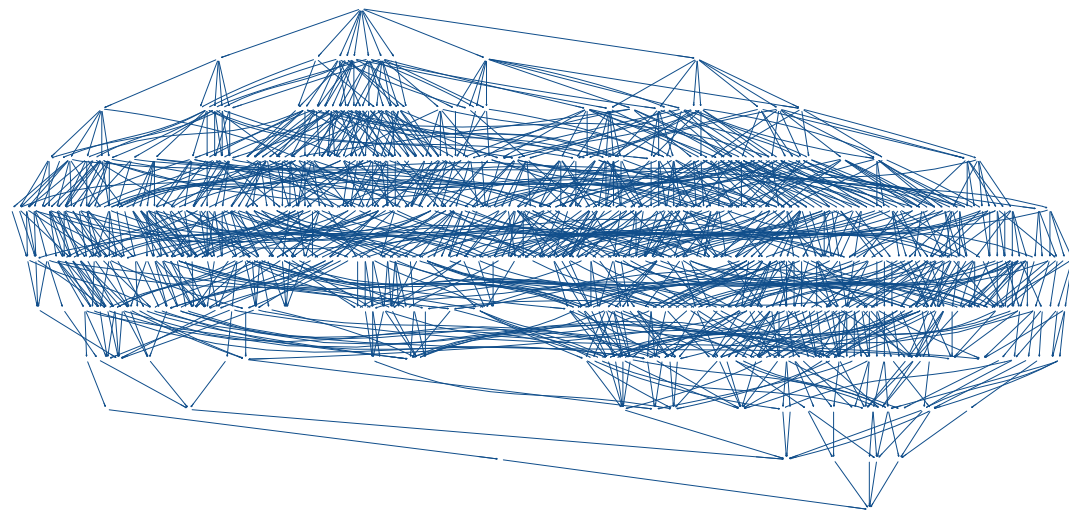

ID 2Ytm5OoPJh10Hnzle  
acc genotypes 52  
peaks no back 13  
removed edges NA  
prop rem edges NA

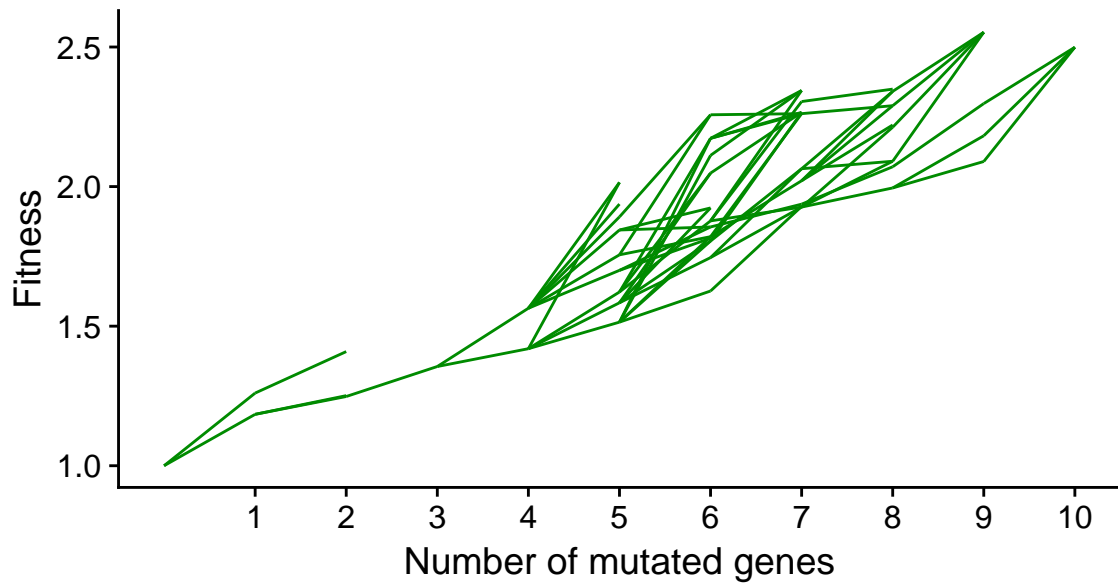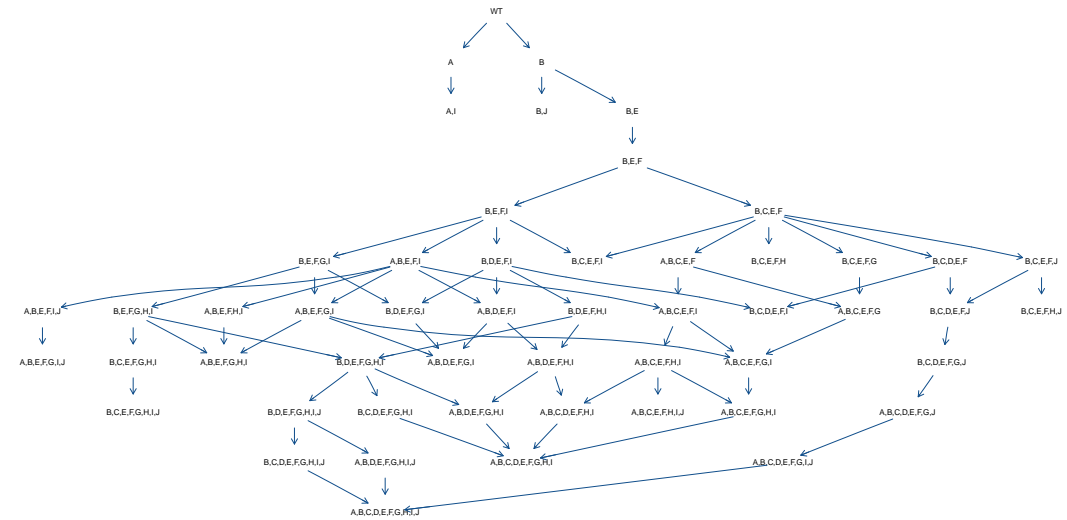

*ID* 2yuFuKxbV3XC3194  
*acc genotypes* 282  
*peaks no back* 63  
*removed edges* NA  
*prop rem edges* NA

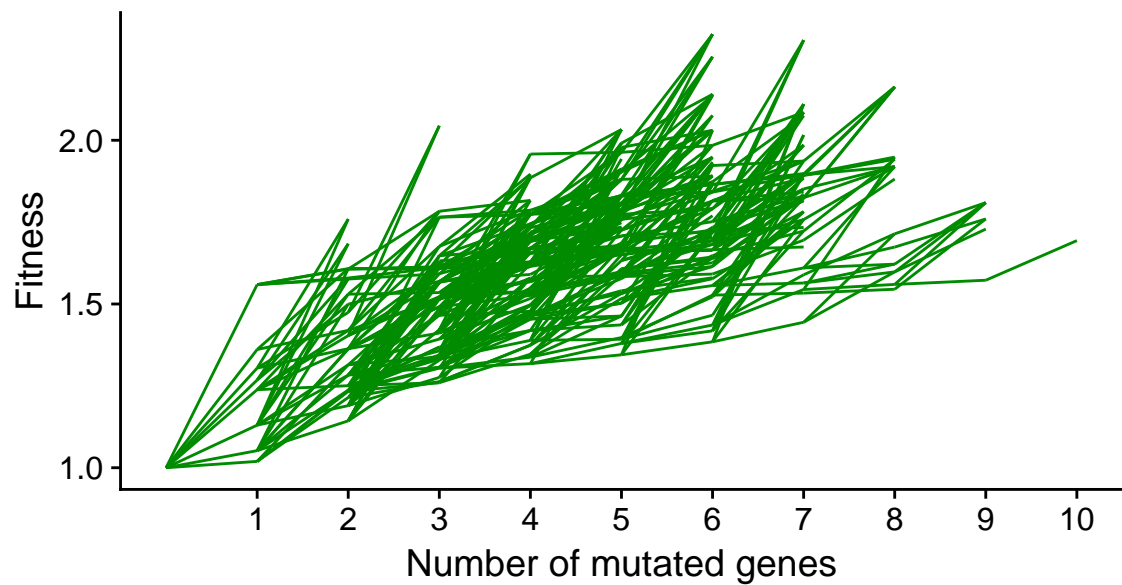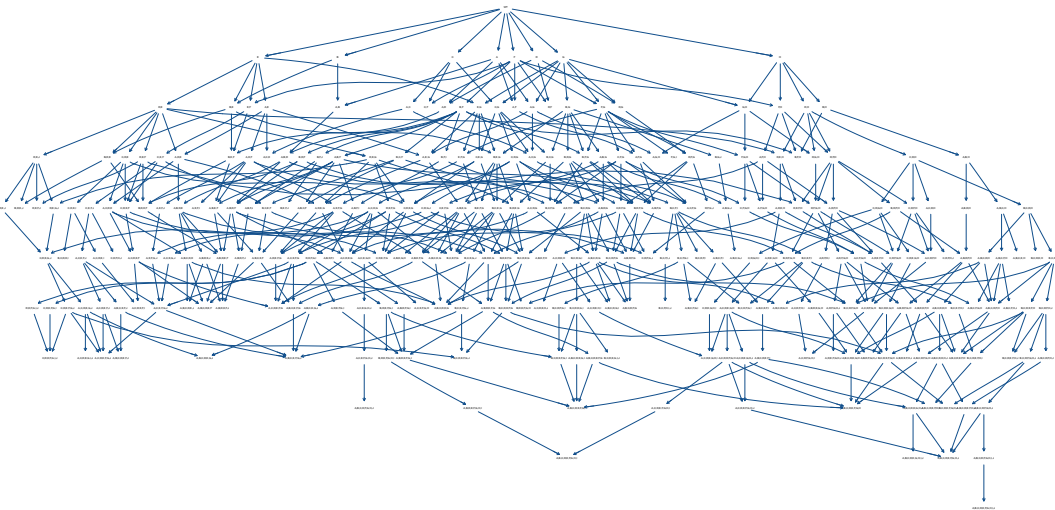

*ID* 341bQ6tMBQ3wbqIX  
*acc genotypes* 204  
*peaks no back* 68  
*removed edges* NA  
*prop rem edges* NA

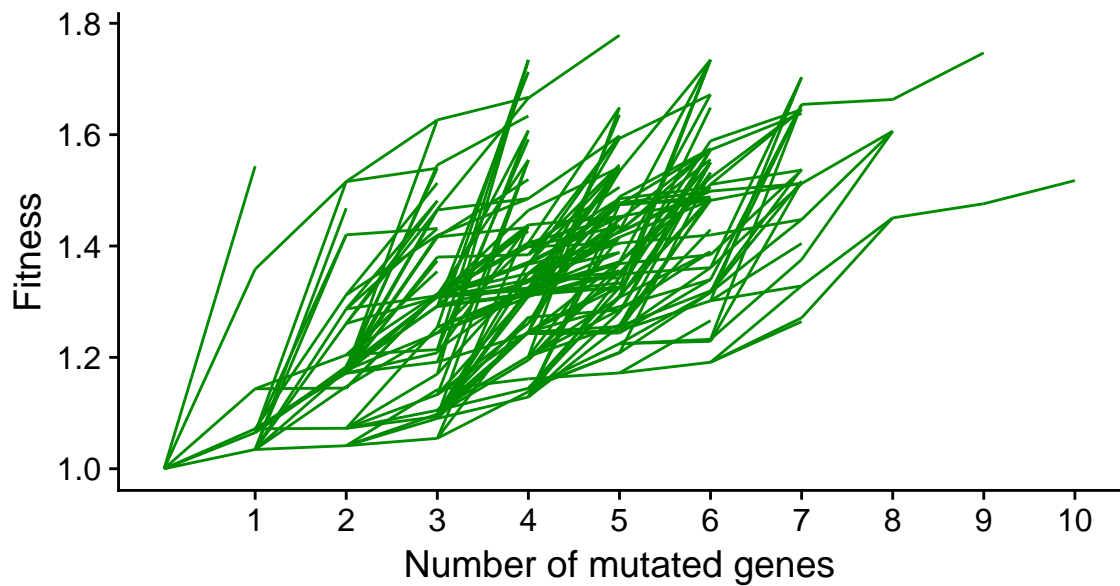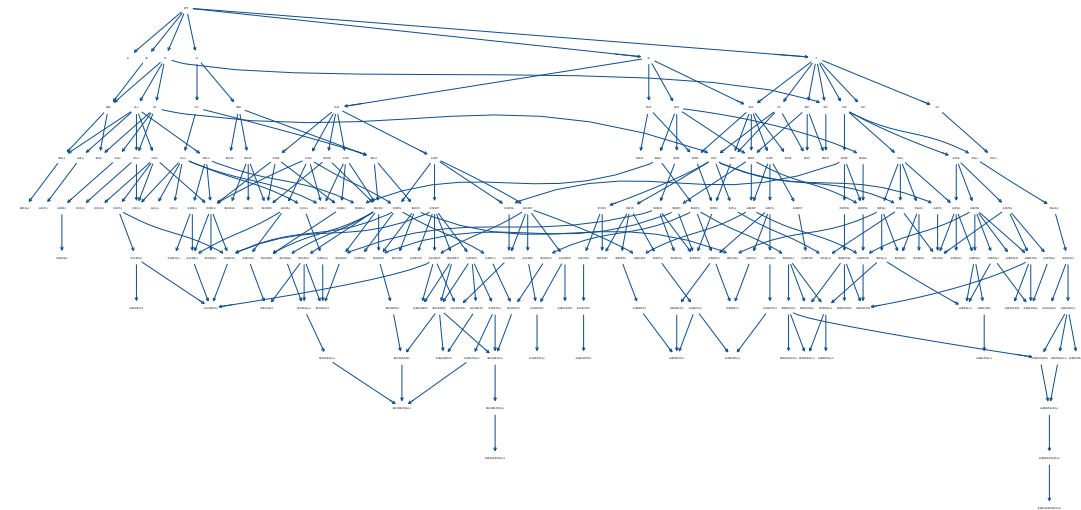



ID 3ageR5IDF1410rU5i  
 acc genotypes 51  
 peaks no back 25  
 removed edges NA  
 prop rem edges NA

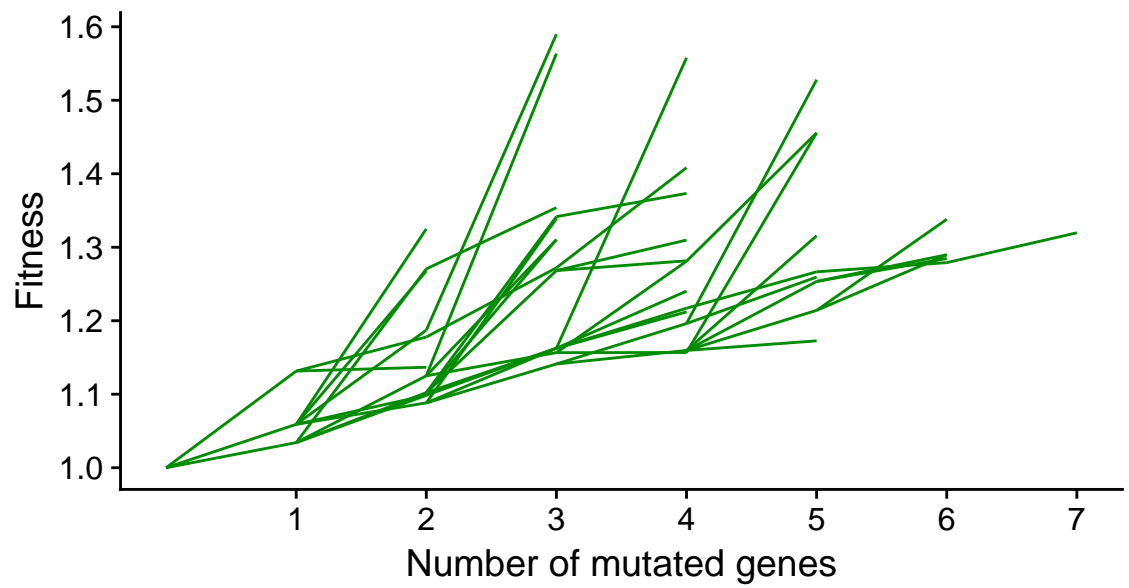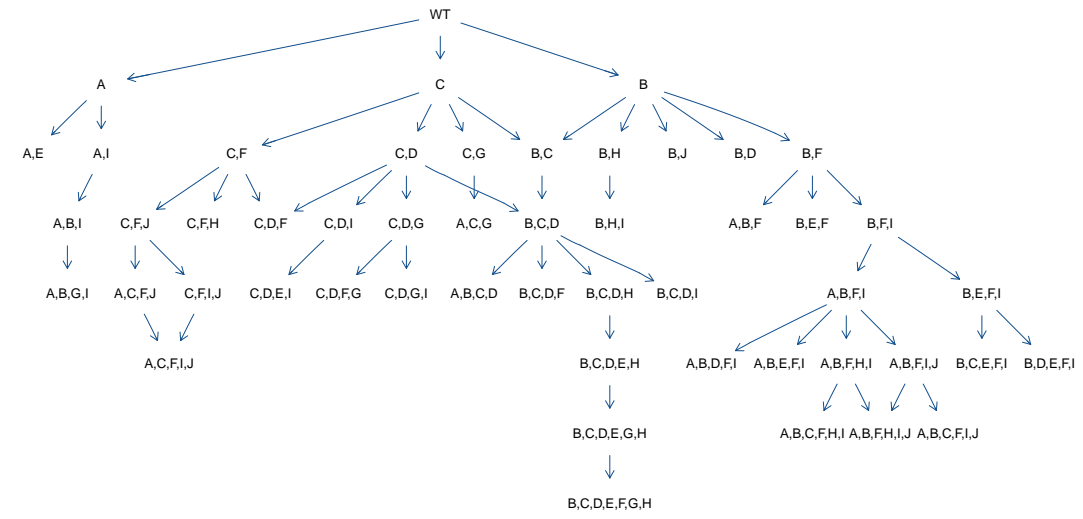

*ID* 3PJ410K7y10k7imair  
*acc genotypes* 921  
*peaks no back* 50  
*removed edges* NA  
*prop rem edges* NA

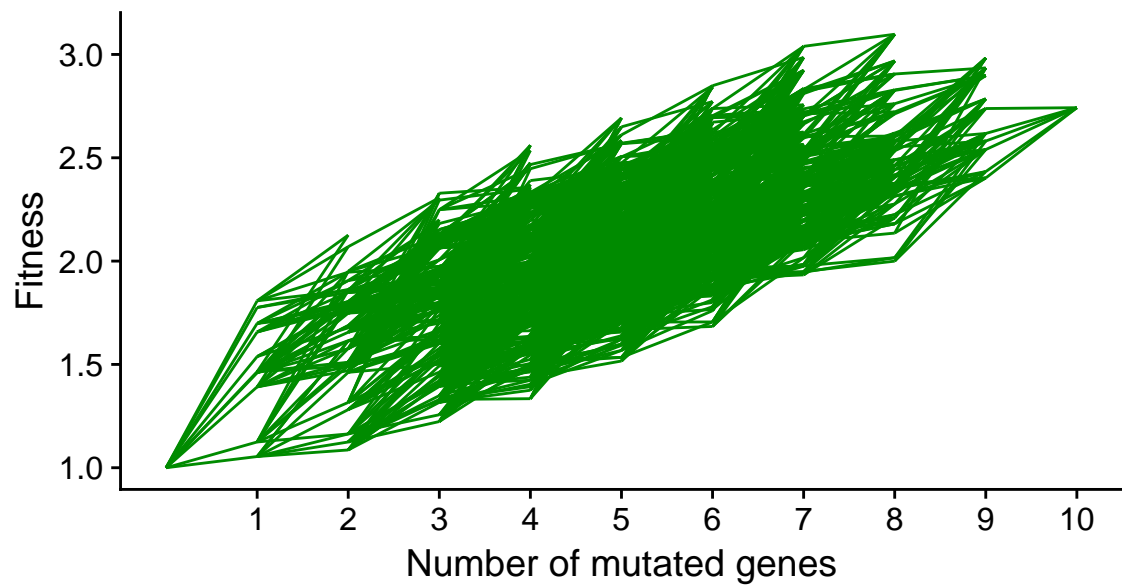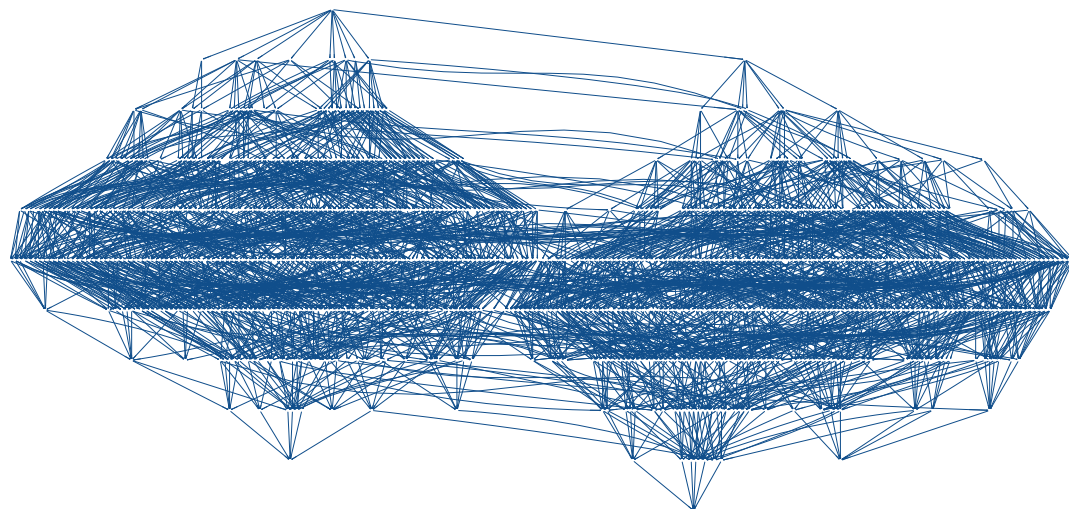

ID 3r101LFQ84LQ4QX2E  
 acc genotypes 66  
 peaks no back 29  
 removed edges NA  
 prop rem edges NA

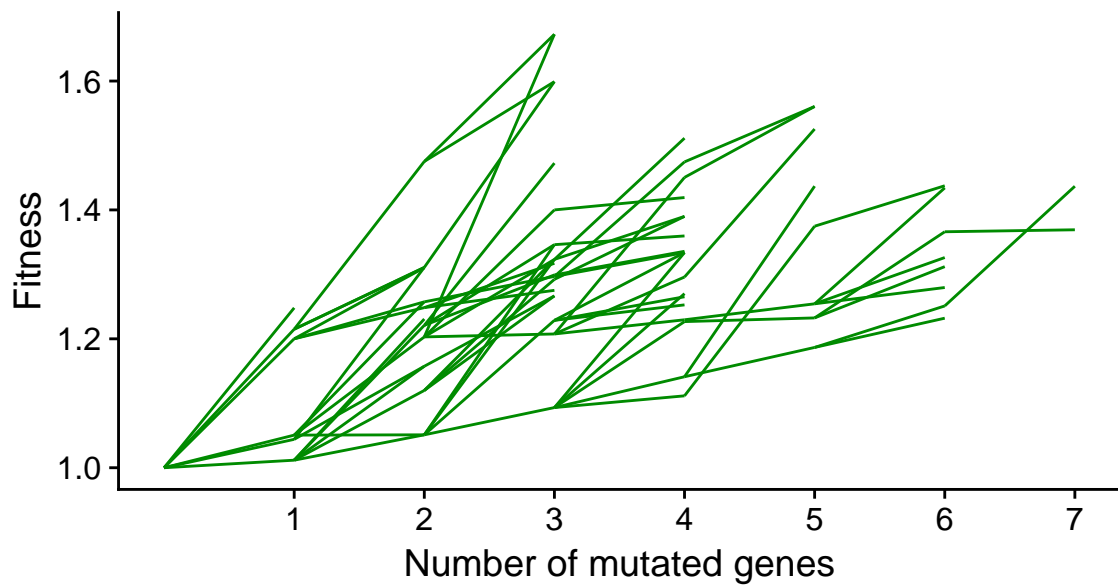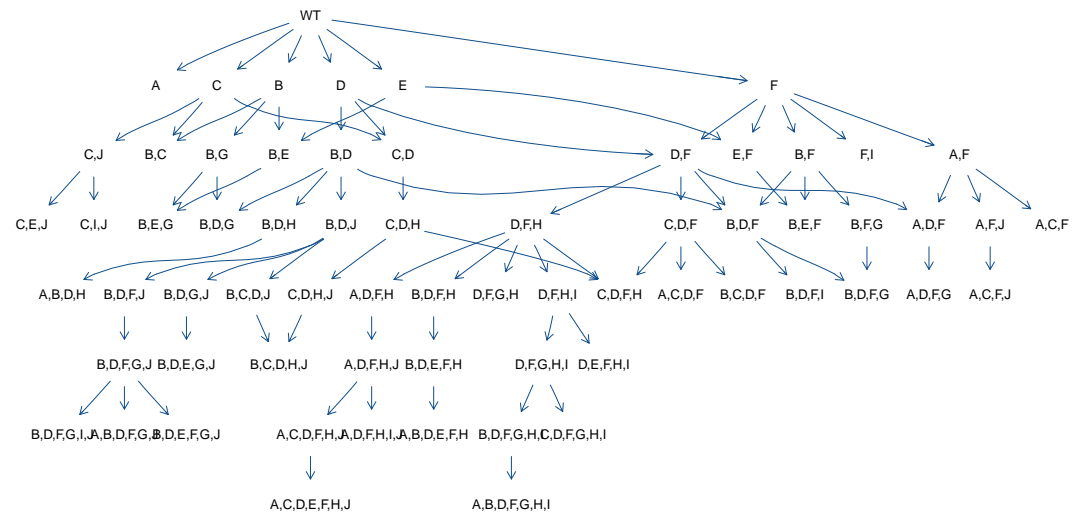

ID 3uTPGDsbMFbp45JR  
 acc genotypes 131  
 peaks no back 38  
 removed edges NA  
 prop rem edges NA

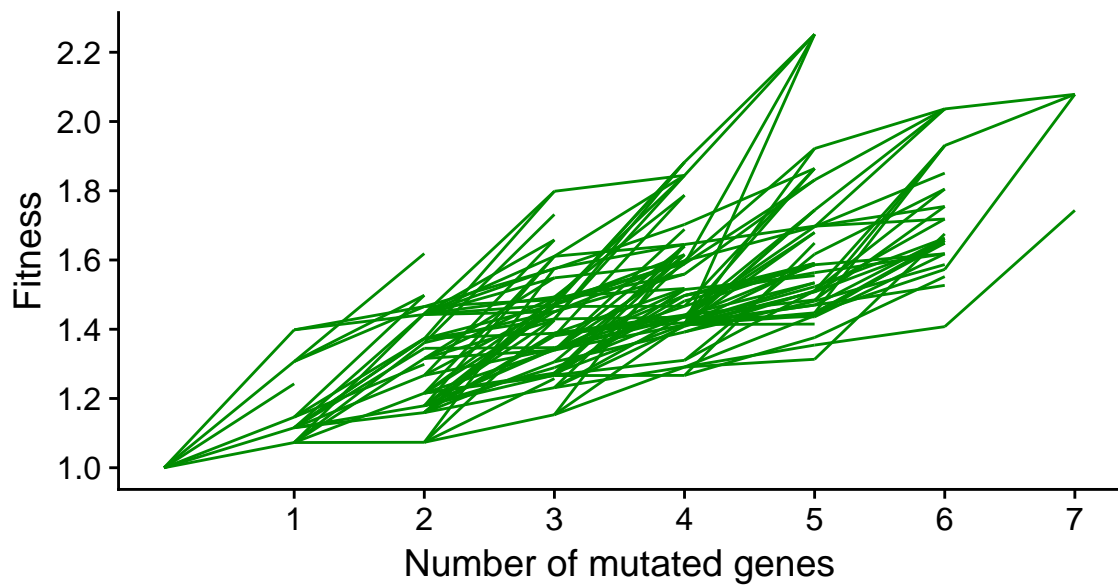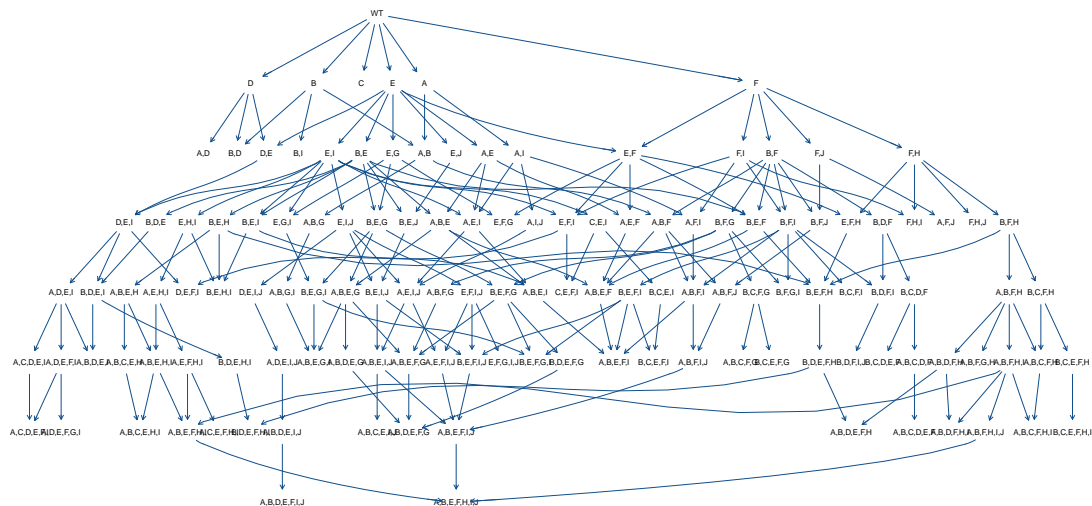

ID 3VdNxc10SG10x5vQBJ  
 acc genotypes 82  
 peaks no back 35  
 removed edges NA  
 prop rem edges NA

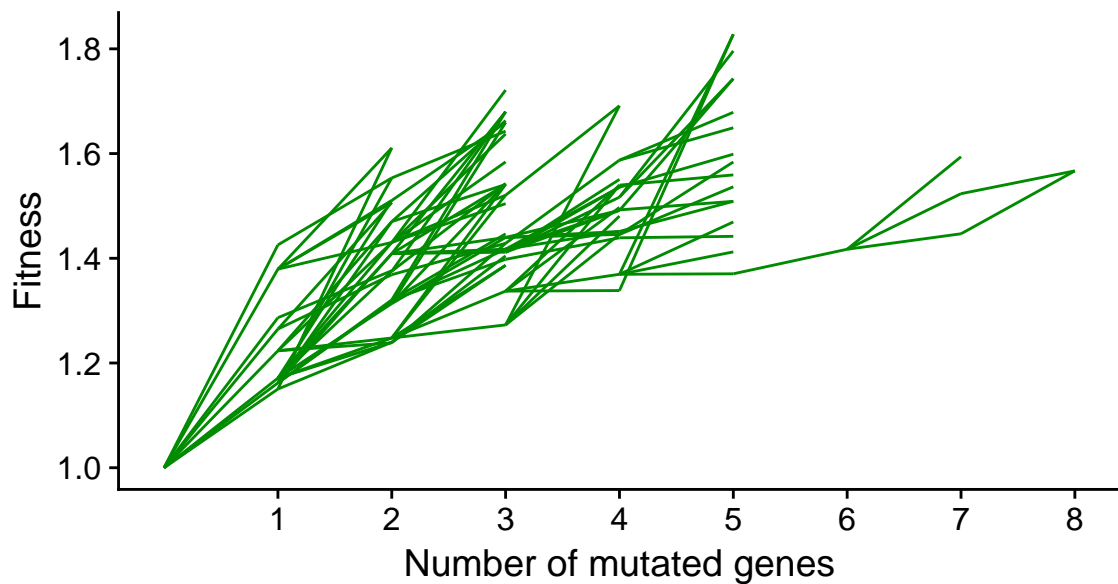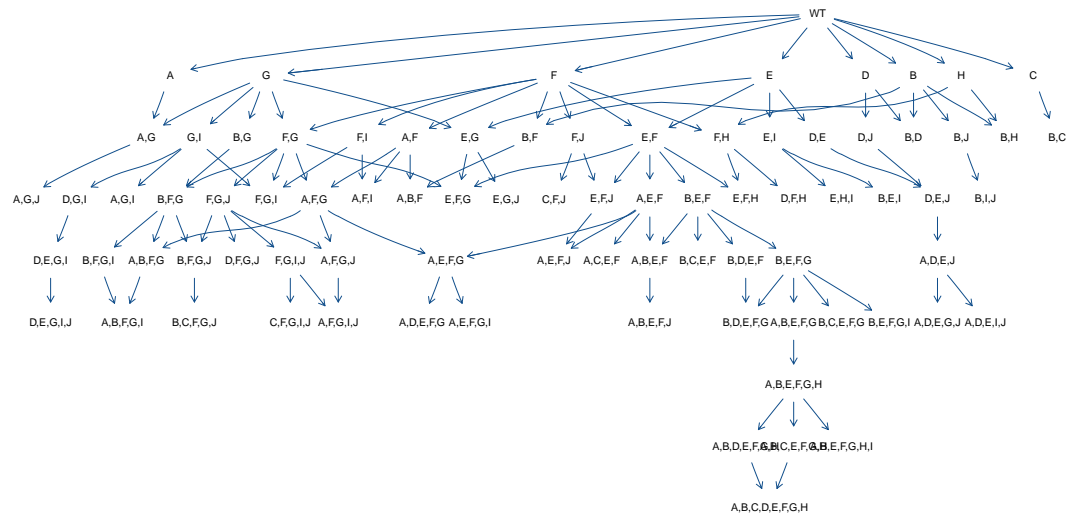

ID 4Ckly1UeVlKv4sax  
 acc genotypes 191  
 peaks no back 38  
 removed edges NA  
 prop rem edges NA

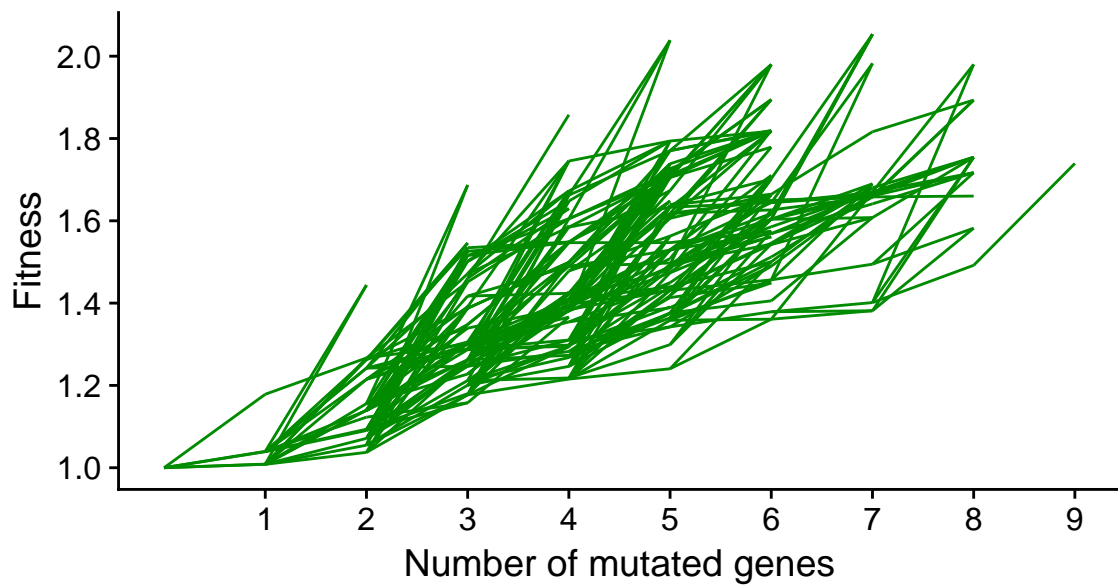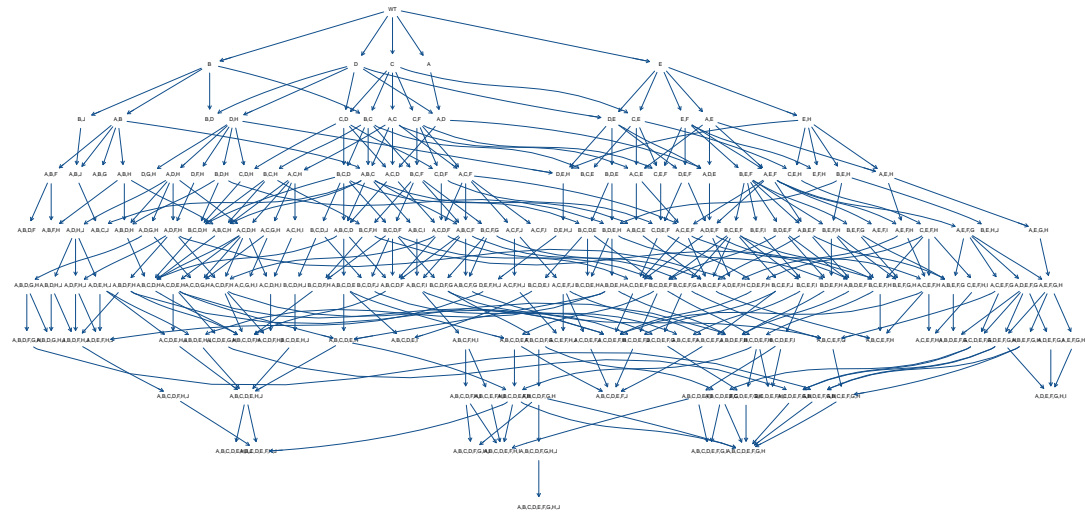

ID 4RVESRiVwzxmDTB9  
 acc genotypes 82  
 peaks no back 23  
 removed edges NA  
 prop rem edges NA

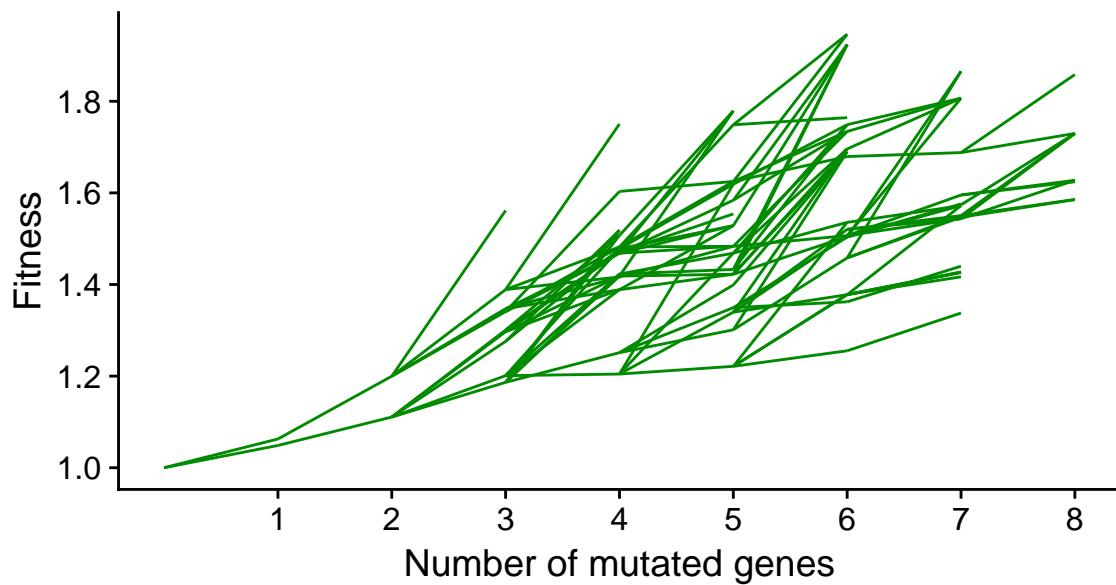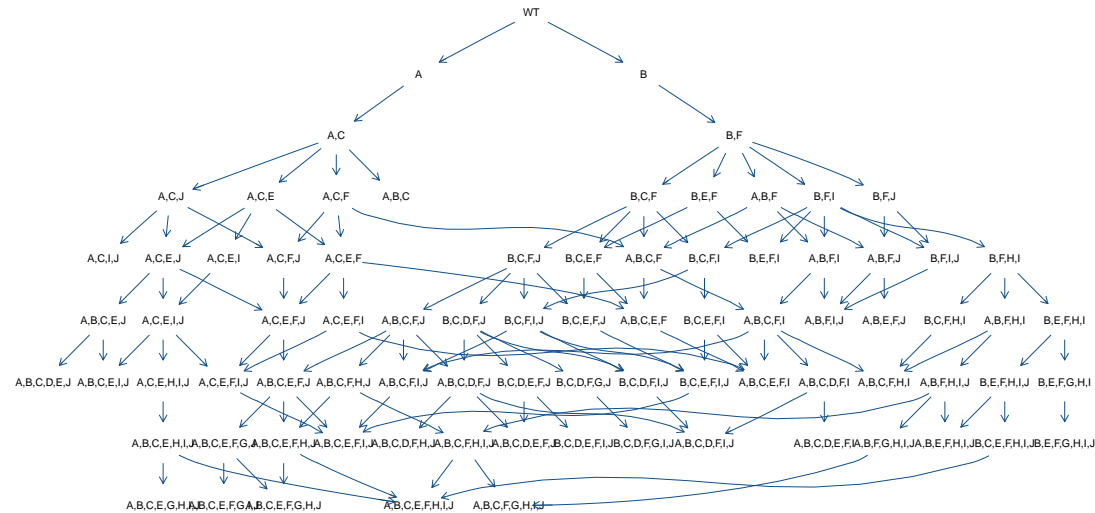

ID 5h10KTbvYD9O10OXnK  
 acc genotypes 59  
 peaks no back 28  
 removed edges NA  
 prop rem edges NA

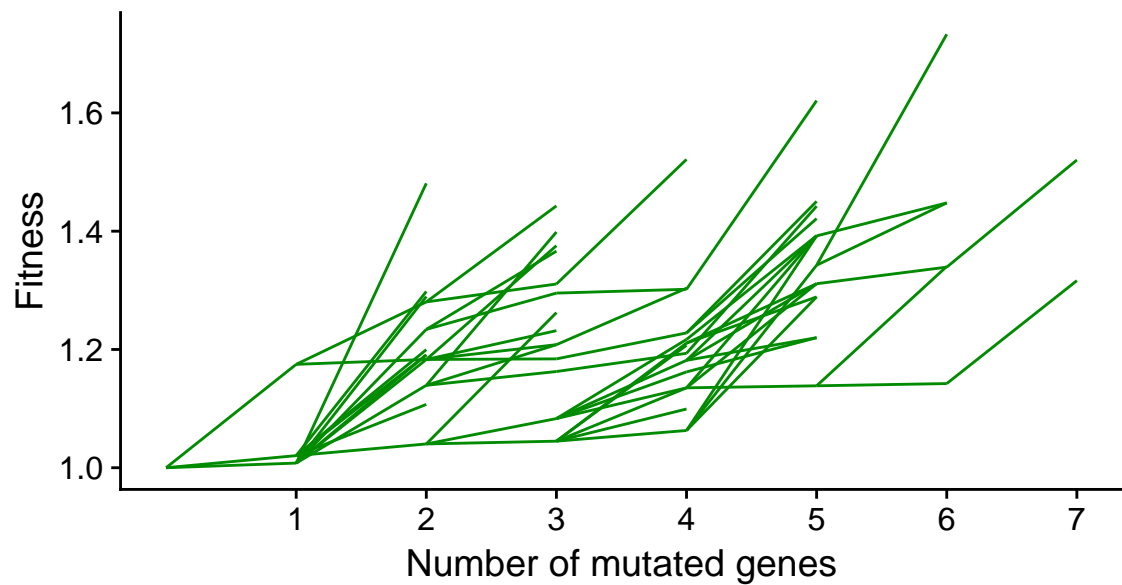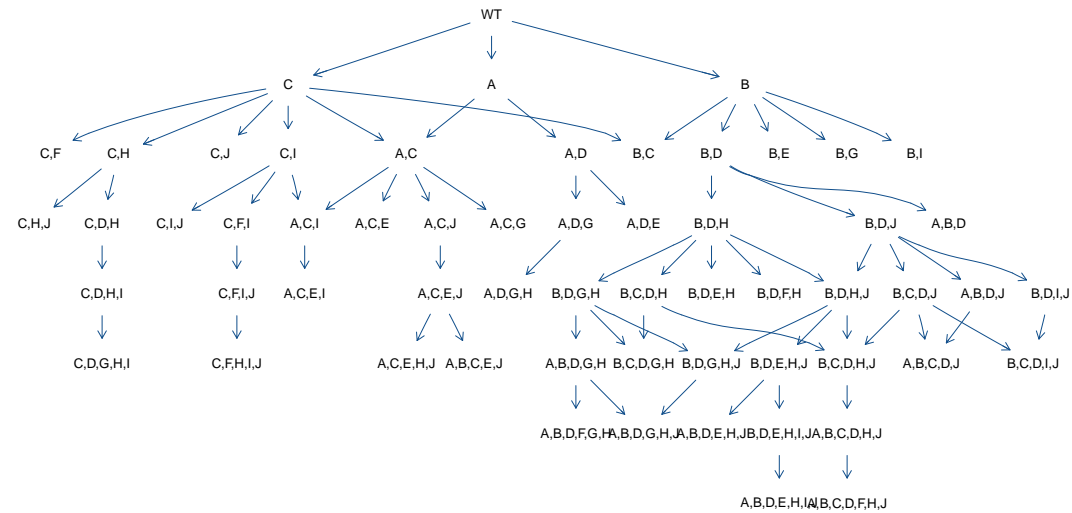



*ID* 5w3nMqdUbSKjUyuj  
*acc genotypes* 336  
*peaks no back* 69  
*removed edges* NA  
*prop rem edges* NA

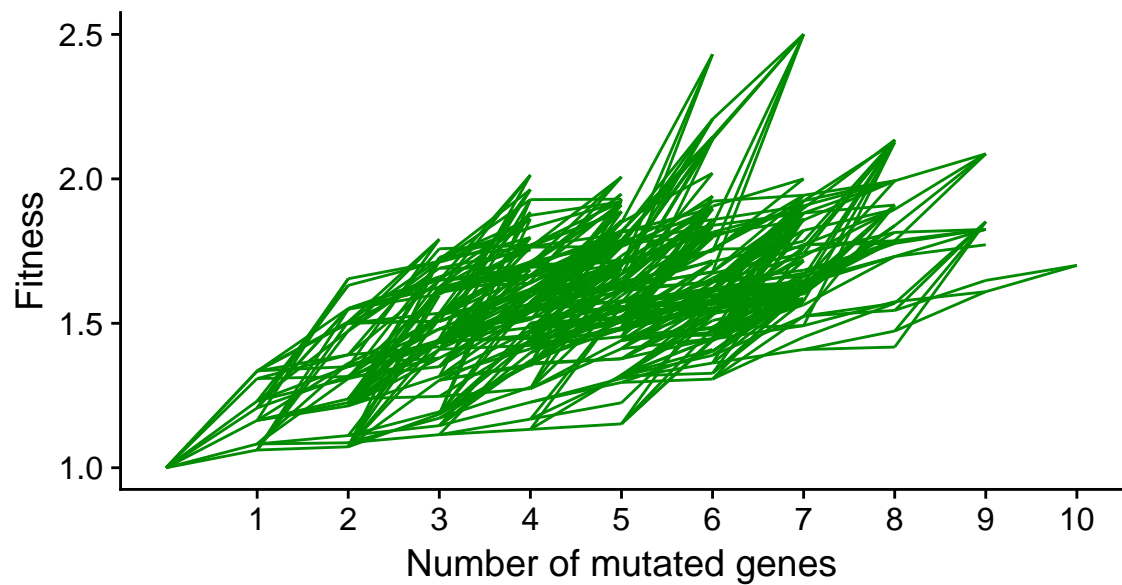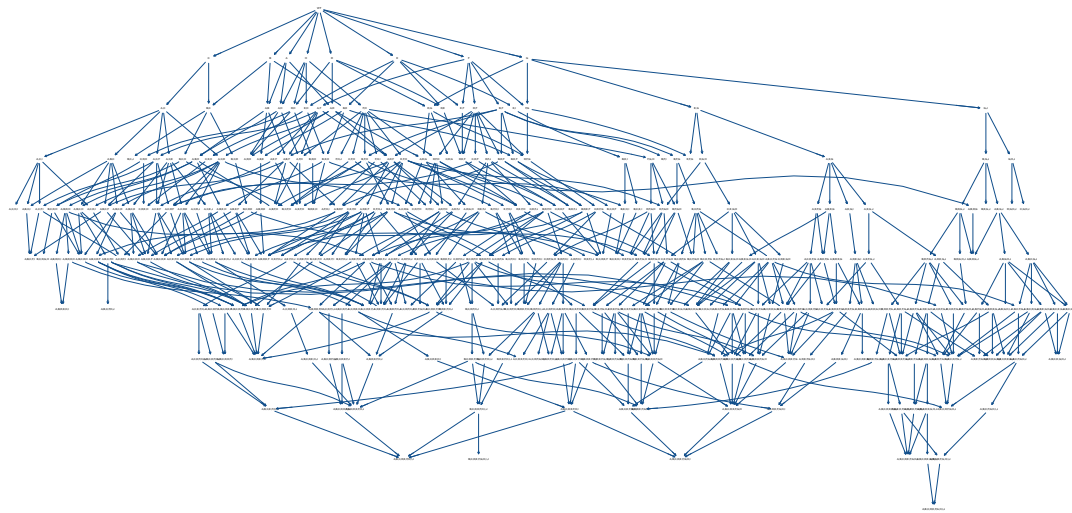

*ID* 5XTuzOyhioi24t2s  
*acc genotypes* 48  
*peaks no back* 21  
*removed edges* NA  
*prop rem edges* NA

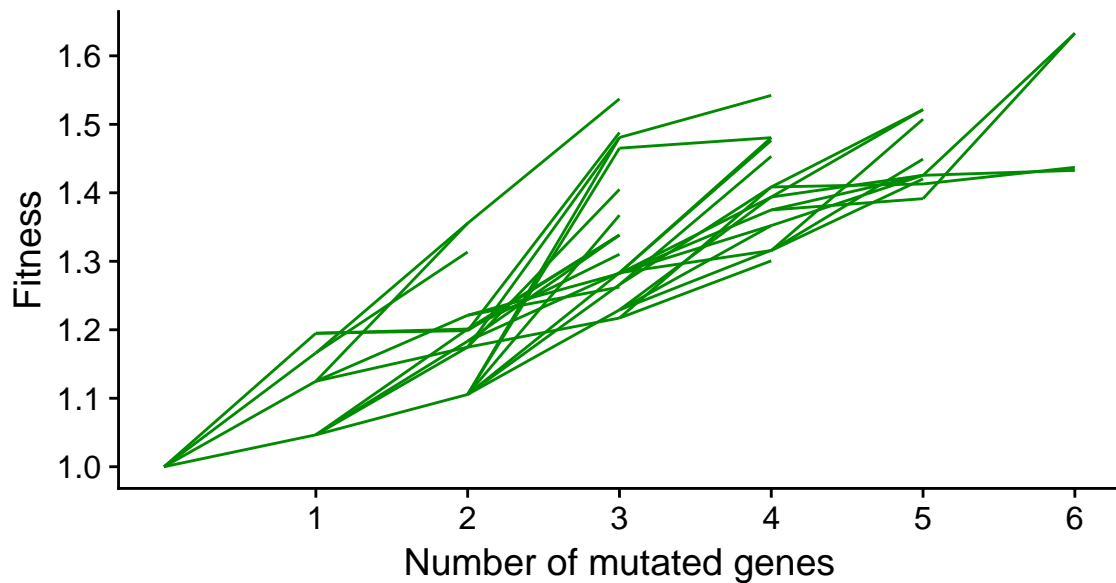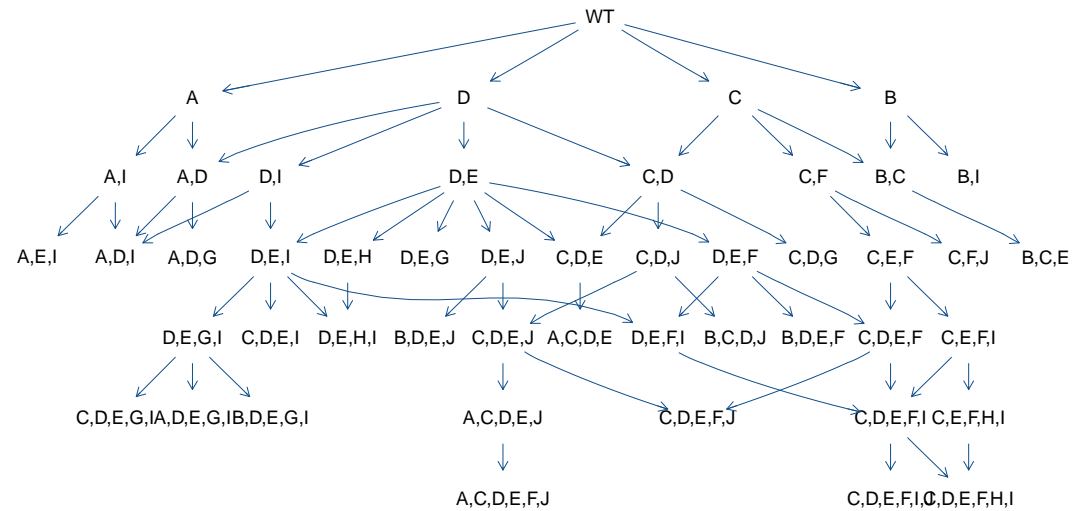

ID 75tsJre1YoxpOsyh  
 acc genotypes 187  
 peaks no back 70  
 removed edges NA  
 prop rem edges NA

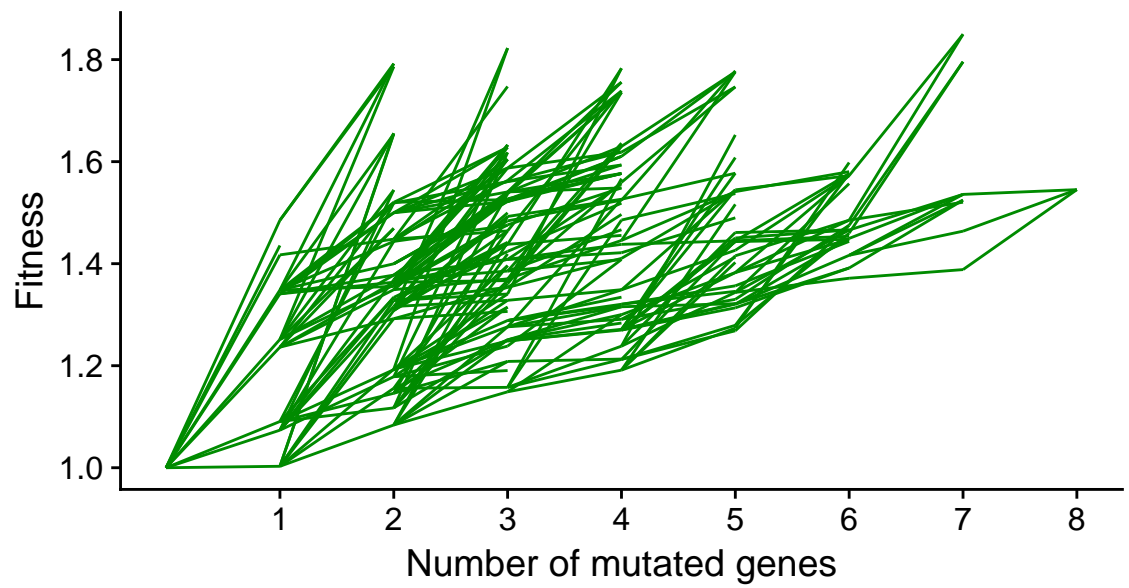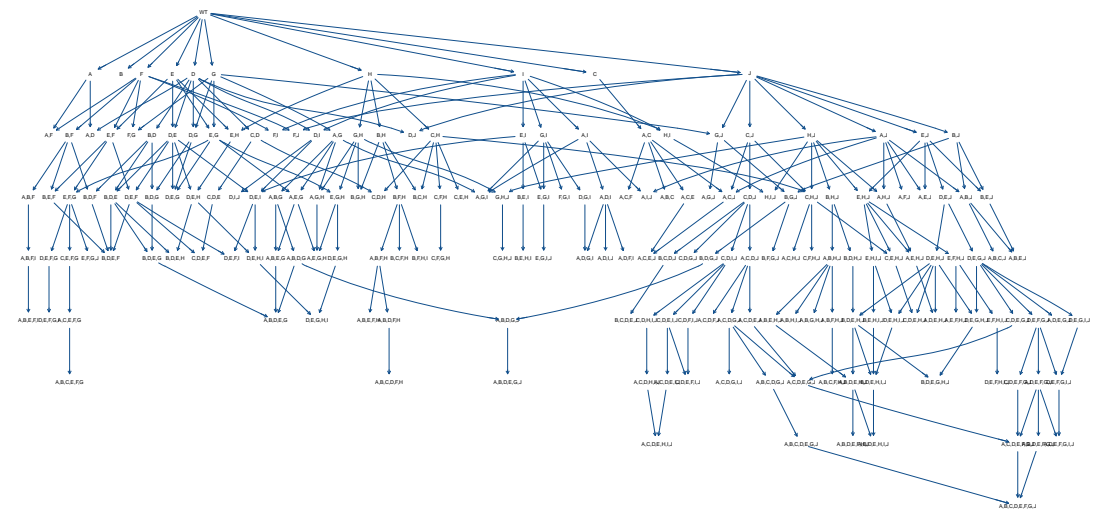

*ID* 7DaZyu10znssTnBfx  
*acc genotypes* 674  
*peaks no back* 56  
*removed edges* NA  
*prop rem edges* NA

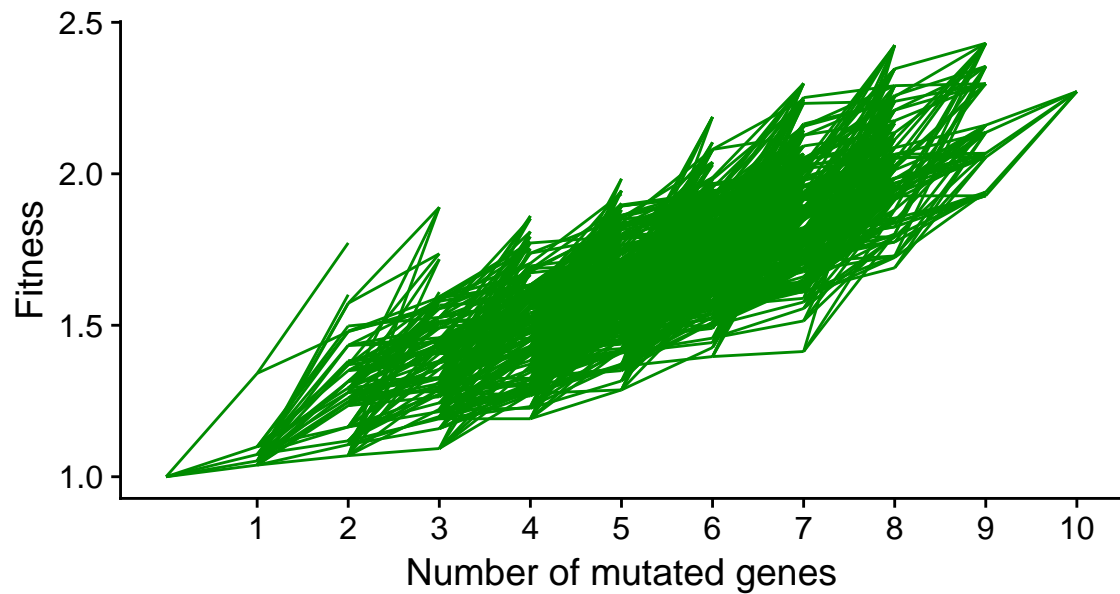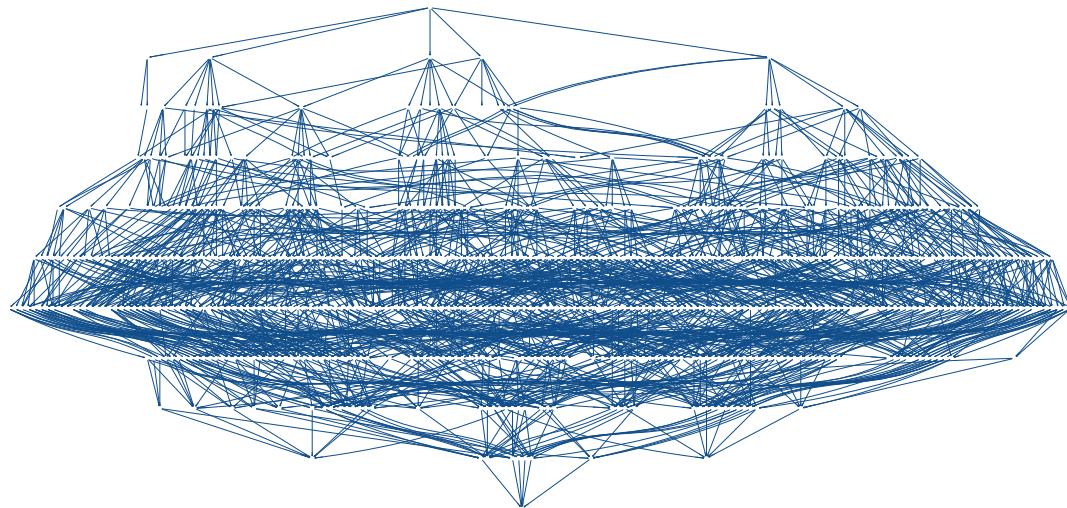

*ID* 7GapUNhPAnaZAI1M  
*acc genotypes* 427  
*peaks no back* 53  
*removed edges* NA  
*prop rem edges* NA

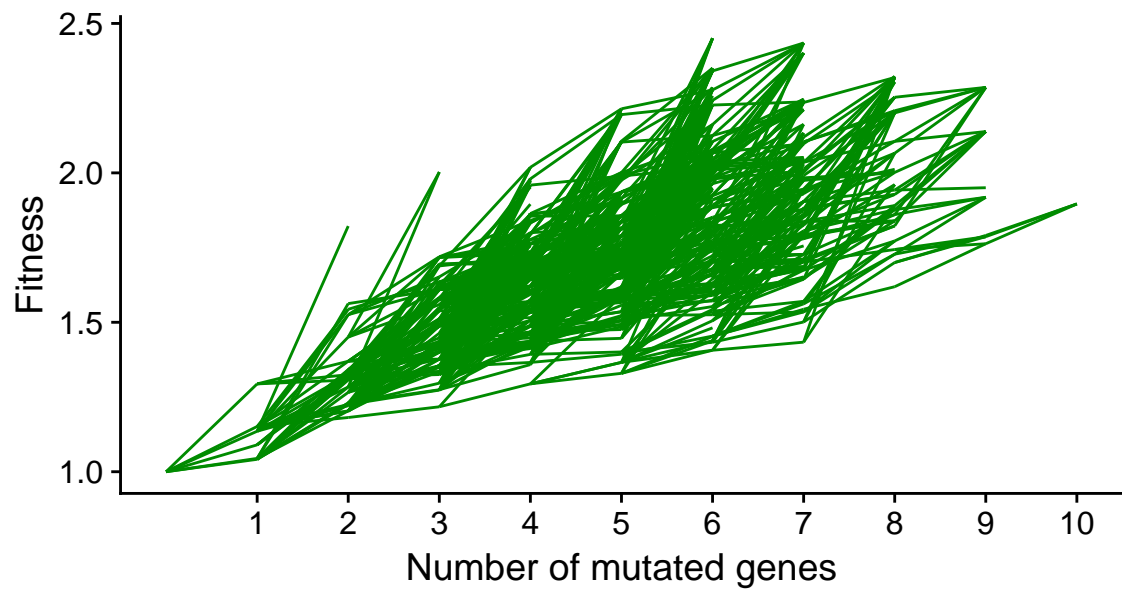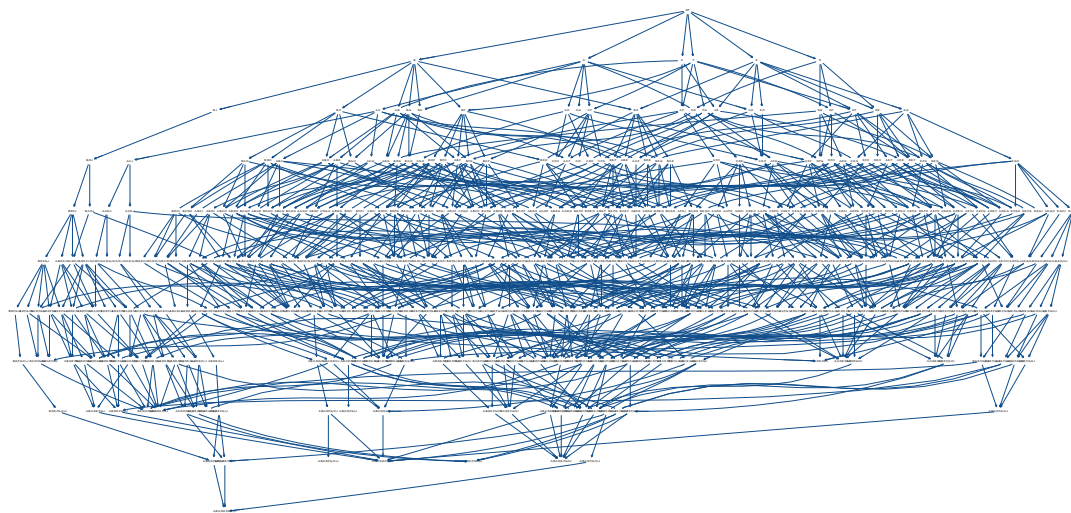

ID 7jxvBR1z6DAUzbL  
 acc genotypes 24  
 peaks no back 12  
 removed edges NA  
 prop rem edges NA

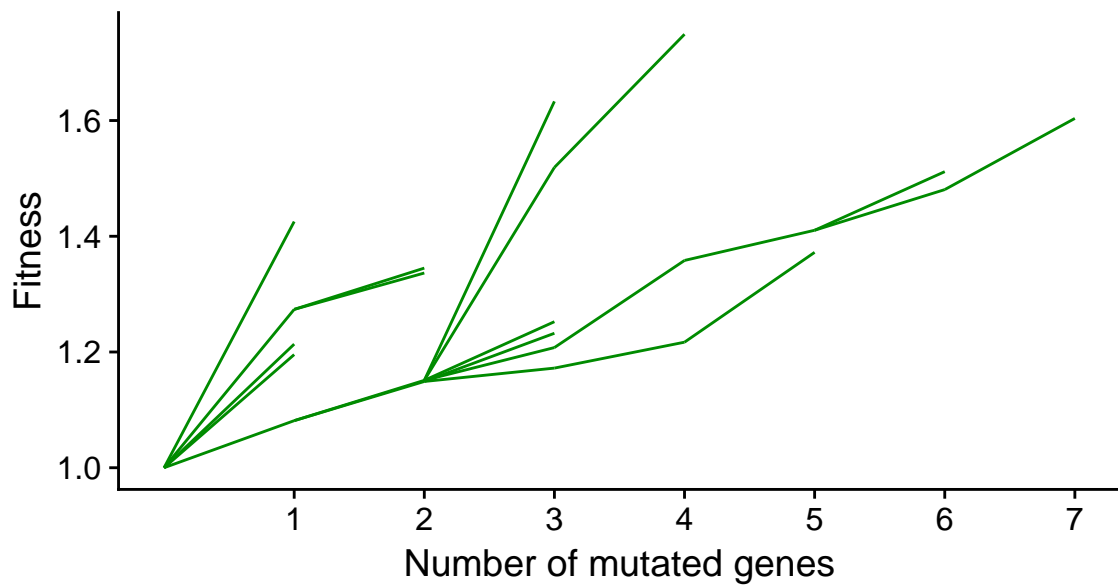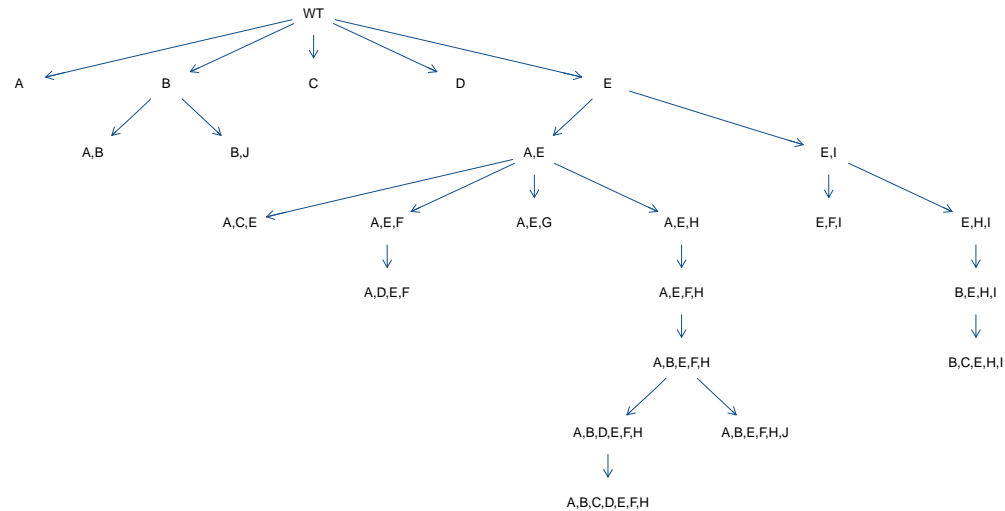

*ID* 7KQQodSTMHz6tzpM  
*acc genotypes* 291  
*peaks no back* 55  
*removed edges* NA  
*prop rem edges* NA

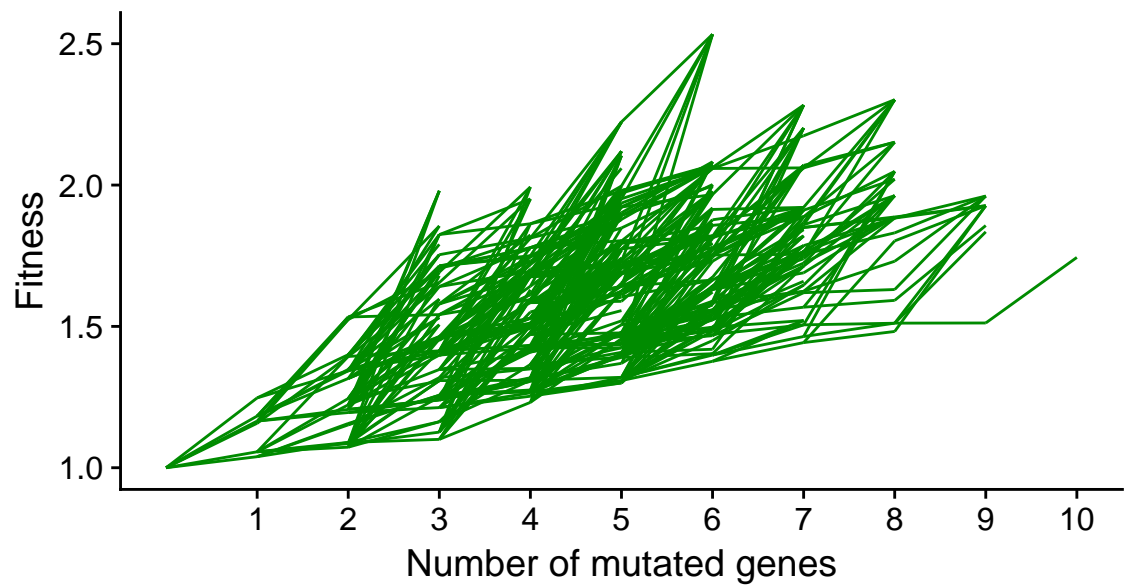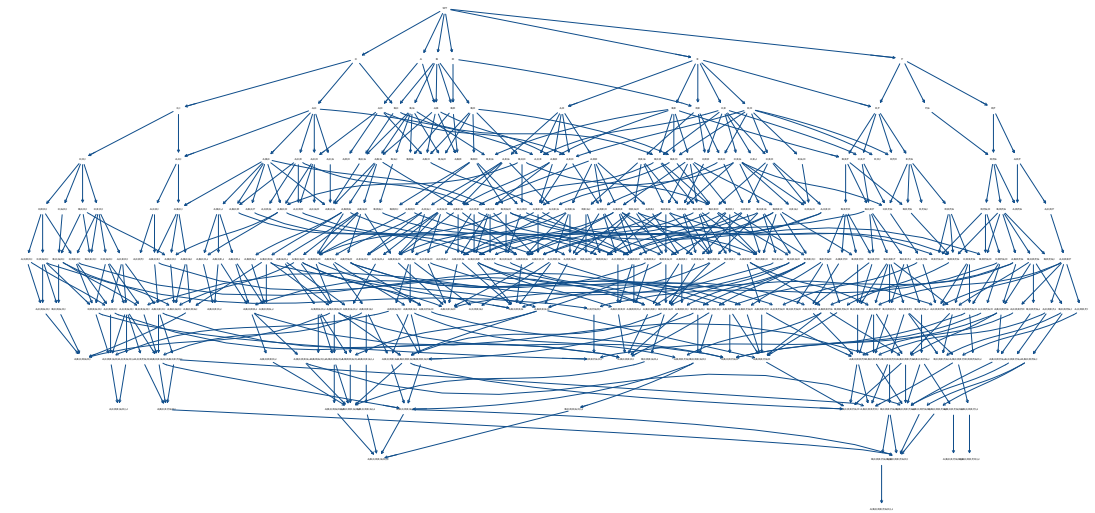

ID 7yMvs88xHRDYKybO  
 acc genotypes 182  
 peaks no back 62  
 removed edges NA  
 prop rem edges NA

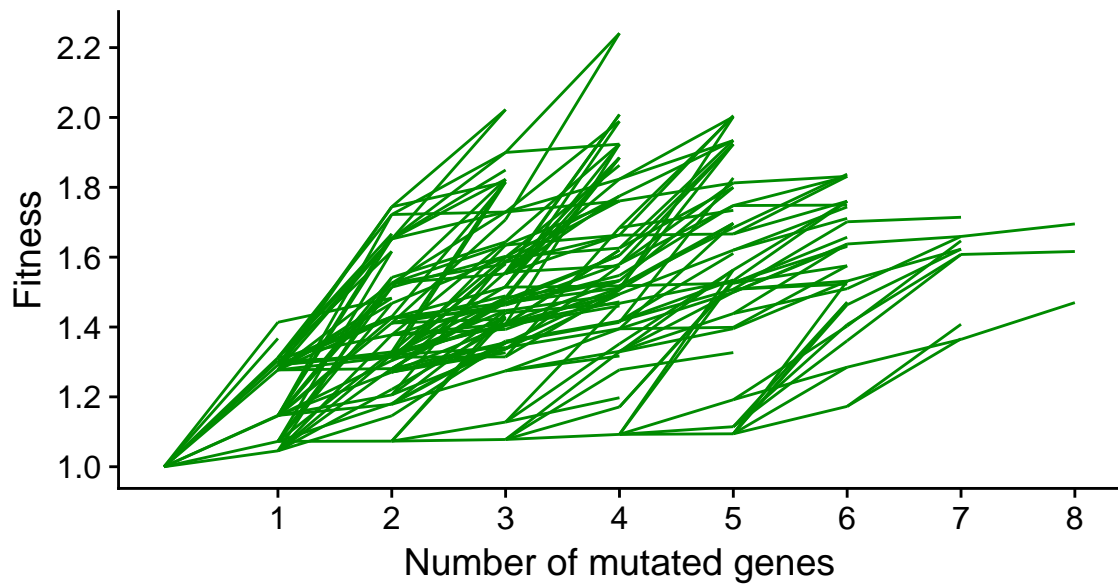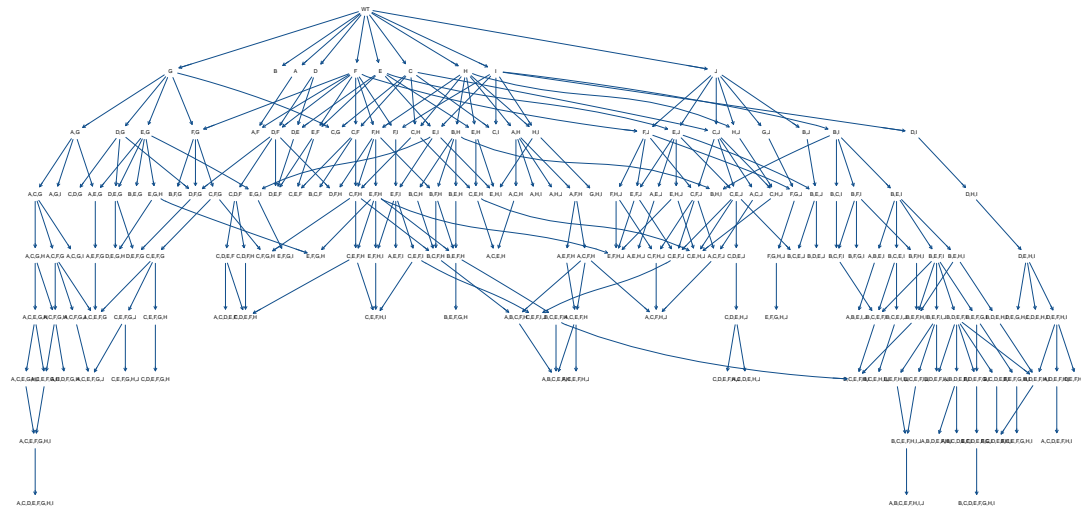



ID 7YYdBu6jr3vr7yKp  
 acc genotypes 197  
 peaks no back 75  
 removed edges NA  
 prop rem edges NA

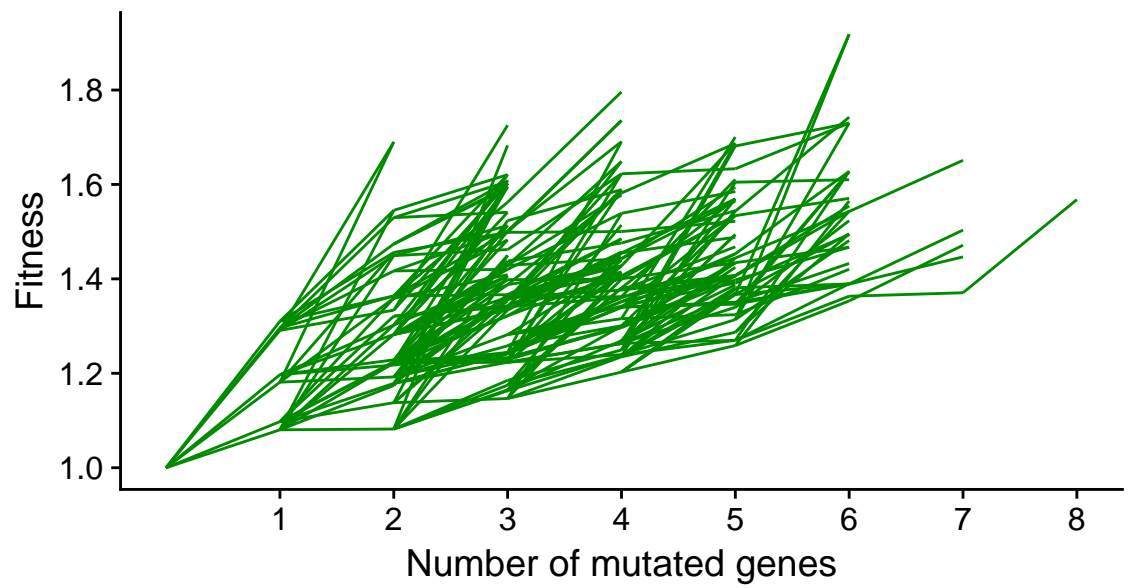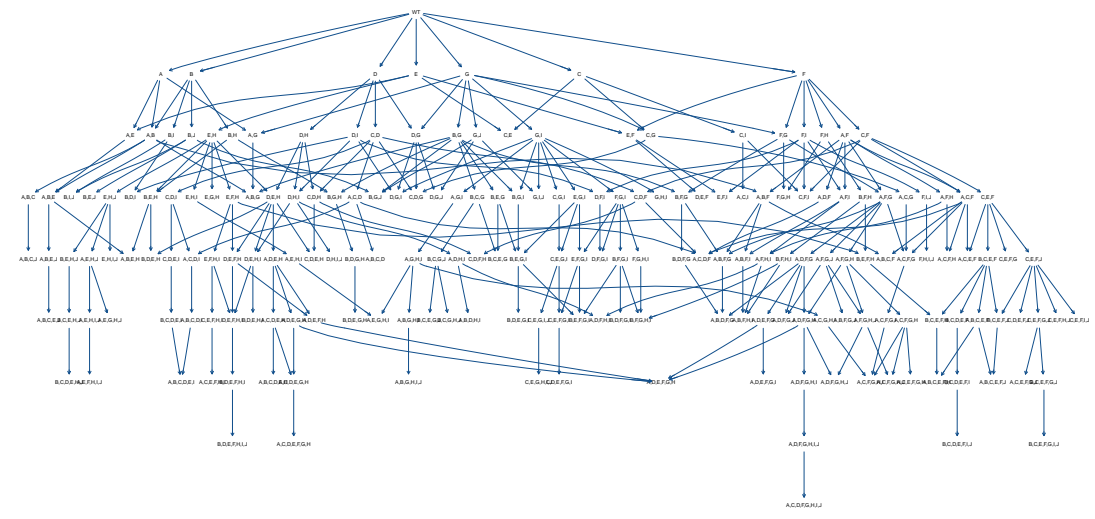

ID 80iLR0dLmPboaFyZ  
 acc genotypes 145  
 peaks no back 62  
 removed edges NA  
 prop rem edges NA

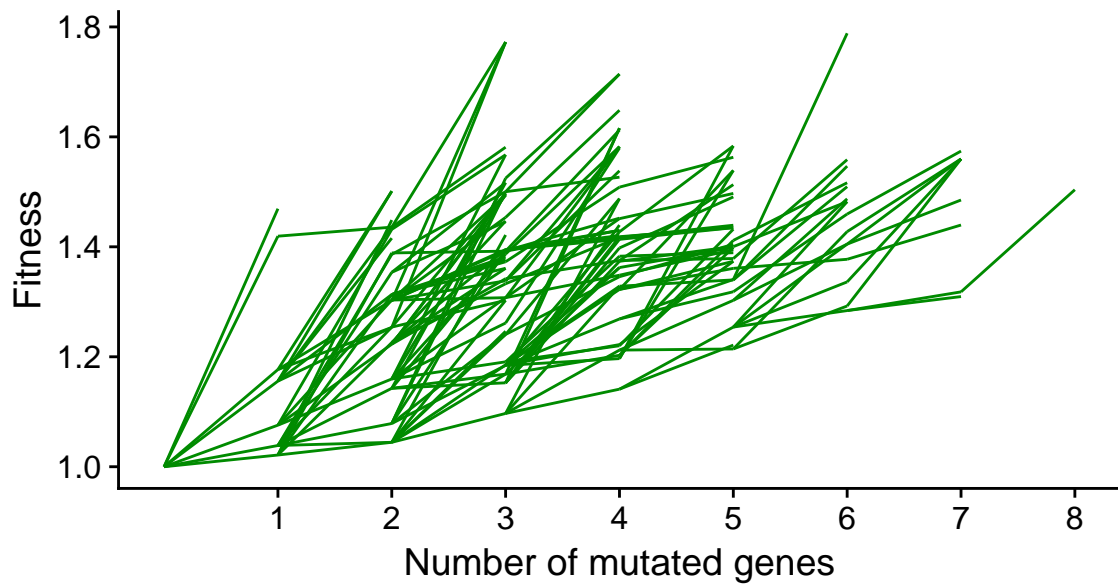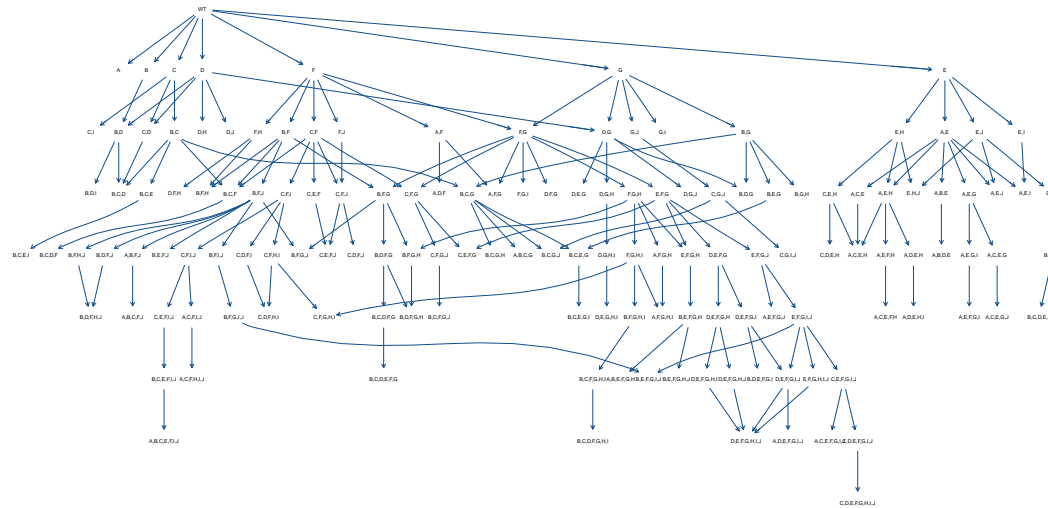

ID 8RlqFjyqv5Fe2F7q  
 acc genotypes 130  
 peaks no back 41  
 removed edges NA  
 prop rem edges NA

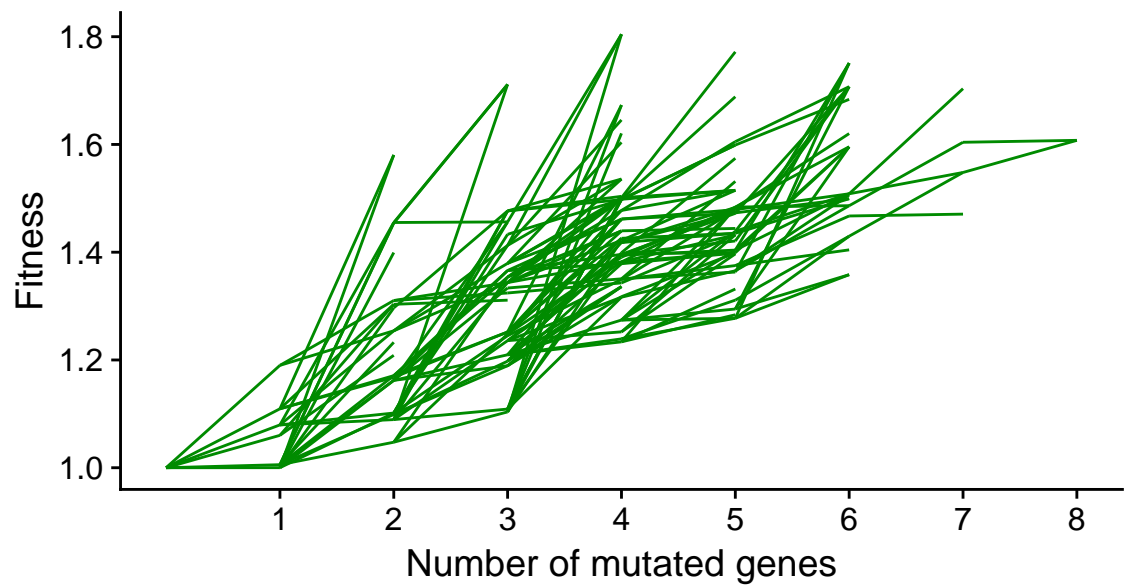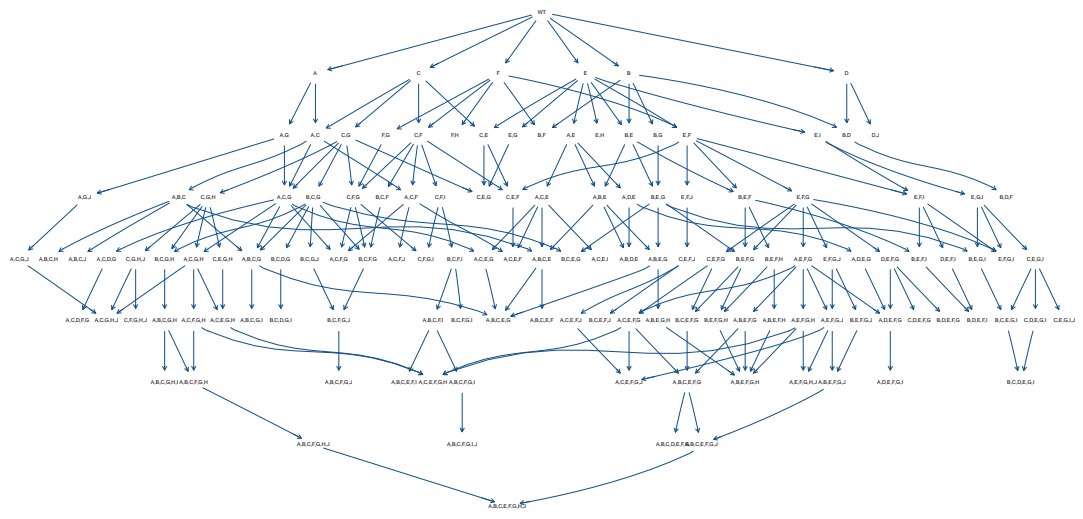

ID 8Wuwdsphcy5tFFeb  
 acc genotypes 117  
 peaks no back 46  
 removed edges NA  
 prop rem edges NA

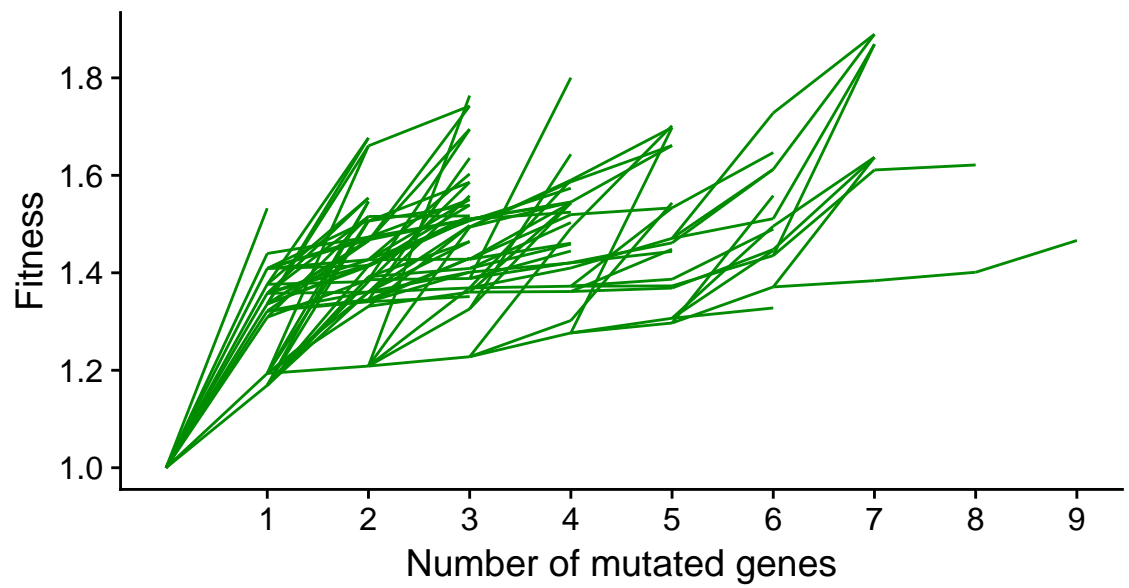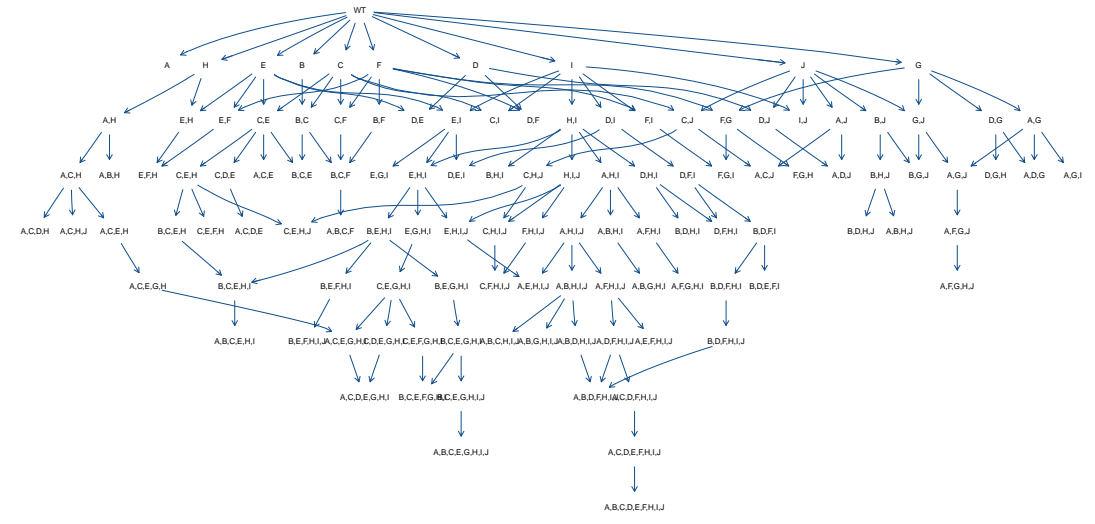

ID 913oZplmQJI3z3r  
 acc genotypes 96  
 peaks no back 39  
 removed edges NA  
 prop rem edges NA

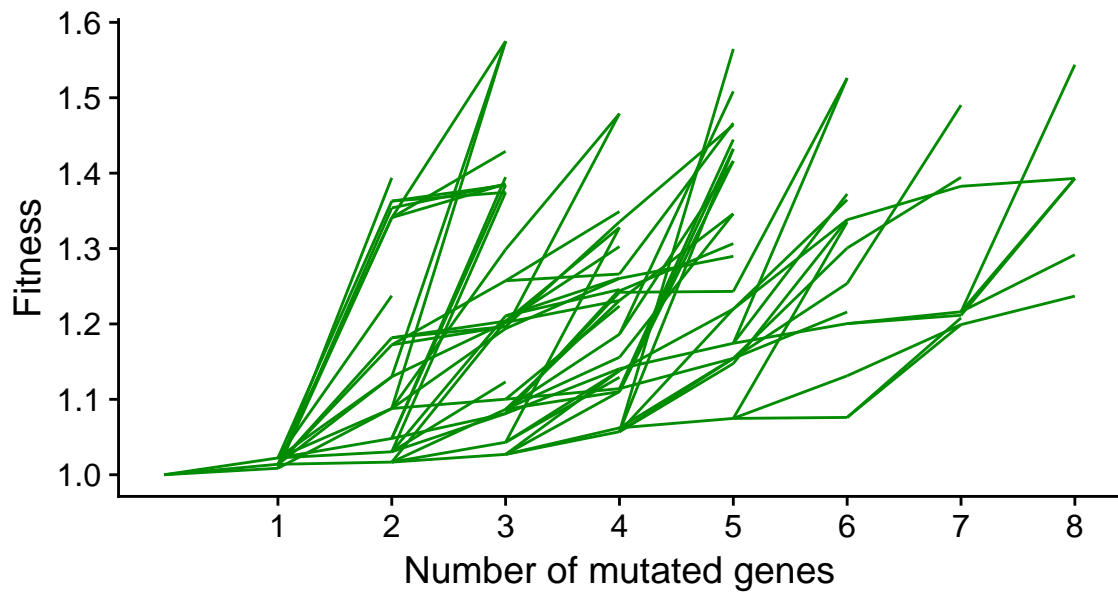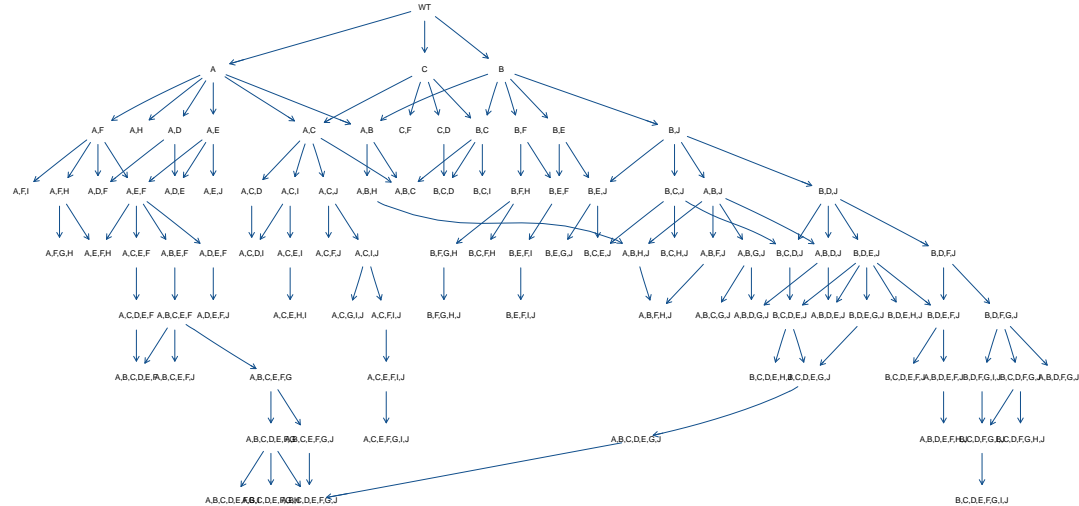

ID 9cep5DgsrTOPpWos  
 acc genotypes 163  
 peaks no back 43  
 removed edges NA  
 prop rem edges NA

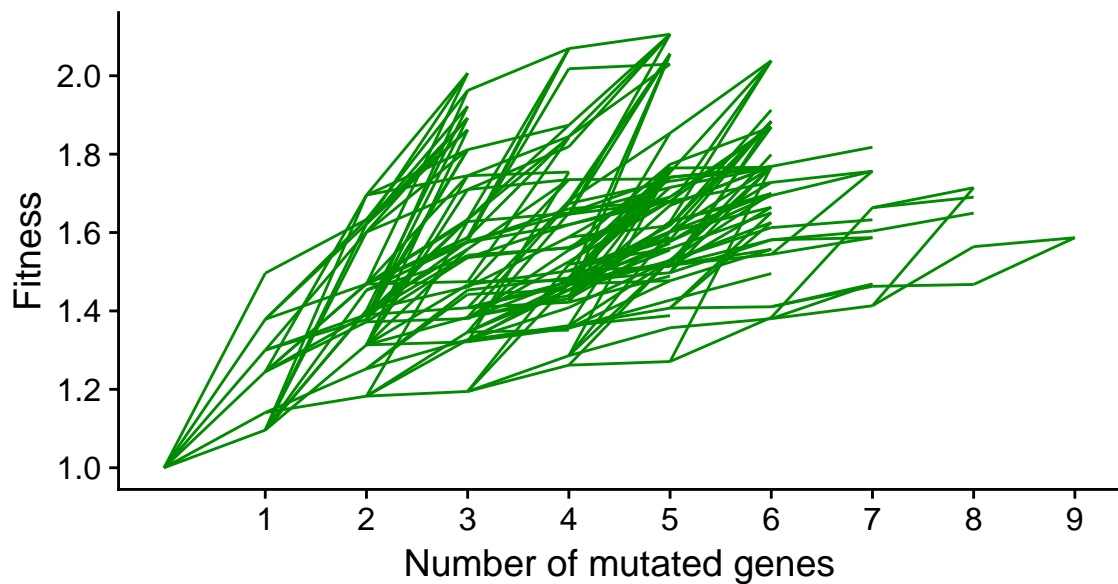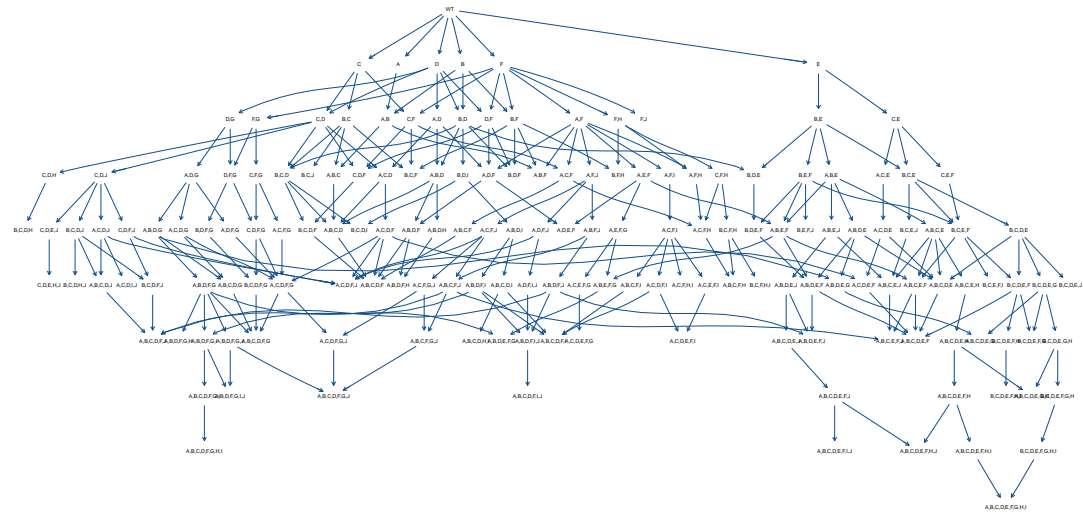

*ID* 9FoiB310FGDvgWcIE  
*acc genotypes* 231  
*peaks no back* 69  
*removed edges* NA  
*prop rem edges* NA

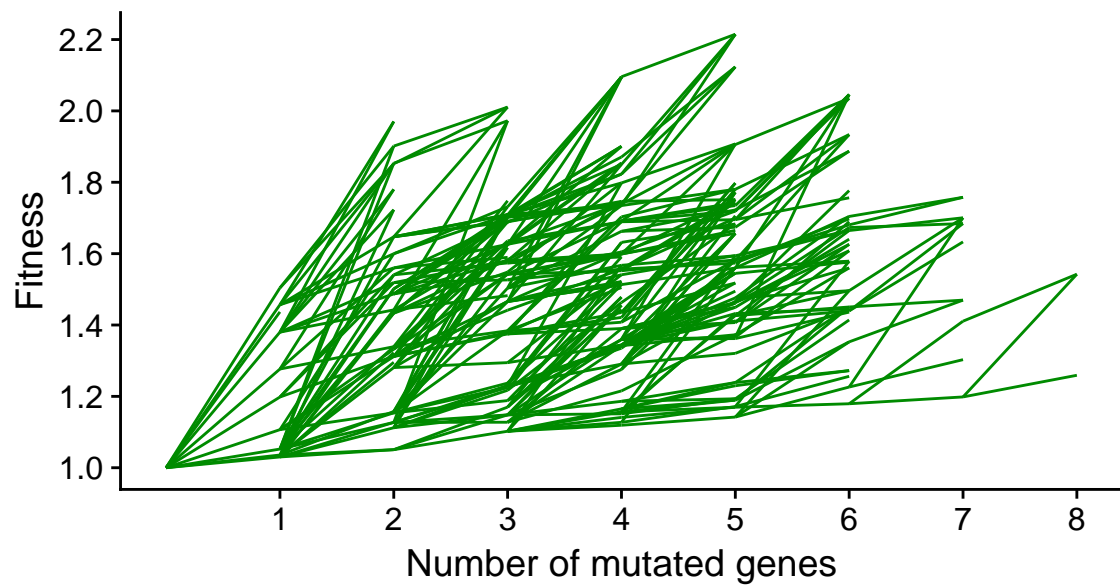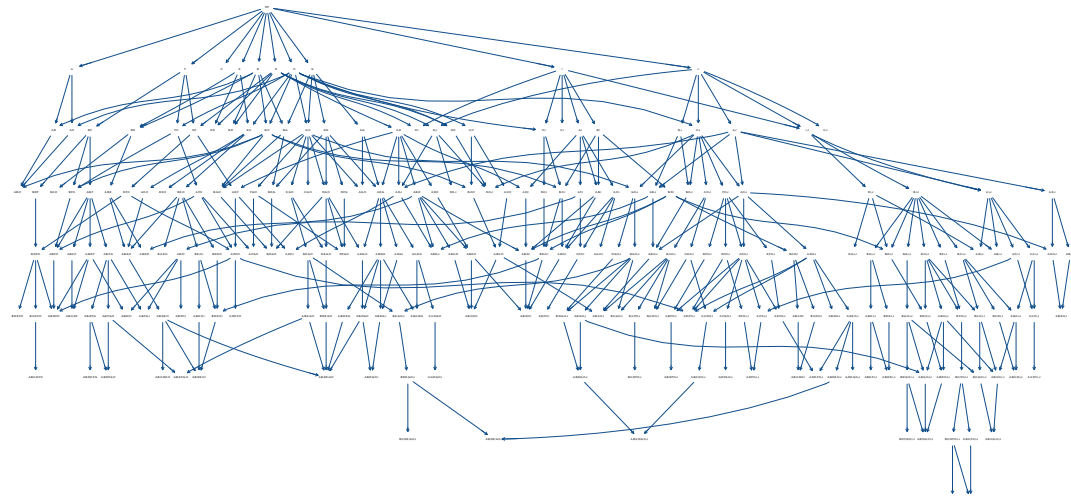

*ID* A1JsKu9z21G7TWcc  
*acc genotypes* 261  
*peaks no back* 105  
*removed edges* NA  
*prop rem edges* NA

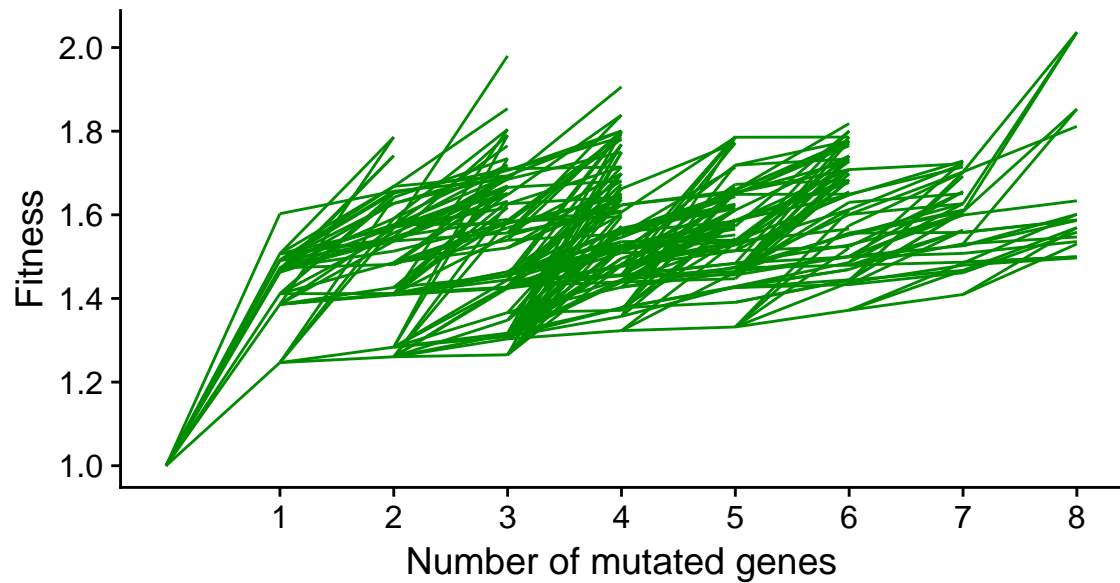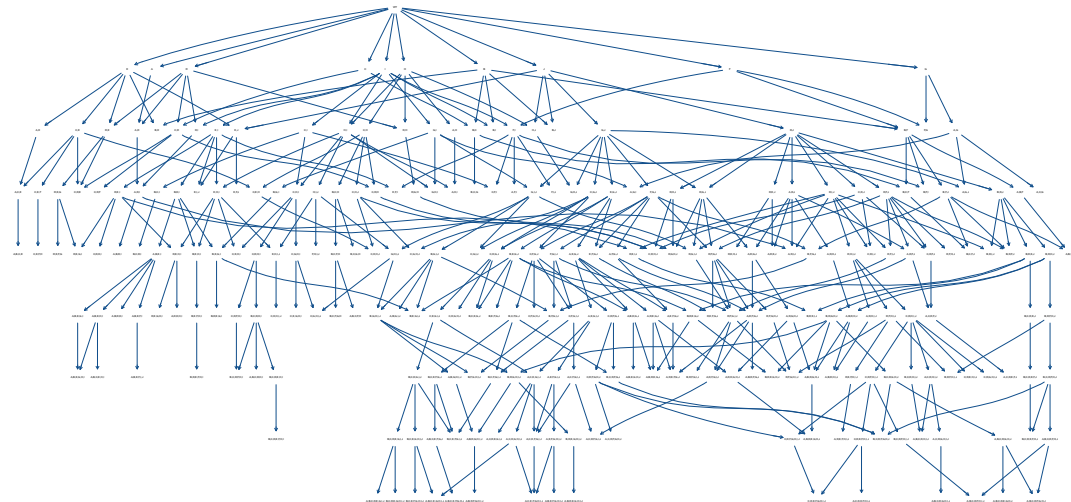



*ID* a3mOmQYxncb9Ad9p  
*acc genotypes* 284  
*peaks no back* 99  
*removed edges* NA  
*prop rem edges* NA

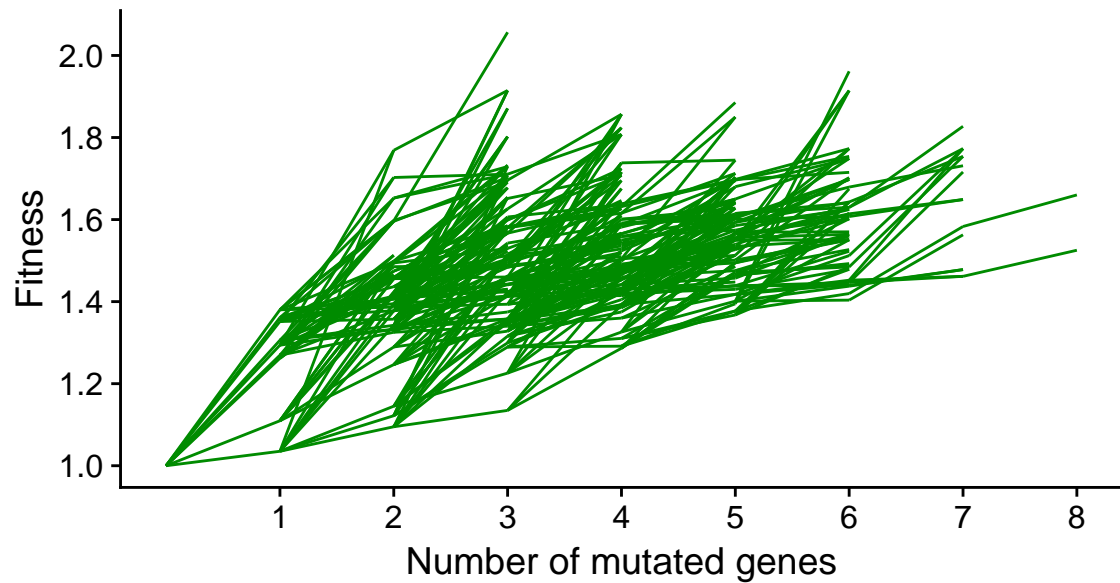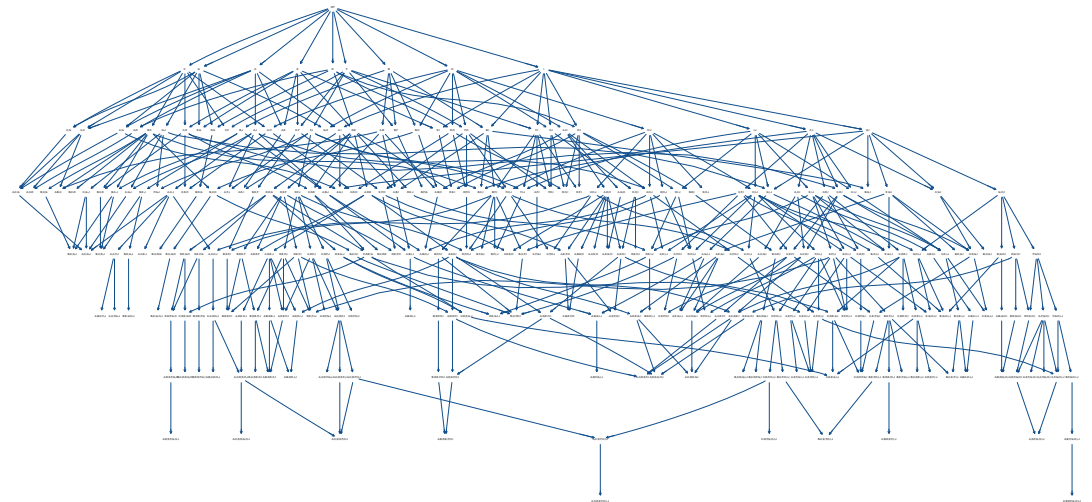

ID AbVs2SaYTXrETNTU  
 acc genotypes 47  
 peaks no back 21  
 removed edges NA  
 prop rem edges NA

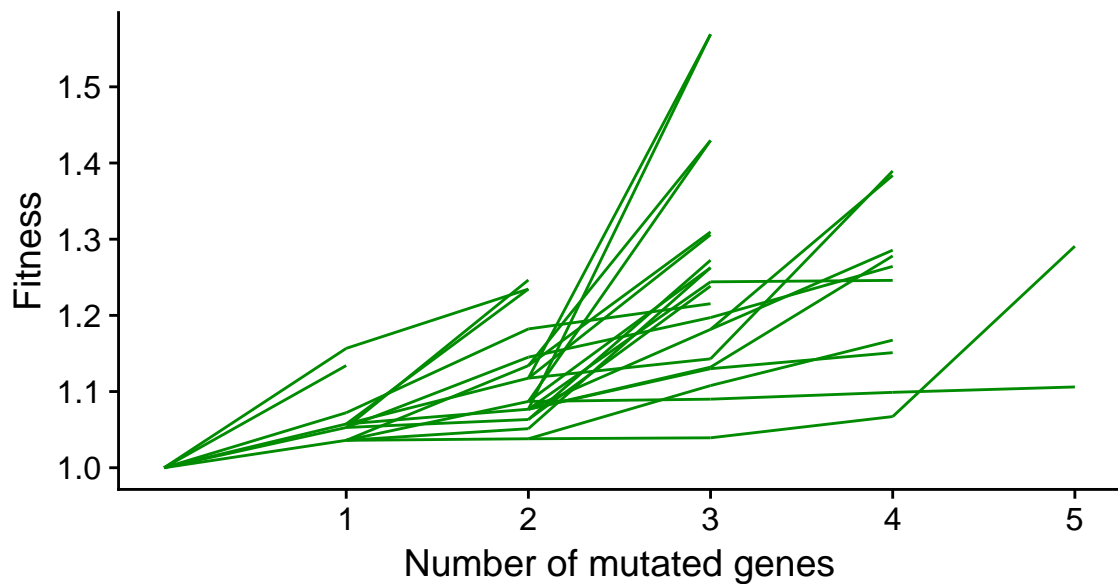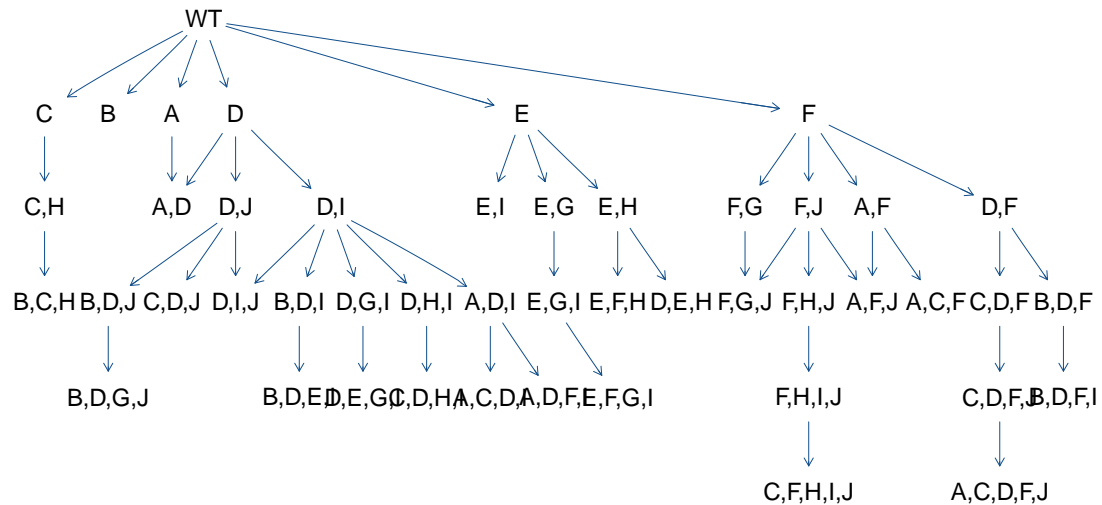

ID aCr61aKy6HuXLp5m  
 acc genotypes 180  
 peaks no back 53  
 removed edges NA  
 prop rem edges NA

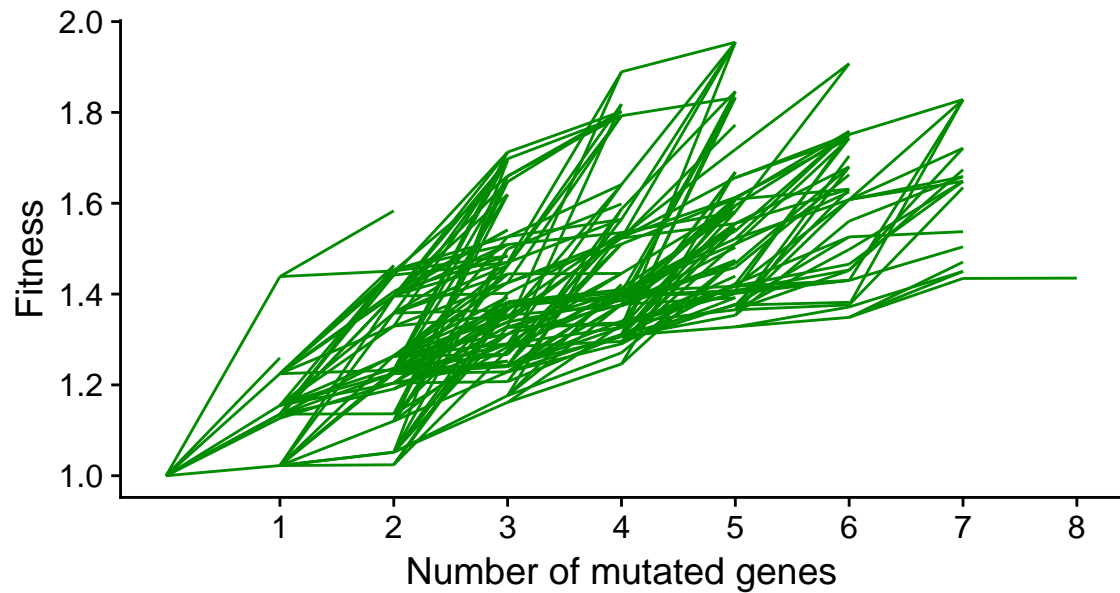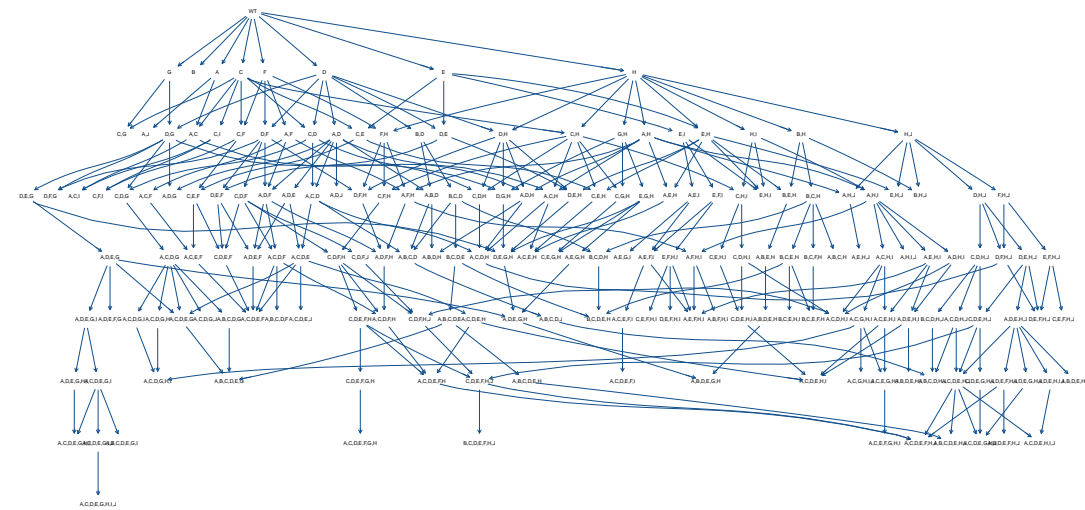

*ID* aEeRemo3Lxmgcy8w  
*acc genotypes* 311  
*peaks no back* 94  
*removed edges* NA  
*prop rem edges* NA

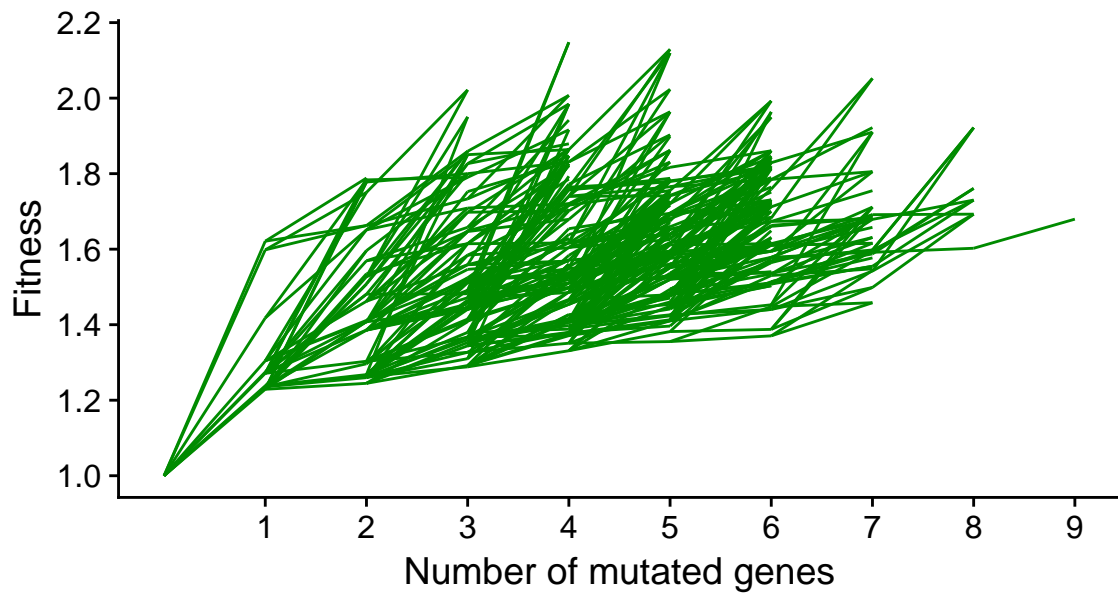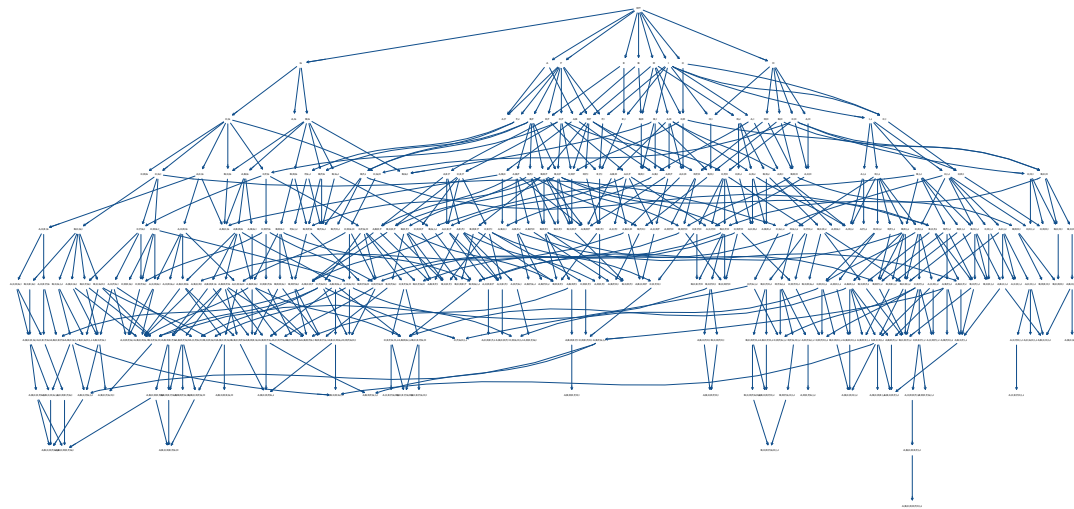

ID Ag710LDVSvAEgCIJ3  
 acc genotypes 50  
 peaks no back 19  
 removed edges NA  
 prop rem edges NA

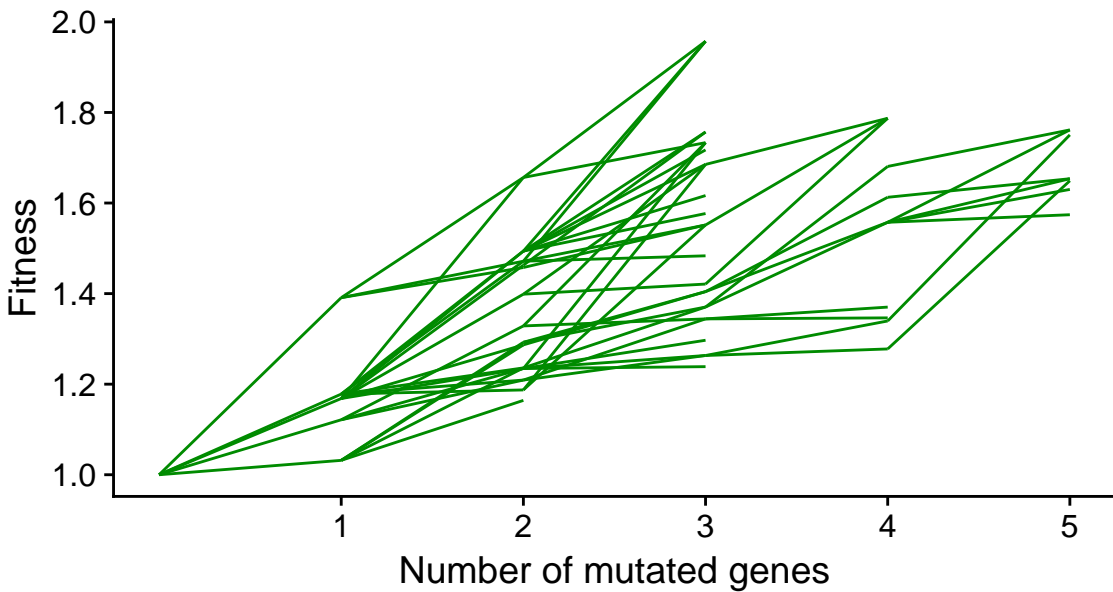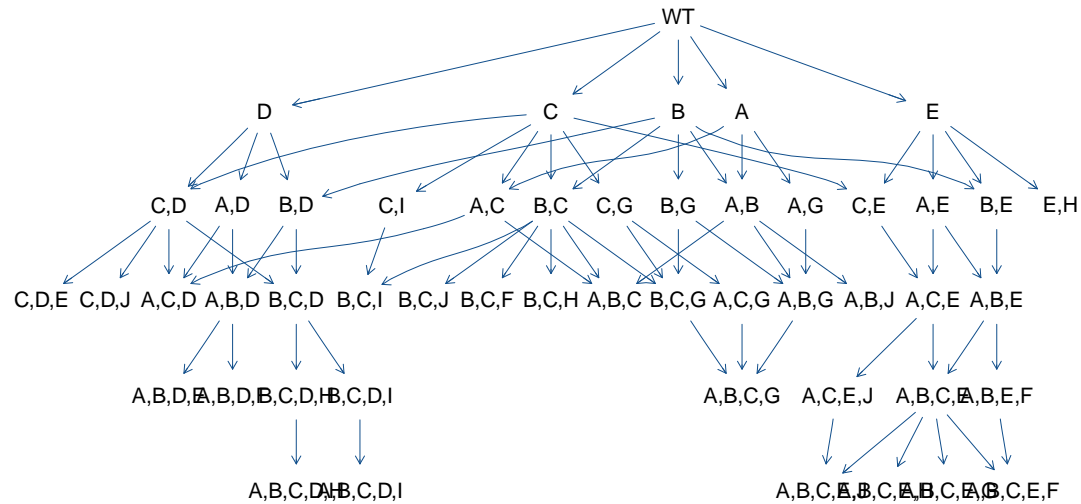

*ID* ahVo16NivbfzL4Zy  
*acc genotypes* 442  
*peaks no back* 56  
*removed edges* NA  
*prop rem edges* NA

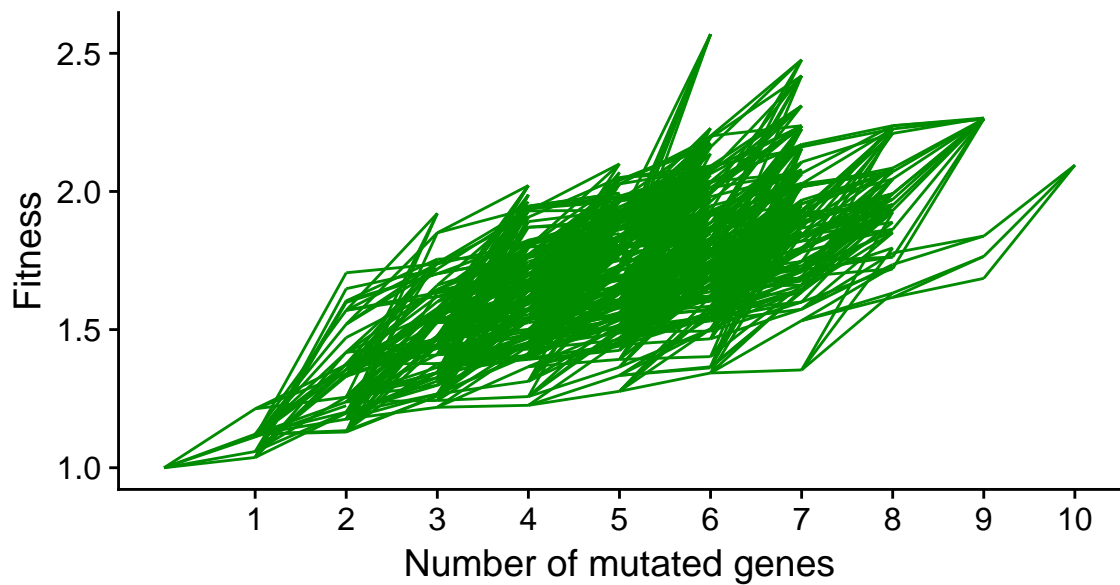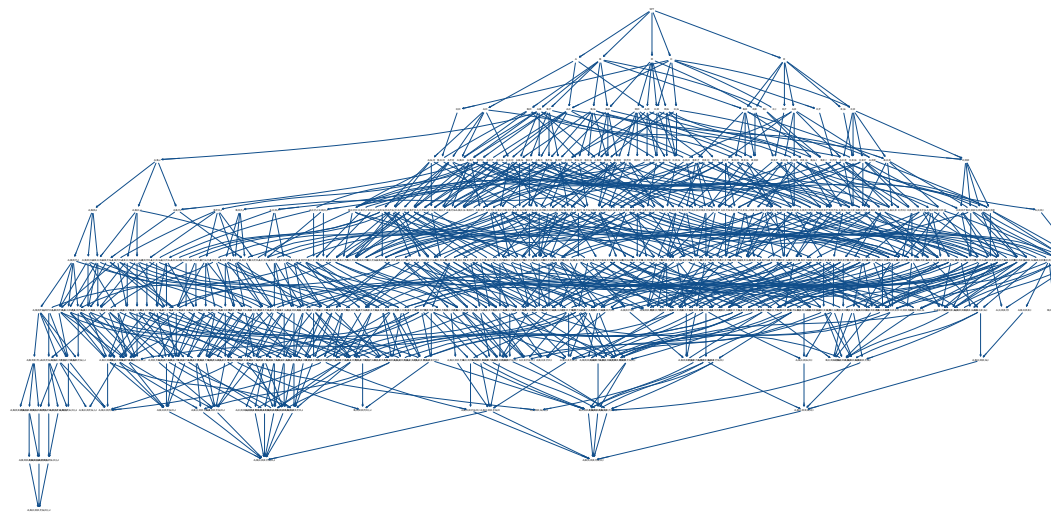

*ID* AOgjTmG9Hs4vtlBq  
*acc genotypes* 213  
*peaks no back* 62  
*removed edges* NA  
*prop rem edges* NA

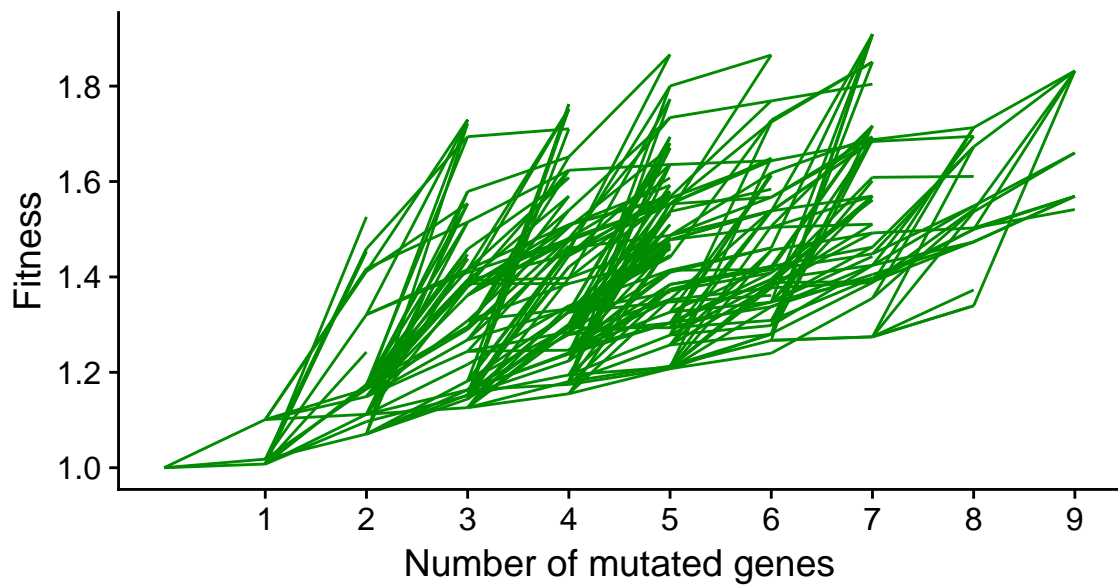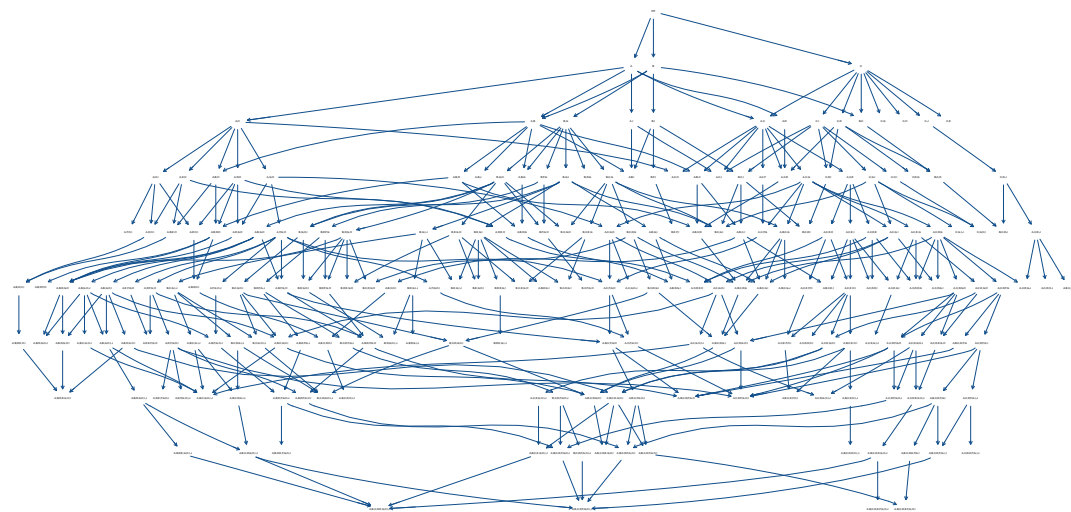

*ID* AXZ6AsdBRokekeDx  
*acc genotypes* 327  
*peaks no back* 60  
*removed edges* NA  
*prop rem edges* NA

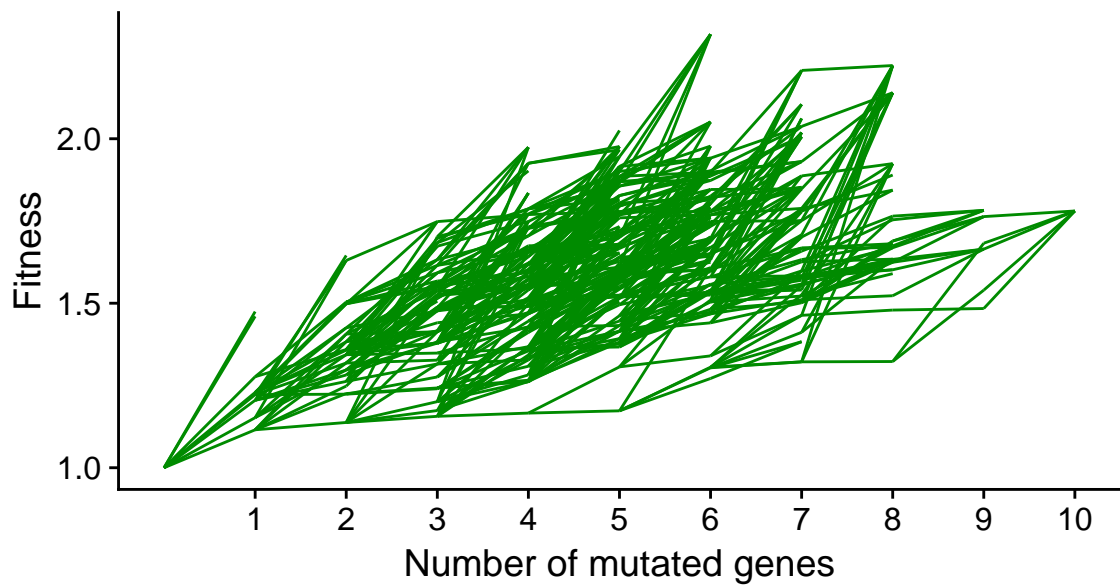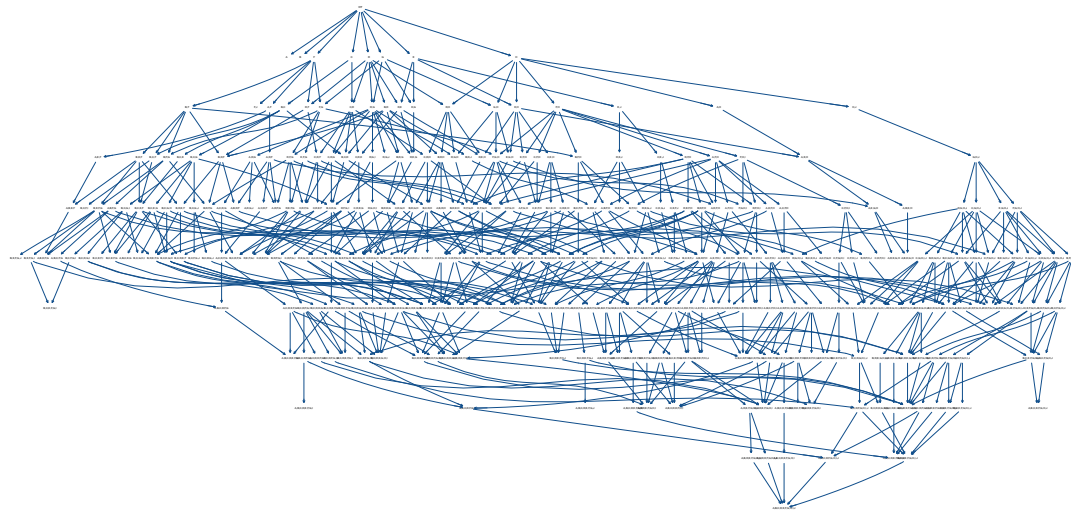



*ID* bFdmuJ1681ocZTYL  
*acc genotypes* 359  
*peaks no back* 88  
*removed edges* NA  
*prop rem edges* NA

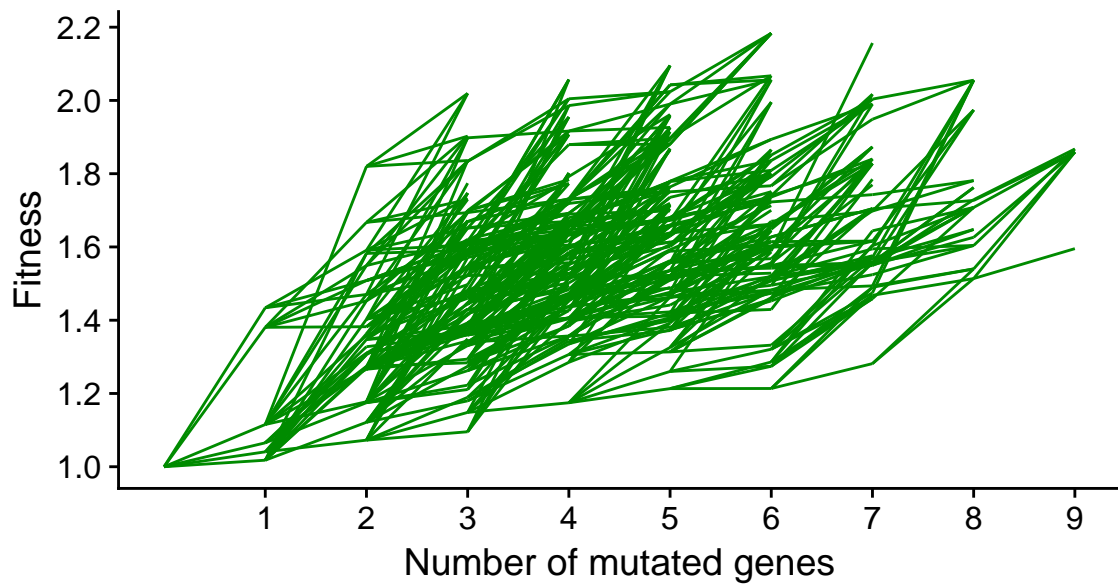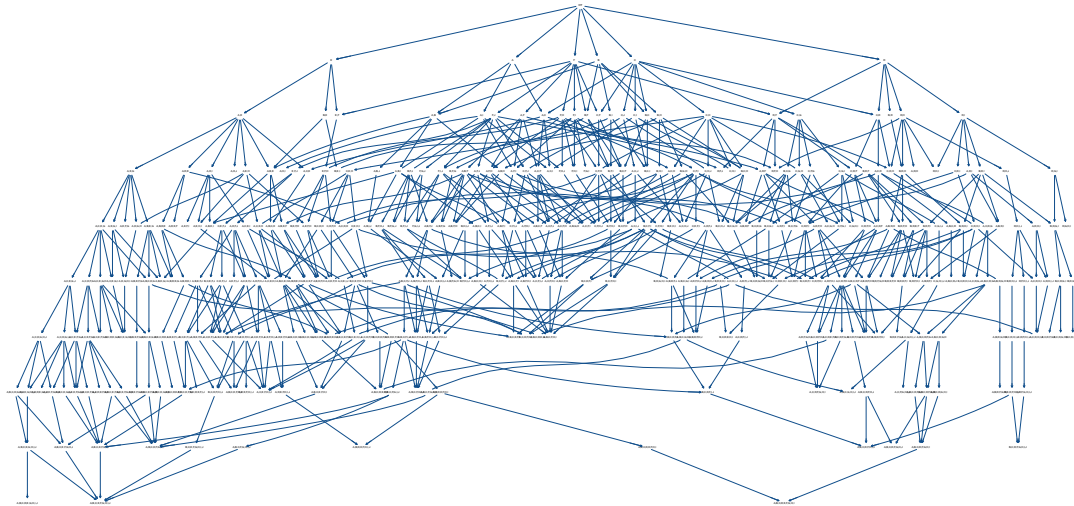

ID bGijXeZCPrEObkl  
 acc genotypes 183  
 peaks no back 53  
 removed edges NA  
 prop rem edges NA

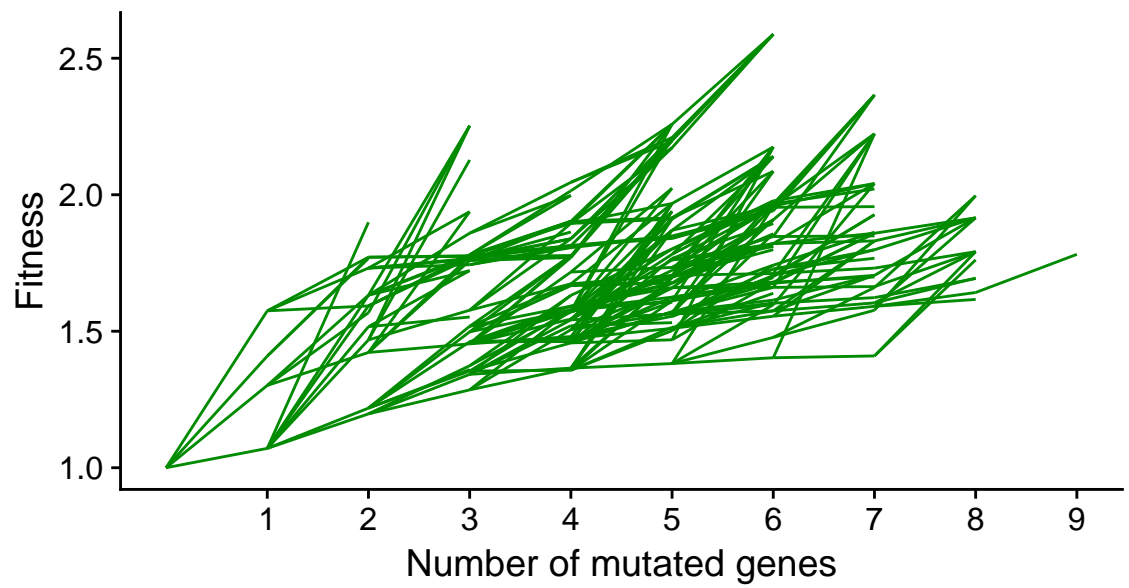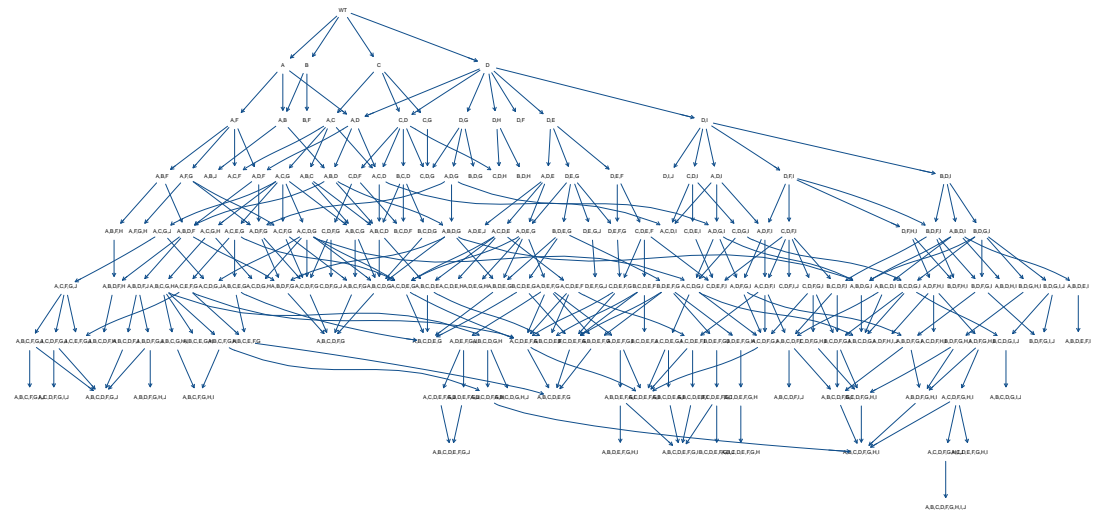

*ID* BnCqeBo4erAk6AAn  
*acc genotypes* 616  
*peaks no back* 76  
*removed edges* NA  
*prop rem edges* NA

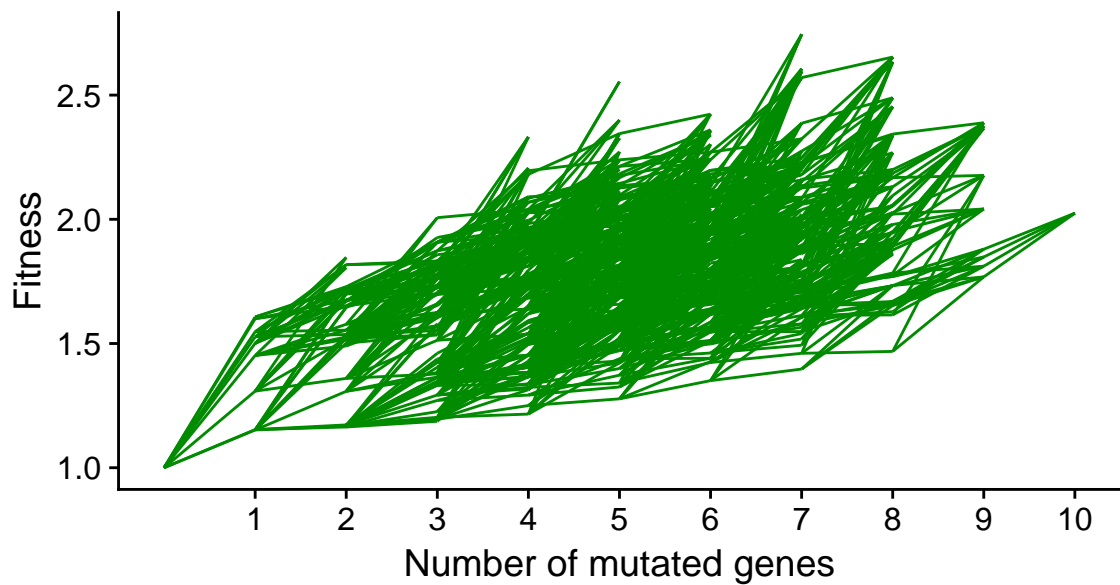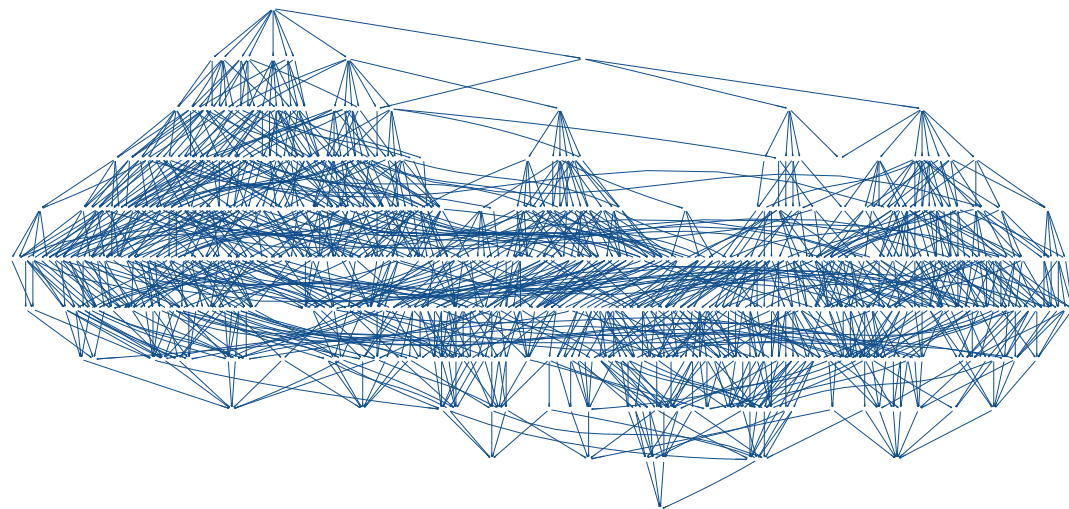

ID **bo1swth9Yj610ESJy**  
 acc genotypes **133**  
 peaks no back 40  
 removed edges NA  
 prop rem edges NA

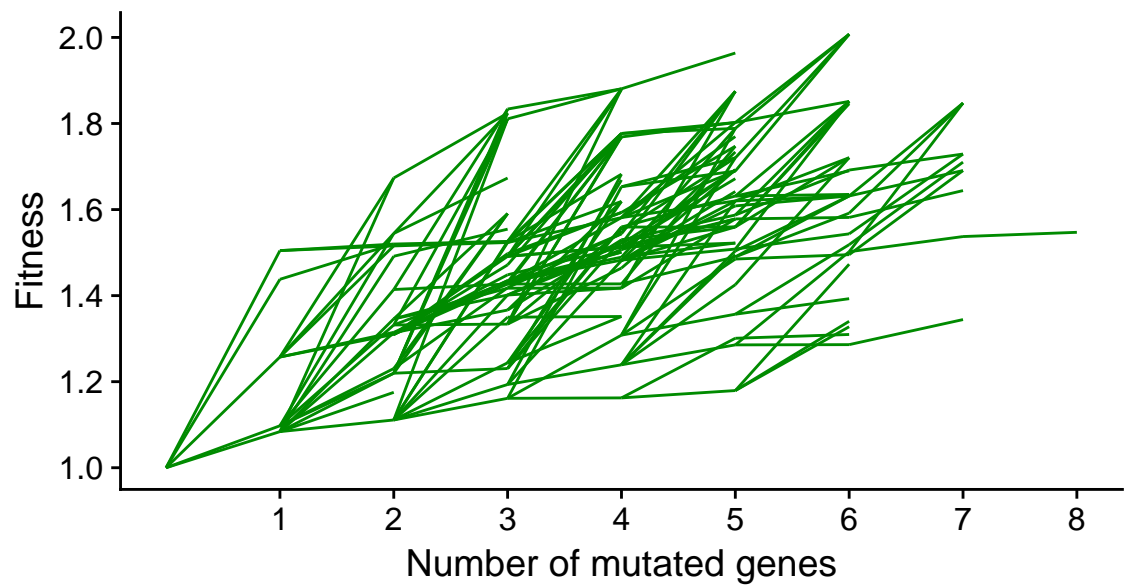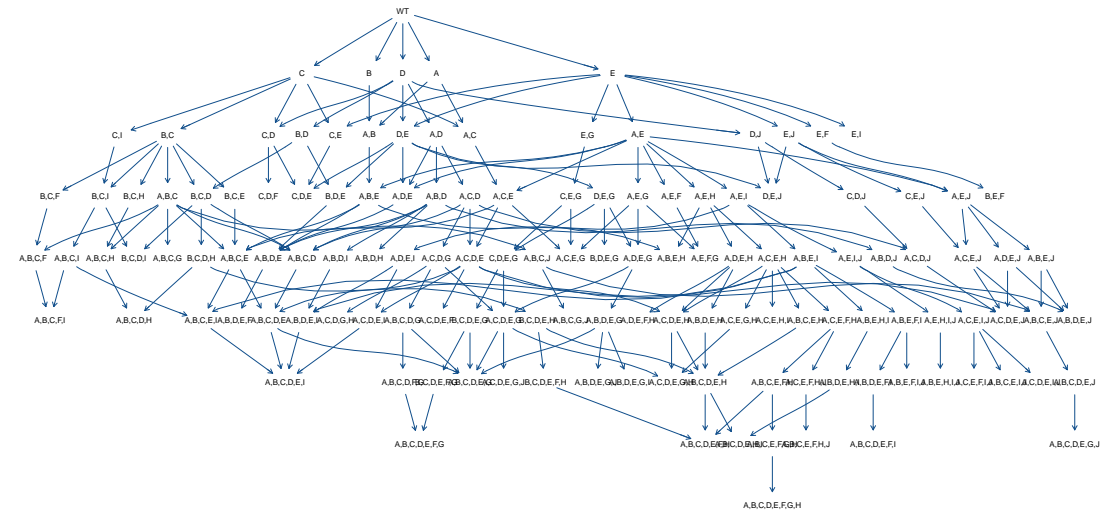

ID **bOw7SJCwZBwfZRmf**  
 acc genotypes **187**  
 peaks no back **71**  
 removed edges **NA**  
 prop rem edges **NA**

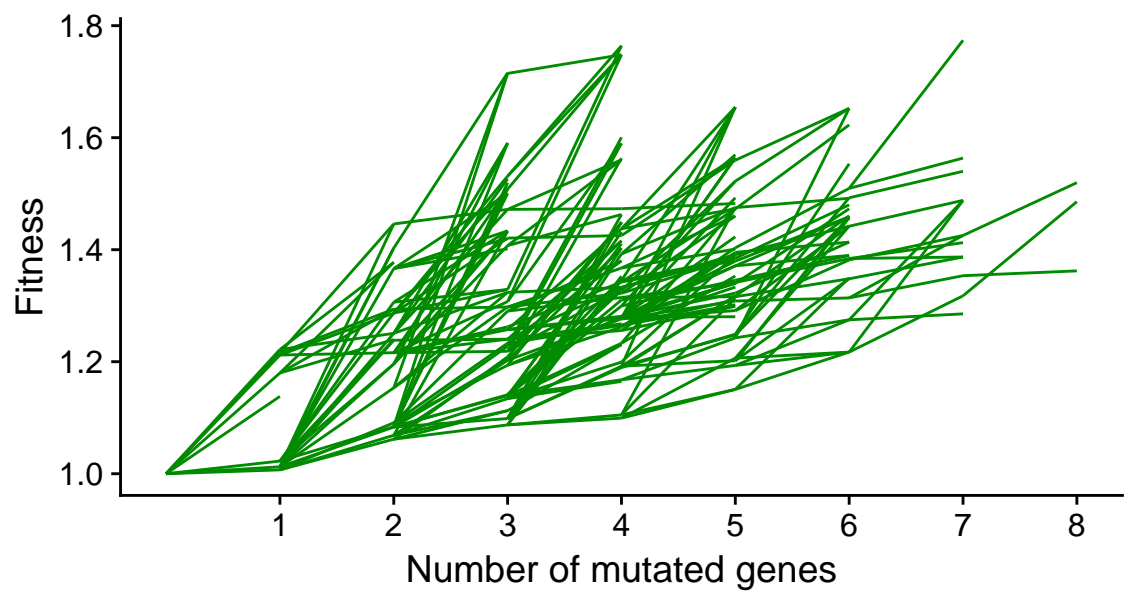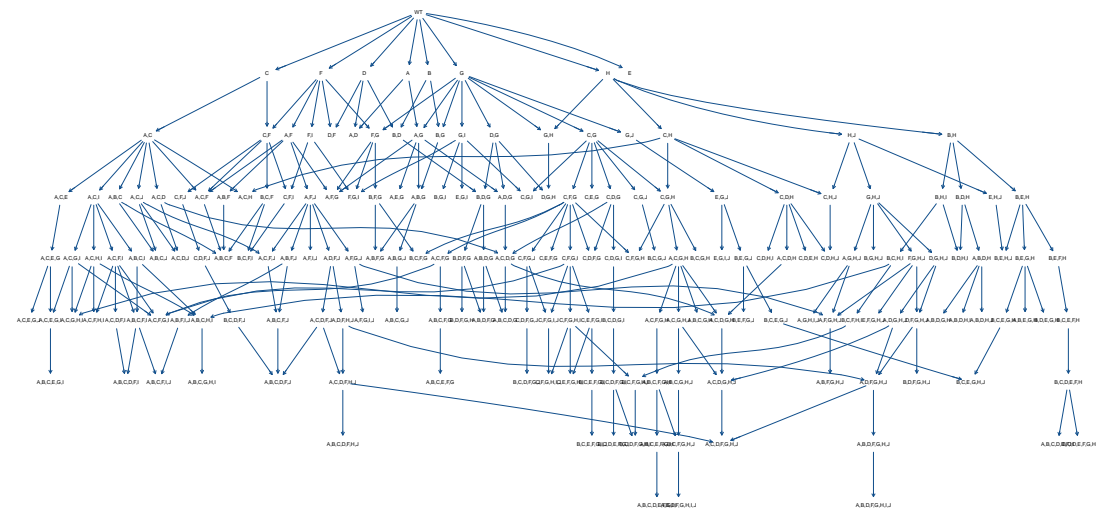

ID BtsRtS3YmmkCe2Gg  
 acc genotypes 50  
 peaks no back 18  
 removed edges NA  
 prop rem edges NA

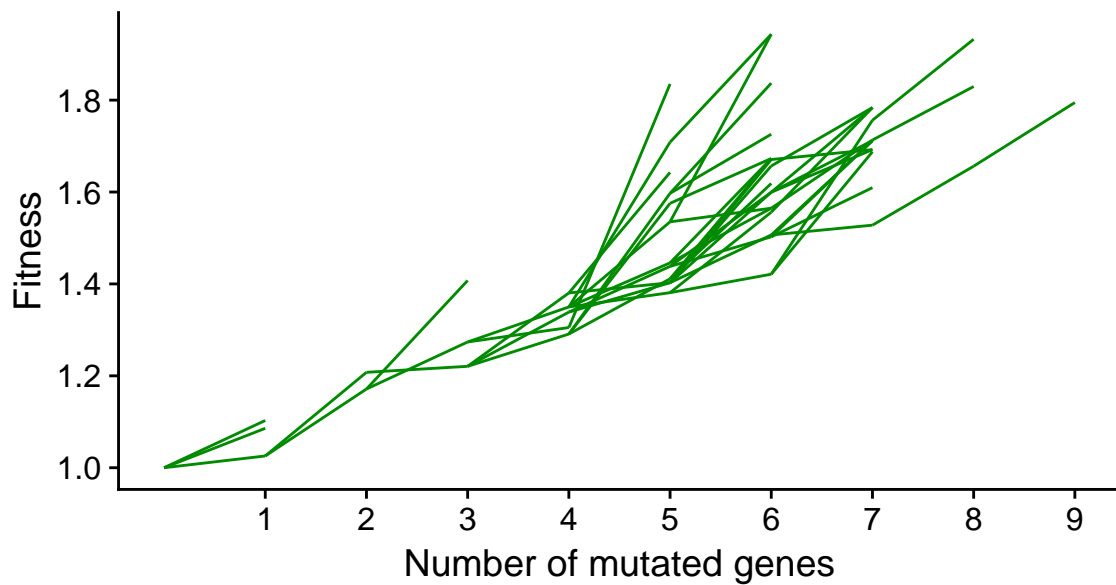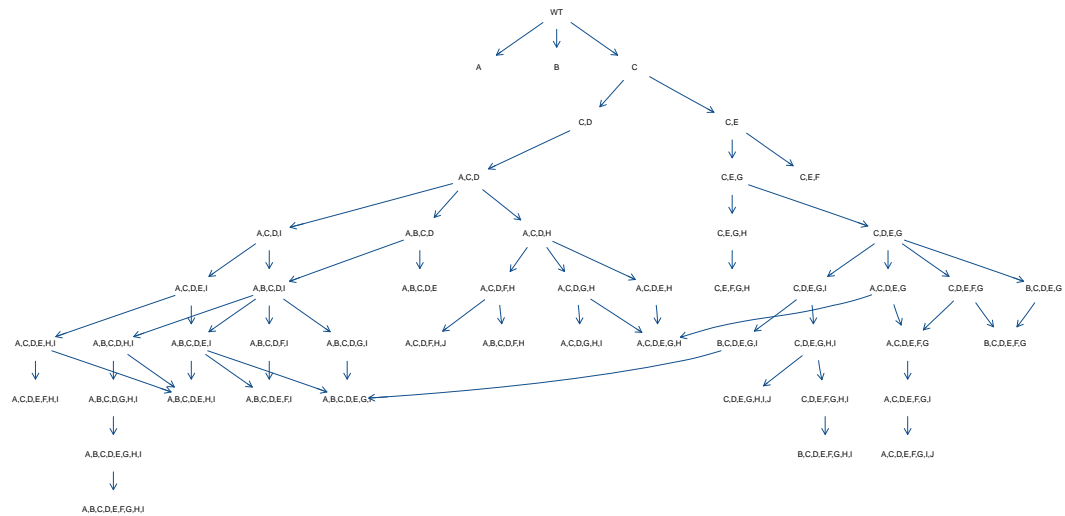

*ID* BWbL4g3bDhB87PnG  
*acc genotypes* 405  
*peaks no back* 99  
*removed edges* NA  
*prop rem edges* NA

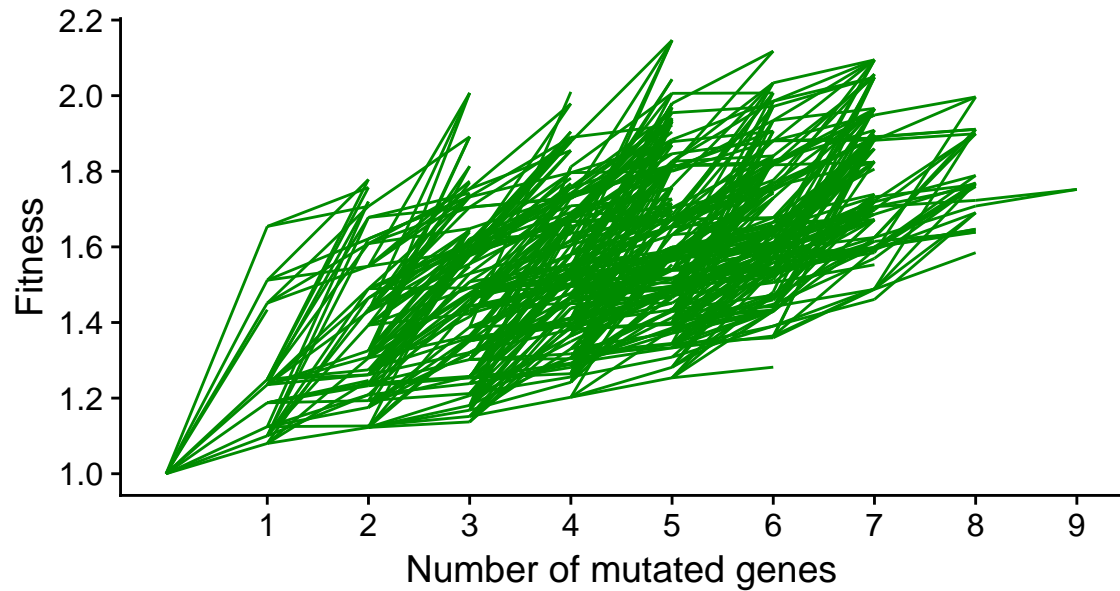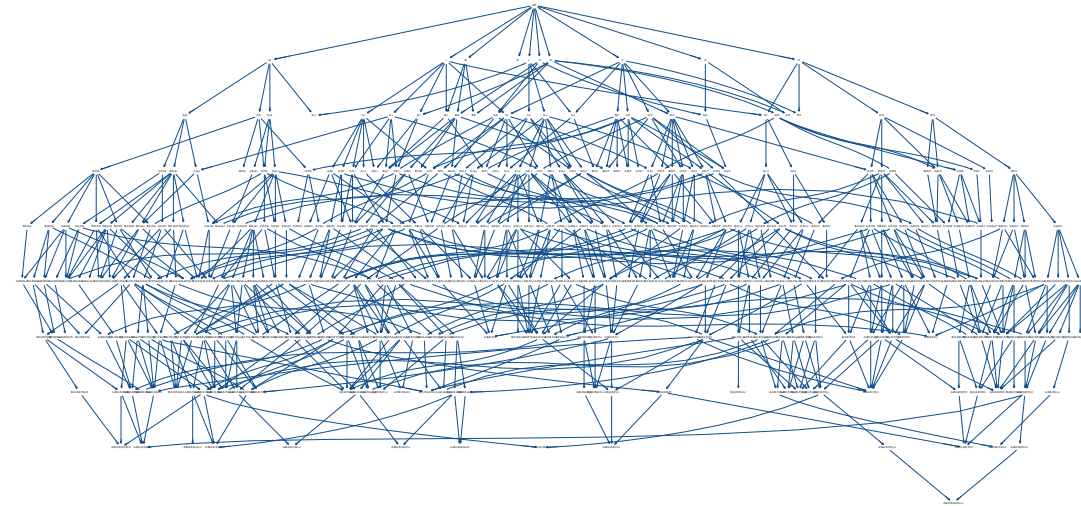

ID C1zvP9CZFCg9avLi  
 acc genotypes 102  
 peaks no back 44  
 removed edges NA  
 prop rem edges NA

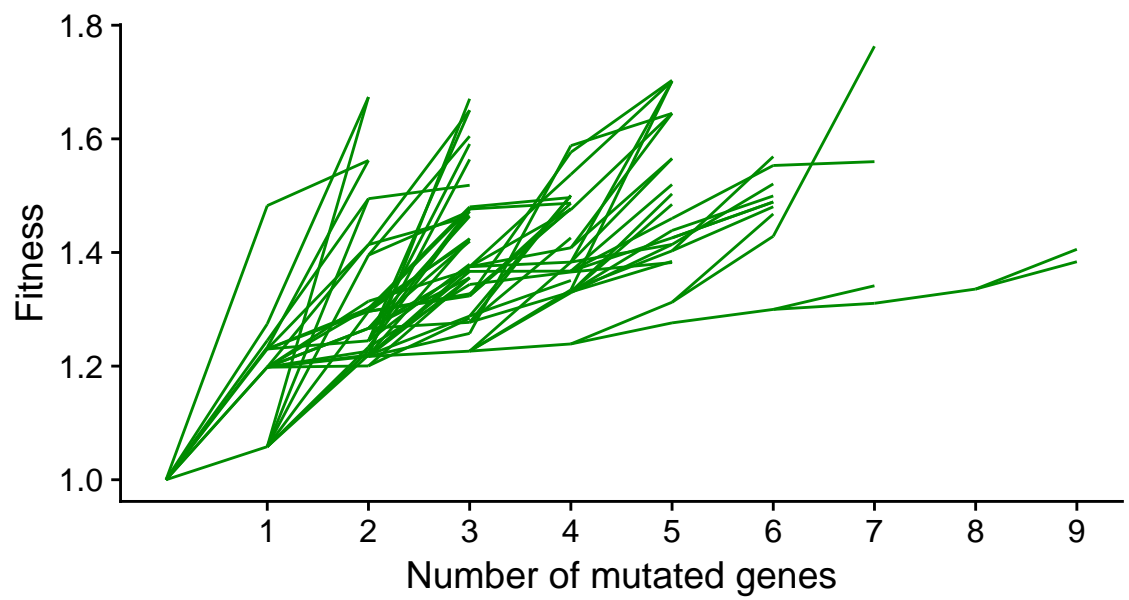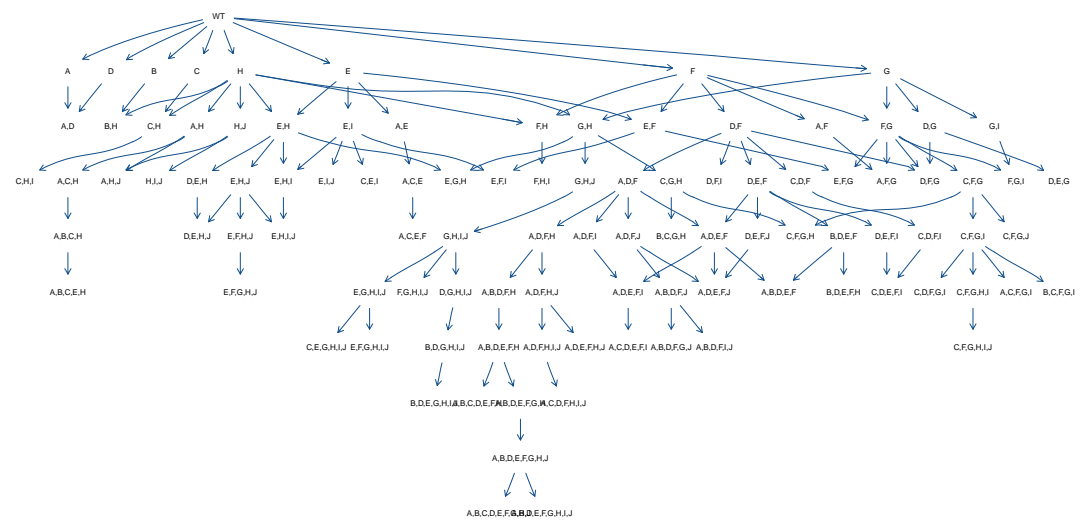



*ID* c21LhpXICZKWnkC5  
*acc genotypes* 493  
*peaks no back* 93  
*removed edges* NA  
*prop rem edges* NA

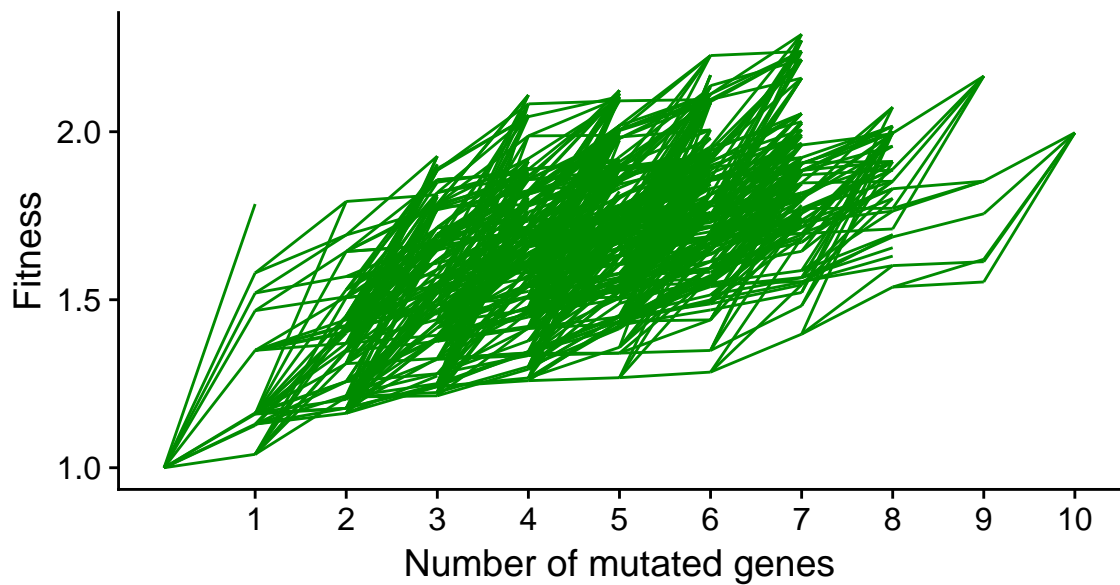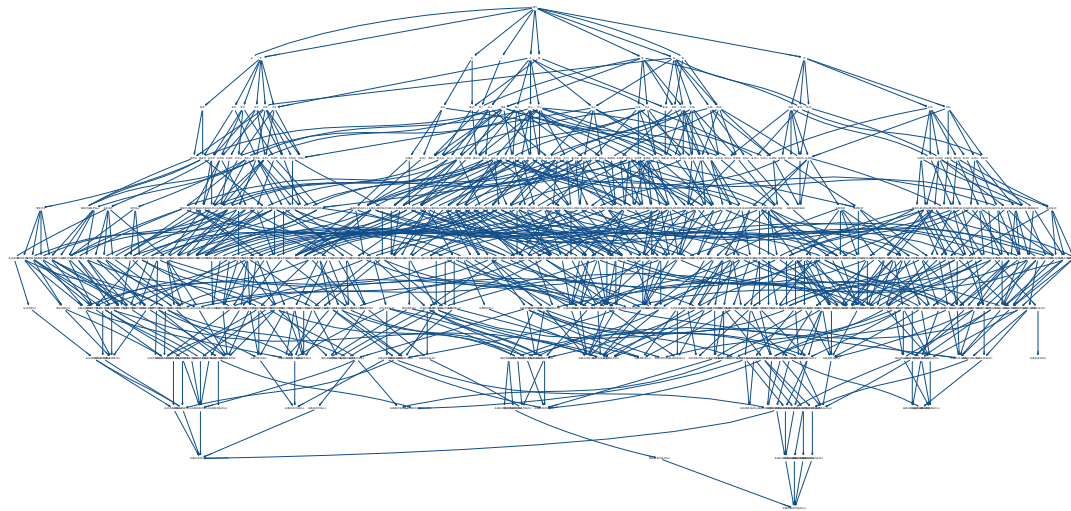

ID C46MDiN7E3KDR5Fu  
 acc genotypes 143  
 peaks no back 61  
 removed edges NA  
 prop rem edges NA

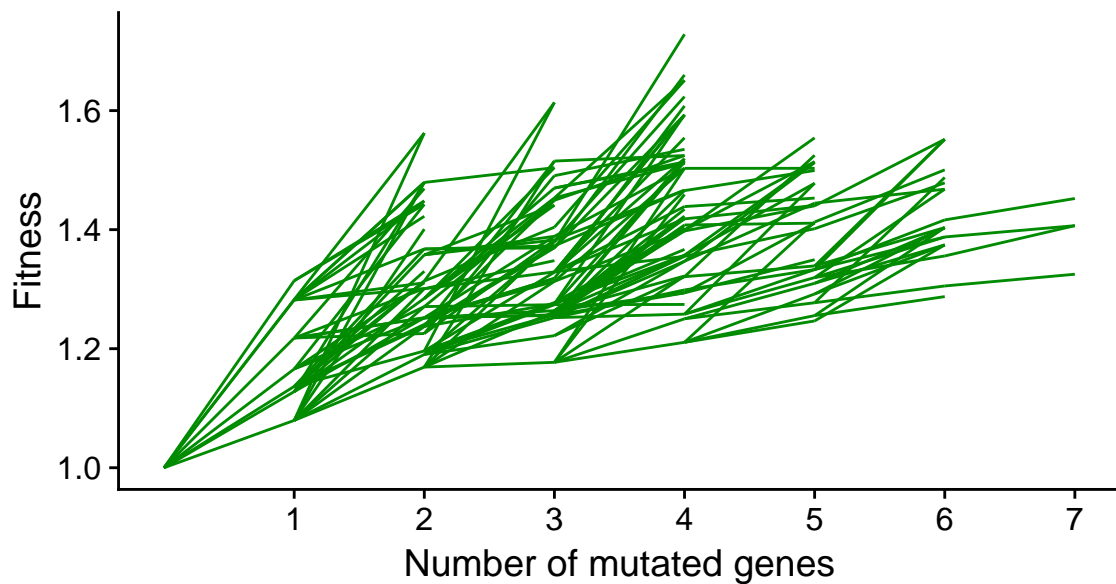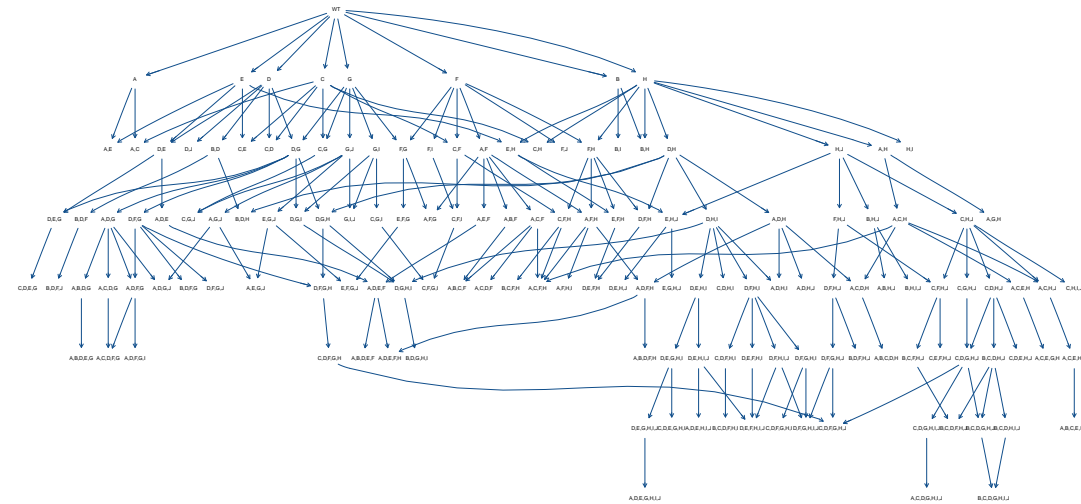

*ID* C0oTZ3S17BxN8HQx  
*acc genotypes* 209  
*peaks no back* 75  
*removed edges* NA  
*prop rem edges* NA

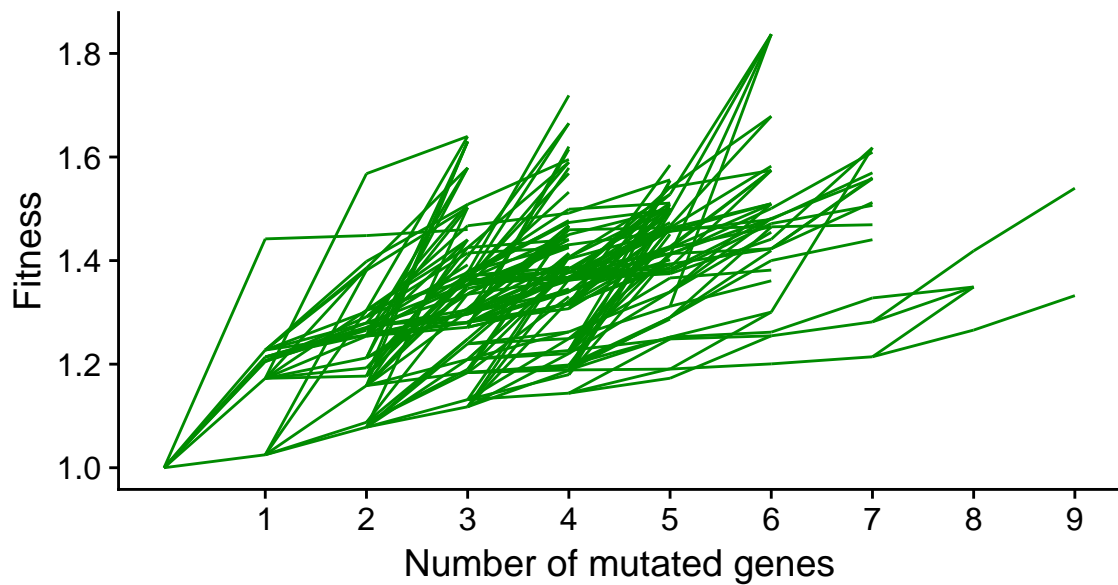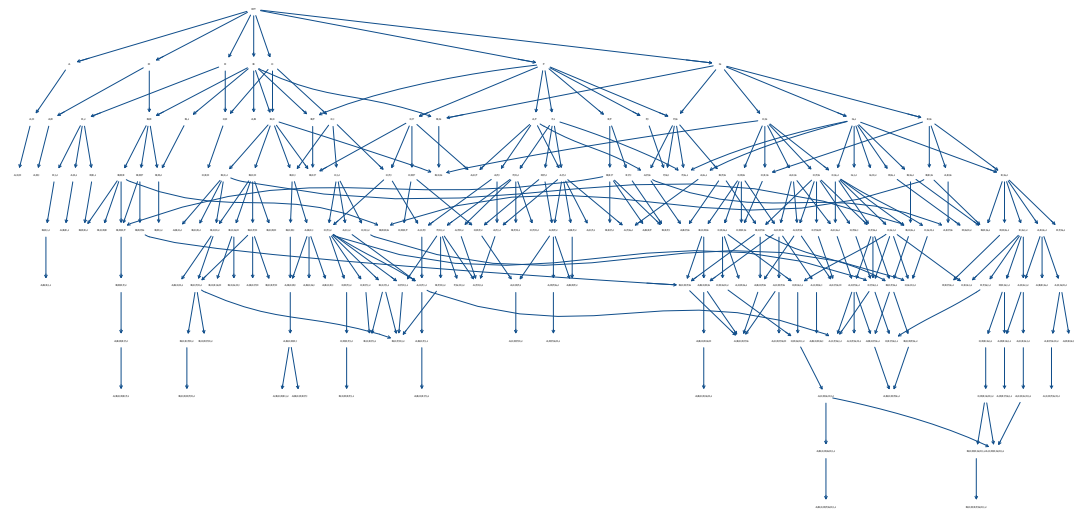

ID CscphnR9HTju10jKi  
 acc genotypes 54  
 peaks no back 14  
 removed edges NA  
 prop rem edges NA

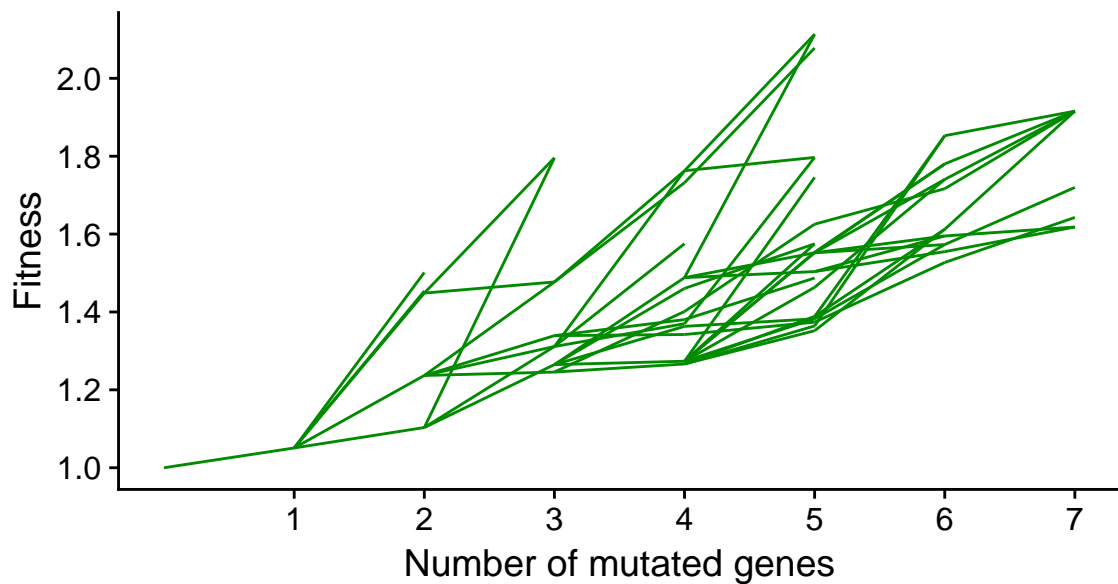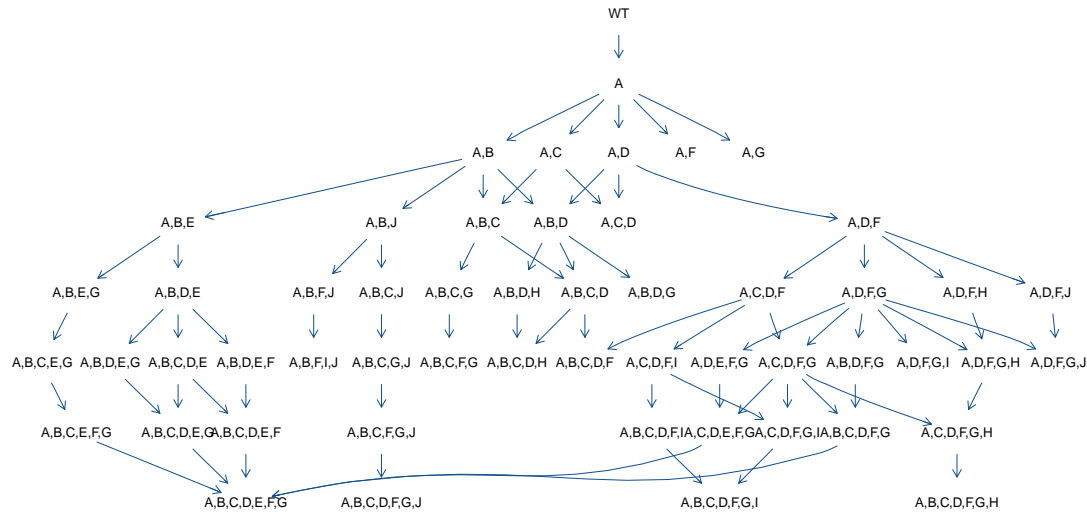

ID CxyK18ZkyGMIHEBy  
 acc genotypes 101  
 peaks no back 37  
 removed edges NA  
 prop rem edges NA

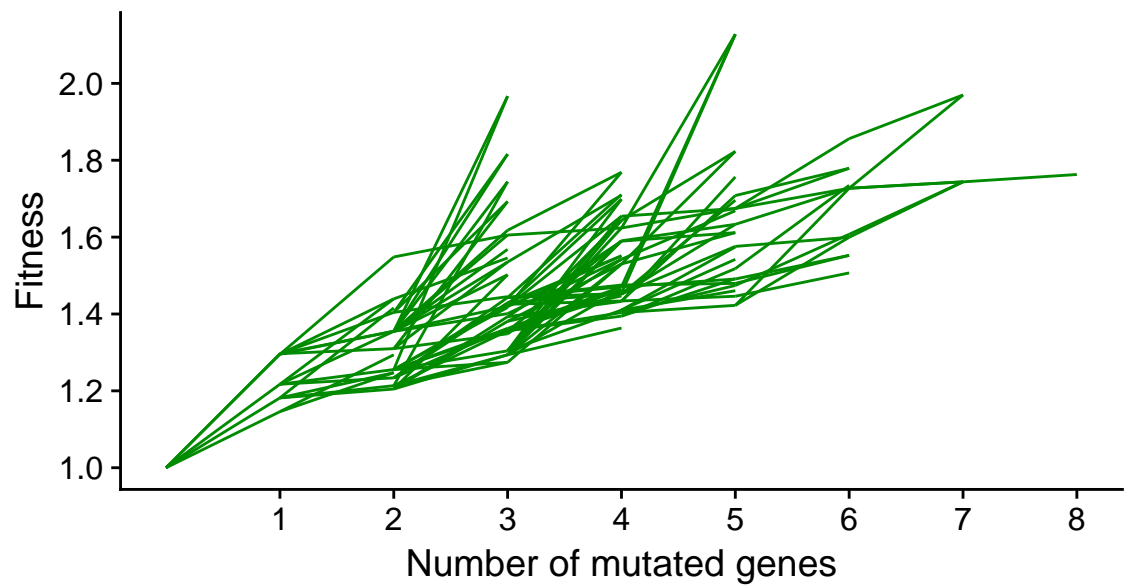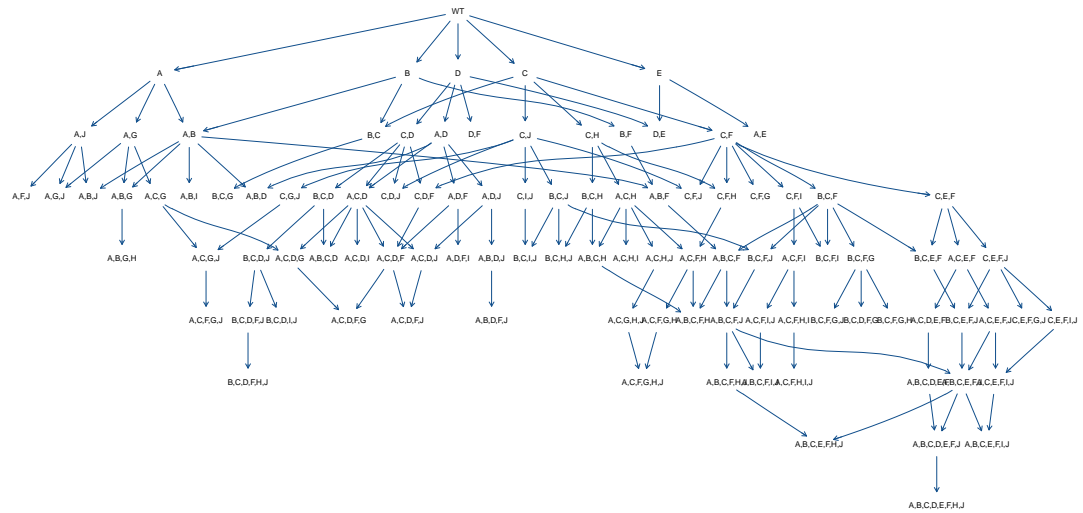

*ID* d107ojrARayuzrHeN  
*acc genotypes* 482  
*peaks no back* 107  
*removed edges* NA  
*prop rem edges* NA

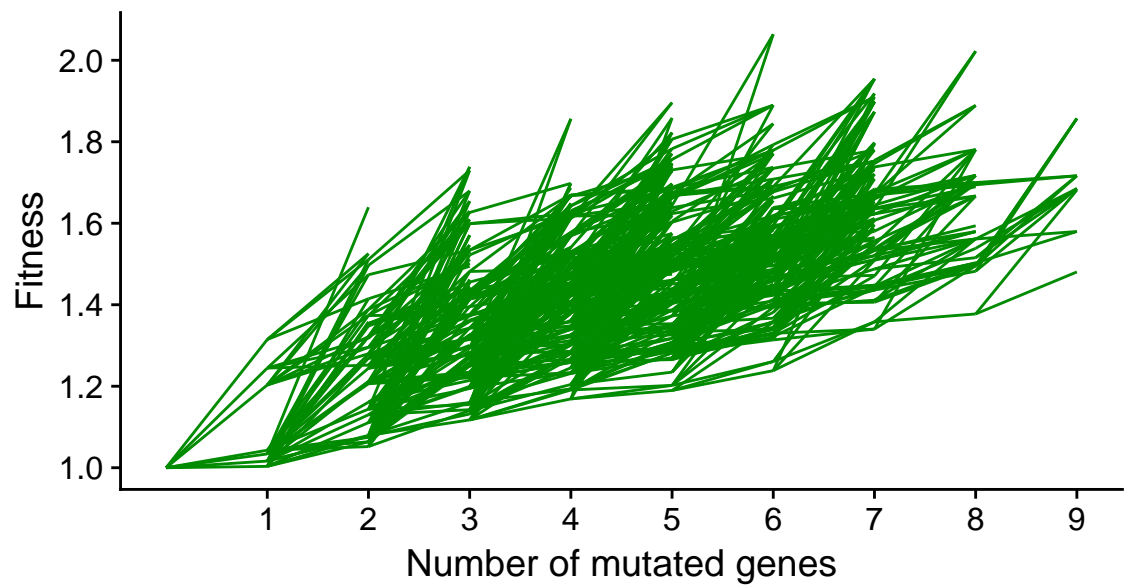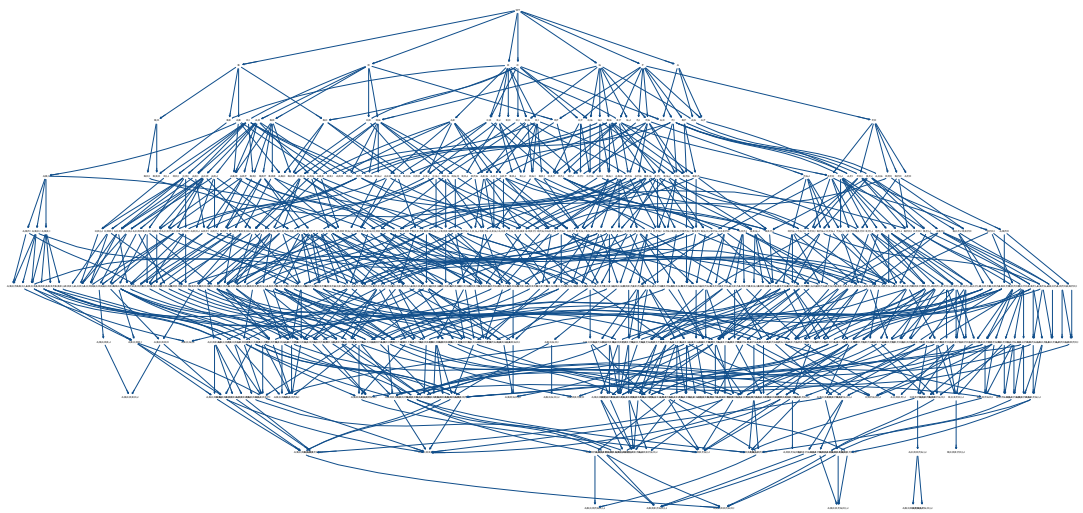

*ID* DF1iteAjjgrOq9G  
*acc genotypes* 240  
*peaks no back* 84  
*removed edges* NA  
*prop rem edges* NA

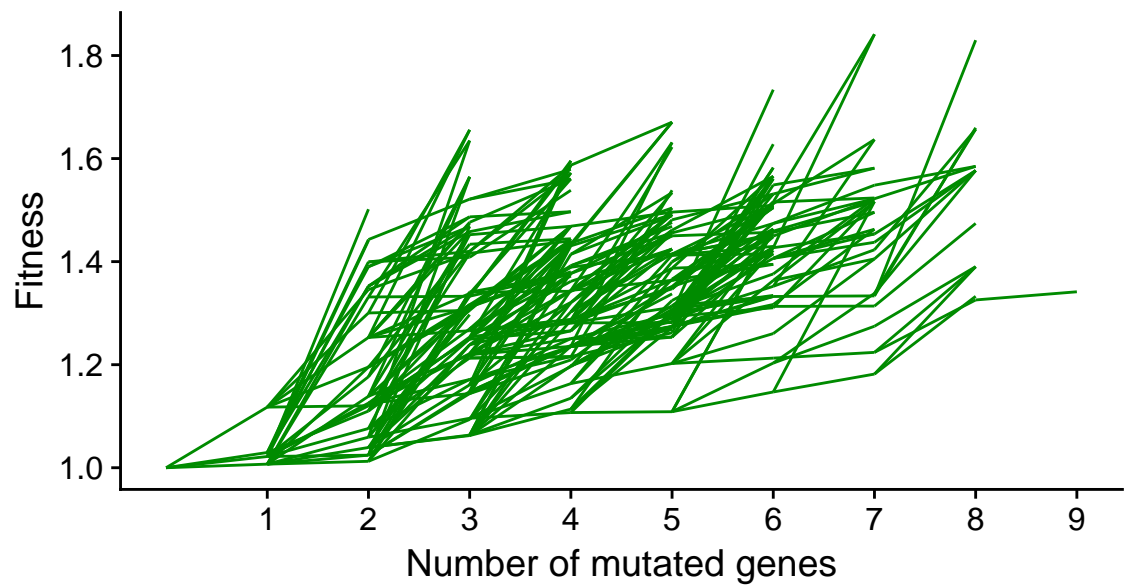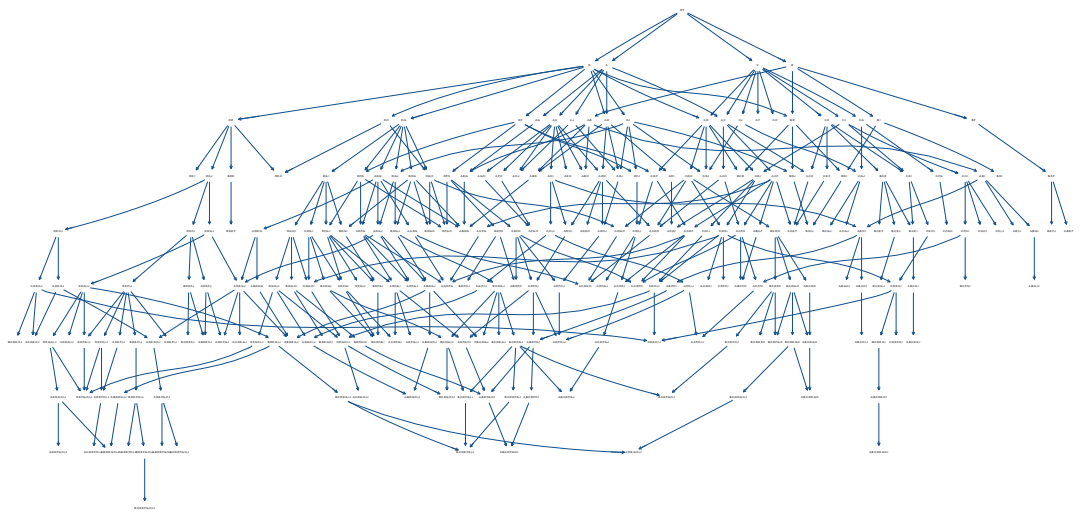

*ID* DvGWOEzyGFaVOowT  
*acc genotypes* 577  
*peaks no back* 93  
*removed edges* NA  
*prop rem edges* NA

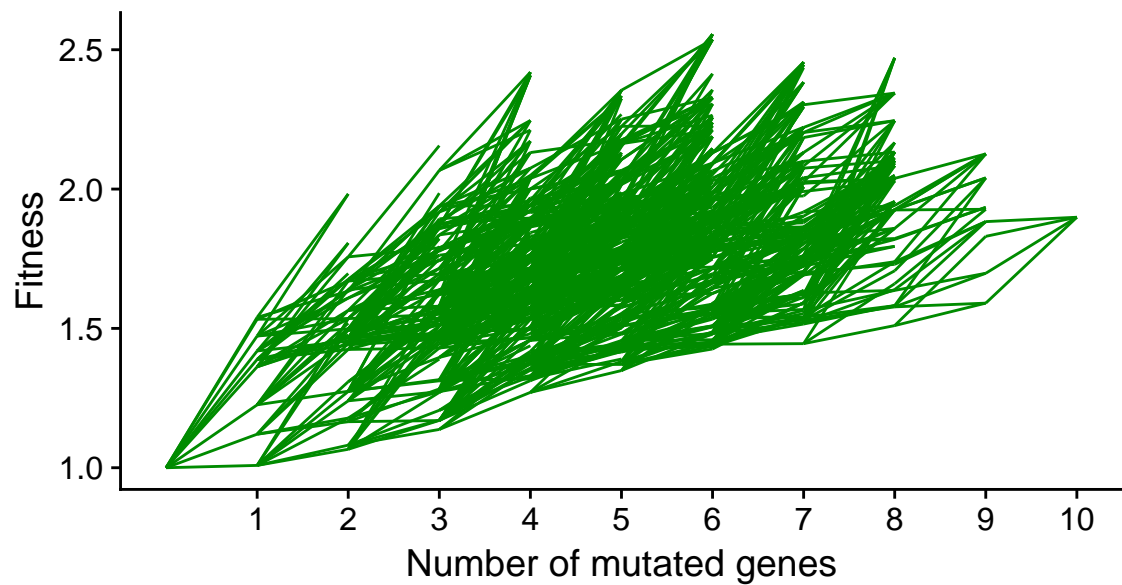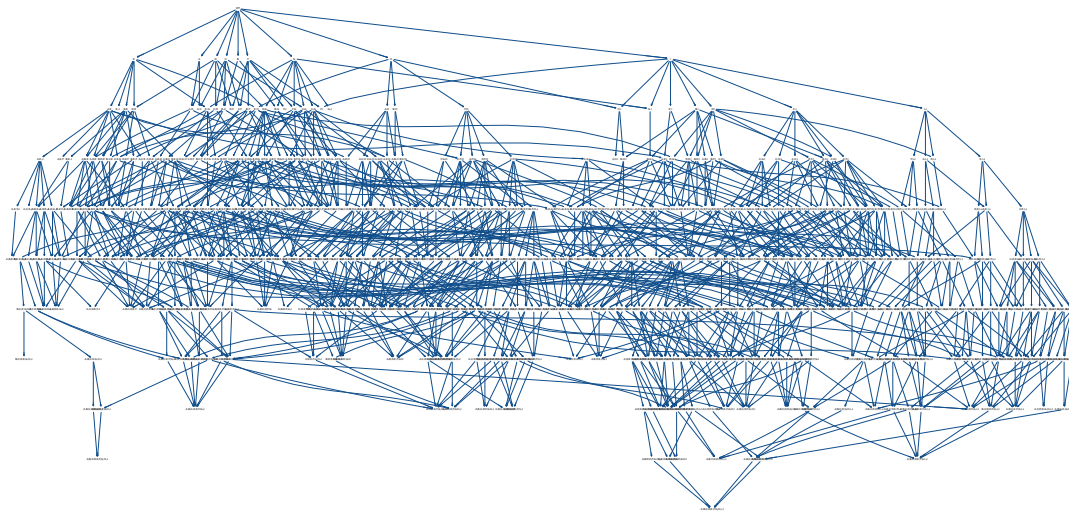



*ID* dzb4OOvYv11WGeeP  
*acc genotypes* 394  
*peaks no back* 83  
*removed edges* NA  
*prop rem edges* NA

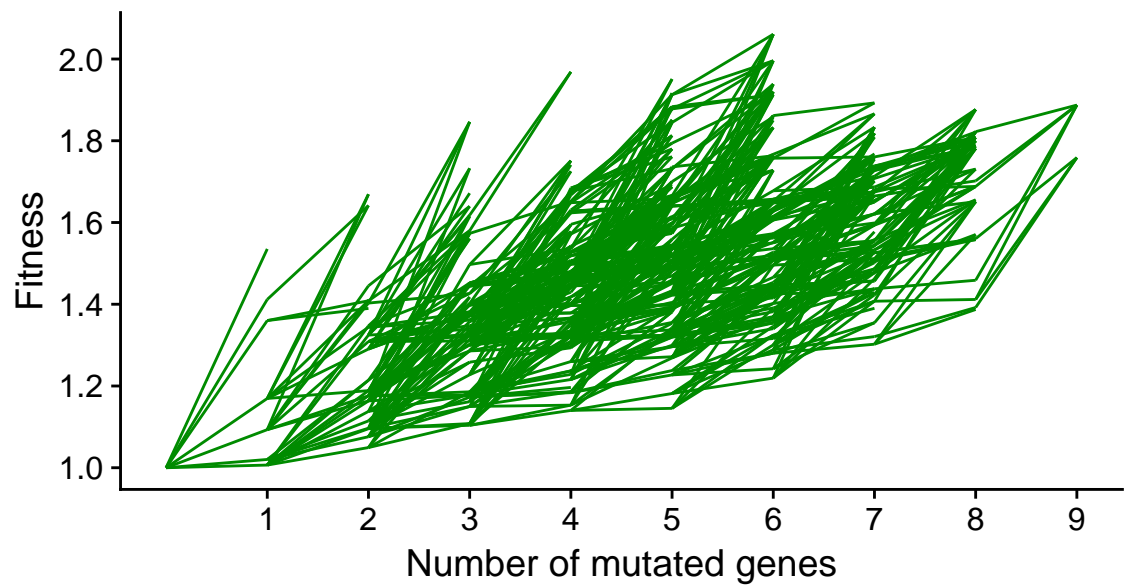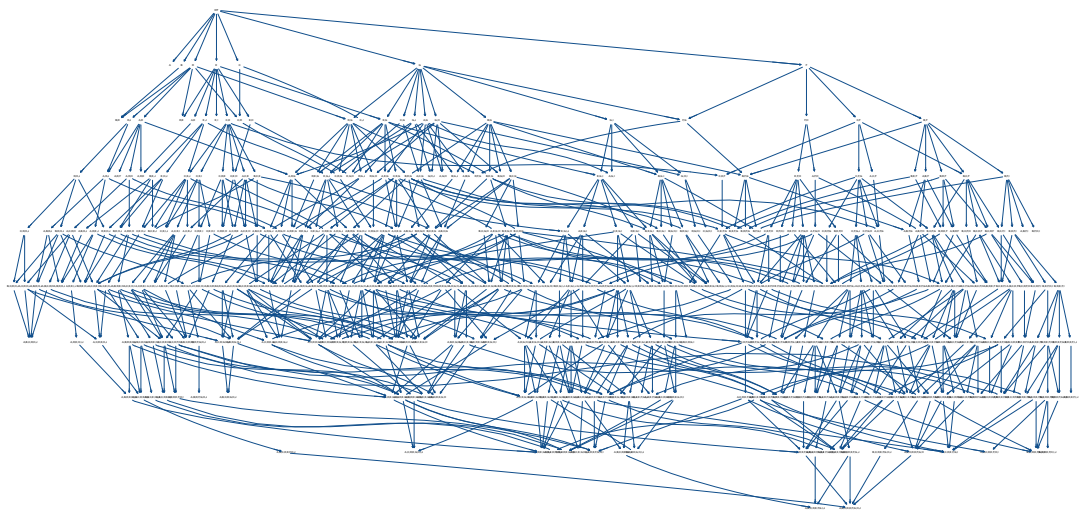

*ID* EgkeUuvhLZsyQQ110  
*acc genotypes* 283  
*peaks no back* 50  
*removed edges* NA  
*prop rem edges* NA

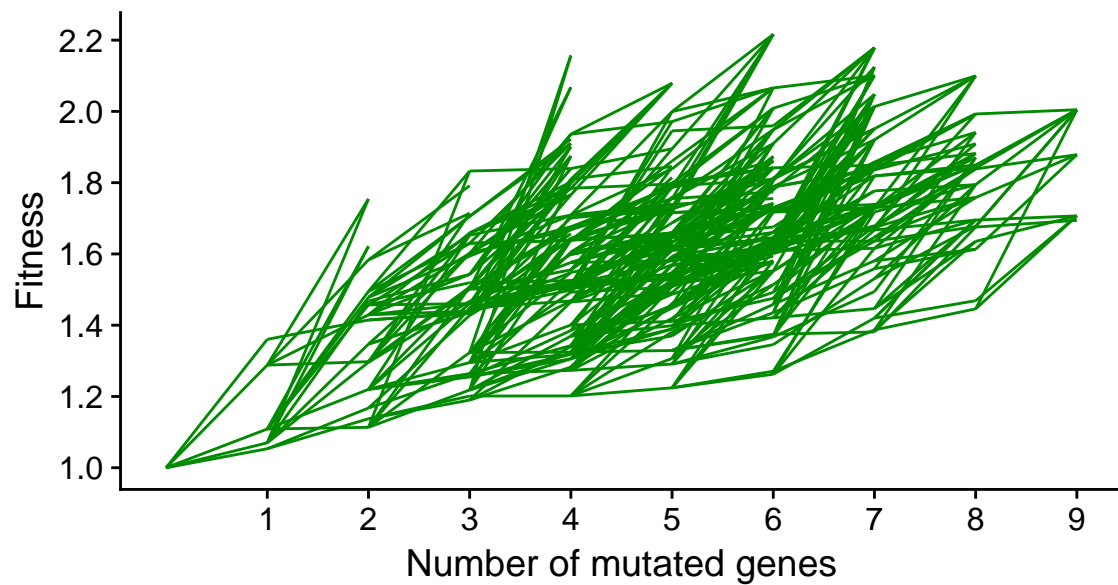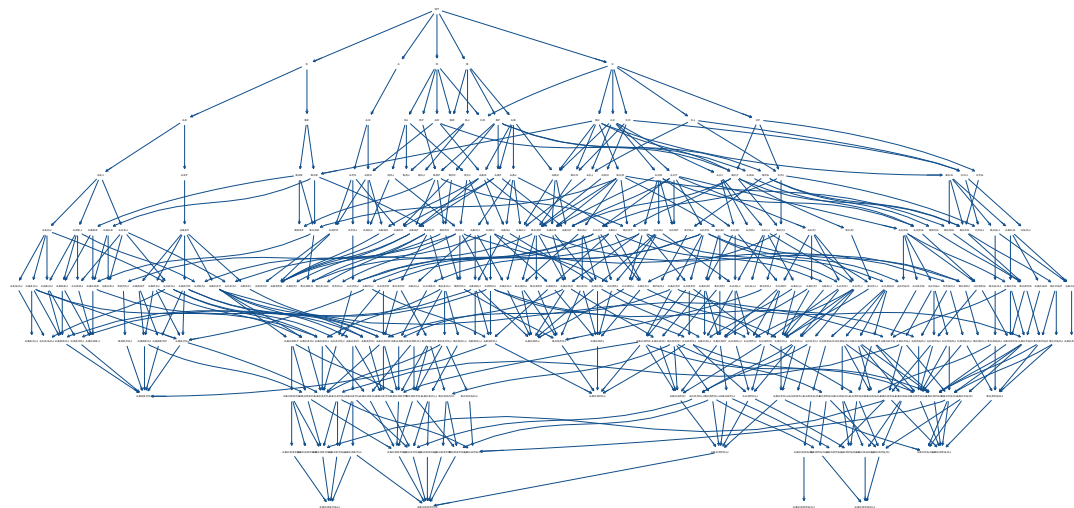

*ID* e1l49J4HyU8o710iq  
*acc genotypes* 576  
*peaks no back* 83  
*removed edges* NA  
*prop rem edges* NA

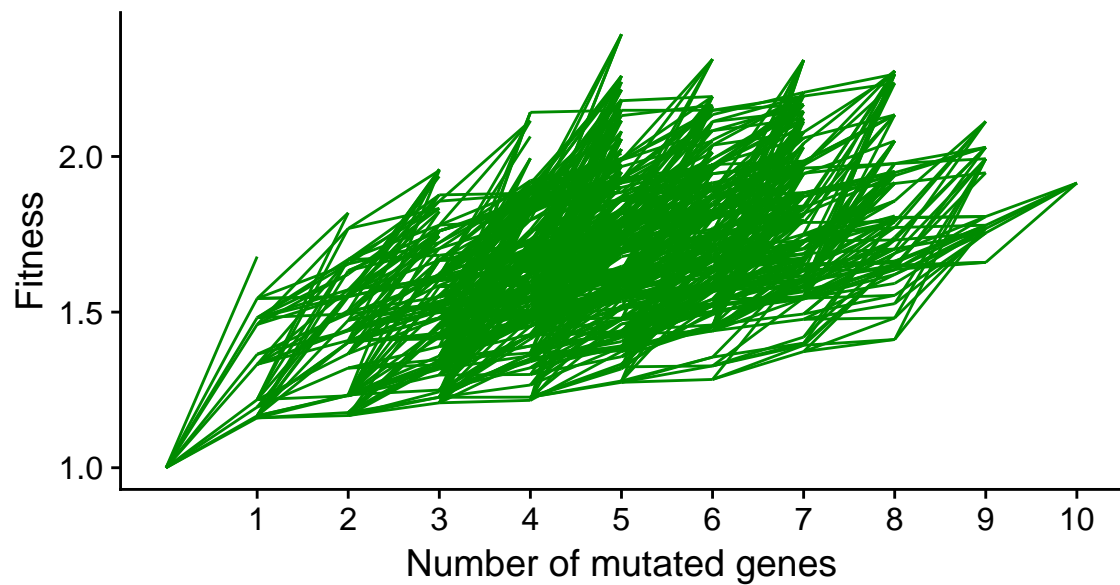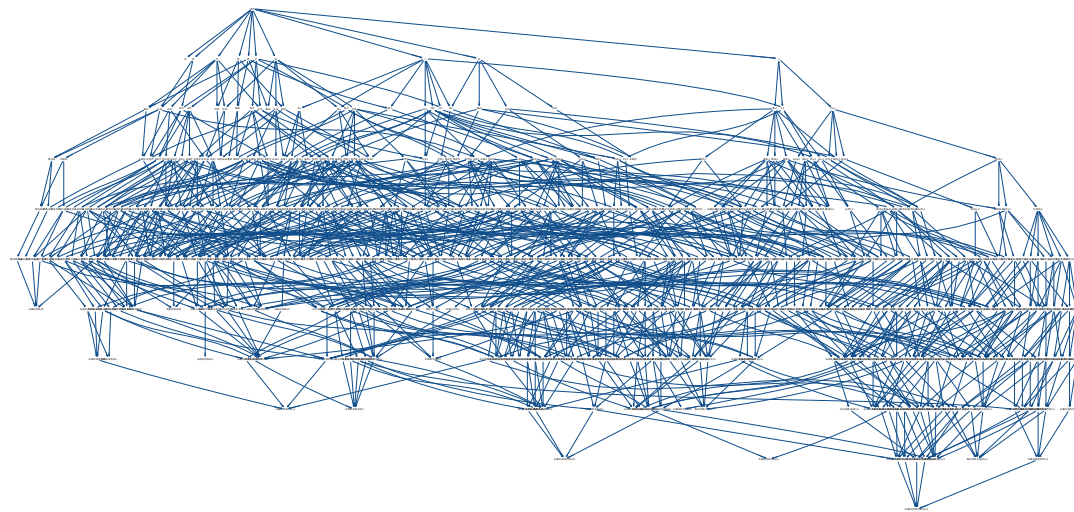

*ID* EMBpnzI5vOYpYkCY  
*acc genotypes* 262  
*peaks no back* 64  
*removed edges* NA  
*prop rem edges* NA

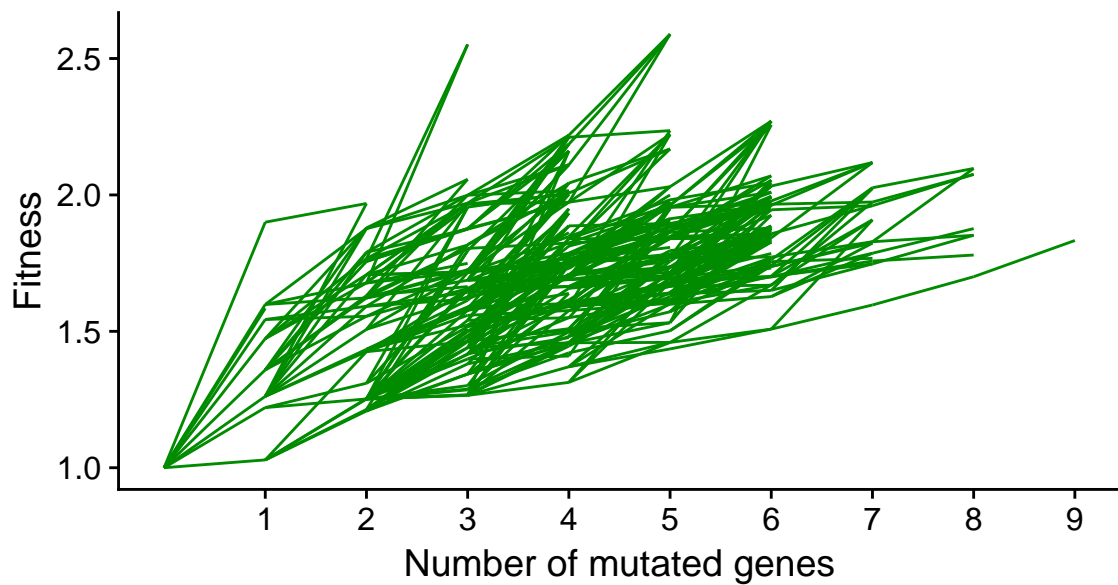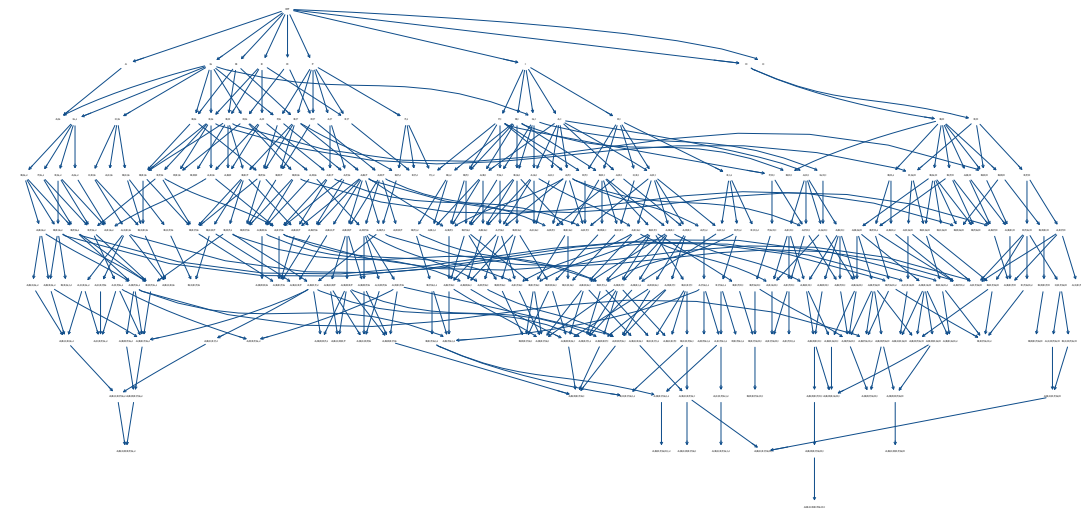

*ID* ERn91KUoSwG1g1w9  
*acc genotypes* 263  
*peaks no back* 93  
*removed edges* NA  
*prop rem edges* NA

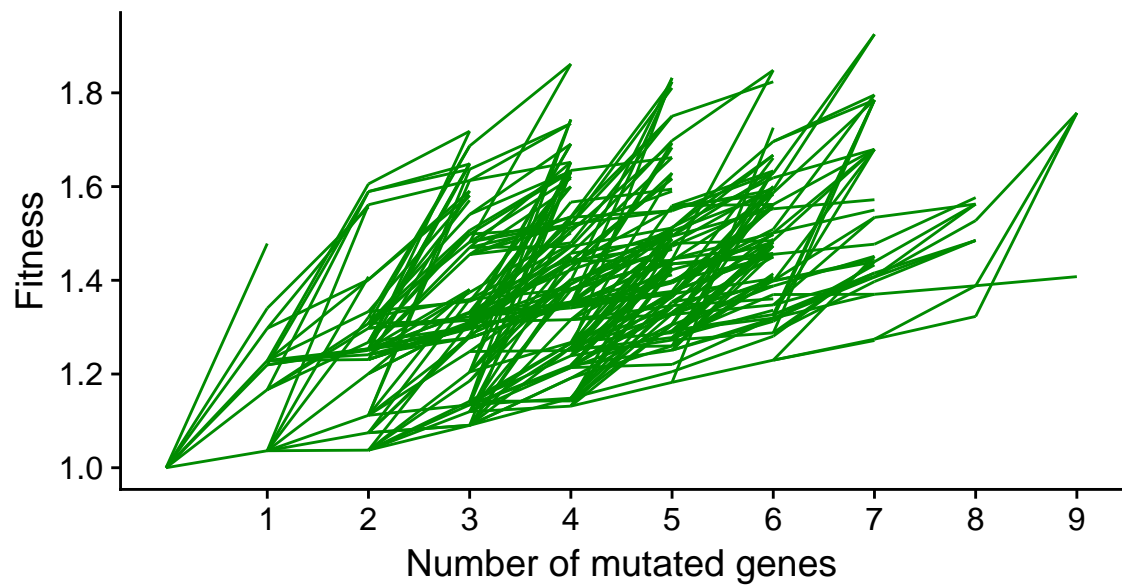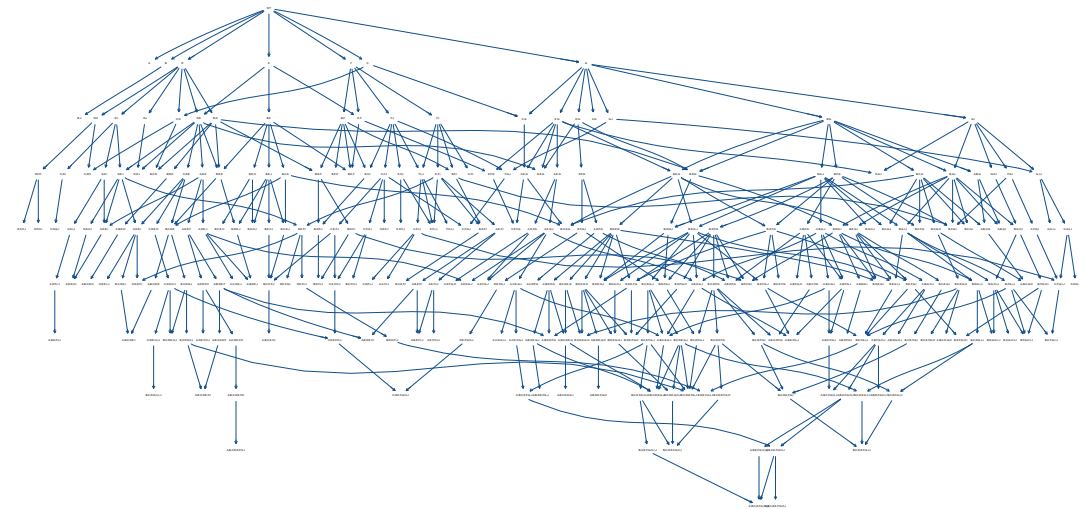

*ID* erQFJpuljZzlgwp  
*acc genotypes* 377  
*peaks no back* 75  
*removed edges* NA  
*prop rem edges* NA

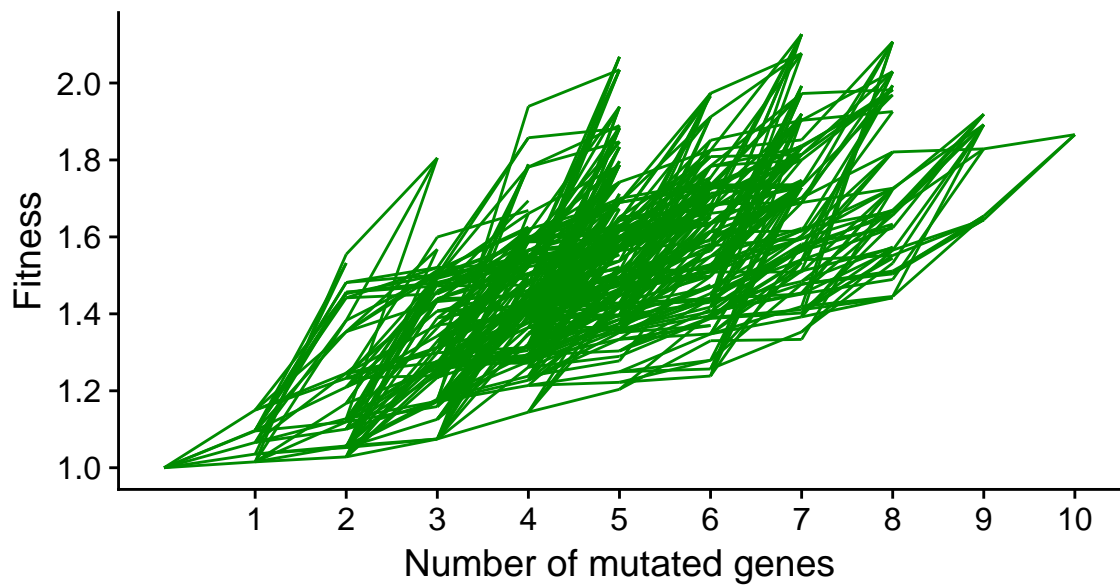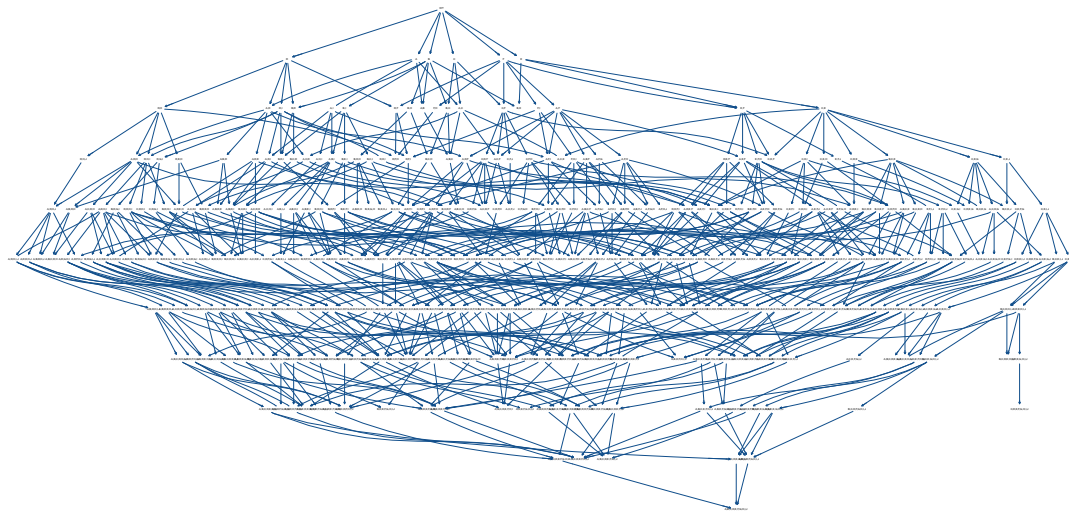

ID EV5PzPVJ8yEpuh5C  
 acc genotypes 33  
 peaks no back 13  
 removed edges NA  
 prop rem edges NA

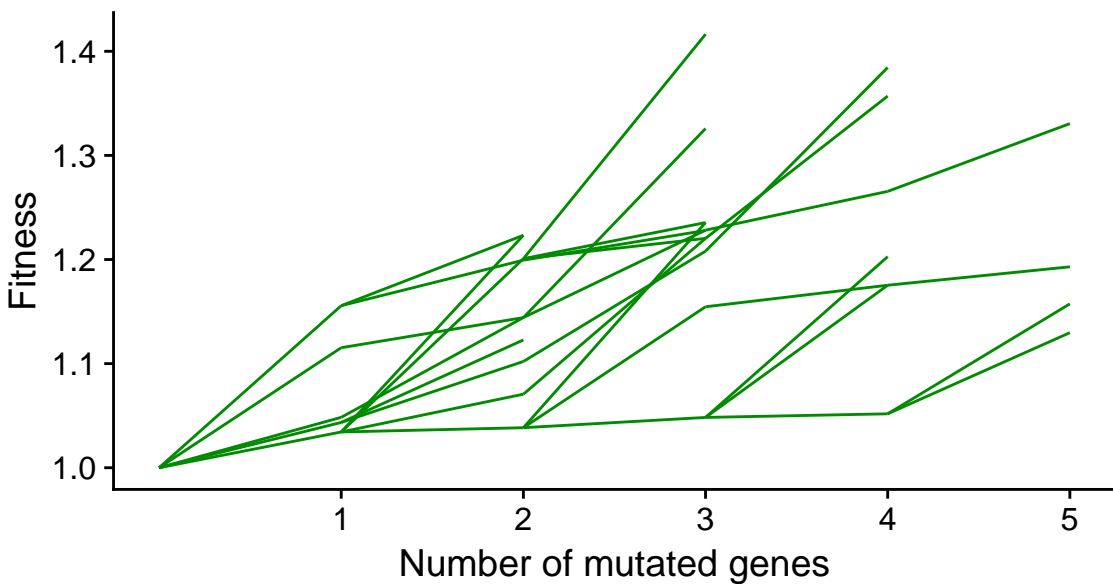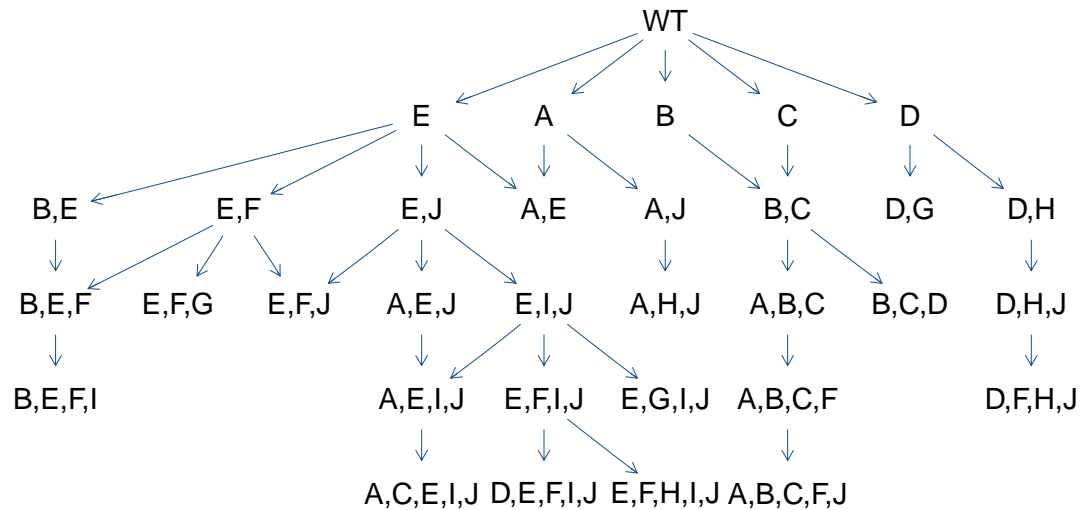

*ID* f4IIMrTiuCuX6MS  
*acc genotypes* 540  
*peaks no back* 122  
*removed edges* NA  
*prop rem edges* NA

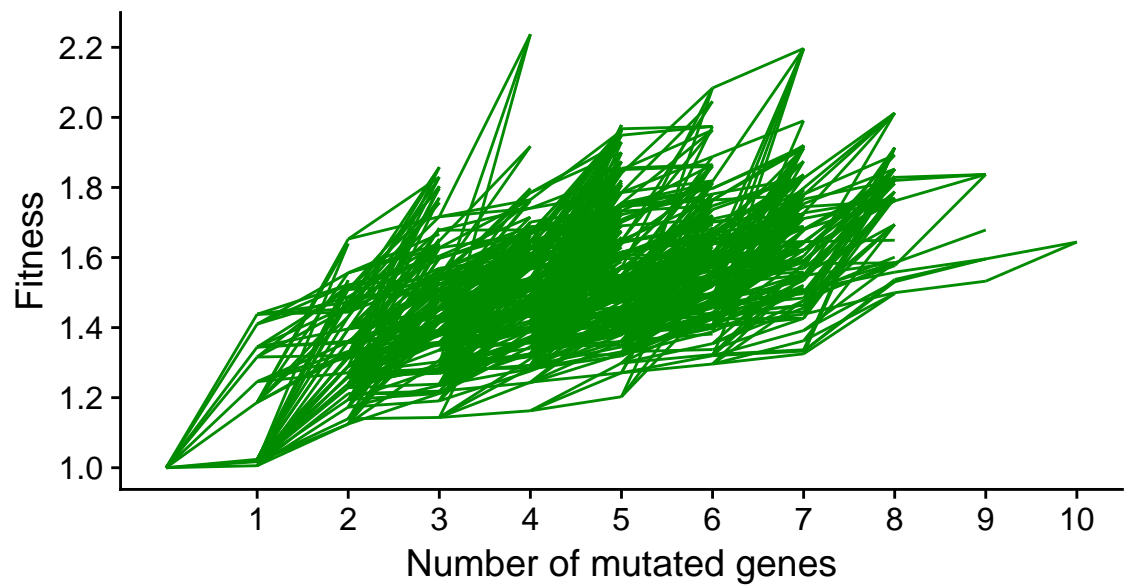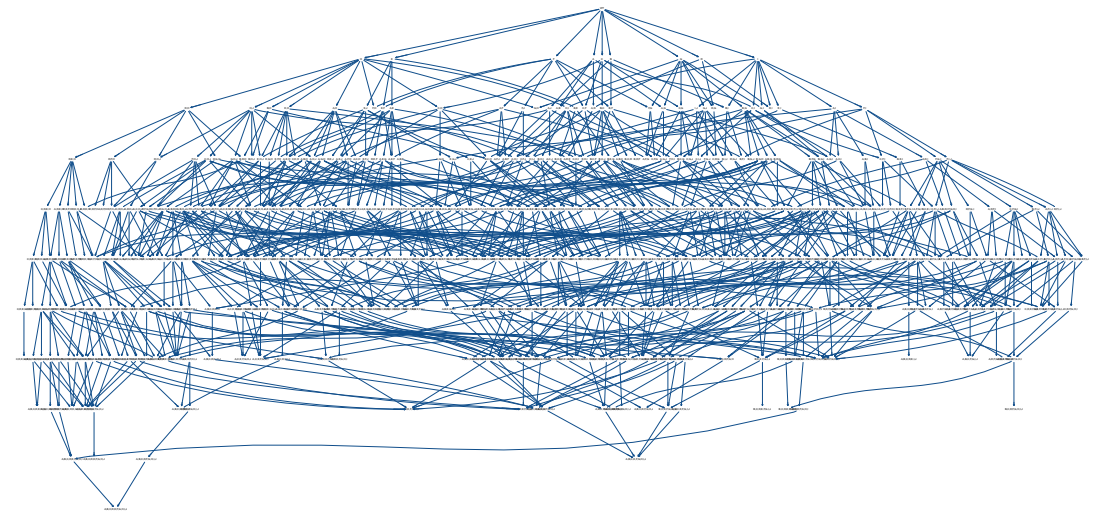



*ID* FCcL7VfUNU6lgd6e  
*acc genotypes* 400  
*peaks no back* 62  
*removed edges* NA  
*prop rem edges* NA

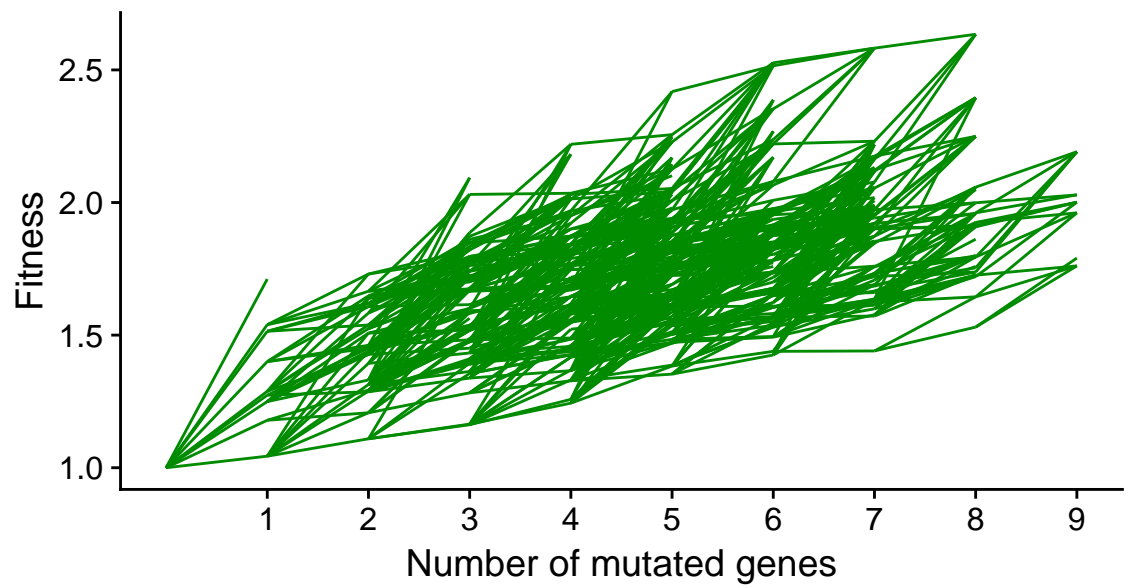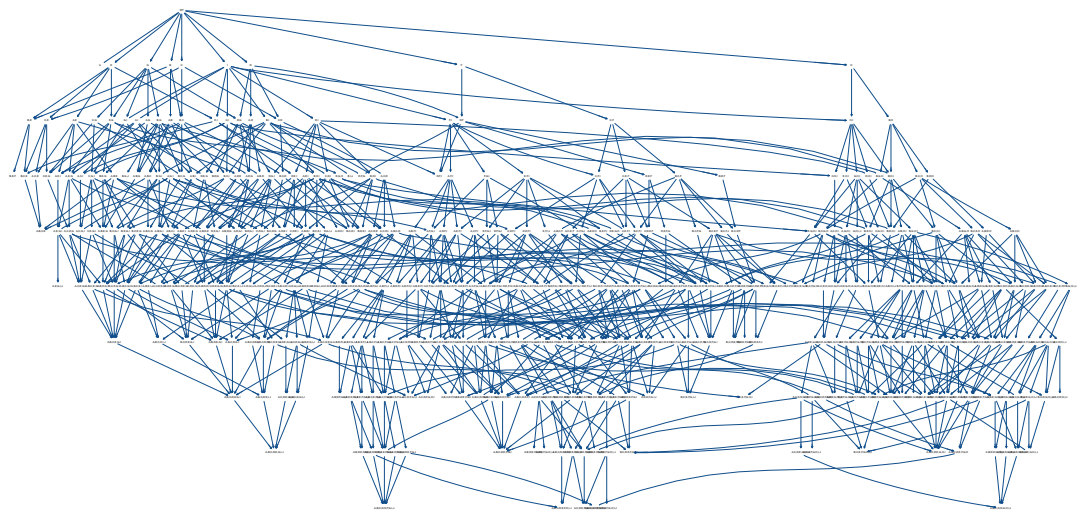

*ID* fhP10WIHL7710GBMFE  
*acc genotypes* 412  
*peaks no back* 90  
*removed edges* NA  
*prop rem edges* NA

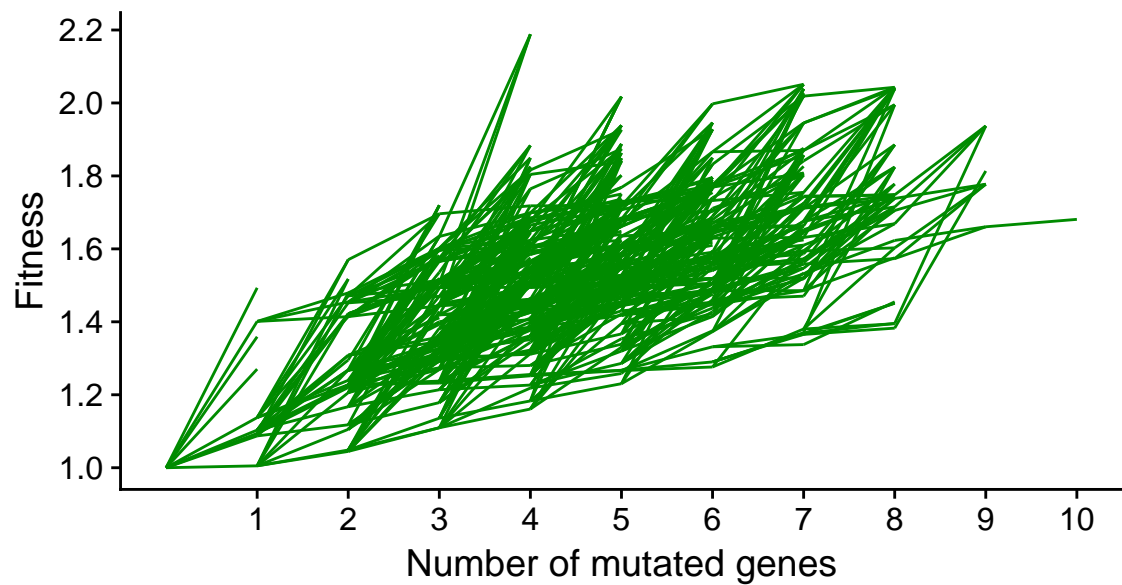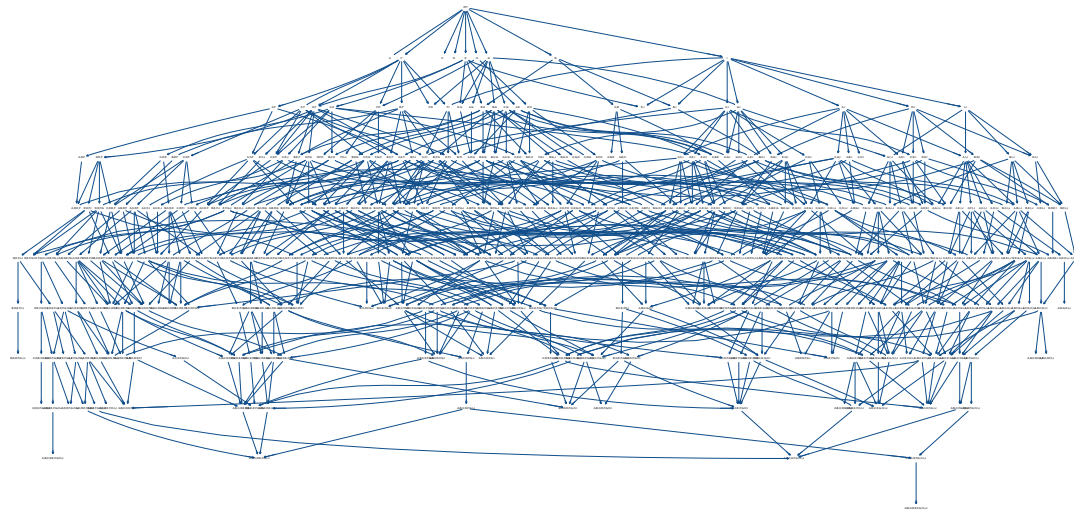

*ID* **fil7P19LmiLt1csg**  
*acc genotypes* **338**  
*peaks no back* 63  
*removed edges* NA  
*prop rem edges* NA

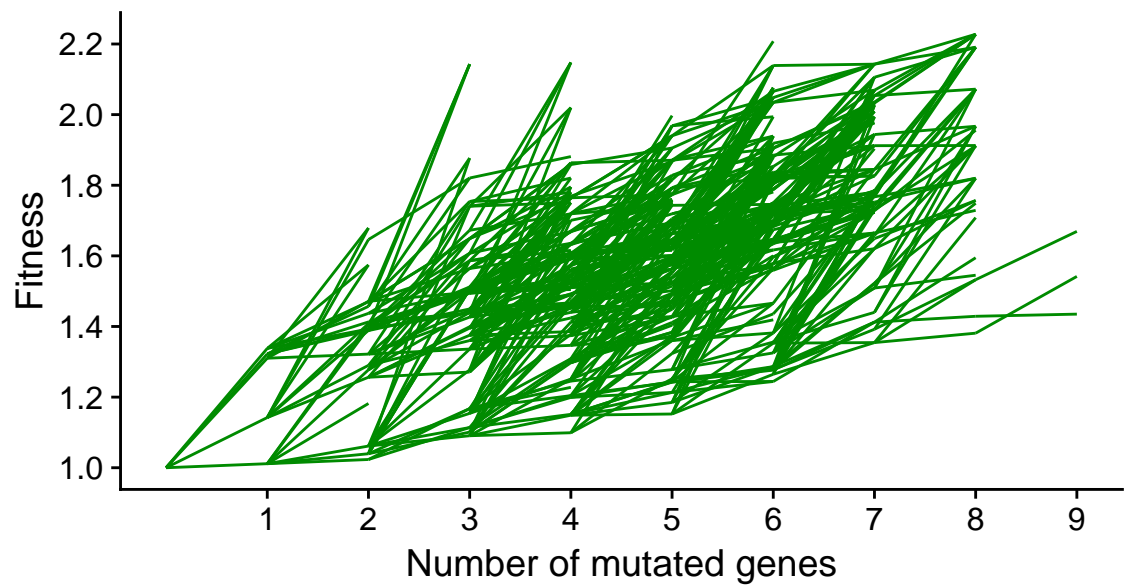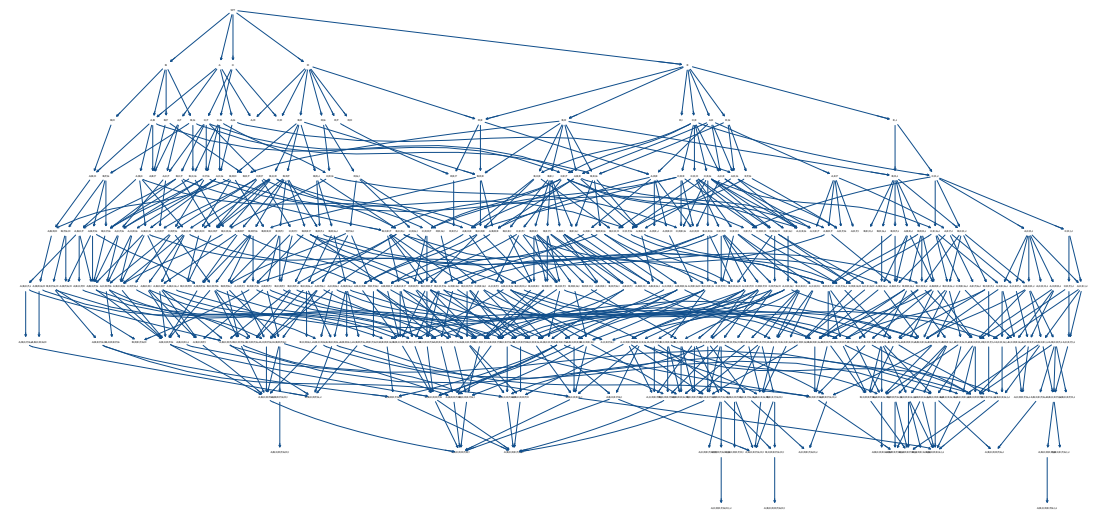

*ID* FJPvUaTzze1FXsAz  
*acc genotypes* 459  
*peaks no back* 81  
*removed edges* NA  
*prop rem edges* NA

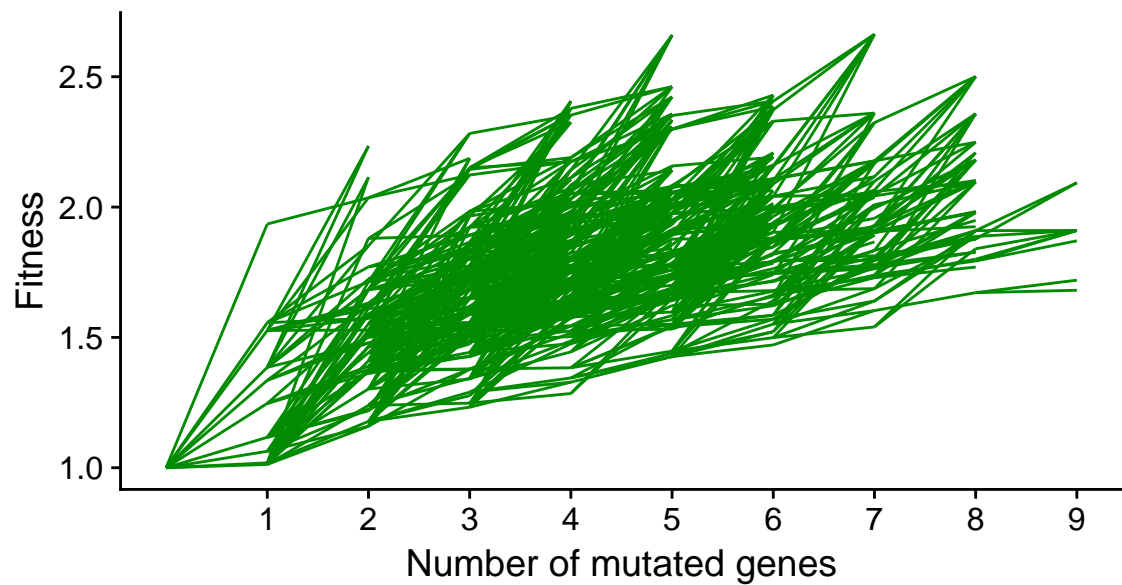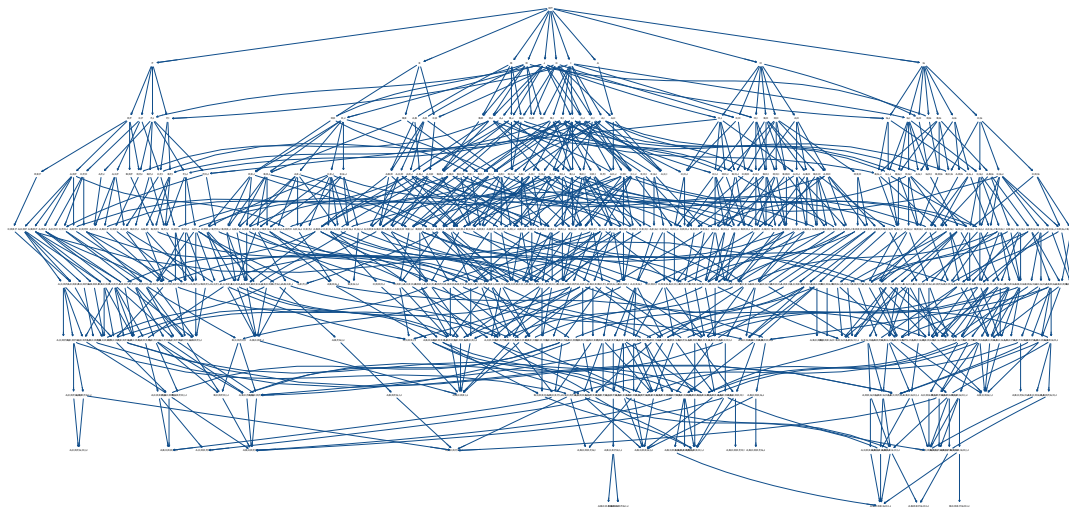

*ID* fpSFxSYrkAEuTBdj  
*acc genotypes* 355  
*peaks no back* 123  
*removed edges* NA  
*prop rem edges* NA

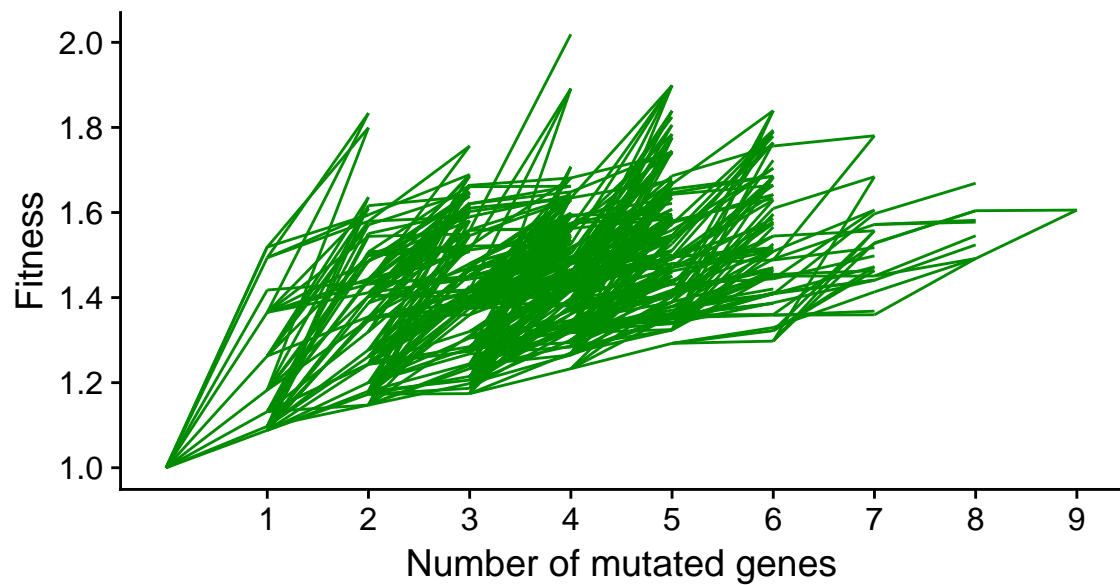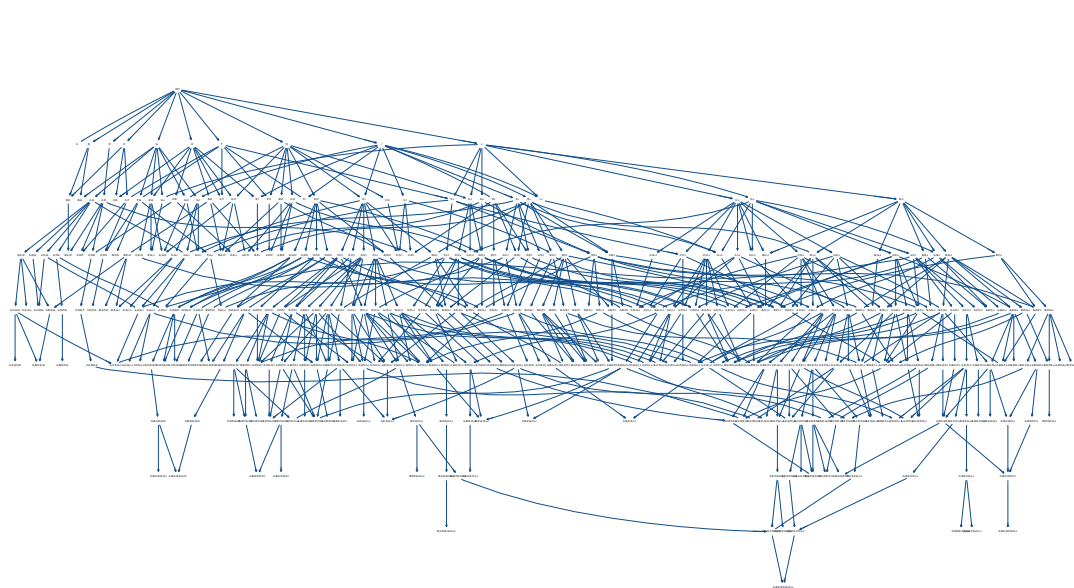

ID FSw8uHKnSnOw6Xrh  
 acc genotypes 124  
 peaks no back 32  
 removed edges NA  
 prop rem edges NA

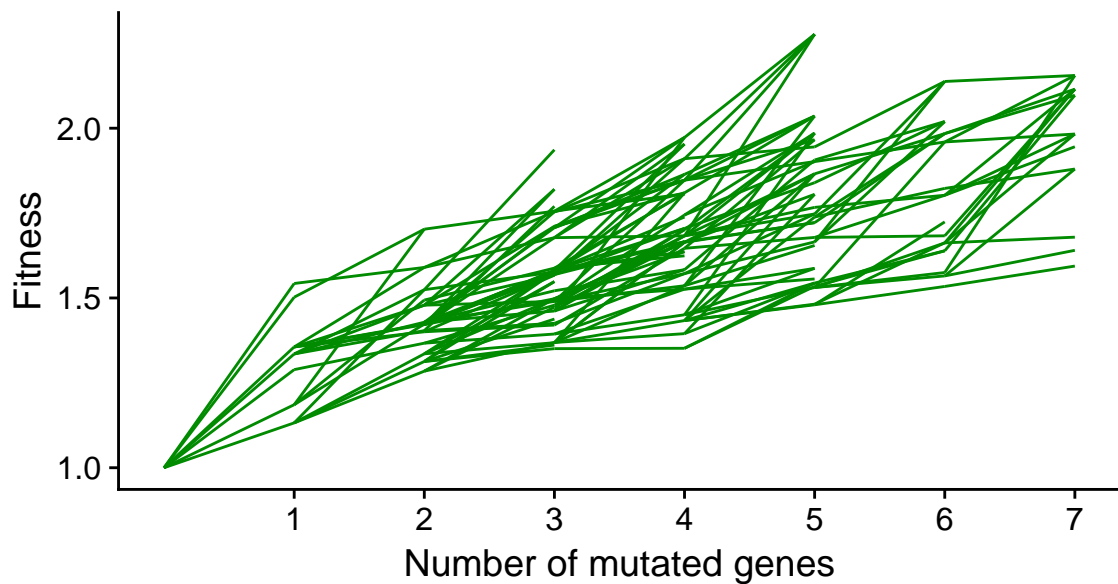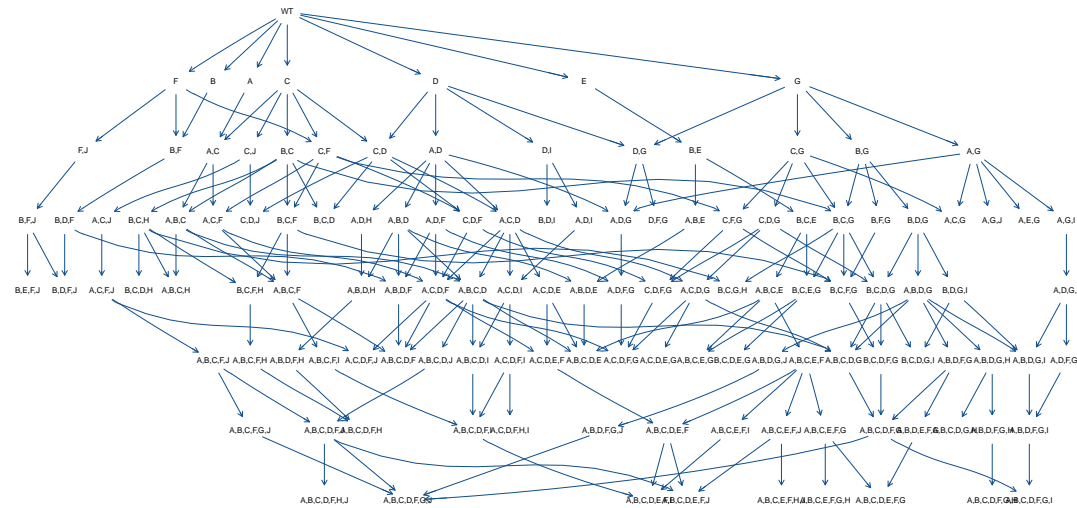

*ID* fWEJplAFKvHJAViu  
*acc genotypes* 208  
*peaks no back* 52  
*removed edges* NA  
*prop rem edges* NA

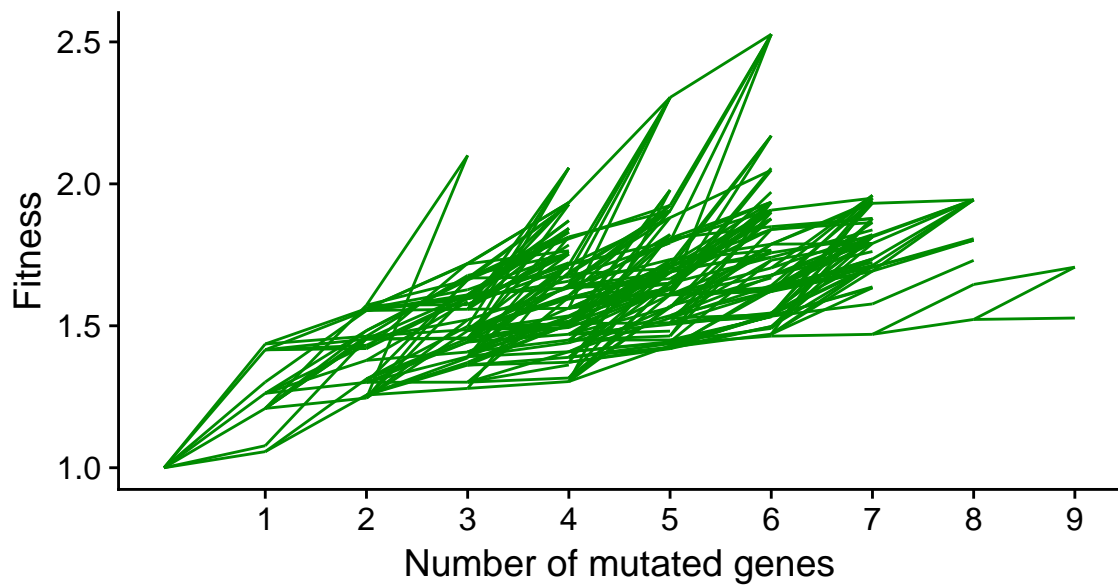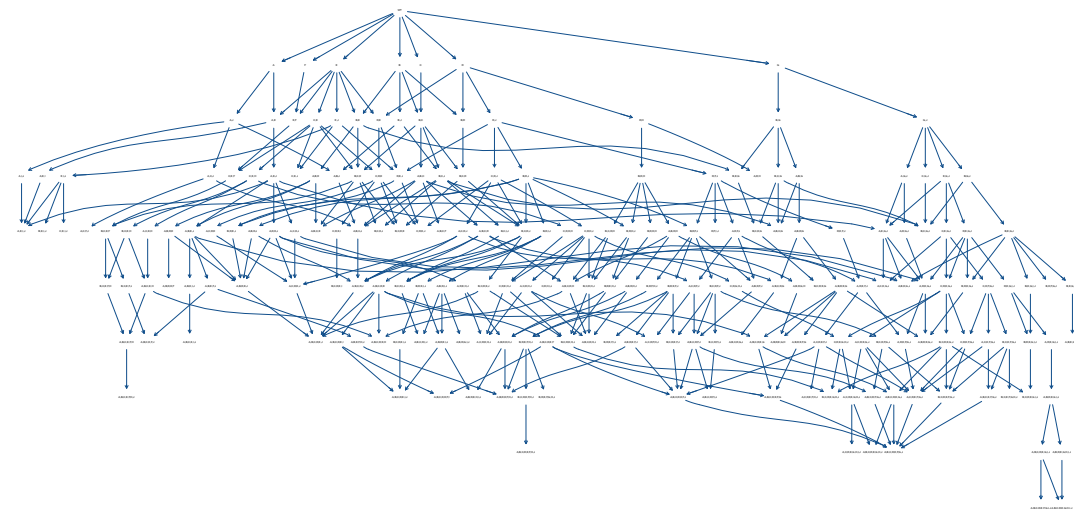

ID **g4on7kMYrN7lvT9p**  
 acc genotypes **106**  
 peaks no back **48**  
 removed edges **NA**  
 prop rem edges **NA**

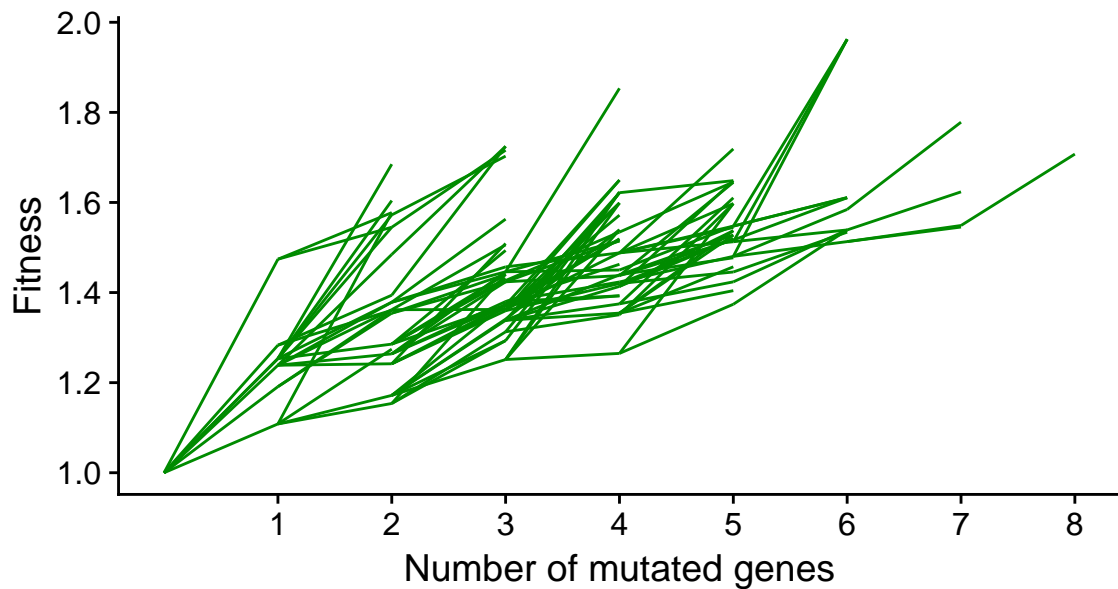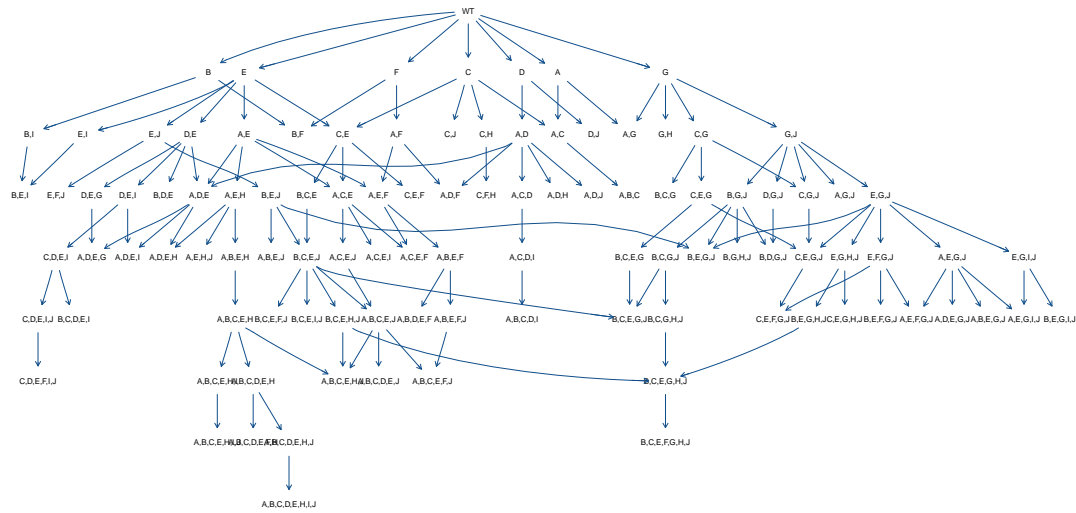



*ID* g5rN9RqrUiS9arMn  
*acc genotypes* 39  
*peaks no back* 16  
*removed edges* NA  
*prop rem edges* NA

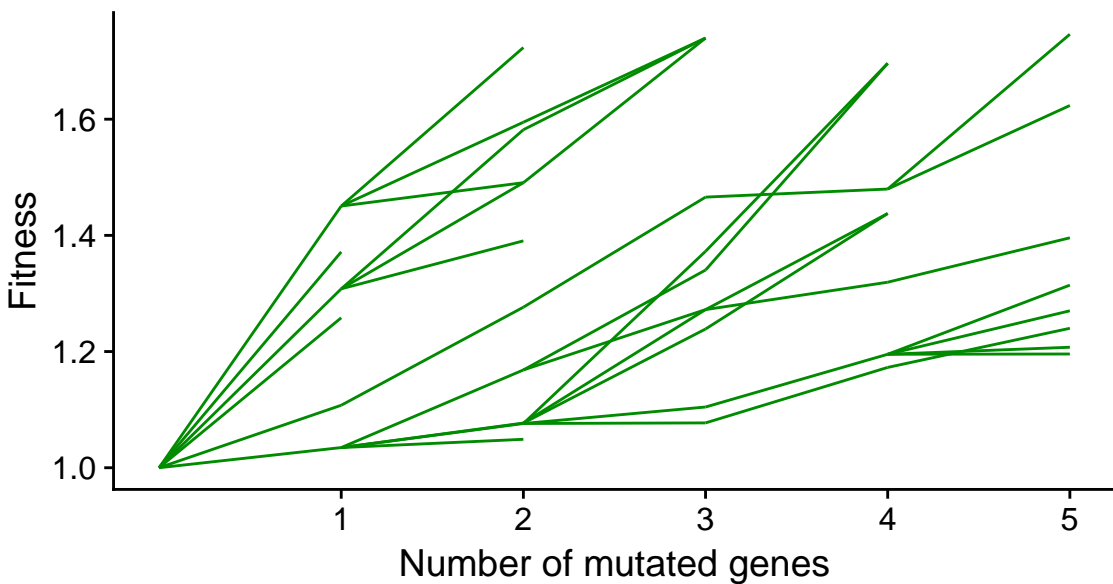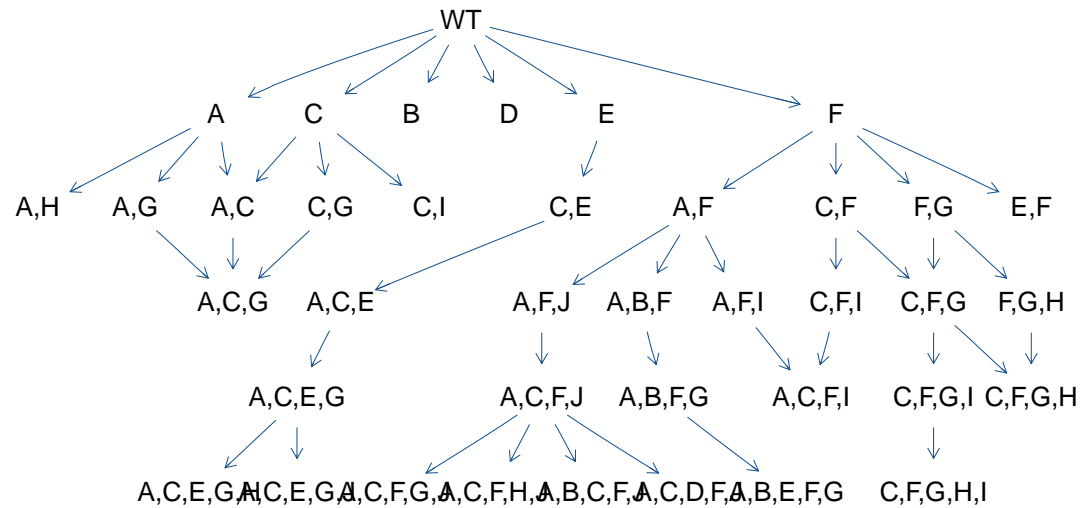

*ID* g7EPSPvUEgZmblyv  
*acc genotypes* 282  
*peaks no back* 69  
*removed edges* NA  
*prop rem edges* NA

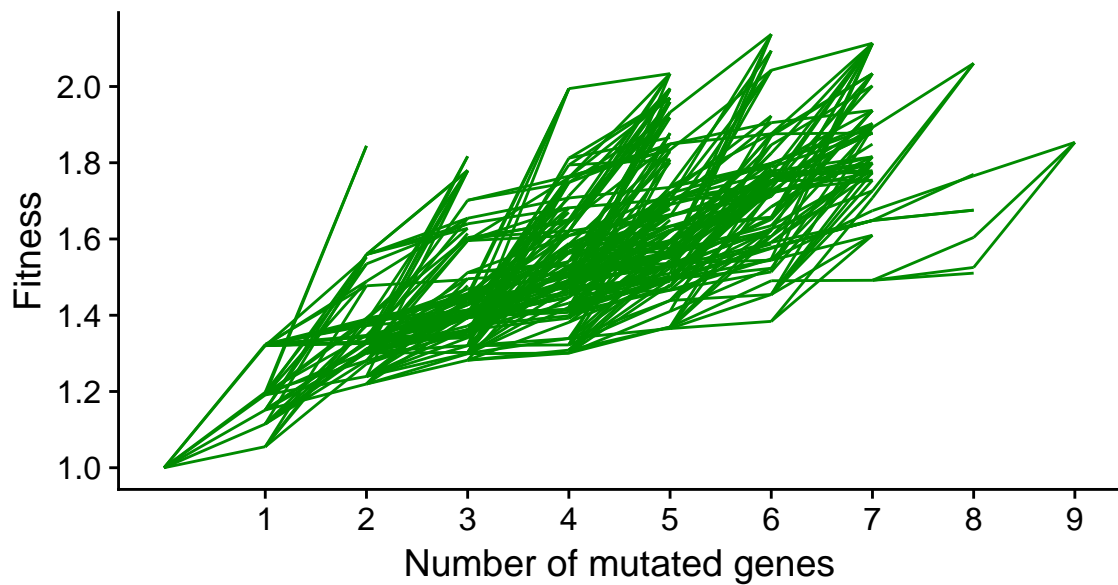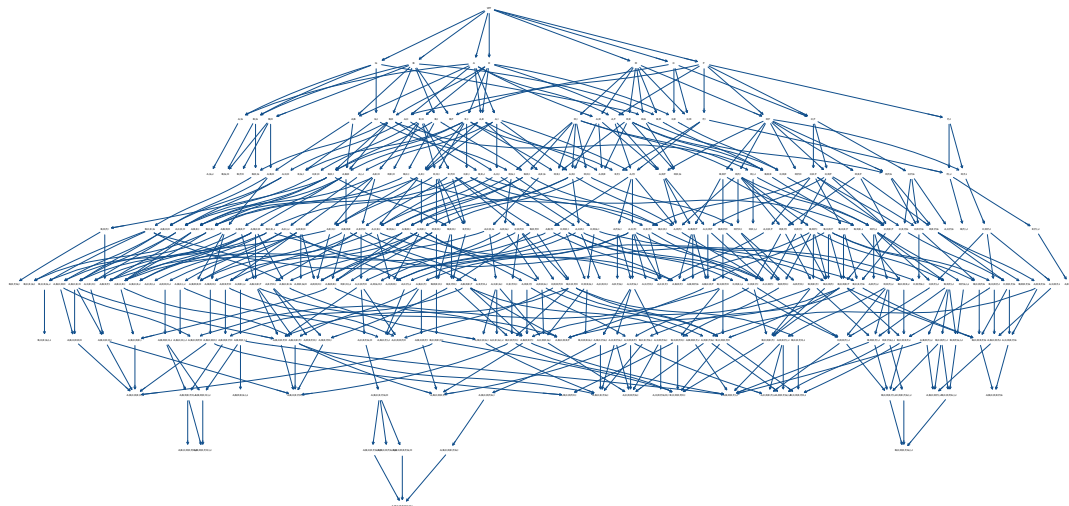

ID GDPPhLnRCnDMjG2D7  
 acc genotypes 185  
 peaks no back 64  
 removed edges NA  
 prop rem edges NA

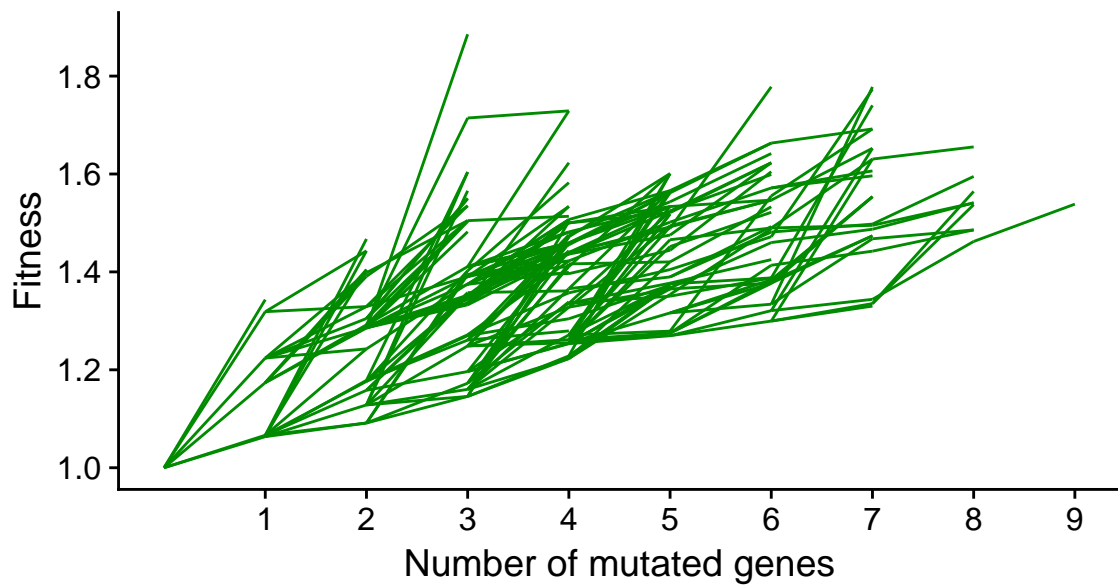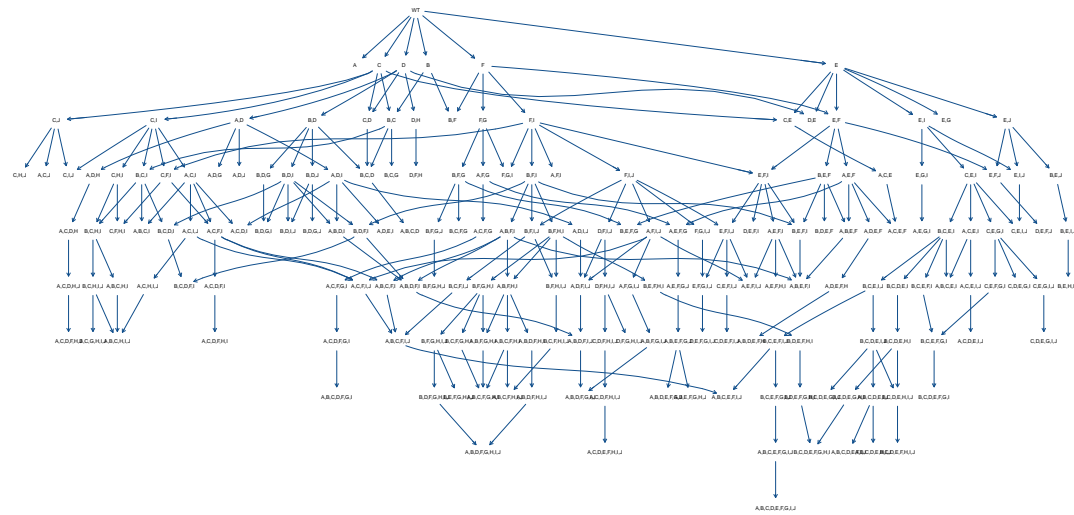

*ID* Ggye5iq3jqoH3lvU  
*acc genotypes* 314  
*peaks no back* 112  
*removed edges* NA  
*prop rem edges* NA

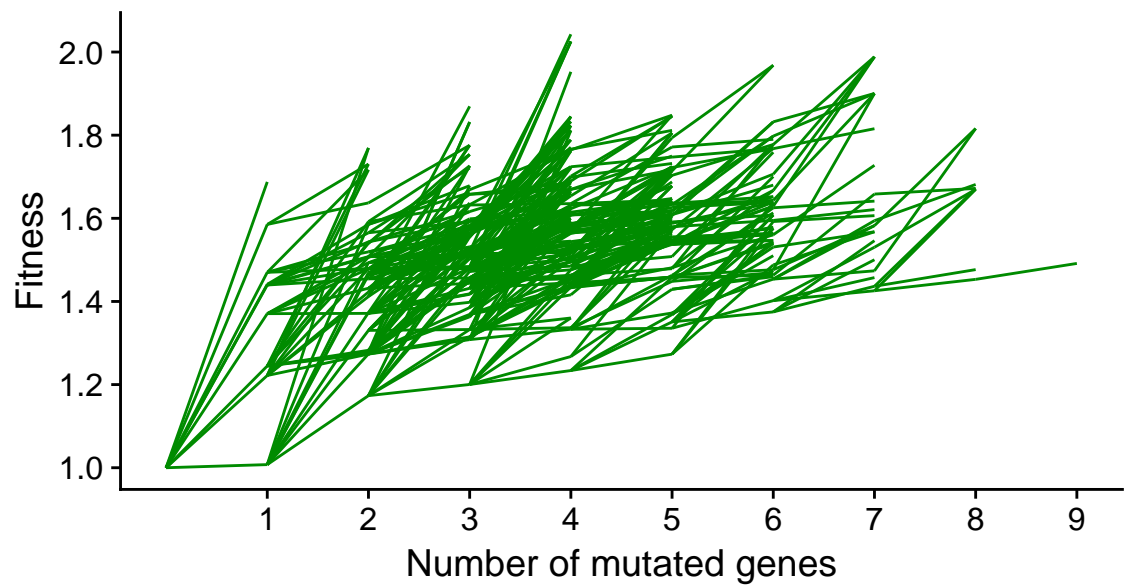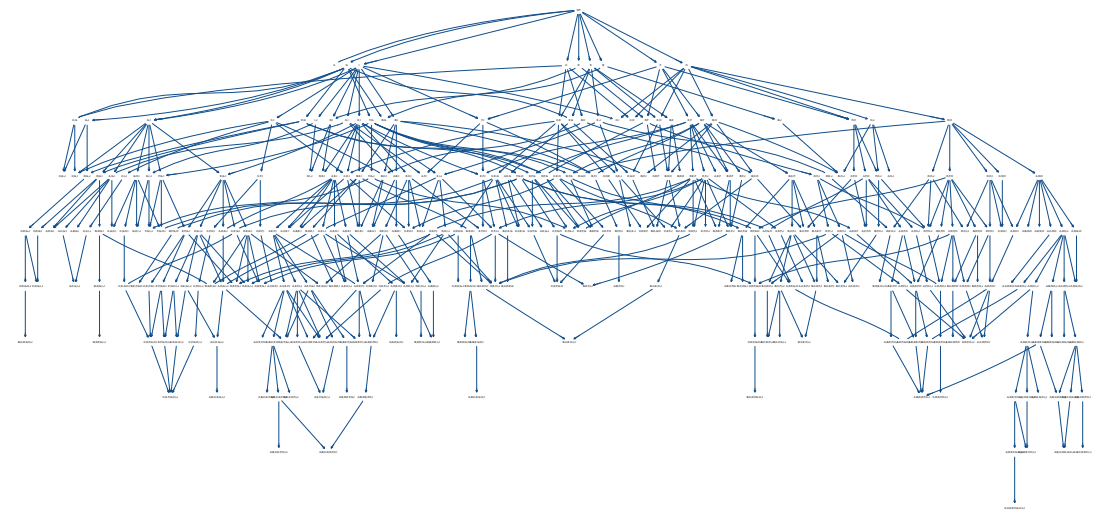

ID gQ91ynxxLJpJfC10R  
 acc genotypes 53  
 peaks no back 23  
 removed edges NA  
 prop rem edges NA

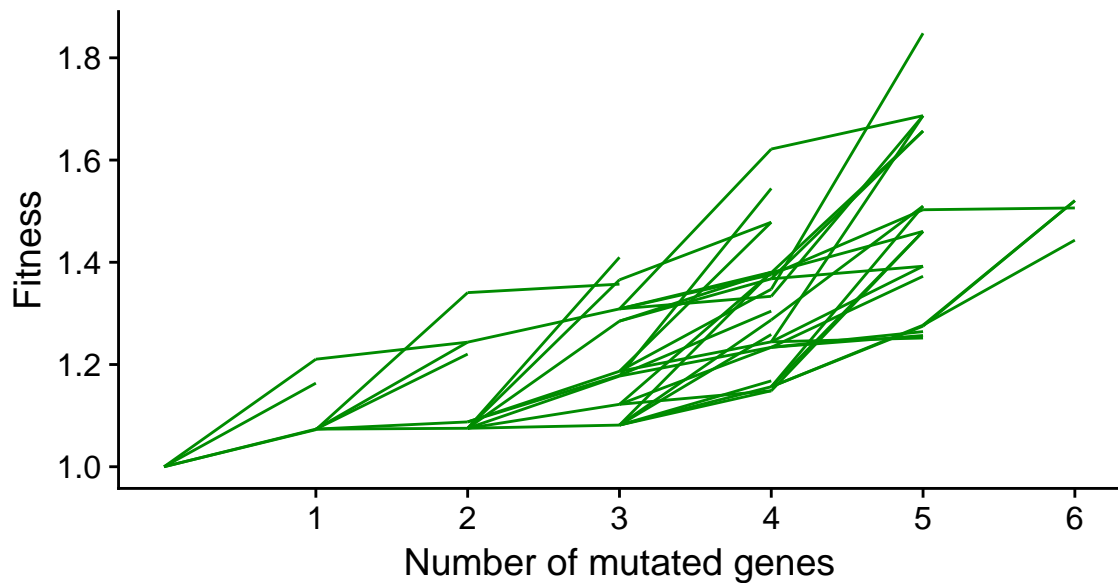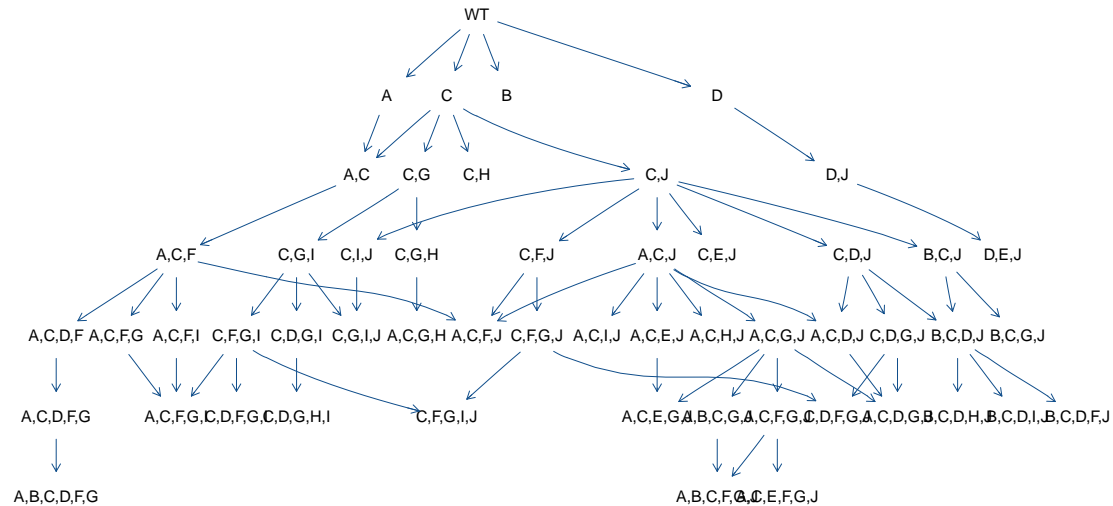

ID GtsX2ANXEuqX4ryX  
 acc genotypes 48  
 peaks no back 21  
 removed edges NA  
 prop rem edges NA

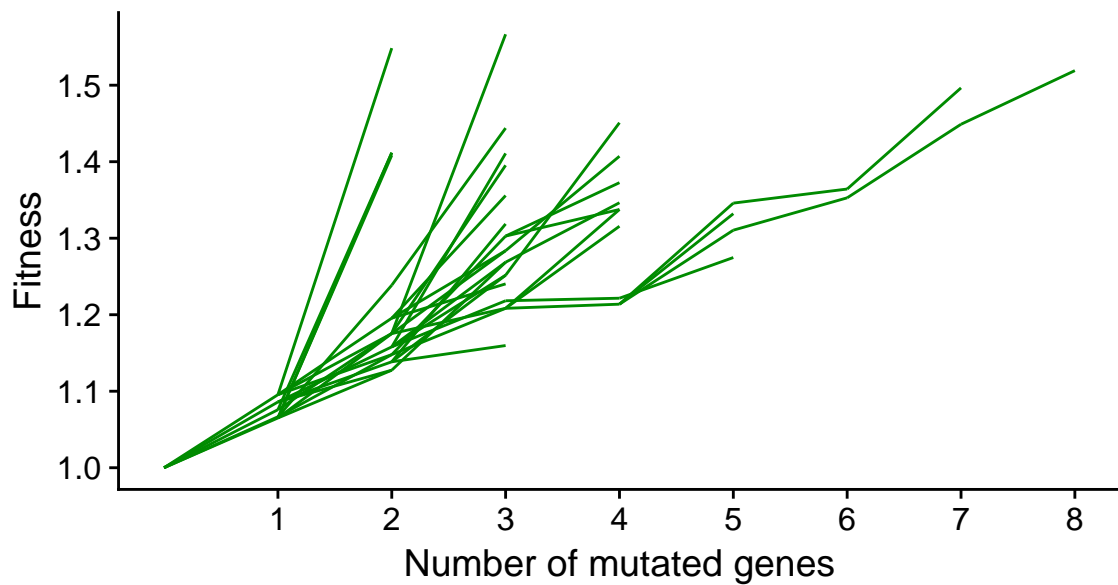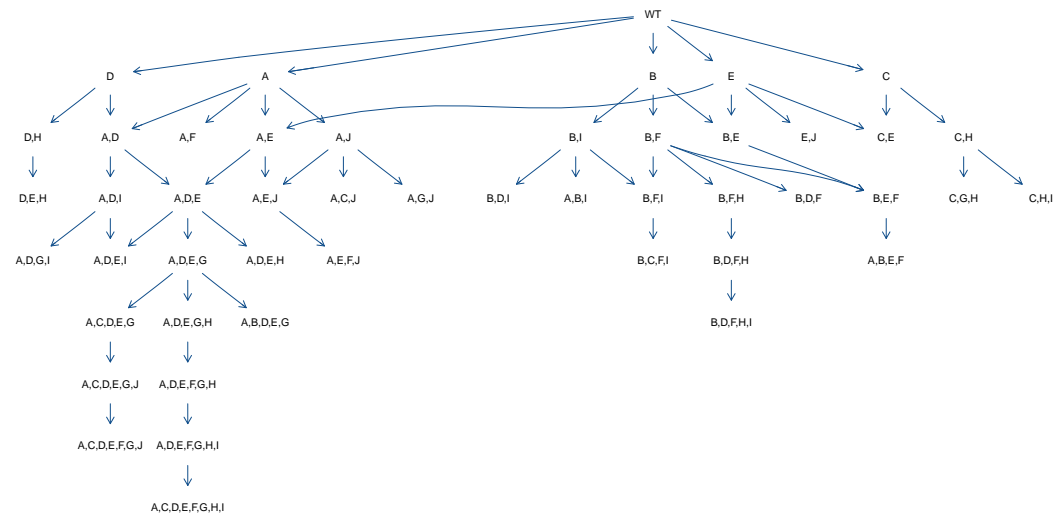

ID **gU6jF3rPQlacxvDT**  
 acc genotypes **198**  
 peaks no back **76**  
 removed edges **NA**  
 prop rem edges **NA**

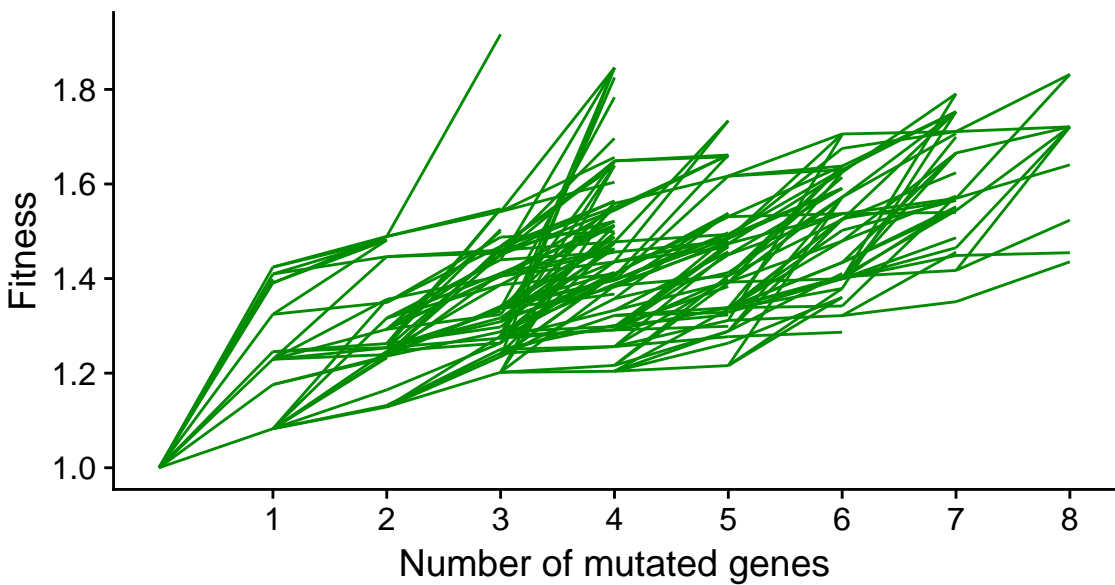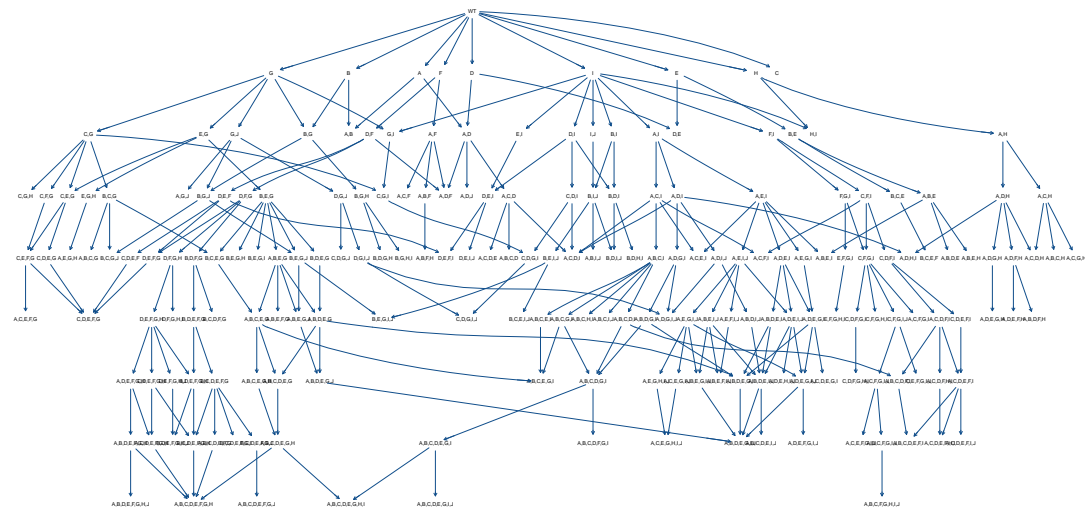

*ID* h10Ra4qDED5CSQYcN  
*acc genotypes* 472  
*peaks no back* 79  
*removed edges* NA  
*prop rem edges* NA

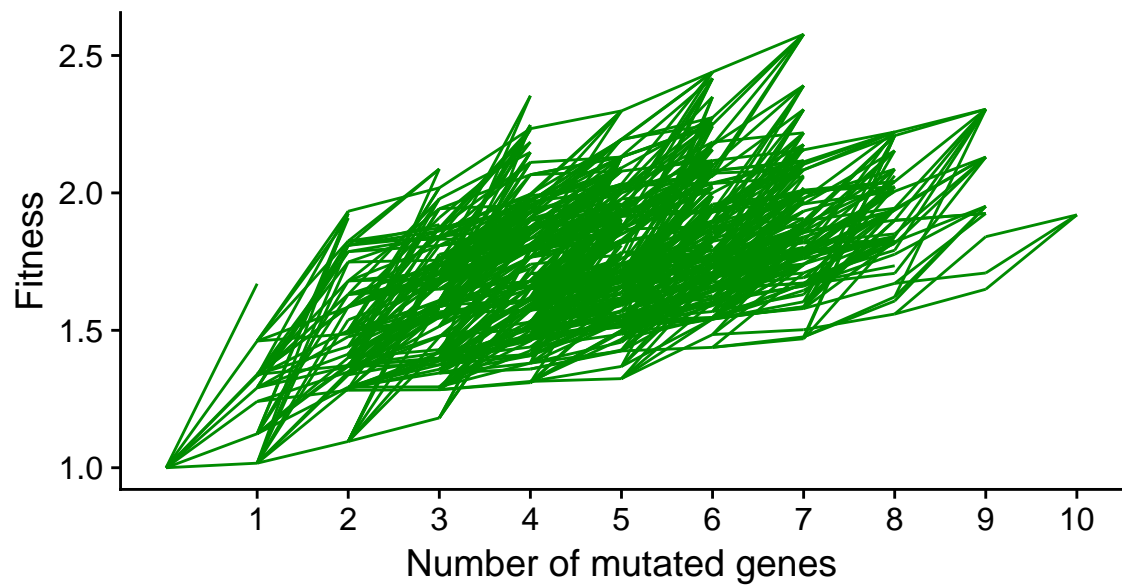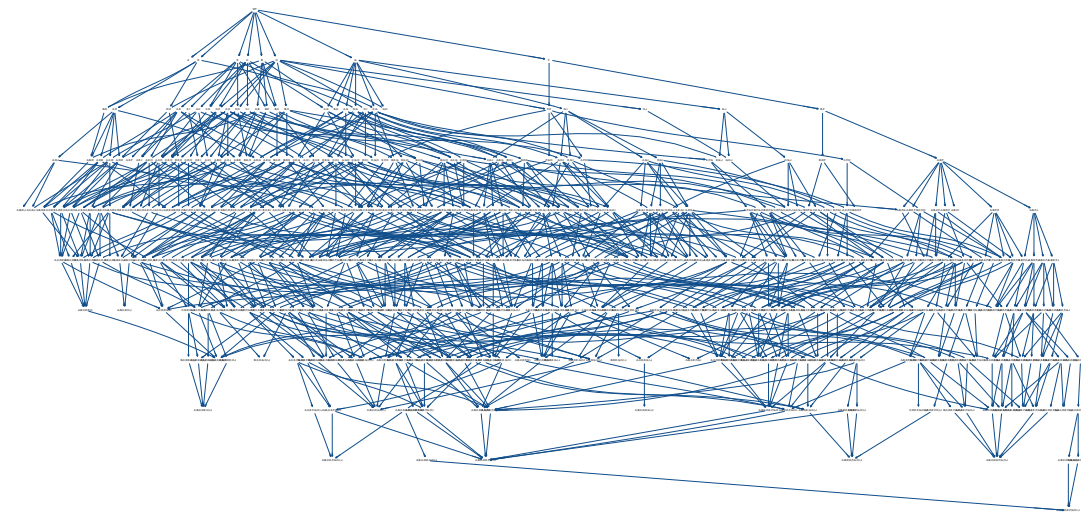



ID H5F3U9TPZOWztRjG  
acc genotypes 501  
peaks no back 101  
removed edges NA  
prop rem edges NA

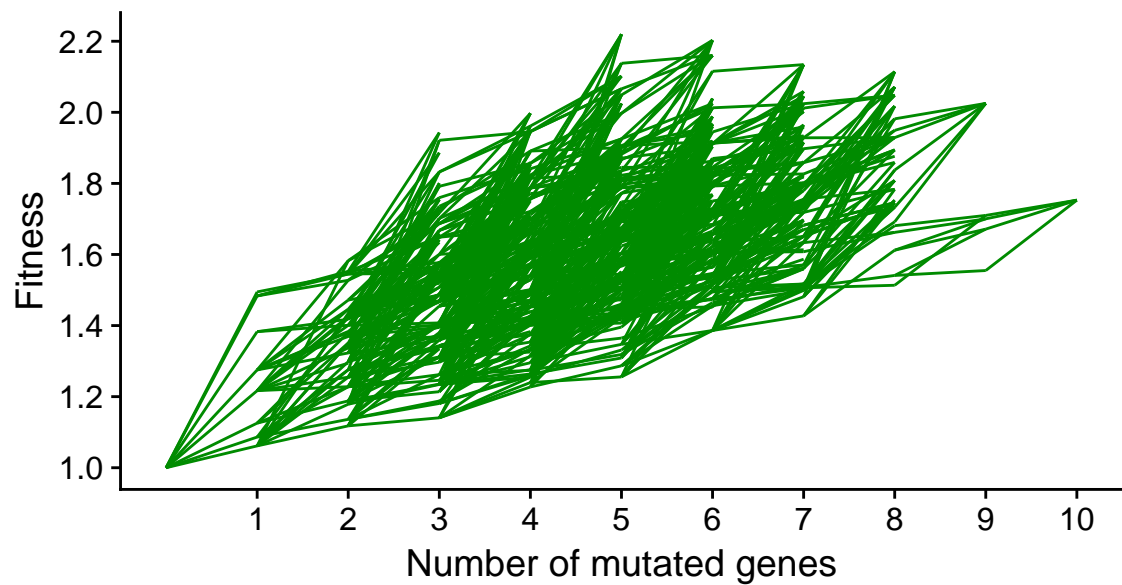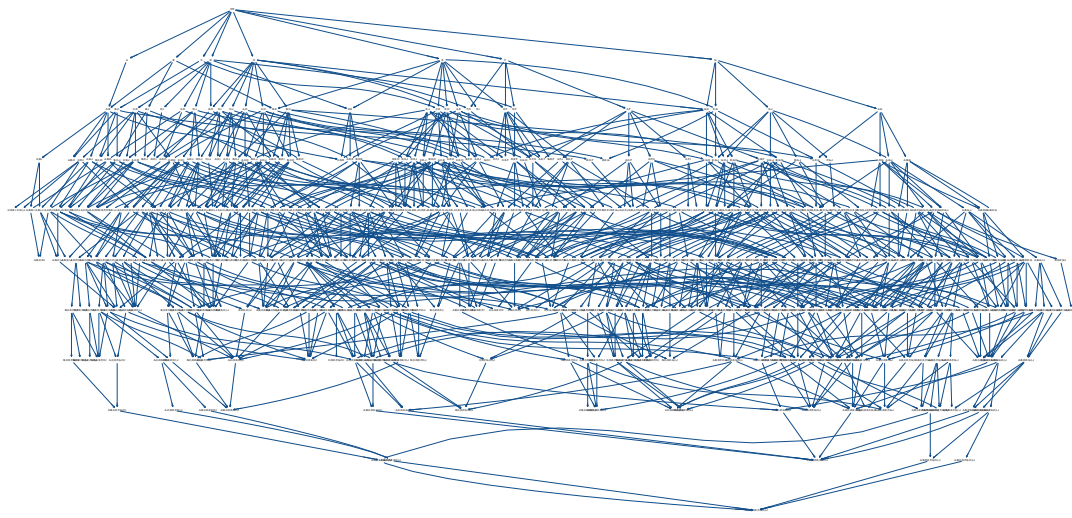

*ID* HdswhOaHWIP1kOLZ  
*acc genotypes* 389  
*peaks no back* 95  
*removed edges* NA  
*prop rem edges* NA

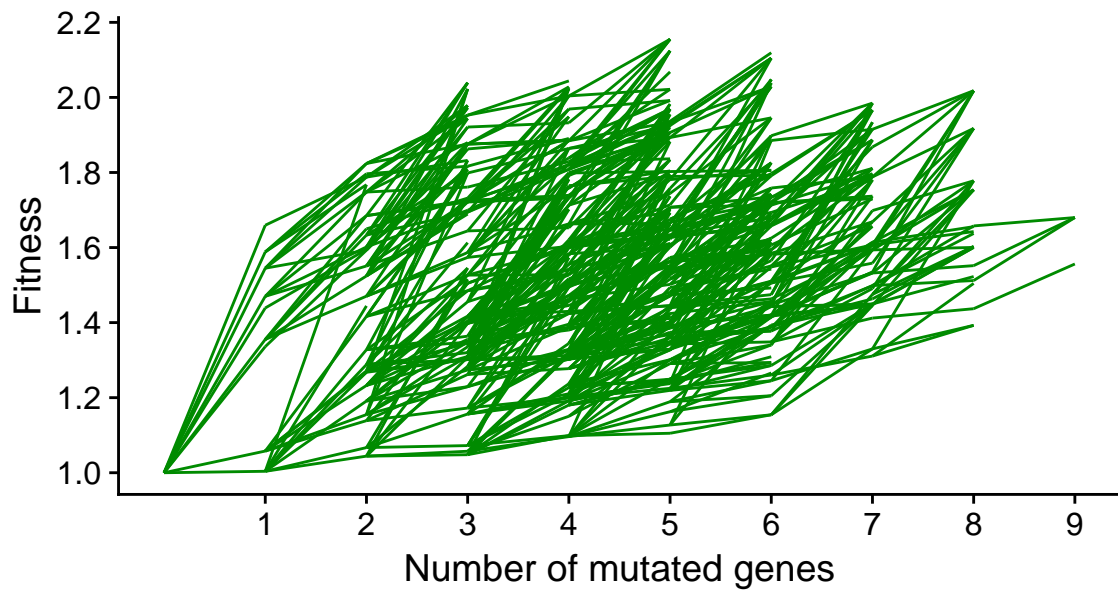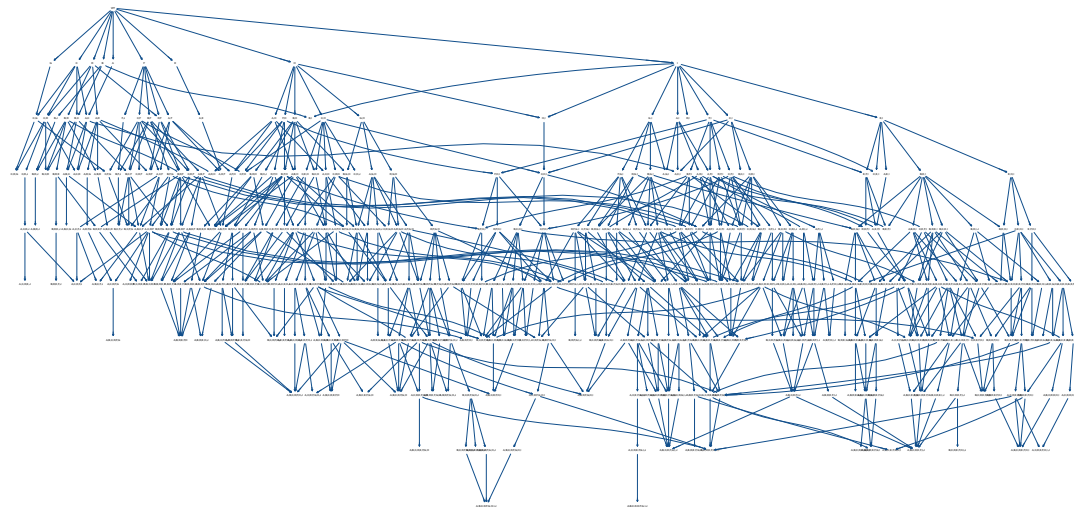

*ID* helHa8Gt8XkXkA6v  
*acc genotypes* 19  
*peaks no back* 8  
*removed edges* NA  
*prop rem edges* NA

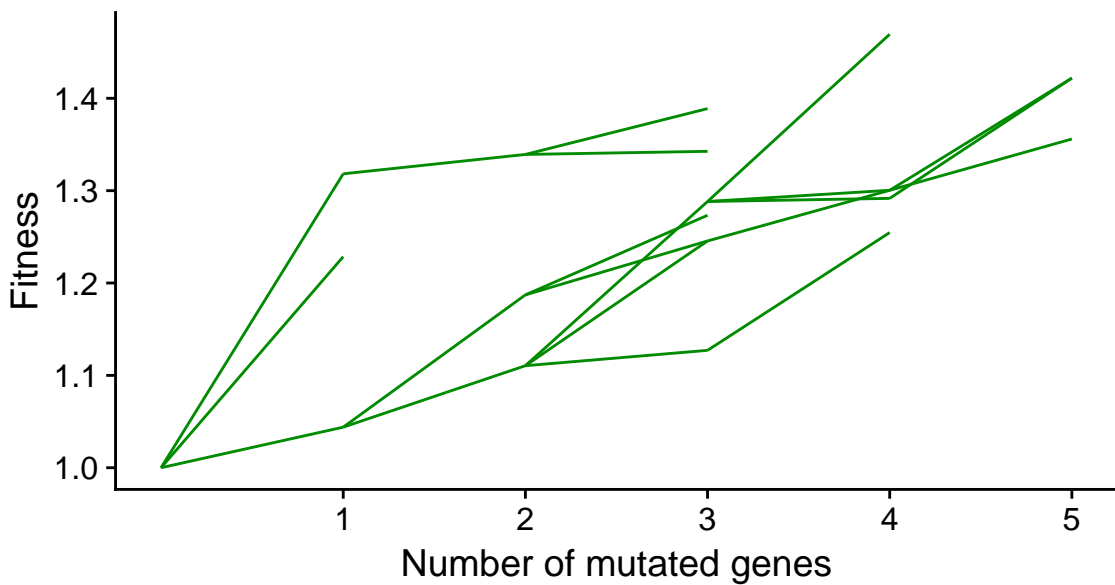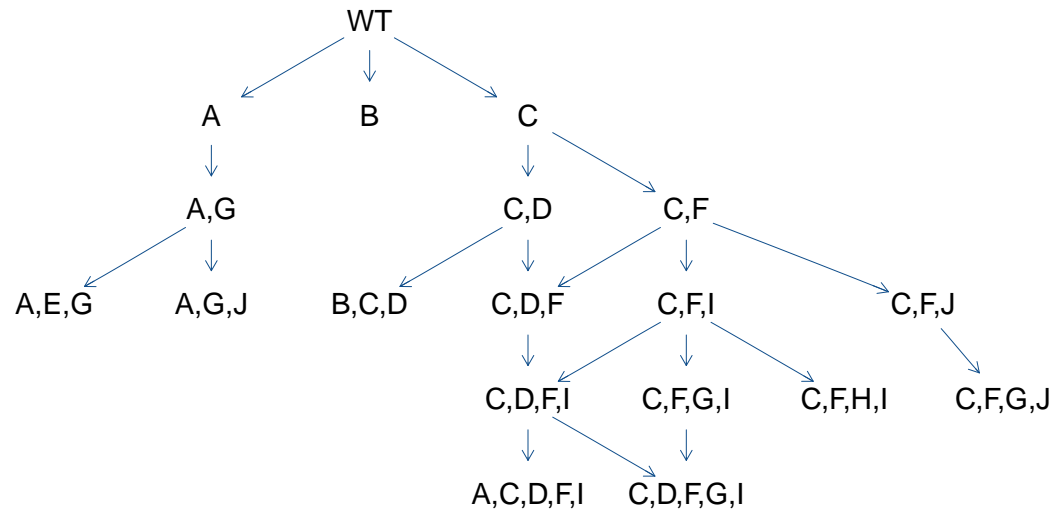

*ID* hm10KP8sr2CYeQUji  
*acc genotypes* 309  
*peaks no back* 107  
*removed edges* NA  
*prop rem edges* NA

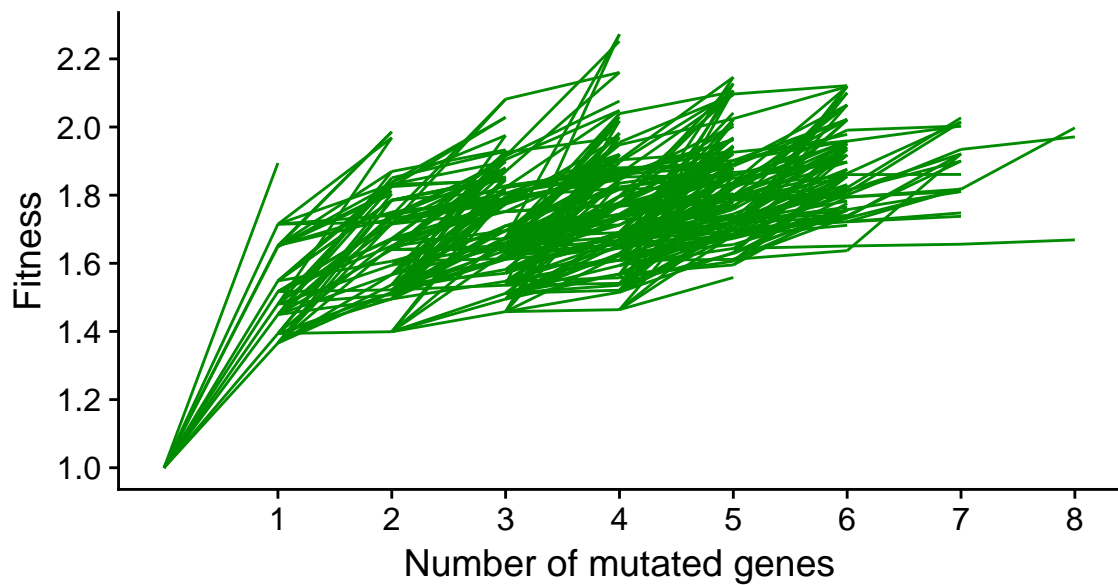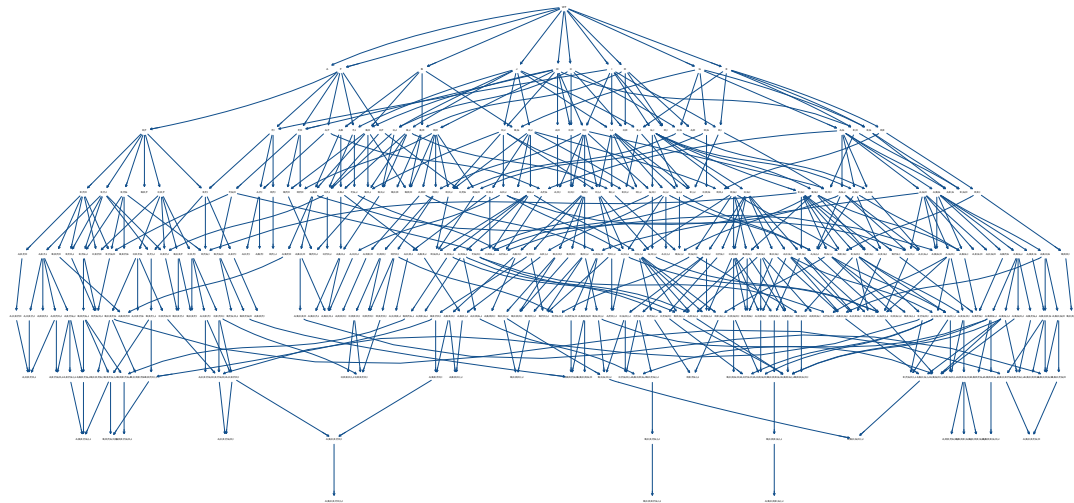

*ID* hQhSt6SyCYjTd10y8  
*acc genotypes* 593  
*peaks no back* 84  
*removed edges* NA  
*prop rem edges* NA

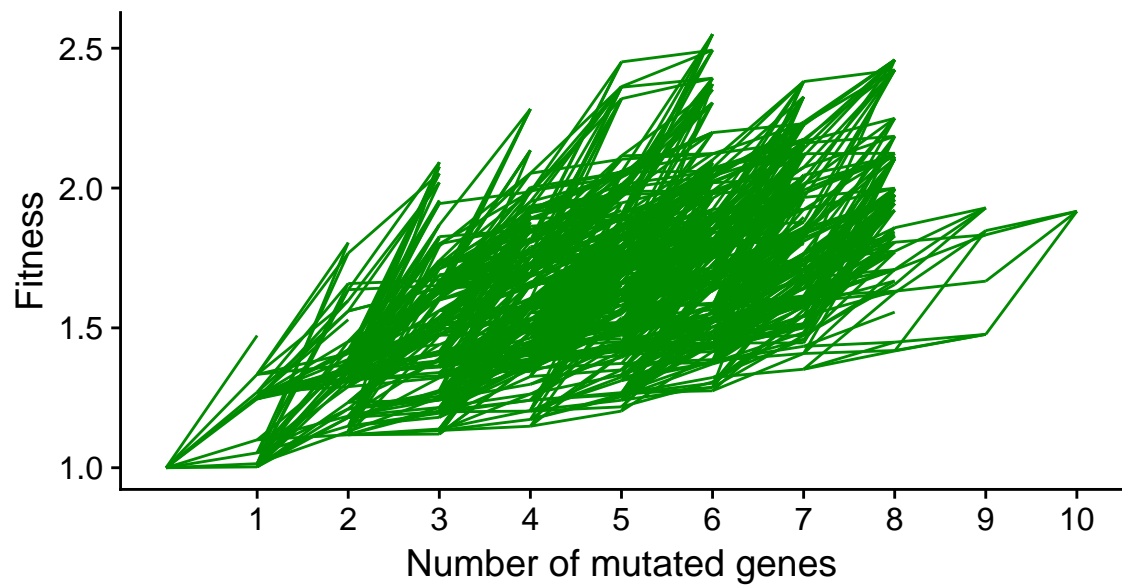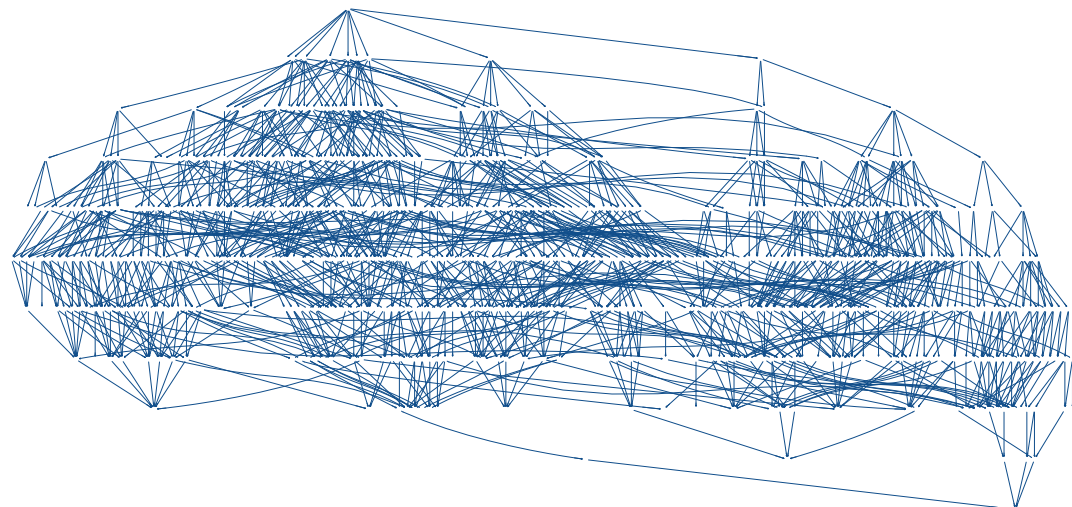

ID hrKHhSGSCA4NDMJP  
acc genotypes 157  
peaks no back 43  
removed edges NA  
prop rem edges NA

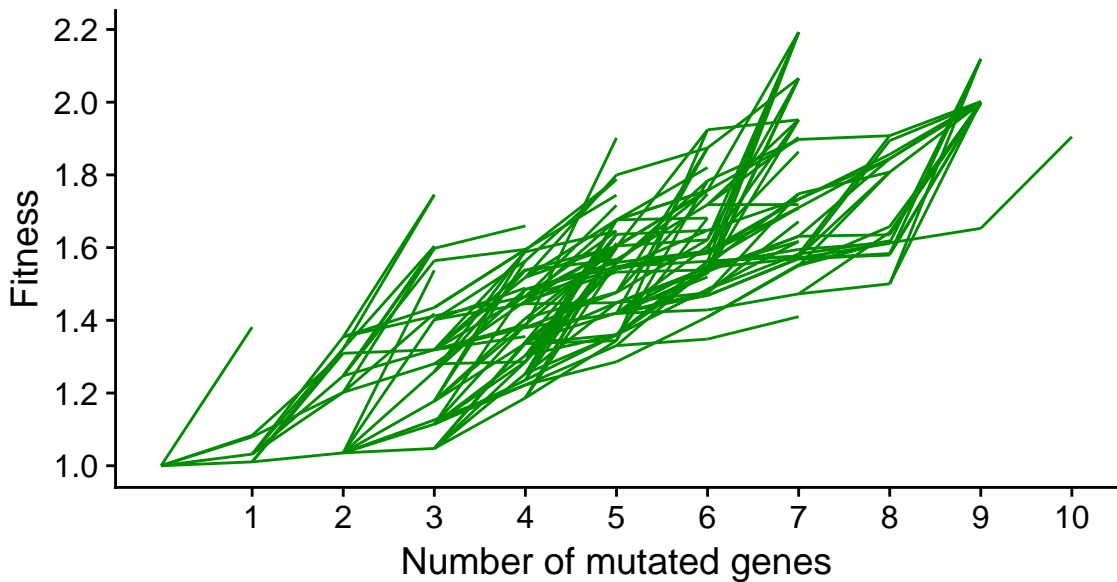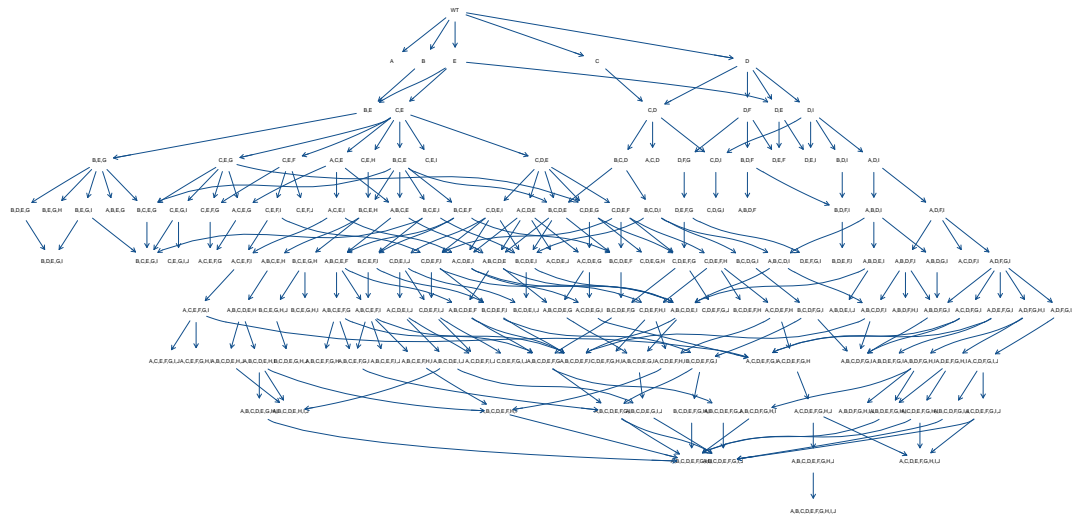

*ID* I9q6GI3hisYql2on  
*acc genotypes* 298  
*peaks no back* 79  
*removed edges* NA  
*prop rem edges* NA

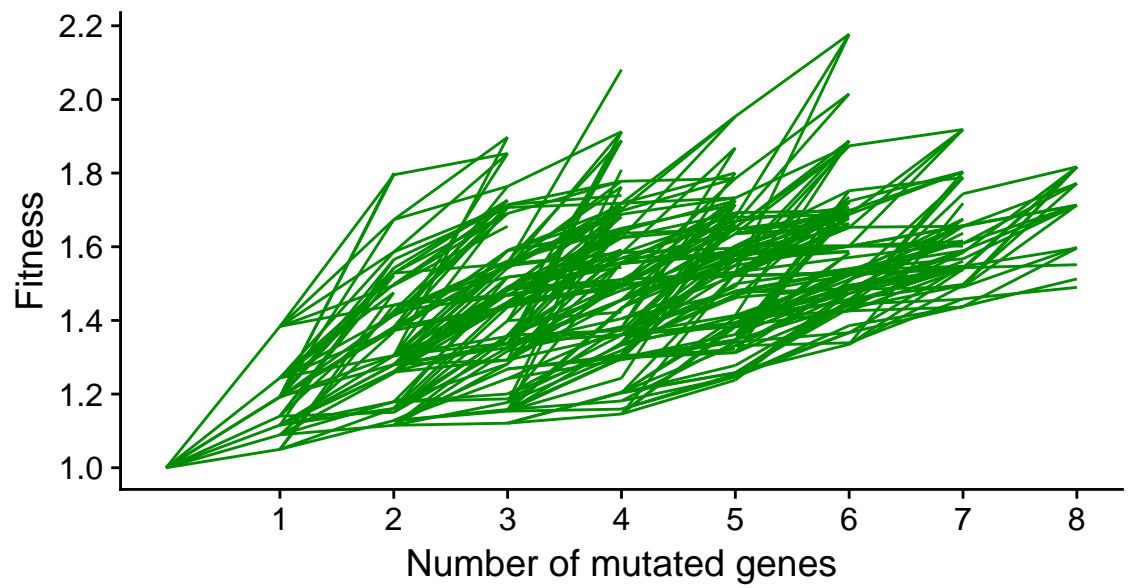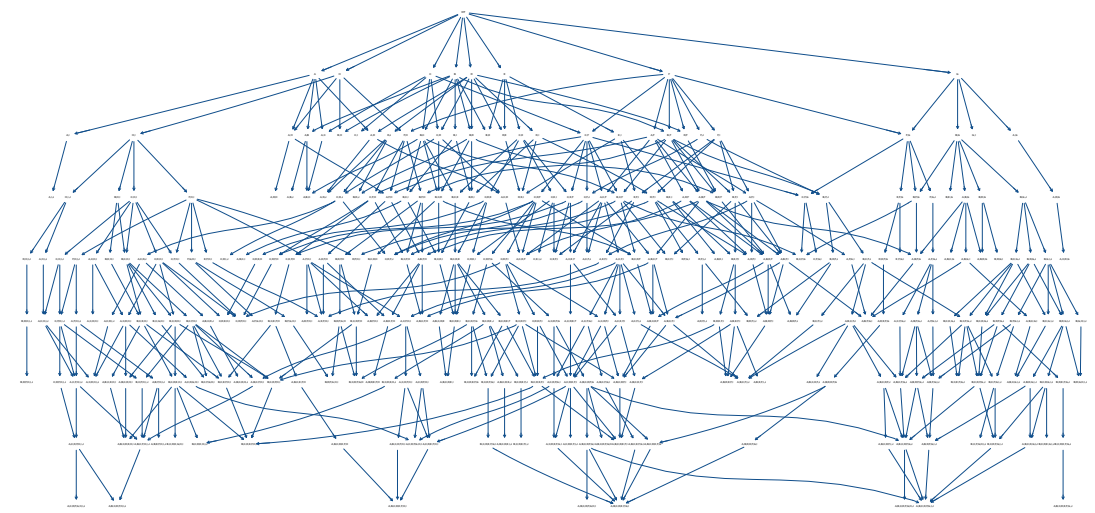

ID ikuJV711Pr9P5gMR  
 acc genotypes 54  
 peaks no back 25  
 removed edges NA  
 prop rem edges NA

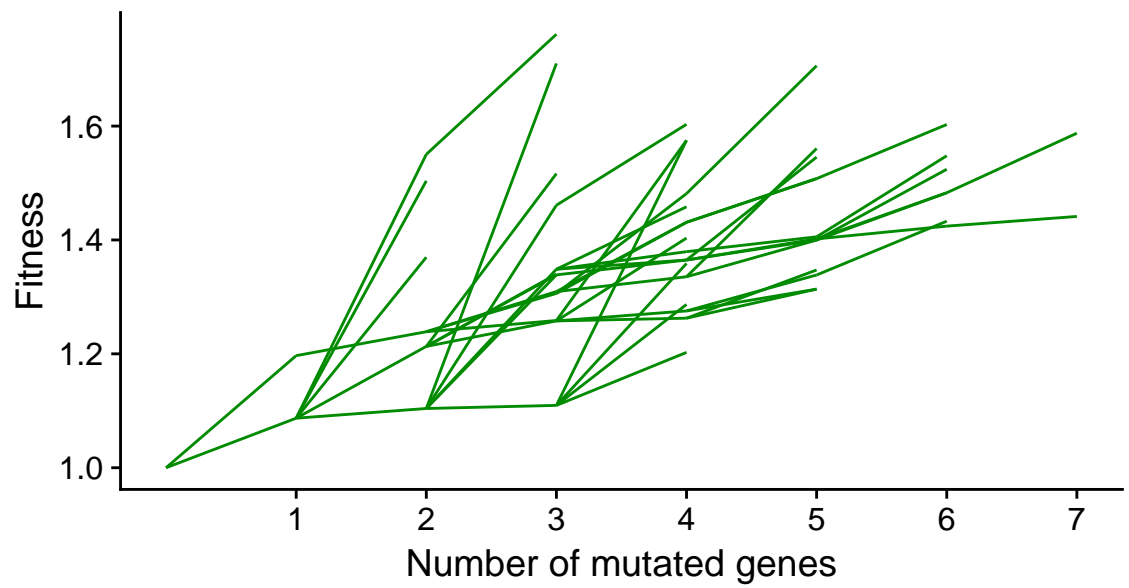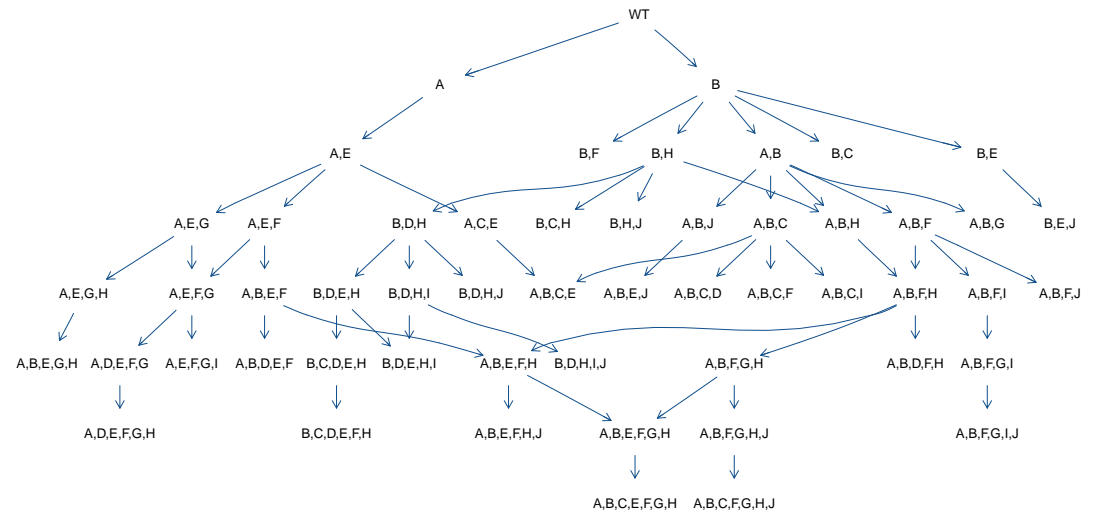



ID **irlmocl1nEJmK32**  
 acc genotypes **95**  
 peaks no back **46**  
 removed edges **NA**  
 prop rem edges **NA**

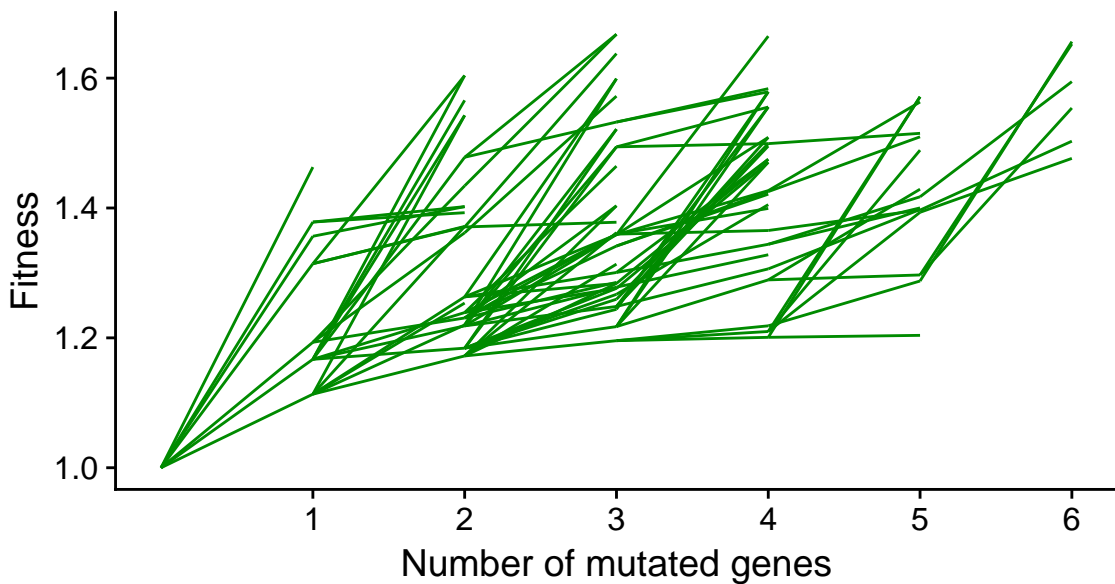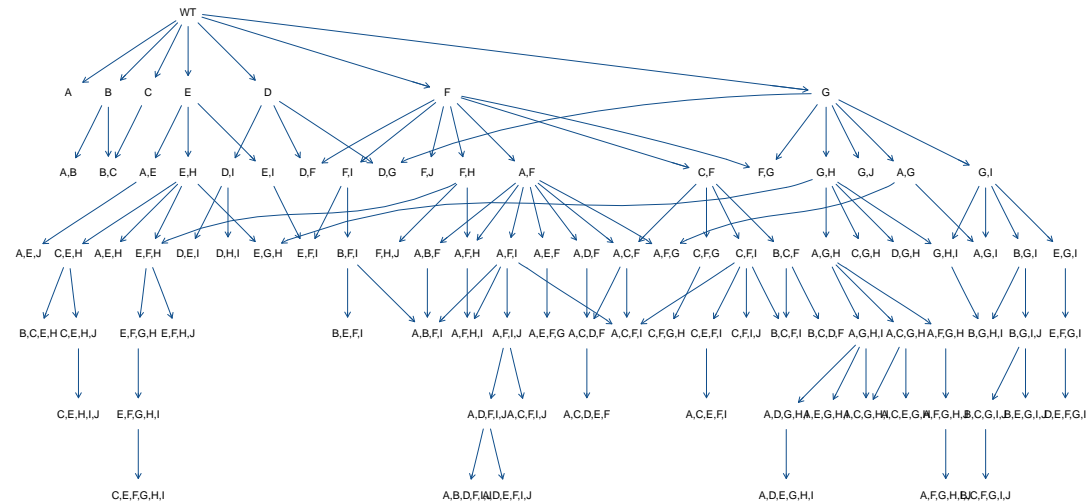

ID **itu7sgxZ42Rqmcw**  
 acc genotypes **140**  
 peaks no back **36**  
 removed edges **NA**  
 prop rem edges **NA**

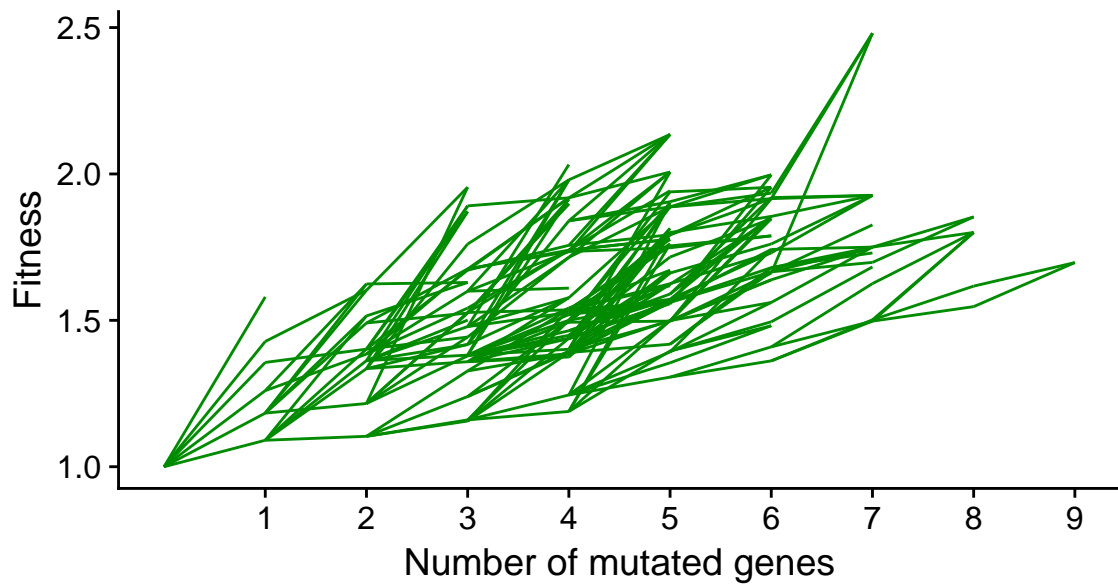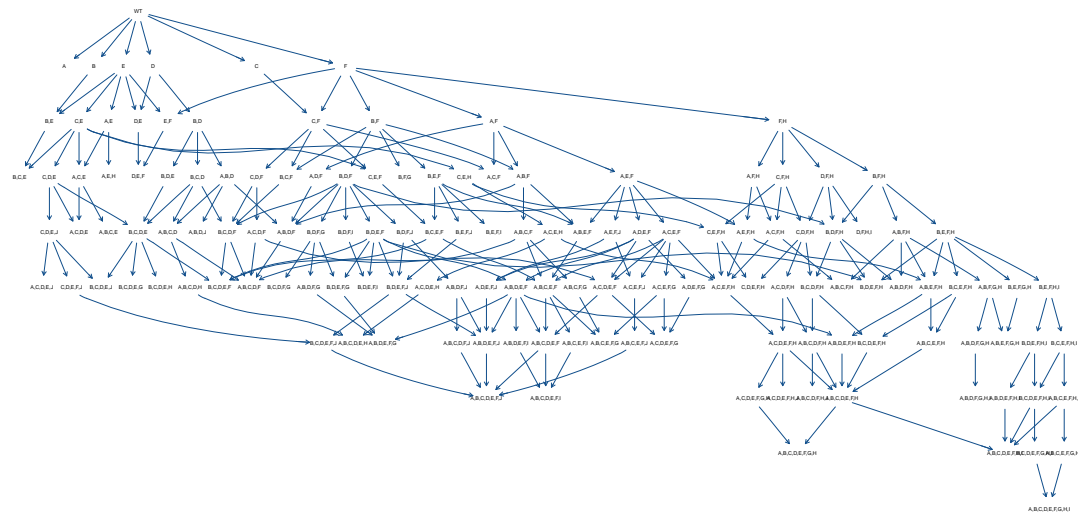

ID IxTaa10yvF9m8psni  
 acc genotypes 188  
 peaks no back 61  
 removed edges NA  
 prop rem edges NA

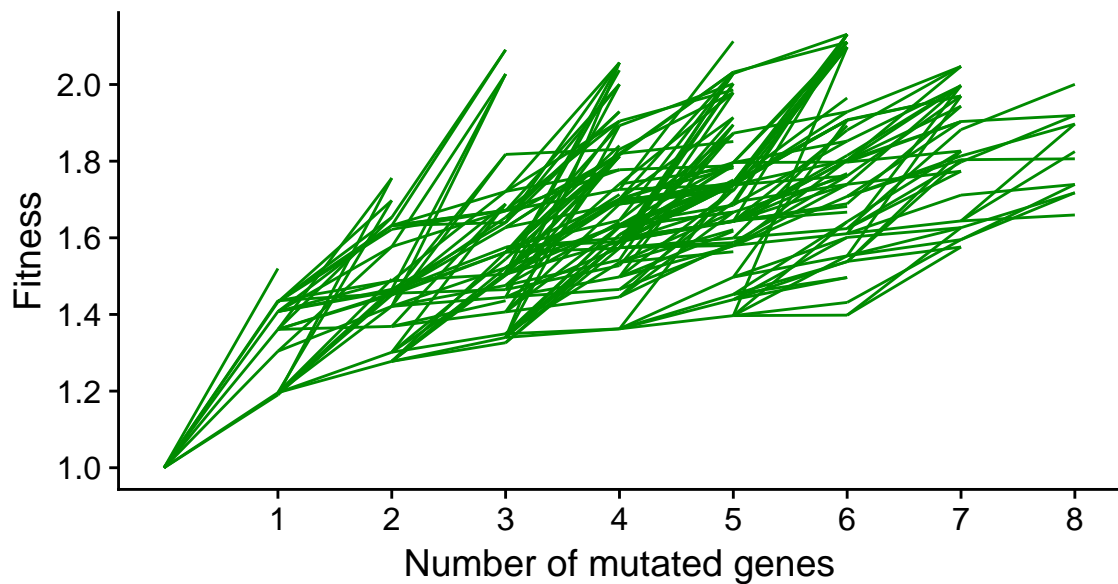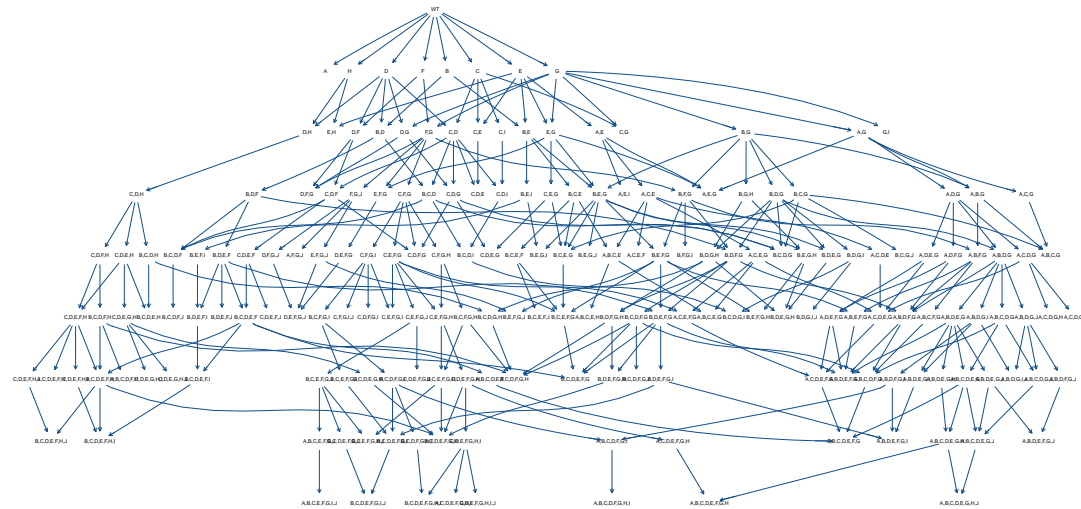

ID **j5Wlsy8xtbP8JPCd**  
 acc genotypes **115**  
 peaks no back **54**  
 removed edges **NA**  
 prop rem edges **NA**

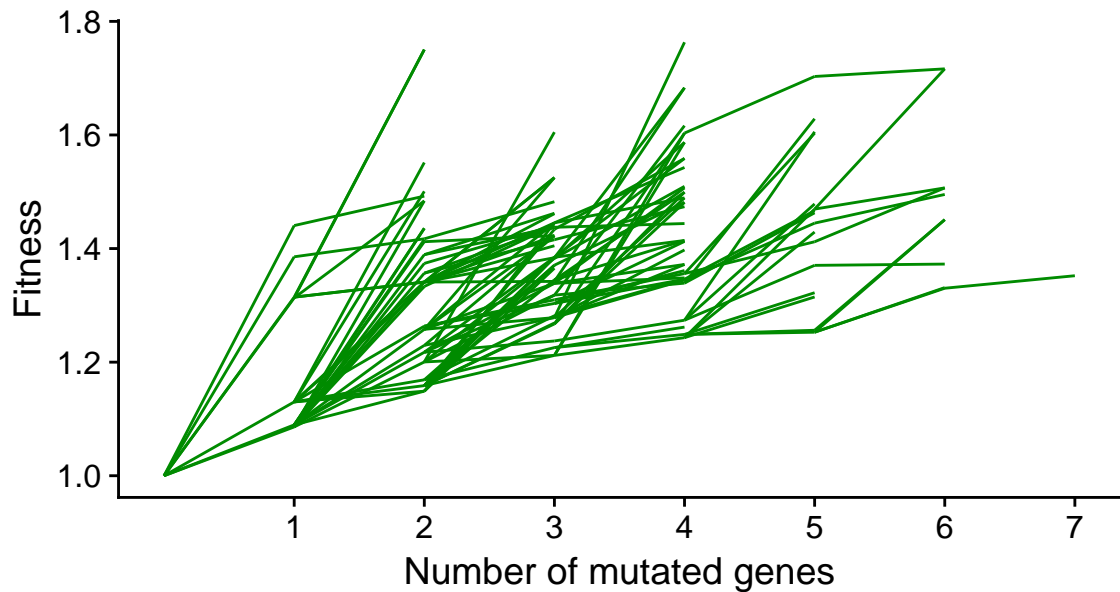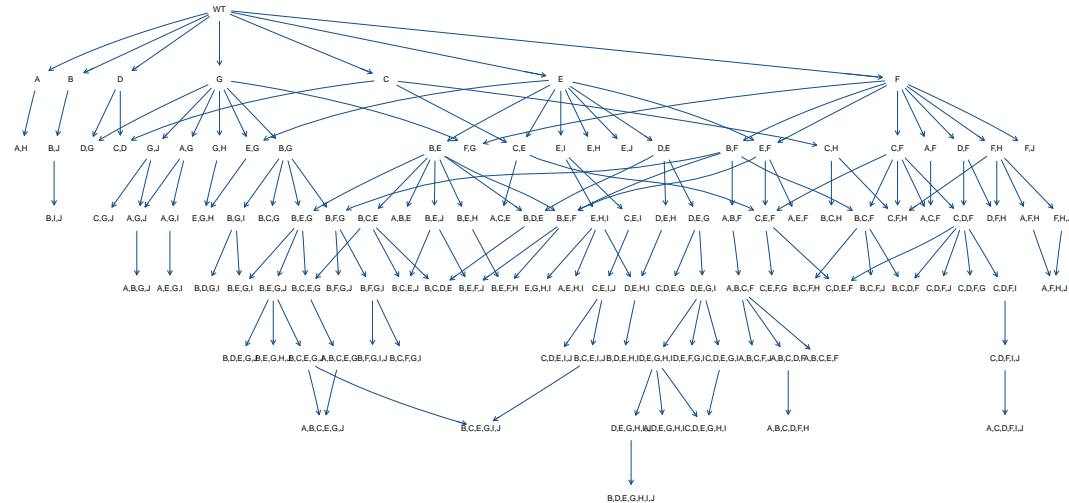

ID J6cFc1nMWhianSvF  
 acc genotypes 189  
 peaks no back 73  
 removed edges NA  
 prop rem edges NA

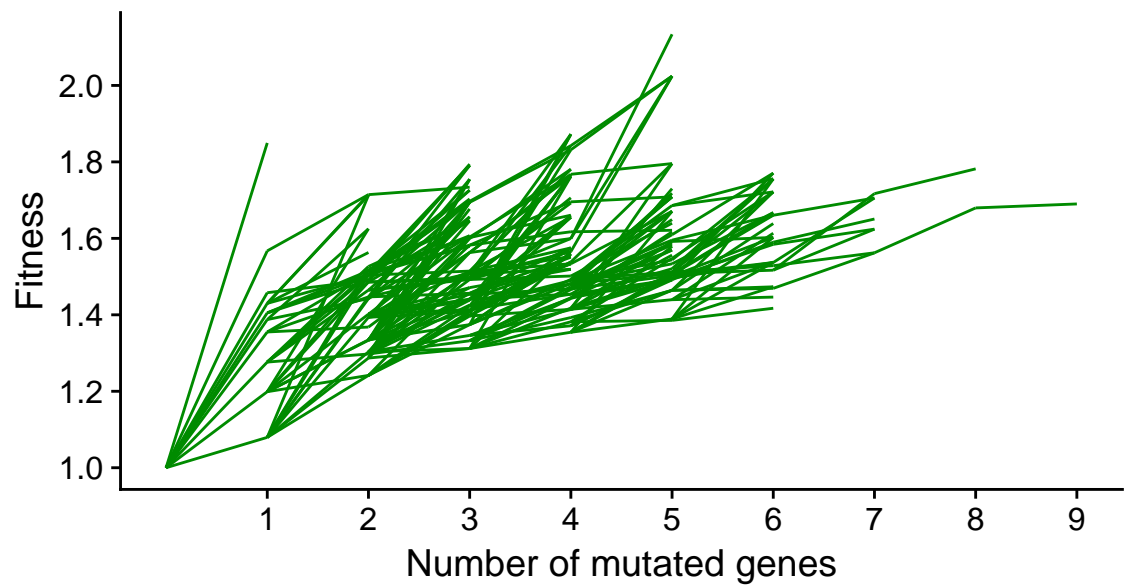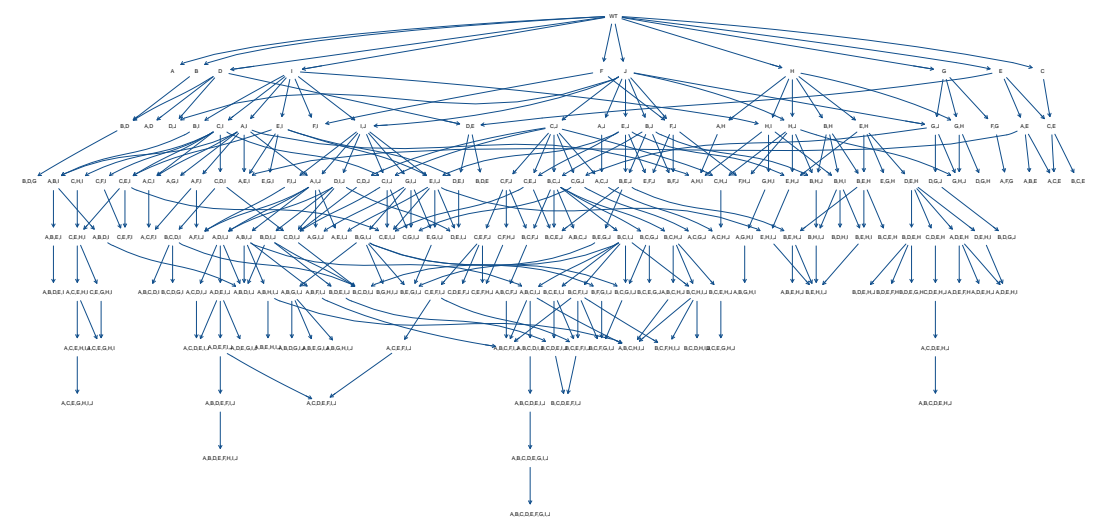

*ID* jANbFMNMm7Hj8B10  
*acc genotypes* 735  
*peaks no back* 93  
*removed edges* NA  
*prop rem edges* NA

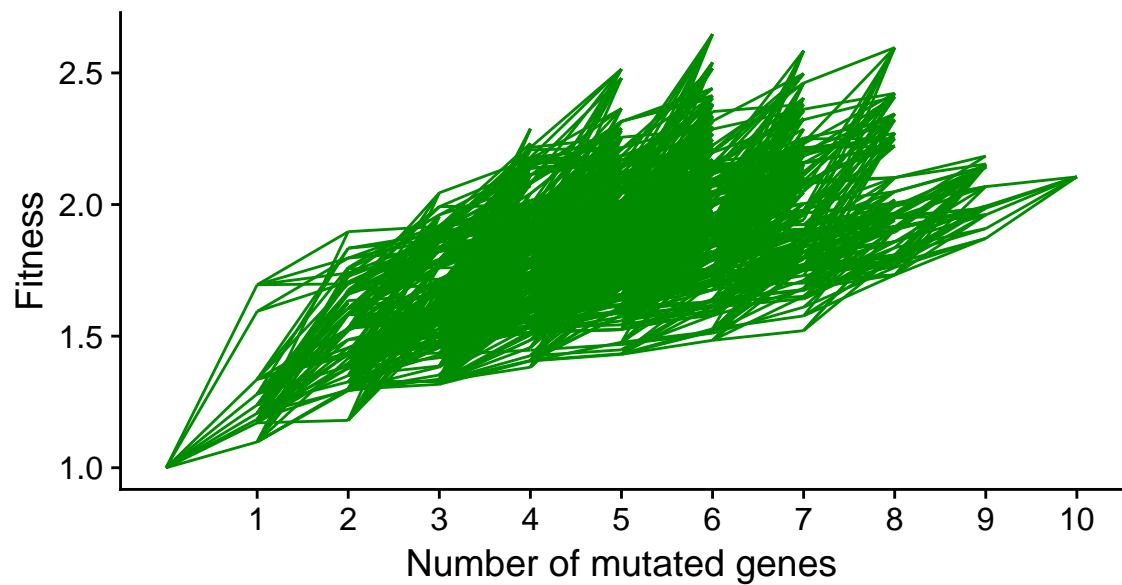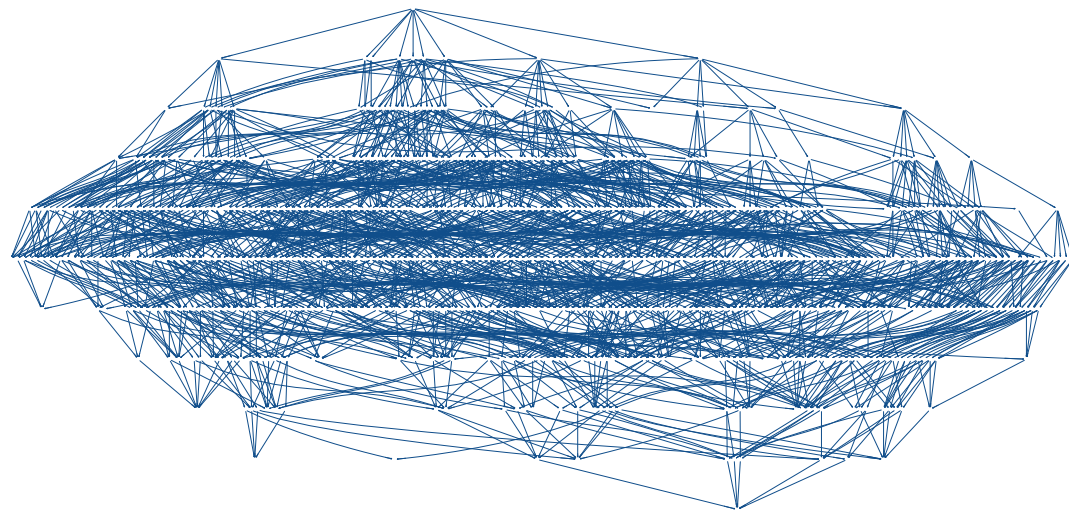

ID **jQBPZk8ZII14NJWW**  
 acc genotypes **88**  
 peaks no back **31**  
 removed edges **NA**  
 prop rem edges **NA**

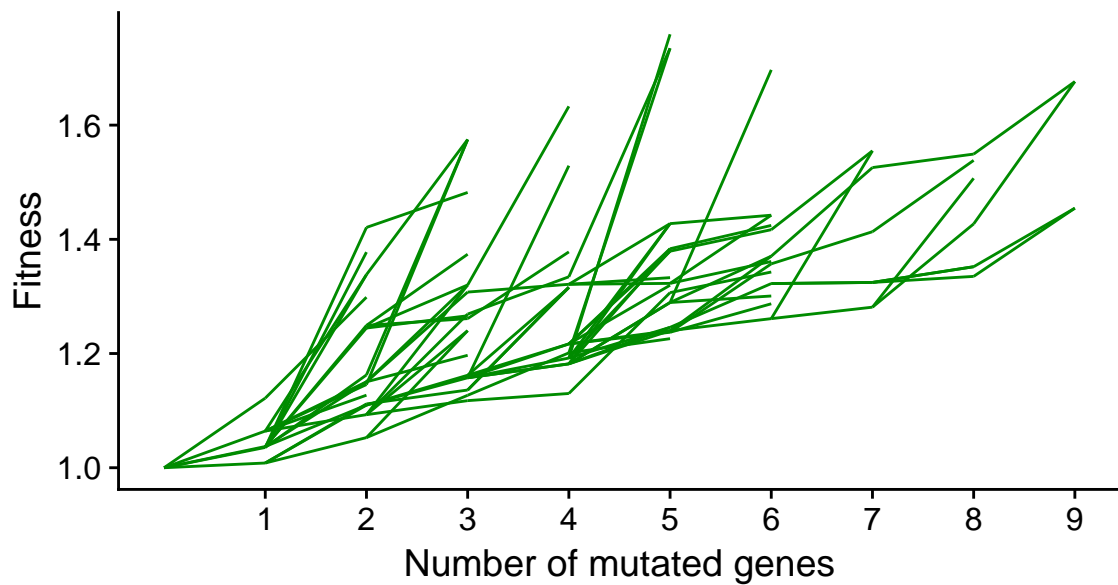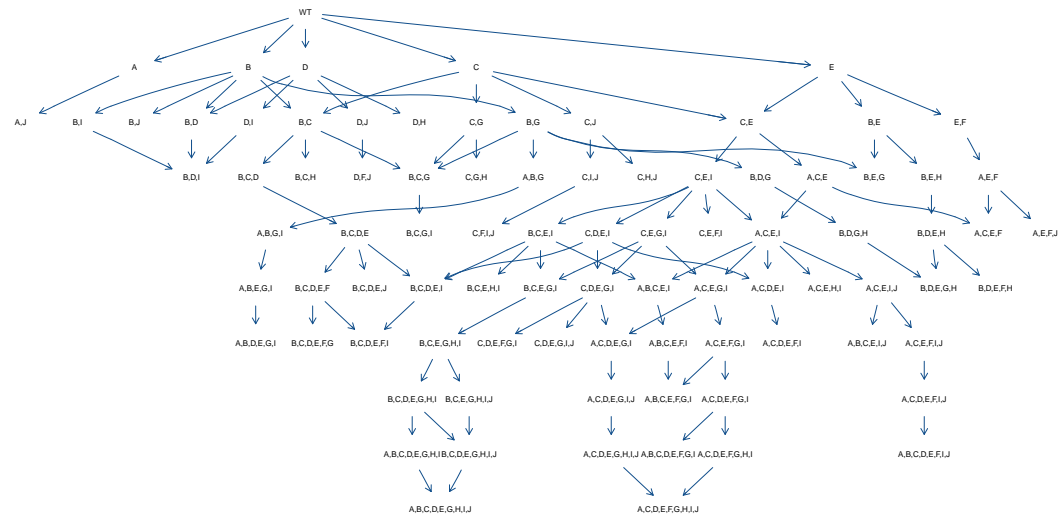

ID K4fDyrolukDwi9Ma  
 acc genotypes 145  
 peaks no back 53  
 removed edges NA  
 prop rem edges NA

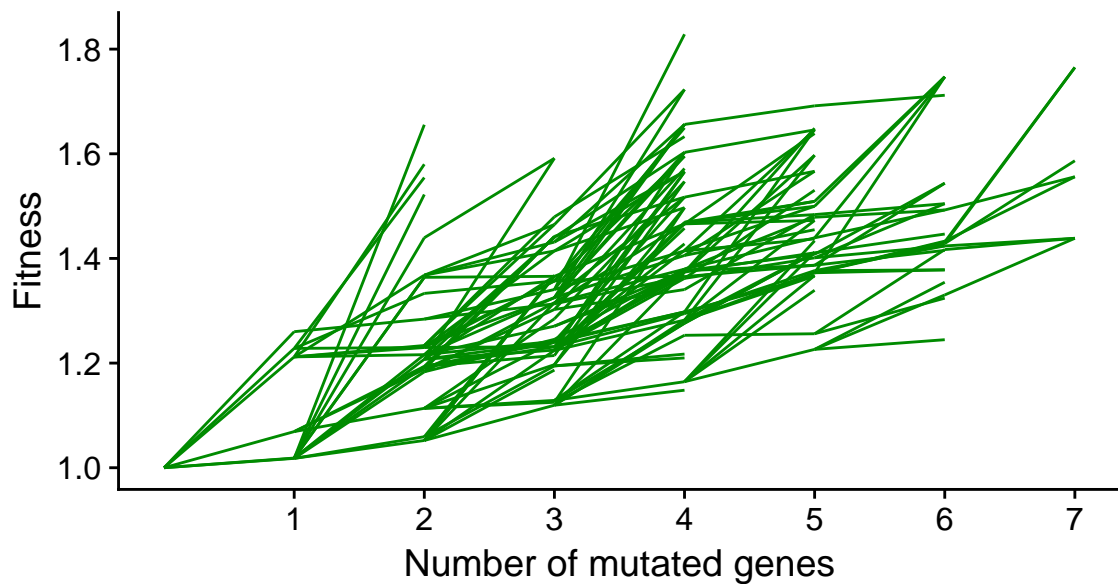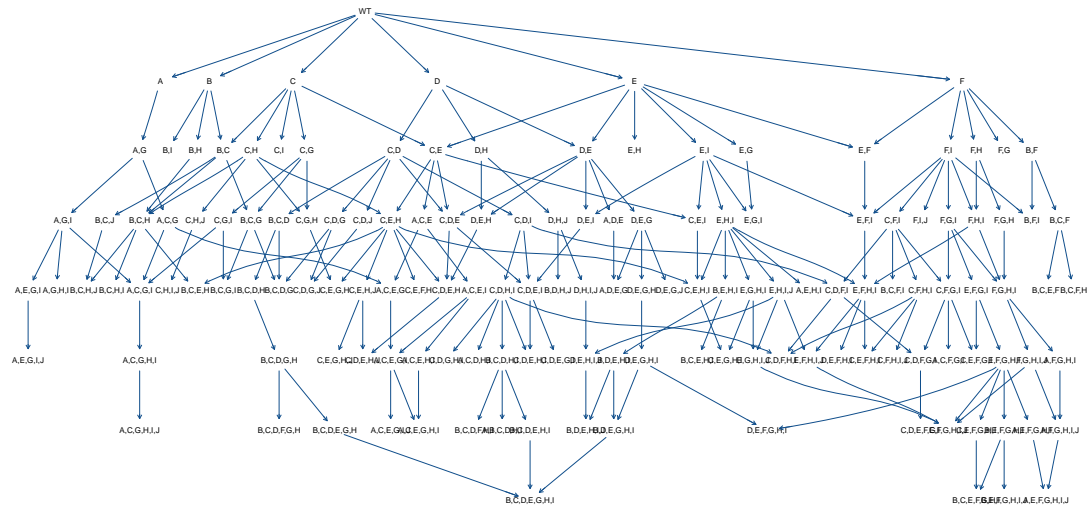



ID k4Otpn3TVpfZN7m  
acc genotypes 166  
peaks no back 64  
removed edges NA  
prop rem edges NA

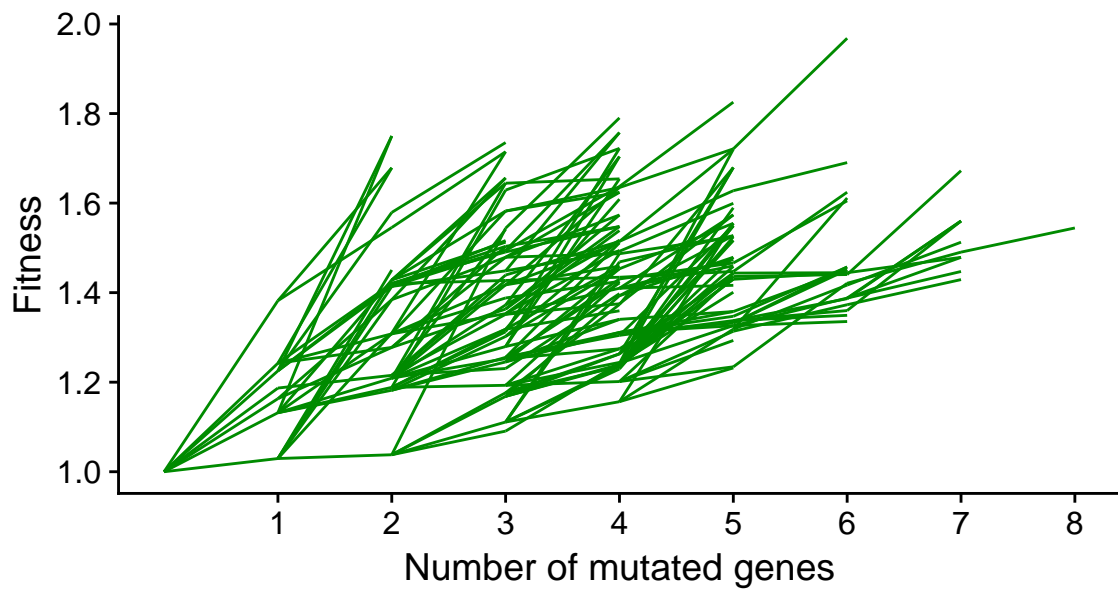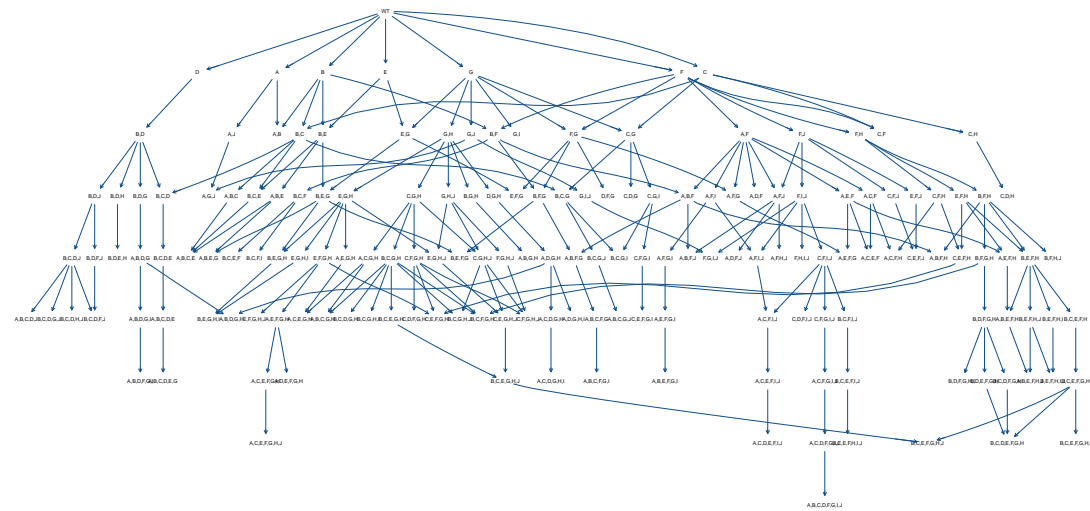

ID **k9EeYCy4KVgVd19l**  
 acc genotypes **82**  
 peaks no back **35**  
 removed edges **NA**  
 prop rem edges **NA**

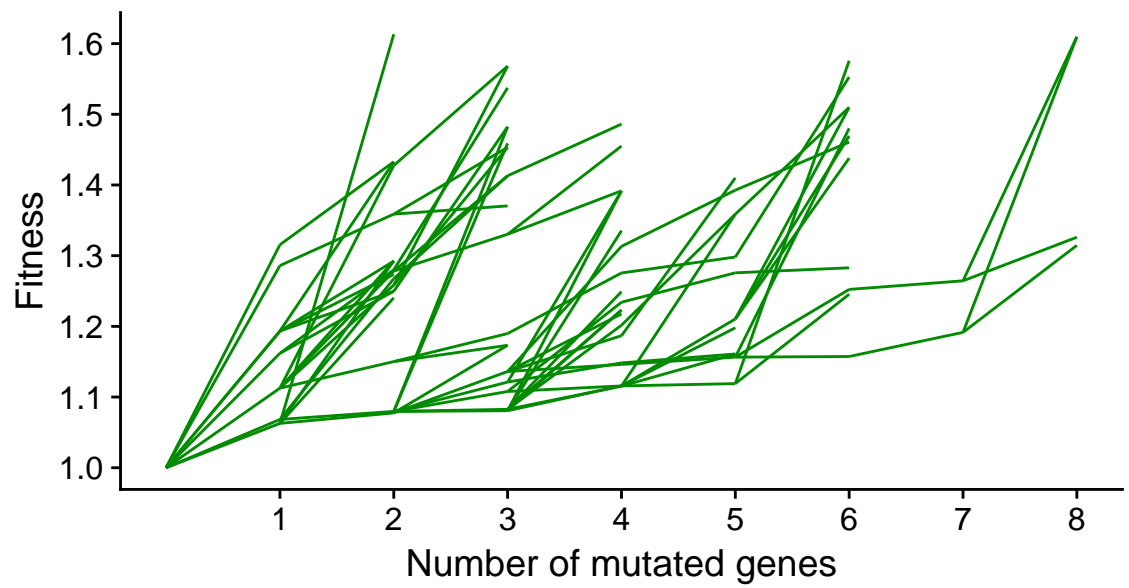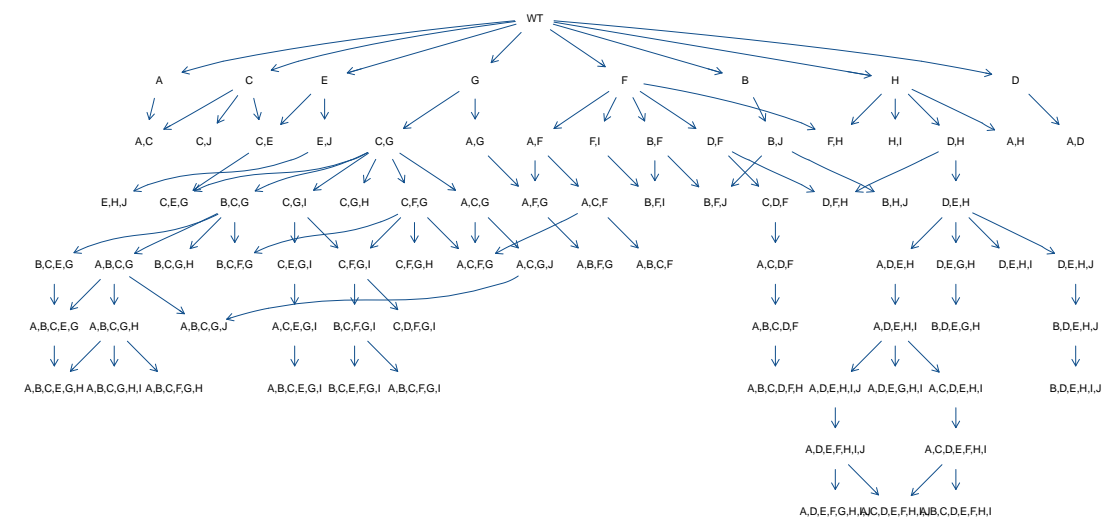

*ID* KB10V10fR8eSnvo1Wn  
*acc genotypes* 255  
*peaks no back* 59  
*removed edges* NA  
*prop rem edges* NA

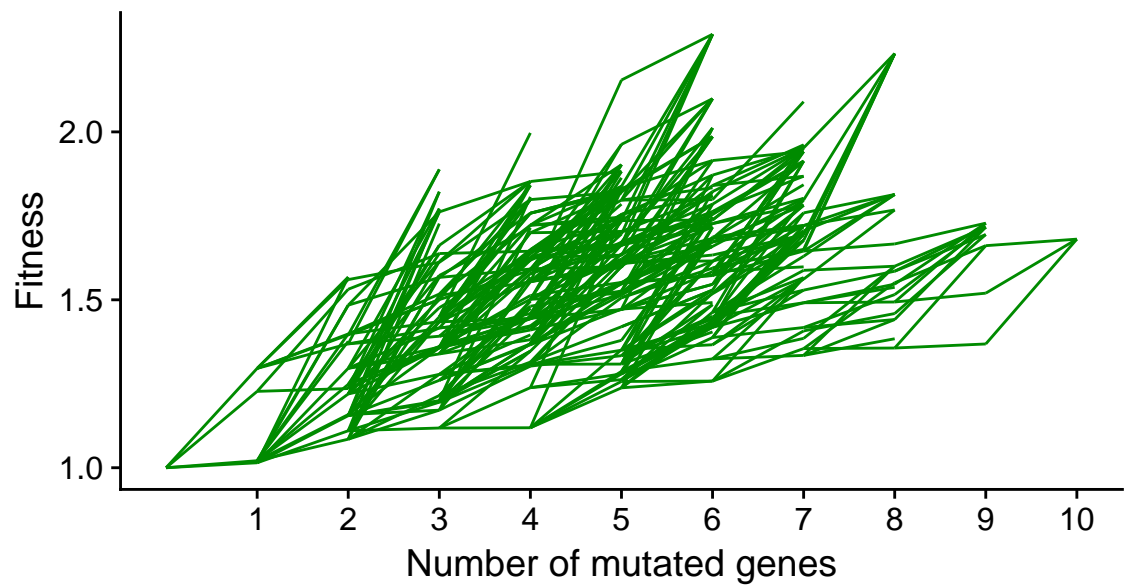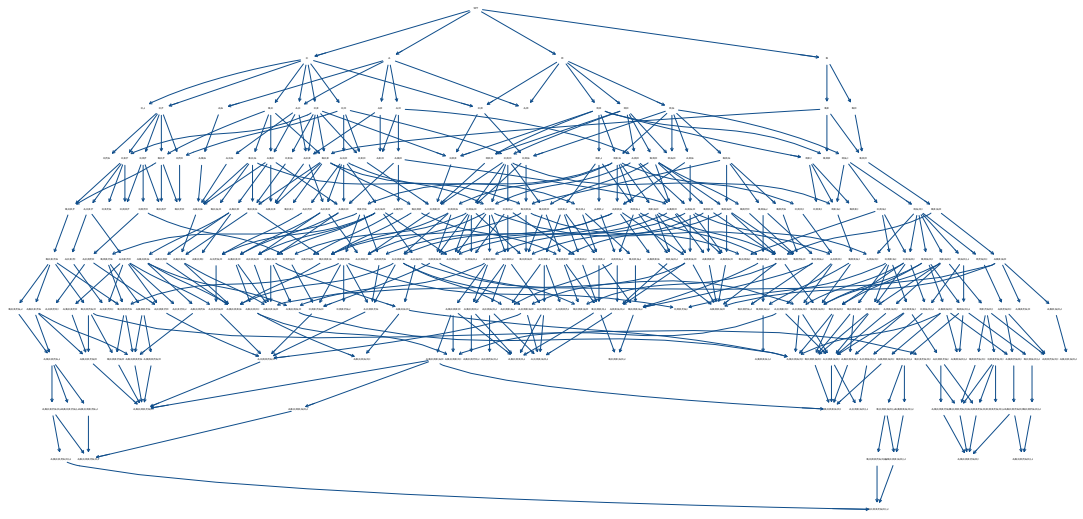

*ID* kEEjEwfuinUR9Smg  
*acc genotypes* 707  
*peaks no back* 92  
*removed edges* NA  
*prop rem edges* NA

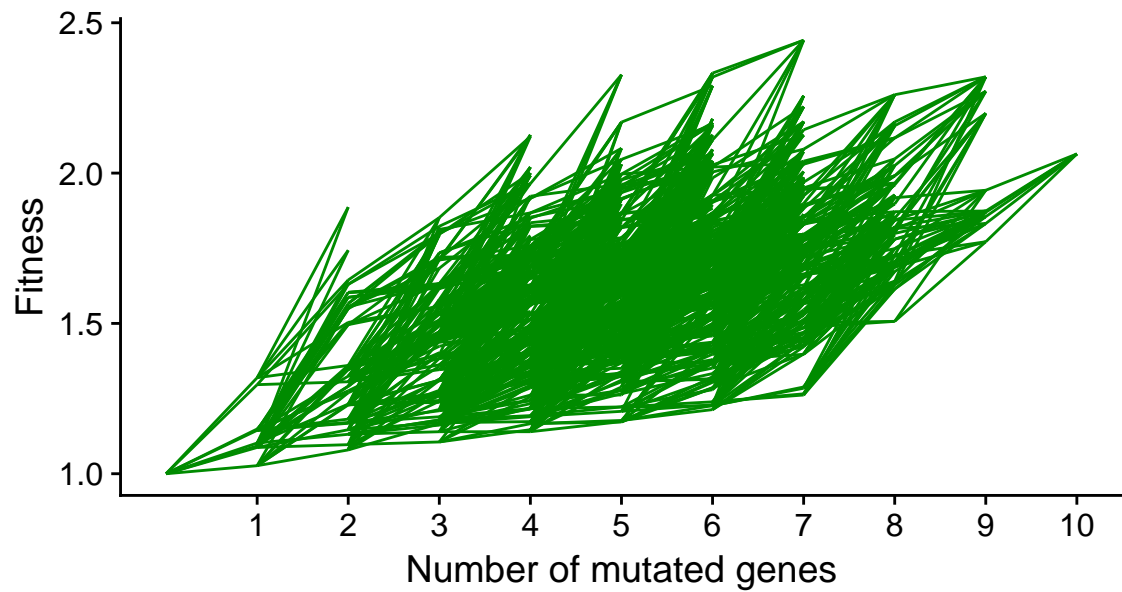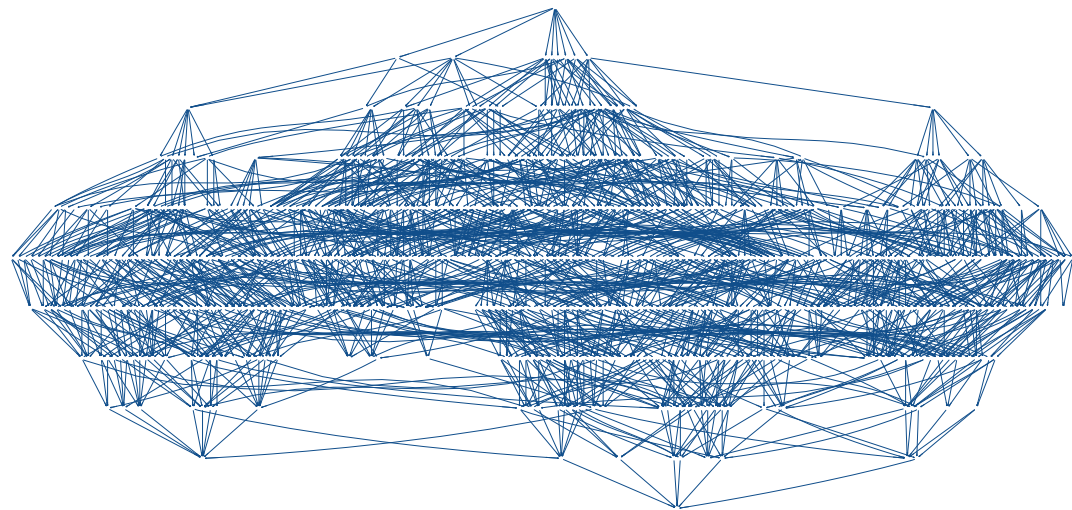

ID kfHftKfTcY9lyTX3  
 acc genotypes 207  
 peaks no back 79  
 removed edges NA  
 prop rem edges NA

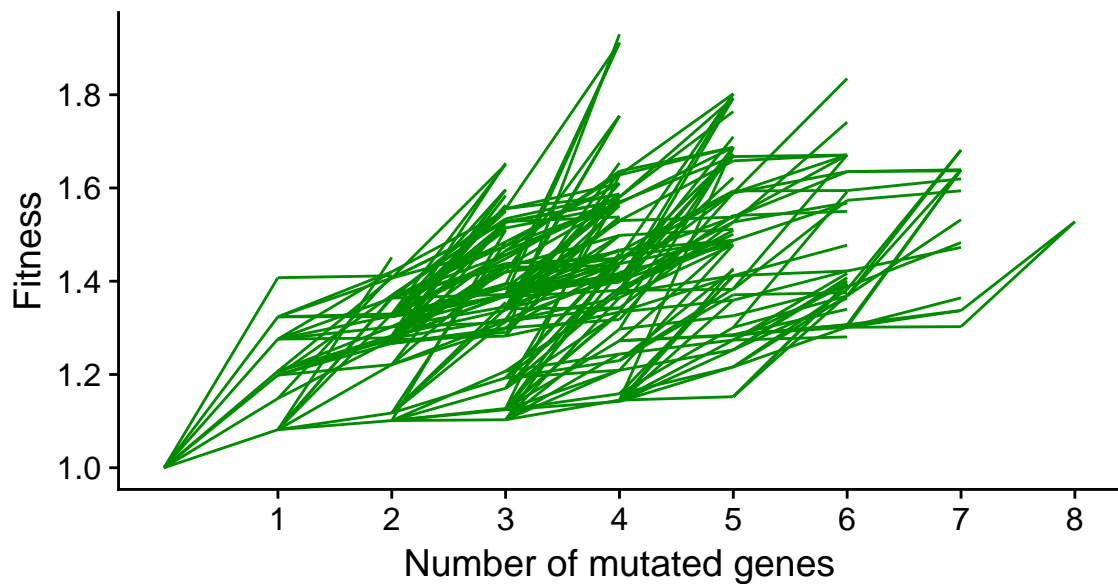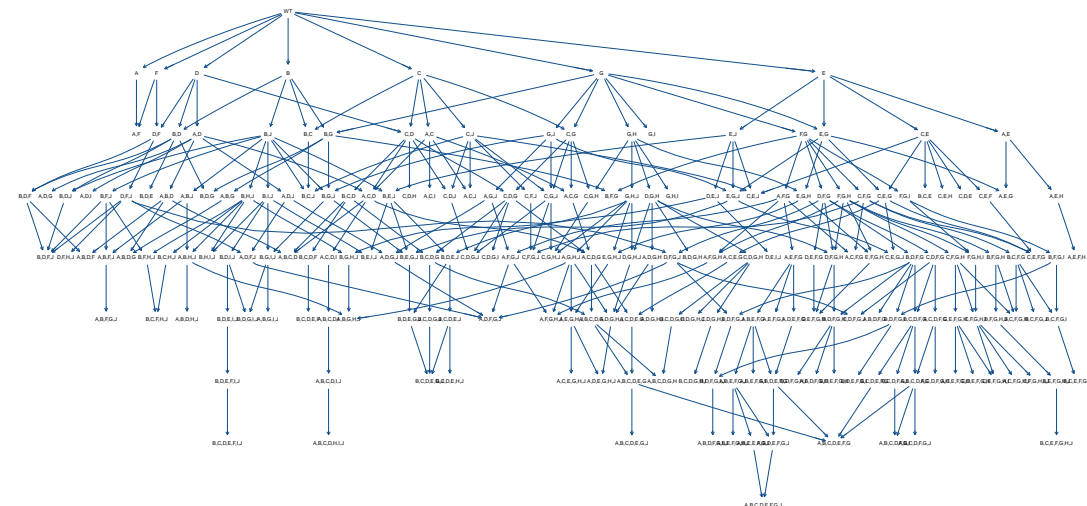

ID KJpT1Yp64Tw10qzk10  
 acc genotypes 35  
 peaks no back 16  
 removed edges NA  
 prop rem edges NA

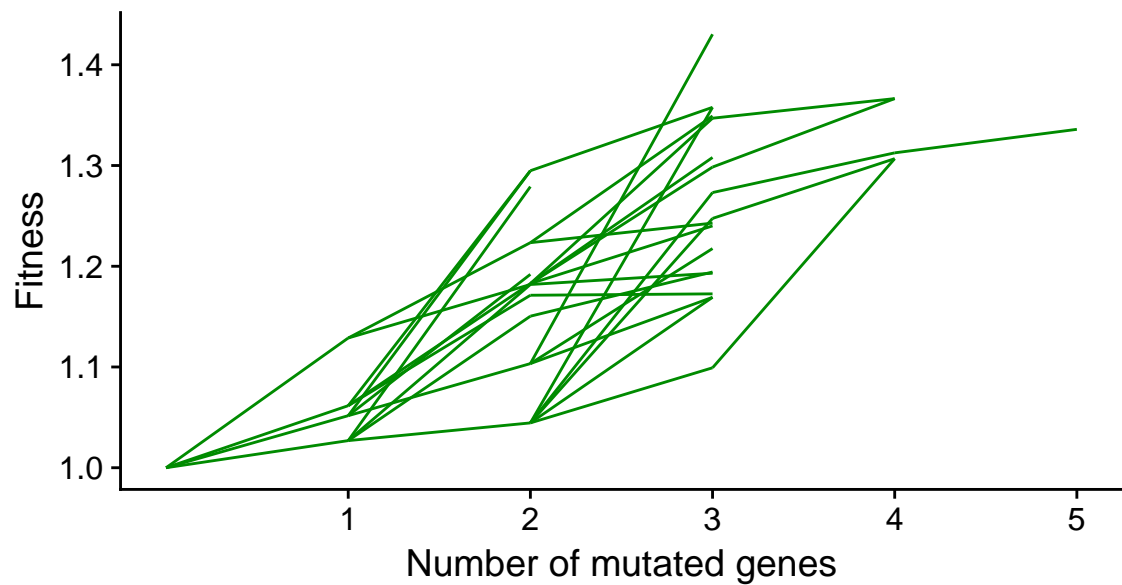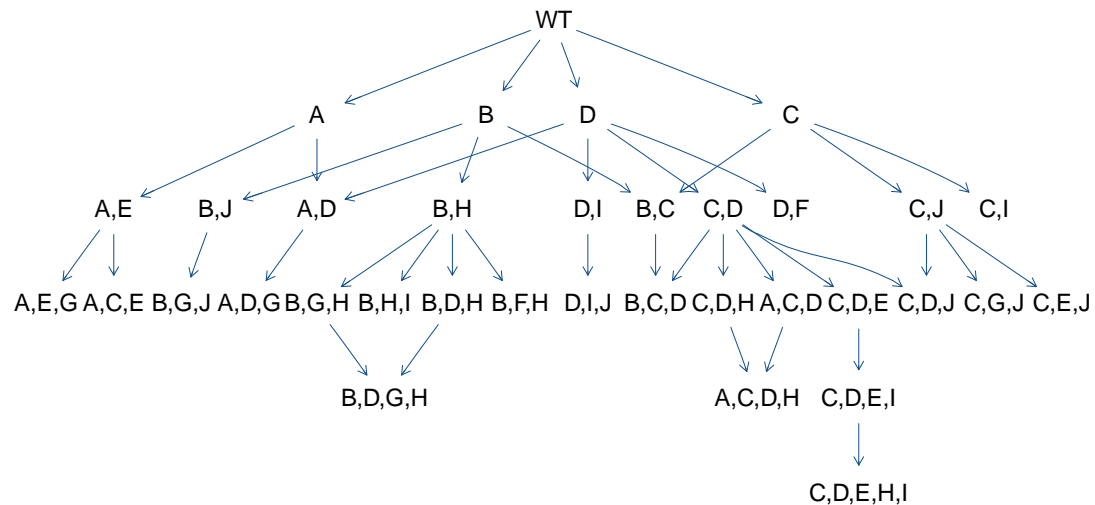

ID KVDBUlaSExVhtPy5  
 acc genotypes 187  
 peaks no back 57  
 removed edges NA  
 prop rem edges NA

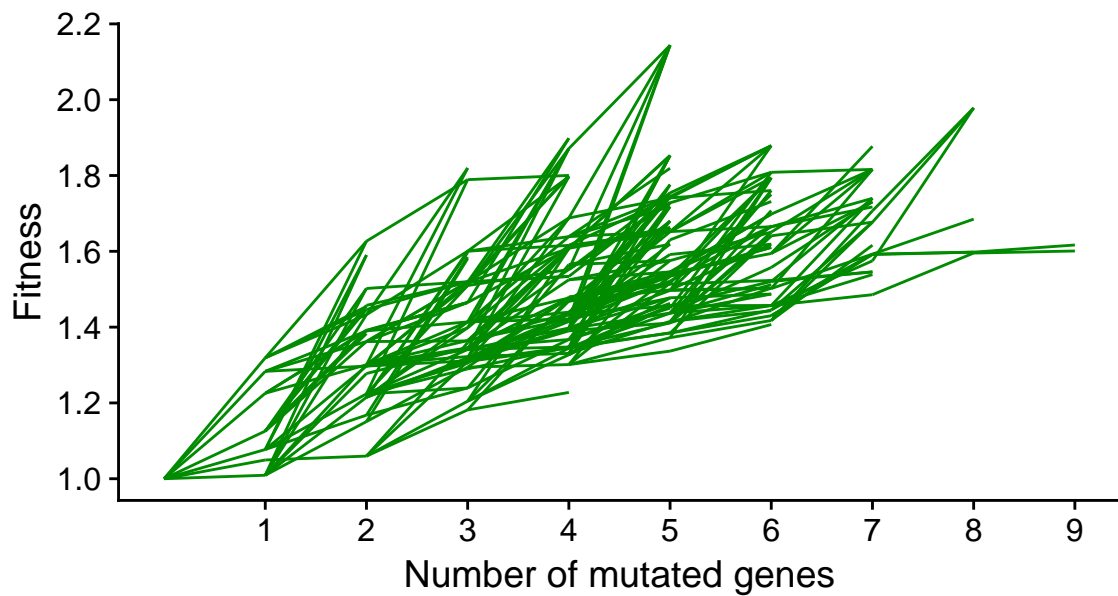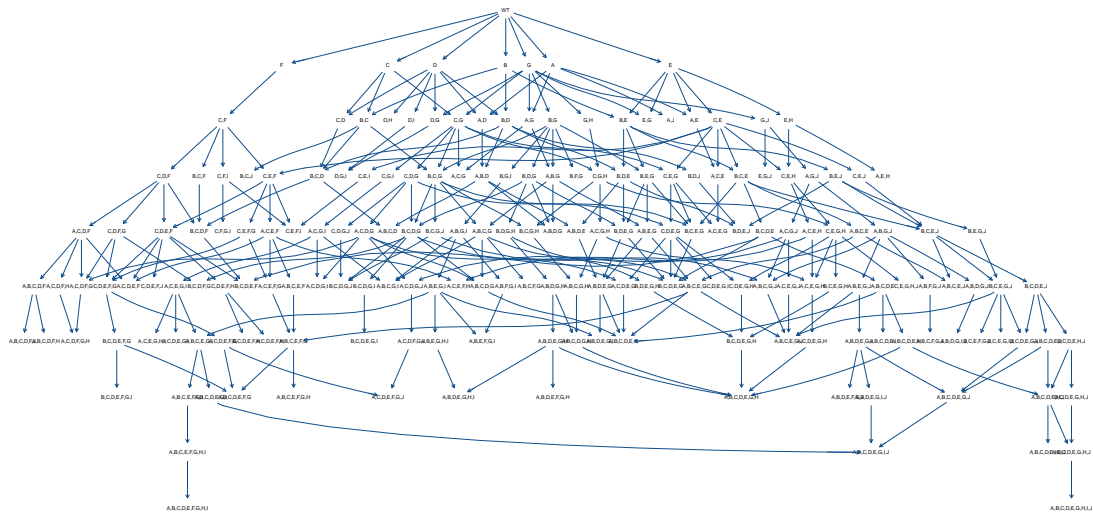

*ID* 110y29Tq5MlxxOTsw  
*acc genotypes* 465  
*peaks no back* 98  
*removed edges* NA  
*prop rem edges* NA

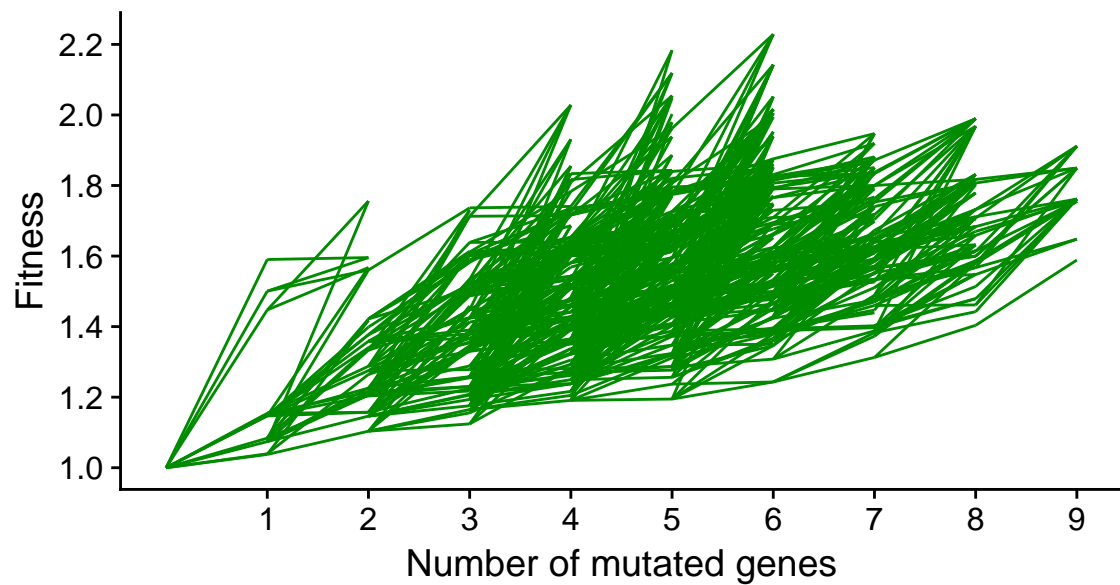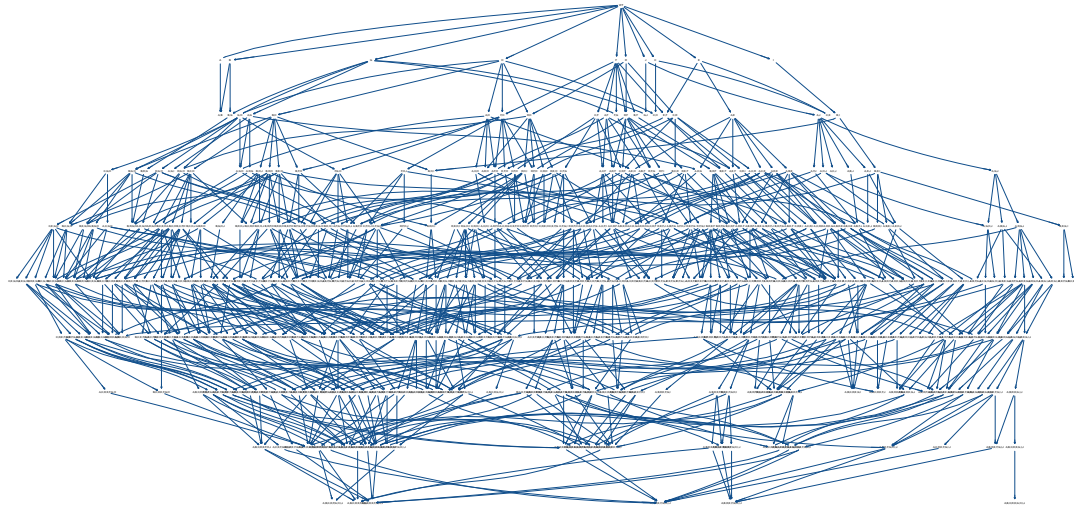



ID La9fqNjWh3MIhyOc  
acc genotypes 286  
peaks no back 51  
removed edges NA  
prop rem edges NA

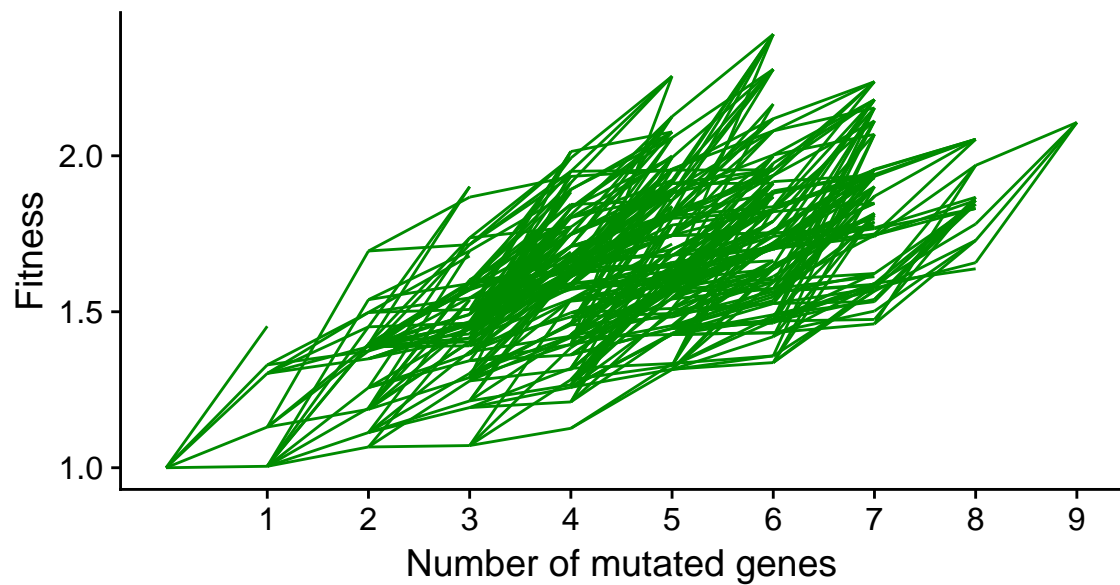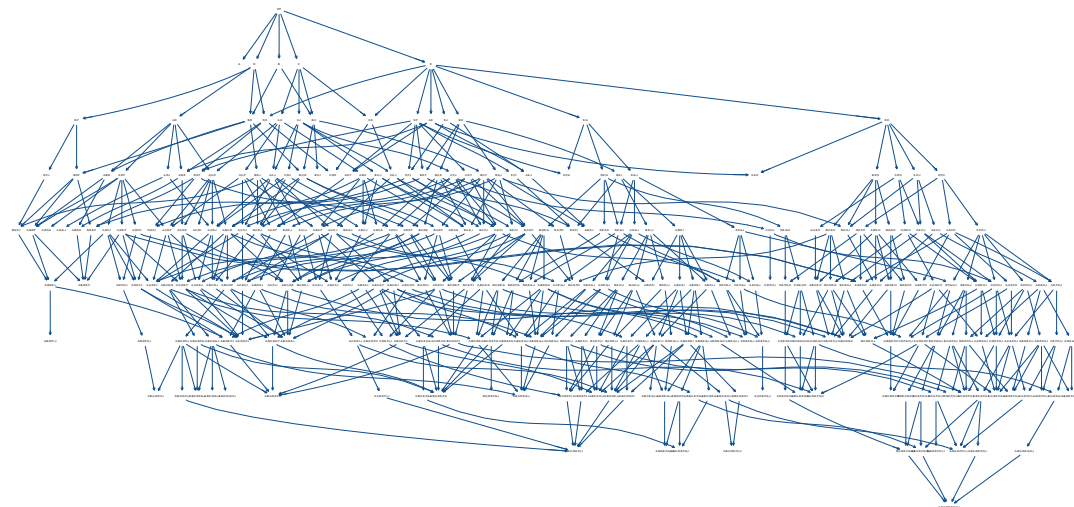

ID LarH6pnhHub1WCoT  
 acc genotypes 119  
 peaks no back 34  
 removed edges NA  
 prop rem edges NA

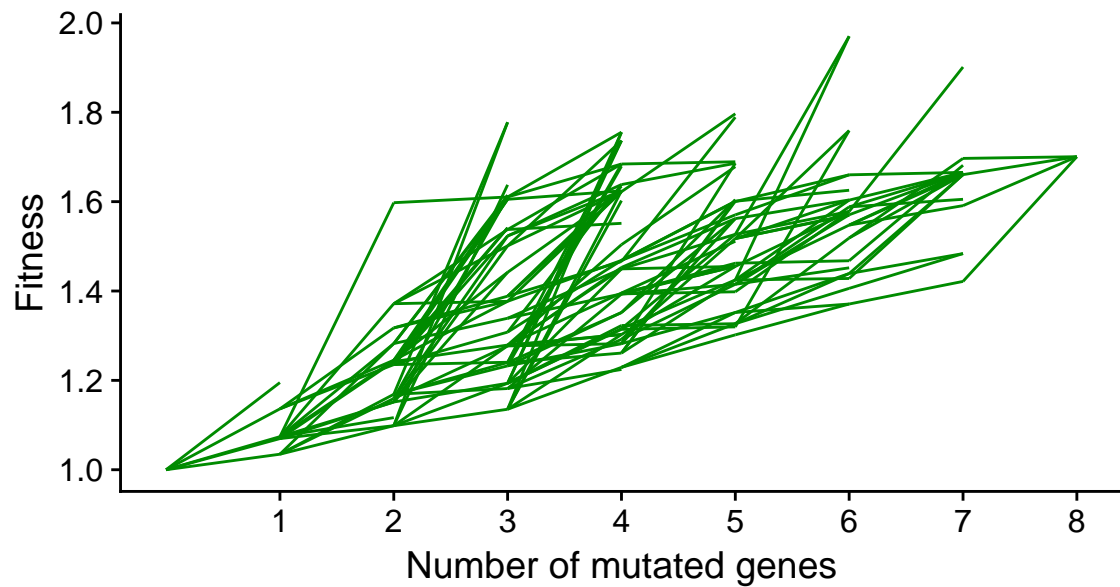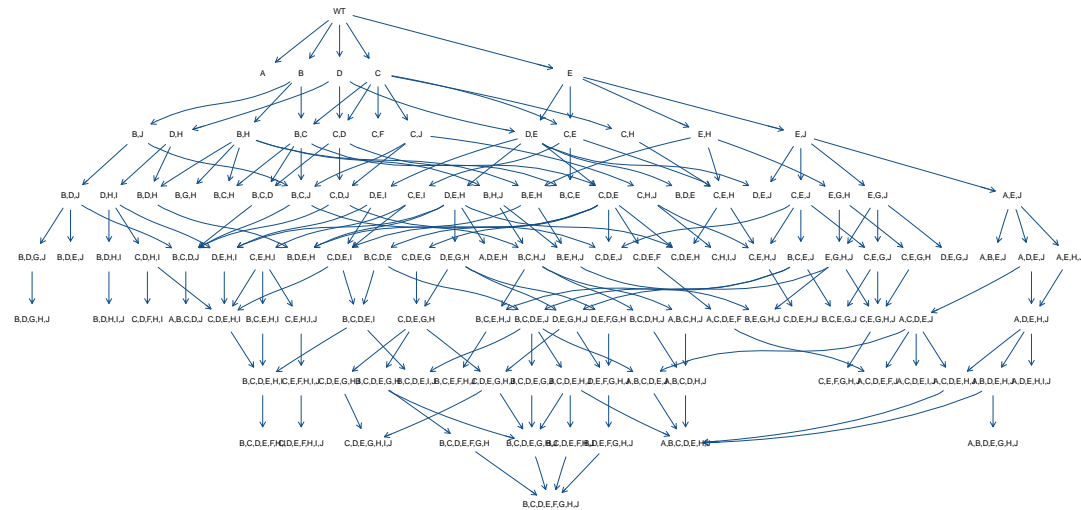

ID **liglbsdWsdVrYD4**  
 acc genotypes **183**  
 peaks no back **56**  
 removed edges **NA**  
 prop rem edges **NA**

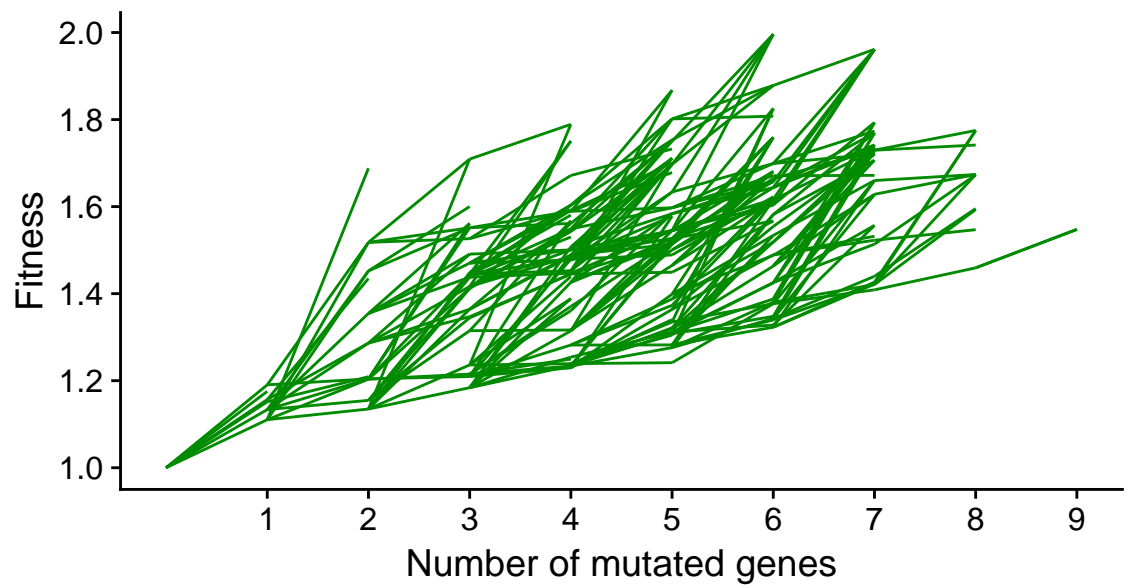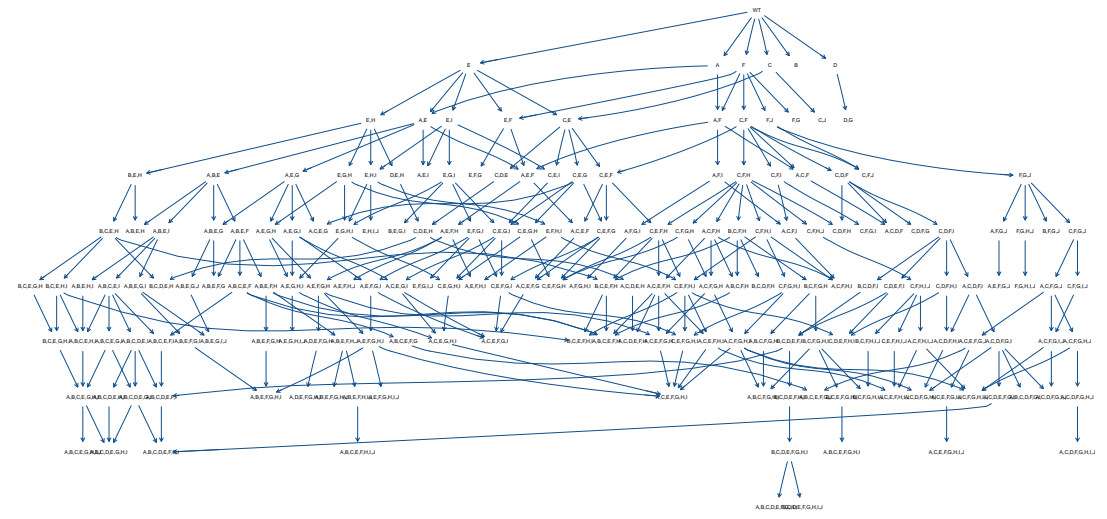

ID LjALbpwaXmX67y1J  
 acc genotypes 200  
 peaks no back 60  
 removed edges NA  
 prop rem edges NA

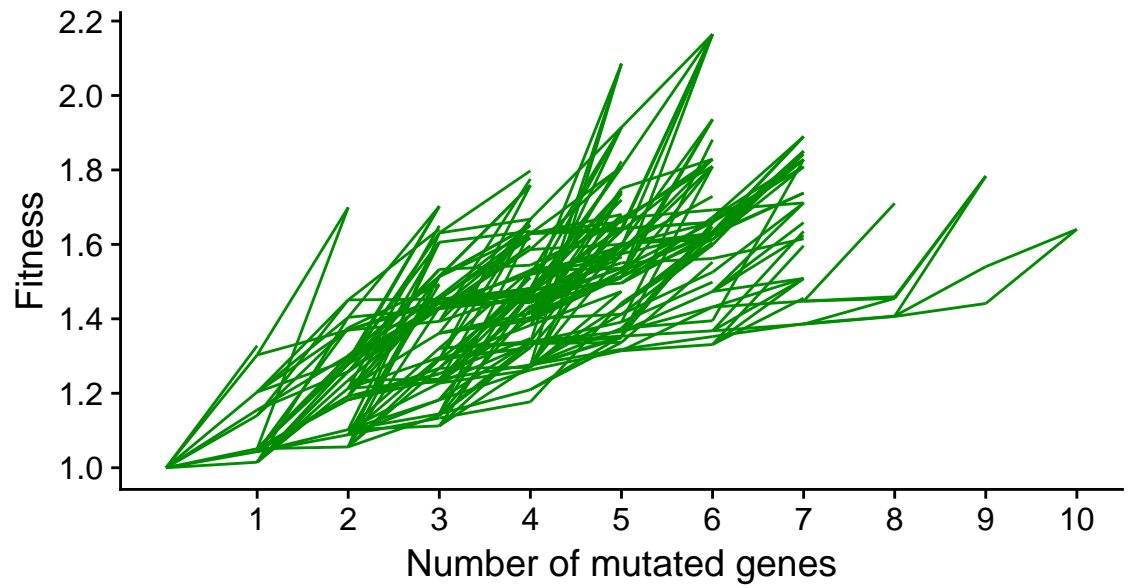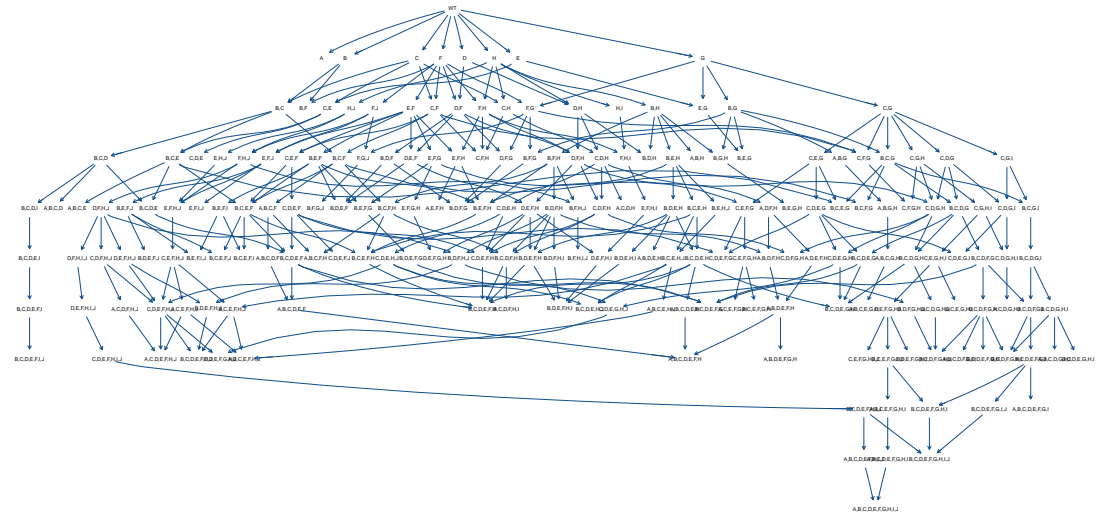

ID L0sXXnHBIR9Q10wUS  
 acc genotypes 135  
 peaks no back 40  
 removed edges NA  
 prop rem edges NA

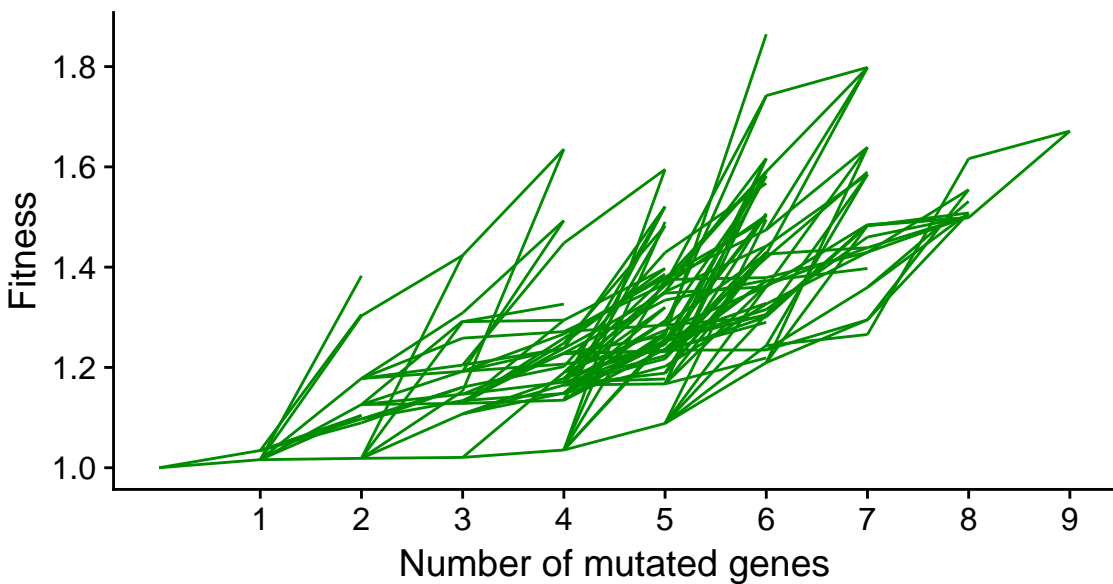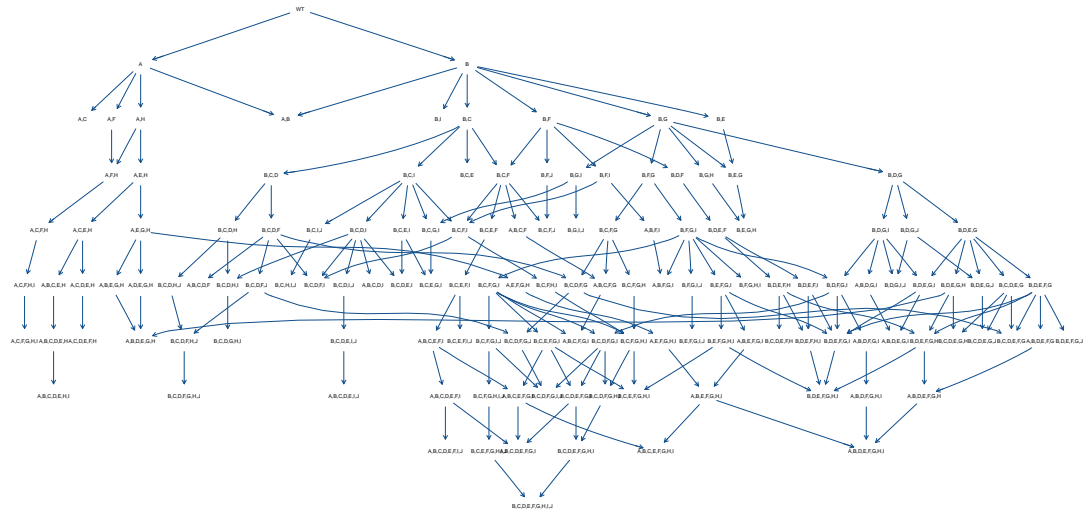

ID LPrNa9xFzuJVcvTs  
 acc genotypes 132  
 peaks no back 51  
 removed edges NA  
 prop rem edges NA

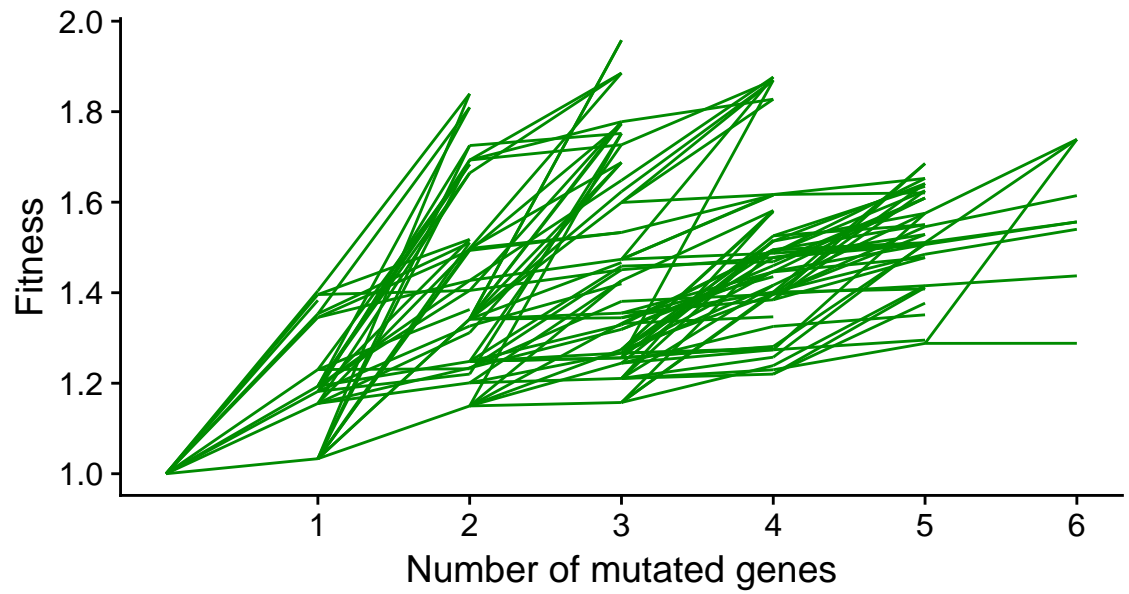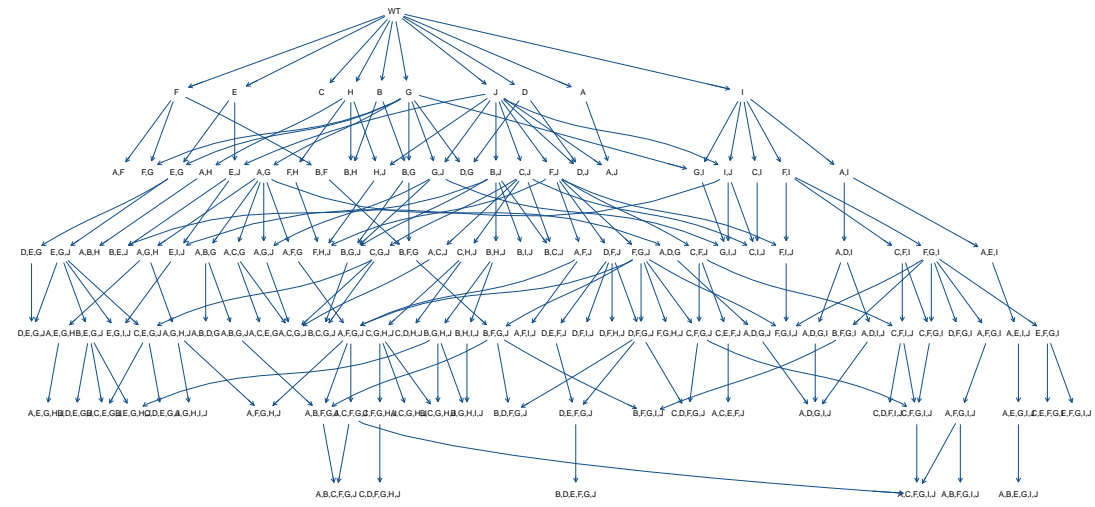

*ID* ltssjb6NCBgdBABA  
*acc genotypes* 232  
*peaks no back* 86  
*removed edges* NA  
*prop rem edges* NA

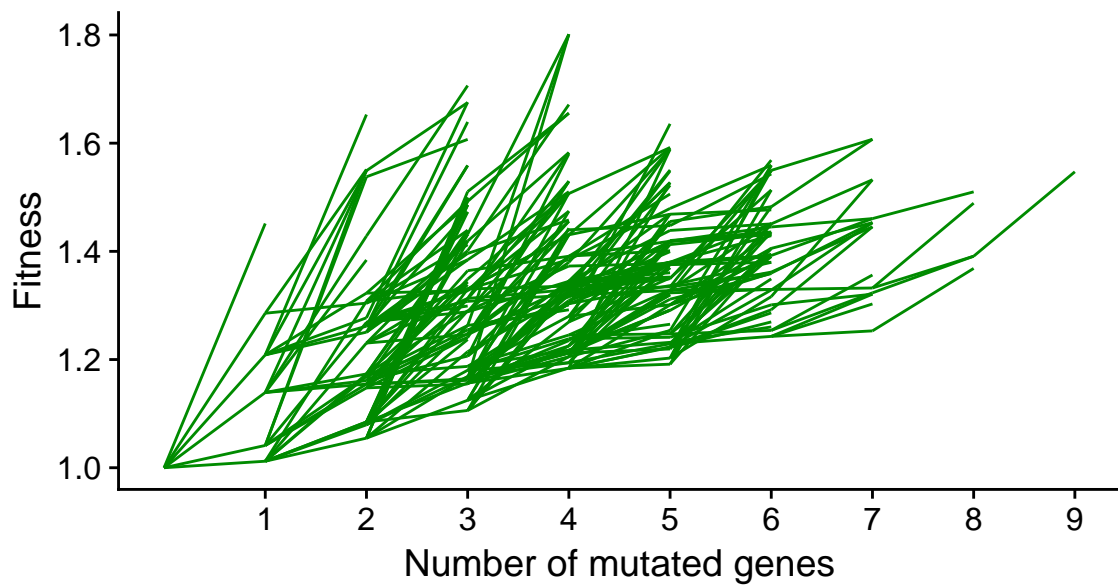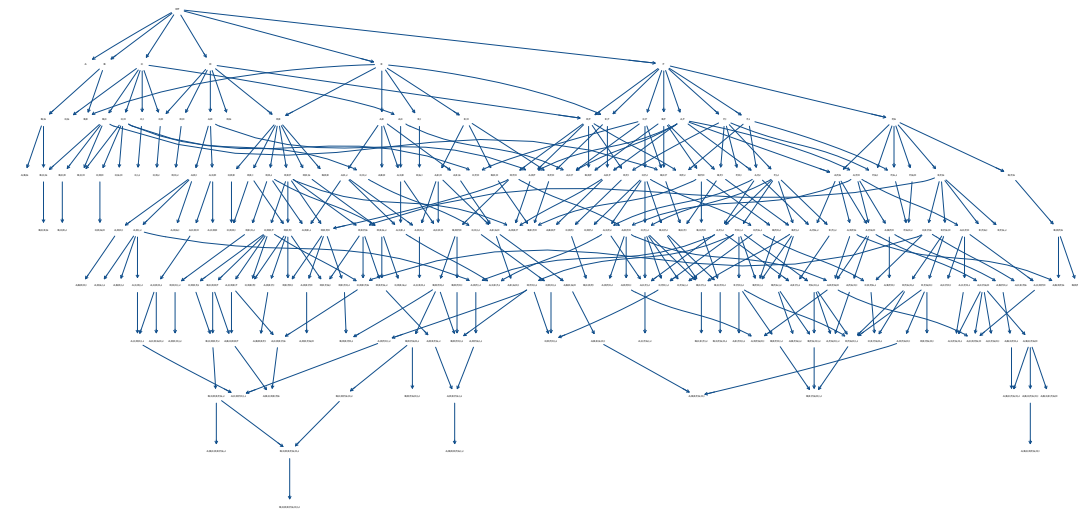

*ID* LYJJKjl6A3xWjKwy  
*acc genotypes* 289  
*peaks no back* 75  
*removed edges* NA  
*prop rem edges* NA

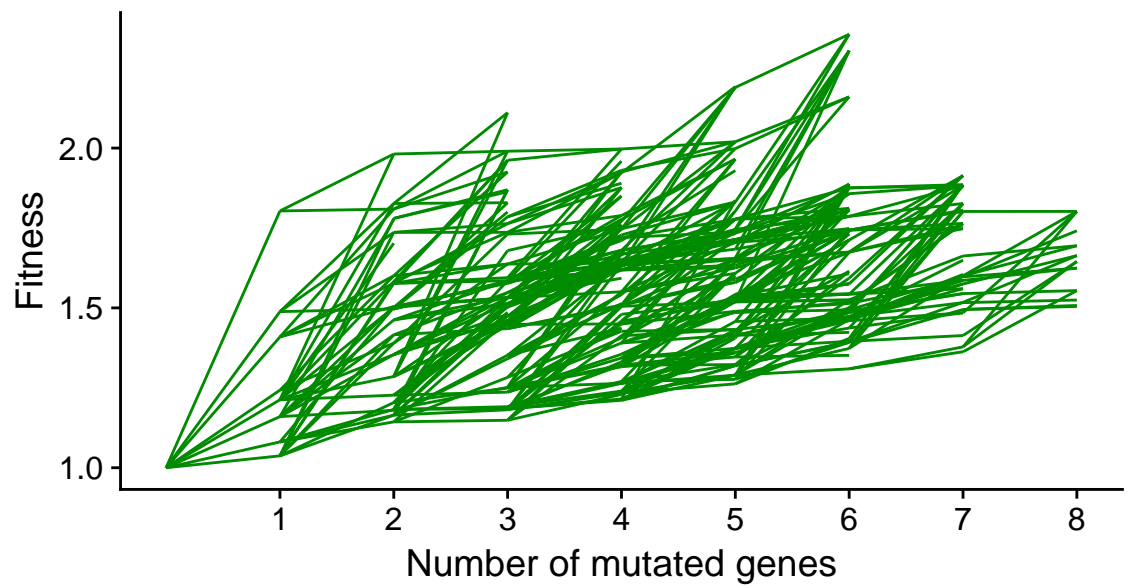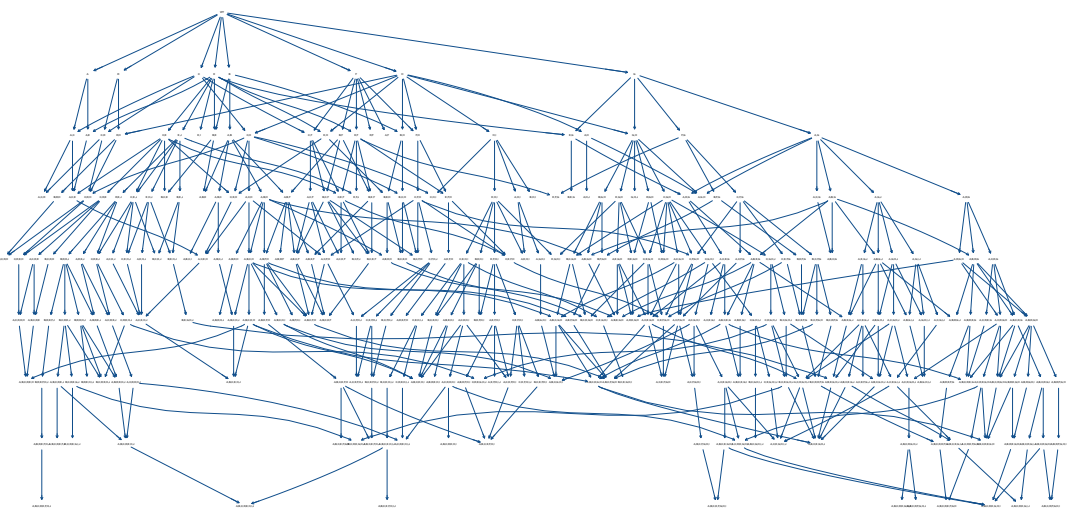



*ID* MkpqetXw6W2muojH  
*acc genotypes* 264  
*peaks no back* 74  
*removed edges* NA  
*prop rem edges* NA

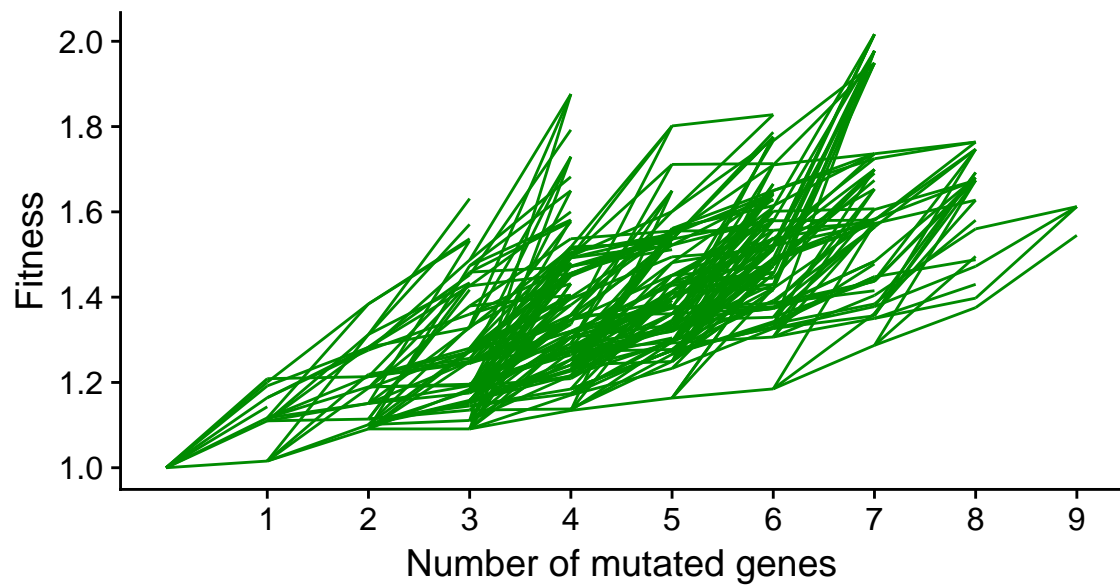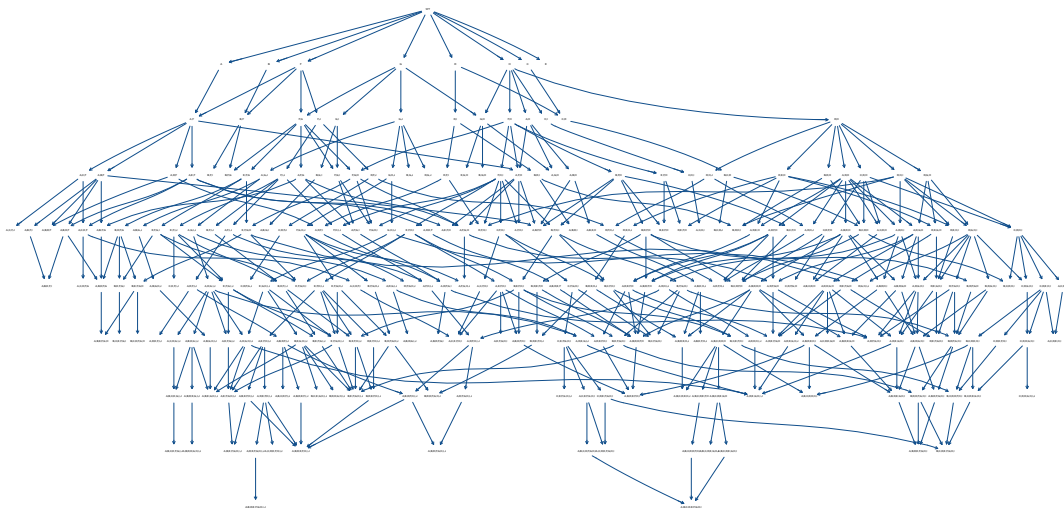

ID **mLM7OEw142104scrX**  
 acc genotypes **107**  
 peaks no back **42**  
 removed edges **NA**  
 prop rem edges **NA**

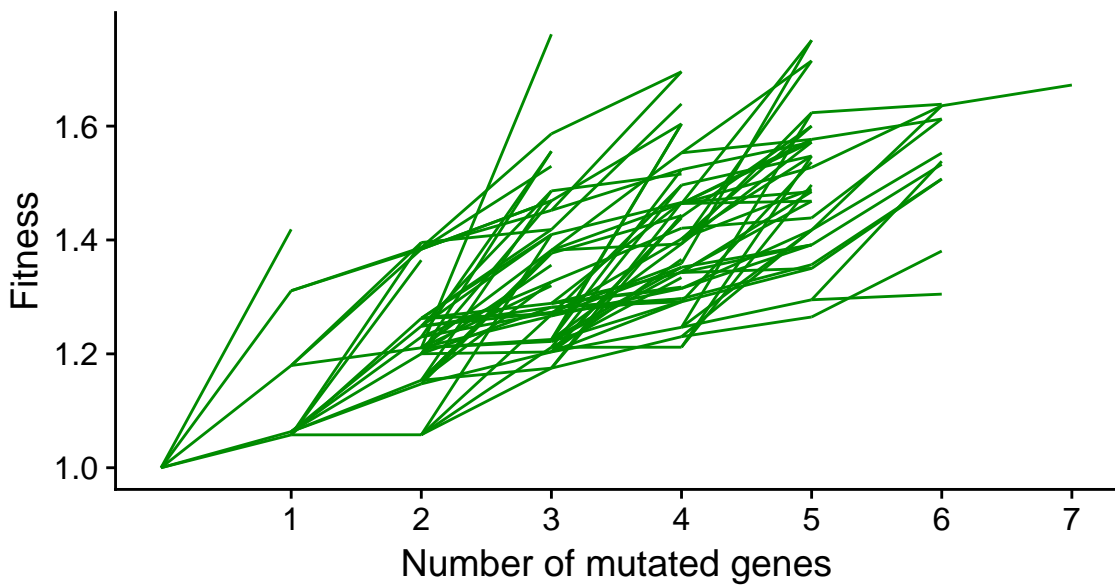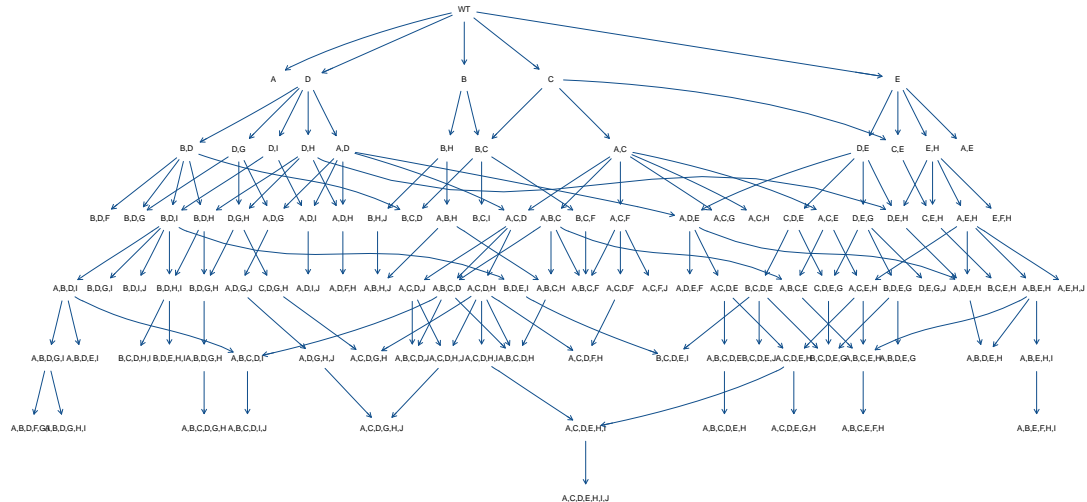

ID **mqC38cuoz4YoXqrC**  
 acc genotypes **214**  
 peaks no back **74**  
 removed edges **NA**  
 prop rem edges **NA**

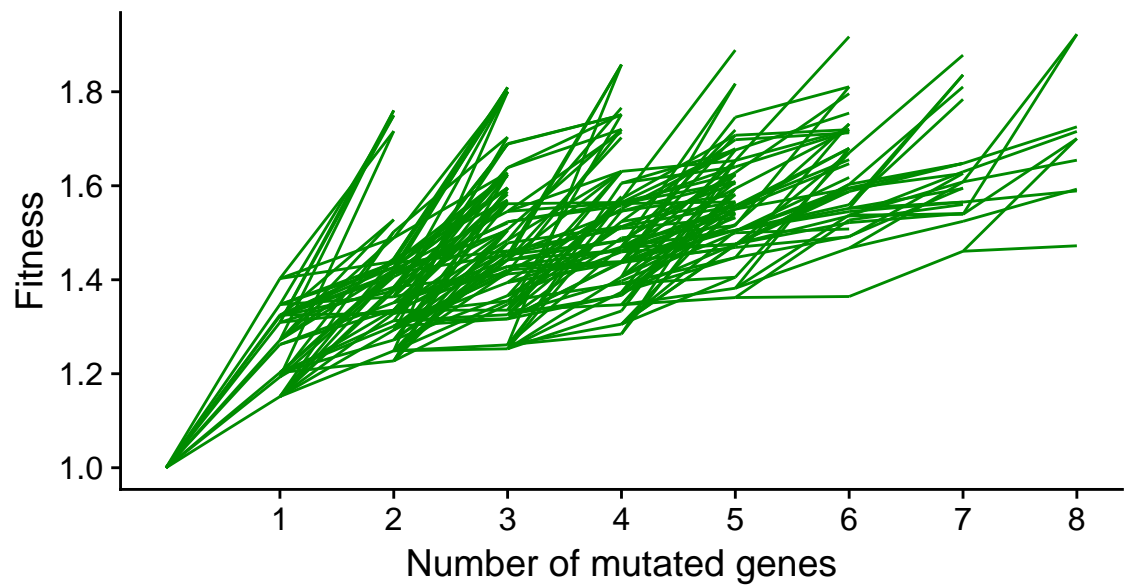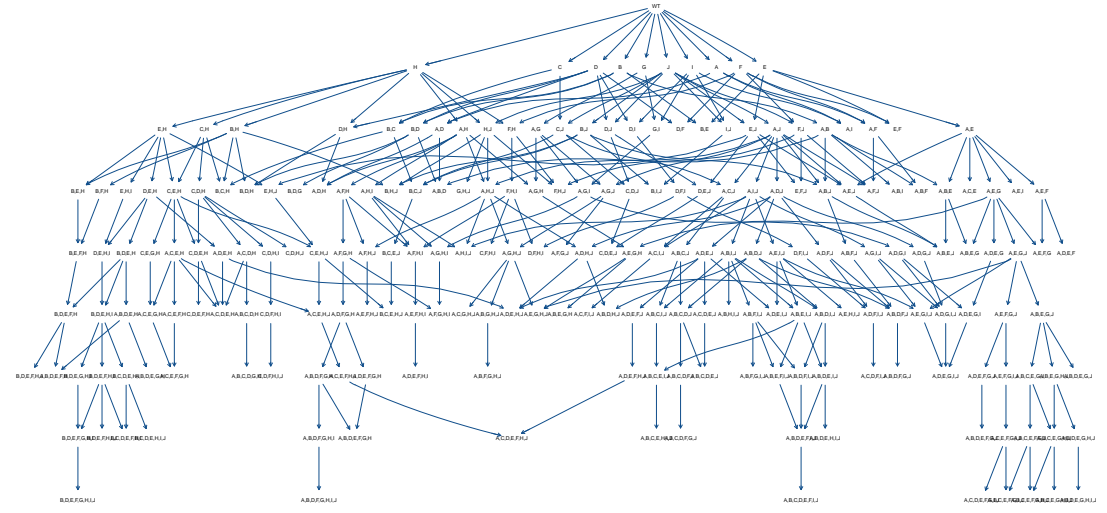

*ID* MtpPxzteweNel6dl  
*acc genotypes* 295  
*peaks no back* 63  
*removed edges* NA  
*prop rem edges* NA

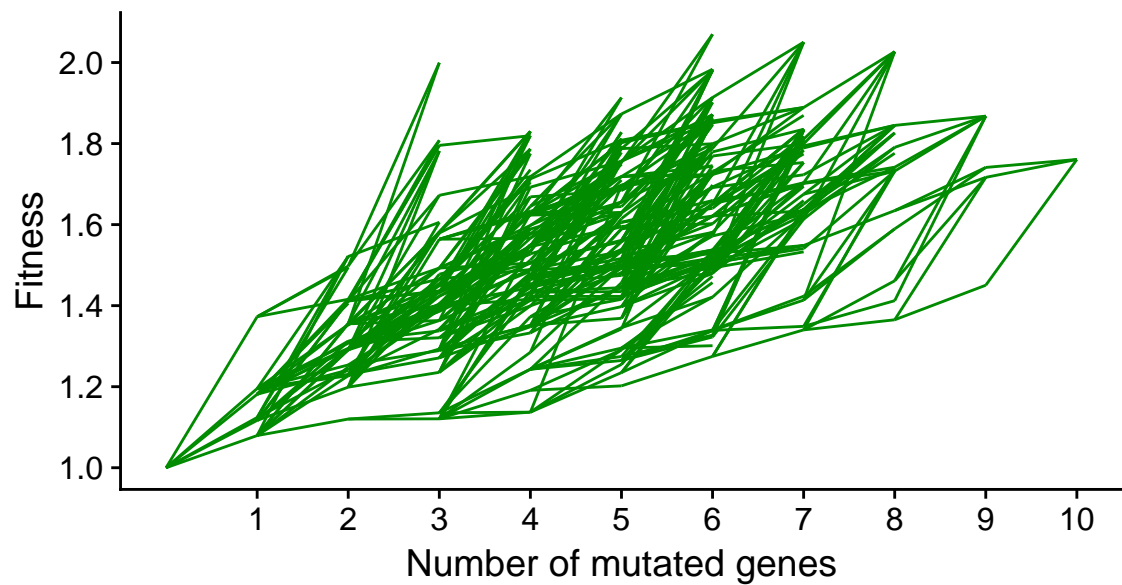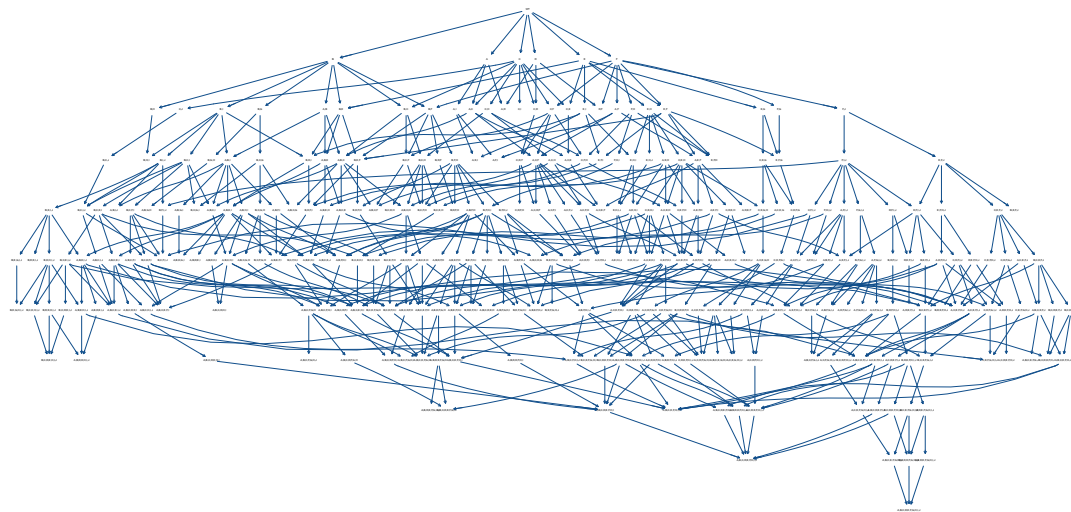

*ID* mYuH5XdoLHUkC10ay  
*acc genotypes* 440  
*peaks no back* 88  
*removed edges* NA  
*prop rem edges* NA

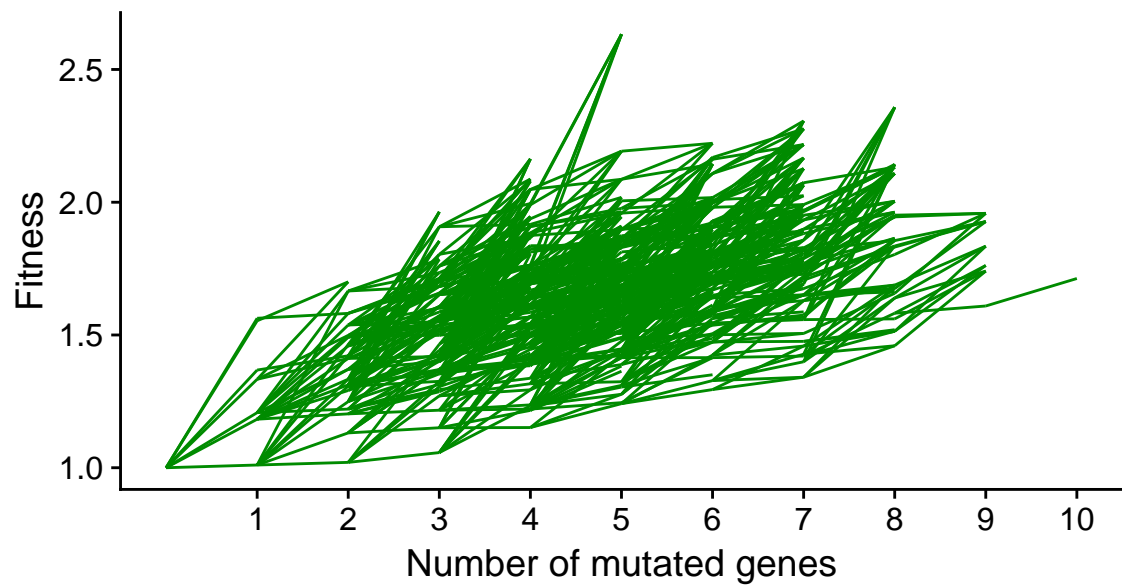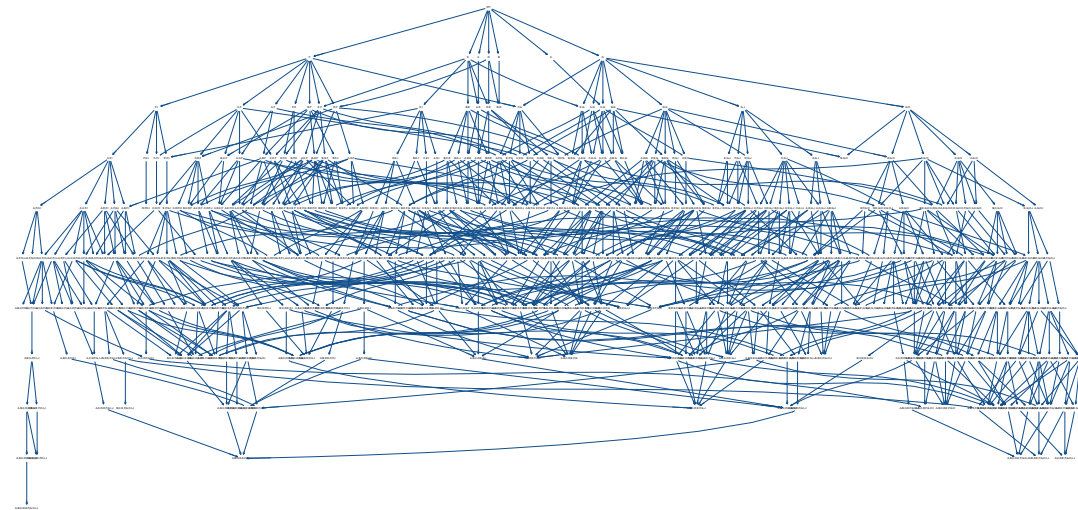

*ID* n10oyDkkU10F10uiAs3  
*acc genotypes* 228  
*peaks no back* 73  
*removed edges* NA  
*prop rem edges* NA

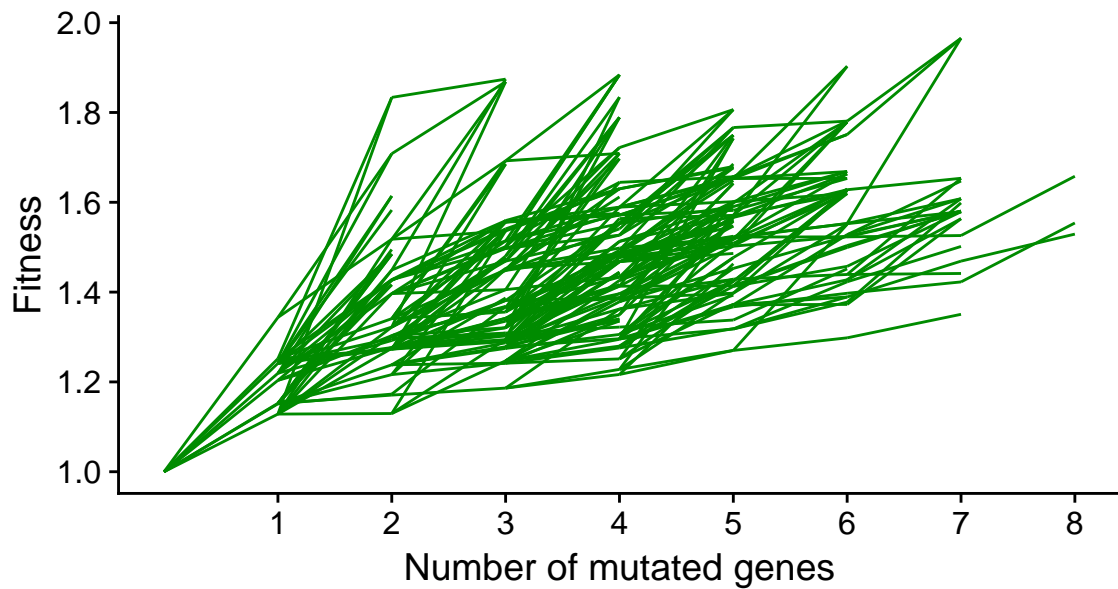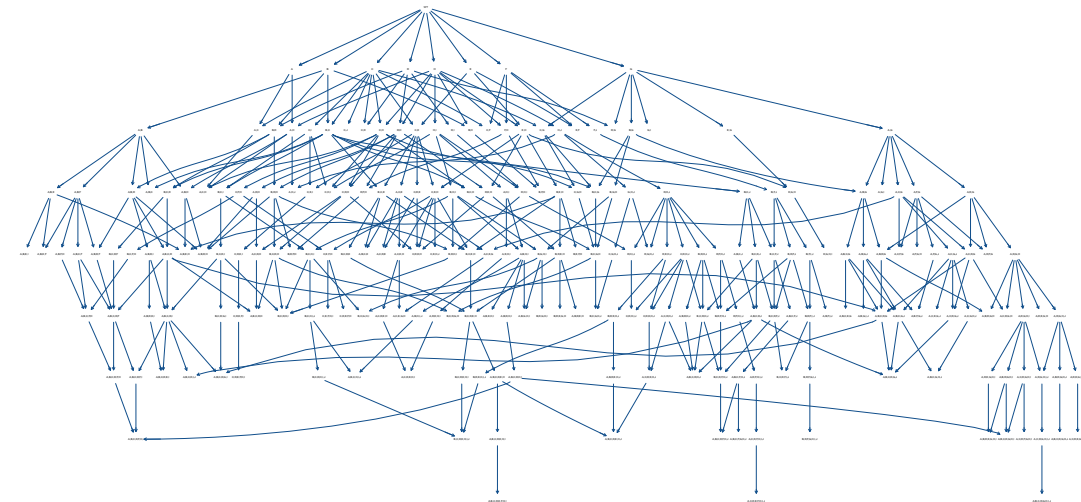

ID Na1044Pj2RIHKS16  
 acc genotypes 30  
 peaks no back 13  
 removed edges NA  
 prop rem edges NA

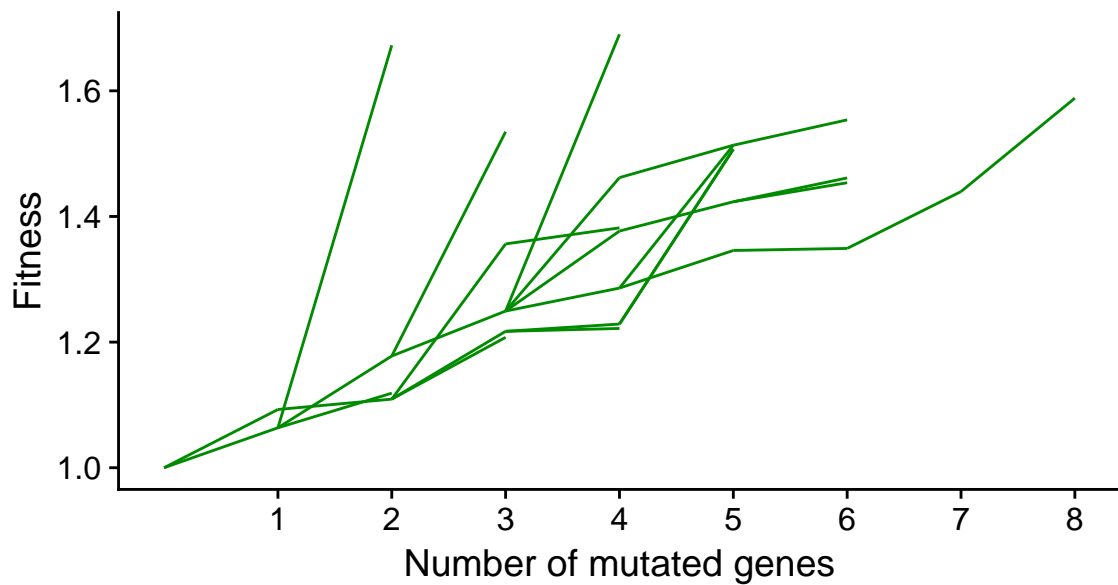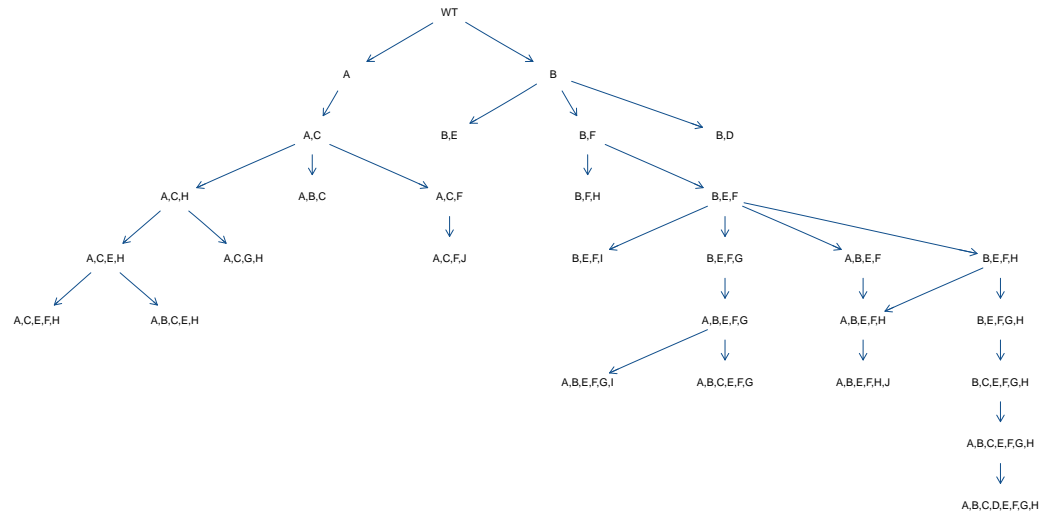

ID Nckkjp8YxmOBjLn  
 acc genotypes 176  
 peaks no back 45  
 removed edges NA  
 prop rem edges NA

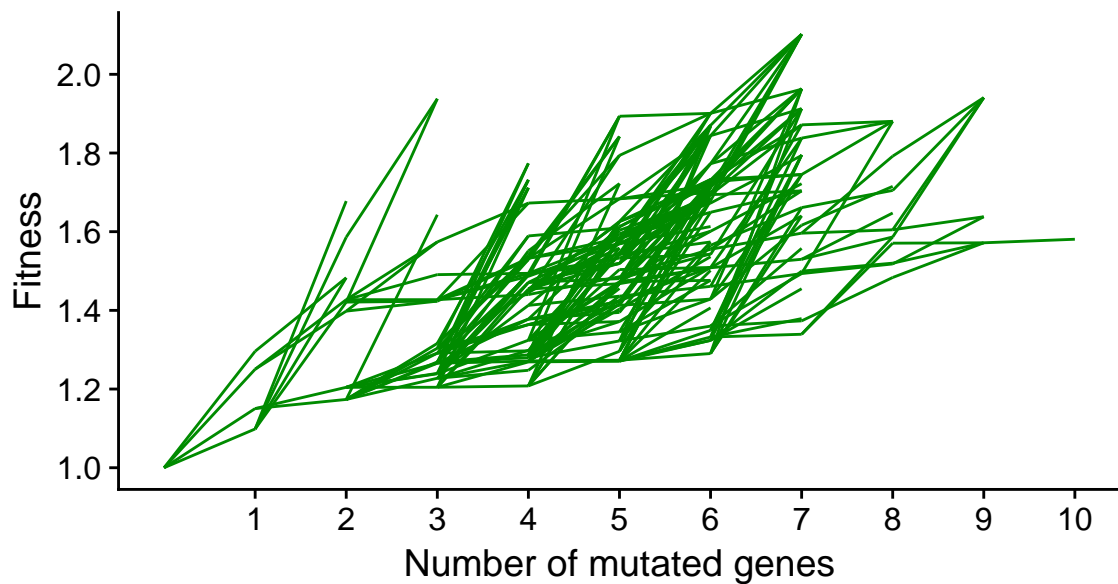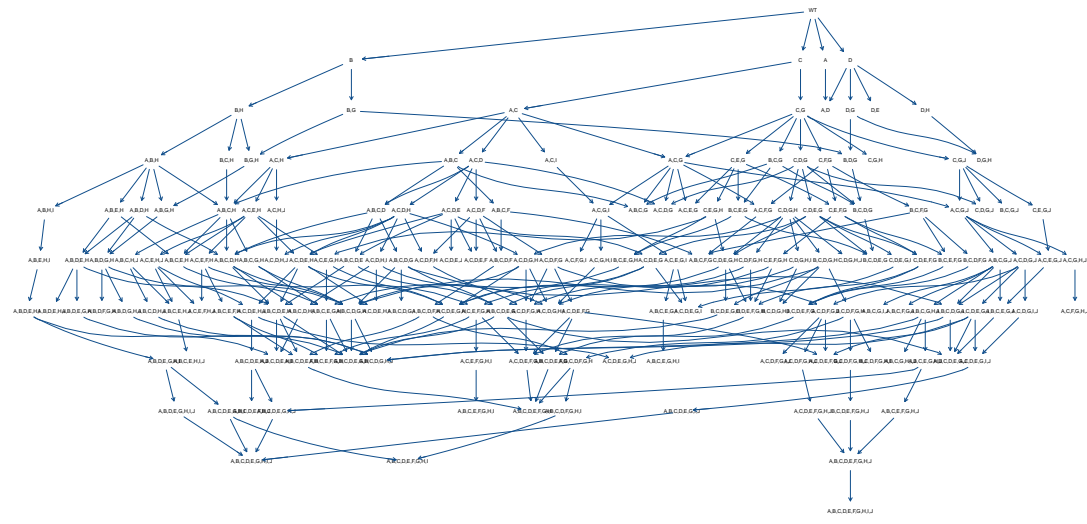



*ID* nFFAJ57LcDAfooEJ  
*acc genotypes* 537  
*peaks no back* 73  
*removed edges* NA  
*prop rem edges* NA

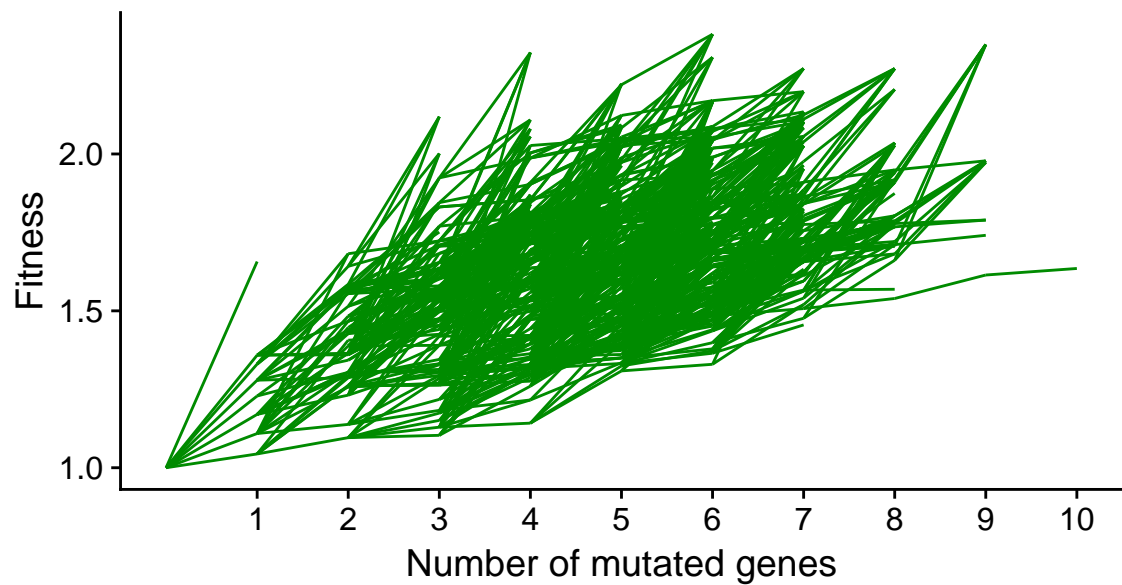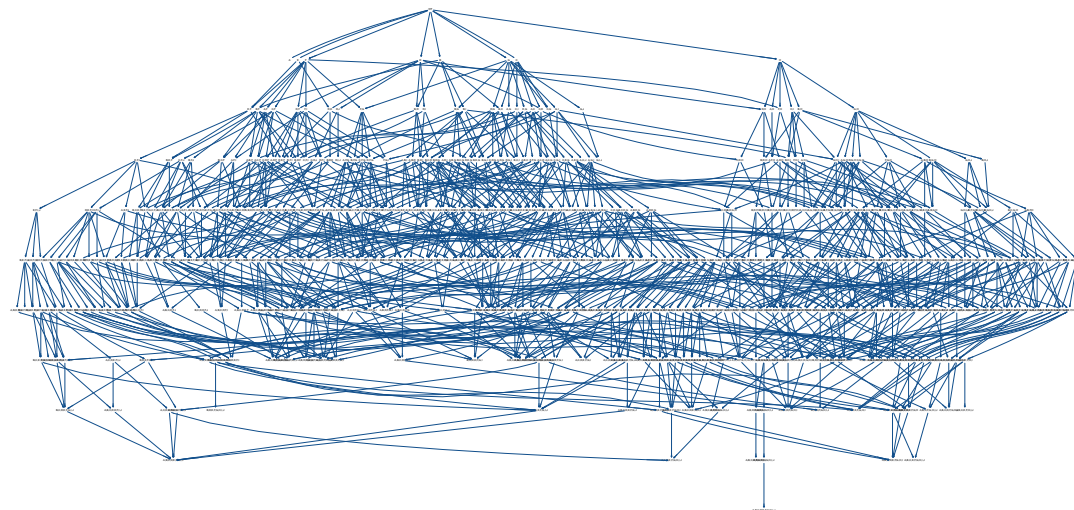

ID nFGvQLr121eGqkyD  
 acc genotypes 138  
 peaks no back 51  
 removed edges NA  
 prop rem edges NA

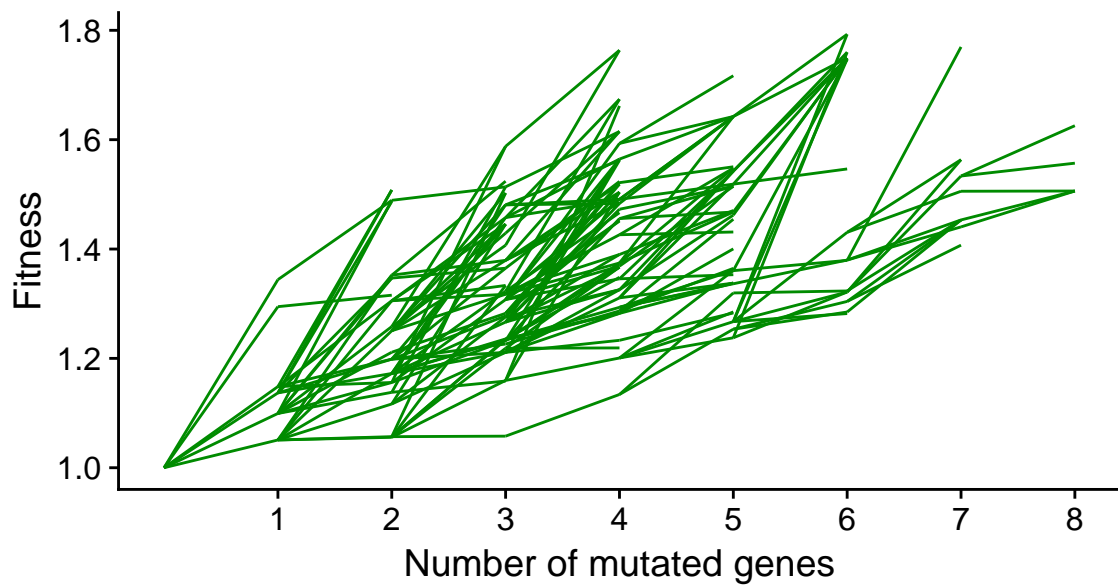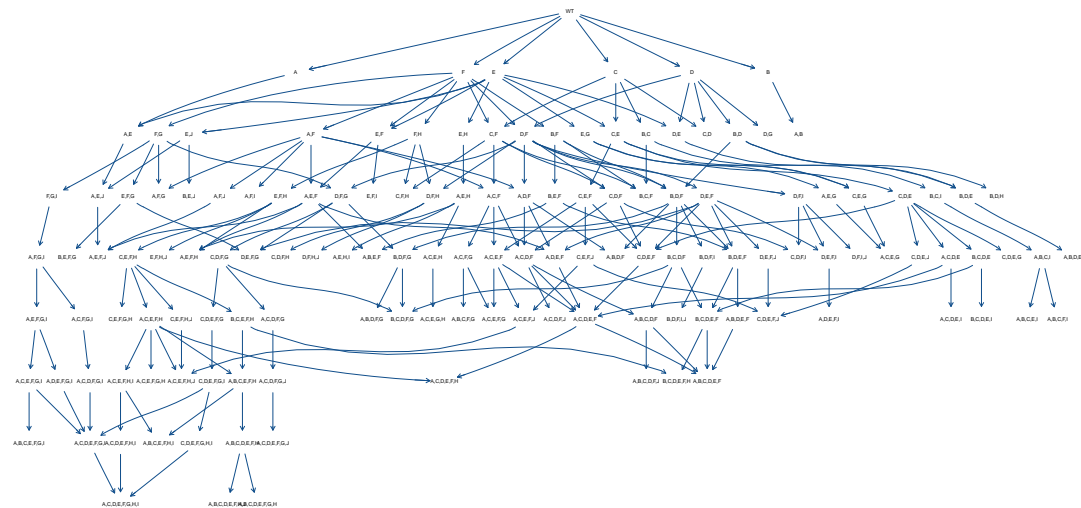

*ID* OcPH3CcYp51kr5sW  
*acc genotypes* 541  
*peaks no back* 62  
*removed edges* NA  
*prop rem edges* NA

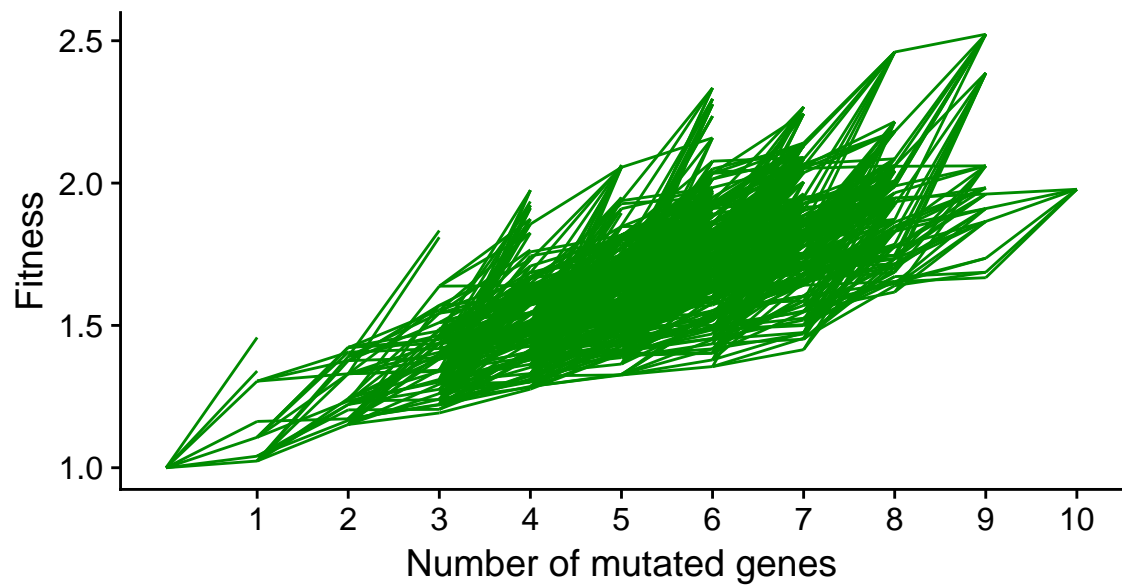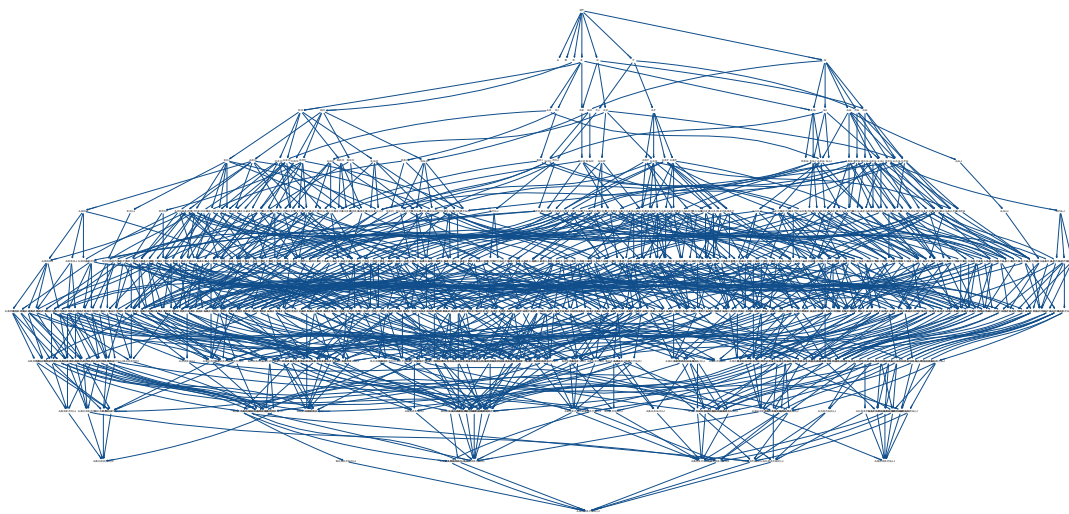

ID **OGxF8Oyy15NLRVHt**  
 acc genotypes **147**  
 peaks no back 63  
 removed edges NA  
 prop rem edges NA

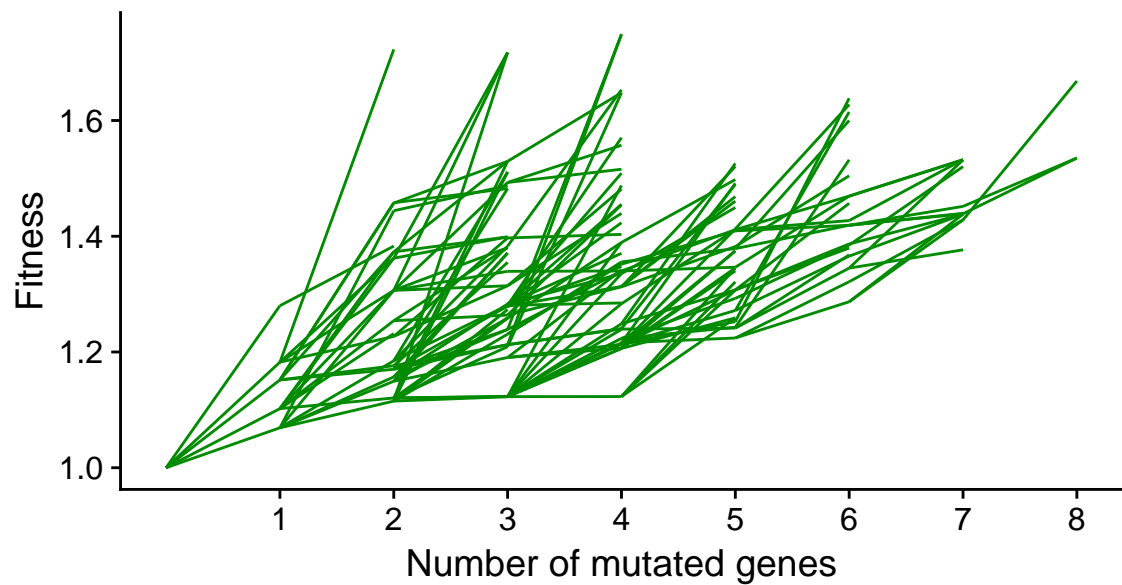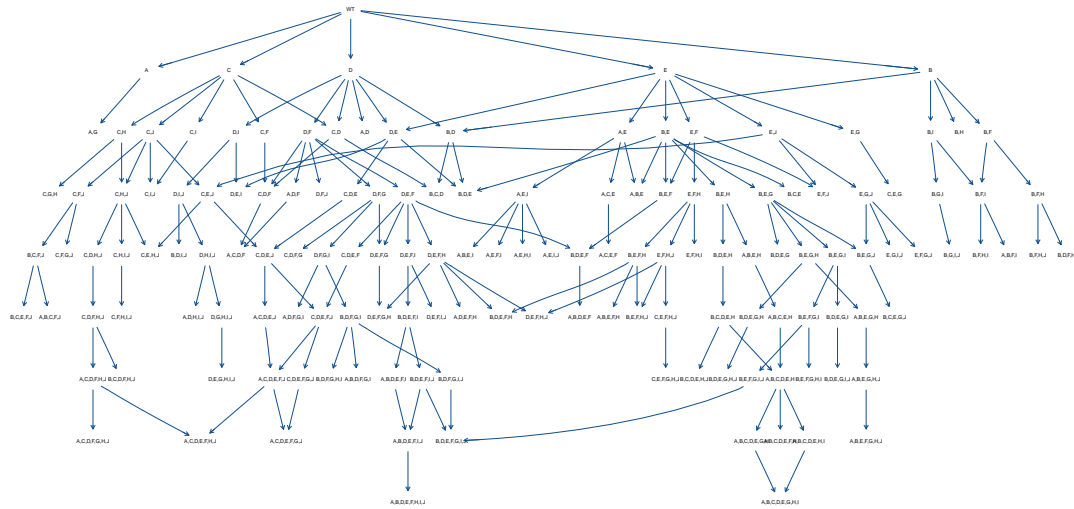

*ID* Oh105Ra4cDXvsigOA  
*acc genotypes* 468  
*peaks no back* 63  
*removed edges* NA  
*prop rem edges* NA

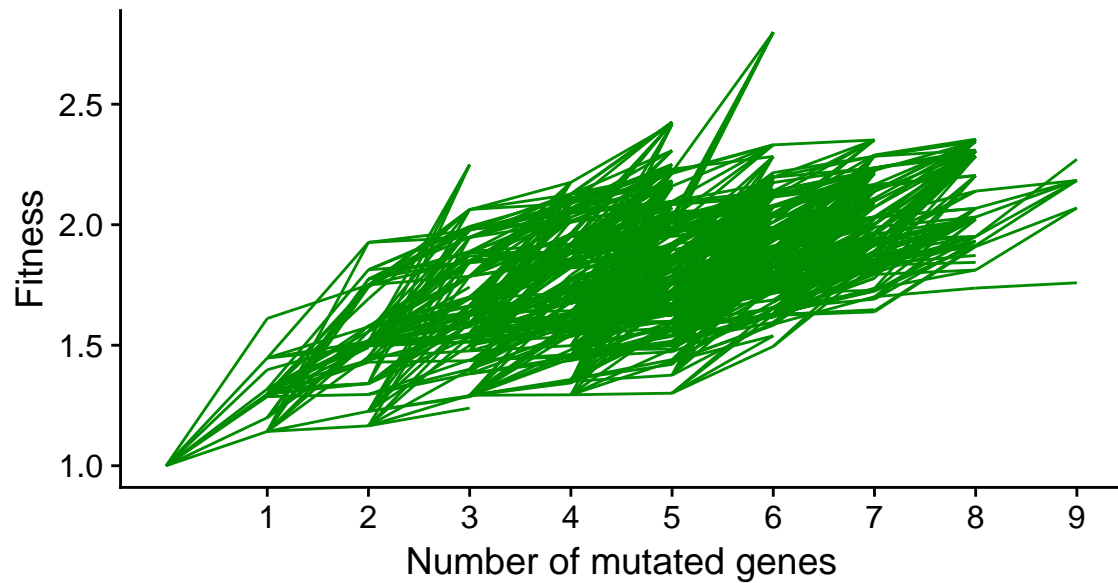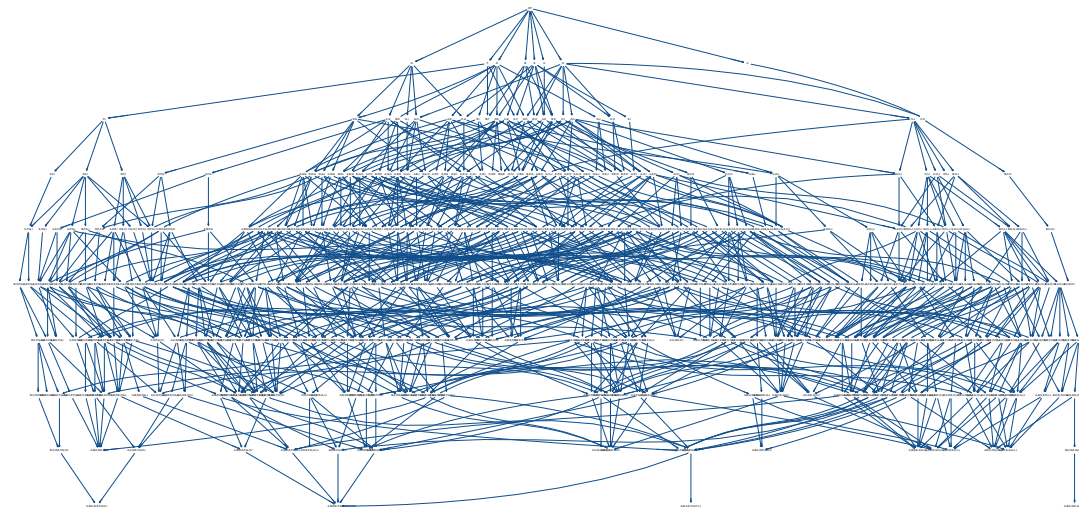

ID Oj6oyBsD3bxROStD  
 acc genotypes 134  
 peaks no back 54  
 removed edges NA  
 prop rem edges NA

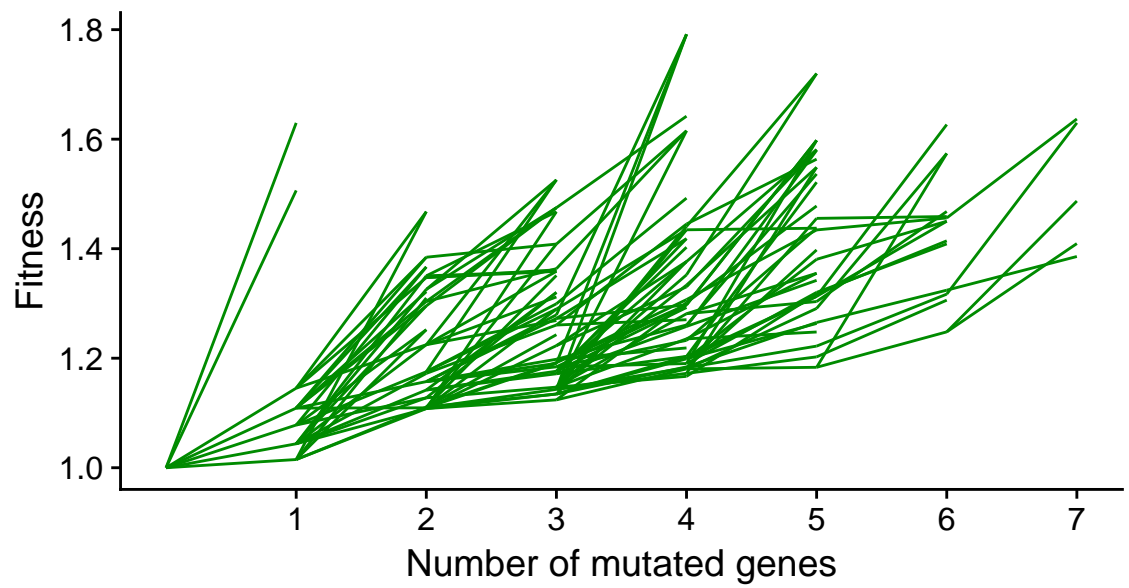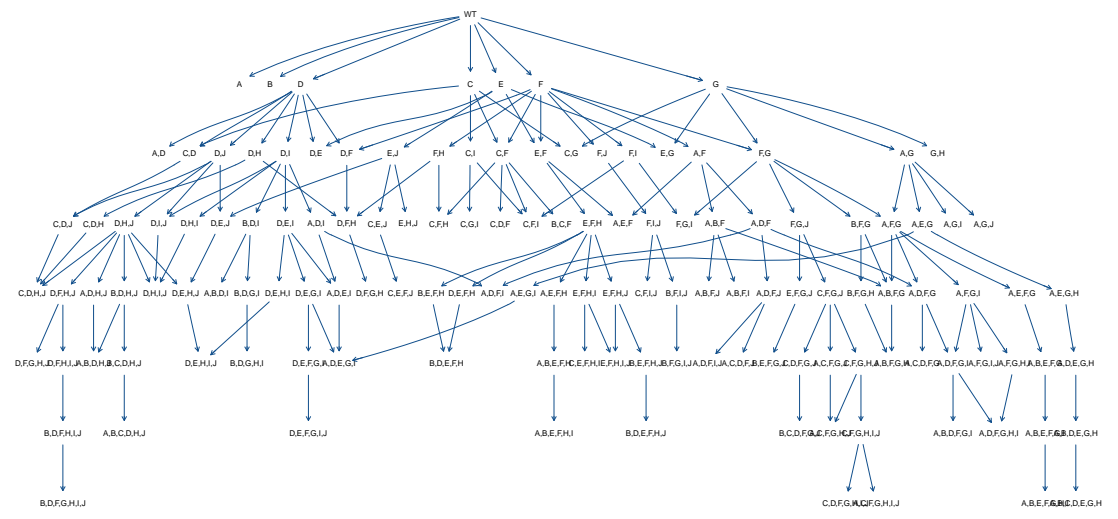

ID Oyrh4S6yqbCq9BE1  
 acc genotypes 84  
 peaks no back 37  
 removed edges NA  
 prop rem edges NA

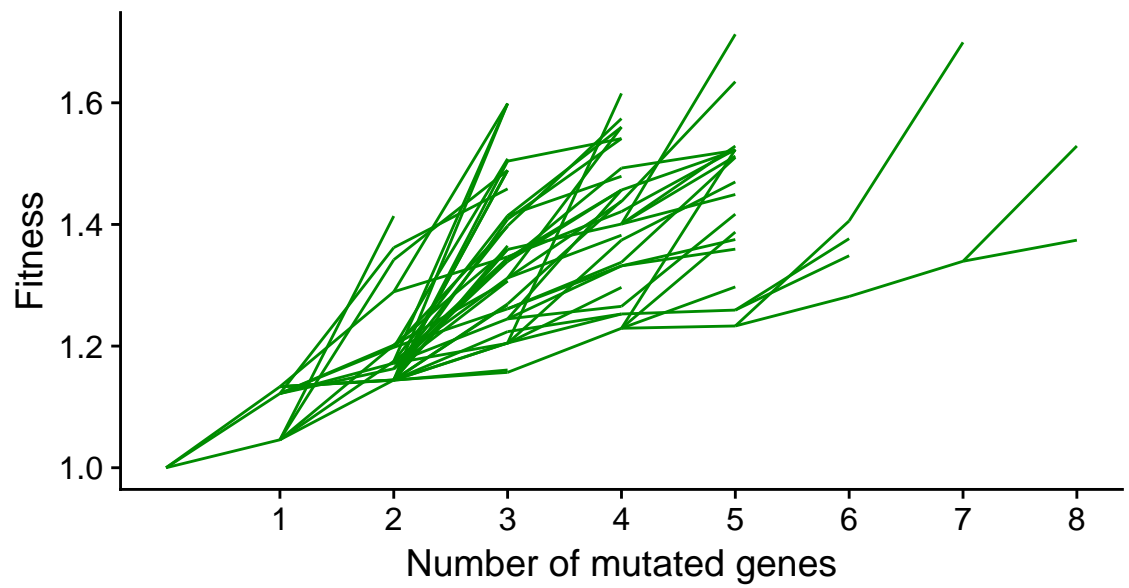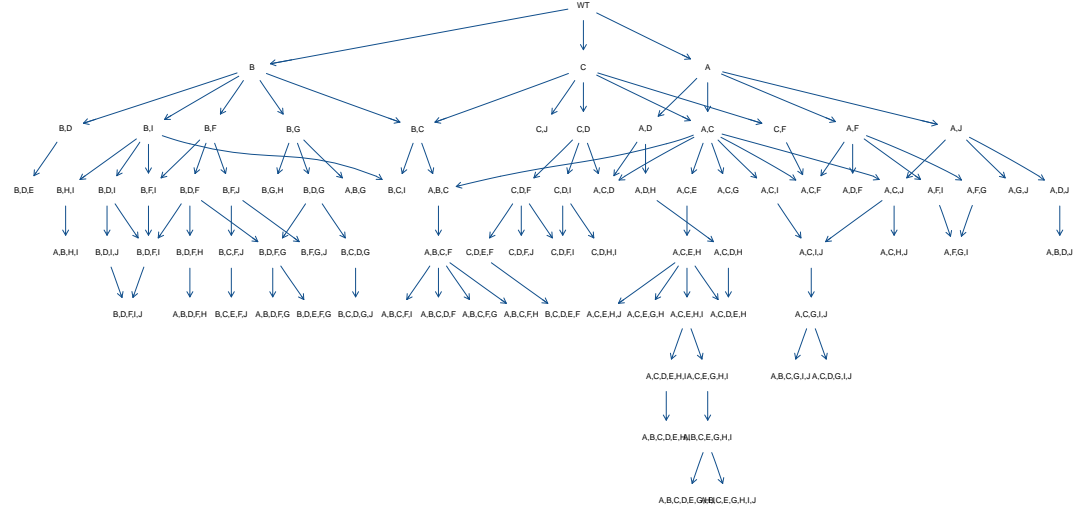

ID p2Hy10RKJmoyhCKd10  
 acc genotypes 140  
 peaks no back 50  
 removed edges NA  
 prop rem edges NA

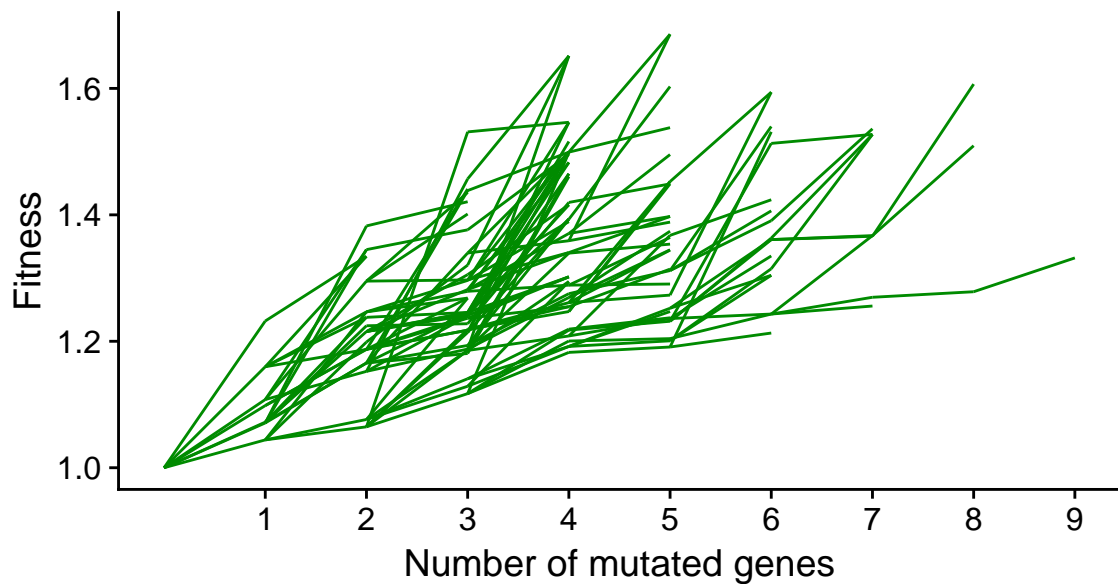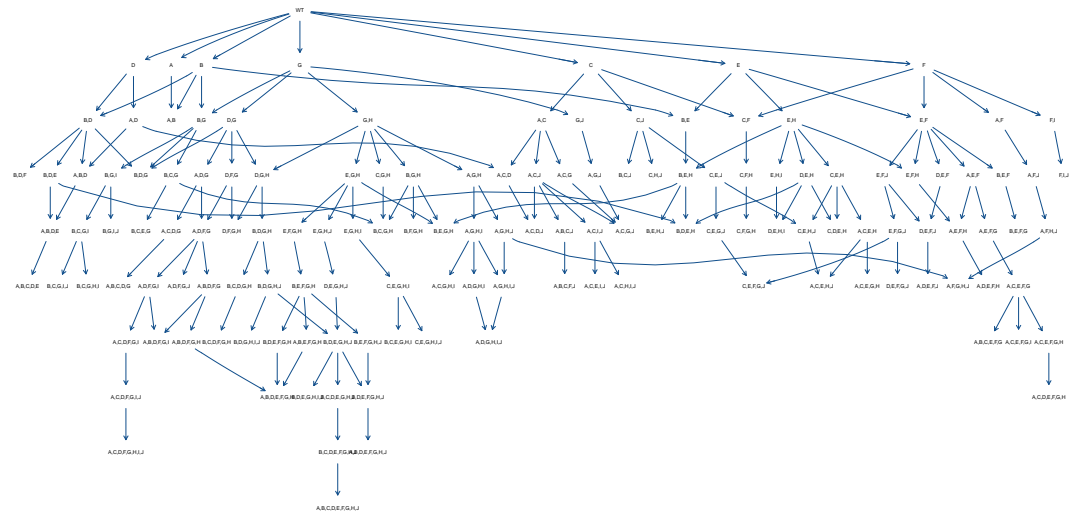



*ID* pcFmFiSb1dmNWs7Q  
*acc genotypes* 333  
*peaks no back* 105  
*removed edges* NA  
*prop rem edges* NA

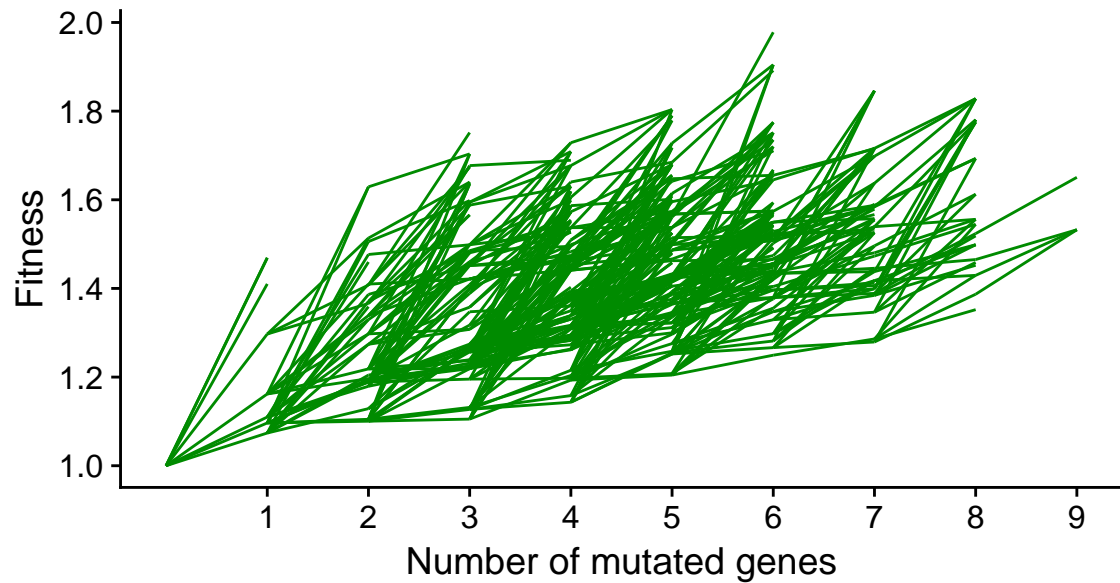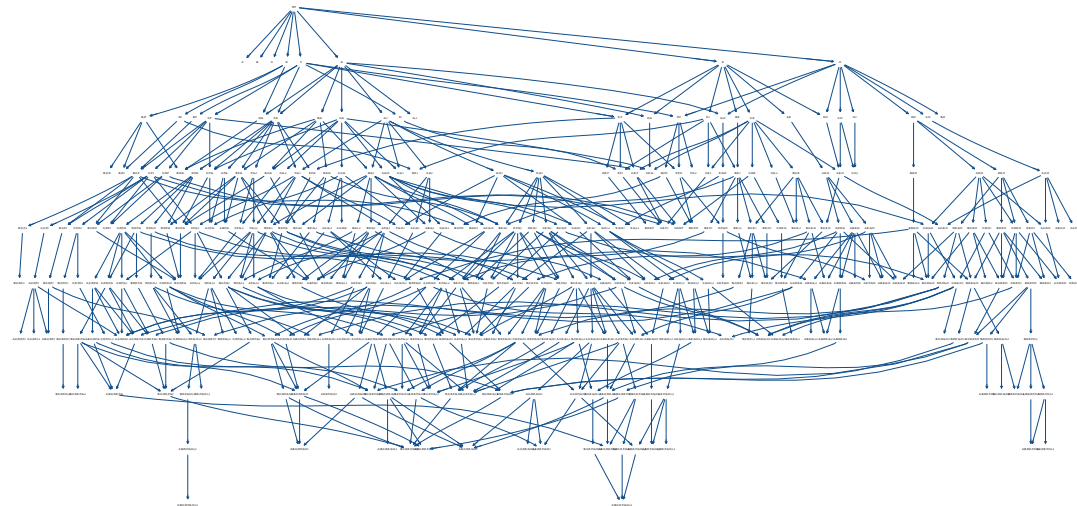

*ID* pF515adN8ZsnzdgE  
*acc genotypes* 276  
*peaks no back* 100  
*removed edges* NA  
*prop rem edges* NA

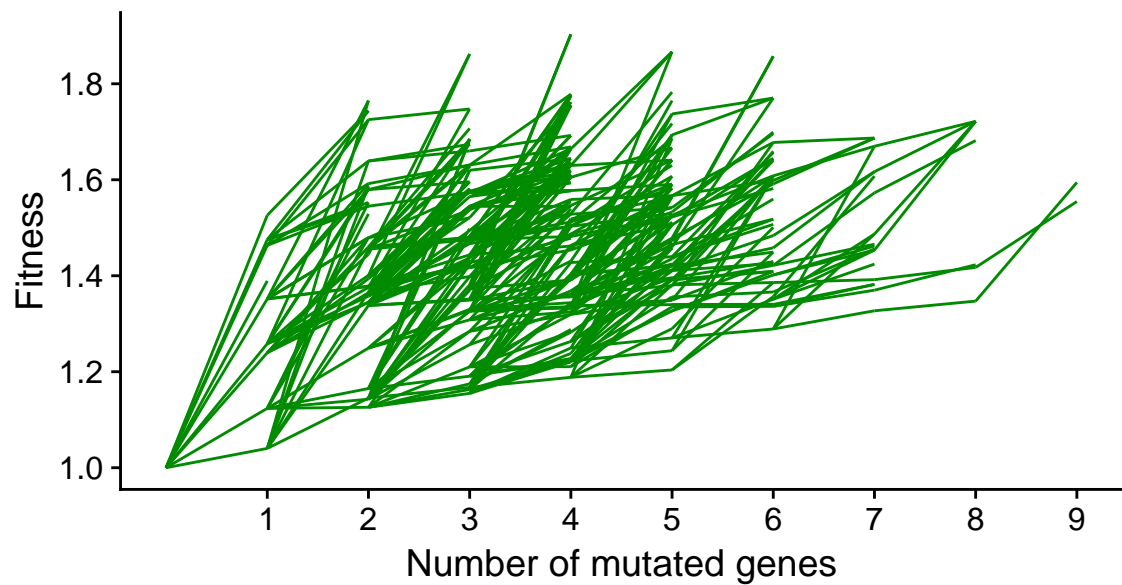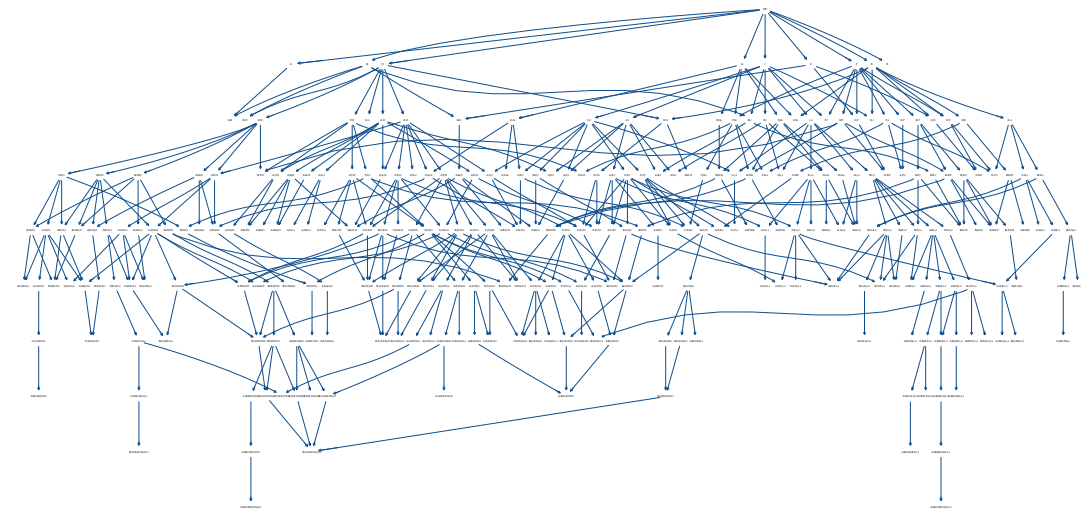

ID Pje92ruf6BDq1QiQ  
 acc genotypes 111  
 peaks no back 40  
 removed edges NA  
 prop rem edges NA

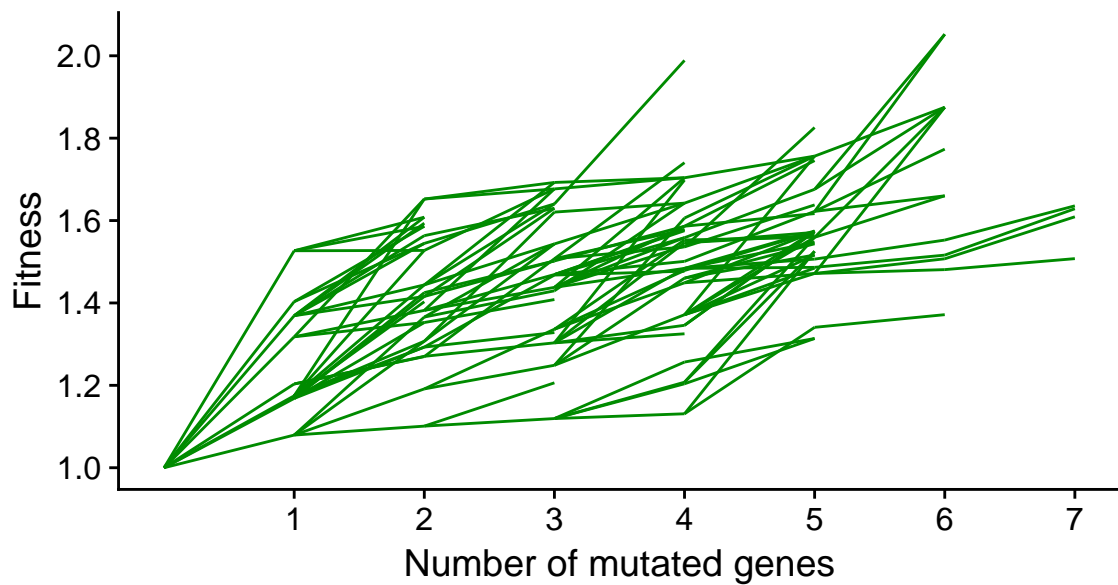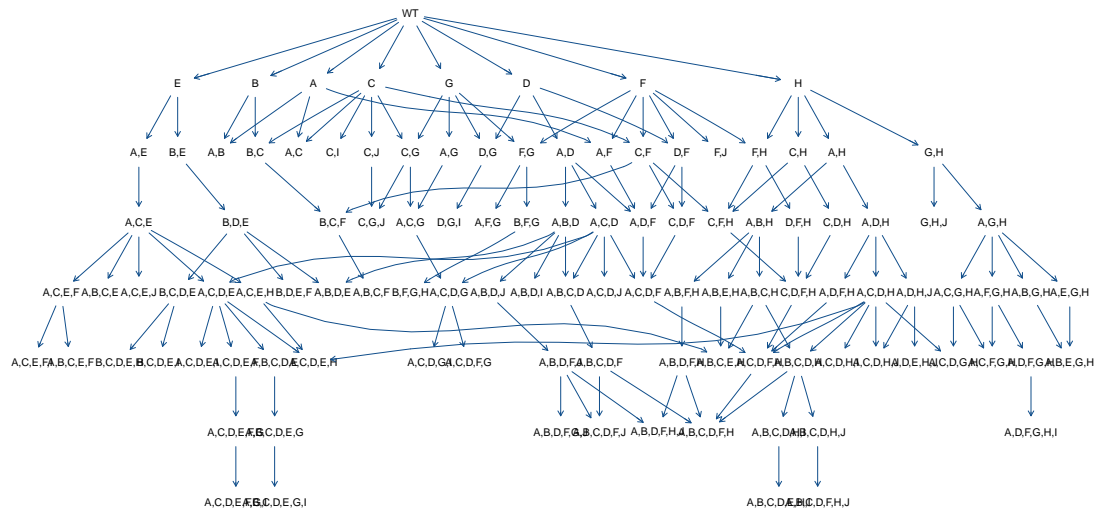

*ID* PmQfeqFvnFM6z8Uz  
*acc genotypes* 276  
*peaks no back* 75  
*removed edges* NA  
*prop rem edges* NA

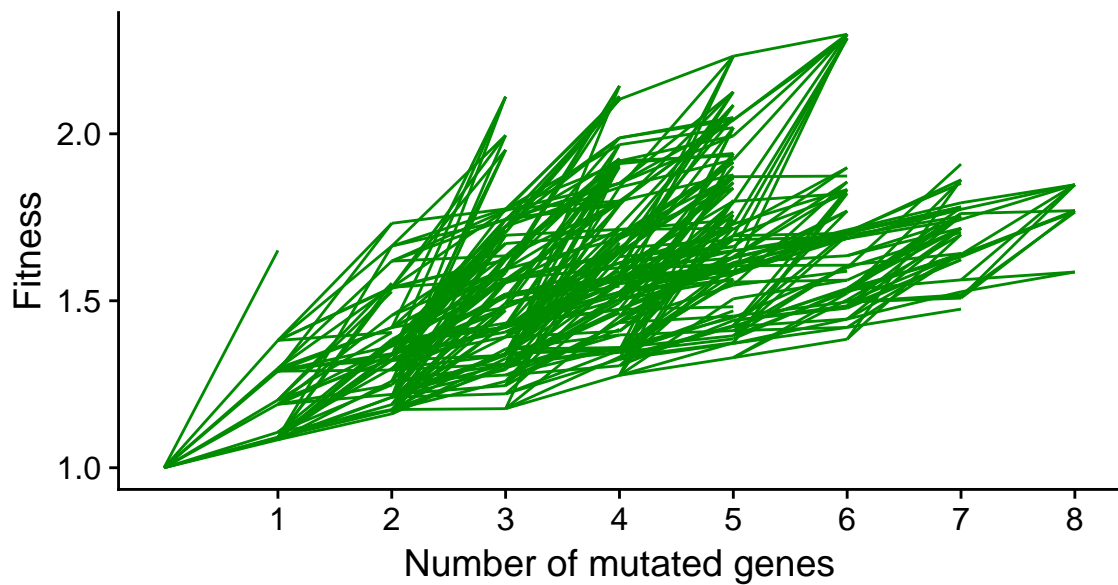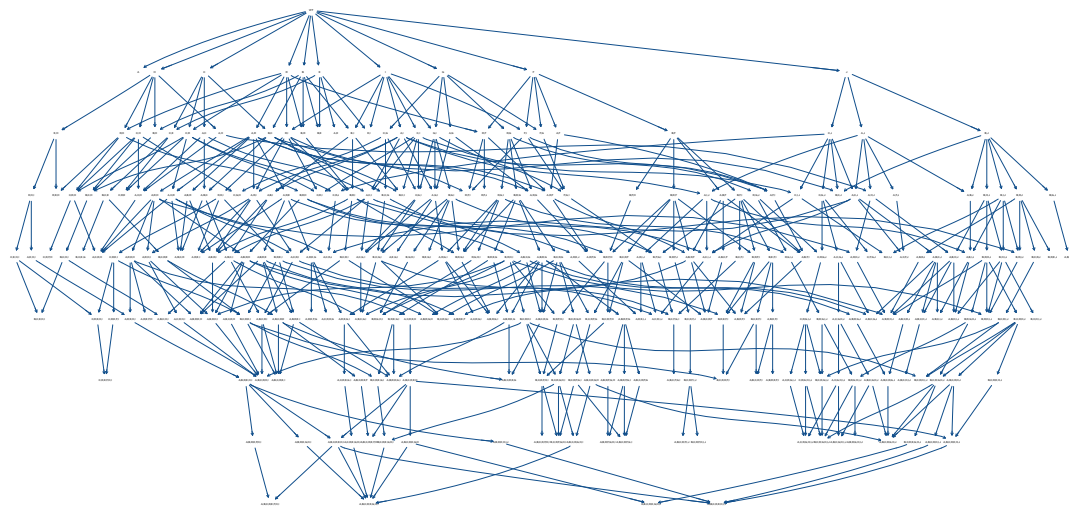

ID ppgKWX3qfEYrvpoe  
 acc genotypes 98  
 peaks no back 22  
 removed edges NA  
 prop rem edges NA

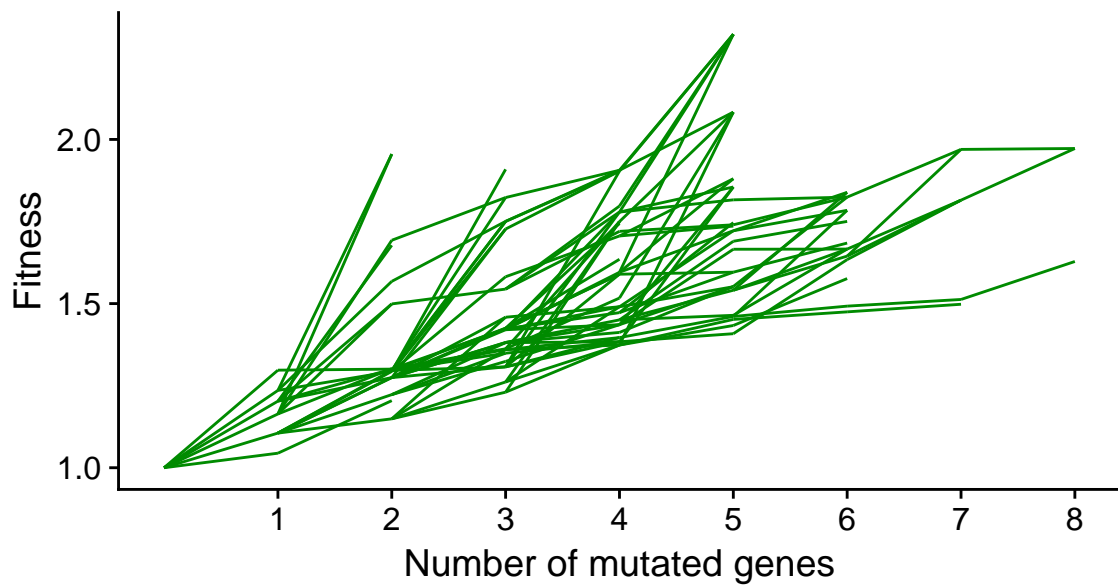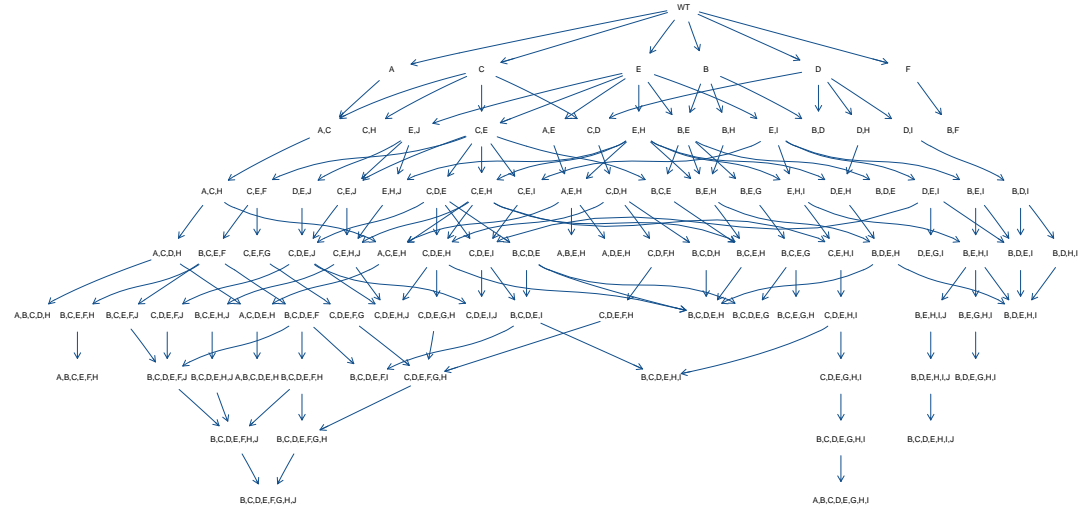

ID q6ESfEnjdJLQJKzP  
 acc genotypes 110  
 peaks no back 41  
 removed edges NA  
 prop rem edges NA

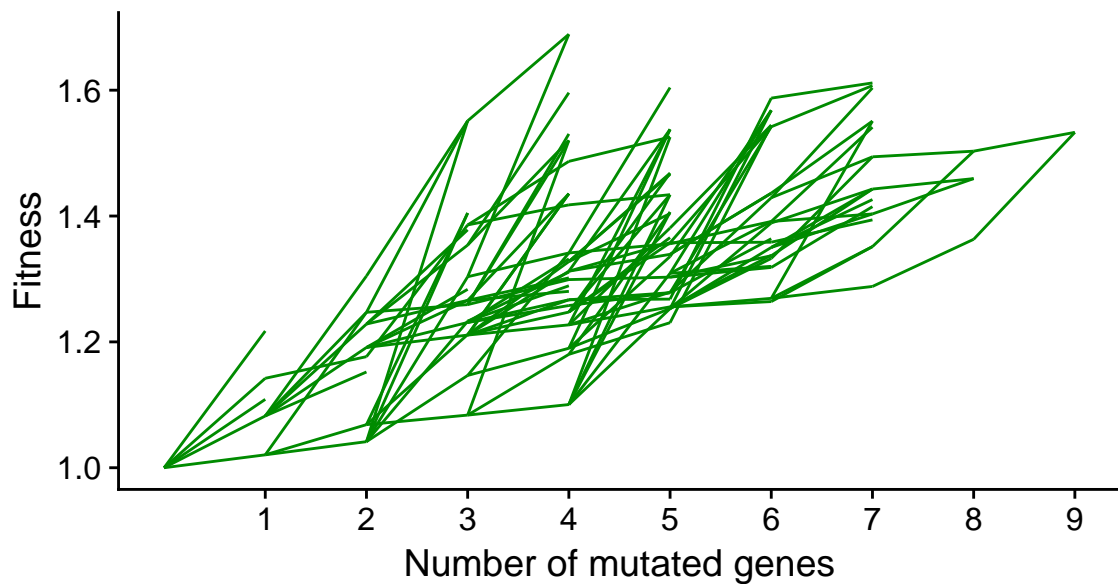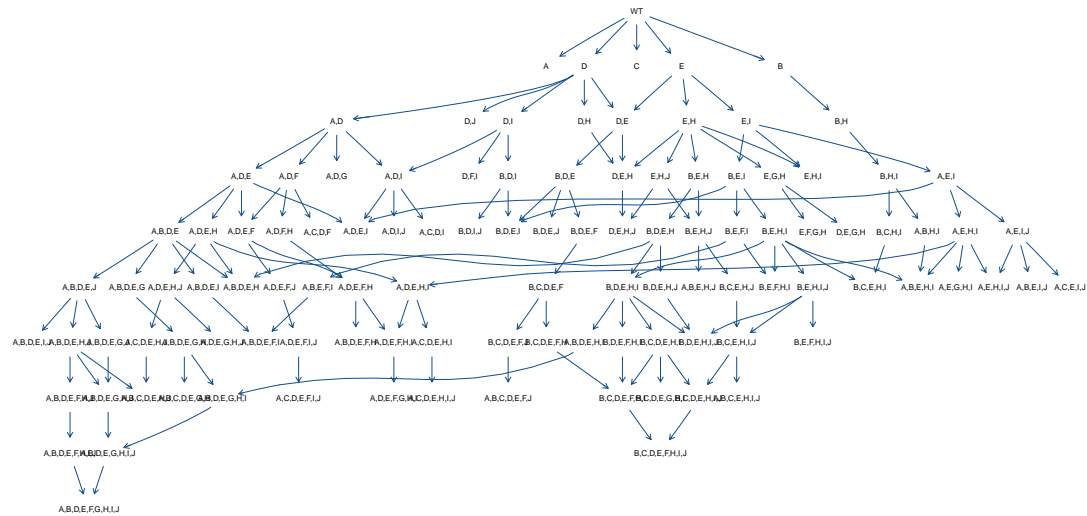

*ID* QDIfwYRc6C9mw910Q  
*acc genotypes* 251  
*peaks no back* 69  
*removed edges* NA  
*prop rem edges* NA

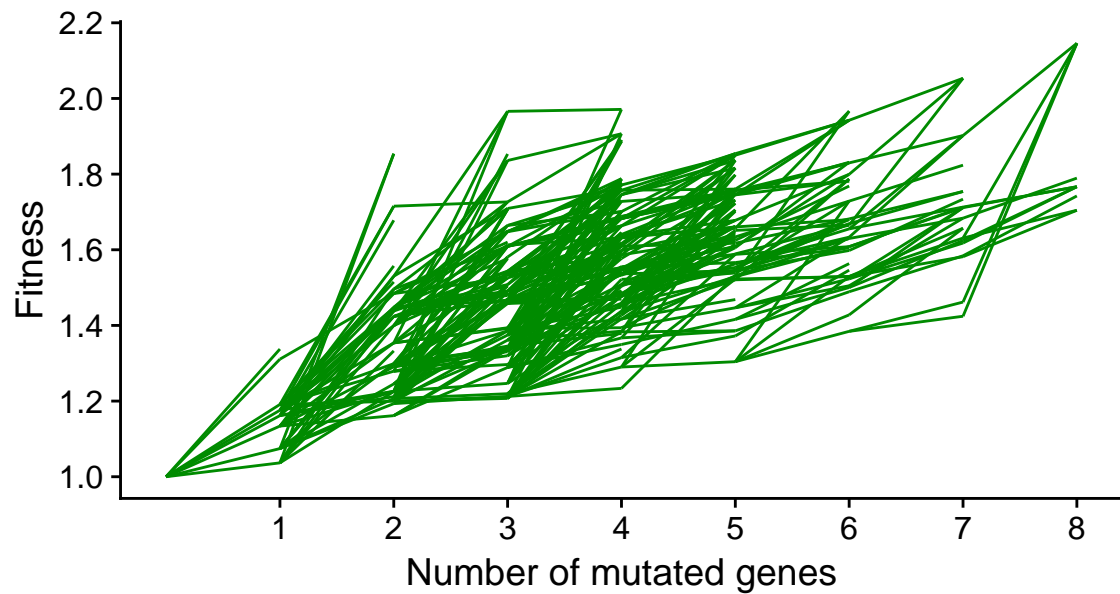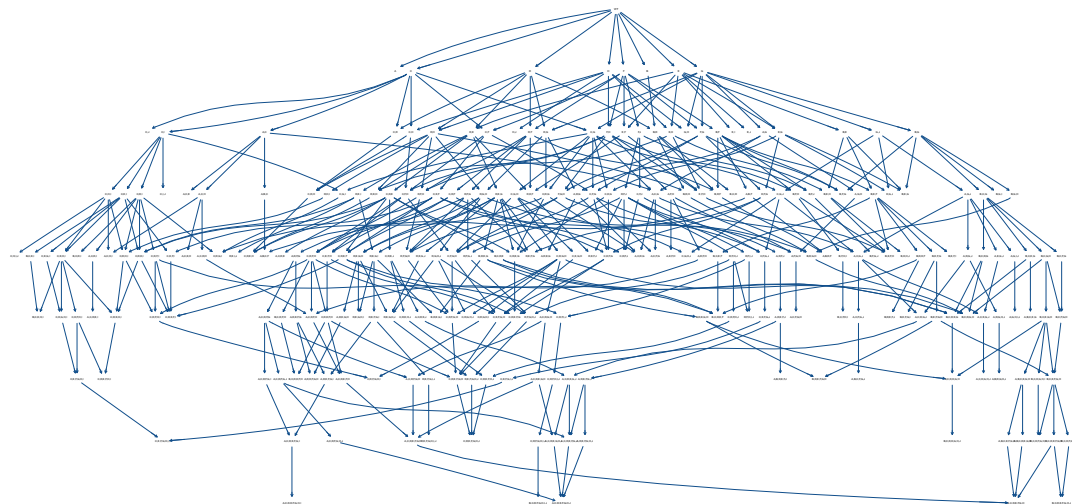

*ID* QDnBQv95LeMoDZkz  
*acc genotypes* 397  
*peaks no back* 113  
*removed edges* NA  
*prop rem edges* NA

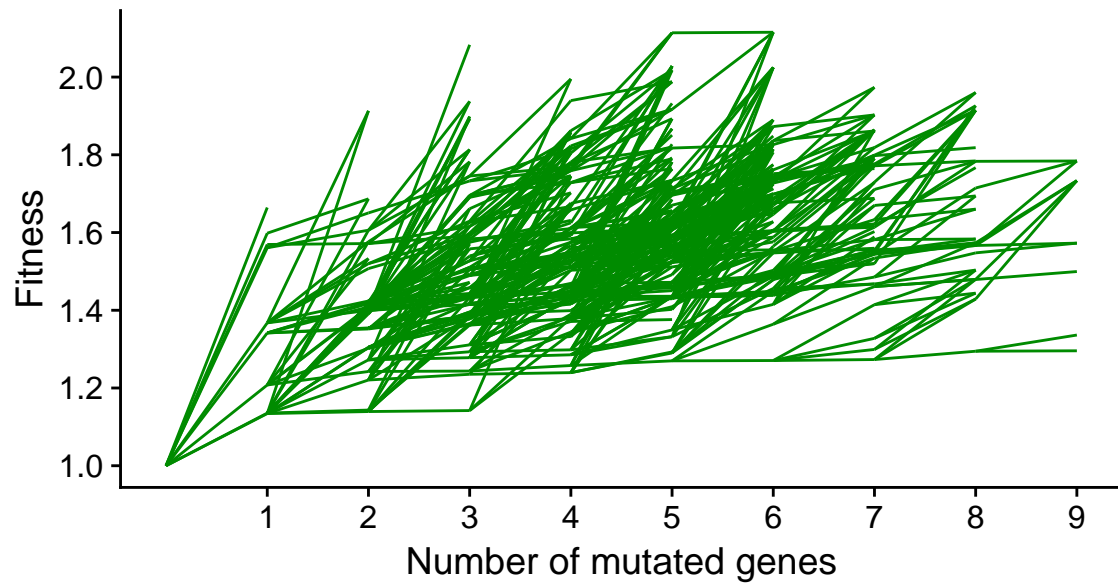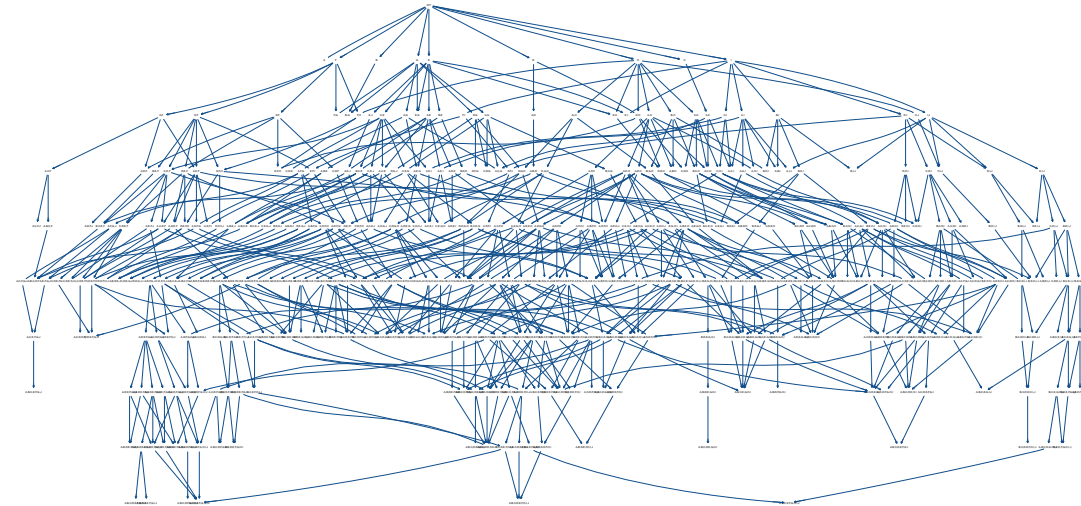



*ID* qhoM9EMECJiKAEai  
*acc genotypes* 301  
*peaks no back* 43  
*removed edges* NA  
*prop rem edges* NA

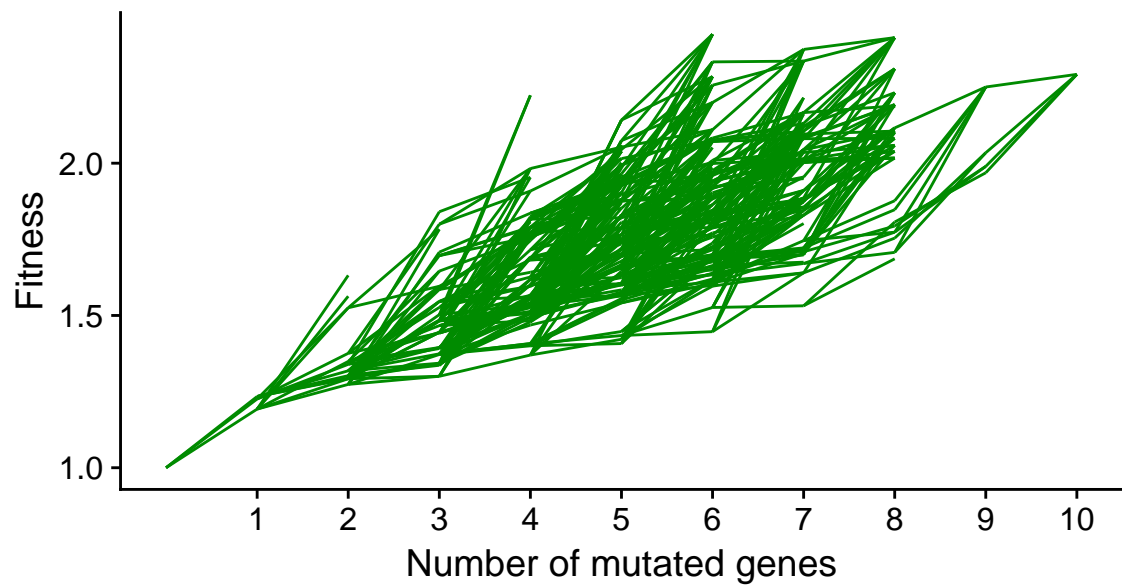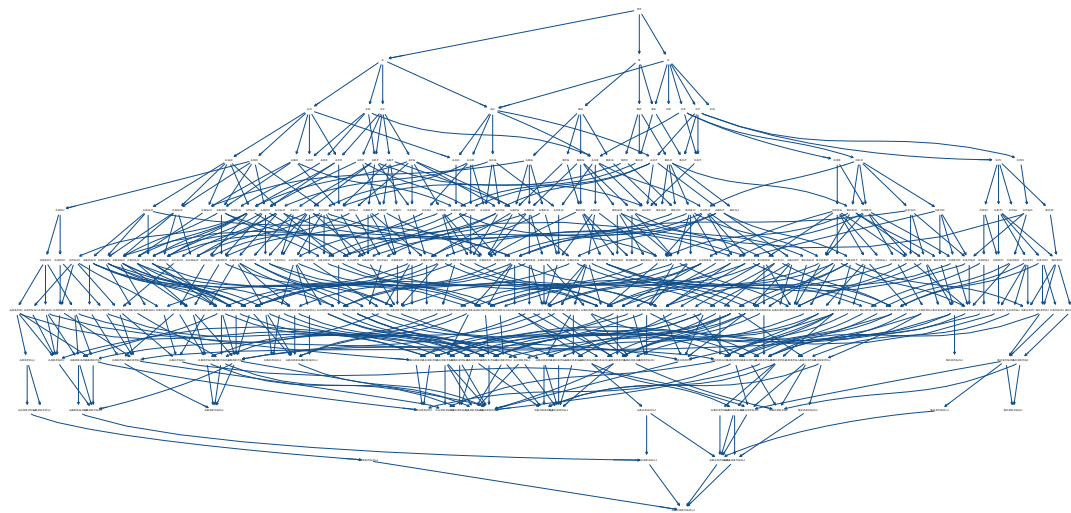

*ID* qIG3omWesEf8erJY  
*acc genotypes* 330  
*peaks no back* 79  
*removed edges* NA  
*prop rem edges* NA

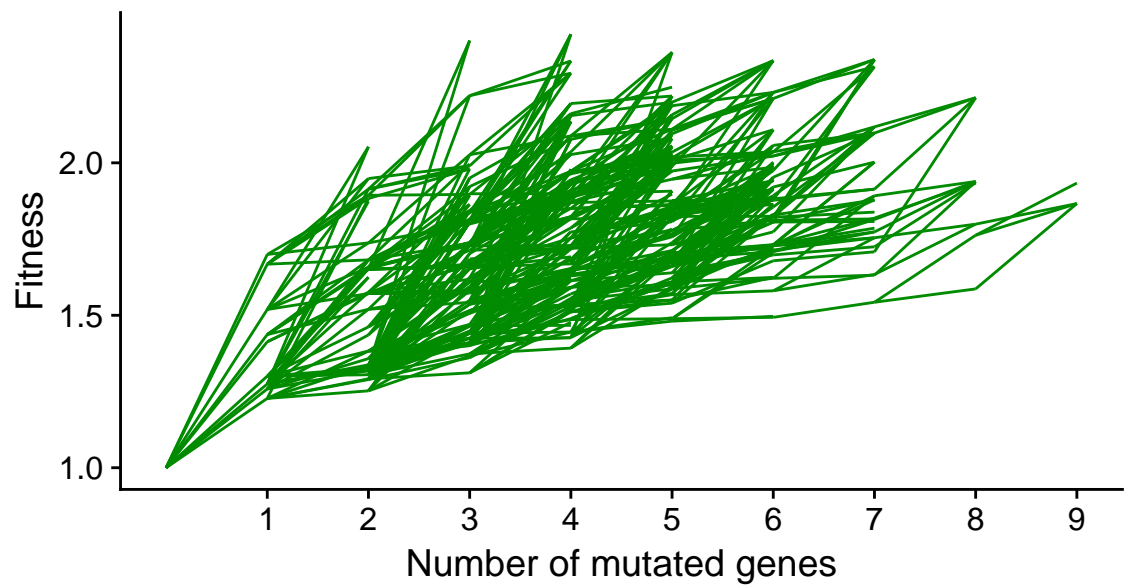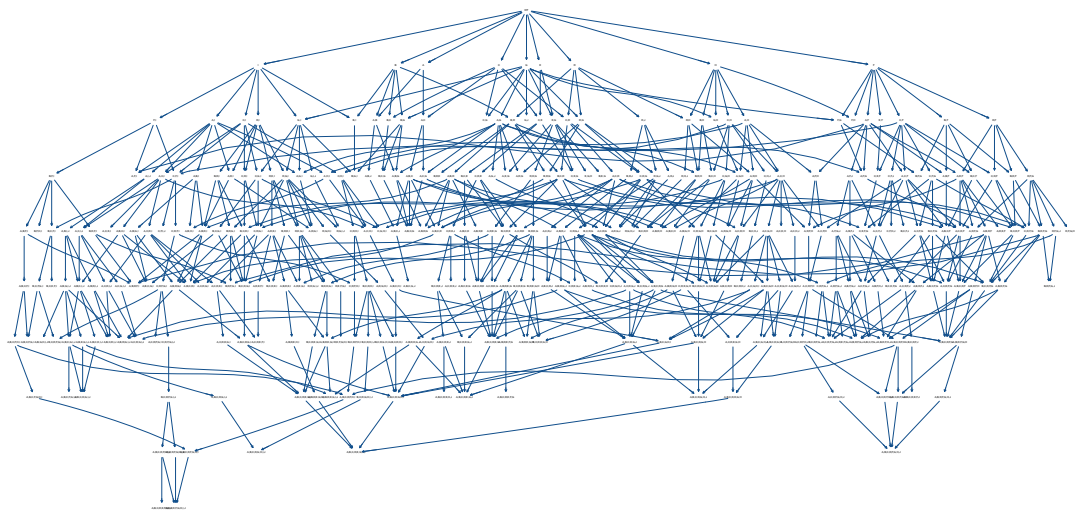

ID **qiw3nSX8uOEX3EE2**  
 acc genotypes **123**  
 peaks no back **37**  
 removed edges **NA**  
 prop rem edges **NA**

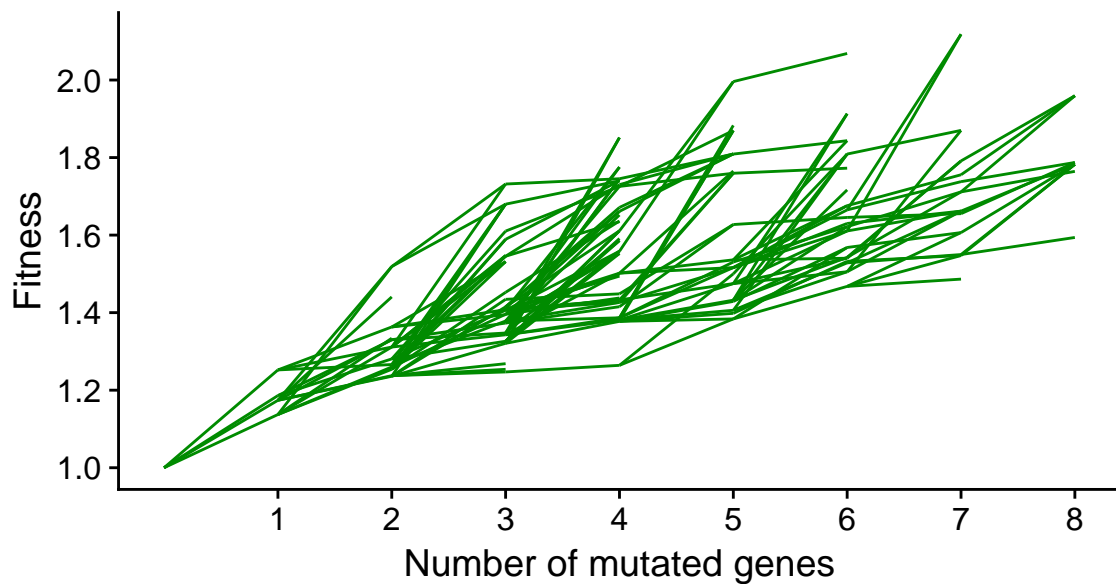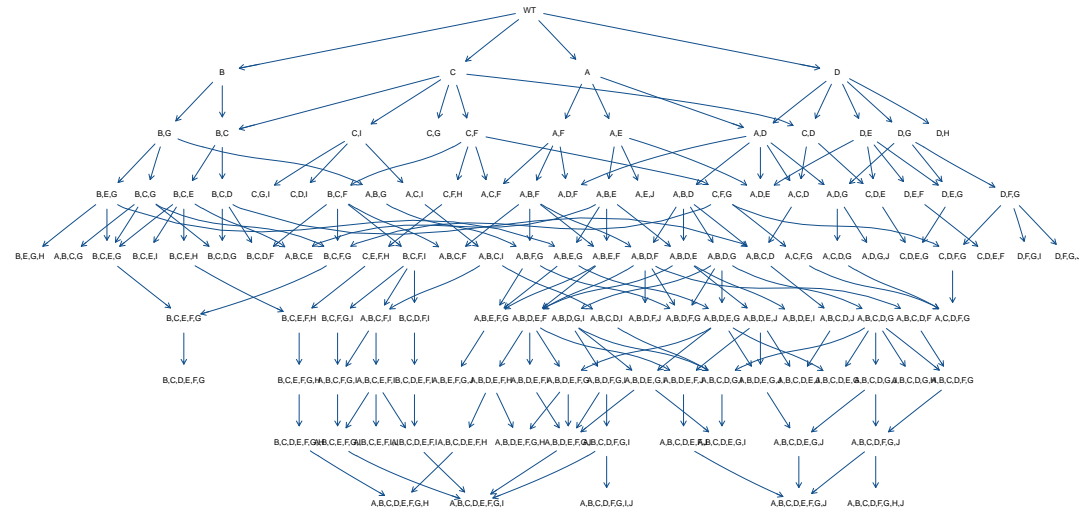

*ID* QLvp54fgddHiWuDQ  
*acc genotypes* 365  
*peaks no back* 92  
*removed edges* NA  
*prop rem edges* NA

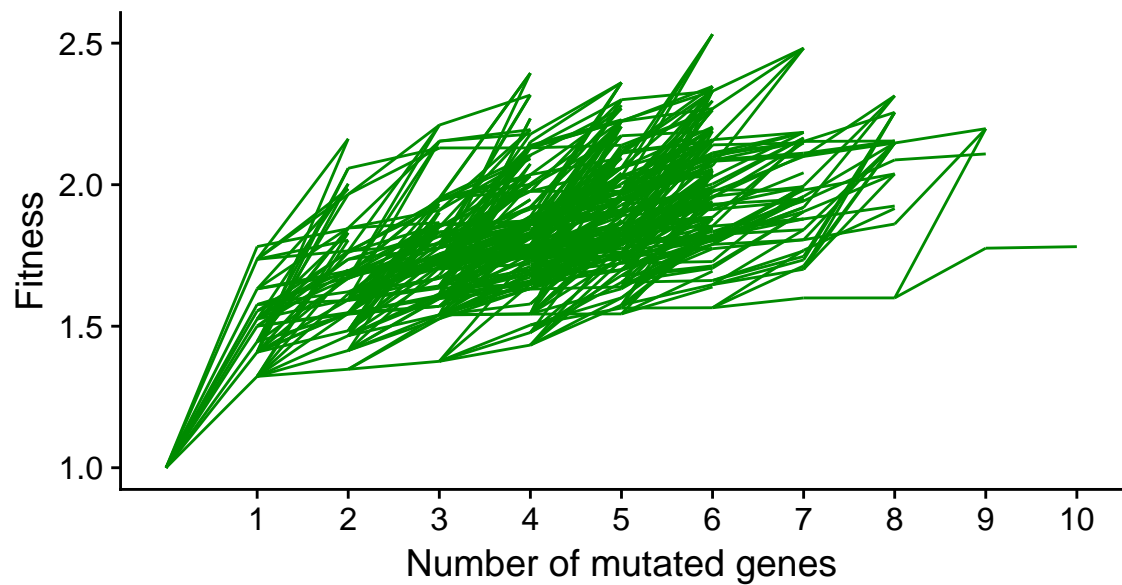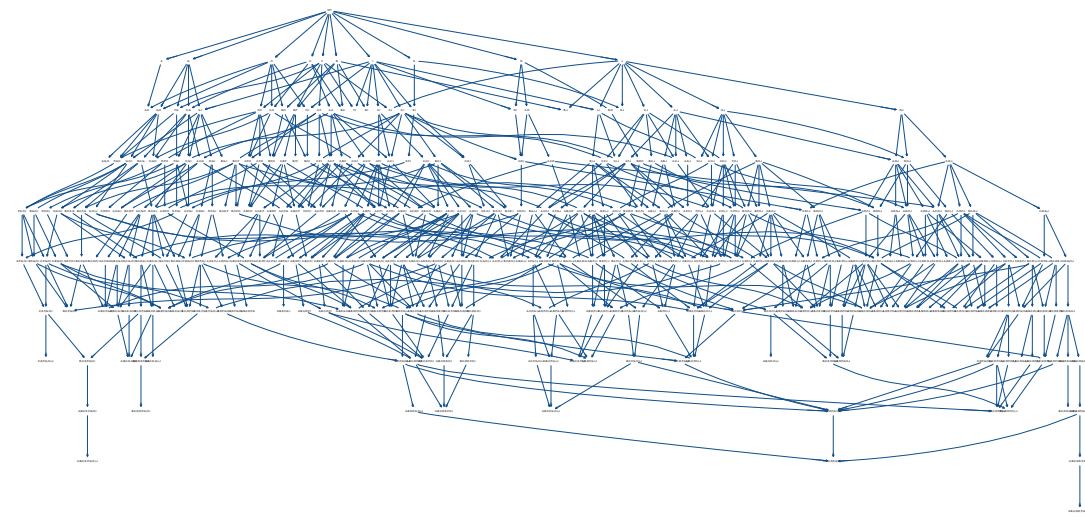

ID R1rRFK7kvGTL7JOU  
 acc genotypes 95  
 peaks no back 39  
 removed edges NA  
 prop rem edges NA

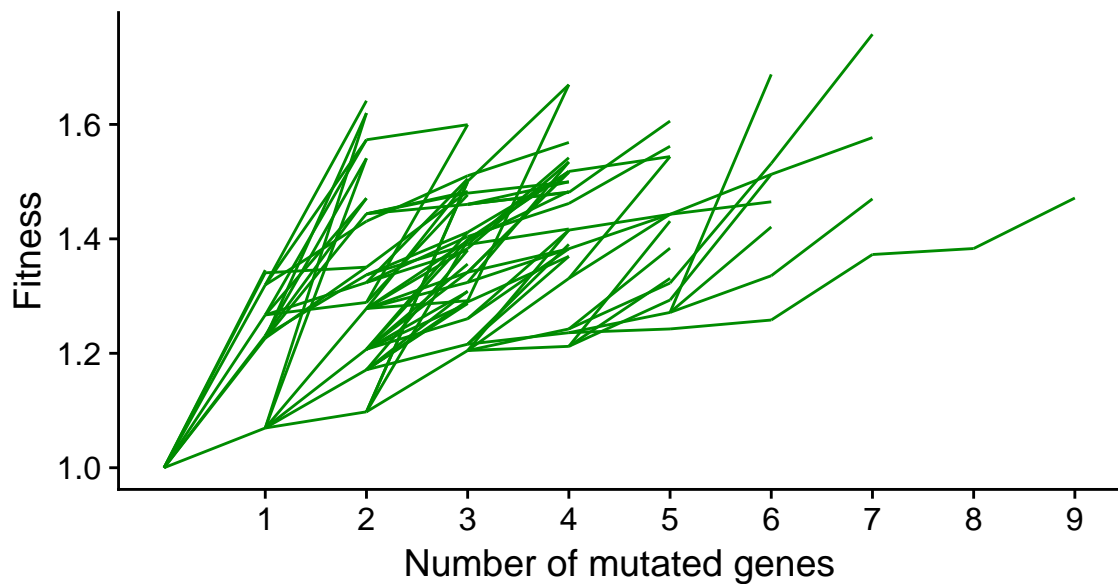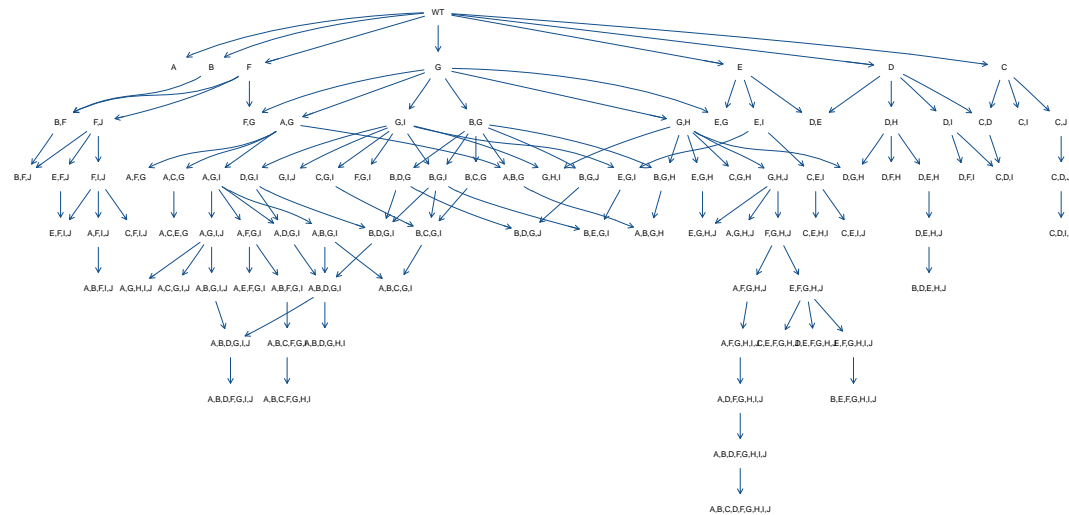

*ID* r8ycAloMMwveOtjh  
*acc genotypes* 474  
*peaks no back* 56  
*removed edges* NA  
*prop rem edges* NA

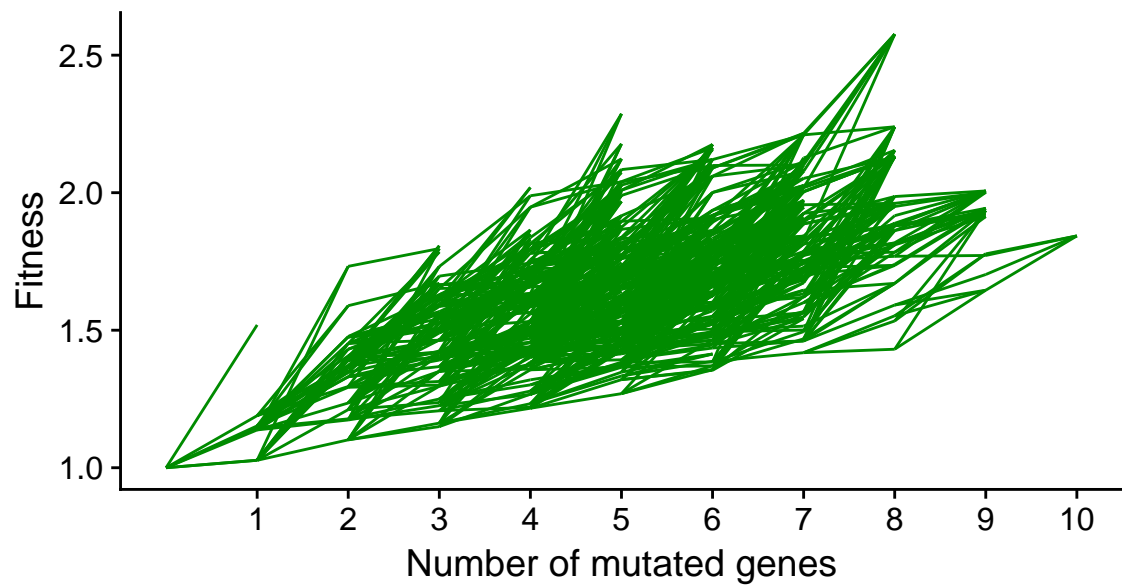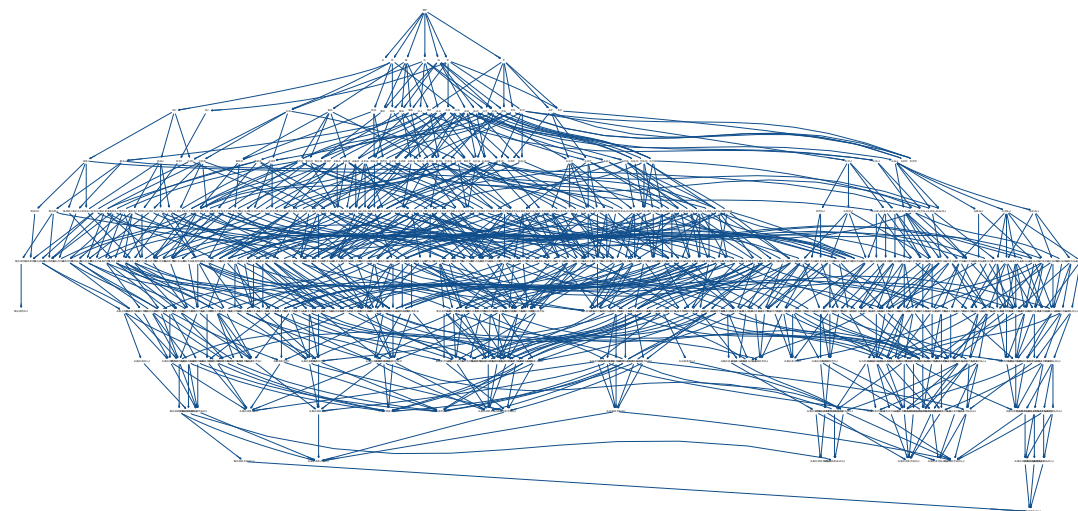

*ID* rFXDokDyxb54xE8I  
*acc genotypes* 267  
*peaks no back* 95  
*removed edges* NA  
*prop rem edges* NA

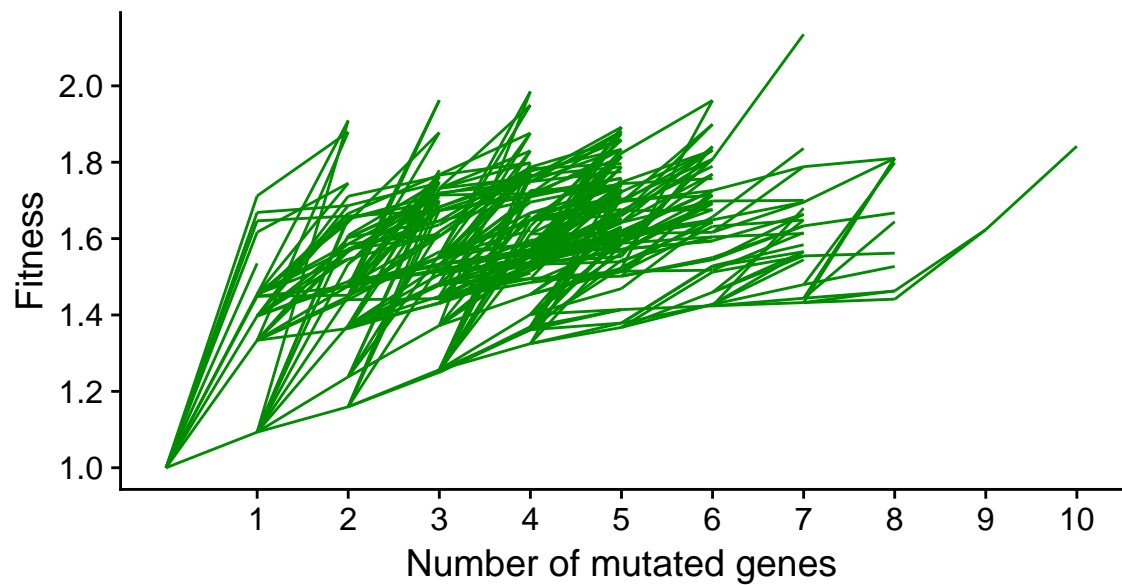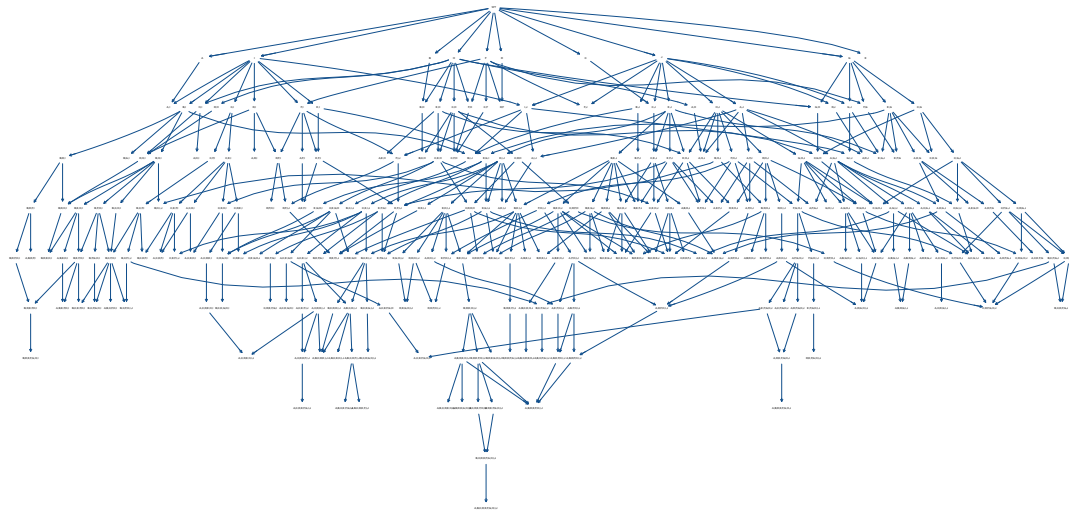

*ID* Rgbd18KzZQm310aF  
*acc genotypes* 305  
*peaks no back* 59  
*removed edges* NA  
*prop rem edges* NA

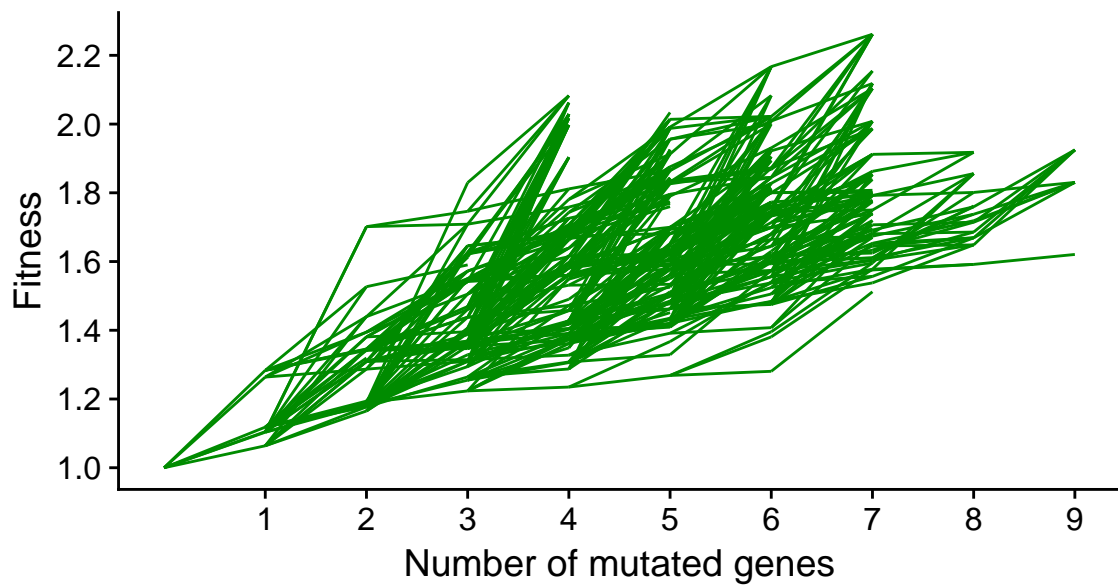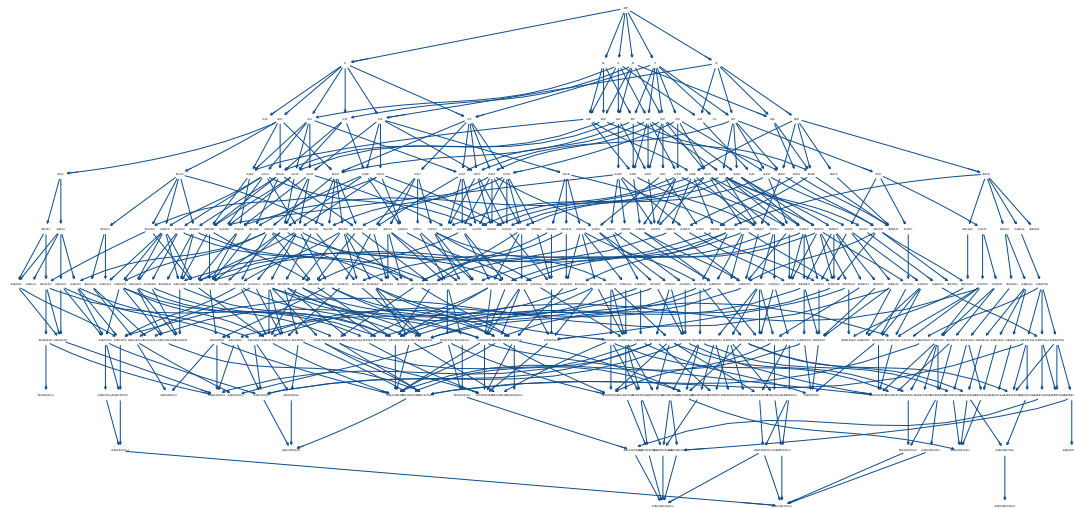



ID RgQW10wScrRmd9eE8  
 acc genotypes 65  
 peaks no back 28  
 removed edges NA  
 prop rem edges NA

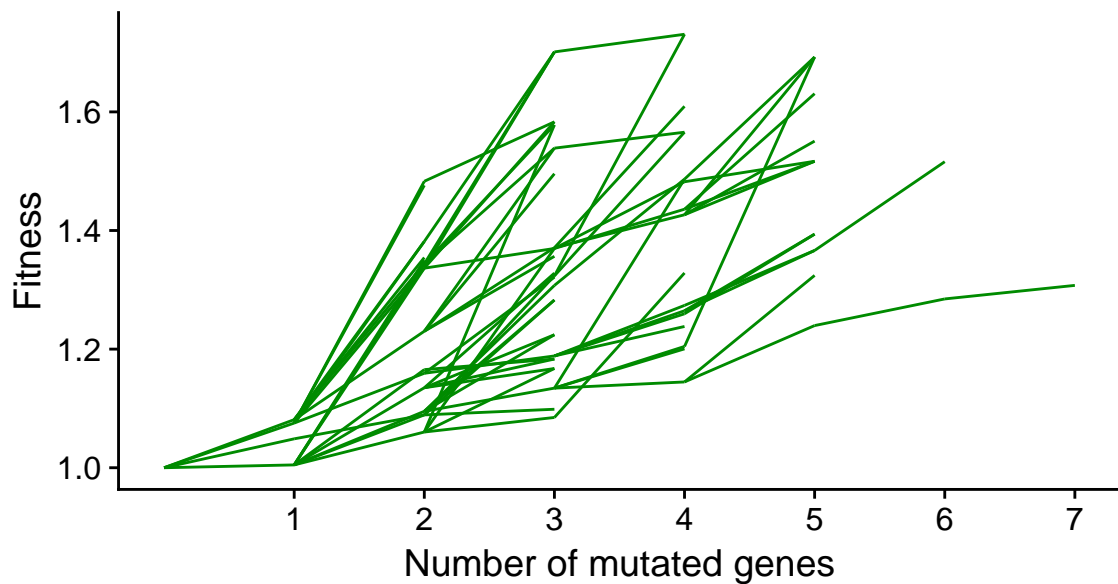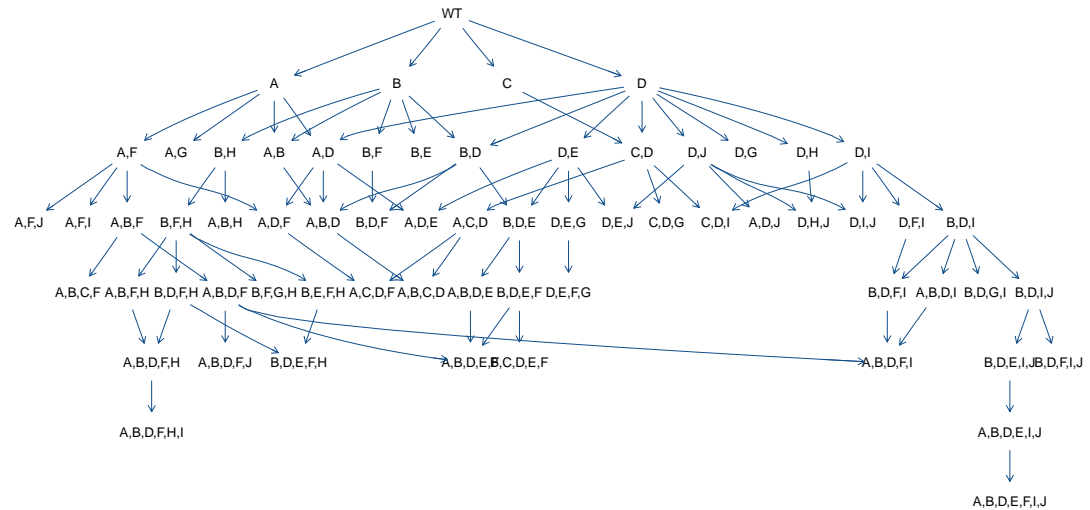

ID RM1oRnvkQ74p10MYi  
 acc genotypes 211  
 peaks no back 85  
 removed edges NA  
 prop rem edges NA

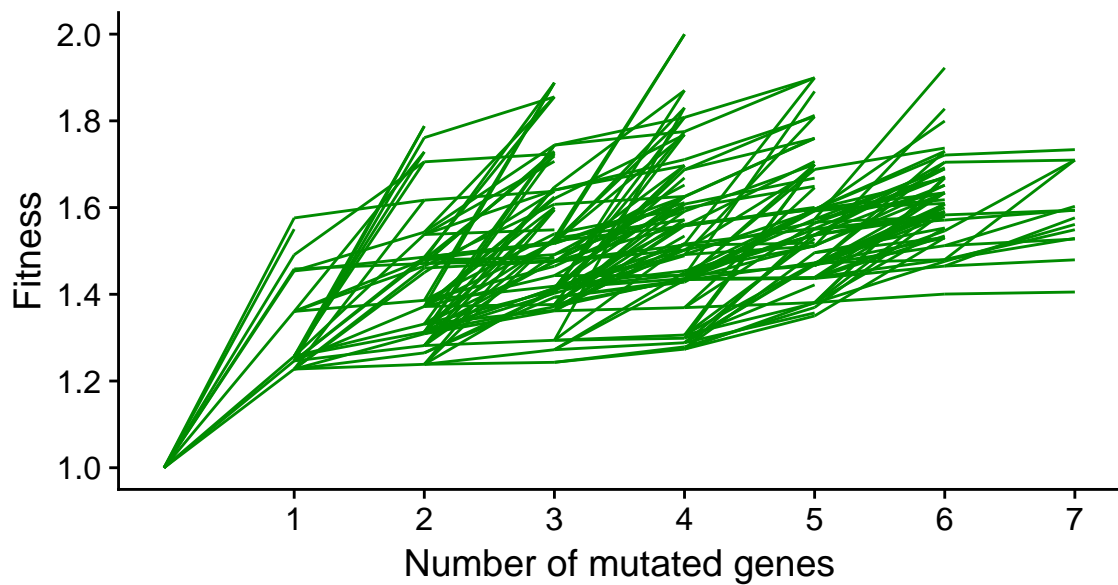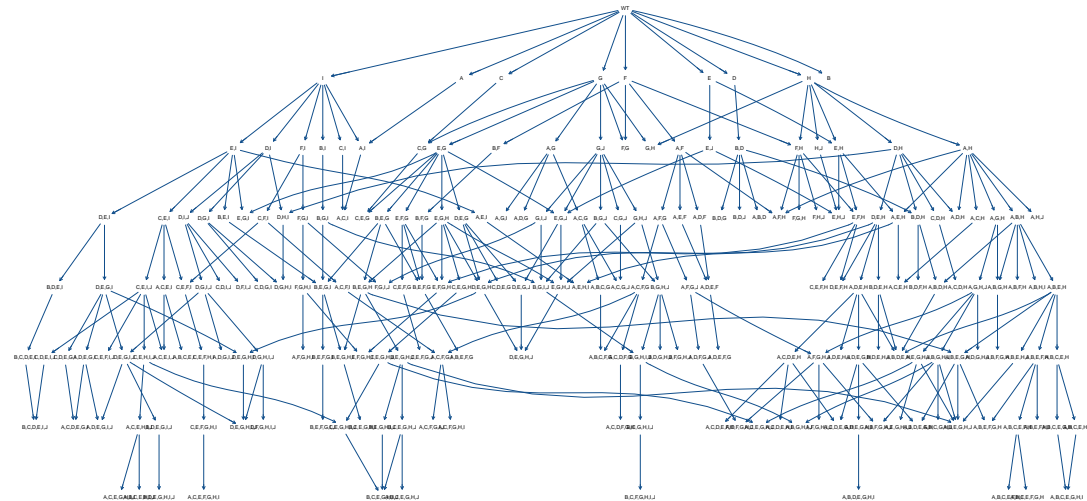

ID **rwEpMgO6p9XY5Fe3**  
 acc genotypes **59**  
 peaks no back 25  
 removed edges NA  
 prop rem edges NA

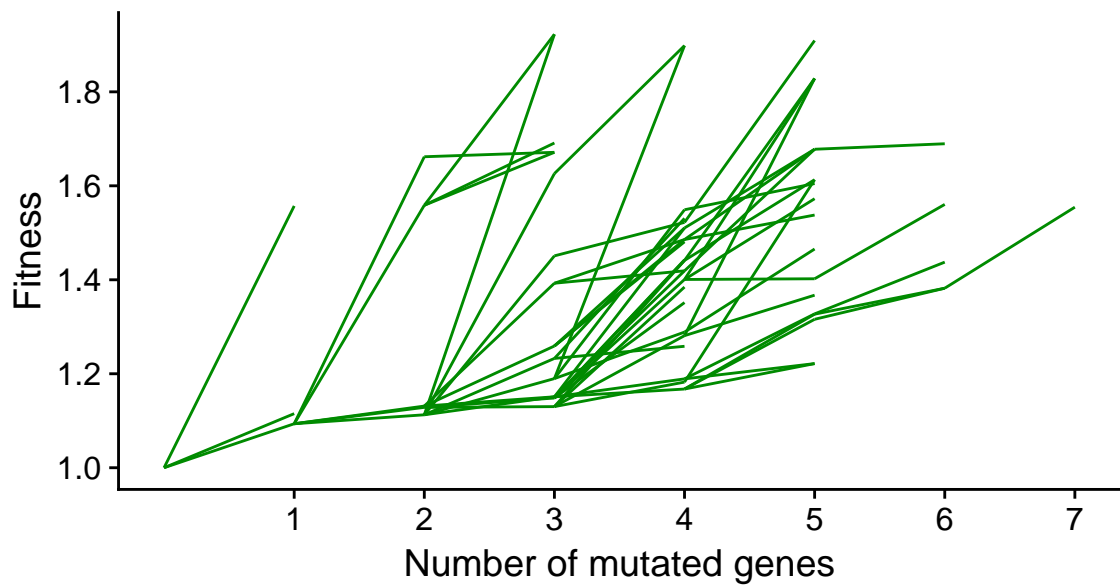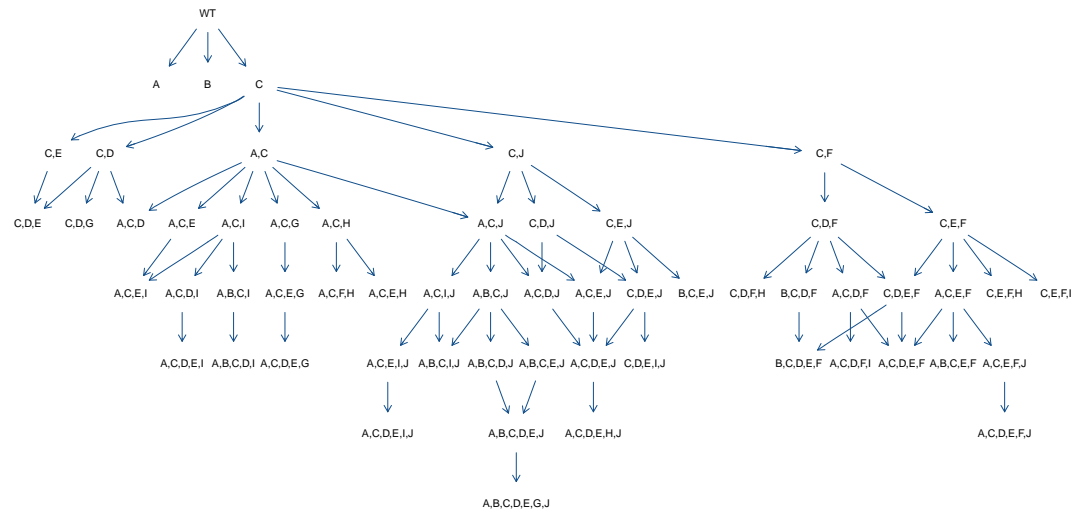

ID **siB10Dc3bBqHdWLSu**  
 acc genotypes **152**  
 peaks no back **59**  
 removed edges **NA**  
 prop rem edges **NA**

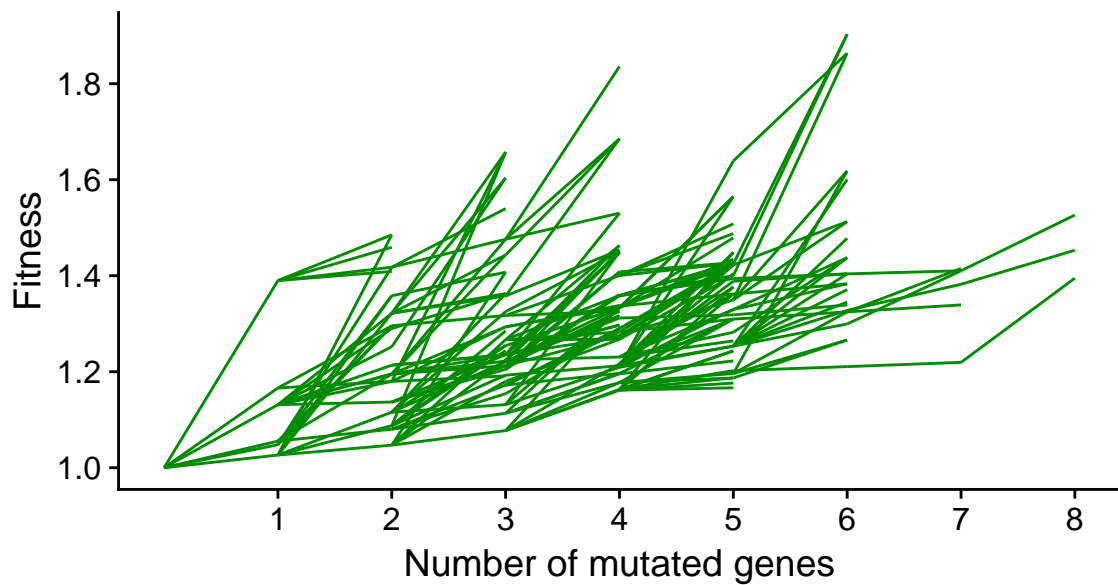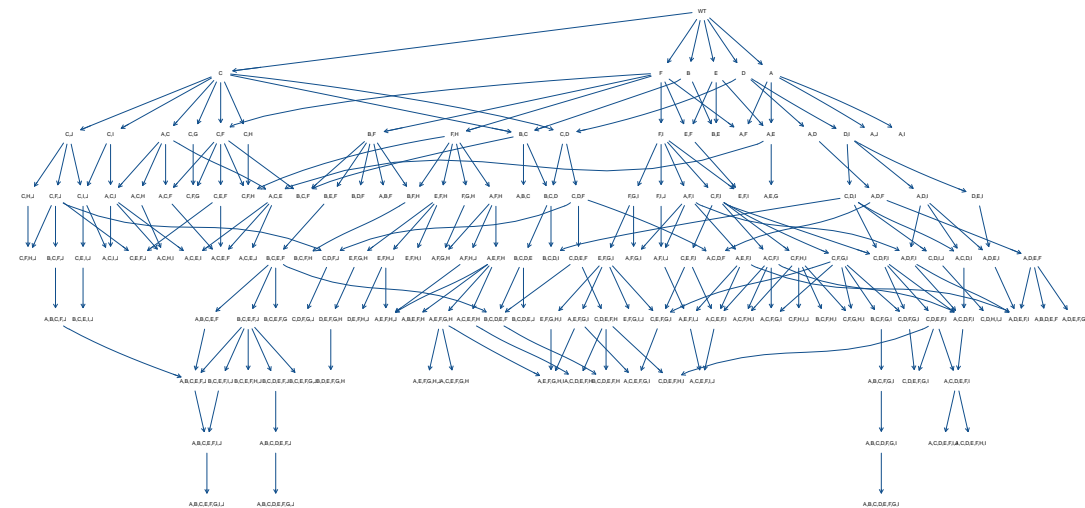

ID SkrmpMeOx2A5Xljs  
 acc genotypes 41  
 peaks no back 14  
 removed edges NA  
 prop rem edges NA

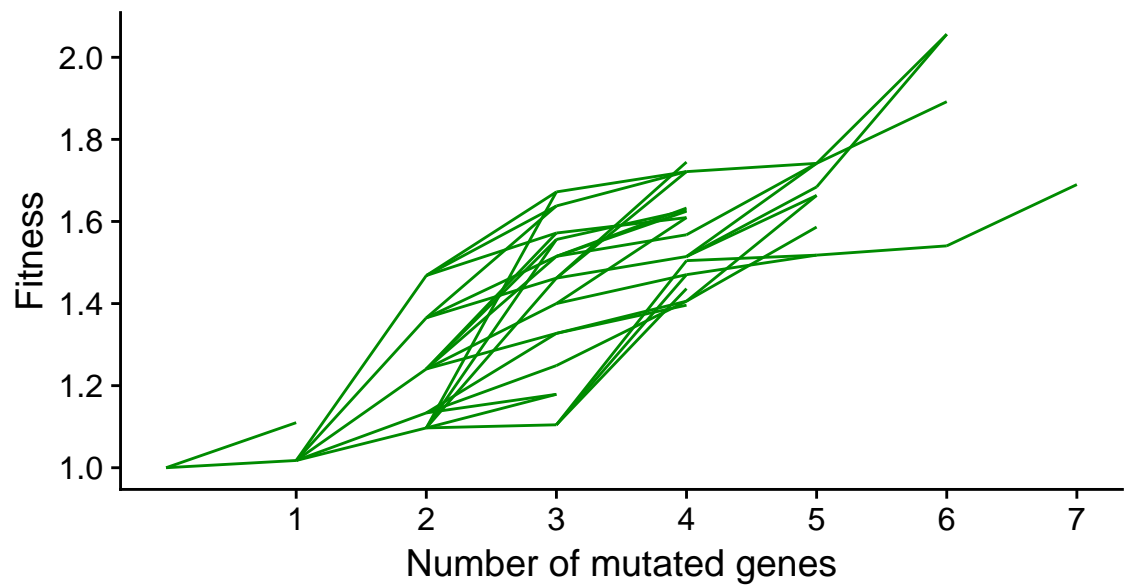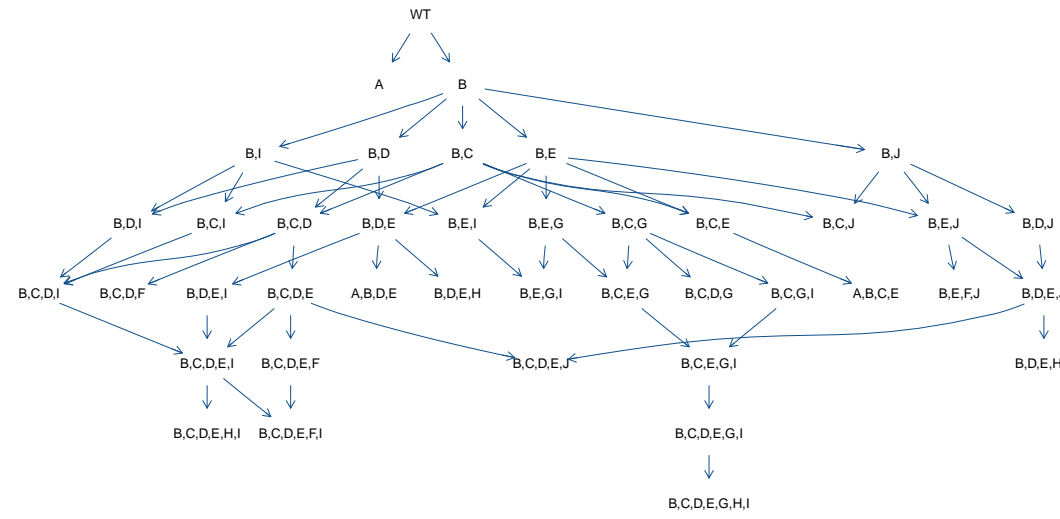

ID SKV2JZzX6hoi6ZXJ  
acc genotypes 302  
peaks no back 68  
removed edges NA  
prop rem edges NA

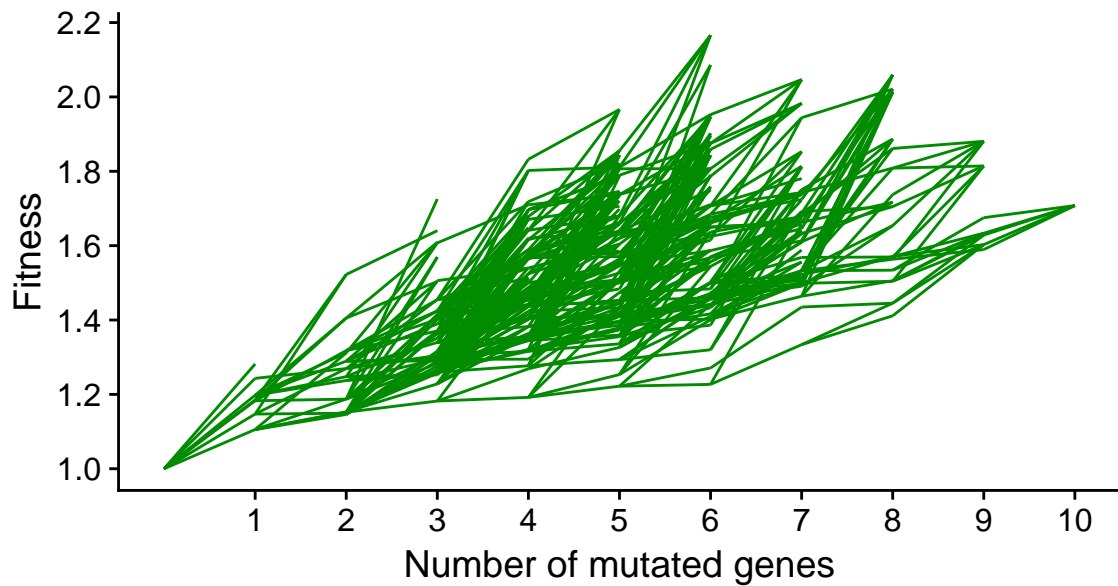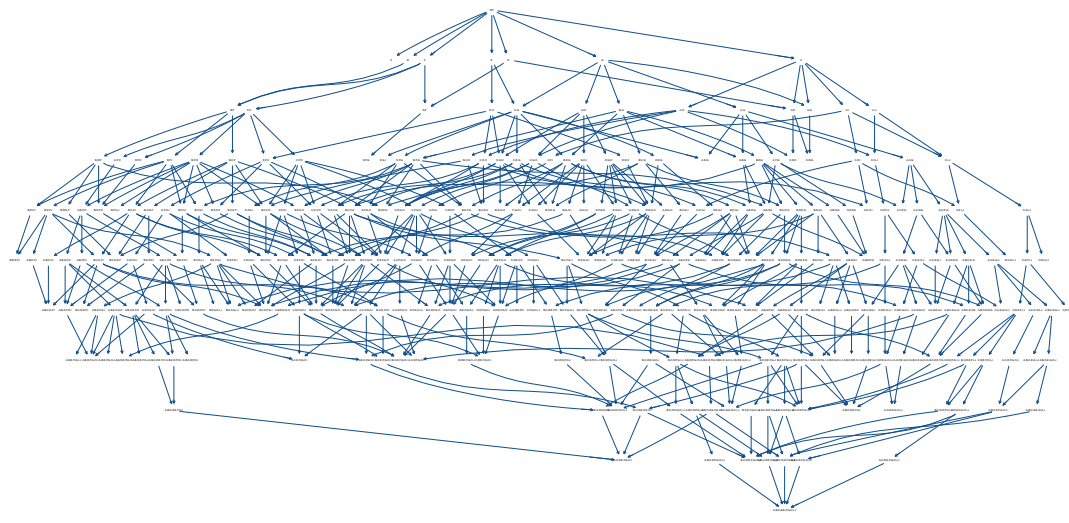

*ID* SRQPFRnma8vPJxWK  
*acc genotypes* 327  
*peaks no back* 103  
*removed edges* NA  
*prop rem edges* NA

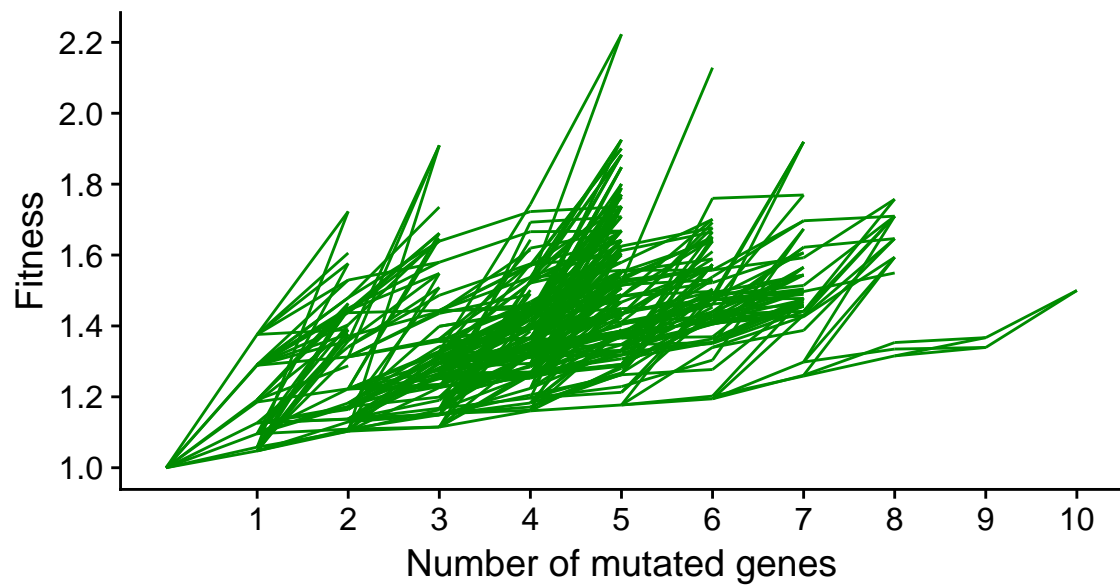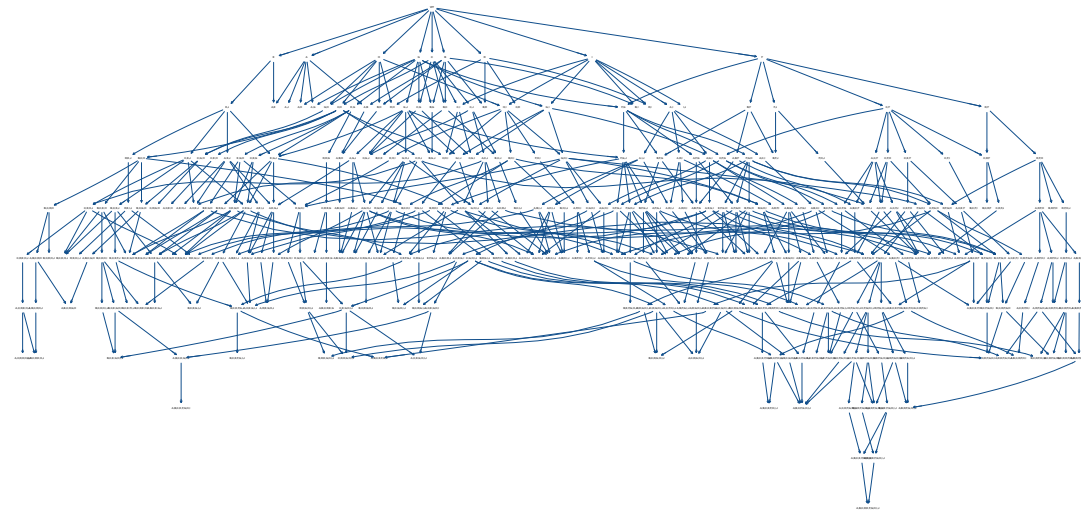

*ID* suRv8SDkQ3Fspdke  
*acc genotypes* 330  
*peaks no back* 113  
*removed edges* NA  
*prop rem edges* NA

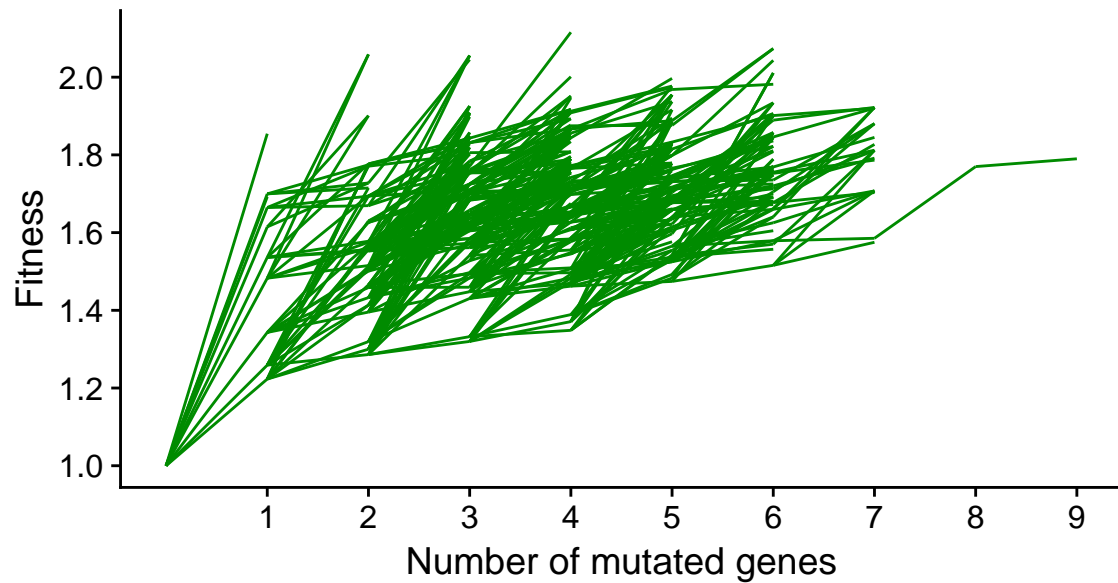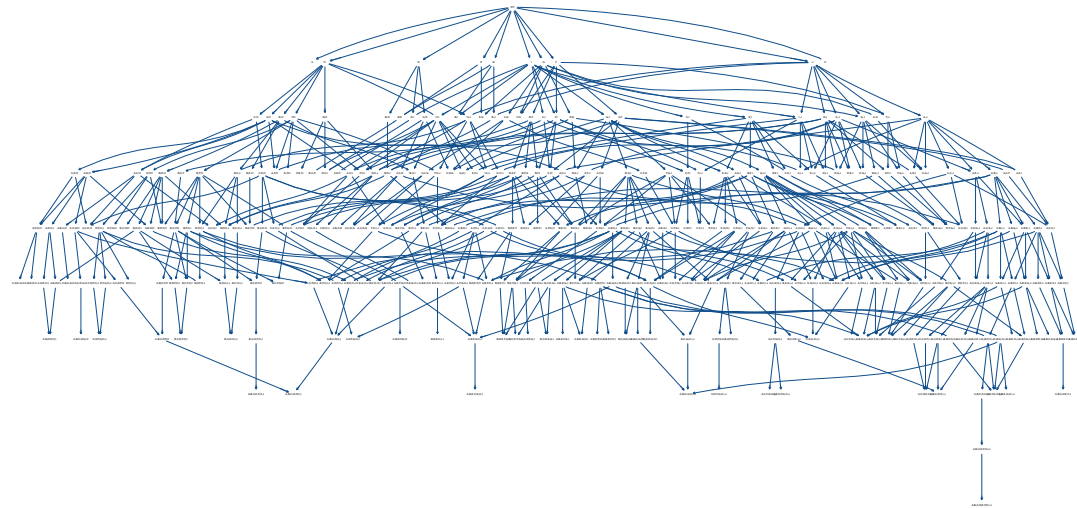



ID **SUX11JboEBbU7Sly**  
acc genotypes **159**  
peaks no back 49  
removed edges NA  
prop rem edges NA

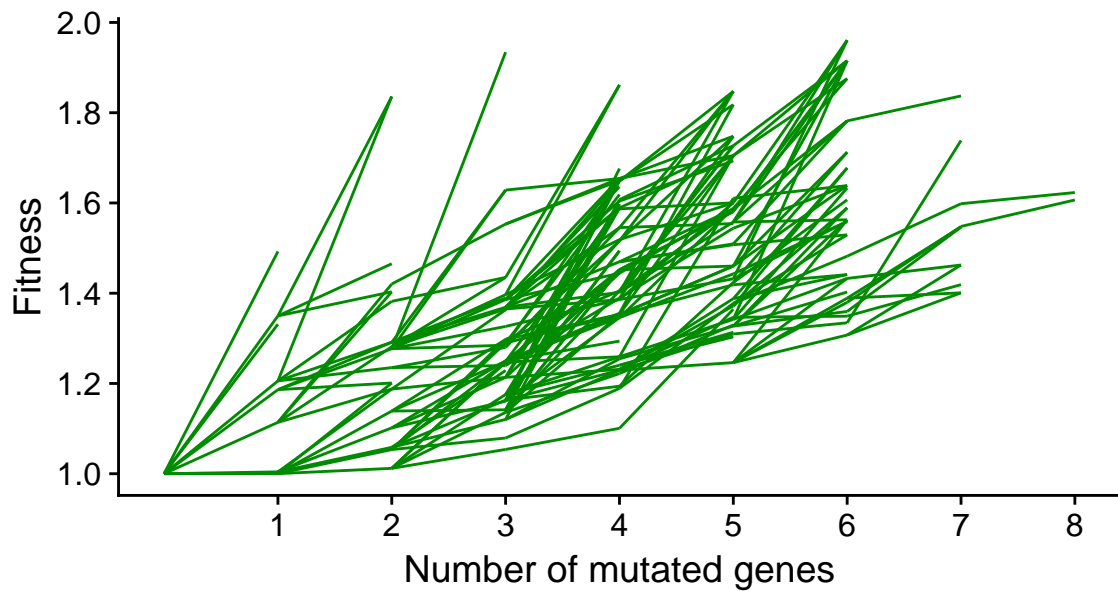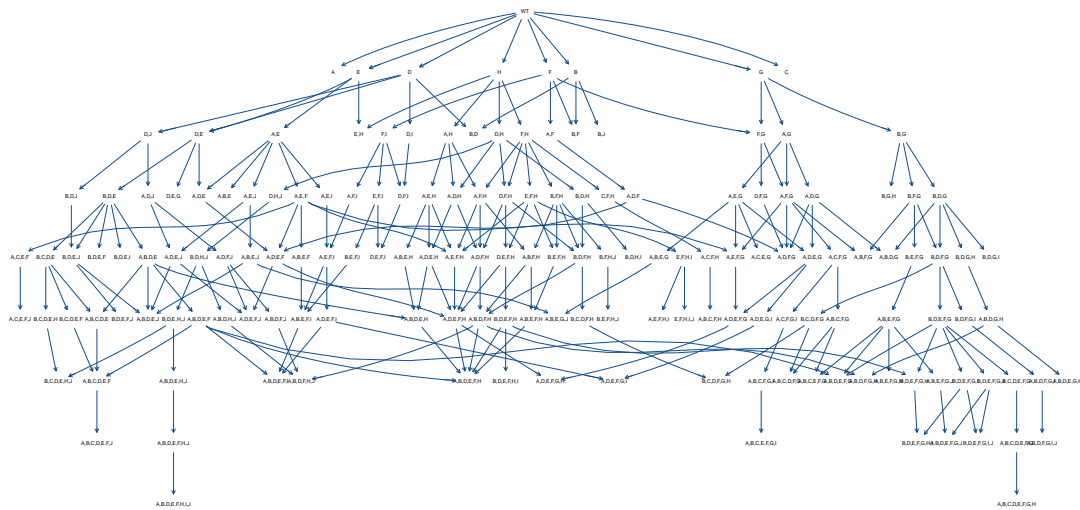

ID T1lg10UC4ysvdG1vj  
 acc genotypes 75  
 peaks no back 31  
 removed edges NA  
 prop rem edges NA

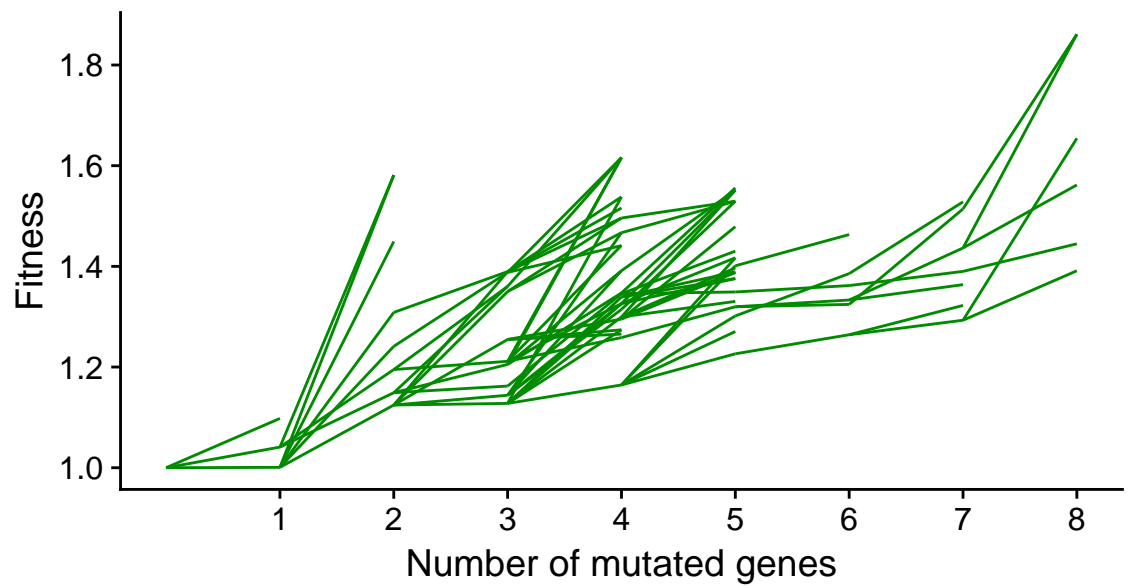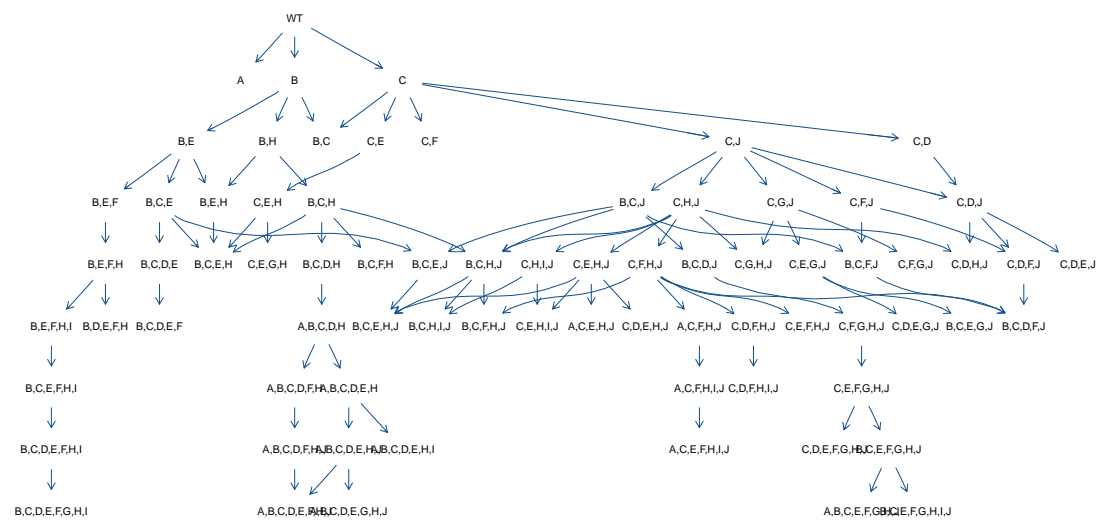

ID T5oZEwzVo6JyuGLW  
 acc genotypes 125  
 peaks no back 52  
 removed edges NA  
 prop rem edges NA

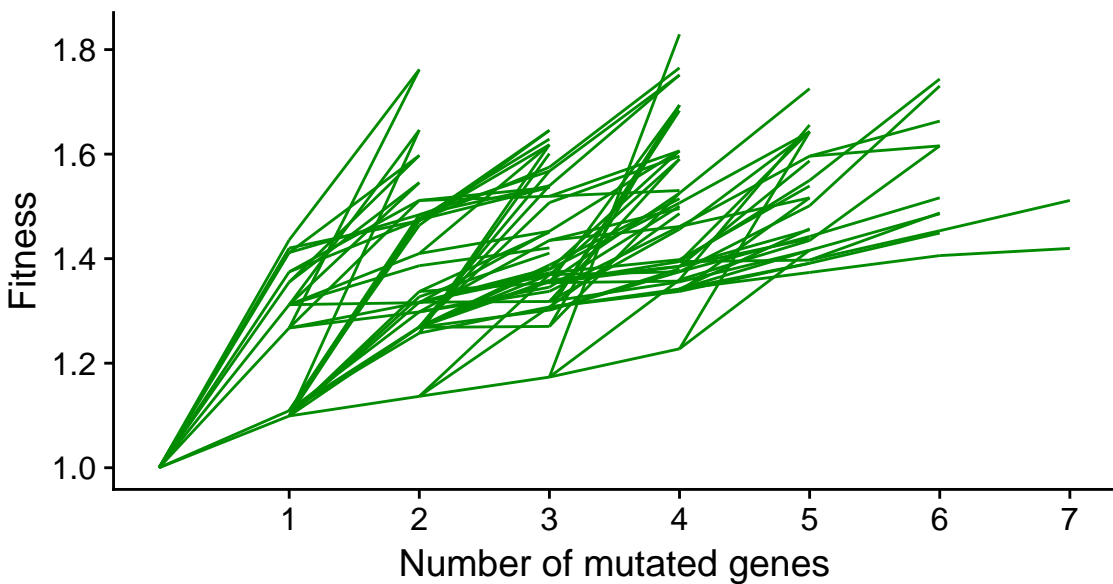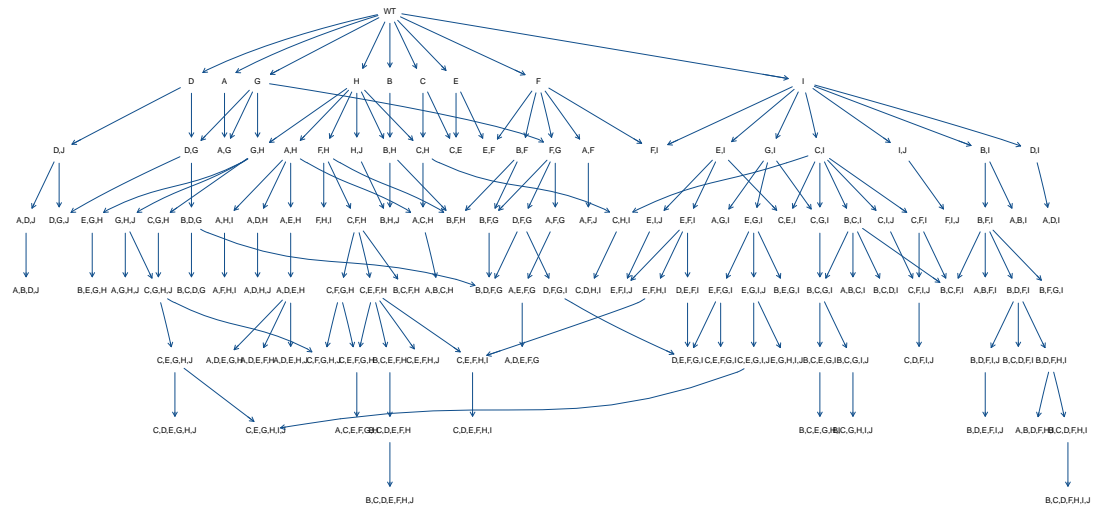

ID Tklr7flyal9UtU86  
 acc genotypes 142  
 peaks no back 60  
 removed edges NA  
 prop rem edges NA

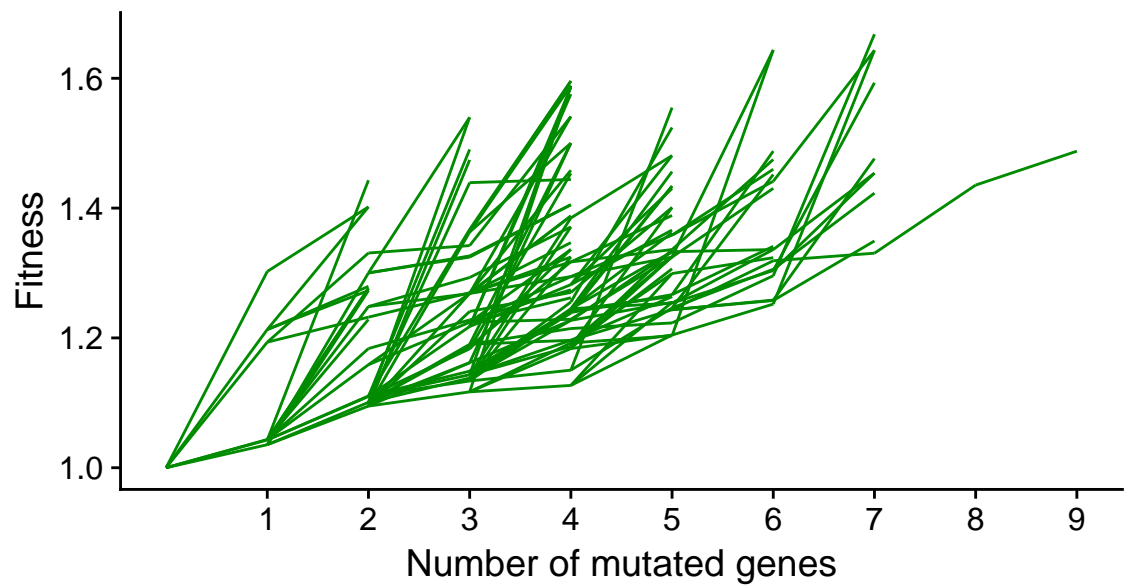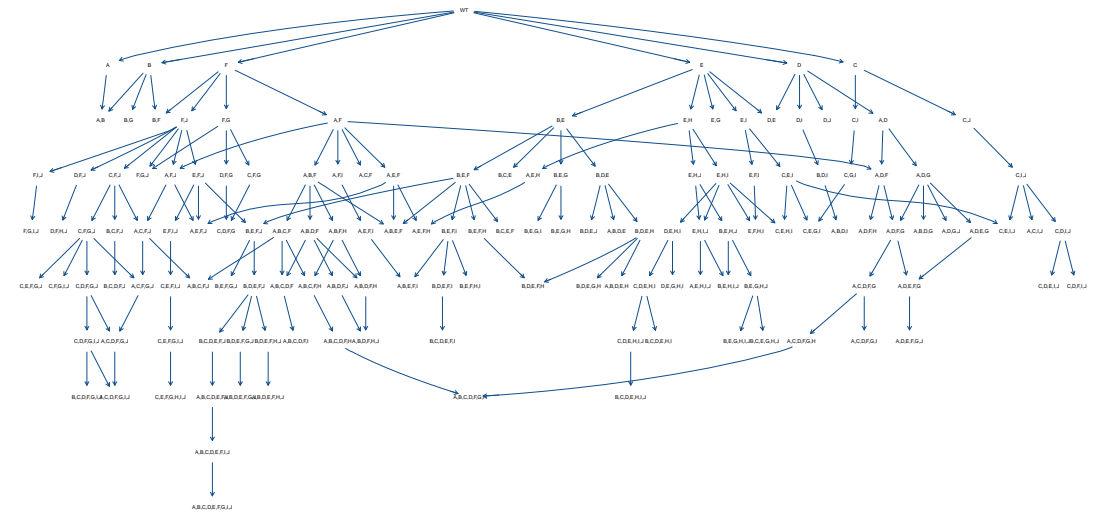

ID tKkGKUAR1sBTETkR  
 acc genotypes 209  
 peaks no back 70  
 removed edges NA  
 prop rem edges NA

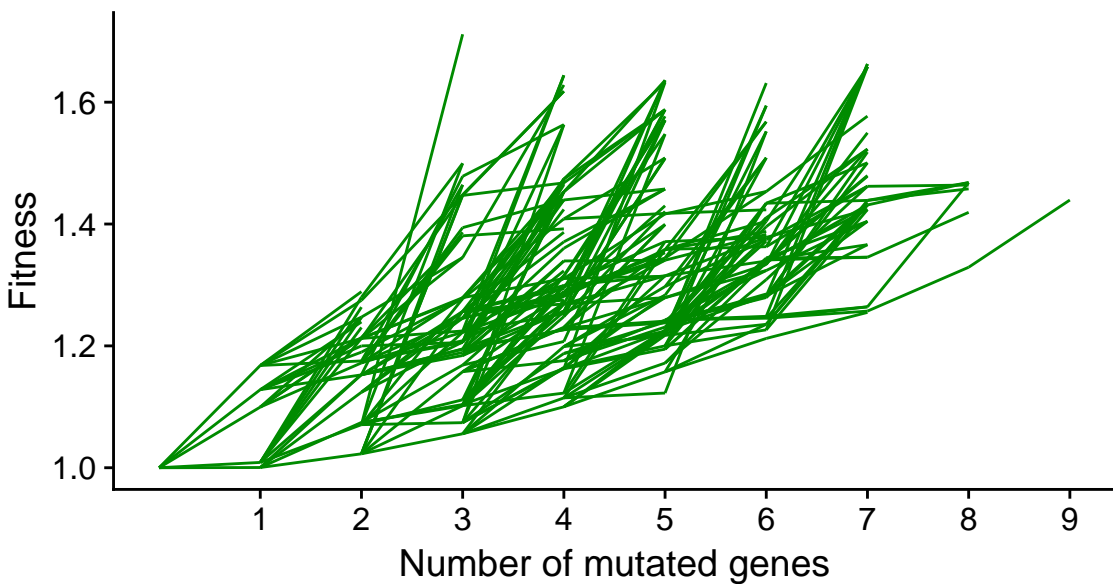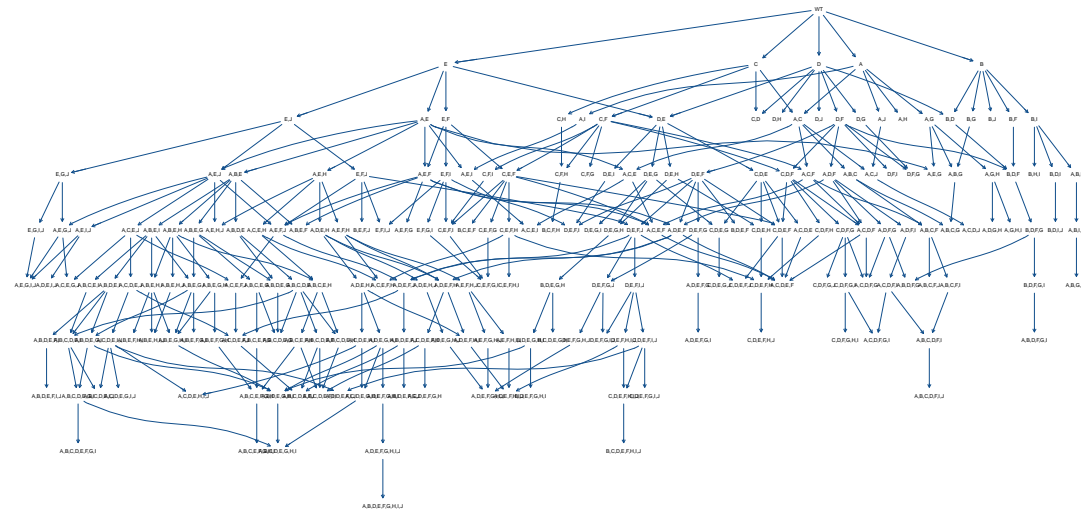

ID tyHTZO351lxuXhpp  
acc genotypes 173  
peaks no back 40  
removed edges NA  
prop rem edges NA

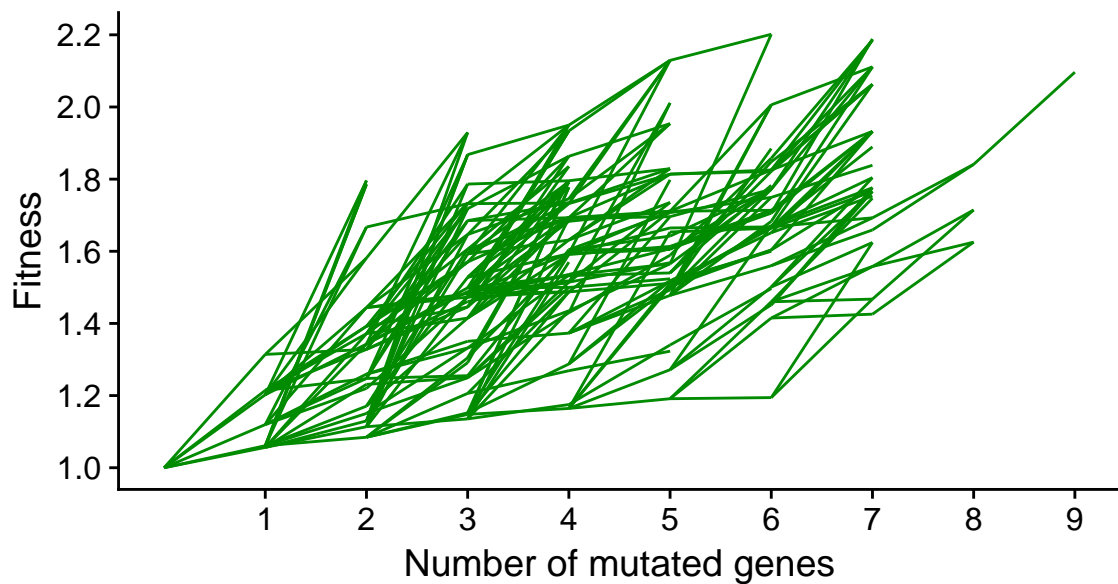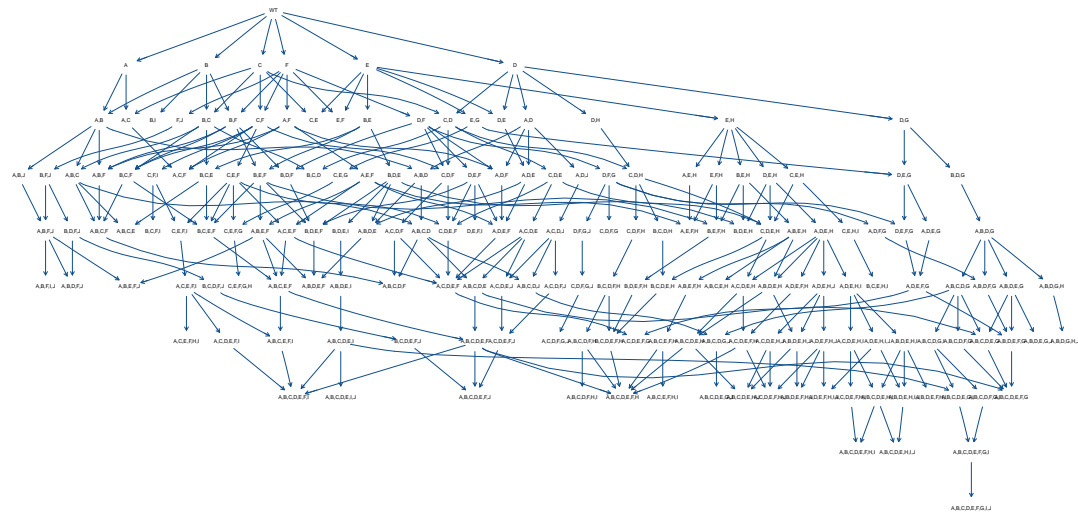

ID u4QnEyMMh8u2Dmoq  
acc genotypes 302  
peaks no back 82  
removed edges NA  
prop rem edges NA

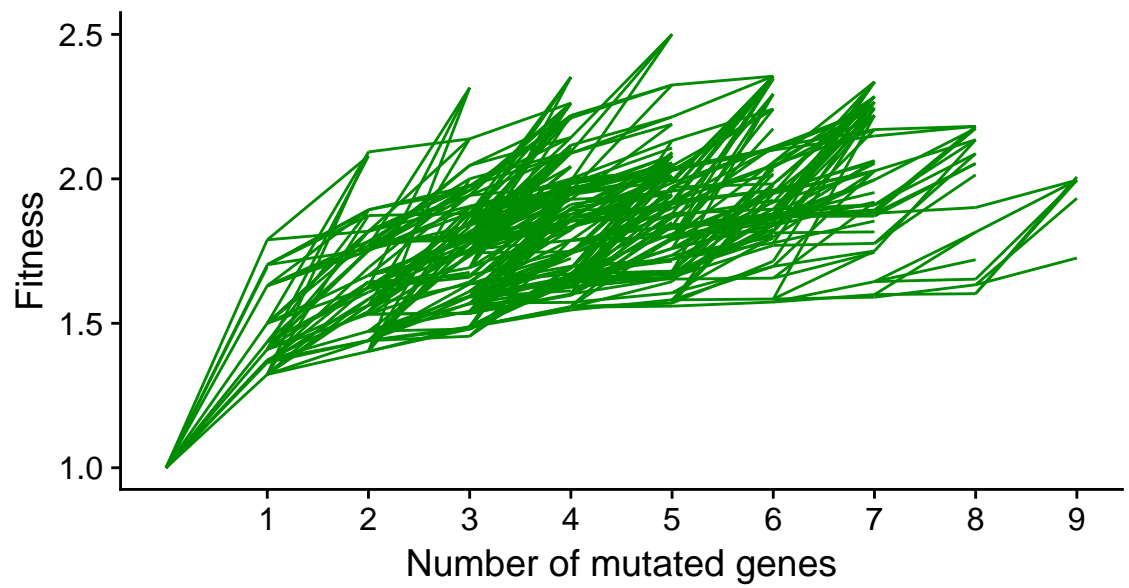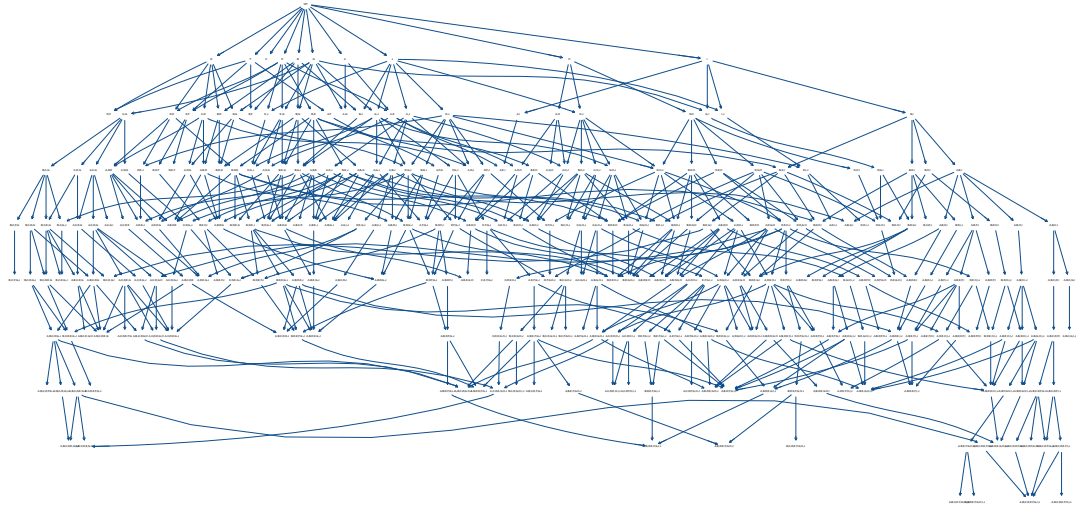

*ID* u6D56PFLKLEytrF  
*acc genotypes* 243  
*peaks no back* 53  
*removed edges* NA  
*prop rem edges* NA

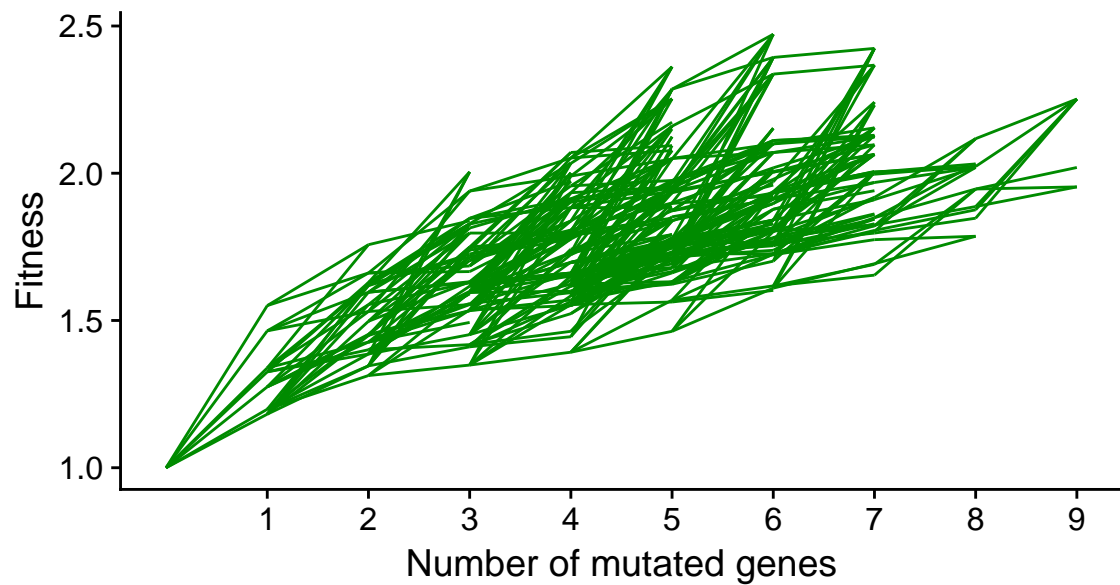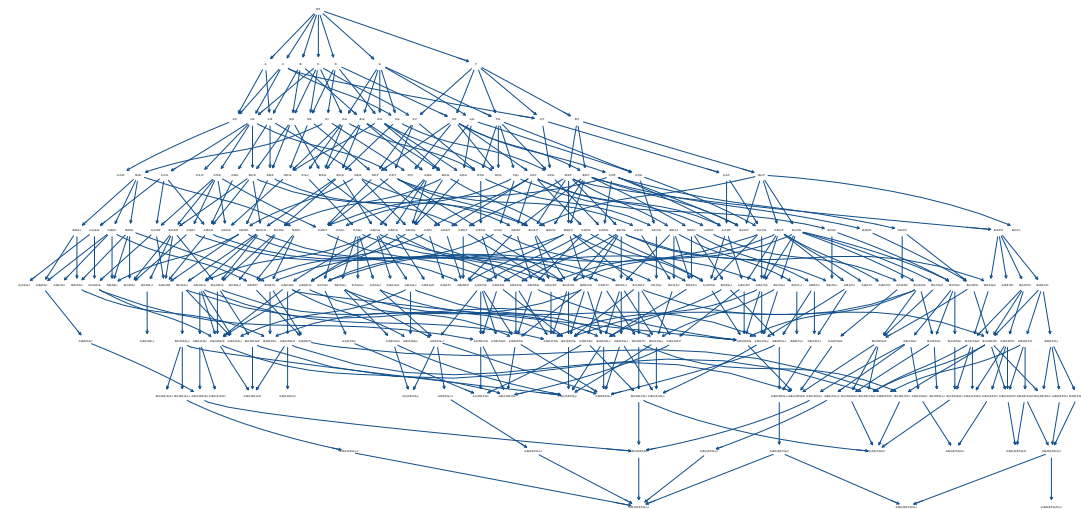



ID u8aziQ10mxkwi2VPc  
acc genotypes 57  
peaks no back 19  
removed edges NA  
prop rem edges NA

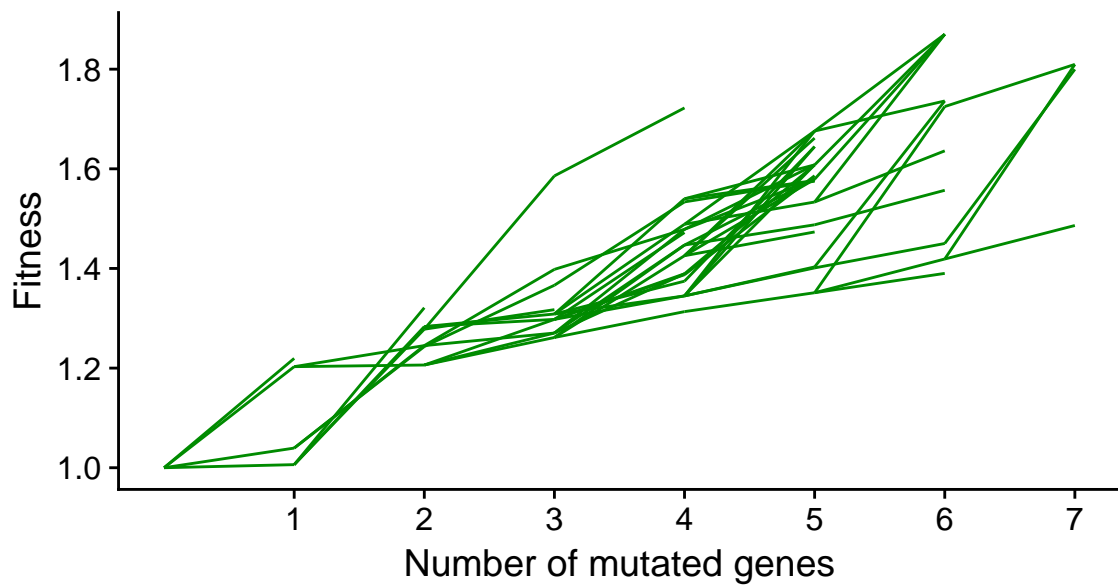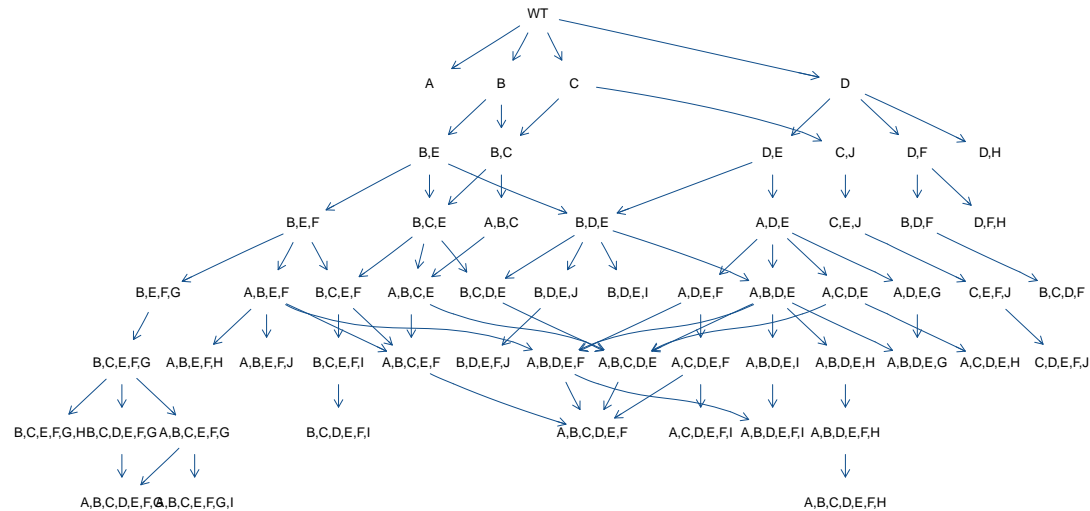

ID U9tKbeEaFO915pcB  
 acc genotypes 151  
 peaks no back 66  
 removed edges NA  
 prop rem edges NA

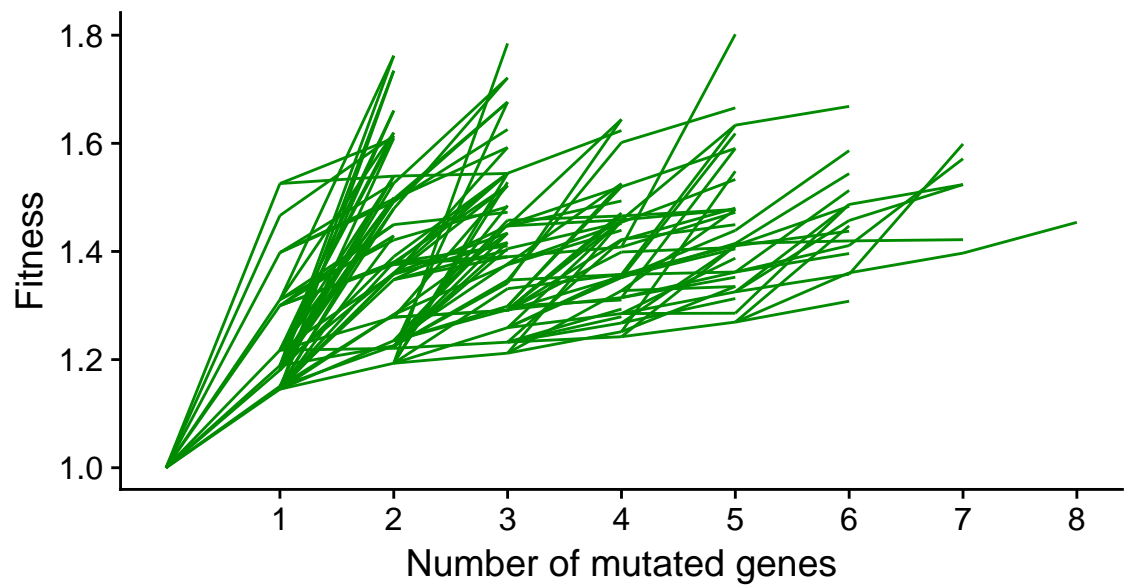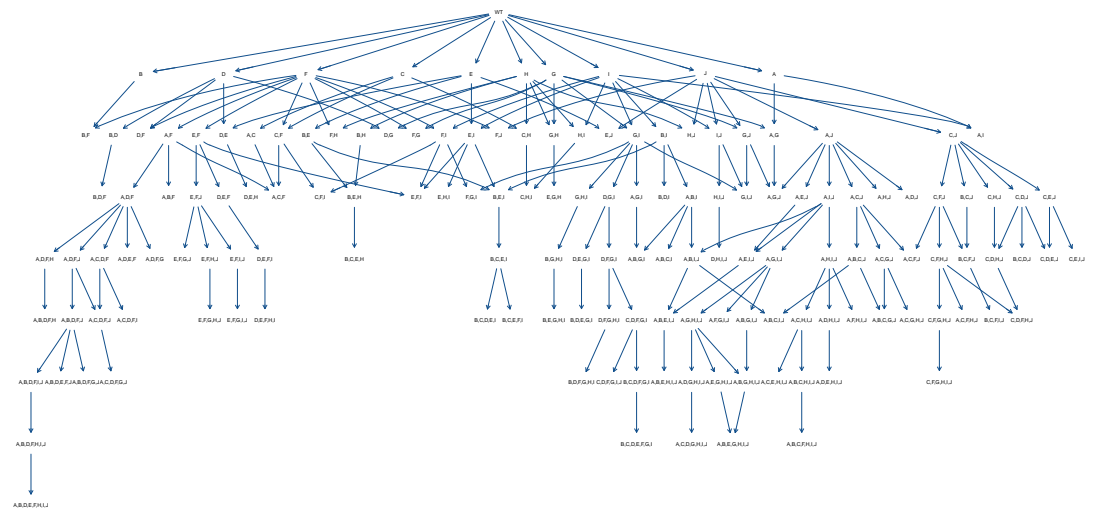

*ID* uaHRvH1XC9BSLS5  
*acc genotypes* 333  
*peaks no back* 60  
*removed edges* NA  
*prop rem edges* NA

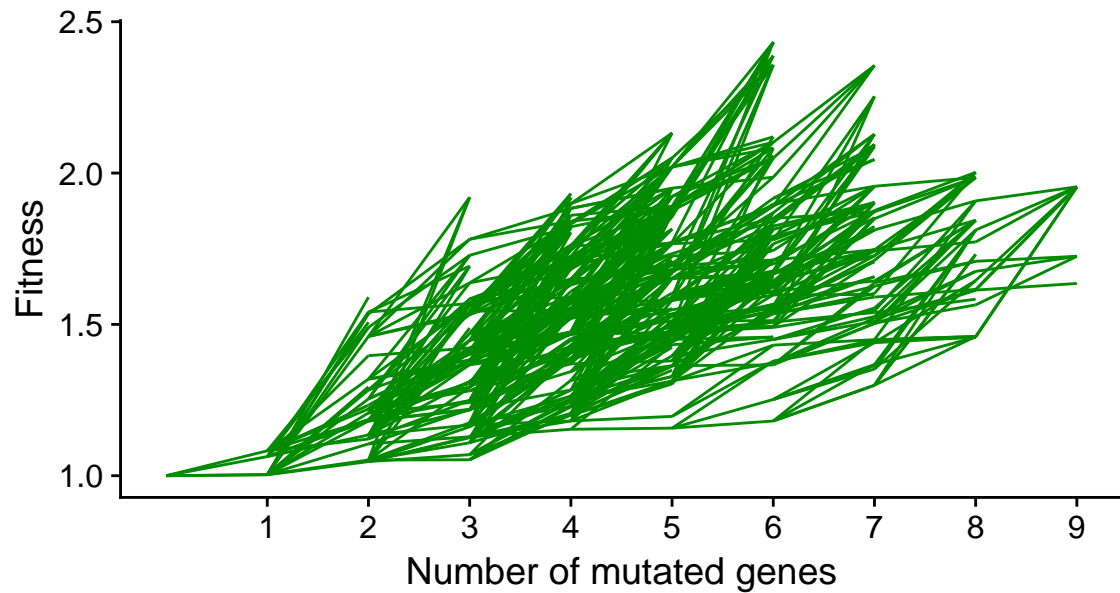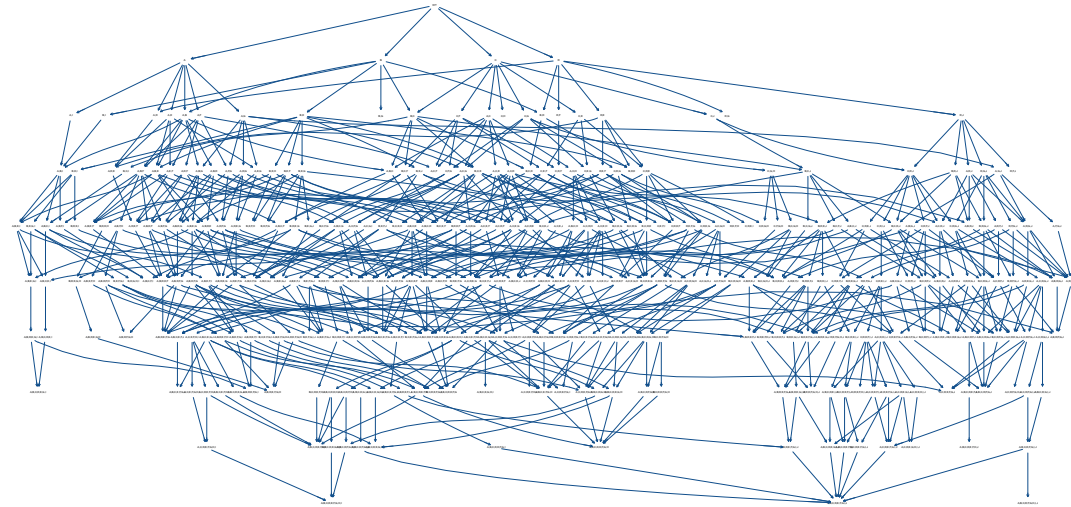

ID UdlzVbWbljfForTa  
 acc genotypes 206  
 peaks no back 78  
 removed edges NA  
 prop rem edges NA

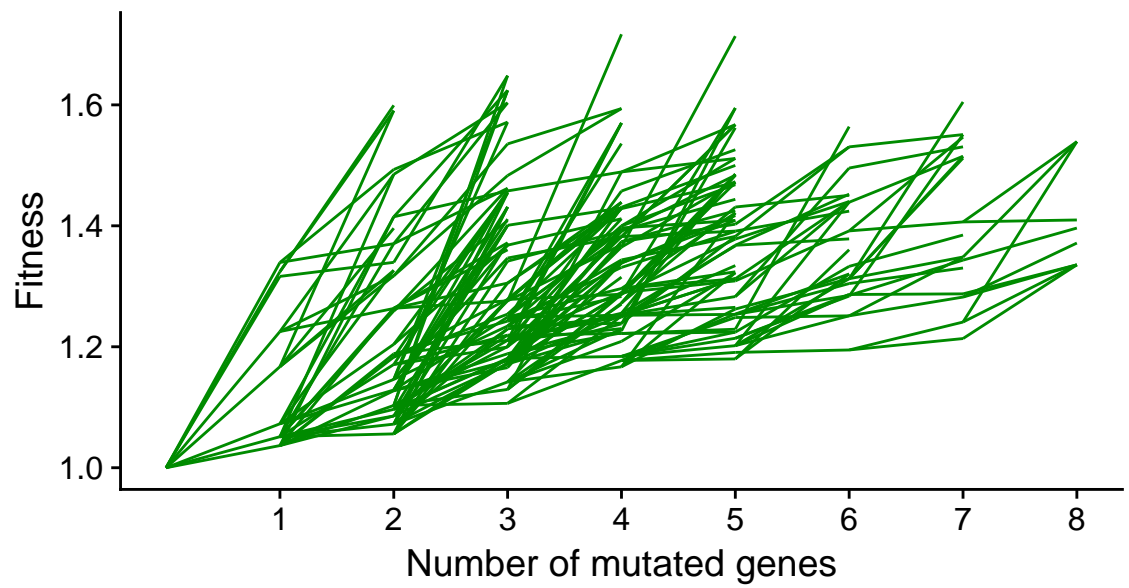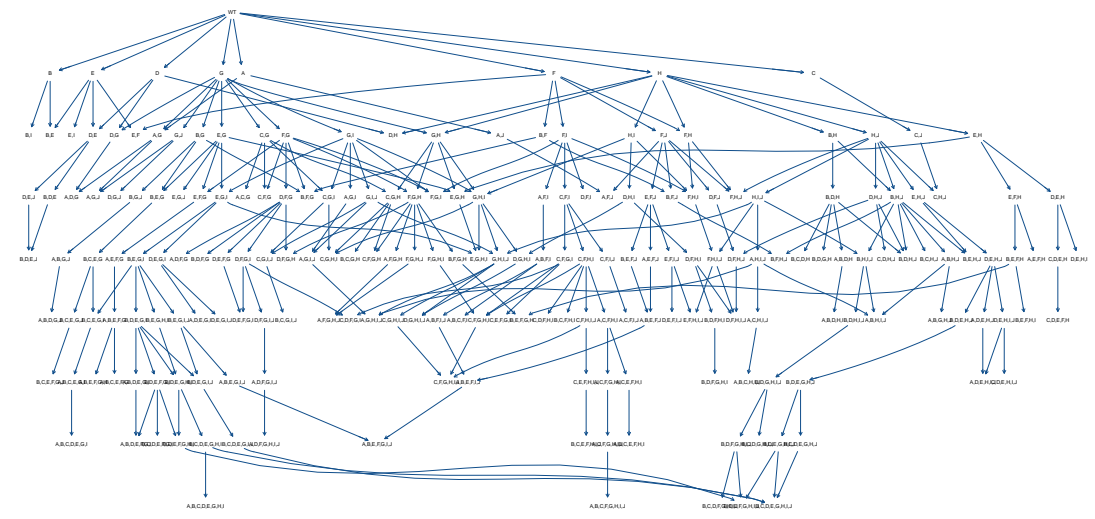

ID Ug5fs10lfz6uMbgO  
acc genotypes 225  
peaks no back 65  
removed edges NA  
prop rem edges NA

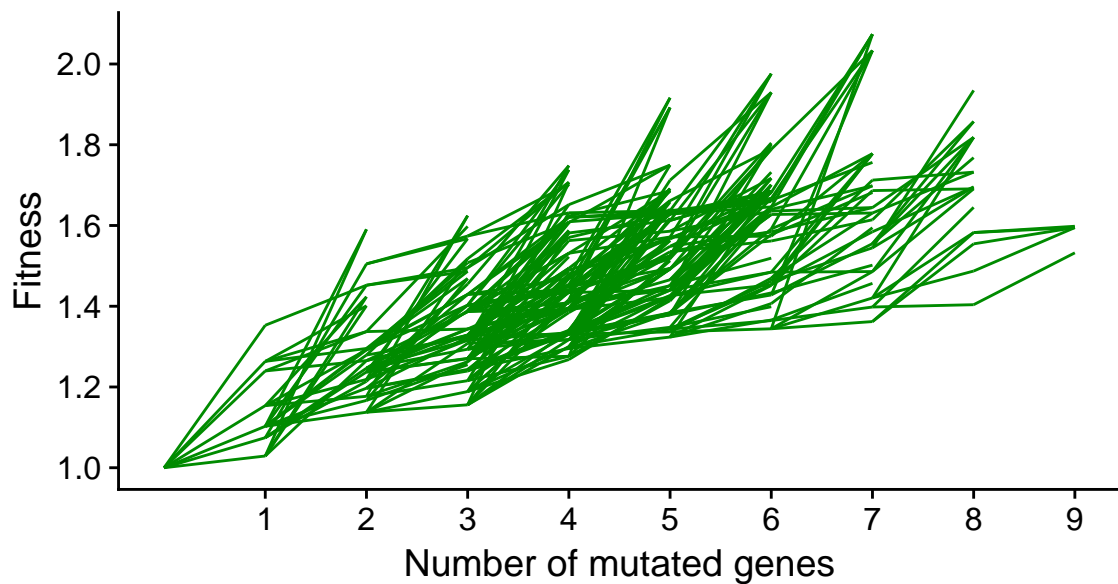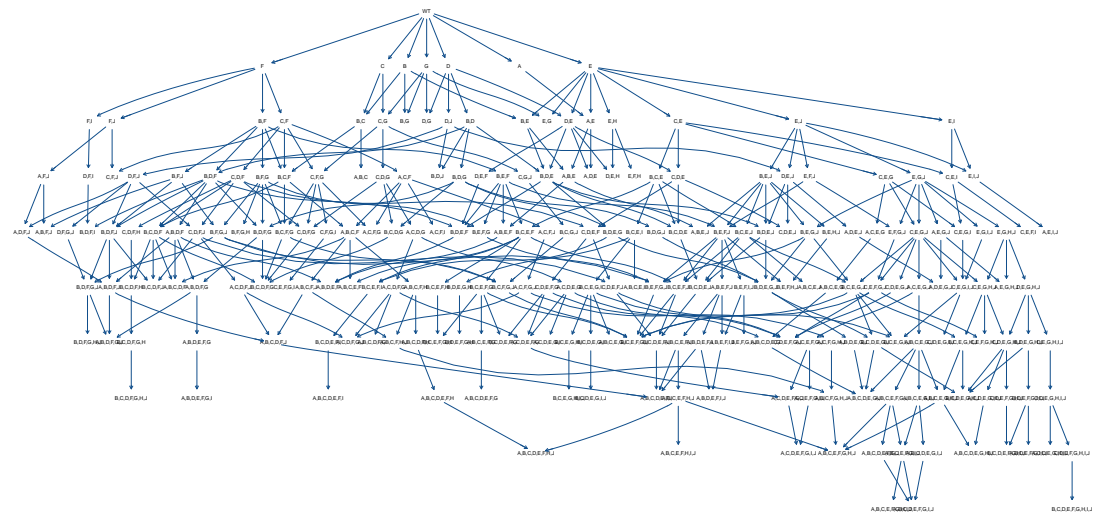

ID UmunqSzUuUKy8o5l  
 acc genotypes 172  
 peaks no back 56  
 removed edges NA  
 prop rem edges NA

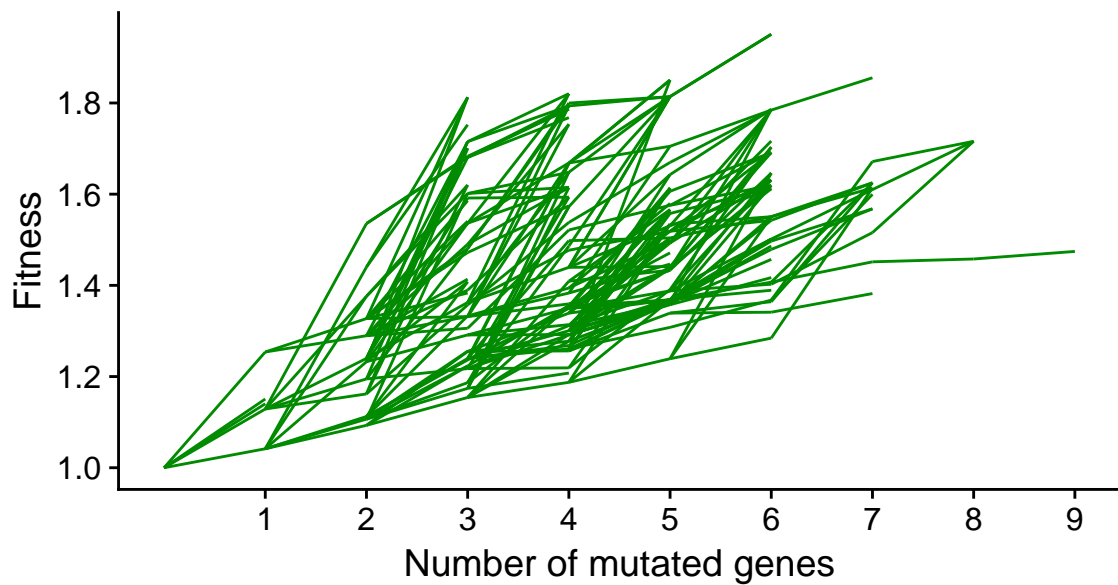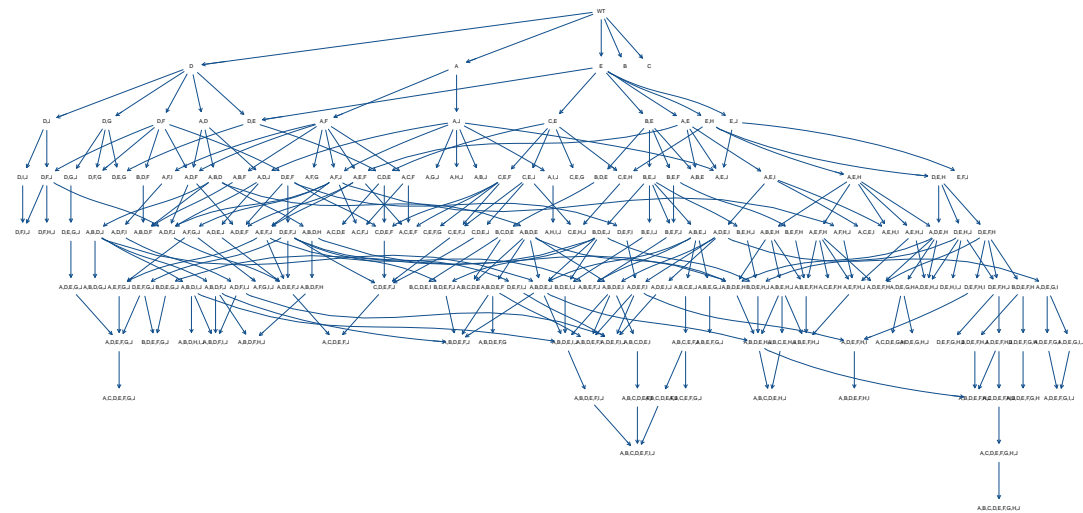

*ID* UOqyH3eyYqb108SQa  
*acc genotypes* 360  
*peaks no back* 71  
*removed edges* NA  
*prop rem edges* NA

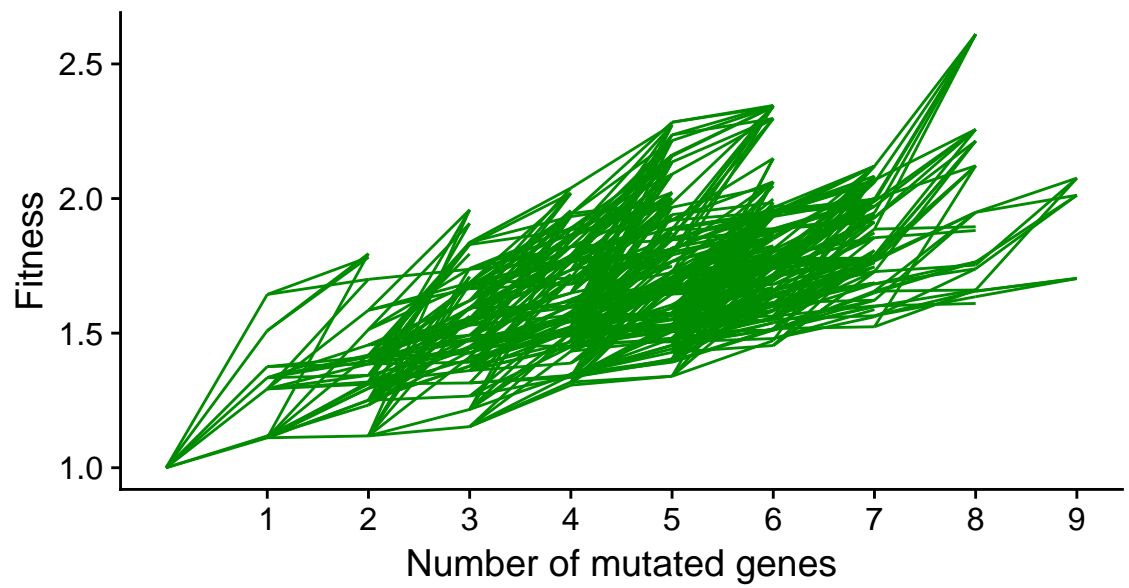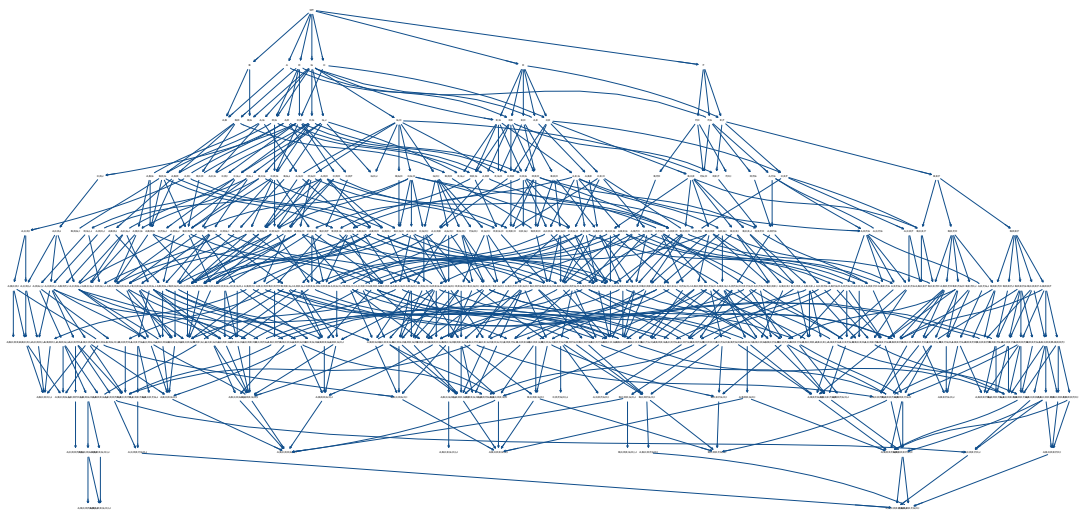

ID UpYY82ecse62Y3kB  
 acc genotypes 102  
 peaks no back 28  
 removed edges NA  
 prop rem edges NA

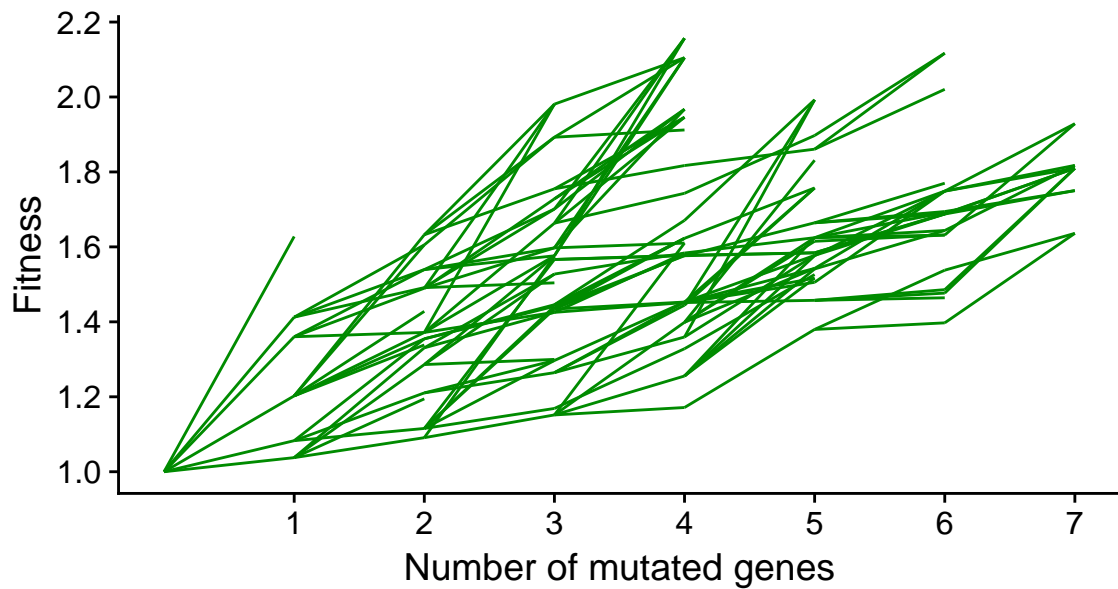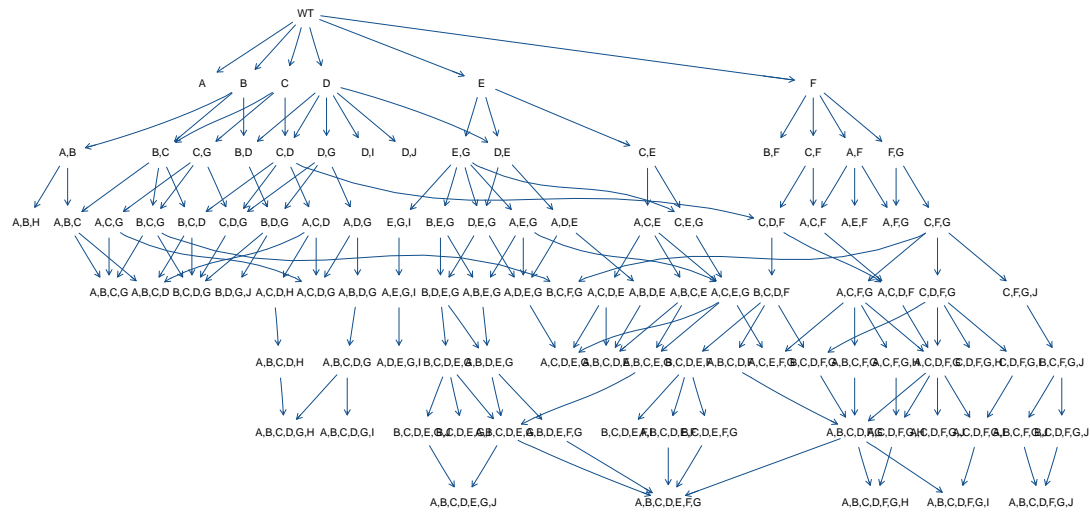



*ID* UR8nbozIYY5kAyVm  
*acc genotypes* 238  
*peaks no back* 54  
*removed edges* NA  
*prop rem edges* NA

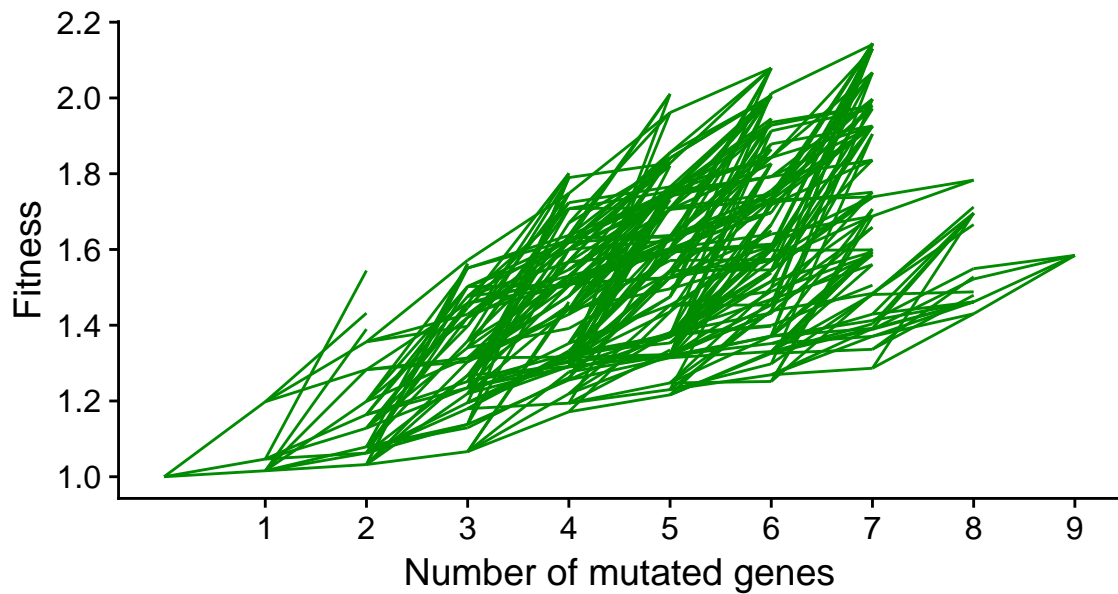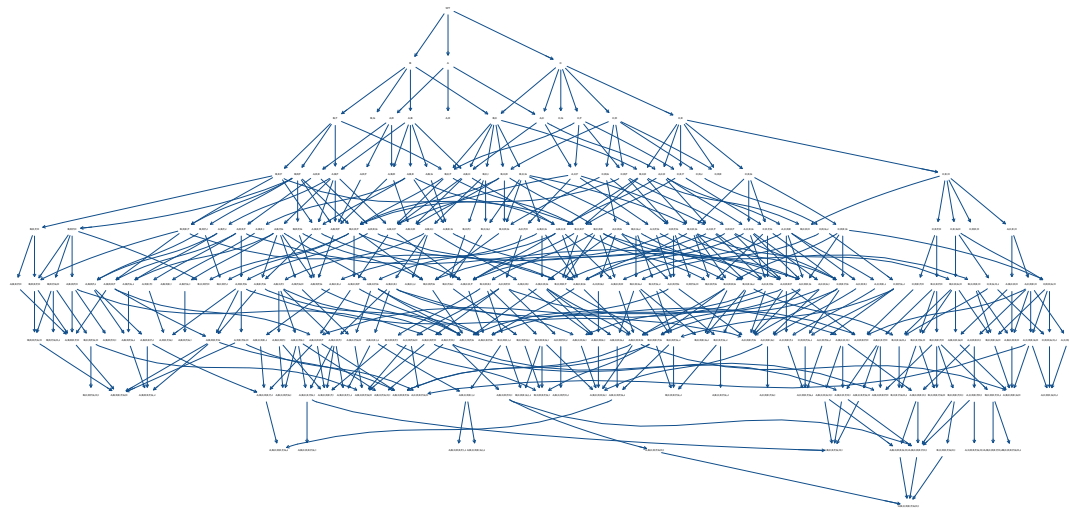

ID **vhfO10CYjbTCUd5Oc**  
 acc genotypes **189**  
 peaks no back **49**  
 removed edges **NA**  
 prop rem edges **NA**

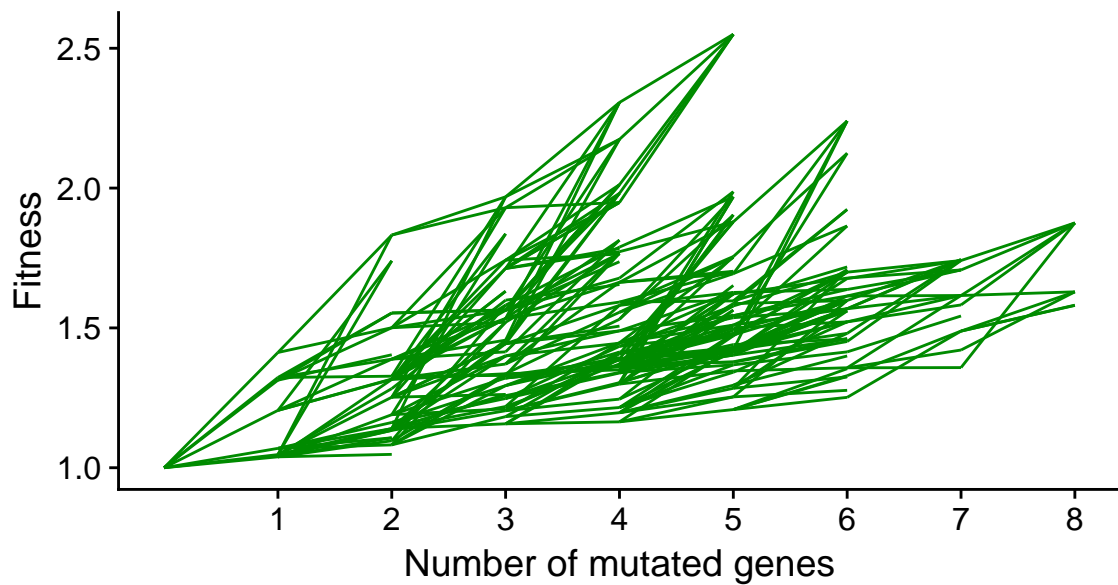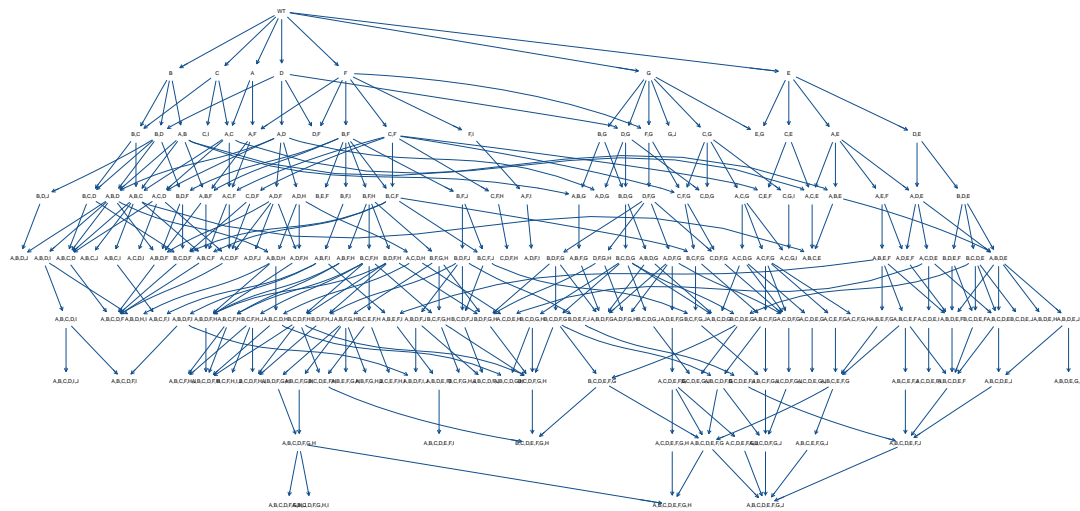

ID VLbJrKnG7tDZJCX7  
acc genotypes 738  
peaks no back 105  
removed edges NA  
prop rem edges NA

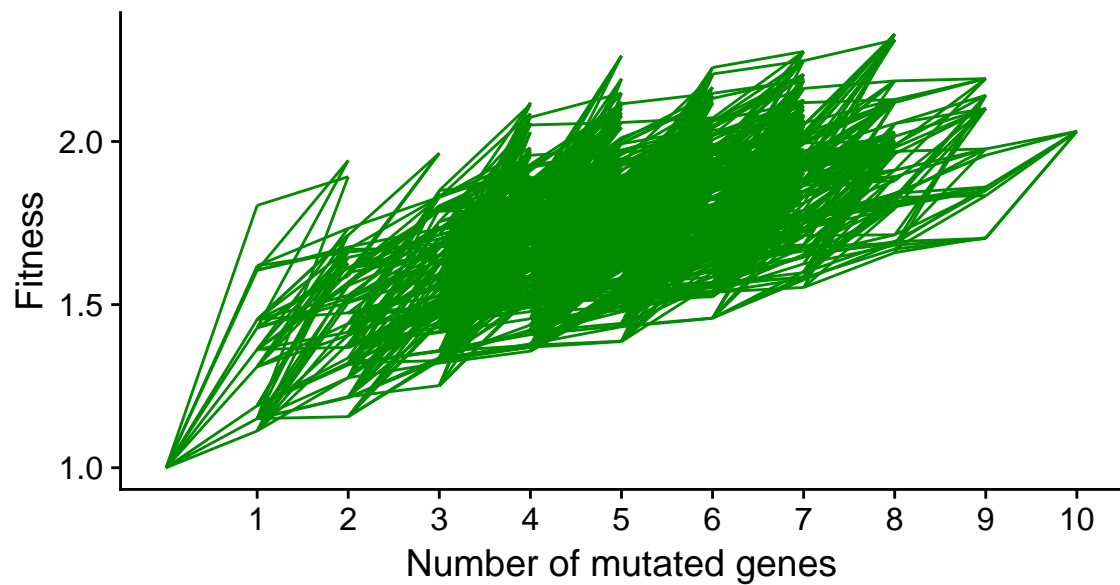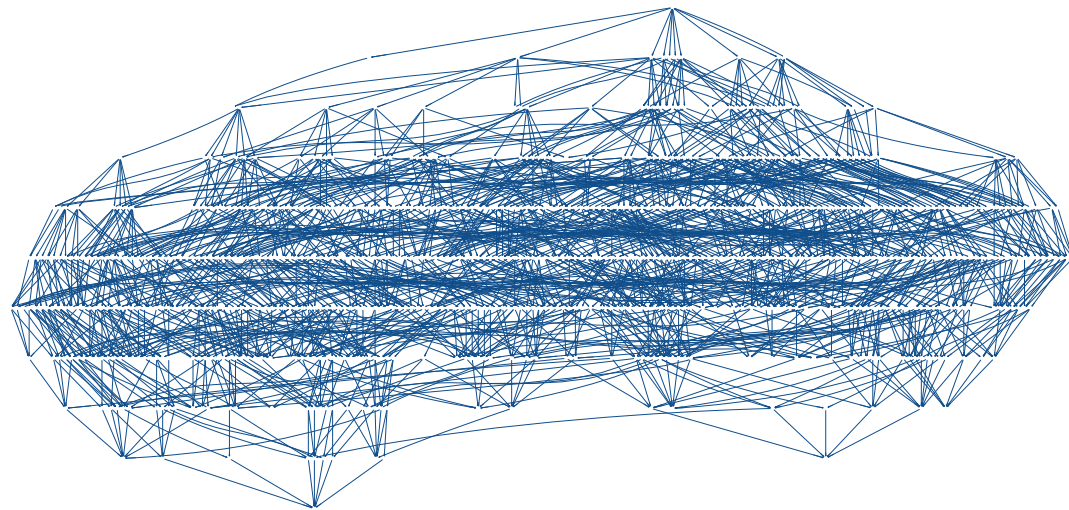

ID vIOhJ52j3mkgx4b0  
 acc genotypes 179  
 peaks no back 73  
 removed edges NA  
 prop rem edges NA

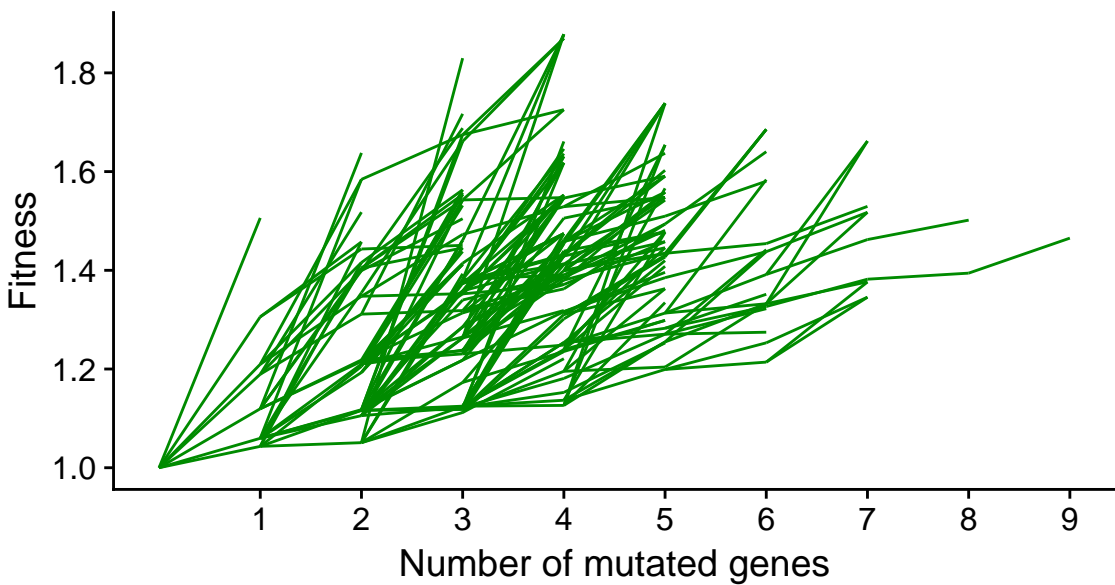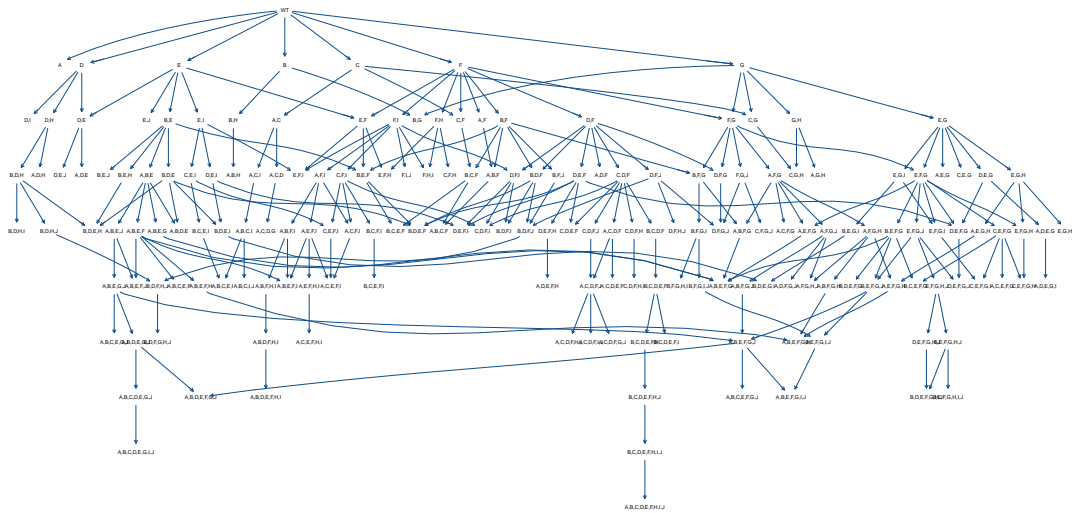

*ID* W10ljZVnZ1043hQUxi  
*acc genotypes* 388  
*peaks no back* 70  
*removed edges* NA  
*prop rem edges* NA

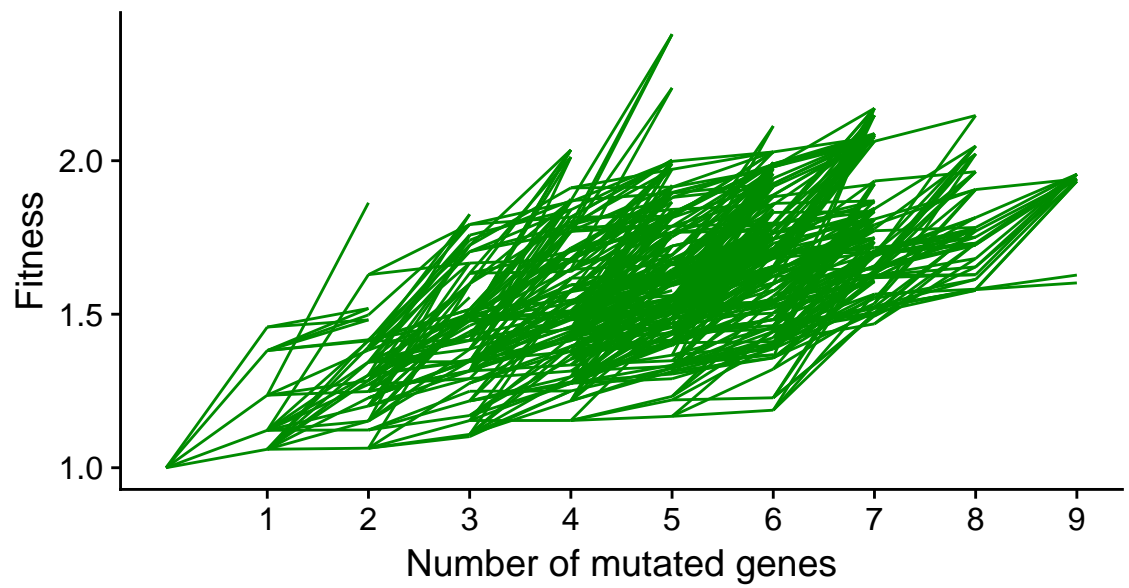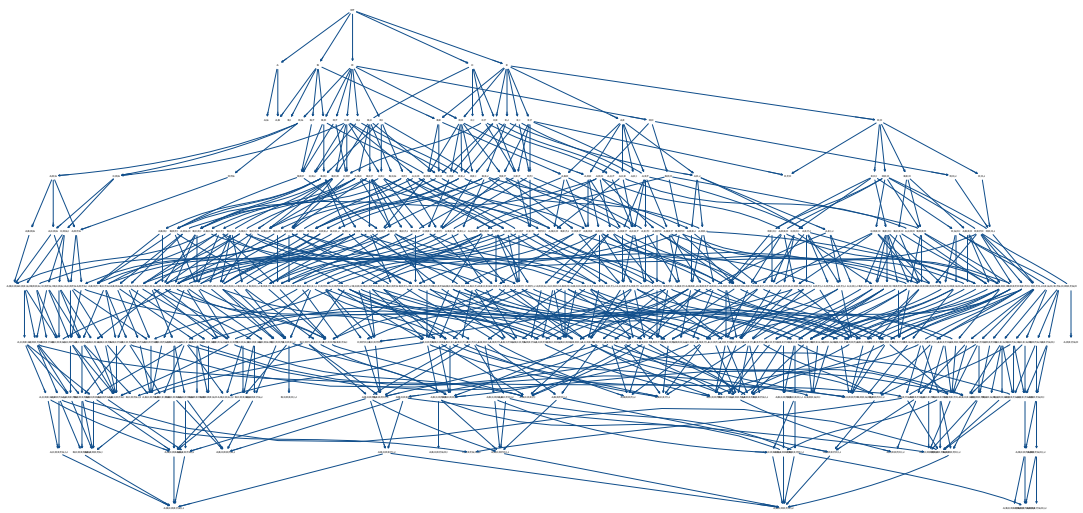

ID **wM4mouEZ5iUOoAtX**  
 acc genotypes **143**  
 peaks no back 52  
 removed edges NA  
 prop rem edges NA

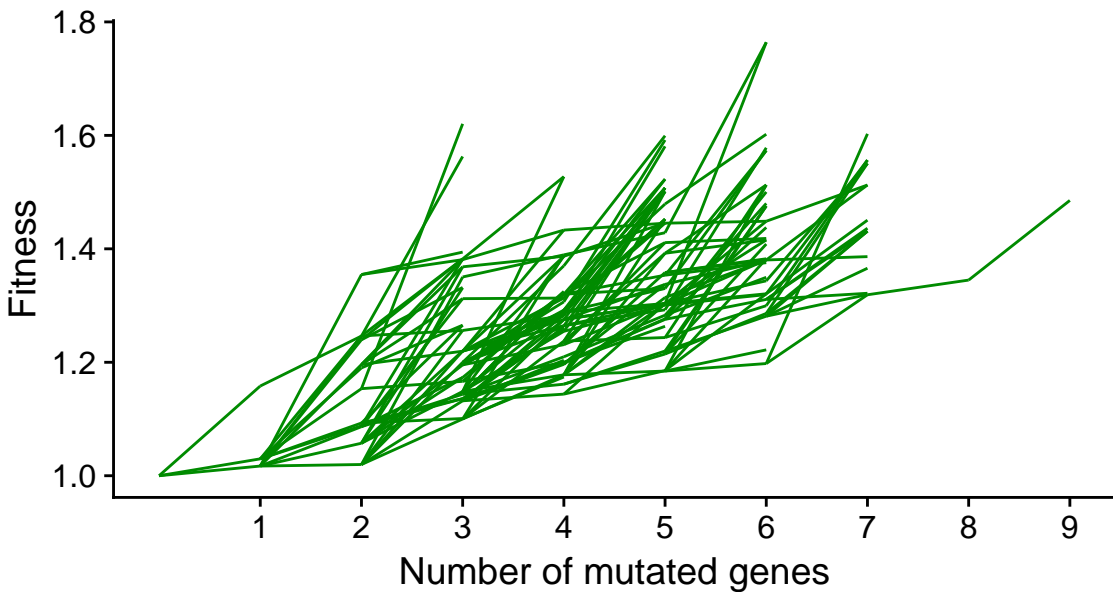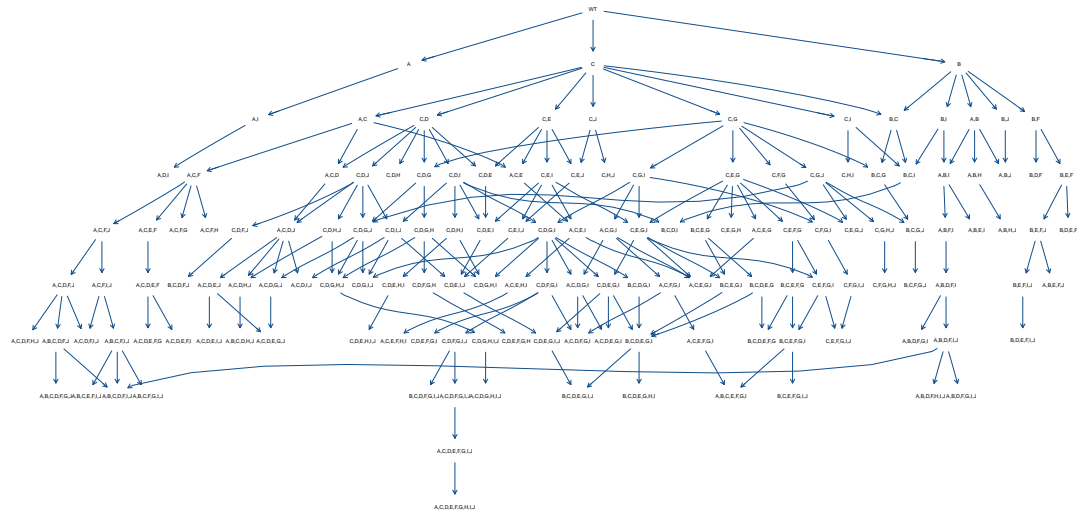

*ID* wOuBIsYKAAzBpTkz  
*acc genotypes* 191  
*peaks no back* 69  
*removed edges* NA  
*prop rem edges* NA

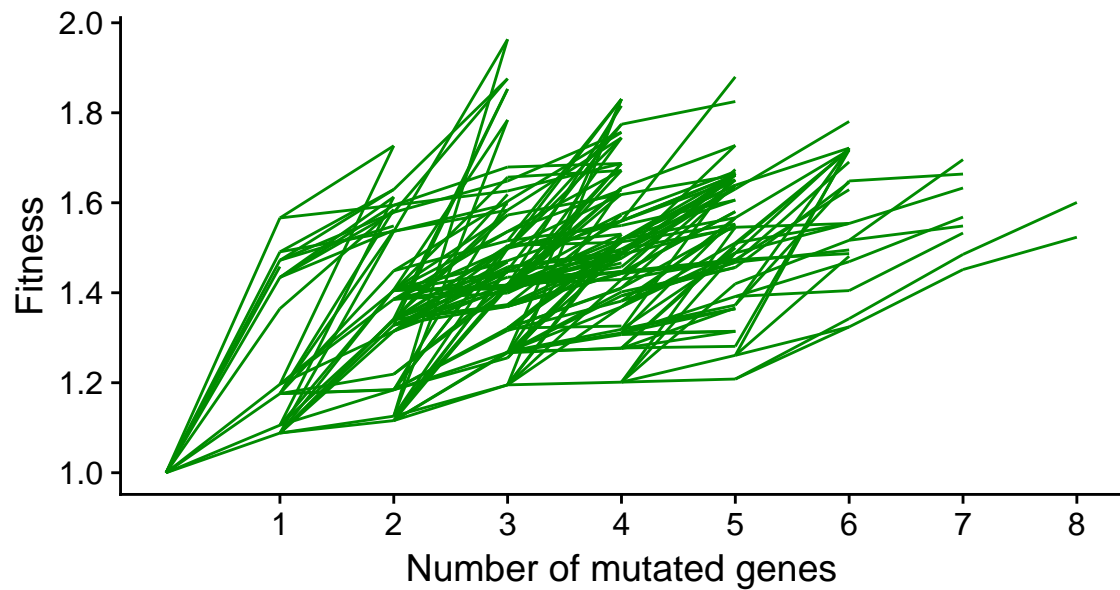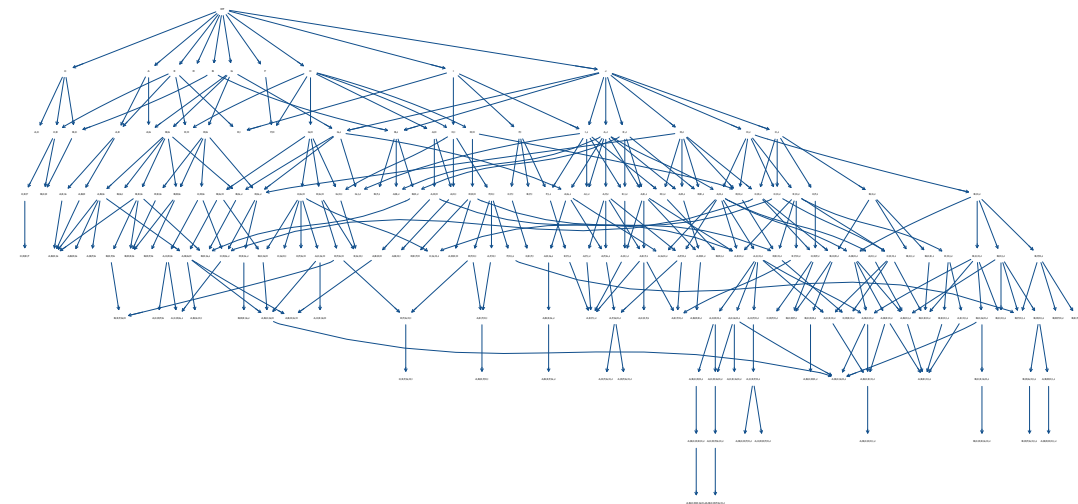

*ID* wuF5q9kOxSCRE7RX  
*acc genotypes* 728  
*peaks no back* 82  
*removed edges* NA  
*prop rem edges* NA

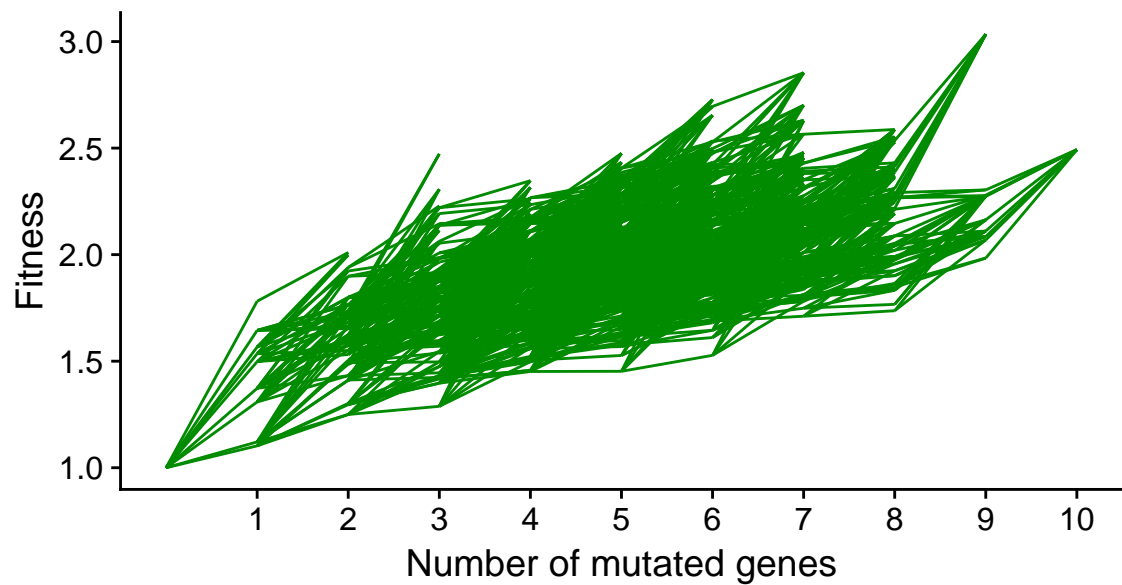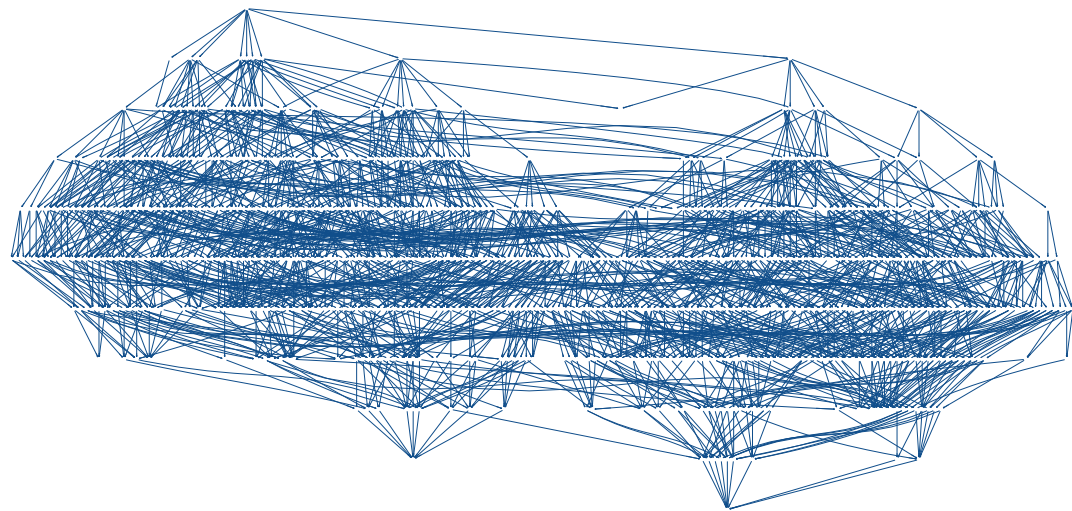



*ID* wwBtyDIZSVYRmVqi  
*acc genotypes* 222  
*peaks no back* 83  
*removed edges* NA  
*prop rem edges* NA

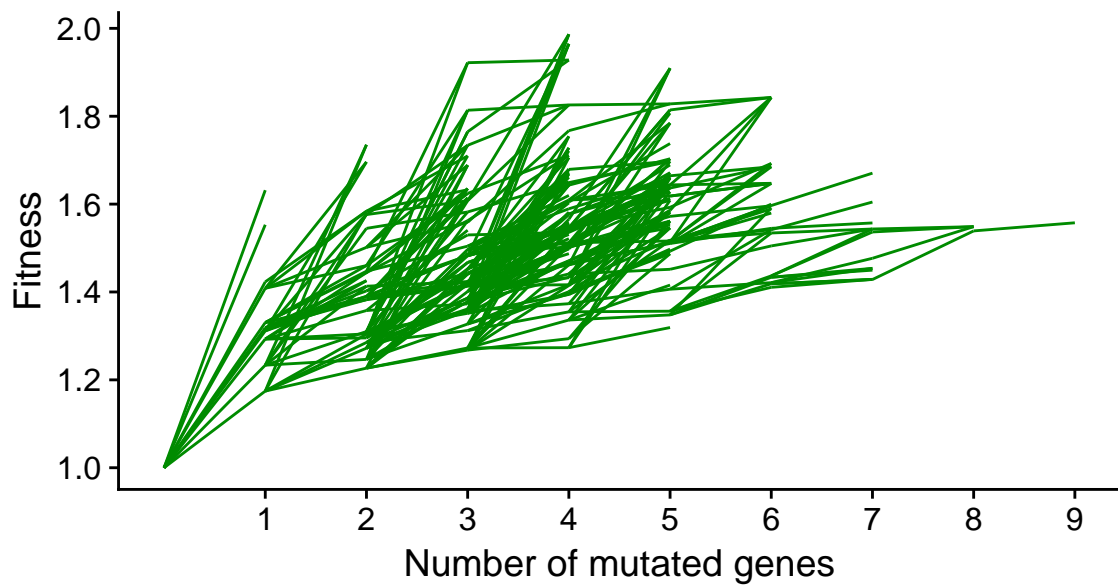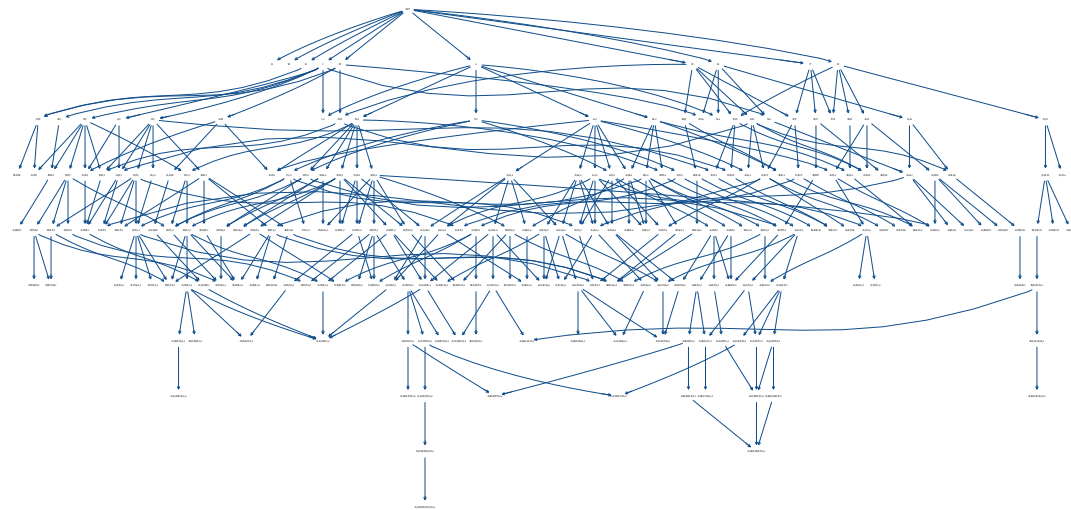

ID wXZJGUyFMo10NI4dV  
 acc genotypes 89  
 peaks no back 42  
 removed edges NA  
 prop rem edges NA

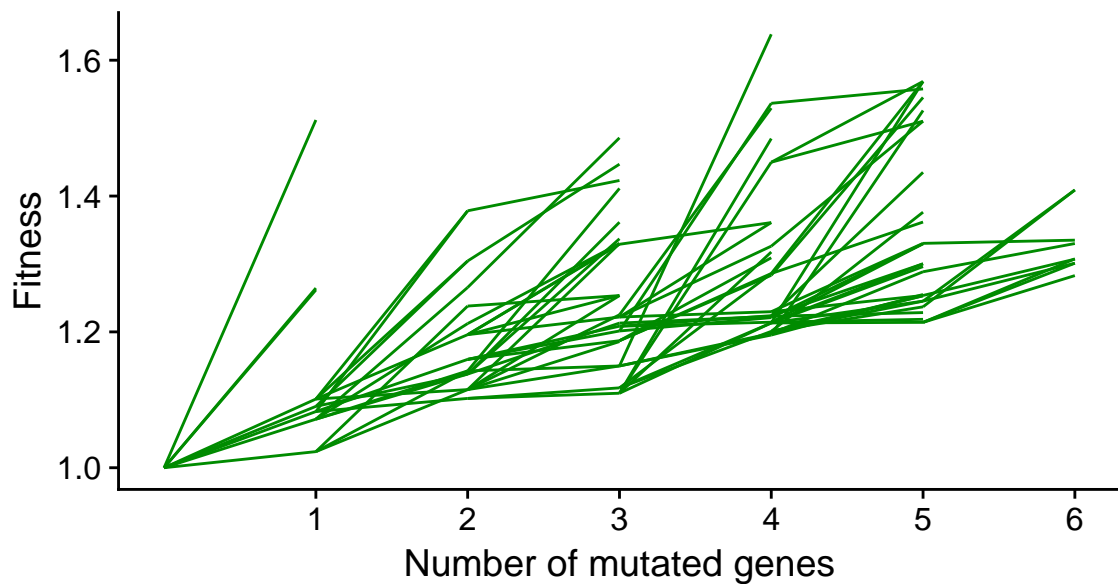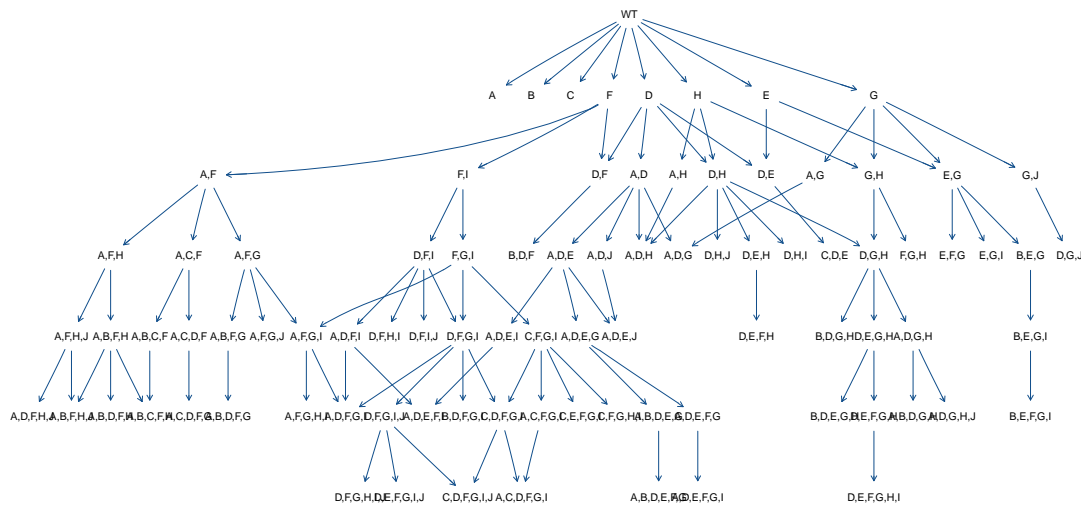

*ID* WYBRgQ10JLk3RhGLo  
*acc genotypes* 433  
*peaks no back* 115  
*removed edges* NA  
*prop rem edges* NA

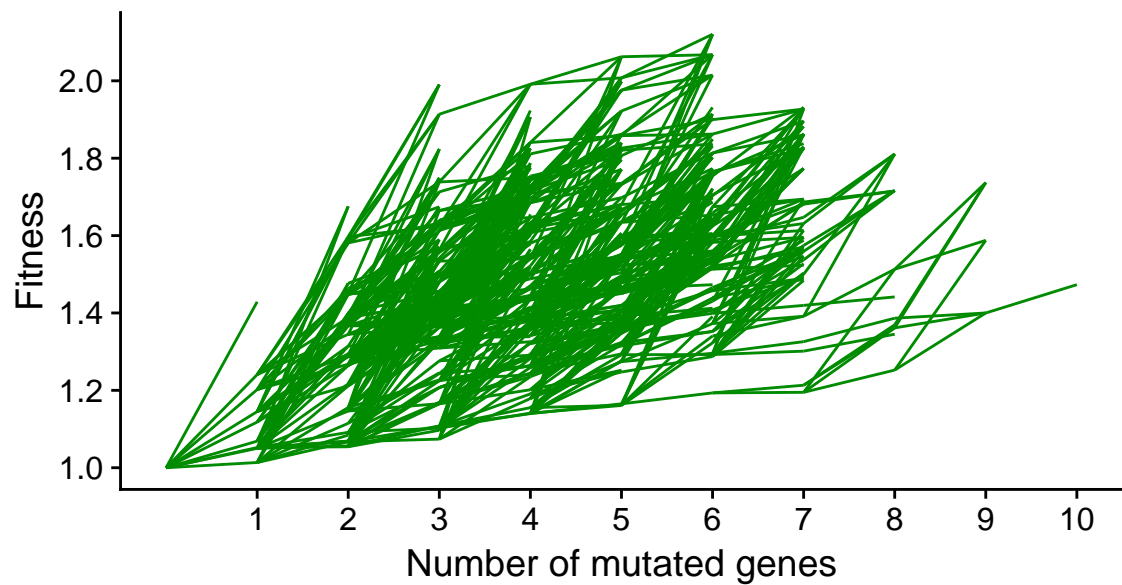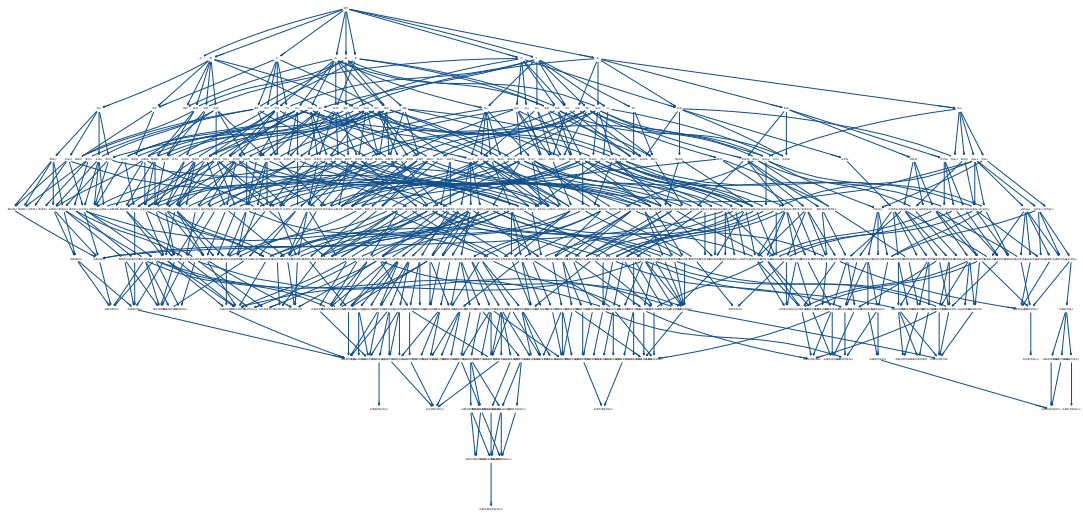

ID WZ96wrbzeKdxcOJ3  
 acc genotypes 141  
 peaks no back 57  
 removed edges NA  
 prop rem edges NA

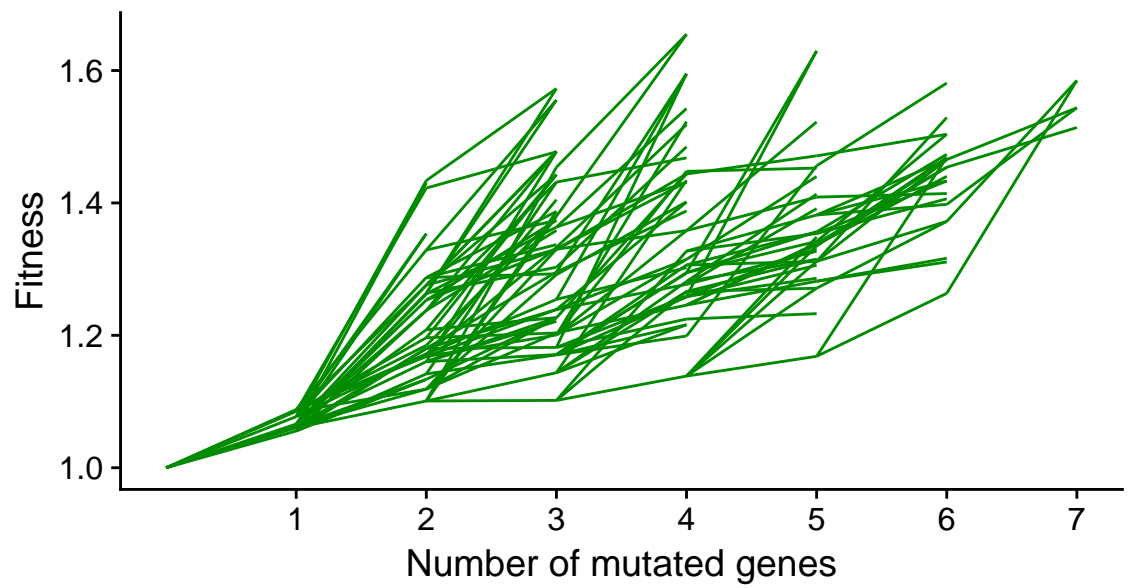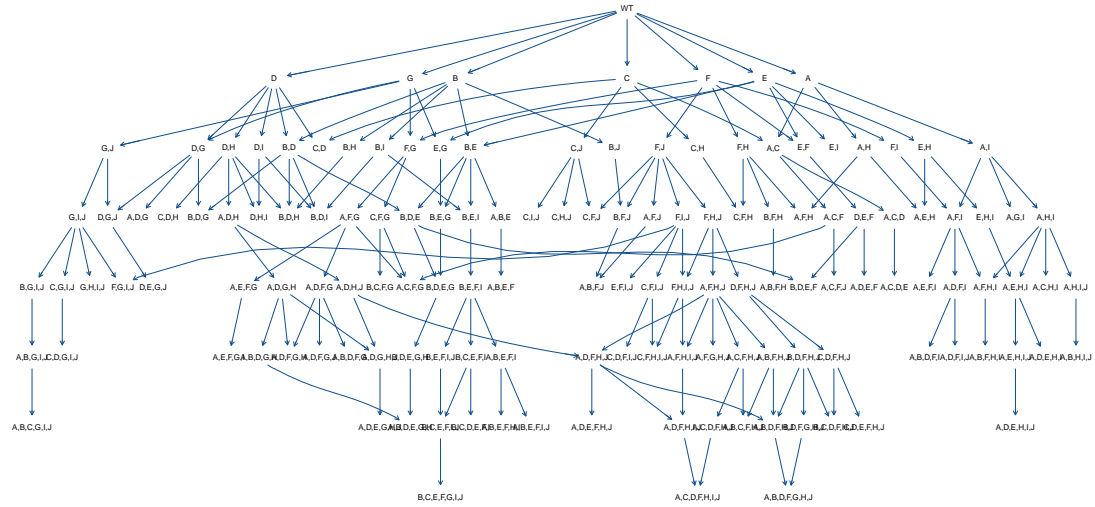

ID X6Z5TgU29GZVilQy  
acc genotypes 620  
peaks no back 75  
removed edges NA  
prop rem edges NA

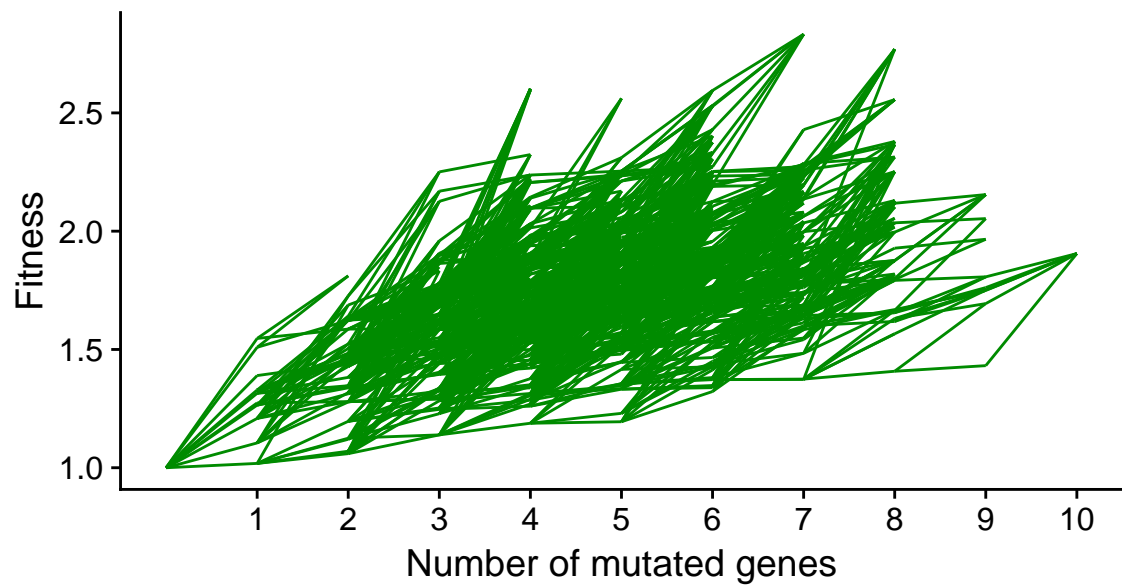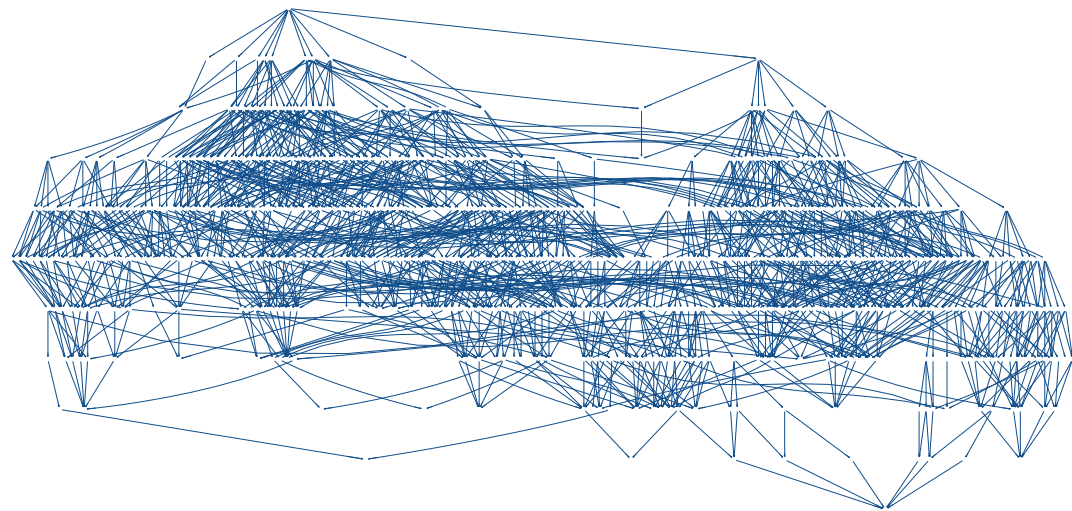

*ID* x8IUOobt10WI39iG2  
*acc genotypes* 209  
*peaks no back* 81  
*removed edges* NA  
*prop rem edges* NA

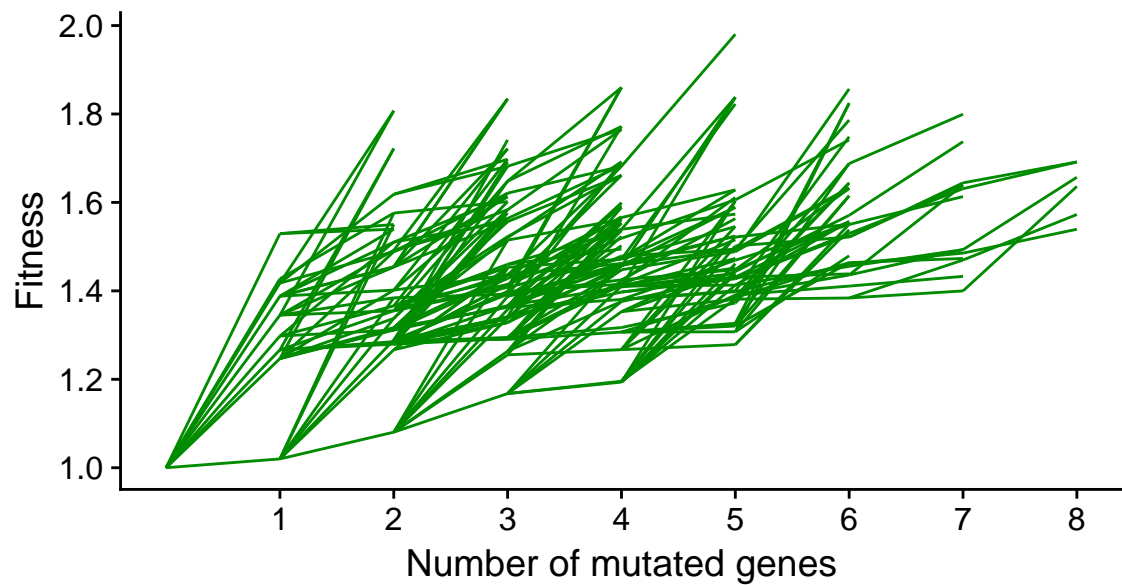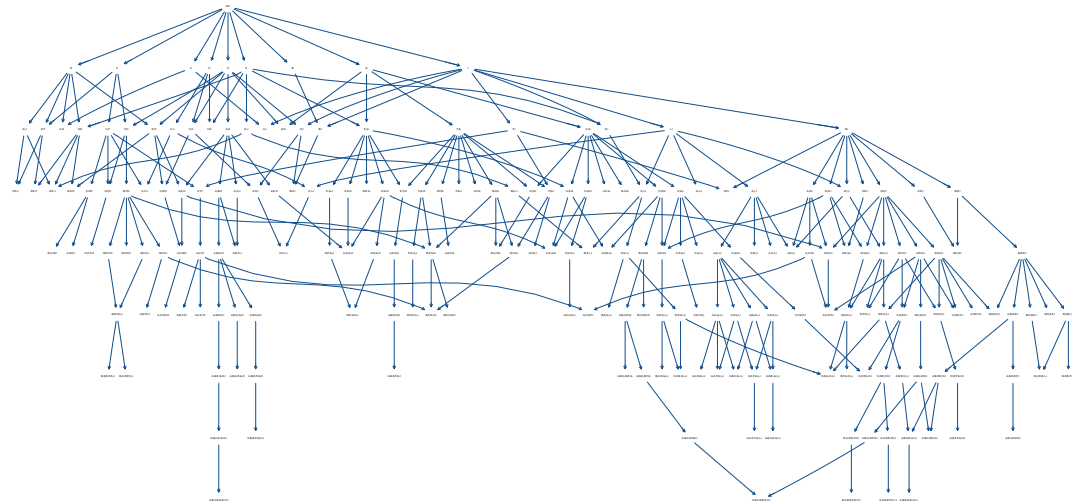

ID **xcdQXsmxI7kh5NDZ**  
 acc genotypes **184**  
 peaks no back **73**  
 removed edges **NA**  
 prop rem edges **NA**

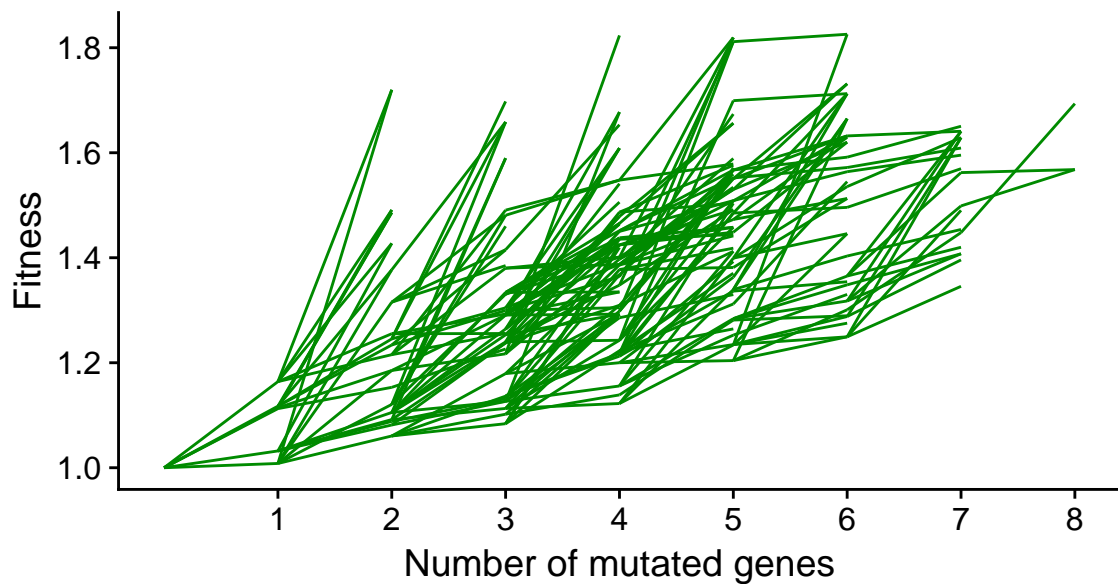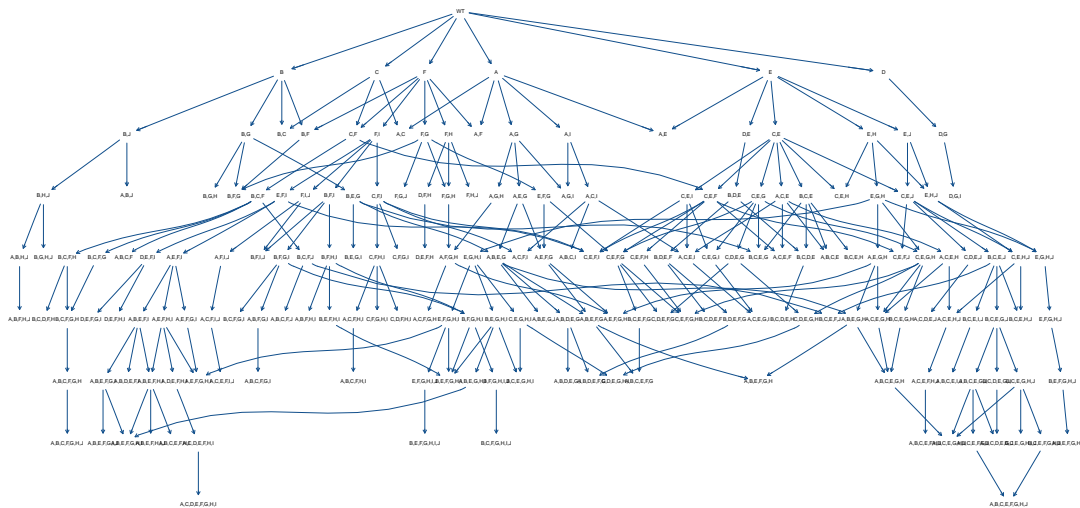

*ID* Xh10HKozlpe9ybd7i  
*acc genotypes* 200  
*peaks no back* 89  
*removed edges* NA  
*prop rem edges* NA

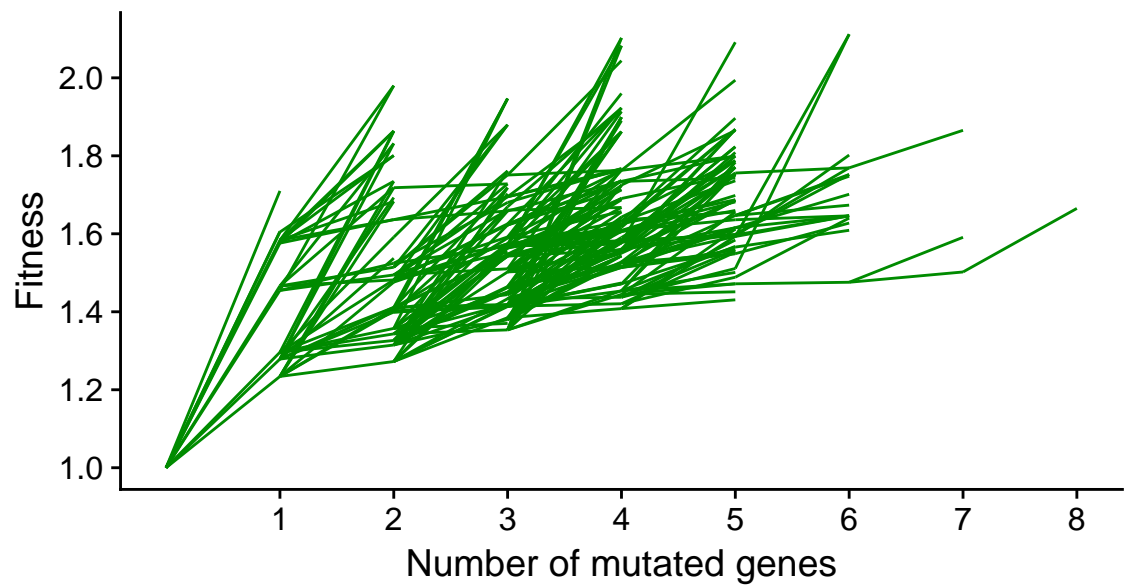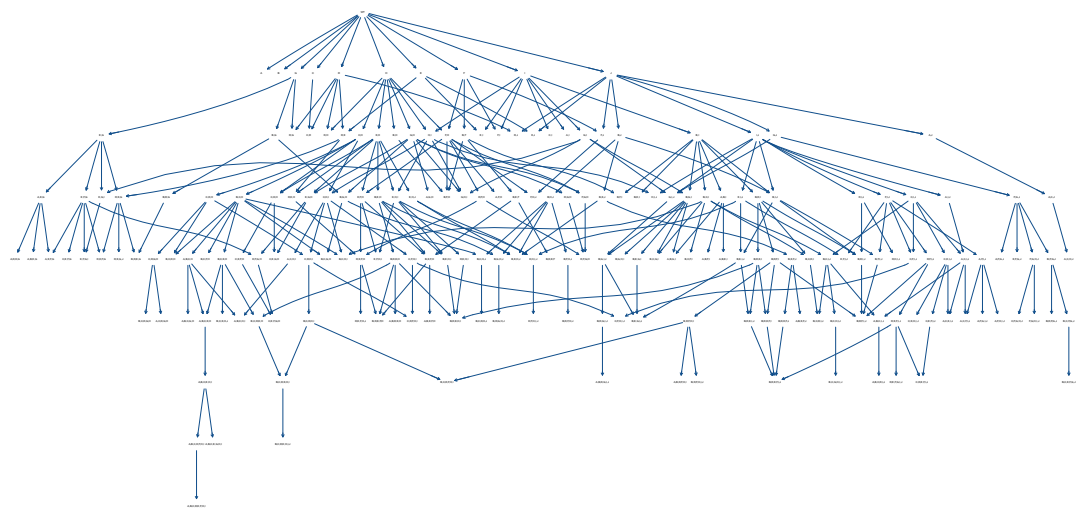



*ID* XKTMaTNASYWPIHNI  
*acc genotypes* 352  
*peaks no back* 105  
*removed edges* NA  
*prop rem edges* NA

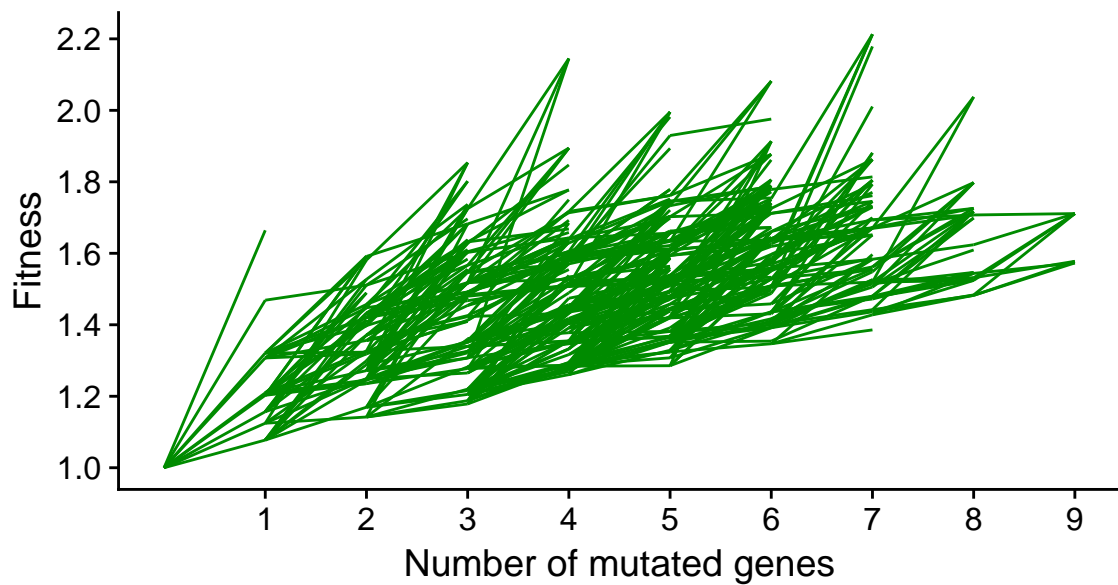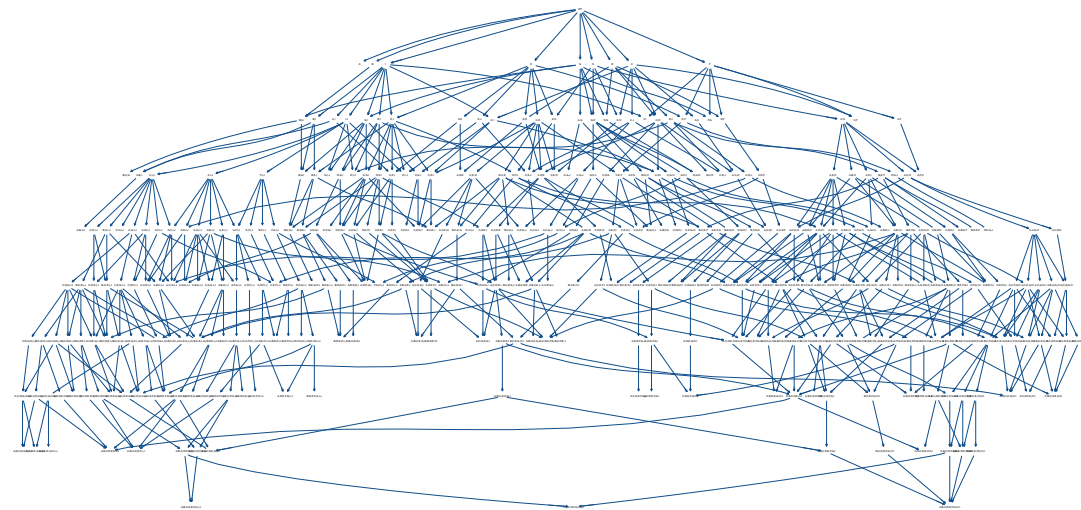

ID XNRZEeV3I3oHG9g1  
acc genotypes 424  
peaks no back 121  
removed edges NA  
prop rem edges NA

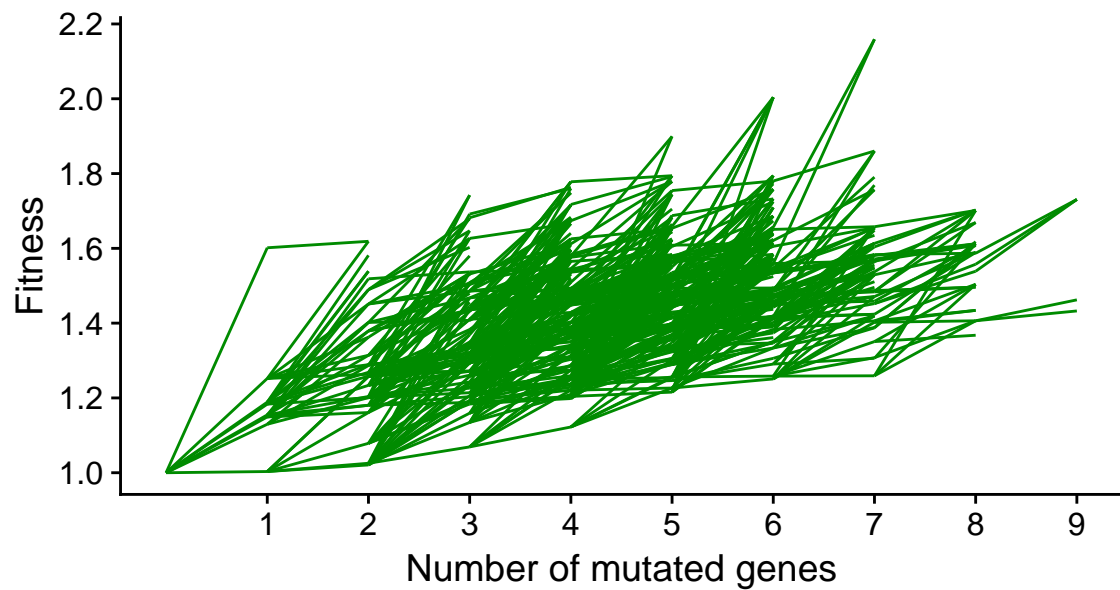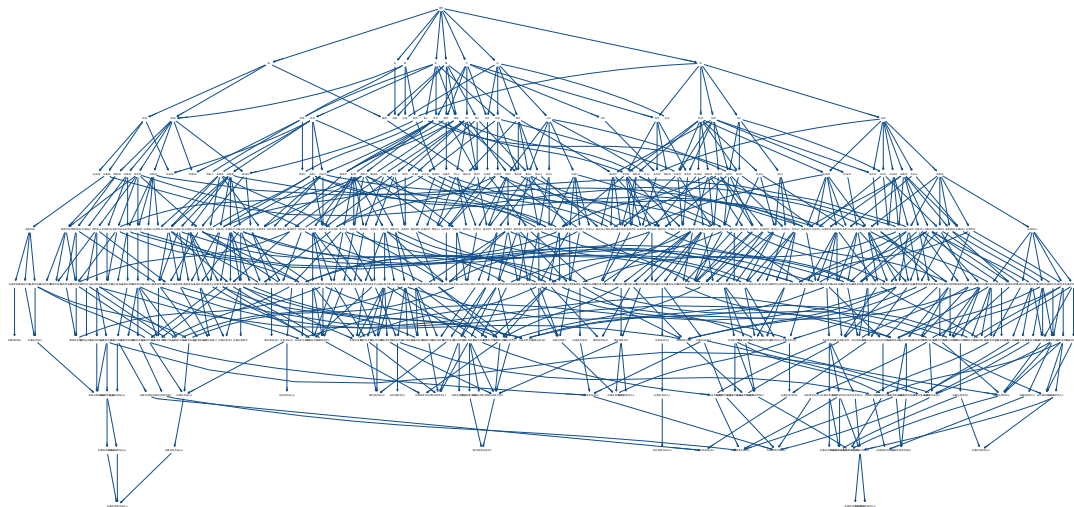

ID XrjsetS7KL5noi92  
 acc genotypes 89  
 peaks no back 26  
 removed edges NA  
 prop rem edges NA

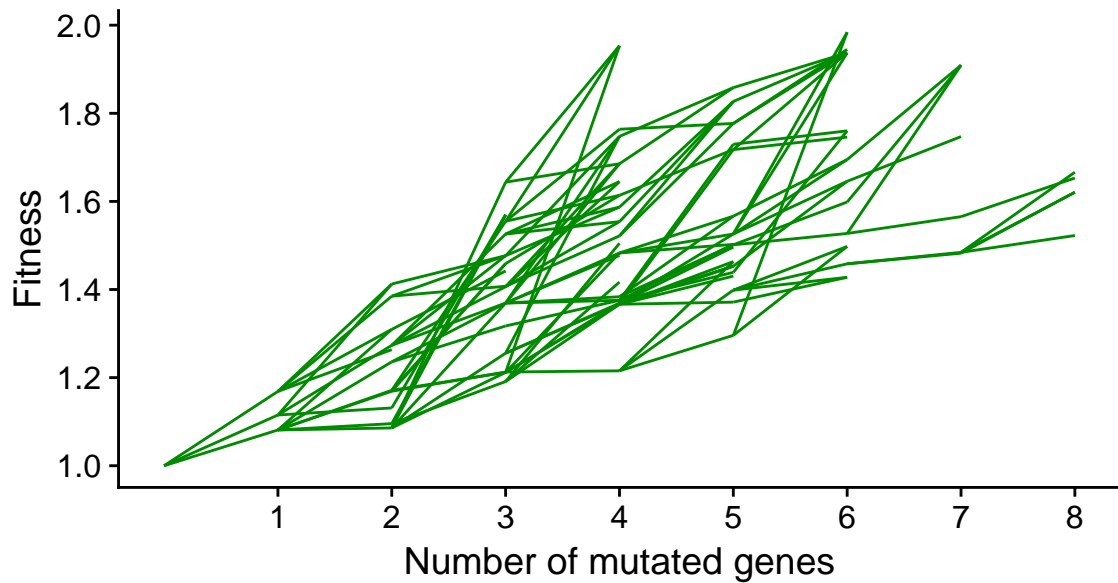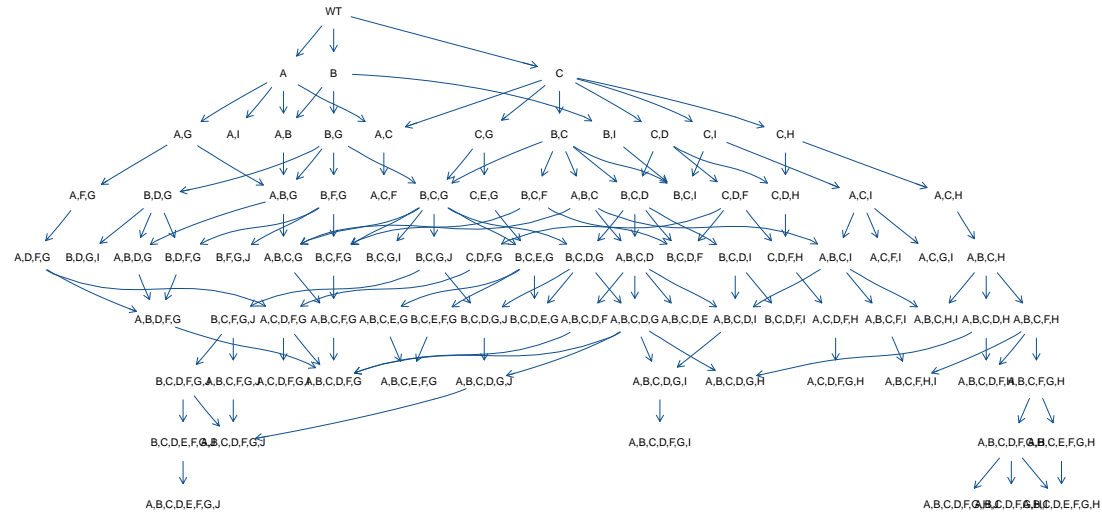

ID xvHgdwCzOGa7Ev7e  
 acc genotypes 55  
 peaks no back 19  
 removed edges NA  
 prop rem edges NA

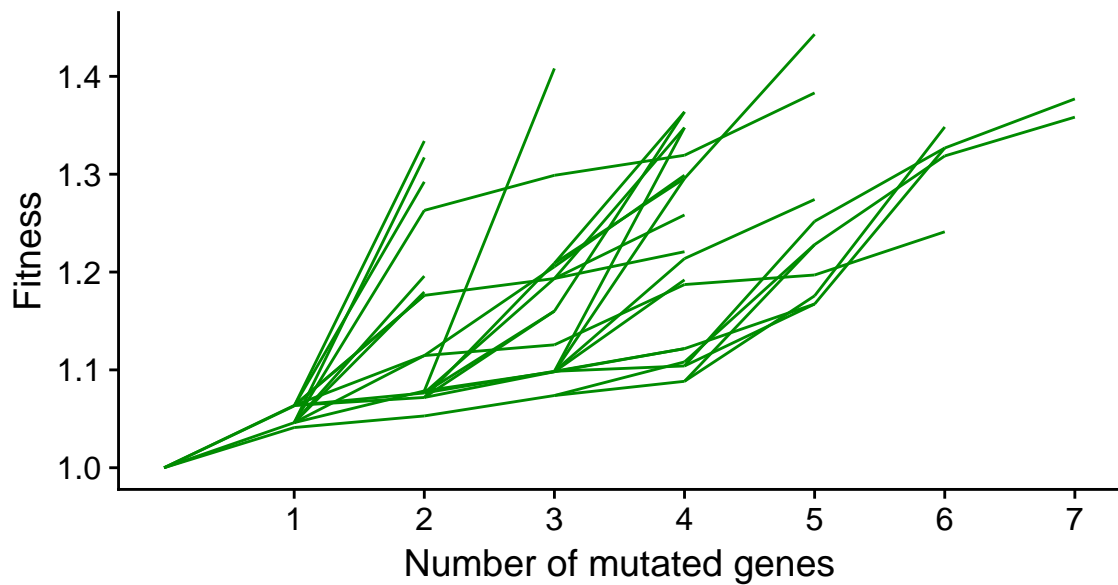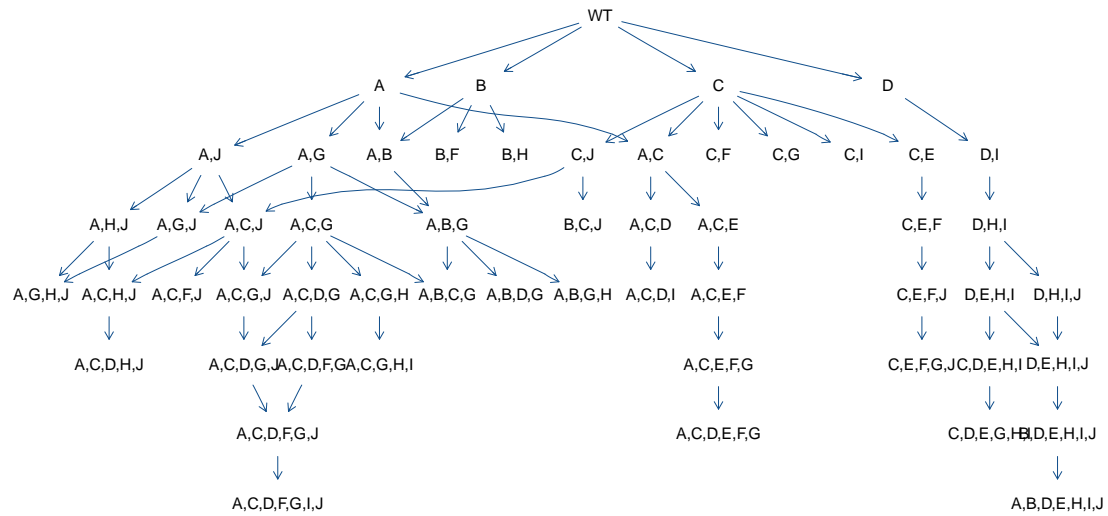

ID **xwEXGxQHVPacEqsW**  
 acc genotypes **67**  
 peaks no back **26**  
 removed edges **NA**  
 prop rem edges **NA**

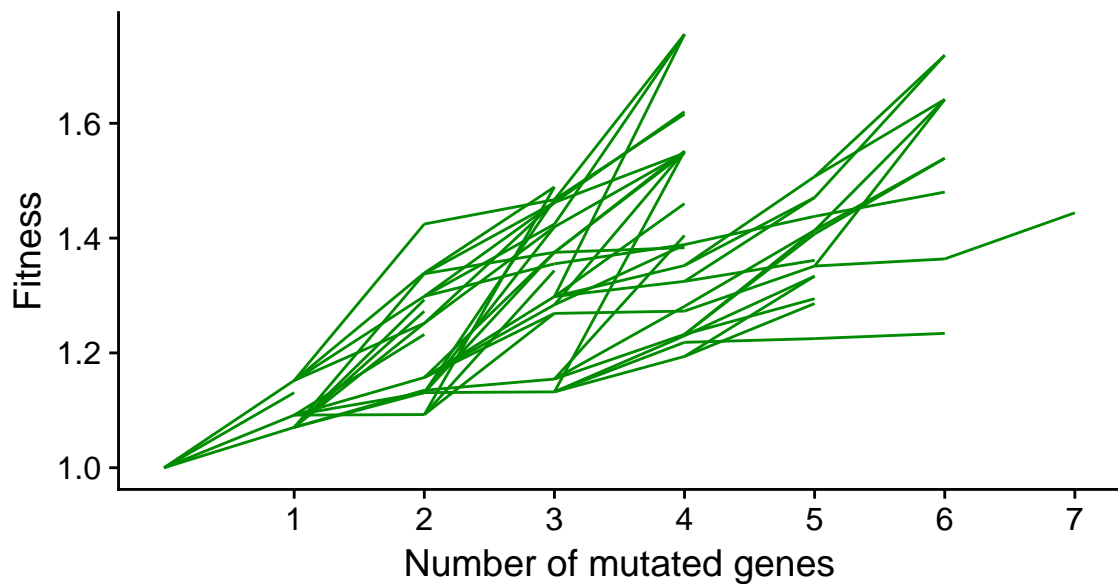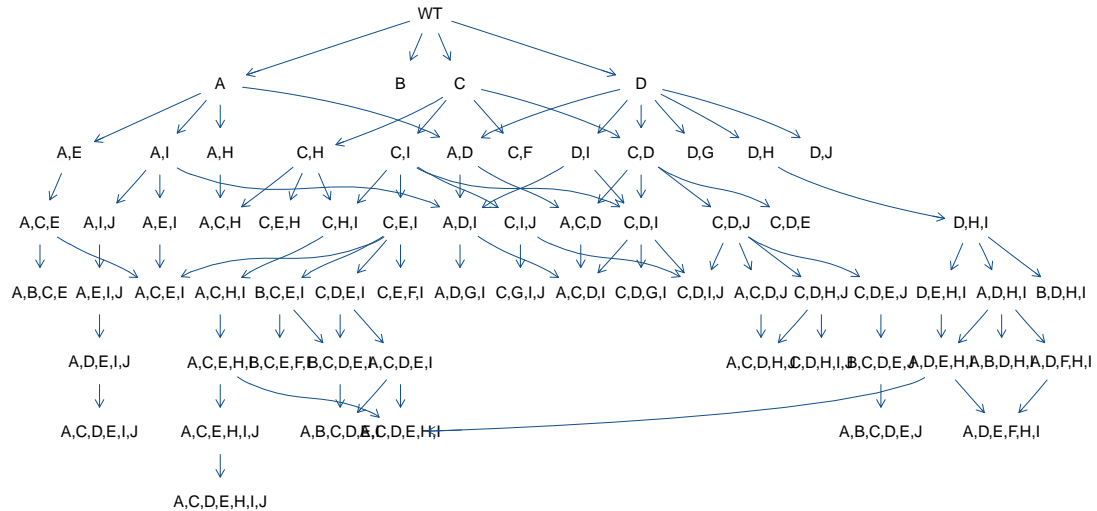

*ID* xZ632I1FnE2fDF10q  
*acc genotypes* 663  
*peaks no back* 72  
*removed edges* NA  
*prop rem edges* NA

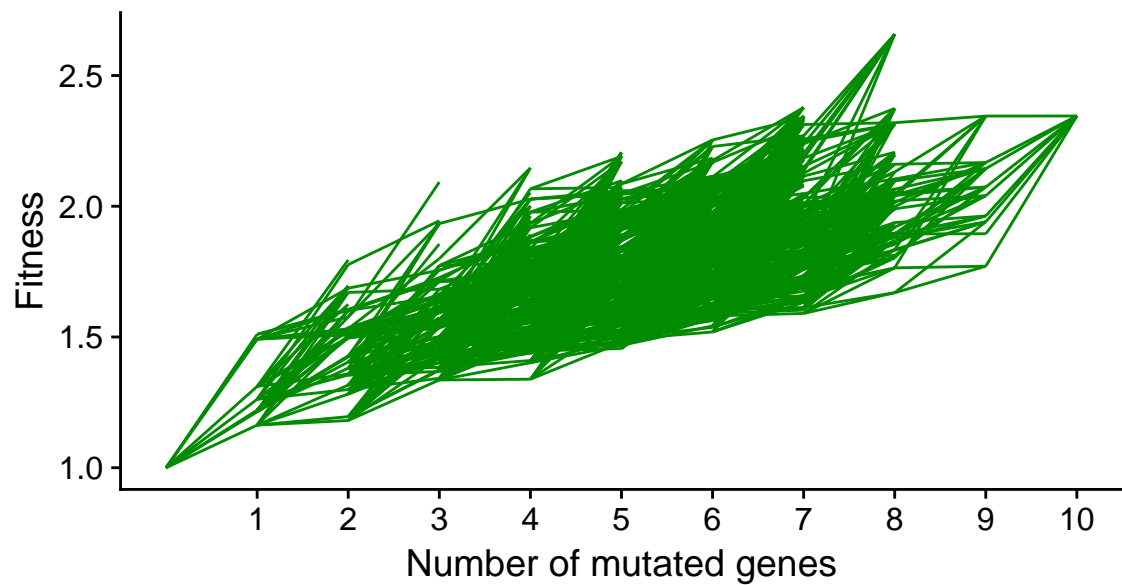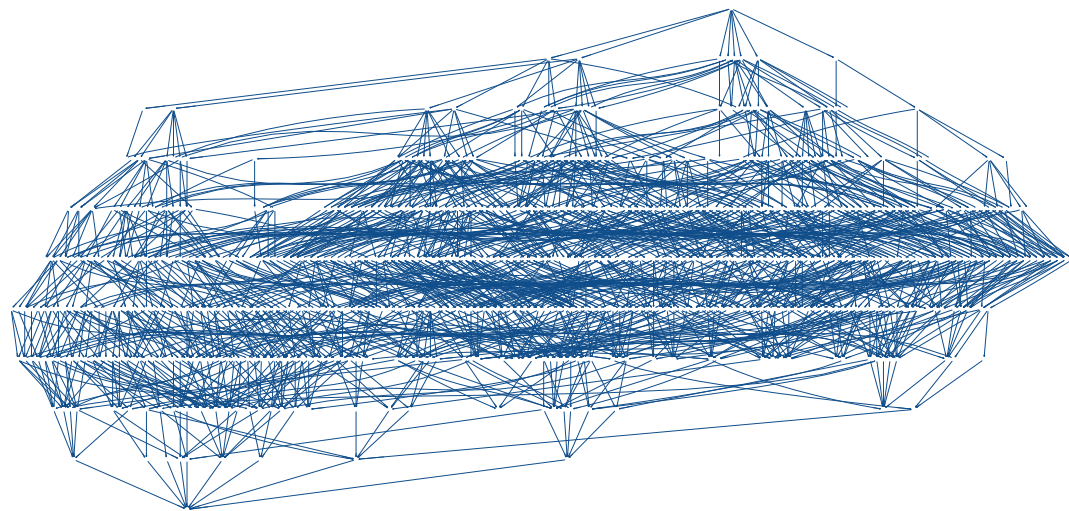

ID y5oNzDs3V3q7y3ih  
acc genotypes 297  
peaks no back 91  
removed edges NA  
prop rem edges NA

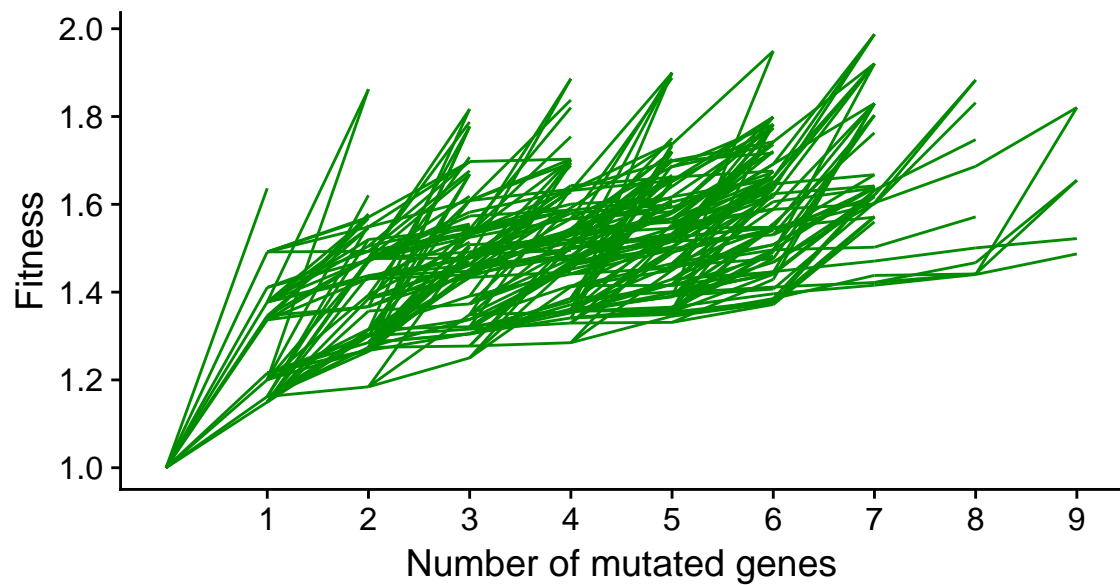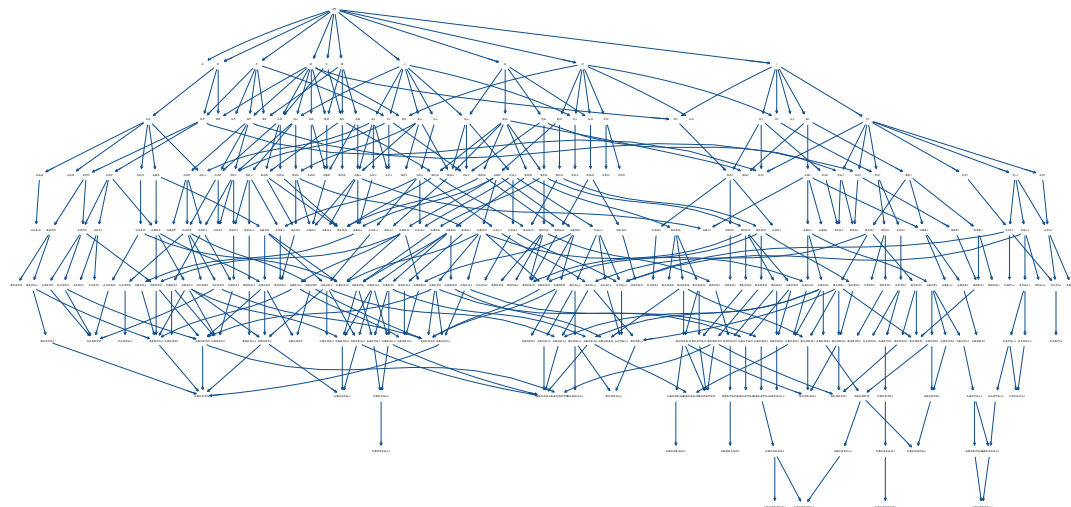

ID YeUw4gB10IT8FRdhX  
 acc genotypes 110  
 peaks no back 46  
 removed edges NA  
 prop rem edges NA

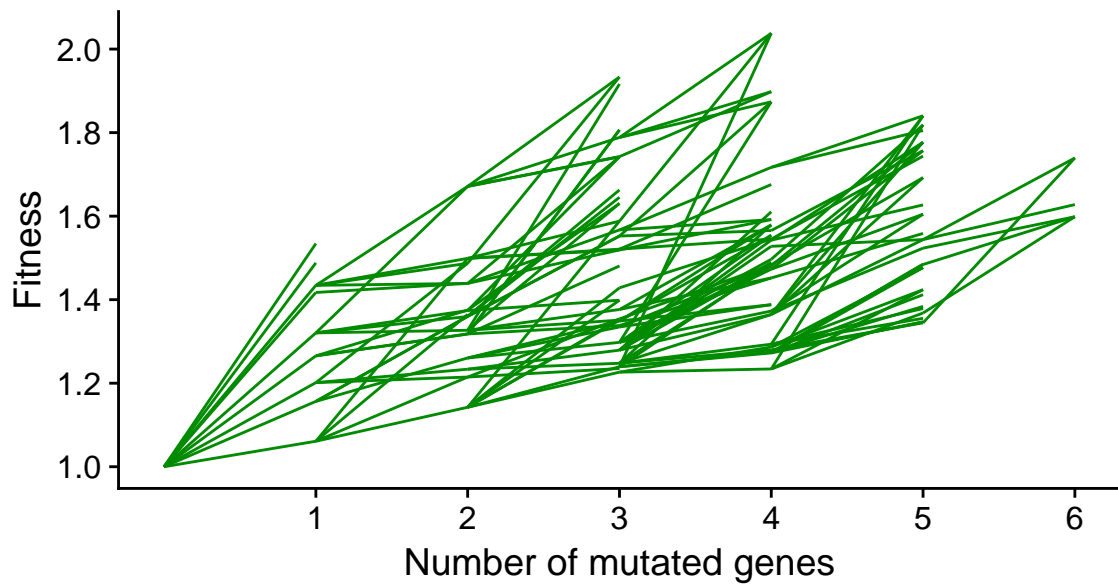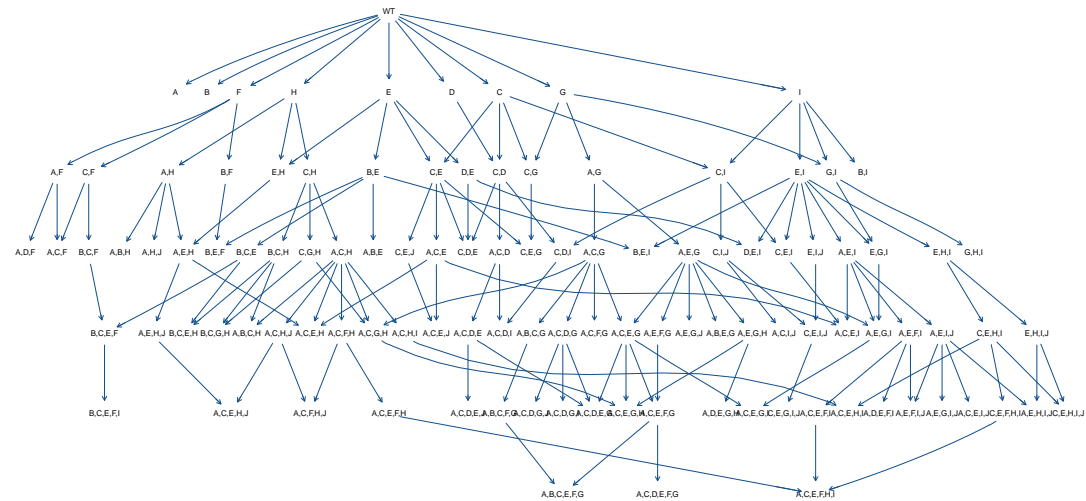



ID Yg8zLevZ7wA4DC3B  
acc genotypes 147  
peaks no back 48  
removed edges NA  
prop rem edges NA

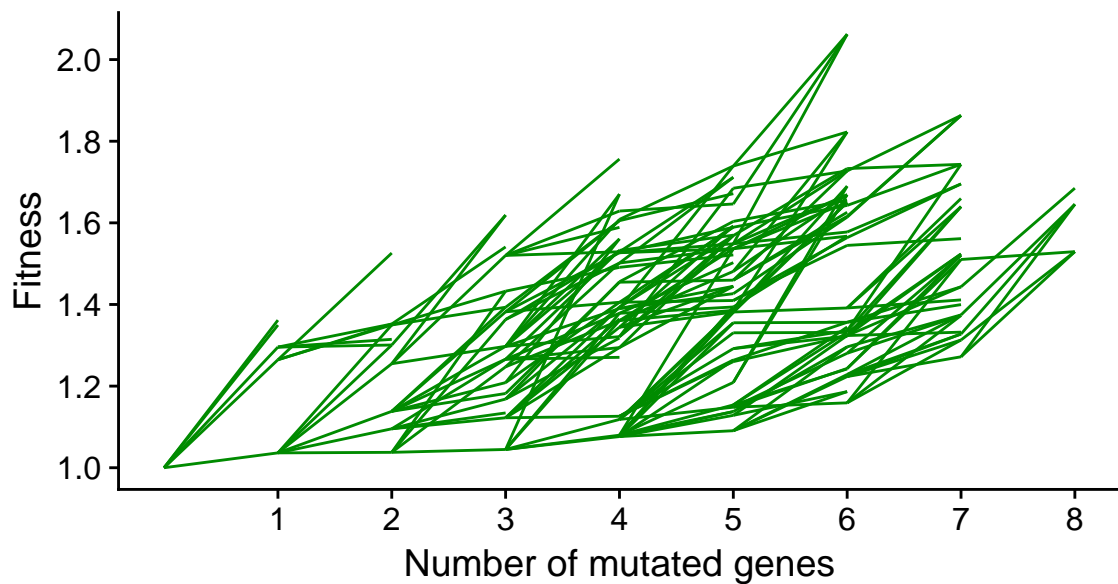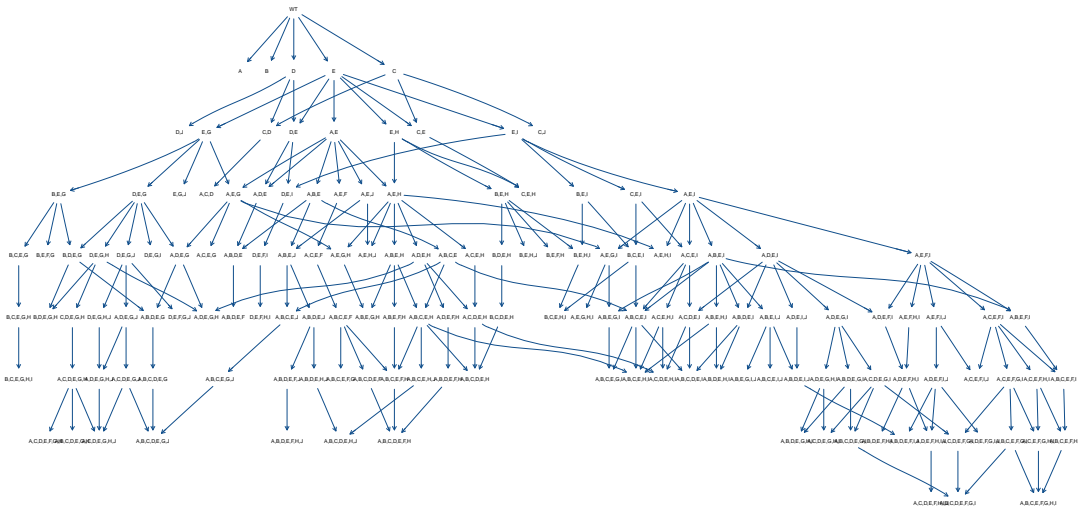

ID YqlzMXE6SnRITBq5  
 acc genotypes 73  
 peaks no back 37  
 removed edges NA  
 prop rem edges NA

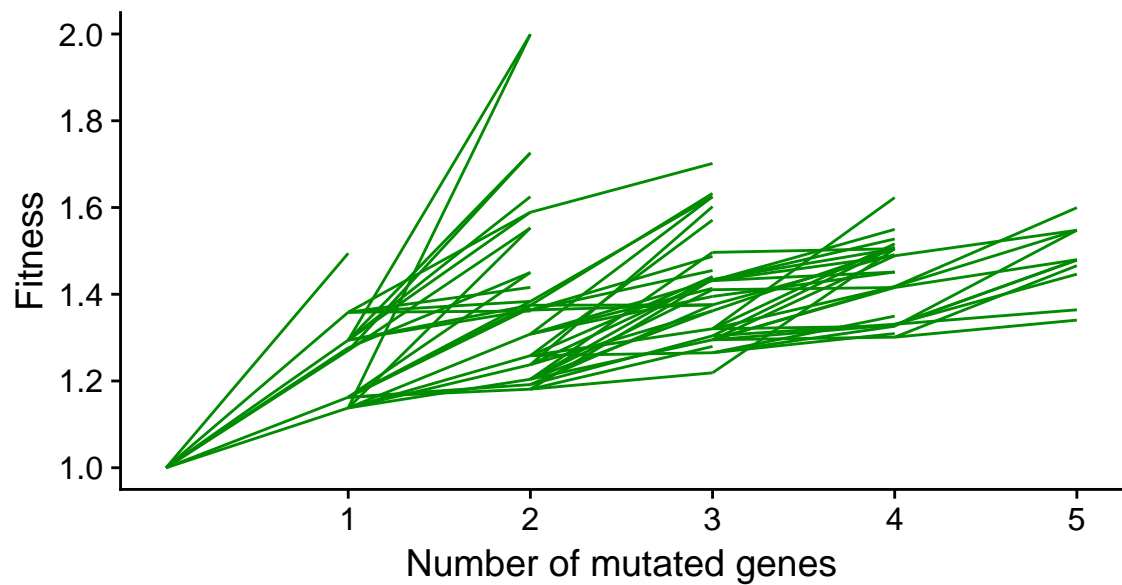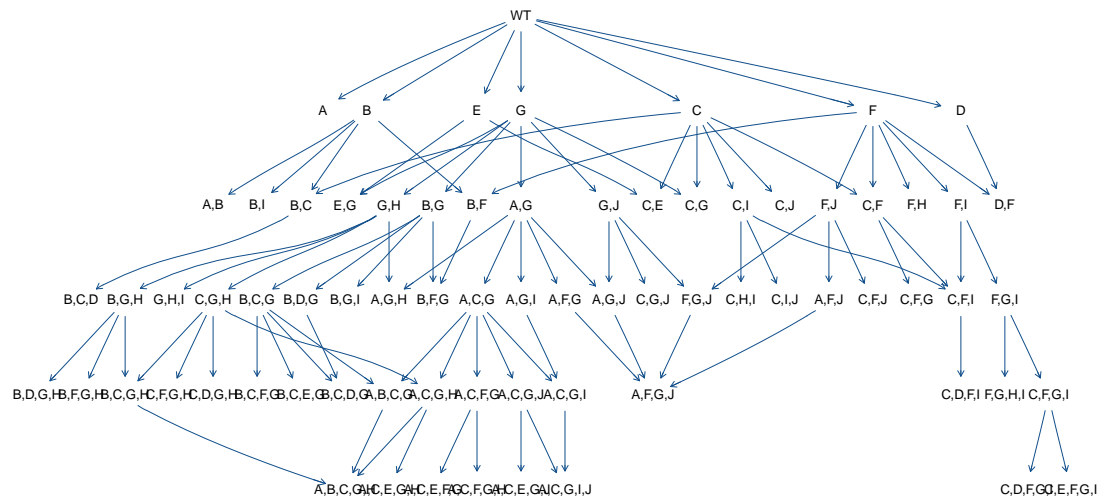

*ID* YSwbWvqbUeR10s1p8  
*acc genotypes* 279  
*peaks no back* 73  
*removed edges* NA  
*prop rem edges* NA

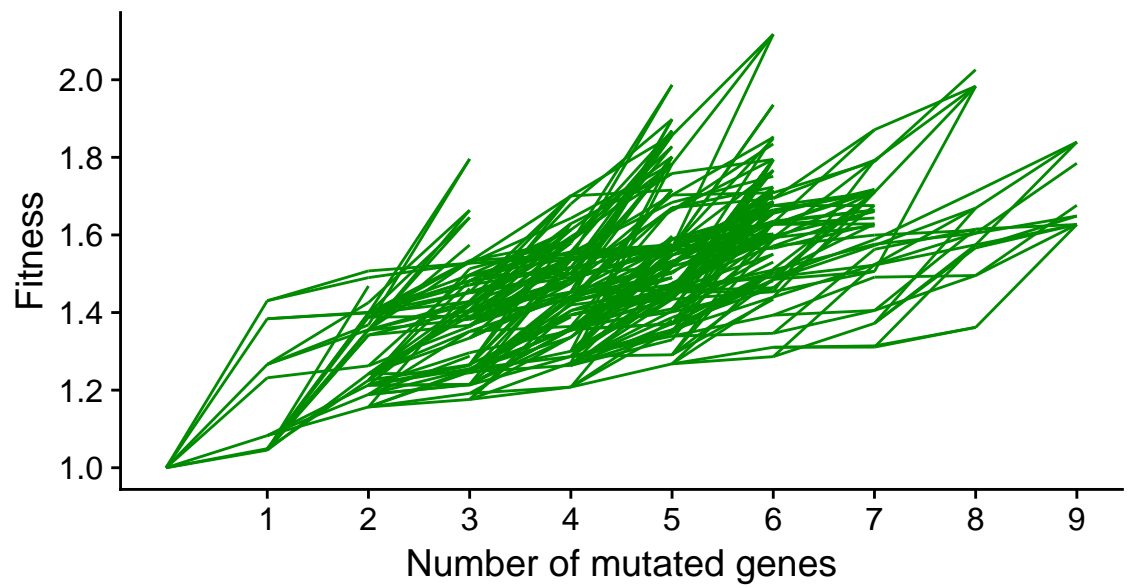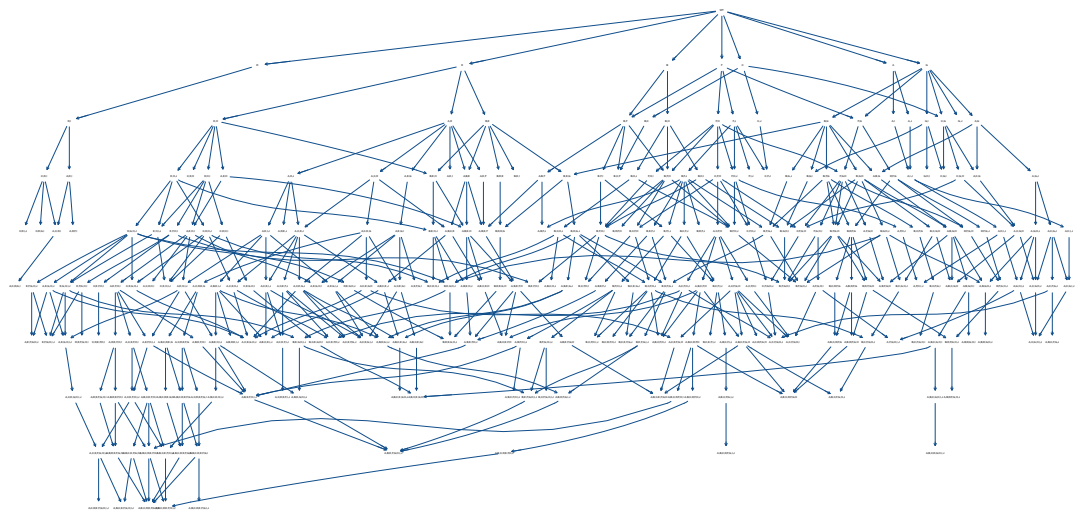

*ID* zaGCXdhS1IAYBVFr  
*acc genotypes* 242  
*peaks no back* 91  
*removed edges* NA  
*prop rem edges* NA

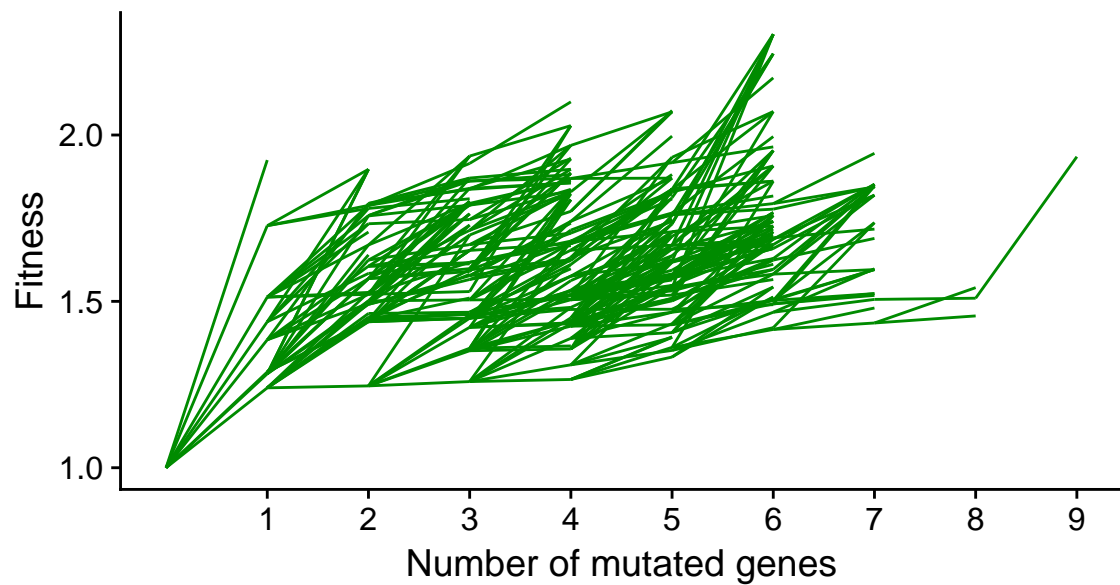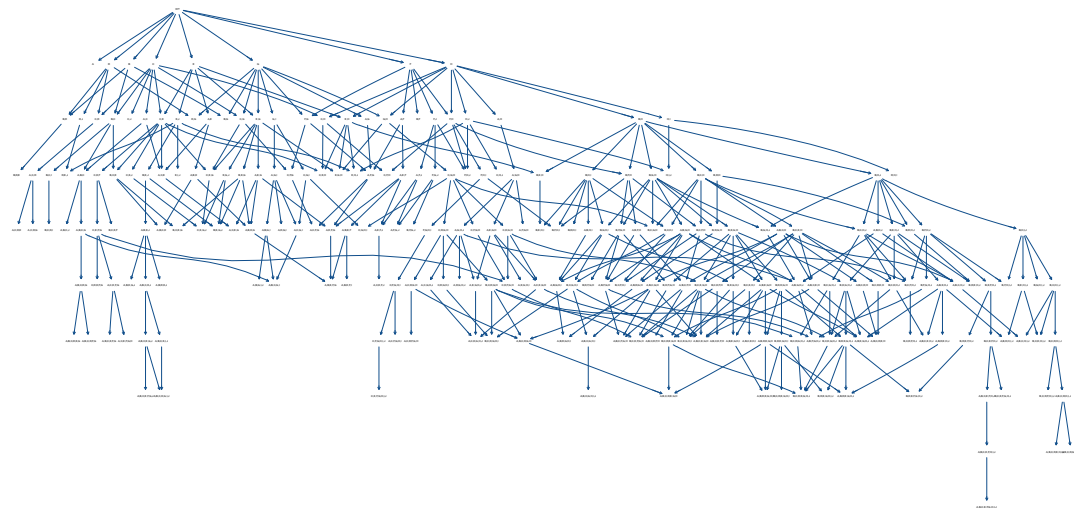

*ID* ZARoxejcvdMx5gej  
*acc genotypes* 335  
*peaks no back* 87  
*removed edges* NA  
*prop rem edges* NA

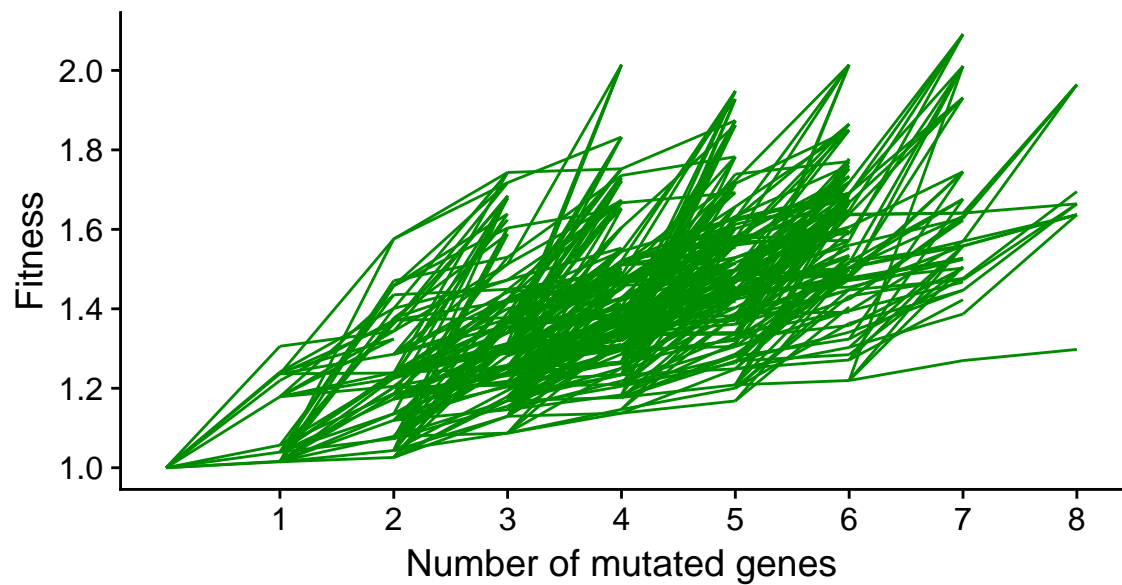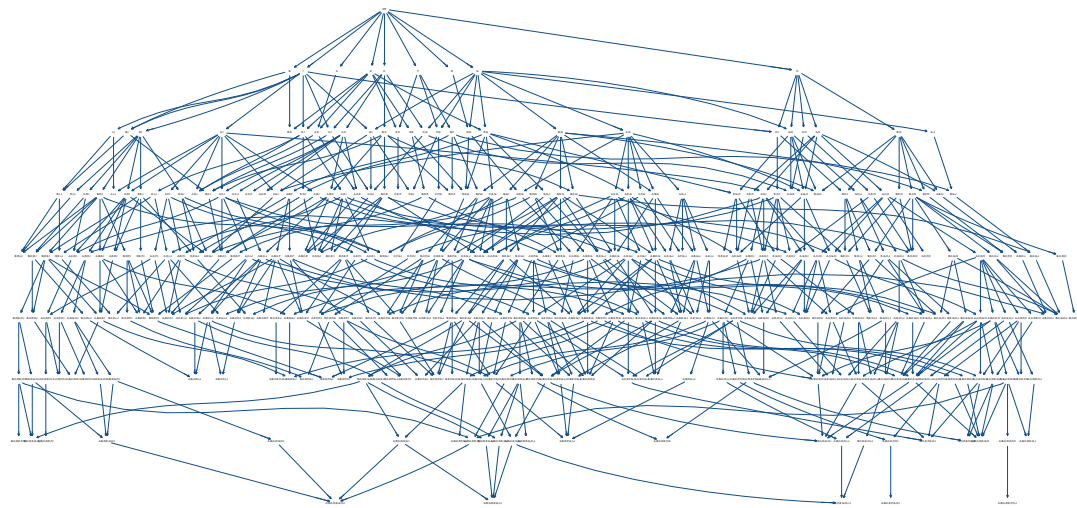

ID [zdCbK9OwSeu3jN2k](#)  
 acc genotypes **26**  
 peaks no back 12  
 removed edges NA  
 prop rem edges NA

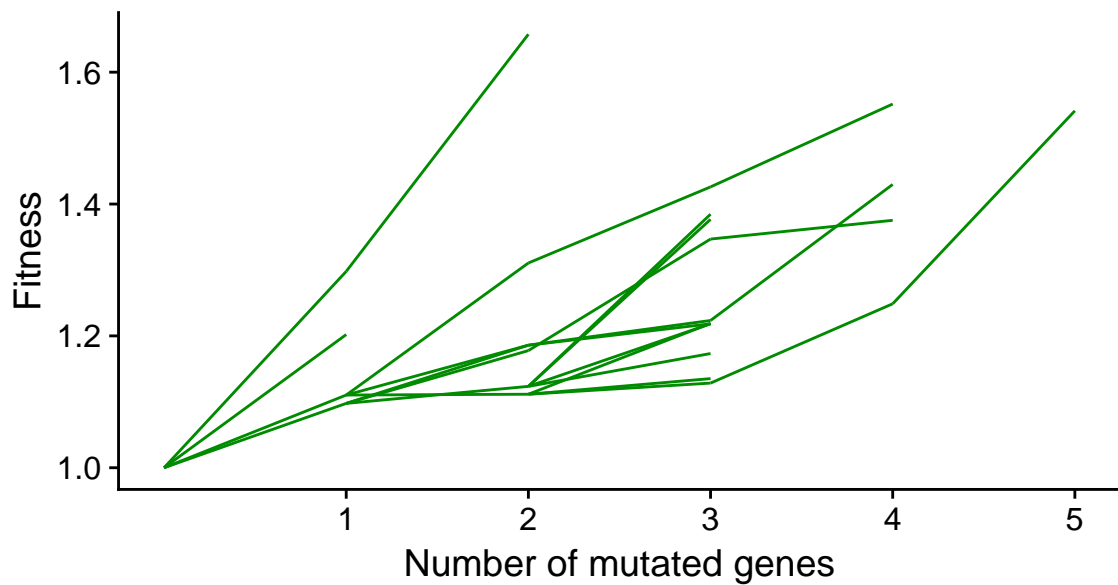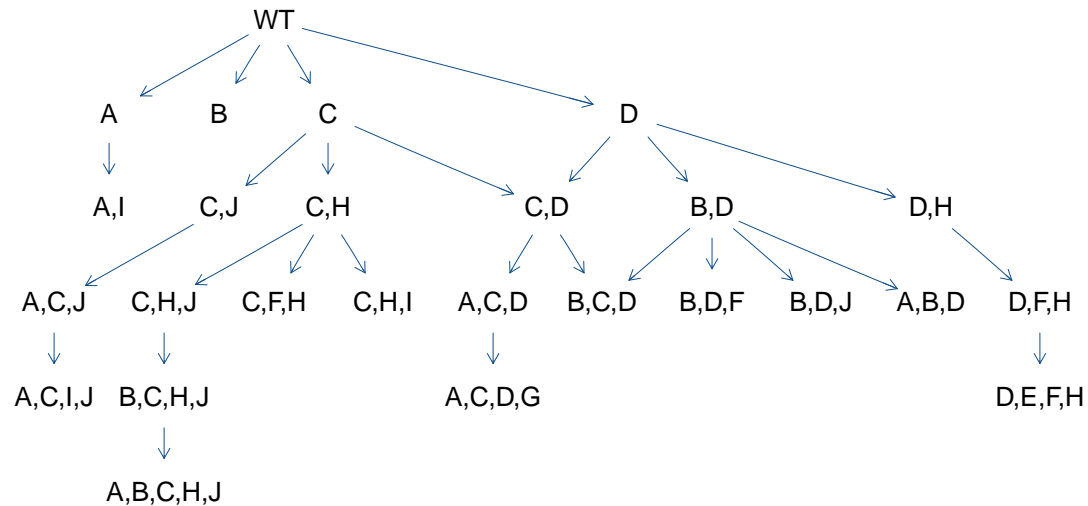

ID Zi10rjNfw5yh1JEKK  
 acc genotypes 37  
 peaks no back 15  
 removed edges NA  
 prop rem edges NA

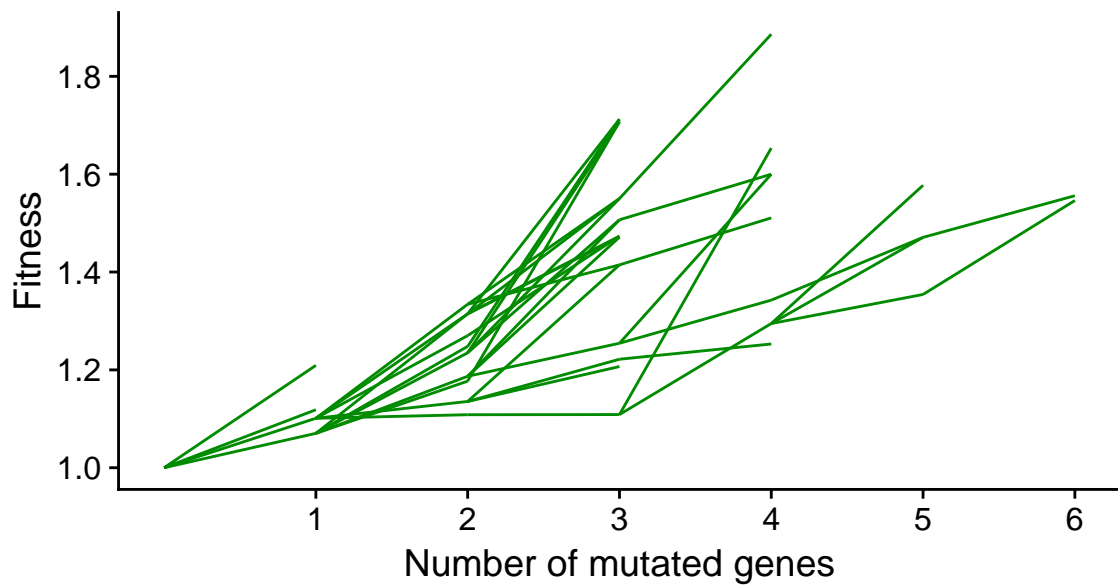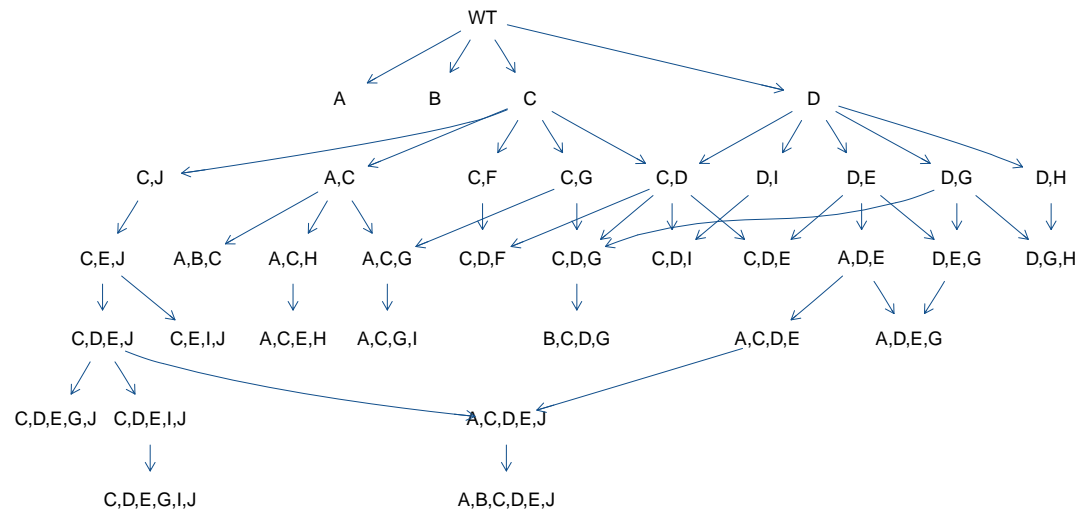

*ID* ZlwKQjyTXgfkZAaS  
*acc genotypes* 367  
*peaks no back* 83  
*removed edges* NA  
*prop rem edges* NA

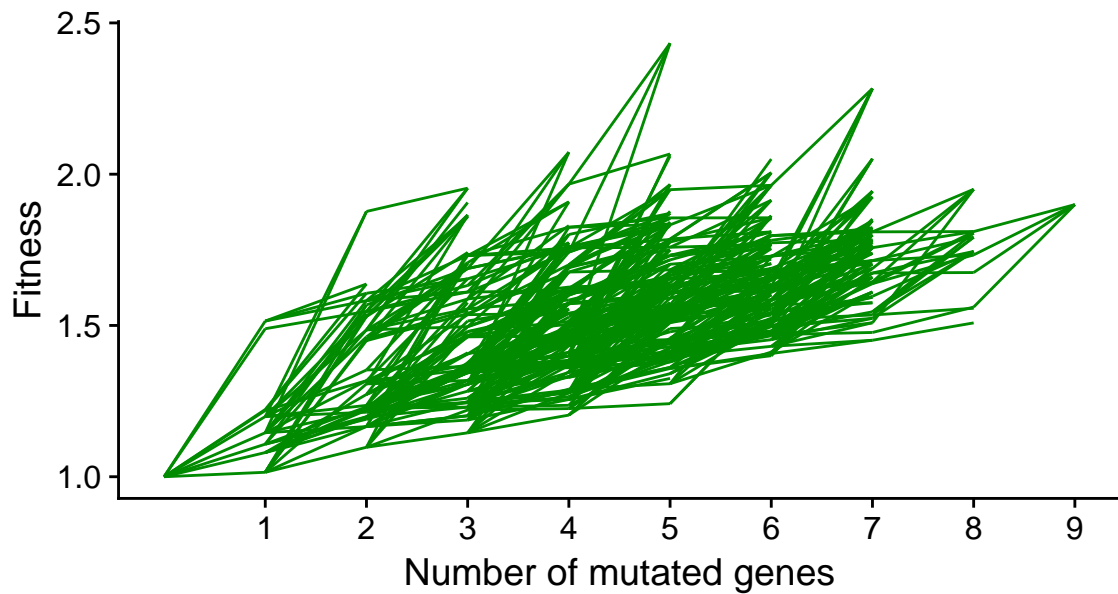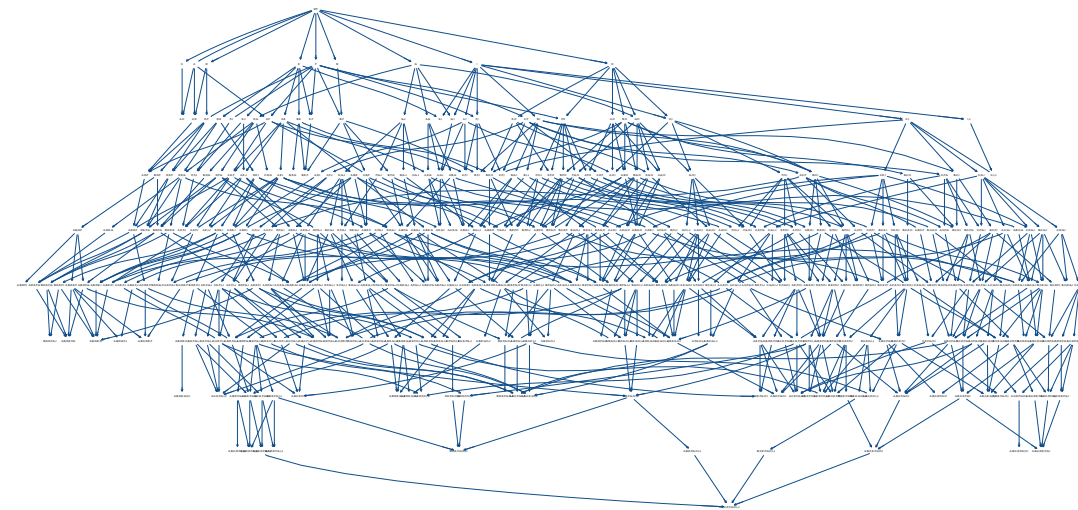



ID zja2YeEj3wZTfoRu  
 acc genotypes 121  
 peaks no back 36  
 removed edges NA  
 prop rem edges NA

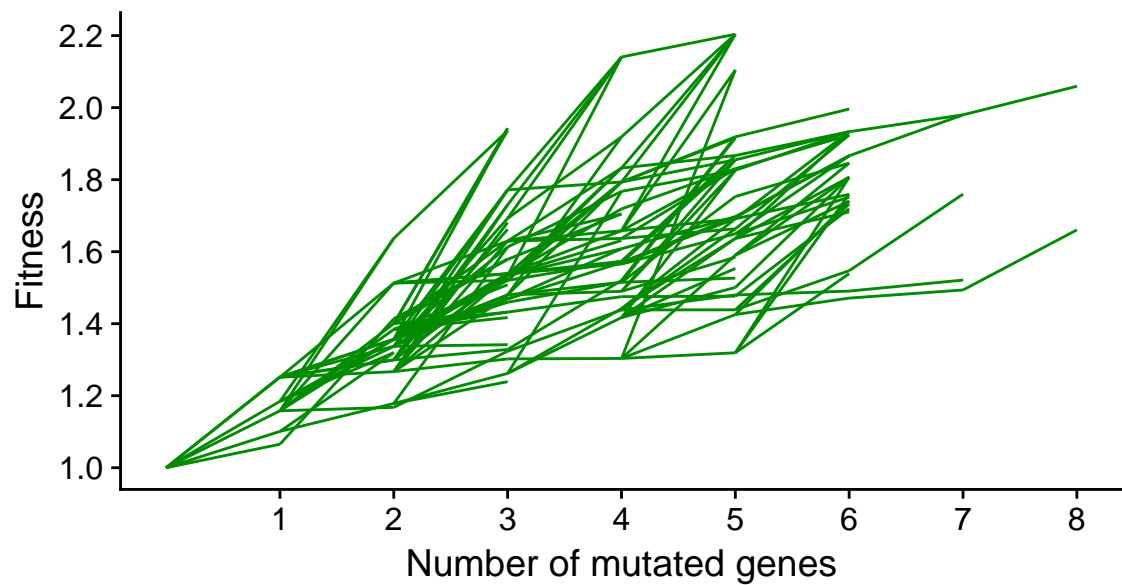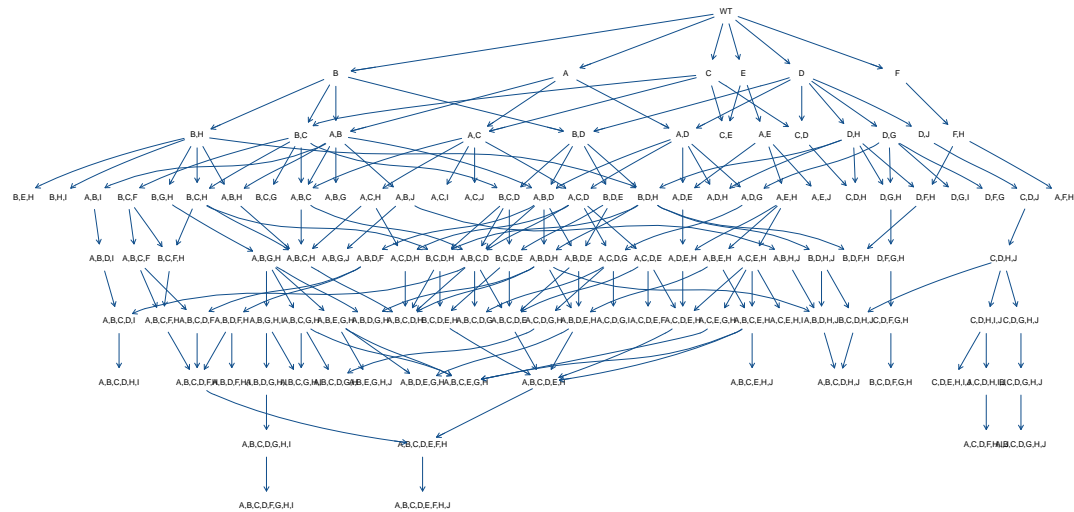

*ID* zk5E1osYtlIv7Cob  
*acc genotypes* 307  
*peaks no back* 54  
*removed edges* NA  
*prop rem edges* NA

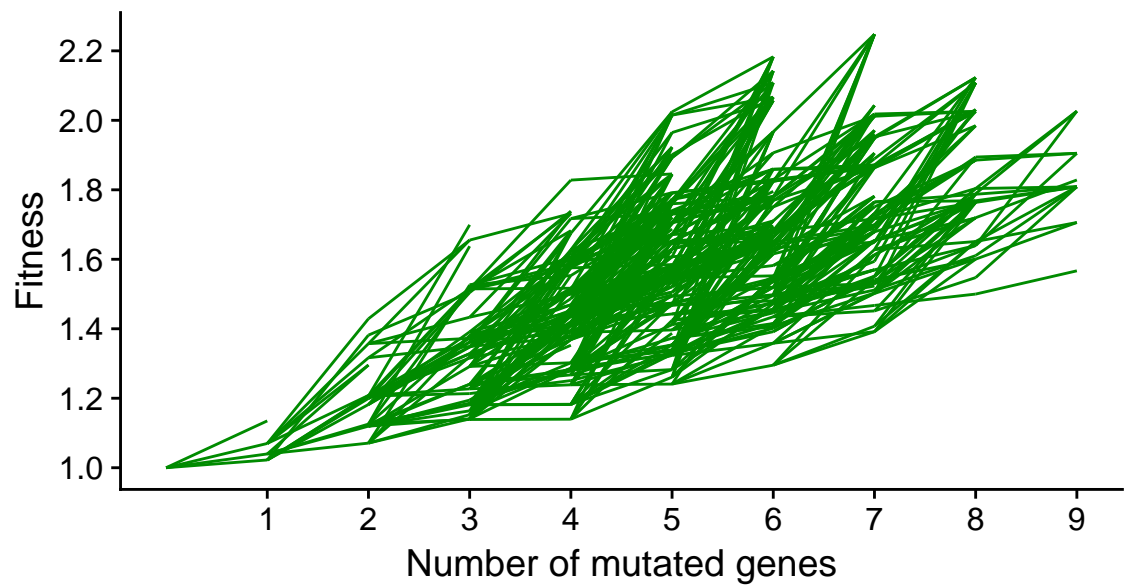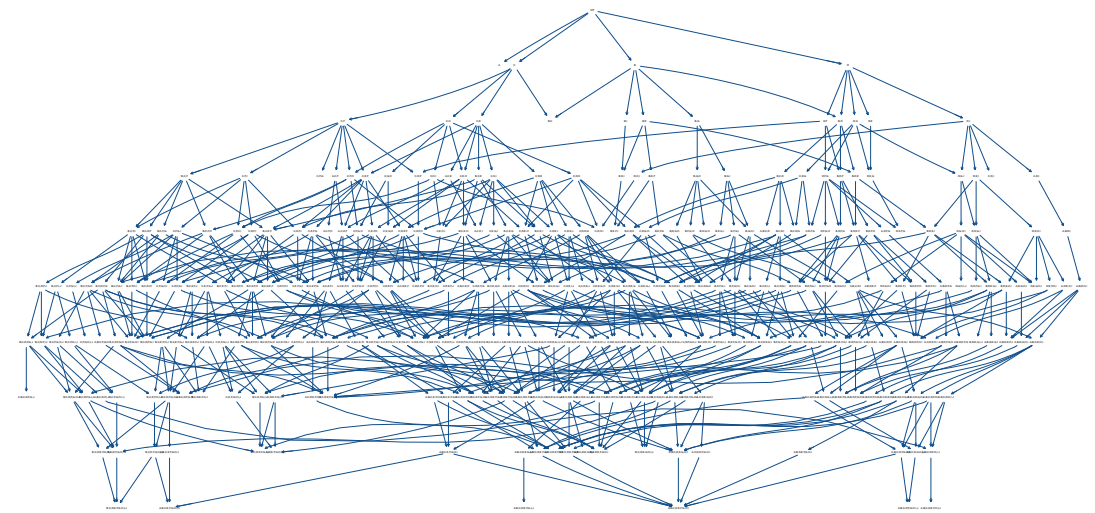

ID zSLtW8y3ke10umntK  
 acc genotypes 98  
 peaks no back 26  
 removed edges NA  
 prop rem edges NA

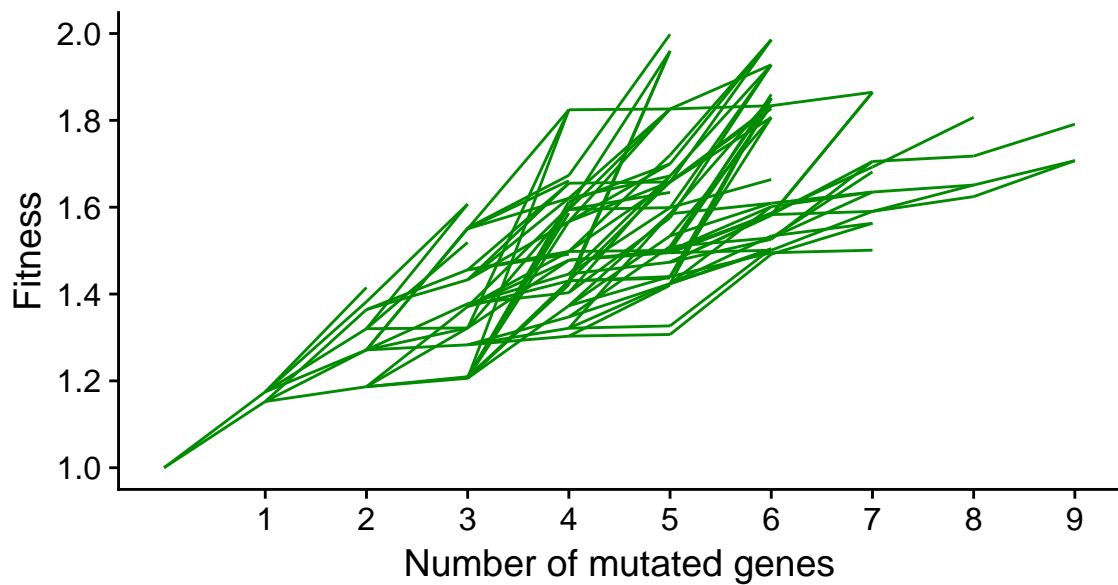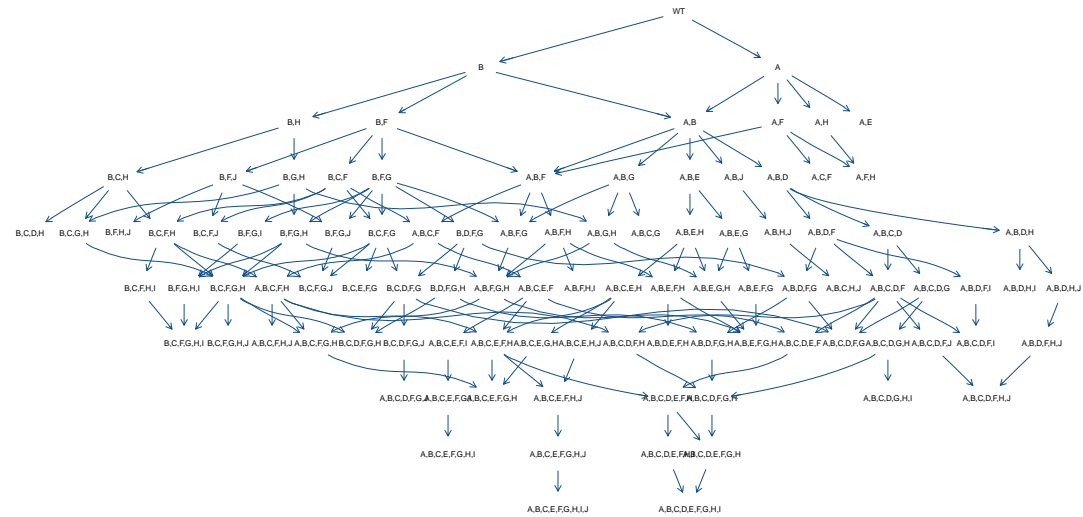

*ID* ZTNMfNi10xGkfS7ED  
*acc genotypes* 534  
*peaks no back* 52  
*removed edges* NA  
*prop rem edges* NA

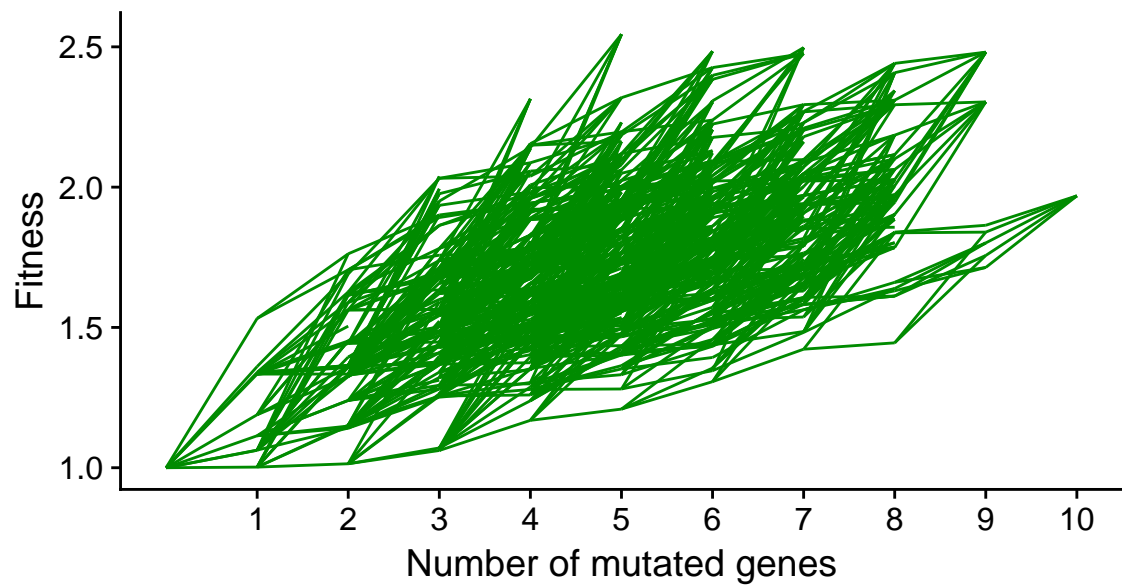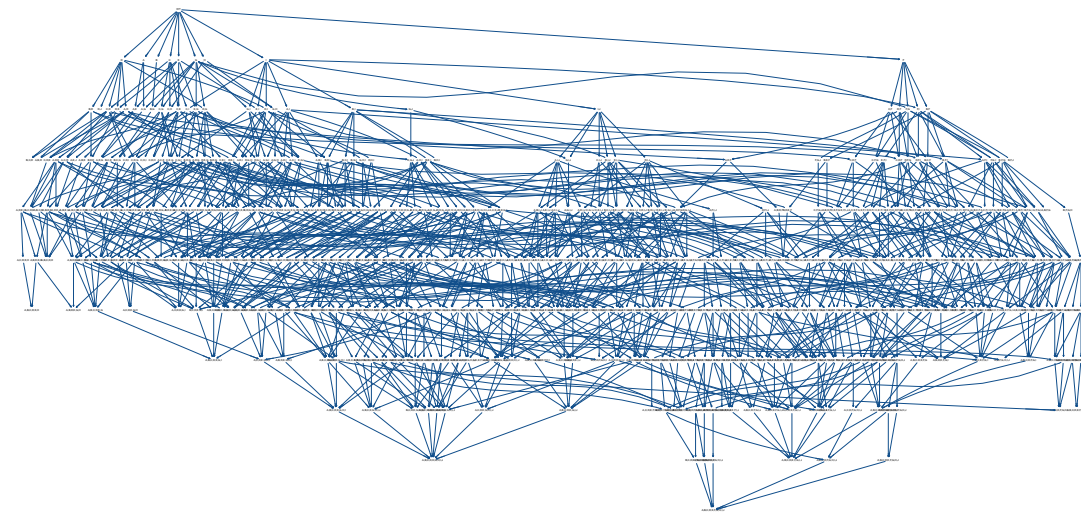

ID ZVzsQZQydHbT4TYZ  
 acc genotypes 42  
 peaks no back 20  
 removed edges NA  
 prop rem edges NA

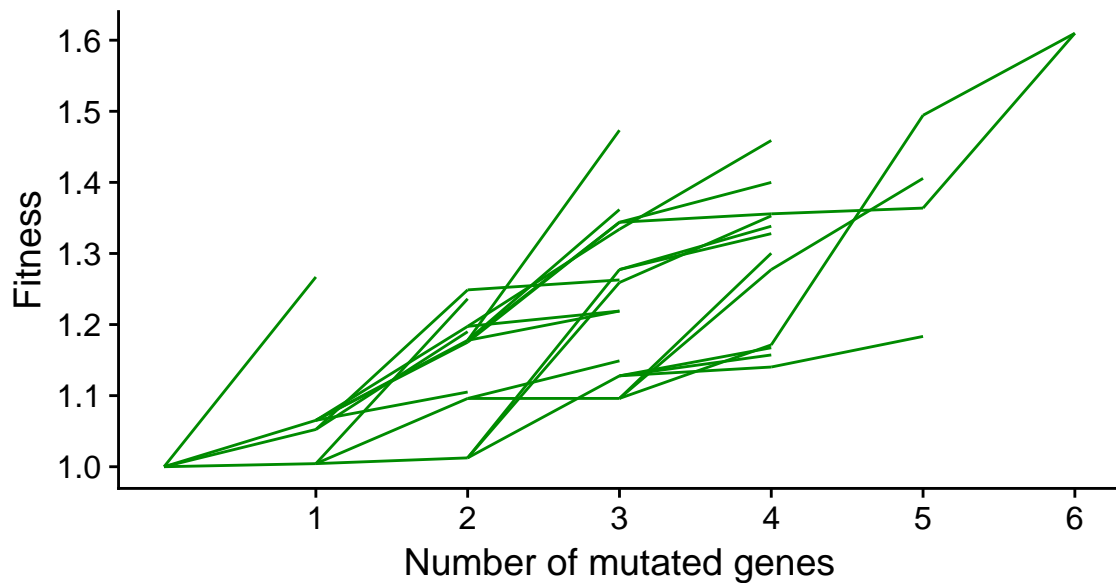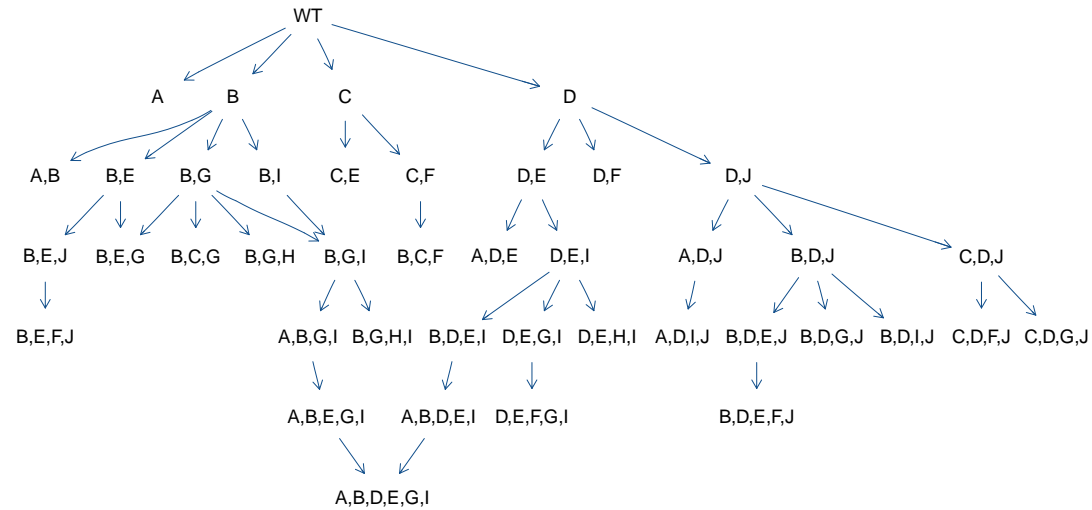

ID **zWjhPCHtGUy14jOB**  
 acc genotypes **154**  
 peaks no back **34**  
 removed edges **NA**  
 prop rem edges **NA**

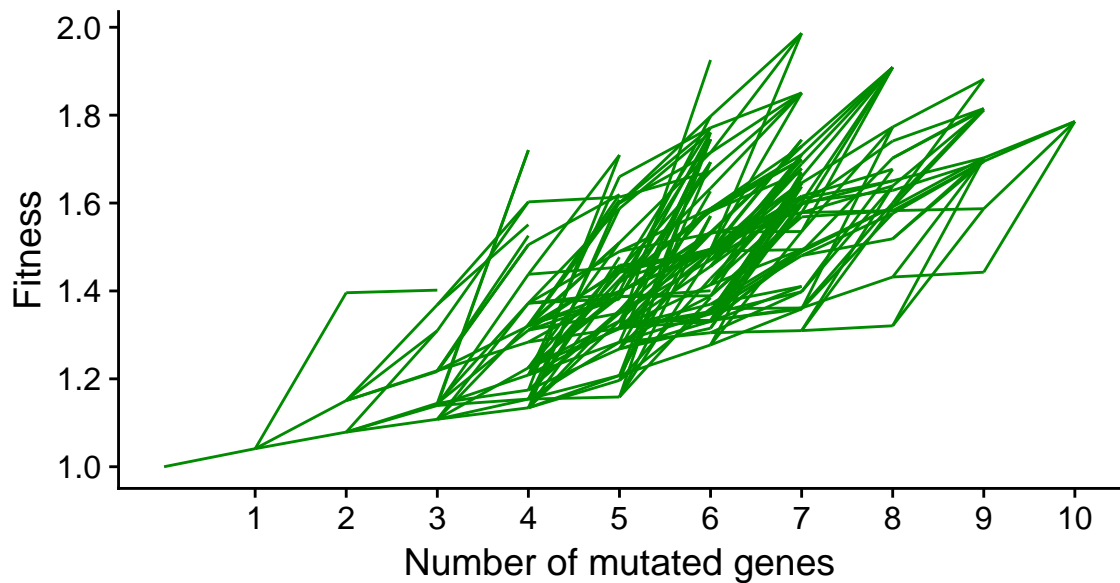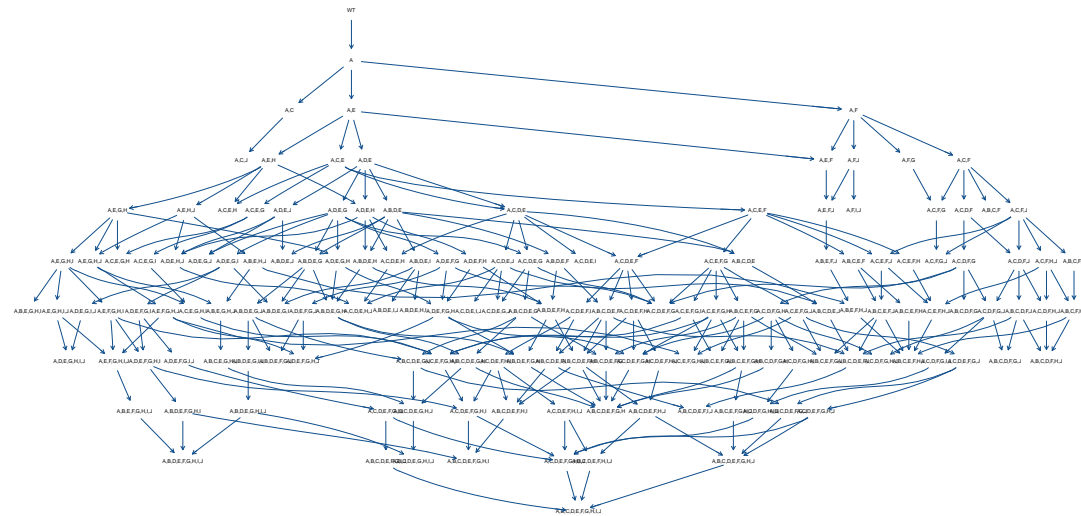

Supplement: Supplementary file [file 371039-3.pdf]
